# Supplementary material for: Single-molecule long-read sequencing of the full-length transcriptome of Rhododendron lapponicum L
Source: PubMed Central journal article supplement (PMC7174332; doi:10.1038/s41598-020-63814-x), 2020-04-21
Supplement: 41598_2020_63814_MOESM1_ESM.pdf [file 41598_2020_63814_MOESM1_ESM.pdf]

# Single-molecule long-read sequencing of the full-length transcriptome of *Rhododendron lapponicum* L.

Xinping Jia, Ling Tang, Xueying Mei, Huazhou Liu, Hairong Luo, Yanming Deng, Jiale Su

Institute of Leisure Agriculture, Jiangsu Academy of Agricultural Sciences, Jiangsu Key Laboratory for Horticultural Crop Genetic Improvement, Nanjing 210014, China

Table S1 Summary of polymerase reads from PacBio single-molecule long read sequencing

| Size | Post-filter polymerase reads | Post-filter total number of subread bases | Post-filter number of subread | Post-filter subreads N50 | Post-filter mean subread length |
|------|------------------------------|-------------------------------------------|-------------------------------|--------------------------|---------------------------------|
| 1-2K | 387,454                      | 5.27G                                     | 2,861,654                     | 1,782                    | 1,659                           |
| 2-3K | 334,062                      | 6.43G                                     | 3,573,056                     | 2,531                    | 2,440                           |
| 3-6K | 235,516                      | 3.67G                                     | 1,825,478                     | 3,406                    | 3,211                           |
