# Supplementary material for: Single-molecule long-read sequencing of the full-length transcriptome of Rhododendron lapponicum L
Source: PubMed Central journal article supplement (PMC7174332; doi:10.1038/s41598-020-63814-x), 2020-04-21
Supplement: 41598_2020_63814_MOESM2_ESM.pdf [file 41598_2020_63814_MOESM2_ESM.pdf]

# Single-molecule long-read sequencing of the full-length transcriptome of *Rhododendron lapponicum* L.

Xinping Jia, Ling Tang, Xueying Mei, Huazhou Liu, Hairong Luo, Yanming Deng, Jiale Su

Institute of Leisure Agriculture, Jiangsu Academy of Agricultural Sciences, Jiangsu Key Laboratory for Horticultural Crop Genetic Improvement, Nanjing 210014, China

Table S2 Summary of alternative splicing (AS) events predicted

| Query_Name                                                                                                                                       | Subject_Name                                                                                                                                                            | Qhsp<br>_Star<br>t1 | Qhs<br>p_E<br>nd1 | Qhsp<br>_Star<br>t2 | Qhs<br>p_E<br>nd2 | Shsp<br>_Sta<br>rt1 | Shsp<br>_En<br>d1 | Shsp<br>_Sta<br>rt2 | Shsp<br>_En<br>d2 |
|--------------------------------------------------------------------------------------------------------------------------------------------------|-------------------------------------------------------------------------------------------------------------------------------------------------------------------------|---------------------|-------------------|---------------------|-------------------|---------------------|-------------------|---------------------|-------------------|
| cb8564_c21909/f1p2/3933<br>isoform=cb8564_c21909;full_length_coverage=1;non_full_length_coverage=2;isoform_length=3933;expected_accuracy=0.998   | gnl BL_ORD_ID 11819      cb8564_c15229/f1p2/4082<br>isoform=cb8564_c15229;full_length_coverage=1;non_full_length_coverage=2;isoform_length=4082;expected_accuracy=1.000 | 131                 | 3933              | 1                   | 130               | 279                 | 408<br>2          | 24                  | 153               |
| cb8564_c44005/f1p0/3815<br>isoform=cb8564_c44005;full_length_coverage=1;non_full_length_coverage=0;isoform_length=3815;expected_accuracy=0.993   | gnl BL_ORD_ID 56019      cb8564_c52510/f6p2/4563                                                                                                                        | 1                   | 2046              | 2041                | 3808              | 46                  | 209<br>4          | 2194                | 396<br>9          |
| cb5600_c21/f1p0/2784                                                                                                                             | gnl BL_ORD_ID 74133      cb5600_c6/f1p0/2661                                                                                                                            | 1                   | 2095              | 2098                | 2525              | 31                  | 212<br>5          | 2237                | 266<br>3          |
| cb8564_c147929/f1p0/2042<br>isoform=cb8564_c147929;full_length_coverage=1;non_full_length_coverage=0;isoform_length=2042;expected_accuracy=0.992 | gnl BL_ORD_ID 55709      cb8564_c4950/f1p0/2564                                                                                                                         | 1                   | 1246              | 1247                | 2018              | 44                  | 129<br>1          | 1656                | 242<br>7          |
| cb8564_c81531/f1p0/2743<br>isoform=cb8564_c81531;full_length_coverage=1;non_full_length_coverage=0;isoform_length=2743;expected_accuracy=0.996   | gnl BL_ORD_ID 57893      cb8564_c83527/f2p2/3885                                                                                                                        | 1                   | 2217              | 2214                | 2710              | 1                   | 220<br>5          | 3349                | 385<br>1          |
| cb14724_c0/f4p1/1726<br>isoform=cb14724_c0;full_length_coverage=4;non_full_length_coverage=1;isoform_length=1726;expected_accuracy=1.000         | gnl BL_ORD_ID 40277      cb3622_c10/f1p0/3532<br>isoform=cb3622_c10;full_length_coverage=1;non_full_length_coverage=0;isoform_length=3532;expected_accuracy=0.999       | 1                   | 1352              | 1351                | 1725              | 1                   | 135<br>1          | 2693                | 306<br>4          |

|                                                                                                                                                  |                                                                                                                                                                    |     |      |      |      |      |          |      |          |
|--------------------------------------------------------------------------------------------------------------------------------------------------|--------------------------------------------------------------------------------------------------------------------------------------------------------------------|-----|------|------|------|------|----------|------|----------|
| cb8564_c52723/f2p0/3547<br>isoform=cb8564_c52723;full_length_coverage=2;non_full_length_coverage=0;isoform_length=3547;expected_accuracy=0.990   | gnl BL_ORD_ID 55991 cb8564_c51339/f1p0/3758                                                                                                                        | 360 | 3472 | 4    | 363  | 652  | 377<br>3 | 3    | 361      |
| cb4123_c54/f1p3/1372<br>isoform=cb4123_c54;full_length_coverage=1;non_full_length_coverage=3;isoform_length=1372;expected_accuracy=1.000         | gnl BL_ORD_ID 41188 cb4123_c19/f1p0/2726<br>isoform=cb4123_c19;full_length_coverage=1;non_full_length_coverage=0;isoform_length=2726;expected_accuracy=1.000       | 139 | 1339 | 2    | 144  | 1526 | 272<br>6 | 1    | 143      |
| cb8564_c179457/f1p0/2647<br>isoform=cb8564_c179457;full_length_coverage=1;non_full_length_coverage=0;isoform_length=2647;expected_accuracy=1.000 | gnl BL_ORD_ID 14058 cb8564_c23936/f1p0/3016<br>isoform=cb8564_c23936;full_length_coverage=1;non_full_length_coverage=0;isoform_length=3016;expected_accuracy=0.995 | 1   | 1692 | 1690 | 2563 | 4    | 171<br>6 | 2143 | 301<br>6 |
| cb8564_c116262/f1p0/2136                                                                                                                         | gnl BL_ORD_ID 53028 cb8564_c114755/f1p0/2541                                                                                                                       | 236 | 2105 | 3    | 240  | 441  | 231<br>0 | 79   | 316      |
| cb12513_c86/f1p1/1373                                                                                                                            | gnl BL_ORD_ID 14255 cb8564_c3884/f1p1/2696<br>isoform=cb8564_c3884;full_length_coverage=1;non_full_length_coverage=1;isoform_length=2696;expected_accuracy=0.993   | 311 | 1363 | 34   | 312  | 1542 | 259<br>0 | 10   | 287      |
| cb8564_c844/f2p0/2586<br>isoform=cb8564_c844;full_length_coverage=2;non_full_length_coverage=0;isoform_length=2586;expected_accuracy=1.000       | gnl BL_ORD_ID 17665 cb8564_c865/f4p0/2761<br>isoform=cb8564_c865;full_length_coverage=4;non_full_length_coverage=0;isoform_length=2761;expected_accuracy=0.996     | 1   | 2343 | 2341 | 2528 | 17   | 236<br>1 | 2574 | 276<br>1 |
| cb1770_c25/f1p0/3573                                                                                                                             | gnl BL_ORD_ID 33526 cb1770_c15/f1p0/3678<br>isoform=cb1770_c15;full_length_coverage=1;non_full_length_coverage=0;isoform_length=3678;expected_accuracy=0.992       | 1   | 1748 | 1747 | 3373 | 183  | 193<br>3 | 2049 | 367<br>8 |

|                          |                                                                                                                                                                         |     |      |      |      |      |          |      |          |
|--------------------------|-------------------------------------------------------------------------------------------------------------------------------------------------------------------------|-----|------|------|------|------|----------|------|----------|
| cb1540_c27/f1p0/3741     | gnl BL_ORD_ID 28145      cb1540_c7/f1p0/4274<br>isoform=cb1540_c7;full_length_coverage=1;non_full_length_coverage=0;isoform_length=4274;expected_accuracy=0.996         | 304 | 3535 | 1    | 303  | 993  | 424<br>6 | 465  | 766      |
| cb8456_c128/f1p1/1805    | gnl BL_ORD_ID 52549      cb8456_c63/f1p0/2043<br>isoform=cb8456_c128;full_length_coverage=1;non_full_length_coverage=1;isoform_length=1805;expected_accuracy=0.994      | 1   | 1371 | 1366 | 1785 | 1    | 135<br>6 | 1471 | 188<br>8 |
| cb1494_c17/f1p0/2481     | gnl BL_ORD_ID 29800      cb1494_c10/f1p0/3165<br>isoform=cb1494_c10;full_length_coverage=1;non_full_length_coverage=0;isoform_length=3165;expected_accuracy=0.994       | 1   | 1198 | 1199 | 2381 | 3    | 1196     | 1917 | 310<br>0 |
| cb6730_c14/f1p0/2258     | gnl BL_ORD_ID 5875      cb6730_c2/f5p0/2632<br>isoform=cb6730_c2;full_length_coverage=5;non_full_length_coverage=0;isoform_length=2632;expected_accuracy=1.000          | 1   | 1382 | 1381 | 2267 | 15   | 139<br>1 | 1654 | 252<br>1 |
| cb8564_c128275/f1p1/2721 | gnl BL_ORD_ID 54097      cb8564_c18464/f1p0/3061                                                                                                                        | 430 | 2708 | 55   | 435  | 578  | 285<br>7 | 1    | 376      |
| cb8564_c35568/f1p0/2997  | gnl BL_ORD_ID 16879      cb8564_c48606/f1p1/3308<br>isoform=cb8564_c48606;full_length_coverage=1;non_full_length_coverage=1;isoform_length=3308;expected_accuracy=0.998 | 13  | 2174 | 2170 | 2889 | 1    | 215<br>1 | 2587 | 330<br>8 |
| cb1822_c3/f1p1/3787      | gnl BL_ORD_ID 32354      cb1822_c17/f1p0/5987<br>isoform=cb1822_c3;full_length_coverage=1;non_full_length_coverage=1;isoform_length=3787;expected_accuracy=0.998        | 1   | 3205 | 3206 | 3786 | 2033 | 524<br>1 | 5410 | 598<br>7 |



|                                                                                                                                                |                                                                                                                                                                           |     |      |      |      |      |      |      |      |
|------------------------------------------------------------------------------------------------------------------------------------------------|---------------------------------------------------------------------------------------------------------------------------------------------------------------------------|-----|------|------|------|------|------|------|------|
| cb8564_c3632/f1p0/3696<br>isoform=cb8564_c3632;full_length_coverage=1;non_full_length_coverage=0;isoform_length=3696;expected_accuracy=0.998   | gnl BL_ORD_ID 17598      cb8564_c801/f2p0/4265<br>isoform=cb8564_c801;full_length_coverage=2;non_full_length_coverage=0;isoform_length=4265;expected_accuracy=0.998       | 1   | 2117 | 2115 | 3696 | 1    | 2121 | 2683 | 4264 |
| cb8564_c2692/f2p0/2586<br>isoform=cb8564_c2692;full_length_coverage=2;non_full_length_coverage=0;isoform_length=2586;expected_accuracy=0.999   | gnl BL_ORD_ID 54793      cb8564_c2694/f1p2/4102                                                                                                                           | 1   | 1548 | 1549 | 2586 | 467  | 2018 | 3068 | 4105 |
| cb2550_c4/f1p1/2016<br>isoform=cb2550_c4;full_length_coverage=1;non_full_length_coverage=1;isoform_length=2016;expected_accuracy=0.995         | gnl BL_ORD_ID 37839      cb2550_c3/f1p1/3883<br>isoform=cb2550_c3;full_length_coverage=1;non_full_length_coverage=1;isoform_length=3883;expected_accuracy=0.992           | 141 | 1955 | 1    | 143  | 2065 | 3879 | 342  | 485  |
| cb8564_c5007/f1p0/1941                                                                                                                         | gnl BL_ORD_ID 12954      cb8564_c161772/f7p6/3766<br>isoform=cb8564_c161772;full_length_coverage=7;non_full_length_coverage=6;isoform_length=3766;expected_accuracy=0.997 | 1   | 1447 | 1446 | 1802 | 1831 | 3277 | 3409 | 3766 |
| cb2716_c2/f1p0/2568                                                                                                                            | gnl BL_ORD_ID 37132      cb2716_c0/f1p0/3829<br>isoform=cb2716_c0;full_length_coverage=1;non_full_length_coverage=0;isoform_length=3829;expected_accuracy=0.999           | 1   | 1563 | 1560 | 2341 | 118  | 1680 | 2772 | 3553 |
| cb8292_c5/f2p0/1876<br>isoform=cb8292_c5;full_length_coverage=2;non_full_length_coverage=0;isoform_length=1876;expected_accuracy=0.999         | gnl BL_ORD_ID 9293      cb8292_c11/f1p1/2274<br>isoform=cb8292_c11;full_length_coverage=1;non_full_length_coverage=1;isoform_length=2274;expected_accuracy=0.997          | 234 | 1876 | 75   | 236  | 291  | 1932 | 13   | 176  |
| cb8564_c44698/f1p5/2843<br>isoform=cb8564_c44698;full_length_coverage=1;non_full_length_coverage=0;isoform_length=2843;expected_accuracy=0.998 | gnl BL_ORD_ID 14399      cb8564_c39189/f1p1/2975<br>isoform=cb8564_c39189;full_length_coverage=1;non_full_length_coverage=0;isoform_length=2975;expected_accuracy=0.998   | 1   | 2516 | 2511 | 2829 | 1    | 2531 | 2650 | 2975 |

|                                                                                                                                               |                                                                                                                                                                                   |     |      |      |      |      |          |      |          |  |
|-----------------------------------------------------------------------------------------------------------------------------------------------|-----------------------------------------------------------------------------------------------------------------------------------------------------------------------------------|-----|------|------|------|------|----------|------|----------|--|
| ull_length_coverage=5;isoform_length=2843;expected_accuracy=0.997<br>cb4674_c44/f1p2/2925                                                     | ll_length_coverage=1;isoform_length=2975;expected_accuracy=0.992                                                                                                                  |     |      |      |      |      |          |      |          |  |
| isoform=cb4674_c44;full_length_coverage=1;non_full_length_coverage=2;isoform_length=2925;expected_accuracy=0.991<br>cb3139_c7/f1p0/2420       | gnl BL_ORD_ID 72844 cb4674_c33/f1p3/3281                                                                                                                                          | 1   | 2069 | 2067 | 2913 | 165  | 222<br>0 | 2382 | 322<br>7 |  |
| isoform=cb3139_c7;full_length_coverage=1;non_full_length_coverage=0;isoform_length=2420;expected_accuracy=1.000<br>cb8564_c129638/f1p0/2479   | gnl BL_ORD_ID 37016                      cb3139_c2/f2p1/3600<br>isoform=cb3139_c2;full_length_coverage=2;non_full_length_coverage=1;isoform_length=3600;expected_accuracy=0.998   | 377 | 2420 | 40   | 379  | 1448 | 349<br>0 | 1    | 340      |  |
| isoform=cb8564_c129638;full_length_coverage=1;non_full_length_coverage=0;isoform_length=2479;expected_accuracy=1.000<br>cb1935_c14/f1p0/3028  | gnl BL_ORD_ID 54482 cb8564_c124018/f1p1/3057                                                                                                                                      | 1   | 1627 | 1623 | 2474 | 51   | 167<br>7 | 2082 | 293<br>3 |  |
| isoform=cb1935_c14;full_length_coverage=2;non_full_length_coverage=0;isoform_length=3028;expected_accuracy=0.995<br>cb10612_c4/f1p0/1284      | gnl BL_ORD_ID 35521                      cb1935_c10/f2p0/3205<br>isoform=cb1935_c10;full_length_coverage=2;non_full_length_coverage=0;isoform_length=3205;expected_accuracy=0.995 | 11  | 1968 | 1963 | 3017 | 46   | 200<br>3 | 2126 | 317<br>6 |  |
| isoform=cb10612_c4;full_length_coverage=1;non_full_length_coverage=0;isoform_length=1284;expected_accuracy=1.000<br>cb4123_c103/f1p0/1158     | gnl BL_ORD_ID 2641                      cb10612_c5/f4p1/1487<br>isoform=cb10612_c5;full_length_coverage=4;non_full_length_coverage=1;isoform_length=1487;expected_accuracy=0.999  | 585 | 1282 | 6    | 589  | 790  | 148<br>7 | 1    | 584      |  |
| isoform=cb4123_c103;full_length_coverage=1;non_full_length_coverage=0;isoform_length=1158;expected_accuracy=0.994<br>cb8564_c178999/f1p0/2222 | gnl BL_ORD_ID 70778 cb4123_c26/f1p0/1586                                                                                                                                          | 292 | 1178 | 9    | 297  | 462  | 134<br>9 | 1    | 288      |  |
| isoform=cb8564_c178999;full_length_coverage=1;non_full_length_coverage=0;isoform_length=2222;expected_accuracy=0.994                          | gnl BL_ORD_ID 55912 cb8564_c48681/f1p0/3431                                                                                                                                       | 13  | 1778 | 1773 | 2222 | 6    | 176<br>2 | 2768 | 322<br>0 |  |

|                                                                                                                                                  |                                                                                                                                                                           |      |      |      |      |      |          |      |          |
|--------------------------------------------------------------------------------------------------------------------------------------------------|---------------------------------------------------------------------------------------------------------------------------------------------------------------------------|------|------|------|------|------|----------|------|----------|
| cb1860_c13/f1p0/2150<br>isoform=cb1860_c13;full_length_coverage=1;non_full_length_coverage=0;isoform_length=2150;expected_accuracy=0.998         | gnl BL_ORD_ID 34591      cb1860_c35/f18p4/2527<br>isoform=cb1860_c35;full_length_coverage=18;non_full_length_coverage=4;isoform_length=2527;expected_accuracy=1.000       | 1    | 1277 | 1273 | 2146 | 115  | 139<br>2 | 1645 | 252<br>7 |
| cb6569_c6/f1p1/2392<br>isoform=cb6569_c6;full_length_coverage=1;non_full_length_coverage=1;isoform_length=2392;expected_accuracy=0.995           | gnl BL_ORD_ID 3967      cb6569_c2/f2p1/2601<br>isoform=cb6569_c2;full_length_coverage=2;non_full_length_coverage=1;isoform_length=2601;expected_accuracy=1.000            | 1    | 1678 | 1673 | 2392 | 15   | 169<br>3 | 1805 | 252<br>4 |
| cb8564_c173799/f1p3/2289<br>isoform=cb8564_c173799;full_length_coverage=1;non_full_length_coverage=3;isoform_length=2289;expected_accuracy=1.000 | gnl BL_ORD_ID 11724      cb8564_c124026/f1p1/2665<br>isoform=cb8564_c124026;full_length_coverage=1;non_full_length_coverage=1;isoform_length=2665;expected_accuracy=1.000 | 1    | 1670 | 1669 | 2259 | 1    | 167<br>6 | 2068 | 266<br>1 |
| cb8564_c42654/f1p1/2906<br>isoform=cb8564_c42654;full_length_coverage=1;non_full_length_coverage=1;isoform_length=2906;expected_accuracy=0.990   | gnl BL_ORD_ID 18852      cb8564_c84488/f1p0/3408<br>isoform=cb8564_c84488;full_length_coverage=1;non_full_length_coverage=0;isoform_length=3408;expected_accuracy=0.996   | 221  | 2824 | 1    | 221  | 790  | 338<br>8 | 1    | 217      |
| cb2770_c2/f3p0/2565<br>isoform=cb2770_c2;full_length_coverage=3;non_full_length_coverage=0;isoform_length=2565;expected_accuracy=0.999           | gnl BL_ORD_ID 69963      cb2770_c47/f1p0/3578                                                                                                                             | 1    | 1676 | 1676 | 2565 | 4    | 167<br>9 | 2474 | 337<br>8 |
| cb8564_c10938/f1p1/2321                                                                                                                          | gnl BL_ORD_ID 53888      cb8564_c13732/f1p0/4239                                                                                                                          | 1    | 1315 | 1310 | 2292 | 1326 | 264<br>0 | 2759 | 374<br>1 |
| cb181_c38/f1p0/2538                                                                                                                              | gnl BL_ORD_ID 63590      cb181_c41/f1p0/2832                                                                                                                              | 1089 | 2510 | 1    | 1094 | 1232 | 265<br>2 | 1    | 1104     |
| cb1960_c41/f1p1/2517                                                                                                                             | gnl BL_ORD_ID 35970      cb1960_c63/f1p4/2956<br>isoform=cb1960_c63;full_length_coverage=1;non_full_l                                                                     | 2    | 2123 | 2120 | 2503 | 15   | 213<br>6 | 2533 | 289<br>9 |

|                                                                                                                      |                                                                                                                   |                          |      |      |      |      |      |     |      |      |
|----------------------------------------------------------------------------------------------------------------------|-------------------------------------------------------------------------------------------------------------------|--------------------------|------|------|------|------|------|-----|------|------|
|                                                                                                                      | ength_coverage=4;isoform_length=2956;expected_accuracy=0.999                                                      |                          |      |      |      |      |      |     |      |      |
| cb7637_c13/f1p1/2121                                                                                                 | gnl BL_ORD_ID 8865                                                                                                | cb7637_c18/f1p1/2421     |      |      |      |      |      |     |      |      |
| isoform=cb7637_c13;full_length_coverage=1;non_full_length_coverage=1;isoform_length=2121;expected_accuracy=0.996     | isoform=cb7637_c18;full_length_coverage=1;non_full_length_coverage=1;isoform_length=2421;expected_accuracy=0.998  |                          | 404  | 2121 | 5    | 404  | 648  | 236 | 1    | 401  |
|                                                                                                                      |                                                                                                                   |                          |      |      |      |      |      | 5   |      |      |
| cb7210_c10/f1p0/2452                                                                                                 | gnl BL_ORD_ID 8857                                                                                                | cb7210_c5/f1p1/3158      |      |      |      |      |      |     |      |      |
| isoform=cb7210_c10;full_length_coverage=1;non_full_length_coverage=0;isoform_length=2452;expected_accuracy=0.996     | isoform=cb7210_c5;full_length_coverage=1;non_full_length_coverage=1;isoform_length=3158;expected_accuracy=0.998   |                          | 1100 | 2451 | 1    | 1102 | 1807 | 315 | 1    | 1102 |
|                                                                                                                      |                                                                                                                   |                          |      |      |      |      |      | 8   |      |      |
| cb4549_c5/f1p0/1871                                                                                                  | gnl BL_ORD_ID 41890                                                                                               | cb4549_c0/f2p0/1976      |      |      |      |      |      |     |      |      |
| isoform=cb4549_c5;full_length_coverage=1;non_full_length_coverage=0;isoform_length=1871;expected_accuracy=0.995      | isoform=cb4549_c0;full_length_coverage=2;non_full_length_coverage=0;isoform_length=1976;expected_accuracy=0.998   |                          | 386  | 1871 | 39   | 385  | 471  | 195 | 1    | 364  |
|                                                                                                                      |                                                                                                                   |                          |      |      |      |      |      | 5   |      |      |
| cb8564_c188097/f1p0/2552                                                                                             | gnl BL_ORD_ID 56010                                                                                               | cb8564_c51971/f1p0/3064  |      |      |      |      |      |     |      |      |
| isoform=cb8564_c188097;full_length_coverage=1;non_full_length_coverage=0;isoform_length=2552;expected_accuracy=0.996 |                                                                                                                   |                          | 1    | 1945 | 1940 | 2552 | 10   | 195 | 2057 | 266  |
|                                                                                                                      |                                                                                                                   |                          |      |      |      |      |      | 4   |      | 9    |
| cb10045_c36/f38p2/1421                                                                                               | gnl BL_ORD_ID 1795                                                                                                | cb10045_c18/f1p2/1574    |      |      |      |      |      |     |      |      |
| isoform=cb10045_c36;full_length_coverage=38;non_full_length_coverage=2;isoform_length=1421;expected_accuracy=1.000   | isoform=cb10045_c18;full_length_coverage=1;non_full_length_coverage=2;isoform_length=1574;expected_accuracy=1.000 |                          | 140  | 1421 | 12   | 140  | 251  | 152 | 1    | 129  |
|                                                                                                                      |                                                                                                                   |                          |      |      |      |      |      | 3   |      |      |
| cb8564_c115486/f1p1/3203                                                                                             | gnl BL_ORD_ID 52899                                                                                               | cb8564_c111240/f1p1/3895 |      |      |      |      |      |     |      |      |
|                                                                                                                      |                                                                                                                   |                          | 104  | 3229 | 1    | 102  | 653  | 377 | 232  | 334  |
|                                                                                                                      |                                                                                                                   |                          |      |      |      |      |      | 5   |      |      |
| cb1648_c1/f9p1/2048                                                                                                  | gnl BL_ORD_ID 66333                                                                                               | cb1648_c27/f1p1/2264     |      |      |      |      |      |     |      |      |
| isoform=cb1648_c1;full_length_coverage=9;non_full_length_coverage=0;isoform_length=2048;expected_accuracy=0.999      |                                                                                                                   |                          | 280  | 2048 | 49   | 280  | 382  | 215 | 1    | 233  |
|                                                                                                                      |                                                                                                                   |                          |      |      |      |      |      | 0   |      |      |

|                                                                                                                      |                                                                                                                     |                         |     |      |      |      |     |      |      |     |   |
|----------------------------------------------------------------------------------------------------------------------|---------------------------------------------------------------------------------------------------------------------|-------------------------|-----|------|------|------|-----|------|------|-----|---|
| ngth_coverage=1;isoform_length=2048;expected_accuracy=1.000                                                          |                                                                                                                     |                         |     |      |      |      |     |      |      |     |   |
| cb3388_c6/f1p0/2642                                                                                                  | gnl BL_ORD_ID 39985                                                                                                 | cb3388_c11/f1p0/3143    |     |      |      |      |     |      |      |     |   |
| isoform=cb3388_c6;full_length_coverage=1;non_full_length_coverage=0;isoform_length=2642;expected_accuracy=0.994      | isoform=cb3388_c11;full_length_coverage=1;non_full_length_coverage=0;isoform_length=3143;expected_accuracy=0.997    |                         | 1   | 2525 | 2526 | 2642 | 225 | 274  | 2875 | 299 | 1 |
| cb2471_c18/f2p0/2036                                                                                                 | gnl BL_ORD_ID 37463                                                                                                 | cb2471_c9/f2p0/2471     |     |      |      |      |     |      |      |     |   |
| isoform=cb2471_c18;full_length_coverage=2;non_full_length_coverage=0;isoform_length=2036;expected_accuracy=1.000     | isoform=cb2471_c9;full_length_coverage=2;non_full_length_coverage=0;isoform_length=2471;expected_accuracy=0.998     |                         | 1   | 1158 | 1156 | 1940 | 47  | 120  | 1688 | 247 | 1 |
| cb8564_c22390/f1p12/1923                                                                                             | gnl BL_ORD_ID 13722                                                                                                 | cb8564_c18567/f1p2/2597 |     |      |      |      |     |      |      |     |   |
| isoform=cb8564_c22390;full_length_coverage=1;non_full_length_coverage=12;isoform_length=1923;expected_accuracy=1.000 | isoform=cb8564_c18567;full_length_coverage=1;non_full_length_coverage=2;isoform_length=2597;expected_accuracy=0.995 |                         | 1   | 1078 | 1079 | 1902 | 19  | 1130 | 1773 | 259 | 7 |
| cb6065_c9/f1p0/2661                                                                                                  | gnl BL_ORD_ID 74850                                                                                                 | cb6065_c14/f1p0/3101    |     |      |      |      |     |      |      |     |   |
| isoform=cb6065_c9;full_length_coverage=1;non_full_length_coverage=0;isoform_length=2661;expected_accuracy=0.994      |                                                                                                                     |                         | 1   | 1434 | 1429 | 2643 | 26  | 146  | 1578 | 278 | 0 |
| cb188_c9/f1p0/3939                                                                                                   | gnl BL_ORD_ID 36293                                                                                                 | cb188_c6/f1p1/4010      |     |      |      |      |     |      |      |     |   |
| isoform=cb188_c9;full_length_coverage=1;non_full_length_coverage=0;isoform_length=3939;expected_accuracy=0.993       | isoform=cb188_c6;full_length_coverage=1;non_full_length_coverage=1;isoform_length=4010;expected_accuracy=0.996      |                         | 124 | 3581 | 3579 | 3939 | 1   | 346  | 3603 | 396 | 3 |
| cb8564_c72349/f1p0/3248                                                                                              | gnl BL_ORD_ID 16445                                                                                                 | cb8564_c48521/f3p0/3397 |     |      |      |      |     |      |      |     |   |
|                                                                                                                      | isoform=cb8564_c48521;full_length_coverage=3;non_full_length_coverage=0;isoform_length=3397;expected_accuracy=0.997 |                         | 1   | 2662 | 2659 | 3068 | 39  | 272  | 2883 | 329 | 2 |

|                                                                                                                                                |                                                                                                                                                                         |      |      |      |      |      |      |      |      |
|------------------------------------------------------------------------------------------------------------------------------------------------|-------------------------------------------------------------------------------------------------------------------------------------------------------------------------|------|------|------|------|------|------|------|------|
| cb750_c40/f1p0/3632<br>isoform=cb750_c40;full_length_coverage=1;non_full_length_coverage=0;isoform_length=3632;expected_accuracy=0.990         | gnl BL_ORD_ID 7348      cb750_c27/f1p1/4163<br>isoform=cb750_c27;full_length_coverage=1;non_full_length_coverage=1;isoform_length=4163;expected_accuracy=0.998          | 11   | 2164 | 2163 | 3611 | 26   | 2162 | 2719 | 4163 |
| cb560_c8/f1p0/3610<br>isoform=cb560_c8;full_length_coverage=1;non_full_length_coverage=0;isoform_length=3610;expected_accuracy=0.995           | gnl BL_ORD_ID 73553      cb560_c10/f1p0/3728                                                                                                                            | 2    | 2430 | 2431 | 3610 | 2    | 2430 | 2562 | 3742 |
| cb8564_c24185/f1p1/2695<br>isoform=cb8564_c24185;full_length_coverage=1;non_full_length_coverage=1;isoform_length=2695;expected_accuracy=0.996 | gnl BL_ORD_ID 13176      cb8564_c15957/f1p0/2838<br>isoform=cb8564_c15957;full_length_coverage=1;non_full_length_coverage=0;isoform_length=2838;expected_accuracy=0.994 | 1    | 1665 | 1664 | 2695 | 1    | 1684 | 1792 | 2817 |
| cb18773_c9/f1p0/6228                                                                                                                           | gnl BL_ORD_ID 67996      cb18773_c6/f1p1/5702                                                                                                                           | 1    | 3374 | 3373 | 5233 | 114  | 3487 | 3600 | 5460 |
| cb6339_c16/f1p1/2286<br>isoform=cb6339_c16;full_length_coverage=1;non_full_length_coverage=1;isoform_length=2286;expected_accuracy=0.997       | gnl BL_ORD_ID 4267      cb6339_c88/f27p4/2609<br>isoform=cb6339_c88;full_length_coverage=27;non_full_length_coverage=4;isoform_length=2609;expected_accuracy=0.995      | 1    | 1780 | 1776 | 2286 | 91   | 1872 | 2076 | 2586 |
| cb13753_c0/f1p0/1755                                                                                                                           | gnl BL_ORD_ID 70597      cb3759_c2/f1p0/3671                                                                                                                            | 377  | 1665 | 7    | 378  | 1910 | 3197 | 51   | 420  |
| cb3324_c10/f1p2/5646<br>isoform=cb3324_c10;full_length_coverage=1;non_full_length_coverage=2;isoform_length=5646;expected_accuracy=0.991       | gnl BL_ORD_ID 71091      cb3324_c7/f1p2/6368                                                                                                                            | 2378 | 5646 | 1    | 2380 | 3083 | 6355 | 1    | 2356 |
| cb9571_c24/f1p2/1208<br>isoform=cb9571_c24;full_length_coverage=1;non_full_                                                                    | gnl BL_ORD_ID 21300      cb9571_c2/f34p2/1543<br>isoform=cb9571_c2;full_length_coverage=34;non_full_l                                                                   | 293  | 1208 | 35   | 298  | 561  | 1477 | 20   | 283  |

|                                                                                                                                                                                                         |                                                                                                                                                                                                                                                   |     |      |      |      |      |     |      |     |
|---------------------------------------------------------------------------------------------------------------------------------------------------------------------------------------------------------|---------------------------------------------------------------------------------------------------------------------------------------------------------------------------------------------------------------------------------------------------|-----|------|------|------|------|-----|------|-----|
| length_coverage=2;isoform_length=1208;expected_accuracy=1.000<br>cb8292_c5/f2p0/1876<br>isoform=cb8292_c5;full_length_coverage=2;non_full_length_coverage=0;isoform_length=1876;expected_accuracy=0.999 | length_coverage=2;isoform_length=1543;expected_accuracy=1.000<br>gnl BL_ORD_ID 9292                      cb8292_c17/f1p0/1910<br>isoform=cb8292_c17;full_length_coverage=1;non_full_length_coverage=0;isoform_length=1910;expected_accuracy=0.998 | 234 | 1870 | 54   | 236  | 298  | 191 | 1    | 183 |
| cb7612_c7/f1p0/2393                                                                                                                                                                                     | gnl BL_ORD_ID 8785                      cb7612_c0/f1p1/2574<br>isoform=cb7612_c0;full_length_coverage=1;non_full_length_coverage=1;isoform_length=2574;expected_accuracy=0.991                                                                    | 1   | 1724 | 1722 | 2142 | 2    | 172 | 2073 | 249 |
| cb8564_c5007/f1p0/1941                                                                                                                                                                                  | gnl BL_ORD_ID 16235                      cb8564_c4984/f1p0/3665<br>isoform=cb8564_c4984;full_length_coverage=1;non_full_length_coverage=0;isoform_length=3665;expected_accuracy=1.000                                                             | 1   | 1447 | 1446 | 1713 | 1819 | 326 | 3397 | 366 |
| cb396_c42/f1p0/2343                                                                                                                                                                                     | gnl BL_ORD_ID 40201                      cb396_c30/f1p0/2423<br>isoform=cb396_c30;full_length_coverage=1;non_full_length_coverage=0;isoform_length=2423;expected_accuracy=0.996                                                                   | 101 | 1458 | 1457 | 2340 | 3    | 136 | 1539 | 242 |
| cb3211_c3/f1p1/3175<br>isoform=cb3211_c3;full_length_coverage=1;non_full_length_coverage=1;isoform_length=3175;expected_accuracy=0.998                                                                  | gnl BL_ORD_ID 70232                      cb3211_c4/f1p0/3640                                                                                                                                                                                      | 1   | 2004 | 2004 | 3125 | 134  | 214 | 2502 | 362 |
| cb8564_c1229/f1p0/4016                                                                                                                                                                                  | gnl BL_ORD_ID 12265                      cb8564_c1235/f7p1/4220<br>isoform=cb8564_c1235;full_length_coverage=7;non_full_length_coverage=1;isoform_length=4220;expected_accuracy=0.999                                                             | 109 | 2102 | 2101 | 3993 | 1    | 199 | 2164 | 405 |

|                                                                                                                                                |                                             |      |      |      |      |      |      |      |      |
|------------------------------------------------------------------------------------------------------------------------------------------------|---------------------------------------------|------|------|------|------|------|------|------|------|
| cb666_c7/f1p0/2038<br>isoform=cb666_c7;full_length_coverage=1;non_full_length_coverage=0;isoform_length=2038;expected_accuracy=0.996           | gnl BL_ORD_ID 49394 cb666_c14/f1p0/2626     | 100  | 2038 | 1    | 101  | 202  | 2140 | 2    | 102  |
| cb862_c7/f1p0/2681<br>isoform=cb862_c22;full_length_coverage=1;non_full_length_coverage=0;isoform_length=3314;expected_accuracy=0.995          | gnl BL_ORD_ID 17904 cb862_c22/f1p0/3314     | 1    | 1294 | 1294 | 2671 | 97   | 1395 | 1913 | 3314 |
| cb2907_c2/f1p1/2369<br>isoform=cb2907_c2;full_length_coverage=1;non_full_length_coverage=1;isoform_length=2369;expected_accuracy=0.991         | gnl BL_ORD_ID 38599 cb2907_c5/f1p0/3162     | 1    | 1331 | 1330 | 2369 | 18   | 1337 | 2121 | 3161 |
| cb8564_c15653/f1p4/2475<br>isoform=cb8564_c12536;full_length_coverage=1;non_full_length_coverage=0;isoform_length=2333;expected_accuracy=0.998 | gnl BL_ORD_ID 56010 cb8564_c51971/f1p0/3064 | 22   | 2293 | 2289 | 2460 | 41   | 2312 | 2531 | 2702 |
| cb8564_c12536/f1p0/2333<br>isoform=cb8564_c1;full_length_coverage=5;non_full_length_coverage=0;isoform_length=3149;expected_accuracy=1.000     | gnl BL_ORD_ID 54392 cb8564_c23489/f1p0/2469 | 248  | 2333 | 68   | 247  | 336  | 2423 | 1    | 180  |
| cb946_c1/f5p0/3149<br>isoform=cb946_c2;full_length_coverage=3;non_full_length_coverage=0;isoform_length=3333;expected_accuracy=1.000           | gnl BL_ORD_ID 19592 cb946_c2/f3p0/3333      | 1053 | 3149 | 1    | 1053 | 1206 | 3303 | 46   | 1098 |
| cb8564_c85646/f1p0/3480<br>isoform=cb5672_c16;full_length_coverage=1;non_full_length_coverage=0;isoform_length=2940;expected_accuracy=0.999    | gnl BL_ORD_ID 55920 cb8564_c48949/f1p0/4357 | 106  | 2377 | 2378 | 3030 | 21   | 2293 | 2847 | 3496 |
| cb5672_c16/f1p0/2940<br>isoform=cb5672_c6;full_length_coverage=1;non_full_length_coverage=0;isoform_length=2032;expected_accuracy=0.999        | gnl BL_ORD_ID 44913 cb5672_c6/f1p0/3840     | 1    | 2032 | 2031 | 2940 | 12   | 2044 | 2845 | 3756 |



|                                                                                                                                                                                                                                                                                                                                                                                                                                                                                                                                                                                                                                                                                                                                                                                                                                                                                                                                                             |                                                                                                                                                                                                                                                                                                                                                                                                                                                                                                                                                                                                                                                                                                                                                                               |     |      |      |      |      |      |      |     |
|-------------------------------------------------------------------------------------------------------------------------------------------------------------------------------------------------------------------------------------------------------------------------------------------------------------------------------------------------------------------------------------------------------------------------------------------------------------------------------------------------------------------------------------------------------------------------------------------------------------------------------------------------------------------------------------------------------------------------------------------------------------------------------------------------------------------------------------------------------------------------------------------------------------------------------------------------------------|-------------------------------------------------------------------------------------------------------------------------------------------------------------------------------------------------------------------------------------------------------------------------------------------------------------------------------------------------------------------------------------------------------------------------------------------------------------------------------------------------------------------------------------------------------------------------------------------------------------------------------------------------------------------------------------------------------------------------------------------------------------------------------|-----|------|------|------|------|------|------|-----|
| length_coverage=0;isoform_length=2940;expected_accuracy=0.999<br>cb5516_c26/f1p0/3029<br>isoform=cb5516_c26;full_length_coverage=1;non_full_length_coverage=0;isoform_length=3029;expected_accuracy=1.000<br>cb187_c5/f1p0/3727<br>isoform=cb187_c5;full_length_coverage=1;non_full_length_coverage=0;isoform_length=3727;expected_accuracy=0.996<br>cb8564_c12355/f1p9/2685<br>isoform=cb8564_c12355;full_length_coverage=1;non_full_length_coverage=9;isoform_length=2685;expected_accuracy=0.999<br>cb8564_c46247/f1p1/3336<br>isoform=cb8564_c46247;full_length_coverage=1;non_full_length_coverage=1;isoform_length=3336;expected_accuracy=0.992<br>cb8564_c178335/f1p2/3430<br>isoform=cb8564_c178335;full_length_coverage=1;non_full_length_coverage=2;isoform_length=3430;expected_accuracy=0.998<br>cb8564_c36689/f1p1/2368<br>isoform=cb8564_c36689;full_length_coverage=1;non_full_length_coverage=1;isoform_length=2368;expected_accuracy=0.991 | length_coverage=0;isoform_length=3840;expected_accuracy=0.994<br>gnl BL_ORD_ID 46454                      cb5516_c53/f1p0/3210<br>isoform=cb5516_c53;full_length_coverage=1;non_full_length_coverage=0;isoform_length=3210;expected_accuracy=0.994<br>gnl BL_ORD_ID 34575                      cb187_c6/f9p1/4066<br>isoform=cb187_c6;full_length_coverage=9;non_full_length_coverage=1;isoform_length=4066;expected_accuracy=1.000<br>gnl BL_ORD_ID 56381   cb8564_c75626/f1p2/3199<br>gnl BL_ORD_ID 66137   cb18054_c3/f1p0/5284<br>gnl BL_ORD_ID 9995                      cb8564_c111409/f2p0/3661<br>isoform=cb8564_c111409;full_length_coverage=2;non_full_length_coverage=0;isoform_length=3661;expected_accuracy=0.999<br>gnl BL_ORD_ID 61972   cb12931_c30/f1p0/5903 | 10  | 2327 | 2322 | 2968 | 114  | 243  | 2561 | 321 |
|                                                                                                                                                                                                                                                                                                                                                                                                                                                                                                                                                                                                                                                                                                                                                                                                                                                                                                                                                             |                                                                                                                                                                                                                                                                                                                                                                                                                                                                                                                                                                                                                                                                                                                                                                               | 152 | 3726 | 1    | 151  | 492  | 406  | 98   | 248 |
|                                                                                                                                                                                                                                                                                                                                                                                                                                                                                                                                                                                                                                                                                                                                                                                                                                                                                                                                                             |                                                                                                                                                                                                                                                                                                                                                                                                                                                                                                                                                                                                                                                                                                                                                                               | 1   | 2141 | 2139 | 2685 | 4    | 2116 | 2611 | 315 |
|                                                                                                                                                                                                                                                                                                                                                                                                                                                                                                                                                                                                                                                                                                                                                                                                                                                                                                                                                             |                                                                                                                                                                                                                                                                                                                                                                                                                                                                                                                                                                                                                                                                                                                                                                               | 10  | 2311 | 2309 | 3286 | 1148 | 344  | 4305 | 528 |
|                                                                                                                                                                                                                                                                                                                                                                                                                                                                                                                                                                                                                                                                                                                                                                                                                                                                                                                                                             |                                                                                                                                                                                                                                                                                                                                                                                                                                                                                                                                                                                                                                                                                                                                                                               | 1   | 2863 | 2861 | 3429 | 1    | 286  | 3093 | 366 |
|                                                                                                                                                                                                                                                                                                                                                                                                                                                                                                                                                                                                                                                                                                                                                                                                                                                                                                                                                             |                                                                                                                                                                                                                                                                                                                                                                                                                                                                                                                                                                                                                                                                                                                                                                               | 1   | 1709 | 1706 | 2368 | 1    | 170  | 2200 | 286 |
|                                                                                                                                                                                                                                                                                                                                                                                                                                                                                                                                                                                                                                                                                                                                                                                                                                                                                                                                                             |                                                                                                                                                                                                                                                                                                                                                                                                                                                                                                                                                                                                                                                                                                                                                                               |     |      |      |      |      | 5    |      | 0   |
|                                                                                                                                                                                                                                                                                                                                                                                                                                                                                                                                                                                                                                                                                                                                                                                                                                                                                                                                                             |                                                                                                                                                                                                                                                                                                                                                                                                                                                                                                                                                                                                                                                                                                                                                                               |     |      |      |      |      | 6    |      |     |
|                                                                                                                                                                                                                                                                                                                                                                                                                                                                                                                                                                                                                                                                                                                                                                                                                                                                                                                                                             |                                                                                                                                                                                                                                                                                                                                                                                                                                                                                                                                                                                                                                                                                                                                                                               |     |      |      |      |      | 1    |      | 4   |
|                                                                                                                                                                                                                                                                                                                                                                                                                                                                                                                                                                                                                                                                                                                                                                                                                                                                                                                                                             |                                                                                                                                                                                                                                                                                                                                                                                                                                                                                                                                                                                                                                                                                                                                                                               |     |      |      |      |      | 3    |      | 1   |
|                                                                                                                                                                                                                                                                                                                                                                                                                                                                                                                                                                                                                                                                                                                                                                                                                                                                                                                                                             |                                                                                                                                                                                                                                                                                                                                                                                                                                                                                                                                                                                                                                                                                                                                                                               |     |      |      |      |      | 1    |      | 4   |

|                                                                                                                                                |                                                                                                                                                                           |     |      |      |      |      |          |      |          |
|------------------------------------------------------------------------------------------------------------------------------------------------|---------------------------------------------------------------------------------------------------------------------------------------------------------------------------|-----|------|------|------|------|----------|------|----------|
| cb8564_c37220/f1p2/4071<br>isoform=cb8564_c37220;full_length_coverage=1;non_full_length_coverage=2;isoform_length=4071;expected_accuracy=0.994 | gnl BL_ORD_ID 14942      cb8564_c34188/f2p3/4546<br>isoform=cb8564_c34188;full_length_coverage=2;non_full_length_coverage=3;isoform_length=4546;expected_accuracy=1.000   | 104 | 3277 | 3273 | 4071 | 207  | 338<br>2 | 3647 | 444<br>6 |
| cb373_c39/f1p0/4415                                                                                                                            | gnl BL_ORD_ID 70839      cb373_c37/f1p0/4690                                                                                                                              | 16  | 3355 | 3356 | 3763 | 11   | 335<br>2 | 3458 | 386<br>5 |
| cb8564_c49821/f1p1/2905                                                                                                                        | gnl BL_ORD_ID 13472      cb8564_c182192/f1p6/3150<br>isoform=cb8564_c182192;full_length_coverage=1;non_full_length_coverage=6;isoform_length=3150;expected_accuracy=0.995 | 1   | 1544 | 1541 | 2881 | 19   | 157<br>0 | 1788 | 313<br>0 |
| cb7400_c0/f3p1/2300<br>isoform=cb7400_c0;full_length_coverage=3;non_full_length_coverage=1;isoform_length=2300;expected_accuracy=1.000         | gnl BL_ORD_ID 51190      cb7400_c14/f1p0/2608                                                                                                                             | 1   | 1661 | 1662 | 2300 | 1    | 165<br>8 | 1798 | 242<br>5 |
| cb3575_c3/f2p1/3187<br>isoform=cb3575_c3;full_length_coverage=2;non_full_length_coverage=1;isoform_length=3187;expected_accuracy=1.000         | gnl BL_ORD_ID 39142      cb3575_c4/f1p2/3595<br>isoform=cb3575_c4;full_length_coverage=1;non_full_length_coverage=2;isoform_length=3595;expected_accuracy=0.992           | 20  | 2555 | 2555 | 3158 | 1    | 252<br>8 | 2993 | 359<br>5 |
| cb8564_c18901/f1p1/2269                                                                                                                        | gnl BL_ORD_ID 11254      cb8564_c13282/f1p2/2892<br>isoform=cb8564_c13282;full_length_coverage=1;non_full_length_coverage=2;isoform_length=2892;expected_accuracy=0.994   | 1   | 1836 | 1835 | 2180 | 7    | 184<br>2 | 2548 | 289<br>2 |
| cb9472_c3/f1p0/1395<br>isoform=cb9472_c3;full_length_coverage=1;non_full_length_coverage=0;isoform_length=1395;expected_accuracy=0.998         | gnl BL_ORD_ID 58745      cb9472_c0/f1p0/2145                                                                                                                              | 388 | 1395 | 8    | 390  | 1066 | 207<br>3 | 4    | 388      |

|                                                                                                                                                  |                                                                                                                                                                             |    |      |      |      |      |      |      |      |
|--------------------------------------------------------------------------------------------------------------------------------------------------|-----------------------------------------------------------------------------------------------------------------------------------------------------------------------------|----|------|------|------|------|------|------|------|
| cb8564_c111706/f1p0/2253                                                                                                                         | gnl BL_ORD_ID 10765      cb8564_c108620/f6p2/2639<br>isoform=cb8564_c108620;full_length_coverage=6;non_full_length_coverage=2;isoform_length=2639;expected_accuracy=1.000   | 1  | 1681 | 1678 | 2175 | 168  | 1848 | 2139 | 2633 |
| cb10850_c6/f1p0/1579                                                                                                                             | gnl BL_ORD_ID 3040      cb10850_c2/f1p0/2696<br>isoform=cb10850_c2;full_length_coverage=1;non_full_length_coverage=0;isoform_length=2696;expected_accuracy=0.995            | 1  | 1137 | 1138 | 1415 | 1114 | 2250 | 2366 | 2644 |
| cb8564_c178999/f1p0/2222<br>isoform=cb8564_c178999;full_length_coverage=1;non_full_length_coverage=0;isoform_length=2222;expected_accuracy=0.994 | gnl BL_ORD_ID 15401      cb8564_c34720/f1p3/3220<br>isoform=cb8564_c34720;full_length_coverage=1;non_full_length_coverage=3;isoform_length=3220;expected_accuracy=0.992     | 10 | 1778 | 1773 | 2221 | 10   | 1776 | 2745 | 3220 |
| cb8564_c13789/f1p1/3323                                                                                                                          | gnl BL_ORD_ID 55761      cb8564_c24976/f1p1/3685                                                                                                                            | 2  | 2821 | 2820 | 3333 | 55   | 2874 | 3187 | 3701 |
| cb5271_c5/f1p2/2317                                                                                                                              | gnl BL_ORD_ID 45450      cb5271_c4/f1p2/3138<br>isoform=cb5271_c4;full_length_coverage=1;non_full_length_coverage=2;isoform_length=3138;expected_accuracy=0.995             | 1  | 1283 | 1279 | 2316 | 1    | 1283 | 2101 | 3138 |
| cb8564_c49821/f1p1/2905                                                                                                                          | gnl BL_ORD_ID 15357      cb8564_c44284/f4p1/3133<br>isoform=cb8564_c44284;full_length_coverage=4;non_full_length_coverage=1;isoform_length=3133;expected_accuracy=1.000     | 1  | 1544 | 1541 | 2881 | 9    | 1575 | 1793 | 3133 |
| cb8564_c15653/f1p4/2475                                                                                                                          | gnl BL_ORD_ID 13065      cb8564_c157334/f1p21/2777<br>isoform=cb8564_c157334;full_length_coverage=1;non_full_length_coverage=21;isoform_length=2777;expected_accuracy=0.995 | 20 | 2293 | 2289 | 2480 | 42   | 2316 | 2535 | 2727 |

|                                                                                                                                                  |                                                                                                                                                                          |      |      |      |      |      |      |      |      |
|--------------------------------------------------------------------------------------------------------------------------------------------------|--------------------------------------------------------------------------------------------------------------------------------------------------------------------------|------|------|------|------|------|------|------|------|
| cb8564_c112971/f1p0/2064<br>isoform=cb8564_c112971;full_length_coverage=1;non_full_length_coverage=0;isoform_length=2064;expected_accuracy=0.991 | gnl BL_ORD_ID 9281      cb8564_c119279/f1p0/2203<br>isoform=cb8564_c119279;full_length_coverage=1;non_full_length_coverage=0;isoform_length=2203;expected_accuracy=0.996 | 1    | 1422 | 1422 | 2062 | 2    | 1420 | 1568 | 2203 |
| cb2671_c18/f1p0/2982<br>isoform=cb2671_c18;full_length_coverage=1;non_full_length_coverage=0;isoform_length=2982;expected_accuracy=0.995         | gnl BL_ORD_ID 68701      cb2671_c38/f1p0/3750                                                                                                                            | 1138 | 2959 | 102  | 1141 | 1929 | 3755 | 1    | 1040 |
| cb8564_c39136/f1p0/3036<br>isoform=cb8564_c39136;full_length_coverage=1;non_full_length_coverage=0;isoform_length=3036;expected_accuracy=0.998   | gnl BL_ORD_ID 55211      cb8564_c35547/f1p0/3745                                                                                                                         | 1    | 2089 | 2085 | 3036 | 9    | 2105 | 2232 | 3184 |
| cb18456_c1958/f1p1/1247<br>isoform=cb18456_c1958;full_length_coverage=1;non_full_length_coverage=1;isoform_length=1247;expected_accuracy=0.998   | gnl BL_ORD_ID 36413      cb18456_c1924/f1p2/1435<br>isoform=cb18456_c1924;full_length_coverage=1;non_full_length_coverage=2;isoform_length=1435;expected_accuracy=1.000  | 9    | 781  | 779  | 1217 | 5    | 777  | 878  | 1314 |
| cb8564_c34553/f1p0/3407                                                                                                                          | gnl BL_ORD_ID 14394      cb8564_c39181/f2p0/3796<br>isoform=cb8564_c39181;full_length_coverage=2;non_full_length_coverage=0;isoform_length=3796;expected_accuracy=0.997  | 26   | 2805 | 2804 | 3212 | 20   | 2793 | 3369 | 3796 |
| cb3482_c32/f1p0/1683<br>isoform=cb3482_c32;full_length_coverage=1;non_full_length_coverage=0;isoform_length=1683;expected_accuracy=1.000         | gnl BL_ORD_ID 41029      cb3482_c38/f13p2/2110<br>isoform=cb3482_c38;full_length_coverage=13;non_full_length_coverage=2;isoform_length=2110;expected_accuracy=1.000      | 1    | 1586 | 1581 | 1683 | 129  | 1729 | 2008 | 2110 |
| cb14220_c21/f1p1/5537                                                                                                                            | gnl BL_ORD_ID 25176      cb14220_c10/f1p1/6717<br>isoform=cb14220_c10;full_length_coverage=1;non_full                                                                    | 1    | 4570 | 4569 | 5549 | 1002 | 5554 | 5675 | 6650 |

|                          |                                                                                                                                                                                                                                                                                                                    |     |      |      |      |      |      |      |     |   |
|--------------------------|--------------------------------------------------------------------------------------------------------------------------------------------------------------------------------------------------------------------------------------------------------------------------------------------------------------------|-----|------|------|------|------|------|------|-----|---|
| cb1960_c41/f1p1/2517     | <p>_length_coverage=1;isoform_length=6717;expected_accuracy=0.993</p> <p>gnl BL_ORD_ID 36150                      cb1960_c28/f1p0/3094</p> <p>isoform=cb1960_c28;full_length_coverage=1;non_full_length_coverage=0;isoform_length=3094;expected_accuracy=0.995</p>                                                 | 1   | 2123 | 2120 | 2503 | 192  | 2311 | 2708 | 309 | 1 |
| cb7116_c11/f1p3/2162     | <p>gnl BL_ORD_ID 5769                      cb7116_c4/f2p0/2694</p> <p>isoform=cb7116_c11;full_length_coverage=11;non_full_length_coverage=3;isoform_length=2162;expected_accuracy=1.000</p> <p>isoform=cb7116_c4;full_length_coverage=2;non_full_length_coverage=0;isoform_length=2694;expected_accuracy=0.997</p> | 455 | 2109 | 8    | 460  | 1002 | 2659 | 2    | 454 |   |
| cb18456_c1748/f1p0/1180  | gnl BL_ORD_ID 69242   cb18456_c1755/f1p0/1422                                                                                                                                                                                                                                                                      | 243 | 1188 | 6    | 248  | 382  | 1327 | 2    | 244 |   |
| cb5565_c66/f1p0/2756     | <p>gnl BL_ORD_ID 46929                      cb5565_c63/f1p0/3234</p> <p>isoform=cb5565_c63;full_length_coverage=1;non_full_length_coverage=0;isoform_length=3234;expected_accuracy=0.997</p>                                                                                                                       | 1   | 2174 | 2172 | 2745 | 7    | 2176 | 2661 | 323 | 4 |
| cb8564_c109730/f3p0/2853 | gnl BL_ORD_ID 53093   cb8564_c116144/f1p0/3080                                                                                                                                                                                                                                                                     | 1   | 2737 | 2737 | 2847 | 64   | 2796 | 2907 | 301 | 8 |
| cb8564_c84130/f1p2/3574  | gnl BL_ORD_ID 55537   cb8564_c44585/f1p0/3901                                                                                                                                                                                                                                                                      | 125 | 3573 | 1    | 127  | 379  | 3822 | 81   | 206 |   |
| cb1016_c0/f7p1/1298      | gnl BL_ORD_ID 47223   cb1016_c4/f1p1/2801                                                                                                                                                                                                                                                                          | 1   | 1042 | 1041 | 1289 | 67   | 1106 | 2409 | 267 | 5 |

---

|                                                                                                                   |                                                                                                                    |                        |     |      |      |      |      |      |      |      |  |
|-------------------------------------------------------------------------------------------------------------------|--------------------------------------------------------------------------------------------------------------------|------------------------|-----|------|------|------|------|------|------|------|--|
| ngth_coverage=1;isoform_length=1298;expected_accuracy=1.000                                                       |                                                                                                                    |                        |     |      |      |      |      |      |      |      |  |
| cb10054_c49/f1p1/1123                                                                                             | gnl BL_ORD_ID 2392                                                                                                 | cb10054_c55/f2p0/1317  |     |      |      |      |      |      |      |      |  |
| isoform=cb10054_c49;full_length_coverage=1;non_full_length_coverage=1;isoform_length=1123;expected_accuracy=1.000 | isoform=cb10054_c55;full_length_coverage=2;non_full_length_coverage=0;isoform_length=1317;expected_accuracy=0.995  |                        | 258 | 1120 | 6    | 262  | 458  | 1317 | 4    | 273  |  |
| cb6277_c19/f1p1/2357                                                                                              | gnl BL_ORD_ID 49577                                                                                                | cb6277_c13/f1p0/2679   |     |      |      |      |      |      |      |      |  |
| isoform=cb6277_c19;full_length_coverage=1;non_full_length_coverage=1;isoform_length=2357;expected_accuracy=0.995  |                                                                                                                    |                        | 1   | 1183 | 1183 | 2342 | 26   | 1208 | 1514 | 2673 |  |
| cb3362_c27/f1p0/2905                                                                                              | gnl BL_ORD_ID 39591                                                                                                | cb3362_c29/f1p0/3618   |     |      |      |      |      |      |      |      |  |
| isoform=cb3362_c27;full_length_coverage=1;non_full_length_coverage=0;isoform_length=2905;expected_accuracy=0.995  | isoform=cb3362_c29;full_length_coverage=1;non_full_length_coverage=0;isoform_length=3618;expected_accuracy=0.992   |                        | 1   | 1996 | 1997 | 2905 | 79   | 2075 | 2640 | 3550 |  |
| cb7023_c6/f1p0/1630                                                                                               | gnl BL_ORD_ID 3663                                                                                                 | cb7023_c3/f1p1/2449    |     |      |      |      |      |      |      |      |  |
|                                                                                                                   | isoform=cb7023_c3;full_length_coverage=1;non_full_length_coverage=1;isoform_length=2449;expected_accuracy=0.995    |                        | 129 | 1564 | 1    | 129  | 1013 | 2449 | 19   | 147  |  |
| cb8564_c13652/f1p0/2664                                                                                           | gnl BL_ORD_ID 18458                                                                                                | cb8564_c9882/f2p0/2918 |     |      |      |      |      |      |      |      |  |
|                                                                                                                   | isoform=cb8564_c9882;full_length_coverage=2;non_full_length_coverage=0;isoform_length=2918;expected_accuracy=0.999 |                        | 1   | 1476 | 1475 | 2664 | 22   | 1498 | 1636 | 2809 |  |
| cb3263_c5/f1p0/3305                                                                                               | gnl BL_ORD_ID 39132                                                                                                | cb3263_c3/f1p0/3378    |     |      |      |      |      |      |      |      |  |
|                                                                                                                   | isoform=cb3263_c3;full_length_coverage=1;non_full_length_coverage=0;isoform_length=3378;expected_accuracy=0.997    |                        | 1   | 2752 | 2748 | 3144 | 36   | 2785 | 2982 | 3378 |  |

---

|                                                                                                                                                  |                                                                                                                                                                    |     |      |      |      |     |      |      |      |
|--------------------------------------------------------------------------------------------------------------------------------------------------|--------------------------------------------------------------------------------------------------------------------------------------------------------------------|-----|------|------|------|-----|------|------|------|
| cb7736_c4/f1p0/3571<br>isoform=cb7736_c4;full_length_coverage=1;non_full_length_coverage=0;isoform_length=3571;expected_accuracy=0.996           | gnl BL_ORD_ID 50678 cb7736_c3/f1p0/4173                                                                                                                            | 1   | 2535 | 2536 | 3568 | 1   | 2527 | 3121 | 4150 |
| cb9694_c11/f1p0/1693                                                                                                                             | gnl BL_ORD_ID 59911 cb9694_c4/f1p0/1868                                                                                                                            | 450 | 1642 | 52   | 454  | 564 | 1756 | 1    | 403  |
| cb4665_c2/f2p0/2737<br>isoform=cb4665_c2;full_length_coverage=2;non_full_length_coverage=0;isoform_length=2737;expected_accuracy=1.000           | gnl BL_ORD_ID 72831 cb4665_c3/f1p0/3053                                                                                                                            | 1   | 1885 | 1885 | 2729 | 21  | 1905 | 2155 | 2999 |
| cb8564_c154694/f2p9/3322<br>isoform=cb8564_c154694;full_length_coverage=2;non_full_length_coverage=9;isoform_length=3322;expected_accuracy=1.000 | gnl BL_ORD_ID 15223 cb8564_c35037/f1p0/3377<br>isoform=cb8564_c35037;full_length_coverage=1;non_full_length_coverage=0;isoform_length=3377;expected_accuracy=0.996 | 1   | 2757 | 2755 | 3264 | 1   | 2761 | 2866 | 3377 |
| cb14220_c21/f1p1/5537                                                                                                                            | gnl BL_ORD_ID 63131 cb14220_c4/f1p1/7240                                                                                                                           | 1   | 4570 | 4569 | 5549 | 905 | 5474 | 5597 | 6577 |
| cb8564_c72680/f1p0/2685                                                                                                                          | gnl BL_ORD_ID 57123 cb8564_c84015/f1p0/3207                                                                                                                        | 12  | 1735 | 1730 | 2636 | 3   | 1726 | 1905 | 2811 |
| cb8564_c23232/f1p3/2540                                                                                                                          | gnl BL_ORD_ID 55935 cb8564_c49443/f1p0/2984                                                                                                                        | 16  | 2172 | 2167 | 2518 | 39  | 2192 | 2294 | 2645 |
| cb6646_c1/f3p1/2483<br>isoform=cb6646_c1;full_length_coverage=3;non_full_length_coverage=1;isoform_length=2483;expected_accuracy=1.000           | gnl BL_ORD_ID 4220 cb6646_c6/f1p0/2802<br>isoform=cb6646_c6;full_length_coverage=1;non_full_length_coverage=0;isoform_length=2802;expected_accuracy=0.994          | 1   | 2050 | 2047 | 2416 | 3   | 2050 | 2433 | 2802 |
| cb8564_c40764/f1p0/2563<br>isoform=cb8564_c40764;full_length_coverage=1;non_f                                                                    | gnl BL_ORD_ID 54438 cb8564_c46124/f1p0/3383                                                                                                                        | 1   | 2167 | 2162 | 2563 | 151 | 2315 | 2522 | 2927 |

|                                                                                                                      |                                                                                                                                                                           |      |      |      |      |      |      |      |      |  |
|----------------------------------------------------------------------------------------------------------------------|---------------------------------------------------------------------------------------------------------------------------------------------------------------------------|------|------|------|------|------|------|------|------|--|
| ull_length_coverage=0;isoform_length=2563;expected_accuracy=0.997                                                    |                                                                                                                                                                           |      |      |      |      |      |      |      |      |  |
| cb1490_c11/f1p1/3876                                                                                                 | gnl BL_ORD_ID 30687      cb1490_c2/f1p1/4303<br>isoform=cb1490_c2;full_length_coverage=1;non_full_length_coverage=1;isoform_length=4303;expected_accuracy=0.994           | 20   | 2559 | 2556 | 3884 | 6    | 2550 | 2942 | 4267 |  |
| cb8564_c40598/f1p4/3119                                                                                              | gnl BL_ORD_ID 14471      cb8564_c34518/f1p0/3136<br>isoform=cb8564_c34518;full_length_coverage=1;non_full_length_coverage=0;isoform_length=3136;expected_accuracy=0.991   | 1    | 2732 | 2729 | 3053 | 1    | 2698 | 2818 | 3136 |  |
| cb8564_c158845/f2p1/2551                                                                                             |                                                                                                                                                                           |      |      |      |      |      |      |      |      |  |
| isoform=cb8564_c158845;full_length_coverage=2;non_full_length_coverage=1;isoform_length=2551;expected_accuracy=0.995 | gnl BL_ORD_ID 57744      cb8564_c79518/f1p0/2771                                                                                                                          | 1    | 1901 | 1897 | 2546 | 16   | 1900 | 2062 | 2689 |  |
| cb1535_c10/f1p0/3272                                                                                                 | gnl BL_ORD_ID 63719      cb1535_c3/f1p0/4275                                                                                                                              | 1250 | 3241 | 10   | 1255 | 2187 | 4187 | 1    | 1249 |  |
| cb8564_c121641/f1p0/2089                                                                                             | gnl BL_ORD_ID 12681      cb8564_c146083/f6p3/2197<br>isoform=cb8564_c146083;full_length_coverage=6;non_full_length_coverage=3;isoform_length=2197;expected_accuracy=1.000 | 1    | 1526 | 1525 | 1884 | 23   | 1574 | 1789 | 2148 |  |
| cb8564_c43119/f1p4/3194                                                                                              |                                                                                                                                                                           |      |      |      |      |      |      |      |      |  |
| isoform=cb8564_c43119;full_length_coverage=1;non_full_length_coverage=4;isoform_length=3194;expected_accuracy=0.995  | gnl BL_ORD_ID 55817      cb8564_c40942/f1p0/3608                                                                                                                          | 12   | 1671 | 1668 | 3150 | 20   | 1669 | 1811 | 3278 |  |
| cb626_c91/f1p0/2043                                                                                                  |                                                                                                                                                                           |      |      |      |      |      |      |      |      |  |
| isoform=cb626_c91;full_length_coverage=1;non_full_length_coverage=1;isoform_length=2043;expected_accuracy=0.995      | gnl BL_ORD_ID 4060      cb626_c17/f1p0/4935<br>isoform=cb626_c17;full_length_coverage=1;non_full_length_coverage=1;isoform_length=4935;expected_accuracy=0.995            | 1    | 1397 | 1397 | 1964 | 2231 | 3629 | 4370 | 4935 |  |



|                                                                                                                                                                                                                                                                                                                                                                                                                                                                                                                                                                                                                                                                                                                                                                                                                                                                                                                                               |                                                                                                                                                                                                                                                                                                                                                                                                                                                                                                                                                                               |                                |                                              |                                         |                                            |                                       |                                         |                                         |                                             |
|-----------------------------------------------------------------------------------------------------------------------------------------------------------------------------------------------------------------------------------------------------------------------------------------------------------------------------------------------------------------------------------------------------------------------------------------------------------------------------------------------------------------------------------------------------------------------------------------------------------------------------------------------------------------------------------------------------------------------------------------------------------------------------------------------------------------------------------------------------------------------------------------------------------------------------------------------|-------------------------------------------------------------------------------------------------------------------------------------------------------------------------------------------------------------------------------------------------------------------------------------------------------------------------------------------------------------------------------------------------------------------------------------------------------------------------------------------------------------------------------------------------------------------------------|--------------------------------|----------------------------------------------|-----------------------------------------|--------------------------------------------|---------------------------------------|-----------------------------------------|-----------------------------------------|---------------------------------------------|
| ngth_coverage=0;isoform_length=2043;expected_accuracy=0.997<br>cb4163_c9/f1p0/2277<br>isoform=cb4163_c9;full_length_coverage=1;non_full_length_coverage=0;isoform_length=2277;expected_accuracy=0.995<br>cb2528_c0/f4p1/1435<br>isoform=cb2528_c0;full_length_coverage=4;non_full_length_coverage=1;isoform_length=1435;expected_accuracy=1.000<br>cb7969_c11/f1p0/1950<br>isoform=cb7969_c11;full_length_coverage=1;non_full_length_coverage=0;isoform_length=1950;expected_accuracy=0.992<br>cb8564_c186356/f1p0/2744<br>isoform=cb8564_c186356;full_length_coverage=1;non_full_length_coverage=0;isoform_length=2744;expected_accuracy=0.998<br>cb8564_c36056/f1p0/2652<br>isoform=cb8564_c36056;full_length_coverage=1;non_full_length_coverage=0;isoform_length=2652;expected_accuracy=0.999<br>cb4528_c38/f2p0/1640<br>isoform=cb4528_c38;full_length_coverage=2;non_full_length_coverage=0;isoform_length=1640;expected_accuracy=1.000 | ngth_coverage=0;isoform_length=4935;expected_accuracy=0.993<br>gnl BL_ORD_ID 72300 cb4163_c14/f1p0/3022<br>gnl BL_ORD_ID 37491 cb2528_c1/f1p1/3892<br>isoform=cb2528_c1;full_length_coverage=1;non_full_length_coverage=1;isoform_length=3892;expected_accuracy=1.000<br>gnl BL_ORD_ID 50803 cb7969_c22/f1p0/2368<br>gnl BL_ORD_ID 61972 cb12931_c30/f1p0/5903<br>gnl BL_ORD_ID 55585 cb8564_c45904/f1p5/3439<br>gnl BL_ORD_ID 42033 cb4528_c16/f1p0/2037<br>isoform=cb4528_c16;full_length_coverage=1;non_full_length_coverage=0;isoform_length=2037;expected_accuracy=0.993 | 1<br>530<br>1<br>1<br>248<br>1 | 1952<br>1434<br>1409<br>1396<br>2652<br>1497 | 1948<br>64<br>1405<br>1393<br>1<br>1495 | 2205<br>534<br>1931<br>2744<br>251<br>1616 | 607<br>2988<br>101<br>1<br>456<br>121 | 254<br>389<br>1511<br>139<br>286<br>161 | 2708<br>1<br>1756<br>1514<br>60<br>1919 | 297<br>3<br>471<br>228<br>286<br>312<br>203 |
|-----------------------------------------------------------------------------------------------------------------------------------------------------------------------------------------------------------------------------------------------------------------------------------------------------------------------------------------------------------------------------------------------------------------------------------------------------------------------------------------------------------------------------------------------------------------------------------------------------------------------------------------------------------------------------------------------------------------------------------------------------------------------------------------------------------------------------------------------------------------------------------------------------------------------------------------------|-------------------------------------------------------------------------------------------------------------------------------------------------------------------------------------------------------------------------------------------------------------------------------------------------------------------------------------------------------------------------------------------------------------------------------------------------------------------------------------------------------------------------------------------------------------------------------|--------------------------------|----------------------------------------------|-----------------------------------------|--------------------------------------------|---------------------------------------|-----------------------------------------|-----------------------------------------|---------------------------------------------|

|                                                                                                                                                |                                                                                                                                            |                         |      |      |      |      |      |      |      |      |
|------------------------------------------------------------------------------------------------------------------------------------------------|--------------------------------------------------------------------------------------------------------------------------------------------|-------------------------|------|------|------|------|------|------|------|------|
| cb8564_c53418/f1p0/2602<br>isoform=cb8564_c53418;full_length_coverage=1;non_full_length_coverage=0;isoform_length=2602;expected_accuracy=0.991 | gnl BL_ORD_ID 13571<br>isoform=cb8564_c20949;full_length_coverage=2;non_full_length_coverage=0;isoform_length=2862;expected_accuracy=0.997 | cb8564_c20949/f2p0/2862 | 1163 | 2602 | 1    | 1168 | 1417 | 2859 | 150  | 1316 |
| cb1119_c16/f1p0/2494                                                                                                                           | gnl BL_ORD_ID 2754<br>isoform=cb1119_c18;full_length_coverage=1;non_full_length_coverage=0;isoform_length=2556;expected_accuracy=0.997     | cb1119_c18/f1p0/2556    | 262  | 2478 | 54   | 261  | 337  | 2556 | 1    | 208  |
| cb8564_c36731/f1p2/2761                                                                                                                        | gnl BL_ORD_ID 15038<br>isoform=cb8564_c39136;full_length_coverage=1;non_full_length_coverage=0;isoform_length=3036;expected_accuracy=0.998 | cb8564_c39136/f1p0/3036 | 1    | 1977 | 1972 | 2738 | 1    | 1973 | 2271 | 3036 |
| cb7940_c54/f1p1/1719<br>isoform=cb7940_c54;full_length_coverage=1;non_full_length_coverage=1;isoform_length=1719;expected_accuracy=0.997       | gnl BL_ORD_ID 7312<br>isoform=cb7940_c49;full_length_coverage=1;non_full_length_coverage=1;isoform_length=1935;expected_accuracy=0.995     | cb7940_c49/f1p1/1935    | 10   | 1366 | 1363 | 1719 | 1    | 1372 | 1571 | 1927 |
| cb8564_c37390/f1p0/2683<br>isoform=cb8564_c37390;full_length_coverage=1;non_full_length_coverage=0;isoform_length=2683;expected_accuracy=1.000 | gnl BL_ORD_ID 15197<br>isoform=cb8564_c43963;full_length_coverage=9;non_full_length_coverage=0;isoform_length=3230;expected_accuracy=0.993 | cb8564_c43963/f9p0/3230 | 265  | 2683 | 1    | 267  | 707  | 3152 | 1    | 258  |
| cb2084_c3/f2p0/2121<br>isoform=cb2084_c3;full_length_coverage=2;non_full_length_coverage=0;isoform_length=2121;expected_accuracy=0.997         | gnl BL_ORD_ID 35414<br>isoform=cb2084_c12;full_length_coverage=1;non_full_length_coverage=0;isoform_length=3016;expected_accuracy=0.999    | cb2084_c12/f1p0/3016    | 1    | 1586 | 1585 | 2094 | 3    | 1588 | 2506 | 3016 |
| cb3163_c12/f1p0/2539<br>isoform=cb3163_c12;full_length_coverage=1;non_full_length_coverage=0;isoform_length=2539;expected_accuracy=0.999       | gnl BL_ORD_ID 37284<br>isoform=cb3163_c1;full_length_coverage=5;non_full_length_coverage=0;isoform_length=2811;expected_accuracy=0.999     | cb3163_c1/f5p1/2811     | 1    | 1656 | 1654 | 2539 | 76   | 1731 | 1854 | 2739 |

|                                                                                                                                          |                                                                                                                                                              |      |      |      |      |      |      |      |      |
|------------------------------------------------------------------------------------------------------------------------------------------|--------------------------------------------------------------------------------------------------------------------------------------------------------------|------|------|------|------|------|------|------|------|
| length_coverage=0;isoform_length=2539;expected_accuracy=0.994<br>cb2770_c36/f1p0/3443                                                    | length_coverage=1;isoform_length=2811;expected_accuracy=0.998<br>gnl BL_ORD_ID 71945 cb4543_c1/f1p0/3821                                                     | 123  | 2661 | 2662 | 3239 | 3322 | 767  | 659  | 81   |
| cb2707_c24/f1p0/2640                                                                                                                     | gnl BL_ORD_ID 36722 cb2707_c55/f1p0/3422<br>isoform=cb2707_c55;full_length_coverage=1;non_full_length_coverage=0;isoform_length=3422;expected_accuracy=0.995 | 21   | 2430 | 2425 | 2649 | 1    | 2405 | 2913 | 3137 |
| cb10736_c0/f1p0/1267<br>isoform=cb10736_c0;full_length_coverage=1;non_full_length_coverage=0;isoform_length=1267;expected_accuracy=0.992 | gnl BL_ORD_ID 48809 cb10736_c1/f1p0/3095                                                                                                                     | 147  | 1266 | 17   | 147  | 1931 | 3051 | 2    | 132  |
| cb4452_c2/f3p0/1957<br>isoform=cb4452_c2;full_length_coverage=3;non_full_length_coverage=0;isoform_length=1957;expected_accuracy=1.000   | gnl BL_ORD_ID 42359 cb4452_c4/f1p0/2965<br>isoform=cb4452_c4;full_length_coverage=1;non_full_length_coverage=0;isoform_length=2965;expected_accuracy=0.995   | 1    | 1509 | 1507 | 1931 | 11   | 1525 | 2539 | 2965 |
| cb5617_c15/f2p0/2303<br>isoform=cb5617_c15;full_length_coverage=2;non_full_length_coverage=0;isoform_length=2303;expected_accuracy=0.995 | gnl BL_ORD_ID 74165 cb5617_c7/f1p0/3437                                                                                                                      | 1092 | 2268 | 1    | 1093 | 2212 | 3388 | 20   | 1110 |
| cb261_c15/f1p0/3068<br>isoform=cb261_c15;full_length_coverage=1;non_full_length_coverage=0;isoform_length=3068;expected_accuracy=0.996   | gnl BL_ORD_ID 69511 cb261_c23/f1p1/3640                                                                                                                      | 1    | 2524 | 2522 | 3068 | 145  | 2677 | 3122 | 3668 |
| cb5815_c16/f2p0/1366<br>isoform=cb5815_c16;full_length_coverage=2;non_full_length_coverage=0;isoform_length=1366;expected_accuracy=0.995 | gnl BL_ORD_ID 73448 cb5815_c7/f1p0/2348                                                                                                                      | 235  | 1340 | 8    | 235  | 1228 | 2333 | 21   | 249  |

---

racy=0.993

|                         |                                                                                                                                                                         |     |      |      |      |      |      |      |      |
|-------------------------|-------------------------------------------------------------------------------------------------------------------------------------------------------------------------|-----|------|------|------|------|------|------|------|
| cb8564_c36731/f1p2/2761 | gnl BL_ORD_ID 13575      cb8564_c20499/f3p0/3328<br>isoform=cb8564_c20499;full_length_coverage=3;non_full_length_coverage=0;isoform_length=3328;expected_accuracy=1.000 | 1   | 1977 | 1972 | 2741 | 1    | 1980 | 2409 | 3179 |
| cb11952_c19/f1p0/1832   | gnl BL_ORD_ID 14854      cb8564_c3814/f1p0/2566<br>isoform=cb8564_c3814;full_length_coverage=1;non_full_length_coverage=0;isoform_length=2566;expected_accuracy=0.993   | 366 | 1804 | 5    | 365  | 1129 | 2563 | 5    | 362  |
| cb8564_c2516/f2p0/2561  | gnl BL_ORD_ID 14698      cb8564_c4069/f2p0/2782<br>isoform=cb8564_c2516;full_length_coverage=2;non_full_length_coverage=0;isoform_length=2561;expected_accuracy=0.994   | 1   | 2112 | 2110 | 2499 | 1    | 2103 | 2393 | 2782 |
| cb7412_c16/f1p0/1476    | gnl BL_ORD_ID 51204      cb7412_c5/f1p2/2647                                                                                                                            | 1   | 1143 | 1142 | 1459 | 1    | 1143 | 2182 | 2500 |
| cb5516_c26/f1p0/3029    | gnl BL_ORD_ID 45350      cb5516_c66/f1p0/3072<br>isoform=cb5516_c26;full_length_coverage=1;non_full_length_coverage=0;isoform_length=3029;expected_accuracy=1.000       | 1   | 2327 | 2322 | 2964 | 1    | 2305 | 2430 | 3072 |
| cb3586_c11/f1p0/2822    | gnl BL_ORD_ID 71356      cb3586_c9/f1p0/3463<br>isoform=cb3586_c11;full_length_coverage=1;non_full_length_coverage=0;isoform_length=2822;expected_accuracy=0.995        | 278 | 2822 | 1    | 278  | 914  | 3471 | 4    | 280  |
| cb8564_c4645/f1p1/2620  | gnl BL_ORD_ID 12605      cb8564_c147470/f1p2/2765<br>isoform=cb8564_c4645;full_length_coverage=1;non_full_length_coverage=1;isoform_length=2620;expected_accuracy=0.993 | 1   | 1828 | 1829 | 2557 | 75   | 1914 | 2038 | 2765 |

---

|                                                                                                                                                            |                                                                                                                                                                                      |     |      |      |      |      |      |      |      |
|------------------------------------------------------------------------------------------------------------------------------------------------------------|--------------------------------------------------------------------------------------------------------------------------------------------------------------------------------------|-----|------|------|------|------|------|------|------|
| curacy=0.994<br>cb8564_c504/f6p2/3836<br>isoform=cb8564_c504;full_length_coverage=6;non_full_length_coverage=2;isoform_length=3836;expected_accuracy=1.000 | ccuracy=0.992<br>gnl BL_ORD_ID 16742      cb8564_c628/f3p1/4943<br>isoform=cb8564_c628;full_length_coverage=3;non_full_length_coverage=1;isoform_length=4943;expected_accuracy=1.000 | 1   | 1915 | 1913 | 3772 | 4    | 1916 | 3085 | 4943 |
| cb8564_c85953/f1p0/2986                                                                                                                                    | gnl BL_ORD_ID 56772      cb8564_c71057/f1p4/4091                                                                                                                                     | 175 | 2717 | 1    | 174  | 1498 | 4044 | 12   | 181  |
| cb8564_c111744/f1p1/2111<br>isoform=cb8564_c111744;full_length_coverage=1;non_full_length_coverage=1;isoform_length=2111;expected_accuracy=0.998           | gnl BL_ORD_ID 11418      cb8564_c146326/f4p0/2491<br>isoform=cb8564_c146326;full_length_coverage=4;non_full_length_coverage=0;isoform_length=2491;expected_accuracy=0.997            | 1   | 1639 | 1635 | 2111 | 83   | 1717 | 1890 | 2366 |
| cb8564_c118662/f1p0/1941                                                                                                                                   | gnl BL_ORD_ID 15094      cb8564_c3728/f3p1/2420<br>isoform=cb8564_c3728;full_length_coverage=3;non_full_length_coverage=1;isoform_length=2420;expected_accuracy=1.000                | 216 | 1847 | 5    | 219  | 785  | 2420 | 14   | 240  |
| cb8564_c3432/f1p0/2118                                                                                                                                     | gnl BL_ORD_ID 13042      cb8564_c161281/f1p7/2816<br>isoform=cb8564_c161281;full_length_coverage=1;non_full_length_coverage=7;isoform_length=2816;expected_accuracy=0.994            | 619 | 2090 | 7    | 623  | 740  | 2210 | 10   | 624  |
| cb5375_c2/f3p0/2503<br>isoform=cb5375_c2;full_length_coverage=3;non_full_length_coverage=0;isoform_length=2503;expected_accuracy=1.000                     | gnl BL_ORD_ID 45225      cb5375_c10/f1p0/2540<br>isoform=cb5375_c10;full_length_coverage=1;non_full_length_coverage=0;isoform_length=2540;expected_accuracy=0.998                    | 1   | 1664 | 1665 | 2405 | 1    | 1665 | 1800 | 2540 |
| cb7336_c3/f1p1/2411<br>isoform=cb7336_c3;full_length_coverage=1;non_full_length_coverage=1;isoform_length=2411;expected_accuracy=1.000                     | gnl BL_ORD_ID 6810      cb7336_c2/f1p1/3070<br>isoform=cb7336_c2;full_length_coverage=1;non_full_length_coverage=1;isoform_length=3070;expected_accuracy=1.000                       | 1   | 1280 | 1277 | 2365 | 56   | 1340 | 1980 | 3070 |

|                          |                                                                                                                                                                                                                      |     |      |      |      |      |      |      |      |  |
|--------------------------|----------------------------------------------------------------------------------------------------------------------------------------------------------------------------------------------------------------------|-----|------|------|------|------|------|------|------|--|
| cy=0.992                 | cy=0.996                                                                                                                                                                                                             |     |      |      |      |      |      |      |      |  |
| cb5608_c33/f1p0/2602     | gnl BL_ORD_ID 46459      cb5608_c24/f1p1/2825<br>isoform=cb5608_c24;full_length_coverage=1;non_full_length_coverage=1;isoform_length=2825;expected_accuracy=0.998                                                    | 763 | 2610 | 9    | 762  | 864  | 2708 | 1    | 755  |  |
| cb18456_c1776/f1p0/1211  | gnl BL_ORD_ID 12597      cb8564_c123090/f1p10/2452<br>isoform=cb8564_c123090;full_length_coverage=1;non_full_length_coverage=10;isoform_length=2452;expected_accuracy=0.993                                          | 280 | 1214 | 9    | 285  | 1513 | 2446 | 1128 | 1401 |  |
| cb8564_c181853/f1p0/2119 | isoform=cb8564_c181853;full_length_coverage=1;non_full_length_coverage=0;isoform_length=2119;expected_accuracy=0.997                                                                                                 |     |      |      |      |      |      |      |      |  |
| cb1524_c18/f1p0/3747     | gnl BL_ORD_ID 54698      cb8564_c155298/f3p9/3822<br>gnl BL_ORD_ID 30626      cb1524_c8/f1p0/3674<br>isoform=cb1524_c8;full_length_coverage=1;non_full_length_coverage=0;isoform_length=3674;expected_accuracy=0.995 | 1   | 1339 | 1334 | 2118 | 1    | 1341 | 2169 | 2953 |  |
| cb8564_c38947/f1p0/2650  | gnl BL_ORD_ID 56727      cb8564_c66920/f3p3/2894<br>isoform=cb8564_c38947;full_length_coverage=1;non_full_length_coverage=0;isoform_length=2650;expected_accuracy=0.996                                              | 1   | 1441 | 1436 | 2643 | 1    | 1439 | 1656 | 2863 |  |
| cb8564_c38947/f1p0/2650  | gnl BL_ORD_ID 55873      cb8564_c47701/f1p0/3144<br>isoform=cb8564_c38947;full_length_coverage=1;non_full_length_coverage=0;isoform_length=2650;expected_accuracy=0.996                                              | 12  | 1441 | 1436 | 2650 | 24   | 1449 | 1666 | 2880 |  |
| cb8564_c40598/f1p4/3119  | gnl BL_ORD_ID 16622      cb8564_c50151/f1p0/3198                                                                                                                                                                     | 1   | 2732 | 2729 | 3051 | 6    | 275  | 2876 | 319  |  |

|                          |                                                                                                                                                                |     |      |      |      |     |     |      |     |
|--------------------------|----------------------------------------------------------------------------------------------------------------------------------------------------------------|-----|------|------|------|-----|-----|------|-----|
|                          | isoform=cb8564_c50151;full_length_coverage=1;non_full_length_coverage=0;isoform_length=3198;expected_accuracy=0.995                                            |     |      |      |      |     |     | 5    | 8   |
| cb307_c3/f1p0/4879       | gnl BL_ORD_ID 68186 cb307_c24/f1p0/6707                                                                                                                        | 1   | 2879 | 2875 | 4446 | 7   | 286 | 4878 | 645 |
|                          |                                                                                                                                                                |     |      |      |      |     | 1   |      | 0   |
| cb2097_c50/f1p0/2824     | gnl BL_ORD_ID 34289 cb2097_c20/f10p3/3179<br>isoform=cb2097_c20;full_length_coverage=10;non_full_length_coverage=3;isoform_length=3179;expected_accuracy=1.000 | 1   | 2323 | 2318 | 2757 | 80  | 240 | 2578 | 301 |
|                          |                                                                                                                                                                |     |      |      |      |     | 3   |      | 6   |
| cb6273_c2/f2p1/2491      | gnl BL_ORD_ID 5821 cb6273_c14/f1p1/5047<br>isoform=cb6273_c14;full_length_coverage=1;non_full_length_coverage=1;isoform_length=5047;expected_accuracy=0.997    | 1   | 1332 | 1330 | 2491 | 58  | 139 | 2963 | 413 |
|                          |                                                                                                                                                                |     |      |      |      |     | 5   |      | 2   |
| cb8564_c36774/f1p0/2756  | gnl BL_ORD_ID 55398 cb8564_c40412/f1p4/3590                                                                                                                    | 145 | 2756 | 1    | 145  | 854 | 347 | 67   | 210 |
|                          |                                                                                                                                                                |     |      |      |      |     | 1   |      |     |
| cb5491_c9/f1p0/3235      | gnl BL_ORD_ID 45975 cb5491_c6/f1p0/3581<br>isoform=cb5491_c6;full_length_coverage=1;non_full_length_coverage=0;isoform_length=3581;expected_accuracy=0.999     | 1   | 2441 | 2438 | 2767 | 114 | 254 | 3205 | 353 |
|                          |                                                                                                                                                                |     |      |      |      |     | 7   |      | 4   |
| cb8564_c36883/f1p0/3072  | gnl BL_ORD_ID 55920 cb8564_c48949/f1p0/4357                                                                                                                    | 1   | 2290 | 2291 | 2957 | 2   | 229 | 2847 | 351 |
|                          |                                                                                                                                                                |     |      |      |      |     | 3   |      | 0   |
| cb8564_c118246/f1p0/2200 | gnl BL_ORD_ID 19172 cb8564_c83528/f4p0/3158                                                                                                                    | 1   | 1819 | 1819 | 2196 | 1   | 182 | 2782 | 315 |

|                                                                                                                      |                                                                                                                     |     |      |      |      |     |     |      |      |   |
|----------------------------------------------------------------------------------------------------------------------|---------------------------------------------------------------------------------------------------------------------|-----|------|------|------|-----|-----|------|------|---|
| isoform=cb8564_c118246;full_length_coverage=1;non_full_length_coverage=0;isoform_length=2200;expected_accuracy=0.997 | isoform=cb8564_c83528;full_length_coverage=4;non_full_length_coverage=0;isoform_length=3158;expected_accuracy=0.996 |     |      |      |      |     |     | 6    |      | 8 |
| cb5867_c4/f1p1/2853                                                                                                  | gnl BL_ORD_ID 74526 cb5867_c7/f1p0/4489                                                                             | 2   | 2012 | 2008 | 2718 | 82  | 209 | 3692 | 440  |   |
| cb6125_c1/f1p0/2190                                                                                                  | gnl BL_ORD_ID 74934 cb6125_c2/f1p0/2571                                                                             | 207 | 2135 | 1    | 207  | 655 | 258 | 20   | 227  |   |
| isoform=cb6125_c1;full_length_coverage=1;non_full_length_coverage=0;isoform_length=2190;expected_accuracy=0.994      |                                                                                                                     |     |      |      |      |     |     |      |      |   |
| cb2471_c1/f7p0/2064                                                                                                  | gnl BL_ORD_ID 37270 cb2471_c8/f3p0/2291                                                                             | 170 | 2064 | 1    | 172  | 382 | 228 | 43   | 224  |   |
| isoform=cb2471_c1;full_length_coverage=7;non_full_length_coverage=0;isoform_length=2064;expected_accuracy=1.000      | isoform=cb2471_c8;full_length_coverage=3;non_full_length_coverage=0;isoform_length=2291;expected_accuracy=0.996     |     |      |      |      |     |     |      |      |   |
| cb8564_c40598/f1p4/3119                                                                                              | gnl BL_ORD_ID 13575 cb8564_c20499/f3p0/3328                                                                         | 1   | 2732 | 2729 | 3071 | 1   | 273 | 2852 | 319  | 5 |
| isoform=cb8564_c20499;full_length_coverage=3;non_full_length_coverage=0;isoform_length=3328;expected_accuracy=1.000  |                                                                                                                     |     |      |      |      |     |     |      |      |   |
| cb4889_c22/f1p0/2625                                                                                                 | gnl BL_ORD_ID 73052 cb4889_c29/f1p0/3264                                                                            | 280 | 2604 | 7    | 285  | 498 | 282 | 52   | 330  |   |
| isoform=cb4889_c22;full_length_coverage=1;non_full_length_coverage=0;isoform_length=2625;expected_accuracy=0.995     |                                                                                                                     |     |      |      |      |     |     |      |      |   |
| cb1770_c3/f3p0/3565                                                                                                  | gnl BL_ORD_ID 33844 cb1770_c9/f1p0/3711                                                                             | 155 | 3565 | 1    | 155  | 267 | 366 | 8    | 162  |   |
| isoform=cb1770_c3;full_length_coverage=3;non_full_length_coverage=0;isoform_length=3565;expected_accuracy=0.999      | isoform=cb1770_c9;full_length_coverage=1;non_full_length_coverage=0;isoform_length=3711;expected_accuracy=0.999     |     |      |      |      |     |     |      |      |   |
| cb8564_c44004/f1p0/2796                                                                                              | gnl BL_ORD_ID 13089 cb8564_c16897/f1p0/3118                                                                         | 1   | 1549 | 1547 | 2795 | 33  | 158 | 1870 | 3118 |   |



|                                                                                                                     |                                                                                                                                                                           |      |      |      |      |      |      |   |      |     |   |  |
|---------------------------------------------------------------------------------------------------------------------|---------------------------------------------------------------------------------------------------------------------------------------------------------------------------|------|------|------|------|------|------|---|------|-----|---|--|
| isoform=cb8564_c44004;full_length_coverage=1;non_full_length_coverage=0;isoform_length=2796;expected_accuracy=1.000 | isoform=cb8564_c16897;full_length_coverage=1;non_full_length_coverage=0;isoform_length=3118;expected_accuracy=0.998                                                       |      |      |      |      |      |      |   |      | 1   |   |  |
| cb8564_c49540/f1p2/2982                                                                                             | gnl BL_ORD_ID 11778      cb8564_c150403/f2p9/3190<br>isoform=cb8564_c150403;full_length_coverage=2;non_full_length_coverage=9;isoform_length=3190;expected_accuracy=0.996 | 750  | 2982 | 77   | 747  | 860  | 309  | 2 | 1    | 677 |   |  |
| cb8564_c77411/f1p0/2169                                                                                             | gnl BL_ORD_ID 10484      cb8564_c107507/f12p0/2558<br>isoform=cb8564_c77411;full_length_coverage=1;non_full_length_coverage=0;isoform_length=2169;expected_accuracy=0.993 | 105  | 2165 | 1    | 106  | 496  | 255  | 8 | 45   | 151 |   |  |
| cb548_c79/f1p2/3153                                                                                                 | gnl BL_ORD_ID 46779      cb548_c109/f1p0/3280<br>isoform=cb548_c109;full_length_coverage=1;non_full_length_coverage=0;isoform_length=3280;expected_accuracy=0.996         | 1292 | 3022 | 1    | 1295 | 1551 | 328  | 0 | 45   | 134 | 0 |  |
| cb14183_c4/f1p0/1000                                                                                                | gnl BL_ORD_ID 63113      cb14183_c3/f1p1/1235<br>isoform=cb14183_c4;full_length_coverage=1;non_full_length_coverage=0;isoform_length=1000;expected_accuracy=0.997         | 118  | 1000 | 3    | 122  | 291  | 1173 | 1 | 120  |     |   |  |
| cb14641_c15/f1p0/1682                                                                                               | gnl BL_ORD_ID 57976      cb8564_c85640/f1p3/2511<br>isoform=cb14641_c15;full_length_coverage=1;non_full_length_coverage=0;isoform_length=1682;expected_accuracy=0.992     | 453  | 1682 | 71   | 452  | 1205 | 243  | 5 | 604  | 987 |   |  |
| cb8564_c186356/f1p0/2744                                                                                            | gnl BL_ORD_ID 56601      cb8564_c48153/f1p0/3083<br>isoform=cb8564_c186356;full_length_coverage=1;non_full_length_coverage=0;isoform_length=2744;expected                 | 1    | 1396 | 1393 | 2744 | 13   | 140  | 5 | 1525 | 287 | 6 |  |

|                                                                                                                                                             |                                                                                                                                                                           |      |      |      |      |      |          |      |          |
|-------------------------------------------------------------------------------------------------------------------------------------------------------------|---------------------------------------------------------------------------------------------------------------------------------------------------------------------------|------|------|------|------|------|----------|------|----------|
| _accuracy=0.998<br>cb3290_c38/f1p0/2345<br>isoform=cb3290_c38;full_length_coverage=1;non_full_length_coverage=0;isoform_length=2345;expected_accuracy=0.996 | gnl BL_ORD_ID 70293 cb3290_c160/f1p0/2670                                                                                                                                 | 1150 | 2333 | 1    | 1151 | 1340 | 252<br>3 | 33   | 1183     |
| cb8564_c13234/f1p0/3522                                                                                                                                     | gnl BL_ORD_ID 54260 cb8564_c21334/f1p0/4233                                                                                                                               | 23   | 2499 | 2497 | 3238 | 26   | 250<br>6 | 2696 | 343<br>7 |
| cb8564_c182028/f1p0/2513<br>isoform=cb8564_c182028;full_length_coverage=1;non_full_length_coverage=0;isoform_length=2513;expected_accuracy=0.996            | gnl BL_ORD_ID 14584      cb8564_c24185/f1p1/2695<br>isoform=cb8564_c24185;full_length_coverage=1;non_full_length_coverage=1;isoform_length=2695;expected_accuracy=0.996   | 1    | 1971 | 1968 | 2513 | 1    | 194<br>2 | 2086 | 263<br>1 |
| cb8564_c46939/f1p1/2926                                                                                                                                     | gnl BL_ORD_ID 12913      cb8564_c182049/f1p0/3195<br>isoform=cb8564_c182049;full_length_coverage=1;non_full_length_coverage=0;isoform_length=3195;expected_accuracy=0.997 | 1    | 2134 | 2130 | 2870 | 1    | 215<br>7 | 2262 | 300<br>9 |
| cb2629_c16/f1p0/2938                                                                                                                                        | gnl BL_ORD_ID 37707      cb2629_c14/f1p0/3350<br>isoform=cb2629_c14;full_length_coverage=1;non_full_length_coverage=0;isoform_length=3350;expected_accuracy=0.996         | 1    | 1728 | 1729 | 2948 | 206  | 193<br>0 | 2133 | 335<br>0 |
| cb8564_c89913/f1p1/3572<br>isoform=cb8564_c89913;full_length_coverage=1;non_full_length_coverage=1;isoform_length=3572;expected_accuracy=0.998              | gnl BL_ORD_ID 57143 cb8564_c84495/f1p0/3631                                                                                                                               | 1    | 2463 | 2463 | 3458 | 67   | 253<br>5 | 2637 | 364<br>6 |
| cb8564_c82539/f7p3/2550                                                                                                                                     | gnl BL_ORD_ID 13518      cb8564_c20989/f1p1/3206<br>isoform=cb8564_c20989;full_length_coverage=1;non_full_length_coverage=1;isoform_length=3206;expected_ac               | 15   | 2040 | 2040 | 2506 | 3    | 202<br>3 | 2740 | 320<br>6 |

|                                                                                                                      |                                                                                                                      |     |      |      |      |      |      |      |      |  |
|----------------------------------------------------------------------------------------------------------------------|----------------------------------------------------------------------------------------------------------------------|-----|------|------|------|------|------|------|------|--|
| cb8564_c185920/f1p0/2777                                                                                             | curacy=0.990<br>gnl BL_ORD_ID 13976      cb8564_c43401/f1p2/3025                                                     |     |      |      |      |      |      |      |      |  |
| isoform=cb8564_c185920;full_length_coverage=1;non_full_length_coverage=0;isoform_length=2777;expected_accuracy=0.996 | isoform=cb8564_c43401;full_length_coverage=1;non_full_length_coverage=2;isoform_length=3025;expected_accuracy=0.995  | 174 | 2776 | 1    | 177  | 373  | 3025 | 18   | 207  |  |
| cb13418_c23/f1p0/1284                                                                                                | gnl BL_ORD_ID 55902      cb8564_c48356/f1p0/3140                                                                     | 528 | 1212 | 7    | 527  | 2272 | 2956 | 1    | 519  |  |
| cb10318_c0/f1p0/1601                                                                                                 | gnl BL_ORD_ID 2074      cb10318_c1/f1p0/2040                                                                         |     |      |      |      |      |      |      |      |  |
| isoform=cb10318_c1;full_length_coverage=1;non_full_length_coverage=0;isoform_length=2040;expected_accuracy=0.997     | isoform=cb10318_c1;full_length_coverage=1;non_full_length_coverage=0;isoform_length=2040;expected_accuracy=0.997     | 694 | 1554 | 9    | 693  | 819  | 1680 | 1    | 688  |  |
| cb489_c1/f1p0/2365                                                                                                   |                                                                                                                      |     |      |      |      |      |      |      |      |  |
| isoform=cb489_c1;full_length_coverage=1;non_full_length_coverage=0;isoform_length=2365;expected_accuracy=0.996       | gnl BL_ORD_ID 70931      cb489_c0/f1p0/4793                                                                          | 1   | 1560 | 1559 | 2365 | 19   | 1578 | 3332 | 4138 |  |
| cb8564_c50697/f1p3/2172                                                                                              |                                                                                                                      |     |      |      |      |      |      |      |      |  |
| isoform=cb8564_c50697;full_length_coverage=1;non_full_length_coverage=3;isoform_length=2172;expected_accuracy=0.993  | gnl BL_ORD_ID 57875      cb8564_c83119/f1p1/3046                                                                     | 106 | 2172 | 1    | 108  | 723  | 2785 | 1    | 106  |  |
| cb8564_c116163/f1p0/1965                                                                                             | gnl BL_ORD_ID 12400      cb8564_c126704/f1p0/2200                                                                    |     |      |      |      |      |      |      |      |  |
| isoform=cb8564_c116163;full_length_coverage=1;non_full_length_coverage=0;isoform_length=1965;expected_accuracy=0.997 | isoform=cb8564_c126704;full_length_coverage=1;non_full_length_coverage=0;isoform_length=2200;expected_accuracy=0.995 | 1   | 1686 | 1685 | 1961 | 1    | 1675 | 1924 | 2200 |  |
| cb446_c16/f1p0/2478                                                                                                  |                                                                                                                      |     |      |      |      |      |      |      |      |  |
| isoform=cb446_c16;full_length_coverage=1;non_full_length_coverage=0;isoform_length=2478;expected_accuracy=0.997      | gnl BL_ORD_ID 72186      cb446_c49/f1p0/2765                                                                         | 758 | 2478 | 95   | 762  | 823  | 2543 | 5    | 672  |  |

|                                                                                                                     |                                                                                                                     |                         |      |      |      |      |      |      |      |      |
|---------------------------------------------------------------------------------------------------------------------|---------------------------------------------------------------------------------------------------------------------|-------------------------|------|------|------|------|------|------|------|------|
| acy=1.000                                                                                                           |                                                                                                                     |                         |      |      |      |      |      |      |      |      |
| cb3554_c10/f1p0/3346                                                                                                | gnl BL_ORD_ID 41040                                                                                                 | cb3554_c8/f1p0/3574     |      |      |      |      |      |      |      |      |
| isoform=cb3554_c10;full_length_coverage=1;non_full_length_coverage=0;isoform_length=3346;expected_accuracy=0.994    | isoform=cb3554_c8;full_length_coverage=1;non_full_length_coverage=0;isoform_length=3574;expected_accuracy=0.996     |                         | 1    | 2402 | 2401 | 3298 | 1    | 2428 | 2671 | 3574 |
| cb3011_c11/f1p0/3340                                                                                                | gnl BL_ORD_ID 38768                                                                                                 | cb3011_c16/f1p0/3695    |      |      |      |      |      |      |      |      |
| isoform=cb3011_c11;full_length_coverage=1;non_full_length_coverage=0;isoform_length=3340;expected_accuracy=0.999    | isoform=cb3011_c16;full_length_coverage=1;non_full_length_coverage=0;isoform_length=3695;expected_accuracy=0.998    |                         | 1053 | 3340 | 1    | 1053 | 1329 | 3614 | 1    | 1048 |
| cb1307_c23/f1p0/2549                                                                                                | gnl BL_ORD_ID 61219                                                                                                 | cb1307_c4/f1p0/4042     |      |      |      |      |      |      |      |      |
| isoform=cb1307_c23;full_length_coverage=1;non_full_length_coverage=0;isoform_length=2549;expected_accuracy=0.999    | isoform=cb1307_c4;full_length_coverage=1;non_full_length_coverage=0;isoform_length=4042;expected_accuracy=0.999     |                         | 1    | 1534 | 1532 | 2466 | 1029 | 2563 | 2705 | 3634 |
| cb4233_c77/f1p1/2209                                                                                                | gnl BL_ORD_ID 43581                                                                                                 | cb4233_c85/f1p0/2730    |      |      |      |      |      |      |      |      |
| isoform=cb4233_c77;full_length_coverage=1;non_full_length_coverage=1;isoform_length=2209;expected_accuracy=0.995    | isoform=cb4233_c85;full_length_coverage=1;non_full_length_coverage=0;isoform_length=2730;expected_accuracy=0.995    |                         | 14   | 1710 | 1710 | 2120 | 454  | 2147 | 2318 | 2730 |
| cb2229_c66/f60p1/2354                                                                                               | gnl BL_ORD_ID 38403                                                                                                 | cb2229_c71/f3p0/3903    |      |      |      |      |      |      |      |      |
| isoform=cb2229_c66;full_length_coverage=60;non_full_length_coverage=1;isoform_length=2354;expected_accuracy=0.999   | isoform=cb2229_c71;full_length_coverage=3;non_full_length_coverage=0;isoform_length=3903;expected_accuracy=1.000    |                         | 1    | 1690 | 1687 | 2286 | 83   | 1774 | 3303 | 3903 |
| cb2882_c2/f1p0/2136                                                                                                 | gnl BL_ORD_ID 68972                                                                                                 | cb2882_c4/f1p0/2356     |      |      |      |      |      |      |      |      |
| isoform=cb2882_c2;full_length_coverage=1;non_full_length_coverage=0;isoform_length=2136;expected_accuracy=0.994     | isoform=cb2882_c4;full_length_coverage=1;non_full_length_coverage=0;isoform_length=2356;expected_accuracy=0.994     |                         | 178  | 2136 | 1    | 177  | 373  | 2331 | 79   | 255  |
| cb8564_c36689/f1p1/2368                                                                                             | gnl BL_ORD_ID 14410                                                                                                 | cb8564_c44256/f1p1/3267 |      |      |      |      |      |      |      |      |
| isoform=cb8564_c36689;full_length_coverage=1;non_full_length_coverage=1;isoform_length=2368;expected_accuracy=0.999 | isoform=cb8564_c44256;full_length_coverage=1;non_full_length_coverage=1;isoform_length=3267;expected_accuracy=0.999 |                         | 1    | 1709 | 1706 | 2368 | 1    | 1669 | 2605 | 3267 |

|                          |                                                                                                                                                                          |     |      |      |      |      |      |      |      |  |
|--------------------------|--------------------------------------------------------------------------------------------------------------------------------------------------------------------------|-----|------|------|------|------|------|------|------|--|
| accuracy=0.991           | curacy=0.995                                                                                                                                                             |     |      |      |      |      |      |      |      |  |
| cb8564_c17422/f1p1/4151  | gnl BL_ORD_ID 13288      cb8564_c20074/f1p2/3928<br>isoform=cb8564_c20074;full_length_coverage=1;non_full_length_coverage=2;isoform_length=3928;expected_accuracy=0.995  | 24  | 3391 | 3389 | 3827 | 1    | 3368 | 3481 | 3919 |  |
| cb8564_c13505/f1p0/3470  | gnl BL_ORD_ID 18192      cb8564_c9970/f2p1/3736<br>isoform=cb8564_c9970;full_length_coverage=2;non_full_length_coverage=1;isoform_length=3736;expected_accuracy=0.998    | 148 | 3445 | 1    | 148  | 440  | 3736 | 3    | 150  |  |
| cb8526_c8/f1p0/1787      | gnl BL_ORD_ID 9319      cb8526_c1/f2p0/2143<br>isoform=cb8526_c1;full_length_coverage=2;non_full_length_coverage=0;isoform_length=2143;expected_accuracy=0.997           | 252 | 1782 | 37   | 254  | 610  | 2141 | 20   | 238  |  |
| cb8564_c16914/f2p0/3868  | gnl BL_ORD_ID 34463      cb18696_c0/f1p1/5162<br>isoform=cb8564_c16914;full_length_coverage=2;non_full_length_coverage=0;isoform_length=3868;expected_accuracy=1.000     | 1   | 3274 | 3274 | 3868 | 1    | 3272 | 3690 | 4283 |  |
| cb8564_c111632/f1p0/2604 | gnl BL_ORD_ID 16522      cb8564_c74617/f7p2/3311<br>isoform=cb8564_c111632;full_length_coverage=1;non_full_length_coverage=0;isoform_length=2604;expected_accuracy=0.991 | 1   | 1688 | 1688 | 2604 | 188  | 1866 | 2403 | 3311 |  |
| cb8564_c43546/f1p1/3276  | gnl BL_ORD_ID 16172      cb8564_c53024/f1p0/3159<br>isoform=cb8564_c53024;full_length_coverage=1;non_full_length_coverage=0;isoform_length=3159;expected_accuracy=0.996  | 10  | 1731 | 1728 | 2854 | 1    | 1699 | 2017 | 3142 |  |
| cb8564_c15230/f1p0/1944  | gnl BL_ORD_ID 55239      cb8564_c36145/f1p0/2868                                                                                                                         | 352 | 1944 | 5    | 357  | 1063 | 265  | 1    | 353  |  |

|                                                                                                                                                  |                                                                                                                                                                    |     |      |      |      |      |          |      |          |
|--------------------------------------------------------------------------------------------------------------------------------------------------|--------------------------------------------------------------------------------------------------------------------------------------------------------------------|-----|------|------|------|------|----------|------|----------|
| cb8564_c87624/f1p0/2450                                                                                                                          | gnl BL_ORD_ID 58108 cb8564_c89073/f1p0/3953                                                                                                                        | 1   | 1650 | 1649 | 2405 | 57   | 170<br>6 | 3206 | 396<br>2 |
| cb8564_c3087/f1p0/2090<br>isoform=cb8564_c3087;full_length_coverage=1;non_full_length_coverage=0;isoform_length=2090;expected_accuracy=1.000     | gnl BL_ORD_ID 53663 cb8564_c151176/f1p0/2365                                                                                                                       | 13  | 1914 | 1909 | 2090 | 1    | 190<br>6 | 2012 | 218<br>7 |
| cb8564_c69975/f1p0/2818<br>isoform=cb8564_c69975;full_length_coverage=1;non_full_length_coverage=0;isoform_length=2818;expected_accuracy=0.999   | gnl BL_ORD_ID 16997 cb8564_c75534/f1p0/3028<br>isoform=cb8564_c75534;full_length_coverage=1;non_full_length_coverage=0;isoform_length=3028;expected_accuracy=0.994 | 260 | 2818 | 2    | 258  | 429  | 301<br>2 | 1    | 267      |
| cb2263_c4/f2p0/2476<br>isoform=cb2263_c4;full_length_coverage=2;non_full_length_coverage=0;isoform_length=2476;expected_accuracy=0.994           | gnl BL_ORD_ID 36791 cb2263_c5/f1p0/3994<br>isoform=cb2263_c5;full_length_coverage=1;non_full_length_coverage=0;isoform_length=3994;expected_accuracy=0.998         | 1   | 1406 | 1407 | 2476 | 25   | 143<br>6 | 2457 | 352<br>6 |
| cb8564_c148768/f2p6/2332<br>isoform=cb8564_c148768;full_length_coverage=2;non_full_length_coverage=6;isoform_length=2332;expected_accuracy=0.996 | gnl BL_ORD_ID 56180 cb8564_c71615/f1p1/4167                                                                                                                        | 1   | 1874 | 1874 | 2243 | 2    | 187<br>8 | 3590 | 395<br>9 |
| cb8564_c42814/f1p0/2151<br>isoform=cb8564_c42814;full_length_coverage=1;non_full_length_coverage=0;isoform_length=2151;expected_accuracy=0.993   | gnl BL_ORD_ID 56624 cb8564_c49356/f1p0/3133                                                                                                                        | 650 | 2151 | 7    | 652  | 1329 | 285<br>0 | 1    | 641      |
| cb4758_c4/f1p0/2881<br>isoform=cb4758_c4;full_length_coverage=1;non_full_length_coverage=0;isoform_length=2881;expected_accuracy=0.993           | gnl BL_ORD_ID 71991 cb4758_c5/f1p0/3624                                                                                                                            | 1   | 2263 | 2264 | 2881 | 368  | 263<br>5 | 2748 | 336<br>6 |

|                                                                                                                                                     |                                             |     |      |      |      |      |      |      |      |
|-----------------------------------------------------------------------------------------------------------------------------------------------------|---------------------------------------------|-----|------|------|------|------|------|------|------|
| acy=0.995<br>cb1468_c1/f4p2/2905<br>isoform=cb1468_c1;full_length_coverage=4;non_full_length_coverage=2;isoform_length=2905;expected_accuracy=1.000 | gnl BL_ORD_ID 63645 cb1468_c3/f1p0/4312     | 1   | 2049 | 2048 | 2860 | 94   | 2140 | 3043 | 3855 |
| cb8564_c37147/f1p0/2262<br>isoform=cb8564_c37147;full_length_coverage=1;non_full_length_coverage=0;isoform_length=2262;expected_accuracy=0.998      | gnl BL_ORD_ID 56693 cb8564_c52693/f2p0/3348 | 294 | 2262 | 5    | 296  | 1069 | 3030 | 5    | 294  |
| cb8564_c15653/f1p4/2475<br>isoform=cb8564_c12355;full_length_coverage=1;non_full_length_coverage=9;isoform_length=2685;expected_accuracy=0.999      | gnl BL_ORD_ID 11316 cb8564_c12355/f1p9/2685 | 1   | 2293 | 2289 | 2434 | 1    | 2321 | 2540 | 2685 |
| cb1767_c17/f1p1/2756<br>isoform=cb1767_c17;full_length_coverage=1;non_full_length_coverage=1;isoform_length=2756;expected_accuracy=0.995            | gnl BL_ORD_ID 32461 cb1767_c16/f1p0/2784    | 1   | 1825 | 1823 | 2645 | 20   | 1846 | 1961 | 2784 |
| cb1545_c26/f1p0/3338<br>isoform=cb295_c53;full_length_coverage=1;non_full_length_coverage=0;isoform_length=1719;expected_accuracy=0.994             | gnl BL_ORD_ID 63731 cb1545_c18/f1p0/3314    | 1   | 2013 | 2014 | 3212 | 115  | 2127 | 2011 | 3210 |
| cb295_c53/f1p0/1719<br>isoform=cb295_c53;full_length_coverage=1;non_full_length_coverage=0;isoform_length=1719;expected_accuracy=0.994              | gnl BL_ORD_ID 69540 cb295_c48/f1p1/2137     | 1   | 1347 | 1345 | 1699 | 249  | 1598 | 1722 | 2075 |
| cb14697_c4/f2p1/1690<br>isoform=cb14697_c4;full_length_coverage=2;non_full_length_coverage=1;isoform_length=1690;expected_accuracy=0.995            | gnl BL_ORD_ID 9229 cb8564_c120266/f1p0/2493 | 641 | 1687 | 9    | 645  | 1447 | 2493 | 46   | 682  |

|                                                                                                                     |                                                                                                                                                            |      |      |      |      |      |          |      |          |  |
|---------------------------------------------------------------------------------------------------------------------|------------------------------------------------------------------------------------------------------------------------------------------------------------|------|------|------|------|------|----------|------|----------|--|
| racy=0.995                                                                                                          | ccuracy=0.997                                                                                                                                              |      |      |      |      |      |          |      |          |  |
| cb5359_c41/f1p0/1175                                                                                                | gnl BL_ORD_ID 73821 cb5359_c20/f1p0/2586                                                                                                                   | 125  | 1164 | 3    | 126  | 1432 | 247<br>1 | 67   | 190      |  |
| cb4493_c8/f1p0/2014                                                                                                 |                                                                                                                                                            |      |      |      |      |      |          |      |          |  |
| isoform=cb4493_c8;full_length_coverage=1;non_full_length_coverage=0;isoform_length=2014;expected_accuracy=0.991     | gnl BL_ORD_ID 72610 cb4493_c6/f1p0/3333                                                                                                                    | 1    | 1023 | 1024 | 2010 | 239  | 126<br>5 | 2103 | 309<br>5 |  |
| cb2818_c54/f1p1/2570                                                                                                | gnl BL_ORD_ID 38592 cb2818_c9/f2p2/3193<br>isoform=cb2818_c9;full_length_coverage=2;non_full_length_coverage=2;isoform_length=3193;expected_accuracy=0.997 | 1    | 2142 | 2141 | 2547 | 1    | 214<br>0 | 2607 | 301<br>0 |  |
| cb188_c3/f1p1/3195                                                                                                  |                                                                                                                                                            |      |      |      |      |      |          |      |          |  |
| isoform=cb188_c3;full_length_coverage=1;non_full_length_coverage=1;isoform_length=3195;expected_accuracy=0.997      | gnl BL_ORD_ID 68083 cb188_c1/f1p1/4971                                                                                                                     | 1369 | 3161 | 1    | 1370 | 3054 | 484<br>6 | 874  | 224<br>3 |  |
| cb8564_c20234/f1p0/3982                                                                                             |                                                                                                                                                            |      |      |      |      |      |          |      |          |  |
| isoform=cb8564_c20234;full_length_coverage=1;non_full_length_coverage=0;isoform_length=3982;expected_accuracy=0.995 | gnl BL_ORD_ID 54245 cb8564_c21117/f1p0/4721                                                                                                                | 1215 | 3982 | 109  | 1220 | 1913 | 468<br>3 | 1    | 1111     |  |
| cb5643_c66/f1p0/2234                                                                                                | gnl BL_ORD_ID 46677 cb5643_c120/f3p1/2448                                                                                                                  |      |      |      |      |      |          |      |          |  |
| isoform=cb5643_c66;full_length_coverage=1;non_full_length_coverage=0;isoform_length=2234;expected_accuracy=0.996    | isoform=cb5643_c120;full_length_coverage=3;non_full_length_coverage=1;isoform_length=2448;expected_accuracy=1.000                                          | 201  | 2234 | 1    | 202  | 392  | 242<br>5 | 26   | 226      |  |
| cb8564_c54233/f1p1/3194                                                                                             | gnl BL_ORD_ID 16149 cb8564_c47162/f1p0/3361                                                                                                                |      |      |      |      |      |          |      |          |  |
| isoform=cb8564_c54233;full_length_coverage=1;non_full_length_coverage=1;isoform_length=3194;expected_               | isoform=cb8564_c47162;full_length_coverage=1;non_full_length_coverage=0;isoform_length=3361;expected_ac                                                    | 429  | 3194 | 8    | 430  | 592  | 335<br>9 | 2    | 402      |  |



|                                                                                                                      |                                                                                                                      |      |      |      |      |      |      |      |      |  |
|----------------------------------------------------------------------------------------------------------------------|----------------------------------------------------------------------------------------------------------------------|------|------|------|------|------|------|------|------|--|
| accuracy=0.995                                                                                                       | curacy=0.996                                                                                                         |      |      |      |      |      |      |      |      |  |
| cb12805_c0/f2p0/1819                                                                                                 |                                                                                                                      |      |      |      |      |      |      |      |      |  |
| isoform=cb12805_c0;full_length_coverage=2;non_full_length_coverage=0;isoform_length=1819;expected_accuracy=0.993     | gnl BL_ORD_ID 54512 cb8564_c124861/f1p0/2013                                                                         | 1    | 1035 | 1034 | 1810 | 52   | 1086 | 1256 | 2032 |  |
| cb18649_c3/f1p0/5011                                                                                                 | gnl BL_ORD_ID 69440 cb18649_c7/f1p0/5612                                                                             | 260  | 4791 | 1    | 260  | 751  | 5282 | 9    | 278  |  |
| cb3978_c5/f1p0/3304                                                                                                  | gnl BL_ORD_ID 39556 cb3978_c3/f2p0/5092                                                                              |      |      |      |      |      |      |      |      |  |
| isoform=cb3978_c5;full_length_coverage=1;non_full_length_coverage=0;isoform_length=3304;expected_accuracy=0.998      | isoform=cb3978_c3;full_length_coverage=2;non_full_length_coverage=0;isoform_length=5092;expected_accuracy=1.000      | 1087 | 3193 | 1    | 1090 | 2987 | 5092 | 31   | 1128 |  |
| cb8564_c14344/f1p0/2533                                                                                              | gnl BL_ORD_ID 16004 cb8564_c48473/f1p2/2701                                                                          |      |      |      |      |      |      |      |      |  |
| isoform=cb8564_c14344;full_length_coverage=1;non_full_length_coverage=0;isoform_length=2533;expected_accuracy=0.993  | isoform=cb8564_c48473;full_length_coverage=1;non_full_length_coverage=2;isoform_length=2701;expected_accuracy=0.999  | 148  | 2525 | 1    | 151  | 322  | 2701 | 3    | 152  |  |
| cb3733_c6/f1p1/1240                                                                                                  | gnl BL_ORD_ID 70573 cb3733_c4/f1p0/3433                                                                              | 419  | 1239 | 56   | 421  | 2574 | 3394 | 1    | 366  |  |
| cb295_c13/f1p1/3878                                                                                                  | gnl BL_ORD_ID 34398 cb18646_c0/f2p2/6586                                                                             |      |      |      |      |      |      |      |      |  |
| isoform=cb295_c13;full_length_coverage=1;non_full_length_coverage=1;isoform_length=3878;expected_accuracy=0.994      | isoform=cb18646_c0;full_length_coverage=2;non_full_length_coverage=2;isoform_length=6586;expected_accuracy=0.999     | 1    | 3634 | 3633 | 3827 | 2503 | 6158 | 6391 | 6586 |  |
| cb8564_c122994/f1p1/1940                                                                                             | gnl BL_ORD_ID 11859 cb8564_c126680/f3p4/2272                                                                         |      |      |      |      |      |      |      |      |  |
| isoform=cb8564_c122994;full_length_coverage=1;non_full_length_coverage=1;isoform_length=1940;expected_accuracy=1.000 | isoform=cb8564_c126680;full_length_coverage=3;non_full_length_coverage=4;isoform_length=2272;expected_accuracy=0.996 | 1    | 1748 | 1748 | 1940 | 104  | 1849 | 1991 | 2184 |  |
| cb6256_c6/f1p1/2316                                                                                                  | gnl BL_ORD_ID 5661 cb6256_c4/f2p2/2901                                                                               | 1137 | 2284 | 1    | 1137 | 1739 | 288  | 1    | 1140 |  |

|                                                                                                                                            |                                                                                                                                                                    |      |      |      |      |      |     |      |      |     |
|--------------------------------------------------------------------------------------------------------------------------------------------|--------------------------------------------------------------------------------------------------------------------------------------------------------------------|------|------|------|------|------|-----|------|------|-----|
| isoform=cb6256_c6;full_length_coverage=1;non_full_length_coverage=1;isoform_length=2316;expected_accuracy=1.000<br>cb4768_c85/f1p0/1983    | isoform=cb6256_c4;full_length_coverage=2;non_full_length_coverage=2;isoform_length=2901;expected_accuracy=0.997                                                    |      |      |      |      |      |     |      |      | 7   |
| isoform=cb4768_c85;full_length_coverage=1;non_full_length_coverage=0;isoform_length=1983;expected_accuracy=1.000<br>cb16569_c42/f1p1/1715  | gnl BL_ORD_ID 63765 cb1590_c41/f1p0/3526                                                                                                                           | 103  | 1966 | 1    | 106  | 1892 | 29  | 2312 | 220  | 6   |
| isoform=cb16569_c42;full_length_coverage=1;non_full_length_coverage=1;isoform_length=1715;expected_accuracy=1.000<br>cb7851_c2/f1p0/2210   | gnl BL_ORD_ID 19815 cb8916_c26/f1p0/1759<br>isoform=cb8916_c26;full_length_coverage=1;non_full_length_coverage=0;isoform_length=1759;expected_accuracy=0.999       | 202  | 1673 | 6    | 204  | 289  | 175 | 9    | 3    | 187 |
| isoform=cb7851_c2;full_length_coverage=1;non_full_length_coverage=0;isoform_length=2210;expected_accuracy=0.994<br>cb8564_c14344/f1p0/2533 | gnl BL_ORD_ID 8230 cb7851_c3/f1p0/2493<br>isoform=cb7851_c3;full_length_coverage=1;non_full_length_coverage=0;isoform_length=2493;expected_accuracy=0.991          | 1    | 1304 | 1304 | 2201 | 1    | 128 | 4    | 1598 | 249 |
| isoform=cb8564_c14344;full_length_coverage=1;non_full_length_coverage=0;isoform_length=2533;expected_accuracy=0.993<br>cb1096_c4/f2p1/2193 | gnl BL_ORD_ID 55220 cb8564_c35645/f1p0/2804                                                                                                                        | 148  | 2517 | 1    | 151  | 356  | 272 | 6    | 1    | 151 |
| isoform=cb1096_c4;full_length_coverage=2;non_full_length_coverage=1;isoform_length=2193;expected_accuracy=0.992<br>cb8564_c37748/f1p0/3835 | gnl BL_ORD_ID 47346 cb1096_c13/f1p0/3282                                                                                                                           | 1048 | 2118 | 1    | 1049 | 2230 | 329 | 9    | 13   | 106 |
| isoform=cb8564_c37748;full_length_coverage=1;non_full_length_coverage=0;isoform_length=3835;expected_accuracy=1.000                        | gnl BL_ORD_ID 15378 cb8564_c37602/f2p1/3926<br>isoform=cb8564_c37602;full_length_coverage=2;non_full_length_coverage=1;isoform_length=3926;expected_accuracy=0.999 | 287  | 3732 | 1    | 286  | 396  | 384 | 6    | 6    | 272 |

|                                                                                                                     |                                                                                                                 |      |      |      |      |      |      |      |      |  |
|---------------------------------------------------------------------------------------------------------------------|-----------------------------------------------------------------------------------------------------------------|------|------|------|------|------|------|------|------|--|
| accuracy=0.995                                                                                                      | accuracy=0.999                                                                                                  |      |      |      |      |      |      |      |      |  |
| cb606_c5/flp1/3393                                                                                                  |                                                                                                                 |      |      |      |      |      |      |      |      |  |
| isoform=cb606_c5;full_length_coverage=1;non_full_length_coverage=1;isoform_length=3393;expected_accuracy=0.998      | gnl BL_ORD_ID 73588 cb606_c11/flp0/4621                                                                         | 1    | 3229 | 3228 | 3393 | 6    | 3238 | 3985 | 4150 |  |
| cb5921_c65/f77p8/2262                                                                                               |                                                                                                                 |      |      |      |      |      |      |      |      |  |
| isoform=cb5921_c65;full_length_coverage=77;non_full_length_coverage=8;isoform_length=2262;expected_accuracy=1.000   | gnl BL_ORD_ID 74654 cb5921_c44/flp1/2444                                                                        | 1    | 2068 | 2069 | 2220 | 1    | 2070 | 2184 | 2336 |  |
| cb8564_c24867/flp3/2846                                                                                             | gnl BL_ORD_ID 9350 cb8564_c11826/flp0/2916                                                                      |      |      |      |      |      |      |      |      |  |
| isoform=cb8564_c11826;full_length_coverage=1;non_full_length_coverage=0;isoform_length=2916;expected_accuracy=0.997 |                                                                                                                 | 1288 | 2661 | 12   | 1289 | 1543 | 2916 | 23   | 1296 |  |
| cb8564_c43399/flp0/2654                                                                                             |                                                                                                                 |      |      |      |      |      |      |      |      |  |
| isoform=cb8564_c43399;full_length_coverage=1;non_full_length_coverage=0;isoform_length=2654;expected_accuracy=0.999 | gnl BL_ORD_ID 55213 cb8564_c35568/flp0/2997                                                                     | 1    | 2367 | 2363 | 2654 | 13   | 2385 | 2600 | 2890 |  |
| cb6442_c10/flp1/2623                                                                                                |                                                                                                                 |      |      |      |      |      |      |      |      |  |
| isoform=cb6442_c10;full_length_coverage=1;non_full_length_coverage=1;isoform_length=2623;expected_accuracy=0.996    | gnl BL_ORD_ID 49727 cb6442_c3/flp1/2761                                                                         | 1111 | 2578 | 1    | 1112 | 1235 | 2704 | 1    | 1117 |  |
| cb2448_c3/flp0/3231                                                                                                 | gnl BL_ORD_ID 36831 cb2448_c2/flp0/3926                                                                         |      |      |      |      |      |      |      |      |  |
| isoform=cb2448_c3;full_length_coverage=1;non_full_length_coverage=0;isoform_length=3231;expected_accuracy=0.994     | isoform=cb2448_c2;full_length_coverage=1;non_full_length_coverage=0;isoform_length=3926;expected_accuracy=0.999 | 1    | 2664 | 2664 | 3194 | 17   | 2684 | 3397 | 3926 |  |
| cb8564_c123093/flp0/2918                                                                                            | gnl BL_ORD_ID 10605 cb8564_c114675/flp2/2937                                                                    | 1214 | 2924 | 1    | 1213 | 1109 | 281  | 5    | 122  |  |

|                                                                                                                      |                                                                                                                      |     |      |      |      |      |     |      |     |
|----------------------------------------------------------------------------------------------------------------------|----------------------------------------------------------------------------------------------------------------------|-----|------|------|------|------|-----|------|-----|
|                                                                                                                      | isoform=cb8564_c114675;full_length_coverage=1;non_full_length_coverage=2;isoform_length=2937;expected_accuracy=0.998 |     |      |      |      |      |     | 9    | 5   |
| cb4997_c18/f1p0/2327                                                                                                 | gnl BL_ORD_ID 73169 cb4997_c12/f1p1/2947                                                                             | 1   | 1547 | 1543 | 2091 | 16   | 156 | 2383 | 293 |
|                                                                                                                      |                                                                                                                      |     |      |      |      |      | 1   |      | 4   |
| cb8564_c180116/f1p0/2944                                                                                             | gnl BL_ORD_ID 55182 cb8564_c34825/f1p2/3200                                                                          | 14  | 2522 | 2520 | 2944 | 6    | 254 | 2771 | 319 |
| isoform=cb8564_c180116;full_length_coverage=1;non_full_length_coverage=0;isoform_length=2944;expected_accuracy=0.996 |                                                                                                                      |     |      |      |      |      | 2   |      | 2   |
| cb8564_c38947/f1p0/2650                                                                                              | gnl BL_ORD_ID 55213 cb8564_c35568/f1p0/2997                                                                          | 1   | 1441 | 1436 | 2650 | 13   | 146 | 1677 | 288 |
| isoform=cb8564_c38947;full_length_coverage=1;non_full_length_coverage=0;isoform_length=2650;expected_accuracy=0.996  |                                                                                                                      |     |      |      |      |      | 0   |      | 9   |
| cb868_c17/f1p0/3361                                                                                                  | gnl BL_ORD_ID 57582 cb868_c5/f1p0/3523                                                                               | 1   | 1833 | 1833 | 3334 | 43   | 187 | 1985 | 348 |
|                                                                                                                      |                                                                                                                      |     |      |      |      |      | 5   |      | 6   |
| cb5022_c10/f1p0/3124                                                                                                 | gnl BL_ORD_ID 73204 cb5022_c7/f1p0/3286                                                                              | 152 | 3028 | 11   | 153  | 275  | 315 | 3    | 144 |
|                                                                                                                      |                                                                                                                      |     |      |      |      |      | 2   |      |     |
| cb12972_c13/f1p0/1732                                                                                                | gnl BL_ORD_ID 14141 cb8564_c2622/f1p1/2613                                                                           | 165 | 1725 | 1    | 166  | 1054 | 261 | 39   | 204 |
| isoform=cb8564_c2622;full_length_coverage=1;non_full_length_coverage=1;isoform_length=2613;expected_accuracy=0.996   |                                                                                                                      |     |      |      |      |      | 2   |      |     |
| cb13565_c65/f1p4/1614                                                                                                | gnl BL_ORD_ID 4515 cb6452_c4/f1p3/2166                                                                               | 435 | 1614 | 61   | 434  | 948  | 212 | 40   | 414 |
| isoform=cb13565_c65;full_length_coverage=1;non_full_length_coverage=4;isoform_length=1614;expected_accuracy=1.000    | isoform=cb6452_c4;full_length_coverage=1;non_full_length_coverage=3;isoform_length=2166;expected_accuracy=1.000      |     |      |      |      |      | 9   |      |     |
| cb9448_c0/f7p1/1767                                                                                                  | gnl BL_ORD_ID 58727 cb9448_c9/f1p1/1806                                                                              | 547 | 1767 | 85   | 546  | 582  | 180 | 1    | 460 |

|                                                                                                                                              |                     |                         |     |      |      |      |     |      |      |      |
|----------------------------------------------------------------------------------------------------------------------------------------------|---------------------|-------------------------|-----|------|------|------|-----|------|------|------|
| isoform=cb9448_c0;full_length_coverage=7;non_full_length_coverage=1;isoform_length=1767;expected_accuracy=1.000                              |                     |                         |     |      |      |      |     |      |      | 2    |
| cb10045_c38/f10p4/1463<br>isoform=cb10045_c38;full_length_coverage=10;non_full_length_coverage=4;isoform_length=1463;expected_accuracy=1.000 | gnl BL_ORD_ID 1795  | cb10045_c18/f1p2/1574   | 141 | 1463 | 13   | 141  | 251 | 1573 | 1    | 129  |
| cb288_c0/f4p0/4339<br>isoform=cb288_c0;full_length_coverage=4;non_full_length_coverage=0;isoform_length=4339;expected_accuracy=1.000         | gnl BL_ORD_ID 68165 | cb288_c3/f1p0/4898      | 176 | 4339 | 13   | 175  | 637 | 4800 | 1    | 162  |
| cb9788_c36/f1p0/1958                                                                                                                         | gnl BL_ORD_ID 58889 | cb9788_c16/f1p0/3980    | 13  | 1340 | 1339 | 1901 | 1   | 1322 | 3000 | 3556 |
| cb7935_c3/f1p0/2325                                                                                                                          | gnl BL_ORD_ID 51636 | cb7935_c1/f1p0/2562     | 1   | 1764 | 1762 | 2335 | 4   | 1769 | 1933 | 2506 |
| cb8564_c15654/f1p1/3152                                                                                                                      | gnl BL_ORD_ID 11704 | cb8564_c15268/f1p0/3312 | 118 | 2774 | 2773 | 3167 | 1   | 2656 | 2900 | 3294 |
| cb7209_c6/f1p0/2322<br>isoform=cb7209_c6;full_length_coverage=1;non_full_length_coverage=0;isoform_length=2322;expected_accuracy=0.999       | gnl BL_ORD_ID 8776  | cb7209_c18/f1p1/2480    | 1   | 1583 | 1580 | 2322 | 25  | 1600 | 1729 | 2471 |
| cb8564_c116193/f1p0/2609                                                                                                                     | gnl BL_ORD_ID 15835 | cb8564_c73664/f5p3/2665 | 2   | 2262 | 2258 | 2658 | 1   | 2276 | 2141 | 2542 |

|                         |                                                                                                                                                                                         |      |      |      |      |      |      |      |      |
|-------------------------|-----------------------------------------------------------------------------------------------------------------------------------------------------------------------------------------|------|------|------|------|------|------|------|------|
| cb8564_c36134/f1p0/3837 | curacy=0.994<br>gnl BL_ORD_ID 14498      cb8564_c35468/f1p0/4536<br>isoform=cb8564_c35468;full_length_coverage=1;non_full_length_coverage=0;isoform_length=4536;expected_accuracy=0.995 | 1416 | 3840 | 1    | 1415 | 1929 | 4350 | 10   | 1424 |
| cb8564_c46939/f1p1/2926 | gnl BL_ORD_ID 16886      cb8564_c50727/f1p0/3201<br>isoform=cb8564_c50727;full_length_coverage=1;non_full_length_coverage=0;isoform_length=3201;expected_accuracy=0.999                 | 1    | 2134 | 2130 | 2870 | 3    | 2169 | 2274 | 3015 |
| cb1088_c12/f1p0/2593    | gnl BL_ORD_ID 1950      cb1088_c5/f1p0/3109<br>isoform=cb1088_c5;full_length_coverage=1;non_full_length_coverage=0;isoform_length=3109;expected_accuracy=0.995                          | 1    | 1648 | 1650 | 2426 | 175  | 1820 | 2334 | 3109 |
| cb1438_c12/f1p0/3268    | gnl BL_ORD_ID 30573      cb1438_c3/f3p3/4154<br>isoform=cb1438_c3;full_length_coverage=3;non_full_length_coverage=3;isoform_length=4154;expected_accuracy=1.000                         | 1435 | 3296 | 1    | 1439 | 2221 | 4082 | 540  | 1980 |
| cb965_c9/f2p4/4285      | gnl BL_ORD_ID 19288      cb965_c14/f1p0/4481<br>isoform=cb965_c9;full_length_coverage=2;non_full_length_coverage=4;isoform_length=4285;expected_accuracy=0.999                          | 2086 | 4285 | 2    | 2090 | 2225 | 4426 | 1    | 2083 |
| cb8895_c5/f1p0/1953     | gnl BL_ORD_ID 58442      cb8895_c4/f1p0/2063                                                                                                                                            | 243  | 1916 | 55   | 244  | 343  | 2014 | 25   | 214  |
| cb8564_c13084/f1p2/3143 | gnl BL_ORD_ID 17146      cb8564_c9739/f5p4/3281<br>isoform=cb8564_c13084;full_length_coverage=1;non_full_length_coverage=2;isoform_length=3143;expected_                                | 1365 | 3143 | 11   | 1365 | 1474 | 3252 | 1    | 1354 |

|                          |                                                                                                                                                                          |      |      |      |      |      |      |      |      |  |
|--------------------------|--------------------------------------------------------------------------------------------------------------------------------------------------------------------------|------|------|------|------|------|------|------|------|--|
| accuracy=0.996           | curacy=0.996                                                                                                                                                             |      |      |      |      |      |      |      |      |  |
| cb8564_c46939/f1p1/2926  | gnl BL_ORD_ID 14471      cb8564_c34518/f1p0/3136<br>isoform=cb8564_c34518;full_length_coverage=1;non_full_length_coverage=0;isoform_length=3136;expected_accuracy=0.991  | 1    | 2134 | 2130 | 2870 | 1    | 2115 | 2219 | 2954 |  |
| cb1508_c6/f1p1/1904      | gnl BL_ORD_ID 63691      cb1508_c5/f1p0/1961                                                                                                                             | 371  | 1845 | 42   | 372  | 478  | 1953 | 5    | 335  |  |
| cb6518_c7/f1p0/2783      | gnl BL_ORD_ID 5044      cb6518_c3/f2p0/3835<br>isoform=cb6518_c3;full_length_coverage=2;non_full_length_coverage=0;isoform_length=3835;expected_accuracy=0.999           | 1    | 1809 | 1807 | 2706 | 12   | 1826 | 2932 | 3835 |  |
| cb8564_c181853/f1p0/2119 | gnl BL_ORD_ID 15315      cb8564_c39014/f1p0/3019<br>isoform=cb8564_c181853;full_length_coverage=1;non_full_length_coverage=0;isoform_length=2119;expected_accuracy=0.997 | 1    | 1339 | 1334 | 2116 | 1    | 1356 | 2213 | 3013 |  |
| cb6691_c13/f1p0/2308     | gnl BL_ORD_ID 3563      cb6691_c6/f2p0/2298<br>isoform=cb6691_c6;full_length_coverage=2;non_full_length_coverage=0;isoform_length=2298;expected_accuracy=1.000           | 1010 | 2135 | 1    | 1010 | 1115 | 2240 | 7    | 1015 |  |
| cb16430_c1/f1p0/1766     | gnl BL_ORD_ID 6757      cb7986_c9/f1p0/2279<br>isoform=cb16430_c1;full_length_coverage=1;non_full_length_coverage=0;isoform_length=1766;expected_accuracy=0.996          | 414  | 1766 | 7    | 417  | 935  | 2276 | 303  | 712  |  |
| cb8564_c23232/f1p3/2540  | gnl BL_ORD_ID 54044      cb8564_c17331/f1p0/3185                                                                                                                         | 16   | 2172 | 2167 | 2517 | 39   | 2196 | 2298 | 2648 |  |
| cb8564_c10007/f3p0/2883  | gnl BL_ORD_ID 11423      cb8564_c12647/f1p0/3038                                                                                                                         | 1    | 2113 | 2112 | 2883 | 48   | 216  | 2262 | 303  |  |

|                                                                                                                     |                                                                                                                                                                                         |      |      |      |      |      |     |      |      |
|---------------------------------------------------------------------------------------------------------------------|-----------------------------------------------------------------------------------------------------------------------------------------------------------------------------------------|------|------|------|------|------|-----|------|------|
| isoform=cb8564_c10007;full_length_coverage=3;non_full_length_coverage=0;isoform_length=2883;expected_accuracy=1.000 | isoform=cb8564_c12647;full_length_coverage=1;non_full_length_coverage=0;isoform_length=3038;expected_accuracy=1.000                                                                     |      |      |      |      |      |     | 2    | 3    |
| cb5471_c11/f1p0/2489                                                                                                | gnl BL_ORD_ID 45003                      cb5471_c7/f1p0/3091<br>isoform=cb5471_c7;full_length_coverage=1;non_full_length_coverage=0;isoform_length=3091;expected_accuracy=0.997         | 1148 | 2555 | 1    | 1147 | 1267 | 272 | 1    | 1146 |
| cb8564_c181853/f1p0/2119                                                                                            | gnl BL_ORD_ID 15496                      cb8564_c47853/f1p0/2927<br>isoform=cb8564_c47853;full_length_coverage=1;non_full_length_coverage=0;isoform_length=2927;expected_accuracy=0.991 | 1    | 1339 | 1334 | 2116 | 1    | 132 | 2149 | 292  |
| cb4674_c10/f2p0/2688                                                                                                | gnl BL_ORD_ID 72846                      cb4674_c72/f1p0/2929                                                                                                                           | 2    | 2046 | 2047 | 2688 | 19   | 203 | 2215 | 287  |
| isoform=cb4674_c10;full_length_coverage=2;non_full_length_coverage=0;isoform_length=2688;expected_accuracy=1.000    |                                                                                                                                                                                         |      |      |      |      |      | 6   |      | 0    |
| cb7016_c17/f1p0/3309                                                                                                | gnl BL_ORD_ID 50253                      cb7016_c9/f1p0/3305                                                                                                                            | 1    | 1955 | 1954 | 3179 | 35   | 199 | 2100 | 332  |
| cb8564_c43779/f1p0/3021                                                                                             |                                                                                                                                                                                         |      |      |      |      |      | 3   |      | 5    |
| isoform=cb8564_c43779;full_length_coverage=1;non_full_length_coverage=0;isoform_length=3021;expected_accuracy=0.993 | gnl BL_ORD_ID 55912                      cb8564_c48681/f1p0/3431                                                                                                                        | 1    | 2345 | 2345 | 3019 | 1    | 234 | 2543 | 321  |
| cb1138_c15/f1p6/3365                                                                                                |                                                                                                                                                                                         |      |      |      |      |      | 0   |      | 6    |
| isoform=cb1138_c15;full_length_coverage=1;non_full_length_coverage=6;isoform_length=3365;expected_accuracy=0.998    | gnl BL_ORD_ID 59178                      cb1138_c38/f1p0/3611                                                                                                                           | 1    | 2847 | 2842 | 3324 | 1    | 284 | 2946 | 342  |
| cb8564_c89404/f1p1/3577                                                                                             | gnl BL_ORD_ID 16525                      cb8564_c74618/f1p0/3734                                                                                                                        | 1    | 2495 | 2490 | 3571 | 50   | 253 | 2650 | 373  |
|                                                                                                                     |                                                                                                                                                                                         |      |      |      |      |      | 2   |      | 9    |



|                                                                                                                                                 |                                                                                                                     |      |      |      |      |      |      |      |      |
|-------------------------------------------------------------------------------------------------------------------------------------------------|---------------------------------------------------------------------------------------------------------------------|------|------|------|------|------|------|------|------|
| isoform=cb8564_c89404;full_length_coverage=1;non_full_length_coverage=1;isoform_length=3577;expected_accuracy=0.993<br>cb8564_c157909/f1p2/2084 | isoform=cb8564_c74618;full_length_coverage=1;non_full_length_coverage=0;isoform_length=3734;expected_accuracy=0.998 |      |      |      |      |      |      | 6    | 4    |
| isoform=cb8564_c157909;full_length_coverage=1;non_full_length_coverage=2;isoform_length=2084;expected_accuracy=0.999<br>cb8617_c4/f1p0/2294     | gnl BL_ORD_ID 58073 cb8564_c88099/f1p2/2499                                                                         | 180  | 2084 | 1    | 179  | 428  | 2323 | 20   | 198  |
| isoform=cb8617_c4;full_length_coverage=1;non_full_length_coverage=0;isoform_length=2294;expected_accuracy=1.000<br>cb2561_c10/f1p0/3960         | gnl BL_ORD_ID 17936 cb8617_c2/f1p0/2817                                                                             | 1    | 1463 | 1462 | 2197 | 38   | 1503 | 2084 | 2817 |
| isoform=cb2561_c10;full_length_coverage=1;non_full_length_coverage=1;isoform_length=2401;expected_accuracy=1.000<br>cb4123_c103/f1p0/1158       | gnl BL_ORD_ID 68615 cb2561_c8/f1p0/3657                                                                             | 120  | 2363 | 2362 | 3551 | 1    | 2247 | 2365 | 3551 |
| isoform=cb8564_c2621;full_length_coverage=1;non_full_length_coverage=1;isoform_length=2401;expected_accuracy=1.000<br>cb5174_c10/f1p1/2391      | gnl BL_ORD_ID 14141 cb8564_c2622/f1p1/2613                                                                          | 1141 | 2401 | 1    | 1146 | 1303 | 2561 | 6    | 1150 |
| isoform=cb4123_c103;full_length_coverage=1;non_full_length_coverage=3;isoform_length=1372;expected_accuracy=1.000<br>cb5174_c12/f1p0/2862       | gnl BL_ORD_ID 41009 cb4123_c54/f1p3/1372                                                                            | 292  | 1178 | 9    | 297  | 463  | 1350 | 1    | 289  |
| isoform=cb5174_c10;full_length_coverage=1;non_full_length_coverage=1;isoform_length=2391;expected_accuracy=0.994<br>cb309_c19/f1p0/1785         | gnl BL_ORD_ID 73354 cb5174_c12/f1p0/2862                                                                            | 133  | 2391 | 1    | 134  | 605  | 2862 | 1    | 134  |
|                                                                                                                                                 | gnl BL_ORD_ID 38927 cb309_c3/f2p2/4443                                                                              | 1    | 1335 | 1336 | 1785 | 2406 | 374  | 3956 | 440  |

|                                                                                                                      |                                                                                                                                                                           |      |      |      |      |      |      |      |      |     |
|----------------------------------------------------------------------------------------------------------------------|---------------------------------------------------------------------------------------------------------------------------------------------------------------------------|------|------|------|------|------|------|------|------|-----|
| isoform=cb309_c19;full_length_coverage=1;non_full_length_coverage=0;isoform_length=1785;expected_accuracy=0.996      | isoform=cb309_c3;full_length_coverage=2;non_full_length_coverage=2;isoform_length=4443;expected_accuracy=1.000                                                            |      |      |      |      |      |      | 0    |      | 5   |
| cb8564_c21439/f1p0/2587                                                                                              | gnl BL_ORD_ID 12770      cb8564_c160685/f1p8/2891<br>isoform=cb8564_c160685;full_length_coverage=1;non_full_length_coverage=8;isoform_length=2891;expected_accuracy=0.993 | 1226 | 2572 | 1    | 1228 | 1352 | 269  | 8    | 1    | 123 |
| cb8118_c4/f2p0/1036                                                                                                  | gnl BL_ORD_ID 7307      cb8118_c3/f3p0/2457<br>isoform=cb8118_c3;full_length_coverage=3;non_full_length_coverage=0;isoform_length=2457;expected_accuracy=0.999            | 105  | 1030 | 3    | 105  | 1530 | 245  | 4    | 20   | 116 |
| cb8564_c178226/f1p0/2728                                                                                             | gnl BL_ORD_ID 56624      cb8564_c49356/f1p0/3133                                                                                                                          | 1284 | 2728 | 1    | 1288 | 1387 | 285  | 0    | 1    | 128 |
| isoform=cb8564_c178226;full_length_coverage=1;non_full_length_coverage=0;isoform_length=2728;expected_accuracy=0.998 |                                                                                                                                                                           |      |      |      |      |      |      |      |      | 3   |
| cb8564_c45864/f1p0/2965                                                                                              | gnl BL_ORD_ID 56381      cb8564_c75626/f1p2/3199                                                                                                                          | 16   | 2115 | 2113 | 2601 | 16   | 2116 | 2611 |      | 309 |
|                                                                                                                      | gnl BL_ORD_ID 12229      cb8564_c12514/f1p0/2626<br>isoform=cb8564_c12514;full_length_coverage=1;non_full_length_coverage=0;isoform_length=2626;expected_accuracy=0.997   | 1    | 1673 | 1671 | 2493 | 14   | 167  | 9    | 1779 | 262 |
| cb8564_c52246/f1p1/2752                                                                                              |                                                                                                                                                                           |      |      |      |      |      |      |      |      | 6   |
| cb8564_c73853/f1p0/2443                                                                                              | gnl BL_ORD_ID 19163      cb8564_c79821/f1p0/2692<br>isoform=cb8564_c79821;full_length_coverage=1;non_full_length_coverage=0;isoform_length=2692;expected_accuracy=0.995   | 1    | 1281 | 1276 | 2352 | 82   | 133  | 5    | 1615 | 269 |
| isoform=cb8564_c73853;full_length_coverage=1;non_full_length_coverage=0;isoform_length=2443;expected_accuracy=1.000  |                                                                                                                                                                           |      |      |      |      |      |      |      |      | 2   |
| cb8564_c51376/f1p3/3179                                                                                              | gnl BL_ORD_ID 15193      cb8564_c42308/f1p5/3192                                                                                                                          | 765  | 3057 | 8    | 768  | 888  | 318  | 10   |      | 785 |

|                                                                                                                      |                                                                                                                      |     |      |      |      |      |      |      |     |   |  |   |
|----------------------------------------------------------------------------------------------------------------------|----------------------------------------------------------------------------------------------------------------------|-----|------|------|------|------|------|------|-----|---|--|---|
|                                                                                                                      | isoform=cb8564_c42308;full_length_coverage=1;non_full_length_coverage=5;isoform_length=3192;expected_accuracy=0.995  |     |      |      |      |      |      |      |     | 7 |  |   |
| cb2929_c8/f1p0/1889                                                                                                  | gnl BL_ORD_ID 38874      cb2929_c20/f2p4/2085                                                                        |     |      |      |      |      |      |      |     |   |  |   |
| isoform=cb2929_c8;full_length_coverage=1;non_full_length_coverage=0;isoform_length=1889;expected_accuracy=0.998      | isoform=cb2929_c20;full_length_coverage=2;non_full_length_coverage=4;isoform_length=2085;expected_accuracy=1.000     | 1   | 1361 | 1357 | 1889 | 3    | 137  | 1548 | 208 | 1 |  | 0 |
| cb2640_c3/f2p1/3206                                                                                                  | gnl BL_ORD_ID 68659      cb2640_c11/f1p0/3319                                                                        |     |      |      |      |      |      |      |     |   |  |   |
| isoform=cb2640_c3;full_length_coverage=2;non_full_length_coverage=1;isoform_length=3206;expected_accuracy=0.998      |                                                                                                                      | 334 | 3205 | 9    | 335  | 459  | 333  | 1    | 353 | 1 |  |   |
| cb8564_c147009/f3p4/1975                                                                                             | gnl BL_ORD_ID 55274      cb8564_c37068/f1p0/2402                                                                     |     |      |      |      |      |      |      |     |   |  |   |
| isoform=cb8564_c147009;full_length_coverage=3;non_full_length_coverage=4;isoform_length=1975;expected_accuracy=1.000 |                                                                                                                      | 251 | 1974 | 73   | 250  | 454  | 217  | 9    | 187 | 8 |  |   |
| cb6719_c84/f32p1/2539                                                                                                | gnl BL_ORD_ID 4663      cb6719_c20/f1p0/3262                                                                         |     |      |      |      |      |      |      |     |   |  |   |
| isoform=cb6719_c84;full_length_coverage=32;non_full_length_coverage=1;isoform_length=2539;expected_accuracy=1.000    | isoform=cb6719_c20;full_length_coverage=1;non_full_length_coverage=0;isoform_length=3262;expected_accuracy=0.996     | 1   | 1472 | 1471 | 2493 | 647  | 2119 | 2240 | 326 |   |  | 2 |
| cb8564_c110147/f1p0/3399                                                                                             | gnl BL_ORD_ID 11650      cb8564_c152526/f1p6/3802                                                                    |     |      |      |      |      |      |      |     |   |  |   |
| isoform=cb8564_c110147;full_length_coverage=1;non_full_length_coverage=0;isoform_length=3399;expected_accuracy=0.999 | isoform=cb8564_c152526;full_length_coverage=1;non_full_length_coverage=6;isoform_length=3802;expected_accuracy=0.999 | 1   | 2986 | 2987 | 3399 | 9    | 301  | 3282 | 369 | 5 |  | 4 |
| cb8564_c40598/f1p4/3119                                                                                              | gnl BL_ORD_ID 57017      cb8564_c80370/f1p0/3493                                                                     |     |      |      |      |      |      |      |     |   |  |   |
|                                                                                                                      |                                                                                                                      | 121 | 2732 | 2729 | 3055 | 3085 | 474  | 353  | 27  |   |  |   |
| cb8564_c14758/f1p0/4100                                                                                              | gnl BL_ORD_ID 52768      cb8564_c13351/f1p2/4615                                                                     |     |      |      |      |      |      |      |     |   |  |   |
|                                                                                                                      |                                                                                                                      | 2   | 3050 | 3046 | 3773 | 4    | 304  | 3910 | 463 | 7 |  | 7 |

|                         |                                                                                                                                                                         |      |      |      |      |      |      |      |      |
|-------------------------|-------------------------------------------------------------------------------------------------------------------------------------------------------------------------|------|------|------|------|------|------|------|------|
| cb8564_c48153/f1p0/3083 | gnl BL_ORD_ID 16879      cb8564_c48606/f1p1/3308<br>isoform=cb8564_c48606;full_length_coverage=1;non_full_length_coverage=1;isoform_length=3308;expected_accuracy=0.998 | 13   | 2162 | 2158 | 2879 | 1    | 2151 | 2587 | 3308 |
| cb2686_c3/f1p0/2597     | gnl BL_ORD_ID 38040      cb2686_c5/f1p0/3171<br>isoform=cb2686_c5;full_length_coverage=1;non_full_length_coverage=0;isoform_length=3171;expected_accuracy=0.994         | 1    | 1688 | 1688 | 2590 | 1    | 1687 | 2284 | 3170 |
| cb2737_c64/f1p1/2838    | gnl BL_ORD_ID 38134      cb2737_c22/f1p0/3196<br>isoform=cb2737_c64;full_length_coverage=1;non_full_length_coverage=1;isoform_length=2838;expected_accuracy=0.993       | 1    | 1537 | 1535 | 2838 | 251  | 1763 | 1894 | 3167 |
| cb8564_c44698/f1p5/2843 | gnl BL_ORD_ID 15496      cb8564_c47853/f1p0/2927<br>isoform=cb8564_c44698;full_length_coverage=1;non_full_length_coverage=5;isoform_length=2843;expected_accuracy=0.997 | 1    | 2516 | 2511 | 2826 | 1    | 2494 | 2614 | 2927 |
| cb17420_c1/f1p1/1860    | gnl BL_ORD_ID 55322      cb8564_c38387/f1p0/2341<br>isoform=cb17420_c1;full_length_coverage=1;non_full_length_coverage=1;isoform_length=1860;expected_accuracy=1.000    | 549  | 1860 | 9    | 552  | 657  | 1968 | 18   | 555  |
| cb8564_c45787/f1p3/3310 | gnl BL_ORD_ID 15125      cb8564_c45003/f1p0/4015<br>isoform=cb8564_c45003;full_length_coverage=1;non_full_length_coverage=0;isoform_length=4015;expected_accuracy=0.996 | 1012 | 3270 | 100  | 1011 | 1756 | 4015 | 4    | 915  |
| cb8564_c40764/f1p0/2563 | gnl BL_ORD_ID 13976      cb8564_c43401/f1p2/3025<br>isoform=cb8564_c40764;full_length_coverage=1;non_full_length_coverage=1;isoform_length=3025;expected_accuracy=0.997 | 1    | 2167 | 2162 | 2563 | 1    | 2226 | 2437 | 2841 |

|                                                                                                                                                                                                               |                                                                                                                                                                                                                                                       |     |      |      |      |     |      |      |      |
|---------------------------------------------------------------------------------------------------------------------------------------------------------------------------------------------------------------|-------------------------------------------------------------------------------------------------------------------------------------------------------------------------------------------------------------------------------------------------------|-----|------|------|------|-----|------|------|------|
| ull_length_coverage=0;isoform_length=2563;expected_accuracy=0.997<br>cb1306_c36/f1p0/2164<br>isoform=cb1306_c36;full_length_coverage=1;non_full_length_coverage=0;isoform_length=2164;expected_accuracy=1.000 | ll_length_coverage=2;isoform_length=3025;expected_accuracy=0.995<br>gnl BL_ORD_ID 25326                      cb1306_c10/f1p1/3298<br>isoform=cb1306_c10;full_length_coverage=1;non_full_length_coverage=1;isoform_length=3298;expected_accuracy=1.000 | 1   | 1793 | 1788 | 2164 | 20  | 1808 | 2733 | 3109 |
| cb3747_c11/f1p0/2520<br>isoform=cb3747_c11;full_length_coverage=1;non_full_length_coverage=0;isoform_length=2520;expected_accuracy=0.994                                                                      | gnl BL_ORD_ID 39404                      cb3747_c23/f7p0/2837<br>isoform=cb3747_c23;full_length_coverage=7;non_full_length_coverage=0;isoform_length=2837;expected_accuracy=0.998                                                                     | 1   | 1743 | 1742 | 2520 | 58  | 1825 | 2058 | 2837 |
| cb12_c40/f1p0/4680<br>cb8564_c50881/f1p2/2125<br>isoform=cb8564_c50881;full_length_coverage=1;non_full_length_coverage=2;isoform_length=2125;expected_accuracy=0.994                                          | gnl BL_ORD_ID 61079   cb12_c11/f1p2/4713<br>gnl BL_ORD_ID 55471   cb8564_c42491/f1p0/2564                                                                                                                                                             | 470 | 4507 | 94   | 475  | 659 | 4704 | 2    | 383  |
| cb8564_c107586/f1p1/4059<br>isoform=cb8564_c107586;full_length_coverage=1;non_full_length_coverage=1;isoform_length=4059;expected_accuracy=1.000                                                              | gnl BL_ORD_ID 3345                      cb10480_c36/f1p0/5122<br>isoform=cb10480_c36;full_length_coverage=1;non_full_length_coverage=0;isoform_length=5122;expected_accuracy=0.997                                                                    | 1   | 2878 | 2876 | 3969 | 22  | 2903 | 4031 | 5122 |
| cb8564_c40671/f1p0/2871<br>isoform=cb8564_c40671;full_length_coverage=1;non_full_length_coverage=0;isoform_length=2871;expected_accuracy=0.998                                                                | gnl BL_ORD_ID 55939   cb8564_c49630/f1p4/3487                                                                                                                                                                                                         | 101 | 2615 | 2615 | 2865 | 398 | 2913 | 3243 | 3493 |
| cb8564_c14548/f1p0/3030                                                                                                                                                                                       | gnl BL_ORD_ID 14058                      cb8564_c23936/f1p0/3016<br>isoform=cb8564_c23936;full_length_coverage=1;non_full_length_coverage=0;isoform_length=3016;expected_accuracy=0.998                                                               | 13  | 1725 | 1723 | 2573 | 4   | 1716 | 2143 | 3016 |

|                                                                                                                  |                                                                                                                  |                           |                      |     |      |      |      |      |     |      |     |
|------------------------------------------------------------------------------------------------------------------|------------------------------------------------------------------------------------------------------------------|---------------------------|----------------------|-----|------|------|------|------|-----|------|-----|
| cb10695_c2/f1p0/1166                                                                                             | ll_length_coverage=0;isoform_length=3016;expected_accuracy=0.995                                                 | gnl BL_ORD_ID 751         | cb10695_c1/f1p0/1931 | 551 | 1166 | 7    | 556  | 1251 | 186 | 75   | 622 |
| isoform=cb10695_c2;full_length_coverage=1;non_full_length_coverage=0;isoform_length=1166;expected_accuracy=1.000 | isoform=cb10695_c1;full_length_coverage=1;non_full_length_coverage=0;isoform_length=1931;expected_accuracy=1.000 |                           |                      |     |      |      |      |      | 6   |      |     |
| cb781_c3/f2p0/4499                                                                                               | gnl BL_ORD_ID 49464                                                                                              | cb781_c6/f1p1/4637        |                      | 160 | 4499 | 1    | 162  | 277  | 461 | 17   | 177 |
| isoform=cb781_c3;full_length_coverage=2;non_full_length_coverage=0;isoform_length=4499;expected_accuracy=0.996   |                                                                                                                  |                           |                      |     |      |      |      |      | 4   |      |     |
| cb8564_c50128/f1p0/4343                                                                                          | gnl BL_ORD_ID 55207                                                                                              | cb8564_c35399/f1p0/4553   |                      | 297 | 4077 | 24   | 301  | 400  | 418 | 11   | 281 |
|                                                                                                                  |                                                                                                                  |                           |                      |     |      |      |      |      | 0   |      |     |
| cb944_c33/f1p1/3119                                                                                              | gnl BL_ORD_ID 20927                                                                                              | cb944_c35/f1p0/3736       |                      | 1   | 2454 | 2452 | 3119 | 27   | 246 | 3060 | 371 |
| isoform=cb944_c33;full_length_coverage=1;non_full_length_coverage=1;isoform_length=3119;expected_accuracy=1.000  | isoform=cb944_c35;full_length_coverage=1;non_full_length_coverage=0;isoform_length=3736;expected_accuracy=0.999  |                           |                      |     |      |      |      |      | 2   |      | 5   |
| cb4123_c39/f1p0/1394                                                                                             | gnl BL_ORD_ID 41229                                                                                              | cb4123_c16/f2p0/1482      |                      | 287 | 1367 | 7    | 286  | 401  | 148 | 11   | 286 |
| isoform=cb4123_c39;full_length_coverage=1;non_full_length_coverage=0;isoform_length=1394;expected_accuracy=1.000 | isoform=cb4123_c16;full_length_coverage=2;non_full_length_coverage=0;isoform_length=1482;expected_accuracy=1.000 |                           |                      |     |      |      |      |      | 1   |      |     |
| cb8564_c46939/f1p1/2926                                                                                          | gnl BL_ORD_ID 53680                                                                                              | cb8564_c153222/f2p39/3454 |                      | 1   | 2134 | 2130 | 2870 | 7    | 215 | 2255 | 299 |
|                                                                                                                  |                                                                                                                  |                           |                      |     |      |      |      |      | 0   |      | 6   |
| cb5659_c78/f1p0/2309                                                                                             | gnl BL_ORD_ID 47091                                                                                              | cb5659_c59/f1p6/2922      |                      | 105 | 1676 | 1675 | 2137 | 1    | 157 | 2151 | 261 |
|                                                                                                                  | isoform=cb5659_c59;full_length_coverage=1;non_full_length_coverage=6;isoform_length=2922;expected_accuracy=0.997 |                           |                      |     |      |      |      |      | 1   |      | 4   |

|                          |                                                                                                                                                                           |      |      |      |      |      |          |      |          |
|--------------------------|---------------------------------------------------------------------------------------------------------------------------------------------------------------------------|------|------|------|------|------|----------|------|----------|
| cb8564_c117302/f1p0/2004 | gnl BL_ORD_ID 11826      cb8564_c125000/f1p0/2204<br>isoform=cb8564_c125000;full_length_coverage=1;non_full_length_coverage=0;isoform_length=2204;expected_accuracy=0.997 | 433  | 2006 | 55   | 433  | 610  | 218<br>3 | 1    | 379      |
| cb8564_c44698/f1p5/2843  | gnl BL_ORD_ID 14529      cb8564_c44074/f1p1/2922<br>isoform=cb8564_c44698;full_length_coverage=1;non_full_length_coverage=5;isoform_length=2843;expected_accuracy=0.997   | 1    | 2515 | 2511 | 2830 | 1    | 248<br>6 | 2605 | 292<br>2 |
| cb3229_c19/f1p0/2319     | gnl BL_ORD_ID 39753      cb3229_c3/f2p0/2593<br>isoform=cb3229_c19;full_length_coverage=1;non_full_length_coverage=0;isoform_length=2319;expected_accuracy=0.998          | 262  | 2271 | 7    | 261  | 583  | 259<br>3 | 1    | 258      |
| cb2533_c15/f1p0/2210     | gnl BL_ORD_ID 38794      cb2533_c9/f1p0/3092<br>isoform=cb2533_c15;full_length_coverage=1;non_full_length_coverage=0;isoform_length=2210;expected_accuracy=0.998          | 1    | 1179 | 1177 | 2209 | 6    | 1186     | 2060 | 309<br>2 |
| cb8564_c39136/f1p0/3036  | gnl BL_ORD_ID 16681      cb8564_c54233/f1p1/3194<br>isoform=cb8564_c39136;full_length_coverage=1;non_full_length_coverage=0;isoform_length=3036;expected_accuracy=0.998   | 2    | 2089 | 2085 | 3032 | 8    | 2118     | 2245 | 319<br>4 |
| cb3584_c13/f1p0/2550     | gnl BL_ORD_ID 40786      cb3584_c10/f1p1/3385<br>isoform=cb3584_c10;full_length_coverage=1;non_full_length_coverage=1;isoform_length=3385;expected_accuracy=0.992         | 1    | 1613 | 1612 | 2533 | 1    | 1611     | 1713 | 263<br>1 |
| cb3542_c12/f1p0/3330     | gnl BL_ORD_ID 40875      cb3542_c2/f2p3/3510<br>isoform=cb3542_c2;full_length_coverage=2;non_full_length_coverage=0;isoform_length=3510;expected_accuracy=0.998           | 1128 | 3296 | 1    | 1133 | 1345 | 351<br>0 | 31   | 1163     |

|                                                                                                                                                    |                                                                                                                                                                                         |      |      |      |      |      |      |      |      |  |
|----------------------------------------------------------------------------------------------------------------------------------------------------|-----------------------------------------------------------------------------------------------------------------------------------------------------------------------------------------|------|------|------|------|------|------|------|------|--|
|                                                                                                                                                    | ngth_coverage=3;isoform_length=3510;expected_accuracy=0.997                                                                                                                             |      |      |      |      |      |      |      |      |  |
| cb8564_c72680/f1p0/2685                                                                                                                            | gnl BL_ORD_ID 52842 cb8564_c15468/f1p0/3015                                                                                                                                             | 1    | 1735 | 1730 | 2604 | 32   | 1766 | 1945 | 2819 |  |
| cb8564_c38035/f1p0/2770                                                                                                                            | gnl BL_ORD_ID 55433 cb8564_c41572/f1p1/3265                                                                                                                                             | 1    | 2035 | 2033 | 2756 | 1    | 2030 | 2219 | 2946 |  |
| cb10912_c3/f1p0/1030<br>isoform=cb10912_c3;full_length_coverage=1;non_full_length_coverage=0;isoform_length=1030;expected_accuracy=0.997           | gnl BL_ORD_ID 2406                      cb10912_c7/f1p0/1564<br>isoform=cb10912_c7;full_length_coverage=1;non_full_length_coverage=0;isoform_length=1564;expected_accuracy=1.000        | 220  | 1025 | 33   | 223  | 759  | 1564 | 1    | 195  |  |
| cb8564_c148448/f2p13/3821<br>isoform=cb8564_c148448;full_length_coverage=2;non_full_length_coverage=13;isoform_length=3821;expected_accuracy=0.995 | gnl BL_ORD_ID 64326 cb14859_c10/f1p0/5042                                                                                                                                               | 108  | 1937 | 1935 | 3756 | 1    | 1830 | 3004 | 4825 |  |
| cb8564_c88853/f1p0/2988                                                                                                                            | gnl BL_ORD_ID 14537                      cb8564_c36204/f3p0/3065<br>isoform=cb8564_c36204;full_length_coverage=3;non_full_length_coverage=0;isoform_length=3065;expected_accuracy=0.997 | 1324 | 2748 | 1    | 1328 | 1643 | 3065 | 50   | 1377 |  |
| cb500_c53/f1p0/3672                                                                                                                                | gnl BL_ORD_ID 72245 cb500_c44/f1p0/3962                                                                                                                                                 | 114  | 1936 | 1935 | 3471 | 66   | 1888 | 2351 | 3887 |  |
| cb3046_c12/f1p0/2338                                                                                                                               | gnl BL_ORD_ID 37103                      cb3046_c0/f6p0/2414<br>isoform=cb3046_c0;full_length_coverage=6;non_full_length_coverage=0;isoform_length=2414;expected_accuracy=1.000         | 1    | 2018 | 2014 | 2272 | 36   | 2053 | 2155 | 2412 |  |
| cb8564_c45596/f1p1/3430                                                                                                                            | gnl BL_ORD_ID 55405 cb8564_c40823/f1p2/3537                                                                                                                                             | 112  | 2780 | 2775 | 3379 | 1    | 2669 | 2788 | 3392 |  |



|                          |                                                                                                                                                                           |     |      |      |      |     |      |      |      |
|--------------------------|---------------------------------------------------------------------------------------------------------------------------------------------------------------------------|-----|------|------|------|-----|------|------|------|
| cb8564_c35567/f2p1/2669  | gnl BL_ORD_ID 15917      cb8564_c52863/f1p0/2866<br>isoform=cb8564_c52863;full_length_coverage=1;non_full_length_coverage=0;isoform_length=2866;expected_accuracy=0.997   | 1   | 1355 | 1355 | 2579 | 2   | 1352 | 1640 | 2866 |
| cb12714_c29/f1p2/1583    | gnl BL_ORD_ID 13830      cb8564_c188097/f1p0/2552<br>isoform=cb8564_c188097;full_length_coverage=1;non_full_length_coverage=0;isoform_length=2552;expected_accuracy=0.996 | 1   | 1296 | 1293 | 1590 | 1   | 1296 | 2255 | 2552 |
| cb3955_c12/f1p0/1586     | gnl BL_ORD_ID 39173      cb3955_c11/f1p0/2530<br>isoform=cb3955_c12;full_length_coverage=1;non_full_length_coverage=0;isoform_length=1586;expected_accuracy=1.000         | 1   | 1275 | 1273 | 1586 | 22  | 1294 | 2152 | 2463 |
| cb8564_c9854/f2p0/3197   | gnl BL_ORD_ID 13496      cb8564_c18927/f1p0/3935<br>isoform=cb8564_c9854;full_length_coverage=2;non_full_length_coverage=0;isoform_length=3197;expected_accuracy=1.000    | 1   | 2495 | 2490 | 3193 | 154 | 2636 | 3234 | 3935 |
| cb8564_c10736/f3p10/3904 | gnl BL_ORD_ID 19170      cb8564_c9757/f2p7/4230<br>isoform=cb8564_c10736;full_length_coverage=3;non_full_length_coverage=10;isoform_length=3904;expected_accuracy=0.998   | 101 | 3264 | 3265 | 3904 | 3   | 3162 | 3573 | 4212 |
| cb8564_c2223/f1p0/2047   | gnl BL_ORD_ID 53847      cb8564_c2458/f1p0/2930                                                                                                                           | 434 | 2055 | 8    | 439  | 886 | 2507 | 12   | 443  |
| cb8564_c51035/f2p2/4216  | gnl BL_ORD_ID 14314      cb8564_c45827/f2p2/4435<br>isoform=cb8564_c51035;full_length_coverage=2;non_full_length_coverage=2;isoform_length=4216;expected_accuracy=0.999   | 15  | 3261 | 3257 | 4160 | 1   | 3255 | 3520 | 4426 |

|                                                                                                                                            |                                                                                                                                                                   |     |      |      |      |      |      |      |      |
|--------------------------------------------------------------------------------------------------------------------------------------------|-------------------------------------------------------------------------------------------------------------------------------------------------------------------|-----|------|------|------|------|------|------|------|
| cb1333_c101/f1p0/1395<br>isoform=cb1333_c101;full_length_coverage=1;non_full_length_coverage=0;isoform_length=1395;expected_accuracy=0.997 | gnl BL_ORD_ID 26022      cb1333_c19/f2p1/4599<br>isoform=cb1333_c19;full_length_coverage=2;non_full_length_coverage=1;isoform_length=4599;expected_accuracy=0.999 | 146 | 1395 | 6    | 150  | 3314 | 4562 | 1    | 144  |
| cb8564_c127627/f1p0/2239                                                                                                                   | gnl BL_ORD_ID 54524      cb8564_c125248/f1p0/3365                                                                                                                 | 166 | 2218 | 1    | 168  | 1048 | 3103 | 20   | 187  |
| cb12446_c3/f1p0/1412<br>isoform=cb12446_c3;full_length_coverage=1;non_full_length_coverage=0;isoform_length=1412;expected_accuracy=1.000   | gnl BL_ORD_ID 54707      cb8564_c157184/f1p3/4810                                                                                                                 | 109 | 1412 | 1    | 111  | 596  | 1900 | 1    | 111  |
| cb3601_c21/f1p1/1026<br>isoform=cb3601_c21;full_length_coverage=1;non_full_length_coverage=1;isoform_length=1026;expected_accuracy=1.000   | gnl BL_ORD_ID 70508      cb3601_c11/f1p0/2518                                                                                                                     | 187 | 991  | 1    | 189  | 1637 | 2447 | 96   | 282  |
| cb5199_c13/f1p2/3718                                                                                                                       | gnl BL_ORD_ID 73617      cb5199_c9/f1p0/4034                                                                                                                      | 1   | 3184 | 3184 | 3700 | 1    | 3185 | 3461 | 3978 |
| cb3143_c17/f1p0/2870<br>isoform=cb3143_c17;full_length_coverage=1;non_full_length_coverage=0;isoform_length=2870;expected_accuracy=0.993   | gnl BL_ORD_ID 37815      cb3143_c7/f1p1/3040<br>isoform=cb3143_c7;full_length_coverage=1;non_full_length_coverage=1;isoform_length=3040;expected_accuracy=1.000   | 162 | 2870 | 1    | 163  | 321  | 3021 | 21   | 182  |
| cb938_c6/f2p5/3513<br>isoform=cb938_c6;full_length_coverage=2;non_full_length_coverage=5;isoform_length=3513;expected_accuracy=1.000       | gnl BL_ORD_ID 59101      cb938_c9/f1p0/4170                                                                                                                       | 1   | 2565 | 2565 | 3466 | 1    | 2565 | 3262 | 4163 |
| cb9549_c8/f1p0/1542<br>isoform=cb9549_c8;full_length_coverage=1;non_full_length_coverage=0;isoform_length=1542;expected_accuracy=0.999     | gnl BL_ORD_ID 21588      cb9549_c0/f3p0/1849<br>isoform=cb9549_c0;full_length_coverage=3;non_full_length_coverage=0;isoform_length=1849;expected_accuracy=0.999   | 114 | 1542 | 1    | 115  | 345  | 1777 | 60   | 174  |

|                                                                                                                                                                                                                                                                                                                                                                                                                                                                                                                                                                                                                                                                                                       |                                                                                                                                                                                                                                                                                                                                                                                                                                                                                                                                                                                                                                                                                                                                                                                                                          |                                  |                                              |                                       |                                           |                                     |                                         |                                       |                                        |
|-------------------------------------------------------------------------------------------------------------------------------------------------------------------------------------------------------------------------------------------------------------------------------------------------------------------------------------------------------------------------------------------------------------------------------------------------------------------------------------------------------------------------------------------------------------------------------------------------------------------------------------------------------------------------------------------------------|--------------------------------------------------------------------------------------------------------------------------------------------------------------------------------------------------------------------------------------------------------------------------------------------------------------------------------------------------------------------------------------------------------------------------------------------------------------------------------------------------------------------------------------------------------------------------------------------------------------------------------------------------------------------------------------------------------------------------------------------------------------------------------------------------------------------------|----------------------------------|----------------------------------------------|---------------------------------------|-------------------------------------------|-------------------------------------|-----------------------------------------|---------------------------------------|----------------------------------------|
| ngth_coverage=0;isoform_length=1542;expected_accuracy=1.000<br>cb8564_c11675/f1p0/3333<br>isoform=cb8564_c11675;full_length_coverage=1;non_full_length_coverage=0;isoform_length=3333;expected_accuracy=0.999<br>cb8564_c90372/f1p0/2157<br>isoform=cb8564_c90372;full_length_coverage=1;non_full_length_coverage=0;isoform_length=2157;expected_accuracy=0.994<br>cb3213_c14/f1p0/2247<br>cb4258_c0/f4p0/2993<br>isoform=cb4258_c0;full_length_coverage=4;non_full_length_coverage=0;isoform_length=2993;expected_accuracy=1.000<br>cb5900_c97/f1p0/2618<br>isoform=cb5900_c97;full_length_coverage=1;non_full_length_coverage=0;isoform_length=2618;expected_accuracy=0.993<br>cb13042_c4/f1p0/1356 | ngth_coverage=0;isoform_length=1849;expected_accuracy=0.999<br>gnl BL_ORD_ID 54298 cb8564_c22041/f1p0/3578<br>gnl BL_ORD_ID 19195 cb8564_c90437/f1p0/2888<br>isoform=cb8564_c90437;full_length_coverage=1;non_full_length_coverage=0;isoform_length=2888;expected_accuracy=0.995<br>gnl BL_ORD_ID 40431 cb3213_c4/f4p0/2414<br>isoform=cb3213_c4;full_length_coverage=4;non_full_length_coverage=0;isoform_length=2414;expected_accuracy=0.995<br>gnl BL_ORD_ID 43235 cb4258_c6/f1p0/3338<br>isoform=cb4258_c6;full_length_coverage=1;non_full_length_coverage=0;isoform_length=3338;expected_accuracy=0.999<br>gnl BL_ORD_ID 74605 cb5900_c77/f1p0/3189<br>gnl BL_ORD_ID 25127 cb13042_c0/f7p0/1302<br>isoform=cb13042_c0;full_length_coverage=7;non_full_length_coverage=0;isoform_length=1302;expected_accuracy=1.000 | 1<br>1<br>100<br>147<br>1<br>321 | 1827<br>1444<br>2198<br>2993<br>1833<br>1300 | 1824<br>1442<br>1<br>146<br>1830<br>5 | 3262<br>2157<br>100<br>485<br>2615<br>322 | 44<br>91<br>316<br>485<br>64<br>164 | 187<br>153<br>241<br>333<br>188<br>1146 | 2057<br>2133<br>92<br>18<br>2357<br>1 | 349<br>284<br>191<br>162<br>314<br>307 |
|-------------------------------------------------------------------------------------------------------------------------------------------------------------------------------------------------------------------------------------------------------------------------------------------------------------------------------------------------------------------------------------------------------------------------------------------------------------------------------------------------------------------------------------------------------------------------------------------------------------------------------------------------------------------------------------------------------|--------------------------------------------------------------------------------------------------------------------------------------------------------------------------------------------------------------------------------------------------------------------------------------------------------------------------------------------------------------------------------------------------------------------------------------------------------------------------------------------------------------------------------------------------------------------------------------------------------------------------------------------------------------------------------------------------------------------------------------------------------------------------------------------------------------------------|----------------------------------|----------------------------------------------|---------------------------------------|-------------------------------------------|-------------------------------------|-----------------------------------------|---------------------------------------|----------------------------------------|

|                                                                                                                                                  |                                                                                                                                                                      |     |      |      |      |      |          |      |          |
|--------------------------------------------------------------------------------------------------------------------------------------------------|----------------------------------------------------------------------------------------------------------------------------------------------------------------------|-----|------|------|------|------|----------|------|----------|
| cb3213_c12/f1p0/2190<br>isoform=cb3213_c12;full_length_coverage=1;non_full_length_coverage=0;isoform_length=2190;expected_accuracy=0.995         | gnl BL_ORD_ID 70971 cb3213_c21/f1p0/2529                                                                                                                             | 100 | 2173 | 1    | 100  | 304  | 238<br>4 | 80   | 179      |
| cb12972_c38/f1p0/1837<br>isoform=cb12972_c38;full_length_coverage=1;non_full_length_coverage=0;isoform_length=1837;expected_accuracy=0.992       | gnl BL_ORD_ID 14141 cb8564_c2622/f1p1/2613<br>isoform=cb8564_c2622;full_length_coverage=1;non_full_length_coverage=1;isoform_length=2613;expected_accuracy=0.996     | 247 | 1837 | 45   | 249  | 1023 | 2611     | 1    | 205      |
| cb8564_c113778/f1p0/2109<br>isoform=cb8564_c113778;full_length_coverage=1;non_full_length_coverage=0;isoform_length=2109;expected_accuracy=0.997 | gnl BL_ORD_ID 12337 cb8564_c129133/f1p1/2874<br>isoform=cb8564_c129133;full_length_coverage=1;non_full_length_coverage=1;isoform_length=2874;expected_accuracy=0.997 | 1   | 1144 | 1141 | 2109 | 148  | 128<br>9 | 1905 | 287<br>3 |
| cb8564_c44698/f1p5/2843<br>isoform=cb8564_c44698;full_length_coverage=1;non_full_length_coverage=5;isoform_length=2843;expected_accuracy=0.997   | gnl BL_ORD_ID 56719 cb8564_c54250/f1p3/3063                                                                                                                          | 1   | 2516 | 2511 | 2827 | 1    | 251<br>2 | 2682 | 300<br>0 |
| cb4819_c0/f3p0/1276<br>isoform=cb4819_c0;full_length_coverage=3;non_full_length_coverage=0;isoform_length=1276;expected_accuracy=1.000           | gnl BL_ORD_ID 44405 cb4819_c1/f2p0/3178<br>isoform=cb4819_c1;full_length_coverage=2;non_full_length_coverage=0;isoform_length=3178;expected_accuracy=1.000           | 357 | 1276 | 57   | 359  | 2257 | 317<br>6 | 1    | 303      |
| cb2488_c1/f1p0/3123<br>isoform=cb2488_c1;full_length_coverage=1;non_full_length_coverage=0;isoform_length=3123;expected_accuracy=0.993           | gnl BL_ORD_ID 38533 cb2533_c16/f1p0/4039<br>isoform=cb2533_c16;full_length_coverage=1;non_full_length_coverage=0;isoform_length=4039;expected_accuracy=0.994         | 674 | 3123 | 89   | 675  | 2836 | 386      | 4039 | 345<br>1 |
| cb297_c7/f1p0/4453<br>isoform=cb297_c7;full_length_coverage=1;non_full_length_coverage=0;isoform_length=4453;expected_accuracy=0.997             | gnl BL_ORD_ID 36751 cb297_c16/f3p1/4779<br>isoform=cb297_c16;full_length_coverage=3;non_full_length_coverage=0;isoform_length=4779;expected_accuracy=0.997           | 2   | 2873 | 2872 | 4453 | 43   | 291<br>2 | 3196 | 477<br>9 |

|                                                                                                                                                                                                                                                                                                                                                  |                                                                                                                                                                                                                                            |      |      |      |      |      |          |      |          |
|--------------------------------------------------------------------------------------------------------------------------------------------------------------------------------------------------------------------------------------------------------------------------------------------------------------------------------------------------|--------------------------------------------------------------------------------------------------------------------------------------------------------------------------------------------------------------------------------------------|------|------|------|------|------|----------|------|----------|
| gth_coverage=0;isoform_length=4453;expected_accuracy=0.997<br>cb5382_c3/f1p0/2584<br>isoform=cb5382_c3;full_length_coverage=1;non_full_length_coverage=0;isoform_length=2584;expected_accuracy=0.995<br>cb7519_c21/f1p0/2280<br>isoform=cb7519_c21;full_length_coverage=1;non_full_length_coverage=0;isoform_length=2280;expected_accuracy=0.994 | gnl BL_ORD_ID 44422                      cb5382_c2/f1p0/2750<br>isoform=cb5382_c2;full_length_coverage=1;non_full_length_coverage=0;isoform_length=2750;expected_accuracy=1.000                                                            | 1117 | 2584 | 1    | 1118 | 1236 | 270<br>7 | 17   | 1134     |
| cb454_c24/f1p0/2537                                                                                                                                                                                                                                                                                                                              | gnl BL_ORD_ID 50569      cb7519_c6/f1p0/2438<br><br>gnl BL_ORD_ID 42146                      cb454_c7/f1p0/2374<br>isoform=cb454_c7;full_length_coverage=1;non_full_length_coverage=0;isoform_length=2374;expected_accuracy=0.997          | 11   | 1593 | 1593 | 2280 | 1    | 158<br>7 | 1712 | 239<br>9 |
| cb8564_c41507/f1p0/2100<br>isoform=cb8564_c41507;full_length_coverage=1;non_full_length_coverage=0;isoform_length=2100;expected_accuracy=0.998<br>cb8980_c2/f4p1/1909<br>isoform=cb8980_c2;full_length_coverage=4;non_full_length_coverage=1;isoform_length=1909;expected_accuracy=1.000                                                         | gnl BL_ORD_ID 14339                      cb8564_c36260/f1p0/3626<br>isoform=cb8564_c36260;full_length_coverage=1;non_full_length_coverage=0;isoform_length=3626;expected_accuracy=0.996                                                    | 225  | 2264 | 1    | 224  | 331  | 237<br>4 | 1    | 224      |
| cb8564_c41507/f1p0/2100<br>isoform=cb8564_c41507;full_length_coverage=1;non_full_length_coverage=0;isoform_length=2100;expected_accuracy=0.998<br>cb8980_c2/f4p1/1909<br>isoform=cb8980_c2;full_length_coverage=4;non_full_length_coverage=1;isoform_length=1909;expected_accuracy=1.000                                                         | gnl BL_ORD_ID 14339                      cb8564_c36260/f1p0/3626<br>isoform=cb8564_c36260;full_length_coverage=1;non_full_length_coverage=0;isoform_length=3626;expected_accuracy=0.996                                                    | 1    | 1657 | 1655 | 2100 | 1133 | 279<br>2 | 3178 | 362<br>3 |
| cb332_c3/f1p1/4544                                                                                                                                                                                                                                                                                                                               | gnl BL_ORD_ID 59418      cb8980_c4/f1p1/2063                                                                                                                                                                                               | 561  | 1909 | 63   | 565  | 672  | 202<br>0 | 16   | 518      |
| cb8564_c36145/f1p0/2868                                                                                                                                                                                                                                                                                                                          | gnl BL_ORD_ID 69566      cb332_c6/f1p0/5252<br><br>gnl BL_ORD_ID 14058                      cb8564_c23936/f1p0/3016<br>isoform=cb8564_c23936;full_length_coverage=1;non_full_length_coverage=0;isoform_length=3016;expected_accuracy=1.000 | 1989 | 4512 | 1    | 1994 | 2726 | 525<br>3 | 9    | 201<br>4 |
|                                                                                                                                                                                                                                                                                                                                                  |                                                                                                                                                                                                                                            | 1    | 1707 | 1705 | 2578 | 8    | 171<br>6 | 2143 | 301<br>6 |

|                         |                                                                                                                     |                     |                          |      |      |      |      |      |      |      |      |
|-------------------------|---------------------------------------------------------------------------------------------------------------------|---------------------|--------------------------|------|------|------|------|------|------|------|------|
|                         | ll_length_coverage=0;isoform_length=3016;expected_accuracy=0.995                                                    |                     |                          |      |      |      |      |      |      |      |      |
| cb500_c21/f1p0/3434     | isoform=cb500_c21;full_length_coverage=1;non_full_length_coverage=0;isoform_length=3434;expected_accuracy=0.996     | gnl BL_ORD_ID 72251 | cb500_c68/f1p0/4152      | 176  | 3260 | 1    | 180  | 961  | 4045 | 124  | 301  |
| cb8564_c18491/f2p0/4707 | isoform=cb8564_c18491;full_length_coverage=2;non_full_length_coverage=0;isoform_length=4707;expected_accuracy=0.996 | gnl BL_ORD_ID 34665 | cb18654_c6/f1p0/5389     | 1    | 3997 | 3998 | 4699 | 61   | 4063 | 4687 | 5389 |
| cb8564_c5054/f1p0/2981  | isoform=cb8564_c5054;full_length_coverage=1;non_full_length_coverage=0;isoform_length=2981;expected_accuracy=0.996  | gnl BL_ORD_ID 15840 | cb8564_c5053/f2p0/3158   | 1    | 2438 | 2437 | 2980 | 55   | 2485 | 2615 | 3158 |
| cb234_c1/f1p1/4574      | isoform=cb234_c1;full_length_coverage=1;non_full_length_coverage=1;isoform_length=4574;expected_accuracy=0.997      | gnl BL_ORD_ID 38043 | cb234_c4/f1p1/4715       | 4    | 4236 | 4231 | 4572 | 5    | 4241 | 4358 | 4699 |
| cb8564_c71815/f1p0/2753 | isoform=cb8564_c71815;full_length_coverage=1;non_full_length_coverage=3;isoform_length=2795;expected_accuracy=0.991 | gnl BL_ORD_ID 10862 | cb8564_c106708/f1p3/2795 | 1    | 1377 | 1372 | 2460 | 53   | 1460 | 1694 | 2787 |
| cb548_c58/f1p2/3035     | isoform=cb548_c109;full_length_coverage=1;non_full_length_coverage=0;isoform_length=3280;expected_accuracy=0.996    | gnl BL_ORD_ID 46779 | cb548_c109/f1p0/3280     | 1326 | 3053 | 1    | 1329 | 1551 | 3279 | 12   | 1340 |

|                                                                                                                                          |                                                                                                                                                                    |     |      |      |      |      |          |      |          |
|------------------------------------------------------------------------------------------------------------------------------------------|--------------------------------------------------------------------------------------------------------------------------------------------------------------------|-----|------|------|------|------|----------|------|----------|
| cb395_c4/f1p0/3249                                                                                                                       | gnl BL_ORD_ID 69601 cb395_c5/f1p0/3523                                                                                                                             | 14  | 2595 | 2596 | 3115 | 1    | 258<br>2 | 2756 | 327<br>5 |
| cb3427_c3/f1p0/3550                                                                                                                      | gnl BL_ORD_ID 39943 cb3427_c4/f1p0/3709<br>isoform=cb3427_c4;full_length_coverage=1;non_full_length_coverage=0;isoform_length=3709;expected_accuracy=0.993         | 1   | 3138 | 3137 | 3486 | 1    | 313<br>2 | 3351 | 369<br>8 |
| cb12714_c29/f1p2/1583                                                                                                                    | gnl BL_ORD_ID 17272 cb8564_c91851/f1p1/2644<br>isoform=cb8564_c91851;full_length_coverage=1;non_full_length_coverage=1;isoform_length=2644;expected_accuracy=0.993 | 1   | 1296 | 1293 | 1591 | 1    | 129<br>6 | 2345 | 264<br>4 |
| cb2206_c10/f1p0/2608                                                                                                                     | gnl BL_ORD_ID 36911 cb2206_c6/f1p0/3298<br>isoform=cb2206_c6;full_length_coverage=1;non_full_length_coverage=0;isoform_length=3298;expected_accuracy=0.995         | 1   | 2214 | 2213 | 2605 | 1    | 220<br>6 | 2905 | 329<br>7 |
| cb7560_c35/f1p1/2004<br>isoform=cb7560_c35;full_length_coverage=1;non_full_length_coverage=1;isoform_length=2004;expected_accuracy=0.994 | gnl BL_ORD_ID 50597 cb7560_c32/f1p0/2834                                                                                                                           | 1   | 1446 | 1444 | 1972 | 234  | 168<br>1 | 1928 | 245<br>6 |
| cb3814_c30/f1p0/2852                                                                                                                     | gnl BL_ORD_ID 71529 cb3814_c17/f1p0/3106                                                                                                                           | 15  | 1737 | 1735 | 2486 | 4    | 172<br>2 | 2079 | 283<br>0 |
| cb2674_c19/f1p0/3539<br>isoform=cb2674_c19;full_length_coverage=1;non_full_length_coverage=0;isoform_length=3539;expected_accuracy=0.993 | gnl BL_ORD_ID 38975 cb2674_c31/f35p4/3827<br>isoform=cb2674_c31;full_length_coverage=35;non_full_length_coverage=4;isoform_length=3827;expected_accuracy=1.000     | 1   | 2456 | 2457 | 3539 | 141  | 260<br>7 | 2743 | 382<br>7 |
| cb10385_c5/f1p0/1837                                                                                                                     | gnl BL_ORD_ID 48457 cb10385_c3/f1p0/3720                                                                                                                           | 235 | 1663 | 4    | 235  | 2285 | 371<br>3 | 3    | 234      |

|                          |                                                                                                                                                                           |      |      |      |      |      |      |      |      |
|--------------------------|---------------------------------------------------------------------------------------------------------------------------------------------------------------------------|------|------|------|------|------|------|------|------|
| cb8564_c46939/f1p1/2926  | gnl BL_ORD_ID 12440      cb8564_c130435/f1p3/3226<br>isoform=cb8564_c130435;full_length_coverage=1;non_full_length_coverage=3;isoform_length=3226;expected_accuracy=0.994 | 1    | 2134 | 2130 | 2870 | 2    | 2165 | 2271 | 3019 |
| cb4233_c109/f1p3/2092    | gnl BL_ORD_ID 72374      cb4233_c97/f1p1/2296<br>isoform=cb4233_c109;full_length_coverage=1;non_full_length_coverage=3;isoform_length=2092;expected_accuracy=0.994        | 1    | 1522 | 1517 | 2086 | 53   | 1578 | 1702 | 2274 |
| cb8564_c20707/f1p1/3366  | gnl BL_ORD_ID 54353      cb8564_c22866/f1p1/4372<br>isoform=cb8564_c20707;full_length_coverage=1;non_full_length_coverage=1;isoform_length=3366;expected_accuracy=0.993   | 1180 | 3366 | 112  | 1180 | 2108 | 4300 | 1    | 1050 |
| cb8983_c32/f1p0/1686     | gnl BL_ORD_ID 19399      cb8983_c11/f1p0/2136<br>isoform=cb8983_c32;full_length_coverage=1;non_full_length_coverage=0;isoform_length=1686;expected_accuracy=0.992         | 133  | 1686 | 1    | 136  | 581  | 2134 | 1    | 135  |
| cb8564_c109489/f3p0/2914 | gnl BL_ORD_ID 10869      cb8564_c117138/f1p0/4110<br>isoform=cb8564_c109489;full_length_coverage=3;non_full_length_coverage=0;isoform_length=2914;expected_accuracy=1.000 | 1    | 1559 | 1555 | 2914 | 75   | 1627 | 2753 | 4110 |
| cb6238_c4/f1p0/2903      | gnl BL_ORD_ID 5359      cb6238_c5/f1p0/3446<br>isoform=cb6238_c4;full_length_coverage=1;non_full_length_coverage=0;isoform_length=2903;expected_accuracy=0.997            | 13   | 1936 | 1937 | 2890 | 17   | 1895 | 2427 | 3374 |
| cb7478_c5/f1p0/2384      | gnl BL_ORD_ID 8354      cb7478_c8/f3p0/2393<br>isoform=cb7478_c8;full_length_coverage=3;non_full_length_coverage=0;isoform_length=2384;expected_accuracy=0.994            | 12   | 1877 | 1874 | 2250 | 1    | 1863 | 1966 | 2344 |





|                                                                                                                                                |                                                                                                                                            |                         |      |      |      |      |      |      |      |      |
|------------------------------------------------------------------------------------------------------------------------------------------------|--------------------------------------------------------------------------------------------------------------------------------------------|-------------------------|------|------|------|------|------|------|------|------|
| cb8564_c80412/f1p0/2903<br>isoform=cb8564_c80412;full_length_coverage=1;non_full_length_coverage=0;isoform_length=2903;expected_accuracy=0.996 | gnl BL_ORD_ID 18170<br>isoform=cb8564_c88512;full_length_coverage=1;non_full_length_coverage=0;isoform_length=4140;expected_accuracy=0.992 | cb8564_c88512/f1p0/4140 | 1    | 1774 | 1771 | 2903 | 1053 | 2824 | 3011 | 4140 |
| cb18301_c30/f1p0/1075<br>isoform=cb18301_c28;full_length_coverage=1;non_full_length_coverage=0;isoform_length=1300;expected_accuracy=0.995     | gnl BL_ORD_ID 33896<br>isoform=cb18301_c28;full_length_coverage=1;non_full_length_coverage=0;isoform_length=1300;expected_accuracy=0.995   | cb18301_c28/f1p0/1300   | 179  | 1063 | 19   | 184  | 370  | 1254 | 46   | 219  |
| cb3290_c38/f1p0/2345<br>isoform=cb3290_c38;full_length_coverage=1;non_full_length_coverage=0;isoform_length=2345;expected_accuracy=0.996       | gnl BL_ORD_ID 71045<br>cb3290_c173/f1p0/3126                                                                                               | cb3290_c173/f1p0/3126   | 1150 | 2341 | 1    | 1151 | 1632 | 2831 | 319  | 1475 |
| cb7560_c35/f1p1/2004<br>isoform=cb7560_c35;full_length_coverage=1;non_full_length_coverage=1;isoform_length=2004;expected_accuracy=0.994       | gnl BL_ORD_ID 8568<br>isoform=cb7560_c43;full_length_coverage=1;non_full_length_coverage=2;isoform_length=2513;expected_accuracy=0.998     | cb7560_c43/f1p2/2513    | 1    | 1446 | 1444 | 2004 | 223  | 1668 | 1915 | 2475 |
| cb381_c0/f2p0/4859<br>isoform=cb381_c0;full_length_coverage=2;non_full_length_coverage=0;isoform_length=4859;expected_accuracy=0.997           | gnl BL_ORD_ID 40998<br>isoform=cb381_c6;full_length_coverage=1;non_full_length_coverage=0;isoform_length=5381;expected_accuracy=0.996      | cb381_c6/f1p0/5381      | 19   | 3705 | 3704 | 4859 | 1    | 3681 | 4229 | 5380 |
| cb2263_c9/f1p0/2491<br>isoform=cb2263_c5;full_length_coverage=1;non_full_length_coverage=0;isoform_length=3994;expected_accuracy=0.998         | gnl BL_ORD_ID 36791<br>isoform=cb2263_c5;full_length_coverage=1;non_full_length_coverage=0;isoform_length=3994;expected_accuracy=0.998     | cb2263_c5/f1p0/3994     | 1    | 1320 | 1321 | 2361 | 117  | 1436 | 2457 | 3497 |
| cb7181_c10/f1p1/1554<br>isoform=cb7181_c10;full_length_coverage=1;non_full_length_coverage=0;isoform_length=1553;expected_accuracy=0.998       | gnl BL_ORD_ID 3706<br>isoform=cb7181_c9;full_length_coverage=1;non_full_length_coverage=0;isoform_length=1553;expected_accuracy=0.998      | cb7181_c9/f1p1/2607     | 1    | 1058 | 1056 | 1553 | 1    | 1050 | 2110 | 2607 |

|                                                                                                                                                                                                                 |                                                                                                                                                                    |      |      |      |      |      |          |      |          |
|-----------------------------------------------------------------------------------------------------------------------------------------------------------------------------------------------------------------|--------------------------------------------------------------------------------------------------------------------------------------------------------------------|------|------|------|------|------|----------|------|----------|
| length_coverage=1;isoform_length=1554;expected_accuracy=0.994<br>cb8564_c36056/f1p0/2652<br>isoform=cb8564_c36056;full_length_coverage=1;non_full_length_coverage=0;isoform_length=2652;expected_accuracy=0.999 | length_coverage=1;isoform_length=2607;expected_accuracy=0.999<br>gnl BL_ORD_ID 56727 cb8564_c66920/f3p3/2894                                                       | 248  | 2644 | 1    | 251  | 466  | 286<br>3 | 70   | 322      |
| cb8564_c14548/f1p0/3030                                                                                                                                                                                         | gnl BL_ORD_ID 52845 cb8564_c15530/f1p0/3247                                                                                                                        | 13   | 2313 | 2314 | 2657 | 6    | 230<br>6 | 2785 | 312<br>8 |
| cb8564_c123038/f1p0/2682                                                                                                                                                                                        | gnl BL_ORD_ID 15348 cb8564_c25433/f2p0/2642<br>isoform=cb8564_c25433;full_length_coverage=2;non_full_length_coverage=0;isoform_length=2642;expected_accuracy=1.000 | 1245 | 2531 | 10   | 1250 | 1356 | 264<br>2 | 1    | 124<br>1 |
| cb1380_c9/f3p0/2515<br>isoform=cb1380_c9;full_length_coverage=3;non_full_length_coverage=0;isoform_length=2515;expected_accuracy=0.994                                                                          | gnl BL_ORD_ID 61310 cb1380_c37/f1p0/3199                                                                                                                           | 1    | 1680 | 1679 | 2447 | 6    | 170<br>5 | 2358 | 312<br>6 |
| cb8564_c24710/f1p0/2430<br>isoform=cb8564_c24710;full_length_coverage=1;non_full_length_coverage=0;isoform_length=2430;expected_accuracy=0.996                                                                  | gnl BL_ORD_ID 56014 cb8564_c52246/f1p1/2752                                                                                                                        | 14   | 1499 | 1502 | 2430 | 1    | 148<br>9 | 1589 | 249<br>2 |
| cb3143_c8/f1p1/2928<br>isoform=cb3143_c8;full_length_coverage=1;non_full_length_coverage=1;isoform_length=2928;expected_accuracy=0.992                                                                          | gnl BL_ORD_ID 69160 cb3143_c4/f1p0/3643                                                                                                                            | 205  | 2923 | 1    | 206  | 686  | 340<br>2 | 31   | 236      |
| cb3226_c22/f2p0/2434<br>isoform=cb3226_c22;full_length_coverage=2;non_full_length_coverage=1;isoform_length=2434;expected_accuracy=0.999                                                                        | gnl BL_ORD_ID 39676 cb3226_c10/f1p0/3292<br>isoform=cb3226_c10;full_length_coverage=1;non_full_length_coverage=1;isoform_length=3292;expected_accuracy=0.999       | 136  | 2431 | 1    | 138  | 1001 | 329<br>2 | 29   | 165      |

|                                                                                                                                                                                                         |                                                                                                                                                                                                                                                  |      |      |      |      |      |          |      |          |
|---------------------------------------------------------------------------------------------------------------------------------------------------------------------------------------------------------|--------------------------------------------------------------------------------------------------------------------------------------------------------------------------------------------------------------------------------------------------|------|------|------|------|------|----------|------|----------|
| length_coverage=0;isoform_length=2434;expected_accuracy=1.000<br>cb401_c28/f1p0/2163<br>isoform=cb401_c28;full_length_coverage=1;non_full_length_coverage=0;isoform_length=2163;expected_accuracy=0.992 | length_coverage=0;isoform_length=3292;expected_accuracy=0.994<br>gnl BL_ORD_ID 40225                      cb401_c88/f3p0/2402<br>isoform=cb401_c88;full_length_coverage=3;non_full_length_coverage=0;isoform_length=2402;expected_accuracy=0.994 | 317  | 2163 | 4    | 313  | 539  | 237<br>7 | 21   | 329      |
| cb3763_c17/f1p0/2834<br>isoform=cb3763_c17;full_length_coverage=1;non_full_length_coverage=0;isoform_length=2834;expected_accuracy=0.995                                                                | gnl BL_ORD_ID 40108                      cb3763_c16/f1p1/3107<br>isoform=cb3763_c16;full_length_coverage=1;non_full_length_coverage=1;isoform_length=3107;expected_accuracy=0.998                                                                | 1    | 1844 | 1844 | 2834 | 1    | 185<br>0 | 2015 | 300<br>5 |
| cb2947_c9/f1p0/3003<br>isoform=cb2947_c9;full_length_coverage=1;non_full_length_coverage=0;isoform_length=3003;expected_accuracy=1.000                                                                  | gnl BL_ORD_ID 38195                      cb2947_c15/f1p0/5692<br>isoform=cb2947_c15;full_length_coverage=1;non_full_length_coverage=0;isoform_length=5692;expected_accuracy=0.995                                                                | 15   | 2762 | 2763 | 3003 | 1    | 275<br>5 | 2918 | 315<br>8 |
| cb8564_c44698/f1p5/2843<br>isoform=cb8564_c44698;full_length_coverage=1;non_full_length_coverage=5;isoform_length=2843;expected_accuracy=0.997                                                          | gnl BL_ORD_ID 9418                      cb8564_c119193/f1p2/2975<br>isoform=cb8564_c119193;full_length_coverage=1;non_full_length_coverage=2;isoform_length=2975;expected_accuracy=0.998                                                         | 1    | 2516 | 2511 | 2826 | 1    | 253<br>2 | 2655 | 297<br>5 |
| cb4263_c4/f1p1/2943<br><br>cb2918_c67/f1p0/2483<br>isoform=cb2918_c67;full_length_coverage=1;non_full_length_coverage=0;isoform_length=2483;expected_accuracy=1.000                                     | gnl BL_ORD_ID 43863                      cb4263_c0/f1p1/3386<br>isoform=cb4263_c0;full_length_coverage=1;non_full_length_coverage=1;isoform_length=3386;expected_accuracy=0.992<br><br>gnl BL_ORD_ID 70088   cb2918_c33/f1p3/2817                | 241  | 2990 | 1    | 243  | 623  | 338<br>6 | 108  | 350      |
|                                                                                                                                                                                                         |                                                                                                                                                                                                                                                  | 1080 | 2483 | 1    | 1085 | 1299 | 270<br>2 | 58   | 1142     |

|                                                                                                                                                |                                                                                                                                            |                         |      |      |      |      |      |     |      |      |
|------------------------------------------------------------------------------------------------------------------------------------------------|--------------------------------------------------------------------------------------------------------------------------------------------|-------------------------|------|------|------|------|------|-----|------|------|
| cb4576_c12/f1p3/4007<br>isoform=cb4576_c12;full_length_coverage=13;non_full_length_coverage=3;isoform_length=4007;expected_accuracy=0.998      | gnl BL_ORD_ID 44415<br>isoform=cb4576_c54;full_length_coverage=1;non_full_length_coverage=0;isoform_length=4341;expected_accuracy=0.995    | cb4576_c54/f1p0/4341    | 1847 | 3894 | 1    | 1848 | 2301 | 434 | 1    | 183  |
| cb964_c15/f1p0/4325                                                                                                                            | gnl BL_ORD_ID 20582<br>isoform=cb964_c26;full_length_coverage=1;non_full_length_coverage=0;isoform_length=6950;expected_accuracy=0.996     | cb964_c26/f1p0/6950     | 121  | 2343 | 2342 | 4104 | 1    | 222 | 5212 | 6950 |
| cb17354_c1/f1p0/1440                                                                                                                           | gnl BL_ORD_ID 41507<br>isoform=cb34_c0;full_length_coverage=1;non_full_length_coverage=0;isoform_length=4992;expected_accuracy=0.999       | cb34_c0/f1p0/4992       | 1    | 1059 | 1056 | 1354 | 17   | 107 | 1799 | 2097 |
| cb6491_c6/f1p1/3274<br>isoform=cb6491_c6;full_length_coverage=1;non_full_length_coverage=1;isoform_length=3274;expected_accuracy=0.999         | gnl BL_ORD_ID 3949<br>isoform=cb6491_c2;full_length_coverage=1;non_full_length_coverage=0;isoform_length=4290;expected_accuracy=0.996      | cb6491_c2/f1p0/4290     | 15   | 2950 | 2948 | 3274 | 1    | 293 | 3099 | 3413 |
| cb8564_c38035/f1p0/2770                                                                                                                        | gnl BL_ORD_ID 55327                                                                                                                        | cb8564_c38462/f1p0/3241 | 1    | 2035 | 2033 | 2756 | 1    | 202 | 2218 | 2945 |
| cb2747_c7/f1p3/3310                                                                                                                            | gnl BL_ORD_ID 68804                                                                                                                        | cb2747_c6/f1p0/3765     | 1565 | 3243 | 1    | 1566 | 2019 | 369 | 1    | 1566 |
| cb8564_c49562/f1p0/2838<br>isoform=cb8564_c49562;full_length_coverage=1;non_full_length_coverage=0;isoform_length=2838;expected_accuracy=0.995 | gnl BL_ORD_ID 14539<br>isoform=cb8564_c46562;full_length_coverage=2;non_full_length_coverage=3;isoform_length=3196;expected_accuracy=0.995 | cb8564_c46562/f2p3/3196 | 1    | 2331 | 2327 | 2836 | 3    | 235 | 2683 | 3195 |
| cb5659_c32/f1p0/2068<br>isoform=cb5659_c32;full_length_coverage=1;non_full_length_coverage=0;isoform_length=2068;expected_accuracy=0.995       | gnl BL_ORD_ID 45353<br>isoform=cb5659_c43;full_length_coverage=1;non_full_length_coverage=0;isoform_length=2132;expected_accuracy=0.995    | cb5659_c43/f1p0/2132    | 914  | 2068 | 94   | 919  | 930  | 208 | 1    | 829  |

|                                                               |                                                                                                                                                                                     |     |      |      |      |      |      |      |     |   |
|---------------------------------------------------------------|-------------------------------------------------------------------------------------------------------------------------------------------------------------------------------------|-----|------|------|------|------|------|------|-----|---|
| length_coverage=0;isoform_length=2068;expected_accuracy=0.993 | ength_coverage=0;isoform_length=2132;expected_accuracy=0.992                                                                                                                        |     |      |      |      |      |      |      |     |   |
| cb12092_c9/f1p0/1052                                          | gnl BL_ORD_ID 24711                      cb12092_c11/f1p0/1145<br>isoform=cb12092_c11;full_length_coverage=1;non_full_length_coverage=0;isoform_length=1145;expected_accuracy=0.998 | 426 | 983  | 1    | 429  | 547  | 1107 | 1    | 431 |   |
| cb8564_c25634/f1p0/2542                                       | gnl BL_ORD_ID 60434   cb11946_c5/f1p1/5186                                                                                                                                          | 956 | 2536 | 99   | 957  | 3619 | 520  | 2229 | 308 | 7 |
| cb17699_c4/f1p0/1082                                          | gnl BL_ORD_ID 32243                      cb17699_c0/f6p1/1251<br>isoform=cb17699_c0;full_length_coverage=6;non_full_length_coverage=1;isoform_length=1251;expected_accuracy=1.000   | 171 | 1057 | 4    | 175  | 365  | 125  | 1    | 172 |   |
| cb8028_c0/f2p0/1473                                           | gnl BL_ORD_ID 6436                      cb8028_c2/f1p0/2399<br>isoform=cb8028_c0;full_length_coverage=2;non_full_length_coverage=0;isoform_length=1473;expected_accuracy=1.000      | 384 | 1473 | 7    | 385  | 1303 | 239  | 3    | 390 | 8 |
| cb5724_c9/f1p0/2169                                           | gnl BL_ORD_ID 46771                      cb5724_c8/f1p0/2804<br>isoform=cb5724_c9;full_length_coverage=1;non_full_length_coverage=0;isoform_length=2169;expected_accuracy=0.999     | 1   | 1455 | 1453 | 2169 | 65   | 151  | 2086 | 280 | 1 |
| cb8564_c24424/f1p0/4115                                       | gnl BL_ORD_ID 52054   cb8564_c11371/f1p2/3552                                                                                                                                       | 12  | 3217 | 3216 | 3380 | 51   | 325  | 3132 | 329 | 6 |
| cb8564_c185920/f1p0/2777                                      | gnl BL_ORD_ID 56641   cb8564_c50309/f1p5/3075<br>isoform=cb8564_c185920;full_length_coverage=1;non_full_length_coverage=0;isoform_length=2777;expected_accuracy=0.996               | 174 | 2770 | 1    | 177  | 350  | 294  | 14   | 191 | 7 |

|                                                                                                                                                    |                                                                                                                                                                         |      |      |      |      |      |      |      |      |
|----------------------------------------------------------------------------------------------------------------------------------------------------|-------------------------------------------------------------------------------------------------------------------------------------------------------------------------|------|------|------|------|------|------|------|------|
| cb8564_c148448/f2p13/3821<br>isoform=cb8564_c148448;full_length_coverage=2;non_full_length_coverage=13;isoform_length=3821;expected_accuracy=0.995 | gnl BL_ORD_ID 16248      cb8564_c5118/f1p1/4889<br>isoform=cb8564_c5118;full_length_coverage=1;non_full_length_coverage=1;isoform_length=4889;expected_accuracy=0.991   | 1935 | 3812 | 108  | 1937 | 2987 | 4855 | 1    | 1822 |
| cb8516_c2/f1p0/2182                                                                                                                                | gnl BL_ORD_ID 52576      cb8516_c3/f1p0/2479                                                                                                                            | 1    | 1854 | 1854 | 2139 | 1    | 1854 | 1984 | 2269 |
| cb8564_c77994/f1p2/2630<br>isoform=cb8564_c77994;full_length_coverage=1;non_full_length_coverage=2;isoform_length=2630;expected_accuracy=0.998     | gnl BL_ORD_ID 57795      cb8564_c80951/f1p0/2999                                                                                                                        | 1    | 1819 | 1815 | 2630 | 131  | 1950 | 2094 | 2910 |
| cb8564_c40598/f1p4/3119                                                                                                                            | gnl BL_ORD_ID 17429      cb8564_c85447/f1p0/3196<br>isoform=cb8564_c85447;full_length_coverage=1;non_full_length_coverage=0;isoform_length=3196;expected_accuracy=0.997 | 1    | 2732 | 2729 | 3054 | 3    | 2752 | 2872 | 3196 |
| cb8564_c132795/f5p10/3729<br>isoform=cb8564_c132795;full_length_coverage=5;non_full_length_coverage=10;isoform_length=3729;expected_accuracy=0.999 | gnl BL_ORD_ID 15705      cb8564_c5095/f1p0/3793<br>isoform=cb8564_c5095;full_length_coverage=1;non_full_length_coverage=0;isoform_length=3793;expected_accuracy=0.995   | 1521 | 3640 | 1    | 1522 | 1673 | 3792 | 2    | 1523 |
| cb8564_c120215/f1p1/2248                                                                                                                           | gnl BL_ORD_ID 13672      cb8564_c1926/f1p1/2305<br>isoform=cb8564_c1926;full_length_coverage=1;non_full_length_coverage=1;isoform_length=2305;expected_accuracy=0.995   | 1002 | 2133 | 1    | 1004 | 1182 | 2305 | 1    | 998  |
| cb8564_c184250/f1p0/2256<br>isoform=cb8564_c184250;full_length_coverage=1;non_full_length_coverage=0;isoform_length=2256;expected_accuracy=0.996   | gnl BL_ORD_ID 14601      cb8564_c34940/f1p2/2892<br>isoform=cb8564_c34940;full_length_coverage=1;non_full_length_coverage=2;isoform_length=2892;expected_accuracy=0.991 | 1    | 1642 | 1638 | 2256 | 27   | 1670 | 1933 | 2553 |

|                                                                                                                                                  |                                                                                                                                                                         |     |      |      |      |      |      |      |      |
|--------------------------------------------------------------------------------------------------------------------------------------------------|-------------------------------------------------------------------------------------------------------------------------------------------------------------------------|-----|------|------|------|------|------|------|------|
| cb8564_c75620/f1p0/2781<br>isoform=cb8564_c75620;full_length_coverage=1;non_full_length_coverage=0;isoform_length=2781;expected_accuracy=0.996   | gnl BL_ORD_ID 18398      cb8564_c90428/f1p0/2987<br>isoform=cb8564_c90428;full_length_coverage=1;non_full_length_coverage=0;isoform_length=2987;expected_accuracy=0.996 | 1   | 1769 | 1764 | 2781 | 1    | 1734 | 1930 | 2947 |
| cb8564_c185920/f1p0/2777<br>isoform=cb8564_c185920;full_length_coverage=1;non_full_length_coverage=0;isoform_length=2777;expected_accuracy=0.996 | gnl BL_ORD_ID 55433      cb8564_c41572/f1p1/3265                                                                                                                        | 174 | 2777 | 1    | 177  | 344  | 2949 | 16   | 185  |
| cb868_c17/f1p0/3361                                                                                                                              | gnl BL_ORD_ID 56508      cb868_c12/f1p0/3718                                                                                                                            | 1   | 1833 | 1833 | 3334 | 24   | 1856 | 1966 | 3467 |
| cb1176_c32/f1p0/3993                                                                                                                             | gnl BL_ORD_ID 59226      cb1176_c14/f1p0/4251                                                                                                                           | 110 | 3923 | 1    | 112  | 419  | 4230 | 20   | 131  |
| cb8564_c46484/f1p0/3151                                                                                                                          | gnl BL_ORD_ID 16149      cb8564_c47162/f1p0/3361<br>isoform=cb8564_c47162;full_length_coverage=1;non_full_length_coverage=0;isoform_length=3361;expected_accuracy=0.996 | 325 | 3095 | 5    | 326  | 592  | 3361 | 103  | 402  |
| cb8564_c68409/f2p0/2141<br>isoform=cb8564_c68409;full_length_coverage=2;non_full_length_coverage=0;isoform_length=2141;expected_accuracy=0.995   | gnl BL_ORD_ID 15528      cb8564_c72800/f1p0/2322<br>isoform=cb8564_c72800;full_length_coverage=1;non_full_length_coverage=0;isoform_length=2322;expected_accuracy=0.996 | 265 | 2141 | 52   | 266  | 424  | 2300 | 1    | 213  |
| cb3722_c8/f1p0/3086                                                                                                                              | gnl BL_ORD_ID 71469      cb3722_c13/f1p0/3071                                                                                                                           | 114 | 2336 | 2335 | 3011 | 1    | 2223 | 2334 | 3010 |
| cb7735_c2/f2p0/1143<br>isoform=cb7735_c2;full_length_coverage=2;non_full_length_coverage=0;isoform_length=1143;expected_accuracy=1.000           | gnl BL_ORD_ID 8560      cb7735_c5/f1p0/2560<br>isoform=cb7735_c5;full_length_coverage=1;non_full_length_coverage=0;isoform_length=2560;expected_accuracy=0.997          | 434 | 1141 | 8    | 435  | 1854 | 2560 | 1    | 428  |



|                                                                                                                                                |                     |                                                                                                                                                |     |      |      |      |      |          |      |          |
|------------------------------------------------------------------------------------------------------------------------------------------------|---------------------|------------------------------------------------------------------------------------------------------------------------------------------------|-----|------|------|------|------|----------|------|----------|
| cb8564_c69139/f2p0/3547                                                                                                                        | gnl BL_ORD_ID 56103 | cb8564_c69762/f2p0/4058                                                                                                                        | 1   | 2065 | 2066 | 3562 | 55   | 2119     | 2230 | 372<br>6 |
| cb7463_c5/f1p0/2362<br>isoform=cb7463_c5;full_length_coverage=1;non_full_length_coverage=0;isoform_length=2362;expected_accuracy=0.995         | gnl BL_ORD_ID 8127  | cb7463_c11/f4p1/2609<br>isoform=cb7463_c11;full_length_coverage=4;non_full_length_coverage=1;isoform_length=2609;expected_accuracy=0.999       | 177 | 2362 | 1    | 180  | 422  | 260<br>8 | 72   | 251      |
| cb8345_c2/f1p0/2284<br>isoform=cb8345_c2;full_length_coverage=1;non_full_length_coverage=0;isoform_length=2284;expected_accuracy=0.994         | gnl BL_ORD_ID 9936  | cb8345_c0/f1p0/2394<br>isoform=cb8345_c0;full_length_coverage=1;non_full_length_coverage=0;isoform_length=2394;expected_accuracy=0.993         | 1   | 1512 | 1512 | 2284 | 1    | 149<br>0 | 1613 | 238<br>7 |
| cb8564_c39136/f1p0/3036<br>isoform=cb8564_c39136;full_length_coverage=1;non_full_length_coverage=0;isoform_length=3036;expected_accuracy=0.998 | gnl BL_ORD_ID 16622 | cb8564_c50151/f1p0/3198<br>isoform=cb8564_c50151;full_length_coverage=1;non_full_length_coverage=0;isoform_length=3198;expected_accuracy=0.995 | 1   | 2089 | 2085 | 3034 | 6    | 212<br>0 | 2247 | 319<br>8 |
| cb6405_c6/f1p0/2746<br>isoform=cb6405_c6;full_length_coverage=1;non_full_length_coverage=0;isoform_length=2746;expected_accuracy=0.997         | gnl BL_ORD_ID 49679 | cb6405_c4/f1p0/2864                                                                                                                            | 1   | 1642 | 1641 | 2746 | 1    | 164<br>2 | 1787 | 289<br>2 |
| cb7181_c10/f1p1/1554<br>isoform=cb7181_c10;full_length_coverage=1;non_full_length_coverage=1;isoform_length=1554;expected_accuracy=0.994       | gnl BL_ORD_ID 3704  | cb7181_c1/f3p1/2633<br>isoform=cb7181_c1;full_length_coverage=3;non_full_length_coverage=1;isoform_length=2633;expected_accuracy=0.999         | 1   | 1058 | 1056 | 1519 | 4    | 106<br>0 | 2118 | 258<br>3 |
| cb8564_c112431/f1p0/2101                                                                                                                       | gnl BL_ORD_ID 14374 | cb8564_c37670/f2p0/3061<br>isoform=cb8564_c37670;full_length_coverage=2;non_full_length_coverage=0;isoform_length=3061;expected_accuracy=1.000 | 164 | 1864 | 1    | 165  | 1361 | 306<br>1 | 50   | 214      |

|                                                                                                                                                |                                                                                                                                                                    |     |      |      |      |     |      |      |      |
|------------------------------------------------------------------------------------------------------------------------------------------------|--------------------------------------------------------------------------------------------------------------------------------------------------------------------|-----|------|------|------|-----|------|------|------|
| cb18456_c6530/f1p0/1200                                                                                                                        | gnl BL_ORD_ID 60328 cb11694_c2/f1p0/2576                                                                                                                           | 260 | 1166 | 3    | 259  | 947 | 41   | 1734 | 1478 |
| cb4016_c18/f1p0/2605<br>isoform=cb4016_c18;full_length_coverage=1;non_full_length_coverage=0;isoform_length=2605;expected_accuracy=0.999       | gnl BL_ORD_ID 40529 cb4016_c2/f3p1/2863<br>isoform=cb4016_c2;full_length_coverage=3;non_full_length_coverage=1;isoform_length=2863;expected_accuracy=0.998         | 188 | 2564 | 1    | 189  | 491 | 2863 | 2    | 189  |
| cb8564_c74180/f1p1/2858                                                                                                                        | gnl BL_ORD_ID 17040 cb8564_c69197/f5p5/3337<br>isoform=cb8564_c69197;full_length_coverage=5;non_full_length_coverage=5;isoform_length=3337;expected_accuracy=0.996 | 1   | 2587 | 2585 | 2854 | 109 | 2695 | 2834 | 3103 |
| cb2723_c26/f4p0/2737<br>isoform=cb2723_c26;full_length_coverage=4;non_full_length_coverage=0;isoform_length=2737;expected_accuracy=1.000       | gnl BL_ORD_ID 36753 cb2723_c4/f2p0/4552<br>isoform=cb2723_c4;full_length_coverage=2;non_full_length_coverage=0;isoform_length=4552;expected_accuracy=1.000         | 15  | 2395 | 2395 | 2737 | 1   | 2388 | 3276 | 3618 |
| cb8564_c41692/f1p3/2987<br>isoform=cb8564_c41692;full_length_coverage=1;non_full_length_coverage=3;isoform_length=2987;expected_accuracy=0.995 | gnl BL_ORD_ID 55920 cb8564_c48949/f1p0/4357                                                                                                                        | 1   | 2317 | 2318 | 2987 | 2   | 2293 | 2847 | 3504 |
| cb8564_c2241/f1p2/2527<br>isoform=cb8564_c2241;full_length_coverage=1;non_full_length_coverage=2;isoform_length=2527;expected_accuracy=0.995   | gnl BL_ORD_ID 13611 cb8564_c2184/f1p0/2606<br>isoform=cb8564_c2184;full_length_coverage=1;non_full_length_coverage=0;isoform_length=2606;expected_accuracy=0.995   | 294 | 2527 | 32   | 294  | 384 | 2605 | 24   | 272  |
| cb13748_c51/f1p0/3514                                                                                                                          | gnl BL_ORD_ID 26168 cb13748_c41/f1p2/3610<br>isoform=cb13748_c41;full_length_coverage=1;non_full_length_coverage=2;isoform_length=3610;expected_accuracy=0.999     | 2   | 2809 | 2807 | 2951 | 5   | 2815 | 3048 | 3190 |

|                                                                                                                                                  |                                                                                                                                            |                         |     |      |      |      |     |      |      |      |
|--------------------------------------------------------------------------------------------------------------------------------------------------|--------------------------------------------------------------------------------------------------------------------------------------------|-------------------------|-----|------|------|------|-----|------|------|------|
| cb8564_c185920/f1p0/2777<br>isoform=cb8564_c185920;full_length_coverage=1;non_full_length_coverage=0;isoform_length=2777;expected_accuracy=0.996 | gnl BL_ORD_ID 15428<br>isoform=cb8564_c42387;full_length_coverage=1;non_full_length_coverage=4;isoform_length=2973;expected_accuracy=0.993 | cb8564_c42387/f1p4/2973 | 174 | 2766 | 1    | 177  | 354 | 2973 | 15   | 195  |
| cb8478_c7/f2p0/3290<br>isoform=cb8478_c7;full_length_coverage=2;non_full_length_coverage=0;isoform_length=3290;expected_accuracy=0.998           | gnl BL_ORD_ID 10224<br>isoform=cb8478_c13;full_length_coverage=2;non_full_length_coverage=0;isoform_length=3348;expected_accuracy=1.000    | cb8478_c13/f2p0/3348    | 1   | 3034 | 3034 | 3225 | 1   | 3031 | 3157 | 3348 |
| cb5516_c26/f1p0/3029<br>isoform=cb5516_c26;full_length_coverage=1;non_full_length_coverage=0;isoform_length=3029;expected_accuracy=1.000         | gnl BL_ORD_ID 46314<br>isoform=cb5516_c2;full_length_coverage=40;non_full_length_coverage=1;isoform_length=3248;expected_accuracy=1.000    | cb5516_c2/f40p1/3248    | 10  | 2327 | 2322 | 3027 | 101 | 2417 | 2542 | 3248 |
| cb4461_c3/f1p2/2896                                                                                                                              | gnl BL_ORD_ID 44357<br>isoform=cb4461_c2;full_length_coverage=1;non_full_length_coverage=2;isoform_length=3341;expected_accuracy=0.996     | cb4461_c2/f1p2/3341     | 23  | 2475 | 2474 | 2896 | 1   | 2453 | 2920 | 3340 |
| cb8564_c181853/f1p0/2119<br>isoform=cb8564_c181853;full_length_coverage=1;non_full_length_coverage=0;isoform_length=2119;expected_accuracy=0.997 | gnl BL_ORD_ID 15994<br>isoform=cb8564_c54019;full_length_coverage=1;non_full_length_coverage=1;isoform_length=2940;expected_accuracy=0.991 | cb8564_c54019/f1p1/2940 | 1   | 1339 | 1334 | 2119 | 7   | 1333 | 2158 | 2935 |
| cb8564_c41162/f1p0/3158                                                                                                                          | gnl BL_ORD_ID 55910<br>isoform=cb8564_c48645;full_length_coverage=1;non_full_length_coverage=0;isoform_length=2151;expected_accuracy=0.997 | cb8564_c48645/f1p1/3287 | 21  | 2553 | 2548 | 2975 | 22  | 2555 | 2686 | 3113 |
| cb8564_c4961/f1p0/2082                                                                                                                           | gnl BL_ORD_ID 16588<br>isoform=cb8564_c4944;full_length_coverage=1;non_full_length_coverage=0;isoform_length=2151;expected_accuracy=0.997  | cb8564_c4944/f1p0/2151  | 212 | 2077 | 56   | 212  | 286 | 2151 | 8    | 162  |

|                                                                                                                                                  |                                                                                                                                                                        |     |      |      |      |     |      |      |      |
|--------------------------------------------------------------------------------------------------------------------------------------------------|------------------------------------------------------------------------------------------------------------------------------------------------------------------------|-----|------|------|------|-----|------|------|------|
| cb8564_c185945/f1p0/2304<br>isoform=cb8564_c185945;full_length_coverage=1;non_full_length_coverage=0;isoform_length=2304;expected_accuracy=0.997 | gnl BL_ORD_ID 56102 cb8564_c69761/f1p0/2560                                                                                                                            | 1   | 1938 | 1933 | 2302 | 1   | 1935 | 2160 | 2527 |
| cb8564_c88915/f1p0/2486<br>isoform=cb8564_c88915;full_length_coverage=1;non_full_length_coverage=0;isoform_length=2486;expected_accuracy=0.999   | gnl BL_ORD_ID 17082 cb8564_c85207/f1p0/2727<br>isoform=cb8564_c85207;full_length_coverage=1;non_full_length_coverage=0;isoform_length=2727;expected_accuracy=0.997     | 1   | 1537 | 1535 | 2486 | 1   | 1535 | 1775 | 2726 |
| cb9602_c3/f1p0/1779<br>isoform=cb9602_c3;full_length_coverage=1;non_full_length_coverage=0;isoform_length=1779;expected_accuracy=0.993           | gnl BL_ORD_ID 20056 cb9602_c1/f1p0/2113<br>isoform=cb9602_c1;full_length_coverage=1;non_full_length_coverage=0;isoform_length=2113;expected_accuracy=0.994             | 421 | 1779 | 72   | 422  | 756 | 2113 | 1    | 351  |
| cb8564_c146882/f3p8/4113<br>isoform=cb8564_c146882;full_length_coverage=3;non_full_length_coverage=8;isoform_length=4113;expected_accuracy=0.998 | gnl BL_ORD_ID 13890 cb8564_c35935/f1p0/4149<br>isoform=cb8564_c35935;full_length_coverage=1;non_full_length_coverage=0;isoform_length=4149;expected_accuracy=0.993     | 181 | 4062 | 1    | 185  | 288 | 4149 | 1    | 183  |
| cb5103_c4/f2p0/1847<br>isoform=cb5103_c4;full_length_coverage=2;non_full_length_coverage=0;isoform_length=1847;expected_accuracy=0.994           | gnl BL_ORD_ID 73268 cb5103_c10/f1p0/2138                                                                                                                               | 1   | 1521 | 1518 | 1773 | 4   | 1530 | 1846 | 2102 |
| cb964_c15/f1p0/4325                                                                                                                              | gnl BL_ORD_ID 59137 cb964_c2/f1p0/4848                                                                                                                                 | 14  | 2341 | 2342 | 4110 | 185 | 2513 | 2718 | 4486 |
| cb8564_c15653/f1p4/2475                                                                                                                          | gnl BL_ORD_ID 12776 cb8564_c163741/f1p20/2690<br>isoform=cb8564_c163741;full_length_coverage=1;non_full_length_coverage=20;isoform_length=2690;expected_accuracy=1.000 | 16  | 2293 | 2289 | 2433 | 48  | 2327 | 2546 | 2690 |

|                                                                                                                                                |                                                                                                                                                                    |     |      |      |      |      |      |      |      |
|------------------------------------------------------------------------------------------------------------------------------------------------|--------------------------------------------------------------------------------------------------------------------------------------------------------------------|-----|------|------|------|------|------|------|------|
| cb12931_c15/f1p0/1493<br>isoform=cb12931_c15;full_length_coverage=1;non_full_length_coverage=0;isoform_length=1493;expected_accuracy=1.000     | gnl BL_ORD_ID 55818 cb8564_c41208/f1p0/2901                                                                                                                        | 1   | 1106 | 1104 | 1484 | 1    | 1105 | 2438 | 2817 |
| cb8564_c40598/f1p4/3119                                                                                                                        | gnl BL_ORD_ID 55211 cb8564_c35547/f1p0/3745                                                                                                                        | 1   | 2732 | 2729 | 3055 | 9    | 2739 | 2860 | 3186 |
| cb8564_c43455/f1p0/2242<br>isoform=cb8564_c43455;full_length_coverage=1;non_full_length_coverage=0;isoform_length=2242;expected_accuracy=0.995 | gnl BL_ORD_ID 16671 cb8564_c54439/f1p0/2590<br>isoform=cb8564_c54439;full_length_coverage=1;non_full_length_coverage=0;isoform_length=2590;expected_accuracy=0.994 | 279 | 2242 | 4    | 283  | 567  | 2578 | 5    | 290  |
| cb8564_c47011/f1p0/3100                                                                                                                        | gnl BL_ORD_ID 55246 cb8564_c36343/f1p0/3448                                                                                                                        | 17  | 2306 | 2301 | 2934 | 19   | 2314 | 2550 | 3183 |
| cb13417_c4/f1p0/1422<br>isoform=cb13417_c4;full_length_coverage=1;non_full_length_coverage=0;isoform_length=1422;expected_accuracy=1.000       | gnl BL_ORD_ID 25115 cb13417_c0/f2p0/1787<br>isoform=cb13417_c0;full_length_coverage=2;non_full_length_coverage=0;isoform_length=1787;expected_accuracy=0.990       | 1   | 1170 | 1170 | 1421 | 85   | 1260 | 1536 | 1787 |
| cb8564_c10938/f1p1/2321                                                                                                                        | gnl BL_ORD_ID 17270 cb8564_c9070/f5p11/3834<br>isoform=cb8564_c9070;full_length_coverage=5;non_full_length_coverage=11;isoform_length=3834;expected_accuracy=1.000 | 1   | 1315 | 1310 | 2292 | 1313 | 2627 | 2746 | 3728 |
| cb8564_c46212/f3p1/4373<br>isoform=cb8564_c46212;full_length_coverage=3;non_full_length_coverage=1;isoform_length=4373;expected_accuracy=0.999 | gnl BL_ORD_ID 14314 cb8564_c45827/f2p2/4435<br>isoform=cb8564_c45827;full_length_coverage=2;non_full_length_coverage=2;isoform_length=4435;expected_accuracy=0.999 | 184 | 4334 | 15   | 185  | 279  | 4434 | 1    | 163  |
| cb4016_c34/f1p0/2560<br>isoform=cb4016_c34;full_length_coverage=1;non_full_length_coverage=0;isoform_length=2560;expected_accuracy=1.000       | gnl BL_ORD_ID 39535 cb4016_c27/f1p1/3204<br>isoform=cb4016_c27;full_length_coverage=1;non_full_length_coverage=0;isoform_length=3204;expected_accuracy=1.000       | 194 | 2560 | 15   | 195  | 790  | 3150 | 3    | 181  |

|                                                                                                                                                                                                         |                                                                                                                                                                                                                                                    |      |      |      |      |      |     |      |     |
|---------------------------------------------------------------------------------------------------------------------------------------------------------------------------------------------------------|----------------------------------------------------------------------------------------------------------------------------------------------------------------------------------------------------------------------------------------------------|------|------|------|------|------|-----|------|-----|
| length_coverage=0;isoform_length=2560;expected_accuracy=0.998<br>cb9780_c1/f2p0/1733<br>isoform=cb9780_c1;full_length_coverage=2;non_full_length_coverage=0;isoform_length=1733;expected_accuracy=0.995 | length_coverage=1;isoform_length=3204;expected_accuracy=0.996<br>gnl BL_ORD_ID 21082                      cb9780_c12/f1p0/1845<br>isoform=cb9780_c12;full_length_coverage=1;non_full_length_coverage=0;isoform_length=1845;expected_accuracy=0.995 | 117  | 1727 | 1    | 120  | 259  | 184 | 1    | 121 |
| cb3627_c2/f1p0/1989<br>isoform=cb3627_c2;full_length_coverage=1;non_full_length_coverage=0;isoform_length=1989;expected_accuracy=0.993                                                                  | gnl BL_ORD_ID 41467                      cb3627_c1/f1p0/3569<br>isoform=cb3627_c1;full_length_coverage=1;non_full_length_coverage=0;isoform_length=3569;expected_accuracy=0.991                                                                    | 1    | 1516 | 1517 | 1989 | 4    | 151 | 2440 | 291 |
| cb12_c37/f1p0/4067<br>cb3537_c0/f9p0/3405<br>isoform=cb3537_c0;full_length_coverage=9;non_full_length_coverage=0;isoform_length=3405;expected_accuracy=1.000                                            | gnl BL_ORD_ID 61090   cb12_c56/f1p0/6478<br>gnl BL_ORD_ID 71292   cb3537_c10/f1p0/3473                                                                                                                                                             | 286  | 4058 | 1    | 288  | 2515 | 629 | 2098 | 238 |
| cb5372_c2/f1p0/2179<br>isoform=cb5372_c2;full_length_coverage=1;non_full_length_coverage=0;isoform_length=2179;expected_accuracy=0.993                                                                  | gnl BL_ORD_ID 73836   cb5372_c0/f1p0/3087                                                                                                                                                                                                          | 1    | 1577 | 1576 | 2177 | 131  | 170 | 2288 | 288 |
| cb1573_c16/f1p0/3454<br>isoform=cb1573_c16;full_length_coverage=1;non_full_length_coverage=0;isoform_length=3454;expected_accuracy=0.998                                                                | gnl BL_ORD_ID 30371                      cb1573_c7/f1p2/3841<br>isoform=cb1573_c7;full_length_coverage=1;non_full_length_coverage=2;isoform_length=3841;expected_accuracy=1.000                                                                    | 1249 | 3454 | 1    | 1252 | 1445 | 365 | 33   | 128 |
| cb8564_c4966/f1p0/2245                                                                                                                                                                                  | gnl BL_ORD_ID 16588                      cb8564_c4944/f1p0/2151<br>isoform=cb8564_c4944;full_length_coverage=1;non_full_length_coverage=0;isoform_length=2151;expected_accuracy=0.998                                                              | 128  | 1993 | 1    | 128  | 286  | 215 | 36   | 162 |

|                                                                                                                     |                                                                                                                                |     |      |      |      |     |      |      |     |
|---------------------------------------------------------------------------------------------------------------------|--------------------------------------------------------------------------------------------------------------------------------|-----|------|------|------|-----|------|------|-----|
| cb6221_c13/f1p0/2080                                                                                                | l_length_coverage=0;isoform_length=2151;expected_accuracy=0.997<br>gnl BL_ORD_ID 4880                      cb6221_c4/f3p3/2906 | 117 | 2080 | 1    | 117  | 900 | 286  | 73   | 187 |
| isoform=cb6221_c13;full_length_coverage=1;non_full_length_coverage=0;isoform_length=2080;expected_accuracy=1.000    | isoform=cb6221_c4;full_length_coverage=3;non_full_length_coverage=3;isoform_length=2906;expected_accuracy=1.000                |     |      |      |      |     | 5    |      |     |
| cb8564_c43455/f1p0/2242                                                                                             | gnl BL_ORD_ID 11774                      cb8564_c146891/f2p5/2561                                                              | 279 | 2242 | 29   | 283  | 571 | 254  | 48   | 302 |
| isoform=cb8564_c43455;full_length_coverage=1;non_full_length_coverage=0;isoform_length=2242;expected_accuracy=0.995 | isoform=cb8564_c146891;full_length_coverage=2;non_full_length_coverage=5;isoform_length=2561;expected_accuracy=0.999           |     |      |      |      |     | 3    |      |     |
| cb8564_c71742/f1p0/2675                                                                                             | gnl BL_ORD_ID 54752                      cb8564_c167108/f1p0/2919                                                              | 1   | 1309 | 1310 | 2413 | 122 | 142  | 1809 | 291 |
| isoform=cb8564_c71742;full_length_coverage=1;non_full_length_coverage=0;isoform_length=2675;expected_accuracy=1.000 | isoform=cb8564_c167108;full_length_coverage=1;non_full_length_coverage=0;isoform_length=2919;expected_accuracy=0.999           |     |      |      |      |     | 2    |      | 2   |
| cb2044_c6/f1p0/1724                                                                                                 | gnl BL_ORD_ID 34506                      cb2044_c4/f1p0/1805                                                                   | 140 | 1674 | 1    | 141  | 285 | 180  | 28   | 168 |
| isoform=cb2044_c6;full_length_coverage=1;non_full_length_coverage=0;isoform_length=1724;expected_accuracy=1.000     | isoform=cb2044_c4;full_length_coverage=1;non_full_length_coverage=0;isoform_length=1805;expected_accuracy=0.999                |     |      |      |      |     | 5    |      |     |
| cb8564_c43119/f1p4/3194                                                                                             | gnl BL_ORD_ID 56069                      cb8564_c54106/f1p2/3479                                                               | 1   | 1671 | 1668 | 3157 | 1   | 166  | 1802 | 327 |
| isoform=cb8564_c43119;full_length_coverage=1;non_full_length_coverage=4;isoform_length=3194;expected_accuracy=0.995 | isoform=cb8564_c54106;full_length_coverage=1;non_full_length_coverage=4;isoform_length=3479;expected_accuracy=0.995            |     |      |      |      |     | 0    |      | 9   |
| cb10471_c5/f1p1/1667                                                                                                | gnl BL_ORD_ID 48559                      cb10471_c4/f1p1/2111                                                                  | 99  | 1631 | 1    | 101  | 569 | 2112 | 58   | 158 |
| isoform=cb10471_c5;full_length_coverage=1;non_full_length_coverage=1;isoform_length=1667;expected_accuracy=0.999    | isoform=cb10471_c4;full_length_coverage=1;non_full_length_coverage=1;isoform_length=2111;expected_accuracy=0.999               |     |      |      |      |     |      |      |     |
| cb6221_c19/f1p0/1943                                                                                                | gnl BL_ORD_ID 49542                      cb6221_c14/f1p0/2546                                                                  | 247 | 1873 | 66   | 247  | 756 | 238  | 3    | 185 |
| isoform=cb6221_c19;full_length_coverage=1;non_full_length_coverage=0;isoform_length=1943;expected_accuracy=0.995    | isoform=cb6221_c14;full_length_coverage=1;non_full_length_coverage=0;isoform_length=2546;expected_accuracy=0.995               |     |      |      |      |     | 5    |      |     |

|                                                                                                                                                  |                                             |     |      |      |      |     |      |      |      |
|--------------------------------------------------------------------------------------------------------------------------------------------------|---------------------------------------------|-----|------|------|------|-----|------|------|------|
| cb1913_c44/f1p0/2236<br>isoform=cb1913_c44;full_length_coverage=1;non_full_length_coverage=0;isoform_length=2236;expected_accuracy=0.998         | gnl BL_ORD_ID 66491 cb1913_c50/f1p1/2689    | 1   | 1634 | 1630 | 2236 | 98  | 1724 | 1849 | 2467 |
| cb6712_c3/f2p0/2326<br>isoform=cb6712_c3;full_length_coverage=2;non_full_length_coverage=0;isoform_length=2326;expected_accuracy=1.000           | gnl BL_ORD_ID 4045 cb6712_c5/f1p0/2789      | 1   | 1423 | 1422 | 2245 | 67  | 1488 | 1966 | 2789 |
| cb8564_c10819/f1p1/3887<br>isoform=cb8564_c10819;full_length_coverage=1;non_full_length_coverage=1;isoform_length=3887;expected_accuracy=0.995   | gnl BL_ORD_ID 14495 cb8564_c35464/f1p1/3983 | 1   | 3553 | 3549 | 3854 | 10  | 3560 | 3677 | 3983 |
| cb2279_c0/f10p3/2834<br>isoform=cb2279_c0;full_length_coverage=10;non_full_length_coverage=3;isoform_length=2834;expected_accuracy=1.000         | gnl BL_ORD_ID 68406 cb2279_c5/f1p1/2918     | 1   | 1930 | 1929 | 2813 | 1   | 1930 | 2076 | 2960 |
| cb5814_c5/f1p0/2403<br>isoform=cb5814_c5;full_length_coverage=1;non_full_length_coverage=0;isoform_length=2403;expected_accuracy=0.993           | gnl BL_ORD_ID 45442 cb5814_c10/f1p1/2706    | 1   | 1848 | 1845 | 2403 | 86  | 1935 | 2065 | 2622 |
| cb8564_c185920/f1p0/2777<br>isoform=cb8564_c185920;full_length_coverage=1;non_full_length_coverage=0;isoform_length=2777;expected_accuracy=0.996 | gnl BL_ORD_ID 55839 cb8564_c43677/f1p0/3269 | 174 | 2770 | 1    | 177  | 404 | 2999 | 69   | 245  |
| cb5068_c5/f1p1/2699<br>isoform=cb5068_c5;full_length_coverage=1;non_full_length_coverage=0;isoform_length=2699;expected_accuracy=0.996           | gnl BL_ORD_ID 73236 cb5068_c3/f1p1/2981     | 2   | 2431 | 2426 | 2699 | 147 | 2577 | 2723 | 2996 |



|                                                                                                                                                                                                         |                                                                                                                                                              |     |      |      |      |      |          |      |          |
|---------------------------------------------------------------------------------------------------------------------------------------------------------------------------------------------------------|--------------------------------------------------------------------------------------------------------------------------------------------------------------|-----|------|------|------|------|----------|------|----------|
| ngth_coverage=1;isoform_length=2699;expected_accuracy=0.995<br>cb2629_c15/f1p0/2175<br>isoform=cb2629_c15;full_length_coverage=1;non_full_length_coverage=0;isoform_length=2175;expected_accuracy=0.991 | gnl BL_ORD_ID 68645 cb2629_c13/f1p0/4067                                                                                                                     | 1   | 1663 | 1662 | 2175 | 1785 | 345<br>0 | 3561 | 407<br>4 |
| cb13753_c0/f1p0/1755                                                                                                                                                                                    | gnl BL_ORD_ID 41340 cb3759_c3/f1p0/1980<br>isoform=cb3759_c3;full_length_coverage=1;non_full_length_coverage=0;isoform_length=1980;expected_accuracy=0.996   | 377 | 1707 | 7    | 378  | 635  | 196<br>4 | 1    | 372      |
| cb7576_c14/f1p1/1754                                                                                                                                                                                    | gnl BL_ORD_ID 50604 cb7576_c6/f1p0/2034                                                                                                                      | 1   | 1614 | 1610 | 1758 | 1    | 160<br>8 | 1716 | 186<br>8 |
| cb3143_c31/f1p0/2171                                                                                                                                                                                    | gnl BL_ORD_ID 36686 cb3143_c30/f1p0/2377<br>isoform=cb3143_c30;full_length_coverage=1;non_full_length_coverage=0;isoform_length=2377;expected_accuracy=1.000 | 1   | 1600 | 1599 | 2164 | 1    | 160<br>5 | 1749 | 231<br>5 |
| cb6111_c34/f1p0/1434<br>isoform=cb6111_c34;full_length_coverage=1;non_full_length_coverage=0;isoform_length=1434;expected_accuracy=0.992                                                                | gnl BL_ORD_ID 74915 cb6111_c17/f1p0/1775                                                                                                                     | 121 | 1387 | 12   | 126  | 416  | 168<br>1 | 14   | 131      |
| cb4543_c0/f1p0/3310                                                                                                                                                                                     | gnl BL_ORD_ID 36954 cb2770_c15/f1p1/3337<br>isoform=cb2770_c15;full_length_coverage=1;non_full_length_coverage=1;isoform_length=3337;expected_accuracy=0.994 | 652 | 3117 | 73   | 651  | 2605 | 139      | 3294 | 271<br>5 |
| cb9718_c43/f1p0/1655<br>isoform=cb9718_c43;full_length_coverage=1;non_full                                                                                                                              | gnl BL_ORD_ID 20841 cb9718_c52/f66p3/1863<br>isoform=cb9718_c52;full_length_coverage=66;non_full                                                             | 288 | 1655 | 3    | 290  | 488  | 186<br>2 | 101  | 388      |

|                                                                                                                                                                                                                   |                                                                                                                                                                         |      |      |      |      |      |      |      |      |
|-------------------------------------------------------------------------------------------------------------------------------------------------------------------------------------------------------------------|-------------------------------------------------------------------------------------------------------------------------------------------------------------------------|------|------|------|------|------|------|------|------|
| length_coverage=0;isoform_length=1655;expected_accuracy=0.996<br>cb7849_c18/f1p0/2052<br>isoform=cb7849_c18;full_length_coverage=1;non_full_length_coverage=0;isoform_length=2052;expected_accuracy=0.991         | gnl BL_ORD_ID 51570 cb7849_c31/f1p0/2309                                                                                                                                | 12   | 1375 | 1373 | 2051 | 55   | 1418 | 1551 | 2234 |
| length_coverage=3;isoform_length=1863;expected_accuracy=1.000<br>cb8564_c107494/f8p3/3940<br>isoform=cb8564_c107494;full_length_coverage=8;non_full_length_coverage=3;isoform_length=3940;expected_accuracy=1.000 | gnl BL_ORD_ID 18179      cb8564_c87968/f1p1/3997<br>isoform=cb8564_c87968;full_length_coverage=1;non_full_length_coverage=1;isoform_length=3997;expected_accuracy=0.993 | 505  | 3914 | 97   | 508  | 580  | 3997 | 1    | 412  |
| cb8564_c90990/f1p3/3338                                                                                                                                                                                           | gnl BL_ORD_ID 14810      cb8564_c34492/f1p1/3811<br>isoform=cb8564_c34492;full_length_coverage=1;non_full_length_coverage=1;isoform_length=3811;expected_accuracy=0.991 | 236  | 3271 | 2    | 237  | 771  | 3811 | 1    | 239  |
| cb8564_c44290/f1p1/3198                                                                                                                                                                                           | gnl BL_ORD_ID 14531      cb8564_c41778/f1p9/3482<br>isoform=cb8564_c41778;full_length_coverage=1;non_full_length_coverage=9;isoform_length=3482;expected_accuracy=0.992 | 336  | 2964 | 7    | 338  | 815  | 3442 | 5    | 342  |
| cb4452_c6/f1p0/3034                                                                                                                                                                                               | gnl BL_ORD_ID 72572 cb4452_c3/f1p0/3340                                                                                                                                 | 1293 | 3023 | 1    | 1295 | 1566 | 3297 | 154  | 1448 |
| cb8564_c51647/f1p0/2214<br>isoform=cb8564_c51647;full_length_coverage=1;non_full_length_coverage=0;isoform_length=2214;expected_accuracy=0.993                                                                    | gnl BL_ORD_ID 55615 cb8564_c46860/f1p0/4047                                                                                                                             | 159  | 2214 | 1    | 158  | 1582 | 3637 | 1209 | 1366 |
| cb595_c15/f1p0/3791                                                                                                                                                                                               | gnl BL_ORD_ID 45025      cb595_c8/f1p2/4751<br>isoform=cb595_c8;full_length_coverage=1;non_full_length_coverage=0;isoform_length=4751;expected_accuracy=0.993           | 1    | 2284 | 2284 | 3916 | 9    | 2292 | 3065 | 4696 |

|                      |                                                                                                                                                                                                                                                 |     |      |      |      |      |          |      |          |
|----------------------|-------------------------------------------------------------------------------------------------------------------------------------------------------------------------------------------------------------------------------------------------|-----|------|------|------|------|----------|------|----------|
| cb9781_c0/f1p0/1976  | gth_coverage=2;isoform_length=4751;expected_accuracy=0.998<br>gnl BL_ORD_ID 20401                      cb9781_c1/f1p0/2121<br>isoform=cb9781_c1;full_length_coverage=1;non_full_length_coverage=0;isoform_length=2121;expected_accuracy=0.991   | 117 | 1976 | 1    | 116  | 220  | 207<br>6 | 4    | 119      |
| cb452_c69/f1p2/3866  | gth_coverage=2;isoform_length=4751;expected_accuracy=0.998<br>gnl BL_ORD_ID 43247                      cb452_c17/f2p0/4042<br>isoform=cb452_c69;full_length_coverage=1;non_full_length_coverage=2;isoform_length=3866;expected_accuracy=0.998   | 2   | 2266 | 2266 | 3801 | 127  | 236<br>9 | 2508 | 404<br>2 |
| cb1404_c30/f1p0/2845 | gth_coverage=2;isoform_length=4751;expected_accuracy=0.998<br>gnl BL_ORD_ID 61342   cb1404_c12/f1p0/3355<br>isoform=cb1404_c30;full_length_coverage=1;non_full_length_coverage=0;isoform_length=2845;expected_accuracy=0.999                    | 1   | 2368 | 2363 | 2844 | 133  | 249<br>7 | 2602 | 308<br>6 |
| cb965_c5/f2p7/4283   | gth_coverage=2;isoform_length=4751;expected_accuracy=0.998<br>gnl BL_ORD_ID 20577                      cb965_c22/f1p1/4708<br>isoform=cb965_c5;full_length_coverage=2;non_full_length_coverage=7;isoform_length=4283;expected_accuracy=1.000    | 1   | 3552 | 3550 | 4267 | 1    | 354<br>6 | 3991 | 470<br>8 |
| cb14897_c7/f1p0/1640 | gth_coverage=2;isoform_length=4751;expected_accuracy=0.998<br>gnl BL_ORD_ID 27781                      cb14897_c3/f1p1/1884<br>isoform=cb14897_c7;full_length_coverage=1;non_full_length_coverage=0;isoform_length=1640;expected_accuracy=1.000 | 12  | 1245 | 1240 | 1639 | 28   | 126<br>3 | 1487 | 188<br>4 |
| cb7064_c2/f4p0/1297  | gth_coverage=2;isoform_length=4751;expected_accuracy=0.998<br>gnl BL_ORD_ID 50308   cb7064_c16/f1p0/3334<br>isoform=cb7064_c2;full_length_coverage=4;non_full_length_coverage=0;isoform_length=1297;expected_accuracy=1.000                     | 155 | 1297 | 50   | 155  | 1854 | 299<br>5 | 24   | 129      |

|                         |                                                                                                                                                                             |      |      |      |      |      |      |      |      |
|-------------------------|-----------------------------------------------------------------------------------------------------------------------------------------------------------------------------|------|------|------|------|------|------|------|------|
| cb2177_c46/f1p0/2729    | gnl BL_ORD_ID 35910          cb2177_c22/f1p0/4026<br>isoform=cb2177_c22;full_length_coverage=1;non_full_length_coverage=0;isoform_length=4026;expected_accuracy=0.997       | 1340 | 2722 | 12   | 1341 | 2644 | 4026 | 1    | 1330 |
| cb289_c5/f1p0/4379      | gnl BL_ORD_ID 37736          cb289_c4/f1p0/4413<br>isoform=cb289_c5;full_length_coverage=1;non_full_length_coverage=0;isoform_length=4379;expected_accuracy=0.997           | 1    | 4156 | 4156 | 4305 | 6    | 4163 | 4265 | 4413 |
| cb8277_c3/f1p0/1611     | gnl BL_ORD_ID 7850          cb8277_c2/f1p0/3699<br>isoform=cb8277_c3;full_length_coverage=1;non_full_length_coverage=0;isoform_length=1611;expected_accuracy=0.997          | 1    | 1250 | 1251 | 1589 | 7    | 1251 | 1777 | 2115 |
| cb8564_c17892/f1p0/3277 | gnl BL_ORD_ID 52815          cb8564_c14758/f1p0/4100                                                                                                                        | 200  | 3271 | 1    | 201  | 699  | 3769 | 125  | 325  |
| cb2072_c47/f1p0/1819    | gnl BL_ORD_ID 34951          cb2072_c45/f1p0/2282<br>isoform=cb2072_c45;full_length_coverage=1;non_full_length_coverage=0;isoform_length=2282;expected_accuracy=0.994       | 331  | 1810 | 71   | 330  | 420  | 1899 | 2    | 261  |
| cb3687_c16/f1p3/2980    | gnl BL_ORD_ID 41006          cb3687_c7/f2p0/3068<br>isoform=cb3687_c16;full_length_coverage=1;non_full_length_coverage=3;isoform_length=2980;expected_accuracy=0.998        | 1    | 2002 | 2001 | 2888 | 35   | 2031 | 2181 | 3068 |
| cb8564_c44698/f1p5/2843 | gnl BL_ORD_ID 15315          cb8564_c39014/f1p0/3019<br>isoform=cb8564_c44698;full_length_coverage=1;non_full_length_coverage=5;isoform_length=2843;expected_accuracy=0.997 | 1    | 2514 | 2511 | 2826 | 1    | 2564 | 2691 | 3013 |

|                                                                                                                                                |                                             |     |      |      |      |      |      |      |      |
|------------------------------------------------------------------------------------------------------------------------------------------------|---------------------------------------------|-----|------|------|------|------|------|------|------|
| cb2033_c16/f1p0/2147<br>isoform=cb2033_c16;full_length_coverage=1;non_full_length_coverage=0;isoform_length=2147;expected_accuracy=0.994       | gnl BL_ORD_ID 66631 cb2033_c9/f1p0/2609     | 1   | 1872 | 1868 | 2147 | 1    | 1867 | 2028 | 2308 |
| cb1905_c32/f1p0/2036<br>isoform=cb1905_c32;full_length_coverage=1;non_full_length_coverage=0;isoform_length=2036;expected_accuracy=0.996       | gnl BL_ORD_ID 34533 cb1905_c22/f1p0/2509    | 553 | 2036 | 7    | 553  | 786  | 2269 | 1    | 547  |
| cb396_c48/f1p0/2172<br>isoform=cb396_c48;full_length_coverage=1;non_full_length_coverage=0;isoform_length=2172;expected_accuracy=0.996         | gnl BL_ORD_ID 70866 cb396_c50/f1p0/2950     | 238 | 2101 | 54   | 238  | 1103 | 2966 | 670  | 854  |
| cb2156_c24/f1p1/2545<br>isoform=cb2156_c24;full_length_coverage=1;non_full_length_coverage=1;isoform_length=2545;expected_accuracy=0.991       | gnl BL_ORD_ID 35476 cb2156_c23/f1p1/3009    | 1   | 1422 | 1420 | 2545 | 218  | 1646 | 1771 | 2896 |
| cb9718_c43/f1p0/1655<br>isoform=cb9718_c43;full_length_coverage=1;non_full_length_coverage=0;isoform_length=1655;expected_accuracy=0.996       | gnl BL_ORD_ID 20739 cb9718_c35/f1p2/1802    | 288 | 1655 | 56   | 290  | 335  | 1702 | 1    | 235  |
| cb8564_c40598/f1p4/3119<br>isoform=cb8564_c40598;full_length_coverage=1;non_full_length_coverage=1;isoform_length=3119;expected_accuracy=0.995 | gnl BL_ORD_ID 16681 cb8564_c54233/f1p1/3194 | 2   | 2732 | 2729 | 3049 | 8    | 2753 | 2874 | 3194 |
| cb5058_c1/f1p0/2699<br>isoform=cb5058_c1;full_length_coverage=1;non_full_length_coverage=0;isoform_length=2699;expected_accuracy=0.991         | gnl BL_ORD_ID 44019 cb5058_c0/f1p0/3186     | 1   | 2469 | 2464 | 2593 | 481  | 2953 | 3057 | 3186 |

|                         |                                                                                                                                            |                         |     |      |      |      |      |      |      |      |
|-------------------------|--------------------------------------------------------------------------------------------------------------------------------------------|-------------------------|-----|------|------|------|------|------|------|------|
| cb8531_c1/f1p0/2194     | gnl BL_ORD_ID 10091<br>isoform=cb8531_c0;full_length_coverage=2;non_full_length_coverage=0;isoform_length=2343;expected_accuracy=0.999     | cb8531_c0/f2p0/2343     | 1   | 1452 | 1453 | 2209 | 29   | 1480 | 1580 | 2336 |
| cb8564_c9728/f7p1/3462  | gnl BL_ORD_ID 52659<br>isoform=cb8564_c9728;full_length_coverage=7;non_full_length_coverage=1;isoform_length=3462;expected_accuracy=0.997  | cb8564_c10244/f1p0/4022 | 1   | 2939 | 2937 | 3410 | 41   | 2965 | 3383 | 3869 |
| cb8564_c38035/f1p0/2770 | gnl BL_ORD_ID 56961<br>isoform=cb8564_c38035;full_length_coverage=1;non_full_length_coverage=0;isoform_length=2770;expected_accuracy=0.999 | cb8564_c78609/f1p0/3194 | 19  | 2035 | 2033 | 2756 | 45   | 2064 | 2254 | 2978 |
| cb12931_c15/f1p0/1493   | gnl BL_ORD_ID 55280<br>isoform=cb12931_c15;full_length_coverage=1;non_full_length_coverage=0;isoform_length=1493;expected_accuracy=1.000   | cb8564_c37198/f1p5/2941 | 1   | 1106 | 1104 | 1493 | 1    | 1102 | 2540 | 2929 |
| cb2927_c2/f2p0/3116     | gnl BL_ORD_ID 69003<br>isoform=cb2927_c2;full_length_coverage=2;non_full_length_coverage=0;isoform_length=3116;expected_accuracy=0.995     | cb2927_c5/f1p1/3753     | 12  | 1680 | 1676 | 3096 | 1    | 1685 | 2333 | 3759 |
| cb8564_c45300/f1p4/3014 | gnl BL_ORD_ID 55472<br>isoform=cb8564_c45300;full_length_coverage=1;non_full_length_coverage=4;isoform_length=3014;expected_accuracy=0.996 | cb8564_c42531/f1p0/3996 | 243 | 3014 | 128  | 246  | 1090 | 3863 | 816  | 933  |
| cb4128_c23/f1p0/2488    | gnl BL_ORD_ID 70785<br>isoform=cb4128_c23;full_length_coverage=1;non_full_length_coverage=0;isoform_length=2488;expected_accuracy=0.999    | cb4128_c21/f1p0/3017    | 1   | 1757 | 1756 | 2439 | 2    | 1760 | 2096 | 2779 |

|                          |                                                                                                                                                                           |      |      |      |      |      |          |      |          |
|--------------------------|---------------------------------------------------------------------------------------------------------------------------------------------------------------------------|------|------|------|------|------|----------|------|----------|
| cb8564_c66920/f3p3/2894  | gnl BL_ORD_ID 16879      cb8564_c48606/f1p1/3308<br>isoform=cb8564_c48606;full_length_coverage=1;non_full_length_coverage=1;isoform_length=3308;expected_accuracy=0.998   | 1    | 2153 | 2149 | 2863 | 1    | 215<br>1 | 2587 | 330<br>1 |
| cb781_c2/f3p0/1827       | gnl BL_ORD_ID 6928      cb781_c18/f1p0/2084<br>isoform=cb781_c2;full_length_coverage=3;non_full_length_coverage=0;isoform_length=1827;expected_accuracy=0.999             | 1    | 1243 | 1243 | 1827 | 23   | 126<br>2 | 1367 | 194<br>8 |
| cb649_c40/f1p0/3326      | gnl BL_ORD_ID 49373      cb649_c36/f1p0/4093                                                                                                                              | 1    | 3135 | 3133 | 3349 | 2    | 313<br>2 | 3679 | 390<br>7 |
| cb964_c10/f1p0/2954      | gnl BL_ORD_ID 59137      cb964_c2/f1p0/4848<br>isoform=cb964_c10;full_length_coverage=1;non_full_length_coverage=0;isoform_length=2954;expected_accuracy=0.996            | 147  | 2954 | 1    | 151  | 1674 | 448<br>1 | 213  | 363      |
| cb9442_c4/f1p0/1965      | gnl BL_ORD_ID 59723      cb9442_c8/f1p1/2068                                                                                                                              | 1    | 1455 | 1453 | 1829 | 1    | 145<br>6 | 1668 | 204<br>4 |
| cb8564_c2797/f1p0/2268   | gnl BL_ORD_ID 56487      cb8564_c77730/f1p0/2866<br>isoform=cb8564_c2797;full_length_coverage=1;non_full_length_coverage=0;isoform_length=2268;expected_accuracy=0.992    | 1    | 1374 | 1370 | 2198 | 179  | 154<br>8 | 1802 | 263<br>0 |
| cb181_c38/f1p0/2538      | gnl BL_ORD_ID 66303      cb181_c44/f1p0/2945                                                                                                                              | 1089 | 2510 | 1    | 1094 | 1221 | 264<br>2 | 1    | 109<br>3 |
| cb8564_c122327/f1p0/3916 | gnl BL_ORD_ID 54548      cb8564_c125967/f1p0/4340<br>isoform=cb8564_c122327;full_length_coverage=1;non_full_length_coverage=0;isoform_length=3916;expected_accuracy=0.995 | 2    | 2812 | 2812 | 3916 | 50   | 282<br>2 | 3205 | 431<br>0 |

|                                                                                                                                                |                                                                                                                                                                    |      |      |      |      |      |      |      |      |
|------------------------------------------------------------------------------------------------------------------------------------------------|--------------------------------------------------------------------------------------------------------------------------------------------------------------------|------|------|------|------|------|------|------|------|
| cb6508_c15/f1p0/2527                                                                                                                           | gnl BL_ORD_ID 47554 cb6508_c8/f1p0/3471                                                                                                                            | 1    | 1256 | 1257 | 2218 | 2    | 1257 | 2543 | 3504 |
| cb8564_c15844/f1p3/3061<br>isoform=cb8564_c15844;full_length_coverage=1;non_full_length_coverage=3;isoform_length=3061;expected_accuracy=0.995 | gnl BL_ORD_ID 17091 cb8564_c97736/f2p5/3272<br>isoform=cb8564_c97736;full_length_coverage=2;non_full_length_coverage=5;isoform_length=3272;expected_accuracy=1.000 | 1    | 2692 | 2688 | 3060 | 34   | 2726 | 2899 | 3272 |
| cb4848_c24/f1p0/1860<br>isoform=cb4848_c24;full_length_coverage=1;non_full_length_coverage=0;isoform_length=1860;expected_accuracy=0.999       | gnl BL_ORD_ID 73029 cb4848_c17/f1p0/2140                                                                                                                           | 206  | 1860 | 68   | 205  | 274  | 1926 | 2    | 139  |
| cb1626_c14/f1p0/2173<br>isoform=cb1626_c14;full_length_coverage=1;non_full_length_coverage=0;isoform_length=2173;expected_accuracy=0.999       | gnl BL_ORD_ID 63808 cb1626_c17/f1p0/3006                                                                                                                           | 1001 | 2172 | 1    | 1001 | 1827 | 2999 | 77   | 1092 |
| cb4503_c12/f1p0/2341<br>isoform=cb4503_c12;full_length_coverage=1;non_full_length_coverage=0;isoform_length=2341;expected_accuracy=0.999       | gnl BL_ORD_ID 42041 cb4503_c8/f2p0/2921<br>isoform=cb4503_c8;full_length_coverage=2;non_full_length_coverage=0;isoform_length=2921;expected_accuracy=1.000         | 1    | 1488 | 1486 | 2329 | 166  | 1660 | 2076 | 2921 |
| cb8564_c48953/f1p0/2715                                                                                                                        | gnl BL_ORD_ID 55975 cb8564_c50843/f1p0/4165                                                                                                                        | 1    | 2134 | 2133 | 2584 | 1119 | 3252 | 3639 | 4090 |
| cb507_c4/f1p0/3466                                                                                                                             | gnl BL_ORD_ID 43270 cb507_c1/f1p0/4600<br>isoform=cb507_c1;full_length_coverage=1;non_full_length_coverage=0;isoform_length=4600;expected_accuracy=0.997           | 1    | 2743 | 2739 | 3390 | 1    | 2762 | 3946 | 4597 |
| cb7774_c5/f1p0/3020                                                                                                                            | gnl BL_ORD_ID 51513 cb7774_c3/f1p0/4456                                                                                                                            | 169  | 3042 | 1    | 173  | 1587 | 4460 | 22   | 194  |



|                                                                                                                                                  |                                                                                                                                                                         |     |      |      |      |     |      |      |      |
|--------------------------------------------------------------------------------------------------------------------------------------------------|-------------------------------------------------------------------------------------------------------------------------------------------------------------------------|-----|------|------|------|-----|------|------|------|
| cb416_c28/f1p0/2988<br>isoform=cb416_c28;full_length_coverage=1;non_full_length_coverage=0;isoform_length=2988;expected_accuracy=0.996           | gnl BL_ORD_ID 44207      cb416_c73/f3p0/3007<br>isoform=cb416_c73;full_length_coverage=3;non_full_length_coverage=0;isoform_length=3007;expected_accuracy=1.000         | 125 | 2890 | 1    | 128  | 240 | 3007 | 1    | 129  |
| cb7880_c5/f1p0/2230                                                                                                                              | gnl BL_ORD_ID 51597      cb7880_c3/f1p0/2527                                                                                                                            | 1   | 1374 | 1371 | 2217 | 31  | 1403 | 1616 | 2461 |
| cb8564_c36056/f1p0/2652<br>isoform=cb8564_c36056;full_length_coverage=1;non_full_length_coverage=0;isoform_length=2652;expected_accuracy=0.999   | gnl BL_ORD_ID 55866      cb8564_c47522/f1p0/2954                                                                                                                        | 248 | 2651 | 22   | 251  | 445 | 2849 | 70   | 301  |
| cb5125_c36/f1p0/1789<br>isoform=cb5125_c36;full_length_coverage=1;non_full_length_coverage=0;isoform_length=1789;expected_accuracy=0.998         | gnl BL_ORD_ID 42295      cb5125_c41/f1p2/2137<br>isoform=cb5125_c41;full_length_coverage=11;non_full_length_coverage=2;isoform_length=2137;expected_accuracy=1.000      | 1   | 1163 | 1158 | 1789 | 73  | 1240 | 1446 | 2077 |
| cb8564_c17543/f1p10/2689<br>isoform=cb8564_c17543;full_length_coverage=1;non_full_length_coverage=10;isoform_length=2689;expected_accuracy=0.999 | gnl BL_ORD_ID 14058      cb8564_c23936/f1p0/3016<br>isoform=cb8564_c23936;full_length_coverage=1;non_full_length_coverage=0;isoform_length=3016;expected_accuracy=0.995 | 1   | 1707 | 1705 | 2579 | 1   | 1716 | 2143 | 3016 |
| cb8564_c46939/f1p1/2926                                                                                                                          | gnl BL_ORD_ID 15152      cb8564_c38629/f2p1/3246<br>isoform=cb8564_c38629;full_length_coverage=2;non_full_length_coverage=1;isoform_length=3246;expected_accuracy=0.993 | 1   | 2134 | 2130 | 2870 | 1   | 2173 | 2278 | 3020 |
| cb8564_c51661/f1p0/3132                                                                                                                          | gnl BL_ORD_ID 14067      cb8564_c33962/f2p1/3330<br>isoform=cb8564_c33962;full_length_coverage=2;non_full_length_coverage=1;isoform_length=3330;expected_accuracy=1.000 | 1   | 2104 | 2099 | 3077 | 1   | 2105 | 2262 | 3240 |

|                                                                                                                                                  |                                                                                                                                                                           |      |      |      |      |      |      |      |      |
|--------------------------------------------------------------------------------------------------------------------------------------------------|---------------------------------------------------------------------------------------------------------------------------------------------------------------------------|------|------|------|------|------|------|------|------|
| cb4108_c0/f3p0/2143<br>isoform=cb4108_c0;full_length_coverage=3;non_full_length_coverage=0;isoform_length=2143;expected_accuracy=1.000           | gnl BL_ORD_ID 40378      cb4108_c1/f1p0/3431<br>isoform=cb4108_c1;full_length_coverage=1;non_full_length_coverage=0;isoform_length=3431;expected_accuracy=0.998           | 1    | 1083 | 1083 | 2098 | 16   | 1097 | 2415 | 3431 |
| cb8418_c0/f2p0/2231<br>isoform=cb8418_c0;full_length_coverage=2;non_full_length_coverage=0;isoform_length=2231;expected_accuracy=0.997           | gnl BL_ORD_ID 9126      cb8418_c1/f1p0/2365<br>isoform=cb8418_c1;full_length_coverage=1;non_full_length_coverage=0;isoform_length=2365;expected_accuracy=0.991            | 595  | 2231 | 78   | 595  | 717  | 2361 | 1    | 515  |
| cb8564_c180116/f1p0/2944<br>isoform=cb8564_c180116;full_length_coverage=1;non_full_length_coverage=0;isoform_length=2944;expected_accuracy=0.996 | gnl BL_ORD_ID 55600      cb8564_c46484/f1p0/3151                                                                                                                          | 106  | 2522 | 2520 | 2944 | 5    | 2441 | 2670 | 3093 |
| cb3941_c92/f1p0/2573                                                                                                                             | gnl BL_ORD_ID 39558      cb3941_c41/f1p0/2822<br>isoform=cb3941_c41;full_length_coverage=1;non_full_length_coverage=0;isoform_length=2822;expected_accuracy=0.991         | 136  | 2230 | 11   | 137  | 728  | 2822 | 6    | 131  |
| cb5307_c9/f1p0/2902                                                                                                                              | gnl BL_ORD_ID 73771      cb5307_c16/f1p0/3281                                                                                                                             | 1204 | 2896 | 11   | 1204 | 1295 | 2988 | 2    | 1187 |
| cb8564_c73853/f1p0/2443<br>isoform=cb8564_c73853;full_length_coverage=1;non_full_length_coverage=0;isoform_length=2443;expected_accuracy=1.000   | gnl BL_ORD_ID 13313      cb8564_c188075/f1p2/2904<br>isoform=cb8564_c188075;full_length_coverage=1;non_full_length_coverage=2;isoform_length=2904;expected_accuracy=0.996 | 1    | 1281 | 1276 | 2443 | 98   | 1374 | 1654 | 2829 |
| cb5819_c17/f2p0/2480<br>isoform=cb5819_c17;full_length_coverage=2;non_full_length_coverage=0;isoform_length=2480;expected_accuracy=0.996         | gnl BL_ORD_ID 44667      cb5819_c6/f1p0/2565<br>isoform=cb5819_c6;full_length_coverage=1;non_full_length_coverage=0;isoform_length=2565;expected_accuracy=1.000           | 1    | 1752 | 1748 | 2456 | 1    | 1755 | 1858 | 2565 |

|                         |                                                                                                                                                                                         |     |      |      |      |      |          |      |          |
|-------------------------|-----------------------------------------------------------------------------------------------------------------------------------------------------------------------------------------|-----|------|------|------|------|----------|------|----------|
| cb626_c60/f1p1/4254     | gnl BL_ORD_ID 4060                      cb626_c17/f1p0/4935<br>isoform=cb626_c17;full_length_coverage=1;non_full_length_coverage=0;isoform_length=4935;expected_accuracy=0.993          | 32  | 3661 | 3659 | 4223 | 1    | 358<br>5 | 4375 | 493<br>5 |
| cb500_c17/f1p0/2323     | gnl BL_ORD_ID 70944                      cb500_c35/f1p0/3166<br>isoform=cb500_c17;full_length_coverage=1;non_full_length_coverage=0;isoform_length=2323;expected_accuracy=0.997         | 1   | 1293 | 1288 | 2216 | 700  | 199<br>2 | 2124 | 305<br>2 |
| cb6719_c56/f1p0/2578    | gnl BL_ORD_ID 4666                      cb6719_c24/f1p0/2613<br>isoform=cb6719_c24;full_length_coverage=1;non_full_length_coverage=0;isoform_length=2613;expected_accuracy=0.998        | 1   | 1366 | 1365 | 2419 | 72   | 143<br>7 | 1559 | 261<br>3 |
| cb8564_c20384/f1p4/2475 | gnl BL_ORD_ID 17162                      cb8564_c87465/f2p9/3179<br>isoform=cb8564_c20384;full_length_coverage=1;non_full_length_coverage=4;isoform_length=2475;expected_accuracy=0.999 | 1   | 1492 | 1493 | 2475 | 1177 | 266<br>7 | 2010 | 299<br>3 |
| cb398_c5/f1p0/4384      | gnl BL_ORD_ID 39099                      cb398_c3/f1p0/4458<br>isoform=cb398_c3;full_length_coverage=1;non_full_length_coverage=0;isoform_length=4458;expected_accuracy=0.996           | 168 | 4235 | 1    | 172  | 396  | 445<br>8 | 33   | 205      |
| cb3848_c1/f4p0/2367     | gnl BL_ORD_ID 40468                      cb3848_c17/f1p0/3076<br>isoform=cb3848_c1;full_length_coverage=4;non_full_length_coverage=0;isoform_length=2367;expected_accuracy=0.995        | 2   | 2023 | 2021 | 2315 | 1    | 203<br>3 | 2759 | 305<br>0 |
| cb9700_c5/f1p0/1823     | gnl BL_ORD_ID 59913                      cb9700_c1/f1p0/2092<br>isoform=cb9700_c5;full_length_coverage=1;non_full_length_coverage=0;isoform_length=1823;expected_accuracy=0.992         | 1   | 1520 | 1519 | 1823 | 29   | 154<br>8 | 1667 | 197<br>1 |

|                                                                                                                     |                                                                                                                     |                         |     |      |      |      |      |      |      |      |
|---------------------------------------------------------------------------------------------------------------------|---------------------------------------------------------------------------------------------------------------------|-------------------------|-----|------|------|------|------|------|------|------|
| ngth_coverage=0;isoform_length=1823;expected_accuracy=0.999                                                         |                                                                                                                     |                         |     |      |      |      |      |      |      |      |
| cb17756_c15/f1p0/1779                                                                                               | gnl BL_ORD_ID 13304                                                                                                 | cb8564_c20604/f1p0/4741 |     |      |      |      |      |      |      |      |
| isoform=cb17756_c15;full_length_coverage=1;non_full_length_coverage=0;isoform_length=1779;expected_accuracy=0.996   | isoform=cb8564_c20604;full_length_coverage=1;non_full_length_coverage=0;isoform_length=4741;expected_accuracy=0.996 |                         | 108 | 1779 | 1    | 110  | 1322 | 2989 | 361  | 471  |
| cb7836_c3/f1p0/1935                                                                                                 | gnl BL_ORD_ID 6770                                                                                                  | cb7836_c0/f1p0/2522     |     |      |      |      |      |      |      |      |
|                                                                                                                     | isoform=cb7836_c0;full_length_coverage=1;non_full_length_coverage=0;isoform_length=2522;expected_accuracy=0.993     |                         | 562 | 1946 | 7    | 563  | 1138 | 2519 | 1    | 557  |
| cb8564_c1631/f1p0/2766                                                                                              |                                                                                                                     |                         |     |      |      |      |      |      |      |      |
| isoform=cb8564_c1631;full_length_coverage=1;non_full_length_coverage=0;isoform_length=2766;expected_accuracy=0.999  | gnl BL_ORD_ID 56577                                                                                                 | cb8564_c7828/f1p0/2920  | 124 | 2766 | 1    | 126  | 281  | 2921 | 1    | 124  |
| cb3580_c26/f1p0/2466                                                                                                | gnl BL_ORD_ID 40393                                                                                                 | cb3580_c24/f1p0/3582    |     |      |      |      |      |      |      |      |
|                                                                                                                     | isoform=cb3580_c24;full_length_coverage=1;non_full_length_coverage=0;isoform_length=3582;expected_accuracy=0.992    |                         | 180 | 2434 | 1    | 185  | 1337 | 3582 | 765  | 949  |
| cb8564_c81580/f1p0/2450                                                                                             | gnl BL_ORD_ID 15502                                                                                                 | cb8564_c75170/f2p0/2677 |     |      |      |      |      |      |      |      |
| isoform=cb8564_c81580;full_length_coverage=1;non_full_length_coverage=0;isoform_length=2450;expected_accuracy=0.997 | isoform=cb8564_c75170;full_length_coverage=2;non_full_length_coverage=0;isoform_length=2677;expected_accuracy=0.994 |                         | 1   | 1786 | 1781 | 2450 | 1    | 1787 | 1926 | 2594 |
| cb1524_c8/f1p0/3674                                                                                                 | gnl BL_ORD_ID 28439                                                                                                 | cb1524_c30/f1p0/3792    |     |      |      |      |      |      |      |      |
| isoform=cb1524_c8;full_length_coverage=1;non_full_length_coverage=0;isoform_length=3674;expected_accuracy=0.995     | isoform=cb1524_c30;full_length_coverage=1;non_full_length_coverage=0;isoform_length=3792;expected_accuracy=0.994    |                         | 157 | 3670 | 1    | 156  | 256  | 3792 | 2    | 156  |

|                                                                                                                                      |                                                                                                                                                                 |      |      |      |      |      |          |      |          |
|--------------------------------------------------------------------------------------------------------------------------------------|-----------------------------------------------------------------------------------------------------------------------------------------------------------------|------|------|------|------|------|----------|------|----------|
| cb993_c8/f2p0/2754<br>isoform=cb993_c8;full_length_coverage=2;non_full_length_coverage=0;isoform_length=2754;expected_accuracy=0.999 | gnl BL_ORD_ID 19610      cb993_c16/f1p0/4226<br>isoform=cb993_c16;full_length_coverage=1;non_full_length_coverage=0;isoform_length=4226;expected_accuracy=0.997 | 1    | 2282 | 2280 | 2754 | 1    | 227<br>9 | 3676 | 414<br>9 |
| cb938_c15/f1p0/3219                                                                                                                  | gnl BL_ORD_ID 19888      cb938_c17/f1p1/3461<br>isoform=cb938_c17;full_length_coverage=1;non_full_length_coverage=1;isoform_length=3461;expected_accuracy=0.991 | 1    | 2546 | 2541 | 3185 | 1    | 254<br>7 | 2825 | 346<br>1 |
| cb792_c8/f3p0/3700<br>isoform=cb792_c8;full_length_coverage=3;non_full_length_coverage=0;isoform_length=3700;expected_accuracy=1.000 | gnl BL_ORD_ID 50981      cb792_c47/f1p0/3981                                                                                                                    | 186  | 3673 | 1    | 187  | 411  | 390<br>1 | 93   | 293      |
| cb8658_c2/f1p0/2311                                                                                                                  | gnl BL_ORD_ID 18756      cb8658_c6/f1p0/3454<br>isoform=cb8658_c6;full_length_coverage=1;non_full_length_coverage=0;isoform_length=3454;expected_accuracy=0.996 | 1    | 1701 | 1700 | 2184 | 49   | 174<br>5 | 2967 | 345<br>4 |
| cb626_c67/f1p1/4388                                                                                                                  | gnl BL_ORD_ID 47167      cb626_c79/f1p0/5202                                                                                                                    | 1831 | 4309 | 111  | 1836 | 2580 | 505<br>7 | 15   | 173<br>9 |
| cb8564_c4643/f1p1/2554                                                                                                               | gnl BL_ORD_ID 56658      cb8564_c51371/f1p1/2943                                                                                                                | 1    | 1705 | 1700 | 2540 | 1    | 170<br>5 | 1838 | 268<br>1 |
| cb1512_c15/f1p1/3322                                                                                                                 | gnl BL_ORD_ID 27951      cb1512_c4/f1p1/4292<br>isoform=cb1512_c4;full_length_coverage=1;non_full_length_coverage=1;isoform_length=4292;expected_accuracy=0.997 | 1    | 1681 | 1681 | 3271 | 129  | 180<br>8 | 2672 | 429<br>2 |
| cb8564_c17543/f1p10/2689<br>isoform=cb8564_c17543;full_length_coverage=1;non_f                                                       | gnl BL_ORD_ID 56381      cb8564_c75626/f1p2/3199                                                                                                                | 1    | 2117 | 2115 | 2586 | 1    | 2116     | 2611 | 308<br>1 |

|                                                                                                                                          |                     |                                                                                                                                                |      |      |      |      |      |      |      |      |  |  |
|------------------------------------------------------------------------------------------------------------------------------------------|---------------------|------------------------------------------------------------------------------------------------------------------------------------------------|------|------|------|------|------|------|------|------|--|--|
| ull_length_coverage=10;isoform_length=2689;expected_accuracy=0.999                                                                       |                     |                                                                                                                                                |      |      |      |      |      |      |      |      |  |  |
| cb8564_c75626/f1p2/3199                                                                                                                  | gnl BL_ORD_ID 52063 | cb8564_c11680/f1p1/3676                                                                                                                        | 25   | 2674 | 2672 | 3151 | 53   | 2692 | 2993 | 3471 |  |  |
| cb11867_c3/f1p0/1755<br>isoform=cb11867_c3;full_length_coverage=1;non_full_length_coverage=0;isoform_length=1755;expected_accuracy=1.000 | gnl BL_ORD_ID 13423 | cb8564_c23368/f1p0/2544<br>isoform=cb8564_c23368;full_length_coverage=1;non_full_length_coverage=0;isoform_length=2544;expected_accuracy=0.998 | 435  | 1755 | 8    | 440  | 1225 | 2544 | 1    | 433  |  |  |
| cb3800_c3/f3p0/3108<br>isoform=cb3800_c3;full_length_coverage=3;non_full_length_coverage=0;isoform_length=3108;expected_accuracy=1.000   | gnl BL_ORD_ID 40736 | cb3800_c17/f1p0/3180<br>isoform=cb3800_c17;full_length_coverage=1;non_full_length_coverage=0;isoform_length=3180;expected_accuracy=0.993       | 1037 | 3046 | 1    | 1038 | 1171 | 3180 | 22   | 1053 |  |  |
| cb5516_c26/f1p0/3029<br>isoform=cb5516_c26;full_length_coverage=1;non_full_length_coverage=0;isoform_length=3029;expected_accuracy=1.000 | gnl BL_ORD_ID 74009 | cb5516_c65/f1p1/3150                                                                                                                           | 1    | 2327 | 2322 | 2971 | 5    | 2330 | 2455 | 3104 |  |  |
| cb6825_c19/f1p0/2295<br>isoform=cb6825_c19;full_length_coverage=1;non_full_length_coverage=0;isoform_length=2295;expected_accuracy=0.997 | gnl BL_ORD_ID 4067  | cb6825_c32/f1p1/2521<br>isoform=cb6825_c32;full_length_coverage=1;non_full_length_coverage=1;isoform_length=2521;expected_accuracy=0.997       | 1    | 1494 | 1489 | 2292 | 4    | 1497 | 1670 | 2472 |  |  |
| cb10464_c4/f1p0/1117<br>isoform=cb10464_c4;full_length_coverage=1;non_full_length_coverage=0;isoform_length=1117;expected_accuracy=0.990 | gnl BL_ORD_ID 1828  | cb10464_c0/f4p0/1450<br>isoform=cb10464_c0;full_length_coverage=4;non_full_length_coverage=0;isoform_length=1450;expected_accuracy=1.000       | 376  | 1113 | 9    | 380  | 713  | 1450 | 1    | 373  |  |  |
| cb8564_c119678/f2p0/2739<br>isoform=cb8564_c119678;full_length_coverage=2;non_                                                           | gnl BL_ORD_ID 11469 | cb8564_c13203/f2p0/2827<br>isoform=cb8564_c13203;full_length_coverage=2;non_                                                                   | 1    | 2299 | 2298 | 2707 | 12   | 2301 | 2419 | 2827 |  |  |

|                                                                                                                                            |                                                                                                                                                                    |     |      |      |      |      |          |      |          |  |
|--------------------------------------------------------------------------------------------------------------------------------------------|--------------------------------------------------------------------------------------------------------------------------------------------------------------------|-----|------|------|------|------|----------|------|----------|--|
| full_length_coverage=0;isoform_length=2739;expected_accuracy=1.000<br>cb8564_c13319/f1p3/2892                                              | ll_length_coverage=0;isoform_length=2827;expected_accuracy=0.999                                                                                                   |     |      |      |      |      |          |      |          |  |
| isoform=cb8564_c13319;full_length_coverage=1;non_full_length_coverage=3;isoform_length=2892;expected_accuracy=0.996<br>cb9780_c1/f2p0/1733 | gnl BL_ORD_ID 55298 cb8564_c37611/f1p0/3259                                                                                                                        | 155 | 2786 | 1    | 156  | 323  | 295<br>6 | 32   | 187      |  |
| isoform=cb9780_c1;full_length_coverage=2;non_full_length_coverage=0;isoform_length=1733;expected_accuracy=0.995<br>cb1956_c5/f2p0/2813     | gnl BL_ORD_ID 19369 cb9780_c0/f33p0/1865<br>isoform=cb9780_c0;full_length_coverage=33;non_full_length_coverage=0;isoform_length=1865;expected_accuracy=1.000       | 117 | 1727 | 1    | 120  | 259  | 186<br>5 | 6    | 121      |  |
| isoform=cb1956_c5;full_length_coverage=2;non_full_length_coverage=0;isoform_length=2813;expected_accuracy=0.997<br>cb8564_c74379/f1p1/2508 | gnl BL_ORD_ID 36248 cb1956_c2/f5p0/3073<br>isoform=cb1956_c2;full_length_coverage=5;non_full_length_coverage=0;isoform_length=3073;expected_accuracy=0.999         | 1   | 1453 | 1451 | 2812 | 85   | 153<br>2 | 1692 | 307<br>3 |  |
| cb8564_c74379/f1p1/2508                                                                                                                    | gnl BL_ORD_ID 15835 cb8564_c73664/f5p3/2665<br>isoform=cb8564_c73664;full_length_coverage=5;non_full_length_coverage=3;isoform_length=2665;expected_accuracy=0.994 | 1   | 1645 | 1642 | 2352 | 3    | 165<br>5 | 1860 | 257<br>0 |  |
| cb9467_c3/f4p0/2200                                                                                                                        | gnl BL_ORD_ID 20200 cb9467_c17/f1p0/3298<br>isoform=cb9467_c17;full_length_coverage=1;non_full_length_coverage=0;isoform_length=3298;expected_accuracy=1.000       | 258 | 2200 | 96   | 257  | 1353 | 329<br>5 | 1    | 162      |  |
| cb4263_c3/f1p1/3036                                                                                                                        | gnl BL_ORD_ID 43863 cb4263_c0/f1p1/3386<br>isoform=cb4263_c0;full_length_coverage=1;non_full_length_coverage=1;isoform_length=3386;expected_accuracy=0.992         | 263 | 3038 | 1    | 265  | 623  | 338<br>6 | 86   | 350      |  |

|                                                                                                                                                |                                                                                                                                                                           |      |      |      |      |      |      |      |      |
|------------------------------------------------------------------------------------------------------------------------------------------------|---------------------------------------------------------------------------------------------------------------------------------------------------------------------------|------|------|------|------|------|------|------|------|
| cb8564_c32509/f1p1/2880<br>isoform=cb8564_c32509;full_length_coverage=1;non_full_length_coverage=1;isoform_length=2880;expected_accuracy=0.991 | gnl BL_ORD_ID 14531      cb8564_c41778/f1p9/3482<br>isoform=cb8564_c41778;full_length_coverage=1;non_full_length_coverage=9;isoform_length=3482;expected_accuracy=0.992   | 241  | 2877 | 2    | 245  | 812  | 3416 | 10   | 247  |
| cb12931_c15/f1p0/1493<br>isoform=cb12931_c15;full_length_coverage=1;non_full_length_coverage=0;isoform_length=1493;expected_accuracy=1.000     | gnl BL_ORD_ID 13559      cb8564_c183540/f1p0/2769<br>isoform=cb8564_c183540;full_length_coverage=1;non_full_length_coverage=0;isoform_length=2769;expected_accuracy=0.996 | 1    | 1106 | 1104 | 1492 | 1    | 1102 | 2382 | 2769 |
| cb8564_c72680/f1p0/2685                                                                                                                        | gnl BL_ORD_ID 12821      cb8564_c156372/f1p3/2909<br>isoform=cb8564_c156372;full_length_coverage=1;non_full_length_coverage=3;isoform_length=2909;expected_accuracy=1.000 | 1    | 1735 | 1730 | 2636 | 45   | 1782 | 1961 | 2867 |
| cb8113_c5/f1p1/2305<br>isoform=cb8113_c5;full_length_coverage=1;non_full_length_coverage=1;isoform_length=2305;expected_accuracy=0.995         | gnl BL_ORD_ID 8750      cb8113_c2/f1p1/2633<br>isoform=cb8113_c2;full_length_coverage=1;non_full_length_coverage=1;isoform_length=2633;expected_accuracy=0.997            | 1139 | 2305 | 1    | 1138 | 1467 | 2633 | 15   | 1152 |
| cb8564_c148937/f2p0/2793                                                                                                                       | gnl BL_ORD_ID 57112      cb8564_c83553/f1p0/3004                                                                                                                          | 306  | 2796 | 89   | 303  | 349  | 2840 | 1    | 215  |
| cb2692_c3/f1p0/1958                                                                                                                            | gnl BL_ORD_ID 37633      cb2692_c2/f1p0/3834<br>isoform=cb2692_c2;full_length_coverage=1;non_full_length_coverage=0;isoform_length=3834;expected_accuracy=0.997           | 290  | 1977 | 6    | 291  | 2142 | 3823 | 1    | 287  |
| cb7037_c5/f1p0/2408                                                                                                                            | gnl BL_ORD_ID 47824      cb7037_c1/f1p0/2620                                                                                                                              | 1    | 2028 | 2028 | 2386 | 103  | 2130 | 2245 | 2610 |
| cb8564_c77710/f1p0/1826                                                                                                                        | gnl BL_ORD_ID 13694      cb8564_c19189/f1p1/3379<br>isoform=cb8564_c19189;full_length_coverage=1;non_full_length_coverage=0;isoform_length=3379;expected_accuracy=0.997   | 479  | 1645 | 5    | 481  | 2222 | 3379 | 1    | 468  |



|                         |                                                                                                                                                                                                                                                            |     |      |      |      |      |      |      |      |
|-------------------------|------------------------------------------------------------------------------------------------------------------------------------------------------------------------------------------------------------------------------------------------------------|-----|------|------|------|------|------|------|------|
| cb8564_c48153/f1p0/3083 | <p>ll_length_coverage=1;isoform_length=3379;expected_accuracy=0.991</p> <p>gnl BL_ORD_ID 14531      cb8564_c41778/f1p9/3482</p> <p>isoform=cb8564_c41778;full_length_coverage=1;non_full_length_coverage=9;isoform_length=3482;expected_accuracy=0.992</p> | 251 | 2896 | 13   | 255  | 812  | 3459 | 1    | 247  |
| cb8747_c11/f1p0/1868    | <p>gnl BL_ORD_ID 17793      cb8747_c13/f6p0/1942</p> <p>isoform=cb8747_c13;full_length_coverage=6;non_full_length_coverage=0;isoform_length=1942;expected_accuracy=1.000</p>                                                                               | 526 | 1805 | 6    | 528  | 663  | 1942 | 22   | 544  |
| cb16245_c3/f1p0/1340    | gnl BL_ORD_ID 48381      cb10317_c4/f1p0/1797                                                                                                                                                                                                              | 351 | 1303 | 9    | 354  | 828  | 1806 | 3    | 348  |
| cb944_c103/f2p0/1192    | gnl BL_ORD_ID 21044      cb944_c16/f3p0/1974                                                                                                                                                                                                               | 391 | 1192 | 51   | 391  | 1166 | 1969 | 149  | 489  |
| cb8564_c18575/f1p0/1939 | <p>isoform=cb944_c103;full_length_coverage=2;non_full_length_coverage=0;isoform_length=1192;expected_accuracy=0.999</p> <p>isoform=cb8564_c18575;full_length_coverage=1;non_full_length_coverage=0;isoform_length=1939;expected_accuracy=0.990</p>         | 1   | 1427 | 1422 | 1939 | 815  | 2254 | 3235 | 3761 |
| cb9270_c3/f1p0/2645     | <p>gnl BL_ORD_ID 55754      cb8564_c24444/f1p0/4497</p> <p>gnl BL_ORD_ID 20685      cb9270_c2/f1p0/2756</p> <p>isoform=cb9270_c2;full_length_coverage=1;non_full_length_coverage=0;isoform_length=2756;expected_accuracy=0.997</p>                         | 632 | 2534 | 68   | 633  | 857  | 2756 | 26   | 589  |
| cb8564_c50151/f1p0/3198 | gnl BL_ORD_ID 56041      cb8564_c53077/f1p2/3406                                                                                                                                                                                                           | 341 | 3198 | 6    | 341  | 452  | 3287 | 1    | 337  |

|                                                                                                                       |                                                                                                                      |                          |     |      |      |      |      |      |      |      |      |   |
|-----------------------------------------------------------------------------------------------------------------------|----------------------------------------------------------------------------------------------------------------------|--------------------------|-----|------|------|------|------|------|------|------|------|---|
| ull_length_coverage=0;isoform_length=3198;expected_accuracy=0.995                                                     |                                                                                                                      |                          |     |      |      |      |      |      |      |      |      |   |
| cb8564_c53036/f1p0/2917                                                                                               | gnl BL_ORD_ID 15003                                                                                                  | cb8564_c43733/f1p0/3701  |     |      |      |      |      |      |      |      |      |   |
| isoform=cb8564_c53036;full_length_coverage=1;non_full_length_coverage=0;isoform_length=2917;expected_accuracy=0.999   | isoform=cb8564_c43733;full_length_coverage=1;non_full_length_coverage=0;isoform_length=3701;expected_accuracy=0.999  |                          | 235 | 2902 | 1    | 238  | 1063 | 370  | 1    | 238  |      |   |
| cb8564_c39136/f1p0/3036                                                                                               | gnl BL_ORD_ID 55910                                                                                                  | cb8564_c48645/f1p1/3287  |     |      |      |      |      |      |      |      |      |   |
| isoform=cb8564_c39136;full_length_coverage=1;non_full_length_coverage=0;isoform_length=3036;expected_accuracy=0.998   |                                                                                                                      |                          | 12  | 2089 | 2085 | 2972 | 17   | 209  | 8    | 2225 | 3113 |   |
| cb1039_c25/f1p0/3513                                                                                                  | gnl BL_ORD_ID 1556                                                                                                   | cb1039_c41/f1p0/4155     |     |      |      |      |      |      |      |      |      |   |
|                                                                                                                       | isoform=cb1039_c41;full_length_coverage=1;non_full_length_coverage=0;isoform_length=4155;expected_accuracy=0.999     |                          | 2   | 2198 | 2198 | 3406 | 415  | 262  | 6    | 2732 | 394  | 0 |
| cb8564_c146299/f10p7/3623                                                                                             | gnl BL_ORD_ID 58077                                                                                                  | cb8564_c88175/f1p0/4011  |     |      |      |      |      |      |      |      |      |   |
| isoform=cb8564_c146299;full_length_coverage=10;non_full_length_coverage=7;isoform_length=3623;expected_accuracy=0.999 |                                                                                                                      |                          | 16  | 2746 | 2746 | 3517 | 12   | 274  | 2    | 3254 | 402  | 0 |
| cb18456_c1419/f5p0/1798                                                                                               | gnl BL_ORD_ID 9181                                                                                                   | cb8564_c107375/f7p0/2006 |     |      |      |      |      |      |      |      |      |   |
| isoform=cb18456_c1419;full_length_coverage=5;non_full_length_coverage=0;isoform_length=1798;expected_accuracy=1.000   | isoform=cb8564_c107375;full_length_coverage=7;non_full_length_coverage=0;isoform_length=2006;expected_accuracy=0.997 |                          | 247 | 1798 | 3    | 247  | 451  | 200  | 2    | 1    | 244  |   |
| cb8564_c42654/f1p1/2906                                                                                               | gnl BL_ORD_ID 14410                                                                                                  | cb8564_c44256/f1p1/3267  |     |      |      |      |      |      |      |      |      |   |
| isoform=cb8564_c42654;full_length_coverage=1;non_full_length_coverage=1;isoform_length=2906;expected_accuracy=0.990   | isoform=cb8564_c44256;full_length_coverage=1;non_full_length_coverage=1;isoform_length=3267;expected_accuracy=0.995  |                          | 1   | 2130 | 2126 | 2824 | 1    | 2119 | 2553 |      | 324  | 7 |

|                          |                                                                                                                                                                                          |     |      |      |      |      |          |      |          |
|--------------------------|------------------------------------------------------------------------------------------------------------------------------------------------------------------------------------------|-----|------|------|------|------|----------|------|----------|
| cb6785_c17/f1p0/2283     | gnl BL_ORD_ID 5434                      cb6785_c11/f1p0/2230<br>isoform=cb6785_c11;full_length_coverage=1;non_full_length_coverage=0;isoform_length=2230;expected_accuracy=0.990         | 495 | 2087 | 84   | 498  | 591  | 218<br>2 | 1    | 420      |
| cb14637_c1/f1p0/1701     | gnl BL_ORD_ID 17509                      cb8564_c824/f2p0/4292<br>isoform=cb8564_c824;full_length_coverage=2;non_full_length_coverage=0;isoform_length=4292;expected_accuracy=1.000      | 331 | 1706 | 4    | 331  | 2917 | 429<br>2 | 1    | 328      |
| cb2737_c9/f2p0/2910      | gnl BL_ORD_ID 68778                      cb2737_c36/f1p0/3051<br>isoform=cb2737_c9;full_length_coverage=2;non_full_length_coverage=0;isoform_length=2910;expected_accuracy=0.993         | 210 | 2886 | 2    | 210  | 396  | 307<br>9 | 1    | 210      |
| cb8564_c21778/f1p0/3229  | gnl BL_ORD_ID 52049                      cb8564_c11237/f1p0/3521<br>isoform=cb8564_c21778;full_length_coverage=1;non_full_length_coverage=0;isoform_length=3229;expected_accuracy=0.995  | 241 | 3205 | 1    | 242  | 384  | 335<br>1 | 7    | 248      |
| cb4286_c14/f1p0/2234     | gnl BL_ORD_ID 42399                      cb4286_c2/f1p0/3381<br>isoform=cb4286_c14;full_length_coverage=1;non_full_length_coverage=0;isoform_length=2234;expected_accuracy=0.996         | 767 | 2234 | 84   | 769  | 1908 | 337<br>6 | 1    | 702      |
| cb8564_c180116/f1p0/2944 | gnl BL_ORD_ID 55522                      cb8564_c44123/f1p1/3230<br>isoform=cb8564_c180116;full_length_coverage=1;non_full_length_coverage=0;isoform_length=2944;expected_accuracy=0.996 | 19  | 2522 | 2520 | 2944 | 15   | 251<br>5 | 2743 | 316<br>7 |
| cb1549_c11/f1p0/3749     | gnl BL_ORD_ID 63738                      cb1549_c10/f1p1/3944<br>isoform=cb1549_c11;full_length_coverage=1;non_full_length_coverage=0;isoform_length=3749;expected_accuracy=0.996        | 1   | 3472 | 3468 | 3736 | 61   | 353<br>1 | 3660 | 392<br>8 |

|                                                                                                                      |                                                                                                                     |                         |     |      |      |      |     |      |      |      |
|----------------------------------------------------------------------------------------------------------------------|---------------------------------------------------------------------------------------------------------------------|-------------------------|-----|------|------|------|-----|------|------|------|
| ength_coverage=0;isoform_length=3749;expected_accuracy=0.996                                                         |                                                                                                                     |                         |     |      |      |      |     |      |      |      |
| cb2910_c13/f1p0/2551                                                                                                 | gnl BL_ORD_ID 38136                                                                                                 | cb2910_c2/f4p2/2811     |     |      |      |      |     |      |      |      |
| isoform=cb2910_c13;full_length_coverage=1;non_full_length_coverage=0;isoform_length=2551;expected_accuracy=0.998     | isoform=cb2910_c2;full_length_coverage=4;non_full_length_coverage=2;isoform_length=2811;expected_accuracy=1.000     |                         | 1   | 1402 | 1402 | 2551 | 99  | 1502 | 1626 | 2774 |
| cb8564_c179291/f1p0/3112                                                                                             | gnl BL_ORD_ID 55162                                                                                                 | cb8564_c34284/f1p0/3282 |     |      |      |      |     |      |      |      |
| isoform=cb8564_c179291;full_length_coverage=1;non_full_length_coverage=0;isoform_length=3112;expected_accuracy=0.994 |                                                                                                                     |                         | 166 | 3112 | 1    | 170  | 290 | 3237 | 9    | 178  |
| cb8564_c44005/f1p0/3815                                                                                              | gnl BL_ORD_ID 15996                                                                                                 | cb8564_c66839/f6p1/4041 |     |      |      |      |     |      |      |      |
| isoform=cb8564_c44005;full_length_coverage=1;non_full_length_coverage=0;isoform_length=3815;expected_accuracy=0.993  | isoform=cb8564_c66839;full_length_coverage=6;non_full_length_coverage=1;isoform_length=4041;expected_accuracy=1.000 |                         | 1   | 2046 | 2041 | 3815 | 6   | 2061 | 2161 | 3943 |
| cb8564_c123261/f1p0/2282                                                                                             | gnl BL_ORD_ID 17527                                                                                                 | cb8564_c84215/f1p0/3183 |     |      |      |      |     |      |      |      |
| isoform=cb8564_c123261;full_length_coverage=1;non_full_length_coverage=0;isoform_length=2282;expected_accuracy=1.000 | isoform=cb8564_c84215;full_length_coverage=1;non_full_length_coverage=0;isoform_length=3183;expected_accuracy=0.997 |                         | 1   | 1730 | 1728 | 2217 | 83  | 1810 | 2697 | 3183 |
| cb3941_c21/f2p2/3405                                                                                                 | gnl BL_ORD_ID 40541                                                                                                 | cb3941_c38/f1p1/3548    |     |      |      |      |     |      |      |      |
| isoform=cb3941_c21;full_length_coverage=2;non_full_length_coverage=2;isoform_length=3405;expected_accuracy=0.998     | isoform=cb3941_c38;full_length_coverage=1;non_full_length_coverage=1;isoform_length=3548;expected_accuracy=0.997    |                         | 147 | 3342 | 1    | 147  | 354 | 3548 | 52   | 198  |
| cb8564_c16897/f1p0/3118                                                                                              | gnl BL_ORD_ID 11821                                                                                                 | cb8564_c15227/f1p0/3770 |     |      |      |      |     |      |      |      |
| isoform=cb8564_c16897;full_length_coverage=1;non_full_length_coverage=0;isoform_length=3118;expected_accuracy=0.998  | isoform=cb8564_c15227;full_length_coverage=1;non_full_length_coverage=0;isoform_length=3770;expected_accuracy=0.999 |                         | 1   | 1584 | 1579 | 3118 | 40  | 1623 | 2228 | 3765 |

|                                                                                                                                          |                                                                                                                                                                                          |      |      |      |      |      |      |      |      |
|------------------------------------------------------------------------------------------------------------------------------------------|------------------------------------------------------------------------------------------------------------------------------------------------------------------------------------------|------|------|------|------|------|------|------|------|
| cb1088_c5/f1p0/3109<br>isoform=cb1088_c5;full_length_coverage=1;non_full_length_coverage=0;isoform_length=3109;expected_accuracy=0.995   | gnl BL_ORD_ID 47337 cb1088_c7/f1p0/3209                                                                                                                                                  | 1    | 2686 | 2685 | 3109 | 1    | 2666 | 2766 | 3190 |
| cb18456_c6530/f1p0/1200                                                                                                                  | gnl BL_ORD_ID 67485 cb18456_c3994/f1p0/1791                                                                                                                                              | 260  | 1166 | 3    | 259  | 795  | 1700 | 8    | 264  |
| cb2737_c63/f1p2/2799<br>isoform=cb2737_c63;full_length_coverage=1;non_full_length_coverage=2;isoform_length=2799;expected_accuracy=0.994 | gnl BL_ORD_ID 36735                      cb2737_c13/f1p0/3105<br>isoform=cb2737_c13;full_length_coverage=1;non_full_length_coverage=0;isoform_length=3105;expected_accuracy=0.995        | 101  | 1514 | 1512 | 2798 | 265  | 1676 | 1808 | 3103 |
| cb8564_c45609/f1p0/3991                                                                                                                  | gnl BL_ORD_ID 15996                      cb8564_c66839/f6p1/4041<br>isoform=cb8564_c66839;full_length_coverage=6;non_full_length_coverage=1;isoform_length=4041;expected_accuracy=1.000  | 260  | 3705 | 1    | 260  | 456  | 3901 | 1    | 261  |
| cb748_c24/f1p0/3517                                                                                                                      | gnl BL_ORD_ID 6979                      cb748_c5/f2p0/3050<br>isoform=cb748_c5;full_length_coverage=2;non_full_length_coverage=0;isoform_length=3050;expected_accuracy=1.000             | 12   | 2626 | 2626 | 2936 | 1    | 2614 | 2504 | 2836 |
| cb8564_c117152/f1p0/2542                                                                                                                 | gnl BL_ORD_ID 9561                      cb8564_c109796/f2p1/3040<br>isoform=cb8564_c109796;full_length_coverage=2;non_full_length_coverage=1;isoform_length=3040;expected_accuracy=1.000 | 1057 | 2470 | 1    | 1058 | 1627 | 3040 | 3    | 1059 |
| cb1666_c13/f1p0/1804<br>isoform=cb1666_c13;full_length_coverage=1;non_full_length_coverage=0;isoform_length=1804;expected_accuracy=0.991 | gnl BL_ORD_ID 33315                      cb1666_c5/f1p3/2503<br>isoform=cb1666_c5;full_length_coverage=1;non_full_length_coverage=3;isoform_length=2503;expected_accuracy=0.995          | 1    | 1664 | 1661 | 1804 | 560  | 2225 | 2337 | 2481 |

|                                                                                                                                                |                                                                                                                                                                      |      |      |      |      |      |      |      |      |
|------------------------------------------------------------------------------------------------------------------------------------------------|----------------------------------------------------------------------------------------------------------------------------------------------------------------------|------|------|------|------|------|------|------|------|
| cb8564_c35314/f1p0/2682<br>isoform=cb8564_c35314;full_length_coverage=1;non_full_length_coverage=0;isoform_length=2682;expected_accuracy=0.994 | gnl BL_ORD_ID 56381 cb8564_c75626/f1p2/3199                                                                                                                          | 1    | 2132 | 2130 | 2682 | 1    | 2116 | 2611 | 3158 |
| cb7521_c46/f1p0/2168                                                                                                                           | gnl BL_ORD_ID 51306 cb7521_c34/f1p0/2816                                                                                                                             | 1    | 1630 | 1626 | 2041 | 225  | 1854 | 2055 | 2470 |
| cb8564_c10249/f3p1/3015<br>isoform=cb8564_c10249;full_length_coverage=3;non_full_length_coverage=1;isoform_length=3015;expected_accuracy=0.995 | gnl BL_ORD_ID 55130 cb8564_c25074/f1p1/3102                                                                                                                          | 1    | 2261 | 2260 | 2935 | 22   | 2286 | 2388 | 3063 |
| cb4698_c19/f1p1/3082                                                                                                                           | gnl BL_ORD_ID 42963 cb4698_c11/f1p0/3141<br>isoform=cb4698_c11;full_length_coverage=1;non_full_length_coverage=0;isoform_length=3141;expected_accuracy=1.000         | 1251 | 2968 | 1    | 1251 | 1427 | 3141 | 26   | 1272 |
| cb8564_c43779/f1p0/3021<br>isoform=cb8564_c43779;full_length_coverage=1;non_full_length_coverage=0;isoform_length=3021;expected_accuracy=0.993 | gnl BL_ORD_ID 15193 cb8564_c42308/f1p5/3192<br>isoform=cb8564_c42308;full_length_coverage=1;non_full_length_coverage=5;isoform_length=3192;expected_accuracy=0.995   | 1    | 2344 | 2345 | 3018 | 5    | 2363 | 2519 | 3191 |
| cb8564_c46939/f1p1/2926                                                                                                                        | gnl BL_ORD_ID 55243 cb8564_c36242/f1p0/3335                                                                                                                          | 1    | 2134 | 2130 | 2870 | 1    | 2146 | 2251 | 2992 |
| cb14792_c2/f1p0/1864<br>isoform=cb14792_c2;full_length_coverage=1;non_full_length_coverage=0;isoform_length=1864;expected_accuracy=0.995       | gnl BL_ORD_ID 11547 cb8564_c147115/f6p1/2217<br>isoform=cb8564_c147115;full_length_coverage=6;non_full_length_coverage=1;isoform_length=2217;expected_accuracy=1.000 | 1    | 1524 | 1519 | 1864 | 138  | 1661 | 1872 | 2217 |
| cb3309_c2/f2p0/2095<br>isoform=cb3309_c2;full_length_coverage=2;non_full_length_coverage=0;isoform_length=2095;expected_accuracy=0.995         | gnl BL_ORD_ID 70307 cb3309_c10/f1p1/3166                                                                                                                             | 162  | 2056 | 1    | 164  | 1272 | 3166 | 34   | 197  |



|                                                                                                                      |                                                                                                                  |                          |     |      |      |      |      |      |      |      |
|----------------------------------------------------------------------------------------------------------------------|------------------------------------------------------------------------------------------------------------------|--------------------------|-----|------|------|------|------|------|------|------|
| ngth_coverage=0;isoform_length=2095;expected_accuracy=1.000                                                          |                                                                                                                  |                          |     |      |      |      |      |      |      |      |
| cb2737_c9/f2p0/2910                                                                                                  | gnl BL_ORD_ID 38129                                                                                              | cb2737_c25/f1p0/3198     |     |      |      |      |      |      |      |      |
| isoform=cb2737_c9;full_length_coverage=2;non_full_length_coverage=0;isoform_length=2910;expected_accuracy=0.993      | isoform=cb2737_c25;full_length_coverage=1;non_full_length_coverage=0;isoform_length=3198;expected_accuracy=0.997 |                          | 210 | 2868 | 2    | 210  | 537  | 3198 | 57   | 266  |
| cb8564_c47011/f1p0/3100                                                                                              | gnl BL_ORD_ID 57017                                                                                              | cb8564_c80370/f1p0/3493  | 127 | 2306 | 2301 | 2934 | 3085 | 907  | 669  | 36   |
| cb3752_c1/f2p0/1494                                                                                                  | gnl BL_ORD_ID 40664                                                                                              | cb3752_c7/f1p0/3475      |     |      |      |      |      |      |      |      |
| isoform=cb3752_c1;full_length_coverage=2;non_full_length_coverage=0;isoform_length=1494;expected_accuracy=1.000      | isoform=cb3752_c7;full_length_coverage=1;non_full_length_coverage=0;isoform_length=3475;expected_accuracy=0.999  |                          | 465 | 1494 | 5    | 466  | 2382 | 3416 | 1    | 464  |
| cb6221_c19/f1p0/1943                                                                                                 | gnl BL_ORD_ID 4878                                                                                               | cb6221_c8/f1p3/4003      |     |      |      |      |      |      |      |      |
|                                                                                                                      | isoform=cb6221_c8;full_length_coverage=1;non_full_length_coverage=3;isoform_length=4003;expected_accuracy=0.995  |                          | 247 | 1873 | 75   | 247  | 885  | 2517 | 1    | 174  |
| cb2737_c40/f1p0/2830                                                                                                 | gnl BL_ORD_ID 68777                                                                                              | cb2737_c19/f1p0/3583     | 1   | 1397 | 1395 | 2616 | 808  | 2205 | 2337 | 3558 |
| cb7495_c2/f2p1/2150                                                                                                  | gnl BL_ORD_ID 6886                                                                                               | cb7495_c3/f1p5/2591      |     |      |      |      |      |      |      |      |
| isoform=cb7495_c2;full_length_coverage=2;non_full_length_coverage=1;isoform_length=2150;expected_accuracy=1.000      | isoform=cb7495_c3;full_length_coverage=1;non_full_length_coverage=5;isoform_length=2591;expected_accuracy=0.999  |                          | 133 | 2150 | 1    | 138  | 267  | 2284 | 12   | 149  |
| cb8564_c120694/f1p0/2801                                                                                             | gnl BL_ORD_ID 55737                                                                                              | cb8564_c5271/f1p0/3205   | 260 | 2801 | 2    | 260  | 658  | 3194 | 1    | 259  |
| isoform=cb8564_c120694;full_length_coverage=1;non_full_length_coverage=0;isoform_length=2801;expected_accuracy=0.997 |                                                                                                                  |                          |     |      |      |      |      |      |      |      |
| cb8564_c183526/f1p0/2169                                                                                             | gnl BL_ORD_ID 12829                                                                                              | cb8564_c161406/f2p1/2330 | 1   | 1850 | 1850 | 2168 | 2    | 188  | 2003 | 233  |



|                                                                                                                      |                                                                                                                                                                         |     |      |      |      |      |      |      |      |
|----------------------------------------------------------------------------------------------------------------------|-------------------------------------------------------------------------------------------------------------------------------------------------------------------------|-----|------|------|------|------|------|------|------|
| isoform=cb8564_c183526;full_length_coverage=1;non_full_length_coverage=0;isoform_length=2169;expected_accuracy=0.998 | isoform=cb8564_c161406;full_length_coverage=2;non_full_length_coverage=1;isoform_length=2330;expected_accuracy=0.997                                                    |     |      |      |      |      | 0    | 0    |      |
| cb8564_c4643/f1p1/2554                                                                                               | gnl BL_ORD_ID 14567      cb8564_c4647/f1p2/2774<br>isoform=cb8564_c4647;full_length_coverage=1;non_full_length_coverage=2;isoform_length=2774;expected_accuracy=0.992   | 1   | 1705 | 1700 | 2552 | 33   | 1756 | 1890 | 2764 |
| cb8564_c52952/f1p0/3129                                                                                              | gnl BL_ORD_ID 18852      cb8564_c84488/f1p0/3408<br>isoform=cb8564_c84488;full_length_coverage=1;non_full_length_coverage=0;isoform_length=3408;expected_accuracy=0.996 | 230 | 2848 | 22   | 230  | 790  | 3408 | 14   | 217  |
| cb1487_c5/f1p0/1318                                                                                                  | gnl BL_ORD_ID 29668      cb1487_c1/f1p0/3827<br>isoform=cb1487_c1;full_length_coverage=1;non_full_length_coverage=0;isoform_length=3827;expected_accuracy=0.996         | 157 | 1318 | 50   | 159  | 2596 | 3761 | 1    | 110  |
| cb322_c15/f1p0/3487                                                                                                  | gnl BL_ORD_ID 40333      cb322_c18/f1p0/4294<br>isoform=cb322_c18;full_length_coverage=1;non_full_length_coverage=0;isoform_length=4294;expected_accuracy=0.994         | 1   | 2729 | 2728 | 3487 | 5    | 2750 | 2896 | 3657 |
| cb8564_c16090/f1p6/2546                                                                                              | gnl BL_ORD_ID 14058      cb8564_c23936/f1p0/3016<br>isoform=cb8564_c23936;full_length_coverage=1;non_full_length_coverage=0;isoform_length=3016;expected_accuracy=0.995 | 1   | 1712 | 1710 | 2482 | 4    | 1716 | 2143 | 2914 |
| cb5057_c18/f1p0/1420                                                                                                 | gnl BL_ORD_ID 43289      cb5057_c10/f1p1/1806<br>isoform=cb5057_c10;full_length_coverage=1;non_full_length_coverage=1;isoform_length=1806;expected_accuracy=0.995       | 1   | 1020 | 1016 | 1420 | 3    | 1028 | 1192 | 1602 |

|                                                                                                                      |                                                                                                                      |      |      |      |      |      |          |      |          |  |
|----------------------------------------------------------------------------------------------------------------------|----------------------------------------------------------------------------------------------------------------------|------|------|------|------|------|----------|------|----------|--|
| racy=0.992                                                                                                           | acy=1.000                                                                                                            |      |      |      |      |      |          |      |          |  |
| cb3324_c9/f1p0/5886                                                                                                  | gnl BL_ORD_ID 71091 cb3324_c7/f1p2/6368                                                                              | 2360 | 5594 | 1    | 2362 | 3083 | 631<br>7 | 1    | 235<br>6 |  |
| cb2789_c3/f2p0/2507                                                                                                  |                                                                                                                      |      |      |      |      |      |          |      |          |  |
| isoform=cb2789_c3;full_length_coverage=2;non_full_length_coverage=0;isoform_length=2507;expected_accuracy=1.000      | gnl BL_ORD_ID 68853 cb2789_c11/f1p0/2870                                                                             | 284  | 2507 | 6    | 286  | 442  | 266<br>6 | 1    | 279      |  |
| cb2825_c1/f4p1/2045                                                                                                  | gnl BL_ORD_ID 38761 cb2825_c4/f1p1/3802                                                                              |      |      |      |      |      |          |      |          |  |
| isoform=cb2825_c1;full_length_coverage=4;non_full_length_coverage=1;isoform_length=2045;expected_accuracy=1.000      | isoform=cb2825_c4;full_length_coverage=1;non_full_length_coverage=1;isoform_length=3802;expected_accuracy=0.996      | 137  | 2045 | 1    | 139  | 1873 | 378<br>8 | 20   | 156      |  |
| cb402_c23/f1p1/2136                                                                                                  | gnl BL_ORD_ID 39494 cb402_c24/f1p1/3130                                                                              |      |      |      |      |      |          |      |          |  |
| isoform=cb402_c23;full_length_coverage=1;non_full_length_coverage=1;isoform_length=2136;expected_accuracy=1.000      | isoform=cb402_c24;full_length_coverage=1;non_full_length_coverage=1;isoform_length=3130;expected_accuracy=0.993      | 116  | 2080 | 1    | 117  | 1167 | 313<br>0 | 9    | 125      |  |
| cb8564_c186356/f1p0/2744                                                                                             |                                                                                                                      |      |      |      |      |      |          |      |          |  |
| isoform=cb8564_c186356;full_length_coverage=1;non_full_length_coverage=0;isoform_length=2744;expected_accuracy=0.998 | gnl BL_ORD_ID 55574 cb8564_c45699/f1p0/3005                                                                          | 1393 | 2744 | 1    | 1396 | 1498 | 284<br>5 | 1    | 137<br>8 |  |
| cb8564_c82133/f2p0/2339                                                                                              | gnl BL_ORD_ID 10504 cb8564_c112560/f1p0/2652                                                                         |      |      |      |      |      |          |      |          |  |
| isoform=cb8564_c82133;full_length_coverage=2;non_full_length_coverage=0;isoform_length=2339;expected_accuracy=1.000  | isoform=cb8564_c112560;full_length_coverage=1;non_full_length_coverage=0;isoform_length=2652;expected_accuracy=0.996 | 1    | 1965 | 1966 | 2318 | 79   | 204<br>0 | 2298 | 265<br>0 |  |
| cb396_c48/f1p0/2172                                                                                                  | gnl BL_ORD_ID 39335 cb396_c41/f1p0/2356                                                                              |      |      |      |      |      |          |      |          |  |
|                                                                                                                      | isoform=cb396_c41;full_length_coverage=1;non_full_length_coverage=0;isoform_length=2356;expected_accuracy=0.996      | 238  | 2102 | 55   | 238  | 495  | 235<br>6 | 63   | 246      |  |

|                                                                                                                                                  |                                                                                                                                                                           |     |      |      |      |     |      |      |      |
|--------------------------------------------------------------------------------------------------------------------------------------------------|---------------------------------------------------------------------------------------------------------------------------------------------------------------------------|-----|------|------|------|-----|------|------|------|
| cb713_c3/flp2/3872<br>isoform=cb713_c3;full_length_coverage=1;non_full_length_coverage=2;isoform_length=3872;expected_accuracy=0.999             | cy=0.991<br>gnl BL_ORD_ID 3459      cb713_c6/flp2/3965<br>isoform=cb713_c6;full_length_coverage=1;non_full_length_coverage=2;isoform_length=3965;expected_accuracy=0.995  | 13  | 2058 | 2057 | 3772 | 34  | 2084 | 2249 | 3965 |
| cb8564_c4705/flp1/1899                                                                                                                           | gnl BL_ORD_ID 55051      cb8564_c4700/flp0/4682                                                                                                                           | 1   | 1078 | 1077 | 1764 | 2   | 1079 | 3604 | 4291 |
| cb18788_c0/flp0/5832                                                                                                                             | gnl BL_ORD_ID 67932      cb18657_c2/flp0/5718                                                                                                                             | 46  | 5028 | 5026 | 5663 | 9   | 4991 | 5099 | 5737 |
| cb8564_c127660/flp1/2274<br>isoform=cb8564_c127660;full_length_coverage=1;non_full_length_coverage=1;isoform_length=2274;expected_accuracy=1.000 | gnl BL_ORD_ID 57869      cb8564_c82906/flp1/2331                                                                                                                          | 387 | 2274 | 98   | 386  | 451 | 2338 | 1    | 289  |
| cb8564_c185920/flp0/2777<br>isoform=cb8564_c185920;full_length_coverage=1;non_full_length_coverage=0;isoform_length=2777;expected_accuracy=0.996 | gnl BL_ORD_ID 13512      cb8564_c186209/flp0/2931<br>isoform=cb8564_c186209;full_length_coverage=1;non_full_length_coverage=0;isoform_length=2931;expected_accuracy=0.996 | 174 | 2774 | 1    | 177  | 351 | 2931 | 15   | 192  |
| cb18456_c3841/flp0/1111                                                                                                                          | gnl BL_ORD_ID 35957      cb18456_c3753/flp2/1269<br>isoform=cb18456_c3753;full_length_coverage=1;non_full_length_coverage=2;isoform_length=1269;expected_accuracy=0.997   | 7   | 588  | 585  | 1050 | 2   | 605  | 737  | 1215 |
| cb8564_c3829/flp0/2015<br>isoform=cb8564_c3829;full_length_coverage=1;non_full_length_coverage=0;isoform_length=2015;expected_accuracy=0.997     | gnl BL_ORD_ID 14789      cb8564_c3830/flp1/2146<br>isoform=cb8564_c3830;full_length_coverage=1;non_full_length_coverage=1;isoform_length=2146;expected_accuracy=0.997     | 370 | 2005 | 38   | 372  | 439 | 2076 | 1    | 330  |
| cb8564_c138545/f4p0/2007                                                                                                                         | gnl BL_ORD_ID 9253      cb8564_c121717/flp0/2419                                                                                                                          | 1   | 1028 | 1026 | 1926 | 1   | 102  | 1519 | 241  |

|                                                                                                                      |                                                                                                                      |     |      |      |      |      |          |      |          |
|----------------------------------------------------------------------------------------------------------------------|----------------------------------------------------------------------------------------------------------------------|-----|------|------|------|------|----------|------|----------|
| isoform=cb8564_c138545;full_length_coverage=4;non_full_length_coverage=0;isoform_length=2007;expected_accuracy=1.000 | isoform=cb8564_c121717;full_length_coverage=1;non_full_length_coverage=0;isoform_length=2419;expected_accuracy=0.999 |     |      |      |      |      |          | 9    | 9        |
| cb8564_c91729/f1p1/2879                                                                                              | gnl BL_ORD_ID 52847 cb8564_c101047/f2p0/2937                                                                         | 362 | 2790 | 77   | 357  | 495  | 292<br>4 | 369  | 649      |
| cb8564_c43779/f1p0/3021                                                                                              | gnl BL_ORD_ID 15169 cb8564_c40218/f1p0/3146                                                                          |     |      |      |      |      |          |      |          |
| isoform=cb8564_c43779;full_length_coverage=1;non_full_length_coverage=0;isoform_length=3021;expected_accuracy=0.993  | isoform=cb8564_c40218;full_length_coverage=1;non_full_length_coverage=0;isoform_length=3146;expected_accuracy=0.993  | 1   | 2344 | 2343 | 3017 | 4    | 233<br>0 | 2482 | 314<br>6 |
| cb8564_c127456/f1p1/2149                                                                                             | gnl BL_ORD_ID 52413 cb8564_c122074/f1p0/2702                                                                         | 13  | 1731 | 1731 | 2108 | 27   | 174<br>5 | 1947 | 232<br>4 |
| cb7504_c3/f1p0/1972                                                                                                  | gnl BL_ORD_ID 7873 cb7504_c11/f15p0/2330                                                                             |     |      |      |      |      |          |      |          |
| isoform=cb7504_c3;full_length_coverage=1;non_full_length_coverage=0;isoform_length=1972;expected_accuracy=0.995      | isoform=cb7504_c11;full_length_coverage=15;non_full_length_coverage=0;isoform_length=2330;expected_accuracy=1.000    | 1   | 1003 | 1005 | 1972 | 63   | 107<br>1 | 1357 | 232<br>6 |
| cb10934_c7/f2p0/1121                                                                                                 | gnl BL_ORD_ID 295 cb10934_c3/f1p0/2605                                                                               |     |      |      |      |      |          |      |          |
| isoform=cb10934_c7;full_length_coverage=2;non_full_length_coverage=0;isoform_length=1121;expected_accuracy=1.000     | isoform=cb10934_c3;full_length_coverage=1;non_full_length_coverage=0;isoform_length=2605;expected_accuracy=0.996     | 130 | 1105 | 3    | 134  | 1626 | 260<br>5 | 2    | 131      |
| cb1540_c27/f1p0/3741                                                                                                 | gnl BL_ORD_ID 28148 cb1540_c3/f2p0/3962                                                                              |     |      |      |      |      |          |      |          |
|                                                                                                                      | isoform=cb1540_c3;full_length_coverage=2;non_full_length_coverage=0;isoform_length=3962;expected_accuracy=0.996      | 304 | 3535 | 1    | 303  | 665  | 389<br>4 | 139  | 442      |
| cb8564_c86089/f1p2/3472                                                                                              | gnl BL_ORD_ID 16434 cb8564_c69071/f2p1/3650                                                                          |     |      |      |      |      |          |      |          |
|                                                                                                                      | isoform=cb8564_c69071;full_length_coverage=2;non_full_length_coverage=1;isoform_length=3650;expected_ac              | 173 | 3436 | 1    | 177  | 391  | 365<br>0 | 1    | 179      |

|                          |                                                                                                                                                                                         |      |      |      |      |      |      |      |      |
|--------------------------|-----------------------------------------------------------------------------------------------------------------------------------------------------------------------------------------|------|------|------|------|------|------|------|------|
| cb8564_c110398/f1p2/2012 | curacy=0.996<br>gnl BL_ORD_ID 16544      cb8564_c75063/f1p1/2293<br>isoform=cb8564_c75063;full_length_coverage=1;non_full_length_coverage=1;isoform_length=2293;expected_accuracy=0.999 | 1    | 1401 | 1399 | 1963 | 1    | 1401 | 1703 | 2265 |
| cb8564_c39136/f1p0/3036  | isoform=cb8564_c39136;full_length_coverage=1;non_full_length_coverage=0;isoform_length=3036;expected_accuracy=0.998<br>gnl BL_ORD_ID 55437      cb8564_c41690/f1p1/3409                 | 1    | 2089 | 2085 | 3036 | 1    | 2100 | 2227 | 3180 |
| cb1343_c27/f1p0/3871     | gnl BL_ORD_ID 61275      cb1343_c6/f1p0/4367                                                                                                                                            | 2    | 3229 | 3228 | 3816 | 14   | 3242 | 3408 | 3996 |
| cb14634_c52/f1p1/4305    | gnl BL_ORD_ID 30730      cb14634_c35/f1p0/4383<br>isoform=cb14634_c35;full_length_coverage=1;non_full_length_coverage=0;isoform_length=4383;expected_accuracy=0.995                     | 1    | 2658 | 2653 | 4282 | 18   | 2641 | 2759 | 4383 |
| cb8564_c39624/f1p1/3482  | gnl BL_ORD_ID 14669      cb8564_c44765/f1p1/4352<br>isoform=cb8564_c44765;full_length_coverage=1;non_full_length_coverage=1;isoform_length=4352;expected_accuracy=0.995                 | 1532 | 3482 | 13   | 1534 | 2375 | 4339 | 1    | 1524 |
| cb5421_c9/f1p0/1725      | gnl BL_ORD_ID 44652      cb5421_c4/f1p0/1919<br>isoform=cb5421_c4;full_length_coverage=1;non_full_length_coverage=0;isoform_length=1919;expected_accuracy=0.997                         | 178  | 1618 | 56   | 179  | 258  | 1710 | 1    | 124  |
| cb8564_c14767/f1p3/2856  | gnl BL_ORD_ID 17556      cb8564_c9820/f2p0/3032<br>isoform=cb8564_c9820;full_length_coverage=2;non_full_length_coverage=0;isoform_length=3032;expected_ac                               | 1    | 1702 | 1700 | 2601 | 1    | 1704 | 2131 | 3032 |

|                          |                                                                                                                                                                                         |    |      |      |      |     |      |      |      |
|--------------------------|-----------------------------------------------------------------------------------------------------------------------------------------------------------------------------------------|----|------|------|------|-----|------|------|------|
| cb8564_c145793/f4p0/3585 | curacy=0.995<br>gnl BL_ORD_ID 16157      cb8564_c77802/f1p0/3651<br>isoform=cb8564_c77802;full_length_coverage=1;non_full_length_coverage=0;isoform_length=3651;expected_accuracy=0.996 | 17 | 2715 | 2716 | 3563 | 1   | 2693 | 2810 | 3651 |
| cb8564_c38035/f1p0/2770  | gnl BL_ORD_ID 12938      cb8564_c181163/f1p1/2936<br>isoform=cb8564_c181163;full_length_coverage=1;non_full_length_coverage=1;isoform_length=2936;expected_accuracy=0.993               | 1  | 2035 | 2033 | 2756 | 5   | 2028 | 2217 | 2933 |
| cb6935_c4/f1p0/1785      | gnl BL_ORD_ID 3711      cb6935_c0/f1p0/2736<br>isoform=cb6935_c0;full_length_coverage=1;non_full_length_coverage=0;isoform_length=2736;expected_accuracy=0.993                          | 1  | 1017 | 1015 | 1797 | 1   | 1027 | 1951 | 2733 |
| cb2737_c40/f1p0/2830     | gnl BL_ORD_ID 36733      cb2737_c14/f1p0/2854<br>isoform=cb2737_c14;full_length_coverage=1;non_full_length_coverage=0;isoform_length=2854;expected_accuracy=0.996                       | 1  | 1397 | 1395 | 2600 | 120 | 1518 | 1650 | 2854 |
| cb5304_c17/f1p1/2678     | gnl BL_ORD_ID 73759      cb5304_c5/f1p0/2736<br>isoform=cb5304_c5;full_length_coverage=1;non_full_length_coverage=1;isoform_length=2678;expected_accuracy=0.998                         | 1  | 1907 | 1906 | 2611 | 30  | 1937 | 2052 | 2762 |
| cb8564_c118180/f1p0/2445 | gnl BL_ORD_ID 13236      cb8564_c20610/f2p1/2663<br>isoform=cb8564_c20610;full_length_coverage=2;non_full_length_coverage=1;isoform_length=2663;expected_accuracy=1.000                 | 1  | 1664 | 1669 | 2263 | 3   | 1666 | 1997 | 2590 |
| cb8564_c38035/f1p0/2770  | gnl BL_ORD_ID 55317      cb8564_c38251/f1p0/3243                                                                                                                                        | 1  | 2035 | 2033 | 2756 | 1   | 205  | 2247 | 297  |



|                          |                                                                                                                                                                                       |      |      |      |      |      |      |      |      |
|--------------------------|---------------------------------------------------------------------------------------------------------------------------------------------------------------------------------------|------|------|------|------|------|------|------|------|
| cb8564_c116509/f1p0/3009 | cy=0.999<br>gnl BL_ORD_ID 12106      cb8564_c146659/f3p0/3534<br>isoform=cb8564_c146659;full_length_coverage=3;non_full_length_coverage=0;isoform_length=3534;expected_accuracy=0.998 | 1    | 2015 | 2015 | 2985 | 75   | 2095 | 2551 | 3529 |
| cb8564_c91149/f1p5/2619  | gnl BL_ORD_ID 17556      cb8564_c9820/f2p0/3032<br>isoform=cb8564_c91149;full_length_coverage=1;non_full_length_coverage=5;isoform_length=2619;expected_accuracy=0.997                | 1    | 1710 | 1708 | 2614 | 1    | 1704 | 2131 | 3018 |
| cb12389_c2/f1p0/1783     | gnl BL_ORD_ID 20474      cb9943_c4/f1p1/1910<br>isoform=cb12389_c2;full_length_coverage=1;non_full_length_coverage=0;isoform_length=1783;expected_accuracy=0.991                      | 1    | 1251 | 1248 | 1783 | 10   | 1265 | 1370 | 1904 |
| cb3008_c5/f1p1/1912      | gnl BL_ORD_ID 36622      cb3008_c1/f2p2/3740<br>isoform=cb3008_c5;full_length_coverage=1;non_full_length_coverage=1;isoform_length=1912;expected_accuracy=0.993                       | 10   | 1677 | 1678 | 1912 | 9    | 1676 | 2459 | 2692 |
| cb5637_c11/f7p0/1025     | gnl BL_ORD_ID 46919      cb5637_c7/f1p1/1131<br>isoform=cb5637_c11;full_length_coverage=7;non_full_length_coverage=0;isoform_length=1025;expected_accuracy=1.000                      | 2    | 603  | 600  | 994  | 1    | 603  | 737  | 1131 |
| cb8564_c51169/f1p3/3251  | gnl BL_ORD_ID 58096      cb8564_c88702/f1p0/3616<br>isoform=cb8564_c51169;full_length_coverage=1;non_full_length_coverage=3;isoform_length=3251;expected_accuracy=0.993               | 130  | 3230 | 1    | 130  | 309  | 3413 | 27   | 157  |
| cb8564_c75076/f1p0/3860  | gnl BL_ORD_ID 11480      cb8564_c147875/f1p2/4050                                                                                                                                     | 1611 | 3857 | 1    | 1616 | 1826 | 404  | 26   | 164  |



|                                                                                                                                                 |                                                                                                                                                                    |     |      |      |      |      |      |      |      |  |
|-------------------------------------------------------------------------------------------------------------------------------------------------|--------------------------------------------------------------------------------------------------------------------------------------------------------------------|-----|------|------|------|------|------|------|------|--|
| isoform=cb8564_c75076;full_length_coverage=1;non_full_length_coverage=0;isoform_length=3860;expected_accuracy=0.996<br>cb8564_c126557/f1p0/3867 | isoform=cb8564_c147875;full_length_coverage=1;non_full_length_coverage=2;isoform_length=4050;expected_accuracy=0.992                                               |     |      |      |      |      |      | 8    | 2    |  |
| isoform=cb8564_c126557;full_length_coverage=1;non_full_length_coverage=0;isoform_length=3867;expected_accuracy=1.000<br>cb6221_c19/f1p0/1943    | gnl BL_ORD_ID 65215 cb16334_c2/f1p0/5402                                                                                                                           | 1   | 3427 | 3427 | 3867 | 90   | 3515 | 3720 | 4160 |  |
| cb8564_c181853/f1p0/2119                                                                                                                        | gnl BL_ORD_ID 4880 cb6221_c4/f3p3/2906<br>isoform=cb6221_c4;full_length_coverage=3;non_full_length_coverage=3;isoform_length=2906;expected_accuracy=1.000          | 247 | 1873 | 63   | 247  | 900  | 2530 | 1    | 187  |  |
| isoform=cb8564_c181853;full_length_coverage=1;non_full_length_coverage=0;isoform_length=2119;expected_accuracy=0.997<br>cb9143_c30/f2p0/2817    | gnl BL_ORD_ID 15153 cb8564_c36883/f1p0/3072<br>isoform=cb8564_c36883;full_length_coverage=1;non_full_length_coverage=0;isoform_length=3072;expected_accuracy=0.996 | 1   | 1339 | 1334 | 2119 | 1    | 1341 | 2169 | 2954 |  |
| isoform=cb9143_c30;full_length_coverage=2;non_full_length_coverage=0;isoform_length=2817;expected_accuracy=0.996                                | gnl BL_ORD_ID 20007 cb9143_c59/f2p6/2981<br>isoform=cb9143_c59;full_length_coverage=2;non_full_length_coverage=6;isoform_length=2981;expected_accuracy=0.996       | 199 | 2815 | 13   | 203  | 356  | 2979 | 23   | 222  |  |
| cb8564_c14882/f1p0/2156                                                                                                                         | gnl BL_ORD_ID 52763 cb8564_c13243/f1p0/4432                                                                                                                        | 237 | 2080 | 47   | 238  | 2440 | 4283 | 1    | 191  |  |
| cb8564_c17357/f1p1/3002                                                                                                                         | gnl BL_ORD_ID 13079 cb8564_c18068/f1p2/3340<br>isoform=cb8564_c18068;full_length_coverage=1;non_full_length_coverage=2;isoform_length=3340;expected_accuracy=0.995 | 1   | 1755 | 1752 | 3002 | 6    | 1765 | 2100 | 3335 |  |
| cb10696_c1/f2p0/1444                                                                                                                            | gnl BL_ORD_ID 1517 cb10696_c0/f4p2/1611                                                                                                                            | 132 | 1444 | 1    | 132  | 264  | 157  | 1    | 132  |  |

|                                                                                                                  |                                                                                                                                                                                           |      |      |      |      |      |      |      |      |   |  |  |
|------------------------------------------------------------------------------------------------------------------|-------------------------------------------------------------------------------------------------------------------------------------------------------------------------------------------|------|------|------|------|------|------|------|------|---|--|--|
| isoform=cb10696_c1;full_length_coverage=2;non_full_length_coverage=0;isoform_length=1444;expected_accuracy=1.000 | isoform=cb10696_c0;full_length_coverage=4;non_full_length_coverage=2;isoform_length=1611;expected_accuracy=0.997                                                                          |      |      |      |      |      |      |      |      | 6 |  |  |
| cb7395_c9/f1p0/2016                                                                                              | gnl BL_ORD_ID 7487                      cb7395_c3/f1p0/2630<br>isoform=cb7395_c3;full_length_coverage=1;non_full_length_coverage=0;isoform_length=2630;expected_accuracy=0.997            | 1    | 1363 | 1360 | 1814 | 75   | 1438 | 2176 | 2630 |   |  |  |
| cb8564_c3432/f1p0/2118                                                                                           | gnl BL_ORD_ID 53641   cb8564_c140752/f1p6/2343                                                                                                                                            | 619  | 2090 | 7    | 623  | 744  | 2215 | 12   | 628  |   |  |  |
| cb965_c21/f1p0/3360                                                                                              | gnl BL_ORD_ID 20095                      cb965_c5/f2p7/4283<br>isoform=cb965_c5;full_length_coverage=2;non_full_length_coverage=7;isoform_length=4283;expected_accuracy=1.000             | 1170 | 3298 | 1    | 1171 | 2067 | 4186 | 783  | 1952 |   |  |  |
| cb4528_c40/f4p0/1916                                                                                             | gnl BL_ORD_ID 44099                      cb4528_c13/f1p0/3055<br>isoform=cb4528_c13;full_length_coverage=1;non_full_length_coverage=0;isoform_length=3055;expected_accuracy=0.994         | 1    | 1291 | 1290 | 1916 | 4    | 1295 | 2347 | 2972 |   |  |  |
| cb8564_c182592/f1p0/2600                                                                                         | gnl BL_ORD_ID 10296                      cb8564_c116976/f1p0/2943<br>isoform=cb8564_c116976;full_length_coverage=1;non_full_length_coverage=0;isoform_length=2943;expected_accuracy=0.997 | 1    | 1582 | 1583 | 2597 | 1    | 1584 | 1927 | 2941 |   |  |  |
| cb7611_c28/f5p0/2201                                                                                             | gnl BL_ORD_ID 7566                      cb7611_c18/f1p0/3224<br>isoform=cb7611_c18;full_length_coverage=1;non_full_length_coverage=0;isoform_length=3224;expected_accuracy=1.000          | 269  | 2175 | 29   | 271  | 1325 | 3224 | 1    | 243  |   |  |  |
| cb8564_c14344/f1p0/2533                                                                                          | gnl BL_ORD_ID 57123   cb8564_c84015/f1p0/3207                                                                                                                                             | 148  | 2513 | 1    | 151  | 472  | 283  | 3    | 153  |   |  |  |

|                                                                                                                     |                                                                                                                     |                         |      |      |      |      |      |      |      |      |
|---------------------------------------------------------------------------------------------------------------------|---------------------------------------------------------------------------------------------------------------------|-------------------------|------|------|------|------|------|------|------|------|
| isoform=cb8564_c14344;full_length_coverage=1;non_full_length_coverage=0;isoform_length=2533;expected_accuracy=0.993 |                                                                                                                     |                         |      |      |      |      |      |      |      | 8    |
| cb6307_c26/f1p0/2394                                                                                                | gnl BL_ORD_ID 5693                                                                                                  | cb6307_c0/f7p1/2712     |      |      |      |      |      |      |      |      |
| isoform=cb6307_c26;full_length_coverage=1;non_full_length_coverage=0;isoform_length=2394;expected_accuracy=0.996    | isoform=cb6307_c0;full_length_coverage=7;non_full_length_coverage=1;isoform_length=2712;expected_accuracy=1.000     |                         | 11   | 1856 | 1852 | 2394 | 17   | 1868 | 2169 | 2711 |
| cb7623_c27/f1p0/2082                                                                                                | gnl BL_ORD_ID 7074                                                                                                  | cb7623_c34/f2p0/2410    |      |      |      |      |      |      |      |      |
|                                                                                                                     | isoform=cb7623_c34;full_length_coverage=2;non_full_length_coverage=0;isoform_length=2410;expected_accuracy=0.994    |                         | 1    | 1243 | 1240 | 2074 | 3    | 1241 | 1434 | 2271 |
| cb3367_c13/f1p0/1942                                                                                                | gnl BL_ORD_ID 40686                                                                                                 | cb3367_c21/f1p0/3212    |      |      |      |      |      |      |      |      |
| isoform=cb3367_c13;full_length_coverage=1;non_full_length_coverage=0;isoform_length=1942;expected_accuracy=0.998    | isoform=cb3367_c21;full_length_coverage=1;non_full_length_coverage=0;isoform_length=3212;expected_accuracy=0.992    |                         | 124  | 1942 | 1    | 125  | 1351 | 3163 | 89   | 213  |
| cb5931_c10/f1p1/2616                                                                                                | gnl BL_ORD_ID 74667                                                                                                 | cb5931_c3/f1p0/2877     |      |      |      |      |      |      |      |      |
|                                                                                                                     |                                                                                                                     |                         | 2    | 2034 | 2030 | 2613 | 2    | 2034 | 2254 | 2837 |
| cb162_c1/f1p0/3584                                                                                                  | gnl BL_ORD_ID 63570                                                                                                 | cb162_c3/f1p0/4680      |      |      |      |      |      |      |      |      |
| isoform=cb162_c1;full_length_coverage=1;non_full_length_coverage=0;isoform_length=3584;expected_accuracy=0.994      |                                                                                                                     |                         | 1061 | 3584 | 1    | 1064 | 2217 | 4743 | 33   | 1099 |
| cb8564_c87721/f1p0/2168                                                                                             | gnl BL_ORD_ID 17354                                                                                                 | cb8564_c82150/f1p0/2905 |      |      |      |      |      |      |      |      |
| isoform=cb8564_c87721;full_length_coverage=1;non_full_length_coverage=0;isoform_length=2168;expected_accuracy=0.997 | isoform=cb8564_c82150;full_length_coverage=1;non_full_length_coverage=0;isoform_length=2905;expected_accuracy=0.994 |                         | 1    | 1811 | 1809 | 2103 | 46   | 1862 | 2611 | 2905 |
| cb8564_c122625/f1p0/2416                                                                                            | gnl BL_ORD_ID 10212                                                                                                 | cb8564_c10164/f1p0/2908 |      |      |      |      |      |      |      |      |
|                                                                                                                     |                                                                                                                     |                         | 262  | 2190 | 4    | 263  | 978  | 290  | 8    | 260  |

|                                                                                                                     |                                                                                                                     |     |      |      |      |      |      |      |      |  |  |
|---------------------------------------------------------------------------------------------------------------------|---------------------------------------------------------------------------------------------------------------------|-----|------|------|------|------|------|------|------|--|--|
|                                                                                                                     | isoform=cb8564_c10164;full_length_coverage=1;non_full_length_coverage=0;isoform_length=2908;expected_accuracy=0.996 |     |      |      |      |      |      |      | 8    |  |  |
| cb8564_c49562/f1p0/2838                                                                                             | gnl BL_ORD_ID 16681      cb8564_c54233/f1p1/3194                                                                    |     |      |      |      |      |      |      |      |  |  |
| isoform=cb8564_c49562;full_length_coverage=1;non_full_length_coverage=0;isoform_length=2838;expected_accuracy=0.995 | isoform=cb8564_c54233;full_length_coverage=1;non_full_length_coverage=1;isoform_length=3194;expected_accuracy=0.995 | 1   | 2331 | 2327 | 2836 | 3    | 2349 | 2681 | 3194 |  |  |
| cb2285_c14/f1p0/2217                                                                                                | gnl BL_ORD_ID 68411      cb2285_c6/f1p0/3984                                                                        | 1   | 1098 | 1097 | 1903 | 85   | 1178 | 3194 | 3999 |  |  |
| cb3485_c9/f1p0/2043                                                                                                 |                                                                                                                     |     |      |      |      |      |      |      |      |  |  |
| isoform=cb3485_c9;full_length_coverage=1;non_full_length_coverage=0;isoform_length=2043;expected_accuracy=0.993     | gnl BL_ORD_ID 71249      cb3485_c13/f1p0/2609                                                                       | 365 | 2035 | 4    | 365  | 870  | 2542 | 1    | 362  |  |  |
| cb8564_c44063/f1p0/2503                                                                                             |                                                                                                                     |     |      |      |      |      |      |      |      |  |  |
| isoform=cb8564_c44063;full_length_coverage=1;non_full_length_coverage=0;isoform_length=2503;expected_accuracy=0.999 | gnl BL_ORD_ID 55860      cb8564_c47209/f1p0/3227                                                                    | 397 | 2472 | 63   | 402  | 584  | 2657 | 100  | 439  |  |  |
| cb8564_c36056/f1p0/2652                                                                                             | gnl BL_ORD_ID 14585      cb8564_c36952/f1p0/3622                                                                    |     |      |      |      |      |      |      |      |  |  |
| isoform=cb8564_c36056;full_length_coverage=1;non_full_length_coverage=0;isoform_length=2652;expected_accuracy=0.999 | isoform=cb8564_c36952;full_length_coverage=1;non_full_length_coverage=0;isoform_length=3622;expected_accuracy=0.994 | 253 | 2652 | 1    | 251  | 1229 | 3622 | 69   | 323  |  |  |
| cb8564_c43119/f1p4/3194                                                                                             |                                                                                                                     |     |      |      |      |      |      |      |      |  |  |
| isoform=cb8564_c43119;full_length_coverage=1;non_full_length_coverage=4;isoform_length=3194;expected_accuracy=0.995 | gnl BL_ORD_ID 56041      cb8564_c53077/f1p2/3406                                                                    | 338 | 3157 | 4    | 338  | 452  | 3249 | 6    | 337  |  |  |
| cb4632_c9/f1p0/2253                                                                                                 | gnl BL_ORD_ID 72781      cb4632_c5/f1p0/2489                                                                        | 1   | 1837 | 1834 | 2216 | 26   | 186  | 2101 | 248  |  |  |

|                                                                                                                     |                                                                                                                     |                         |      |      |      |      |      |      |      |     |
|---------------------------------------------------------------------------------------------------------------------|---------------------------------------------------------------------------------------------------------------------|-------------------------|------|------|------|------|------|------|------|-----|
| isoform=cb4632_c9;full_length_coverage=1;non_full_length_coverage=0;isoform_length=2253;expected_accuracy=0.990     |                                                                                                                     |                         |      |      |      |      |      | 5    |      | 4   |
| cb9143_c99/f1p0/2956                                                                                                | gnl BL_ORD_ID 19764                                                                                                 | cb9143_c75/f1p0/4652    |      |      |      |      |      |      |      |     |
| isoform=cb9143_c99;full_length_coverage=1;non_full_length_coverage=0;isoform_length=2956;expected_accuracy=0.992    | isoform=cb9143_c75;full_length_coverage=1;non_full_length_coverage=0;isoform_length=4652;expected_accuracy=0.998    | 227                     | 2956 | 1    | 227  | 1867 | 459  | 0    | 1115 | 133 |
| cb3602_c1/f6p3/2221                                                                                                 | gnl BL_ORD_ID 70514                                                                                                 | cb3602_c15/f1p1/2585    |      |      |      |      |      |      |      |     |
| isoform=cb3602_c1;full_length_coverage=6;non_full_length_coverage=3;isoform_length=2221;expected_accuracy=1.000     | 1                                                                                                                   | 1453                    | 1451 | 2221 | 1    | 144  | 6    | 1683 | 245  | 3   |
| cb8564_c77080/f1p0/2613                                                                                             | gnl BL_ORD_ID 15632                                                                                                 | cb8564_c72151/f1p0/2999 |      |      |      |      |      |      |      |     |
| isoform=cb8564_c77080;full_length_coverage=1;non_full_length_coverage=0;isoform_length=2613;expected_accuracy=0.995 | isoform=cb8564_c72151;full_length_coverage=1;non_full_length_coverage=0;isoform_length=2999;expected_accuracy=1.000 | 1                       | 2048 | 2043 | 2601 | 47   | 208  | 7    | 2440 | 299 |
| cb5608_c19/f1p0/2420                                                                                                | gnl BL_ORD_ID 45094                                                                                                 | cb5608_c13/f2p0/2807    |      |      |      |      |      |      |      |     |
| isoform=cb5608_c19;full_length_coverage=1;non_full_length_coverage=0;isoform_length=2420;expected_accuracy=0.999    | isoform=cb5608_c13;full_length_coverage=2;non_full_length_coverage=0;isoform_length=2807;expected_accuracy=0.996    | 1                       | 1699 | 1694 | 2420 | 40   | 173  | 8    | 1942 | 266 |
| cb8037_c5/f1p0/1371                                                                                                 | gnl BL_ORD_ID 50836                                                                                                 | cb8037_c3/f1p0/1939     |      |      |      |      |      |      |      |     |
|                                                                                                                     | gnl BL_ORD_ID 15994                                                                                                 | cb8564_c54019/f1p1/2940 |      |      |      |      |      |      |      |     |
| cb8564_c38035/f1p0/2770                                                                                             | isoform=cb8564_c54019;full_length_coverage=1;non_full_length_coverage=1;isoform_length=2940;expected_accuracy=0.991 | 1                       | 2035 | 2033 | 2754 | 7    | 202  | 7    | 2217 | 293 |
| cb8813_c1/f2p0/1129                                                                                                 | gnl BL_ORD_ID 18429                                                                                                 | cb8813_c2/f1p0/2264     | 237  | 1129 | 35   | 238  | 1229 | 212  | 1    | 206 |

|                                                                                                                                                  |                                                                                                                                                                           |     |      |      |      |     |      |      |      |   |
|--------------------------------------------------------------------------------------------------------------------------------------------------|---------------------------------------------------------------------------------------------------------------------------------------------------------------------------|-----|------|------|------|-----|------|------|------|---|
| isoform=cb8813_c1;full_length_coverage=2;non_full_length_coverage=0;isoform_length=1129;expected_accuracy=0.999                                  | isoform=cb8813_c2;full_length_coverage=1;non_full_length_coverage=0;isoform_length=2264;expected_accuracy=0.997                                                           |     |      |      |      |     |      |      |      | 0 |
| cb8564_c85665/f1p0/3087                                                                                                                          | gnl BL_ORD_ID 17429      cb8564_c85447/f1p0/3196<br>isoform=cb8564_c85447;full_length_coverage=1;non_full_length_coverage=0;isoform_length=3196;expected_accuracy=0.997   | 2   | 2430 | 2429 | 2965 | 16  | 2413 | 2660 | 3192 |   |
| cb1891_c12/f1p0/3403<br>isoform=cb1891_c12;full_length_coverage=1;non_full_length_coverage=0;isoform_length=3403;expected_accuracy=0.999         | gnl BL_ORD_ID 36331      cb1891_c13/f1p1/7475<br>isoform=cb1891_c13;full_length_coverage=1;non_full_length_coverage=1;isoform_length=7475;expected_accuracy=0.997         | 1   | 2744 | 2740 | 3403 | 102 | 2840 | 6809 | 7475 |   |
| cb8564_c109782/f2p0/1931<br>isoform=cb8564_c109782;full_length_coverage=2;non_full_length_coverage=0;isoform_length=1931;expected_accuracy=0.999 | gnl BL_ORD_ID 53451      cb8564_c125376/f1p0/2051                                                                                                                         | 1   | 1551 | 1551 | 1878 | 1   | 1552 | 1661 | 1987 |   |
| cb8564_c40598/f1p4/3119                                                                                                                          | gnl BL_ORD_ID 12440      cb8564_c130435/f1p3/3226<br>isoform=cb8564_c130435;full_length_coverage=1;non_full_length_coverage=3;isoform_length=3226;expected_accuracy=0.994 | 1   | 2732 | 2729 | 3055 | 2   | 2758 | 2879 | 3214 |   |
| cb454_c33/f1p0/2337<br>isoform=cb454_c33;full_length_coverage=1;non_full_length_coverage=0;isoform_length=2337;expected_accuracy=0.997           | gnl BL_ORD_ID 42150      cb454_c1/f3p0/2382<br>isoform=cb454_c1;full_length_coverage=3;non_full_length_coverage=0;isoform_length=2382;expected_accuracy=1.000             | 252 | 2335 | 69   | 251  | 296 | 2379 | 7    | 189  |   |
| cb8564_c387/f2p0/2124<br>isoform=cb8564_c387;full_length_coverage=2;non_full_length_coverage=0;isoform_length=2124;expected_acc                  | gnl BL_ORD_ID 9245      cb8564_c1146/f2p1/2474<br>isoform=cb8564_c1146;full_length_coverage=2;non_full_length_coverage=1;isoform_length=2474;expected_acc                 | 1   | 1133 | 1132 | 2124 | 137 | 1259 | 1482 | 2473 |   |

|                          |                                                                                                                                                                           |      |      |      |      |      |      |      |      |  |
|--------------------------|---------------------------------------------------------------------------------------------------------------------------------------------------------------------------|------|------|------|------|------|------|------|------|--|
| uracy=1.000              | uracy=0.996                                                                                                                                                               |      |      |      |      |      |      |      |      |  |
| cb8564_c116509/f1p0/3009 | gnl BL_ORD_ID 12113      cb8564_c147548/f5p1/3243<br>isoform=cb8564_c147548;full_length_coverage=5;non_full_length_coverage=1;isoform_length=3243;expected_accuracy=0.996 | 1    | 2016 | 2015 | 2988 | 24   | 2040 | 2264 | 3241 |  |
| cb8564_c114742/f2p1/2028 | gnl BL_ORD_ID 53307      cb8564_c121613/f1p0/2393<br>isoform=cb8564_c114742;full_length_coverage=2;non_full_length_coverage=1;isoform_length=2028;expected_accuracy=0.999 | 1015 | 2028 | 1    | 1018 | 1259 | 2270 | 2    | 1019 |  |
| cb229_c8/f1p1/4650       | gnl BL_ORD_ID 38783      cb229_c3/f1p1/4847<br>isoform=cb229_c8;full_length_coverage=1;non_full_length_coverage=1;isoform_length=4650;expected_accuracy=0.996             | 1    | 2334 | 2335 | 4650 | 27   | 2362 | 2479 | 4794 |  |
| cb9042_c7/f1p1/1973      | gnl BL_ORD_ID 20047      cb9042_c1/f3p1/2206<br>isoform=cb9042_c7;full_length_coverage=1;non_full_length_coverage=1;isoform_length=1973;expected_accuracy=0.993           | 102  | 1973 | 1    | 101  | 328  | 2201 | 1    | 100  |  |
| cb8564_c38035/f1p0/2770  | gnl BL_ORD_ID 15496      cb8564_c47853/f1p0/2927<br>isoform=cb8564_c47853;full_length_coverage=1;non_full_length_coverage=0;isoform_length=2927;expected_accuracy=0.991   | 1    | 2030 | 2033 | 2755 | 1    | 2016 | 2208 | 2927 |  |
| cb8564_c181853/f1p0/2119 | gnl BL_ORD_ID 55839      cb8564_c43677/f1p0/3269<br>isoform=cb8564_c181853;full_length_coverage=1;non_full_length_coverage=0;isoform_length=2119;expected_accuracy=0.997  | 1    | 1339 | 1334 | 2113 | 55   | 1394 | 2222 | 2999 |  |
| cb3763_c18/f1p0/2884     | gnl BL_ORD_ID 71497      cb3763_c45/f1p0/3130                                                                                                                             | 1234 | 2877 | 1    | 1237 | 1361 | 300  | 11   | 124  |  |

|                                                                                                                     |                                                                                                                     |                         |     |      |      |      |      |      |      |      |
|---------------------------------------------------------------------------------------------------------------------|---------------------------------------------------------------------------------------------------------------------|-------------------------|-----|------|------|------|------|------|------|------|
|                                                                                                                     |                                                                                                                     |                         |     |      |      |      |      | 4    | 7    |      |
| cb5125_c36/f1p0/1789                                                                                                | gnl BL_ORD_ID 43698                                                                                                 | cb5125_c6/f8p4/2105     |     |      |      |      |      |      |      |      |
| isoform=cb5125_c36;full_length_coverage=1;non_full_length_coverage=0;isoform_length=1789;expected_accuracy=0.998    | isoform=cb5125_c6;full_length_coverage=8;non_full_length_coverage=4;isoform_length=2105;expected_accuracy=1.000     |                         | 1   | 1163 | 1158 | 1789 | 14   | 1176 | 1382 | 2014 |
| cb8564_c13282/f1p2/2892                                                                                             | gnl BL_ORD_ID 13075                                                                                                 | cb8564_c17357/f1p1/3002 |     |      |      |      |      |      |      |      |
| isoform=cb8564_c13282;full_length_coverage=1;non_full_length_coverage=2;isoform_length=2892;expected_accuracy=0.994 | isoform=cb8564_c17357;full_length_coverage=1;non_full_length_coverage=1;isoform_length=3002;expected_accuracy=0.992 |                         | 14  | 1771 | 1767 | 2887 | 1    | 1755 | 1888 | 3002 |
| cb4063_c17/f1p0/2890                                                                                                | gnl BL_ORD_ID 40735                                                                                                 | cb4063_c6/f1p0/2803     |     |      |      |      |      |      |      |      |
|                                                                                                                     | isoform=cb4063_c6;full_length_coverage=1;non_full_length_coverage=0;isoform_length=2803;expected_accuracy=0.995     |                         | 215 | 2496 | 103  | 216  | 482  | 2763 | 1    | 114  |
| cb567_c15/f1p0/3394                                                                                                 | gnl BL_ORD_ID 45926                                                                                                 | cb567_c4/f1p0/3256      |     |      |      |      |      |      |      |      |
|                                                                                                                     | isoform=cb567_c4;full_length_coverage=1;non_full_length_coverage=0;isoform_length=3256;expected_accuracy=0.996      |                         | 2   | 2687 | 2685 | 3112 | 4    | 2689 | 2829 | 3256 |
| cb2336_c12/f1p1/5436                                                                                                | gnl BL_ORD_ID 38632                                                                                                 | cb2336_c11/f1p1/6811    |     |      |      |      |      |      |      |      |
| isoform=cb2336_c12;full_length_coverage=1;non_full_length_coverage=1;isoform_length=5436;expected_accuracy=0.997    | isoform=cb2336_c11;full_length_coverage=1;non_full_length_coverage=1;isoform_length=6811;expected_accuracy=0.999    |                         | 1   | 3743 | 3740 | 5369 | 1282 | 5030 | 5180 | 6811 |
| cb8564_c4261/f1p0/1862                                                                                              | gnl BL_ORD_ID 15183                                                                                                 | cb8564_c4259/f2p0/2998  |     |      |      |      |      |      |      |      |
|                                                                                                                     | isoform=cb8564_c4259;full_length_coverage=2;non_full_length_coverage=0;isoform_length=2998;expected_accuracy=1.000  |                         | 1   | 1541 | 1539 | 1839 | 1    | 1540 | 2698 | 2998 |
| cb3618_c25/f1p0/2107                                                                                                | gnl BL_ORD_ID 71383                                                                                                 | cb3618_c11/f1p0/2951    |     |      |      |      |      |      |      |      |
|                                                                                                                     |                                                                                                                     |                         | 132 | 2107 | 1    | 131  | 804  | 277  | 73   | 203  |



|                         |                                                                                                                                                                             |      |      |      |      |      |      |      |      |
|-------------------------|-----------------------------------------------------------------------------------------------------------------------------------------------------------------------------|------|------|------|------|------|------|------|------|
|                         |                                                                                                                                                                             |      |      |      |      |      |      | 9    |      |
| cb1433_c8/f1p0/4081     | gnl BL_ORD_ID 25224          cb1433_c2/f1p0/4326<br>isoform=cb1433_c2;full_length_coverage=1;non_full_length_coverage=0;isoform_length=4326;expected_accuracy=0.997         | 247  | 4046 | 1    | 247  | 532  | 4326 | 3    | 249  |
| cb6530_c26/f1p0/2387    | gnl BL_ORD_ID 49806          cb6530_c44/f1p0/2497<br>isoform=cb6530_c26;full_length_coverage=1;non_full_length_coverage=0;isoform_length=2387;expected_accuracy=0.998       | 1009 | 2377 | 1    | 1010 | 1121 | 2489 | 8    | 1017 |
| cb8564_c13319/f1p3/2892 | gnl BL_ORD_ID 57988          cb8564_c86038/f1p0/3338<br>isoform=cb8564_c13319;full_length_coverage=1;non_full_length_coverage=3;isoform_length=2892;expected_accuracy=0.996 | 155  | 2892 | 1    | 156  | 324  | 3062 | 32   | 188  |
| cb10330_c6/f1p0/1244    | gnl BL_ORD_ID 505          cb10330_c1/f1p0/1746<br>isoform=cb10330_c1;full_length_coverage=1;non_full_length_coverage=0;isoform_length=1746;expected_accuracy=0.992         | 129  | 1199 | 2    | 129  | 421  | 1489 | 66   | 194  |
| cb452_c17/f2p0/4042     | gnl BL_ORD_ID 41873          cb452_c22/f1p0/4230<br>isoform=cb452_c17;full_length_coverage=2;non_full_length_coverage=0;isoform_length=4042;expected_accuracy=0.997         | 130  | 3074 | 3075 | 4017 | 1    | 2942 | 3289 | 4230 |
| cb8564_c34047/f2p0/3175 | gnl BL_ORD_ID 15130          cb8564_c33393/f7p2/3346<br>isoform=cb8564_c34047;full_length_coverage=2;non_full_length_coverage=0;isoform_length=3175;expected_accuracy=1.000 | 1    | 2174 | 2171 | 3175 | 1    | 2173 | 2293 | 3297 |
| cb388_c34/f1p0/3652     | gnl BL_ORD_ID 69593          cb388_c51/f1p0/3691                                                                                                                            | 225  | 3487 | 21   | 224  | 364  | 362  | 21   | 222  |

|                                                                                                                                                  |                                                                                                                                                                            |      |      |      |      |      |          |      |          |
|--------------------------------------------------------------------------------------------------------------------------------------------------|----------------------------------------------------------------------------------------------------------------------------------------------------------------------------|------|------|------|------|------|----------|------|----------|
| cb7189_c8/f1p0/2376                                                                                                                              | gnl BL_ORD_ID 51024 cb7189_c10/f1p0/2311                                                                                                                                   | 1    | 1304 | 1304 | 2063 | 242  | 154<br>5 | 1440 | 219<br>9 |
| cb2719_c47/f2p0/2857                                                                                                                             | gnl BL_ORD_ID 37134 cb2719_c32/f1p0/2977<br>isoform=cb2719_c32;full_length_coverage=1;non_full_l<br>ength_coverage=0;isoform_length=2977;expected_accu<br>racy=0.997       | 234  | 2841 | 1    | 235  | 369  | 297<br>6 | 22   | 256      |
| cb4972_c64/f1p0/2792                                                                                                                             | gnl BL_ORD_ID 43215 cb4972_c0/f12p1/2841<br>isoform=cb4972_c0;full_length_coverage=12;non_full_l<br>ength_coverage=1;isoform_length=2841;expected_accu<br>racy=1.000       | 1    | 1345 | 1344 | 2670 | 40   | 138<br>3 | 1513 | 284<br>1 |
| cb10088_c26/f1p0/1030                                                                                                                            | gnl BL_ORD_ID 62560 cb13559_c9/f1p0/1399                                                                                                                                   | 476  | 1034 | 9    | 479  | 774  | 133<br>2 | 1    | 471      |
| cb8564_c119657/f1p2/2788                                                                                                                         | gnl BL_ORD_ID 16193 cb8564_c76962/f1p2/3049<br>isoform=cb8564_c76962;full_length_coverage=1;non_fu<br>ll_length_coverage=2;isoform_length=3049;expected_ac<br>curacy=0.997 | 15   | 1742 | 1740 | 2676 | 7    | 173<br>3 | 2113 | 304<br>9 |
| cb1860_c13/f1p0/2150<br>isoform=cb1860_c13;full_length_coverage=1;non_full_<br>length_coverage=0;isoform_length=2150;expected_accu<br>racy=0.998 | gnl BL_ORD_ID 34656 cb1860_c12/f1p3/2509<br>isoform=cb1860_c12;full_length_coverage=1;non_full_l<br>ength_coverage=3;isoform_length=2509;expected_accu<br>racy=0.996       | 1    | 1277 | 1273 | 2102 | 115  | 139<br>2 | 1645 | 248<br>0 |
| cb3557_c22/f1p0/2990                                                                                                                             | gnl BL_ORD_ID 70457 cb3557_c31/f1p0/2861                                                                                                                                   | 1134 | 2722 | 1    | 1135 | 1297 | 288<br>5 | 1    | 1135     |
| cb8485_c1/f2p0/2382<br>isoform=cb8485_c1;full_length_coverage=2;non_full_le<br>ngth_coverage=0;isoform_length=2382;expected_accu                 | gnl BL_ORD_ID 10135 cb8485_c2/f1p0/2791<br>isoform=cb8485_c2;full_length_coverage=1;non_full_le<br>ngth_coverage=0;isoform_length=2791;expected_accu                       | 107  | 1591 | 1588 | 2377 | 1    | 148<br>5 | 2004 | 279<br>1 |

|                          |                                                                                                                                                                                           |     |      |      |      |      |      |      |      |  |
|--------------------------|-------------------------------------------------------------------------------------------------------------------------------------------------------------------------------------------|-----|------|------|------|------|------|------|------|--|
| acy=0.996                | cy=0.994                                                                                                                                                                                  |     |      |      |      |      |      |      |      |  |
| cb3312_c16/f1p0/1452     | gnl BL_ORD_ID 40961                      cb3312_c14/f1p1/3482<br>isoform=cb3312_c14;full_length_coverage=1;non_full_length_coverage=1;isoform_length=3482;expected_accuracy=0.996         | 1   | 1094 | 1094 | 1456 | 1    | 1093 | 2972 | 3334 |  |
| cb8564_c45609/f1p0/3991  | gnl BL_ORD_ID 55964   cb8564_c50435/f1p0/4916                                                                                                                                             | 260 | 3797 | 23   | 260  | 436  | 3974 | 4    | 241  |  |
| cb4664_c0/f6p1/2463      | gnl BL_ORD_ID 72828   cb4664_c13/f1p0/2651<br>isoform=cb4664_c0;full_length_coverage=6;non_full_length_coverage=1;isoform_length=2463;expected_accuracy=0.996                             | 232 | 2463 | 1    | 231  | 383  | 2613 | 1    | 232  |  |
| cb1333_c96/f1p0/1554     | gnl BL_ORD_ID 26023                      cb1333_c10/f4p0/1937<br>isoform=cb1333_c96;full_length_coverage=1;non_full_length_coverage=0;isoform_length=1554;expected_accuracy=0.991         | 143 | 1554 | 1    | 142  | 503  | 1916 | 1    | 142  |  |
| cb8564_c118659/f2p0/3437 | gnl BL_ORD_ID 10567                      cb8564_c118715/f1p0/3592<br>isoform=cb8564_c118659;full_length_coverage=2;non_full_length_coverage=0;isoform_length=3437;expected_accuracy=0.994 | 1   | 2754 | 2752 | 3268 | 83   | 2848 | 3078 | 3592 |  |
| cb146_c9/f1p0/1387       | gnl BL_ORD_ID 30275                      cb146_c5/f1p0/4805<br>isoform=cb146_c5;full_length_coverage=1;non_full_length_coverage=0;isoform_length=4805;expected_accuracy=0.997             | 230 | 1344 | 29   | 231  | 3692 | 4805 | 1    | 203  |  |
| cb8564_c33962/f2p1/3330  | gnl BL_ORD_ID 57290   cb8564_c89168/f1p0/3652<br>isoform=cb8564_c33962;full_length_coverage=2;non_full_length_coverage=1;isoform_length=3330;expected_                                    | 1   | 2869 | 2873 | 3178 | 27   | 2889 | 3093 | 3398 |  |

| accuracy=1.000           |                                                                                                                                                                           |      |      |      |      |      |          |      |          |  |
|--------------------------|---------------------------------------------------------------------------------------------------------------------------------------------------------------------------|------|------|------|------|------|----------|------|----------|--|
| cb18456_c4245/f1p0/1080  | gnl BL_ORD_ID 36303      cb18456_c4072/f1p0/1343<br>isoform=cb18456_c4072;full_length_coverage=1;non_full_length_coverage=0;isoform_length=1343;expected_accuracy=0.998   | 7    | 512  | 508  | 1079 | 1    | 495      | 604  | 1187     |  |
| cb6111_c25/f1p0/1520     | gnl BL_ORD_ID 74915      cb6111_c17/f1p0/1775<br>isoform=cb6111_c25;full_length_coverage=1;non_full_length_coverage=0;isoform_length=1520;expected_accuracy=0.993         | 118  | 1520 | 10   | 123  | 272  | 167<br>3 | 14   | 128      |  |
| cb8564_c115923/f1p0/2925 | gnl BL_ORD_ID 14608      cb8564_c23723/f1p0/3118<br>isoform=cb8564_c23723;full_length_coverage=1;non_full_length_coverage=0;isoform_length=3118;expected_accuracy=0.992   | 13   | 1675 | 1675 | 2550 | 2    | 165<br>9 | 2242 | 3118     |  |
| cb3907_c9/f1p0/2875      | gnl BL_ORD_ID 40128      cb3907_c4/f1p0/3038<br>isoform=cb3907_c4;full_length_coverage=1;non_full_length_coverage=0;isoform_length=3038;expected_accuracy=0.992           | 1    | 1474 | 1475 | 2654 | 16   | 150<br>2 | 1872 | 303<br>7 |  |
| cb8564_c38035/f1p0/2770  | gnl BL_ORD_ID 16473      cb8564_c51923/f1p1/2966<br>isoform=cb8564_c51923;full_length_coverage=1;non_full_length_coverage=1;isoform_length=2966;expected_accuracy=0.997   | 1    | 2035 | 2033 | 2756 | 1    | 204<br>9 | 2239 | 296<br>3 |  |
| cb8564_c123093/f1p0/2918 | gnl BL_ORD_ID 11608      cb8564_c146551/f1p1/3093<br>isoform=cb8564_c146551;full_length_coverage=1;non_full_length_coverage=1;isoform_length=3093;expected_accuracy=1.000 | 1214 | 2924 | 1    | 1213 | 1183 | 289<br>3 | 87   | 129<br>9 |  |
| cb2818_c34/f1p0/3053     | gnl BL_ORD_ID 38982      cb2818_c74/f3p0/3087                                                                                                                             | 114  | 2904 | 1    | 119  | 297  | 308      | 23   | 141      |  |

|                        |                                                                                                                    |                                            |      |      |      |      |      |      |      |      |
|------------------------|--------------------------------------------------------------------------------------------------------------------|--------------------------------------------|------|------|------|------|------|------|------|------|
|                        | isoform=cb2818_c74;full_length_coverage=3;non_full_length_coverage=0;isoform_length=3087;expected_accuracy=1.000   |                                            |      |      |      |      |      | 7    |      |      |
| cb2845_c38/f1p0/1808   | isoform=cb2845_c38;full_length_coverage=1;non_full_length_coverage=0;isoform_length=1808;expected_accuracy=0.993   | gnl BL_ORD_ID 70029 cb2845_c34/f1p0/3557   | 1    | 1403 | 1403 | 1788 | 1580 | 3008 | 3131 | 3516 |
| cb8995_c8/f1p0/2000    | isoform=cb8995_c8;full_length_coverage=1;non_full_length_coverage=0;isoform_length=2000;expected_accuracy=1.000    | gnl BL_ORD_ID 20765 cb8995_c10/f1p0/2440   | 97   | 2000 | 1    | 100  | 213  | 2116 | 1    | 101  |
| cb10490_c4/f1p0/1258   |                                                                                                                    | gnl BL_ORD_ID 48584 cb10490_c5/f1p0/2250   | 427  | 1072 | 7    | 429  | 1597 | 2242 | 36   | 458  |
| cb18456_c929/f1p1/1404 | isoform=cb18456_c929;full_length_coverage=1;non_full_length_coverage=1;isoform_length=1404;expected_accuracy=0.994 | gnl BL_ORD_ID 53691 cb8564_c1249/f1p1/2145 | 438  | 1356 | 8    | 440  | 1219 | 2140 | 1    | 430  |
| cb8564_c898/f2p0/2398  | isoform=cb8564_c898;full_length_coverage=2;non_full_length_coverage=0;isoform_length=2398;expected_accuracy=0.999  | gnl BL_ORD_ID 15309 cb8564_c4215/f1p0/4987 | 494  | 2398 | 63   | 493  | 3071 | 4972 | 1    | 430  |
| cb1415_c16/f1p0/3004   | isoform=cb1415_c16;full_length_coverage=1;non_full_length_coverage=0;isoform_length=3004;expected_accuracy=0.995   | gnl BL_ORD_ID 27156 cb1415_c7/f1p0/3750    | 1464 | 3004 | 1    | 1465 | 2153 | 3712 | 55   | 1517 |
| cb5714_c11/f1p0/1261   |                                                                                                                    | gnl BL_ORD_ID 74327 cb5714_c3/f1p0/2759    | 247  | 1261 | 43   | 250  | 1698 | 271  | 65   | 269  |

|                                                                                                                  |                                                                                                                      |                         |     |      |      |      |      |      |      |     |
|------------------------------------------------------------------------------------------------------------------|----------------------------------------------------------------------------------------------------------------------|-------------------------|-----|------|------|------|------|------|------|-----|
| isoform=cb5714_c11;full_length_coverage=1;non_full_length_coverage=0;isoform_length=1261;expected_accuracy=0.990 |                                                                                                                      |                         |     |      |      |      |      | 6    |      |     |
| cb3143_c10/f1p1/2863                                                                                             | gnl BL_ORD_ID 69160                                                                                                  | cb3143_c4/f1p0/3643     | 163 | 2870 | 1    | 163  | 687  | 339  | 122  | 284 |
|                                                                                                                  | gnl BL_ORD_ID 466                                                                                                    | cb10539_c2/f1p0/4443    |     |      |      |      |      | 3    |      |     |
| cb10539_c0/f13p0/1103                                                                                            | isoform=cb10539_c2;full_length_coverage=1;non_full_length_coverage=0;isoform_length=4443;expected_accuracy=0.994     |                         | 415 | 1105 | 52   | 416  | 3683 | 437  | 1    | 371 |
|                                                                                                                  | gnl BL_ORD_ID 43698                                                                                                  | cb5125_c6/f8p4/2105     |     |      |      |      |      | 4    |      |     |
| cb5125_c34/f1p0/1890                                                                                             | isoform=cb5125_c6;full_length_coverage=8;non_full_length_coverage=4;isoform_length=2105;expected_accuracy=1.000      |                         | 1   | 1145 | 1144 | 1780 | 7    | 1148 | 1340 | 197 |
|                                                                                                                  | gnl BL_ORD_ID 14274                                                                                                  | cb8564_c34179/f3p0/2531 |     |      |      |      |      | 5    |      | 5   |
| cb8564_c184250/f1p0/2256                                                                                         | isoform=cb8564_c184250;full_length_coverage=1;non_full_length_coverage=0;isoform_length=2256;expected_accuracy=0.996 |                         | 1   | 1642 | 1638 | 2256 | 1    | 164  | 1906 | 252 |
|                                                                                                                  | gnl BL_ORD_ID 54892                                                                                                  | cb8564_c3430/f1p1/2229  |     |      |      |      |      | 1    |      | 4   |
| cb18456_c7297/f1p0/1408                                                                                          | isoform=cb8564_c34179;full_length_coverage=3;non_full_length_coverage=0;isoform_length=2531;expected_accuracy=0.999  |                         | 520 | 1317 | 8    | 519  | 1394 | 219  | 18   | 530 |
|                                                                                                                  | gnl BL_ORD_ID 11222                                                                                                  | cb8564_c13611/f1p0/4658 |     |      |      |      |      | 1    |      |     |
| cb8564_c10938/f1p1/2321                                                                                          | isoform=cb8564_c13611;full_length_coverage=1;non_full_length_coverage=0;isoform_length=4658;expected_accuracy=0.991  |                         | 1   | 1315 | 1310 | 2292 | 2249 | 355  | 3677 | 465 |
|                                                                                                                  | gnl BL_ORD_ID 20055                                                                                                  | cb8941_c0/f1p0/2230     |     |      |      |      |      | 9    |      | 8   |
| cb8941_c4/f1p0/1811                                                                                              | isoform=cb8941_c0;full_length_coverage=1;non_full_length_coverage=0;isoform_length=1811;expected_accuracy=0.990      |                         | 1   | 1183 | 1183 | 1811 | 21   | 120  | 1570 | 220 |
|                                                                                                                  | gnl BL_ORD_ID 20055                                                                                                  | cb8941_c0/f1p0/2230     |     |      |      |      |      | 9    |      | 9   |

|                                                                                                                                                      |                                                                                                                                                                      |     |      |      |      |     |          |      |          |
|------------------------------------------------------------------------------------------------------------------------------------------------------|----------------------------------------------------------------------------------------------------------------------------------------------------------------------|-----|------|------|------|-----|----------|------|----------|
| cy=0.999<br>cb4966_c14/f1p0/2442<br>isoform=cb4966_c14;full_length_coverage=1;non_full_length_coverage=0;isoform_length=2442;expected_accuracy=0.994 | cy=1.000<br>gnl BL_ORD_ID 73135 cb4966_c13/f1p0/3284                                                                                                                 | 1   | 1524 | 1522 | 2430 | 4   | 153<br>1 | 2204 | 310<br>9 |
| cb15082_c1/f1p0/1736                                                                                                                                 | gnl BL_ORD_ID 53645 cb8564_c144123/f1p0/2074                                                                                                                         | 120 | 1736 | 1    | 120  | 406 | 202<br>2 | 4    | 123      |
| cb5422_c6/f1p0/1857                                                                                                                                  | gnl BL_ORD_ID 45246 cb5422_c11/f1p0/5531<br>isoform=cb5422_c11;full_length_coverage=1;non_full_length_coverage=0;isoform_length=5531;expected_accuracy=0.998         | 1   | 1128 | 1127 | 1850 | 160 | 128<br>7 | 4809 | 553<br>1 |
| cb16877_c1/f1p1/1742                                                                                                                                 | gnl BL_ORD_ID 53708 cb8564_c1398/f1p0/2214                                                                                                                           | 107 | 1747 | 1    | 108  | 454 | 206<br>9 | 4    | 111      |
| cb8564_c146028/f1p2/2149<br>isoform=cb8564_c146028;full_length_coverage=1;non_full_length_coverage=2;isoform_length=2149;expected_accuracy=0.996     | gnl BL_ORD_ID 58073 cb8564_c88099/f1p2/2499                                                                                                                          | 219 | 2143 | 27   | 218  | 428 | 235<br>1 | 7    | 198      |
| cb7863_c23/f1p0/2057<br>isoform=cb7863_c23;full_length_coverage=1;non_full_length_coverage=0;isoform_length=2057;expected_accuracy=0.998             | gnl BL_ORD_ID 8929 cb7863_c6/f3p1/2339<br>isoform=cb7863_c6;full_length_coverage=3;non_full_length_coverage=1;isoform_length=2339;expected_accuracy=0.995            | 264 | 2057 | 64   | 268  | 544 | 233<br>8 | 56   | 261      |
| cb8564_c81890/f1p1/2084<br>isoform=cb8564_c81890;full_length_coverage=1;non_full_length_coverage=1;isoform_length=2084;expected_accuracy=0.994       | gnl BL_ORD_ID 11375 cb8564_c147204/f5p1/2269<br>isoform=cb8564_c147204;full_length_coverage=5;non_full_length_coverage=1;isoform_length=2269;expected_accuracy=0.996 | 1   | 1818 | 1813 | 2084 | 56  | 187<br>3 | 1984 | 225<br>6 |
| cb6802_c12/f1p0/3195                                                                                                                                 | gnl BL_ORD_ID 50080 cb6802_c20/f1p0/3496                                                                                                                             | 119 | 3195 | 1    | 119  | 428 | 351      | 6    | 123      |

|                                                                                                                     |                                                                                                                     |                         |     |      |      |      |      |      |      |     |
|---------------------------------------------------------------------------------------------------------------------|---------------------------------------------------------------------------------------------------------------------|-------------------------|-----|------|------|------|------|------|------|-----|
| isoform=cb6802_c12;full_length_coverage=1;non_full_length_coverage=0;isoform_length=3195;expected_accuracy=0.997    |                                                                                                                     |                         |     |      |      |      |      |      |      | 3   |
| cb3359_c47/f1p0/1712                                                                                                | gnl BL_ORD_ID 39778                                                                                                 | cb3359_c46/f1p1/1823    |     |      |      |      |      |      |      |     |
| isoform=cb3359_c47;full_length_coverage=1;non_full_length_coverage=0;isoform_length=1712;expected_accuracy=0.996    | isoform=cb3359_c46;full_length_coverage=1;non_full_length_coverage=1;isoform_length=1823;expected_accuracy=0.997    |                         | 1   | 1023 | 1020 | 1686 | 5    | 102  | 1157 | 182 |
| cb8564_c39136/f1p0/3036                                                                                             | gnl BL_ORD_ID 55472                                                                                                 | cb8564_c42531/f1p0/3996 |     |      |      |      |      |      |      |     |
| isoform=cb8564_c39136;full_length_coverage=1;non_full_length_coverage=0;isoform_length=3036;expected_accuracy=0.998 | isoform=cb8564_c42531;full_length_coverage=1;non_full_length_coverage=1;isoform_length=3996;expected_accuracy=0.997 |                         | 124 | 2089 | 2085 | 3034 | 816  | 278  | 2912 | 386 |
| cb1279_c85/f1p0/1794                                                                                                | gnl BL_ORD_ID 25829                                                                                                 | cb1279_c10/f2p0/2859    |     |      |      |      |      |      |      |     |
| isoform=cb1279_c85;full_length_coverage=1;non_full_length_coverage=0;isoform_length=1794;expected_accuracy=0.998    | isoform=cb1279_c10;full_length_coverage=2;non_full_length_coverage=0;isoform_length=2859;expected_accuracy=0.999    |                         | 11  | 1120 | 1115 | 1760 | 1    | 1105 | 2227 | 285 |
| cb2683_c0/f3p0/2464                                                                                                 | gnl BL_ORD_ID 69890                                                                                                 | cb2683_c10/f1p0/3502    |     |      |      |      |      |      |      |     |
| isoform=cb2683_c0;full_length_coverage=3;non_full_length_coverage=0;isoform_length=2464;expected_accuracy=1.000     | isoform=cb2683_c10;full_length_coverage=1;non_full_length_coverage=0;isoform_length=3502;expected_accuracy=0.999    |                         | 441 | 2448 | 93   | 441  | 1384 | 338  | 1    | 349 |
| cb8564_c77802/f1p0/3651                                                                                             | gnl BL_ORD_ID 15895                                                                                                 | cb8564_c75013/f1p0/4362 |     |      |      |      |      |      |      |     |
| isoform=cb8564_c77802;full_length_coverage=1;non_full_length_coverage=0;isoform_length=3651;expected_accuracy=0.996 | isoform=cb8564_c75013;full_length_coverage=1;non_full_length_coverage=0;isoform_length=4362;expected_accuracy=0.995 |                         | 18  | 2317 | 2314 | 3558 | 1    | 230  | 3117 | 436 |
| cb6146_c4/f1p0/2397                                                                                                 | gnl BL_ORD_ID 45009                                                                                                 | cb6146_c5/f1p0/2877     |     |      |      |      |      |      |      |     |
| isoform=cb6146_c4;full_length_coverage=1;non_full_length_coverage=0;isoform_length=2397;expected_accuracy=0.997     | isoform=cb6146_c5;full_length_coverage=1;non_full_length_coverage=0;isoform_length=2877;expected_accuracy=0.997     |                         | 1   | 1190 | 1189 | 2360 | 1    | 1194 | 1706 | 287 |



|                                                                                                                     |                                                                                                                     |                         |     |      |      |      |      |      |      |      |  |  |
|---------------------------------------------------------------------------------------------------------------------|---------------------------------------------------------------------------------------------------------------------|-------------------------|-----|------|------|------|------|------|------|------|--|--|
| acy=0.993                                                                                                           | cy=0.997                                                                                                            |                         |     |      |      |      |      |      |      |      |  |  |
| cb10432_c12/f1p0/1478                                                                                               | gnl BL_ORD_ID 1184                                                                                                  | cb10432_c5/f1p0/1694    |     |      |      |      |      |      |      |      |  |  |
|                                                                                                                     | isoform=cb10432_c5;full_length_coverage=1;non_full_length_coverage=0;isoform_length=1694;expected_accuracy=0.995    |                         | 1   | 1079 | 1074 | 1485 | 1    | 1080 | 1180 | 1590 |  |  |
| cb8101_c9/f1p0/2203                                                                                                 | gnl BL_ORD_ID 51752                                                                                                 | cb8101_c18/f1p0/2567    |     |      |      |      |      |      |      |      |  |  |
| isoform=cb8101_c9;full_length_coverage=1;non_full_length_coverage=0;isoform_length=2203;expected_accuracy=0.997     |                                                                                                                     |                         | 1   | 1617 | 1613 | 2200 | 190  | 1805 | 1919 | 2506 |  |  |
| cb8564_c32252/f4p1/3260                                                                                             | gnl BL_ORD_ID 55446                                                                                                 | cb8564_c41840/f1p0/3409 |     |      |      |      |      |      |      |      |  |  |
| isoform=cb8564_c32252;full_length_coverage=4;non_full_length_coverage=1;isoform_length=3260;expected_accuracy=1.000 |                                                                                                                     |                         | 142 | 3259 | 13   | 141  | 241  | 3359 | 2    | 130  |  |  |
| cb8564_c17357/f1p1/3002                                                                                             | gnl BL_ORD_ID 35901                                                                                                 | cb18782_c0/f1p2/5630    |     |      |      |      |      |      |      |      |  |  |
| isoform=cb8564_c17357;full_length_coverage=1;non_full_length_coverage=1;isoform_length=3002;expected_accuracy=0.992 | isoform=cb18782_c0;full_length_coverage=1;non_full_length_coverage=2;isoform_length=5630;expected_accuracy=0.997    |                         | 1   | 1755 | 1752 | 3002 | 8    | 1769 | 4303 | 5538 |  |  |
| cb8564_c79364/f1p0/2690                                                                                             | gnl BL_ORD_ID 17061                                                                                                 | cb8564_c81806/f2p0/2831 |     |      |      |      |      |      |      |      |  |  |
| isoform=cb8564_c79364;full_length_coverage=1;non_full_length_coverage=0;isoform_length=2690;expected_accuracy=0.997 | isoform=cb8564_c81806;full_length_coverage=2;non_full_length_coverage=0;isoform_length=2831;expected_accuracy=0.999 |                         | 1   | 1379 | 1377 | 2638 | 4    | 1366 | 1573 | 2831 |  |  |
| cb8564_c113392/f1p0/2376                                                                                            | gnl BL_ORD_ID 15266                                                                                                 | cb8564_c3333/f1p0/3954  |     |      |      |      |      |      |      |      |  |  |
|                                                                                                                     | isoform=cb8564_c3333;full_length_coverage=1;non_full_length_coverage=0;isoform_length=3954;expected_accuracy=0.990  |                         | 407 | 2308 | 85   | 407  | 2027 | 3950 | 1    | 327  |  |  |
| cb1891_c9/f1p0/3776                                                                                                 | gnl BL_ORD_ID 36331                                                                                                 | cb1891_c13/f1p1/7475    |     |      |      |      |      |      |      |      |  |  |
|                                                                                                                     |                                                                                                                     |                         | 1   | 2841 | 2841 | 3520 | 2    | 284  | 6770 | 744  |  |  |

|                                                                                                                     |                                                                                                                     |     |      |      |      |     |     |      |      |   |
|---------------------------------------------------------------------------------------------------------------------|---------------------------------------------------------------------------------------------------------------------|-----|------|------|------|-----|-----|------|------|---|
|                                                                                                                     | isoform=cb1891_c13;full_length_coverage=1;non_full_length_coverage=1;isoform_length=7475;expected_accuracy=0.997    |     |      |      |      |     |     | 1    |      | 9 |
| cb12003_c31/f1p0/1799                                                                                               | gnl BL_ORD_ID 42024          cb4768_c16/f1p0/1948                                                                   |     |      |      |      |     |     |      |      |   |
| isoform=cb12003_c31;full_length_coverage=1;non_full_length_coverage=0;isoform_length=1799;expected_accuracy=0.997   | isoform=cb4768_c16;full_length_coverage=1;non_full_length_coverage=0;isoform_length=1948;expected_accuracy=0.993    | 1   | 1200 | 1199 | 1799 | 5   | 121 | 1315 | 191  | 5 |
| cb7761_c2/f2p0/1991                                                                                                 | gnl BL_ORD_ID 7622          cb7761_c6/f1p0/2339                                                                     |     |      |      |      |     |     |      |      |   |
| isoform=cb7761_c2;full_length_coverage=2;non_full_length_coverage=0;isoform_length=1991;expected_accuracy=0.999     | isoform=cb7761_c6;full_length_coverage=1;non_full_length_coverage=0;isoform_length=2339;expected_accuracy=0.994     | 570 | 1991 | 58   | 571  | 819 | 225 | 2    | 512  | 8 |
| cb8564_c73216/f1p0/3006                                                                                             | gnl BL_ORD_ID 55939          cb8564_c49630/f1p4/3487                                                                | 28  | 2896 | 2896 | 3146 | 19  | 291 | 3243 | 349  | 3 |
| cb8564_c15608/f1p3/3110                                                                                             | gnl BL_ORD_ID 52054          cb8564_c11371/f1p2/3552                                                                | 1   | 2790 | 2785 | 3102 | 43  | 283 | 2976 | 329  | 3 |
| cb8564_c37361/f1p0/3076                                                                                             | gnl BL_ORD_ID 54425          cb8564_c42906/f1p2/3181                                                                | 1   | 2481 | 2477 | 3070 | 1   | 246 | 2561 | 315  | 4 |
| cb8564_c87721/f1p0/2168                                                                                             | gnl BL_ORD_ID 17522          cb8564_c83241/f1p3/2918                                                                |     |      |      |      |     |     |      |      |   |
| isoform=cb8564_c87721;full_length_coverage=1;non_full_length_coverage=0;isoform_length=2168;expected_accuracy=0.997 | isoform=cb8564_c83241;full_length_coverage=1;non_full_length_coverage=3;isoform_length=2918;expected_accuracy=0.997 | 1   | 1811 | 1809 | 2164 | 103 | 191 | 2566 | 291  | 8 |
| cb8564_c49356/f1p0/3133                                                                                             | gnl BL_ORD_ID 16172          cb8564_c53024/f1p0/3159                                                                |     |      |      |      |     |     |      |      |   |
| isoform=cb8564_c53024;full_length_coverage=1;non_full_length_coverage=0;isoform_length=3159;expected_accuracy=0.996 | isoform=cb8564_c53024;full_length_coverage=1;non_full_length_coverage=0;isoform_length=3159;expected_accuracy=0.996 | 1   | 1696 | 1693 | 2851 | 1   | 169 | 2017 | 315  | 6 |
| cb8564_c16102/f1p0/2566                                                                                             | gnl BL_ORD_ID 14608          cb8564_c23723/f1p0/3118                                                                | 13  | 1684 | 1684 | 2566 | 15  | 165 | 2242 | 3118 |   |

|                                                                                                                                                  |                                                                                                                                                                                                                                                                                                                                                    |     |      |      |      |      |      |      |     |   |
|--------------------------------------------------------------------------------------------------------------------------------------------------|----------------------------------------------------------------------------------------------------------------------------------------------------------------------------------------------------------------------------------------------------------------------------------------------------------------------------------------------------|-----|------|------|------|------|------|------|-----|---|
| isoform=cb8564_c16102;full_length_coverage=1;non_full_length_coverage=0;isoform_length=2566;expected_accuracy=0.992<br>cb910_c31/f1p1/2978       | isoform=cb8564_c23723;full_length_coverage=1;non_full_length_coverage=0;isoform_length=3118;expected_accuracy=0.992                                                                                                                                                                                                                                |     |      |      |      |      |      |      |     | 9 |
| isoform=cb910_c31;full_length_coverage=1;non_full_length_coverage=1;isoform_length=2978;expected_accuracy=0.997<br>cb8564_c43779/f1p0/3021       | gnl BL_ORD_ID 57612 cb910_c84/f1p0/3501                                                                                                                                                                                                                                                                                                            | 1   | 2085 | 2081 | 2978 | 27   | 2111 | 2243 | 314 | 0 |
| isoform=cb8564_c43779;full_length_coverage=1;non_full_length_coverage=0;isoform_length=3021;expected_accuracy=0.993<br>cb8564_c35301/f1p0/2777   | gnl BL_ORD_ID 14471      cb8564_c34518/f1p0/3136<br>isoform=cb8564_c34518;full_length_coverage=1;non_full_length_coverage=0;isoform_length=3136;expected_accuracy=0.991<br>gnl BL_ORD_ID 16879      cb8564_c48606/f1p1/3308<br>isoform=cb8564_c48606;full_length_coverage=1;non_full_length_coverage=1;isoform_length=3308;expected_accuracy=0.998 | 1   | 2341 | 2345 | 3021 | 1    | 2310 | 2468 | 313 | 6 |
| cb8564_c23958/f1p0/2286                                                                                                                          | gnl BL_ORD_ID 16879      cb8564_c48606/f1p1/3308<br>isoform=cb8564_c48606;full_length_coverage=1;non_full_length_coverage=1;isoform_length=3308;expected_accuracy=0.998                                                                                                                                                                            | 125 | 2013 | 2009 | 2729 | 247  | 2151 | 2587 | 330 | 8 |
| isoform=cb8564_c23958;full_length_coverage=1;non_full_length_coverage=0;isoform_length=2286;expected_accuracy=1.000<br>cb8564_c111744/f1p1/2111  | gnl BL_ORD_ID 53903 cb8564_c14264/f1p0/3603                                                                                                                                                                                                                                                                                                        | 1   | 1235 | 1232 | 2286 | 1132 | 2365 | 2527 | 357 | 9 |
| isoform=cb8564_c111744;full_length_coverage=1;non_full_length_coverage=1;isoform_length=2111;expected_accuracy=0.998<br>cb8564_c128252/f1p0/2428 | gnl BL_ORD_ID 14439      cb8564_c3345/f1p0/2570<br>isoform=cb8564_c3345;full_length_coverage=1;non_full_length_coverage=0;isoform_length=2570;expected_accuracy=0.999                                                                                                                                                                              | 13  | 1639 | 1635 | 2111 | 1    | 1624 | 1797 | 227 | 3 |
| cb8564_c128252/f1p0/2428                                                                                                                         | gnl BL_ORD_ID 52094 cb8564_c110646/f1p0/2764                                                                                                                                                                                                                                                                                                       | 17  | 1818 | 1815 | 2456 | 1    | 1810 | 2110 | 275 | 1 |
| cb7969_c11/f1p0/1950                                                                                                                             | gnl BL_ORD_ID 32342      cb1767_c38/f1p1/2725                                                                                                                                                                                                                                                                                                      | 1   | 1409 | 1405 | 1906 | 2181 | 773  | 528  | 27  |   |

|                                                                                                                                             |                                                                                                                                                            |     |      |      |      |      |      |      |      |  |
|---------------------------------------------------------------------------------------------------------------------------------------------|------------------------------------------------------------------------------------------------------------------------------------------------------------|-----|------|------|------|------|------|------|------|--|
| isoform=cb7969_c11;full_length_coverage=1;non_full_length_coverage=0;isoform_length=1950;expected_accuracy=0.992<br>cb8564_c39136/f1p0/3036 | isoform=cb1767_c38;full_length_coverage=1;non_full_length_coverage=1;isoform_length=2725;expected_accuracy=0.993                                           |     |      |      |      |      |      |      |      |  |
| isoform=cb8564_c39136;full_length_coverage=1;non_full_length_coverage=0;isoform_length=3036;expected_accuracy=0.998                         | gnl BL_ORD_ID 53680 cb8564_c153222/f2p39/3454                                                                                                              | 1   | 2089 | 2085 | 3024 | 7    | 2102 | 2229 | 3170 |  |
| cb295_c28/f1p1/2235                                                                                                                         | gnl BL_ORD_ID 37900 cb295_c23/f1p1/2681<br>isoform=cb295_c23;full_length_coverage=1;non_full_length_coverage=1;isoform_length=2681;expected_accuracy=0.993 | 1   | 1359 | 1358 | 2050 | 1    | 1349 | 1987 | 2681 |  |
| cb4821_c9/f1p0/1558                                                                                                                         | gnl BL_ORD_ID 43064 cb4821_c4/f2p0/3249<br>isoform=cb4821_c4;full_length_coverage=2;non_full_length_coverage=0;isoform_length=3249;expected_accuracy=0.999 | 490 | 1467 | 7    | 489  | 2049 | 3023 | 1    | 484  |  |
| cb2097_c87/f1p2/2320                                                                                                                        | gnl BL_ORD_ID 66709 cb2097_c98/f1p0/3073                                                                                                                   | 549 | 2304 | 57   | 548  | 946  | 2702 | 196  | 684  |  |
| cb12003_c71/f1p0/1043                                                                                                                       | gnl BL_ORD_ID 71997 cb4768_c38/f1p1/2233                                                                                                                   | 336 | 1043 | 44   | 340  | 789  | 1496 | 272  | 568  |  |
| cb12470_c9/f1p2/1842                                                                                                                        | gnl BL_ORD_ID 9247 cb8564_c1145/f1p2/1988<br>isoform=cb8564_c1145;full_length_coverage=1;non_full_length_coverage=2;isoform_length=1842;expected_acc       | 1   | 1445 | 1443 | 1842 | 3    | 1446 | 1582 | 1982 |  |

|                                                                                                                                                                               |                                                                                                                                                                                      |   |      |      |      |     |          |      |          |
|-------------------------------------------------------------------------------------------------------------------------------------------------------------------------------|--------------------------------------------------------------------------------------------------------------------------------------------------------------------------------------|---|------|------|------|-----|----------|------|----------|
| racy=0.992<br>cb2155_c11/f1p0/2668<br>isoform=cb2155_c11;full_length_coverage=1;non_full_length_coverage=0;isoform_length=2668;expected_accuracy=1.000                        | uracy=0.995<br>gnl BL_ORD_ID 35419          cb2155_c25/f2p1/2883<br>isoform=cb2155_c25;full_length_coverage=2;non_full_length_coverage=1;isoform_length=2883;expected_accuracy=0.996 | 1 | 2105 | 2106 | 2668 | 91  | 219<br>4 | 2312 | 287<br>3 |
| cb8564_c36731/f1p2/2761<br><br>cb8564_c45150/f1p0/2940<br>isoform=cb8564_c45150;full_length_coverage=1;non_full_length_coverage=0;isoform_length=2940;expected_accuracy=0.992 | gnl BL_ORD_ID 55502   cb8564_c43538/f1p0/3563<br><br>gnl BL_ORD_ID 55920   cb8564_c48949/f1p0/4357                                                                                   | 1 | 1977 | 1972 | 2739 | 2   | 198<br>5 | 2414 | 318<br>1 |
| cb8564_c675/f4p4/2437<br>isoform=cb8564_c675;full_length_coverage=4;non_full_length_coverage=4;isoform_length=2437;expected_accuracy=1.000                                    | gnl BL_ORD_ID 12956          cb8564_c1771/f3p1/3767<br>isoform=cb8564_c1771;full_length_coverage=3;non_full_length_coverage=1;isoform_length=3767;expected_accuracy=0.996            | 1 | 1217 | 1215 | 2338 | 119 | 133<br>4 | 2646 | 376<br>7 |
| cb910_c28/f1p1/2974<br>isoform=cb910_c28;full_length_coverage=1;non_full_length_coverage=1;isoform_length=2974;expected_accuracy=0.995                                        | gnl BL_ORD_ID 57612   cb910_c84/f1p0/3501                                                                                                                                            | 1 | 2158 | 2156 | 2974 | 29  | 218<br>6 | 2302 | 312<br>0 |
| cb16925_c1/f1p0/1736<br>isoform=cb16925_c1;full_length_coverage=1;non_full_length_coverage=0;isoform_length=1736;expected_accuracy=0.999                                      | gnl BL_ORD_ID 11762          cb8564_c1407/f7p0/2261<br>isoform=cb8564_c1407;full_length_coverage=7;non_full_length_coverage=0;isoform_length=2261;expected_accuracy=1.000            | 1 | 1127 | 1127 | 1712 | 1   | 1127     | 1485 | 208<br>5 |
| cb3265_c60/f1p0/2197                                                                                                                                                          | gnl BL_ORD_ID 41239          cb3265_c50/f1p2/2270<br>isoform=cb3265_c50;full_length_coverage=1;non_full_length_coverage=2;isoform_length=2270;expected_accuracy=0.995                | 1 | 1740 | 1742 | 2165 | 6   | 174<br>2 | 1612 | 203<br>4 |



|                                                                                                                     |                                                                                                                     |     |      |      |      |      |      |      |      |  |
|---------------------------------------------------------------------------------------------------------------------|---------------------------------------------------------------------------------------------------------------------|-----|------|------|------|------|------|------|------|--|
|                                                                                                                     | isoform=cb8564_c20033;full_length_coverage=1;non_full_length_coverage=1;isoform_length=3127;expected_accuracy=0.994 |     |      |      |      |      |      | 6    |      |  |
| cb1648_c46/f32p0/2018                                                                                               |                                                                                                                     |     |      |      |      |      |      |      |      |  |
| isoform=cb1648_c46;full_length_coverage=32;non_full_length_coverage=0;isoform_length=2018;expected_accuracy=1.000   | gnl BL_ORD_ID 66333 cb1648_c27/f1p1/2264                                                                            | 245 | 2018 | 27   | 245  | 382  | 2153 | 1    | 233  |  |
| cb9201_c6/f1p0/2240                                                                                                 | gnl BL_ORD_ID 19588 cb9201_c2/f1p0/3381                                                                             |     |      |      |      |      |      |      |      |  |
|                                                                                                                     | isoform=cb9201_c2;full_length_coverage=1;non_full_length_coverage=0;isoform_length=3381;expected_accuracy=0.995     | 414 | 2065 | 6    | 414  | 1735 | 3381 | 74   | 479  |  |
| cb8564_c45440/f1p0/2458                                                                                             |                                                                                                                     |     |      |      |      |      |      |      |      |  |
| isoform=cb8564_c45440;full_length_coverage=1;non_full_length_coverage=0;isoform_length=2458;expected_accuracy=0.992 | gnl BL_ORD_ID 56073 cb8564_c54187/f1p0/3412                                                                         | 306 | 2458 | 49   | 310  | 1117 | 3261 | 1    | 261  |  |
| cb8564_c85288/f1p2/2983                                                                                             |                                                                                                                     |     |      |      |      |      |      |      |      |  |
| isoform=cb8564_c85288;full_length_coverage=1;non_full_length_coverage=2;isoform_length=2983;expected_accuracy=0.999 | gnl BL_ORD_ID 55821 cb8564_c41766/f1p2/3241                                                                         | 1   | 2289 | 2289 | 2969 | 40   | 2334 | 2575 | 3255 |  |
| cb8564_c2150/f1p0/2358                                                                                              | gnl BL_ORD_ID 13555 cb8564_c2143/f1p1/2668                                                                          |     |      |      |      |      |      |      |      |  |
|                                                                                                                     | isoform=cb8564_c2143;full_length_coverage=1;non_full_length_coverage=1;isoform_length=2668;expected_accuracy=0.996  | 1   | 2130 | 2130 | 2378 | 1    | 2127 | 2255 | 2503 |  |
| cb10054_c49/f1p1/1123                                                                                               | gnl BL_ORD_ID 574 cb10054_c47/f1p0/1362                                                                             |     |      |      |      |      |      |      |      |  |
| isoform=cb10054_c49;full_length_coverage=1;non_full_length_coverage=1;isoform_length=1123;expected_accuracy=0.999   | isoform=cb10054_c47;full_length_coverage=1;non_full_length_coverage=0;isoform_length=1362;expected_accuracy=0.999   | 258 | 1123 | 3    | 262  | 439  | 1304 | 1    | 258  |  |

|                          |                                                                                                                                                                                         |     |      |      |      |      |          |      |          |  |
|--------------------------|-----------------------------------------------------------------------------------------------------------------------------------------------------------------------------------------|-----|------|------|------|------|----------|------|----------|--|
| uracy=1.000              | uracy=0.994                                                                                                                                                                             |     |      |      |      |      |          |      |          |  |
| cb8564_c87817/f1p0/3148  | gnl BL_ORD_ID 45447                      cb5340_c0/f1p0/3122<br>isoform=cb5340_c0;full_length_coverage=1;non_full_length_coverage=0;isoform_length=3122;expected_accuracy=0.996         | 103 | 2301 | 2300 | 3027 | 3069 | 869      | 754  | 27       |  |
| cb8564_c86614/f1p2/3276  | gnl BL_ORD_ID 18565                      cb8564_c92252/f1p1/3402<br>isoform=cb8564_c92252;full_length_coverage=1;non_full_length_coverage=1;isoform_length=3402;expected_accuracy=0.997 | 99  | 3168 | 1    | 103  | 333  | 340<br>2 | 11   | 113      |  |
| cb8564_c181853/f1p0/2119 | isoform=cb8564_c181853;full_length_coverage=1;non_full_length_coverage=0;isoform_length=2119;expected_accuracy=0.997                                                                    |     |      |      |      |      |          |      |          |  |
| cb8564_c181853/f1p0/2119 | gnl BL_ORD_ID 56722                      cb8564_c54360/f1p0/3040                                                                                                                        | 1   | 1339 | 1334 | 2106 | 1    | 134<br>1 | 2136 | 290<br>8 |  |
| cb8564_c181853/f1p0/2119 | isoform=cb8564_c181853;full_length_coverage=1;non_full_length_coverage=0;isoform_length=2119;expected_accuracy=0.997                                                                    |     |      |      |      |      |          |      |          |  |
| cb1027_c22/f4p1/3590     | gnl BL_ORD_ID 55433                      cb8564_c41572/f1p1/3265                                                                                                                        | 1   | 1339 | 1334 | 2119 | 1    | 133<br>4 | 2161 | 294<br>8 |  |
| cb1027_c22/f4p1/3590     | isoform=cb1027_c22;full_length_coverage=4;non_full_length_coverage=1;isoform_length=3590;expected_accuracy=0.999                                                                        |     |      |      |      |      |          |      |          |  |
| cb1027_c22/f4p1/3590     | gnl BL_ORD_ID 47239                      cb1027_c4/f1p0/4455                                                                                                                            | 126 | 3069 | 3068 | 3590 | 1    | 291<br>5 | 3827 | 434<br>1 |  |
| cb1545_c18/f1p0/3314     | gnl BL_ORD_ID 29255                      cb1545_c4/f3p0/3538<br>isoform=cb1545_c4;full_length_coverage=3;non_full_length_coverage=0;isoform_length=3538;expected_accuracy=0.998         | 1   | 1983 | 1982 | 3300 | 3    | 198<br>6 | 2233 | 353<br>8 |  |
| cb17424_c12/f1p1/1401    | gnl BL_ORD_ID 38807                      cb2733_c8/f1p1/1938                                                                                                                            | 112 | 1377 | 1    | 113  | 671  | 193      | 1    | 114      |  |



|                                                                                                                     |                                                                                                                      |      |      |      |      |      |      |      |     |   |
|---------------------------------------------------------------------------------------------------------------------|----------------------------------------------------------------------------------------------------------------------|------|------|------|------|------|------|------|-----|---|
|                                                                                                                     | isoform=cb2733_c8;full_length_coverage=1;non_full_length_coverage=1;isoform_length=1938;expected_accuracy=0.999      |      |      |      |      |      |      | 6    |     |   |
| cb8564_c46612/f1p1/3367                                                                                             | gnl BL_ORD_ID 58199 cb8564_c91279/f1p0/3567                                                                          | 509  | 2965 | 8    | 508  | 749  | 320  | 7    | 508 |   |
| cb716_c3/f3p1/1492                                                                                                  | gnl BL_ORD_ID 4081 cb716_c10/f1p1/1798                                                                               |      |      |      |      |      |      |      |     |   |
| isoform=cb716_c3;full_length_coverage=3;non_full_length_coverage=1;isoform_length=1492;expected_accuracy=1.000      | isoform=cb716_c10;full_length_coverage=1;non_full_length_coverage=1;isoform_length=1798;expected_accuracy=0.995      | 1    | 1172 | 1168 | 1492 | 4    | 1171 | 1474 | 179 | 8 |
| cb3586_c7/f1p0/2846                                                                                                 | gnl BL_ORD_ID 71356 cb3586_c9/f1p0/3463                                                                              | 300  | 2847 | 73   | 302  | 912  | 347  | 1    | 224 |   |
| cb8564_c121979/f1p0/2453                                                                                            | gnl BL_ORD_ID 52094 cb8564_c110646/f1p0/2764                                                                         | 1    | 1743 | 1740 | 2381 | 83   | 181  | 2110 | 275 | 1 |
| cb8564_c15996/f1p5/3083                                                                                             | gnl BL_ORD_ID 52057 cb8564_c11435/f1p1/3407                                                                          | 323  | 3083 | 4    | 328  | 482  | 324  | 18   | 341 |   |
| isoform=cb8564_c15996;full_length_coverage=1;non_full_length_coverage=5;isoform_length=3083;expected_accuracy=0.993 |                                                                                                                      |      |      |      |      |      |      |      |     |   |
| cb4128_c17/f1p0/2338                                                                                                | gnl BL_ORD_ID 40767 cb4128_c10/f3p1/2897                                                                             | 484  | 2272 | 5    | 487  | 1052 | 284  | 3    | 487 |   |
| isoform=cb4128_c10;full_length_coverage=3;non_full_length_coverage=1;isoform_length=2897;expected_accuracy=0.998    |                                                                                                                      |      |      |      |      |      |      |      |     |   |
| cb8564_c53418/f1p0/2602                                                                                             | gnl BL_ORD_ID 12811 cb8564_c162155/f1p6/2689                                                                         | 1163 | 2479 | 1    | 1168 | 1368 | 268  | 95   | 126 |   |
| isoform=cb8564_c53418;full_length_coverage=1;non_full_length_coverage=0;isoform_length=2602;expected_accuracy=0.991 | isoform=cb8564_c162155;full_length_coverage=1;non_full_length_coverage=6;isoform_length=2689;expected_accuracy=0.997 |      |      |      |      |      |      |      |     |   |
| cb8564_c38947/f1p0/2650                                                                                             | gnl BL_ORD_ID 55866 cb8564_c47522/f1p0/2954                                                                          | 1    | 1441 | 1436 | 2650 | 1    | 141  | 1635 | 284 |   |

|                                                                                                                     |                                                                                                                     |                         |     |      |      |      |      |      |      |      |
|---------------------------------------------------------------------------------------------------------------------|---------------------------------------------------------------------------------------------------------------------|-------------------------|-----|------|------|------|------|------|------|------|
| isoform=cb8564_c38947;full_length_coverage=1;non_full_length_coverage=0;isoform_length=2650;expected_accuracy=0.996 |                                                                                                                     |                         |     |      |      |      |      | 8    | 9    |      |
| cb8564_c43399/f1p0/2654                                                                                             | gnl BL_ORD_ID 17161                                                                                                 | cb8564_c87466/f1p1/3006 |     |      |      |      |      |      |      |      |
| isoform=cb8564_c43399;full_length_coverage=1;non_full_length_coverage=0;isoform_length=2654;expected_accuracy=0.999 | isoform=cb8564_c87466;full_length_coverage=1;non_full_length_coverage=1;isoform_length=3006;expected_accuracy=0.994 |                         | 1   | 2367 | 2363 | 2654 | 1    | 2383 | 2604 | 2901 |
| cb8564_c35607/f1p0/2587                                                                                             | gnl BL_ORD_ID 14314                                                                                                 | cb8564_c45827/f2p2/4435 |     |      |      |      |      |      |      |      |
| isoform=cb8564_c35607;full_length_coverage=1;non_full_length_coverage=0;isoform_length=2587;expected_accuracy=0.993 | isoform=cb8564_c45827;full_length_coverage=2;non_full_length_coverage=2;isoform_length=4435;expected_accuracy=0.999 |                         | 1   | 1685 | 1685 | 2587 | 1594 | 3275 | 3524 | 4428 |
| cb2101_c6/f1p0/2473                                                                                                 | gnl BL_ORD_ID 66714                                                                                                 | cb2101_c7/f1p0/2882     |     |      |      |      |      |      |      |      |
| isoform=cb2101_c6;full_length_coverage=1;non_full_length_coverage=0;isoform_length=2473;expected_accuracy=0.990     |                                                                                                                     |                         | 1   | 1937 | 1934 | 2473 | 1    | 1927 | 2209 | 2743 |
| cb12968_c7/f1p0/1320                                                                                                | gnl BL_ORD_ID 27058                                                                                                 | cb12968_c2/f1p0/1571    |     |      |      |      |      |      |      |      |
| isoform=cb12968_c7;full_length_coverage=1;non_full_length_coverage=0;isoform_length=1320;expected_accuracy=0.998    | isoform=cb12968_c2;full_length_coverage=1;non_full_length_coverage=0;isoform_length=1571;expected_accuracy=0.994    |                         | 157 | 1320 | 29   | 157  | 411  | 1571 | 1    | 123  |
| cb8564_c35607/f1p0/2587                                                                                             | gnl BL_ORD_ID 14293                                                                                                 | cb8564_c46212/f3p1/4373 |     |      |      |      |      |      |      |      |
| isoform=cb8564_c35607;full_length_coverage=1;non_full_length_coverage=0;isoform_length=2587;expected_accuracy=0.993 | isoform=cb8564_c46212;full_length_coverage=3;non_full_length_coverage=1;isoform_length=4373;expected_accuracy=0.999 |                         | 1   | 1685 | 1685 | 2587 | 1499 | 3180 | 3428 | 4328 |
| cb5304_c6/f1p0/2203                                                                                                 | gnl BL_ORD_ID 73763                                                                                                 | cb5304_c14/f1p0/2912    |     |      |      |      |      |      |      |      |
| isoform=cb5304_c6;full_length_coverage=1;non_full_length_coverage=0;isoform_length=2203;expected_accuracy=0.999     |                                                                                                                     |                         | 1   | 1509 | 1508 | 2203 | 310  | 1817 | 1932 | 2629 |

|                                                                                                                                                     |                                                                                                                                                                  |     |      |      |      |      |      |      |      |
|-----------------------------------------------------------------------------------------------------------------------------------------------------|------------------------------------------------------------------------------------------------------------------------------------------------------------------|-----|------|------|------|------|------|------|------|
| acy=0.997<br>cb6090_c0/f5p0/2362<br>isoform=cb6090_c0;full_length_coverage=5;non_full_length_coverage=0;isoform_length=2362;expected_accuracy=1.000 | gnl BL_ORD_ID 73488 cb6090_c3/f1p0/2843                                                                                                                          | 1   | 1688 | 1689 | 2361 | 1    | 1694 | 2179 | 2862 |
| cb658_c9/f1p1/2605<br>isoform=cb658_c9;full_length_coverage=1;non_full_length_coverage=1;isoform_length=2605;expected_accuracy=0.997                | gnl BL_ORD_ID 4084 cb658_c10/f1p1/6427<br>isoform=cb658_c10;full_length_coverage=1;non_full_length_coverage=1;isoform_length=6427;expected_accuracy=0.993        | 1   | 1286 | 1286 | 2577 | 2577 | 3862 | 5144 | 6427 |
| cb454_c1/f3p0/2382<br>isoform=cb454_c1;full_length_coverage=3;non_full_length_coverage=0;isoform_length=2382;expected_accuracy=1.000                | gnl BL_ORD_ID 72202 cb454_c35/f1p0/2896                                                                                                                          | 1   | 1422 | 1426 | 2348 | 27   | 1436 | 1798 | 2718 |
| cb8564_c132795/f5p10/3729<br>isoform=cb8564_c132795;full_length_coverage=5;non_full_length_coverage=10;isoform_length=3729;expected_accuracy=0.999  | gnl BL_ORD_ID 16247 cb8564_c5117/f1p0/4873<br>isoform=cb8564_c5117;full_length_coverage=1;non_full_length_coverage=0;isoform_length=4873;expected_accuracy=0.999 | 1   | 1832 | 1830 | 3619 | 82   | 1921 | 3088 | 4873 |
| cb1406_c5/f1p0/2334<br>isoform=cb1406_c5;full_length_coverage=1;non_full_length_coverage=0;isoform_length=2334;expected_accuracy=0.996              | gnl BL_ORD_ID 27455 cb1406_c0/f2p1/5413<br>isoform=cb1406_c0;full_length_coverage=2;non_full_length_coverage=1;isoform_length=5413;expected_accuracy=0.999       | 214 | 2334 | 1    | 218  | 3268 | 5393 | 13   | 228  |
| cb3856_c0/f2p1/1619<br>isoform=cb3856_c0;full_length_coverage=2;non_full_length_coverage=1;isoform_length=1619;expected_accuracy=0.996              | gnl BL_ORD_ID 71563 cb3856_c6/f1p0/1906                                                                                                                          | 130 | 1619 | 1    | 131  | 363  | 1853 | 1    | 134  |
| cb3999_c22/f1p0/2445                                                                                                                                | gnl BL_ORD_ID 41057 cb3999_c13/f1p0/2693                                                                                                                         | 1   | 1868 | 1868 | 2445 | 1    | 186  | 2020 | 259  |

|                                                                                                                                                |                                                                                                                                                                                                                   |     |      |      |      |      |          |      |          |
|------------------------------------------------------------------------------------------------------------------------------------------------|-------------------------------------------------------------------------------------------------------------------------------------------------------------------------------------------------------------------|-----|------|------|------|------|----------|------|----------|
| isoform=cb3999_c22;full_length_coverage=1;non_full_length_coverage=0;isoform_length=2445;expected_accuracy=0.998<br>cb8564_c18907/f1p2/4138    | isoform=cb3999_c13;full_length_coverage=1;non_full_length_coverage=0;isoform_length=2693;expected_accuracy=1.000                                                                                                  |     |      |      |      |      |          | 8    | 8        |
| isoform=cb8564_c18907;full_length_coverage=1;non_full_length_coverage=2;isoform_length=4138;expected_accuracy=0.996<br>cb2640_c18/f1p0/3205    | gnl BL_ORD_ID 64186 cb14630_c30/f1p0/5869                                                                                                                                                                         | 363 | 4138 | 1    | 367  | 1879 | 565<br>5 | 1    | 367      |
| isoform=cb2640_c18;full_length_coverage=1;non_full_length_coverage=0;isoform_length=3205;expected_accuracy=0.991<br>cb8564_c70307/f2p0/3222    | gnl BL_ORD_ID 68659 cb2640_c11/f1p0/3319                                                                                                                                                                          | 188 | 3072 | 1    | 189  | 459  | 333<br>1 | 37   | 225      |
| isoform=cb8564_c70307;full_length_coverage=2;non_full_length_coverage=0;isoform_length=3222;expected_accuracy=0.999<br>cb8564_c36011/f1p0/3015 | gnl BL_ORD_ID 56330 cb8564_c74576/f1p0/4386                                                                                                                                                                       | 1   | 2253 | 2253 | 3187 | 200  | 245<br>2 | 3000 | 393<br>8 |
| cb3586_c10/f1p0/2722                                                                                                                           | gnl BL_ORD_ID 56381 cb8564_c75626/f1p2/3199                                                                                                                                                                       | 10  | 2128 | 2126 | 2675 | 12   | 2116     | 2611 | 316<br>0 |
| isoform=cb3586_c10;full_length_coverage=1;non_full_length_coverage=0;isoform_length=2722;expected_accuracy=0.993<br>cb8564_c22636/f1p0/2704    | gnl BL_ORD_ID 71356 cb3586_c9/f1p0/3463                                                                                                                                                                           | 252 | 2722 | 1    | 252  | 914  | 338<br>6 | 25   | 280      |
| isoform=cb8564_c22636;full_length_coverage=1;non_full_length_coverage=0;isoform_length=2704;expected_accuracy=0.994<br>cb293_c6/f1p0/3758      | gnl BL_ORD_ID 13678      cb8564_c22279/f1p0/2983<br>isoform=cb8564_c22279;full_length_coverage=1;non_full_length_coverage=0;isoform_length=2983;expected_accuracy=0.997<br>gnl BL_ORD_ID 69536 cb293_c7/f1p0/4528 | 1   | 2092 | 2093 | 2704 | 1    | 209<br>5 | 2214 | 282<br>6 |
|                                                                                                                                                |                                                                                                                                                                                                                   | 1   | 1906 | 1903 | 3742 | 10   | 191      | 2645 | 445      |

|                                                                                                                                      |                                                                                                                                                                           |      |      |      |      |      |          |      |          |
|--------------------------------------------------------------------------------------------------------------------------------------|---------------------------------------------------------------------------------------------------------------------------------------------------------------------------|------|------|------|------|------|----------|------|----------|
| isoform=cb293_c6;full_length_coverage=1;non_full_length_coverage=0;isoform_length=3758;expected_accuracy=0.997                       |                                                                                                                                                                           |      |      |      |      |      |          | 9    | 6        |
| cb12513_c86/f1p1/1373                                                                                                                | gnl BL_ORD_ID 14254      cb8564_c3885/f1p7/2735<br>isoform=cb8564_c3885;full_length_coverage=1;non_full_length_coverage=7;isoform_length=2735;expected_accuracy=0.999     | 311  | 1363 | 55   | 312  | 1490 | 254<br>2 | 17   | 274      |
| cb12714_c29/f1p2/1583                                                                                                                | gnl BL_ORD_ID 52063      cb8564_c11680/f1p1/3676                                                                                                                          | 1    | 1296 | 1293 | 1591 | 22   | 131<br>7 | 3174 | 347<br>1 |
| cb141_c1/f3p0/3564<br>isoform=cb141_c1;full_length_coverage=3;non_full_length_coverage=0;isoform_length=3564;expected_accuracy=1.000 | gnl BL_ORD_ID 61123      cb141_c3/f1p0/4274                                                                                                                               | 1647 | 3564 | 1    | 1649 | 2388 | 430<br>5 | 18   | 167<br>0 |
| cb8564_c72349/f1p0/3248                                                                                                              | gnl BL_ORD_ID 12934      cb8564_c164095/f2p4/3350<br>isoform=cb8564_c164095;full_length_coverage=2;non_full_length_coverage=4;isoform_length=3350;expected_accuracy=0.995 | 1    | 2662 | 2659 | 3068 | 97   | 277<br>9 | 2938 | 335<br>0 |
| cb1312_c24/f1p0/3018                                                                                                                 | gnl BL_ORD_ID 26440      cb1312_c40/f1p1/3867<br>isoform=cb1312_c40;full_length_coverage=1;non_full_length_coverage=1;isoform_length=3867;expected_accuracy=0.996         | 1    | 1532 | 1531 | 2888 | 144  | 166<br>9 | 2476 | 382<br>7 |
| cb8564_c23232/f1p3/2540                                                                                                              | gnl BL_ORD_ID 13302      cb8564_c19160/f1p2/2687<br>isoform=cb8564_c19160;full_length_coverage=1;non_full_length_coverage=2;isoform_length=2687;expected_accuracy=0.990   | 16   | 2172 | 2167 | 2518 | 5    | 219<br>0 | 2292 | 264<br>3 |
| cb1528_c3/f1p0/2290                                                                                                                  | gnl BL_ORD_ID 63716      cb1528_c4/f1p0/3332                                                                                                                              | 97   | 2295 | 1    | 100  | 1084 | 329      | 1    | 100      |

|                                                                                                                     |                                                                                                                     |                         |     |      |      |      |      |      |      |      |
|---------------------------------------------------------------------------------------------------------------------|---------------------------------------------------------------------------------------------------------------------|-------------------------|-----|------|------|------|------|------|------|------|
| cb4528_c38/f2p0/1640                                                                                                | gnl BL_ORD_ID 42120                                                                                                 | cb4528_c39/f1p0/2046    |     |      |      |      |      | 6    |      |      |
| isoform=cb4528_c38;full_length_coverage=2;non_full_length_coverage=0;isoform_length=1640;expected_accuracy=1.000    | isoform=cb4528_c39;full_length_coverage=1;non_full_length_coverage=0;isoform_length=2046;expected_accuracy=0.995    |                         | 1   | 1497 | 1495 | 1639 | 99   | 159  | 1903 | 204  |
|                                                                                                                     |                                                                                                                     |                         |     |      |      |      |      | 5    |      | 6    |
| cb12685_c3/f1p2/1466                                                                                                | gnl BL_ORD_ID 13277                                                                                                 | cb8564_c23063/f1p2/2963 |     |      |      |      |      |      |      |      |
|                                                                                                                     | isoform=cb8564_c23063;full_length_coverage=1;non_full_length_coverage=2;isoform_length=2963;expected_accuracy=0.996 |                         | 1   | 1294 | 1292 | 1463 | 8    | 130  | 2792 | 295  |
|                                                                                                                     |                                                                                                                     |                         |     |      |      |      |      | 3    |      | 9    |
| cb1178_c21/f1p0/1378                                                                                                | gnl BL_ORD_ID 23778                                                                                                 | cb1178_c16/f1p0/1671    |     |      |      |      |      |      |      |      |
|                                                                                                                     | isoform=cb1178_c16;full_length_coverage=1;non_full_length_coverage=0;isoform_length=1671;expected_accuracy=0.993    |                         | 105 | 1380 | 1    | 104  | 223  | 150  | 1    | 103  |
|                                                                                                                     |                                                                                                                     |                         |     |      |      |      |      | 4    |      |      |
| cb8564_c40764/f1p0/2563                                                                                             | gnl BL_ORD_ID 56623                                                                                                 | cb8564_c49310/f1p2/3045 |     |      |      |      |      |      |      |      |
| isoform=cb8564_c40764;full_length_coverage=1;non_full_length_coverage=0;isoform_length=2563;expected_accuracy=0.997 |                                                                                                                     |                         | 19  | 2167 | 2162 | 2563 | 65   | 2211 | 2418 | 281  |
|                                                                                                                     |                                                                                                                     |                         |     |      |      |      |      |      |      | 9    |
| cb12292_c22/f1p0/1010                                                                                               | gnl BL_ORD_ID 23626                                                                                                 | cb12292_c9/f1p0/1677    |     |      |      |      |      |      |      |      |
|                                                                                                                     | isoform=cb12292_c9;full_length_coverage=1;non_full_length_coverage=0;isoform_length=1677;expected_accuracy=0.995    |                         | 159 | 1006 | 8    | 155  | 816  | 166  | 1    | 145  |
|                                                                                                                     |                                                                                                                     |                         |     |      |      |      |      | 2    |      |      |
| cb8564_c2392/f1p2/2510                                                                                              | gnl BL_ORD_ID 13231                                                                                                 | cb8564_c2282/f1p1/3052  |     |      |      |      |      |      |      |      |
| isoform=cb8564_c2392;full_length_coverage=1;non_full_length_coverage=2;isoform_length=2510;expected_accuracy=0.992  | isoform=cb8564_c2282;full_length_coverage=1;non_full_length_coverage=1;isoform_length=3052;expected_accuracy=0.995  |                         | 707 | 2510 | 8    | 709  | 1259 | 304  | 2    | 691  |
|                                                                                                                     |                                                                                                                     |                         |     |      |      |      |      | 6    |      |      |
| cb8564_c71532/f1p0/3010                                                                                             | gnl BL_ORD_ID 17929                                                                                                 | cb8564_c88718/f1p0/4453 |     |      |      |      |      |      |      |      |
|                                                                                                                     |                                                                                                                     |                         | 18  | 2515 | 2514 | 3010 | 1    | 247  | 2636 | 3112 |

|                                                                                                                     |                                                                                                                                                                           |      |      |      |      |      |     |      |     |   |  |  |
|---------------------------------------------------------------------------------------------------------------------|---------------------------------------------------------------------------------------------------------------------------------------------------------------------------|------|------|------|------|------|-----|------|-----|---|--|--|
| isoform=cb8564_c71532;full_length_coverage=1;non_full_length_coverage=0;isoform_length=3010;expected_accuracy=0.995 | isoform=cb8564_c88718;full_length_coverage=1;non_full_length_coverage=0;isoform_length=4453;expected_accuracy=0.997                                                       |      |      |      |      |      |     |      |     | 9 |  |  |
| cb8564_c70133/f1p0/2881                                                                                             | gnl BL_ORD_ID 16978      cb8564_c74124/f1p0/3022<br>isoform=cb8564_c74124;full_length_coverage=1;non_full_length_coverage=0;isoform_length=3022;expected_accuracy=0.999   | 1    | 1940 | 1941 | 2807 | 21   | 198 | 2157 | 302 |   |  |  |
| cb8564_c111147/f1p0/3741                                                                                            | gnl BL_ORD_ID 12399      cb8564_c128675/f2p0/3892<br>isoform=cb8564_c128675;full_length_coverage=2;non_full_length_coverage=0;isoform_length=3892;expected_accuracy=0.997 | 694  | 3722 | 9    | 696  | 858  | 389 | 1    | 687 |   |  |  |
| cb12_c37/f1p0/4067                                                                                                  | gnl BL_ORD_ID 61087      cb12_c40/f1p0/4680                                                                                                                               | 286  | 4080 | 186  | 288  | 702  | 449 | 470  | 572 |   |  |  |
| cb8564_c42409/f1p0/3007                                                                                             | gnl BL_ORD_ID 16705      cb8564_c53880/f1p0/3484<br>isoform=cb8564_c53880;full_length_coverage=1;non_full_length_coverage=0;isoform_length=3484;expected_accuracy=0.996   | 1089 | 2899 | 107  | 1090 | 1672 | 348 | 75   | 105 |   |  |  |
| cb3566_c0/f2p1/1967                                                                                                 | gnl BL_ORD_ID 40310      cb3566_c1/f1p1/3588<br>isoform=cb3566_c0;full_length_coverage=2;non_full_length_coverage=1;isoform_length=1967;expected_accuracy=0.996           | 1    | 1433 | 1428 | 1967 | 1    | 142 | 2997 | 353 |   |  |  |
| cb7100_c0/f1p0/2696                                                                                                 | gnl BL_ORD_ID 3725      cb7100_c1/f1p0/2838<br>isoform=cb7100_c0;full_length_coverage=1;non_full_length_coverage=0;isoform_length=2696;expected_accuracy=0.993            | 1    | 2188 | 2186 | 2693 | 10   | 219 | 2329 | 283 |   |  |  |
| cb8564_c1159/f1p1/2210                                                                                              | gnl BL_ORD_ID 12031      cb8564_c146119/f9p4/2560                                                                                                                         | 1004 | 2210 | 1    | 1005 | 1330 | 253 | 25   | 103 |   |  |  |

|                                                                                                                                              |                                                                                                                                                                                     |      |      |      |      |      |      |      |      |
|----------------------------------------------------------------------------------------------------------------------------------------------|-------------------------------------------------------------------------------------------------------------------------------------------------------------------------------------|------|------|------|------|------|------|------|------|
| isoform=cb8564_c1159;full_length_coverage=1;non_full_length_coverage=1;isoform_length=2210;expected_accuracy=0.993<br>cb233_c13/f1p0/2651    | isoform=cb8564_c146119;full_length_coverage=9;non_full_length_coverage=4;isoform_length=2560;expected_accuracy=1.000<br>gnl BL_ORD_ID 38488                      cb233_c5/f2p0/2943 |      |      |      |      |      | 5    |      | 2    |
| isoform=cb233_c13;full_length_coverage=1;non_full_length_coverage=0;isoform_length=2651;expected_accuracy=0.992<br>cb946_c11/f1p0/3138       | isoform=cb233_c5;full_length_coverage=2;non_full_length_coverage=0;isoform_length=2943;expected_accuracy=1.000<br>gnl BL_ORD_ID 19593                      cb946_c0/f2p0/3227       | 377  | 2600 | 4    | 382  | 694  | 2943 | 36   | 418  |
| isoform=cb946_c11;full_length_coverage=1;non_full_length_coverage=0;isoform_length=3138;expected_accuracy=1.000<br>cb8637_c58/f1p0/1789      | isoform=cb946_c0;full_length_coverage=2;non_full_length_coverage=0;isoform_length=3227;expected_accuracy=0.992<br>gnl BL_ORD_ID 18077                      cb8637_c32/f18p0/2009    | 1004 | 3099 | 1    | 1004 | 1126 | 3227 | 12   | 1015 |
| isoform=cb8637_c58;full_length_coverage=1;non_full_length_coverage=0;isoform_length=1789;expected_accuracy=0.990<br>cb3838_c13/f1p0/3157     | isoform=cb8637_c32;full_length_coverage=18;non_full_length_coverage=0;isoform_length=2009;expected_accuracy=1.000<br>gnl BL_ORD_ID 70647                      cb3838_c5/f1p0/4926   | 1    | 1332 | 1332 | 1789 | 101  | 1432 | 1535 | 1992 |
| isoform=cb3838_c13;full_length_coverage=1;non_full_length_coverage=0;isoform_length=3157;expected_accuracy=0.993<br>cb8564_c150120/f1p3/2376 | isoform=cb3838_c5;full_length_coverage=1;non_full_length_coverage=0;isoform_length=4926;expected_accuracy=0.993<br>gnl BL_ORD_ID 13919                      cb8564_c36044/f1p1/2509 | 1013 | 3140 | 1    | 1013 | 1818 | 3949 | 3    | 1026 |
| isoform=cb8564_c150120;full_length_coverage=1;non_full_length_coverage=3;isoform_length=2376;expected_accuracy=1.000<br>cb541_c24/f1p0/5418  | isoform=cb8564_c36044;full_length_coverage=1;non_full_length_coverage=1;isoform_length=2509;expected_accuracy=0.995<br>gnl BL_ORD_ID 44620                      cb541_c26/f1p1/5713 | 1    | 2130 | 2127 | 2376 | 7    | 2139 | 2261 | 2509 |
| isoform=cb541_c24;full_length_coverage=1;non_full_length_coverage=0;isoform_length=5418;expected_accuracy=0.993                              | isoform=cb541_c26;full_length_coverage=1;non_full_length_coverage=1;isoform_length=5713;expected_accuracy=0.993                                                                     | 2    | 4102 | 4103 | 5418 | 1    | 4119 | 4249 | 5571 |



|                                                                                                                                                     |                                                                                                                                                                           |      |      |      |      |      |          |      |          |
|-----------------------------------------------------------------------------------------------------------------------------------------------------|---------------------------------------------------------------------------------------------------------------------------------------------------------------------------|------|------|------|------|------|----------|------|----------|
| acy=0.993<br>cb3898_c0/f8p1/2602<br>isoform=cb3898_c0;full_length_coverage=8;non_full_length_coverage=1;isoform_length=2602;expected_accuracy=1.000 | cy=0.997<br>gnl BL_ORD_ID 70677 cb3898_c7/f1p0/3325                                                                                                                       | 1288 | 2602 | 1    | 1289 | 1487 | 280<br>1 | 22   | 130<br>6 |
| cb4016_c34/f1p0/2560<br>isoform=cb4016_c34;full_length_coverage=1;non_full_length_coverage=0;isoform_length=2560;expected_accuracy=0.998            | gnl BL_ORD_ID 71728 cb4016_c38/f1p0/2815                                                                                                                                  | 1264 | 2560 | 12   | 1266 | 1380 | 267<br>5 | 7    | 125<br>9 |
| cb8564_c116509/f1p0/3009                                                                                                                            | gnl BL_ORD_ID 11519      cb8564_c146513/f2p1/3281<br>isoform=cb8564_c146513;full_length_coverage=2;non_full_length_coverage=1;isoform_length=3281;expected_accuracy=0.997 | 1    | 2016 | 2015 | 2985 | 61   | 207<br>7 | 2301 | 327<br>6 |
| cb8564_c844/f2p0/2586<br>isoform=cb8564_c844;full_length_coverage=2;non_full_length_coverage=0;isoform_length=2586;expected_accuracy=1.000          | gnl BL_ORD_ID 14165      cb8564_c3674/f1p0/3030<br>isoform=cb8564_c3674;full_length_coverage=1;non_full_length_coverage=0;isoform_length=3030;expected_accuracy=0.996     | 1    | 2343 | 2344 | 2586 | 310  | 265<br>4 | 2768 | 301<br>0 |
| cb373_c29/f1p0/4336                                                                                                                                 | gnl BL_ORD_ID 70842 cb373_c46/f1p0/6511                                                                                                                                   | 1    | 3532 | 3532 | 3924 | 412  | 393<br>8 | 4473 | 486<br>4 |
| cb6802_c57/f1p0/2631                                                                                                                                | gnl BL_ORD_ID 4195      cb6802_c5/f2p0/2683<br>isoform=cb6802_c5;full_length_coverage=2;non_full_length_coverage=0;isoform_length=2683;expected_accuracy=0.998            | 191  | 2236 | 1    | 192  | 343  | 237<br>9 | 29   | 218      |
| cb8564_c36689/f1p1/2368<br>isoform=cb8564_c36689;full_length_coverage=1;non_full_length_coverage=1;isoform_length=2368;expected_                    | gnl BL_ORD_ID 56602 cb8564_c48192/f1p6/3029                                                                                                                               | 1    | 1709 | 1706 | 2368 | 1    | 170<br>5 | 2204 | 286<br>7 |

|                                                                                                                 |                                                                                                                    |                        |     |      |      |      |      |      |      |      |
|-----------------------------------------------------------------------------------------------------------------|--------------------------------------------------------------------------------------------------------------------|------------------------|-----|------|------|------|------|------|------|------|
| accuracy=0.991                                                                                                  |                                                                                                                    |                        |     |      |      |      |      |      |      |      |
| cb280_c71/f1p0/3805                                                                                             | gnl BL_ORD_ID 36868                                                                                                | cb280_c70/f1p0/4034    |     |      |      |      |      |      |      |      |
| isoform=cb280_c71;full_length_coverage=1;non_full_length_coverage=0;isoform_length=3805;expected_accuracy=0.994 | isoform=cb280_c70;full_length_coverage=1;non_full_length_coverage=0;isoform_length=4034;expected_accuracy=0.996    |                        | 1   | 3085 | 3085 | 3805 | 17   | 3105 | 3310 | 4033 |
| cb1956_c12/f1p0/3120                                                                                            | gnl BL_ORD_ID 66543                                                                                                | cb1956_c24/f1p0/3428   | 124 | 2714 | 2714 | 3138 | 2    | 2593 | 2732 | 3156 |
|                                                                                                                 | gnl BL_ORD_ID 39618                                                                                                | cb3307_c26/f1p2/2430   |     |      |      |      |      |      |      |      |
| cb14060_c0/f1p1/1332                                                                                            | isoform=cb3307_c26;full_length_coverage=1;non_full_length_coverage=2;isoform_length=2430;expected_accuracy=0.997   |                        | 150 | 1331 | 5    | 153  | 1248 | 2429 | 9    | 157  |
| cb7650_c9/f2p0/2154                                                                                             | gnl BL_ORD_ID 8847                                                                                                 | cb7650_c5/f1p0/2571    |     |      |      |      |      |      |      |      |
| isoform=cb7650_c9;full_length_coverage=2;non_full_length_coverage=0;isoform_length=2154;expected_accuracy=0.998 | isoform=cb7650_c5;full_length_coverage=1;non_full_length_coverage=0;isoform_length=2571;expected_accuracy=0.998    |                        | 603 | 2154 | 67   | 604  | 997  | 2547 | 26   | 563  |
|                                                                                                                 | gnl BL_ORD_ID 19169                                                                                                | cb8564_c9750/f2p0/3506 |     |      |      |      |      |      |      |      |
| cb8564_c14116/f1p0/2968                                                                                         | isoform=cb8564_c9750;full_length_coverage=2;non_full_length_coverage=0;isoform_length=3506;expected_accuracy=0.994 |                        | 664 | 2869 | 9    | 667  | 1296 | 3506 | 1    | 658  |
|                                                                                                                 | gnl BL_ORD_ID 14176                                                                                                | cb8564_c4538/f2p0/2766 |     |      |      |      |      |      |      |      |
| cb8564_c4546/f2p0/2151                                                                                          | isoform=cb8564_c4538;full_length_coverage=2;non_full_length_coverage=0;isoform_length=2766;expected_accuracy=0.994 |                        | 11  | 1438 | 1436 | 2158 | 3    | 1430 | 2048 | 2766 |
|                                                                                                                 | gnl BL_ORD_ID 21527                                                                                                | cb9604_c2/f2p0/1950    |     |      |      |      |      |      |      |      |
| cb9604_c7/f1p0/1887                                                                                             | isoform=cb9604_c2;full_length_coverage=2;non_full_length_coverage=0;isoform_length=1950;expected_accuracy=0.994    |                        | 202 | 1802 | 25   | 200  | 299  | 1897 | 1    | 157  |

|                                                                                                                                          |                                                                                                                                                                                           |     |      |      |      |      |      |      |      |  |
|------------------------------------------------------------------------------------------------------------------------------------------|-------------------------------------------------------------------------------------------------------------------------------------------------------------------------------------------|-----|------|------|------|------|------|------|------|--|
|                                                                                                                                          | cy=0.994                                                                                                                                                                                  |     |      |      |      |      |      |      |      |  |
| cb6904_c0/f24p4/1884<br>isoform=cb6904_c0;full_length_coverage=24;non_full_length_coverage=4;isoform_length=1884;expected_accuracy=1.000 | gnl BL_ORD_ID 47756 cb6904_c9/f1p1/2839                                                                                                                                                   | 393 | 1884 | 75   | 395  | 1328 | 2819 | 1    | 318  |  |
| cb3586_c13/f1p0/3140                                                                                                                     | gnl BL_ORD_ID 71356 cb3586_c9/f1p0/3463                                                                                                                                                   | 314 | 2935 | 73   | 314  | 765  | 3386 | 10   | 250  |  |
| cb6204_c6/f1p1/2162<br>isoform=cb6204_c6;full_length_coverage=1;non_full_length_coverage=1;isoform_length=2162;expected_accuracy=1.000   | gnl BL_ORD_ID 4939                      cb6204_c0/f24p2/2501<br>isoform=cb6204_c0;full_length_coverage=24;non_full_length_coverage=2;isoform_length=2501;expected_accuracy=1.000          | 1   | 1249 | 1244 | 2162 | 1    | 1248 | 1574 | 2492 |  |
| cb8564_c20918/f2p2/2484                                                                                                                  | gnl BL_ORD_ID 13115                      cb8564_c16916/f7p1/3034<br>isoform=cb8564_c16916;full_length_coverage=7;non_full_length_coverage=1;isoform_length=3034;expected_accuracy=0.996   | 1   | 1497 | 1495 | 2453 | 146  | 1646 | 1853 | 2811 |  |
| cb5891_c11/f1p0/2563                                                                                                                     | gnl BL_ORD_ID 46310                      cb5891_c10/f1p0/2609<br>isoform=cb5891_c10;full_length_coverage=1;non_full_length_coverage=0;isoform_length=2609;expected_accuracy=0.995         | 201 | 2520 | 1    | 200  | 308  | 2604 | 5    | 204  |  |
| cb8564_c111706/f1p0/2253                                                                                                                 | gnl BL_ORD_ID 10848                      cb8564_c112467/f1p0/3061<br>isoform=cb8564_c112467;full_length_coverage=1;non_full_length_coverage=0;isoform_length=3061;expected_accuracy=0.994 | 1   | 1681 | 1678 | 2122 | 2    | 1655 | 2617 | 3061 |  |
| cb8564_c38947/f1p0/2650<br>isoform=cb8564_c38947;full_length_coverage=1;non_full_length_coverage=0;isoform_length=2650;expected_         | gnl BL_ORD_ID 17161                      cb8564_c87466/f1p1/3006<br>isoform=cb8564_c87466;full_length_coverage=1;non_full_length_coverage=1;isoform_length=3006;expected_ac               | 1   | 1441 | 1436 | 2650 | 1    | 1452 | 1671 | 2900 |  |

|                                                                                                                      |                                                                                                                      |     |      |      |      |      |      |      |      |  |
|----------------------------------------------------------------------------------------------------------------------|----------------------------------------------------------------------------------------------------------------------|-----|------|------|------|------|------|------|------|--|
| accuracy=0.996                                                                                                       | curacy=0.994                                                                                                         |     |      |      |      |      |      |      |      |  |
| cb1525_c7/f1p0/3162                                                                                                  |                                                                                                                      |     |      |      |      |      |      |      |      |  |
| isoform=cb1525_c7;full_length_coverage=1;non_full_length_coverage=0;isoform_length=3162;expected_accuracy=0.995      | gnl BL_ORD_ID 63714 cb1525_c28/f1p1/5628                                                                             | 149 | 3162 | 1    | 149  | 807  | 3829 | 56   | 204  |  |
| cb5415_c2/f2p1/1400                                                                                                  | gnl BL_ORD_ID 46428 cb5415_c1/f2p0/2456                                                                              |     |      |      |      |      |      |      |      |  |
| isoform=cb5415_c2;full_length_coverage=2;non_full_length_coverage=1;isoform_length=1400;expected_accuracy=0.999      | isoform=cb5415_c1;full_length_coverage=2;non_full_length_coverage=0;isoform_length=2456;expected_accuracy=0.995      | 478 | 1400 | 50   | 480  | 1529 | 2455 | 35   | 469  |  |
| cb2981_c2/f1p1/3260                                                                                                  | gnl BL_ORD_ID 38098 cb2981_c1/f1p0/3757                                                                              |     |      |      |      |      |      |      |      |  |
| isoform=cb2981_c2;full_length_coverage=1;non_full_length_coverage=1;isoform_length=3260;expected_accuracy=0.997      | isoform=cb2981_c1;full_length_coverage=1;non_full_length_coverage=0;isoform_length=3757;expected_accuracy=0.997      | 1   | 2519 | 2516 | 3162 | 245  | 2765 | 3112 | 3757 |  |
| cb5183_c115/f1p0/1016                                                                                                | gnl BL_ORD_ID 73598 cb5183_c50/f1p0/1765                                                                             | 326 | 1016 | 7    | 330  | 938  | 1629 | 6    | 329  |  |
| cb5697_c0/f4p1/2117                                                                                                  | gnl BL_ORD_ID 46177 cb5697_c2/f3p0/3035                                                                              |     |      |      |      |      |      |      |      |  |
| isoform=cb5697_c0;full_length_coverage=4;non_full_length_coverage=1;isoform_length=2117;expected_accuracy=1.000      | isoform=cb5697_c2;full_length_coverage=3;non_full_length_coverage=0;isoform_length=3035;expected_accuracy=0.998      | 1   | 1169 | 1170 | 2117 | 1    | 1169 | 2083 | 3031 |  |
| cb8564_c182028/f1p0/2513                                                                                             | gnl BL_ORD_ID 16052 cb8564_c69457/f3p14/2821                                                                         |     |      |      |      |      |      |      |      |  |
| isoform=cb8564_c182028;full_length_coverage=1;non_full_length_coverage=0;isoform_length=2513;expected_accuracy=0.996 | isoform=cb8564_c69457;full_length_coverage=3;non_full_length_coverage=14;isoform_length=2821;expected_accuracy=0.997 | 1   | 1971 | 1968 | 2513 | 1    | 1970 | 2114 | 2659 |  |
| cb8564_c18491/f2p0/4707                                                                                              | gnl BL_ORD_ID 67917 cb18654_c10/f1p0/5700                                                                            |     |      |      |      |      |      |      |      |  |
| isoform=cb8564_c18491;full_length_coverage=2;non_full_length_coverage=0;isoform_length=4707;expected_                |                                                                                                                      | 1   | 4067 | 4068 | 4707 | 815  | 4886 | 5111 | 5750 |  |



|                                                                                                                                                |                                                                                                                                                                         |     |      |      |      |      |      |      |      |  |
|------------------------------------------------------------------------------------------------------------------------------------------------|-------------------------------------------------------------------------------------------------------------------------------------------------------------------------|-----|------|------|------|------|------|------|------|--|
| isoform=cb3636_c48;full_length_coverage=4;non_full_length_coverage=1;isoform_length=2561;expected_accuracy=1.000<br>cb8564_c51923/f1p1/2966    | isoform=cb3636_c38;full_length_coverage=1;non_full_length_coverage=1;isoform_length=2658;expected_accuracy=0.999<br>gnl BL_ORD_ID 17429      cb8564_c85447/f1p0/3196    |     |      |      |      |      |      | 8    |      |  |
| isoform=cb8564_c51923;full_length_coverage=1;non_full_length_coverage=1;isoform_length=2966;expected_accuracy=0.997<br>cb8564_c36731/f1p2/2761 | isoform=cb8564_c85447;full_length_coverage=1;non_full_length_coverage=0;isoform_length=3196;expected_accuracy=0.997<br>gnl BL_ORD_ID 56764      cb8564_c70795/f1p0/3769 | 1   | 2431 | 2430 | 2966 | 3    | 2413 | 2660 | 3196 |  |
| cb8564_c42316/f1p0/2699                                                                                                                        | isoform=cb8564_c42316;full_length_coverage=1;non_full_length_coverage=0;isoform_length=2699;expected_accuracy=0.992<br>gnl BL_ORD_ID 55265      cb8564_c36918/f1p0/3534 | 18  | 1976 | 1972 | 2738 | 34   | 1994 | 2424 | 3187 |  |
| cb8564_c17694/f1p1/3299                                                                                                                        | isoform=cb16355_c13;full_length_coverage=1;non_full_length_coverage=3;isoform_length=5303;expected_accuracy=0.992<br>gnl BL_ORD_ID 32014      cb16355_c13/f1p3/5303     | 178 | 2699 | 13   | 177  | 626  | 3147 | 1    | 168  |  |
| cb8564_c35088/f1p0/3430                                                                                                                        | isoform=cb16355_c13;full_length_coverage=1;non_full_length_coverage=3;isoform_length=5303;expected_accuracy=0.992<br>gnl BL_ORD_ID 32014      cb16355_c13/f1p3/5303     | 1   | 2347 | 2347 | 3356 | 1720 | 4066 | 4294 | 5300 |  |
| isoform=cb8564_c35088;full_length_coverage=1;non_full_length_coverage=0;isoform_length=3430;expected_accuracy=0.991<br>cb7222_c6/f1p0/2441     | gnl BL_ORD_ID 52067      cb8564_c11914/f1p0/3554                                                                                                                        | 1   | 2060 | 2058 | 3430 | 1    | 2048 | 2158 | 3546 |  |
| cb8564_c71802/f1p1/3657                                                                                                                        | gnl BL_ORD_ID 50431      cb7222_c3/f1p0/2643                                                                                                                            | 399 | 2312 | 56   | 404  | 650  | 2563 | 1    | 348  |  |
| isoform=cb8564_c71802;full_length_coverage=1;non_full_length_coverage=1;isoform_length=3657;expected_accuracy=0.997<br>cb8564_c68923/f2p2/3765 | isoform=cb8564_c68923;full_length_coverage=2;non_full_length_coverage=2;isoform_length=3765;expected_accuracy=0.997<br>gnl BL_ORD_ID 16562      cb8564_c68923/f2p2/3765 | 188 | 3574 | 1    | 191  | 379  | 3765 | 37   | 231  |  |

|                                                                                                                                                                  |                                                                                                                                                                                         |     |      |      |      |      |      |      |      |
|------------------------------------------------------------------------------------------------------------------------------------------------------------------|-----------------------------------------------------------------------------------------------------------------------------------------------------------------------------------------|-----|------|------|------|------|------|------|------|
| accuracy=1.000<br>cb8564_c39014/f1p0/3019<br>isoform=cb8564_c39014;full_length_coverage=1;non_full_length_coverage=0;isoform_length=3019;expected_accuracy=0.992 | curacy=0.999<br>gnl BL_ORD_ID 17429      cb8564_c85447/f1p0/3196<br>isoform=cb8564_c85447;full_length_coverage=1;non_full_length_coverage=0;isoform_length=3196;expected_accuracy=0.997 | 1   | 2467 | 2469 | 3013 | 3    | 2413 | 2662 | 3192 |
| cb8564_c1994/f1p0/2024<br>isoform=cb8564_c1994;full_length_coverage=1;non_full_length_coverage=0;isoform_length=2024;expected_accuracy=0.995                     | gnl BL_ORD_ID 13434      cb8564_c1993/f1p0/2538<br>isoform=cb8564_c1993;full_length_coverage=1;non_full_length_coverage=0;isoform_length=2538;expected_accuracy=0.993                   | 10  | 1187 | 1186 | 2024 | 2    | 1170 | 1694 | 2525 |
| cb7611_c26/f1p0/2483                                                                                                                                             | gnl BL_ORD_ID 7565      cb7611_c19/f1p0/3611<br>isoform=cb7611_c19;full_length_coverage=1;non_full_length_coverage=0;isoform_length=3611;expected_accuracy=0.991                        | 289 | 2198 | 66   | 290  | 1674 | 3589 | 1    | 224  |
| cb8564_c42506/f1p0/2909                                                                                                                                          | gnl BL_ORD_ID 56613      cb8564_c48653/f1p0/4470                                                                                                                                        | 1   | 2200 | 2199 | 2856 | 1059 | 3258 | 3131 | 3796 |
| cb1039_c4/f2p2/4154<br>isoform=cb1039_c4;full_length_coverage=2;non_full_length_coverage=2;isoform_length=4154;expected_accuracy=1.000                           | gnl BL_ORD_ID 1556      cb1039_c41/f1p0/4155<br>isoform=cb1039_c41;full_length_coverage=1;non_full_length_coverage=0;isoform_length=4155;expected_accuracy=0.999                        | 20  | 2652 | 2652 | 4099 | 1    | 2626 | 2732 | 4155 |
| cb8564_c16669/f1p0/2894                                                                                                                                          | gnl BL_ORD_ID 11380      cb8564_c12334/f3p1/4316<br>isoform=cb8564_c12334;full_length_coverage=3;non_full_length_coverage=1;isoform_length=4316;expected_accuracy=0.998                 | 1   | 1723 | 1721 | 2706 | 785  | 2507 | 3318 | 4303 |
| cb8564_c36808/f1p0/2756                                                                                                                                          | gnl BL_ORD_ID 56353      cb8564_c75114/f1p0/2866                                                                                                                                        | 19  | 2050 | 2050 | 2555 | 4    | 2035 | 2193 | 2701 |
| cb6606_c32/f1p0/1651                                                                                                                                             | gnl BL_ORD_ID 49866      cb6606_c12/f1p0/2893                                                                                                                                           | 1   | 1197 | 1196 | 1651 | 1    | 1193 | 1855 | 230  |

|                                                                                                                      |                                                                                                                    |                         |      |      |      |      |      |      |      |      |   |
|----------------------------------------------------------------------------------------------------------------------|--------------------------------------------------------------------------------------------------------------------|-------------------------|------|------|------|------|------|------|------|------|---|
| isoform=cb6606_c32;full_length_coverage=1;non_full_length_coverage=0;isoform_length=1651;expected_accuracy=0.995     |                                                                                                                    |                         |      |      |      |      |      |      |      |      | 8 |
| cb8564_c40810/f1p0/3998                                                                                              |                                                                                                                    |                         |      |      |      |      |      |      |      |      |   |
| isoform=cb8564_c40810;full_length_coverage=1;non_full_length_coverage=0;isoform_length=3998;expected_accuracy=0.996  | gnl BL_ORD_ID 55207                                                                                                | cb8564_c35399/f1p0/4553 | 1    | 2765 | 2761 | 3998 | 73   | 2836 | 3039 | 4276 |   |
| cb8564_c2326/f1p0/2006                                                                                               | gnl BL_ORD_ID 13231                                                                                                | cb8564_c2282/f1p1/3052  |      |      |      |      |      |      |      |      |   |
| isoform=cb8564_c2326;full_length_coverage=1;non_full_length_coverage=0;isoform_length=2006;expected_accuracy=0.990   | isoform=cb8564_c2282;full_length_coverage=1;non_full_length_coverage=1;isoform_length=3052;expected_accuracy=0.995 |                         | 230  | 2006 | 6    | 234  | 1280 | 3050 | 1    | 232  |   |
| cb2927_c0/f3p1/3122                                                                                                  | gnl BL_ORD_ID 37704                                                                                                | cb2927_c8/f1p1/3276     |      |      |      |      |      |      |      |      |   |
| isoform=cb2927_c0;full_length_coverage=3;non_full_length_coverage=1;isoform_length=3122;expected_accuracy=1.000      | isoform=cb2927_c8;full_length_coverage=1;non_full_length_coverage=1;isoform_length=3276;expected_accuracy=1.000    |                         | 1319 | 3122 | 1    | 1318 | 1464 | 3267 | 1    | 1318 |   |
| cb6719_c46/f1p0/2507                                                                                                 | gnl BL_ORD_ID 4666                                                                                                 | cb6719_c24/f1p0/2613    |      |      |      |      |      |      |      |      |   |
|                                                                                                                      | isoform=cb6719_c24;full_length_coverage=1;non_full_length_coverage=0;isoform_length=2613;expected_accuracy=0.998   |                         | 1    | 1435 | 1434 | 2452 | 1    | 1437 | 1559 | 2576 |   |
| cb8564_c115640/f1p0/2569                                                                                             |                                                                                                                    |                         |      |      |      |      |      |      |      |      |   |
| isoform=cb8564_c115640;full_length_coverage=1;non_full_length_coverage=0;isoform_length=2569;expected_accuracy=0.995 | gnl BL_ORD_ID 55680                                                                                                | cb8564_c4257/f1p0/3687  | 1    | 1406 | 1407 | 2545 | 1    | 1406 | 2525 | 3664 |   |
| cb6320_c1/f2p0/1818                                                                                                  | gnl BL_ORD_ID 5687                                                                                                 | cb6320_c2/f1p0/2874     |      |      |      |      |      |      |      |      |   |
| isoform=cb6320_c1;full_length_coverage=2;non_full_length_coverage=0;isoform_length=1818;expected_accuracy=0.995      | isoform=cb6320_c2;full_length_coverage=1;non_full_length_coverage=0;isoform_length=2874;expected_accuracy=0.995    |                         | 1    | 1206 | 1202 | 1818 | 91   | 1283 | 2226 | 2872 |   |



|                                                                                                                                                |                                                                                                                                                                      |     |      |      |      |      |          |      |          |  |
|------------------------------------------------------------------------------------------------------------------------------------------------|----------------------------------------------------------------------------------------------------------------------------------------------------------------------|-----|------|------|------|------|----------|------|----------|--|
| acy=0.997                                                                                                                                      | cy=0.995                                                                                                                                                             |     |      |      |      |      |          |      |          |  |
| cb10132_c18/f1p1/1347                                                                                                                          | gnl BL_ORD_ID 57227 cb8564_c87128/f1p2/1996                                                                                                                          | 401 | 1301 | 42   | 401  | 1078 | 197<br>9 | 129  | 487      |  |
| cb8564_c10682/f1p0/1913<br>isoform=cb8564_c10682;full_length_coverage=1;non_full_length_coverage=0;isoform_length=1913;expected_accuracy=0.994 | gnl BL_ORD_ID 11948 cb8564_c146094/f3p3/2130<br>isoform=cb8564_c146094;full_length_coverage=3;non_full_length_coverage=3;isoform_length=2130;expected_accuracy=1.000 | 1   | 1045 | 1041 | 1913 | 45   | 108<br>7 | 1258 | 213<br>0 |  |
| cb500_c21/f1p0/3434<br>isoform=cb500_c21;full_length_coverage=1;non_full_length_coverage=0;isoform_length=3434;expected_accuracy=0.996         | gnl BL_ORD_ID 72245 cb500_c44/f1p0/3962                                                                                                                              | 1   | 1834 | 1833 | 3369 | 57   | 188<br>8 | 2351 | 388<br>7 |  |
| cb8564_c49562/f1p0/2838<br>isoform=cb8564_c49562;full_length_coverage=1;non_full_length_coverage=0;isoform_length=2838;expected_accuracy=0.995 | gnl BL_ORD_ID 15193 cb8564_c42308/f1p5/3192<br>isoform=cb8564_c42308;full_length_coverage=1;non_full_length_coverage=5;isoform_length=3192;expected_accuracy=0.995   | 1   | 2331 | 2327 | 2837 | 1    | 234<br>5 | 2677 | 319<br>1 |  |
| cb6406_c65/f1p0/1830<br>isoform=cb6406_c65;full_length_coverage=1;non_full_length_coverage=0;isoform_length=1830;expected_accuracy=0.992       | gnl BL_ORD_ID 49692 cb6406_c59/f1p0/2372                                                                                                                             | 1   | 1055 | 1051 | 1830 | 142  | 1197     | 1328 | 210<br>8 |  |
| cb8564_c68409/f2p0/2141<br>isoform=cb8564_c68409;full_length_coverage=2;non_full_length_coverage=0;isoform_length=2141;expected_accuracy=0.995 | gnl BL_ORD_ID 12420 cb8564_c125410/f1p0/2472<br>isoform=cb8564_c125410;full_length_coverage=1;non_full_length_coverage=0;isoform_length=2472;expected_accuracy=0.997 | 264 | 2135 | 57   | 266  | 600  | 247<br>2 | 2    | 211      |  |
| cb9901_c0/f4p0/1305<br>isoform=cb9901_c0;full_length_coverage=4;non_full_length_coverage=0;isoform_length=1305;expected_accuracy=0.997         | gnl BL_ORD_ID 19917 cb9901_c2/f2p0/1904<br>isoform=cb9901_c2;full_length_coverage=2;non_full_length_coverage=0;isoform_length=1904;expected_accuracy=0.997           | 440 | 1305 | 9    | 441  | 1014 | 190<br>3 | 1    | 433      |  |

|                                                                                                                                                                         |                                                                                                                                                                         |     |      |      |      |      |          |      |          |
|-------------------------------------------------------------------------------------------------------------------------------------------------------------------------|-------------------------------------------------------------------------------------------------------------------------------------------------------------------------|-----|------|------|------|------|----------|------|----------|
| acy=0.997<br>cb16364_c4/f1p5/1679<br>isoform=cb16364_c4;full_length_coverage=1;non_full_length_coverage=5;isoform_length=1679;expected_accuracy=0.991                   | cy=0.994<br>gnl BL_ORD_ID 61352 cb1417_c6/f1p1/4358                                                                                                                     | 438 | 1619 | 8    | 441  | 3204 | 438<br>7 | 10   | 441      |
| cb8564_c23436/f1p0/3497<br>isoform=cb8564_c23436;full_length_coverage=1;non_full_length_coverage=0;isoform_length=3497;expected_accuracy=0.994                          | gnl BL_ORD_ID 15178      cb8564_c36410/f1p0/4676<br>isoform=cb8564_c36410;full_length_coverage=1;non_full_length_coverage=0;isoform_length=4676;expected_accuracy=0.991 | 1   | 2305 | 2305 | 3497 | 12   | 231<br>7 | 3483 | 467<br>3 |
| cb3290_c194/f3p0/2878<br>isoform=cb3290_c194;full_length_coverage=3;non_full_length_coverage=0;isoform_length=2878;expected_accuracy=0.997                              | gnl BL_ORD_ID 40560      cb3290_c85/f2p1/2883<br>isoform=cb3290_c85;full_length_coverage=2;non_full_length_coverage=1;isoform_length=2883;expected_accuracy=0.998       | 1   | 1497 | 1498 | 2767 | 9    | 150<br>2 | 1614 | 288<br>3 |
| cb6499_c24/f1p0/1697<br><br>cb1956_c14/f1p0/2988<br>isoform=cb1956_c14;full_length_coverage=1;non_full_length_coverage=0;isoform_length=2988;expected_accuracy=0.998    | gnl BL_ORD_ID 5167      cb6499_c4/f3p1/2065<br>isoform=cb6499_c4;full_length_coverage=3;non_full_length_coverage=1;isoform_length=2065;expected_accuracy=0.998          | 1   | 1336 | 1333 | 1708 | 54   | 138<br>8 | 1626 | 200<br>1 |
| cb8564_c48916/f1p0/3009<br><br>cb5728_c10/f1p1/1983<br>isoform=cb5728_c10;full_length_coverage=1;non_full_length_coverage=1;isoform_length=1983;expected_accuracy=0.998 | gnl BL_ORD_ID 66543 cb1956_c24/f1p0/3428<br><br>gnl BL_ORD_ID 55176 cb8564_c34738/f1p0/4152<br><br>gnl BL_ORD_ID 74351 cb5728_c13/f1p1/2211                             | 1   | 2571 | 2571 | 2988 | 2    | 259<br>3 | 2732 | 314<br>5 |
|                                                                                                                                                                         |                                                                                                                                                                         | 280 | 2880 | 1    | 283  | 1394 | 399<br>2 | 31   | 311      |
|                                                                                                                                                                         |                                                                                                                                                                         | 186 | 1952 | 1    | 185  | 412  | 217<br>2 | 39   | 219      |

|                                                                                                                      |                     |                                                                                                                     |     |      |      |      |     |     |      |     |
|----------------------------------------------------------------------------------------------------------------------|---------------------|---------------------------------------------------------------------------------------------------------------------|-----|------|------|------|-----|-----|------|-----|
| racy=0.992                                                                                                           |                     |                                                                                                                     |     |      |      |      |     |     |      |     |
| cb1279_c21/f1p0/2474                                                                                                 | gnl BL_ORD_ID 61182 | cb1279_c29/f1p0/3632                                                                                                | 14  | 1888 | 1885 | 2444 | 1   | 187 | 3100 | 365 |
|                                                                                                                      |                     |                                                                                                                     |     |      |      |      |     | 5   |      | 9   |
| cb2082_c32/f1p0/2897                                                                                                 | gnl BL_ORD_ID 66682 | cb2082_c19/f1p0/2908                                                                                                | 1   | 1434 | 1433 | 2635 | 8   | 144 | 1608 | 280 |
|                                                                                                                      |                     |                                                                                                                     |     |      |      |      |     | 1   |      | 9   |
| cb8564_c178999/f1p0/2222                                                                                             |                     |                                                                                                                     |     |      |      |      |     |     |      |     |
| isoform=cb8564_c178999;full_length_coverage=1;non_full_length_coverage=0;isoform_length=2222;expected_accuracy=0.994 | gnl BL_ORD_ID 55430 | cb8564_c41551/f1p0/3408                                                                                             | 14  | 1778 | 1773 | 2222 | 12  | 177 | 2505 | 295 |
|                                                                                                                      |                     |                                                                                                                     |     |      |      |      |     | 2   |      | 2   |
| cb7601_c7/f1p0/1884                                                                                                  | gnl BL_ORD_ID 7855  | cb7601_c2/f3p0/2000                                                                                                 | 14  | 1492 | 1497 | 1805 | 1   | 147 | 1598 | 190 |
|                                                                                                                      |                     | isoform=cb7601_c2;full_length_coverage=3;non_full_length_coverage=0;isoform_length=2000;expected_accuracy=0.999     |     |      |      |      |     | 9   |      | 6   |
| cb7749_c11/f1p1/1246                                                                                                 | gnl BL_ORD_ID 7216  | cb7749_c1/f4p1/1314                                                                                                 | 169 | 1151 | 4    | 173  | 325 | 130 | 5    | 170 |
|                                                                                                                      |                     | isoform=cb7749_c1;full_length_coverage=4;non_full_length_coverage=1;isoform_length=1314;expected_accuracy=1.000     |     |      |      |      |     | 3   |      |     |
| cb8564_c146025/f2p1/3347                                                                                             | gnl BL_ORD_ID 13377 | cb8564_c22091/f2p0/3351                                                                                             | 1   | 1680 | 1677 | 3224 | 1   | 168 | 1805 | 335 |
| isoform=cb8564_c146025;full_length_coverage=2;non_full_length_coverage=1;isoform_length=3347;expected_accuracy=0.996 |                     | isoform=cb8564_c22091;full_length_coverage=2;non_full_length_coverage=0;isoform_length=3351;expected_accuracy=0.997 |     |      |      |      |     | 2   |      | 1   |
| cb10385_c10/f1p0/1526                                                                                                |                     |                                                                                                                     |     |      |      |      |     |     |      |     |
| isoform=cb10385_c10;full_length_coverage=1;non_full_length_coverage=0;isoform_length=1526;expected_accuracy=0.994    | gnl BL_ORD_ID 48458 | cb10385_c5/f1p0/1837                                                                                                | 236 | 1523 | 3    | 234  | 375 | 166 | 4    | 235 |
|                                                                                                                      |                     |                                                                                                                     |     |      |      |      |     | 3   |      |     |
| cb2785_c20/f1p2/2883                                                                                                 | gnl BL_ORD_ID 36863 | cb2785_c14/f1p0/2954                                                                                                | 1   | 1577 | 1577 | 2796 | 28  | 160 | 1737 | 295 |

|                                                                                                                                             |                                                                                                                                                                         |     |      |      |      |      |      |      |      |   |
|---------------------------------------------------------------------------------------------------------------------------------------------|-------------------------------------------------------------------------------------------------------------------------------------------------------------------------|-----|------|------|------|------|------|------|------|---|
| isoform=cb2785_c20;full_length_coverage=1;non_full_length_coverage=2;isoform_length=2883;expected_accuracy=0.997<br>cb15632_c0/f5p0/1384    | isoform=cb2785_c14;full_length_coverage=1;non_full_length_coverage=0;isoform_length=2954;expected_accuracy=0.996<br>gnl BL_ORD_ID 18694      cb8564_c80201/f2p0/3643    |     |      |      |      |      |      | 9    |      | 4 |
| isoform=cb15632_c0;full_length_coverage=5;non_full_length_coverage=0;isoform_length=1384;expected_accuracy=1.000<br>cb8564_c23232/f1p3/2540 | isoform=cb8564_c80201;full_length_coverage=2;non_full_length_coverage=0;isoform_length=3643;expected_accuracy=0.996<br>gnl BL_ORD_ID 55328      cb8564_c38464/f1p0/2918 | 577 | 1384 | 9    | 579  | 2547 | 3354 | 1    | 571  |   |
| cb8564_c35865/f2p2/3469                                                                                                                     | gnl BL_ORD_ID 13863      cb8564_c20625/f1p0/3774                                                                                                                        | 16  | 2172 | 2167 | 2500 | 5    | 2161 | 2263 | 2596 |   |
| isoform=cb8564_c35865;full_length_coverage=2;non_full_length_coverage=2;isoform_length=3469;expected_accuracy=1.000<br>cb3671_c9/f1p1/3273  | isoform=cb8564_c20625;full_length_coverage=1;non_full_length_coverage=0;isoform_length=3774;expected_accuracy=0.996<br>gnl BL_ORD_ID 71434      cb3671_c14/f1p0/3470    | 1   | 2925 | 2924 | 3467 | 1    | 2921 | 3227 | 3773 |   |
| isoform=cb3671_c9;full_length_coverage=1;non_full_length_coverage=1;isoform_length=3273;expected_accuracy=0.999<br>cb6789_c6/f1p0/2385      | gnl BL_ORD_ID 4622      cb6789_c1/f1p0/2768                                                                                                                             | 1   | 2910 | 2910 | 3262 | 32   | 2940 | 3116 | 3469 |   |
| isoform=cb6789_c6;full_length_coverage=1;non_full_length_coverage=0;isoform_length=2385;expected_accuracy=0.995<br>cb7532_c12/f3p1/2769     | gnl BL_ORD_ID 8323      cb7532_c6/f1p0/2816                                                                                                                             | 229 | 2345 | 1    | 228  | 654  | 2768 | 206  | 433  |   |
| isoform=cb7532_c12;full_length_coverage=3;non_full_length_coverage=1;isoform_length=2769;expected_accuracy=1.000<br>cb4962_c0/f3p0/1119     | isoform=cb7532_c6;full_length_coverage=1;non_full_length_coverage=0;isoform_length=2816;expected_accuracy=1.000<br>gnl BL_ORD_ID 43826      cb4962_c2/f1p0/2493         | 705 | 2737 | 77   | 705  | 779  | 2816 | 1    | 634  |   |
|                                                                                                                                             |                                                                                                                                                                         | 395 | 1119 | 4    | 397  | 1770 | 249  | 1    | 388  |   |

|                                                                                                                     |                                                                                                                    |     |      |      |      |      |      |      |      |  |
|---------------------------------------------------------------------------------------------------------------------|--------------------------------------------------------------------------------------------------------------------|-----|------|------|------|------|------|------|------|--|
| isoform=cb4962_c0;full_length_coverage=3;non_full_length_coverage=0;isoform_length=1119;expected_accuracy=0.996     | isoform=cb4962_c2;full_length_coverage=1;non_full_length_coverage=0;isoform_length=2493;expected_accuracy=0.992    |     |      |      |      |      |      | 3    |      |  |
| cb499_c41/f1p0/3022                                                                                                 | gnl BL_ORD_ID 72236 cb499_c46/f1p0/3594                                                                            | 15  | 2092 | 2091 | 3012 | 9    | 2086 | 2296 | 3217 |  |
| cb8564_c86964/f1p0/2501                                                                                             | gnl BL_ORD_ID 13944 cb8564_c4652/f3p0/3053                                                                         |     |      |      |      |      |      |      |      |  |
| isoform=cb8564_c86964;full_length_coverage=1;non_full_length_coverage=0;isoform_length=2501;expected_accuracy=0.993 | isoform=cb8564_c4652;full_length_coverage=3;non_full_length_coverage=0;isoform_length=3053;expected_accuracy=0.996 | 1   | 1791 | 1790 | 2481 | 214  | 1996 | 2363 | 3053 |  |
| cb15591_c1/f1p1/1413                                                                                                | gnl BL_ORD_ID 59641 cb9317_c6/f1p0/2118                                                                            |     |      |      |      |      |      |      |      |  |
| isoform=cb15591_c1;full_length_coverage=1;non_full_length_coverage=1;isoform_length=1413;expected_accuracy=0.999    |                                                                                                                    | 280 | 1413 | 4    | 284  | 539  | 1672 | 1    | 278  |  |
| cb3965_c3/f1p0/2377                                                                                                 | gnl BL_ORD_ID 71681 cb3965_c1/f1p0/3487                                                                            |     |      |      |      |      |      |      |      |  |
| isoform=cb3965_c3;full_length_coverage=1;non_full_length_coverage=0;isoform_length=2377;expected_accuracy=0.995     |                                                                                                                    | 1   | 1578 | 1578 | 2373 | 937  | 2514 | 2641 | 3435 |  |
| cb8564_c40598/f1p4/3119                                                                                             | gnl BL_ORD_ID 55182 cb8564_c34825/f1p2/3200                                                                        |     |      |      |      |      |      |      |      |  |
| isoform=cb8564_c40598;full_length_coverage=1;non_full_length_coverage=0;isoform_length=3119;expected_accuracy=0.995 |                                                                                                                    | 11  | 2732 | 2729 | 3054 | 6    | 2754 | 2875 | 3197 |  |
| cb8564_c16829/f1p3/2089                                                                                             | gnl BL_ORD_ID 52763 cb8564_c13243/f1p0/4432                                                                        |     |      |      |      |      |      |      |      |  |
| isoform=cb8564_c16829;full_length_coverage=1;non_full_length_coverage=3;isoform_length=2089;expected_accuracy=0.995 |                                                                                                                    | 228 | 2071 | 65   | 229  | 2440 | 4283 | 29   | 191  |  |
| cb7735_c2/f2p0/1143                                                                                                 | gnl BL_ORD_ID 8557 cb7735_c3/f2p0/2531                                                                             |     |      |      |      |      |      |      |      |  |
| isoform=cb7735_c2;full_length_coverage=2;non_full_length_coverage=0;isoform_length=1143;expected_accuracy=0.995     | isoform=cb7735_c3;full_length_coverage=2;non_full_length_coverage=0;isoform_length=2531;expected_accuracy=0.995    | 434 | 1143 | 8    | 435  | 1810 | 2511 | 1    | 432  |  |

|                                                                                                                                                    |                                                                                                                                                                                      |      |      |      |      |      |          |      |          |
|----------------------------------------------------------------------------------------------------------------------------------------------------|--------------------------------------------------------------------------------------------------------------------------------------------------------------------------------------|------|------|------|------|------|----------|------|----------|
| cy=1.000<br>cb2275_c0/f1p0/3981<br>isoform=cb2275_c0;full_length_coverage=1;non_full_length_coverage=0;isoform_length=3981;expected_accuracy=0.998 | cy=1.000<br>gnl BL_ORD_ID 9389      cb8564_c108071/f9p6/4539<br>isoform=cb8564_c108071;full_length_coverage=9;non_full_length_coverage=6;isoform_length=4539;expected_accuracy=1.000 | 15   | 3840 | 3835 | 3981 | 4494 | 668      | 183  | 23       |
| cb8564_c87721/f1p0/2168<br>isoform=cb8564_c87721;full_length_coverage=1;non_full_length_coverage=0;isoform_length=2168;expected_accuracy=0.997     | gnl BL_ORD_ID 15882      cb8564_c69162/f3p0/2862<br>isoform=cb8564_c69162;full_length_coverage=3;non_full_length_coverage=0;isoform_length=2862;expected_accuracy=0.998              | 1    | 1811 | 1809 | 2074 | 140  | 195<br>0 | 2597 | 286<br>2 |
| cb5098_c14/f1p0/2880                                                                                                                               | gnl BL_ORD_ID 42664      cb5098_c0/f41p2/2921<br>isoform=cb5098_c0;full_length_coverage=41;non_full_length_coverage=2;isoform_length=2921;expected_accuracy=1.000                    | 1    | 1987 | 1985 | 2698 | 65   | 205<br>4 | 2207 | 292<br>0 |
| cb8564_c38233/f1p0/2780                                                                                                                            | gnl BL_ORD_ID 55373      cb8564_c39785/f1p0/3296                                                                                                                                     | 1    | 1857 | 1856 | 2762 | 346  | 220<br>2 | 2327 | 323<br>3 |
| cb8564_c39720/f1p0/4003                                                                                                                            | gnl BL_ORD_ID 54095      cb8564_c18359/f1p0/3917                                                                                                                                     | 820  | 3713 | 99   | 821  | 931  | 382<br>3 | 47   | 769      |
| cb8564_c39546/f1p2/3023                                                                                                                            | gnl BL_ORD_ID 18852      cb8564_c84488/f1p0/3408<br>isoform=cb8564_c84488;full_length_coverage=1;non_full_length_coverage=0;isoform_length=3408;expected_accuracy=0.996              | 216  | 2835 | 1    | 216  | 790  | 340<br>8 | 1    | 217      |
| cb3862_c16/f1p2/3488                                                                                                                               | gnl BL_ORD_ID 71572      cb3862_c15/f1p0/4329                                                                                                                                        | 1665 | 3479 | 11   | 1666 | 2224 | 403<br>8 | 2    | 165<br>6 |
| cb8564_c54206/f2p0/3081<br>isoform=cb8564_c54206;full_length_coverage=2;non_full_length_coverage=0;isoform_length=3081;expected_                   | gnl BL_ORD_ID 15130      cb8564_c33393/f7p2/3346<br>isoform=cb8564_c33393;full_length_coverage=7;non_full_length_coverage=2;isoform_length=3346;expected_ac                          | 1    | 1805 | 1804 | 3081 | 1    | 180<br>5 | 1966 | 324<br>3 |

|                                                                                                                                                                    |                                                             |     |      |      |      |     |      |      |      |
|--------------------------------------------------------------------------------------------------------------------------------------------------------------------|-------------------------------------------------------------|-----|------|------|------|-----|------|------|------|
| accuracy=0.997<br>cb8564_c181853/f1p0/2119<br>isoform=cb8564_c181853;full_length_coverage=1;non_full_length_coverage=0;isoform_length=2119;expected_accuracy=0.997 | curacy=0.996<br>gnl BL_ORD_ID 55940 cb8564_c49691/f1p0/2905 | 1   | 1339 | 1334 | 2119 | 7   | 1338 | 2102 | 2891 |
| cb3665_c20/f1p0/2779<br>isoform=cb3665_c2;full_length_coverage=1;non_full_length_coverage=0;isoform_length=2916;expected_accuracy=0.993                            | gnl BL_ORD_ID 39191 cb3665_c2/f1p0/2916                     | 1   | 1482 | 1479 | 2669 | 6   | 1485 | 1616 | 2807 |
| cb653_c12/f1p0/3754<br>isoform=cb653_c12;full_length_coverage=1;non_full_length_coverage=0;isoform_length=3754;expected_accuracy=0.995                             | gnl BL_ORD_ID 5129 cb653_c6/f1p0/4151                       | 195 | 3754 | 1    | 195  | 537 | 4097 | 111  | 309  |
| cb8333_c1/f2p1/2101<br>isoform=cb8333_c1;full_length_coverage=2;non_full_length_coverage=1;isoform_length=2101;expected_accuracy=1.000                             | gnl BL_ORD_ID 52473 cb8333_c6/f1p0/2576                     | 342 | 2078 | 4    | 342  | 736 | 2472 | 19   | 357  |
| cb388_c28/f1p3/3528<br>isoform=cb388_c28;full_length_coverage=1;non_full_length_coverage=3;isoform_length=3528;expected_accuracy=1.000                             | gnl BL_ORD_ID 69593 cb388_c51/f1p0/3691                     | 222 | 3474 | 21   | 222  | 377 | 3630 | 23   | 222  |
| cb8564_c42207/f1p0/3158<br>isoform=cb8564_c107323;full_length_coverage=4;non_full_length_coverage=0;isoform_length=3768;expected_accuracy=0.999                    | gnl BL_ORD_ID 10029 cb8564_c107323/f4p0/3768                | 1   | 2776 | 2771 | 3186 | 1   | 2774 | 3351 | 3767 |
| cb3366_c7/f1p0/3317                                                                                                                                                | gnl BL_ORD_ID 71148 cb3366_c6/f1p0/3643                     | 1   | 2945 | 2945 | 3317 | 1   | 294  | 3146 | 351  |

|                                                                                                                 |                     |                         |                                                                                                                      |    |      |      |      |     |          |      |          |
|-----------------------------------------------------------------------------------------------------------------|---------------------|-------------------------|----------------------------------------------------------------------------------------------------------------------|----|------|------|------|-----|----------|------|----------|
| isoform=cb3366_c7;full_length_coverage=1;non_full_length_coverage=0;isoform_length=3317;expected_accuracy=0.997 |                     |                         |                                                                                                                      |    |      |      |      | 8   | 8        |      |          |
| cb2172_c21/f1p1/2738                                                                                            | gnl BL_ORD_ID 35668 | cb2172_c5/f2p0/3992     | isoform=cb2172_c5;full_length_coverage=2;non_full_length_coverage=0;isoform_length=3992;expected_accuracy=1.000      | 1  | 1399 | 1402 | 2714 | 46  | 147<br>2 | 2678 | 399<br>2 |
| cb1306_c36/f1p0/2164                                                                                            | gnl BL_ORD_ID 61218 | cb1306_c35/f1p0/3110    | isoform=cb1306_c36;full_length_coverage=1;non_full_length_coverage=0;isoform_length=2164;expected_accuracy=1.000     | 1  | 1793 | 1788 | 2164 | 53  | 184<br>5 | 2701 | 307<br>7 |
| cb8564_c10872/f1p2/2947                                                                                         | gnl BL_ORD_ID 12601 | cb8564_c13656/f1p0/3139 | isoform=cb8564_c10872;full_length_coverage=1;non_full_length_coverage=2;isoform_length=2947;expected_accuracy=0.994  | 22 | 2667 | 2666 | 2922 | 1   | 264<br>0 | 2883 | 313<br>9 |
| cb8564_c152353/f2p3/2614                                                                                        | gnl BL_ORD_ID 13115 | cb8564_c16916/f7p1/3034 | isoform=cb8564_c152353;full_length_coverage=1;non_full_length_coverage=1;isoform_length=2614;expected_accuracy=0.996 | 1  | 1504 | 1502 | 2500 | 143 | 164<br>6 | 1853 | 285<br>2 |
| cb17345_c6/f1p1/2375                                                                                            | gnl BL_ORD_ID 32580 | cb17345_c8/f1p0/3246    | isoform=cb17345_c6;full_length_coverage=1;non_full_length_coverage=1;isoform_length=2375;expected_accuracy=0.998     | 1  | 1634 | 1633 | 2375 | 2   | 163<br>5 | 2499 | 324<br>0 |
| cb8564_c4775/f1p0/2922                                                                                          | gnl BL_ORD_ID 16021 | cb8564_c4813/f1p1/3090  | isoform=cb8564_c4775;full_length_coverage=1;non_full_length_coverage=0;isoform_length=2922;expected_accuracy=0.997   | 1  | 2387 | 2385 | 2872 | 2   | 239<br>2 | 2603 | 309<br>0 |



|                                                                                                                                                                  |                                                                                                                                                                                          |      |      |      |      |      |      |      |      |
|------------------------------------------------------------------------------------------------------------------------------------------------------------------|------------------------------------------------------------------------------------------------------------------------------------------------------------------------------------------|------|------|------|------|------|------|------|------|
| curacy=0.995<br>cb8564_c110147/f1p0/3399<br>isoform=cb8564_c110147;full_length_coverage=1;non_full_length_coverage=0;isoform_length=3399;expected_accuracy=0.999 | curacy=0.999<br>gnl BL_ORD_ID 9995      cb8564_c111409/f2p0/3661<br>isoform=cb8564_c111409;full_length_coverage=2;non_full_length_coverage=0;isoform_length=3661;expected_accuracy=0.999 | 1    | 2834 | 2832 | 3399 | 9    | 2863 | 3093 | 3661 |
| cb7496_c25/f1p1/1093<br>isoform=cb7496_c25;full_length_coverage=1;non_full_length_coverage=1;isoform_length=1093;expected_accuracy=0.991                         | gnl BL_ORD_ID 7688      cb7496_c9/f2p1/1474<br>isoform=cb7496_c9;full_length_coverage=2;non_full_length_coverage=1;isoform_length=1474;expected_accuracy=0.995                           | 365  | 1086 | 9    | 367  | 757  | 1474 | 97   | 457  |
| cb8564_c50128/f1p0/4343                                                                                                                                          | gnl BL_ORD_ID 14819      cb8564_c40333/f1p2/4446<br>isoform=cb8564_c40333;full_length_coverage=1;non_full_length_coverage=2;isoform_length=4446;expected_accuracy=0.998                  | 28   | 3278 | 3274 | 4077 | 1    | 3280 | 3545 | 4349 |
| cb8564_c40598/f1p4/3119                                                                                                                                          | gnl BL_ORD_ID 53680      cb8564_c153222/f2p39/3454                                                                                                                                       | 1    | 2732 | 2729 | 3041 | 7    | 2737 | 2858 | 3170 |
| cb1656_c19/f1p1/3657<br>isoform=cb1656_c19;full_length_coverage=1;non_full_length_coverage=1;isoform_length=3657;expected_accuracy=1.000                         | gnl BL_ORD_ID 31007      cb1656_c7/f1p1/3974<br>isoform=cb1656_c7;full_length_coverage=1;non_full_length_coverage=1;isoform_length=3974;expected_accuracy=0.997                          | 2    | 2977 | 2976 | 3629 | 1    | 2976 | 3272 | 3922 |
| cb8564_c5122/f1p0/3329                                                                                                                                           | gnl BL_ORD_ID 55727      cb8564_c5115/f1p1/3855                                                                                                                                          | 1067 | 3334 | 1    | 1069 | 1370 | 3637 | 9    | 1078 |
| cb1956_c5/f2p0/2813<br>isoform=cb1956_c5;full_length_coverage=2;non_full_length_coverage=0;isoform_length=2813;expected_accuracy=0.997                           | gnl BL_ORD_ID 35490      cb1956_c14/f1p0/2988<br>isoform=cb1956_c14;full_length_coverage=1;non_full_length_coverage=0;isoform_length=2988;expected_accuracy=0.998                        | 1451 | 2811 | 1    | 1450 | 1627 | 2988 | 39   | 1464 |
| cb8564_c41551/f1p0/3408                                                                                                                                          | gnl BL_ORD_ID 17429      cb8564_c85447/f1p0/3196                                                                                                                                         | 12   | 2419 | 2418 | 2952 | 11   | 241  | 2660 | 319  |

|                         |                                                                                                                                                                                          |     |      |      |      |      |      |      |      |
|-------------------------|------------------------------------------------------------------------------------------------------------------------------------------------------------------------------------------|-----|------|------|------|------|------|------|------|
|                         | isoform=cb8564_c85447;full_length_coverage=1;non_full_length_coverage=0;isoform_length=3196;expected_accuracy=0.997                                                                      |     |      |      |      |      | 3    |      | 6    |
| cb227_c11/f1p1/3717     | gnl BL_ORD_ID 37093                      cb227_c5/f1p0/3888<br>isoform=cb227_c5;full_length_coverage=1;non_full_length_coverage=0;isoform_length=3888;expected_accuracy=0.998            | 1   | 2510 | 2510 | 3693 | 6    | 2523 | 2712 | 3888 |
| cb6657_c4/f1p1/2205     | gnl BL_ORD_ID 5662                      cb6657_c0/f1p1/2805<br>isoform=cb6657_c4;full_length_coverage=1;non_full_length_coverage=1;isoform_length=2205;expected_accuracy=1.000           | 1   | 1818 | 1817 | 2205 | 3    | 1814 | 2305 | 2693 |
| cb4166_c3/f1p0/1896     | gnl BL_ORD_ID 43549                      cb4166_c5/f1p0/2886<br>isoform=cb4166_c3;full_length_coverage=1;non_full_length_coverage=0;isoform_length=1896;expected_accuracy=1.000          | 370 | 1893 | 47   | 370  | 1367 | 2886 | 1    | 327  |
| cb8564_c71815/f1p0/2753 | gnl BL_ORD_ID 9497                      cb8564_c107044/f3p8/2832<br>isoform=cb8564_c107044;full_length_coverage=3;non_full_length_coverage=8;isoform_length=2832;expected_accuracy=0.998 | 1   | 1377 | 1372 | 2485 | 104  | 1478 | 1712 | 2829 |
| cb938_c3/f5p1/3495      | gnl BL_ORD_ID 59101                      cb938_c9/f1p0/4170<br>isoform=cb938_c3;full_length_coverage=5;non_full_length_coverage=1;isoform_length=3495;expected_accuracy=0.999            | 116 | 2596 | 2596 | 3495 | 85   | 2565 | 3262 | 4161 |
| cb8599_c19/f1p1/2037    | gnl BL_ORD_ID 18446                      cb8599_c8/f1p1/2281<br>isoform=cb8599_c8;full_length_coverage=1;non_full_length_coverage=1;isoform_length=2281;expected_accuracy=1.000          | 218 | 2020 | 45   | 219  | 403  | 2204 | 4    | 180  |

|                                                                                                                                                |                                                                                                                                                                                   |     |      |      |      |      |      |      |      |
|------------------------------------------------------------------------------------------------------------------------------------------------|-----------------------------------------------------------------------------------------------------------------------------------------------------------------------------------|-----|------|------|------|------|------|------|------|
| cb3292_c8/f1p0/3523<br>isoform=cb3292_c8;full_length_coverage=1;non_full_length_coverage=0;isoform_length=3523;expected_accuracy=0.991         | cy=0.998<br>gnl BL_ORD_ID 41083          cb3292_c10/f1p0/3715<br>isoform=cb3292_c10;full_length_coverage=1;non_full_length_coverage=0;isoform_length=3715;expected_accuracy=0.993 | 23  | 2348 | 2346 | 3444 | 1    | 2332 | 2618 | 3715 |
| cb8564_c23645/f1p0/2729                                                                                                                        | gnl BL_ORD_ID 54283          cb8564_c21726/f1p0/2757                                                                                                                              | 1   | 2066 | 2062 | 2477 | 1    | 2066 | 2200 | 2614 |
| cb8564_c50151/f1p0/3198<br>isoform=cb8564_c50151;full_length_coverage=1;non_full_length_coverage=0;isoform_length=3198;expected_accuracy=0.995 | gnl BL_ORD_ID 55195          cb8564_c35170/f1p0/3386                                                                                                                              | 503 | 3189 | 6    | 502  | 738  | 3399 | 1    | 497  |
| cb9214_c4/f3p0/1986<br>isoform=cb9214_c4;full_length_coverage=3;non_full_length_coverage=0;isoform_length=1986;expected_accuracy=0.999         | gnl BL_ORD_ID 21271          cb9214_c11/f1p0/2500<br>isoform=cb9214_c11;full_length_coverage=1;non_full_length_coverage=0;isoform_length=2500;expected_accuracy=0.999             | 1   | 1652 | 1652 | 1986 | 1    | 1654 | 2164 | 2500 |
| cb2842_c11/f1p0/2421<br>isoform=cb2842_c11;full_length_coverage=1;non_full_length_coverage=0;isoform_length=2421;expected_accuracy=0.994       | gnl BL_ORD_ID 39044          cb2842_c6/f2p1/2719<br>isoform=cb2842_c6;full_length_coverage=2;non_full_length_coverage=1;isoform_length=2719;expected_accuracy=0.996               | 147 | 2421 | 1    | 146  | 269  | 2549 | 1    | 146  |
| cb8564_c4679/f1p1/2608                                                                                                                         | gnl BL_ORD_ID 18308          cb8564_c936/f6p4/2901<br>isoform=cb8564_c936;full_length_coverage=6;non_full_length_coverage=4;isoform_length=2901;expected_accuracy=0.997           | 251 | 2604 | 11   | 250  | 349  | 2702 | 8    | 247  |
| cb3309_c9/f1p0/2090<br>isoform=cb3309_c9;full_length_coverage=1;non_full_length_coverage=0;isoform_length=2090;expected_accuracy=0.997         | gnl BL_ORD_ID 70307          cb3309_c10/f1p1/3166                                                                                                                                 | 193 | 2090 | 1    | 195  | 1272 | 3160 | 1    | 197  |

|                          |                                                                                                                                                                           |      |      |      |      |      |      |      |      |  |
|--------------------------|---------------------------------------------------------------------------------------------------------------------------------------------------------------------------|------|------|------|------|------|------|------|------|--|
| acy=0.999                |                                                                                                                                                                           |      |      |      |      |      |      |      |      |  |
| cb548_c67/f1p3/3075      | gnl BL_ORD_ID 46779      cb548_c109/f1p0/3280<br>isoform=cb548_c109;full_length_coverage=1;non_full_length_coverage=0;isoform_length=3280;expected_accuracy=0.996         | 1298 | 3026 | 1    | 1301 | 1551 | 3279 | 45   | 1340 |  |
| cb8564_c71585/f1p0/2336  | gnl BL_ORD_ID 12705      cb8564_c15619/f1p0/3068<br>isoform=cb8564_c15619;full_length_coverage=1;non_full_length_coverage=0;isoform_length=3068;expected_accuracy=0.996   | 622  | 2317 | 80   | 625  | 1242 | 2947 | 1    | 546  |  |
| cb18275_c11/f1p1/1730    | gnl BL_ORD_ID 53227      cb8564_c119414/f1p2/2048                                                                                                                         | 131  | 1733 | 1    | 134  | 400  | 2002 | 78   | 211  |  |
| cb4744_c5/f1p0/1551      | gnl BL_ORD_ID 72925      cb4744_c2/f1p0/3502<br>isoform=cb4744_c5;full_length_coverage=1;non_full_length_coverage=0;isoform_length=1551;expected_accuracy=0.994           | 1    | 1151 | 1150 | 1551 | 102  | 1248 | 2620 | 3020 |  |
| cb8564_c86760/f1p1/2598  | gnl BL_ORD_ID 16151      cb8564_c71575/f1p1/3050<br>isoform=cb8564_c86760;full_length_coverage=1;non_full_length_coverage=1;isoform_length=2598;expected_accuracy=0.998   | 249  | 2597 | 1    | 250  | 689  | 3050 | 1    | 249  |  |
| cb8564_c129638/f1p0/2479 | gnl BL_ORD_ID 12871      cb8564_c167845/f2p2/3087<br>isoform=cb8564_c167845;full_length_coverage=2;non_full_length_coverage=2;isoform_length=3087;expected_accuracy=0.992 | 1    | 1627 | 1623 | 2475 | 173  | 1798 | 2202 | 3054 |  |
| cb6326_c66/f1p0/1099     | gnl BL_ORD_ID 49616      cb6326_c18/f1p3/1610                                                                                                                             | 216  | 1105 | 7    | 220  | 668  | 1555 | 114  | 315  |  |
| cb3061_c4/f2p0/2362      | gnl BL_ORD_ID 38031      cb3061_c7/f1p0/2487                                                                                                                              | 173  | 2362 | 17   | 174  | 275  | 246  | 1    | 160  |  |

|                                                                                                                     |                                                                                                                     |      |      |      |      |      |      |      |     |  |
|---------------------------------------------------------------------------------------------------------------------|---------------------------------------------------------------------------------------------------------------------|------|------|------|------|------|------|------|-----|--|
| isoform=cb3061_c4;full_length_coverage=2;non_full_length_coverage=0;isoform_length=2362;expected_accuracy=0.993     | isoform=cb3061_c7;full_length_coverage=1;non_full_length_coverage=0;isoform_length=2487;expected_accuracy=0.993     |      |      |      |      |      |      | 4    |     |  |
| cb8564_c15653/f1p4/2475                                                                                             | gnl BL_ORD_ID 55935 cb8564_c49443/f1p0/2984                                                                         | 22   | 2293 | 2289 | 2418 | 66   | 233  | 2553 | 268 |  |
| cb8564_c45596/f1p1/3430                                                                                             | gnl BL_ORD_ID 55944 cb8564_c49827/f1p0/4362                                                                         | 2    | 2780 | 2775 | 3379 | 1    | 277  | 2898 | 350 |  |
| cb3037_c11/f1p1/3242                                                                                                | gnl BL_ORD_ID 38293 cb3037_c6/f1p1/3564                                                                             |      |      |      |      |      |      |      |     |  |
| isoform=cb3037_c11;full_length_coverage=1;non_full_length_coverage=1;isoform_length=3242;expected_accuracy=0.999    | isoform=cb3037_c6;full_length_coverage=1;non_full_length_coverage=1;isoform_length=3564;expected_accuracy=1.000     | 1    | 2082 | 2081 | 3242 | 13   | 209  | 2223 | 338 |  |
| cb8564_c10938/f1p1/2321                                                                                             | gnl BL_ORD_ID 52761 cb8564_c13197/f1p0/3718                                                                         | 1    | 1315 | 1310 | 2292 | 1174 | 248  | 2607 | 358 |  |
| cb4452_c4/f1p0/2965                                                                                                 | gnl BL_ORD_ID 72572 cb4452_c3/f1p0/3340                                                                             |      |      |      |      |      |      |      |     |  |
| isoform=cb4452_c4;full_length_coverage=1;non_full_length_coverage=0;isoform_length=2965;expected_accuracy=0.995     |                                                                                                                     | 1218 | 2965 | 1    | 1220 | 1566 | 329  | 234  | 144 |  |
| cb8564_c39136/f1p0/3036                                                                                             | gnl BL_ORD_ID 15152 cb8564_c38629/f2p1/3246                                                                         |      |      |      |      |      |      |      |     |  |
| isoform=cb8564_c39136;full_length_coverage=1;non_full_length_coverage=0;isoform_length=3036;expected_accuracy=0.998 | isoform=cb8564_c38629;full_length_coverage=2;non_full_length_coverage=1;isoform_length=3246;expected_accuracy=0.993 | 1    | 2089 | 2085 | 3036 | 1    | 212  | 2252 | 320 |  |
| cb953_c2/f2p1/3253                                                                                                  | gnl BL_ORD_ID 20812 cb953_c1/f2p0/4567                                                                              |      |      |      |      |      |      |      |     |  |
| isoform=cb953_c2;full_length_coverage=2;non_full_length_coverage=1;isoform_length=3253;expected_accuracy=1.000      | isoform=cb953_c1;full_length_coverage=2;non_full_length_coverage=0;isoform_length=4567;expected_accuracy=0.999      | 1    | 2229 | 2225 | 3253 | 35   | 226  | 3530 | 456 |  |
| cb9058_c14/f1p0/1762                                                                                                | gnl BL_ORD_ID 21924 cb9058_c9/f1p1/2092                                                                             | 1    | 1121 | 1116 | 1762 | 32   | 1153 | 1283 | 192 |  |

|                                                                                                                                                |                                                                                                                                                                         |      |      |      |      |      |          |      |          |   |
|------------------------------------------------------------------------------------------------------------------------------------------------|-------------------------------------------------------------------------------------------------------------------------------------------------------------------------|------|------|------|------|------|----------|------|----------|---|
| isoform=cb9058_c14;full_length_coverage=1;non_full_length_coverage=0;isoform_length=1762;expected_accuracy=0.995<br>cb1754_c0/f2p0/1934        | isoform=cb9058_c9;full_length_coverage=1;non_full_length_coverage=1;isoform_length=2092;expected_accuracy=1.000                                                         |      |      |      |      |      |          |      |          | 9 |
| isoform=cb1754_c0;full_length_coverage=2;non_full_length_coverage=0;isoform_length=1934;expected_accuracy=1.000<br>cb8564_c38815/f1p3/3473     | gnl BL_ORD_ID 63921 cb1754_c1/f1p0/4184                                                                                                                                 | 231  | 1934 | 65   | 233  | 2092 | 379<br>5 | 3    | 171      |   |
| isoform=cb8564_c38815;full_length_coverage=1;non_full_length_coverage=3;isoform_length=3473;expected_accuracy=0.995<br>cb8564_c45300/f1p4/3014 | gnl BL_ORD_ID 15059      cb8564_c26915/f3p0/3758<br>isoform=cb8564_c26915;full_length_coverage=3;non_full_length_coverage=0;isoform_length=3758;expected_accuracy=1.000 | 1    | 2729 | 2727 | 3368 | 7    | 273<br>7 | 3117 | 375<br>8 |   |
| isoform=cb8564_c45300;full_length_coverage=1;non_full_length_coverage=4;isoform_length=3014;expected_accuracy=0.996                            | gnl BL_ORD_ID 56764 cb8564_c70795/f1p0/3769                                                                                                                             | 243  | 3014 | 19   | 246  | 415  | 318<br>5 | 34   | 258      |   |
| cb8564_c38035/f1p0/2770                                                                                                                        | gnl BL_ORD_ID 14836      cb8564_c41692/f1p3/2987<br>isoform=cb8564_c41692;full_length_coverage=1;non_full_length_coverage=3;isoform_length=2987;expected_accuracy=0.995 | 1    | 2035 | 2033 | 2755 | 1    | 206<br>1 | 2255 | 298<br>7 |   |
| cb8564_c74269/f1p0/2347                                                                                                                        | gnl BL_ORD_ID 57849 cb8564_c82482/f1p0/3780                                                                                                                             | 1033 | 2348 | 1    | 1034 | 2350 | 366<br>8 | 3    | 103<br>5 |   |
| cb7511_c29/f1p1/2416                                                                                                                           | gnl BL_ORD_ID 50563 cb7511_c6/f1p0/3521                                                                                                                                 | 107  | 1950 | 1950 | 2416 | 3    | 184<br>8 | 2719 | 318<br>5 |   |
| isoform=cb7511_c29;full_length_coverage=1;non_full_length_coverage=1;isoform_length=2416;expected_accuracy=0.997<br>cb8564_c76495/f1p0/3949    | gnl BL_ORD_ID 57678 cb8564_c9837/f2p0/4515                                                                                                                              | 1    | 2913 | 2912 | 3943 | 95   | 300      | 3484 | 451      |   |

|                                                                                                                                          |                                                                                                                                                                    |      |      |      |      |      |          |      |          |
|------------------------------------------------------------------------------------------------------------------------------------------|--------------------------------------------------------------------------------------------------------------------------------------------------------------------|------|------|------|------|------|----------|------|----------|
|                                                                                                                                          |                                                                                                                                                                    |      |      |      |      |      |          | 7    | 5        |
| cb8800_c4/f1p0/1370<br>isoform=cb8800_c4;full_length_coverage=1;non_full_length_coverage=0;isoform_length=1370;expected_accuracy=0.992   | gnl BL_ORD_ID 58373 cb8800_c1/f1p0/2412                                                                                                                            | 1    | 1057 | 1052 | 1370 | 667  | 172<br>4 | 1870 | 218<br>9 |
| cb8564_c14176/f1p0/4818                                                                                                                  | gnl BL_ORD_ID 67919 cb18654_c16/f1p0/5228                                                                                                                          | 2    | 4085 | 4086 | 4566 | 27   | 4110     | 4735 | 521<br>4 |
| cb653_c6/f1p0/4151<br>isoform=cb653_c6;full_length_coverage=1;non_full_length_coverage=0;isoform_length=4151;expected_accuracy=0.996     | gnl BL_ORD_ID 5131 cb653_c8/f1p1/4297<br>isoform=cb653_c8;full_length_coverage=1;non_full_length_coverage=1;isoform_length=4297;expected_accuracy=0.999            | 308  | 4135 | 1    | 309  | 474  | 429<br>7 | 1    | 307      |
| cb16807_c2/f1p0/1293                                                                                                                     | gnl BL_ORD_ID 32276 cb16807_c1/f1p0/1485<br>isoform=cb16807_c1;full_length_coverage=1;non_full_length_coverage=0;isoform_length=1485;expected_accuracy=0.998       | 233  | 1272 | 56   | 233  | 432  | 147<br>1 | 1    | 178      |
| cb8564_c14280/f1p0/2385                                                                                                                  | gnl BL_ORD_ID 13862 cb8564_c20620/f1p1/2688<br>isoform=cb8564_c20620;full_length_coverage=1;non_full_length_coverage=1;isoform_length=2688;expected_accuracy=0.992 | 1    | 2052 | 2049 | 2286 | 247  | 229<br>9 | 2399 | 263<br>5 |
| cb1772_c28/f3p2/3809<br>isoform=cb1772_c28;full_length_coverage=3;non_full_length_coverage=2;isoform_length=3809;expected_accuracy=1.000 | gnl BL_ORD_ID 66372 cb1772_c16/f1p1/4029                                                                                                                           | 309  | 3809 | 12   | 310  | 431  | 394<br>4 | 12   | 295      |
| cb8564_c178226/f1p0/2728<br>isoform=cb8564_c178226;full_length_coverage=1;non_full_length_coverage=0;isoform_length=2728;expected        | gnl BL_ORD_ID 14263 cb8564_c42654/f1p1/2906<br>isoform=cb8564_c42654;full_length_coverage=1;non_full_length_coverage=1;isoform_length=2906;expected                | 1284 | 2706 | 1    | 1288 | 1397 | 282<br>4 | 1    | 129<br>2 |

|                                                                                                                                                  |                                                                                                                                                                      |     |      |      |      |      |          |      |          |  |
|--------------------------------------------------------------------------------------------------------------------------------------------------|----------------------------------------------------------------------------------------------------------------------------------------------------------------------|-----|------|------|------|------|----------|------|----------|--|
| _accuracy=0.998                                                                                                                                  | curacy=0.990                                                                                                                                                         |     |      |      |      |      |          |      |          |  |
| cb8564_c87188/f1p1/3426                                                                                                                          | gnl BL_ORD_ID 55939 cb8564_c49630/f1p4/3487                                                                                                                          | 127 | 3021 | 3021 | 3271 | 18   | 291<br>3 | 3243 | 349<br>3 |  |
| cb1380_c36/f1p0/2344<br>isoform=cb1380_c36;full_length_coverage=1;non_full_length_coverage=0;isoform_length=2344;expected_accuracy=0.998         | gnl BL_ORD_ID 25713 cb1380_c45/f1p0/3005<br>isoform=cb1380_c45;full_length_coverage=1;non_full_length_coverage=0;isoform_length=3005;expected_accuracy=0.996         | 1   | 1513 | 1512 | 2344 | 1    | 151<br>4 | 2168 | 300<br>5 |  |
| cb11760_c0/f1p0/1120<br>isoform=cb11760_c0;full_length_coverage=1;non_full_length_coverage=0;isoform_length=1120;expected_accuracy=1.000         | gnl BL_ORD_ID 60353 cb11760_c1/f1p0/3328                                                                                                                             | 332 | 1120 | 43   | 332  | 1965 | 275<br>6 | 4    | 293      |  |
| cb8564_c68610/f6p0/2150<br>isoform=cb8564_c68610;full_length_coverage=6;non_full_length_coverage=0;isoform_length=2150;expected_accuracy=1.000   | gnl BL_ORD_ID 12420 cb8564_c125410/f1p0/2472<br>isoform=cb8564_c125410;full_length_coverage=1;non_full_length_coverage=0;isoform_length=2472;expected_accuracy=0.997 | 212 | 2083 | 4    | 214  | 600  | 247<br>2 | 1    | 211      |  |
| cb8564_c123951/f1p1/4450<br>isoform=cb8564_c123951;full_length_coverage=1;non_full_length_coverage=1;isoform_length=4450;expected_accuracy=0.996 | gnl BL_ORD_ID 52930 cb8564_c112168/f1p0/4870                                                                                                                         | 310 | 4450 | 1    | 311  | 547  | 469<br>2 | 79   | 390      |  |
| cb2367_c4/f1p0/1959                                                                                                                              | gnl BL_ORD_ID 37426 cb2367_c5/f1p0/2867<br>isoform=cb2367_c5;full_length_coverage=1;non_full_length_coverage=0;isoform_length=2867;expected_accuracy=0.990           | 1   | 1317 | 1316 | 1938 | 5    | 132<br>9 | 2163 | 279<br>6 |  |
| cb8564_c180116/f1p0/2944<br>isoform=cb8564_c180116;full_length_coverage=1;non_full_length_coverage=0;isoform_length=2944;expected                | gnl BL_ORD_ID 17429 cb8564_c85447/f1p0/3196<br>isoform=cb8564_c85447;full_length_coverage=1;non_full_length_coverage=0;isoform_length=3196;expected_ac               | 2   | 2522 | 2520 | 2944 | 1    | 254<br>0 | 2769 | 319<br>1 |  |



|                         |                                                                                                                                                                                           |     |      |      |      |      |          |      |          |  |
|-------------------------|-------------------------------------------------------------------------------------------------------------------------------------------------------------------------------------------|-----|------|------|------|------|----------|------|----------|--|
| _accuracy=0.996         | curacy=0.997                                                                                                                                                                              |     |      |      |      |      |          |      |          |  |
| cb124_c43/f1p0/2759     | gnl BL_ORD_ID 23059                      cb124_c7/f2p0/3544<br>isoform=cb124_c7;full_length_coverage=2;non_full_length_coverage=0;isoform_length=3544;expected_accuracy=1.000             | 232 | 2473 | 13   | 233  | 1303 | 354<br>4 | 12   | 232      |  |
| cb8564_c36689/f1p1/2368 | gnl BL_ORD_ID 55391   cb8564_c40278/f3p2/3083<br>isoform=cb8564_c36689;full_length_coverage=1;non_full_length_coverage=1;isoform_length=2368;expected_accuracy=0.991                      | 1   | 1709 | 1706 | 2368 | 1    | 170<br>3 | 2202 | 286<br>6 |  |
| cb2461_c3/f1p0/3258     | gnl BL_ORD_ID 37876                      cb2461_c6/f1p0/5655<br>isoform=cb2461_c6;full_length_coverage=1;non_full_length_coverage=0;isoform_length=5655;expected_accuracy=0.998           | 1   | 2947 | 2942 | 3250 | 1666 | 460<br>6 | 4924 | 523<br>2 |  |
| cb8564_c16741/f1p0/2997 | gnl BL_ORD_ID 11111                      cb8564_c108411/f1p1/3146<br>isoform=cb8564_c108411;full_length_coverage=1;non_full_length_coverage=1;isoform_length=3146;expected_accuracy=0.991 | 375 | 3001 | 52   | 376  | 450  | 310<br>0 | 1    | 330      |  |
| cb2263_c3/f2p0/2490     | gnl BL_ORD_ID 36791                      cb2263_c5/f1p0/3994<br>isoform=cb2263_c3;full_length_coverage=2;non_full_length_coverage=0;isoform_length=2490;expected_accuracy=0.999           | 1   | 1382 | 1383 | 2490 | 54   | 143<br>6 | 2457 | 356<br>6 |  |
| cb8564_c45300/f1p4/3014 | gnl BL_ORD_ID 12913                      cb8564_c182049/f1p0/3195<br>isoform=cb8564_c45300;full_length_coverage=1;non_full_length_coverage=4;isoform_length=3014;expected_accuracy=0.996  | 243 | 3014 | 1    | 246  | 398  | 319<br>3 | 1    | 240      |  |
| cb8564_c42583/f1p0/1936 | gnl BL_ORD_ID 56037   cb8564_c53029/f1p0/2512                                                                                                                                             | 1   | 1200 | 1200 | 1919 | 1    | 1199     | 1795 | 251      |  |

|                         |                                                                                                                                                                          |     |      |      |      |      |          |      |          |
|-------------------------|--------------------------------------------------------------------------------------------------------------------------------------------------------------------------|-----|------|------|------|------|----------|------|----------|
|                         |                                                                                                                                                                          |     |      |      |      |      |          |      | 3        |
| cb1088_c12/f1p0/2593    | gnl BL_ORD_ID 1951      cb1088_c6/f1p2/3285<br>isoform=cb1088_c6;full_length_coverage=1;non_full_length_coverage=2;isoform_length=3285;expected_accuracy=0.997           | 1   | 1648 | 1650 | 2507 | 219  | 186<br>7 | 2357 | 321<br>4 |
| cb8564_c37748/f1p0/3835 | gnl BL_ORD_ID 15300      cb8564_c45205/f10p2/4247<br>isoform=cb8564_c37748;full_length_coverage=1;non_full_length_coverage=0;isoform_length=3835;expected_accuracy=0.995 | 287 | 3755 | 1    | 286  | 775  | 424<br>7 | 366  | 651      |
| cb8564_c13348/f1p0/2742 | gnl BL_ORD_ID 56381      cb8564_c75626/f1p2/3199<br>isoform=cb8564_c13348;full_length_coverage=1;non_full_length_coverage=0;isoform_length=2742;expected_accuracy=0.995  | 1   | 2151 | 2149 | 2731 | 4    | 2116     | 2611 | 318<br>4 |
| cb7873_c1/f1p0/2332     | gnl BL_ORD_ID 6464      cb7873_c0/f1p0/2514<br>isoform=cb7873_c1;full_length_coverage=1;non_full_length_coverage=0;isoform_length=2332;expected_accuracy=0.997           | 1   | 1265 | 1266 | 2332 | 53   | 131<br>5 | 1417 | 248<br>4 |
| cb6889_c17/f1p0/2549    | gnl BL_ORD_ID 5980      cb6889_c7/f3p1/2671<br>isoform=cb6889_c7;full_length_coverage=3;non_full_length_coverage=1;isoform_length=2671;expected_accuracy=1.000           | 359 | 2357 | 61   | 364  | 653  | 265<br>2 | 1    | 295      |
| cb8564_c91068/f1p0/3080 | gnl BL_ORD_ID 14956      cb8564_c34985/f1p0/3209<br>isoform=cb8564_c34985;full_length_coverage=1;non_full_length_coverage=0;isoform_length=3209;expected_accuracy=0.991  | 2   | 2598 | 2596 | 2821 | 485  | 309<br>4 | 2982 | 320<br>8 |
| cb8564_c90349/f1p0/3076 | gnl BL_ORD_ID 17076      cb8564_c81253/f1p0/4323                                                                                                                         | 466 | 3081 | 9    | 465  | 1695 | 432      | 1    | 457      |



|                                                                                                                                                               |                                                                                                                                                                                      |     |      |      |      |     |      |      |      |
|---------------------------------------------------------------------------------------------------------------------------------------------------------------|--------------------------------------------------------------------------------------------------------------------------------------------------------------------------------------|-----|------|------|------|-----|------|------|------|
| uracy=1.000<br>cb8564_c31999/f5p0/2360<br>isoform=cb8564_c31999;full_length_coverage=5;non_full_length_coverage=0;isoform_length=2360;expected_accuracy=1.000 | acy=1.000<br>gnl BL_ORD_ID 16625      cb8564_c72796/f1p0/2508<br>isoform=cb8564_c72796;full_length_coverage=1;non_full_length_coverage=0;isoform_length=2508;expected_accuracy=0.997 | 164 | 2360 | 11   | 168  | 313 | 2508 | 1    | 157  |
| cb2482_c31/f1p1/2865<br>isoform=cb2482_c31;full_length_coverage=1;non_full_length_coverage=1;isoform_length=2865;expected_accuracy=0.996                      | gnl BL_ORD_ID 38930      cb2482_c30/f13p1/3051<br>isoform=cb2482_c30;full_length_coverage=13;non_full_length_coverage=1;isoform_length=3051;expected_accuracy=1.000                  | 26  | 2632 | 2631 | 2862 | 93  | 2696 | 2820 | 3051 |
| cb2382_c7/f1p0/5459                                                                                                                                           | gnl BL_ORD_ID 69726      cb2382_c6/f1p1/5561                                                                                                                                         | 4   | 4592 | 4590 | 5090 | 115 | 4712 | 4818 | 5318 |
| cb2084_c13/f1p0/1992<br>isoform=cb2084_c13;full_length_coverage=1;non_full_length_coverage=0;isoform_length=1992;expected_accuracy=0.995                      | gnl BL_ORD_ID 35414      cb2084_c12/f1p0/3016<br>isoform=cb2084_c12;full_length_coverage=1;non_full_length_coverage=0;isoform_length=3016;expected_accuracy=0.999                    | 1   | 1519 | 1516 | 1992 | 3   | 1521 | 2540 | 3016 |
| cb3887_c13/f1p0/2422                                                                                                                                          | gnl BL_ORD_ID 39510      cb3887_c4/f1p0/2446<br>isoform=cb3887_c4;full_length_coverage=1;non_full_length_coverage=0;isoform_length=2446;expected_accuracy=0.994                      | 260 | 2358 | 28   | 259  | 348 | 2446 | 2    | 232  |
| cb5999_c5/f1p0/2393<br>isoform=cb5999_c5;full_length_coverage=1;non_full_length_coverage=0;isoform_length=2393;expected_accuracy=0.996                        | gnl BL_ORD_ID 74748      cb5999_c6/f1p0/2868                                                                                                                                         | 1   | 1285 | 1283 | 2393 | 82  | 1369 | 1697 | 2806 |
| cb8564_c91729/f1p1/2879                                                                                                                                       | gnl BL_ORD_ID 56255      cb8564_c72763/f1p0/3108                                                                                                                                     | 362 | 2782 | 6    | 357  | 388 | 2809 | 199  | 542  |
| cb3988_c6/f1p0/2823                                                                                                                                           | gnl BL_ORD_ID 41321      cb3988_c1/f1p1/3470                                                                                                                                         | 1   | 1841 | 1837 | 2828 | 222 | 205  | 2423 | 3411 |

|                         |                                                                                                                                                                             |     |      |      |      |     |      |      |      |   |  |  |
|-------------------------|-----------------------------------------------------------------------------------------------------------------------------------------------------------------------------|-----|------|------|------|-----|------|------|------|---|--|--|
|                         | isoform=cb3988_c1;full_length_coverage=1;non_full_length_coverage=1;isoform_length=3470;expected_accuracy=1.000                                                             |     |      |      |      |     |      |      |      | 1 |  |  |
| cb8564_c23232/f1p3/2540 | gnl BL_ORD_ID 13065      cb8564_c157334/f1p21/2777<br>isoform=cb8564_c157334;full_length_coverage=1;non_full_length_coverage=21;isoform_length=2777;expected_accuracy=0.995 | 16  | 2172 | 2167 | 2518 | 11  | 2174 | 2276 | 2627 |   |  |  |
| cb4768_c85/f1p0/1983    | isoform=cb4768_c85;full_length_coverage=1;non_full_length_coverage=0;isoform_length=1983;expected_accuracy=1.000                                                            |     |      |      |      |     |      |      |      |   |  |  |
|                         | gnl BL_ORD_ID 71998      cb4768_c50/f1p0/2391                                                                                                                               | 103 | 1965 | 1    | 106  | 423 | 2285 | 3    | 109  |   |  |  |
| cb8564_c4643/f1p1/2554  | gnl BL_ORD_ID 12102      cb8564_c136340/f3p2/2729<br>isoform=cb8564_c136340;full_length_coverage=3;non_full_length_coverage=2;isoform_length=2729;expected_accuracy=0.998   | 1   | 1705 | 1700 | 2521 | 67  | 1772 | 1905 | 2729 |   |  |  |
| cb10988_c4/f1p0/1116    | gnl BL_ORD_ID 293      cb10988_c7/f1p3/1227<br>isoform=cb10988_c7;full_length_coverage=1;non_full_length_coverage=0;isoform_length=1116;expected_accuracy=0.991             | 6   | 600  | 596  | 1116 | 1   | 595  | 707  | 1227 |   |  |  |
| cb1178_c27/f1p0/1197    | gnl BL_ORD_ID 23778      cb1178_c16/f1p0/1671<br>isoform=cb1178_c16;full_length_coverage=1;non_full_length_coverage=0;isoform_length=1197;expected_accuracy=0.992           | 111 | 1197 | 1    | 110  | 223 | 1308 | 1    | 103  |   |  |  |
| cb4802_c34/f1p0/1485    | gnl BL_ORD_ID 42547      cb4802_c39/f44p4/1860<br>isoform=cb4802_c39;full_length_coverage=44;non_full_length_coverage=0;isoform_length=1485;expected_accuracy=0.992         | 156 | 1485 | 27   | 161  | 508 | 1839 | 51   | 183  |   |  |  |

|                                                                                                                      |                                                                                                                   |     |      |      |      |      |          |      |          |  |  |
|----------------------------------------------------------------------------------------------------------------------|-------------------------------------------------------------------------------------------------------------------|-----|------|------|------|------|----------|------|----------|--|--|
| racy=0.997                                                                                                           | uracy=1.000                                                                                                       |     |      |      |      |      |          |      |          |  |  |
| cb2324_c36/f1p1/3463                                                                                                 | gnl BL_ORD_ID 68433 cb2324_c13/f1p0/4526                                                                          | 1   | 3229 | 3226 | 3477 | 21   | 325<br>6 | 4302 | 455<br>0 |  |  |
| cb8564_c39014/f1p0/3019                                                                                              |                                                                                                                   |     |      |      |      |      |          |      |          |  |  |
| isoform=cb8564_c39014;full_length_coverage=1;non_full_length_coverage=0;isoform_length=3019;expected_accuracy=0.992  | gnl BL_ORD_ID 55920 cb8564_c48949/f1p0/4357                                                                       | 1   | 2336 | 2337 | 3013 | 2    | 229<br>3 | 2847 | 350<br>4 |  |  |
| cb8564_c124170/f1p0/1999                                                                                             |                                                                                                                   |     |      |      |      |      |          |      |          |  |  |
| isoform=cb8564_c124170;full_length_coverage=1;non_full_length_coverage=0;isoform_length=1999;expected_accuracy=0.992 | gnl BL_ORD_ID 54528 cb8564_c125341/f1p0/3014                                                                      | 1   | 1549 | 1550 | 1999 | 14   | 153<br>7 | 2549 | 299<br>2 |  |  |
| cb9473_c9/f1p0/1550                                                                                                  | gnl BL_ORD_ID 20340 cb9473_c1/f1p1/2077                                                                           |     |      |      |      |      |          |      |          |  |  |
| isoform=cb9473_c9;full_length_coverage=1;non_full_length_coverage=0;isoform_length=1550;expected_accuracy=0.994      | isoform=cb9473_c1;full_length_coverage=1;non_full_length_coverage=1;isoform_length=2077;expected_accuracy=1.000   | 1   | 1225 | 1224 | 1550 | 228  | 145<br>1 | 1672 | 199<br>9 |  |  |
| cb8564_c1754/f1p0/4035                                                                                               | gnl BL_ORD_ID 35566 cb18781_c3/f1p0/7271                                                                          |     |      |      |      |      |          |      |          |  |  |
|                                                                                                                      | isoform=cb18781_c3;full_length_coverage=1;non_full_length_coverage=0;isoform_length=7271;expected_accuracy=0.995  | 1   | 3545 | 3543 | 4038 | 2686 | 622<br>1 | 6343 | 683<br>9 |  |  |
| cb6499_c4/f3p1/2065                                                                                                  | gnl BL_ORD_ID 4653 cb6499_c26/f12p0/2255                                                                          |     |      |      |      |      |          |      |          |  |  |
| isoform=cb6499_c4;full_length_coverage=3;non_full_length_coverage=1;isoform_length=2065;expected_accuracy=0.998      | isoform=cb6499_c26;full_length_coverage=12;non_full_length_coverage=0;isoform_length=2255;expected_accuracy=1.000 | 170 | 2063 | 1    | 171  | 357  | 225<br>0 | 3    | 171      |  |  |
| cb8564_c46939/f1p1/2926                                                                                              | gnl BL_ORD_ID 14091 cb8564_c43119/f1p4/3194                                                                       |     |      |      |      |      |          |      |          |  |  |
|                                                                                                                      | isoform=cb8564_c43119;full_length_coverage=1;non_full_length_coverage=4;isoform_length=3194;expected_ac           | 1   | 2134 | 2130 | 2870 | 1    | 215<br>8 | 2263 | 3011     |  |  |

|                          |                                                                                                                                                                                                                                                                                                 |      |      |      |      |      |      |      |      |
|--------------------------|-------------------------------------------------------------------------------------------------------------------------------------------------------------------------------------------------------------------------------------------------------------------------------------------------|------|------|------|------|------|------|------|------|
| cb8564_c47286/f1p0/3783  | curacy=0.995<br>gnl BL_ORD_ID 13491      cb8564_c20651/f3p0/4196<br>isoform=cb8564_c20651;full_length_coverage=3;non_full_length_coverage=0;isoform_length=4196;expected_accuracy=0.997                                                                                                         | 1435 | 3807 | 1    | 1435 | 1721 | 4093 | 50   | 1485 |
| cb8564_c44698/f1p5/2843  | isoform=cb8564_c44698;full_length_coverage=1;non_full_length_coverage=5;isoform_length=2843;expected_accuracy=0.997<br>gnl BL_ORD_ID 55839      cb8564_c43677/f1p0/3269                                                                                                                         | 1    | 2516 | 2511 | 2823 | 55   | 2566 | 2685 | 2999 |
| cb12608_c1/f3p1/1172     | isoform=cb12608_c1;full_length_coverage=3;non_full_length_coverage=1;isoform_length=1172;expected_accuracy=1.000<br>gnl BL_ORD_ID 60962      cb12608_c13/f1p1/1437                                                                                                                              | 100  | 1169 | 1    | 100  | 352  | 1420 | 145  | 244  |
| cb8564_c118659/f2p0/3437 | isoform=cb8564_c118659;full_length_coverage=2;non_full_length_coverage=0;isoform_length=3437;expected_accuracy=0.994<br>gnl BL_ORD_ID 52309      cb8564_c117845/f1p1/3666                                                                                                                       | 1    | 2906 | 2907 | 3320 | 85   | 2994 | 3251 | 3665 |
| cb1333_c101/f1p0/1395    | isoform=cb1333_c101;full_length_coverage=1;non_full_length_coverage=0;isoform_length=1395;expected_accuracy=0.997<br>gnl BL_ORD_ID 25626      cb1333_c96/f1p0/1554<br>isoform=cb1333_c96;full_length_coverage=1;non_full_length_coverage=0;isoform_length=1554;expected_accuracy=0.991          | 149  | 1395 | 6    | 148  | 254  | 1497 | 1    | 142  |
| cb8564_c146025/f2p1/3347 | isoform=cb8564_c146025;full_length_coverage=2;non_full_length_coverage=1;isoform_length=3347;expected_accuracy=0.996<br>gnl BL_ORD_ID 12196      cb8564_c12654/f2p0/4122<br>isoform=cb8564_c12654;full_length_coverage=2;non_full_length_coverage=0;isoform_length=4122;expected_accuracy=1.000 | 1    | 1900 | 1900 | 3238 | 1    | 1901 | 2784 | 4122 |
| cb8564_c35568/f1p0/2997  | gnl BL_ORD_ID 14531      cb8564_c41778/f1p9/3482                                                                                                                                                                                                                                                | 265  | 2892 | 19   | 269  | 812  | 344  | 5    | 247  |

|                                                                                                                      |                                                                                                                     |                         |      |      |      |      |     |      |      |   |  |  |
|----------------------------------------------------------------------------------------------------------------------|---------------------------------------------------------------------------------------------------------------------|-------------------------|------|------|------|------|-----|------|------|---|--|--|
|                                                                                                                      | isoform=cb8564_c41778;full_length_coverage=1;non_full_length_coverage=9;isoform_length=3482;expected_accuracy=0.992 |                         |      |      |      |      |     |      |      | 2 |  |  |
| cb8564_c45827/f2p2/4435                                                                                              | gnl BL_ORD_ID 14942                                                                                                 | cb8564_c34188/f2p3/4546 |      |      |      |      |     |      |      |   |  |  |
| isoform=cb8564_c45827;full_length_coverage=2;non_full_length_coverage=2;isoform_length=4435;expected_accuracy=0.999  | isoform=cb8564_c34188;full_length_coverage=2;non_full_length_coverage=3;isoform_length=4546;expected_accuracy=1.000 | 270                     | 4422 | 1    | 274  | 398  | 454 | 19   | 293  | 6 |  |  |
| cb8564_c107877/f2p1/3829                                                                                             | gnl BL_ORD_ID 56428                                                                                                 | cb8564_c76764/f1p1/4492 |      |      |      |      |     |      |      |   |  |  |
| isoform=cb8564_c107877;full_length_coverage=2;non_full_length_coverage=1;isoform_length=3829;expected_accuracy=1.000 |                                                                                                                     | 258                     | 3824 | 1    | 259  | 952  | 451 | 147  | 407  | 9 |  |  |
| cb1909_c6/f1p0/3557                                                                                                  | gnl BL_ORD_ID 35723                                                                                                 | cb1909_c5/f1p0/3837     |      |      |      |      |     |      |      |   |  |  |
| isoform=cb1909_c5;full_length_coverage=1;non_full_length_coverage=0;isoform_length=3837;expected_accuracy=1.000      |                                                                                                                     | 2                       | 3344 | 3342 | 3520 | 72   | 341 | 3633 | 3811 | 2 |  |  |
| cb2177_c46/f1p0/2729                                                                                                 | gnl BL_ORD_ID 35943                                                                                                 | cb2177_c48/f1p0/3555    |      |      |      |      |     |      |      |   |  |  |
| isoform=cb2177_c48;full_length_coverage=1;non_full_length_coverage=0;isoform_length=3555;expected_accuracy=0.995     |                                                                                                                     | 15                      | 2187 | 2185 | 2713 | 1    | 216 | 3028 | 355  | 5 |  |  |
| cb5137_c53/f1p0/2672                                                                                                 | gnl BL_ORD_ID 59209                                                                                                 | cb1164_c15/f1p2/3151    |      |      |      |      |     |      |      |   |  |  |
| isoform=cb5137_c53;full_length_coverage=1;non_full_length_coverage=0;isoform_length=2672;expected_accuracy=0.992     |                                                                                                                     | 12                      | 2565 | 2562 | 2664 | 2803 | 227 | 123  | 22   |   |  |  |
| cb8564_c89179/f1p0/3763                                                                                              | gnl BL_ORD_ID 16165                                                                                                 | cb8564_c75981/f2p0/4046 |      |      |      |      |     |      |      |   |  |  |
| isoform=cb8564_c89179;full_length_coverage=1;non_full_length_coverage=0;isoform_length=3763;expected_accuracy=0.992  | isoform=cb8564_c75981;full_length_coverage=2;non_full_length_coverage=0;isoform_length=4046;expected_accuracy=0.992 | 521                     | 3737 | 9    | 522  | 830  | 404 | 1    | 514  | 6 |  |  |



|                                                                                                                                                                  |                                                                                                                                                                                         |      |      |      |      |      |      |      |      |
|------------------------------------------------------------------------------------------------------------------------------------------------------------------|-----------------------------------------------------------------------------------------------------------------------------------------------------------------------------------------|------|------|------|------|------|------|------|------|
| accuracy=0.995<br>cb8564_c22636/f1p0/2704<br>isoform=cb8564_c22636;full_length_coverage=1;non_full_length_coverage=0;isoform_length=2704;expected_accuracy=0.994 | curacy=0.995<br>gnl BL_ORD_ID 17366      cb8564_c80423/f1p0/3018<br>isoform=cb8564_c80423;full_length_coverage=1;non_full_length_coverage=0;isoform_length=3018;expected_accuracy=1.000 | 1    | 2092 | 2093 | 2704 | 1    | 2098 | 2335 | 2947 |
| cb3201_c33/f1p1/2925                                                                                                                                             | gnl BL_ORD_ID 70955      cb3201_c29/f1p0/3532                                                                                                                                           | 1    | 1485 | 1484 | 2830 | 2    | 1486 | 1862 | 3208 |
| cb1052_c55/f1p0/2730                                                                                                                                             | gnl BL_ORD_ID 219      cb1052_c15/f1p0/4466<br>isoform=cb1052_c15;full_length_coverage=1;non_full_length_coverage=0;isoform_length=4466;expected_accuracy=0.992                         | 599  | 2743 | 65   | 600  | 2177 | 4316 | 1    | 533  |
| cb8564_c44850/f1p0/3916<br>isoform=cb8564_c44850;full_length_coverage=1;non_full_length_coverage=0;isoform_length=3916;expected_accuracy=0.993                   | gnl BL_ORD_ID 56087      cb8564_c66874/f2p0/4090                                                                                                                                        | 1846 | 3916 | 1    | 1846 | 1967 | 4037 | 37   | 1866 |
| cb1613_c5/f1p0/2054<br>isoform=cb1613_c5;full_length_coverage=1;non_full_length_coverage=0;isoform_length=2054;expected_accuracy=1.000                           | gnl BL_ORD_ID 28653      cb1613_c2/f1p0/2771<br>isoform=cb1613_c2;full_length_coverage=1;non_full_length_coverage=0;isoform_length=2771;expected_accuracy=1.000                         | 1    | 1200 | 1195 | 1968 | 34   | 1215 | 1999 | 2771 |
| cb8564_c4742/f1p0/2505<br>isoform=cb8564_c4742;full_length_coverage=1;non_full_length_coverage=0;isoform_length=2505;expected_accuracy=0.999                     | gnl BL_ORD_ID 16010      cb8564_c4743/f1p0/2508<br>isoform=cb8564_c4743;full_length_coverage=1;non_full_length_coverage=0;isoform_length=2508;expected_accuracy=0.994                   | 1    | 2089 | 2084 | 2398 | 1    | 2089 | 2195 | 2508 |
| cb581_c4/f1p1/2569<br>isoform=cb581_c4;full_length_coverage=1;non_full_length_coverage=1;isoform_length=2569;expected_accuracy=0.999                             | gnl BL_ORD_ID 45252      cb581_c3/f1p1/4740<br>isoform=cb581_c3;full_length_coverage=1;non_full_length_coverage=1;isoform_length=4740;expected_accuracy=0.999                           | 1007 | 2569 | 1    | 1009 | 3107 | 4669 | 220  | 1227 |

|                                                                                                                                                                     |                                                                                                                                                                                    |     |      |      |      |      |      |      |      |
|---------------------------------------------------------------------------------------------------------------------------------------------------------------------|------------------------------------------------------------------------------------------------------------------------------------------------------------------------------------|-----|------|------|------|------|------|------|------|
| y=0.999<br>cb8564_c43779/f1p0/3021<br>isoform=cb8564_c43779;full_length_coverage=1;non_full_length_coverage=0;isoform_length=3021;expected_accuracy=0.993           | y=0.997<br>gnl BL_ORD_ID 14091      cb8564_c43119/f1p4/3194<br>isoform=cb8564_c43119;full_length_coverage=1;non_full_length_coverage=4;isoform_length=3194;expected_accuracy=0.995 | 1   | 2344 | 2345 | 2981 | 1    | 2360 | 2517 | 3157 |
| cb5585_c8/f1p0/1963<br>isoform=cb5585_c8;full_length_coverage=1;non_full_length_coverage=0;isoform_length=1963;expected_accuracy=0.995                              | gnl BL_ORD_ID 44917      cb5585_c4/f1p0/2892<br>isoform=cb5585_c4;full_length_coverage=1;non_full_length_coverage=0;isoform_length=2892;expected_accuracy=0.995                    | 1   | 1097 | 1095 | 1963 | 1    | 1101 | 1585 | 2443 |
| cb2737_c26/f1p0/2992<br>isoform=cb2737_c26;full_length_coverage=1;non_full_length_coverage=0;isoform_length=2992;expected_accuracy=0.996                            | gnl BL_ORD_ID 38132      cb2737_c20/f1p0/3644<br>isoform=cb2737_c20;full_length_coverage=1;non_full_length_coverage=0;isoform_length=3644;expected_accuracy=0.998                  | 1   | 1804 | 1802 | 2992 | 475  | 2278 | 2410 | 3602 |
| cb8564_c181853/f1p0/2119<br>isoform=cb8564_c181853;full_length_coverage=1;non_full_length_coverage=0;isoform_length=2119;expected_accuracy=0.997                    | gnl BL_ORD_ID 57846      cb8564_c82432/f1p1/3412                                                                                                                                   | 1   | 1339 | 1334 | 2119 | 1    | 1341 | 2221 | 3010 |
| cb15591_c1/f1p1/1413<br>isoform=cb15591_c1;full_length_coverage=1;non_full_length_coverage=1;isoform_length=1413;expected_accuracy=0.999                            | gnl BL_ORD_ID 59642      cb9317_c8/f1p0/1919                                                                                                                                       | 280 | 1413 | 4    | 284  | 543  | 1676 | 2    | 282  |
| cb8564_c43450/f1p0/2695<br>cb2629_c15/f1p0/2175<br>isoform=cb2629_c15;full_length_coverage=1;non_full_length_coverage=0;isoform_length=2175;expected_accuracy=0.999 | gnl BL_ORD_ID 55480      cb8564_c42677/f1p0/3180<br>gnl BL_ORD_ID 69477      cb18844_c1/f1p0/5518                                                                                  | 15  | 1886 | 1882 | 2713 | 21   | 1896 | 2011 | 2842 |
|                                                                                                                                                                     |                                                                                                                                                                                    | 1   | 1663 | 1662 | 2175 | 2726 | 4391 | 4502 | 5015 |

|                                                                                                                                          |                                                                                                                                                                         |     |      |      |      |     |      |      |      |  |
|------------------------------------------------------------------------------------------------------------------------------------------|-------------------------------------------------------------------------------------------------------------------------------------------------------------------------|-----|------|------|------|-----|------|------|------|--|
| racy=0.991                                                                                                                               |                                                                                                                                                                         |     |      |      |      |     |      |      |      |  |
| cb8564_c37361/f1p0/3076                                                                                                                  | gnl BL_ORD_ID 14539      cb8564_c46562/f2p3/3196<br>isoform=cb8564_c46562;full_length_coverage=2;non_full_length_coverage=3;isoform_length=3196;expected_accuracy=0.995 | 1   | 2481 | 2477 | 3066 | 7   | 2506 | 2607 | 3195 |  |
| cb2818_c34/f1p0/3053                                                                                                                     | gnl BL_ORD_ID 68900      cb2818_c40/f1p0/3487                                                                                                                           | 114 | 2923 | 1    | 115  | 587 | 3395 | 30   | 142  |  |
| cb5516_c26/f1p0/3029<br>isoform=cb5516_c26;full_length_coverage=1;non_full_length_coverage=0;isoform_length=3029;expected_accuracy=1.000 | gnl BL_ORD_ID 46728      cb5516_c42/f1p2/3202<br>isoform=cb5516_c42;full_length_coverage=1;non_full_length_coverage=2;isoform_length=3202;expected_accuracy=0.995       | 1   | 2327 | 2322 | 3025 | 5   | 2328 | 2453 | 3159 |  |
| cb8564_c22866/f1p1/4372                                                                                                                  | gnl BL_ORD_ID 53911      cb8564_c14704/f1p2/4862                                                                                                                        | 1   | 2384 | 2385 | 4303 | 289 | 2672 | 2825 | 4744 |  |
| cb3586_c0/f4p0/3057<br>isoform=cb3586_c0;full_length_coverage=4;non_full_length_coverage=0;isoform_length=3057;expected_accuracy=1.000   | gnl BL_ORD_ID 71356      cb3586_c9/f1p0/3463                                                                                                                            | 350 | 3057 | 73   | 353  | 766 | 3472 | 1    | 282  |  |
| cb8564_c51722/f1p1/3503                                                                                                                  | gnl BL_ORD_ID 16149      cb8564_c47162/f1p0/3361<br>isoform=cb8564_c47162;full_length_coverage=1;non_full_length_coverage=0;isoform_length=3361;expected_accuracy=0.996 | 443 | 3214 | 67   | 444  | 592 | 3361 | 22   | 402  |  |
| cb3941_c50/f1p2/3496<br>isoform=cb3941_c50;full_length_coverage=1;non_full_length_coverage=2;isoform_length=3496;expected_accuracy=0.997 | gnl BL_ORD_ID 40541      cb3941_c38/f1p1/3548<br>isoform=cb3941_c38;full_length_coverage=1;non_full_length_coverage=1;isoform_length=3548;expected_accuracy=0.997       | 310 | 3496 | 113  | 310  | 354 | 3543 | 1    | 198  |  |
| cb8564_c40764/f1p0/2563                                                                                                                  | gnl BL_ORD_ID 14836      cb8564_c41692/f1p3/2987                                                                                                                        | 1   | 2167 | 2164 | 2563 | 1   | 218  | 2404 | 280  |  |



|                                                                                                                                                                |                                                                                                                                                                         |      |      |      |      |      |          |      |          |
|----------------------------------------------------------------------------------------------------------------------------------------------------------------|-------------------------------------------------------------------------------------------------------------------------------------------------------------------------|------|------|------|------|------|----------|------|----------|
| curacy=0.999<br>cb8564_c36689/f1p1/2368<br>isoform=cb8564_c36689;full_length_coverage=1;non_full_length_coverage=1;isoform_length=2368;expected_accuracy=0.991 | curacy=0.997<br>gnl BL_ORD_ID 55213 cb8564_c35568/f1p0/2997                                                                                                             | 1    | 1709 | 1706 | 2368 | 13   | 172<br>4 | 2223 | 288<br>5 |
| cb8564_c87466/f1p1/3006<br>isoform=cb8564_c87466;full_length_coverage=1;non_full_length_coverage=1;isoform_length=3006;expected_accuracy=0.994                 | gnl BL_ORD_ID 16879      cb8564_c48606/f1p1/3308<br>isoform=cb8564_c48606;full_length_coverage=1;non_full_length_coverage=1;isoform_length=3308;expected_accuracy=0.998 | 1    | 2169 | 2165 | 2900 | 1    | 215<br>1 | 2587 | 330<br>8 |
| cb8564_c53418/f1p0/2602<br>isoform=cb8564_c53418;full_length_coverage=1;non_full_length_coverage=0;isoform_length=2602;expected_accuracy=0.991                 | gnl BL_ORD_ID 55780 cb8564_c36000/f1p16/3134                                                                                                                            | 1163 | 2499 | 1    | 1168 | 1366 | 27       | 2634 | 146<br>7 |
| cb2737_c63/f1p2/2799<br>isoform=cb2737_c63;full_length_coverage=1;non_full_length_coverage=2;isoform_length=2799;expected_accuracy=0.994                       | gnl BL_ORD_ID 38133      cb2737_c21/f1p2/3479<br>isoform=cb2737_c21;full_length_coverage=1;non_full_length_coverage=2;isoform_length=3479;expected_accuracy=1.000       | 109  | 1514 | 1512 | 2798 | 596  | 200<br>3 | 2135 | 343<br>1 |
| cb8564_c181853/f1p0/2119<br>isoform=cb8564_c181853;full_length_coverage=1;non_full_length_coverage=0;isoform_length=2119;expected_accuracy=0.997               | gnl BL_ORD_ID 55607 cb8564_c46612/f1p1/3367                                                                                                                             | 1    | 1339 | 1334 | 2119 | 8    | 134<br>5 | 2174 | 296<br>4 |
| cb322_c9/f2p0/3136<br>isoform=cb322_c9;full_length_coverage=2;non_full_length_coverage=0;isoform_length=3136;expected_accuracy=1.000                           | gnl BL_ORD_ID 69561 cb322_c28/f1p0/3948                                                                                                                                 | 1    | 2718 | 2718 | 3136 | 153  | 286<br>6 | 3355 | 377<br>3 |
| cb8564_c107625/f7p0/2800                                                                                                                                       | gnl BL_ORD_ID 57052 cb8564_c81772/f1p0/3125                                                                                                                             | 1264 | 2797 | 1    | 1265 | 1614 | 314      | 247  | 1511     |

|                                                                                                                      |                                                                                                                     |                         |     |      |      |      |      |      |      |      |
|----------------------------------------------------------------------------------------------------------------------|---------------------------------------------------------------------------------------------------------------------|-------------------------|-----|------|------|------|------|------|------|------|
| isoform=cb8564_c107625;full_length_coverage=7;non_full_length_coverage=0;isoform_length=2800;expected_accuracy=1.000 |                                                                                                                     |                         |     |      |      |      |      | 8    |      |      |
| cb8564_c85037/f2p2/3207                                                                                              | gnl BL_ORD_ID 15377                                                                                                 | cb8564_c35188/f1p4/3470 |     |      |      |      |      |      |      |      |
| isoform=cb8564_c85037;full_length_coverage=2;non_full_length_coverage=2;isoform_length=3207;expected_accuracy=0.997  | isoform=cb8564_c35188;full_length_coverage=1;non_full_length_coverage=4;isoform_length=3470;expected_accuracy=0.995 |                         | 2   | 2131 | 2131 | 3207 | 1    | 2129 | 2293 | 3368 |
| cb2966_c0/f3p0/2527                                                                                                  | gnl BL_ORD_ID 70108                                                                                                 | cb2966_c2/f1p0/3755     |     |      |      |      |      |      |      |      |
| isoform=cb2966_c0;full_length_coverage=3;non_full_length_coverage=0;isoform_length=2527;expected_accuracy=1.000      |                                                                                                                     |                         | 163 | 2440 | 1    | 166  | 1388 | 3665 | 1    | 163  |
| cb5643_c92/f1p0/2723                                                                                                 | gnl BL_ORD_ID 45379                                                                                                 | cb5643_c25/f1p0/3322    |     |      |      |      |      |      |      |      |
|                                                                                                                      | isoform=cb5643_c25;full_length_coverage=1;non_full_length_coverage=0;isoform_length=3322;expected_accuracy=0.998    |                         | 110 | 2633 | 1    | 112  | 799  | 3322 | 1    | 111  |
| cb3769_c4/f1p0/3111                                                                                                  | gnl BL_ORD_ID 40981                                                                                                 | cb3769_c3/f1p0/3241     |     |      |      |      |      |      |      |      |
|                                                                                                                      | isoform=cb3769_c3;full_length_coverage=1;non_full_length_coverage=0;isoform_length=3241;expected_accuracy=0.995     |                         | 12  | 2376 | 2375 | 2961 | 17   | 2407 | 2657 | 3240 |
| cb8564_c5070/f1p0/2861                                                                                               | gnl BL_ORD_ID 55743                                                                                                 | cb8564_c6593/f1p1/2865  |     |      |      |      |      |      |      |      |
| cb2737_c26/f1p0/2992                                                                                                 |                                                                                                                     |                         | 10  | 1660 | 1659 | 2831 | 55   | 1703 | 1596 | 2768 |
| isoform=cb2737_c26;full_length_coverage=1;non_full_length_coverage=0;isoform_length=2992;expected_accuracy=0.996     | gnl BL_ORD_ID 68777                                                                                                 | cb2737_c19/f1p0/3583    |     |      |      |      |      |      |      |      |
|                                                                                                                      |                                                                                                                     |                         | 1   | 1804 | 1802 | 2992 | 402  | 2205 | 2337 | 3550 |
| cb2156_c24/f1p1/2545                                                                                                 | gnl BL_ORD_ID 66761                                                                                                 | cb2156_c22/f1p1/3698    |     |      |      |      |      |      |      |      |
|                                                                                                                      |                                                                                                                     |                         | 1   | 1422 | 1420 | 2545 | 849  | 228  | 2405 | 353  |

|                                                                                                                  |                     |                         |                                                                                                                      |      |      |      |      |      |          |      |          |
|------------------------------------------------------------------------------------------------------------------|---------------------|-------------------------|----------------------------------------------------------------------------------------------------------------------|------|------|------|------|------|----------|------|----------|
| isoform=cb2156_c24;full_length_coverage=1;non_full_length_coverage=1;isoform_length=2545;expected_accuracy=0.991 |                     |                         |                                                                                                                      |      |      |      |      | 0    |          | 2    |          |
| cb17345_c9/f1p0/2238                                                                                             | gnl BL_ORD_ID 32580 | cb17345_c8/f1p0/3246    | isoform=cb17345_c8;full_length_coverage=1;non_full_length_coverage=0;isoform_length=3246;expected_accuracy=0.997     | 1    | 1617 | 1614 | 2223 | 4    | 162<br>1 | 2527 | 313<br>5 |
| cb9042_c7/f1p1/1973                                                                                              | gnl BL_ORD_ID 58515 | cb9042_c3/f1p0/2364     | isoform=cb9042_c7;full_length_coverage=1;non_full_length_coverage=1;isoform_length=1973;expected_accuracy=0.993      | 102  | 1970 | 1    | 101  | 336  | 218<br>7 | 5    | 105      |
| cb750_c27/f1p1/4163                                                                                              | gnl BL_ORD_ID 8746  | cb750_c10/f1p0/4646     | isoform=cb750_c27;full_length_coverage=1;non_full_length_coverage=1;isoform_length=4163;expected_accuracy=0.998      | 1814 | 4163 | 114  | 1815 | 2276 | 462<br>3 | 2    | 170<br>7 |
| cb8564_c161530/f1p7/3594                                                                                         | gnl BL_ORD_ID 57396 | cb8564_c91806/f1p1/3620 | isoform=cb8564_c161530;full_length_coverage=1;non_full_length_coverage=7;isoform_length=3594;expected_accuracy=0.999 | 132  | 2864 | 2862 | 3594 | 13   | 274<br>5 | 2895 | 362<br>2 |
| cb6063_c19/f1p1/2514                                                                                             | gnl BL_ORD_ID 45238 | cb6063_c0/f15p2/2941    | isoform=cb6063_c0;full_length_coverage=15;non_full_length_coverage=2;isoform_length=2941;expected_accuracy=1.000     | 157  | 2441 | 1    | 156  | 657  | 294<br>0 | 1    | 154      |
| cb249_c10/f1p0/1963                                                                                              | gnl BL_ORD_ID 38949 | cb249_c1/f2p0/2671      | isoform=cb249_c10;full_length_coverage=1;non_full_length_coverage=0;isoform_length=1963;expected_accuracy=0.999      | 1    | 1494 | 1492 | 1963 | 354  | 184<br>9 | 2119 | 259<br>0 |

|                                                                                                                                                     |                                                                                                                                                                    |      |      |      |      |      |      |      |      |
|-----------------------------------------------------------------------------------------------------------------------------------------------------|--------------------------------------------------------------------------------------------------------------------------------------------------------------------|------|------|------|------|------|------|------|------|
| acy=0.992<br>cb3119_c2/f1p0/2612<br>isoform=cb3119_c2;full_length_coverage=1;non_full_length_coverage=0;isoform_length=2612;expected_accuracy=0.999 | y=1.000<br>gnl BL_ORD_ID 69147 cb3119_c7/f1p0/3565                                                                                                                 | 1    | 1765 | 1764 | 2612 | 5    | 1788 | 2033 | 2882 |
| cb1333_c9/f4p0/1480<br>isoform=cb1333_c9;full_length_coverage=4;non_full_length_coverage=0;isoform_length=1480;expected_accuracy=1.000              | gnl BL_ORD_ID 61259 cb1333_c109/f1p0/5379                                                                                                                          | 153  | 1473 | 29   | 154  | 3609 | 4925 | 23   | 148  |
| cb8564_c147327/f4p0/3198<br>isoform=cb8564_c147327;full_length_coverage=4;non_full_length_coverage=0;isoform_length=3198;expected_accuracy=0.999    | gnl BL_ORD_ID 57195 cb8564_c86311/f1p1/3790                                                                                                                        | 1491 | 3197 | 146  | 1493 | 1919 | 3625 | 415  | 1762 |
| cb8564_c51035/f2p2/4216<br>isoform=cb8564_c51035;full_length_coverage=2;non_full_length_coverage=2;isoform_length=4216;expected_accuracy=0.999      | gnl BL_ORD_ID 16628 cb8564_c47737/f7p5/4351<br>isoform=cb8564_c47737;full_length_coverage=7;non_full_length_coverage=5;isoform_length=4351;expected_accuracy=0.998 | 286  | 4215 | 1    | 287  | 404  | 4339 | 1    | 286  |
| cb4211_c2/f2p1/1162<br>isoform=cb4211_c2;full_length_coverage=2;non_full_length_coverage=1;isoform_length=1162;expected_accuracy=1.000              | gnl BL_ORD_ID 71851 cb4211_c4/f1p2/3385                                                                                                                            | 124  | 1162 | 2    | 126  | 2198 | 3236 | 5    | 129  |
| cb8564_c84130/f1p2/3574<br>isoform=cb8564_c84130;full_length_coverage=1;non_full_length_coverage=2;isoform_length=3574;expected_accuracy=0.995      | gnl BL_ORD_ID 55542 cb8564_c44720/f1p0/4093                                                                                                                        | 125  | 3511 | 1    | 127  | 556  | 3938 | 7    | 132  |
| cb3339_c5/f1p1/3094                                                                                                                                 | gnl BL_ORD_ID 40811 cb3339_c2/f1p1/3653                                                                                                                            | 1    | 1878 | 1878 | 2998 | 1    | 186  | 2340 | 346  |



|                         |                                                                                                                                                                                         |     |      |      |      |     |      |      |      |
|-------------------------|-----------------------------------------------------------------------------------------------------------------------------------------------------------------------------------------|-----|------|------|------|-----|------|------|------|
|                         | isoform=cb3339_c2;full_length_coverage=1;non_full_length_coverage=1;isoform_length=3653;expected_accuracy=0.997                                                                         |     |      |      |      |     |      | 4    | 0    |
| cb1030_c21/f1p1/3050    | gnl BL_ORD_ID 1808                      cb1030_c5/f2p0/3347<br>isoform=cb1030_c5;full_length_coverage=2;non_full_length_coverage=0;isoform_length=3347;expected_accuracy=0.997          | 28  | 2802 | 2805 | 2966 | 1   | 2774 | 2900 | 3060 |
| cb8564_c44698/f1p5/2843 | gnl BL_ORD_ID 15153                      cb8564_c36883/f1p0/3072<br>isoform=cb8564_c44698;full_length_coverage=1;non_full_length_coverage=5;isoform_length=2843;expected_accuracy=0.997 | 1   | 2516 | 2511 | 2843 | 1   | 2513 | 2634 | 2968 |
| cb5290_c45/f1p0/2555    | gnl BL_ORD_ID 73746                      cb5290_c79/f1p0/2804                                                                                                                           | 507 | 2567 | 88   | 512  | 646 | 2706 | 26   | 450  |
| cb5633_c81/f1p0/2727    | gnl BL_ORD_ID 45725                      cb5633_c20/f1p1/2973<br>isoform=cb5633_c81;full_length_coverage=1;non_full_length_coverage=0;isoform_length=2727;expected_accuracy=0.992       | 1   | 2007 | 2006 | 2721 | 61  | 1988 | 2292 | 2973 |
| cb5550_c11/f1p0/2859    | gnl BL_ORD_ID 45197                      cb5550_c10/f1p0/4832<br>isoform=cb5550_c11;full_length_coverage=1;non_full_length_coverage=0;isoform_length=2859;expected_accuracy=0.994       | 1   | 2505 | 2500 | 2787 | 94  | 2599 | 4545 | 4832 |
| cb3892_c1/f3p0/2858     | gnl BL_ORD_ID 40678                      cb3892_c5/f1p0/3003<br>isoform=cb3892_c1;full_length_coverage=3;non_full_length_coverage=0;isoform_length=2858;expected_accuracy=0.995         | 184 | 2850 | 1    | 185  | 335 | 3003 | 1    | 186  |
| cb8564_c36689/f1p1/2368 | gnl BL_ORD_ID 10510                      cb8564_c111713/f6p2/3032                                                                                                                       | 1   | 1709 | 1706 | 2368 | 1   | 167  | 2171 | 283  |

|                                                                                                                                        |                                                                                                                                                                    |     |      |      |      |      |     |      |     |   |
|----------------------------------------------------------------------------------------------------------------------------------------|--------------------------------------------------------------------------------------------------------------------------------------------------------------------|-----|------|------|------|------|-----|------|-----|---|
| isoform=cb8564_c36689;full_length_coverage=1;non_full_length_coverage=1;isoform_length=2368;expected_accuracy=0.991                    | isoform=cb8564_c111713;full_length_coverage=6;non_full_length_coverage=2;isoform_length=3032;expected_accuracy=0.998                                               |     |      |      |      |      |     | 2    |     | 4 |
| cb8564_c38035/f1p0/2770                                                                                                                | gnl BL_ORD_ID 56641 cb8564_c50309/f1p5/3075                                                                                                                        | 1   | 2035 | 2033 | 2752 | 1    | 203 | 2227 | 294 | 7 |
| cb5960_c4/f1p0/2967                                                                                                                    | gnl BL_ORD_ID 74709 cb5960_c13/f1p0/3400                                                                                                                           | 15  | 1974 | 1972 | 2634 | 26   | 198 | 2733 | 339 | 5 |
| cb16052_c16/f1p0/1872                                                                                                                  | gnl BL_ORD_ID 17604 cb8564_c89610/f1p0/1980<br>isoform=cb8564_c89610;full_length_coverage=1;non_full_length_coverage=0;isoform_length=1980;expected_accuracy=0.999 | 157 | 1720 | 1    | 160  | 417  | 198 | 43   | 202 | 0 |
| cb1666_c5/f1p3/2503<br>isoform=cb1666_c5;full_length_coverage=1;non_full_length_coverage=3;isoform_length=2503;expected_accuracy=0.995 | gnl BL_ORD_ID 33313 cb1666_c3/f1p1/4226<br>isoform=cb1666_c3;full_length_coverage=1;non_full_length_coverage=1;isoform_length=4226;expected_accuracy=0.997         | 533 | 2399 | 7    | 535  | 2360 | 422 | 1    | 524 | 6 |
| cb8564_c71815/f1p0/2753                                                                                                                | gnl BL_ORD_ID 57875 cb8564_c83119/f1p1/3046                                                                                                                        | 1   | 1377 | 1372 | 2485 | 29   | 140 | 1639 | 275 | 5 |
| cb3226_c5/f2p0/2559<br>isoform=cb3226_c5;full_length_coverage=2;non_full_length_coverage=0;isoform_length=2559;expected_accuracy=1.000 | gnl BL_ORD_ID 39534 cb3226_c8/f1p0/2993<br>isoform=cb3226_c8;full_length_coverage=1;non_full_length_coverage=0;isoform_length=2993;expected_accuracy=0.990         | 1   | 1635 | 1634 | 2530 | 7    | 163 | 2101 | 299 | 4 |
| cb8564_c38035/f1p0/2770                                                                                                                | gnl BL_ORD_ID 55341 cb8564_c38927/f1p0/3326                                                                                                                        | 1   | 2035 | 2033 | 2756 | 7    | 204 | 2233 | 296 | 3 |
| cb8564_c89918/f1p1/2045<br>isoform=cb8564_c89918;full_length_coverage=1;non_full_length_coverage=1;isoform_length=2045;expected_       | gnl BL_ORD_ID 54984 cb8564_c4106/f1p2/2854                                                                                                                         | 1   | 1616 | 1611 | 2045 | 297  | 188 | 2079 | 251 | 4 |

|                                                                                                                                                |                                                                                                                                                                         |     |      |      |      |      |      |      |      |  |
|------------------------------------------------------------------------------------------------------------------------------------------------|-------------------------------------------------------------------------------------------------------------------------------------------------------------------------|-----|------|------|------|------|------|------|------|--|
| accuracy=0.991                                                                                                                                 |                                                                                                                                                                         |     |      |      |      |      |      |      |      |  |
| cb8564_c48538/f1p0/2599                                                                                                                        | gnl BL_ORD_ID 16440      cb8564_c77380/f2p0/3010<br>isoform=cb8564_c77380;full_length_coverage=2;non_full_length_coverage=0;isoform_length=3010;expected_accuracy=0.998 | 554 | 2462 | 81   | 556  | 1082 | 2993 | 170  | 645  |  |
| cb8564_c119687/f1p1/2659                                                                                                                       | gnl BL_ORD_ID 53584      cb8564_c129387/f1p0/3201                                                                                                                       | 16  | 1941 | 1941 | 2650 | 25   | 1949 | 2178 | 2887 |  |
| cb295_c13/f1p1/3878<br>isoform=cb295_c13;full_length_coverage=1;non_full_length_coverage=1;isoform_length=3878;expected_accuracy=0.994         | gnl BL_ORD_ID 34399      cb18646_c1/f2p2/6581<br>isoform=cb18646_c1;full_length_coverage=2;non_full_length_coverage=2;isoform_length=6581;expected_accuracy=0.999       | 1   | 3634 | 3633 | 3878 | 2464 | 6120 | 6227 | 6477 |  |
| cb8564_c34299/f3p1/3910<br>isoform=cb8564_c34299;full_length_coverage=3;non_full_length_coverage=1;isoform_length=3910;expected_accuracy=0.998 | gnl BL_ORD_ID 55790      cb8564_c36942/f1p0/4630                                                                                                                        | 25  | 2794 | 2793 | 3832 | 47   | 2819 | 3325 | 4364 |  |
| cb12363_c5/f1p0/1088<br>isoform=cb12363_c5;full_length_coverage=1;non_full_length_coverage=0;isoform_length=1088;expected_accuracy=1.000       | gnl BL_ORD_ID 49952      cb6700_c1/f1p0/2789                                                                                                                            | 158 | 1036 | 3    | 162  | 1604 | 2482 | 1068 | 1225 |  |
| cb17234_c4/f1p0/1430<br>isoform=cb17234_c4;full_length_coverage=1;non_full_length_coverage=0;isoform_length=1430;expected_accuracy=0.995       | gnl BL_ORD_ID 34066      cb17234_c6/f5p1/1693<br>isoform=cb17234_c6;full_length_coverage=5;non_full_length_coverage=1;isoform_length=1693;expected_accuracy=1.000       | 148 | 1429 | 4    | 148  | 410  | 1691 | 1    | 143  |  |
| cb8564_c3432/f1p0/2118                                                                                                                         | gnl BL_ORD_ID 54595      cb8564_c127586/f1p0/2499                                                                                                                       | 619 | 2090 | 7    | 623  | 745  | 2216 | 13   | 629  |  |
| cb8102_c19/f1p0/1683                                                                                                                           | gnl BL_ORD_ID 8042      cb8102_c20/f21p0/1923                                                                                                                           | 1   | 1128 | 1124 | 1683 | 33   | 1160 | 1339 | 190  |  |



|                                                                                                                                                          |                                                                                                                                                                                        |      |      |      |      |      |          |      |          |
|----------------------------------------------------------------------------------------------------------------------------------------------------------|----------------------------------------------------------------------------------------------------------------------------------------------------------------------------------------|------|------|------|------|------|----------|------|----------|
| accuracy=0.998<br>cb1238_c0/f3p1/2659<br>isoform=cb1238_c0;full_length_coverage=3;non_full_length_coverage=1;isoform_length=2659;expected_accuracy=1.000 | gnl BL_ORD_ID 59301 cb1238_c9/f1p0/4165                                                                                                                                                | 683  | 2659 | 91   | 687  | 2121 | 409<br>7 | 1    | 599      |
| cb3744_c16/f1p0/2234                                                                                                                                     | gnl BL_ORD_ID 39703                      cb3744_c0/f27p2/3071<br>isoform=cb3744_c0;full_length_coverage=27;non_full_length_coverage=2;isoform_length=3071;expected_accuracy=1.000      | 1    | 1429 | 1424 | 1922 | 179  | 160<br>7 | 2573 | 307<br>1 |
| cb12714_c29/f1p2/1583                                                                                                                                    | gnl BL_ORD_ID 55328 cb8564_c38464/f1p0/2918                                                                                                                                            | 1    | 1296 | 1293 | 1526 | 1    | 129<br>6 | 2363 | 259<br>6 |
| cb3485_c2/f3p0/2452<br>isoform=cb3485_c2;full_length_coverage=3;non_full_length_coverage=0;isoform_length=2452;expected_accuracy=1.000                   | gnl BL_ORD_ID 71246 cb3485_c10/f1p0/2515                                                                                                                                               | 677  | 2452 | 84   | 678  | 720  | 249<br>4 | 1    | 597      |
| cb8564_c21138/f1p3/2652                                                                                                                                  | gnl BL_ORD_ID 9350                      cb8564_c11826/f1p0/2916<br>isoform=cb8564_c11826;full_length_coverage=1;non_full_length_coverage=0;isoform_length=2916;expected_accuracy=0.997 | 1292 | 2600 | 1    | 1293 | 1543 | 285<br>3 | 4    | 129<br>6 |
| cb2964_c3/f1p0/1791<br>isoform=cb2964_c3;full_length_coverage=1;non_full_length_coverage=0;isoform_length=1791;expected_accuracy=0.996                   | gnl BL_ORD_ID 37120                      cb2964_c6/f1p0/1936<br>isoform=cb2964_c6;full_length_coverage=1;non_full_length_coverage=0;isoform_length=1936;expected_accuracy=1.000        | 213  | 1791 | 7    | 215  | 325  | 190<br>4 | 1    | 206      |
| cb8564_c116509/f1p0/3009                                                                                                                                 | gnl BL_ORD_ID 9800                      cb8564_c109800/f6p1/3270<br>isoform=cb8564_c109800;full_length_coverage=6;non_full_length_coverage=1;isoform_length=3270;expected_a            | 1    | 2016 | 2015 | 2985 | 13   | 203<br>0 | 2254 | 323<br>0 |

|                         |                                                                                                                                                                    |     |      |      |      |      |          |      |          |  |
|-------------------------|--------------------------------------------------------------------------------------------------------------------------------------------------------------------|-----|------|------|------|------|----------|------|----------|--|
|                         | ccuracy=0.998                                                                                                                                                      |     |      |      |      |      |          |      |          |  |
| cb7493_c4/f1p0/2146     | gnl BL_ORD_ID 50550 cb7493_c3/f1p0/2634                                                                                                                            | 1   | 1712 | 1707 | 2121 | 1    | 170<br>7 | 2004 | 242<br>0 |  |
| cb8564_c40978/f1p0/3073 | gnl BL_ORD_ID 14410 cb8564_c44256/f1p1/3267<br>isoform=cb8564_c44256;full_length_coverage=1;non_full_length_coverage=1;isoform_length=3267;expected_accuracy=0.995 | 1   | 2133 | 2129 | 2845 | 1    | 2119     | 2553 | 326<br>7 |  |
| cb5921_c35/f1p0/2385    | gnl BL_ORD_ID 74654 cb5921_c44/f1p1/2444                                                                                                                           | 11  | 2074 | 2075 | 2226 | 9    | 207<br>0 | 2184 | 233<br>6 |  |
| cb8813_c7/f1p0/1096     | gnl BL_ORD_ID 18429 cb8813_c2/f1p0/2264<br>isoform=cb8813_c2;full_length_coverage=1;non_full_length_coverage=0;isoform_length=2264;expected_accuracy=0.997         | 245 | 1069 | 39   | 246  | 1229 | 205<br>3 | 1    | 206      |  |
| cb9630_c18/f1p1/2469    | isoform=cb9630_c18;full_length_coverage=1;non_full_length_coverage=1;isoform_length=2469;expected_accuracy=0.999                                                   |     |      |      |      |      |          |      |          |  |
| cb2020_c14/f1p0/2216    | gnl BL_ORD_ID 59865 cb9630_c26/f1p0/3573                                                                                                                           | 1   | 1632 | 1631 | 2466 | 1    | 163<br>2 | 2720 | 355<br>5 |  |
| cb2020_c14/f1p0/2216    | isoform=cb2020_c14;full_length_coverage=1;non_full_length_coverage=0;isoform_length=2216;expected_accuracy=0.991                                                   |     |      |      |      |      |          |      |          |  |
| cb8564_c15573/f1p0/3752 | gnl BL_ORD_ID 66612 cb2020_c17/f1p0/2941                                                                                                                           | 1   | 1824 | 1824 | 2197 | 1    | 182<br>2 | 2554 | 292<br>9 |  |
| cb8564_c15573/f1p0/3752 | isoform=cb8564_c15573;full_length_coverage=1;non_full_length_coverage=0;isoform_length=3752;expected_accuracy=0.997                                                |     |      |      |      |      |          |      |          |  |
| cb4552_c3/f1p0/2538     | gnl BL_ORD_ID 13527 cb8564_c21762/f3p4/3985<br>isoform=cb8564_c21762;full_length_coverage=3;non_full_length_coverage=4;isoform_length=3985;expected_accuracy=1.000 | 1   | 2900 | 2896 | 3752 | 13   | 292<br>2 | 3037 | 389<br>4 |  |
| cb4552_c3/f1p0/2538     | gnl BL_ORD_ID 42484 cb4552_c2/f1p0/3315                                                                                                                            | 236 | 2538 | 1    | 237  | 1008 | 331      | 1    | 236      |  |

|                                                                                                                                              |                                                                                                                                                                      |     |      |      |      |      |      |      |      |   |
|----------------------------------------------------------------------------------------------------------------------------------------------|----------------------------------------------------------------------------------------------------------------------------------------------------------------------|-----|------|------|------|------|------|------|------|---|
| isoform=cb4552_c3;full_length_coverage=1;non_full_length_coverage=0;isoform_length=2538;expected_accuracy=0.991<br>cb8564_c50881/f1p2/2125   | isoform=cb4552_c2;full_length_coverage=1;non_full_length_coverage=0;isoform_length=3315;expected_accuracy=0.993<br>gnl BL_ORD_ID 12475      cb8564_c148406/f2p0/2449 |     |      |      |      |      |      |      |      | 3 |
| isoform=cb8564_c50881;full_length_coverage=1;non_full_length_coverage=2;isoform_length=2125;expected_accuracy=0.994<br>cb396_c57/f1p0/2029   | isoform=cb8564_c148406;full_length_coverage=2;non_full_length_coverage=0;isoform_length=2449;expected_accuracy=0.990<br>gnl BL_ORD_ID 39504      cb396_c16/f1p0/2356 | 1   | 1863 | 1858 | 2111 | 49   | 1914 | 2193 | 2449 |   |
| isoform=cb396_c57;full_length_coverage=1;non_full_length_coverage=0;isoform_length=2029;expected_accuracy=0.995<br>cb955_c38/f1p0/2505       | isoform=cb396_c16;full_length_coverage=1;non_full_length_coverage=0;isoform_length=2356;expected_accuracy=1.000<br>gnl BL_ORD_ID 59129      cb955_c25/f1p0/3018      | 1   | 1399 | 1395 | 2029 | 70   | 1446 | 1707 | 2342 |   |
| cb8564_c36731/f1p2/2761                                                                                                                      | gnl BL_ORD_ID 57017      cb8564_c80370/f1p0/3493                                                                                                                     | 14  | 1663 | 1663 | 2327 | 8    | 1657 | 2345 | 3009 |   |
| cb4862_c13/f1p1/2421                                                                                                                         | gnl BL_ORD_ID 42994      cb4862_c9/f1p1/3086                                                                                                                         | 119 | 1977 | 1972 | 2740 | 3085 | 1225 | 796  | 27   |   |
| isoform=cb4862_c13;full_length_coverage=1;non_full_length_coverage=1;isoform_length=2421;expected_accuracy=0.999<br>cb8564_c106911/f7p3/3690 | isoform=cb4862_c9;full_length_coverage=1;non_full_length_coverage=1;isoform_length=3086;expected_accuracy=0.997<br>gnl BL_ORD_ID 10486      cb8564_c107051/f2p1/3797 | 1   | 1384 | 1380 | 2418 | 84   | 1463 | 2039 | 3075 |   |
| isoform=cb8564_c106911;full_length_coverage=7;non_full_length_coverage=3;isoform_length=3690;expected_accuracy=0.998<br>cb2899_c13/f1p0/1590 | isoform=cb8564_c107051;full_length_coverage=2;non_full_length_coverage=1;isoform_length=3797;expected_accuracy=0.997<br>gnl BL_ORD_ID 37043      cb2899_c1/f2p0/1740 | 201 | 3607 | 1    | 203  | 392  | 3797 | 13   | 215  |   |
| isoform=cb2899_c13;full_length_coverage=1;non_full_length_coverage=0;isoform_length=1590;expected_accuracy=0.999                             | isoform=cb2899_c1;full_length_coverage=2;non_full_length_coverage=0;isoform_length=1740;expected_accuracy=0.999                                                      | 97  | 1590 | 1    | 101  | 239  | 1734 | 32   | 132  |   |

|                                                                                                                                                    |                                                                                                                                                                                           |     |      |      |      |      |      |      |      |
|----------------------------------------------------------------------------------------------------------------------------------------------------|-------------------------------------------------------------------------------------------------------------------------------------------------------------------------------------------|-----|------|------|------|------|------|------|------|
| racy=0.995<br>cb315_c1/f1p0/4753<br>isoform=cb315_c1;full_length_coverage=1;non_full_length_coverage=0;isoform_length=4753;expected_accuracy=0.993 | cy=0.994<br>gnl BL_ORD_ID 36651                      cb315_c0/f1p0/4872<br>isoform=cb315_c0;full_length_coverage=1;non_full_length_coverage=0;isoform_length=4872;expected_accuracy=0.992 | 23  | 3890 | 3888 | 4675 | 1    | 3817 | 4102 | 4872 |
| cb2272_c12/f1p0/5238                                                                                                                               | gnl BL_ORD_ID 69666   cb2272_c8/f1p0/6467                                                                                                                                                 | 16  | 2695 | 2691 | 5202 | 135  | 2814 | 3845 | 6356 |
| cb8564_c75364/f1p0/2028                                                                                                                            | gnl BL_ORD_ID 58065   cb8564_c87948/f1p0/3033                                                                                                                                             | 702 | 2038 | 88   | 701  | 1606 | 2942 | 306  | 919  |
| cb2674_c12/f1p0/3677                                                                                                                               | gnl BL_ORD_ID 38975                      cb2674_c31/f35p4/3827<br>isoform=cb2674_c31;full_length_coverage=35;non_full_length_coverage=4;isoform_length=3827;expected_accuracy=1.000       | 1   | 2544 | 2542 | 3643 | 66   | 2612 | 2727 | 3827 |
| cb12931_c15/f1p0/1493<br>isoform=cb12931_c15;full_length_coverage=1;non_full_length_coverage=0;isoform_length=1493;expected_accuracy=1.000         | gnl BL_ORD_ID 55417   cb8564_c41115/f1p3/2751                                                                                                                                             | 1   | 1106 | 1104 | 1485 | 4    | 1105 | 2310 | 2690 |
| cb8564_c2355/f1p4/2493<br>isoform=cb8564_c2355;full_length_coverage=1;non_full_length_coverage=4;isoform_length=2493;expected_accuracy=0.995       | gnl BL_ORD_ID 13611                      cb8564_c2184/f1p0/2606<br>isoform=cb8564_c2184;full_length_coverage=1;non_full_length_coverage=0;isoform_length=2606;expected_accuracy=0.995     | 277 | 2488 | 4    | 277  | 384  | 2601 | 4    | 272  |
| cb8564_c37361/f1p0/3076                                                                                                                            | gnl BL_ORD_ID 16622                      cb8564_c50151/f1p0/3198<br>isoform=cb8564_c50151;full_length_coverage=1;non_full_length_coverage=0;isoform_length=3198;expected_accuracy=0.995   | 1   | 2481 | 2477 | 3068 | 6    | 2506 | 2607 | 3198 |
| cb3518_c21/f1p0/1435                                                                                                                               | gnl BL_ORD_ID 39441                      cb3518_c0/f10p1/1768                                                                                                                             | 104 | 1376 | 1    | 107  | 496  | 176  | 54   | 160  |





|                                                                                                                                               |                                                                                                                                                                                      |     |      |      |      |     |      |      |      |   |
|-----------------------------------------------------------------------------------------------------------------------------------------------|--------------------------------------------------------------------------------------------------------------------------------------------------------------------------------------|-----|------|------|------|-----|------|------|------|---|
| isoform=cb8564_c41930;full_length_coverage=1;non_full_length_coverage=0;isoform_length=3319;expected_accuracy=0.996<br>cb13752_c11/f2p0/1820  | isoform=cb8564_c39484;full_length_coverage=1;non_full_length_coverage=0;isoform_length=3555;expected_accuracy=0.997<br>gnl BL_ORD_ID 25257                      cb13752_c3/f2p0/1870 |     |      |      |      |     |      |      |      | 4 |
| isoform=cb13752_c11;full_length_coverage=2;non_full_length_coverage=0;isoform_length=1820;expected_accuracy=0.996                             | isoform=cb13752_c3;full_length_coverage=2;non_full_length_coverage=0;isoform_length=1870;expected_accuracy=0.995<br>gnl BL_ORD_ID 17429                      cb8564_c85447/f1p0/3196 | 11  | 1613 | 1613 | 1773 | 5   | 1608 | 1708 | 1870 |   |
| cb8564_c50309/f1p5/3075                                                                                                                       | isoform=cb8564_c85447;full_length_coverage=1;non_full_length_coverage=0;isoform_length=3196;expected_accuracy=0.997<br>gnl BL_ORD_ID 21528                      cb9604_c1/f2p0/1964  | 1   | 2419 | 2418 | 2947 | 3   | 2413 | 2660 | 3189 |   |
| cb9604_c7/f1p0/1887                                                                                                                           | isoform=cb9604_c1;full_length_coverage=2;non_full_length_coverage=0;isoform_length=1964;expected_accuracy=0.998                                                                      | 202 | 1798 | 6    | 200  | 366 | 1962 | 27   | 221  |   |
| cb12_c37/f1p0/4067                                                                                                                            | gnl BL_ORD_ID 61092   cb12_c60/f1p0/5175                                                                                                                                             | 286 | 4080 | 186  | 288  | 931 | 4733 | 699  | 801  |   |
| cb8564_c2539/f1p1/2062                                                                                                                        | gnl BL_ORD_ID 54773   cb8564_c2528/f1p0/3357                                                                                                                                         | 1   | 1646 | 1644 | 2062 | 5   | 1645 | 2812 | 3229 |   |
| isoform=cb8564_c2539;full_length_coverage=1;non_full_length_coverage=1;isoform_length=2062;expected_accuracy=0.997<br>cb8564_c45300/f1p4/3014 | gnl BL_ORD_ID 15152                      cb8564_c38629/f2p1/3246                                                                                                                     |     |      |      |      |     |      |      |      |   |
| isoform=cb8564_c45300;full_length_coverage=1;non_full_length_coverage=4;isoform_length=3014;expected_accuracy=0.996                           | isoform=cb8564_c38629;full_length_coverage=2;non_full_length_coverage=1;isoform_length=3246;expected_accuracy=0.993<br>gnl BL_ORD_ID 52607   cb8564_c1007/f1p0/1898                  | 243 | 3014 | 1    | 247  | 420 | 3204 | 1    | 259  |   |
| cb17118_c7/f1p0/1440                                                                                                                          |                                                                                                                                                                                      | 1   | 1141 | 1137 | 1429 | 271 | 1411 | 1596 | 188  |   |

|                                                                                                                                            |                                                                                                                                                                 |     |      |      |      |      |      |      |      |   |
|--------------------------------------------------------------------------------------------------------------------------------------------|-----------------------------------------------------------------------------------------------------------------------------------------------------------------|-----|------|------|------|------|------|------|------|---|
| cb322_c9/f2p0/3136<br>isoform=cb322_c9;full_length_coverage=2;non_full_length_coverage=0;isoform_length=3136;expected_accuracy=1.000       | gnl BL_ORD_ID 41025      cb322_c8/f2p0/3977<br>isoform=cb322_c8;full_length_coverage=2;non_full_length_coverage=0;isoform_length=3977;expected_accuracy=0.999   | 1   | 2718 | 2718 | 3134 | 14   | 2727 | 3560 | 3977 | 8 |
| cb8564_c844/f2p0/2586<br>isoform=cb8564_c844;full_length_coverage=2;non_full_length_coverage=0;isoform_length=2586;expected_accuracy=1.000 | gnl BL_ORD_ID 54919      cb8564_c3679/f1p0/2936                                                                                                                 | 1   | 2343 | 2344 | 2586 | 2    | 2346 | 2460 | 2702 |   |
| cb3671_c20/f2p1/3263<br>isoform=cb3671_c20;full_length_coverage=2;non_full_length_coverage=1;isoform_length=3263;expected_accuracy=0.999   | gnl BL_ORD_ID 71434      cb3671_c14/f1p0/3470                                                                                                                   | 1   | 2858 | 2858 | 3211 | 79   | 2940 | 3119 | 3472 |   |
| cb6968_c6/f1p0/2273<br>isoform=cb6968_c6;full_length_coverage=1;non_full_length_coverage=0;isoform_length=2273;expected_accuracy=0.996     | gnl BL_ORD_ID 4815      cb6968_c3/f2p0/2613<br>isoform=cb6968_c3;full_length_coverage=2;non_full_length_coverage=0;isoform_length=2613;expected_accuracy=0.994  | 185 | 2273 | 1    | 185  | 423  | 2511 | 79   | 264  |   |
| cb7337_c6/f1p0/1841<br>isoform=cb7337_c6;full_length_coverage=1;non_full_length_coverage=0;isoform_length=1841;expected_accuracy=0.992     | gnl BL_ORD_ID 50485      cb7337_c3/f1p0/2569                                                                                                                    | 1   | 1684 | 1682 | 1841 | 10   | 1695 | 1805 | 1963 |   |
| cb4444_c10/f1p0/1986<br>isoform=cb4444_c10;full_length_coverage=1;non_full_length_coverage=0;isoform_length=1986;expected_accuracy=0.996   | gnl BL_ORD_ID 43661      cb4444_c6/f1p0/3234<br>isoform=cb4444_c6;full_length_coverage=1;non_full_length_coverage=0;isoform_length=3234;expected_accuracy=0.990 | 350 | 1986 | 5    | 349  | 1539 | 3178 | 18   | 359  |   |
| cb8564_c181853/f1p0/2119                                                                                                                   | gnl BL_ORD_ID 13512      cb8564_c186209/f1p0/2931                                                                                                               | 1   | 1339 | 1334 | 2117 | 1    | 134  | 2148 | 293  |   |

|                                                                                                                                                |                                                                                                                                                            |     |      |      |      |     |      |      |      |   |
|------------------------------------------------------------------------------------------------------------------------------------------------|------------------------------------------------------------------------------------------------------------------------------------------------------------|-----|------|------|------|-----|------|------|------|---|
| isoform=cb8564_c181853;full_length_coverage=1;non_full_length_coverage=0;isoform_length=2119;expected_accuracy=0.997<br>cb8564_c4750/f1p1/2456 | isoform=cb8564_c186209;full_length_coverage=1;non_full_length_coverage=0;isoform_length=2931;expected_accuracy=0.996                                       |     |      |      |      |     |      | 1    |      | 1 |
| isoform=cb8564_c4750;full_length_coverage=1;non_full_length_coverage=1;isoform_length=2456;expected_accuracy=0.993<br>cb354_c0/f2p0/4074       | gnl BL_ORD_ID 55688 cb8564_c4747/f1p0/2838                                                                                                                 | 1   | 1330 | 1328 | 2367 | 224 | 1559 | 1807 | 2853 |   |
| isoform=cb354_c0;full_length_coverage=2;non_full_length_coverage=0;isoform_length=4074;expected_accuracy=0.994<br>cb1656_c9/f1p1/3733          | gnl BL_ORD_ID 70822 cb354_c1/f1p0/4589                                                                                                                     | 284 | 4074 | 154  | 287  | 503 | 4300 | 3    | 136  |   |
| isoform=cb1656_c9;full_length_coverage=1;non_full_length_coverage=1;isoform_length=3733;expected_accuracy=0.992<br>cb7484_c4/f1p0/2339         | gnl BL_ORD_ID 31007 cb1656_c7/f1p1/3974<br>isoform=cb1656_c7;full_length_coverage=1;non_full_length_coverage=1;isoform_length=3974;expected_accuracy=0.997 | 1   | 2973 | 2974 | 3730 | 42  | 2976 | 3114 | 3866 |   |
| cb7484_c4/f1p0/2339                                                                                                                            | gnl BL_ORD_ID 7223 cb7484_c2/f1p0/2401<br>isoform=cb7484_c2;full_length_coverage=1;non_full_length_coverage=0;isoform_length=2401;expected_accuracy=0.996  | 1   | 1568 | 1567 | 2242 | 6   | 1572 | 1726 | 2401 |   |
| cb8160_c2/f1p0/2208                                                                                                                            | gnl BL_ORD_ID 6487 cb8160_c1/f1p1/2577<br>isoform=cb8160_c1;full_length_coverage=1;non_full_length_coverage=1;isoform_length=2577;expected_accuracy=0.997  | 99  | 2208 | 1    | 100  | 379 | 2492 | 79   | 178  |   |
| cb18456_c4245/f1p0/1080                                                                                                                        | gnl BL_ORD_ID 67489 cb18456_c4062/f1p3/1349                                                                                                                | 7   | 512  | 508  | 1079 | 1   | 494  | 603  | 1185 |   |
| cb8564_c72349/f1p0/3248                                                                                                                        | gnl BL_ORD_ID 55538 cb8564_c44621/f1p1/3432                                                                                                                | 1   | 2662 | 2659 | 3068 | 104 | 2765 | 2924 | 3333 |   |

|                          |                                                                                                                                                                              |      |      |      |      |      |      |      |      |
|--------------------------|------------------------------------------------------------------------------------------------------------------------------------------------------------------------------|------|------|------|------|------|------|------|------|
| cb2996_c4/f1p0/2559      | gnl BL_ORD_ID 39036          cb2996_c1/f1p0/3750<br>isoform=cb2996_c1;full_length_coverage=1;non_full_length_coverage=0;isoform_length=3750;expected_accuracy=0.996          | 1106 | 2505 | 1    | 1107 | 2353 | 3750 | 51   | 1155 |
| cb8258_c9/f1p0/2131      | gnl BL_ORD_ID 7647          cb8258_c13/f1p0/2409<br>isoform=cb8258_c9;full_length_coverage=1;non_full_length_coverage=0;isoform_length=2131;expected_accuracy=0.991          | 1    | 1687 | 1685 | 2131 | 161  | 1858 | 1960 | 2408 |
| cb8564_c46484/f1p0/3151  | gnl BL_ORD_ID 55195          cb8564_c35170/f1p0/3386                                                                                                                         | 423  | 3086 | 5    | 422  | 738  | 3399 | 103  | 497  |
| cb8564_c31961/f6p0/2803  | gnl BL_ORD_ID 18405          cb8564_c81089/f1p1/2976<br>isoform=cb8564_c31961;full_length_coverage=6;non_full_length_coverage=0;isoform_length=2803;expected_accuracy=1.000  | 102  | 1525 | 1526 | 2803 | 1    | 1427 | 1670 | 2946 |
| cb8564_c178226/f1p0/2728 | gnl BL_ORD_ID 55574          cb8564_c45699/f1p0/3005<br>isoform=cb8564_c178226;full_length_coverage=1;non_full_length_coverage=0;isoform_length=2728;expected_accuracy=0.998 | 1284 | 2728 | 1    | 1288 | 1404 | 2846 | 1    | 1300 |
| cb2869_c15/f1p1/3426     | gnl BL_ORD_ID 70052          cb2869_c11/f1p0/3673<br>isoform=cb2869_c15;full_length_coverage=1;non_full_length_coverage=1;isoform_length=3426;expected_accuracy=0.994        | 1    | 2078 | 2077 | 3382 | 25   | 2092 | 2371 | 3673 |
| cb373_c29/f1p0/4336      | gnl BL_ORD_ID 40118          cb373_c48/f1p0/5064<br>isoform=cb373_c48;full_length_coverage=1;non_full_length_coverage=0;isoform_length=5064;expected_accuracy=0.992          | 16   | 3532 | 3532 | 3924 | 418  | 3919 | 4057 | 4448 |

|                          |                                                                                                                                                                         |     |      |      |      |      |          |      |          |
|--------------------------|-------------------------------------------------------------------------------------------------------------------------------------------------------------------------|-----|------|------|------|------|----------|------|----------|
| cb8564_c150564/f1p2/1934 | gnl BL_ORD_ID 16400      cb8564_c4928/f2p0/2999<br>isoform=cb8564_c4928;full_length_coverage=2;non_full_length_coverage=0;isoform_length=2999;expected_accuracy=0.997   | 259 | 1944 | 78   | 259  | 1314 | 299<br>9 | 1    | 182      |
| cb12714_c29/f1p2/1583    | gnl BL_ORD_ID 13363      cb8564_c20575/f1p0/3783<br>isoform=cb8564_c20575;full_length_coverage=1;non_full_length_coverage=0;isoform_length=3783;expected_accuracy=0.997 | 1   | 1295 | 1293 | 1590 | 1    | 129<br>5 | 3486 | 378<br>3 |
| cb8564_c16669/f1p0/2894  | gnl BL_ORD_ID 11871      cb8564_c14157/f1p1/4319<br>isoform=cb8564_c14157;full_length_coverage=1;non_full_length_coverage=1;isoform_length=4319;expected_accuracy=0.996 | 1   | 1723 | 1721 | 2706 | 782  | 250<br>4 | 3317 | 430<br>4 |
| cb11941_c14/f1p0/1335    | gnl BL_ORD_ID 24140      cb11941_c6/f2p1/1361<br>isoform=cb11941_c6;full_length_coverage=2;non_full_length_coverage=1;isoform_length=1361;expected_accuracy=0.999       | 172 | 1207 | 24   | 173  | 326  | 136<br>1 | 10   | 159      |
| cb5131_c4/f1p0/1785      | gnl BL_ORD_ID 44116      cb5131_c0/f1p0/3173<br>isoform=cb5131_c4;full_length_coverage=1;non_full_length_coverage=0;isoform_length=1785;expected_accuracy=0.993         | 1   | 1072 | 1070 | 1785 | 580  | 164<br>4 | 2450 | 317<br>2 |
| cb8564_c90171/f1p0/2007  | gnl BL_ORD_ID 17044      cb8564_c77203/f2p0/2820<br>isoform=cb8564_c90171;full_length_coverage=1;non_full_length_coverage=0;isoform_length=2007;expected_accuracy=1.000 | 1   | 1632 | 1627 | 2007 | 1    | 163<br>1 | 2233 | 261<br>3 |
| cb322_c9/f2p0/3136       | gnl BL_ORD_ID 40333      cb322_c18/f1p0/4294<br>isoform=cb322_c9;full_length_coverage=2;non_full_length_coverage=1;isoform_length=4294;expected_accuracy=0.996          | 1   | 2718 | 2718 | 3136 | 21   | 274<br>9 | 3239 | 365<br>8 |

|                                                                                                                                                |                                                                                                                                                                    |     |      |      |      |      |      |      |      |  |  |
|------------------------------------------------------------------------------------------------------------------------------------------------|--------------------------------------------------------------------------------------------------------------------------------------------------------------------|-----|------|------|------|------|------|------|------|--|--|
| gth_coverage=0;isoform_length=3136;expected_accuracy=1.000                                                                                     | gth_coverage=0;isoform_length=4294;expected_accuracy=0.994                                                                                                         |     |      |      |      |      |      |      |      |  |  |
| cb8564_c124137/f1p0/2382                                                                                                                       | gnl BL_ORD_ID 52866 cb8564_c110370/f1p0/3044                                                                                                                       | 299 | 2372 | 4    | 300  | 828  | 2903 | 9    | 307  |  |  |
| cb6028_c5/f1p0/2368<br>isoform=cb6028_c5;full_length_coverage=1;non_full_length_coverage=0;isoform_length=2368;expected_accuracy=0.994         | gnl BL_ORD_ID 45124 cb6028_c3/f1p0/2608<br>isoform=cb6028_c3;full_length_coverage=1;non_full_length_coverage=0;isoform_length=2608;expected_accuracy=0.994         | 1   | 1616 | 1616 | 2339 | 1    | 1617 | 1887 | 2608 |  |  |
| cb8564_c1403/f1p0/2069                                                                                                                         | gnl BL_ORD_ID 11763 cb8564_c1402/f1p0/2306<br>isoform=cb8564_c1402;full_length_coverage=1;non_full_length_coverage=0;isoform_length=2306;expected_accuracy=0.997   | 1   | 1734 | 1733 | 2066 | 56   | 1799 | 1949 | 2284 |  |  |
| cb8564_c69018/f2p1/2753<br>isoform=cb8564_c69018;full_length_coverage=2;non_full_length_coverage=1;isoform_length=2753;expected_accuracy=0.991 | gnl BL_ORD_ID 16392 cb8564_c76010/f1p0/3693<br>isoform=cb8564_c76010;full_length_coverage=1;non_full_length_coverage=0;isoform_length=3693;expected_accuracy=0.993 | 489 | 2753 | 81   | 490  | 1422 | 3691 | 1    | 410  |  |  |
| cb12_c30/f1p2/4443<br>isoform=cb12_c30;full_length_coverage=1;non_full_length_coverage=2;isoform_length=4443;expected_accuracy=0.992           | gnl BL_ORD_ID 25321 cb12_c54/f1p0/8058<br>isoform=cb12_c54;full_length_coverage=1;non_full_length_coverage=0;isoform_length=8058;expected_accuracy=0.994           | 369 | 4371 | 1    | 373  | 4054 | 8058 | 1346 | 1723 |  |  |
| cb9933_c3/f1p0/1921                                                                                                                            | gnl BL_ORD_ID 20310 cb9933_c4/f1p0/1991<br>isoform=cb9933_c4;full_length_coverage=1;non_full_length_coverage=0;isoform_length=1991;expected_accuracy=1.000         | 138 | 1798 | 11   | 138  | 273  | 1933 | 1    | 122  |  |  |
| cb5229_c12/f14p1/1035<br>isoform=cb5229_c12;full_length_coverage=14;non_full                                                                   | gnl BL_ORD_ID 44594 cb5229_c13/f1p1/2074<br>isoform=cb5229_c13;full_length_coverage=1;non_full                                                                     | 369 | 1035 | 8    | 371  | 1406 | 2073 | 1    | 366  |  |  |

|                                                                                                                                                  |                                                                                                                                                                         |     |      |      |      |     |      |      |      |  |  |
|--------------------------------------------------------------------------------------------------------------------------------------------------|-------------------------------------------------------------------------------------------------------------------------------------------------------------------------|-----|------|------|------|-----|------|------|------|--|--|
| _length_coverage=1;isoform_length=1035;expected_accuracy=1.000                                                                                   | ength_coverage=1;isoform_length=2074;expected_accuracy=0.999                                                                                                            |     |      |      |      |     |      |      |      |  |  |
| cb8564_c4961/f1p0/2082                                                                                                                           | gnl BL_ORD_ID 53421 cb8564_c124689/f1p0/2316                                                                                                                            | 212 | 2078 | 54   | 212  | 362 | 2228 | 17   | 174  |  |  |
| cb8564_c145840/f9p2/3901<br>isoform=cb8564_c145840;full_length_coverage=9;non_full_length_coverage=2;isoform_length=3901;expected_accuracy=0.999 | gnl BL_ORD_ID 13983      cb8564_c40988/f2p0/4134<br>isoform=cb8564_c40988;full_length_coverage=2;non_full_length_coverage=0;isoform_length=4134;expected_accuracy=0.999 | 228 | 3884 | 15   | 229  | 477 | 4132 | 1    | 216  |  |  |
| cb14323_c0/f7p0/1360<br>isoform=cb14323_c0;full_length_coverage=7;non_full_length_coverage=0;isoform_length=1360;expected_accuracy=1.000         | gnl BL_ORD_ID 63229 cb14323_c6/f1p0/1451                                                                                                                                | 100 | 1357 | 1    | 101  | 198 | 1449 | 2    | 98   |  |  |
| cb2707_c17/f1p1/3162<br>isoform=cb2707_c17;full_length_coverage=1;non_full_length_coverage=1;isoform_length=3162;expected_accuracy=0.995         | gnl BL_ORD_ID 36995      cb2707_c28/f1p1/3570<br>isoform=cb2707_c28;full_length_coverage=1;non_full_length_coverage=1;isoform_length=3570;expected_accuracy=0.996       | 11  | 2572 | 2575 | 3118 | 317 | 2879 | 3014 | 3559 |  |  |
| cb2316_c8/f1p0/3795                                                                                                                              | gnl BL_ORD_ID 69692 cb2316_c1/f1p0/3976                                                                                                                                 | 3   | 3314 | 3313 | 3599 | 1   | 3311 | 3698 | 3998 |  |  |
| cb8564_c43779/f1p0/3021<br>isoform=cb8564_c43779;full_length_coverage=1;non_full_length_coverage=0;isoform_length=3021;expected_accuracy=0.993   | gnl BL_ORD_ID 14539      cb8564_c46562/f2p3/3196<br>isoform=cb8564_c46562;full_length_coverage=2;non_full_length_coverage=3;isoform_length=3196;expected_accuracy=0.995 | 1   | 2344 | 2345 | 3017 | 7   | 2369 | 2525 | 3195 |  |  |
| cb8564_c45300/f1p4/3014<br>isoform=cb8564_c45300;full_length_coverage=1;non_full_length_coverage=4;isoform_length=3014;expected_accuracy=0.996   | gnl BL_ORD_ID 55522 cb8564_c44123/f1p1/3230                                                                                                                             | 243 | 3014 | 16   | 246  | 398 | 3169 | 15   | 242  |  |  |



|                         |                                                                                                                                                                                         |      |      |      |      |      |      |      |      |
|-------------------------|-----------------------------------------------------------------------------------------------------------------------------------------------------------------------------------------|------|------|------|------|------|------|------|------|
| cb7189_c8/f1p0/2376     | gnl BL_ORD_ID 9014                      cb7189_c16/f9p1/2273<br>isoform=cb7189_c16;full_length_coverage=9;non_full_length_coverage=1;isoform_length=2273;expected_accuracy=1.000        | 1    | 1304 | 1304 | 2063 | 316  | 1619 | 1514 | 2273 |
| cb6904_c3/f4p5/1797     | gnl BL_ORD_ID 4313                      cb6904_c8/f1p1/2657<br>isoform=cb6904_c3;full_length_coverage=4;non_full_length_coverage=5;isoform_length=1797;expected_accuracy=1.000          | 395  | 1797 | 82   | 397  | 1242 | 2644 | 1    | 314  |
| cb8564_c40107/f1p0/4108 | gnl BL_ORD_ID 14247                      cb8564_c45575/f3p6/4033<br>isoform=cb8564_c45575;full_length_coverage=3;non_full_length_coverage=6;isoform_length=4033;expected_accuracy=0.998 | 1603 | 3955 | 1    | 1599 | 1558 | 3910 | 78   | 1678 |
| cb8564_c21500/f1p0/4129 | gnl BL_ORD_ID 66126   cb18041_c3/f1p0/5098<br>isoform=cb8564_c21500;full_length_coverage=1;non_full_length_coverage=0;isoform_length=4129;expected_accuracy=0.999                       | 332  | 4129 | 1    | 331  | 998  | 4800 | 468  | 800  |
| cb9666_c3/f1p0/1777     | gnl BL_ORD_ID 58842   cb9666_c1/f1p0/2225<br>isoform=cb9666_c3;full_length_coverage=1;non_full_length_coverage=0;isoform_length=1777;expected_accuracy=0.999                            | 1    | 1268 | 1268 | 1777 | 77   | 1356 | 1690 | 2201 |
| cb7420_c0/f7p1/2477     | gnl BL_ORD_ID 51217   cb7420_c9/f1p0/3428<br>isoform=cb7420_c0;full_length_coverage=7;non_full_length_coverage=1;isoform_length=2477;expected_accuracy=1.000                            | 18   | 1886 | 1884 | 2477 | 2    | 1865 | 2849 | 3442 |
| cb1279_c42/f1p0/3192    | gnl BL_ORD_ID 61184   cb1279_c48/f1p0/3561<br>isoform=cb1279_c42;full_length_coverage=1;non_full_length_coverage=0;isoform_length=3192;expected_accuracy=0.999                          | 1    | 2738 | 2735 | 3192 | 14   | 2751 | 3111 | 3561 |

|                                                                                                                      |                     |                          |      |      |      |      |     |      |      |     |   |
|----------------------------------------------------------------------------------------------------------------------|---------------------|--------------------------|------|------|------|------|-----|------|------|-----|---|
| length_coverage=0;isoform_length=3192;expected_accuracy=0.993                                                        |                     |                          |      |      |      |      |     |      |      |     |   |
| cb8564_c41162/f1p0/3158                                                                                              | gnl BL_ORD_ID 55600 | cb8564_c46484/f1p0/3151  | 107  | 2553 | 2548 | 3042 | 5   | 247  | 2606 | 309 | 9 |
| cb7315_c15/f1p0/1788                                                                                                 |                     |                          |      |      |      |      |     |      |      |     |   |
| isoform=cb7315_c15;full_length_coverage=1;non_full_length_coverage=0;isoform_length=1788;expected_accuracy=0.992     | gnl BL_ORD_ID 50474 | cb7315_c7/f1p0/2338      | 1    | 1670 | 1667 | 1772 | 42  | 171  | 2200 | 230 | 5 |
| cb8564_c17122/f1p0/3317                                                                                              | gnl BL_ORD_ID 12196 | cb8564_c12654/f2p0/4122  |      |      |      |      |     |      |      |     |   |
| isoform=cb8564_c12654;full_length_coverage=2;non_full_length_coverage=0;isoform_length=4122;expected_accuracy=1.000  | 12                  |                          | 1905 | 1905 | 3230 | 9    | 190 | 2784 | 410  | 9   | 1 |
| cb6339_c16/f1p1/2286                                                                                                 | gnl BL_ORD_ID 5632  | cb6339_c91/f6p2/2480     |      |      |      |      |     |      |      |     |   |
| isoform=cb6339_c16;full_length_coverage=1;non_full_length_coverage=1;isoform_length=2286;expected_accuracy=0.997     | 1                   |                          | 1780 | 1776 | 2180 | 93   | 187 | 2077 | 248  | 0   | 3 |
| cb8564_c47011/f1p0/3100                                                                                              | gnl BL_ORD_ID 16886 | cb8564_c50727/f1p0/3201  |      |      |      |      |     |      |      |     |   |
| isoform=cb8564_c50727;full_length_coverage=1;non_full_length_coverage=0;isoform_length=3201;expected_accuracy=0.999  | 2                   |                          | 2306 | 2301 | 2934 | 2    | 232 | 2561 | 319  | 4   | 3 |
| cb8564_c118659/f2p0/3437                                                                                             | gnl BL_ORD_ID 54608 | cb8564_c127899/f1p0/3880 |      |      |      |      |     |      |      |     |   |
| isoform=cb8564_c118659;full_length_coverage=2;non_full_length_coverage=0;isoform_length=3437;expected_accuracy=0.994 | 1                   |                          | 2754 | 2752 | 3269 | 297  | 307 | 3305 | 382  | 3   | 5 |
| cb2737_c39/f1p0/2866                                                                                                 | gnl BL_ORD_ID 36735 | cb2737_c13/f1p0/3105     |      |      |      |      |     |      |      |     |   |
| isoform=cb2737_c13;full_length_coverage=1;non_full_l                                                                 | 1                   |                          | 1679 | 1677 | 2849 | 1    | 167 | 1808 | 297  | 9   | 6 |

|                         |                                                                                                                                                                                                                                                                                                                                                         |      |      |      |      |      |          |      |          |
|-------------------------|---------------------------------------------------------------------------------------------------------------------------------------------------------------------------------------------------------------------------------------------------------------------------------------------------------------------------------------------------------|------|------|------|------|------|----------|------|----------|
| cb8564_c15230/flp0/1944 | <p>ength_coverage=0;isoform_length=3105;expected_accuracy=0.995</p> <p>gnl BL_ORD_ID 16528      cb8564_c54660/flp21/2689</p> <p>isoform=cb8564_c54660;full_length_coverage=1;non_full_length_coverage=21;isoform_length=2689;expected_accuracy=0.999</p>                                                                                                | 352  | 1944 | 38   | 357  | 1087 | 267<br>9 | 50   | 377      |
| cb502_c51/flp1/2358     | <p>gnl BL_ORD_ID 43896      cb502_c9/f2p3/2544</p> <p>isoform=cb502_c9;full_length_coverage=2;non_full_length_coverage=3;isoform_length=2544;expected_accuracy=0.999</p>                                                                                                                                                                                | 1053 | 2278 | 1    | 1055 | 1164 | 238<br>7 | 7    | 106<br>1 |
| cb454_c8/flp0/2277      | <p>isoform=cb454_c8;full_length_coverage=1;non_full_length_coverage=0;isoform_length=2277;expected_accuracy=1.000</p> <p>gnl BL_ORD_ID 72201      cb454_c19/flp0/2558</p>                                                                                                                                                                               | 277  | 2277 | 94   | 276  | 406  | 240<br>6 | 118  | 300      |
| cb2784_c26/flp0/1619    | <p>isoform=cb2784_c26;full_length_coverage=1;non_full_length_coverage=0;isoform_length=1619;expected_accuracy=1.000</p> <p>gnl BL_ORD_ID 68844      cb2784_c9/flp0/3117</p>                                                                                                                                                                             | 595  | 1619 | 64   | 597  | 1781 | 280<br>5 | 5    | 538      |
| cb3818_c9/flp0/2837     | <p>gnl BL_ORD_ID 71534      cb3818_c3/flp0/3470</p>                                                                                                                                                                                                                                                                                                     | 1    | 1932 | 1932 | 2758 | 49   | 198<br>1 | 2626 | 345<br>2 |
| cb6981_c20/flp0/1700    | <p>gnl BL_ORD_ID 5610      cb6981_c22/f2p0/2125</p> <p>isoform=cb6981_c20;full_length_coverage=1;non_full_length_coverage=0;isoform_length=1700;expected_accuracy=0.999</p> <p>gnl BL_ORD_ID 70865      cb396_c49/flp0/3077</p> <p>isoform=cb6981_c22;full_length_coverage=2;non_full_length_coverage=0;isoform_length=2125;expected_accuracy=0.997</p> | 270  | 1700 | 8    | 274  | 531  | 196<br>6 | 1    | 265      |
| cb396_c19/flp0/2179     | <p>isoform=cb396_c19;full_length_coverage=1;non_full_length_coverage=0;isoform_length=2179;expected_accuracy=1.000</p>                                                                                                                                                                                                                                  | 312  | 2179 | 53   | 312  | 523  | 239<br>4 | 21   | 282      |

|                                                                                                                                          |                                                                                                                                            |                         |     |      |      |      |      |      |      |      |
|------------------------------------------------------------------------------------------------------------------------------------------|--------------------------------------------------------------------------------------------------------------------------------------------|-------------------------|-----|------|------|------|------|------|------|------|
| ngth_coverage=0;isoform_length=2179;expected_accuracy=0.992                                                                              |                                                                                                                                            |                         |     |      |      |      |      |      |      |      |
| cb1445_c4/f1p0/4026                                                                                                                      | gnl BL_ORD_ID 29673<br>isoform=cb1445_c1;full_length_coverage=1;non_full_length_coverage=0;isoform_length=4325;expected_accuracy=0.996     | cb1445_c1/f1p0/4325     | 1   | 2730 | 2729 | 3592 | 31   | 2756 | 3461 | 4325 |
| cb18456_c2267/f1p0/1551                                                                                                                  | gnl BL_ORD_ID 74175<br>isoform=cb18456_c2267;full_length_coverage=1;non_full_length_coverage=0;isoform_length=1551;expected_accuracy=0.996 | cb5625_c0/f1p0/3054     | 178 | 1563 | 29   | 179  | 1490 | 2853 | 2    | 152  |
| cb8564_c45699/f1p0/3005                                                                                                                  | gnl BL_ORD_ID 18852<br>isoform=cb8564_c45699;full_length_coverage=1;non_full_length_coverage=0;isoform_length=3005;expected_accuracy=0.996 | cb8564_c84488/f1p0/3408 | 233 | 2844 | 1    | 233  | 790  | 3408 | 1    | 217  |
| cb8564_c40598/f1p4/3119                                                                                                                  | gnl BL_ORD_ID 55551<br>isoform=cb8564_c40598;full_length_coverage=1;non_full_length_coverage=0;isoform_length=3119;expected_accuracy=0.996 | cb8564_c44964/f1p0/3508 | 1   | 2732 | 2729 | 3053 | 1    | 2727 | 2848 | 3173 |
| cb5930_c6/f1p0/2076                                                                                                                      | gnl BL_ORD_ID 45031<br>isoform=cb5930_c6;full_length_coverage=1;non_full_length_coverage=0;isoform_length=2076;expected_accuracy=1.000     | cb5930_c3/f1p0/2974     | 159 | 2013 | 1    | 160  | 1120 | 2974 | 5    | 164  |
| cb5608_c38/f1p0/2614<br>isoform=cb5608_c38;full_length_coverage=1;non_full_length_coverage=0;isoform_length=2614;expected_accuracy=0.992 | gnl BL_ORD_ID 46459<br>isoform=cb5608_c38;full_length_coverage=1;non_full_length_coverage=0;isoform_length=2614;expected_accuracy=0.992    | cb5608_c24/f1p1/2825    | 786 | 2614 | 80   | 785  | 864  | 2702 | 52   | 755  |
| cb8564_c37361/f1p0/3076                                                                                                                  | gnl BL_ORD_ID 16886<br>isoform=cb8564_c37361;full_length_coverage=1;non_full_length_coverage=0;isoform_length=3076;expected_accuracy=0.999 | cb8564_c50727/f1p0/3201 | 1   | 2481 | 2477 | 3070 | 3    | 2507 | 2608 | 3201 |

|                                                                                                                                                  |                                                                                                                                                                      |     |      |      |      |      |          |      |          |
|--------------------------------------------------------------------------------------------------------------------------------------------------|----------------------------------------------------------------------------------------------------------------------------------------------------------------------|-----|------|------|------|------|----------|------|----------|
| cb8564_c72974/f1p0/4031<br>isoform=cb8564_c72974;full_length_coverage=1;non_full_length_coverage=0;isoform_length=4031;expected_accuracy=0.996   | gnl BL_ORD_ID 56749 cb8564_c69992/f1p0/4505                                                                                                                          | 409 | 3972 | 6    | 410  | 971  | 454<br>2 | 132  | 527      |
| cb16366_c0/f1p0/1316                                                                                                                             | gnl BL_ORD_ID 43221 cb5153_c7/f1p0/3152<br>isoform=cb5153_c7;full_length_coverage=1;non_full_length_coverage=0;isoform_length=3152;expected_accuracy=0.993           | 298 | 1233 | 38   | 298  | 2210 | 314<br>8 | 23   | 283      |
| cb18456_c4991/f1p0/1426                                                                                                                          | gnl BL_ORD_ID 67493 cb18456_c4264/f1p1/1767                                                                                                                          | 252 | 1214 | 32   | 257  | 803  | 176<br>5 | 22   | 247      |
| cb2021_c6/f1p1/3759                                                                                                                              | gnl BL_ORD_ID 34677 cb2021_c4/f1p2/4085<br>isoform=cb2021_c4;full_length_coverage=1;non_full_length_coverage=2;isoform_length=4085;expected_accuracy=0.996           | 244 | 3575 | 1    | 249  | 770  | 408<br>4 | 34   | 277      |
| cb8564_c182028/f1p0/2513<br>isoform=cb8564_c182028;full_length_coverage=1;non_full_length_coverage=0;isoform_length=2513;expected_accuracy=0.996 | gnl BL_ORD_ID 12770 cb8564_c160685/f1p8/2891<br>isoform=cb8564_c160685;full_length_coverage=1;non_full_length_coverage=8;isoform_length=2891;expected_accuracy=0.993 | 1   | 1971 | 1968 | 2513 | 1    | 197<br>3 | 2117 | 266<br>2 |
| cb5197_c7/f1p0/2919                                                                                                                              | gnl BL_ORD_ID 44661 cb5197_c4/f1p0/3085<br>isoform=cb5197_c4;full_length_coverage=1;non_full_length_coverage=0;isoform_length=3085;expected_accuracy=0.995           | 1   | 1528 | 1527 | 2910 | 7    | 153<br>0 | 1678 | 305<br>8 |
| cb8564_c36056/f1p0/2652<br>isoform=cb8564_c36056;full_length_coverage=1;non_full_length_coverage=0;isoform_length=2652;expected_accuracy=0.999   | gnl BL_ORD_ID 55230 cb8564_c35854/f2p1/3003                                                                                                                          | 248 | 2639 | 1    | 251  | 480  | 287<br>0 | 88   | 336      |

|                                                                                                                                                  |                                                                                                                                                                           |     |      |      |      |     |      |      |      |
|--------------------------------------------------------------------------------------------------------------------------------------------------|---------------------------------------------------------------------------------------------------------------------------------------------------------------------------|-----|------|------|------|-----|------|------|------|
| cb8564_c39136/f1p0/3036<br>isoform=cb8564_c39136;full_length_coverage=1;non_full_length_coverage=0;isoform_length=3036;expected_accuracy=0.998   | gnl BL_ORD_ID 13575      cb8564_c20499/f3p0/3328<br>isoform=cb8564_c20499;full_length_coverage=3;non_full_length_coverage=0;isoform_length=3328;expected_accuracy=1.000   | 1   | 2089 | 2085 | 3036 | 1   | 2096 | 2223 | 3176 |
| cb8564_c81778/f1p0/3178                                                                                                                          | gnl BL_ORD_ID 11292      cb8564_c153063/f2p1/3553<br>isoform=cb8564_c153063;full_length_coverage=2;non_full_length_coverage=1;isoform_length=3553;expected_accuracy=0.998 | 2   | 2698 | 2694 | 2918 | 8   | 2700 | 3302 | 3526 |
| cb8564_c135684/f4p2/3618<br>isoform=cb8564_c135684;full_length_coverage=4;non_full_length_coverage=2;isoform_length=3618;expected_accuracy=0.996 | gnl BL_ORD_ID 58077      cb8564_c88175/f1p0/4011                                                                                                                          | 2   | 2741 | 2741 | 3509 | 1   | 2742 | 3254 | 4022 |
| cb8564_c46939/f1p1/2926                                                                                                                          | gnl BL_ORD_ID 15169      cb8564_c40218/f1p0/3146<br>isoform=cb8564_c40218;full_length_coverage=1;non_full_length_coverage=0;isoform_length=3146;expected_accuracy=0.993   | 1   | 2134 | 2130 | 2870 | 4   | 2130 | 2235 | 2968 |
| cb8564_c38233/f1p0/2780                                                                                                                          | gnl BL_ORD_ID 11414      cb8564_c147327/f4p0/3198<br>isoform=cb8564_c147327;full_length_coverage=4;non_full_length_coverage=0;isoform_length=3198;expected_accuracy=0.999 | 1   | 1857 | 1856 | 2785 | 289 | 2145 | 2270 | 3198 |
| cb8564_c185920/f1p0/2777<br>isoform=cb8564_c185920;full_length_coverage=1;non_full_length_coverage=0;isoform_length=2777;expected_accuracy=0.996 | gnl BL_ORD_ID 13138      cb8564_c180315/f1p0/2916<br>isoform=cb8564_c180315;full_length_coverage=1;non_full_length_coverage=0;isoform_length=2916;expected_accuracy=0.997 | 174 | 2777 | 1    | 177  | 313 | 2916 | 17   | 194  |
| cb8564_c16220/f12p0/3116<br>isoform=cb8564_c16220;full_length_coverage=12;non_                                                                   | gnl BL_ORD_ID 14723      cb8564_c38100/f3p0/3175<br>isoform=cb8564_c38100;full_length_coverage=3;non_fu                                                                   | 13  | 1764 | 1762 | 3034 | 1   | 1751 | 1903 | 3175 |

|                                                                                                                                                                                                                |                                                                                                                                                                                                                                                    |      |      |      |      |      |      |      |      |
|----------------------------------------------------------------------------------------------------------------------------------------------------------------------------------------------------------------|----------------------------------------------------------------------------------------------------------------------------------------------------------------------------------------------------------------------------------------------------|------|------|------|------|------|------|------|------|
| full_length_coverage=0;isoform_length=3116;expected_accuracy=0.996<br>cb7865_c10/f1p0/2730<br>isoform=cb7865_c10;full_length_coverage=1;non_full_length_coverage=0;isoform_length=2730;expected_accuracy=0.996 | ll_length_coverage=0;isoform_length=3175;expected_accuracy=0.997<br>gnl BL_ORD_ID 8963                      cb7865_c7/f1p0/3320<br>isoform=cb7865_c7;full_length_coverage=1;non_full_length_coverage=0;isoform_length=3320;expected_accuracy=0.996 | 1127 | 2730 | 1    | 1129 | 1716 | 3320 | 240  | 1368 |
| cb1494_c8/f1p0/4224<br>isoform=cb1494_c8;full_length_coverage=1;non_full_length_coverage=0;isoform_length=4224;expected_accuracy=0.996                                                                         | gnl BL_ORD_ID 66209   cb18199_c3/f1p0/5929<br>isoform=cb18199_c3;full_length_coverage=1;non_full_length_coverage=0;isoform_length=5929;expected_accuracy=0.996                                                                                     | 1    | 2993 | 2993 | 4189 | 1    | 2993 | 4740 | 5935 |
| cb3180_c2/f1p0/3347<br>isoform=cb3180_c2;full_length_coverage=1;non_full_length_coverage=0;isoform_length=3347;expected_accuracy=0.997                                                                         | gnl BL_ORD_ID 38070                      cb3180_c0/f1p0/3698<br>isoform=cb3180_c0;full_length_coverage=1;non_full_length_coverage=0;isoform_length=3698;expected_accuracy=0.996                                                                    | 13   | 2456 | 2452 | 3288 | 1    | 2441 | 2862 | 3698 |
| cb5999_c8/f1p0/2429<br>isoform=cb5999_c8;full_length_coverage=1;non_full_length_coverage=0;isoform_length=2429;expected_accuracy=0.996                                                                         | gnl BL_ORD_ID 45208                      cb5999_c3/f1p0/2890<br>isoform=cb5999_c3;full_length_coverage=1;non_full_length_coverage=0;isoform_length=2890;expected_accuracy=0.995                                                                    | 1203 | 2417 | 1    | 1207 | 1670 | 2890 | 27   | 1233 |
| cb9446_c7/f1p0/1576<br>isoform=cb9446_c7;full_length_coverage=1;non_full_length_coverage=0;isoform_length=1576;expected_accuracy=0.994                                                                         | gnl BL_ORD_ID 59725   cb9446_c0/f4p1/1997<br>isoform=cb9446_c0;full_length_coverage=1;non_full_length_coverage=0;isoform_length=1997;expected_accuracy=0.994                                                                                       | 189  | 1576 | 21   | 194  | 357  | 1744 | 4    | 176  |
| cb8564_c14743/f1p0/2123<br>isoform=cb8564_c14743;full_length_coverage=1;non_full_length_coverage=0;isoform_length=2123;expected_accuracy=1.000                                                                 | gnl BL_ORD_ID 12195                      cb8564_c12302/f1p1/2294<br>isoform=cb8564_c12302;full_length_coverage=1;non_full_length_coverage=1;isoform_length=2294;expected_accuracy=0.992                                                            | 1    | 1712 | 1710 | 2105 | 47   | 1758 | 1901 | 2294 |
| cb8564_c39756/f1p1/3004<br>isoform=cb8564_c39756;full_length_coverage=1;non_full_length_coverage=0;isoform_length=3004;expected_accuracy=0.996                                                                 | gnl BL_ORD_ID 18852                      cb8564_c84488/f1p0/3408<br>isoform=cb8564_c84488;full_length_coverage=1;non_full_length_coverage=0;isoform_length=3408;expected_accuracy=0.996                                                            | 219  | 2847 | 1    | 219  | 790  | 3406 | 1    | 217  |

|                         |                                                                                                                                                                                                                                                     |     |      |      |      |     |      |      |      |
|-------------------------|-----------------------------------------------------------------------------------------------------------------------------------------------------------------------------------------------------------------------------------------------------|-----|------|------|------|-----|------|------|------|
| cb4260_c5/f1p1/2120     | ll_length_coverage=0;isoform_length=3408;expected_accuracy=0.996<br>gnl BL_ORD_ID 42573                      cb4260_c1/f1p0/3391<br>isoform=cb4260_c1;full_length_coverage=1;non_full_length_coverage=0;isoform_length=3391;expected_accuracy=0.994 | 1   | 1332 | 1329 | 2119 | 25  | 1356 | 2569 | 3357 |
| cb8564_c83310/f1p0/2140 | gnl BL_ORD_ID 13944                      cb8564_c4652/f3p0/3053<br>isoform=cb8564_c83310;full_length_coverage=1;non_full_length_coverage=0;isoform_length=2140;expected_accuracy=0.993                                                              | 1   | 1969 | 1968 | 2140 | 27  | 1996 | 2363 | 2535 |
| cb8564_c45116/f1p0/2875 | gnl BL_ORD_ID 56118                      cb8564_c70073/f1p0/3142<br>isoform=cb8564_c45116;full_length_coverage=1;non_full_length_coverage=0;isoform_length=2875;expected_accuracy=1.000                                                             | 1   | 1544 | 1541 | 2875 | 67  | 1610 | 1744 | 3078 |
| cb405_c8/f1p0/1921      | gnl BL_ORD_ID 41390                      cb405_c4/f1p0/2728<br>isoform=cb405_c4;full_length_coverage=1;non_full_length_coverage=0;isoform_length=2728;expected_accuracy=0.998                                                                       | 1   | 1211 | 1210 | 1765 | 45  | 1255 | 2161 | 2718 |
| cb9852_c11/f1p0/1916    | gnl BL_ORD_ID 19373                      cb9852_c8/f1p0/2057<br>isoform=cb9852_c8;full_length_coverage=1;non_full_length_coverage=0;isoform_length=2057;expected_accuracy=0.993                                                                     | 575 | 1848 | 9    | 580  | 691 | 1965 | 1    | 570  |
| cb8564_c19831/f2p0/3515 | gnl BL_ORD_ID 11871                      cb8564_c14157/f1p1/4319<br>isoform=cb8564_c19831;full_length_coverage=2;non_full_length_coverage=0;isoform_length=3515;expected_accuracy=0.994                                                             | 1   | 2517 | 2515 | 3515 | 1   | 2504 | 3317 | 4319 |



|                         |                                                                                                                                                                          |     |      |      |      |     |      |      |      |
|-------------------------|--------------------------------------------------------------------------------------------------------------------------------------------------------------------------|-----|------|------|------|-----|------|------|------|
| cb3087_c39/f1p0/3065    | gnl BL_ORD_ID 38387      cb3087_c5/f3p1/2943<br>isoform=cb3087_c5;full_length_coverage=3;non_full_length_coverage=1;isoform_length=2943;expected_accuracy=1.000          | 20  | 2059 | 2054 | 2496 | 1   | 2040 | 2449 | 2891 |
| cb2737_c55/f1p1/2936    | gnl BL_ORD_ID 38132      cb2737_c20/f1p0/3644<br>isoform=cb2737_c55;full_length_coverage=1;non_full_length_coverage=1;isoform_length=2936;expected_accuracy=1.000        | 1   | 1595 | 1593 | 2848 | 687 | 2278 | 2410 | 3644 |
| cb8564_c44698/f1p5/2843 | gnl BL_ORD_ID 56961      cb8564_c78609/f1p0/3194<br>isoform=cb8564_c44698;full_length_coverage=1;non_full_length_coverage=5;isoform_length=2843;expected_accuracy=0.997  | 18  | 2516 | 2511 | 2834 | 45  | 2539 | 2660 | 2985 |
| cb8564_c45596/f1p1/3430 | gnl BL_ORD_ID 53657      cb8564_c149859/f1p1/3614<br>isoform=cb8564_c45596;full_length_coverage=1;non_full_length_coverage=1;isoform_length=3430;expected_accuracy=0.995 | 2   | 2780 | 2775 | 3379 | 78  | 2856 | 2975 | 3579 |
| cb8564_c37079/f1p0/2659 | gnl BL_ORD_ID 54752      cb8564_c167108/f1p0/2919<br>isoform=cb8564_c37079;full_length_coverage=1;non_full_length_coverage=1;isoform_length=2659;expected_accuracy=0.995 | 1   | 1322 | 1321 | 2423 | 105 | 1425 | 1810 | 2912 |
| cb8564_c36978/f1p0/2472 | gnl BL_ORD_ID 14359      cb8564_c25630/f2p0/2567<br>isoform=cb8564_c36978;full_length_coverage=1;non_full_length_coverage=0;isoform_length=2472;expected_accuracy=1.000  | 1   | 1385 | 1381 | 2274 | 5   | 1388 | 1560 | 2454 |
| cb8564_c82155/f1p2/3145 | gnl BL_ORD_ID 16789      cb8564_c69307/f2p2/3301<br>isoform=cb8564_c82155;full_length_coverage=1;non_full_length_coverage=2;isoform_length=3145;expected_accuracy=0.995  | 255 | 3139 | 1    | 254  | 413 | 3301 | 25   | 279  |
| cb8564_c12805/f1p0/2580 | gnl BL_ORD_ID 56712      cb8564_c53711/f1p0/3201<br>isoform=cb8564_c12805;full_length_coverage=1;non_full_length_coverage=1;isoform_length=2580;expected_accuracy=0.995  | 1   | 1695 | 1690 | 2580 | 32  | 1727 | 1969 | 2862 |

|                                                                                                                                                                                                                                                                                          |                                                                                                                                                                      |     |      |      |      |      |          |      |          |
|------------------------------------------------------------------------------------------------------------------------------------------------------------------------------------------------------------------------------------------------------------------------------------------|----------------------------------------------------------------------------------------------------------------------------------------------------------------------|-----|------|------|------|------|----------|------|----------|
| ull_length_coverage=0;isoform_length=2580;expected_accuracy=0.993<br>cb500_c17/f1p0/2323<br>isoform=cb500_c17;full_length_coverage=1;non_full_length_coverage=0;isoform_length=2323;expected_accuracy=0.997                                                                              | gnl BL_ORD_ID 72243 cb500_c40/f1p0/3270                                                                                                                              | 1   | 1293 | 1288 | 2323 | 763  | 205<br>4 | 2186 | 322<br>1 |
| cb416_c19/f1p0/2939<br>isoform=cb416_c26;full_length_coverage=1;non_full_length_coverage=0;isoform_length=3038;expected_accuracy=1.000                                                                                                                                                   | gnl BL_ORD_ID 42634 cb416_c26/f1p0/3038                                                                                                                              | 105 | 2931 | 10   | 109  | 203  | 302<br>9 | 4    | 103      |
| cb8564_c45300/f1p4/3014<br>isoform=cb8564_c45300;full_length_coverage=1;non_full_length_coverage=4;isoform_length=3014;expected_accuracy=0.996<br>cb3022_c6/f1p0/3495<br>isoform=cb3022_c6;full_length_coverage=1;non_full_length_coverage=0;isoform_length=3495;expected_accuracy=0.998 | gnl BL_ORD_ID 57017 cb8564_c80370/f1p0/3493                                                                                                                          | 243 | 3014 | 122  | 246  | 2805 | 31       | 3085 | 296<br>2 |
| cb3022_c6/f1p0/3495<br>isoform=cb3022_c6;full_length_coverage=1;non_full_length_coverage=0;isoform_length=3495;expected_accuracy=0.998                                                                                                                                                   | gnl BL_ORD_ID 69057 cb3022_c5/f1p0/3748                                                                                                                              | 1   | 2677 | 2673 | 3381 | 66   | 274<br>3 | 3049 | 375<br>7 |
| cb6471_c23/f1p0/2688<br>isoform=cb6471_c20;full_length_coverage=1;non_full_length_coverage=0;isoform_length=3013;expected_accuracy=0.992                                                                                                                                                 | gnl BL_ORD_ID 4198 cb6471_c20/f1p0/3013                                                                                                                              | 1   | 1927 | 1928 | 2662 | 197  | 2114     | 2275 | 301<br>2 |
| cb17651_c0/f1p0/1850<br>isoform=cb17651_c0;full_length_coverage=1;non_full_length_coverage=0;isoform_length=1850;expected_accuracy=1.000                                                                                                                                                 | gnl BL_ORD_ID 10159 cb8564_c111800/f1p0/2023<br>isoform=cb8564_c111800;full_length_coverage=1;non_full_length_coverage=0;isoform_length=2023;expected_accuracy=0.996 | 1   | 1017 | 1017 | 1846 | 62   | 107<br>4 | 1194 | 202<br>3 |

|                                                                                                                                                |                                                                                                                                                                         |     |      |      |      |      |      |      |      |
|------------------------------------------------------------------------------------------------------------------------------------------------|-------------------------------------------------------------------------------------------------------------------------------------------------------------------------|-----|------|------|------|------|------|------|------|
| cb8564_c4894/f1p1/2708                                                                                                                         | gnl BL_ORD_ID 15477      cb8564_c4890/f2p1/2906<br>isoform=cb8564_c4890;full_length_coverage=2;non_full_length_coverage=1;isoform_length=2906;expected_accuracy=1.000   | 1   | 2353 | 2352 | 2680 | 92   | 2445 | 2578 | 2906 |
| cb8288_c9/f1p0/1125                                                                                                                            | gnl BL_ORD_ID 9858      cb8288_c4/f1p0/2081<br>isoform=cb8288_c4;full_length_coverage=1;non_full_length_coverage=0;isoform_length=2081;expected_accuracy=0.997          | 165 | 1015 | 2    | 166  | 1206 | 2056 | 3    | 168  |
| cb2068_c7/f1p1/2788<br>isoform=cb2068_c7;full_length_coverage=1;non_full_length_coverage=1;isoform_length=2788;expected_accuracy=0.994         | gnl BL_ORD_ID 68270      cb2068_c8/f1p0/3866                                                                                                                            | 1   | 1500 | 1501 | 2782 | 53   | 1566 | 2530 | 3813 |
| cb8564_c46104/f1p0/3297                                                                                                                        | gnl BL_ORD_ID 16877      cb8564_c54048/f1p0/3516<br>isoform=cb8564_c54048;full_length_coverage=1;non_full_length_coverage=0;isoform_length=3516;expected_accuracy=0.997 | 1   | 2256 | 2256 | 3216 | 6    | 2283 | 2540 | 3516 |
| cb8564_c25429/f1p0/2554                                                                                                                        | gnl BL_ORD_ID 55231      cb8564_c36011/f1p0/3015                                                                                                                        | 732 | 2465 | 9    | 737  | 899  | 2637 | 10   | 751  |
| cb8564_c87256/f1p0/2285<br>isoform=cb8564_c87256;full_length_coverage=1;non_full_length_coverage=0;isoform_length=2285;expected_accuracy=0.992 | gnl BL_ORD_ID 16210      cb8564_c74150/f1p4/3524<br>isoform=cb8564_c74150;full_length_coverage=1;non_full_length_coverage=4;isoform_length=3524;expected_accuracy=0.998 | 1   | 1703 | 1700 | 2285 | 2459 | 754  | 620  | 28   |
| cb8564_c1638/f1p0/2866                                                                                                                         | gnl BL_ORD_ID 12808      cb8564_c1599/f1p0/3294<br>isoform=cb8564_c1599;full_length_coverage=1;non_full_length_coverage=0;isoform_length=3294;expected_accuracy=0.999   | 285 | 2855 | 90   | 288  | 547  | 3116 | 2    | 196  |

|                                                                                                                                                |                                                                                                                                                              |     |      |      |      |      |      |      |      |
|------------------------------------------------------------------------------------------------------------------------------------------------|--------------------------------------------------------------------------------------------------------------------------------------------------------------|-----|------|------|------|------|------|------|------|
| cb1574_c3/f1p1/3697                                                                                                                            | gnl BL_ORD_ID 63749 cb1574_c1/f1p1/4246                                                                                                                      | 1   | 2382 | 2380 | 3498 | 5    | 2386 | 2965 | 4082 |
| cb12714_c29/f1p2/1583                                                                                                                          | gnl BL_ORD_ID 55935 cb8564_c49443/f1p0/2984                                                                                                                  | 1   | 1296 | 1293 | 1581 | 35   | 1330 | 2394 | 2681 |
| cb69_c29/f1p0/5122                                                                                                                             | gnl BL_ORD_ID 5904 cb69_c5/f1p0/4977<br>isoform=cb69_c5;full_length_coverage=1;non_full_length_coverage=0;isoform_length=4977;expected_accuracy=0.999        | 1   | 2349 | 2346 | 4610 | 101  | 2450 | 2630 | 4893 |
| cb6221_c5/f3p1/2261<br>isoform=cb6221_c5;full_length_coverage=3;non_full_length_coverage=1;isoform_length=2261;expected_accuracy=0.999         | gnl BL_ORD_ID 4878 cb6221_c8/f1p3/4003<br>isoform=cb6221_c8;full_length_coverage=1;non_full_length_coverage=3;isoform_length=4003;expected_accuracy=0.995    | 256 | 2256 | 85   | 256  | 885  | 2887 | 1    | 174  |
| cb12714_c29/f1p2/1583                                                                                                                          | gnl BL_ORD_ID 52715 cb8564_c11997/f1p2/2670                                                                                                                  | 1   | 1296 | 1293 | 1559 | 1    | 1296 | 2363 | 2629 |
| cb3763_c17/f1p0/2834<br>isoform=cb3763_c17;full_length_coverage=1;non_full_length_coverage=0;isoform_length=2834;expected_accuracy=0.995       | gnl BL_ORD_ID 71497 cb3763_c45/f1p0/3130                                                                                                                     | 1   | 1844 | 1844 | 2831 | 3    | 1852 | 2017 | 3004 |
| cb2014_c39/f1p0/2720                                                                                                                           | gnl BL_ORD_ID 35262 cb2014_c18/f1p0/3961<br>isoform=cb2014_c18;full_length_coverage=1;non_full_length_coverage=0;isoform_length=3961;expected_accuracy=0.991 | 525 | 2629 | 56   | 527  | 1866 | 3961 | 198  | 666  |
| cb8564_c44063/f1p0/2503<br>isoform=cb8564_c44063;full_length_coverage=1;non_full_length_coverage=0;isoform_length=2503;expected_accuracy=0.999 | gnl BL_ORD_ID 54119 cb8564_c18913/f1p5/2705                                                                                                                  | 397 | 2452 | 49   | 402  | 649  | 2704 | 150  | 504  |

|                         |                                                                                                                                                                         |      |      |      |      |      |      |      |      |
|-------------------------|-------------------------------------------------------------------------------------------------------------------------------------------------------------------------|------|------|------|------|------|------|------|------|
| cb3115_c3/f1p0/3418     | gnl BL_ORD_ID 39034      cb3115_c1/f1p0/3824<br>isoform=cb3115_c1;full_length_coverage=1;non_full_length_coverage=0;isoform_length=3824;expected_accuracy=0.996         | 1706 | 3371 | 1    | 1709 | 2159 | 3824 | 150  | 1853 |
| cb8564_c22195/f4p0/2939 | gnl BL_ORD_ID 18906      cb8564_c90449/f1p3/3223<br>isoform=cb8564_c22195;full_length_coverage=4;non_full_length_coverage=0;isoform_length=2939;expected_accuracy=0.996 | 264  | 2914 | 1    | 264  | 573  | 3223 | 33   | 295  |
| cb8564_c36689/f1p1/2368 | gnl BL_ORD_ID 16879      cb8564_c48606/f1p1/3308<br>isoform=cb8564_c36689;full_length_coverage=1;non_full_length_coverage=1;isoform_length=2368;expected_accuracy=0.991 | 1    | 1709 | 1706 | 2368 | 1    | 1701 | 2640 | 3304 |
| cb8564_c54251/f1p0/2624 | gnl BL_ORD_ID 56693      cb8564_c52693/f2p0/3348                                                                                                                        | 2    | 2034 | 2033 | 2630 | 3    | 2035 | 2676 | 3273 |
| cb8564_c35645/f1p0/2804 | gnl BL_ORD_ID 57123      cb8564_c84015/f1p0/3207                                                                                                                        | 150  | 2722 | 1    | 151  | 266  | 2838 | 3    | 153  |
| cb7064_c3/f2p0/1272     | gnl BL_ORD_ID 3805      cb7064_c24/f6p0/3053<br>isoform=cb7064_c3;full_length_coverage=2;non_full_length_coverage=0;isoform_length=1272;expected_accuracy=0.993         | 129  | 1272 | 25   | 129  | 1899 | 3052 | 72   | 177  |
| cb2206_c4/f1p1/2033     | gnl BL_ORD_ID 68325      cb2206_c5/f1p0/3375<br>isoform=cb2206_c4;full_length_coverage=1;non_full_length_coverage=1;isoform_length=2033;expected_accuracy=0.994         | 273  | 2033 | 3    | 275  | 1600 | 3361 | 1    | 274  |
| cb792_c8/f3p0/3700      | gnl BL_ORD_ID 49470      cb792_c35/f1p1/3973<br>isoform=cb792_c8;full_length_coverage=3;non_full_length_coverage=0;isoform_length=3700;expected_accuracy=0.996          | 186  | 3699 | 1    | 187  | 384  | 3897 | 75   | 266  |

|                                                                                                                                                                                                              |                                                                                                                                                                      |      |      |      |      |      |     |      |     |
|--------------------------------------------------------------------------------------------------------------------------------------------------------------------------------------------------------------|----------------------------------------------------------------------------------------------------------------------------------------------------------------------|------|------|------|------|------|-----|------|-----|
| gth_coverage=0;isoform_length=3700;expected_accuracy=1.000<br>cb8564_c16240/f1p3/2671<br>isoform=cb8564_c16240;full_length_coverage=1;non_full_length_coverage=3;isoform_length=2671;expected_accuracy=0.997 | gnl BL_ORD_ID 54138 cb8564_c19172/f1p1/3470                                                                                                                          | 1    | 2075 | 2072 | 2623 | 46   | 212 | 2658 | 320 |
| cb11999_c13/f1p1/1500<br>isoform=cb11999_c13;full_length_coverage=1;non_full_length_coverage=1;isoform_length=1500;expected_accuracy=0.993                                                                   | gnl BL_ORD_ID 14692 cb8564_c45214/f1p5/1849<br>isoform=cb8564_c45214;full_length_coverage=1;non_full_length_coverage=5;isoform_length=1849;expected_accuracy=0.992   | 278  | 1500 | 3    | 280  | 532  | 176 | 27   | 306 |
| cb8564_c46500/f1p1/2752                                                                                                                                                                                      | gnl BL_ORD_ID 9350 cb8564_c11826/f1p0/2916<br>isoform=cb8564_c11826;full_length_coverage=1;non_full_length_coverage=0;isoform_length=2916;expected_accuracy=0.997    | 1292 | 2661 | 1    | 1293 | 1543 | 291 | 3    | 129 |
| cb8564_c4558/f1p0/2790<br>isoform=cb8564_c4558;full_length_coverage=1;non_full_length_coverage=0;isoform_length=2790;expected_accuracy=0.993                                                                 | gnl BL_ORD_ID 14126 cb8564_c4556/f1p0/3011<br>isoform=cb8564_c4556;full_length_coverage=1;non_full_length_coverage=0;isoform_length=3011;expected_accuracy=0.992     | 1255 | 2790 | 1    | 1258 | 1416 | 297 | 25   | 130 |
| cb5564_c6/f3p0/2246<br>isoform=cb5564_c6;full_length_coverage=3;non_full_length_coverage=0;isoform_length=2246;expected_accuracy=0.999                                                                       | gnl BL_ORD_ID 44673 cb5564_c2/f3p1/2892<br>isoform=cb5564_c2;full_length_coverage=3;non_full_length_coverage=1;isoform_length=2892;expected_accuracy=0.999           | 156  | 2246 | 1    | 159  | 793  | 288 | 104  | 262 |
| cb8564_c66877/f3p0/2938<br>isoform=cb8564_c66877;full_length_coverage=3;non_full_length_coverage=0;isoform_length=2938;expected_accuracy=0.996                                                               | gnl BL_ORD_ID 11240 cb8564_c145553/f1p3/3270<br>isoform=cb8564_c145553;full_length_coverage=1;non_full_length_coverage=3;isoform_length=3270;expected_accuracy=0.996 | 562  | 2890 | 60   | 564  | 942  | 327 | 1    | 505 |

|                                                                                                                                                  |                                                                                                                                                                         |     |      |      |      |      |      |      |      |
|--------------------------------------------------------------------------------------------------------------------------------------------------|-------------------------------------------------------------------------------------------------------------------------------------------------------------------------|-----|------|------|------|------|------|------|------|
| cb8564_c181853/f1p0/2119<br>isoform=cb8564_c181853;full_length_coverage=1;non_full_length_coverage=0;isoform_length=2119;expected_accuracy=0.997 | gnl BL_ORD_ID 14529      cb8564_c44074/f1p1/2922<br>isoform=cb8564_c44074;full_length_coverage=1;non_full_length_coverage=1;isoform_length=2922;expected_accuracy=0.994 | 1   | 1339 | 1334 | 2119 | 1    | 1330 | 2146 | 2921 |
| cb5900_c94/f1p0/2004<br>isoform=cb5900_c94;full_length_coverage=1;non_full_length_coverage=0;isoform_length=2004;expected_accuracy=1.000         | gnl BL_ORD_ID 74605      cb5900_c77/f1p0/3189                                                                                                                           | 1   | 1222 | 1219 | 2004 | 670  | 1886 | 2357 | 3142 |
| cb16973_c0/f1p1/1620<br>isoform=cb16973_c0;full_length_coverage=1;non_full_length_coverage=1;isoform_length=1620;expected_accuracy=0.992         | gnl BL_ORD_ID 16537      cb8564_c47909/f1p0/3196<br>isoform=cb8564_c47909;full_length_coverage=1;non_full_length_coverage=0;isoform_length=3196;expected_accuracy=0.996 | 166 | 1618 | 25   | 167  | 1746 | 3196 | 1361 | 1504 |
| cb4016_c32/f1p0/1913<br>isoform=cb4016_c32;full_length_coverage=1;non_full_length_coverage=0;isoform_length=1913;expected_accuracy=0.995         | gnl BL_ORD_ID 71724      cb4016_c31/f1p0/2568                                                                                                                           | 191 | 1930 | 25   | 194  | 780  | 2519 | 181  | 352  |
| cb14792_c2/f1p0/1864<br>isoform=cb14792_c2;full_length_coverage=1;non_full_length_coverage=0;isoform_length=1864;expected_accuracy=0.995         | gnl BL_ORD_ID 53171      cb8564_c118027/f1p0/2767                                                                                                                       | 1   | 1524 | 1519 | 1850 | 167  | 1690 | 1946 | 2277 |
| cb7550_c1/f2p1/1771<br>isoform=cb7550_c1;full_length_coverage=2;non_full_length_coverage=1;isoform_length=1771;expected_accuracy=0.998           | gnl BL_ORD_ID 50589      cb7550_c4/f1p1/2591                                                                                                                            | 1   | 1035 | 1030 | 1771 | 90   | 1130 | 1729 | 2481 |
| cb6169_c3/f1p0/1711<br>isoform=cb6169_c3;full_length_coverage=1;non_full_length_coverage=0;isoform_length=1711;expected_accuracy=0.995           | gnl BL_ORD_ID 74997      cb6169_c0/f1p0/2898                                                                                                                            | 1   | 1352 | 1350 | 1729 | 1    | 1353 | 2431 | 2809 |
| cb16166_c4/f1p0/1739<br>isoform=cb16166_c4;full_length_coverage=1;non_full_length_coverage=0;isoform_length=1739;expected_accuracy=0.995         | gnl BL_ORD_ID 54528      cb8564_c125341/f1p0/3014                                                                                                                       | 1   | 1297 | 1296 | 1739 | 240  | 1538 | 2549 | 2992 |

|                                                                                                                      |                                                                                                                      |                          |     |      |      |      |      |      |      |      |
|----------------------------------------------------------------------------------------------------------------------|----------------------------------------------------------------------------------------------------------------------|--------------------------|-----|------|------|------|------|------|------|------|
| length_coverage=0;isoform_length=1739;expected_accuracy=0.995                                                        |                                                                                                                      |                          |     |      |      |      |      |      |      |      |
| cb1656_c15/f1p1/3875                                                                                                 | gnl BL_ORD_ID 31007                                                                                                  | cb1656_c7/f1p1/3974      |     |      |      |      |      |      |      |      |
|                                                                                                                      | isoform=cb1656_c7;full_length_coverage=1;non_full_length_coverage=1;isoform_length=3974;expected_accuracy=0.997      |                          | 2   | 2978 | 2979 | 3840 | 1    | 2976 | 3114 | 3974 |
| cb8564_c36731/f1p2/2761                                                                                              | gnl BL_ORD_ID 55377                                                                                                  | cb8564_c39822/f1p0/3306  | 1   | 1977 | 1972 | 2737 | 1    | 1976 | 2405 | 3169 |
| cb8564_c118486/f1p0/2843                                                                                             | gnl BL_ORD_ID 10969                                                                                                  | cb8564_c115641/f1p0/4863 |     |      |      |      |      |      |      |      |
| isoform=cb8564_c118486;full_length_coverage=1;non_full_length_coverage=0;isoform_length=2843;expected_accuracy=0.994 | isoform=cb8564_c115641;full_length_coverage=1;non_full_length_coverage=0;isoform_length=4863;expected_accuracy=0.997 |                          | 16  | 2311 | 2311 | 2843 | 1839 | 4136 | 4331 | 4863 |
| cb8564_c42959/f1p0/3330                                                                                              | gnl BL_ORD_ID 13527                                                                                                  | cb8564_c21762/f3p4/3985  |     |      |      |      |      |      |      |      |
|                                                                                                                      | isoform=cb8564_c21762;full_length_coverage=3;non_full_length_coverage=4;isoform_length=3985;expected_accuracy=1.000  |                          | 121 | 3198 | 1    | 125  | 829  | 3906 | 14   | 137  |
| cb8564_c13598/f1p0/3018                                                                                              | gnl BL_ORD_ID 13013                                                                                                  | cb8564_c17114/f4p0/3443  |     |      |      |      |      |      |      |      |
| isoform=cb8564_c13598;full_length_coverage=1;non_full_length_coverage=0;isoform_length=3018;expected_accuracy=0.997  | isoform=cb8564_c17114;full_length_coverage=4;non_full_length_coverage=0;isoform_length=3443;expected_accuracy=1.000  |                          | 175 | 3016 | 1    | 180  | 401  | 3243 | 2    | 181  |
| cb16315_c3/f1p0/1559                                                                                                 | gnl BL_ORD_ID 43942                                                                                                  | cb4391_c2/f1p0/3515      |     |      |      |      |      |      |      |      |
| isoform=cb16315_c3;full_length_coverage=1;non_full_length_coverage=0;isoform_length=1559;expected_accuracy=0.992     | isoform=cb4391_c2;full_length_coverage=1;non_full_length_coverage=0;isoform_length=3515;expected_accuracy=0.997      |                          | 184 | 1559 | 3    | 187  | 2063 | 3429 | 45   | 227  |
| cb8564_c77994/f1p2/2630                                                                                              | gnl BL_ORD_ID 56574                                                                                                  | cb8564_c5209/f1p0/3174   | 1   | 1819 | 1815 | 2630 | 8    | 1827 | 1971 | 2787 |



|                                                                                                                                                                                                             |                                                                                                                                                                                         |     |      |      |      |     |          |      |          |
|-------------------------------------------------------------------------------------------------------------------------------------------------------------------------------------------------------------|-----------------------------------------------------------------------------------------------------------------------------------------------------------------------------------------|-----|------|------|------|-----|----------|------|----------|
| ull_length_coverage=2;isoform_length=2630;expected_accuracy=0.998<br>cb416_c58/f1p0/2505<br>isoform=cb416_c58;full_length_coverage=1;non_full_length_coverage=0;isoform_length=2505;expected_accuracy=0.992 | gnl BL_ORD_ID 72147 cb416_c21/f1p0/3162                                                                                                                                                 | 286 | 2505 | 4    | 287  | 743 | 294<br>3 | 312  | 592      |
| cb2735_c7/f1p3/3636<br>isoform=cb2735_c7;full_length_coverage=1;non_full_length_coverage=3;isoform_length=3636;expected_accuracy=0.997                                                                      | gnl BL_ORD_ID 38523                      cb2735_c8/f1p3/4461<br>isoform=cb2735_c8;full_length_coverage=1;non_full_length_coverage=3;isoform_length=4461;expected_accuracy=0.997         | 1   | 2976 | 2974 | 3539 | 1   | 298<br>0 | 3889 | 446<br>1 |
| cb8564_c43401/f1p2/3025<br>isoform=cb8564_c43401;full_length_coverage=1;non_full_length_coverage=2;isoform_length=3025;expected_accuracy=0.995                                                              | gnl BL_ORD_ID 55920 cb8564_c48949/f1p0/4357                                                                                                                                             | 1   | 2352 | 2353 | 3025 | 2   | 229<br>3 | 2847 | 350<br>7 |
| cb8288_c8/f1p0/1153                                                                                                                                                                                         | gnl BL_ORD_ID 9500                      cb8288_c7/f1p0/1418<br>isoform=cb8288_c7;full_length_coverage=1;non_full_length_coverage=0;isoform_length=1418;expected_accuracy=0.992          | 170 | 1062 | 2    | 170  | 526 | 141<br>8 | 9    | 177      |
| cb6456_c1/f2p0/2477<br>isoform=cb6456_c1;full_length_coverage=2;non_full_length_coverage=0;isoform_length=2477;expected_accuracy=1.000                                                                      | gnl BL_ORD_ID 4478                      cb6456_c0/f2p0/2553<br>isoform=cb6456_c0;full_length_coverage=2;non_full_length_coverage=0;isoform_length=2553;expected_accuracy=0.993          | 1   | 1963 | 1962 | 2454 | 1   | 195<br>7 | 2060 | 255<br>3 |
| cb8564_c40109/f1p0/2886                                                                                                                                                                                     | gnl BL_ORD_ID 14291                      cb8564_c39261/f1p0/3083<br>isoform=cb8564_c39261;full_length_coverage=1;non_full_length_coverage=0;isoform_length=3083;expected_accuracy=0.994 | 1   | 1598 | 1596 | 2862 | 1   | 159<br>7 | 1821 | 308<br>3 |

|                                                                                                                                              |                                            |     |      |      |      |      |          |      |          |
|----------------------------------------------------------------------------------------------------------------------------------------------|--------------------------------------------|-----|------|------|------|------|----------|------|----------|
| cb8564_c3183/f2p1/2280<br>isoform=cb8564_c3183;full_length_coverage=2;non_full_length_coverage=1;isoform_length=2280;expected_accuracy=0.994 | gnl BL_ORD_ID 54863 cb8564_c3179/f1p0/3204 | 355 | 2280 | 8    | 355  | 1013 | 294<br>2 | 1    | 344      |
| cb6297_c12/f1p0/2314<br>isoform=cb6297_c18;full_length_coverage=1;non_full_length_coverage=0;isoform_length=5398;expected_accuracy=0.997     | gnl BL_ORD_ID 4329 cb6297_c18/f1p0/5398    | 423 | 2174 | 50   | 425  | 3646 | 539<br>8 | 2    | 375      |
| cb6412_c5/f1p0/2729<br>isoform=cb5900_c142;full_length_coverage=1;non_full_length_coverage=0;isoform_length=2588;expected_accuracy=0.993     | gnl BL_ORD_ID 47500 cb6412_c4/f1p0/2858    | 21  | 2411 | 2407 | 2741 | 4    | 239<br>4 | 2516 | 285<br>0 |
| cb5900_c142/f1p0/2588<br>isoform=cb5900_c142;full_length_coverage=1;non_full_length_coverage=0;isoform_length=2588;expected_accuracy=0.993   | gnl BL_ORD_ID 73465 cb5900_c127/f1p0/2926  | 1   | 2275 | 2274 | 2535 | 68   | 234<br>3 | 2607 | 287<br>8 |
| cb9143_c30/f2p0/2817<br>isoform=cb9143_c30;full_length_coverage=2;non_full_length_coverage=0;isoform_length=2817;expected_accuracy=0.996     | gnl BL_ORD_ID 19564 cb9143_c31/f2p0/2946   | 199 | 2779 | 1    | 203  | 331  | 291<br>2 | 1    | 197      |
| cb322_c35/f1p0/3437<br>isoform=cb322_c35;full_length_coverage=1;non_full_length_coverage=0;isoform_length=3437;expected_accuracy=0.997       | gnl BL_ORD_ID 69560 cb322_c25/f1p0/3845    | 114 | 3413 | 1    | 119  | 375  | 366<br>1 | 6    | 123      |
| cb2061_c13/f1p1/1591<br>isoform=cb2061_c13;full_length_coverage=1;non_full_length_coverage=1;isoform_length=1591;expected_accuracy=0.991     | gnl BL_ORD_ID 35375 cb2061_c7/f1p0/1923    | 145 | 1591 | 1    | 144  | 428  | 187<br>5 | 1    | 145      |

|                                                                                                                                                  |                                                                                                                                                                                           |      |      |      |      |      |          |      |          |
|--------------------------------------------------------------------------------------------------------------------------------------------------|-------------------------------------------------------------------------------------------------------------------------------------------------------------------------------------------|------|------|------|------|------|----------|------|----------|
| cb12_c30/f1p2/4443<br>isoform=cb12_c30;full_length_coverage=1;non_full_length_coverage=2;isoform_length=4443;expected_accuracy=0.992             | gnl BL_ORD_ID 61079 cb12_c11/f1p2/4713                                                                                                                                                    | 373  | 4419 | 2    | 378  | 659  | 470<br>6 | 2    | 383      |
| cb8564_c40598/f1p4/3119                                                                                                                          | gnl BL_ORD_ID 55521 cb8564_c44014/f1p0/3720                                                                                                                                               | 25   | 2732 | 2729 | 3058 | 40   | 274<br>5 | 2866 | 319<br>5 |
| cb8564_c15348/f1p4/2577<br>isoform=cb8564_c15348;full_length_coverage=1;non_full_length_coverage=4;isoform_length=2577;expected_accuracy=0.997   | gnl BL_ORD_ID 56381 cb8564_c75626/f1p2/3199                                                                                                                                               | 2    | 2086 | 2084 | 2577 | 4    | 2116     | 2611 | 310<br>4 |
| cb1573_c41/f1p0/1724<br>isoform=cb1573_c41;full_length_coverage=1;non_full_length_coverage=0;isoform_length=1724;expected_accuracy=1.000         | gnl BL_ORD_ID 30371                      cb1573_c7/f1p2/3841<br>isoform=cb1573_c7;full_length_coverage=1;non_full_length_coverage=2;isoform_length=3841;expected_accuracy=1.000           | 1    | 1319 | 1314 | 1661 | 33   | 134<br>4 | 3500 | 383<br>9 |
| cb8564_c186243/f1p0/2948<br>isoform=cb8564_c186243;full_length_coverage=1;non_full_length_coverage=0;isoform_length=2948;expected_accuracy=0.995 | gnl BL_ORD_ID 12405                      cb8564_c146025/f2p1/3347<br>isoform=cb8564_c146025;full_length_coverage=2;non_full_length_coverage=1;isoform_length=3347;expected_accuracy=0.996 | 1    | 1986 | 1981 | 2948 | 1    | 198<br>6 | 2150 | 3118     |
| cb6057_c7/f1p0/1762                                                                                                                              | gnl BL_ORD_ID 45370                      cb6057_c4/f1p0/1955<br>isoform=cb6057_c4;full_length_coverage=1;non_full_length_coverage=0;isoform_length=1955;expected_accuracy=0.993           | 1    | 1404 | 1404 | 1748 | 31   | 143<br>2 | 1608 | 195<br>2 |
| cb3253_c4/f1p0/2515<br>isoform=cb3253_c4;full_length_coverage=1;non_full_length_coverage=0;isoform_length=2515;expected_accuracy=0.991           | gnl BL_ORD_ID 41324                      cb3253_c1/f1p0/3675<br>isoform=cb3253_c1;full_length_coverage=1;non_full_length_coverage=0;isoform_length=3675;expected_accuracy=0.997           | 1183 | 2514 | 1    | 1187 | 2374 | 367<br>5 | 5    | 1194     |

|                                                                                                                                                |                                                                                                                                                                      |     |      |      |      |     |      |      |      |
|------------------------------------------------------------------------------------------------------------------------------------------------|----------------------------------------------------------------------------------------------------------------------------------------------------------------------|-----|------|------|------|-----|------|------|------|
| cb5408_c1/f1p0/2926<br>isoform=cb5408_c1;full_length_coverage=1;non_full_length_coverage=0;isoform_length=2926;expected_accuracy=0.993         | gnl BL_ORD_ID 73880 cb5408_c2/f1p0/3049                                                                                                                              | 1   | 1825 | 1824 | 2852 | 28  | 1854 | 1957 | 2986 |
| cb16925_c1/f1p0/1736<br>isoform=cb16925_c1;full_length_coverage=1;non_full_length_coverage=0;isoform_length=1736;expected_accuracy=0.999       | gnl BL_ORD_ID 12359 cb8564_c126768/f1p0/2147<br>isoform=cb8564_c126768;full_length_coverage=1;non_full_length_coverage=0;isoform_length=2147;expected_accuracy=0.993 | 1   | 1127 | 1124 | 1736 | 3   | 1130 | 1485 | 2095 |
| cb322_c28/f1p0/3948                                                                                                                            | gnl BL_ORD_ID 70802 cb322_c34/f1p0/3998                                                                                                                              | 157 | 2868 | 2866 | 3815 | 1   | 2718 | 3056 | 4005 |
| cb8564_c39136/f1p0/3036<br>isoform=cb8564_c39136;full_length_coverage=1;non_full_length_coverage=0;isoform_length=3036;expected_accuracy=0.998 | gnl BL_ORD_ID 12440 cb8564_c130435/f1p3/3226<br>isoform=cb8564_c130435;full_length_coverage=1;non_full_length_coverage=3;isoform_length=3226;expected_accuracy=0.994 | 1   | 2089 | 2085 | 3035 | 2   | 2117 | 2245 | 3210 |
| cb4123_c104/f1p0/1147<br>isoform=cb4123_c104;full_length_coverage=1;non_full_length_coverage=0;isoform_length=1147;expected_accuracy=0.991     | gnl BL_ORD_ID 39737 cb4123_c69/f2p1/1387<br>isoform=cb4123_c69;full_length_coverage=2;non_full_length_coverage=1;isoform_length=1387;expected_accuracy=0.996         | 8   | 778  | 773  | 1124 | 1   | 773  | 986  | 1340 |
| cb6824_c9/f1p0/2342                                                                                                                            | gnl BL_ORD_ID 5935 cb6824_c7/f1p0/2433<br>isoform=cb6824_c7;full_length_coverage=1;non_full_length_coverage=0;isoform_length=2433;expected_accuracy=0.991            | 107 | 2307 | 1    | 111  | 243 | 2432 | 1    | 111  |
| cb8564_c20384/f1p4/2475<br>isoform=cb8564_c20384;full_length_coverage=1;non_full_length_coverage=4;isoform_length=2475;expected_accuracy=0.999 | gnl BL_ORD_ID 52656 cb8564_c10132/f1p8/3379                                                                                                                          | 1   | 1492 | 1493 | 2363 | 1   | 1492 | 835  | 1706 |

|                                                                                                                                                  |                                                                                                                                                                      |      |      |      |      |      |      |      |      |
|--------------------------------------------------------------------------------------------------------------------------------------------------|----------------------------------------------------------------------------------------------------------------------------------------------------------------------|------|------|------|------|------|------|------|------|
| cb8564_c53418/f1p0/2602<br>isoform=cb8564_c53418;full_length_coverage=1;non_full_length_coverage=0;isoform_length=2602;expected_accuracy=0.991   | gnl BL_ORD_ID 55529 cb8564_c44286/f1p0/2747                                                                                                                          | 1171 | 2548 | 1    | 1168 | 1278 | 2665 | 2    | 1169 |
| cb8564_c45300/f1p4/3014<br>isoform=cb8564_c45300;full_length_coverage=1;non_full_length_coverage=4;isoform_length=3014;expected_accuracy=0.996   | gnl BL_ORD_ID 16886 cb8564_c50727/f1p0/3201<br>isoform=cb8564_c50727;full_length_coverage=1;non_full_length_coverage=0;isoform_length=3201;expected_accuracy=0.999   | 243  | 3014 | 1    | 246  | 402  | 3199 | 3    | 245  |
| cb8564_c128883/f2p0/2192<br>isoform=cb8564_c128883;full_length_coverage=2;non_full_length_coverage=0;isoform_length=2192;expected_accuracy=0.999 | gnl BL_ORD_ID 17258 cb8564_c88121/f1p0/3326<br>isoform=cb8564_c88121;full_length_coverage=1;non_full_length_coverage=0;isoform_length=3326;expected_accuracy=0.998   | 1    | 1194 | 1193 | 2189 | 5    | 1200 | 2329 | 3323 |
| cb2304_c1/f2p0/2952<br>isoform=cb2304_c1;full_length_coverage=2;non_full_length_coverage=0;isoform_length=2952;expected_accuracy=0.997           | gnl BL_ORD_ID 68425 cb2304_c10/f1p0/6051                                                                                                                             | 99   | 2952 | 1    | 101  | 2726 | 5587 | 2019 | 2119 |
| cb6742_c12/f1p0/2398                                                                                                                             | gnl BL_ORD_ID 50019 cb6742_c11/f1p0/2554                                                                                                                             | 1    | 1343 | 1342 | 2280 | 132  | 1474 | 1588 | 2531 |
| cb1291_c9/f1p1/2168<br>isoform=cb1291_c9;full_length_coverage=1;non_full_length_coverage=1;isoform_length=2168;expected_accuracy=0.993           | gnl BL_ORD_ID 26065 cb1291_c7/f1p1/2985<br>isoform=cb1291_c7;full_length_coverage=1;non_full_length_coverage=1;isoform_length=2985;expected_accuracy=0.998           | 183  | 2168 | 1    | 182  | 817  | 2794 | 271  | 453  |
| cb8564_c42814/f1p0/2151<br>isoform=cb8564_c42814;full_length_coverage=1;non_full_length_coverage=0;isoform_length=2151;expected_accuracy=0.993   | gnl BL_ORD_ID 13642 cb8564_c188095/f1p0/3177<br>isoform=cb8564_c188095;full_length_coverage=1;non_full_length_coverage=0;isoform_length=3177;expected_accuracy=0.998 | 650  | 2151 | 7    | 652  | 1653 | 3155 | 1    | 675  |

|                                                                                                                                                  |                                                                                                                                                                         |     |      |      |      |      |          |      |          |
|--------------------------------------------------------------------------------------------------------------------------------------------------|-------------------------------------------------------------------------------------------------------------------------------------------------------------------------|-----|------|------|------|------|----------|------|----------|
| cb8564_c188095/f1p0/3177<br>isoform=cb8564_c188095;full_length_coverage=1;non_full_length_coverage=0;isoform_length=3177;expected_accuracy=0.998 | gnl BL_ORD_ID 14747      cb8564_c44688/f1p1/3602<br>isoform=cb8564_c44688;full_length_coverage=1;non_full_length_coverage=1;isoform_length=3602;expected_accuracy=0.999 | 1   | 2441 | 2437 | 3159 | 1    | 244<br>4 | 2880 | 360<br>2 |
| cb7085_c11/f1p0/1882<br>isoform=cb7085_c11;full_length_coverage=1;non_full_length_coverage=0;isoform_length=1882;expected_accuracy=0.992         | gnl BL_ORD_ID 4154      cb7085_c8/f1p0/2701<br>isoform=cb7085_c8;full_length_coverage=1;non_full_length_coverage=0;isoform_length=2701;expected_accuracy=0.996          | 551 | 1882 | 70   | 553  | 1349 | 267<br>7 | 5    | 483      |
| cb5896_c10/f2p1/2427<br>isoform=cb5896_c10;full_length_coverage=2;non_full_length_coverage=1;isoform_length=2427;expected_accuracy=0.998         | gnl BL_ORD_ID 46732      cb5896_c60/f1p2/2803<br>isoform=cb5896_c60;full_length_coverage=1;non_full_length_coverage=2;isoform_length=2803;expected_accuracy=0.996       | 1   | 1304 | 1303 | 2427 | 4    | 130<br>7 | 1432 | 255<br>9 |
| cb8564_c2802/f1p0/3927                                                                                                                           | gnl BL_ORD_ID 16376      cb8564_c733/f6p0/4072<br>isoform=cb8564_c733;full_length_coverage=6;non_full_length_coverage=0;isoform_length=4072;expected_accuracy=1.000     | 1   | 2533 | 2533 | 3856 | 1    | 253<br>5 | 2750 | 407<br>2 |
| cb8564_c14743/f1p0/2123<br>isoform=cb8564_c14743;full_length_coverage=1;non_full_length_coverage=0;isoform_length=2123;expected_accuracy=1.000   | gnl BL_ORD_ID 55196      cb8564_c35205/f1p1/2269                                                                                                                        | 1   | 1712 | 1710 | 2123 | 2    | 171<br>3 | 1850 | 226<br>3 |
| cb8564_c36689/f1p1/2368<br>isoform=cb8564_c36689;full_length_coverage=1;non_full_length_coverage=1;isoform_length=2368;expected_accuracy=0.991   | gnl BL_ORD_ID 15104      cb8564_c37866/f1p3/2874<br>isoform=cb8564_c37866;full_length_coverage=1;non_full_length_coverage=3;isoform_length=2874;expected_accuracy=0.990 | 1   | 1709 | 1706 | 2368 | 1    | 169<br>1 | 2198 | 286<br>3 |
| cb8564_c2797/f1p0/2268<br>isoform=cb8564_c2797;full_length_coverage=1;non_full_length_coverage=0;isoform_length=2268;expected_accuracy=0.998     | gnl BL_ORD_ID 57211      cb8564_c86767/f1p0/2702                                                                                                                        | 1   | 1374 | 1370 | 2191 | 72   | 141<br>6 | 1670 | 249<br>1 |

|                                                                                                                                                                                                                                                                                                                                                                                                                                                                                                                       |                                                                                                                                                                     |     |      |      |      |     |      |      |      |
|-----------------------------------------------------------------------------------------------------------------------------------------------------------------------------------------------------------------------------------------------------------------------------------------------------------------------------------------------------------------------------------------------------------------------------------------------------------------------------------------------------------------------|---------------------------------------------------------------------------------------------------------------------------------------------------------------------|-----|------|------|------|-----|------|------|------|
| l_length_coverage=0;isoform_length=2268;expected_accuracy=0.992<br>cb8564_c38219/f2p2/2476<br>isoform=cb8564_c38219;full_length_coverage=2;non_full_length_coverage=2;isoform_length=2476;expected_accuracy=0.996<br>cb8564_c40764/f1p0/2563<br>isoform=cb8564_c40764;full_length_coverage=1;non_full_length_coverage=0;isoform_length=2563;expected_accuracy=0.997<br>cb8564_c43399/f1p0/2654<br>isoform=cb8564_c43399;full_length_coverage=1;non_full_length_coverage=0;isoform_length=2654;expected_accuracy=0.999 | gnl BL_ORD_ID 55688 cb8564_c4747/f1p0/2838                                                                                                                          | 1   | 1430 | 1428 | 2475 | 142 | 1559 | 1807 | 2853 |
| cb2493_c40/f1p0/3431<br>cb912_c15/f1p0/2991<br>isoform=cb912_c15;full_length_coverage=1;non_full_length_coverage=0;isoform_length=2991;expected_accuracy=0.999                                                                                                                                                                                                                                                                                                                                                        | gnl BL_ORD_ID 55839 cb8564_c43677/f1p0/3269                                                                                                                         | 1   | 2167 | 2162 | 2563 | 55  | 2218 | 2425 | 2824 |
| cb912_c15/f1p0/2991<br>isoform=cb912_c15;full_length_coverage=1;non_full_length_coverage=0;isoform_length=2991;expected_accuracy=0.999                                                                                                                                                                                                                                                                                                                                                                                | gnl BL_ORD_ID 57289 cb8564_c89122/f1p0/3335                                                                                                                         | 22  | 2367 | 2363 | 2641 | 81  | 2421 | 2637 | 2915 |
| cb2493_c40/f1p0/3431<br>cb912_c15/f1p0/2991<br>isoform=cb912_c15;full_length_coverage=1;non_full_length_coverage=0;isoform_length=2991;expected_accuracy=0.999                                                                                                                                                                                                                                                                                                                                                        | gnl BL_ORD_ID 37222 cb2493_c9/f3p4/3744<br>isoform=cb2493_c9;full_length_coverage=3;non_full_length_coverage=4;isoform_length=3744;expected_accuracy=0.997          | 485 | 3408 | 56   | 488  | 746 | 3689 | 5    | 435  |
| cb912_c15/f1p0/2991<br>isoform=cb912_c15;full_length_coverage=1;non_full_length_coverage=0;isoform_length=2991;expected_accuracy=0.999                                                                                                                                                                                                                                                                                                                                                                                | gnl BL_ORD_ID 59088 cb912_c11/f1p0/3488                                                                                                                             | 1   | 2472 | 2469 | 2991 | 269 | 2741 | 2878 | 3399 |
| cb9448_c9/f1p1/1806<br>cb16925_c1/f1p0/1736<br>isoform=cb16925_c1;full_length_coverage=1;non_full_length_coverage=0;isoform_length=1736;expected_accuracy=0.999                                                                                                                                                                                                                                                                                                                                                       | gnl BL_ORD_ID 58724 cb9448_c6/f1p1/2077                                                                                                                             | 459 | 1802 | 54   | 460  | 649 | 1980 | 32   | 438  |
| cb16925_c1/f1p0/1736<br>isoform=cb16925_c1;full_length_coverage=1;non_full_length_coverage=0;isoform_length=1736;expected_accuracy=0.999                                                                                                                                                                                                                                                                                                                                                                              | gnl BL_ORD_ID 9596 cb8564_c122271/f1p0/2171<br>isoform=cb8564_c122271;full_length_coverage=1;non_full_length_coverage=0;isoform_length=2171;expected_accuracy=0.999 | 1   | 1127 | 1124 | 1736 | 1   | 1128 | 1482 | 2092 |

|                                                                                                                                                                                                                                                                                                                                                                                                                                                                                                                                                                                                                                                                                                                                                                                                                                                                                                                                                             |                                                                                                                                                                                                                                                                                                                                                                                                                                                                                                                                                                                                                                                                                                                                                                                                                                                                                                                                                                                                |      |      |      |      |      |      |      |      |
|-------------------------------------------------------------------------------------------------------------------------------------------------------------------------------------------------------------------------------------------------------------------------------------------------------------------------------------------------------------------------------------------------------------------------------------------------------------------------------------------------------------------------------------------------------------------------------------------------------------------------------------------------------------------------------------------------------------------------------------------------------------------------------------------------------------------------------------------------------------------------------------------------------------------------------------------------------------|------------------------------------------------------------------------------------------------------------------------------------------------------------------------------------------------------------------------------------------------------------------------------------------------------------------------------------------------------------------------------------------------------------------------------------------------------------------------------------------------------------------------------------------------------------------------------------------------------------------------------------------------------------------------------------------------------------------------------------------------------------------------------------------------------------------------------------------------------------------------------------------------------------------------------------------------------------------------------------------------|------|------|------|------|------|------|------|------|
| length_coverage=0;isoform_length=1736;expected_accuracy=0.999<br>cb8564_c76946/f4p0/2069<br>isoform=cb8564_c76946;full_length_coverage=4;non_full_length_coverage=0;isoform_length=2069;expected_accuracy=0.998<br>cb11915_c7/f1p2/1523<br>isoform=cb11915_c7;full_length_coverage=1;non_full_length_coverage=2;isoform_length=1523;expected_accuracy=0.992<br>cb8564_c12355/f1p9/2685<br>isoform=cb8564_c12355;full_length_coverage=1;non_full_length_coverage=9;isoform_length=2685;expected_accuracy=0.999<br>cb8564_c48551/f1p0/2454<br>isoform=cb8564_c48551;full_length_coverage=1;non_full_length_coverage=0;isoform_length=2454;expected_accuracy=0.995<br>cb8113_c1/f1p1/2789<br>isoform=cb8113_c1;full_length_coverage=1;non_full_length_coverage=1;isoform_length=2789;expected_accuracy=0.998<br>cb8564_c38947/f1p0/2650<br>isoform=cb8564_c38947;full_length_coverage=1;non_full_length_coverage=0;isoform_length=2650;expected_accuracy=0.996 | ull_length_coverage=0;isoform_length=2171;expected_accuracy=0.993<br>gnl BL_ORD_ID 17274      cb8564_c82521/f1p0/2413<br>isoform=cb8564_c82521;full_length_coverage=1;non_full_length_coverage=0;isoform_length=2413;expected_accuracy=0.999<br>gnl BL_ORD_ID 60410   cb11915_c8/f1p3/1864<br>gnl BL_ORD_ID 9350      cb8564_c11826/f1p0/2916<br>isoform=cb8564_c11826;full_length_coverage=1;non_full_length_coverage=0;isoform_length=2916;expected_accuracy=0.997<br>gnl BL_ORD_ID 16169      cb8564_c66877/f3p0/2938<br>isoform=cb8564_c66877;full_length_coverage=3;non_full_length_coverage=0;isoform_length=2938;expected_accuracy=0.996<br>gnl BL_ORD_ID 8749      cb8113_c3/f1p1/3914<br>isoform=cb8113_c3;full_length_coverage=1;non_full_length_coverage=1;isoform_length=3914;expected_accuracy=1.000<br>gnl BL_ORD_ID 13273      cb8564_c188193/f1p0/2849<br>isoform=cb8564_c188193;full_length_coverage=1;non_full_length_coverage=0;isoform_length=2849;expected_accuracy=0.997 | 1    | 1324 | 1322 | 1976 | 4    | 1328 | 1759 | 2413 |
|                                                                                                                                                                                                                                                                                                                                                                                                                                                                                                                                                                                                                                                                                                                                                                                                                                                                                                                                                             |                                                                                                                                                                                                                                                                                                                                                                                                                                                                                                                                                                                                                                                                                                                                                                                                                                                                                                                                                                                                | 1    | 1133 | 1128 | 1523 | 1    | 1137 | 1446 | 1842 |
|                                                                                                                                                                                                                                                                                                                                                                                                                                                                                                                                                                                                                                                                                                                                                                                                                                                                                                                                                             |                                                                                                                                                                                                                                                                                                                                                                                                                                                                                                                                                                                                                                                                                                                                                                                                                                                                                                                                                                                                | 1312 | 2685 | 103  | 1313 | 1543 | 2916 | 86   | 1296 |
|                                                                                                                                                                                                                                                                                                                                                                                                                                                                                                                                                                                                                                                                                                                                                                                                                                                                                                                                                             |                                                                                                                                                                                                                                                                                                                                                                                                                                                                                                                                                                                                                                                                                                                                                                                                                                                                                                                                                                                                | 1    | 1438 | 1438 | 2454 | 60   | 1496 | 1766 | 2783 |
|                                                                                                                                                                                                                                                                                                                                                                                                                                                                                                                                                                                                                                                                                                                                                                                                                                                                                                                                                             |                                                                                                                                                                                                                                                                                                                                                                                                                                                                                                                                                                                                                                                                                                                                                                                                                                                                                                                                                                                                | 1    | 1899 | 1898 | 2789 | 21   | 1915 | 2994 | 3886 |
|                                                                                                                                                                                                                                                                                                                                                                                                                                                                                                                                                                                                                                                                                                                                                                                                                                                                                                                                                             |                                                                                                                                                                                                                                                                                                                                                                                                                                                                                                                                                                                                                                                                                                                                                                                                                                                                                                                                                                                                | 1    | 1441 | 1436 | 2650 | 1    | 1439 | 1635 | 2849 |



|                          |                                                                                                                                                                           |     |      |      |      |      |      |      |      |
|--------------------------|---------------------------------------------------------------------------------------------------------------------------------------------------------------------------|-----|------|------|------|------|------|------|------|
| cb8564_c41162/f1p0/3158  | gnl BL_ORD_ID 16681      cb8564_c54233/f1p1/3194<br>isoform=cb8564_c54233;full_length_coverage=1;non_full_length_coverage=1;isoform_length=3194;expected_accuracy=0.995   | 2   | 2553 | 2548 | 3036 | 7    | 2575 | 2706 | 3194 |
| cb8564_c37498/f1p0/3279  | gnl BL_ORD_ID 15552      cb8564_c53792/f1p0/4512<br>isoform=cb8564_c37498;full_length_coverage=1;non_full_length_coverage=0;isoform_length=3279;expected_accuracy=0.999   | 169 | 3279 | 1    | 170  | 1412 | 4512 | 61   | 231  |
| cb8564_c69457/f3p14/2821 | gnl BL_ORD_ID 13176      cb8564_c15957/f1p0/2838<br>isoform=cb8564_c69457;full_length_coverage=3;non_full_length_coverage=14;isoform_length=2821;expected_accuracy=0.997  | 1   | 1693 | 1692 | 2745 | 1    | 1684 | 1792 | 2838 |
| cb1138_c11/f1p2/3819     | gnl BL_ORD_ID 59175      cb1138_c19/f1p0/4197<br>isoform=cb1138_c11;full_length_coverage=1;non_full_length_coverage=2;isoform_length=3819;expected_accuracy=0.997         | 1   | 1920 | 1920 | 3819 | 47   | 1967 | 2251 | 4153 |
| cb5643_c46/f1p0/3297     | gnl BL_ORD_ID 45701      cb5643_c45/f1p0/3996<br>isoform=cb5643_c46;full_length_coverage=1;non_full_length_coverage=0;isoform_length=3297;expected_accuracy=0.996         | 1   | 2201 | 2199 | 3297 | 141  | 2347 | 2765 | 3871 |
| cb17137_c7/f1p1/1834     | gnl BL_ORD_ID 11611      cb8564_c146555/f4p2/2300<br>isoform=cb8564_c146555;full_length_coverage=4;non_full_length_coverage=2;isoform_length=2300;expected_accuracy=0.996 | 1   | 1291 | 1287 | 1753 | 97   | 1387 | 1758 | 2224 |
| cb10054_c49/f1p1/1123    | gnl BL_ORD_ID 47994      cb10054_c53/f1p2/1445<br>isoform=cb10054_c49;full_length_coverage=1;non_full                                                                     | 258 | 1122 | 6    | 262  | 445  | 1309 | 1    | 264  |

|                                                                |                                                                                                                     |                         |     |      |      |      |      |      |      |      |
|----------------------------------------------------------------|---------------------------------------------------------------------------------------------------------------------|-------------------------|-----|------|------|------|------|------|------|------|
| _length_coverage=1;isoform_length=1123;expected_accuracy=1.000 |                                                                                                                     |                         |     |      |      |      |      |      |      |      |
| cb150_c10/f1p0/1858                                            | gnl BL_ORD_ID 29110                                                                                                 | cb150_c6/f1p0/4821      | 1   | 1172 | 1171 | 1851 | 1    | 1172 | 4145 | 4820 |
|                                                                | isoform=cb150_c6;full_length_coverage=1;non_full_length_coverage=0;isoform_length=4821;expected_accuracy=0.997      |                         |     |      |      |      |      |      |      |      |
| cb8564_c34921/f1p4/3083                                        | gnl BL_ORD_ID 14411                                                                                                 | cb8564_c44258/f1p0/3202 | 406 | 3073 | 8    | 401  | 509  | 3202 | 5    | 403  |
|                                                                | isoform=cb8564_c34921;full_length_coverage=1;non_full_length_coverage=4;isoform_length=3083;expected_accuracy=0.994 |                         |     |      |      |      |      |      |      |      |
| cb8564_c35645/f1p0/2804                                        | gnl BL_ORD_ID 16331                                                                                                 | cb8564_c75969/f1p1/2798 | 150 | 2677 | 15   | 151  | 250  | 2798 | 1    | 137  |
|                                                                | isoform=cb8564_c75969;full_length_coverage=1;non_full_length_coverage=1;isoform_length=2798;expected_accuracy=0.997 |                         |     |      |      |      |      |      |      |      |
| cb8564_c35037/f1p0/3377                                        | gnl BL_ORD_ID 14662                                                                                                 | cb8564_c42236/f1p0/4544 | 1   | 2664 | 2664 | 3365 | 6    | 2670 | 3838 | 4542 |
|                                                                | isoform=cb8564_c35037;full_length_coverage=1;non_full_length_coverage=0;isoform_length=3377;expected_accuracy=0.996 |                         |     |      |      |      |      |      |      |      |
| cb2314_c5/f1p0/3736                                            | gnl BL_ORD_ID 37916                                                                                                 | cb2314_c2/f1p0/3840     | 1   | 3224 | 3224 | 3709 | 1    | 3220 | 3335 | 3819 |
|                                                                | isoform=cb2314_c2;full_length_coverage=1;non_full_length_coverage=0;isoform_length=3840;expected_accuracy=0.995     |                         |     |      |      |      |      |      |      |      |
| cb4066_c13/f1p0/2044                                           | gnl BL_ORD_ID 40793                                                                                                 | cb4066_c15/f1p0/3532    | 351 | 2028 | 43   | 352  | 1827 | 3502 | 1    | 306  |
|                                                                | isoform=cb4066_c15;full_length_coverage=1;non_full_length_coverage=0;isoform_length=3532;expected_accuracy=0.992    |                         |     |      |      |      |      |      |      |      |

|                                                                                                                                                  |                                                                                                                                                                      |      |      |      |      |      |      |      |      |
|--------------------------------------------------------------------------------------------------------------------------------------------------|----------------------------------------------------------------------------------------------------------------------------------------------------------------------|------|------|------|------|------|------|------|------|
| cb8564_c43399/f1p0/2654<br>isoform=cb8564_c43399;full_length_coverage=1;non_full_length_coverage=0;isoform_length=2654;expected_accuracy=0.999   | gnl BL_ORD_ID 55574 cb8564_c45699/f1p0/3005                                                                                                                          | 1    | 2367 | 2363 | 2654 | 1    | 2344 | 2560 | 2849 |
| cb8564_c53418/f1p0/2602<br>isoform=cb8564_c53418;full_length_coverage=1;non_full_length_coverage=0;isoform_length=2602;expected_accuracy=0.991   | gnl BL_ORD_ID 17747 cb8564_c81734/f1p1/2771<br>isoform=cb8564_c81734;full_length_coverage=1;non_full_length_coverage=1;isoform_length=2771;expected_accuracy=0.995   | 1163 | 2540 | 1    | 1168 | 1391 | 2771 | 124  | 1290 |
| cb1665_c3/f1p0/3650                                                                                                                              | gnl BL_ORD_ID 63840 cb1665_c0/f1p0/4001                                                                                                                              | 1    | 2893 | 2893 | 3608 | 129  | 3038 | 3166 | 3875 |
| cb1333_c101/f1p0/1395<br>isoform=cb1333_c101;full_length_coverage=1;non_full_length_coverage=0;isoform_length=1395;expected_accuracy=0.997       | gnl BL_ORD_ID 61260 cb1333_c110/f1p0/5352                                                                                                                            | 149  | 1395 | 27   | 150  | 3730 | 4974 | 29   | 152  |
| cb8564_c109800/f6p1/3270<br>isoform=cb8564_c109800;full_length_coverage=6;non_full_length_coverage=1;isoform_length=3270;expected_accuracy=0.998 | gnl BL_ORD_ID 12106 cb8564_c146659/f3p0/3534<br>isoform=cb8564_c146659;full_length_coverage=3;non_full_length_coverage=0;isoform_length=3534;expected_accuracy=0.998 | 1    | 2029 | 2027 | 3235 | 63   | 2095 | 2324 | 3534 |
| cb2954_c4/f1p0/3606                                                                                                                              | gnl BL_ORD_ID 36660 cb2954_c1/f2p0/3661<br>isoform=cb2954_c1;full_length_coverage=2;non_full_length_coverage=0;isoform_length=3661;expected_accuracy=0.998           | 2    | 2969 | 2969 | 3515 | 20   | 2985 | 3090 | 3635 |
| cb8564_c38035/f1p0/2770                                                                                                                          | gnl BL_ORD_ID 15153 cb8564_c36883/f1p0/3072<br>isoform=cb8564_c36883;full_length_coverage=1;non_full_length_coverage=0;isoform_length=3072;expected_accuracy=0.996   | 1    | 2035 | 2033 | 2756 | 1    | 2038 | 2228 | 2952 |

|                                                                                                                                                |                                                                                                                                                                         |      |      |      |      |      |          |      |          |
|------------------------------------------------------------------------------------------------------------------------------------------------|-------------------------------------------------------------------------------------------------------------------------------------------------------------------------|------|------|------|------|------|----------|------|----------|
| cb6345_c2/f1p1/2613<br>isoform=cb6345_c2;full_length_coverage=1;non_full_length_coverage=1;isoform_length=2613;expected_accuracy=0.996         | gnl BL_ORD_ID 5243      cb6345_c0/f2p1/2864<br>isoform=cb6345_c0;full_length_coverage=2;non_full_length_coverage=1;isoform_length=2864;expected_accuracy=1.000          | 197  | 2605 | 1    | 197  | 477  | 286<br>4 | 4    | 200      |
| cb309_c9/f1p2/4191<br>isoform=cb309_c9;full_length_coverage=1;non_full_length_coverage=2;isoform_length=4191;expected_accuracy=0.998           | gnl BL_ORD_ID 69546      cb309_c5/f1p0/4669                                                                                                                             | 1    | 3777 | 3776 | 4178 | 206  | 397<br>5 | 4184 | 458<br>5 |
| cb1545_c26/f1p0/3338<br>isoform=cb12931_c15;full_length_coverage=1;non_full_length_coverage=0;isoform_length=1493;expected_accuracy=1.000      | gnl BL_ORD_ID 61383      cb1545_c23/f1p0/3408                                                                                                                           | 1    | 2013 | 2014 | 3189 | 125  | 213<br>6 | 2020 | 319<br>5 |
| cb12931_c15/f1p0/1493<br>isoform=cb12931_c15;full_length_coverage=1;non_full_length_coverage=0;isoform_length=1493;expected_accuracy=1.000     | gnl BL_ORD_ID 55414      cb8564_c41002/f1p3/2869                                                                                                                        | 1    | 1106 | 1104 | 1493 | 6    | 1107     | 2426 | 281<br>3 |
| cb1821_c14/f1p0/2950<br>isoform=cb1821_c14;full_length_coverage=1;non_full_length_coverage=0;isoform_length=2950;expected_accuracy=0.995       | gnl BL_ORD_ID 63997      cb1821_c16/f1p1/3514                                                                                                                           | 1242 | 2950 | 1    | 1245 | 1452 | 316<br>2 | 74   | 132<br>2 |
| cb8564_c76764/f1p1/4492<br>isoform=cb14110_c13;full_length_coverage=14;non_full_length_coverage=2;isoform_length=1499;expected_accuracy=1.000  | gnl BL_ORD_ID 56122      cb8564_c70128/f1p0/4834                                                                                                                        | 1    | 3710 | 3708 | 4519 | 122  | 383<br>1 | 3983 | 479<br>4 |
| cb14110_c13/f14p2/1499<br>isoform=cb14110_c13;full_length_coverage=14;non_full_length_coverage=2;isoform_length=1499;expected_accuracy=1.000   | gnl BL_ORD_ID 26766      cb14110_c9/f1p0/1874<br>isoform=cb14110_c9;full_length_coverage=1;non_full_length_coverage=0;isoform_length=1874;expected_accuracy=0.999       | 1    | 1024 | 1022 | 1498 | 20   | 105<br>3 | 1408 | 187<br>4 |
| cb8564_c89391/f1p0/3380<br>isoform=cb8564_c88760;full_length_coverage=1;non_full_length_coverage=0;isoform_length=1874;expected_accuracy=0.999 | gnl BL_ORD_ID 19115      cb8564_c88760/f1p6/3136<br>isoform=cb8564_c88760;full_length_coverage=1;non_full_length_coverage=0;isoform_length=1874;expected_accuracy=0.999 | 13   | 2834 | 2835 | 3107 | 1    | 282<br>2 | 2681 | 295<br>3 |

|                         |                                                                                                                                                                                                                                             |     |      |      |      |     |          |      |          |
|-------------------------|---------------------------------------------------------------------------------------------------------------------------------------------------------------------------------------------------------------------------------------------|-----|------|------|------|-----|----------|------|----------|
| cb8564_c38035/f1p0/2770 | ll_length_coverage=6;isoform_length=3136;expected_accuracy=0.996<br>gnl BL_ORD_ID 14556      cb8564_c45150/f1p0/2940<br>isoform=cb8564_c45150;full_length_coverage=1;non_full_length_coverage=0;isoform_length=2940;expected_accuracy=0.992 | 1   | 2035 | 2033 | 2756 | 1   | 202<br>2 | 2211 | 293<br>2 |
| cb51_c26/f1p0/2695      | gnl BL_ORD_ID 46998      cb51_c0/f6p0/2663<br>isoform=cb51_c0;full_length_coverage=6;non_full_length_coverage=0;isoform_length=2663;expected_accuracy=1.000                                                                                 | 1   | 2090 | 2090 | 2432 | 32  | 212<br>1 | 2309 | 265<br>1 |
| cb8564_c82568/f7p1/2364 | isoform=cb8564_c82568;full_length_coverage=7;non_full_length_coverage=1;isoform_length=2364;expected_accuracy=1.000<br>gnl BL_ORD_ID 52928      cb8564_c112134/f1p0/2518                                                                    | 479 | 2364 | 77   | 478  | 565 | 245<br>0 | 2    | 403      |
| cb8564_c81580/f1p0/2450 | gnl BL_ORD_ID 11848      cb8564_c146276/f2p0/2672<br>isoform=cb8564_c146276;full_length_coverage=2;non_full_length_coverage=0;isoform_length=2672;expected_accuracy=0.995                                                                   | 1   | 1786 | 1781 | 2450 | 42  | 181<br>8 | 1957 | 262<br>5 |
| cb653_c12/f1p0/3754     | gnl BL_ORD_ID 5913      cb653_c14/f1p0/4097<br>isoform=cb653_c14;full_length_coverage=1;non_full_length_coverage=0;isoform_length=4097;expected_accuracy=0.996                                                                              | 195 | 3754 | 1    | 196  | 496 | 405<br>2 | 76   | 272      |
| cb16334_c1/f1p0/1310    | gnl BL_ORD_ID 9807      cb8564_c116631/f1p0/2583<br>isoform=cb8564_c116631;full_length_coverage=1;non_full_length_coverage=0;isoform_length=2583;expected_accuracy=0.999                                                                    | 9   | 774  | 775  | 1327 | 14  | 788      | 2027 | 258<br>0 |

|                                                                                                                                                  |                                                                                                                                                                   |      |      |      |      |      |      |      |      |
|--------------------------------------------------------------------------------------------------------------------------------------------------|-------------------------------------------------------------------------------------------------------------------------------------------------------------------|------|------|------|------|------|------|------|------|
| cb8564_c121421/f1p1/2345<br>isoform=cb8564_c121421;full_length_coverage=1;non_full_length_coverage=1;isoform_length=2345;expected_accuracy=0.998 | gnl BL_ORD_ID 52928 cb8564_c112134/f1p0/2518                                                                                                                      | 489  | 2345 | 87   | 488  | 565  | 2396 | 2    | 403  |
| cb7940_c54/f1p1/1719<br>isoform=cb7940_c54;full_length_coverage=1;non_full_length_coverage=1;isoform_length=1719;expected_accuracy=0.997         | gnl BL_ORD_ID 51641 cb7940_c15/f1p0/2221                                                                                                                          | 1    | 1366 | 1363 | 1719 | 73   | 1438 | 1634 | 1991 |
| cb12714_c29/f1p2/1583                                                                                                                            | gnl BL_ORD_ID 9350 cb8564_c11826/f1p0/2916<br>isoform=cb8564_c11826;full_length_coverage=1;non_full_length_coverage=0;isoform_length=2916;expected_accuracy=0.997 | 1    | 1295 | 1293 | 1597 | 4    | 1296 | 2612 | 2916 |
| cb3490_c19/f1p0/2989                                                                                                                             | gnl BL_ORD_ID 39292 cb3490_c28/f9p1/2949<br>isoform=cb3490_c28;full_length_coverage=9;non_full_length_coverage=1;isoform_length=2949;expected_accuracy=1.000      | 483  | 2827 | 7    | 486  | 591  | 2935 | 7    | 487  |
| cb8564_c17543/f1p10/2689<br>isoform=cb8564_c17543;full_length_coverage=1;non_full_length_coverage=10;isoform_length=2689;expected_accuracy=0.999 | gnl BL_ORD_ID 9350 cb8564_c11826/f1p0/2916<br>isoform=cb8564_c11826;full_length_coverage=1;non_full_length_coverage=0;isoform_length=2916;expected_accuracy=0.997 | 1288 | 2586 | 1    | 1289 | 1543 | 2840 | 1    | 1296 |
| cb8564_c40764/f1p0/2563<br>isoform=cb8564_c40764;full_length_coverage=1;non_full_length_coverage=0;isoform_length=2563;expected_accuracy=0.997   | gnl BL_ORD_ID 55341 cb8564_c38927/f1p0/3326                                                                                                                       | 1    | 2166 | 2162 | 2563 | 7    | 2169 | 2377 | 2777 |
| cb8564_c86938/f8p6/3219<br>isoform=cb8564_c86938;full_length_coverage=8;non_f                                                                    | gnl BL_ORD_ID 58119 cb8564_c89388/f1p0/3860                                                                                                                       | 1    | 2858 | 2861 | 3128 | 5    | 2866 | 3436 | 3695 |

|                                                                   |                                                                                                                                                                    |      |      |      |      |      |          |      |          |  |
|-------------------------------------------------------------------|--------------------------------------------------------------------------------------------------------------------------------------------------------------------|------|------|------|------|------|----------|------|----------|--|
| ull_length_coverage=6;isoform_length=3219;expected_accuracy=0.994 |                                                                                                                                                                    |      |      |      |      |      |          |      |          |  |
| cb6798_c16/f1p0/2203                                              | gnl BL_ORD_ID 50075 cb6798_c12/f1p4/2573                                                                                                                           | 577  | 2130 | 8    | 582  | 916  | 246<br>8 | 105  | 679      |  |
| cb4664_c16/f1p0/2007                                              | gnl BL_ORD_ID 42516 cb4664_c6/f1p0/3256<br>isoform=cb4664_c6;full_length_coverage=1;non_full_length_coverage=0;isoform_length=3256;expected_accuracy=0.998         | 280  | 2004 | 49   | 280  | 1523 | 325<br>6 | 1    | 232      |  |
| cb1974_c7/f1p1/3734                                               | gnl BL_ORD_ID 34705 cb1974_c6/f1p0/3999<br>isoform=cb1974_c6;full_length_coverage=1;non_full_length_coverage=0;isoform_length=3999;expected_accuracy=0.991         | 1785 | 3677 | 1    | 1786 | 2021 | 390<br>6 | 1    | 178<br>3 |  |
| cb8564_c48192/f1p6/3029                                           | gnl BL_ORD_ID 16879 cb8564_c48606/f1p1/3308<br>isoform=cb8564_c48606;full_length_coverage=1;non_full_length_coverage=1;isoform_length=3308;expected_accuracy=0.998 | 1    | 2155 | 2151 | 2871 | 1    | 215<br>1 | 2587 | 330<br>8 |  |
| cb8564_c38464/f1p0/2918                                           | gnl BL_ORD_ID 9350 cb8564_c11826/f1p0/2916<br>isoform=cb8564_c11826;full_length_coverage=1;non_full_length_coverage=0;isoform_length=2916;expected_accuracy=0.997  | 1    | 1295 | 1294 | 2596 | 4    | 129<br>6 | 1543 | 284<br>5 |  |
| cb3421_c0/f5p1/2836                                               | isoform=cb3421_c0;full_length_coverage=5;non_full_length_coverage=1;isoform_length=2836;expected_accuracy=0.998                                                    |      |      |      |      |      |          |      |          |  |
| cb8564_c87721/f1p0/2168                                           | gnl BL_ORD_ID 71191 cb3421_c13/f1p0/4144                                                                                                                           | 319  | 2825 | 33   | 319  | 1645 | 415<br>2 | 64   | 347      |  |
| isoform=cb8564_c87721;full_length_coverage=1;non_f                | gnl BL_ORD_ID 56177 cb8564_c71533/f1p0/3179                                                                                                                        | 14   | 1811 | 1809 | 2168 | 1    | 180<br>4 | 2451 | 280<br>8 |  |

|                                                                                                                       |                                                                                                                     |                         |      |      |      |      |      |      |      |      |
|-----------------------------------------------------------------------------------------------------------------------|---------------------------------------------------------------------------------------------------------------------|-------------------------|------|------|------|------|------|------|------|------|
| ull_length_coverage=0;isoform_length=2168;expected_accuracy=0.997                                                     |                                                                                                                     |                         |      |      |      |      |      |      |      |      |
| cb8564_c107573/f1p0/3286                                                                                              | gnl BL_ORD_ID 16806                                                                                                 | cb8564_c76074/f1p0/3355 |      |      |      |      |      |      |      |      |
| isoform=cb8564_c107573;full_length_coverage=11;non_full_length_coverage=0;isoform_length=3286;expected_accuracy=1.000 | isoform=cb8564_c76074;full_length_coverage=1;non_full_length_coverage=0;isoform_length=3355;expected_accuracy=0.998 |                         | 1525 | 3286 | 141  | 1526 | 1594 | 3355 | 1    | 1383 |
| cb8564_c12030/f1p0/2476                                                                                               | gnl BL_ORD_ID 54022                                                                                                 | cb8564_c17079/f1p0/3440 |      |      |      |      |      |      |      |      |
| isoform=cb8564_c12030;full_length_coverage=1;non_full_length_coverage=0;isoform_length=2476;expected_accuracy=0.996   |                                                                                                                     |                         | 1015 | 2476 | 1    | 1016 | 1801 | 3260 | 14   | 1004 |
| cb8564_c71065/f1p0/2706                                                                                               | gnl BL_ORD_ID 17583                                                                                                 | cb8564_c86974/f1p0/2846 |      |      |      |      |      |      |      |      |
| isoform=cb8564_c71065;full_length_coverage=1;non_full_length_coverage=0;isoform_length=2706;expected_accuracy=0.995   | isoform=cb8564_c86974;full_length_coverage=1;non_full_length_coverage=0;isoform_length=2846;expected_accuracy=0.995 |                         | 153  | 2705 | 1    | 155  | 293  | 2846 | 5    | 159  |
| cb10403_c23/f1p1/1720                                                                                                 | gnl BL_ORD_ID 48488                                                                                                 | cb10403_c27/f1p1/1806   |      |      |      |      |      |      |      |      |
| isoform=cb10403_c23;full_length_coverage=1;non_full_length_coverage=1;isoform_length=1720;expected_accuracy=0.997     |                                                                                                                     |                         | 1    | 1363 | 1362 | 1718 | 218  | 1579 | 1445 | 1801 |
| cb2700_c16/f1p0/2346                                                                                                  | gnl BL_ORD_ID 68736                                                                                                 | cb2700_c13/f1p0/2774    |      |      |      |      |      |      |      |      |
| isoform=cb2700_c16;full_length_coverage=1;non_full_length_coverage=0;isoform_length=2346;expected_accuracy=0.999      |                                                                                                                     |                         | 294  | 2346 | 9    | 296  | 440  | 2473 | 4    | 293  |
| cb10921_c6/f1p0/1495                                                                                                  | gnl BL_ORD_ID 1666                                                                                                  | cb10921_c1/f1p0/2459    |      |      |      |      |      |      |      |      |
|                                                                                                                       | isoform=cb10921_c1;full_length_coverage=1;non_full_length_coverage=0;isoform_length=2459;expected_accuracy=0.991    |                         | 532  | 1417 | 6    | 533  | 1572 | 2459 | 22   | 552  |



|                         |                                                                                                                                                                           |      |      |      |      |      |      |      |      |
|-------------------------|---------------------------------------------------------------------------------------------------------------------------------------------------------------------------|------|------|------|------|------|------|------|------|
| cb8564_c24781/f1p0/2847 | gnl BL_ORD_ID 13098      cb8564_c160798/f1p0/3317<br>isoform=cb8564_c160798;full_length_coverage=1;non_full_length_coverage=0;isoform_length=3317;expected_accuracy=0.999 | 13   | 2521 | 2518 | 2833 | 1    | 2525 | 2986 | 3302 |
| cb3838_c6/f1p0/3274     | gnl BL_ORD_ID 70647      cb3838_c5/f1p0/4926<br>isoform=cb3838_c6;full_length_coverage=1;non_full_length_coverage=0;isoform_length=3274;expected_accuracy=0.994           | 1026 | 3153 | 1    | 1026 | 1818 | 3947 | 3    | 1026 |
| cb8564_c80694/f1p1/4265 | gnl BL_ORD_ID 3345      cb10480_c36/f1p0/5122<br>isoform=cb10480_c36;full_length_coverage=1;non_full_length_coverage=0;isoform_length=5122;expected_accuracy=0.997        | 158  | 3065 | 3063 | 4156 | 1    | 2903 | 4031 | 5122 |
| cb3087_c5/f3p1/2943     | gnl BL_ORD_ID 37719      cb3087_c29/f1p1/3127<br>isoform=cb3087_c5;full_length_coverage=3;non_full_length_coverage=1;isoform_length=2943;expected_accuracy=1.000          | 1    | 2327 | 2323 | 2943 | 22   | 2348 | 2486 | 3106 |
| cb8564_c66920/f3p3/2894 | gnl BL_ORD_ID 16705      cb8564_c53880/f1p0/3484<br>isoform=cb8564_c53880;full_length_coverage=1;non_full_length_coverage=0;isoform_length=3484;expected_accuracy=0.996   | 1056 | 2863 | 1    | 1057 | 1672 | 3477 | 1    | 1056 |
| cb8564_c15653/f1p4/2475 | gnl BL_ORD_ID 55614      cb8564_c46839/f1p1/2758                                                                                                                          | 1    | 2293 | 2289 | 2430 | 2    | 2295 | 2514 | 2653 |
| cb1523_c12/f1p0/2619    | gnl BL_ORD_ID 63706      cb1523_c8/f1p0/4424<br>isoform=cb1523_c12;full_length_coverage=1;non_full_length_coverage=0;isoform_length=2619;expected_accuracy=0.998          | 1    | 1748 | 1746 | 2619 | 7    | 1749 | 3523 | 4395 |

|                                                                                                                                                |                                                                                                                                                                |     |      |      |      |      |      |      |      |
|------------------------------------------------------------------------------------------------------------------------------------------------|----------------------------------------------------------------------------------------------------------------------------------------------------------------|-----|------|------|------|------|------|------|------|
| cb6763_c0/f6p1/1948<br>isoform=cb6763_c0;full_length_coverage=6;non_full_length_coverage=1;isoform_length=1948;expected_accuracy=0.999         | gnl BL_ORD_ID 5331      cb6763_c3/f1p0/2719<br>isoform=cb6763_c3;full_length_coverage=1;non_full_length_coverage=0;isoform_length=2719;expected_accuracy=0.996 | 600 | 1928 | 64   | 604  | 1393 | 2719 | 2    | 542  |
| cb8564_c75620/f1p0/2781<br>isoform=cb8564_c75620;full_length_coverage=1;non_full_length_coverage=0;isoform_length=2781;expected_accuracy=0.996 | gnl BL_ORD_ID 57373      cb8564_c91193/f1p0/3331                                                                                                               | 15  | 1769 | 1764 | 2781 | 58   | 1812 | 2008 | 3025 |
| cb8564_c43779/f1p0/3021<br>isoform=cb8564_c43779;full_length_coverage=1;non_full_length_coverage=0;isoform_length=3021;expected_accuracy=0.993 | gnl BL_ORD_ID 55894      cb8564_c48160/f1p2/3308                                                                                                               | 2   | 2344 | 2345 | 3021 | 2    | 2364 | 2520 | 3195 |
| cb3774_c34/f1p0/3501<br>isoform=cb3774_c28;full_length_coverage=1;non_full_length_coverage=0;isoform_length=4127;expected_accuracy=0.993       | gnl BL_ORD_ID 39195      cb3774_c28/f1p0/4127                                                                                                                  | 1   | 2947 | 2944 | 3349 | 1    | 2940 | 3722 | 4127 |
| cb4715_c2/f1p0/2552<br>isoform=cb4715_c2;full_length_coverage=1;non_full_length_coverage=0;isoform_length=2552;expected_accuracy=0.992         | gnl BL_ORD_ID 42541      cb4715_c0/f1p0/3277                                                                                                                   | 235 | 2518 | 13   | 238  | 974  | 3277 | 1    | 227  |
| cb6582_c2/f2p0/2371<br>isoform=cb6582_c2;full_length_coverage=2;non_full_length_coverage=0;isoform_length=2371;expected_accuracy=0.996         | gnl BL_ORD_ID 4992      cb6582_c18/f1p0/3412                                                                                                                   | 473 | 2370 | 6    | 475  | 1454 | 3403 | 1    | 479  |
| cb8564_c45300/f1p4/3014<br>isoform=cb8564_c45300;full_length_coverage=1;non_full_length_coverage=0;isoform_length=3014;expected_accuracy=0.996 | gnl BL_ORD_ID 13575      cb8564_c20499/f3p0/3328                                                                                                               | 243 | 3014 | 1    | 246  | 400  | 3174 | 1    | 243  |

|                                                                                                                     |                                                                                                                      |     |      |      |      |     |          |      |          |  |  |
|---------------------------------------------------------------------------------------------------------------------|----------------------------------------------------------------------------------------------------------------------|-----|------|------|------|-----|----------|------|----------|--|--|
| ull_length_coverage=4;isoform_length=3014;expected_accuracy=0.996                                                   | ll_length_coverage=0;isoform_length=3328;expected_accuracy=1.000                                                     |     |      |      |      |     |          |      |          |  |  |
| cb18456_c1748/f1p0/1180                                                                                             | gnl BL_ORD_ID 53550 cb8564_c128527/f1p1/2034                                                                         | 243 | 1188 | 9    | 248  | 976 | 31       | 1350 | 1114     |  |  |
| cb8564_c12805/f1p0/2580                                                                                             |                                                                                                                      |     |      |      |      |     |          |      |          |  |  |
| isoform=cb8564_c12805;full_length_coverage=1;non_full_length_coverage=0;isoform_length=2580;expected_accuracy=0.993 | gnl BL_ORD_ID 52842 cb8564_c15468/f1p0/3015                                                                          | 1   | 1695 | 1690 | 2533 | 36  | 173<br>1 | 1973 | 281<br>9 |  |  |
|                                                                                                                     |                                                                                                                      |     |      |      |      |     |          |      |          |  |  |
| cb8564_c128295/f1p0/2590                                                                                            | gnl BL_ORD_ID 12383 cb8564_c122520/f1p0/2546                                                                         |     |      |      |      |     |          |      |          |  |  |
|                                                                                                                     | isoform=cb8564_c122520;full_length_coverage=1;non_full_length_coverage=0;isoform_length=2546;expected_accuracy=0.998 | 1   | 1703 | 1705 | 2509 | 1   | 170<br>0 | 1591 | 239<br>4 |  |  |
|                                                                                                                     |                                                                                                                      |     |      |      |      |     |          |      |          |  |  |
| cb2208_c33/f1p0/3174                                                                                                | gnl BL_ORD_ID 69621 cb2208_c30/f1p0/3607                                                                             | 19  | 2195 | 2193 | 2861 | 1   | 217<br>8 | 2412 | 307<br>9 |  |  |
|                                                                                                                     |                                                                                                                      |     |      |      |      |     |          |      |          |  |  |
| cb3406_c2/f2p0/1990                                                                                                 | gnl BL_ORD_ID 40557 cb3406_c11/f1p0/2573                                                                             |     |      |      |      |     |          |      |          |  |  |
| isoform=cb3406_c2;full_length_coverage=2;non_full_length_coverage=0;isoform_length=1990;expected_accuracy=1.000     | isoform=cb3406_c11;full_length_coverage=1;non_full_length_coverage=0;isoform_length=2573;expected_accuracy=0.992     | 177 | 1923 | 10   | 177  | 832 | 257<br>3 | 1    | 167      |  |  |
|                                                                                                                     |                                                                                                                      |     |      |      |      |     |          |      |          |  |  |
| cb12703_c1/f1p0/1108                                                                                                | gnl BL_ORD_ID 22232 cb12703_c2/f1p0/1343                                                                             |     |      |      |      |     |          |      |          |  |  |
|                                                                                                                     | isoform=cb12703_c2;full_length_coverage=1;non_full_length_coverage=0;isoform_length=1343;expected_accuracy=0.997     | 9   | 828  | 826  | 1103 | 1   | 820      | 1066 | 134<br>3 |  |  |
|                                                                                                                     |                                                                                                                      |     |      |      |      |     |          |      |          |  |  |
| cb9170_c5/f1p0/1862                                                                                                 | gnl BL_ORD_ID 20766 cb9170_c0/f3p0/1973                                                                              |     |      |      |      |     |          |      |          |  |  |
| isoform=cb9170_c5;full_length_coverage=1;non_full_length_coverage=0;isoform_length=1862;expected_accuracy=1.000     | isoform=cb9170_c0;full_length_coverage=3;non_full_length_coverage=0;isoform_length=1973;expected_accuracy=1.000      | 246 | 1861 | 3    | 246  | 358 | 197<br>3 | 1    | 245      |  |  |
|                                                                                                                     |                                                                                                                      |     |      |      |      |     |          |      |          |  |  |
| cb8564_c40598/f1p4/3119                                                                                             | gnl BL_ORD_ID 14539 cb8564_c46562/f2p3/3196                                                                          | 10  | 2732 | 2729 | 3049 | 16  | 275      | 2876 | 319      |  |  |



|                         |                                                                                                                                                                                         |      |      |      |      |      |          |      |          |
|-------------------------|-----------------------------------------------------------------------------------------------------------------------------------------------------------------------------------------|------|------|------|------|------|----------|------|----------|
| cb8564_c25287/f1p0/2199 | curacy=1.000<br>gnl BL_ORD_ID 16625      cb8564_c72796/f1p0/2508<br>isoform=cb8564_c25287;full_length_coverage=1;non_full_length_coverage=0;isoform_length=2199;expected_accuracy=0.993 | 169  | 2199 | 1    | 170  | 332  | 236<br>6 | 30   | 199      |
| cb5874_c30/f1p0/2210    | gnl BL_ORD_ID 45911      cb5874_c11/f2p1/2975<br>isoform=cb5874_c11;full_length_coverage=2;non_full_length_coverage=1;isoform_length=2975;expected_accuracy=1.000                       | 145  | 2190 | 1    | 145  | 832  | 287<br>7 | 490  | 634      |
| cb8564_c4541/f3p0/2161  | gnl BL_ORD_ID 55032      cb8564_c4537/f1p0/2998<br>isoform=cb8564_c4541;full_length_coverage=3;non_full_length_coverage=0;isoform_length=2161;expected_accuracy=0.992                   | 1    | 1286 | 1284 | 2106 | 48   | 133<br>2 | 2198 | 301<br>9 |
| cb8564_c37866/f1p3/2874 | gnl BL_ORD_ID 14407      cb8564_c44036/f1p0/3258<br>isoform=cb8564_c37866;full_length_coverage=1;non_full_length_coverage=3;isoform_length=2874;expected_accuracy=0.990                 | 1159 | 2863 | 1    | 1159 | 1575 | 325<br>8 | 1    | 1147     |
| cb8564_c40203/f1p0/3161 | gnl BL_ORD_ID 16775      cb8564_c57586/f4p1/3438<br>isoform=cb8564_c57586;full_length_coverage=4;non_full_length_coverage=1;isoform_length=3438;expected_accuracy=1.000                 | 310  | 3144 | 1    | 312  | 604  | 343<br>8 | 1    | 311      |
| cb2482_c50/f1p0/1645    | gnl BL_ORD_ID 37654      cb2482_c40/f1p0/2979<br>isoform=cb2482_c40;full_length_coverage=1;non_full_length_coverage=0;isoform_length=2979;expected_accuracy=0.997                       | 489  | 1649 | 75   | 494  | 1816 | 297<br>6 | 1    | 420      |
| cb8564_c82644/f1p0/3097 | gnl BL_ORD_ID 57755      cb8564_c79781/f1p0/5222                                                                                                                                        | 1    | 2465 | 2464 | 3001 | 2    | 246      | 4457 | 499      |

|                                                                                                                                                  |                                                                                                                                                                      |     |      |      |      |     |     |      |     |
|--------------------------------------------------------------------------------------------------------------------------------------------------|----------------------------------------------------------------------------------------------------------------------------------------------------------------------|-----|------|------|------|-----|-----|------|-----|
|                                                                                                                                                  |                                                                                                                                                                      |     |      |      |      |     |     | 6    | 3   |
| cb8564_c14636/f1p0/2373                                                                                                                          | gnl BL_ORD_ID 58187 cb8564_c91049/f1p0/3717                                                                                                                          | 1   | 1719 | 1715 | 2405 | 408 | 212 | 2942 | 363 |
|                                                                                                                                                  |                                                                                                                                                                      |     |      |      |      |     | 7   |      | 3   |
| cb18301_c37/f1p0/1280                                                                                                                            | gnl BL_ORD_ID 12295 cb8564_c123425/f1p0/2833<br>isoform=cb8564_c123425;full_length_coverage=1;non_full_length_coverage=0;isoform_length=2833;expected_accuracy=0.994 | 1   | 1020 | 1019 | 1282 | 63  | 108 | 1204 | 146 |
|                                                                                                                                                  |                                                                                                                                                                      |     |      |      |      |     | 3   |      | 7   |
| cb8564_c186356/f1p0/2744<br>isoform=cb8564_c186356;full_length_coverage=1;non_full_length_coverage=0;isoform_length=2744;expected_accuracy=0.998 | gnl BL_ORD_ID 15154 cb8564_c32509/f1p1/2880<br>isoform=cb8564_c32509;full_length_coverage=1;non_full_length_coverage=1;isoform_length=2880;expected_accuracy=0.991   | 11  | 1396 | 1393 | 2722 | 2   | 141 | 1531 | 287 |
|                                                                                                                                                  |                                                                                                                                                                      |     |      |      |      |     | 0   |      | 7   |
| cb8564_c15653/f1p4/2475                                                                                                                          | gnl BL_ORD_ID 52809 cb8564_c14548/f1p0/3030                                                                                                                          | 22  | 2291 | 2289 | 2435 | 44  | 231 | 2511 | 265 |
|                                                                                                                                                  |                                                                                                                                                                      |     |      |      |      |     | 3   |      | 7   |
| cb8564_c20840/f1p3/2713<br>isoform=cb8564_c20840;full_length_coverage=1;non_full_length_coverage=3;isoform_length=2713;expected_accuracy=0.999   | gnl BL_ORD_ID 14290 cb8564_c24078/f1p1/3014<br>isoform=cb8564_c24078;full_length_coverage=1;non_full_length_coverage=1;isoform_length=3014;expected_accuracy=0.993   | 315 | 2683 | 47   | 316  | 629 | 301 | 75   | 346 |
|                                                                                                                                                  |                                                                                                                                                                      |     |      |      |      |     | 4   |      |     |
| cb8564_c84198/f1p0/2418                                                                                                                          | gnl BL_ORD_ID 56786 cb8564_c71725/f1p0/3227                                                                                                                          | 1   | 2008 | 2006 | 2428 | 63  | 207 | 2190 | 261 |
|                                                                                                                                                  |                                                                                                                                                                      |     |      |      |      |     | 3   |      | 2   |
| cb2033_c16/f1p0/2147<br>isoform=cb2033_c16;full_length_coverage=1;non_full_length_coverage=0;isoform_length=2147;expected_accuracy=0.994         | gnl BL_ORD_ID 34871 cb2033_c13/f1p0/2928<br>isoform=cb2033_c13;full_length_coverage=1;non_full_length_coverage=0;isoform_length=2928;expected_accuracy=0.994         | 1   | 1872 | 1868 | 2147 | 694 | 254 | 2648 | 292 |
|                                                                                                                                                  |                                                                                                                                                                      |     |      |      |      |     | 1   |      | 4   |
| cb7560_c35/f1p1/2004<br>isoform=cb7560_c35;full_length_coverage=1;non_full_length_coverage=1;isoform_length=2004;expected_accuracy=0.994         | gnl BL_ORD_ID 8570 cb7560_c40/f1p1/2225<br>isoform=cb7560_c40;full_length_coverage=1;non_full_length_coverage=1;isoform_length=2225;expected_accuracy=0.994          | 1   | 1446 | 1444 | 1969 | 2   | 145 | 1698 | 222 |
|                                                                                                                                                  |                                                                                                                                                                      |     |      |      |      |     | 0   |      | 5   |

|                                                                                                                                                        |                                                                                                                                                                                         |     |      |      |      |      |          |      |          |
|--------------------------------------------------------------------------------------------------------------------------------------------------------|-----------------------------------------------------------------------------------------------------------------------------------------------------------------------------------------|-----|------|------|------|------|----------|------|----------|
| racy=0.994<br>cb9718_c43/f1p0/1655<br>isoform=cb9718_c43;full_length_coverage=1;non_full_length_coverage=0;isoform_length=1655;expected_accuracy=0.996 | acy=0.995<br>gnl BL_ORD_ID 58858 cb9718_c26/f1p0/2005                                                                                                                                   | 288 | 1655 | 8    | 290  | 451  | 181<br>8 | 69   | 351      |
| cb9157_c9/f1p0/1707<br>isoform=cb9157_c9;full_length_coverage=1;non_full_length_coverage=0;isoform_length=1707;expected_accuracy=0.996                 | gnl BL_ORD_ID 21708                      cb9157_c5/f1p0/2086<br>isoform=cb9157_c5;full_length_coverage=1;non_full_length_coverage=0;isoform_length=2086;expected_accuracy=0.993         | 1   | 1330 | 1327 | 1707 | 184  | 150<br>9 | 1651 | 203<br>1 |
| cb8564_c70577/f1p0/3111                                                                                                                                | gnl BL_ORD_ID 18906                      cb8564_c90449/f1p3/3223<br>isoform=cb8564_c90449;full_length_coverage=1;non_full_length_coverage=3;isoform_length=3223;expected_accuracy=0.996 | 262 | 2845 | 1    | 263  | 640  | 322<br>3 | 36   | 296      |
| cb8564_c114729/f1p1/2091<br>isoform=cb8564_c114729;full_length_coverage=1;non_full_length_coverage=1;isoform_length=2091;expected_accuracy=0.994       | gnl BL_ORD_ID 54773 cb8564_c2528/f1p0/3357                                                                                                                                              | 1   | 1609 | 1608 | 2067 | 32   | 164<br>4 | 2766 | 322<br>9 |
| cb7263_c45/f1p0/1490<br>isoform=cb7263_c45;full_length_coverage=1;non_full_length_coverage=0;isoform_length=1490;expected_accuracy=0.999               | gnl BL_ORD_ID 8081                      cb7263_c14/f3p0/2616<br>isoform=cb7263_c14;full_length_coverage=3;non_full_length_coverage=0;isoform_length=2616;expected_accuracy=1.000        | 1   | 1021 | 1020 | 1490 | 41   | 106<br>1 | 2131 | 260<br>1 |
| cb4649_c2/f1p0/2183<br>isoform=cb4649_c2;full_length_coverage=1;non_full_length_coverage=0;isoform_length=2183;expected_accuracy=0.997                 | gnl BL_ORD_ID 72809 cb4649_c0/f1p0/3217                                                                                                                                                 | 108 | 2136 | 1    | 108  | 1155 | 318<br>5 | 1    | 109      |
| cb5999_c8/f1p0/2429                                                                                                                                    | gnl BL_ORD_ID 74748 cb5999_c6/f1p0/2868                                                                                                                                                 | 1   | 1268 | 1266 | 2427 | 108  | 136      | 1697 | 285      |

|                                                                                                                   |                                                                                                                  |                         |     |      |      |      |      |      |      |      |
|-------------------------------------------------------------------------------------------------------------------|------------------------------------------------------------------------------------------------------------------|-------------------------|-----|------|------|------|------|------|------|------|
| isoform=cb5999_c8;full_length_coverage=1;non_full_length_coverage=0;isoform_length=2429;expected_accuracy=0.996   |                                                                                                                  |                         |     |      |      |      |      | 9    |      | 3    |
| cb9096_c5/f1p0/2190                                                                                               | gnl BL_ORD_ID 20794                                                                                              | cb9096_c2/f1p0/3368     |     |      |      |      |      |      |      |      |
| isoform=cb9096_c5;full_length_coverage=1;non_full_length_coverage=0;isoform_length=2190;expected_accuracy=0.995   | isoform=cb9096_c2;full_length_coverage=1;non_full_length_coverage=0;isoform_length=3368;expected_accuracy=0.996  |                         | 482 | 2190 | 94   | 481  | 1659 | 3364 | 1    | 388  |
| cb8564_c37361/f1p0/3076                                                                                           | gnl BL_ORD_ID 55437                                                                                              | cb8564_c41690/f1p1/3409 | 1   | 2481 | 2477 | 3070 | 1    | 2486 | 2587 | 3180 |
| cb8564_c36731/f1p2/2761                                                                                           | gnl BL_ORD_ID 55910                                                                                              | cb8564_c48645/f1p1/3287 | 11  | 1977 | 1972 | 2673 | 17   | 1982 | 2411 | 3113 |
| cb10088_c29/f1p0/1009                                                                                             | gnl BL_ORD_ID 25465                                                                                              | cb13559_c0/f2p2/1276    |     |      |      |      |      |      |      |      |
| isoform=cb10088_c29;full_length_coverage=1;non_full_length_coverage=0;isoform_length=1009;expected_accuracy=1.000 | isoform=cb13559_c0;full_length_coverage=2;non_full_length_coverage=2;isoform_length=1276;expected_accuracy=0.997 |                         | 442 | 1009 | 5    | 447  | 583  | 1151 | 1    | 444  |
| cb6271_c9/f1p0/1555                                                                                               | gnl BL_ORD_ID 49574                                                                                              | cb6271_c5/f1p0/2238     | 1   | 1364 | 1359 | 1500 | 19   | 1383 | 2037 | 2179 |
| isoform=cb6271_c9;full_length_coverage=1;non_full_length_coverage=0;isoform_length=1555;expected_accuracy=1.000   |                                                                                                                  |                         |     |      |      |      |      |      |      |      |
| cb13202_c19/f1p0/1573                                                                                             | gnl BL_ORD_ID 25400                                                                                              | cb13202_c0/f5p1/1343    |     |      |      |      |      |      |      |      |
| isoform=cb13202_c0;full_length_coverage=5;non_full_length_coverage=1;isoform_length=1343;expected_accuracy=0.999  |                                                                                                                  |                         | 344 | 1229 | 53   | 345  | 396  | 1281 | 1    | 293  |
| cb14709_c16/f1p0/1225                                                                                             | gnl BL_ORD_ID 27948                                                                                              | cb14709_c7/f2p0/1443    |     |      |      |      |      |      |      |      |
| isoform=cb14709_c16;full_length_coverage=1;non_full_length_coverage=0;isoform_length=1225;expected_accuracy=1.000 | isoform=cb14709_c7;full_length_coverage=2;non_full_length_coverage=0;isoform_length=1443;expected_accuracy=1.000 |                         | 1   | 1023 | 1019 | 1225 | 19   | 1045 | 1235 | 1443 |



|                                                                                                                     |                                                                                                                  |      |      |      |      |      |          |      |          |  |
|---------------------------------------------------------------------------------------------------------------------|------------------------------------------------------------------------------------------------------------------|------|------|------|------|------|----------|------|----------|--|
| uracy=0.992                                                                                                         | acy=0.999                                                                                                        |      |      |      |      |      |          |      |          |  |
| cb5091_c4/f1p0/3004                                                                                                 | gnl BL_ORD_ID 73253 cb5091_c2/f1p0/3066                                                                          | 203  | 2960 | 2    | 205  | 318  | 307<br>4 | 1    | 204      |  |
| cb8564_c44698/f1p5/2843                                                                                             |                                                                                                                  |      |      |      |      |      |          |      |          |  |
| isoform=cb8564_c44698;full_length_coverage=1;non_full_length_coverage=5;isoform_length=2843;expected_accuracy=0.997 | gnl BL_ORD_ID 55317 cb8564_c38251/f1p0/3243                                                                      | 1    | 2516 | 2511 | 2829 | 1    | 253<br>2 | 2653 | 297<br>3 |  |
| cb8564_c126213/f1p0/1904                                                                                            | gnl BL_ORD_ID 52103 cb8564_c110975/f1p0/2133                                                                     | 1    | 1585 | 1586 | 1766 | 58   | 164<br>2 | 1833 | 201<br>3 |  |
| cb6071_c14/f1p2/5103                                                                                                | gnl BL_ORD_ID 45342 cb6071_c10/f1p1/6435                                                                         |      |      |      |      |      |          |      |          |  |
| isoform=cb6071_c14;full_length_coverage=1;non_full_length_coverage=2;isoform_length=5103;expected_accuracy=0.997    | isoform=cb6071_c10;full_length_coverage=1;non_full_length_coverage=1;isoform_length=6435;expected_accuracy=0.997 | 305  | 5048 | 108  | 304  | 1692 | 643<br>5 | 1329 | 152<br>5 |  |
| cb7214_c11/f1p0/1870                                                                                                | gnl BL_ORD_ID 8880 cb7214_c4/f1p0/2395                                                                           |      |      |      |      |      |          |      |          |  |
| isoform=cb7214_c4;full_length_coverage=1;non_full_length_coverage=0;isoform_length=2395;expected_accuracy=0.999     | isoform=cb7214_c4;full_length_coverage=1;non_full_length_coverage=0;isoform_length=2395;expected_accuracy=0.999  | 174  | 1841 | 1    | 173  | 647  | 231<br>4 | 28   | 200      |  |
| cb2305_c7/f1p0/2918                                                                                                 | gnl BL_ORD_ID 36688 cb2305_c9/f1p0/3279                                                                          |      |      |      |      |      |          |      |          |  |
| isoform=cb2305_c7;full_length_coverage=1;non_full_length_coverage=0;isoform_length=2918;expected_accuracy=0.993     | isoform=cb2305_c9;full_length_coverage=1;non_full_length_coverage=0;isoform_length=3279;expected_accuracy=0.994  | 1351 | 2902 | 1    | 1352 | 1732 | 327<br>9 | 198  | 154<br>3 |  |
| cb2737_c37/f1p0/2894                                                                                                | gnl BL_ORD_ID 36735 cb2737_c13/f1p0/3105                                                                         |      |      |      |      |      |          |      |          |  |
| isoform=cb2737_c13;full_length_coverage=1;non_full_length_coverage=0;isoform_length=3105;expected_accuracy=0.995    | isoform=cb2737_c13;full_length_coverage=1;non_full_length_coverage=0;isoform_length=3105;expected_accuracy=0.995 | 1    | 1495 | 1493 | 2791 | 186  | 167<br>6 | 1808 | 310<br>5 |  |
| cb18230_c0/f1p0/1725                                                                                                | gnl BL_ORD_ID 63865 cb1683_c28/f1p0/3914                                                                         | 547  | 1725 | 58   | 548  | 2769 | 394      | 1727 | 222      |  |

|                                                                                                                     |                                                                                                                      |                          |      |      |      |      |      |     |      |     |
|---------------------------------------------------------------------------------------------------------------------|----------------------------------------------------------------------------------------------------------------------|--------------------------|------|------|------|------|------|-----|------|-----|
| isoform=cb18230_c0;full_length_coverage=1;non_full_length_coverage=0;isoform_length=1725;expected_accuracy=0.992    |                                                                                                                      |                          |      |      |      |      |      | 9   |      | 0   |
| cb8564_c1159/f1p1/2210                                                                                              |                                                                                                                      |                          |      |      |      |      |      |     |      |     |
| isoform=cb8564_c1159;full_length_coverage=1;non_full_length_coverage=1;isoform_length=2210;expected_accuracy=0.993  | gnl BL_ORD_ID 52627                                                                                                  | cb8564_c1184/f1p0/2806   | 1004 | 2170 | 1    | 1005 | 1307 | 249 | 2    | 100 |
| cb6318_c23/f1p1/2399                                                                                                | gnl BL_ORD_ID 4833                                                                                                   | cb6318_c33/f7p2/2637     |      |      |      |      |      |     |      |     |
| isoform=cb6318_c23;full_length_coverage=1;non_full_length_coverage=1;isoform_length=2399;expected_accuracy=0.991    | isoform=cb6318_c33;full_length_coverage=7;non_full_length_coverage=2;isoform_length=2637;expected_accuracy=1.000     |                          | 1    | 1848 | 1844 | 2399 | 31   | 187 | 2022 | 257 |
| cb3324_c11/f1p0/5586                                                                                                | gnl BL_ORD_ID 71091                                                                                                  | cb3324_c7/f1p2/6368      | 2212 | 5502 | 1    | 2214 | 3083 | 637 | 143  | 235 |
|                                                                                                                     |                                                                                                                      |                          |      |      |      |      |      | 3   |      | 6   |
| cb6471_c23/f1p0/2688                                                                                                | gnl BL_ORD_ID 5494                                                                                                   | cb6471_c7/f2p0/2927      |      |      |      |      |      |     |      |     |
|                                                                                                                     | isoform=cb6471_c7;full_length_coverage=2;non_full_length_coverage=0;isoform_length=2927;expected_accuracy=0.997      |                          | 10   | 1927 | 1928 | 2663 | 1    | 191 | 2074 | 280 |
|                                                                                                                     |                                                                                                                      |                          |      |      |      |      |      | 2   |      | 9   |
| cb8564_c38947/f1p0/2650                                                                                             | gnl BL_ORD_ID 13054                                                                                                  | cb8564_c181182/f1p0/2830 |      |      |      |      |      |     |      |     |
| isoform=cb8564_c38947;full_length_coverage=1;non_full_length_coverage=0;isoform_length=2650;expected_accuracy=0.996 | isoform=cb8564_c181182;full_length_coverage=1;non_full_length_coverage=0;isoform_length=2830;expected_accuracy=0.998 |                          | 1    | 1441 | 1436 | 2650 | 1    | 143 | 1617 | 283 |
|                                                                                                                     |                                                                                                                      |                          |      |      |      |      |      | 7   |      | 0   |
| cb8564_c74445/f1p1/2816                                                                                             |                                                                                                                      |                          |      |      |      |      |      |     |      |     |
| isoform=cb8564_c74445;full_length_coverage=1;non_full_length_coverage=1;isoform_length=2816;expected_accuracy=0.992 | gnl BL_ORD_ID 54719                                                                                                  | cb8564_c159487/f1p6/3403 | 1332 | 2816 | 11   | 1334 | 1778 | 326 | 1    | 132 |
|                                                                                                                     |                                                                                                                      |                          |      |      |      |      |      | 2   |      | 6   |
| cb8564_c39136/f1p0/3036                                                                                             | gnl BL_ORD_ID 55502                                                                                                  | cb8564_c43538/f1p0/3563  | 1    | 2089 | 2085 | 3036 | 2    | 210 | 2228 | 318 |

|                                                                                                                     |                                                                                                                     |                         |     |      |      |      |     |      |           |
|---------------------------------------------------------------------------------------------------------------------|---------------------------------------------------------------------------------------------------------------------|-------------------------|-----|------|------|------|-----|------|-----------|
| isoform=cb8564_c39136;full_length_coverage=1;non_full_length_coverage=0;isoform_length=3036;expected_accuracy=0.998 |                                                                                                                     |                         |     |      |      |      |     | 1    | 0         |
| cb4016_c19/f1p0/2644                                                                                                | gnl BL_ORD_ID 39535                                                                                                 | cb4016_c27/f1p1/3204    |     |      |      |      |     |      |           |
| isoform=cb4016_c19;full_length_coverage=1;non_full_length_coverage=0;isoform_length=2644;expected_accuracy=0.995    | isoform=cb4016_c27;full_length_coverage=1;non_full_length_coverage=1;isoform_length=3204;expected_accuracy=0.996    |                         | 284 | 2644 | 5    | 283  | 792 | 3148 | 3 277     |
| cb8564_c53806/f1p3/3974                                                                                             | gnl BL_ORD_ID 16628                                                                                                 | cb8564_c47737/f7p5/4351 |     |      |      |      |     |      |           |
| isoform=cb8564_c53806;full_length_coverage=1;non_full_length_coverage=3;isoform_length=3974;expected_accuracy=0.990 | isoform=cb8564_c47737;full_length_coverage=7;non_full_length_coverage=5;isoform_length=4351;expected_accuracy=0.998 |                         | 172 | 3974 | 1    | 173  | 395 | 4179 | 15 178    |
| cb2177_c32/f1p0/2567                                                                                                | gnl BL_ORD_ID 34831                                                                                                 | cb2177_c34/f1p1/2802    |     |      |      |      |     |      |           |
| isoform=cb2177_c32;full_length_coverage=1;non_full_length_coverage=0;isoform_length=2567;expected_accuracy=0.990    | isoform=cb2177_c34;full_length_coverage=1;non_full_length_coverage=1;isoform_length=2802;expected_accuracy=0.994    |                         | 1   | 1568 | 1567 | 2546 | 16  | 1601 | 1776 2759 |
| cb10563_c2/f1p0/1592                                                                                                | gnl BL_ORD_ID 2785                                                                                                  | cb10563_c1/f1p0/2871    |     |      |      |      |     |      |           |
|                                                                                                                     | isoform=cb10563_c1;full_length_coverage=1;non_full_length_coverage=0;isoform_length=2871;expected_accuracy=0.995    |                         | 1   | 1018 | 1018 | 1597 | 1   | 1017 | 2291 2870 |
| cb8564_c50697/f1p3/2172                                                                                             |                                                                                                                     |                         |     |      |      |      |     |      |           |
| isoform=cb8564_c50697;full_length_coverage=1;non_full_length_coverage=3;isoform_length=2172;expected_accuracy=0.993 | gnl BL_ORD_ID 58020                                                                                                 | cb8564_c86752/f1p1/3346 | 106 | 2167 | 1    | 108  | 739 | 2800 | 15 122    |
| cb6271_c9/f1p0/1555                                                                                                 | gnl BL_ORD_ID 4495                                                                                                  | cb6271_c7/f1p0/2266     |     |      |      |      |     |      |           |
| isoform=cb6271_c9;full_length_coverage=1;non_full_length_coverage=0;isoform_length=1555;expected_accuracy=0.993     | isoform=cb6271_c7;full_length_coverage=1;non_full_length_coverage=0;isoform_length=2266;expected_accuracy=0.993     |                         | 1   | 1362 | 1359 | 1555 | 64  | 1425 | 2082 2266 |

|                                                                                                                                                     |                                                                                                                                                                                             |     |      |      |      |      |      |      |      |
|-----------------------------------------------------------------------------------------------------------------------------------------------------|---------------------------------------------------------------------------------------------------------------------------------------------------------------------------------------------|-----|------|------|------|------|------|------|------|
| acy=1.000<br>cb4260_c2/f2p2/2188<br>isoform=cb4260_c2;full_length_coverage=2;non_full_length_coverage=2;isoform_length=2188;expected_accuracy=0.997 | cy=0.996<br>gnl BL_ORD_ID 42573                      cb4260_c1/f1p0/3391<br>isoform=cb4260_c1;full_length_coverage=1;non_full_length_coverage=0;isoform_length=3391;expected_accuracy=0.994 | 1   | 1295 | 1292 | 2115 | 63   | 1356 | 2569 | 3391 |
| cb15918_c2/f3p0/1168<br>isoform=cb15918_c2;full_length_coverage=3;non_full_length_coverage=0;isoform_length=1168;expected_accuracy=1.000            | gnl BL_ORD_ID 64973   cb15918_c10/f1p0/1603                                                                                                                                                 | 499 | 1164 | 53   | 504  | 1087 | 1751 | 7    | 458  |
| cb1262_c30/f1p0/3820<br>isoform=cb1262_c30;full_length_coverage=1;non_full_length_coverage=0;isoform_length=3820;expected_accuracy=0.995            | gnl BL_ORD_ID 23602                      cb1262_c27/f1p1/4094<br>isoform=cb1262_c27;full_length_coverage=1;non_full_length_coverage=1;isoform_length=4094;expected_accuracy=0.996           | 235 | 3820 | 20   | 236  | 529  | 4091 | 1    | 224  |
| cb8564_c47011/f1p0/3100                                                                                                                             | gnl BL_ORD_ID 58037   cb8564_c87188/f1p1/3426                                                                                                                                               | 23  | 2306 | 2301 | 2934 | 127  | 2403 | 2641 | 3274 |
| cb8564_c92358/f1p0/3797<br>isoform=cb8564_c92358;full_length_coverage=1;non_full_length_coverage=0;isoform_length=3797;expected_accuracy=0.995      | gnl BL_ORD_ID 10455                      cb8564_c107877/f2p1/3829<br>isoform=cb8564_c107877;full_length_coverage=2;non_full_length_coverage=1;isoform_length=3829;expected_accuracy=1.000   | 155 | 2855 | 2854 | 3797 | 1    | 2703 | 2868 | 3812 |
| cb500_c17/f1p0/2323<br>isoform=cb500_c17;full_length_coverage=1;non_full_length_coverage=0;isoform_length=2323;expected_accuracy=0.997              | gnl BL_ORD_ID 72251   cb500_c68/f1p0/4152                                                                                                                                                   | 1   | 1293 | 1288 | 2323 | 1577 | 2869 | 3001 | 4036 |
| cb7085_c25/f9p1/1910<br>isoform=cb7085_c25;full_length_coverage=9;non_full_length_coverage=1;isoform_length=1910;expected_accuracy=0.997            | gnl BL_ORD_ID 4154                      cb7085_c8/f1p0/2701<br>isoform=cb7085_c8;full_length_coverage=1;non_full_length_coverage=0;isoform_length=2701;expected_accuracy=0.994              | 564 | 1910 | 77   | 566  | 1349 | 2695 | 1    | 483  |

|                                                                                                                                                      |                                                                                                                                                              |     |      |      |      |      |          |      |          |
|------------------------------------------------------------------------------------------------------------------------------------------------------|--------------------------------------------------------------------------------------------------------------------------------------------------------------|-----|------|------|------|------|----------|------|----------|
| racy=1.000<br>cb3888_c8/f1p0/2800<br>isoform=cb3888_c8;full_length_coverage=1;non_full_length_coverage=0;isoform_length=2800;expected_accuracy=0.996 | cy=0.996<br>gnl BL_ORD_ID 71602 cb3888_c2/f1p0/3488                                                                                                          | 243 | 2800 | 18   | 244  | 460  | 301<br>9 | 1    | 228      |
| cb4532_c7/f1p0/1761<br>isoform=cb4532_c5;full_length_coverage=1;non_full_length_coverage=1;isoform_length=2905;expected_accuracy=0.996               | gnl BL_ORD_ID 43745 cb4532_c5/f1p1/2905                                                                                                                      | 260 | 1578 | 40   | 261  | 1581 | 290<br>4 | 1    | 227      |
| cb2737_c35/f1p0/2780<br>isoform=cb2737_c35;full_length_coverage=1;non_full_length_coverage=0;isoform_length=2780;expected_accuracy=0.993             | gnl BL_ORD_ID 36571 cb2737_c54/f1p0/3029<br>isoform=cb2737_c54;full_length_coverage=1;non_full_length_coverage=0;isoform_length=3029;expected_accuracy=0.995 | 126 | 1913 | 1914 | 2780 | 216  | 199<br>8 | 2110 | 297<br>5 |
| cb8564_c186243/f1p0/2948<br>isoform=cb8564_c186243;full_length_coverage=1;non_full_length_coverage=0;isoform_length=2948;expected_accuracy=0.995     | gnl BL_ORD_ID 57332 cb8564_c90231/f1p1/3635                                                                                                                  | 1   | 1986 | 1981 | 2948 | 1    | 199<br>0 | 2154 | 312<br>2 |
| cb7007_c6/f1p0/2251<br>isoform=cb7007_c6;full_length_coverage=1;non_full_length_coverage=0;isoform_length=2251;expected_accuracy=0.997               | gnl BL_ORD_ID 47801 cb7007_c13/f1p0/2402                                                                                                                     | 261 | 2251 | 94   | 264  | 399  | 238<br>9 | 1    | 171      |
| cb1875_c5/f1p1/3559<br>isoform=cb1875_c5;full_length_coverage=1;non_full_length_coverage=1;isoform_length=3559;expected_accuracy=0.996               | gnl BL_ORD_ID 68211 cb1875_c7/f1p0/4579                                                                                                                      | 1   | 1781 | 1780 | 3457 | 120  | 190<br>6 | 2751 | 442<br>5 |
| cb8564_c43399/f1p0/2654                                                                                                                              | gnl BL_ORD_ID 55391 cb8564_c40278/f3p2/3083                                                                                                                  | 1   | 2367 | 2363 | 2654 | 1    | 236      | 2580 | 287      |

|                                                                                                                     |                                                                                                                                                                         |      |      |      |      |      |      |      |      |
|---------------------------------------------------------------------------------------------------------------------|-------------------------------------------------------------------------------------------------------------------------------------------------------------------------|------|------|------|------|------|------|------|------|
| isoform=cb8564_c43399;full_length_coverage=1;non_full_length_coverage=0;isoform_length=2654;expected_accuracy=0.999 |                                                                                                                                                                         |      |      |      |      |      |      | 4    | 1    |
| cb8564_c46939/f1p1/2926                                                                                             | gnl BL_ORD_ID 16622      cb8564_c50151/f1p0/3198<br>isoform=cb8564_c50151;full_length_coverage=1;non_full_length_coverage=0;isoform_length=3198;expected_accuracy=0.995 | 1    | 2134 | 2130 | 2870 | 6    | 2168 | 2273 | 3014 |
| cb2177_c91/f1p0/3417                                                                                                | gnl BL_ORD_ID 66793      cb2177_c69/f1p0/4458                                                                                                                           | 2    | 2400 | 2397 | 3187 | 52   | 2444 | 3650 | 4441 |
| cb8564_c17077/f2p1/4019                                                                                             | gnl BL_ORD_ID 56594      cb8564_c47777/f1p0/4391                                                                                                                        | 385  | 4019 | 179  | 386  | 476  | 4118 | 8    | 215  |
| isoform=cb8564_c17077;full_length_coverage=2;non_full_length_coverage=1;isoform_length=4019;expected_accuracy=0.999 |                                                                                                                                                                         |      |      |      |      |      |      |      |      |
| cb10989_c11/f1p0/3363                                                                                               | gnl BL_ORD_ID 1784      cb10989_c8/f1p0/3471<br>isoform=cb10989_c11;full_length_coverage=1;non_full_length_coverage=0;isoform_length=3363;expected_accuracy=0.995       | 1472 | 3305 | 1    | 1475 | 1638 | 3471 | 3    | 1480 |
| cb5357_c1/f3p0/2536                                                                                                 | gnl BL_ORD_ID 73816      cb5357_c2/f1p0/3122                                                                                                                            | 158  | 2536 | 1    | 161  | 723  | 3094 | 25   | 190  |
| isoform=cb5357_c1;full_length_coverage=3;non_full_length_coverage=0;isoform_length=2536;expected_accuracy=0.996     |                                                                                                                                                                         |      |      |      |      |      |      |      |      |
| cb8564_c47011/f1p0/3100                                                                                             | gnl BL_ORD_ID 17429      cb8564_c85447/f1p0/3196<br>isoform=cb8564_c85447;full_length_coverage=1;non_full_length_coverage=0;isoform_length=3196;expected_accuracy=0.997 | 2    | 2306 | 2301 | 2934 | 2    | 2297 | 2557 | 3188 |
| cb17_c17/f1p0/4756                                                                                                  | gnl BL_ORD_ID 33351      cb17_c14/f1p0/4869                                                                                                                             | 363  | 4671 | 207  | 363  | 458  | 476  | 1    | 157  |

|                          |                                                                                                                                                                          |     |      |      |      |     |      |      |      |  |  |
|--------------------------|--------------------------------------------------------------------------------------------------------------------------------------------------------------------------|-----|------|------|------|-----|------|------|------|--|--|
|                          | isoform=cb17_c14;full_length_coverage=1;non_full_length_coverage=0;isoform_length=4869;expected_accuracy=0.997                                                           |     |      |      |      |     |      |      | 4    |  |  |
| cb8564_c46939/f1p1/2926  | gnl BL_ORD_ID 17429      cb8564_c85447/f1p0/3196<br>isoform=cb8564_c85447;full_length_coverage=1;non_full_length_coverage=0;isoform_length=3196;expected_accuracy=0.997  | 1   | 2134 | 2130 | 2870 | 3   | 2143 | 2248 | 3010 |  |  |
| cb8564_c14344/f1p0/2533  | gnl BL_ORD_ID 13439      cb8564_c22195/f4p0/2939<br>isoform=cb8564_c14344;full_length_coverage=1;non_full_length_coverage=0;isoform_length=2533;expected_accuracy=0.993  | 148 | 2533 | 1    | 151  | 537 | 2923 | 1    | 151  |  |  |
| cb8564_c185920/f1p0/2777 | gnl BL_ORD_ID 15315      cb8564_c39014/f1p0/3019<br>isoform=cb8564_c185920;full_length_coverage=1;non_full_length_coverage=0;isoform_length=2777;expected_accuracy=0.996 | 176 | 2773 | 1    | 177  | 348 | 3013 | 14   | 185  |  |  |
| cb8564_c19466/f3p0/4669  | gnl BL_ORD_ID 36034      cb18797_c1/f1p0/5240<br>isoform=cb8564_c19466;full_length_coverage=3;non_full_length_coverage=0;isoform_length=4669;expected_accuracy=0.995     | 1   | 3819 | 3818 | 4669 | 1   | 3825 | 4045 | 4898 |  |  |
| cb5643_c112/f1p0/1970    | gnl BL_ORD_ID 74229      cb5643_c113/f1p0/2786<br>isoform=cb5643_c112;full_length_coverage=1;non_full_length_coverage=0;isoform_length=1970;expected_accuracy=0.992      | 1   | 1433 | 1434 | 1970 | 137 | 1558 | 1954 | 2484 |  |  |
| cb8564_c54233/f1p1/3194  | gnl BL_ORD_ID 55195      cb8564_c35170/f1p0/3386<br>isoform=cb8564_c54233;full_length_coverage=1;non_full_length_coverage=1;isoform_length=3194;expected_                | 527 | 3187 | 8    | 526  | 738 | 3399 | 2    | 497  |  |  |

|                                                                                                                                                                    |                                                                                                                                                                         |     |      |      |      |     |      |      |      |
|--------------------------------------------------------------------------------------------------------------------------------------------------------------------|-------------------------------------------------------------------------------------------------------------------------------------------------------------------------|-----|------|------|------|-----|------|------|------|
| accuracy=0.995<br>cb8564_c186356/f1p0/2744<br>isoform=cb8564_c186356;full_length_coverage=1;non_full_length_coverage=0;isoform_length=2744;expected_accuracy=0.998 | gnl BL_ORD_ID 17161      cb8564_c87466/f1p1/3006<br>isoform=cb8564_c87466;full_length_coverage=1;non_full_length_coverage=1;isoform_length=3006;expected_accuracy=0.994 | 1   | 1396 | 1393 | 2744 | 1   | 1409 | 1530 | 2897 |
| cb4674_c10/f2p0/2688<br>isoform=cb4674_c10;full_length_coverage=2;non_full_length_coverage=0;isoform_length=2688;expected_accuracy=1.000                           | gnl BL_ORD_ID 42124      cb4674_c68/f1p0/2827<br>isoform=cb4674_c68;full_length_coverage=1;non_full_length_coverage=0;isoform_length=2827;expected_accuracy=0.997       | 18  | 2047 | 2047 | 2688 | 1   | 2025 | 2178 | 2819 |
| cb8564_c36689/f1p1/2368<br>isoform=cb8564_c36689;full_length_coverage=1;non_full_length_coverage=1;isoform_length=2368;expected_accuracy=0.991                     | gnl BL_ORD_ID 15154      cb8564_c32509/f1p1/2880<br>isoform=cb8564_c32509;full_length_coverage=1;non_full_length_coverage=1;isoform_length=2880;expected_accuracy=0.991 | 11  | 1709 | 1706 | 2346 | 2   | 1720 | 2230 | 2877 |
| cb4702_c18/f1p0/2684                                                                                                                                               | gnl BL_ORD_ID 43527      cb4702_c30/f6p2/2783<br>isoform=cb4702_c30;full_length_coverage=6;non_full_length_coverage=2;isoform_length=2783;expected_accuracy=0.999       | 14  | 2200 | 2195 | 2645 | 15  | 2201 | 2309 | 2760 |
| cb653_c9/f1p0/4025<br>isoform=cb653_c9;full_length_coverage=1;non_full_length_coverage=0;isoform_length=4025;expected_accuracy=0.997                               | gnl BL_ORD_ID 5131      cb653_c8/f1p1/4297<br>isoform=cb653_c8;full_length_coverage=1;non_full_length_coverage=1;isoform_length=4297;expected_accuracy=0.999            | 301 | 4020 | 1    | 301  | 580 | 4297 | 6    | 306  |
| cb18456_c5612/f1p0/1308                                                                                                                                            | gnl BL_ORD_ID 67493      cb18456_c4264/f1p1/1767                                                                                                                        | 253 | 1216 | 3    | 258  | 803 | 1765 | 4    | 247  |
| cb7560_c35/f1p1/2004<br>isoform=cb7560_c35;full_length_coverage=1;non_full_length_coverage=1;isoform_length=2004;expected_accuracy=0.998                           | gnl BL_ORD_ID 7381      cb7560_c15/f2p1/2269<br>isoform=cb7560_c15;full_length_coverage=2;non_full_length_coverage=1;isoform_length=2269;expected_accuracy=0.998        | 1   | 1446 | 1444 | 1996 | 1   | 1448 | 1695 | 2269 |



|                                                                                                                                                                                                                                                                                                                                                                                                                                                                                                                                                                                                                                                                                                                                                                                                                                                                                                              |                                                                                                                                                                                                                                                                                                                                                                                                                                                                                                                                                                                         |      |      |      |      |      |          |      |          |
|--------------------------------------------------------------------------------------------------------------------------------------------------------------------------------------------------------------------------------------------------------------------------------------------------------------------------------------------------------------------------------------------------------------------------------------------------------------------------------------------------------------------------------------------------------------------------------------------------------------------------------------------------------------------------------------------------------------------------------------------------------------------------------------------------------------------------------------------------------------------------------------------------------------|-----------------------------------------------------------------------------------------------------------------------------------------------------------------------------------------------------------------------------------------------------------------------------------------------------------------------------------------------------------------------------------------------------------------------------------------------------------------------------------------------------------------------------------------------------------------------------------------|------|------|------|------|------|----------|------|----------|
| racy=0.994<br>cb8564_c75371/f1p0/1913<br>isoform=cb8564_c75371;full_length_coverage=1;non_full_length_coverage=0;isoform_length=1913;expected_accuracy=0.998<br>cb3699_c5/f1p0/2467<br>isoform=cb3699_c5;full_length_coverage=1;non_full_length_coverage=0;isoform_length=2467;expected_accuracy=1.000<br>cb10090_c7/f1p2/1608<br>isoform=cb10090_c7;full_length_coverage=1;non_full_length_coverage=2;isoform_length=1608;expected_accuracy=1.000<br>cb5874_c27/f1p0/2672<br>cb2927_c11/f1p2/2856<br>isoform=cb2927_c11;full_length_coverage=1;non_full_length_coverage=2;isoform_length=2856;expected_accuracy=0.997<br>cb2184_c0/f4p0/2237<br>isoform=cb2184_c0;full_length_coverage=4;non_full_length_coverage=0;isoform_length=2237;expected_accuracy=1.000<br>cb5304_c17/f1p1/2678<br>isoform=cb5304_c17;full_length_coverage=1;non_full_length_coverage=1;isoform_length=2678;expected_accuracy=0.997 | acy=0.997<br>gnl BL_ORD_ID 17076      cb8564_c81253/f1p0/4323<br>isoform=cb8564_c81253;full_length_coverage=1;non_full_length_coverage=0;isoform_length=4323;expected_accuracy=0.999<br>gnl BL_ORD_ID 71454 cb3699_c13/f1p0/2720<br>gnl BL_ORD_ID 48060 cb10090_c3/f1p1/2009<br>gnl BL_ORD_ID 74537 cb5874_c33/f1p0/2945<br>gnl BL_ORD_ID 38415      cb2927_c2/f2p0/3116<br>isoform=cb2927_c2;full_length_coverage=2;non_full_length_coverage=0;isoform_length=3116;expected_accuracy=0.995<br>gnl BL_ORD_ID 56154 cb8564_c70991/f1p13/4645<br>gnl BL_ORD_ID 73763 cb5304_c14/f1p0/2912 | 465  | 1913 | 9    | 464  | 2855 | 430<br>5 | 1    | 457      |
|                                                                                                                                                                                                                                                                                                                                                                                                                                                                                                                                                                                                                                                                                                                                                                                                                                                                                                              |                                                                                                                                                                                                                                                                                                                                                                                                                                                                                                                                                                                         | 1161 | 2467 | 1    | 1162 | 1418 | 272<br>3 | 58   | 1196     |
|                                                                                                                                                                                                                                                                                                                                                                                                                                                                                                                                                                                                                                                                                                                                                                                                                                                                                                              |                                                                                                                                                                                                                                                                                                                                                                                                                                                                                                                                                                                         | 1    | 1123 | 1120 | 1573 | 1    | 1130     | 1547 | 200<br>0 |
|                                                                                                                                                                                                                                                                                                                                                                                                                                                                                                                                                                                                                                                                                                                                                                                                                                                                                                              |                                                                                                                                                                                                                                                                                                                                                                                                                                                                                                                                                                                         | 624  | 2572 | 7    | 623  | 902  | 285<br>1 | 96   | 702      |
|                                                                                                                                                                                                                                                                                                                                                                                                                                                                                                                                                                                                                                                                                                                                                                                                                                                                                                              |                                                                                                                                                                                                                                                                                                                                                                                                                                                                                                                                                                                         | 1    | 1910 | 1909 | 2854 | 5    | 190<br>0 | 2172 | 3116     |
|                                                                                                                                                                                                                                                                                                                                                                                                                                                                                                                                                                                                                                                                                                                                                                                                                                                                                                              |                                                                                                                                                                                                                                                                                                                                                                                                                                                                                                                                                                                         | 1114 | 2237 | 1    | 1116 | 1163 | 39       | 3429 | 231<br>5 |
|                                                                                                                                                                                                                                                                                                                                                                                                                                                                                                                                                                                                                                                                                                                                                                                                                                                                                                              |                                                                                                                                                                                                                                                                                                                                                                                                                                                                                                                                                                                         | 101  | 1907 | 1906 | 2678 | 6    | 181<br>7 | 1932 | 270<br>6 |

|                          |                                                                                                                      |                          |      |      |      |      |      |      |      |     |
|--------------------------|----------------------------------------------------------------------------------------------------------------------|--------------------------|------|------|------|------|------|------|------|-----|
| racy=0.998               |                                                                                                                      |                          |      |      |      |      |      |      |      |     |
| cb8564_c12600/f1p0/2645  | gnl BL_ORD_ID 11862                                                                                                  | cb8564_c13783/f1p0/3760  | 254  | 2645 | 1    | 255  | 377  | 276  | 21   | 274 |
|                          | isoform=cb8564_c13783;full_length_coverage=1;non_full_length_coverage=0;isoform_length=3760;expected_accuracy=0.999  |                          |      |      |      |      |      |      |      |     |
| cb8564_c111744/f1p1/2111 | gnl BL_ORD_ID 12500                                                                                                  | cb8564_c146833/f3p3/2521 | 14   | 1639 | 1635 | 2111 | 1    | 162  | 1793 | 226 |
|                          | isoform=cb8564_c111744;full_length_coverage=1;non_full_length_coverage=1;isoform_length=2111;expected_accuracy=0.998 |                          |      |      |      |      |      |      |      |     |
| cb8564_c48235/f1p1/2252  | gnl BL_ORD_ID 15357                                                                                                  | cb8564_c44284/f4p1/3133  | 1    | 1599 | 1596 | 2236 | 113  | 1711 | 2493 | 313 |
|                          | isoform=cb8564_c44284;full_length_coverage=4;non_full_length_coverage=1;isoform_length=3133;expected_accuracy=1.000  |                          |      |      |      |      |      |      |      |     |
| cb850_c28/f1p0/3553      | gnl BL_ORD_ID 10568                                                                                                  | cb850_c10/f2p0/3928      | 303  | 3550 | 1    | 307  | 684  | 392  | 240  | 545 |
|                          | isoform=cb850_c28;full_length_coverage=1;non_full_length_coverage=0;isoform_length=3553;expected_accuracy=0.992      |                          |      |      |      |      |      |      |      |     |
| cb8564_c85953/f1p0/2986  | gnl BL_ORD_ID 16364                                                                                                  | cb8564_c72362/f4p1/4130  | 175  | 2717 | 1    | 174  | 1570 | 4116 | 78   | 250 |
|                          | isoform=cb8564_c72362;full_length_coverage=4;non_full_length_coverage=1;isoform_length=4130;expected_accuracy=0.998  |                          |      |      |      |      |      |      |      |     |
| cb8564_c186967/f1p0/2513 | gnl BL_ORD_ID 56983                                                                                                  | cb8564_c79327/f1p1/3074  | 1    | 1942 | 1938 | 2477 | 43   | 198  | 2275 | 281 |
|                          | isoform=cb8564_c186967;full_length_coverage=1;non_full_length_coverage=0;isoform_length=2513;expected_accuracy=0.998 |                          |      |      |      |      |      |      |      |     |
| cb2695_c3/f3p0/3385      | gnl BL_ORD_ID 37071                                                                                                  | cb2695_c43/f1p0/3494     | 1378 | 3384 | 11   | 1383 | 1491 | 349  | 1    | 137 |

|                                                                                                                                                 |                                                                                                                                                                                         |      |      |      |      |      |     |      |     |   |
|-------------------------------------------------------------------------------------------------------------------------------------------------|-----------------------------------------------------------------------------------------------------------------------------------------------------------------------------------------|------|------|------|------|------|-----|------|-----|---|
| isoform=cb2695_c3;full_length_coverage=3;non_full_length_coverage=0;isoform_length=3385;expected_accuracy=0.999<br>cb1613_c9/f1p0/2755          | isoform=cb2695_c43;full_length_coverage=1;non_full_length_coverage=0;isoform_length=3494;expected_accuracy=0.995<br>gnl BL_ORD_ID 28654                      cb1613_c1/f1p0/4248        |      |      |      |      |      |     | 4    |     | 4 |
| isoform=cb1613_c9;full_length_coverage=1;non_full_length_coverage=0;isoform_length=2755;expected_accuracy=0.999<br>cb8564_c81003/f1p0/4196      | isoform=cb1613_c1;full_length_coverage=1;non_full_length_coverage=0;isoform_length=4248;expected_accuracy=0.996<br>gnl BL_ORD_ID 56733   cb8564_c69529/f1p0/4528                        | 1    | 2120 | 2118 | 2755 | 22   | 214 | 3516 | 415 | 2 |
| isoform=cb8564_c81003;full_length_coverage=1;non_full_length_coverage=0;isoform_length=4196;expected_accuracy=0.995<br>cb8564_c48153/f1p0/3083  | gnl BL_ORD_ID 18852                      cb8564_c84488/f1p0/3408<br>isoform=cb8564_c84488;full_length_coverage=1;non_full_length_coverage=0;isoform_length=3408;expected_accuracy=0.996 | 1    | 2263 | 2264 | 4192 | 2    | 226 | 2556 | 448 | 7 |
| cb3756_c5/f1p0/3416                                                                                                                             | gnl BL_ORD_ID 70591   cb3756_c11/f1p1/4447                                                                                                                                              | 255  | 2875 | 13   | 255  | 790  | 340 | 1    | 217 | 8 |
| cb8564_c181853/f1p0/2119                                                                                                                        | gnl BL_ORD_ID 55205   cb8564_c35377/f1p0/2958                                                                                                                                           | 1586 | 3392 | 134  | 1589 | 2673 | 447 | 1    | 145 | 9 |
| isoform=cb8564_c181853;full_length_coverage=1;non_full_length_coverage=0;isoform_length=2119;expected_accuracy=0.997<br>cb18456_c1748/f1p0/1180 | gnl BL_ORD_ID 69245   cb18456_c1770/f1p0/1415                                                                                                                                           | 1    | 1339 | 1334 | 2119 | 4    | 134 | 2122 | 291 | 5 |
| cb10946_c4/f1p0/1694                                                                                                                            | gnl BL_ORD_ID 1142                      cb10946_c3/f1p0/3086                                                                                                                            | 243  | 1188 | 3    | 248  | 385  | 133 | 2    | 247 | 0 |
| isoform=cb10946_c4;full_length_coverage=1;non_full_length_coverage=0;isoform_length=1694;expected_accuracy=0.999                                | isoform=cb10946_c3;full_length_coverage=1;non_full_length_coverage=0;isoform_length=3086;expected_accuracy=0.999                                                                        | 355  | 1694 | 58   | 357  | 1704 | 304 | 26   | 325 | 2 |

|                                                                                                                                                                 |                                                                                                                                                                                       |     |      |      |      |     |      |      |      |
|-----------------------------------------------------------------------------------------------------------------------------------------------------------------|---------------------------------------------------------------------------------------------------------------------------------------------------------------------------------------|-----|------|------|------|-----|------|------|------|
| <p>racy=1.000<br/>cb4016_c34/f1p0/2560<br/>isoform=cb4016_c34;full_length_coverage=1;non_full_length_coverage=0;isoform_length=2560;expected_accuracy=0.998</p> | <p>acy=0.994<br/>gnl BL_ORD_ID 40529      cb4016_c2/f3p1/2863<br/>isoform=cb4016_c2;full_length_coverage=3;non_full_length_coverage=1;isoform_length=2863;expected_accuracy=0.998</p> | 194 | 2560 | 12   | 195  | 491 | 2850 | 5    | 189  |
| <p>cb2097_c87/f1p2/2320<br/>isoform=cb2097_c87;full_length_coverage=1;non_full_length_coverage=2;isoform_length=2320;expected_accuracy=0.992</p>                | <p>gnl BL_ORD_ID 36136      cb2097_c106/f1p0/2666<br/>isoform=cb2097_c106;full_length_coverage=1;non_full_length_coverage=0;isoform_length=2666;expected_accuracy=1.000</p>           | 549 | 2304 | 57   | 548  | 890 | 2654 | 140  | 628  |
| <p>cb8564_c51723/f1p2/3016</p>                                                                                                                                  | <p>gnl BL_ORD_ID 14773      cb8564_c31982/f1p3/3384<br/>isoform=cb8564_c31982;full_length_coverage=1;non_full_length_coverage=3;isoform_length=3384;expected_accuracy=0.997</p>       | 139 | 3033 | 1    | 141  | 491 | 3384 | 11   | 151  |
| <p>cb4889_c22/f1p0/2625<br/>isoform=cb4889_c22;full_length_coverage=1;non_full_length_coverage=0;isoform_length=2625;expected_accuracy=0.995</p>                | <p>gnl BL_ORD_ID 73055      cb4889_c55/f1p2/2939</p>                                                                                                                                  | 280 | 2622 | 7    | 285  | 483 | 2824 | 37   | 315  |
| <p>cb3339_c12/f13p1/3205<br/>isoform=cb3339_c12;full_length_coverage=13;non_full_length_coverage=1;isoform_length=3205;expected_accuracy=1.000</p>              | <p>gnl BL_ORD_ID 40811      cb3339_c2/f1p1/3653<br/>isoform=cb3339_c2;full_length_coverage=1;non_full_length_coverage=1;isoform_length=3653;expected_accuracy=0.997</p>               | 1   | 1875 | 1875 | 3191 | 1   | 1864 | 2340 | 3653 |
| <p>cb2759_c6/f1p0/3412</p>                                                                                                                                      | <p>gnl BL_ORD_ID 37960      cb2759_c3/f1p0/3834<br/>isoform=cb2759_c3;full_length_coverage=1;non_full_length_coverage=0;isoform_length=3834;expected_accuracy=0.998</p>               | 194 | 3085 | 11   | 193  | 944 | 3833 | 62   | 244  |
| <p>cb9093_c2/f1p0/1840</p>                                                                                                                                      | <p>gnl BL_ORD_ID 58548      cb9093_c0/f1p0/2192</p>                                                                                                                                   | 1   | 1420 | 1417 | 1840 | 151 | 156  | 1694 | 2115 |

|                                                                                                                     |                                                                                                                      |                          |      |      |      |      |      |     |      |      |   |   |
|---------------------------------------------------------------------------------------------------------------------|----------------------------------------------------------------------------------------------------------------------|--------------------------|------|------|------|------|------|-----|------|------|---|---|
| isoform=cb9093_c2;full_length_coverage=1;non_full_length_coverage=0;isoform_length=1840;expected_accuracy=0.996     |                                                                                                                      |                          |      |      |      |      |      |     |      | 8    |   |   |
| cb8564_c43401/f1p2/3025                                                                                             | gnl BL_ORD_ID 17429                                                                                                  | cb8564_c85447/f1p0/3196  |      |      |      |      |      |     |      |      |   |   |
| isoform=cb8564_c43401;full_length_coverage=1;non_full_length_coverage=2;isoform_length=3025;expected_accuracy=0.995 | isoform=cb8564_c85447;full_length_coverage=1;non_full_length_coverage=0;isoform_length=3196;expected_accuracy=0.997  |                          | 1    | 2485 | 2484 | 3025 | 3    | 241 | 2660 | 319  | 3 | 5 |
| cb8564_c86946/f1p0/3289                                                                                             | gnl BL_ORD_ID 57846                                                                                                  | cb8564_c82432/f1p1/3412  | 1    | 1646 | 1646 | 2831 | 58   | 170 | 1818 | 300  | 3 | 7 |
| cb3229_c3/f2p0/2593                                                                                                 | gnl BL_ORD_ID 40615                                                                                                  | cb3229_c17/f1p0/2804     |      |      |      |      |      |     |      |      |   |   |
| isoform=cb3229_c3;full_length_coverage=2;non_full_length_coverage=0;isoform_length=2593;expected_accuracy=0.997     | isoform=cb3229_c17;full_length_coverage=1;non_full_length_coverage=0;isoform_length=2804;expected_accuracy=1.000     |                          | 1    | 1844 | 1844 | 2502 | 4    | 184 | 2136 | 280  | 7 | 4 |
| cb7241_c2/f1p1/2546                                                                                                 | gnl BL_ORD_ID 8165                                                                                                   | cb7241_c1/f1p1/2663      |      |      |      |      |      |     |      |      |   |   |
| isoform=cb7241_c2;full_length_coverage=1;non_full_length_coverage=1;isoform_length=2546;expected_accuracy=0.999     | isoform=cb7241_c1;full_length_coverage=1;non_full_length_coverage=1;isoform_length=2663;expected_accuracy=0.999      |                          | 1140 | 2546 | 1    | 1141 | 1264 | 266 | 2    | 1154 | 2 |   |
| cb8564_c5007/f1p0/1941                                                                                              | gnl BL_ORD_ID 11479                                                                                                  | cb8564_c148217/f3p5/3754 |      |      |      |      |      |     |      |      |   |   |
|                                                                                                                     | isoform=cb8564_c148217;full_length_coverage=3;non_full_length_coverage=5;isoform_length=3754;expected_accuracy=1.000 |                          | 1    | 1447 | 1446 | 1802 | 1820 | 326 | 3397 | 375  | 5 | 4 |
| cb7416_c3/f1p0/2846                                                                                                 | gnl BL_ORD_ID 51208                                                                                                  | cb7416_c4/f1p1/3436      | 13   | 1342 | 1337 | 2587 | 8    | 134 | 2173 | 342  | 1 | 1 |
| cb1388_c2/f2p0/4190                                                                                                 | gnl BL_ORD_ID 26097                                                                                                  | cb1388_c37/f1p0/5272     |      |      |      |      |      |     |      |      |   |   |
| isoform=cb1388_c2;full_length_coverage=2;non_full_length_coverage=0;isoform_length=4190;expected_accuracy=0.999     | isoform=cb1388_c37;full_length_coverage=1;non_full_length_coverage=0;isoform_length=5272;expected_accuracy=0.999     |                          | 391  | 4190 | 1    | 392  | 1448 | 524 | 20   | 415  | 3 |   |

|                                                                                                                                                     |                                                                                                                                                            |      |      |      |      |      |          |      |          |
|-----------------------------------------------------------------------------------------------------------------------------------------------------|------------------------------------------------------------------------------------------------------------------------------------------------------------|------|------|------|------|------|----------|------|----------|
| acy=0.998<br>cb944_c22/f2p0/1418<br>isoform=cb944_c22;full_length_coverage=2;non_full_length_coverage=0;isoform_length=1418;expected_accuracy=1.000 | acy=0.995<br>gnl BL_ORD_ID 57627 cb944_c41/f1p0/2631                                                                                                       | 299  | 1418 | 3    | 298  | 1275 | 239<br>4 | 4    | 300      |
| cb53_c1/f1p1/4723<br>isoform=cb53_c1;full_length_coverage=1;non_full_length_coverage=1;isoform_length=4723;expected_accuracy=0.996                  | gnl BL_ORD_ID 45270 cb53_c9/f1p3/5277<br>isoform=cb53_c9;full_length_coverage=1;non_full_length_coverage=3;isoform_length=5277;expected_accuracy=0.997     | 1930 | 4721 | 1    | 1933 | 2487 | 527<br>7 | 39   | 197<br>4 |
| cb5412_c0/f2p0/2007                                                                                                                                 | gnl BL_ORD_ID 45659 cb5412_c2/f1p0/3104<br>isoform=cb5412_c2;full_length_coverage=1;non_full_length_coverage=0;isoform_length=3104;expected_accuracy=0.996 | 275  | 2004 | 78   | 274  | 1379 | 310<br>3 | 1    | 196      |
| cb8564_c5070/f1p0/2861                                                                                                                              | gnl BL_ORD_ID 56563 cb8564_c5062/f1p0/3831                                                                                                                 | 10   | 1660 | 1659 | 2831 | 34   | 168<br>1 | 1574 | 274<br>6 |
| cb4042_c8/f1p0/3354                                                                                                                                 | gnl BL_ORD_ID 71743 cb4042_c5/f1p1/3481                                                                                                                    | 213  | 3218 | 1    | 212  | 368  | 337<br>3 | 1    | 203      |
| cb7832_c1/f1p0/2374<br>isoform=cb7832_c1;full_length_coverage=1;non_full_length_coverage=0;isoform_length=2374;expected_accuracy=0.992              | gnl BL_ORD_ID 50746 cb7832_c2/f1p0/2644                                                                                                                    | 1    | 1274 | 1272 | 2287 | 231  | 151<br>0 | 1611 | 263<br>0 |
| cb8564_c43587/f1p0/2930                                                                                                                             | gnl BL_ORD_ID 55962 cb8564_c50282/f1p0/4402                                                                                                                | 15   | 1700 | 1699 | 2936 | 1457 | 317<br>1 | 3065 | 431<br>0 |
| cb1973_c16/f1p0/2444                                                                                                                                | gnl BL_ORD_ID 66570 cb1973_c19/f1p0/3182                                                                                                                   | 1013 | 2376 | 1    | 1013 | 1571 | 2911     | 22   | 103<br>4 |
| cb500_c17/f1p0/2323                                                                                                                                 | gnl BL_ORD_ID 70945 cb500_c39/f1p0/3153                                                                                                                    | 1    | 1293 | 1288 | 2323 | 702  | 199      | 2126 | 316      |

|                                                                                                                     |                                                                                                                     |                         |     |      |      |      |      |      |      |      |
|---------------------------------------------------------------------------------------------------------------------|---------------------------------------------------------------------------------------------------------------------|-------------------------|-----|------|------|------|------|------|------|------|
| isoform=cb500_c17;full_length_coverage=1;non_full_length_coverage=0;isoform_length=2323;expected_accuracy=0.997     |                                                                                                                     |                         |     |      |      |      |      | 4    | 1    |      |
| cb8564_c45242/f1p0/2126                                                                                             | gnl BL_ORD_ID 14407                                                                                                 | cb8564_c44036/f1p0/3258 |     |      |      |      |      |      |      |      |
| isoform=cb8564_c45242;full_length_coverage=1;non_full_length_coverage=0;isoform_length=2126;expected_accuracy=0.990 | isoform=cb8564_c44036;full_length_coverage=1;non_full_length_coverage=0;isoform_length=3258;expected_accuracy=0.992 |                         | 443 | 2121 | 71   | 443  | 1575 | 3258 | 775  | 1147 |
| cb6132_c8/f1p0/1087                                                                                                 | gnl BL_ORD_ID 46172                                                                                                 | cb6132_c4/f1p0/2723     |     |      |      |      |      |      |      |      |
| isoform=cb6132_c8;full_length_coverage=1;non_full_length_coverage=0;isoform_length=1087;expected_accuracy=0.995     | isoform=cb6132_c4;full_length_coverage=1;non_full_length_coverage=0;isoform_length=2723;expected_accuracy=0.995     |                         | 491 | 1087 | 9    | 490  | 2066 | 2662 | 1    | 481  |
| cb6238_c3/f2p0/2360                                                                                                 | gnl BL_ORD_ID 5113                                                                                                  | cb6238_c2/f2p0/2826     |     |      |      |      |      |      |      |      |
| isoform=cb6238_c3;full_length_coverage=2;non_full_length_coverage=0;isoform_length=2360;expected_accuracy=1.000     | isoform=cb6238_c2;full_length_coverage=2;non_full_length_coverage=0;isoform_length=2826;expected_accuracy=1.000     |                         | 1   | 1151 | 1151 | 2264 | 2    | 1152 | 1713 | 2826 |
| cb4653_c0/f1p0/3288                                                                                                 | gnl BL_ORD_ID 42544                                                                                                 | cb4653_c1/f1p0/3426     |     |      |      |      |      |      |      |      |
| isoform=cb4653_c0;full_length_coverage=1;non_full_length_coverage=0;isoform_length=3288;expected_accuracy=0.997     | isoform=cb4653_c1;full_length_coverage=1;non_full_length_coverage=0;isoform_length=3426;expected_accuracy=0.993     |                         | 245 | 3288 | 11   | 246  | 416  | 3423 | 1    | 236  |
| cb7334_c4/f1p0/2579                                                                                                 | gnl BL_ORD_ID 51127                                                                                                 | cb7334_c6/f1p0/2961     |     |      |      |      |      |      |      |      |
| isoform=cb7334_c4;full_length_coverage=1;non_full_length_coverage=0;isoform_length=2579;expected_accuracy=0.999     | isoform=cb7334_c6;full_length_coverage=1;non_full_length_coverage=0;isoform_length=2961;expected_accuracy=0.999     |                         | 463 | 2579 | 5    | 464  | 616  | 2732 | 16   | 478  |
| cb317_c5/f1p0/3451                                                                                                  | gnl BL_ORD_ID 68195                                                                                                 | cb317_c8/f1p1/4711      |     |      |      |      |      |      |      |      |
| isoform=cb317_c5;full_length_coverage=1;non_full_length_coverage=0;isoform_length=3451;expected_accuracy=0.999      | isoform=cb317_c8;full_length_coverage=1;non_full_length_coverage=0;isoform_length=4711;expected_accuracy=0.999      |                         | 1   | 3038 | 3033 | 3317 | 115  | 3159 | 3385 | 3669 |

|                                                                                                                      |                                                                                                                     |                         |      |      |      |      |      |      |      |      |
|----------------------------------------------------------------------------------------------------------------------|---------------------------------------------------------------------------------------------------------------------|-------------------------|------|------|------|------|------|------|------|------|
| y=0.998                                                                                                              |                                                                                                                     |                         |      |      |      |      |      |      |      |      |
| cb8586_c9/flp3/1411                                                                                                  | gnl BL_ORD_ID 17412                                                                                                 | cb8586_c3/flp1/2345     |      |      |      |      |      |      |      |      |
| isoform=cb8586_c9;full_length_coverage=1;non_full_length_coverage=3;isoform_length=1411;expected_accuracy=0.996      | isoform=cb8586_c3;full_length_coverage=1;non_full_length_coverage=1;isoform_length=2345;expected_accuracy=0.996     |                         | 1    | 1053 | 1050 | 1411 | 1    | 1047 | 1948 | 2309 |
| cb8564_c40107/flp0/4108                                                                                              | gnl BL_ORD_ID 15996                                                                                                 | cb8564_c66839/f6p1/4041 |      |      |      |      |      |      |      |      |
|                                                                                                                      | isoform=cb8564_c66839;full_length_coverage=6;non_full_length_coverage=1;isoform_length=4041;expected_accuracy=1.000 |                         | 1603 | 3955 | 1    | 1599 | 1514 | 3866 | 35   | 1634 |
| cb14664_c0/f4p0/1146                                                                                                 | gnl BL_ORD_ID 64215                                                                                                 | cb14664_c5/flp0/1279    |      |      |      |      |      |      |      |      |
| isoform=cb14664_c0;full_length_coverage=4;non_full_length_coverage=0;isoform_length=1146;expected_accuracy=0.996     |                                                                                                                     |                         | 203  | 1133 | 5    | 204  | 346  | 1277 | 1    | 200  |
| cb8564_c180116/flp0/2944                                                                                             | gnl BL_ORD_ID 15193                                                                                                 | cb8564_c42308/flp5/3192 |      |      |      |      |      |      |      |      |
| isoform=cb8564_c180116;full_length_coverage=1;non_full_length_coverage=0;isoform_length=2944;expected_accuracy=0.996 | isoform=cb8564_c42308;full_length_coverage=1;non_full_length_coverage=5;isoform_length=3192;expected_accuracy=0.995 |                         | 1    | 2522 | 2520 | 2944 | 2    | 2537 | 2766 | 3190 |
| cb8564_c46939/flp1/2926                                                                                              | gnl BL_ORD_ID 55502                                                                                                 | cb8564_c43538/flp0/3563 |      |      |      |      |      |      |      |      |
|                                                                                                                      |                                                                                                                     |                         | 1    | 2134 | 2130 | 2870 | 2    | 2149 | 2254 | 2995 |
| cb13748_c22/flp0/3447                                                                                                | gnl BL_ORD_ID 27754                                                                                                 | cb13748_c13/f2p0/3522   |      |      |      |      |      |      |      |      |
|                                                                                                                      | isoform=cb13748_c13;full_length_coverage=2;non_full_length_coverage=0;isoform_length=3522;expected_accuracy=0.998   |                         | 2    | 3102 | 3098 | 3404 | 1    | 3101 | 3216 | 3522 |
| cb548_c65/flp1/2963                                                                                                  | gnl BL_ORD_ID 46779                                                                                                 | cb548_c109/flp0/3280    |      |      |      |      |      |      |      |      |
|                                                                                                                      | isoform=cb548_c109;full_length_coverage=1;non_full_length_coverage=0;isoform_length=3280;expected_accuracy=0.998    |                         | 1293 | 2948 | 1    | 1296 | 1551 | 3204 | 45   | 1340 |



|                          |                                                                                                                                                                                            |     |      |      |      |     |      |      |      |
|--------------------------|--------------------------------------------------------------------------------------------------------------------------------------------------------------------------------------------|-----|------|------|------|-----|------|------|------|
| cb398_c5/f1p0/4384       | acy=0.996<br>gnl BL_ORD_ID 39098                      cb398_c4/f1p0/4400<br>isoform=cb398_c4;full_length_coverage=1;non_full_length_coverage=0;isoform_length=4400;expected_accuracy=0.999 | 177 | 4179 | 1    | 172  | 400 | 4400 | 2    | 172  |
| cb8564_c73853/f1p0/2443  | isoform=cb8564_c73853;full_length_coverage=1;non_full_length_coverage=0;isoform_length=2443;expected_accuracy=1.000<br>gnl BL_ORD_ID 53674   cb8564_c152641/f1p6/2794                      | 1   | 1281 | 1276 | 2442 | 27  | 1303 | 1583 | 2753 |
| cb8564_c139090/f1p2/2322 | gnl BL_ORD_ID 17527                      cb8564_c84215/f1p0/3183<br>isoform=cb8564_c84215;full_length_coverage=1;non_full_length_coverage=0;isoform_length=3183;expected_accuracy=0.997    | 1   | 1810 | 1808 | 2265 | 1   | 1810 | 2697 | 3141 |
| cb5307_c22/f2p0/3012     | isoform=cb5307_c22;full_length_coverage=2;non_full_length_coverage=0;isoform_length=3012;expected_accuracy=0.995<br>gnl BL_ORD_ID 73769   cb5307_c7/f1p0/3894                              | 102 | 1687 | 1683 | 3012 | 3   | 1580 | 2554 | 3883 |
| cb2324_c2/f3p1/3595      | gnl BL_ORD_ID 36741                      cb2324_c5/f2p1/3722<br>isoform=cb2324_c2;full_length_coverage=3;non_full_length_coverage=1;isoform_length=3595;expected_accuracy=0.996            | 274 | 3595 | 21   | 275  | 404 | 3722 | 2    | 258  |
| cb12714_c29/f1p2/1583    | gnl BL_ORD_ID 11957                      cb8564_c135981/f1p0/2840<br>isoform=cb8564_c135981;full_length_coverage=1;non_full_length_coverage=0;isoform_length=2840;expected_accuracy=0.992  | 1   | 1296 | 1293 | 1590 | 189 | 1480 | 2545 | 2840 |
| cb3518_c21/f1p0/1435     | gnl BL_ORD_ID 40086                      cb3518_c14/f1p2/1777                                                                                                                              | 104 | 1420 | 1    | 106  | 465 | 177  | 10   | 117  |

|                                                                                                                  |                                                                                                                                                                                           |      |      |      |      |      |     |      |     |   |  |   |
|------------------------------------------------------------------------------------------------------------------|-------------------------------------------------------------------------------------------------------------------------------------------------------------------------------------------|------|------|------|------|------|-----|------|-----|---|--|---|
| isoform=cb3518_c21;full_length_coverage=1;non_full_length_coverage=0;isoform_length=1435;expected_accuracy=1.000 | isoform=cb3518_c14;full_length_coverage=1;non_full_length_coverage=2;isoform_length=1777;expected_accuracy=0.994                                                                          |      |      |      |      |      |     |      |     | 7 |  |   |
| cb2737_c42/f1p0/2881                                                                                             | gnl BL_ORD_ID 38133                      cb2737_c21/f1p2/3479<br>isoform=cb2737_c21;full_length_coverage=1;non_full_length_coverage=2;isoform_length=3479;expected_accuracy=1.000         | 1    | 1427 | 1425 | 2632 | 577  | 200 | 2135 | 334 | 3 |  | 2 |
| cb8564_c14775/f1p1/2535                                                                                          | gnl BL_ORD_ID 11111                      cb8564_c108411/f1p1/3146<br>isoform=cb8564_c108411;full_length_coverage=1;non_full_length_coverage=1;isoform_length=3146;expected_accuracy=0.991 | 1056 | 2492 | 1    | 1058 | 1695 | 314 | 170  | 124 | 5 |  | 2 |
| cb316_c44/f1p3/4198                                                                                              | gnl BL_ORD_ID 69554                      cb316_c10/f1p2/4819<br>isoform=cb316_c44;full_length_coverage=1;non_full_length_coverage=3;isoform_length=4198;expected_accuracy=0.994           | 24   | 2660 | 2656 | 4198 | 71   | 270 | 3318 | 486 | 2 |  | 1 |
| cb16438_c1/f2p0/1049                                                                                             | gnl BL_ORD_ID 65268                      cb16438_c2/f1p0/1232<br>isoform=cb16438_c1;full_length_coverage=2;non_full_length_coverage=0;isoform_length=1049;expected_accuracy=1.000         | 336  | 1049 | 4    | 336  | 512  | 122 | 1    | 332 | 6 |  |   |
| cb7642_c139/f1p0/2022                                                                                            | gnl BL_ORD_ID 6567                      cb7642_c138/f1p0/2345<br>isoform=cb7642_c139;full_length_coverage=1;non_full_length_coverage=0;isoform_length=2022;expected_accuracy=0.993        | 1    | 1475 | 1476 | 2020 | 129  | 160 | 1800 | 234 | 3 |  | 5 |
| cb124_c26/f1p0/3756                                                                                              | gnl BL_ORD_ID 24083                      cb124_c45/f1p0/3856<br>isoform=cb124_c45;full_length_coverage=1;non_full_length_coverage=0;isoform_length=3856;expected_accuracy=0.994           | 1    | 3076 | 3073 | 3720 | 1    | 307 | 3203 | 385 | 5 |  | 0 |

|                         |                                                                                                                                                                                            |     |      |      |      |     |      |      |      |
|-------------------------|--------------------------------------------------------------------------------------------------------------------------------------------------------------------------------------------|-----|------|------|------|-----|------|------|------|
| cb737_c27/f1p0/4113     | cy=0.996<br>gnl BL_ORD_ID 7432                      cb737_c72/f3p2/4288<br>isoform=cb737_c72;full_length_coverage=3;non_full_length_coverage=2;isoform_length=4288;expected_accuracy=0.998 | 1   | 3348 | 3347 | 4115 | 15  | 3363 | 3520 | 4288 |
| cb5612_c14/f3p0/2416    | gnl BL_ORD_ID 45308                      cb5612_c2/f2p0/2528<br>isoform=cb5612_c14;full_length_coverage=3;non_full_length_coverage=0;isoform_length=2416;expected_accuracy=0.998           | 148 | 2414 | 1    | 147  | 260 | 2526 | 9    | 155  |
| cb8564_c68023/f5p1/3648 | gnl BL_ORD_ID 16243                      cb8564_c69770/f1p2/3779<br>isoform=cb8564_c68023;full_length_coverage=5;non_full_length_coverage=1;isoform_length=3648;expected_accuracy=1.000    | 271 | 3648 | 1    | 274  | 388 | 3764 | 9    | 278  |
| cb5440_c2/f3p1/1394     | gnl BL_ORD_ID 46312                      cb5440_c8/f1p1/3070<br>isoform=cb5440_c2;full_length_coverage=3;non_full_length_coverage=1;isoform_length=1394;expected_accuracy=0.998            | 1   | 1067 | 1062 | 1394 | 63  | 1142 | 2735 | 3070 |
| cb322_c15/f1p0/3487     | gnl BL_ORD_ID 69560                      cb322_c25/f1p0/3845<br>isoform=cb322_c15;full_length_coverage=1;non_full_length_coverage=0;isoform_length=3487;expected_accuracy=0.997            | 1   | 2729 | 2728 | 3487 | 7   | 2732 | 2878 | 3636 |
| cb14792_c2/f1p0/1864    | gnl BL_ORD_ID 19072                      cb8564_c88935/f5p2/2290<br>isoform=cb14792_c2;full_length_coverage=1;non_full_length_coverage=0;isoform_length=1864;expected_accuracy=0.995       | 1   | 1524 | 1519 | 1818 | 257 | 1780 | 1991 | 2290 |
| cb8564_c52935/f1p0/3498 | gnl BL_ORD_ID 54440                      cb8564_c46842/f1p0/3416<br>isoform=cb8564_c52935;full_length_coverage=1;non_full_length_coverage=0;isoform_length=3498;expected_accuracy=0.998    | 1   | 2027 | 2025 | 3322 | 1   | 202  | 2138 | 343  |

|                         |                                                                                                                                                                         |     |      |      |      |      |          |      |          |
|-------------------------|-------------------------------------------------------------------------------------------------------------------------------------------------------------------------|-----|------|------|------|------|----------|------|----------|
|                         |                                                                                                                                                                         |     |      |      |      |      |          | 8    | 5        |
| cb2272_c12/f1p0/5238    | gnl BL_ORD_ID 38157      cb2272_c10/f1p0/6304<br>isoform=cb2272_c10;full_length_coverage=1;non_full_length_coverage=0;isoform_length=6304;expected_accuracy=0.996       | 128 | 2695 | 2691 | 5193 | 215  | 277<br>9 | 3807 | 630<br>4 |
| cb8564_c71802/f1p1/3657 | gnl BL_ORD_ID 15937      cb8564_c69148/f2p0/3719<br>isoform=cb8564_c71802;full_length_coverage=1;non_full_length_coverage=1;isoform_length=3657;expected_accuracy=1.000 | 1   | 2767 | 2768 | 3561 | 47   | 280<br>6 | 2926 | 371<br>9 |
| cb14322_c5/f1p0/1783    | gnl BL_ORD_ID 53245      cb8564_c119806/f1p0/2166                                                                                                                       | 1   | 1580 | 1576 | 1786 | 94   | 167<br>9 | 1873 | 208<br>4 |
| cb5460_c7/f1p0/2109     | gnl BL_ORD_ID 73948      cb5460_c9/f1p1/2896<br>isoform=cb5460_c7;full_length_coverage=1;non_full_length_coverage=0;isoform_length=2109;expected_accuracy=0.997         | 1   | 1344 | 1340 | 2030 | 752  | 209<br>5 | 2217 | 290<br>6 |
| cb8564_c36689/f1p1/2368 | gnl BL_ORD_ID 55413      cb8564_c40978/f1p0/3073<br>isoform=cb8564_c36689;full_length_coverage=1;non_full_length_coverage=1;isoform_length=2368;expected_accuracy=0.991 | 1   | 1709 | 1706 | 2368 | 1    | 168<br>3 | 2182 | 284<br>5 |
| cb11885_c4/f1p0/1695    | gnl BL_ORD_ID 71762      cb4066_c10/f1p1/3649<br>isoform=cb11885_c4;full_length_coverage=1;non_full_length_coverage=0;isoform_length=1695;expected_accuracy=0.998       | 232 | 1641 | 3    | 232  | 2227 | 363<br>6 | 1    | 231      |
| cb8564_c21764/f1p0/2599 | gnl BL_ORD_ID 56491      cb8564_c77843/f1p0/2830<br>isoform=cb8564_c21764;full_length_coverage=1;non_full_length_coverage=0;isoform_length=2599;expected_accuracy=0.998 | 1   | 2030 | 2030 | 2607 | 158  | 218<br>5 | 2069 | 264<br>6 |
| cb4233_c155/f1p1/2407   | gnl BL_ORD_ID 71867      cb4233_c156/f1p1/2451                                                                                                                          | 128 | 2175 | 1    | 132  | 400  | 244      | 7    | 139      |

|                                                                                                                      |                                                                                                                      |                          |      |      |      |      |      |      |      |      |
|----------------------------------------------------------------------------------------------------------------------|----------------------------------------------------------------------------------------------------------------------|--------------------------|------|------|------|------|------|------|------|------|
| cb8564_c77203/f2p0/2820                                                                                              | gnl BL_ORD_ID 14537                                                                                                  | cb8564_c36204/f3p0/3065  |      |      |      |      |      | 8    |      |      |
| isoform=cb8564_c77203;full_length_coverage=2;non_full_length_coverage=0;isoform_length=2820;expected_accuracy=0.996  | isoform=cb8564_c36204;full_length_coverage=3;non_full_length_coverage=0;isoform_length=3065;expected_accuracy=0.997  |                          | 1372 | 2819 | 1    | 1374 | 1618 | 3065 | 1    | 1374 |
| cb8564_c91518/f1p0/3380                                                                                              | gnl BL_ORD_ID 16911                                                                                                  | cb8564_c72734/f1p0/3132  |      |      |      |      |      | 2881 | 2989 | 3132 |
| isoform=cb8564_c91518;full_length_coverage=1;non_full_length_coverage=0;isoform_length=3380;expected_accuracy=0.995  | isoform=cb8564_c72734;full_length_coverage=1;non_full_length_coverage=0;isoform_length=3132;expected_accuracy=0.995  |                          | 1    | 2710 | 2709 | 2852 | 188  | 2881 | 2989 | 3132 |
| cb8564_c3718/f1p0/2760                                                                                               | gnl BL_ORD_ID 12841                                                                                                  | cb8564_c168338/f2p0/3398 |      |      |      |      |      | 2186 | 2295 | 2887 |
| isoform=cb8564_c3718;full_length_coverage=2;non_full_length_coverage=0;isoform_length=3398;expected_accuracy=0.999   | isoform=cb8564_c168338;full_length_coverage=2;non_full_length_coverage=0;isoform_length=3398;expected_accuracy=0.999 |                          | 1    | 2149 | 2148 | 2740 | 40   | 2186 | 2295 | 2887 |
| cb8564_c91149/f1p5/2619                                                                                              | gnl BL_ORD_ID 56381                                                                                                  | cb8564_c75626/f1p2/3199  |      |      |      |      |      | 2116 | 2611 | 3088 |
| isoform=cb8564_c91149;full_length_coverage=1;non_full_length_coverage=5;isoform_length=2619;expected_accuracy=0.997  | isoform=cb8564_c75626;full_length_coverage=1;non_full_length_coverage=5;isoform_length=3199;expected_accuracy=0.997  |                          | 1    | 2125 | 2123 | 2614 | 4    | 2116 | 2611 | 3088 |
| cb8564_c129154/f1p0/2632                                                                                             | gnl BL_ORD_ID 53022                                                                                                  | cb8564_c114466/f1p0/3000 |      |      |      |      |      | 1610 | 1943 | 2946 |
| isoform=cb8564_c129154;full_length_coverage=1;non_full_length_coverage=0;isoform_length=2632;expected_accuracy=0.997 | isoform=cb8564_c114466;full_length_coverage=1;non_full_length_coverage=0;isoform_length=3000;expected_accuracy=0.997 |                          | 1    | 1586 | 1587 | 2590 | 22   | 1610 | 1943 | 2946 |
| cb13045_c6/f1p0/1293                                                                                                 | gnl BL_ORD_ID 16485                                                                                                  | cb8564_c72854/f1p0/3264  |      |      |      |      |      | 1058 | 2149 | 2434 |
| isoform=cb13045_c6;full_length_coverage=1;non_full_length_coverage=0;isoform_length=1293;expected_accuracy=0.991     | isoform=cb8564_c72854;full_length_coverage=1;non_full_length_coverage=0;isoform_length=3264;expected_accuracy=1.000  |                          | 1    | 1011 | 1008 | 1293 | 48   | 1058 | 2149 | 2434 |
| cb693_c7/f1p0/2901                                                                                                   | gnl BL_ORD_ID 4971                                                                                                   | cb693_c3/f1p0/3671       |      |      |      |      |      | 249  | 3296 | 366  |
| isoform=cb693_c7;full_length_coverage=1;non_full_length_coverage=0;isoform_length=2901;expected_accuracy=0.999       | isoform=cb693_c3;full_length_coverage=1;non_full_length_coverage=0;isoform_length=3671;expected_accuracy=0.999       |                          | 1    | 2459 | 2460 | 2828 | 45   | 249  | 3296 | 366  |

|                                                                                                                      |                                                                                                                      |     |      |      |      |      |          |      |          |
|----------------------------------------------------------------------------------------------------------------------|----------------------------------------------------------------------------------------------------------------------|-----|------|------|------|------|----------|------|----------|
|                                                                                                                      | isoform=cb693_c3;full_length_coverage=1;non_full_length_coverage=0;isoform_length=3671;expected_accuracy=0.995       |     |      |      |      |      | 7        |      | 3        |
| cb9467_c4/f9p0/2081                                                                                                  | gnl BL_ORD_ID 20200      cb9467_c17/f1p0/3298                                                                        |     |      |      |      |      |          |      |          |
| isoform=cb9467_c4;full_length_coverage=9;non_full_length_coverage=0;isoform_length=2081;expected_accuracy=0.999      | isoform=cb9467_c17;full_length_coverage=1;non_full_length_coverage=0;isoform_length=3298;expected_accuracy=1.000     | 163 | 2067 | 1    | 162  | 1353 | 325<br>1 | 1    | 162      |
| cb8564_c152519/f2p1/2103                                                                                             | gnl BL_ORD_ID 11147      cb8564_c120697/f1p0/2276                                                                    |     |      |      |      |      |          |      |          |
| isoform=cb8564_c152519;full_length_coverage=2;non_full_length_coverage=1;isoform_length=2103;expected_accuracy=1.000 | isoform=cb8564_c120697;full_length_coverage=1;non_full_length_coverage=0;isoform_length=2276;expected_accuracy=0.995 | 1   | 1562 | 1559 | 2069 | 52   | 161<br>4 | 1756 | 226<br>6 |
| cb7463_c5/f1p0/2362                                                                                                  | gnl BL_ORD_ID 7043      cb7463_c6/f1p0/2483                                                                          |     |      |      |      |      |          |      |          |
| isoform=cb7463_c5;full_length_coverage=1;non_full_length_coverage=0;isoform_length=2362;expected_accuracy=0.995      | isoform=cb7463_c6;full_length_coverage=1;non_full_length_coverage=0;isoform_length=2483;expected_accuracy=0.997      | 177 | 2297 | 1    | 180  | 394  | 248<br>3 | 45   | 224      |
| cb8564_c88569/f1p3/3382                                                                                              | gnl BL_ORD_ID 19263      cb8564_c80691/f1p1/3438                                                                     |     |      |      |      |      |          |      |          |
| isoform=cb8564_c88569;full_length_coverage=1;non_full_length_coverage=3;isoform_length=3382;expected_accuracy=0.998  | isoform=cb8564_c80691;full_length_coverage=1;non_full_length_coverage=1;isoform_length=3438;expected_accuracy=1.000  | 141 | 2480 | 2479 | 3372 | 96   | 243<br>6 | 2546 | 343<br>8 |
| cb9813_c128/f1p0/1498                                                                                                | gnl BL_ORD_ID 58920      cb9813_c57/f1p0/1921                                                                        |     |      |      |      |      |          |      |          |
| isoform=cb9813_c128;full_length_coverage=1;non_full_length_coverage=0;isoform_length=1498;expected_accuracy=1.000    | isoform=cb9813_c57;full_length_coverage=1;non_full_length_coverage=0;isoform_length=1921;expected_accuracy=1.000     | 175 | 1498 | 8    | 179  | 351  | 167<br>2 | 4    | 175      |
| cb12931_c15/f1p0/1493                                                                                                | gnl BL_ORD_ID 14382      cb8564_c38947/f1p0/2650                                                                     |     |      |      |      |      |          |      |          |
| isoform=cb12931_c15;full_length_coverage=1;non_full_length_coverage=0;isoform_length=1493;expected_accuracy=1.000    | isoform=cb8564_c38947;full_length_coverage=1;non_full_length_coverage=0;isoform_length=2650;expected_accuracy=0.996  | 1   | 1106 | 1104 | 1492 | 1    | 1104     | 2262 | 265<br>0 |
| cb6623_c27/f1p1/2886                                                                                                 | gnl BL_ORD_ID 49890      cb6623_c26/f1p0/3303                                                                        |     |      |      |      |      |          |      |          |
| isoform=cb6623_c27;full_length_coverage=1;non_full_length_coverage=0;isoform_length=2886;expected_accuracy=1.000     | isoform=cb6623_c26;full_length_coverage=1;non_full_length_coverage=0;isoform_length=3303;expected_accuracy=1.000     | 626 | 2644 | 7    | 630  | 1234 | 325      | 50   | 673      |



|                                                                                                                                                        |                                                                                                                                                                                                |     |      |      |      |     |          |      |          |
|--------------------------------------------------------------------------------------------------------------------------------------------------------|------------------------------------------------------------------------------------------------------------------------------------------------------------------------------------------------|-----|------|------|------|-----|----------|------|----------|
| racy=0.994<br>cb7969_c11/f1p0/1950<br>isoform=cb7969_c11;full_length_coverage=1;non_full_length_coverage=0;isoform_length=1950;expected_accuracy=0.992 | curacy=0.993<br>gnl BL_ORD_ID 6552                      cb7969_c4/f1p0/2324<br>isoform=cb7969_c4;full_length_coverage=1;non_full_length_coverage=0;isoform_length=2324;expected_accuracy=0.996 | 1   | 1409 | 1405 | 1927 | 122 | 153<br>2 | 1777 | 232<br>1 |
| cb14724_c4/f1p0/1676                                                                                                                                   | gnl BL_ORD_ID 40277                      cb3622_c10/f1p0/3532<br>isoform=cb3622_c10;full_length_coverage=1;non_full_length_coverage=0;isoform_length=3532;expected_accuracy=0.999              | 1   | 1330 | 1329 | 1649 | 25  | 135<br>1 | 3211 | 353<br>1 |
| cb16550_c1/f1p2/1845<br>isoform=cb16550_c1;full_length_coverage=1;non_full_length_coverage=2;isoform_length=1845;expected_accuracy=0.999               | gnl BL_ORD_ID 11486                      cb8564_c127460/f1p2/2151<br>isoform=cb8564_c127460;full_length_coverage=1;non_full_length_coverage=2;isoform_length=2151;expected_accuracy=0.998      | 1   | 1212 | 1207 | 1845 | 73  | 128<br>7 | 1510 | 214<br>3 |
| cb8564_c161530/f1p7/3594<br>isoform=cb8564_c161530;full_length_coverage=1;non_full_length_coverage=7;isoform_length=3594;expected_accuracy=0.999       | gnl BL_ORD_ID 58077                      cb8564_c88175/f1p0/4011                                                                                                                               | 132 | 2862 | 2862 | 3594 | 12  | 274<br>2 | 3254 | 398<br>1 |
| cb5600_c16/f1p0/2870                                                                                                                                   | gnl BL_ORD_ID 45243                      cb5600_c5/f1p0/2860<br>isoform=cb5600_c5;full_length_coverage=1;non_full_length_coverage=0;isoform_length=2860;expected_accuracy=0.997                | 1   | 2143 | 2140 | 2697 | 33  | 217<br>3 | 2304 | 286<br>0 |
| cb14634_c57/f1p0/2155<br>isoform=cb14634_c57;full_length_coverage=1;non_full_length_coverage=0;isoform_length=2155;expected_accuracy=0.994             | gnl BL_ORD_ID 64192                      cb14634_c60/f1p0/2755                                                                                                                                 | 1   | 1295 | 1292 | 2155 | 39  | 133<br>8 | 1910 | 277<br>5 |
| cb2674_c19/f1p0/3539                                                                                                                                   | gnl BL_ORD_ID 38772                      cb2674_c2/f2p4/3751                                                                                                                                   | 1   | 2456 | 2457 | 3511 | 83  | 254      | 2683 | 375      |



|                                                                                                                                             |                                                                                                                                                                    |      |      |      |      |      |     |      |      |
|---------------------------------------------------------------------------------------------------------------------------------------------|--------------------------------------------------------------------------------------------------------------------------------------------------------------------|------|------|------|------|------|-----|------|------|
| isoform=cb2674_c19;full_length_coverage=1;non_full_length_coverage=0;isoform_length=3539;expected_accuracy=0.993<br>cb8564_c43399/f1p0/2654 | isoform=cb2674_c2;full_length_coverage=2;non_full_length_coverage=4;isoform_length=3751;expected_accuracy=0.994                                                    |      |      |      |      |      |     | 7    | 0    |
| isoform=cb8564_c43399;full_length_coverage=1;non_full_length_coverage=0;isoform_length=2654;expected_accuracy=0.999<br>cb3964_c2/f1p0/3477  | gnl BL_ORD_ID 61972 cb12931_c30/f1p0/5903                                                                                                                          | 1    | 2367 | 2363 | 2654 | 1    | 236 | 2578 | 2869 |
| cb8564_c38151/f1p3/3560                                                                                                                     | gnl BL_ORD_ID 71680 cb3964_c3/f1p0/3409                                                                                                                            | 1555 | 3301 | 1    | 1556 | 1658 | 340 | 1    | 1556 |
| cb4114_c4/f1p0/3095                                                                                                                         | gnl BL_ORD_ID 56035 cb8564_c52940/f1p2/3963                                                                                                                        | 13   | 2308 | 2307 | 3454 | 5    | 230 | 2793 | 3940 |
| isoform=cb4114_c4;full_length_coverage=1;non_full_length_coverage=0;isoform_length=3095;expected_accuracy=1.000<br>cb8539_c3/f2p0/2041      | gnl BL_ORD_ID 39263 cb4114_c1/f1p0/3431<br>isoform=cb4114_c1;full_length_coverage=1;non_full_length_coverage=0;isoform_length=3431;expected_accuracy=0.997         | 1239 | 3095 | 120  | 1242 | 1571 | 343 | 32   | 1153 |
| isoform=cb8539_c3;full_length_coverage=2;non_full_length_coverage=0;isoform_length=2041;expected_accuracy=1.000                             | gnl BL_ORD_ID 10886 cb8539_c5/f1p0/2106<br>isoform=cb8539_c5;full_length_coverage=1;non_full_length_coverage=0;isoform_length=2106;expected_accuracy=0.996         | 552  | 2041 | 84   | 553  | 610  | 209 | 1    | 471  |
| cb8564_c15230/f1p0/1944                                                                                                                     | gnl BL_ORD_ID 55861 cb8564_c47234/f1p0/2932                                                                                                                        | 352  | 1944 | 60   | 357  | 1104 | 269 | 97   | 394  |
| cb8564_c115246/f1p0/2687                                                                                                                    | gnl BL_ORD_ID 11306 cb8564_c14717/f1p0/4274<br>isoform=cb8564_c14717;full_length_coverage=1;non_full_length_coverage=0;isoform_length=4274;expected_accuracy=0.996 | 1317 | 2664 | 1    | 1322 | 2923 | 427 | 761  | 2078 |
| cb2527_c48/f10p2/3282                                                                                                                       | gnl BL_ORD_ID 68590 cb2527_c17/f1p1/3542                                                                                                                           | 1    | 1906 | 1902 | 3203 | 1    | 190 | 2256 | 355  |

|                                                                                                                      |                                                                                                                      |     |      |      |      |      |      |      |      |   |
|----------------------------------------------------------------------------------------------------------------------|----------------------------------------------------------------------------------------------------------------------|-----|------|------|------|------|------|------|------|---|
| isoform=cb2527_c48;full_length_coverage=10;non_full_length_coverage=2;isoform_length=3282;expected_accuracy=0.997    |                                                                                                                      |     |      |      |      |      |      | 6    |      | 7 |
| cb8564_c37361/f1p0/3076                                                                                              | gnl BL_ORD_ID 13575      cb8564_c20499/f3p0/3328                                                                     |     |      |      |      |      |      |      |      |   |
|                                                                                                                      | isoform=cb8564_c20499;full_length_coverage=3;non_full_length_coverage=0;isoform_length=3328;expected_accuracy=1.000  | 1   | 2481 | 2477 | 3070 | 1    | 2482 | 2583 | 3176 |   |
| cb8564_c42814/f1p0/2151                                                                                              | gnl BL_ORD_ID 55177      cb8564_c34740/f1p0/3512                                                                     |     |      |      |      |      |      |      |      |   |
| isoform=cb8564_c42814;full_length_coverage=1;non_full_length_coverage=0;isoform_length=2151;expected_accuracy=0.993  |                                                                                                                      | 650 | 2151 | 7    | 652  | 1691 | 3194 | 1    | 677  |   |
| cb3213_c13/f1p0/2292                                                                                                 | gnl BL_ORD_ID 40431      cb3213_c4/f4p0/2414                                                                         |     |      |      |      |      |      |      |      |   |
|                                                                                                                      | isoform=cb3213_c4;full_length_coverage=4;non_full_length_coverage=0;isoform_length=2414;expected_accuracy=0.995      | 104 | 2196 | 1    | 104  | 316  | 2414 | 88   | 191  |   |
| cb8564_c38035/f1p0/2770                                                                                              | gnl BL_ORD_ID 13512      cb8564_c186209/f1p0/2931                                                                    |     |      |      |      |      |      |      |      |   |
|                                                                                                                      | isoform=cb8564_c186209;full_length_coverage=1;non_full_length_coverage=0;isoform_length=2931;expected_accuracy=0.996 | 1   | 2035 | 2033 | 2756 | 1    | 2017 | 2207 | 2931 |   |
| cb8564_c113445/f1p1/1964                                                                                             | gnl BL_ORD_ID 17614      cb8564_c92081/f1p1/2901                                                                     |     |      |      |      |      |      |      |      |   |
| isoform=cb8564_c113445;full_length_coverage=1;non_full_length_coverage=1;isoform_length=1964;expected_accuracy=0.995 | isoform=cb8564_c92081;full_length_coverage=1;non_full_length_coverage=1;isoform_length=2901;expected_accuracy=0.995  | 1   | 1530 | 1535 | 1964 | 1    | 1528 | 2441 | 2869 |   |
| cb8564_c2223/f1p0/2047                                                                                               | gnl BL_ORD_ID 13707      cb8564_c2273/f1p2/2502                                                                      |     |      |      |      |      |      |      |      |   |
|                                                                                                                      | isoform=cb8564_c2273;full_length_coverage=1;non_full_length_coverage=2;isoform_length=2502;expected_ac               | 434 | 2040 | 49   | 439  | 888  | 2502 | 56   | 445  |   |

|                                                                                                                     |                                                                                                                      |     |      |      |      |      |      |      |      |  |
|---------------------------------------------------------------------------------------------------------------------|----------------------------------------------------------------------------------------------------------------------|-----|------|------|------|------|------|------|------|--|
| cb8564_c44698/f1p5/2843                                                                                             | curacy=0.995<br>gnl BL_ORD_ID 14556      cb8564_c45150/f1p0/2940                                                     |     |      |      |      |      |      |      |      |  |
| isoform=cb8564_c44698;full_length_coverage=1;non_full_length_coverage=5;isoform_length=2843;expected_accuracy=0.997 | isoform=cb8564_c45150;full_length_coverage=1;non_full_length_coverage=0;isoform_length=2940;expected_accuracy=0.992  | 1   | 2516 | 2511 | 2835 | 1    | 2496 | 2616 | 2940 |  |
| cb2471_c2/f7p1/2180                                                                                                 | gnl BL_ORD_ID 69758      cb2471_c14/f1p0/2261                                                                        |     |      |      |      |      |      |      |      |  |
| isoform=cb2471_c2;full_length_coverage=7;non_full_length_coverage=1;isoform_length=2180;expected_accuracy=1.000     |                                                                                                                      | 266 | 2180 | 86   | 268  | 355  | 2256 | 1    | 183  |  |
| cb2156_c24/f1p1/2545                                                                                                | gnl BL_ORD_ID 35009      cb2156_c82/f5p1/2836                                                                        |     |      |      |      |      |      |      |      |  |
| isoform=cb2156_c24;full_length_coverage=1;non_full_length_coverage=1;isoform_length=2545;expected_accuracy=0.991    | isoform=cb2156_c82;full_length_coverage=5;non_full_length_coverage=1;isoform_length=2836;expected_accuracy=1.000     | 1   | 1422 | 1420 | 2545 | 43   | 1480 | 1605 | 2735 |  |
| cb8564_c90621/f1p2/3030                                                                                             | gnl BL_ORD_ID 15376      cb8564_c31588/f10p3/3394                                                                    |     |      |      |      |      |      |      |      |  |
| isoform=cb8564_c90621;full_length_coverage=1;non_full_length_coverage=2;isoform_length=3030;expected_accuracy=0.994 | isoform=cb8564_c31588;full_length_coverage=10;non_full_length_coverage=3;isoform_length=3394;expected_accuracy=1.000 | 206 | 3027 | 1    | 205  | 546  | 3366 | 208  | 412  |  |
| cb3783_c15/f1p2/3106                                                                                                | gnl BL_ORD_ID 40402      cb3783_c2/f1p2/3529                                                                         |     |      |      |      |      |      |      |      |  |
| isoform=cb3783_c15;full_length_coverage=1;non_full_length_coverage=2;isoform_length=3106;expected_accuracy=0.993    | isoform=cb3783_c2;full_length_coverage=1;non_full_length_coverage=2;isoform_length=3529;expected_accuracy=0.998      | 1   | 1776 | 1772 | 3106 | 7    | 1779 | 2250 | 3521 |  |
| cb1298_c1/f3p0/2128                                                                                                 | gnl BL_ORD_ID 61206      cb1298_c8/f1p0/2338                                                                         |     |      |      |      |      |      |      |      |  |
| isoform=cb1298_c1;full_length_coverage=3;non_full_length_coverage=0;isoform_length=2128;expected_accuracy=0.996     |                                                                                                                      | 1   | 1343 | 1343 | 2074 | 38   | 1379 | 1552 | 2283 |  |
| cb5596_c6/f10p0/2530                                                                                                | gnl BL_ORD_ID 74127      cb5596_c16/f1p0/3416                                                                        |     |      |      |      |      |      |      |      |  |
|                                                                                                                     |                                                                                                                      | 299 | 2528 | 88   | 302  | 1182 | 3411 | 1    | 216  |  |

|                                                                                                                     |                                                                                                                     |                         |     |      |      |      |      |      |      |     |
|---------------------------------------------------------------------------------------------------------------------|---------------------------------------------------------------------------------------------------------------------|-------------------------|-----|------|------|------|------|------|------|-----|
| isoform=cb5596_c6;full_length_coverage=10;non_full_length_coverage=0;isoform_length=2530;expected_accuracy=1.000    |                                                                                                                     |                         |     |      |      |      |      |      |      |     |
| cb12302_c30/f1p0/1673                                                                                               | gnl BL_ORD_ID 27346                                                                                                 | cb1380_c17/f1p1/1771    |     |      |      |      |      |      |      |     |
| isoform=cb12302_c30;full_length_coverage=1;non_full_length_coverage=0;isoform_length=1673;expected_accuracy=0.992   | isoform=cb1380_c17;full_length_coverage=1;non_full_length_coverage=1;isoform_length=1771;expected_accuracy=0.993    |                         | 284 | 1632 | 3    | 288  | 410  | 177  | 3    | 296 |
| cb8564_c10630/f1p2/2801                                                                                             | gnl BL_ORD_ID 10274                                                                                                 | cb8564_c11542/f1p2/2858 |     |      |      |      |      |      |      |     |
| isoform=cb8564_c10630;full_length_coverage=1;non_full_length_coverage=2;isoform_length=2801;expected_accuracy=1.000 | isoform=cb8564_c11542;full_length_coverage=1;non_full_length_coverage=2;isoform_length=2858;expected_accuracy=0.997 |                         | 1   | 2162 | 2161 | 2758 | 1    | 216  | 2264 | 285 |
|                                                                                                                     | gnl BL_ORD_ID 4332                                                                                                  | cb6835_c11/f1p2/2231    |     |      |      |      |      |      |      |     |
| cb6835_c30/f1p0/2031                                                                                                | isoform=cb6835_c11;full_length_coverage=1;non_full_length_coverage=2;isoform_length=2231;expected_accuracy=0.998    |                         | 716 | 1918 | 8    | 719  | 1029 | 223  | 1    | 711 |
| cb8564_c41162/f1p0/3158                                                                                             | gnl BL_ORD_ID 57017                                                                                                 | cb8564_c80370/f1p0/3493 |     |      |      |      |      |      |      |     |
| cb3826_c8/f1p0/3348                                                                                                 | isoform=cb3826_c8;full_length_coverage=1;non_full_length_coverage=0;isoform_length=3348;expected_accuracy=0.994     |                         | 124 | 2553 | 2548 | 3042 | 3085 | 652  | 521  | 27  |
| cb313_c3/f2p0/2434                                                                                                  | gnl BL_ORD_ID 71538                                                                                                 | cb3826_c3/f1p0/3517     |     |      |      |      |      |      |      |     |
| isoform=cb313_c3;full_length_coverage=2;non_full_length_coverage=0;isoform_length=2434;expected_accuracy=0.995      | isoform=cb3826_c3;full_length_coverage=1;non_full_length_coverage=0;isoform_length=3517;expected_accuracy=0.994     |                         | 1   | 2584 | 2579 | 3348 | 1    | 258  | 2693 | 346 |
| cb781_c2/f3p0/1827                                                                                                  | gnl BL_ORD_ID 68193                                                                                                 | cb313_c25/f1p0/3123     |     |      |      |      |      |      |      |     |
| isoform=cb781_c2;full_length_coverage=3;non_full_length_coverage=0;isoform_length=1827;expected_accuracy=0.995      | isoform=cb313_c25;full_length_coverage=2;non_full_length_coverage=0;isoform_length=3123;expected_accuracy=0.995     |                         | 2   | 2112 | 2112 | 2397 | 8    | 2116 | 2681 | 296 |
|                                                                                                                     | gnl BL_ORD_ID 6925                                                                                                  | cb781_c19/f1p1/2021     |     |      |      |      |      |      |      |     |
| isoform=cb781_c2;full_length_coverage=3;non_full_length_coverage=0;isoform_length=1827;expected_accuracy=0.995      | isoform=cb781_c19;full_length_coverage=1;non_full_length_coverage=0;isoform_length=2021;expected_accuracy=0.995     |                         | 1   | 1243 | 1243 | 1827 | 5    | 124  | 1351 | 193 |
|                                                                                                                     |                                                                                                                     |                         |     |      |      |      |      | 6    |      | 5   |

|                                                            |                                                                                                                                                                                           |     |      |      |      |      |      |      |     |   |  |  |
|------------------------------------------------------------|-------------------------------------------------------------------------------------------------------------------------------------------------------------------------------------------|-----|------|------|------|------|------|------|-----|---|--|--|
| gth_coverage=0;isoform_length=1827;expected_accuracy=0.999 | ngth_coverage=1;isoform_length=2021;expected_accuracy=0.998                                                                                                                               |     |      |      |      |      |      |      |     |   |  |  |
| cb5125_c34/f1p0/1890                                       | gnl BL_ORD_ID 43457                      cb5125_c11/f2p1/2545<br>isoform=cb5125_c11;full_length_coverage=2;non_full_length_coverage=1;isoform_length=2545;expected_accuracy=1.000         | 1   | 1145 | 1144 | 1780 | 46   | 1187 | 1823 | 245 | 8 |  |  |
| cb15533_c11/f1p0/1222                                      | gnl BL_ORD_ID 10970                      cb8564_c115643/f1p0/1910<br>isoform=cb15533_c11;full_length_coverage=1;non_full_length_coverage=0;isoform_length=1222;expected_accuracy=0.995    | 9   | 610  | 606  | 1211 | 1    | 606  | 1288 | 187 | 3 |  |  |
| cb322_c15/f1p0/3487                                        | gnl BL_ORD_ID 41025                      cb322_c8/f2p0/3977<br>isoform=cb322_c15;full_length_coverage=1;non_full_length_coverage=0;isoform_length=3487;expected_accuracy=0.997            | 1   | 2729 | 2728 | 3486 | 2    | 2728 | 3218 | 397 | 7 |  |  |
| cb2737_c55/f1p1/2936                                       | gnl BL_ORD_ID 68786                      cb2737_c50/f1p0/3706<br>isoform=cb2737_c55;full_length_coverage=1;non_full_length_coverage=1;isoform_length=2936;expected_accuracy=1.000         | 1   | 1595 | 1593 | 2936 | 491  | 2082 | 2214 | 355 | 1 |  |  |
| cb8564_c119767/f1p0/1892                                   | gnl BL_ORD_ID 10350                      cb8564_c108942/f5p0/2520<br>isoform=cb8564_c108942;full_length_coverage=5;non_full_length_coverage=0;isoform_length=2520;expected_accuracy=1.000 | 186 | 1885 | 5    | 189  | 826  | 2490 | 11   | 194 |   |  |  |
| cb7085_c12/f1p0/1968                                       | gnl BL_ORD_ID 4154                      cb7085_c8/f1p0/2701<br>isoform=cb7085_c8;full_length_coverage=1;non_full_length_coverage=0;isoform_length=2701;expected_accuracy=0.996            | 542 | 1894 | 61   | 544  | 1349 | 2701 | 1    | 483 |   |  |  |

|                                                                                                                                                  |                                                                                                                                                                         |     |      |      |      |     |          |      |          |
|--------------------------------------------------------------------------------------------------------------------------------------------------|-------------------------------------------------------------------------------------------------------------------------------------------------------------------------|-----|------|------|------|-----|----------|------|----------|
| cb1333_c101/f1p0/1395<br>isoform=cb1333_c101;full_length_coverage=1;non_full_length_coverage=0;isoform_length=1395;expected_accuracy=0.997       | gnl BL_ORD_ID 61255 cb1333_c94/f1p0/1764                                                                                                                                | 149 | 1395 | 27   | 147  | 503 | 174<br>7 | 32   | 152      |
| cb8564_c146882/f3p8/4113<br>isoform=cb8564_c146882;full_length_coverage=3;non_full_length_coverage=8;isoform_length=4113;expected_accuracy=0.998 | gnl BL_ORD_ID 16628      cb8564_c47737/f7p5/4351<br>isoform=cb8564_c47737;full_length_coverage=7;non_full_length_coverage=5;isoform_length=4351;expected_accuracy=0.998 | 184 | 4063 | 1    | 185  | 395 | 427<br>4 | 1    | 178      |
| cb4016_c42/f1p1/2580<br>isoform=cb4016_c42;full_length_coverage=1;non_full_length_coverage=1;isoform_length=2580;expected_accuracy=0.993         | gnl BL_ORD_ID 40901      cb4016_c19/f1p0/2644<br>isoform=cb4016_c19;full_length_coverage=1;non_full_length_coverage=0;isoform_length=2644;expected_accuracy=0.995       | 139 | 2494 | 1    | 143  | 284 | 264<br>4 | 1    | 140      |
| cb4685_c6/f1p0/3026<br>isoform=cb4685_c6;full_length_coverage=1;non_full_length_coverage=0;isoform_length=3026;expected_accuracy=0.999           | gnl BL_ORD_ID 42751      cb4685_c2/f1p0/3259<br>isoform=cb4685_c2;full_length_coverage=1;non_full_length_coverage=0;isoform_length=3259;expected_accuracy=0.995         | 1   | 1918 | 1917 | 2998 | 52  | 197<br>3 | 2139 | 321<br>5 |
| cb8564_c47522/f1p0/2954                                                                                                                          | gnl BL_ORD_ID 18852      cb8564_c84488/f1p0/3408<br>isoform=cb8564_c84488;full_length_coverage=1;non_full_length_coverage=0;isoform_length=3408;expected_accuracy=0.996 | 226 | 2845 | 1    | 226  | 790 | 340<br>8 | 1    | 217      |
| cb10141_c13/f24p1/1070<br>isoform=cb10141_c13;full_length_coverage=24;non_full_length_coverage=1;isoform_length=1070;expected_accuracy=1.000     | gnl BL_ORD_ID 48121 cb10141_c5/f1p0/1325                                                                                                                                | 416 | 1070 | 5    | 419  | 519 | 1173     | 1    | 415      |
| cb8564_c36056/f1p0/2652<br>isoform=cb8564_c36056;full_length_coverage=1;non_f                                                                    | gnl BL_ORD_ID 15154      cb8564_c32509/f1p1/2880<br>isoform=cb8564_c32509;full_length_coverage=1;non_f                                                                  | 248 | 2626 | 1    | 251  | 465 | 287<br>7 | 61   | 320      |

|                                                                                                                                                  |                                                                                                                                                                                           |     |      |      |      |     |          |      |          |
|--------------------------------------------------------------------------------------------------------------------------------------------------|-------------------------------------------------------------------------------------------------------------------------------------------------------------------------------------------|-----|------|------|------|-----|----------|------|----------|
| ull_length_coverage=0;isoform_length=2652;expected_accuracy=0.999                                                                                | ll_length_coverage=1;isoform_length=2880;expected_accuracy=0.991                                                                                                                          |     |      |      |      |     |          |      |          |
| cb1729_c18/f1p0/3891                                                                                                                             | gnl BL_ORD_ID 31731                      cb1729_c6/f2p2/3867<br>isoform=cb1729_c6;full_length_coverage=2;non_full_length_coverage=2;isoform_length=3867;expected_accuracy=0.996           | 282 | 3769 | 2    | 282  | 384 | 386<br>7 | 1    | 281      |
| cb8564_c146124/f7p1/2108<br>isoform=cb8564_c146124;full_length_coverage=7;non_full_length_coverage=1;isoform_length=2108;expected_accuracy=1.000 | gnl BL_ORD_ID 12361                      cb8564_c1392/f1p1/3024<br>isoform=cb8564_c1392;full_length_coverage=1;non_full_length_coverage=1;isoform_length=3024;expected_accuracy=0.993     | 1   | 1515 | 1515 | 2106 | 53  | 156<br>2 | 2433 | 302<br>4 |
| cb8564_c41756/f1p0/2738<br>isoform=cb8564_c41756;full_length_coverage=1;non_full_length_coverage=0;isoform_length=2738;expected_accuracy=0.996   | gnl BL_ORD_ID 55359   cb8564_c39546/f1p2/3023                                                                                                                                             | 1   | 2173 | 2170 | 2738 | 1   | 214<br>8 | 2271 | 283<br>9 |
| cb8564_c43399/f1p0/2654<br>isoform=cb8564_c43399;full_length_coverage=1;non_full_length_coverage=0;isoform_length=2654;expected_accuracy=0.999   | gnl BL_ORD_ID 17164                      cb8564_c90856/f1p11/2858<br>isoform=cb8564_c90856;full_length_coverage=1;non_full_length_coverage=11;isoform_length=2858;expected_accuracy=0.999 | 23  | 2367 | 2363 | 2651 | 35  | 235<br>5 | 2572 | 285<br>8 |
| cb8564_c36731/f1p2/2761                                                                                                                          | gnl BL_ORD_ID 14091                      cb8564_c43119/f1p4/3194<br>isoform=cb8564_c43119;full_length_coverage=1;non_full_length_coverage=4;isoform_length=3194;expected_accuracy=0.995   | 1   | 1977 | 1972 | 2698 | 1   | 199<br>2 | 2424 | 315<br>7 |
| cb693_c8/f1p0/2842<br>isoform=cb693_c8;full_length_coverage=1;non_full_length_coverage=0;isoform_length=2842;expected_accuracy=0.993             | gnl BL_ORD_ID 4971                      cb693_c3/f1p0/3671<br>isoform=cb693_c3;full_length_coverage=1;non_full_length_coverage=0;isoform_length=3671;expected_accuracy=0.995              | 1   | 2466 | 2462 | 2840 | 3   | 244<br>8 | 3296 | 367<br>1 |

|                                                                                                                                             |                                             |     |      |      |      |      |          |      |          |
|---------------------------------------------------------------------------------------------------------------------------------------------|---------------------------------------------|-----|------|------|------|------|----------|------|----------|
| cb2071_c7/f1p0/2109<br>isoform=cb2071_c7;full_length_coverage=1;non_full_length_coverage=0;isoform_length=2109;expected_accuracy=1.000      | gnl BL_ORD_ID 66664 cb2071_c6/f1p0/4059     | 1   | 1150 | 1145 | 2051 | 7    | 1158     | 3156 | 406<br>1 |
| cb5583_c2/f1p0/2107<br>isoform=cb5583_c1;full_length_coverage=1;non_full_length_coverage=0;isoform_length=3059;expected_accuracy=0.997      | gnl BL_ORD_ID 46284 cb5583_c1/f1p0/3059     | 132 | 2060 | 1    | 137  | 1127 | 305<br>1 | 1    | 138      |
| cb4030_c0/f2p0/2589<br>isoform=cb4030_c0;full_length_coverage=2;non_full_length_coverage=0;isoform_length=2589;expected_accuracy=0.999      | gnl BL_ORD_ID 71738 cb4030_c1/f1p0/3459     | 1   | 1555 | 1556 | 2589 | 16   | 155<br>1 | 2331 | 336<br>5 |
| cb3061_c8/f1p0/2430<br>isoform=cb3061_c8;full_length_coverage=1;non_full_length_coverage=0;isoform_length=2430;expected_accuracy=0.999      | gnl BL_ORD_ID 69090 cb3061_c19/f1p0/3233    | 197 | 2429 | 1    | 199  | 871  | 310<br>5 | 7    | 205      |
| cb8564_c38035/f1p0/2770<br>isoform=cb6980_c16;full_length_coverage=1;non_full_length_coverage=0;isoform_length=2284;expected_accuracy=1.000 | gnl BL_ORD_ID 55986 cb8564_c51172/f1p0/3367 | 2   | 2035 | 2033 | 2756 | 7    | 205<br>9 | 2249 | 297<br>3 |
| cb6980_c16/f1p0/2284<br>isoform=cb6980_c7;full_length_coverage=4;non_full_length_coverage=0;isoform_length=2478;expected_accuracy=0.998     | gnl BL_ORD_ID 4579 cb6980_c7/f4p1/2478      | 1   | 1987 | 1982 | 2284 | 18   | 200<br>6 | 2130 | 243<br>2 |
| cb6622_c0/f8p0/2284<br>isoform=cb6622_c4;full_length_coverage=1;non_full_length_coverage=0;isoform_length=2808;expected_accuracy=1.000      | gnl BL_ORD_ID 3916 cb6622_c4/f1p0/2808      | 175 | 2249 | 1    | 177  | 734  | 280<br>8 | 17   | 195      |



|                                                                                                                                                |                                                                                                                                                              |      |      |      |      |      |     |      |      |
|------------------------------------------------------------------------------------------------------------------------------------------------|--------------------------------------------------------------------------------------------------------------------------------------------------------------|------|------|------|------|------|-----|------|------|
| cb11723_c0/f1p0/1808                                                                                                                           | gnl BL_ORD_ID 60342 cb11723_c1/f1p0/2354                                                                                                                     | 1    | 1303 | 1302 | 1751 | 21   | 132 | 1557 | 200  |
|                                                                                                                                                |                                                                                                                                                              |      |      |      |      |      | 3   |      | 6    |
| cb8564_c36056/f1p0/2652<br>isoform=cb8564_c36056;full_length_coverage=1;non_full_length_coverage=0;isoform_length=2652;expected_accuracy=0.999 | gnl BL_ORD_ID 54403 cb8564_c35093/f1p5/2916                                                                                                                  | 248  | 2651 | 1    | 251  | 482  | 288 | 88   | 338  |
|                                                                                                                                                |                                                                                                                                                              |      |      |      |      |      | 5   |      |      |
| cb8564_c43779/f1p0/3021<br>isoform=cb8564_c43779;full_length_coverage=1;non_full_length_coverage=0;isoform_length=3021;expected_accuracy=0.993 | gnl BL_ORD_ID 57017 cb8564_c80370/f1p0/3493                                                                                                                  | 118  | 2344 | 2345 | 3021 | 3085 | 860 | 704  | 29   |
|                                                                                                                                                |                                                                                                                                                              |      |      |      |      |      |     |      |      |
| cb4698_c32/f1p0/3247                                                                                                                           | gnl BL_ORD_ID 42963 cb4698_c11/f1p0/3141<br>isoform=cb4698_c11;full_length_coverage=1;non_full_length_coverage=0;isoform_length=3141;expected_accuracy=1.000 | 1398 | 3115 | 124  | 1398 | 1427 | 314 | 1    | 127  |
|                                                                                                                                                |                                                                                                                                                              |      |      |      |      |      | 1   |      | 2    |
| cb6956_c12/f1p0/2437                                                                                                                           | gnl BL_ORD_ID 5805 cb6956_c6/f1p0/2394<br>isoform=cb6956_c6;full_length_coverage=1;non_full_length_coverage=0;isoform_length=2394;expected_accuracy=0.992    | 410  | 2255 | 6    | 409  | 555  | 239 | 1    | 403  |
|                                                                                                                                                |                                                                                                                                                              |      |      |      |      |      | 4   |      |      |
| cb1404_c8/f1p0/2908<br>isoform=cb1404_c8;full_length_coverage=1;non_full_length_coverage=0;isoform_length=2908;expected_accuracy=0.996         | gnl BL_ORD_ID 26460 cb1404_c7/f1p0/3636<br>isoform=cb1404_c7;full_length_coverage=1;non_full_length_coverage=0;isoform_length=3636;expected_accuracy=0.997   | 1    | 2543 | 2539 | 2907 | 58   | 257 | 3269 | 363  |
|                                                                                                                                                |                                                                                                                                                              |      |      |      |      |      | 5   |      | 6    |
| cb9788_c16/f1p0/3980                                                                                                                           | gnl BL_ORD_ID 58891 cb9788_c18/f1p0/3674                                                                                                                     | 1253 | 3583 | 117  | 1253 | 1257 | 358 | 1    | 1137 |
|                                                                                                                                                |                                                                                                                                                              |      |      |      |      |      | 7   |      |      |
| cb8564_c71716/f1p0/3226                                                                                                                        | gnl BL_ORD_ID 54396 cb8564_c23546/f1p0/4263                                                                                                                  | 1    | 2398 | 2398 | 3133 | 1    | 240 | 2731 | 346  |
|                                                                                                                                                |                                                                                                                                                              |      |      |      |      |      | 5   |      | 6    |

|                                                                                                                                                |                                                                                                                                                                  |     |      |      |      |     |          |      |          |
|------------------------------------------------------------------------------------------------------------------------------------------------|------------------------------------------------------------------------------------------------------------------------------------------------------------------|-----|------|------|------|-----|----------|------|----------|
| cb16680_c6/f1p0/1706<br>isoform=cb16680_c6;full_length_coverage=1;non_full_length_coverage=0;isoform_length=1706;expected_accuracy=0.997       | gnl BL_ORD_ID 53383 cb8564_c123815/f1p0/2326                                                                                                                     | 150 | 1706 | 1    | 154  | 537 | 209<br>3 | 51   | 204      |
| cb56_c2/f1p0/5001                                                                                                                              | gnl BL_ORD_ID 45012 cb56_c5/f1p0/4943<br>isoform=cb56_c5;full_length_coverage=1;non_full_length_coverage=0;isoform_length=4943;expected_accuracy=0.999           | 1   | 3926 | 3925 | 4635 | 167 | 4110     | 4233 | 494<br>3 |
| cb7254_c5/f1p0/1881                                                                                                                            | gnl BL_ORD_ID 7211 cb7254_c7/f1p0/2281<br>isoform=cb7254_c7;full_length_coverage=1;non_full_length_coverage=0;isoform_length=2281;expected_accuracy=0.994        | 126 | 1759 | 1    | 125  | 242 | 188<br>0 | 3    | 127      |
| cb1279_c10/f2p0/2859<br>isoform=cb1279_c10;full_length_coverage=2;non_full_length_coverage=0;isoform_length=2859;expected_accuracy=0.999       | gnl BL_ORD_ID 27065 cb1279_c46/f1p3/3121<br>isoform=cb1279_c46;full_length_coverage=1;non_full_length_coverage=3;isoform_length=3121;expected_accuracy=1.000     | 202 | 2859 | 1    | 203  | 420 | 307<br>4 | 47   | 245      |
| cb8564_c7674/f6p3/2437<br>isoform=cb8564_c7674;full_length_coverage=6;non_full_length_coverage=3;isoform_length=2437;expected_accuracy=0.995   | gnl BL_ORD_ID 12956 cb8564_c1771/f3p1/3767<br>isoform=cb8564_c1771;full_length_coverage=3;non_full_length_coverage=1;isoform_length=3767;expected_accuracy=0.996 | 1   | 1303 | 1301 | 2424 | 32  | 133<br>4 | 2646 | 376<br>7 |
| cb8564_c41756/f1p0/2738<br>isoform=cb8564_c41756;full_length_coverage=1;non_full_length_coverage=0;isoform_length=2738;expected_accuracy=0.996 | gnl BL_ORD_ID 56036 cb8564_c52952/f1p0/3129                                                                                                                      | 14  | 2173 | 2170 | 2737 | 22  | 216<br>2 | 2285 | 285<br>1 |
| cb8349_c32/f1p0/2256<br>isoform=cb8349_c32;full_length_coverage=1;non_full                                                                     | gnl BL_ORD_ID 52487 cb8349_c29/f1p0/2734                                                                                                                         | 1   | 1525 | 1525 | 2161 | 3   | 152<br>7 | 1749 | 238<br>4 |

|                                                                                                                     |                                                                                                                  |                         |      |      |      |      |      |     |      |     |
|---------------------------------------------------------------------------------------------------------------------|------------------------------------------------------------------------------------------------------------------|-------------------------|------|------|------|------|------|-----|------|-----|
| length_coverage=0;isoform_length=2256;expected_accuracy=0.994                                                       |                                                                                                                  |                         |      |      |      |      |      |     |      |     |
| cb6032_c13/f1p2/1975                                                                                                | gnl BL_ORD_ID 46085                                                                                              | cb6032_c14/f1p2/2142    |      |      |      |      |      |     |      |     |
| isoform=cb6032_c13;full_length_coverage=1;non_full_length_coverage=2;isoform_length=1975;expected_accuracy=0.991    | isoform=cb6032_c14;full_length_coverage=1;non_full_length_coverage=2;isoform_length=2142;expected_accuracy=0.996 |                         | 1    | 1184 | 1181 | 1974 | 16   | 120 | 1347 | 214 |
|                                                                                                                     |                                                                                                                  |                         |      |      |      |      |      | 2   |      | 2   |
| cb8564_c38035/f1p0/2770                                                                                             | gnl BL_ORD_ID 55291                                                                                              | cb8564_c37409/f1p0/3153 | 1    | 2035 | 2033 | 2754 | 1    | 203 | 2222 | 294 |
|                                                                                                                     |                                                                                                                  |                         |      |      |      |      |      | 2   |      | 8   |
| cb2640_c12/f1p0/3046                                                                                                | gnl BL_ORD_ID 68659                                                                                              | cb2640_c11/f1p0/3319    | 192  | 3046 | 1    | 193  | 459  | 331 | 8    | 225 |
| isoform=cb2640_c12;full_length_coverage=1;non_full_length_coverage=0;isoform_length=3046;expected_accuracy=0.994    |                                                                                                                  |                         |      |      |      |      |      | 0   |      |     |
| cb3143_c17/f1p0/2870                                                                                                | gnl BL_ORD_ID 69160                                                                                              | cb3143_c4/f1p0/3643     | 160  | 2870 | 1    | 163  | 685  | 338 | 9    | 171 |
| isoform=cb3143_c17;full_length_coverage=1;non_full_length_coverage=0;isoform_length=2870;expected_accuracy=0.993    |                                                                                                                  |                         |      |      |      |      |      | 9   |      |     |
| cb8564_c18383/f1p1/3801                                                                                             | gnl BL_ORD_ID 53917                                                                                              | cb8564_c14852/f1p0/4493 | 1672 | 3784 | 1    | 1668 | 1808 | 393 | 16   | 167 |
| isoform=cb8564_c18383;full_length_coverage=1;non_full_length_coverage=1;isoform_length=3801;expected_accuracy=0.990 |                                                                                                                  |                         |      |      |      |      |      | 3   |      | 1   |
| cb947_c19/f1p1/2164                                                                                                 | gnl BL_ORD_ID 21933                                                                                              | cb947_c14/f1p0/4429     |      |      |      |      |      |     |      |     |
| isoform=cb947_c19;full_length_coverage=1;non_full_length_coverage=1;isoform_length=2164;expected_accuracy=1.000     | isoform=cb947_c14;full_length_coverage=1;non_full_length_coverage=0;isoform_length=4429;expected_accuracy=0.998  |                         | 1    | 1312 | 1308 | 2161 | 7    | 130 | 3575 | 442 |
|                                                                                                                     |                                                                                                                  |                         |      |      |      |      |      | 9   |      | 3   |
| cb2145_c12/f1p0/2110                                                                                                | gnl BL_ORD_ID 66745                                                                                              | cb2145_c2/f1p0/4035     | 698  | 2110 | 91   | 697  | 2482 | 388 | 1    | 607 |
| isoform=cb2145_c12;full_length_coverage=1;non_full_length_coverage=0;isoform_length=2110;expected_accuracy=0.994    |                                                                                                                  |                         |      |      |      |      |      | 7   |      |     |

|                                                                                                                     |                                                                                                                      |                          |     |      |      |      |     |      |      |      |
|---------------------------------------------------------------------------------------------------------------------|----------------------------------------------------------------------------------------------------------------------|--------------------------|-----|------|------|------|-----|------|------|------|
| length_coverage=0;isoform_length=2110;expected_accuracy=0.995                                                       |                                                                                                                      |                          |     |      |      |      |     |      |      |      |
| cb8564_c90372/f1p0/2157                                                                                             | gnl BL_ORD_ID 15904                                                                                                  | cb8564_c69373/f4p3/2436  |     |      |      |      |     |      |      |      |
| isoform=cb8564_c90372;full_length_coverage=1;non_full_length_coverage=0;isoform_length=2157;expected_accuracy=0.994 | isoform=cb8564_c69373;full_length_coverage=4;non_full_length_coverage=3;isoform_length=2436;expected_accuracy=1.000  |                          | 1   | 1092 | 1088 | 2157 | 101 | 1193 | 1364 | 2434 |
| cb3678_c20/f11p0/3156                                                                                               | gnl BL_ORD_ID 71438                                                                                                  | cb3678_c4/f1p0/3559      |     |      |      |      |     |      |      |      |
| isoform=cb3678_c20;full_length_coverage=11;non_full_length_coverage=0;isoform_length=3156;expected_accuracy=1.000   |                                                                                                                      |                          | 493 | 3156 | 9    | 496  | 607 | 3270 | 4    | 478  |
| cb8564_c71725/f1p0/3227                                                                                             | gnl BL_ORD_ID 15727                                                                                                  | cb8564_c69026/f2p1/3011  |     |      |      |      |     |      |      |      |
|                                                                                                                     | isoform=cb8564_c69026;full_length_coverage=2;non_full_length_coverage=1;isoform_length=3011;expected_accuracy=0.999  |                          | 10  | 1551 | 1548 | 2615 | 1   | 1534 | 1936 | 3002 |
| cb9815_c3/f1p0/1942                                                                                                 | gnl BL_ORD_ID 21400                                                                                                  | cb9815_c2/f1p0/2812      |     |      |      |      |     |      |      |      |
| isoform=cb9815_c3;full_length_coverage=1;non_full_length_coverage=0;isoform_length=1942;expected_accuracy=0.993     | isoform=cb9815_c2;full_length_coverage=1;non_full_length_coverage=0;isoform_length=2812;expected_accuracy=1.000      |                          | 1   | 1678 | 1677 | 1942 | 10  | 1702 | 1926 | 2187 |
| cb454_c23/f1p0/2557                                                                                                 | gnl BL_ORD_ID 42150                                                                                                  | cb454_c1/f3p0/2382       |     |      |      |      |     |      |      |      |
|                                                                                                                     | isoform=cb454_c1;full_length_coverage=3;non_full_length_coverage=0;isoform_length=2382;expected_accuracy=1.000       |                          | 242 | 2295 | 53   | 241  | 296 | 2350 | 1    | 189  |
| cb8564_c88311/f1p1/2475                                                                                             | gnl BL_ORD_ID 15376                                                                                                  | cb8564_c31588/f10p3/3394 |     |      |      |      |     |      |      |      |
| isoform=cb8564_c88311;full_length_coverage=1;non_full_length_coverage=1;isoform_length=2475;expected_accuracy=0.993 | isoform=cb8564_c31588;full_length_coverage=10;non_full_length_coverage=3;isoform_length=3394;expected_accuracy=1.000 |                          | 1   | 1814 | 1812 | 2473 | 215 | 2036 | 2727 | 3388 |

|                         |                                                                                                                                                                          |     |      |      |      |     |      |      |      |
|-------------------------|--------------------------------------------------------------------------------------------------------------------------------------------------------------------------|-----|------|------|------|-----|------|------|------|
| cb1178_c29/f1p0/1155    | gnl BL_ORD_ID 23776      cb1178_c19/f1p0/1460<br>isoform=cb1178_c19;full_length_coverage=1;non_full_length_coverage=0;isoform_length=1460;expected_accuracy=1.000        | 117 | 1167 | 1    | 116  | 297 | 1347 | 61   | 176  |
| cb8564_c36731/f1p2/2761 | gnl BL_ORD_ID 16447      cb8564_c47202/f1p0/3195<br>isoform=cb8564_c47202;full_length_coverage=1;non_full_length_coverage=0;isoform_length=3195;expected_accuracy=0.996  | 1   | 1977 | 1972 | 2735 | 1   | 1980 | 2409 | 3195 |
| cb12586_c4/f1p0/1346    | gnl BL_ORD_ID 23754      cb12586_c0/f2p0/1428<br>isoform=cb12586_c0;full_length_coverage=2;non_full_length_coverage=0;isoform_length=1428;expected_accuracy=0.996        | 398 | 1332 | 4    | 398  | 494 | 1428 | 1    | 390  |
| cb3763_c48/f1p0/3166    | gnl BL_ORD_ID 39926      cb3763_c51/f1p1/2991<br>isoform=cb3763_c51;full_length_coverage=1;non_full_length_coverage=1;isoform_length=2991;expected_accuracy=0.999        | 371 | 2909 | 41   | 372  | 453 | 2991 | 6    | 335  |
| cb5874_c15/f1p0/2254    | gnl BL_ORD_ID 74533      cb5874_c16/f1p0/3263                                                                                                                            | 225 | 2249 | 1    | 224  | 875 | 2898 | 452  | 675  |
| cb900_c13/f1p0/2723     | gnl BL_ORD_ID 20993      cb900_c14/f1p0/3179<br>isoform=cb900_c14;full_length_coverage=1;non_full_length_coverage=0;isoform_length=3179;expected_accuracy=0.994          | 1   | 1488 | 1488 | 2517 | 102 | 1598 | 2130 | 3161 |
| cb8564_c15996/f1p5/3083 | gnl BL_ORD_ID 19212      cb8564_c85033/f2p16/3336<br>isoform=cb8564_c15996;full_length_coverage=1;non_full_length_coverage=5;isoform_length=3083;expected_accuracy=0.993 | 323 | 3083 | 6    | 328  | 469 | 3227 | 7    | 328  |

|                                                                                                                                                |                                                                                                                                                                           |     |      |      |      |      |      |      |      |
|------------------------------------------------------------------------------------------------------------------------------------------------|---------------------------------------------------------------------------------------------------------------------------------------------------------------------------|-----|------|------|------|------|------|------|------|
| cb8564_c88629/f1p0/3306<br>isoform=cb8564_c88629;full_length_coverage=1;non_full_length_coverage=0;isoform_length=3306;expected_accuracy=0.999 | gnl BL_ORD_ID 11744      cb8564_c151271/f2p2/3622<br>isoform=cb8564_c151271;full_length_coverage=2;non_full_length_coverage=2;isoform_length=3622;expected_accuracy=0.991 | 30  | 3122 | 3122 | 3306 | 1    | 3099 | 3281 | 3465 |
| cb8564_c40764/f1p0/2563<br>isoform=cb8564_c40764;full_length_coverage=1;non_full_length_coverage=0;isoform_length=2563;expected_accuracy=0.997 | gnl BL_ORD_ID 57175      cb8564_c85646/f1p0/3480                                                                                                                          | 19  | 2166 | 2162 | 2563 | 106  | 2251 | 2459 | 2860 |
| cb8564_c85288/f1p2/2983<br>isoform=cb8564_c85288;full_length_coverage=1;non_full_length_coverage=2;isoform_length=2983;expected_accuracy=0.999 | gnl BL_ORD_ID 54703      cb8564_c156696/f1p2/3606                                                                                                                         | 1   | 2289 | 2289 | 2983 | 3    | 2297 | 2911 | 3605 |
| cb8564_c1947/f1p0/2439                                                                                                                         | gnl BL_ORD_ID 14046      cb8564_c3803/f4p0/2310<br>isoform=cb8564_c3803;full_length_coverage=4;non_full_length_coverage=0;isoform_length=2310;expected_accuracy=0.999     | 1   | 1972 | 1971 | 2140 | 57   | 2026 | 2137 | 2304 |
| cb8564_c45300/f1p4/3014<br>isoform=cb8564_c45300;full_length_coverage=1;non_full_length_coverage=4;isoform_length=3014;expected_accuracy=0.996 | gnl BL_ORD_ID 56331      cb8564_c74623/f1p1/3530                                                                                                                          | 243 | 3014 | 12   | 246  | 441  | 3214 | 18   | 249  |
| cb415_c43/f1p0/3304<br>isoform=cb415_c43;full_length_coverage=1;non_full_length_coverage=0;isoform_length=3304;expected_accuracy=0.991         | gnl BL_ORD_ID 72139      cb415_c54/f1p0/3859                                                                                                                              | 24  | 2924 | 2922 | 3304 | 129  | 3022 | 3345 | 3739 |
| cb8564_c16829/f1p3/2089<br>isoform=cb8564_c16829;full_length_coverage=1;non_f                                                                  | gnl BL_ORD_ID 14463      cb8564_c25154/f1p5/4276<br>isoform=cb8564_c25154;full_length_coverage=1;non_fu                                                                   | 228 | 2089 | 65   | 229  | 2415 | 4276 | 27   | 189  |

|                                                                                                                                                                                                               |                                                                                                                                                                                                                                                    |     |      |      |      |     |          |      |          |
|---------------------------------------------------------------------------------------------------------------------------------------------------------------------------------------------------------------|----------------------------------------------------------------------------------------------------------------------------------------------------------------------------------------------------------------------------------------------------|-----|------|------|------|-----|----------|------|----------|
| ull_length_coverage=3;isoform_length=2089;expected_accuracy=0.995<br>cb7986_c17/f1p0/2091<br>isoform=cb7986_c17;full_length_coverage=1;non_full_length_coverage=0;isoform_length=2091;expected_accuracy=0.991 | ll_length_coverage=5;isoform_length=4276;expected_accuracy=0.995<br>gnl BL_ORD_ID 6757                      cb7986_c9/f1p0/2279<br>isoform=cb7986_c9;full_length_coverage=1;non_full_length_coverage=0;isoform_length=2279;expected_accuracy=1.000 | 687 | 2046 | 8    | 690  | 935 | 227<br>9 | 41   | 712      |
| cb8564_c23898/f1p1/3652                                                                                                                                                                                       | gnl BL_ORD_ID 14193                      cb8564_c31973/f2p1/4589<br>isoform=cb8564_c31973;full_length_coverage=2;non_full_length_coverage=1;isoform_length=4589;expected_accuracy=0.996                                                            | 10  | 3057 | 3053 | 3624 | 5   | 305<br>5 | 3965 | 454<br>0 |
| cb8564_c3832/f1p0/2033<br>isoform=cb8564_c3832;full_length_coverage=1;non_full_length_coverage=0;isoform_length=2033;expected_accuracy=0.995                                                                  | gnl BL_ORD_ID 13992                      cb8564_c3828/f5p1/2269<br>isoform=cb8564_c3828;full_length_coverage=5;non_full_length_coverage=1;isoform_length=2269;expected_accuracy=1.000                                                              | 1   | 1611 | 1610 | 2022 | 143 | 175<br>4 | 1855 | 226<br>9 |
| cb8564_c92199/f1p0/2079                                                                                                                                                                                       | gnl BL_ORD_ID 17306                      cb8564_c78972/f1p0/2676<br>isoform=cb8564_c78972;full_length_coverage=1;non_full_length_coverage=0;isoform_length=2676;expected_accuracy=0.997                                                            | 1   | 1795 | 1794 | 2063 | 33  | 182<br>7 | 2346 | 261<br>5 |
| cb8564_c36056/f1p0/2652<br>isoform=cb8564_c36056;full_length_coverage=1;non_full_length_coverage=0;isoform_length=2652;expected_accuracy=0.999                                                                | gnl BL_ORD_ID 56005                      cb8564_c51803/f1p0/3354                                                                                                                                                                                   | 248 | 2524 | 1    | 251  | 480 | 275<br>8 | 86   | 336      |
| cb1667_c7/f1p0/2596<br>isoform=cb1667_c7;full_length_coverage=1;non_full_length_coverage=0;isoform_length=2596;expected_accuracy=0.995                                                                        | gnl BL_ORD_ID 32659                      cb1667_c5/f1p0/2649<br>isoform=cb1667_c5;full_length_coverage=1;non_full_length_coverage=0;isoform_length=2649;expected_accuracy=0.996                                                                    | 1   | 1719 | 1718 | 2511 | 5   | 172<br>1 | 1855 | 264<br>9 |

|                                                                                                                                                  |                                                                                                                                                                                           |     |      |      |      |     |          |      |          |
|--------------------------------------------------------------------------------------------------------------------------------------------------|-------------------------------------------------------------------------------------------------------------------------------------------------------------------------------------------|-----|------|------|------|-----|----------|------|----------|
| cb8564_c80085/f1p0/3315                                                                                                                          | gnl BL_ORD_ID 58199 cb8564_c91279/f1p0/3567                                                                                                                                               | 525 | 2979 | 81   | 524  | 749 | 320<br>3 | 64   | 508      |
| cb4902_c20/f5p1/2187<br>isoform=cb4902_c20;full_length_coverage=5;non_full_length_coverage=1;isoform_length=2187;expected_accuracy=0.999         | gnl BL_ORD_ID 43250                      cb4902_c11/f1p1/2252<br>isoform=cb4902_c11;full_length_coverage=1;non_full_length_coverage=1;isoform_length=2252;expected_accuracy=0.994         | 332 | 2187 | 45   | 334  | 396 | 225<br>2 | 1    | 291      |
| cb8564_c43119/f1p4/3194<br>isoform=cb8564_c43119;full_length_coverage=1;non_full_length_coverage=4;isoform_length=3194;expected_accuracy=0.995   | gnl BL_ORD_ID 55939 cb8564_c49630/f1p4/3487                                                                                                                                               | 2   | 2937 | 2937 | 3157 | 1   | 291<br>3 | 3243 | 346<br>3 |
| cb4397_c4/f1p0/2292<br>isoform=cb4397_c4;full_length_coverage=1;non_full_length_coverage=0;isoform_length=2292;expected_accuracy=0.995           | gnl BL_ORD_ID 42920                      cb4397_c2/f1p0/3361<br>isoform=cb4397_c2;full_length_coverage=1;non_full_length_coverage=0;isoform_length=3361;expected_accuracy=0.993           | 1   | 1829 | 1824 | 2215 | 988 | 281<br>5 | 2969 | 336<br>1 |
| cb8564_c49356/f1p0/3133                                                                                                                          | gnl BL_ORD_ID 14410                      cb8564_c44256/f1p1/3267<br>isoform=cb8564_c44256;full_length_coverage=1;non_full_length_coverage=1;isoform_length=3267;expected_accuracy=0.995   | 1   | 2137 | 2133 | 2848 | 1   | 2119     | 2553 | 326<br>7 |
| cb7533_c13/f1p0/2022<br>isoform=cb7533_c13;full_length_coverage=1;non_full_length_coverage=0;isoform_length=2022;expected_accuracy=0.995         | gnl BL_ORD_ID 51319 cb7533_c5/f1p0/2459                                                                                                                                                   | 149 | 2021 | 1    | 151  | 447 | 232<br>1 | 63   | 213      |
| cb8564_c147548/f5p1/3243<br>isoform=cb8564_c147548;full_length_coverage=5;non_full_length_coverage=1;isoform_length=3243;expected_accuracy=0.996 | gnl BL_ORD_ID 12106                      cb8564_c146659/f3p0/3534<br>isoform=cb8564_c146659;full_length_coverage=3;non_full_length_coverage=0;isoform_length=3534;expected_accuracy=0.998 | 2   | 2039 | 2037 | 3243 | 52  | 209<br>5 | 2324 | 353<br>4 |



|                                                                                                                                                |                                                                                                                                                                         |     |      |      |      |      |          |      |          |
|------------------------------------------------------------------------------------------------------------------------------------------------|-------------------------------------------------------------------------------------------------------------------------------------------------------------------------|-----|------|------|------|------|----------|------|----------|
| cb10299_c1/f3p0/1233<br>isoform=cb10299_c1;full_length_coverage=3;non_full_length_coverage=0;isoform_length=1233;expected_accuracy=1.000       | gnl BL_ORD_ID 48353 cb10299_c7/f1p0/3268                                                                                                                                | 101 | 1233 | 1    | 104  | 2035 | 316<br>7 | 4    | 107      |
| cb8564_c91776/f1p2/2099                                                                                                                        | gnl BL_ORD_ID 57982 cb8564_c85904/f1p1/2015                                                                                                                             | 165 | 1834 | 12   | 164  | 301  | 197<br>0 | 1    | 151      |
| cb8564_c73853/f1p0/2443<br>isoform=cb8564_c73853;full_length_coverage=1;non_full_length_coverage=0;isoform_length=2443;expected_accuracy=1.000 | gnl BL_ORD_ID 57186 cb8564_c85953/f1p0/2986                                                                                                                             | 1   | 1281 | 1276 | 2428 | 1    | 128<br>1 | 1561 | 271<br>6 |
| cb8564_c40598/f1p4/3119                                                                                                                        | gnl BL_ORD_ID 15169      cb8564_c40218/f1p0/3146<br>isoform=cb8564_c40218;full_length_coverage=1;non_full_length_coverage=0;isoform_length=3146;expected_accuracy=0.993 | 1   | 2732 | 2729 | 3049 | 4    | 271<br>2 | 2831 | 314<br>6 |
| cb5137_c91/f1p0/3100                                                                                                                           | gnl BL_ORD_ID 43804      cb5137_c27/f1p1/2948<br>isoform=cb5137_c27;full_length_coverage=1;non_full_length_coverage=1;isoform_length=2948;expected_accuracy=0.991       | 228 | 2800 | 1    | 231  | 377  | 294<br>8 | 4    | 234      |
| cb8564_c42814/f1p0/2151<br>isoform=cb8564_c42814;full_length_coverage=1;non_full_length_coverage=0;isoform_length=2151;expected_accuracy=0.993 | gnl BL_ORD_ID 55413 cb8564_c40978/f1p0/3073                                                                                                                             | 650 | 2151 | 7    | 652  | 1344 | 284<br>7 | 1    | 656      |
| cb8564_c33962/f2p1/3330<br>isoform=cb8564_c33962;full_length_coverage=2;non_full_length_coverage=1;isoform_length=3330;expected_accuracy=1.000 | gnl BL_ORD_ID 15223      cb8564_c35037/f1p0/3377<br>isoform=cb8564_c35037;full_length_coverage=1;non_full_length_coverage=0;isoform_length=3377;expected_accuracy=0.996 | 1   | 2746 | 2744 | 3255 | 19   | 276<br>1 | 2866 | 337<br>7 |

|                                                                                                                                        |                                                                                                                                                                           |     |      |      |      |      |      |      |      |
|----------------------------------------------------------------------------------------------------------------------------------------|---------------------------------------------------------------------------------------------------------------------------------------------------------------------------|-----|------|------|------|------|------|------|------|
| cb8564_c15653/f1p4/2475                                                                                                                | gnl BL_ORD_ID 13063      cb8564_c179457/f1p0/2647<br>isoform=cb8564_c179457;full_length_coverage=1;non_full_length_coverage=0;isoform_length=2647;expected_accuracy=1.000 | 22  | 2293 | 2289 | 2435 | 32   | 2282 | 2501 | 2647 |
| cb3887_c13/f1p0/2422                                                                                                                   | gnl BL_ORD_ID 39511      cb3887_c5/f1p0/2830<br>isoform=cb3887_c5;full_length_coverage=1;non_full_length_coverage=0;isoform_length=2830;expected_accuracy=0.996           | 1   | 1827 | 1823 | 2410 | 64   | 1900 | 2239 | 2830 |
| cb8564_c85665/f1p0/3087                                                                                                                | gnl BL_ORD_ID 55920      cb8564_c48949/f1p0/4357                                                                                                                          | 2   | 2300 | 2301 | 2965 | 16   | 2293 | 2847 | 3504 |
| cb10133_c6/f1p1/1304                                                                                                                   | gnl BL_ORD_ID 3296      cb10133_c4/f1p1/1973<br>isoform=cb10133_c4;full_length_coverage=1;non_full_length_coverage=1;isoform_length=1973;expected_accuracy=0.995          | 1   | 1074 | 1070 | 1307 | 441  | 1518 | 1642 | 1879 |
| cb1492_c9/f1p1/2823<br>isoform=cb1492_c9;full_length_coverage=1;non_full_length_coverage=1;isoform_length=2823;expected_accuracy=1.000 | gnl BL_ORD_ID 29081      cb1492_c1/f1p2/4305<br>isoform=cb1492_c1;full_length_coverage=1;non_full_length_coverage=2;isoform_length=4305;expected_accuracy=0.998           | 191 | 2823 | 1    | 196  | 1671 | 4302 | 31   | 226  |
| cb2717_c10/f1p0/2555                                                                                                                   | gnl BL_ORD_ID 38218      cb2717_c3/f1p0/2998<br>isoform=cb2717_c3;full_length_coverage=1;non_full_length_coverage=0;isoform_length=2998;expected_accuracy=0.993           | 1   | 1651 | 1647 | 2454 | 170  | 1816 | 2193 | 2998 |
| cb3101_c20/f1p0/3230                                                                                                                   | gnl BL_ORD_ID 69128      cb3101_c14/f1p0/3479                                                                                                                             | 18  | 1954 | 1950 | 2934 | 3    | 1939 | 2235 | 3219 |
| cb1326_c9/f1p0/3549<br>isoform=cb1326_c9;full_length_coverage=1;non_full_length_coverage=1;isoform_length=3549;expected_accuracy=1.000 | gnl BL_ORD_ID 25378      cb1326_c34/f5p1/4137<br>isoform=cb1326_c34;full_length_coverage=5;non_full_length_coverage=1;isoform_length=4137;expected_accuracy=0.999         | 1   | 3198 | 3194 | 3549 | 272  | 3469 | 3782 | 4137 |

|                                                                                                                                                |                                                                                                                                                                    |     |      |      |      |      |      |      |      |  |  |
|------------------------------------------------------------------------------------------------------------------------------------------------|--------------------------------------------------------------------------------------------------------------------------------------------------------------------|-----|------|------|------|------|------|------|------|--|--|
| ngth_coverage=0;isoform_length=3549;expected_accuracy=0.996                                                                                    | ength_coverage=1;isoform_length=4137;expected_accuracy=1.000                                                                                                       |     |      |      |      |      |      |      |      |  |  |
| cb5183_c115/f1p0/1016                                                                                                                          | gnl BL_ORD_ID 73602 cb5183_c57/f1p0/1810                                                                                                                           | 326 | 1016 | 8    | 330  | 940  | 1630 | 9    | 331  |  |  |
| cb8564_c17933/f1p0/2278<br>isoform=cb8564_c17933;full_length_coverage=1;non_full_length_coverage=0;isoform_length=2278;expected_accuracy=1.000 | gnl BL_ORD_ID 11923 cb8564_c15085/f1p0/2489<br>isoform=cb8564_c15085;full_length_coverage=1;non_full_length_coverage=0;isoform_length=2489;expected_accuracy=0.995 | 1   | 1525 | 1525 | 2278 | 1    | 1541 | 1677 | 2430 |  |  |
| cb8995_c8/f1p0/2000<br>isoform=cb8995_c8;full_length_coverage=1;non_full_length_coverage=0;isoform_length=2000;expected_accuracy=1.000         | gnl BL_ORD_ID 58501 cb8995_c5/f1p0/2524                                                                                                                            | 97  | 2000 | 1    | 100  | 205  | 2109 | 2    | 101  |  |  |
| cb4098_c31/f1p2/3666<br>isoform=cb4098_c31;full_length_coverage=1;non_full_length_coverage=2;isoform_length=3666;expected_accuracy=0.998       | gnl BL_ORD_ID 39575 cb4098_c28/f1p1/4006<br>isoform=cb4098_c28;full_length_coverage=1;non_full_length_coverage=1;isoform_length=4006;expected_accuracy=0.999       | 160 | 2000 | 1999 | 3666 | 17   | 1866 | 2277 | 3961 |  |  |
| cb5896_c26/f1p1/3042<br>isoform=cb5896_c26;full_length_coverage=1;non_full_length_coverage=1;isoform_length=3042;expected_accuracy=0.996       | gnl BL_ORD_ID 74558 cb5896_c23/f1p0/4184                                                                                                                           | 1   | 1672 | 1673 | 2979 | 7    | 1678 | 2860 | 4167 |  |  |
| cb8564_c42506/f1p0/2909                                                                                                                        | gnl BL_ORD_ID 55354 cb8564_c39256/f1p1/3847                                                                                                                        | 1   | 2200 | 2199 | 2852 | 1040 | 3239 | 3112 | 3764 |  |  |
| cb6211_c47/f1p0/2820                                                                                                                           | gnl BL_ORD_ID 3557 cb6211_c55/f1p0/2825<br>isoform=cb6211_c55;full_length_coverage=1;non_full_length_coverage=0;isoform_length=2825;expected_accuracy=0.994        | 395 | 2595 | 54   | 394  | 550  | 2776 | 77   | 422  |  |  |

|                                                                                                                                                |                                                                                                                                            |                         |     |      |      |      |     |      |      |      |
|------------------------------------------------------------------------------------------------------------------------------------------------|--------------------------------------------------------------------------------------------------------------------------------------------|-------------------------|-----|------|------|------|-----|------|------|------|
| cb7076_c17/f1p1/2296<br>isoform=cb7076_c17;full_length_coverage=11;non_full_length_coverage=1;isoform_length=2296;expected_accuracy=0.997      | gnl BL_ORD_ID 4918<br>isoform=cb7076_c8;full_length_coverage=1;non_full_length_coverage=1;isoform_length=2468;expected_accuracy=0.995      | cb7076_c8/f1p1/2468     | 104 | 2254 | 1    | 101  | 317 | 2468 | 11   | 114  |
| cb6063_c19/f1p1/2514                                                                                                                           | gnl BL_ORD_ID 46524<br>isoform=cb6063_c4;full_length_coverage=2;non_full_length_coverage=0;isoform_length=2706;expected_accuracy=0.999     | cb6063_c4/f2p0/2706     | 157 | 2441 | 1    | 156  | 413 | 2690 | 1    | 155  |
| cb18332_c7/f1p2/1609<br>isoform=cb18332_c7;full_length_coverage=1;non_full_length_coverage=2;isoform_length=1609;expected_accuracy=0.995       | gnl BL_ORD_ID 67241<br>cb18332_c6/f1p0/1841                                                                                                |                         | 117 | 1567 | 1    | 117  | 349 | 1800 | 87   | 203  |
| cb13748_c15/f2p0/3413<br>isoform=cb13748_c15;full_length_coverage=2;non_full_length_coverage=0;isoform_length=3413;expected_accuracy=1.000     | gnl BL_ORD_ID 27754<br>isoform=cb13748_c13;full_length_coverage=2;non_full_length_coverage=0;isoform_length=3522;expected_accuracy=0.998   | cb13748_c13/f2p0/3522   | 26  | 3147 | 3143 | 3412 | 1   | 3101 | 3216 | 3490 |
| cb8564_c42654/f1p1/2906<br>isoform=cb8564_c42654;full_length_coverage=1;non_full_length_coverage=1;isoform_length=2906;expected_accuracy=0.990 | gnl BL_ORD_ID 16172<br>isoform=cb8564_c53024;full_length_coverage=1;non_full_length_coverage=0;isoform_length=3159;expected_accuracy=0.996 | cb8564_c53024/f1p0/3159 | 1   | 1706 | 1703 | 2824 | 1   | 1699 | 2017 | 3133 |
| cb8564_c41756/f1p0/2738<br>isoform=cb8564_c41756;full_length_coverage=1;non_full_length_coverage=0;isoform_length=2738;expected_accuracy=0.996 | gnl BL_ORD_ID 15104<br>isoform=cb8564_c37866;full_length_coverage=1;non_full_length_coverage=3;isoform_length=2874;expected_accuracy=0.990 | cb8564_c37866/f1p3/2874 | 1   | 2173 | 2170 | 2738 | 1   | 2173 | 2300 | 2867 |
| cb7940_c54/f1p1/1719<br>isoform=cb7940_c54;full_length_coverage=1;non_full_length_coverage=1;isoform_length=1719;expected_accuracy=0.990       | gnl BL_ORD_ID 8821<br>isoform=cb7940_c58;full_length_coverage=68;non_full_length_coverage=0;isoform_length=1719;expected_accuracy=0.990    | cb7940_c58/f68p1/2037   | 1   | 1366 | 1363 | 1719 | 112 | 1477 | 1673 | 2030 |

|                                                               |                                                                                                                                                                         |     |      |      |      |      |      |      |      |  |
|---------------------------------------------------------------|-------------------------------------------------------------------------------------------------------------------------------------------------------------------------|-----|------|------|------|------|------|------|------|--|
| length_coverage=1;isoform_length=1719;expected_accuracy=0.997 | _length_coverage=1;isoform_length=2037;expected_accuracy=1.000                                                                                                          |     |      |      |      |      |      |      |      |  |
| cb8564_c21138/f1p3/2652                                       | gnl BL_ORD_ID 14058      cb8564_c23936/f1p0/3016<br>isoform=cb8564_c23936;full_length_coverage=1;non_full_length_coverage=0;isoform_length=3016;expected_accuracy=0.995 | 1   | 1710 | 1708 | 2580 | 4    | 1716 | 2143 | 3016 |  |
| cb12983_c7/f1p2/1542                                          | gnl BL_ORD_ID 12784      cb8564_c16498/f2p2/2818<br>isoform=cb12983_c7;full_length_coverage=1;non_full_length_coverage=2;isoform_length=1542;expected_accuracy=0.999    | 239 | 1542 | 73   | 243  | 1360 | 2660 | 411  | 580  |  |
| cb8564_c130391/f1p0/2103                                      | gnl BL_ORD_ID 53375      cb8564_c123599/f1p0/2339                                                                                                                       | 132 | 1996 | 1    | 135  | 436  | 2300 | 1    | 135  |  |
| cb9425_c0/f1p0/2087                                           | gnl BL_ORD_ID 19736      cb9425_c1/f1p0/2223<br>isoform=cb9425_c0;full_length_coverage=1;non_full_length_coverage=0;isoform_length=2087;expected_accuracy=1.000         | 1   | 1614 | 1615 | 2085 | 1    | 1615 | 1754 | 2223 |  |
| cb1960_c41/f1p1/2517                                          | gnl BL_ORD_ID 34968      cb1960_c10/f2p0/3006<br>isoform=cb1960_c10;full_length_coverage=2;non_full_length_coverage=0;isoform_length=3006;expected_accuracy=1.000       | 1   | 2123 | 2120 | 2503 | 30   | 2175 | 2573 | 2956 |  |
| cb3570_c11/f1p0/3198                                          | gnl BL_ORD_ID 39906      cb3570_c7/f1p0/3031<br>isoform=cb3570_c7;full_length_coverage=1;non_full_length_coverage=0;isoform_length=3031;expected_accuracy=0.997         | 239 | 2854 | 20   | 240  | 380  | 2995 | 15   | 233  |  |
| cb2324_c36/f1p1/3463                                          | gnl BL_ORD_ID 36741      cb2324_c5/f2p1/3722<br>isoform=cb2324_c5;full_length_coverage=2;non_full_length_coverage=0;isoform_length=3722;expected_accuracy=0.999         | 100 | 3477 | 1    | 100  | 329  | 3701 | 75   | 174  |  |

|                                                                                                                      |                                                                                                                      |                          |     |      |      |      |     |     |      |     |
|----------------------------------------------------------------------------------------------------------------------|----------------------------------------------------------------------------------------------------------------------|--------------------------|-----|------|------|------|-----|-----|------|-----|
| cb8564_c107332/f9p1/3308                                                                                             | gnl BL_ORD_ID 16917                                                                                                  | cb8564_c48079/f5p1/3512  | 465 | 3308 | 78   | 466  | 499 | 336 | 1    | 358 |
| isoform=cb8564_c107332;full_length_coverage=9;non_full_length_coverage=1;isoform_length=3308;expected_accuracy=0.997 | isoform=cb8564_c48079;full_length_coverage=5;non_full_length_coverage=1;isoform_length=3512;expected_accuracy=0.995  |                          |     |      |      |      |     | 4   |      |     |
| cb8564_c36145/f1p0/2868                                                                                              | gnl BL_ORD_ID 9350                                                                                                   | cb8564_c11826/f1p0/2916  | 1   | 1291 | 1290 | 2653 | 8   | 129 | 1543 | 290 |
|                                                                                                                      | isoform=cb8564_c11826;full_length_coverage=1;non_full_length_coverage=0;isoform_length=2916;expected_accuracy=0.997  |                          |     |      |      |      |     | 6   |      | 8   |
| cb3087_c5/f3p1/2943                                                                                                  | gnl BL_ORD_ID 36601                                                                                                  | cb3087_c18/f1p1/3011     | 16  | 2327 | 2323 | 2834 | 1   | 231 | 2451 | 296 |
| isoform=cb3087_c5;full_length_coverage=3;non_full_length_coverage=1;isoform_length=2943;expected_accuracy=1.000      | isoform=cb3087_c18;full_length_coverage=1;non_full_length_coverage=1;isoform_length=3011;expected_accuracy=1.000     |                          |     |      |      |      |     | 2   |      | 3   |
| cb8564_c122994/f1p1/1940                                                                                             | gnl BL_ORD_ID 11486                                                                                                  | cb8564_c127460/f1p2/2151 | 1   | 1751 | 1748 | 1881 | 126 | 187 | 2018 | 215 |
| isoform=cb8564_c122994;full_length_coverage=1;non_full_length_coverage=1;isoform_length=1940;expected_accuracy=1.000 | isoform=cb8564_c127460;full_length_coverage=1;non_full_length_coverage=2;isoform_length=2151;expected_accuracy=0.998 |                          |     |      |      |      |     | 9   |      | 1   |
| cb8564_c145342/f2p0/2771                                                                                             | gnl BL_ORD_ID 12841                                                                                                  | cb8564_c168338/f2p0/3398 | 441 | 2771 | 5    | 442  | 564 | 288 | 2    | 440 |
| isoform=cb8564_c145342;full_length_coverage=2;non_full_length_coverage=0;isoform_length=2771;expected_accuracy=0.996 | isoform=cb8564_c168338;full_length_coverage=2;non_full_length_coverage=0;isoform_length=3398;expected_accuracy=0.999 |                          |     |      |      |      |     | 9   |      |     |
| cb7214_c10/f1p0/1871                                                                                                 | gnl BL_ORD_ID 51048                                                                                                  | cb7214_c8/f1p0/2224      | 134 | 1809 | 1    | 136  | 288 | 196 | 42   | 177 |
|                                                                                                                      |                                                                                                                      |                          |     |      |      |      |     | 3   |      |     |
| cb13386_c19/f1p0/1632                                                                                                | gnl BL_ORD_ID 21079                                                                                                  | cb9143_c23/f4p0/2041     | 1   | 1390 | 1386 | 1635 | 10  | 139 | 1698 | 194 |
|                                                                                                                      | isoform=cb9143_c23;full_length_coverage=4;non_full_l                                                                 |                          |     |      |      |      |     | 9   |      | 7   |

|                          |                                                                                                                     |                                             |      |      |      |      |      |      |      |      |
|--------------------------|---------------------------------------------------------------------------------------------------------------------|---------------------------------------------|------|------|------|------|------|------|------|------|
|                          | ength_coverage=0;isoform_length=2041;expected_accuracy=0.994                                                        |                                             |      |      |      |      |      |      |      |      |
| cb3013_c7/f1p0/1974      | isoform=cb3013_c7;full_length_coverage=1;non_full_length_coverage=0;isoform_length=1974;expected_accuracy=0.995     | gnl BL_ORD_ID 70137 cb3013_c10/f1p0/3338    | 1    | 1405 | 1404 | 1972 | 37   | 1457 | 2372 | 2940 |
| cb8564_c76927/f1p0/2418  | isoform=cb8564_c76927;full_length_coverage=1;non_full_length_coverage=0;isoform_length=2418;expected_accuracy=0.998 | gnl BL_ORD_ID 16550 cb8564_c68385/f5p0/2739 | 2    | 2014 | 2013 | 2418 | 85   | 2099 | 2334 | 2739 |
| cb1163_c15/f1p3/3725     | isoform=cb1163_c15;full_length_coverage=1;non_full_length_coverage=3;isoform_length=3725;expected_accuracy=0.999    | gnl BL_ORD_ID 23462 cb1163_c14/f1p1/4695    | 1    | 1951 | 1950 | 3616 | 4    | 1955 | 3030 | 4695 |
| cb8564_c43546/f1p1/3276  | isoform=cb8564_c44036;full_length_coverage=1;non_full_length_coverage=0;isoform_length=3258;expected_accuracy=0.992 | gnl BL_ORD_ID 14407 cb8564_c44036/f1p0/3258 | 1179 | 2854 | 10   | 1179 | 1575 | 3247 | 1    | 1147 |
| cb9571_c10/f1p1/1876     | isoform=cb9571_c10;full_length_coverage=1;non_full_length_coverage=1;isoform_length=1876;expected_accuracy=0.997    | gnl BL_ORD_ID 21299 cb9571_c7/f1p1/2039     | 1    | 1247 | 1248 | 1876 | 1    | 1252 | 1411 | 2038 |
| cb8564_c152641/f1p6/2794 | isoform=cb8564_c72362;full_length_coverage=4;non_full_length_coverage=1;isoform_length=4130;expected_accuracy=0.998 | gnl BL_ORD_ID 16364 cb8564_c72362/f4p1/4130 | 197  | 2753 | 12   | 196  | 1570 | 4130 | 63   | 250  |

|                         |                                                                                                                                                                          |     |      |      |      |      |      |      |      |
|-------------------------|--------------------------------------------------------------------------------------------------------------------------------------------------------------------------|-----|------|------|------|------|------|------|------|
| cb2279_c5/f1p1/2918     | gnl BL_ORD_ID 36529      cb2279_c6/f1p1/3055<br>isoform=cb2279_c6;full_length_coverage=1;non_full_length_coverage=1;isoform_length=3055;expected_accuracy=0.996          | 22  | 2593 | 2592 | 2960 | 16   | 2580 | 2692 | 3054 |
| cb8564_c50881/f1p2/2125 | gnl BL_ORD_ID 11977      cb8564_c146395/f9p1/2471<br>isoform=cb8564_c50881;full_length_coverage=1;non_full_length_coverage=2;isoform_length=2125;expected_accuracy=0.994 | 1   | 1863 | 1858 | 2112 | 1    | 1865 | 2142 | 2399 |
| cb6528_c8/f1p0/2123     | gnl BL_ORD_ID 49801      cb6528_c5/f1p0/2611                                                                                                                             | 1   | 1276 | 1273 | 2032 | 122  | 1397 | 1853 | 2611 |
| cb3586_c10/f1p0/2722    | gnl BL_ORD_ID 41149      cb3586_c2/f1p0/3545<br>isoform=cb3586_c10;full_length_coverage=1;non_full_length_coverage=0;isoform_length=2722;expected_accuracy=0.993         | 252 | 2722 | 1    | 252  | 950  | 3422 | 77   | 335  |
| cb8564_c42506/f1p0/2909 | gnl BL_ORD_ID 55988      cb8564_c51312/f1p2/3964                                                                                                                         | 1   | 2203 | 2199 | 2857 | 1057 | 3259 | 3129 | 3787 |
| cb8564_c12355/f1p9/2685 | gnl BL_ORD_ID 17556      cb8564_c9820/f2p0/3032<br>isoform=cb8564_c12355;full_length_coverage=1;non_full_length_coverage=9;isoform_length=2685;expected_accuracy=0.999   | 1   | 1731 | 1729 | 2630 | 1    | 1704 | 2131 | 3032 |
| cb4142_c6/f1p0/2339     | gnl BL_ORD_ID 40542      cb4142_c1/f1p0/3435<br>isoform=cb4142_c1;full_length_coverage=1;non_full_length_coverage=0;isoform_length=3435;expected_accuracy=0.996          | 550 | 2034 | 9    | 552  | 1947 | 3431 | 30   | 570  |
| cb8564_c74379/f1p1/2508 | gnl BL_ORD_ID 56412      cb8564_c76337/f1p1/2735                                                                                                                         | 1   | 1645 | 1642 | 2369 | 2    | 1647 | 1852 | 2579 |



|                          |                                                                                                                                                                          |      |      |      |      |      |      |      |      |
|--------------------------|--------------------------------------------------------------------------------------------------------------------------------------------------------------------------|------|------|------|------|------|------|------|------|
| cb6471_c27/f1p0/2602     | gnl BL_ORD_ID 5494      cb6471_c7/f2p0/2927<br>isoform=cb6471_c7;full_length_coverage=2;non_full_length_coverage=0;isoform_length=2927;expected_accuracy=0.997           | 1    | 1863 | 1864 | 2622 | 52   | 1914 | 2074 | 2832 |
| cb8564_c160490/f1p4/3939 | gnl BL_ORD_ID 9961      cb8564_c12013/f1p0/4420<br>isoform=cb8564_c12013;full_length_coverage=1;non_full_length_coverage=0;isoform_length=4420;expected_accuracy=0.993   | 1    | 3052 | 3048 | 3789 | 35   | 3077 | 3654 | 4397 |
| cb1224_c13/f1p1/3758     | gnl BL_ORD_ID 59284      cb1224_c19/f1p1/4162                                                                                                                            | 1    | 2859 | 2863 | 3647 | 212  | 3070 | 3250 | 4033 |
| cb8564_c125661/f1p1/2227 | gnl BL_ORD_ID 53602      cb8564_c129771/f1p0/3078                                                                                                                        | 1    | 1184 | 1179 | 2079 | 1    | 1183 | 2152 | 3052 |
| cb8564_c124328/f1p0/1986 | gnl BL_ORD_ID 18994      cb8564_c87879/f1p0/2371<br>isoform=cb8564_c124328;full_length_coverage=1;non_full_length_coverage=0;isoform_length=1986;expected_accuracy=0.991 | 1    | 1479 | 1475 | 1986 | 4    | 1487 | 1859 | 2369 |
| cb535_c2/f1p0/4696       | gnl BL_ORD_ID 45719      cb535_c5/f1p0/4656<br>isoform=cb535_c5;full_length_coverage=1;non_full_length_coverage=0;isoform_length=4656;expected_accuracy=0.995            | 1012 | 4486 | 1    | 1012 | 1192 | 4656 | 4    | 1012 |
| cb8564_c41162/f1p0/3158  | gnl BL_ORD_ID 55578      cb8564_c45787/f1p3/3310                                                                                                                         | 10   | 2553 | 2548 | 3040 | 104  | 2647 | 2778 | 3270 |
| cb309_c7/f1p2/4109       | gnl BL_ORD_ID 69547      cb309_c21/f1p0/4520<br>isoform=cb309_c7;full_length_coverage=1;non_full_length_coverage=2;isoform_length=4109;expected_accuracy=0.997           | 1    | 3739 | 3740 | 4085 | 2    | 3720 | 4055 | 4400 |

|                                                                                                                                                  |                                                                                                                                                                         |     |      |      |      |     |      |      |      |
|--------------------------------------------------------------------------------------------------------------------------------------------------|-------------------------------------------------------------------------------------------------------------------------------------------------------------------------|-----|------|------|------|-----|------|------|------|
| cb9541_c3/f1p0/2530<br>isoform=cb9541_c3;full_length_coverage=1;non_full_length_coverage=0;isoform_length=2530;expected_accuracy=0.999           | gnl BL_ORD_ID 19611      cb9541_c2/f1p0/2876<br>isoform=cb9541_c2;full_length_coverage=1;non_full_length_coverage=0;isoform_length=2876;expected_accuracy=0.999         | 1   | 2264 | 2262 | 2530 | 85  | 2357 | 2469 | 2739 |
| cb18456_c1748/f1p0/1180                                                                                                                          | gnl BL_ORD_ID 67356      cb18456_c1797/f1p0/1494                                                                                                                        | 243 | 1188 | 3    | 248  | 420 | 1365 | 39   | 282  |
| cb2640_c23/f1p0/2402                                                                                                                             | gnl BL_ORD_ID 37283      cb2640_c31/f3p0/3266<br>isoform=cb2640_c31;full_length_coverage=3;non_full_length_coverage=0;isoform_length=3266;expected_accuracy=1.000       | 1   | 2036 | 2038 | 2406 | 15  | 2050 | 2775 | 3144 |
| cb750_c64/f2p2/3775<br>isoform=cb750_c64;full_length_coverage=2;non_full_length_coverage=2;isoform_length=3775;expected_accuracy=1.000           | gnl BL_ORD_ID 7348      cb750_c27/f1p1/4163<br>isoform=cb750_c27;full_length_coverage=1;non_full_length_coverage=1;isoform_length=4163;expected_accuracy=0.998          | 170 | 2328 | 2327 | 3770 | 1   | 2162 | 2719 | 4163 |
| cb6794_c9/f2p0/2356<br>isoform=cb6794_c9;full_length_coverage=2;non_full_length_coverage=0;isoform_length=2356;expected_accuracy=1.000           | gnl BL_ORD_ID 4893      cb6794_c49/f6p1/2503<br>isoform=cb6794_c49;full_length_coverage=6;non_full_length_coverage=1;isoform_length=2503;expected_accuracy=0.998        | 1   | 2119 | 2117 | 2354 | 1   | 2118 | 2266 | 2503 |
| cb8564_c184250/f1p0/2256<br>isoform=cb8564_c184250;full_length_coverage=1;non_full_length_coverage=0;isoform_length=2256;expected_accuracy=0.996 | gnl BL_ORD_ID 56102      cb8564_c69761/f1p0/2560                                                                                                                        | 1   | 1642 | 1638 | 2255 | 1   | 1651 | 1912 | 2527 |
| cb8564_c15653/f1p4/2475                                                                                                                          | gnl BL_ORD_ID 13571      cb8564_c20949/f2p0/2862<br>isoform=cb8564_c20949;full_length_coverage=2;non_full_length_coverage=0;isoform_length=2862;expected_accuracy=0.997 | 1   | 2293 | 2289 | 2482 | 150 | 2441 | 2660 | 2853 |

|                                                                                                                                                  |                                                                                                                                                                      |     |      |      |      |      |          |      |          |
|--------------------------------------------------------------------------------------------------------------------------------------------------|----------------------------------------------------------------------------------------------------------------------------------------------------------------------|-----|------|------|------|------|----------|------|----------|
| cb8564_c42814/f1p0/2151<br>isoform=cb8564_c42814;full_length_coverage=1;non_full_length_coverage=0;isoform_length=2151;expected_accuracy=0.993   | gnl BL_ORD_ID 55376 cb8564_c39821/f1p0/3886                                                                                                                          | 650 | 2148 | 7    | 652  | 2251 | 373<br>5 | 1    | 647      |
| cb3603_c18/f1p1/2591                                                                                                                             | gnl BL_ORD_ID 40849 cb3603_c49/f12p4/3214<br>isoform=cb3603_c49;full_length_coverage=12;non_full_length_coverage=4;isoform_length=3214;expected_accuracy=1.000       | 201 | 2583 | 2    | 201  | 802  | 318<br>4 | 1    | 203      |
| cb8564_c89918/f1p1/2045<br>isoform=cb8564_c89918;full_length_coverage=1;non_full_length_coverage=1;isoform_length=2045;expected_accuracy=0.991   | gnl BL_ORD_ID 52251 cb8564_c115598/f1p0/2466                                                                                                                         | 1   | 1616 | 1611 | 2045 | 5    | 159<br>2 | 1787 | 222<br>0 |
| cb8564_c128725/f1p1/2771<br>isoform=cb8564_c128725;full_length_coverage=1;non_full_length_coverage=1;isoform_length=2771;expected_accuracy=1.000 | gnl BL_ORD_ID 56601 cb8564_c48153/f1p0/3083                                                                                                                          | 1   | 2669 | 2664 | 2769 | 13   | 268<br>2 | 2792 | 289<br>6 |
| cb13770_c0/f5p0/1737<br>isoform=cb13770_c0;full_length_coverage=5;non_full_length_coverage=0;isoform_length=1737;expected_accuracy=1.000         | gnl BL_ORD_ID 18766 cb8564_c92150/f1p0/4398<br>isoform=cb8564_c92150;full_length_coverage=1;non_full_length_coverage=0;isoform_length=4398;expected_accuracy=0.997   | 108 | 1725 | 1    | 110  | 2784 | 439<br>8 | 1    | 109      |
| cb8564_c69975/f1p0/2818<br>isoform=cb8564_c69975;full_length_coverage=1;non_full_length_coverage=0;isoform_length=2818;expected_accuracy=0.999   | gnl BL_ORD_ID 12051 cb8564_c147180/f4p0/3043<br>isoform=cb8564_c147180;full_length_coverage=4;non_full_length_coverage=0;isoform_length=3043;expected_accuracy=0.998 | 260 | 2818 | 1    | 259  | 420  | 297<br>7 | 1    | 259      |
| cb18456_c6530/f1p0/1200                                                                                                                          | gnl BL_ORD_ID 22961 cb11694_c0/f1p2/1835<br>isoform=cb11694_c0;full_length_coverage=1;non_full_l                                                                     | 260 | 1166 | 3    | 259  | 964  | 59       | 1751 | 149<br>5 |



|                                                             |                                                                                                                                                                           |     |      |      |      |     |      |      |      |  |
|-------------------------------------------------------------|---------------------------------------------------------------------------------------------------------------------------------------------------------------------------|-----|------|------|------|-----|------|------|------|--|
| ngth_coverage=0;isoform_length=2298;expected_accuracy=0.998 | ngth_coverage=0;isoform_length=2643;expected_accuracy=0.998                                                                                                               |     |      |      |      |     |      |      |      |  |
| cb8564_c15653/f1p4/2475                                     | gnl BL_ORD_ID 17747      cb8564_c81734/f1p1/2771<br>isoform=cb8564_c81734;full_length_coverage=1;non_full_length_coverage=1;isoform_length=2771;expected_accuracy=0.995   | 1   | 2293 | 2289 | 2426 | 124 | 2414 | 2634 | 2771 |  |
| cb8564_c15376/f1p0/4060                                     | gnl BL_ORD_ID 10828      cb8564_c10736/f3p10/3904<br>isoform=cb8564_c10736;full_length_coverage=3;non_full_length_coverage=10;isoform_length=3904;expected_accuracy=0.998 | 12  | 2717 | 2717 | 3675 | 137 | 2842 | 2946 | 3904 |  |
| cb8564_c78606/f1p0/3454                                     | isoform=cb8564_c78606;full_length_coverage=1;non_full_length_coverage=0;isoform_length=3454;expected_accuracy=0.992                                                       |     |      |      |      |     |      |      |      |  |
| cb313_c3/f2p0/2434                                          | gnl BL_ORD_ID 56330      cb8564_c74576/f1p0/4386                                                                                                                          | 1   | 2448 | 2448 | 3452 | 7   | 2452 | 3000 | 4002 |  |
| cb8564_c41756/f1p0/2738                                     | gnl BL_ORD_ID 38276      cb313_c5/f2p0/2828<br>isoform=cb313_c5;full_length_coverage=2;non_full_length_coverage=0;isoform_length=2828;expected_accuracy=0.997             | 2   | 2112 | 2112 | 2393 | 5   | 2113 | 2547 | 2828 |  |
| cb8564_c5050/f1p0/3151                                      | gnl BL_ORD_ID 55866      cb8564_c47522/f1p0/2954                                                                                                                          | 1   | 2173 | 2170 | 2738 | 1   | 2158 | 2281 | 2849 |  |
| cb8564_c5050/f1p0/3151                                      | gnl BL_ORD_ID 16604      cb8564_c5045/f1p0/3665<br>isoform=cb8564_c5045;full_length_coverage=1;non_full_length_coverage=0;isoform_length=3665;expected_accuracy=0.994     | 141 | 3151 | 1    | 142  | 384 | 3399 | 54   | 195  |  |

|                                                                                                                                                |                                                                                                                                                                                           |      |      |      |      |      |          |      |          |
|------------------------------------------------------------------------------------------------------------------------------------------------|-------------------------------------------------------------------------------------------------------------------------------------------------------------------------------------------|------|------|------|------|------|----------|------|----------|
| cb8564_c90621/f1p2/3030<br>isoform=cb8564_c90621;full_length_coverage=1;non_full_length_coverage=2;isoform_length=3030;expected_accuracy=0.994 | gnl BL_ORD_ID 56770 cb8564_c71034/f1p2/3266                                                                                                                                               | 206  | 3030 | 1    | 205  | 361  | 318<br>4 | 23   | 227      |
| cb581_c7/f1p0/2369<br>isoform=cb581_c7;full_length_coverage=1;non_full_length_coverage=0;isoform_length=2369;expected_accuracy=0.990           | gnl BL_ORD_ID 45251                      cb581_c4/f1p1/2569<br>isoform=cb581_c4;full_length_coverage=1;non_full_length_coverage=1;isoform_length=2569;expected_accuracy=0.999             | 1    | 1631 | 1627 | 2368 | 79   | 172<br>8 | 1833 | 256<br>9 |
| cb8564_c20798/f1p1/2960                                                                                                                        | gnl BL_ORD_ID 9759                      cb8564_c108367/f4p6/3120<br>isoform=cb8564_c108367;full_length_coverage=4;non_full_length_coverage=6;isoform_length=3120;expected_accuracy=0.999  | 1314 | 2932 | 1    | 1319 | 1483 | 310<br>1 | 21   | 133<br>9 |
| cb8564_c38035/f1p0/2770                                                                                                                        | gnl BL_ORD_ID 56623 cb8564_c49310/f1p2/3045                                                                                                                                               | 19   | 2035 | 2033 | 2756 | 65   | 208<br>4 | 2274 | 299<br>8 |
| cb6095_c3/f1p0/2445<br>isoform=cb6095_c3;full_length_coverage=1;non_full_length_coverage=0;isoform_length=2445;expected_accuracy=0.994         | gnl BL_ORD_ID 46748                      cb6095_c2/f1p0/2694<br>isoform=cb6095_c2;full_length_coverage=1;non_full_length_coverage=0;isoform_length=2694;expected_accuracy=0.994           | 1    | 1340 | 1338 | 2445 | 12   | 134<br>9 | 1516 | 262<br>4 |
| cb2640_c23/f1p0/2402                                                                                                                           | gnl BL_ORD_ID 69857 cb2640_c25/f1p0/3308                                                                                                                                                  | 1    | 2036 | 2038 | 2400 | 60   | 209<br>5 | 2820 | 318<br>4 |
| cb8564_c3927/f1p1/2747<br>isoform=cb8564_c3927;full_length_coverage=1;non_full_length_coverage=1;isoform_length=2747;expected_accuracy=0.995   | gnl BL_ORD_ID 12615                      cb8564_c138783/f5p1/3091<br>isoform=cb8564_c138783;full_length_coverage=5;non_full_length_coverage=1;isoform_length=3091;expected_accuracy=0.999 | 1    | 1593 | 1593 | 2747 | 132  | 172<br>4 | 1850 | 300<br>2 |
| cb316_c29/f1p2/4133<br>isoform=cb316_c29;full_length_coverage=1;non_full_length_coverage=0;isoform_length=4133;expected_accuracy=0.994         | gnl BL_ORD_ID 69554 cb316_c10/f1p2/4819                                                                                                                                                   | 2    | 2583 | 2579 | 4121 | 142  | 270<br>2 | 3318 | 485<br>8 |

|                                                                                                                                                                                                               |                                                                                                                                                                    |     |      |      |      |      |          |      |          |
|---------------------------------------------------------------------------------------------------------------------------------------------------------------------------------------------------------------|--------------------------------------------------------------------------------------------------------------------------------------------------------------------|-----|------|------|------|------|----------|------|----------|
| ngth_coverage=2;isoform_length=4133;expected_accuracy=0.992<br>cb8564_c42814/f1p0/2151<br>isoform=cb8564_c42814;full_length_coverage=1;non_full_length_coverage=0;isoform_length=2151;expected_accuracy=0.993 | gnl BL_ORD_ID 54403 cb8564_c35093/f1p5/2916                                                                                                                        | 650 | 2151 | 8    | 652  | 1380 | 288<br>3 | 20   | 692      |
| cb8564_c123192/f1p0/1931<br>isoform=cb8564_c123192;full_length_coverage=1;non_full_length_coverage=0;isoform_length=1931;expected_accuracy=0.994                                                              | gnl BL_ORD_ID 18186 cb8564_c79521/f2p0/2343<br>isoform=cb8564_c79521;full_length_coverage=2;non_full_length_coverage=0;isoform_length=2343;expected_accuracy=0.995 | 1   | 1173 | 1172 | 1931 | 1    | 1177     | 1311 | 207<br>0 |
| cb18456_c1418/f2p0/1818<br>isoform=cb18456_c1418;full_length_coverage=2;non_full_length_coverage=0;isoform_length=1818;expected_accuracy=0.992                                                                | gnl BL_ORD_ID 56115 cb8564_c70012/f1p0/2001                                                                                                                        | 1   | 1002 | 998  | 1818 | 2    | 998      | 1098 | 191<br>3 |
| cb8564_c88409/f1p1/2884<br>cb8564_c181853/f1p0/2119<br>isoform=cb8564_c181853;full_length_coverage=1;non_full_length_coverage=0;isoform_length=2119;expected_accuracy=0.997                                   | gnl BL_ORD_ID 67972 cb18738_c0/f1p0/5429<br>gnl BL_ORD_ID 55383 cb8564_c40109/f1p0/2886                                                                            | 1   | 1486 | 1486 | 2758 | 13   | 150<br>4 | 4055 | 532<br>7 |
| cb848_c2/f2p2/3920<br>isoform=cb848_c2;full_length_coverage=2;non_full_length_coverage=2;isoform_length=3920;expected_accuracy=0.993                                                                          | gnl BL_ORD_ID 9940 cb848_c9/f1p1/4053<br>isoform=cb848_c9;full_length_coverage=1;non_full_length_coverage=1;isoform_length=4053;expected_accuracy=0.995            | 1   | 3501 | 3500 | 3917 | 4    | 352<br>1 | 3632 | 404<br>8 |
| cb2880_c1/f3p0/2764<br>isoform=cb2880_c1;full_length_coverage=3;non_full_length_coverage=3;isoform_length=2764;expected_accuracy=0.997                                                                        | gnl BL_ORD_ID 38441 cb2880_c3/f1p0/3627<br>isoform=cb2880_c3;full_length_coverage=1;non_full_length_coverage=1;isoform_length=3627;expected_accuracy=0.997         | 1   | 2302 | 2297 | 2764 | 3    | 230<br>6 | 3160 | 362<br>7 |

|                                                                                                                                                                                                                                                                                                                                                                                                                                                         |                                                                                                                                                                                                                                                                                                                                                                                                                                                                                                                              |     |      |      |      |     |          |      |          |
|---------------------------------------------------------------------------------------------------------------------------------------------------------------------------------------------------------------------------------------------------------------------------------------------------------------------------------------------------------------------------------------------------------------------------------------------------------|------------------------------------------------------------------------------------------------------------------------------------------------------------------------------------------------------------------------------------------------------------------------------------------------------------------------------------------------------------------------------------------------------------------------------------------------------------------------------------------------------------------------------|-----|------|------|------|-----|----------|------|----------|
| ngth_coverage=0;isoform_length=2764;expected_accuracy=1.000<br>cb10963_c2/f1p0/1707<br>isoform=cb10963_c2;full_length_coverage=1;non_full_length_coverage=0;isoform_length=1707;expected_accuracy=0.996<br>cb2733_c21/f1p0/1180<br>isoform=cb2733_c21;full_length_coverage=1;non_full_length_coverage=0;isoform_length=1180;expected_accuracy=1.000                                                                                                     | ngth_coverage=0;isoform_length=3627;expected_accuracy=0.991<br>gnl BL_ORD_ID 1150                      cb10963_c1/f1p0/2063<br>isoform=cb10963_c1;full_length_coverage=1;non_full_length_coverage=0;isoform_length=2063;expected_accuracy=0.992                                                                                                                                                                                                                                                                              | 560 | 1698 | 64   | 562  | 925 | 206<br>3 | 1    | 499      |
| cb13082_c10/f1p0/1535<br><br>cb653_c9/f1p0/4025<br>isoform=cb653_c9;full_length_coverage=1;non_full_length_coverage=0;isoform_length=4025;expected_accuracy=0.997<br>cb2873_c1/f12p3/3025<br>isoform=cb2873_c1;full_length_coverage=12;non_full_length_coverage=3;isoform_length=3025;expected_accuracy=1.000<br>cb7764_c6/f1p0/2353<br>isoform=cb7764_c6;full_length_coverage=1;non_full_length_coverage=0;isoform_length=2353;expected_accuracy=0.999 | gnl BL_ORD_ID 68774   cb2733_c13/f1p0/1472<br><br>gnl BL_ORD_ID 25743                      cb13082_c2/f3p0/1615<br>isoform=cb13082_c2;full_length_coverage=3;non_full_length_coverage=0;isoform_length=1615;expected_accuracy=1.000<br><br>gnl BL_ORD_ID 49384   cb653_c26/f1p0/4462<br><br>gnl BL_ORD_ID 68966   cb2873_c10/f1p0/3294<br><br>gnl BL_ORD_ID 7024                      cb7764_c5/f1p0/2511<br>isoform=cb7764_c5;full_length_coverage=1;non_full_length_coverage=0;isoform_length=2511;expected_accuracy=0.996 | 115 | 1180 | 1    | 115  | 261 | 132<br>6 | 3    | 118      |
|                                                                                                                                                                                                                                                                                                                                                                                                                                                         |                                                                                                                                                                                                                                                                                                                                                                                                                                                                                                                              | 1   | 1284 | 1283 | 1480 | 2   | 128<br>5 | 1418 | 161<br>5 |
|                                                                                                                                                                                                                                                                                                                                                                                                                                                         |                                                                                                                                                                                                                                                                                                                                                                                                                                                                                                                              | 301 | 4024 | 3    | 301  | 484 | 420<br>8 | 7    | 306      |
|                                                                                                                                                                                                                                                                                                                                                                                                                                                         |                                                                                                                                                                                                                                                                                                                                                                                                                                                                                                                              | 191 | 3025 | 11   | 191  | 321 | 315<br>3 | 1    | 181      |
|                                                                                                                                                                                                                                                                                                                                                                                                                                                         |                                                                                                                                                                                                                                                                                                                                                                                                                                                                                                                              | 245 | 2320 | 3    | 249  | 439 | 251<br>0 | 89   | 335      |



|                                                                                                                                                  |                                                                                                                                                                    |      |      |      |      |      |      |      |      |
|--------------------------------------------------------------------------------------------------------------------------------------------------|--------------------------------------------------------------------------------------------------------------------------------------------------------------------|------|------|------|------|------|------|------|------|
| cb4674_c86/f89p3/3166<br>isoform=cb4674_c86;full_length_coverage=89;non_full_length_coverage=3;isoform_length=3166;expected_accuracy=1.000       | gnl BL_ORD_ID 72844 cb4674_c33/f1p3/3281                                                                                                                           | 100  | 2315 | 2313 | 3166 | 3    | 2220 | 2382 | 3234 |
| cb8564_c185920/f1p0/2777<br>isoform=cb8564_c185920;full_length_coverage=1;non_full_length_coverage=0;isoform_length=2777;expected_accuracy=0.996 | gnl BL_ORD_ID 14399 cb8564_c39189/f1p1/2975<br>isoform=cb8564_c39189;full_length_coverage=1;non_full_length_coverage=1;isoform_length=2975;expected_accuracy=0.992 | 174  | 2776 | 1    | 177  | 355  | 2975 | 15   | 193  |
| cb6221_c5/f3p1/2261<br>isoform=cb6221_c5;full_length_coverage=3;non_full_length_coverage=1;isoform_length=2261;expected_accuracy=0.999           | gnl BL_ORD_ID 4880 cb6221_c4/f3p3/2906<br>isoform=cb6221_c4;full_length_coverage=3;non_full_length_coverage=3;isoform_length=2906;expected_accuracy=1.000          | 256  | 2260 | 73   | 256  | 900  | 2905 | 1    | 187  |
| cb5891_c8/f1p0/2721<br>isoform=cb5891_c2;full_length_coverage=1;non_full_length_coverage=0;isoform_length=3660;expected_accuracy=1.000           | gnl BL_ORD_ID 45259 cb5891_c2/f1p0/3660<br>isoform=cb5891_c2;full_length_coverage=1;non_full_length_coverage=0;isoform_length=3660;expected_accuracy=1.000         | 1213 | 2627 | 1    | 1212 | 2247 | 3660 | 1    | 1210 |
| cb8564_c4743/f1p0/2508<br>isoform=cb8564_c4743;full_length_coverage=1;non_full_length_coverage=0;isoform_length=2508;expected_accuracy=0.994     | gnl BL_ORD_ID 14698 cb8564_c4069/f2p0/2782<br>isoform=cb8564_c4069;full_length_coverage=2;non_full_length_coverage=0;isoform_length=2782;expected_accuracy=0.995   | 1    | 2086 | 2084 | 2508 | 1    | 2103 | 2282 | 2705 |
| cb4508_c10/f1p1/2787<br>isoform=cb4508_c4;full_length_coverage=1;non_full_length_coverage=1;isoform_length=3290;expected_accuracy=0.996          | gnl BL_ORD_ID 42640 cb4508_c4/f1p1/3290<br>isoform=cb4508_c4;full_length_coverage=1;non_full_length_coverage=1;isoform_length=3290;expected_accuracy=0.996         | 113  | 2767 | 1    | 109  | 634  | 3288 | 1    | 109  |
| cb8564_c44074/f1p1/2922<br>isoform=cb8564_c44074;full_length_coverage=1;non_full_length_coverage=0;isoform_length=2922;expected_accuracy=0.999   | gnl BL_ORD_ID 17429 cb8564_c85447/f1p0/3196<br>isoform=cb8564_c85447;full_length_coverage=1;non_full_length_coverage=0;isoform_length=3196;expected_accuracy=0.999 | 1    | 2397 | 2396 | 2922 | 3    | 2413 | 2660 | 3196 |

|                                                                                                                                                                                                             |                                                                                                                                                                                                                                                     |     |      |      |      |      |          |      |          |
|-------------------------------------------------------------------------------------------------------------------------------------------------------------------------------------------------------------|-----------------------------------------------------------------------------------------------------------------------------------------------------------------------------------------------------------------------------------------------------|-----|------|------|------|------|----------|------|----------|
| ull_length_coverage=1;isoform_length=2922;expected_accuracy=0.994<br>cb8785_c2/f1p0/2198<br>isoform=cb8785_c2;full_length_coverage=1;non_full_length_coverage=0;isoform_length=2198;expected_accuracy=0.998 | ll_length_coverage=0;isoform_length=3196;expected_accuracy=0.997<br>gnl BL_ORD_ID 19241                      cb8785_c3/f1p0/3260<br>isoform=cb8785_c3;full_length_coverage=1;non_full_length_coverage=0;isoform_length=3260;expected_accuracy=0.996 | 1   | 1641 | 1639 | 2123 | 81   | 172<br>2 | 2778 | 326<br>0 |
| cb317_c13/f1p0/4439                                                                                                                                                                                         | gnl BL_ORD_ID 37313                      cb317_c17/f1p0/4336<br>isoform=cb317_c17;full_length_coverage=1;non_full_length_coverage=0;isoform_length=4336;expected_accuracy=0.993                                                                     | 109 | 3147 | 3142 | 4219 | 1    | 302<br>6 | 3251 | 432<br>0 |
| cb750_c21/f1p0/3523                                                                                                                                                                                         | gnl BL_ORD_ID 8048                      cb750_c40/f1p0/3632<br>isoform=cb750_c40;full_length_coverage=1;non_full_length_coverage=0;isoform_length=3632;expected_accuracy=0.990                                                                      | 673 | 3466 | 88   | 674  | 827  | 363<br>2 | 135  | 727      |
| cb4674_c89/f1p0/1671<br>isoform=cb4674_c89;full_length_coverage=1;non_full_length_coverage=0;isoform_length=1671;expected_accuracy=0.995                                                                    | gnl BL_ORD_ID 43463                      cb4674_c77/f1p2/3189<br>isoform=cb4674_c77;full_length_coverage=1;non_full_length_coverage=2;isoform_length=3189;expected_accuracy=0.999                                                                   | 1   | 1114 | 1110 | 1671 | 1269 | 238<br>0 | 2547 | 310<br>6 |
| cb8564_c146679/f2p0/2668<br>isoform=cb8564_c146679;full_length_coverage=2;non_full_length_coverage=0;isoform_length=2668;expected_accuracy=1.000                                                            | gnl BL_ORD_ID 52101   cb8564_c110923/f1p0/3133                                                                                                                                                                                                      | 278 | 2668 | 74   | 282  | 300  | 269<br>1 | 2    | 197      |
| cb2055_c29/f1p0/2360                                                                                                                                                                                        | gnl BL_ORD_ID 35222                      cb2055_c22/f1p0/3295<br>isoform=cb2055_c22;full_length_coverage=1;non_full_length_coverage=0;isoform_length=3295;expected_accuracy=0.994                                                                   | 1   | 1859 | 1857 | 2198 | 183  | 203<br>4 | 2784 | 312<br>6 |

|                                                                                                                                                  |                                                                                                                                                                         |     |      |      |      |     |          |      |          |
|--------------------------------------------------------------------------------------------------------------------------------------------------|-------------------------------------------------------------------------------------------------------------------------------------------------------------------------|-----|------|------|------|-----|----------|------|----------|
| cb8101_c9/flp0/2203<br>isoform=cb8101_c9;full_length_coverage=1;non_full_length_coverage=0;isoform_length=2203;expected_accuracy=0.997           | gnl BL_ORD_ID 51750 cb8101_c4/flp0/2459                                                                                                                                 | 1   | 1617 | 1613 | 2105 | 228 | 184<br>3 | 1957 | 244<br>9 |
| cb8564_c182049/flp0/3195<br>isoform=cb8564_c182049;full_length_coverage=1;non_full_length_coverage=0;isoform_length=3195;expected_accuracy=0.997 | gnl BL_ORD_ID 55939 cb8564_c49630/flp4/3487                                                                                                                             | 2   | 2935 | 2935 | 3185 | 1   | 291<br>3 | 3243 | 349<br>3 |
| cb8564_c44063/flp0/2503<br>isoform=cb8564_c44063;full_length_coverage=1;non_full_length_coverage=0;isoform_length=2503;expected_accuracy=0.999   | gnl BL_ORD_ID 55861 cb8564_c47234/flp0/2932                                                                                                                             | 397 | 2503 | 48   | 402  | 597 | 270<br>2 | 97   | 452      |
| cb912_c15/flp0/2991<br>isoform=cb912_c15;full_length_coverage=1;non_full_length_coverage=0;isoform_length=2991;expected_accuracy=0.999           | gnl BL_ORD_ID 59087 cb912_c9/flp1/3267                                                                                                                                  | 1   | 2472 | 2469 | 2929 | 130 | 260<br>2 | 2739 | 319<br>9 |
| cb11851_c28/flp0/1049<br>isoform=cb11851_c28;full_length_coverage=1;non_full_length_coverage=0;isoform_length=1049;expected_accuracy=0.994       | gnl BL_ORD_ID 61534 cb11851_c31/flp1/1766                                                                                                                               | 411 | 1007 | 5    | 416  | 561 | 1157     | 1    | 413      |
| cb8564_c37361/flp0/3076                                                                                                                          | gnl BL_ORD_ID 14471      cb8564_c34518/flp0/3136<br>isoform=cb8564_c34518;full_length_coverage=1;non_full_length_coverage=0;isoform_length=3136;expected_accuracy=0.991 | 1   | 2481 | 2477 | 3070 | 1   | 244<br>9 | 2550 | 313<br>6 |
| cb8564_c42285/flp0/3370                                                                                                                          | gnl BL_ORD_ID 17429      cb8564_c85447/flp0/3196<br>isoform=cb8564_c85447;full_length_coverage=1;non_full_length_coverage=0;isoform_length=3196;expected_accuracy=0.991 | 1   | 2418 | 2417 | 2953 | 3   | 241<br>3 | 2660 | 319<br>6 |

|                          |                                                                                                                      |                     |                         |     |      |      |      |     |     |      |     |
|--------------------------|----------------------------------------------------------------------------------------------------------------------|---------------------|-------------------------|-----|------|------|------|-----|-----|------|-----|
| cb8564_c118788/f2p0/2730 | isoform=cb8564_c118788;full_length_coverage=2;non_full_length_coverage=0;isoform_length=2730;expected_accuracy=0.999 | gnl BL_ORD_ID 17627 | cb8564_c86161/f2p0/2876 | 1   | 1710 | 1709 | 2680 | 62  | 177 | 1904 | 287 |
| cb8564_c87855/f1p1/2779  | isoform=cb8564_c87855;full_length_coverage=1;non_full_length_coverage=1;isoform_length=2779;expected_accuracy=0.997  | gnl BL_ORD_ID 14718 | cb8564_c39852/f1p0/3673 | 134 | 1972 | 1970 | 2779 | 1   | 183 | 2865 | 367 |
| cb8564_c40598/f1p4/3119  |                                                                                                                      | gnl BL_ORD_ID 58037 | cb8564_c87188/f1p1/3426 | 26  | 2732 | 2729 | 3058 | 130 | 283 | 2957 | 328 |
| cb7884_c5/f1p0/2380      | isoform=cb7884_c5;full_length_coverage=1;non_full_length_coverage=0;isoform_length=2380;expected_accuracy=0.994      | gnl BL_ORD_ID 7114  | cb7884_c4/f1p0/2511     | 13  | 1565 | 1563 | 2380 | 1   | 155 | 1684 | 250 |
| cb435_c6/f1p0/5339       |                                                                                                                      | gnl BL_ORD_ID 72170 | cb435_c7/f1p0/5320      | 25  | 4329 | 4327 | 4707 | 62  | 436 | 4933 | 531 |
| cb18456_c5939/f1p3/1634  |                                                                                                                      | gnl BL_ORD_ID 17669 | cb8564_c868/f2p9/1907   | 283 | 1498 | 4    | 283  | 690 | 190 | 1    | 285 |
| cb8564_c49562/f1p0/2838  | isoform=cb8564_c49562;full_length_coverage=1;non_full_length_coverage=0;isoform_length=2838;expected_accuracy=0.995  | gnl BL_ORD_ID 55341 | cb8564_c38927/f1p0/3326 | 1   | 2331 | 2327 | 2838 | 3   | 233 | 2444 | 296 |

|                                                                                                                                                |                                                                                                                                                                |      |      |      |      |      |          |      |          |
|------------------------------------------------------------------------------------------------------------------------------------------------|----------------------------------------------------------------------------------------------------------------------------------------------------------------|------|------|------|------|------|----------|------|----------|
| cb16619_c3/f1p0/1732                                                                                                                           | gnl BL_ORD_ID 74658 cb5921_c54/f1p0/2912                                                                                                                       | 119  | 1569 | 1    | 120  | 1430 | 288<br>1 | 2    | 122      |
| cb8564_c36663/f1p0/2776<br>isoform=cb8564_c36663;full_length_coverage=1;non_full_length_coverage=0;isoform_length=2776;expected_accuracy=0.995 | gnl BL_ORD_ID 67977 cb18745_c2/f1p0/5425                                                                                                                       | 1    | 1636 | 1636 | 2776 | 2387 | 401<br>8 | 4122 | 526<br>2 |
| cb12_c37/f1p0/4067                                                                                                                             | gnl BL_ORD_ID 61089 cb12_c50/f1p0/4439                                                                                                                         | 286  | 4080 | 1    | 289  | 503  | 431<br>2 | 21   | 309      |
| cb11489_c0/f1p0/1094<br>isoform=cb11489_c0;full_length_coverage=1;non_full_length_coverage=0;isoform_length=1094;expected_accuracy=0.995       | gnl BL_ORD_ID 24432 cb11489_c1/f1p0/3982<br>isoform=cb11489_c1;full_length_coverage=1;non_full_length_coverage=0;isoform_length=3982;expected_accuracy=0.995   | 193  | 1094 | 21   | 192  | 2820 | 372<br>6 | 26   | 196      |
| cb2388_c9/f1p0/2763                                                                                                                            | gnl BL_ORD_ID 38706 cb2388_c8/f1p1/3379<br>isoform=cb2388_c8;full_length_coverage=1;non_full_length_coverage=1;isoform_length=3379;expected_accuracy=0.998     | 1203 | 2534 | 1    | 1205 | 2048 | 337<br>9 | 8    | 121<br>7 |
| cb2737_c40/f1p0/2830                                                                                                                           | gnl BL_ORD_ID 68786 cb2737_c50/f1p0/3706                                                                                                                       | 1    | 1397 | 1395 | 2651 | 685  | 208<br>2 | 2214 | 346<br>6 |
| cb2458_c10/f1p1/2684<br>isoform=cb2458_c10;full_length_coverage=1;non_full_length_coverage=1;isoform_length=2684;expected_accuracy=0.992       | gnl BL_ORD_ID 37675 cb2458_c4/f2p1/2839<br>isoform=cb2458_c4;full_length_coverage=2;non_full_length_coverage=1;isoform_length=2839;expected_accuracy=0.994     | 379  | 2684 | 85   | 380  | 516  | 282<br>7 | 1    | 296      |
| cb13748_c4/f9p0/2089<br>isoform=cb13748_c4;full_length_coverage=9;non_full_length_coverage=0;isoform_length=2089;expected_accuracy=1.000       | gnl BL_ORD_ID 26479 cb13748_c60/f1p0/3166<br>isoform=cb13748_c60;full_length_coverage=1;non_full_length_coverage=0;isoform_length=3166;expected_accuracy=0.991 | 680  | 2072 | 76   | 682  | 1782 | 316<br>6 | 33   | 637      |

|                                                                                                                                                  |                                              |      |      |      |      |      |      |      |      |
|--------------------------------------------------------------------------------------------------------------------------------------------------|----------------------------------------------|------|------|------|------|------|------|------|------|
| cb8564_c182592/f1p0/2600<br>isoform=cb8564_c182592;full_length_coverage=1;non_full_length_coverage=0;isoform_length=2600;expected_accuracy=0.997 | gnl BL_ORD_ID 53022 cb8564_c114466/f1p0/3000 | 1    | 1582 | 1583 | 2586 | 8    | 1610 | 1943 | 2946 |
| cb1146_c14/f5p1/3802<br>isoform=cb1146_c14;full_length_coverage=5;non_full_length_coverage=1;isoform_length=3802;expected_accuracy=1.000         | gnl BL_ORD_ID 59189 cb1146_c4/f1p0/4749      | 1463 | 3802 | 111  | 1465 | 2017 | 4356 | 143  | 1497 |
| cb8564_c21808/f1p0/2228<br>isoform=cb8564_c18183;full_length_coverage=2;non_full_length_coverage=0;isoform_length=2268;expected_accuracy=0.999   | gnl BL_ORD_ID 13156 cb8564_c18183/f2p0/2268  | 1    | 1416 | 1415 | 2145 | 12   | 1431 | 1539 | 2268 |
| cb2926_c7/f2p0/2634<br>isoform=cb2926_c7;full_length_coverage=2;non_full_length_coverage=0;isoform_length=2634;expected_accuracy=0.993           | gnl BL_ORD_ID 38742 cb2926_c15/f1p0/2713     | 11   | 1791 | 1791 | 2610 | 8    | 1784 | 1884 | 2703 |
| cb7851_c0/f3p0/2191<br>isoform=cb7851_c0;full_length_coverage=3;non_full_length_coverage=0;isoform_length=2191;expected_accuracy=0.996           | gnl BL_ORD_ID 8228 cb7851_c1/f1p0/2518       | 1    | 1285 | 1285 | 2183 | 3    | 1306 | 1620 | 2518 |
| cb18456_c1988/f1p0/1112<br>isoform=cb8564_c73853;full_length_coverage=1;non_full_length_coverage=0;isoform_length=2443;expected_accuracy=1.000   | gnl BL_ORD_ID 67391 cb18456_c2087/f1p0/1448  | 412  | 1024 | 50   | 416  | 676  | 1288 | 5    | 371  |
| cb8564_c73853/f1p0/2443<br>isoform=cb8564_c73853;full_length_coverage=1;non_full_length_coverage=0;isoform_length=2443;expected_accuracy=1.000   | gnl BL_ORD_ID 56983 cb8564_c79327/f1p1/3074  | 1    | 1281 | 1276 | 2428 | 99   | 1375 | 1655 | 2814 |

|                                                                                                                                                |                                                                                                                                                                           |      |      |      |      |      |          |      |          |
|------------------------------------------------------------------------------------------------------------------------------------------------|---------------------------------------------------------------------------------------------------------------------------------------------------------------------------|------|------|------|------|------|----------|------|----------|
| cb653_c9/f1p0/4025<br>isoform=cb653_c9;full_length_coverage=1;non_full_length_coverage=0;isoform_length=4025;expected_accuracy=0.997           | gnl BL_ORD_ID 5915      cb653_c13/f1p2/4267<br>isoform=cb653_c13;full_length_coverage=1;non_full_length_coverage=2;isoform_length=4267;expected_accuracy=0.999            | 301  | 4024 | 1    | 301  | 473  | 419<br>1 | 6    | 295      |
| cb8564_c44698/f1p5/2843<br>isoform=cb8564_c44698;full_length_coverage=1;non_full_length_coverage=5;isoform_length=2843;expected_accuracy=0.997 | gnl BL_ORD_ID 54438      cb8564_c46124/f1p0/3383                                                                                                                          | 1    | 2516 | 2511 | 2836 | 151  | 266<br>3 | 2784 | 3114     |
| cb12931_c15/f1p0/1493<br>isoform=cb12931_c15;full_length_coverage=1;non_full_length_coverage=0;isoform_length=1493;expected_accuracy=1.000     | gnl BL_ORD_ID 13544      cb8564_c186356/f1p0/2744<br>isoform=cb8564_c186356;full_length_coverage=1;non_full_length_coverage=0;isoform_length=2744;expected_accuracy=0.998 | 1    | 1106 | 1104 | 1489 | 1    | 1102     | 2359 | 274<br>4 |
| cb12931_c15/f1p0/1493<br>isoform=cb12931_c15;full_length_coverage=1;non_full_length_coverage=0;isoform_length=1493;expected_accuracy=1.000     | gnl BL_ORD_ID 15154      cb8564_c32509/f1p1/2880<br>isoform=cb8564_c32509;full_length_coverage=1;non_full_length_coverage=1;isoform_length=2880;expected_accuracy=0.991   | 11   | 1106 | 1104 | 1467 | 2    | 1110     | 2509 | 287<br>7 |
| cb8564_c2810/f1p1/2785<br>isoform=cb8564_c2810;full_length_coverage=1;non_full_length_coverage=1;isoform_length=2785;expected_accuracy=0.996   | gnl BL_ORD_ID 14981      cb8564_c2811/f1p0/3018<br>isoform=cb8564_c2811;full_length_coverage=1;non_full_length_coverage=0;isoform_length=3018;expected_accuracy=0.997     | 1    | 1455 | 1456 | 2699 | 1    | 145<br>6 | 1773 | 301<br>8 |
| cb6106_c23/f14p0/1983<br>isoform=cb6106_c23;full_length_coverage=14;non_full_length_coverage=0;isoform_length=1983;expected_accuracy=1.000     | gnl BL_ORD_ID 45790      cb6106_c5/f1p0/2598<br>isoform=cb6106_c5;full_length_coverage=1;non_full_length_coverage=0;isoform_length=2598;expected_accuracy=0.997           | 1    | 1322 | 1319 | 1979 | 8    | 134<br>2 | 1935 | 259<br>8 |
| cb1049_c9/f1p0/2974<br>isoform=cb1049_c9;full_length_coverage=1;non_full_length_coverage=0;isoform_length=2974;expected_accuracy=1.000         | gnl BL_ORD_ID 47282      cb1049_c14/f1p0/3390                                                                                                                             | 1345 | 2974 | 10   | 1346 | 1500 | 313<br>4 | 56   | 139<br>7 |

|                                                                                                                      |                                                                                                                      |                          |     |      |      |      |     |      |      |      |  |
|----------------------------------------------------------------------------------------------------------------------|----------------------------------------------------------------------------------------------------------------------|--------------------------|-----|------|------|------|-----|------|------|------|--|
| ngth_coverage=0;isoform_length=2974;expected_accuracy=1.000                                                          |                                                                                                                      |                          |     |      |      |      |     |      |      |      |  |
| cb6816_c3/f1p0/1841                                                                                                  | gnl BL_ORD_ID 5381                                                                                                   | cb6816_c0/f1p0/2763      |     |      |      |      |     |      |      |      |  |
| isoform=cb6816_c3;full_length_coverage=1;non_full_length_coverage=0;isoform_length=1841;expected_accuracy=0.997      | isoform=cb6816_c0;full_length_coverage=1;non_full_length_coverage=0;isoform_length=2763;expected_accuracy=0.995      |                          | 1   | 1015 | 1010 | 1841 | 15  | 1029 | 1924 | 2755 |  |
| cb13877_c3/f1p0/1270                                                                                                 | gnl BL_ORD_ID 62848                                                                                                  | cb13877_c4/f1p0/1685     |     |      |      |      |     |      |      |      |  |
| isoform=cb13877_c3;full_length_coverage=1;non_full_length_coverage=0;isoform_length=1270;expected_accuracy=0.999     | isoform=cb13877_c4;full_length_coverage=1;non_full_length_coverage=0;isoform_length=1685;expected_accuracy=0.999     |                          | 247 | 1270 | 43   | 252  | 449 | 1472 | 46   | 257  |  |
| cb1178_c19/f1p0/1460                                                                                                 | gnl BL_ORD_ID 59233                                                                                                  | cb1178_c13/f1p0/2397     |     |      |      |      |     |      |      |      |  |
| isoform=cb1178_c19;full_length_coverage=1;non_full_length_coverage=0;isoform_length=1460;expected_accuracy=1.000     | isoform=cb1178_c13;full_length_coverage=1;non_full_length_coverage=0;isoform_length=2397;expected_accuracy=1.000     |                          | 387 | 1460 | 47   | 388  | 912 | 1985 | 3    | 343  |  |
| cb8564_c186356/f1p0/2744                                                                                             | gnl BL_ORD_ID 56602                                                                                                  | cb8564_c48192/f1p6/3029  |     |      |      |      |     |      |      |      |  |
| isoform=cb8564_c186356;full_length_coverage=1;non_full_length_coverage=0;isoform_length=2744;expected_accuracy=0.998 | isoform=cb8564_c48192;full_length_coverage=1;non_full_length_coverage=0;isoform_length=3029;expected_accuracy=0.998  |                          | 1   | 1396 | 1393 | 2744 | 1   | 1398 | 1518 | 2868 |  |
| cb8564_c109682/f3p0/2064                                                                                             | gnl BL_ORD_ID 10872                                                                                                  | cb8564_c117686/f1p0/2190 |     |      |      |      |     |      |      |      |  |
| isoform=cb8564_c109682;full_length_coverage=3;non_full_length_coverage=0;isoform_length=2064;expected_accuracy=1.000 | isoform=cb8564_c117686;full_length_coverage=1;non_full_length_coverage=0;isoform_length=2190;expected_accuracy=1.000 |                          | 530 | 2064 | 56   | 531  | 655 | 2189 | 1    | 476  |  |
| cb8564_c72639/f1p3/2409                                                                                              | gnl BL_ORD_ID 17615                                                                                                  | cb8564_c91506/f1p0/2592  |     |      |      |      |     |      |      |      |  |
| isoform=cb8564_c72639;full_length_coverage=1;non_full_length_coverage=3;isoform_length=2409;expected_accuracy=0.999  | isoform=cb8564_c91506;full_length_coverage=1;non_full_length_coverage=0;isoform_length=2592;expected_accuracy=0.994  |                          | 288 | 2400 | 8    | 289  | 479 | 2592 | 1    | 282  |  |



|                                                                                                                                                    |                                              |      |      |      |      |      |      |      |      |
|----------------------------------------------------------------------------------------------------------------------------------------------------|----------------------------------------------|------|------|------|------|------|------|------|------|
| cb8564_c132795/f5p10/3729<br>isoform=cb8564_c132795;full_length_coverage=5;non_full_length_coverage=10;isoform_length=3729;expected_accuracy=0.999 | gnl BL_ORD_ID 55725 cb8564_c5109/f1p0/3767   | 1    | 1832 | 1831 | 3618 | 1    | 1831 | 1950 | 3737 |
| cb8564_c43779/f1p0/3021<br>isoform=cb8564_c43779;full_length_coverage=1;non_full_length_coverage=0;isoform_length=3021;expected_accuracy=0.993     | gnl BL_ORD_ID 55502 cb8564_c43538/f1p0/3563  | 1    | 2344 | 2345 | 3021 | 2    | 2350 | 2506 | 3180 |
| cb13076_c20/f1p0/1742<br>isoform=cb13076_c20;full_length_coverage=1;non_full_length_coverage=0;isoform_length=1742;expected_accuracy=0.995         | gnl BL_ORD_ID 57982 cb8564_c85904/f1p1/2015  | 185  | 1742 | 70   | 184  | 301  | 1859 | 37   | 151  |
| cb8564_c953/f2p0/2607<br>isoform=cb8564_c953;full_length_coverage=2;non_full_length_coverage=0;isoform_length=2607;expected_accuracy=0.997         | gnl BL_ORD_ID 54954 cb8564_c3903/f1p1/2749   | 154  | 2539 | 1    | 154  | 381  | 2768 | 102  | 251  |
| cb8564_c145859/f2p0/2922<br>isoform=cb8564_c145859;full_length_coverage=2;non_full_length_coverage=0;isoform_length=2922;expected_accuracy=0.999   | gnl BL_ORD_ID 56809 cb8564_c72465/f1p0/4108  | 1    | 1672 | 1669 | 2922 | 6    | 1679 | 2646 | 3899 |
| cb8564_c158279/f2p4/3190<br>isoform=cb8564_c24054;full_length_coverage=1;non_full_length_coverage=0;isoform_length=3316;expected_accuracy=0.998    | gnl BL_ORD_ID 14233 cb8564_c24054/f1p0/3316  | 1420 | 3128 | 1    | 1422 | 1608 | 3316 | 5    | 1424 |
| cb8564_c1923/f1p0/2116<br>isoform=cb8564_c1923;full_length_coverage=1;non_full_length_coverage=0;isoform_length=2116;expected_accuracy=0.999       | gnl BL_ORD_ID 53544 cb8564_c128329/f1p0/2686 | 1    | 1776 | 1775 | 2116 | 1    | 1776 | 1950 | 2292 |

|                                                                 |                     |                         |                                                                                                                     |     |      |      |      |     |      |      |      |
|-----------------------------------------------------------------|---------------------|-------------------------|---------------------------------------------------------------------------------------------------------------------|-----|------|------|------|-----|------|------|------|
| l_length_coverage=0;isoform_length=2116;expected_accuracy=0.991 |                     |                         |                                                                                                                     |     |      |      |      |     |      |      |      |
| cb12362_c43/f1p0/1174                                           | gnl BL_ORD_ID 1903  | cb10045_c31/f1p0/1199   | isoform=cb10045_c31;full_length_coverage=1;non_full_length_coverage=0;isoform_length=1199;expected_accuracy=0.994   | 118 | 1014 | 4    | 119  | 258 | 1180 | 1    | 116  |
| cb8564_c14344/f1p0/2533                                         | gnl BL_ORD_ID 52842 | cb8564_c15468/f1p0/3015 | isoform=cb8564_c14344;full_length_coverage=1;non_full_length_coverage=0;isoform_length=2533;expected_accuracy=0.993 | 148 | 2454 | 1    | 151  | 512 | 2819 | 43   | 193  |
| cb4016_c33/f1p0/2507                                            | gnl BL_ORD_ID 40527 | cb4016_c6/f1p1/2956     | isoform=cb4016_c6;full_length_coverage=1;non_full_length_coverage=1;isoform_length=2956;expected_accuracy=0.996     | 207 | 2462 | 1    | 208  | 526 | 2780 | 23   | 227  |
| cb8996_c3/f1p0/1657                                             | gnl BL_ORD_ID 22059 | cb8996_c1/f1p0/2011     | isoform=cb8996_c3;full_length_coverage=1;non_full_length_coverage=0;isoform_length=1657;expected_accuracy=0.992     | 1   | 1129 | 1129 | 1657 | 1   | 1128 | 1367 | 1895 |
| cb6161_c7/f1p3/2184                                             | gnl BL_ORD_ID 46442 | cb6161_c4/f2p0/2920     | isoform=cb6161_c7;full_length_coverage=1;non_full_length_coverage=3;isoform_length=2184;expected_accuracy=0.990     | 162 | 2161 | 14   | 162  | 920 | 2920 | 1    | 148  |
| cb6657_c5/f1p1/2260                                             | gnl BL_ORD_ID 5662  | cb6657_c0/f1p1/2805     | isoform=cb6657_c5;full_length_coverage=1;non_full_length_coverage=1;isoform_length=2260;expected_accuracy=0.999     | 1   | 1808 | 1808 | 2258 | 3   | 1813 | 2232 | 2683 |

|                                                                                                                                                  |                                                                                                                                                                   |     |      |      |      |      |      |      |      |
|--------------------------------------------------------------------------------------------------------------------------------------------------|-------------------------------------------------------------------------------------------------------------------------------------------------------------------|-----|------|------|------|------|------|------|------|
| cb7085_c26/f1p0/1893<br>isoform=cb7085_c26;full_length_coverage=13;non_full_length_coverage=0;isoform_length=1893;expected_accuracy=1.000        | gnl BL_ORD_ID 4154      cb7085_c8/f1p0/2701<br>isoform=cb7085_c8;full_length_coverage=1;non_full_length_coverage=0;isoform_length=2701;expected_accuracy=0.996    | 539 | 1889 | 70   | 541  | 1349 | 2701 | 1    | 483  |
| cb8564_c107237/f5p1/2872<br>isoform=cb8564_c107237;full_length_coverage=5;non_full_length_coverage=1;isoform_length=2872;expected_accuracy=0.995 | gnl BL_ORD_ID 54964      cb8564_c4015/f1p0/3731                                                                                                                   | 1   | 2206 | 2205 | 2837 | 34   | 2239 | 3116 | 3748 |
| cb12972_c15/f1p0/1541<br>isoform=cb12972_c15;full_length_coverage=1;non_full_length_coverage=0;isoform_length=1541;expected_accuracy=0.996       | gnl BL_ORD_ID 62020      cb12972_c13/f1p0/1732                                                                                                                    | 295 | 1541 | 40   | 300  | 414  | 1651 | 1    | 261  |
| cb7214_c5/f1p0/1888<br>isoform=cb7214_c5;full_length_coverage=1;non_full_length_coverage=0;isoform_length=1888;expected_accuracy=0.994           | gnl BL_ORD_ID 8880      cb7214_c4/f1p0/2395<br>isoform=cb7214_c4;full_length_coverage=1;non_full_length_coverage=0;isoform_length=2395;expected_accuracy=0.999    | 244 | 1888 | 3    | 245  | 645  | 2310 | 21   | 263  |
| cb18646_c2/f1p5/6412<br>isoform=cb18646_c2;full_length_coverage=1;non_full_length_coverage=5;isoform_length=6412;expected_accuracy=0.997         | gnl BL_ORD_ID 34398      cb18646_c0/f2p2/6586<br>isoform=cb18646_c0;full_length_coverage=2;non_full_length_coverage=2;isoform_length=6586;expected_accuracy=0.999 | 2   | 6140 | 6139 | 6334 | 3    | 6158 | 6391 | 6586 |
| cb7942_c26/f1p0/1770<br>isoform=cb7942_c26;full_length_coverage=1;non_full_length_coverage=0;isoform_length=1770;expected_accuracy=0.993         | gnl BL_ORD_ID 6206      cb7942_c31/f5p0/2051<br>isoform=cb7942_c31;full_length_coverage=5;non_full_length_coverage=0;isoform_length=2051;expected_accuracy=0.993  | 250 | 1770 | 3    | 252  | 490  | 2012 | 34   | 283  |
| cb3818_c17/f1p0/2829<br>isoform=cb3818_c17;full_length_coverage=1;non_full_length_coverage=0;isoform_length=2829;expected_accuracy=0.993         | gnl BL_ORD_ID 40376      cb3818_c0/f3p0/2845<br>isoform=cb3818_c0;full_length_coverage=3;non_full_length_coverage=0;isoform_length=2845;expected_accuracy=0.993   | 543 | 2828 | 98   | 543  | 556  | 2845 | 1    | 448  |

|                                                                                                                                                                                                                                                                                                                                                                                                                                                                                                                                                                                                                                                                                                                |                                                                                                                                                                                                                                                                                                                                                                                                                                                                                                                                                                                                                                                                                                                                                                                                                                                                                                                                                                                                                                                                                   |     |      |      |      |      |      |      |      |
|----------------------------------------------------------------------------------------------------------------------------------------------------------------------------------------------------------------------------------------------------------------------------------------------------------------------------------------------------------------------------------------------------------------------------------------------------------------------------------------------------------------------------------------------------------------------------------------------------------------------------------------------------------------------------------------------------------------|-----------------------------------------------------------------------------------------------------------------------------------------------------------------------------------------------------------------------------------------------------------------------------------------------------------------------------------------------------------------------------------------------------------------------------------------------------------------------------------------------------------------------------------------------------------------------------------------------------------------------------------------------------------------------------------------------------------------------------------------------------------------------------------------------------------------------------------------------------------------------------------------------------------------------------------------------------------------------------------------------------------------------------------------------------------------------------------|-----|------|------|------|------|------|------|------|
| length_coverage=0;isoform_length=2829;expected_accuracy=0.996<br>cb6090_c5/f1p0/2373<br>isoform=cb6090_c5;full_length_coverage=1;non_full_length_coverage=0;isoform_length=2373;expected_accuracy=0.995<br>cb8564_c35935/f1p0/4149<br>isoform=cb8564_c35935;full_length_coverage=1;non_full_length_coverage=0;isoform_length=4149;expected_accuracy=0.993<br>cb3603_c18/f1p1/2591<br>cb8564_c163547/f1p1/2420<br>isoform=cb8564_c163547;full_length_coverage=1;non_full_length_coverage=1;isoform_length=2420;expected_accuracy=0.994<br>cb8564_c2608/f1p0/2317<br>isoform=cb8564_c2608;full_length_coverage=1;non_full_length_coverage=0;isoform_length=2317;expected_accuracy=0.998<br>cb12341_c15/f1p0/1821 | length_coverage=0;isoform_length=2845;expected_accuracy=1.000<br>gnl BL_ORD_ID 44623                      cb6090_c1/f1p0/2937<br>isoform=cb6090_c1;full_length_coverage=1;non_full_length_coverage=0;isoform_length=2937;expected_accuracy=0.997<br>gnl BL_ORD_ID 16628                      cb8564_c47737/f7p5/4351<br>isoform=cb8564_c47737;full_length_coverage=7;non_full_length_coverage=5;isoform_length=4351;expected_accuracy=0.998<br>gnl BL_ORD_ID 39360                      cb3603_c17/f1p3/3266<br>isoform=cb3603_c17;full_length_coverage=1;non_full_length_coverage=3;isoform_length=3266;expected_accuracy=0.994<br>gnl BL_ORD_ID 16111                      cb8564_c75565/f1p1/2477<br>isoform=cb8564_c75565;full_length_coverage=1;non_full_length_coverage=1;isoform_length=2477;expected_accuracy=0.995<br>gnl BL_ORD_ID 54786                      cb8564_c2612/f1p0/3007<br>gnl BL_ORD_ID 43183                      cb5118_c1/f5p8/3138<br>isoform=cb5118_c1;full_length_coverage=5;non_full_length_coverage=8;isoform_length=3138;expected_accuracy=1.000 | 1   | 1689 | 1691 | 2371 | 4    | 1685 | 2268 | 2937 |
|                                                                                                                                                                                                                                                                                                                                                                                                                                                                                                                                                                                                                                                                                                                |                                                                                                                                                                                                                                                                                                                                                                                                                                                                                                                                                                                                                                                                                                                                                                                                                                                                                                                                                                                                                                                                                   | 291 | 4149 | 1    | 295  | 395  | 4273 | 1    | 290  |
|                                                                                                                                                                                                                                                                                                                                                                                                                                                                                                                                                                                                                                                                                                                |                                                                                                                                                                                                                                                                                                                                                                                                                                                                                                                                                                                                                                                                                                                                                                                                                                                                                                                                                                                                                                                                                   | 201 | 2586 | 2    | 201  | 795  | 3180 | 1    | 196  |
|                                                                                                                                                                                                                                                                                                                                                                                                                                                                                                                                                                                                                                                                                                                |                                                                                                                                                                                                                                                                                                                                                                                                                                                                                                                                                                                                                                                                                                                                                                                                                                                                                                                                                                                                                                                                                   | 543 | 2419 | 66   | 547  | 607  | 2477 | 7    | 488  |
|                                                                                                                                                                                                                                                                                                                                                                                                                                                                                                                                                                                                                                                                                                                |                                                                                                                                                                                                                                                                                                                                                                                                                                                                                                                                                                                                                                                                                                                                                                                                                                                                                                                                                                                                                                                                                   | 1   | 1346 | 1345 | 2317 | 1    | 1343 | 1930 | 2903 |
|                                                                                                                                                                                                                                                                                                                                                                                                                                                                                                                                                                                                                                                                                                                |                                                                                                                                                                                                                                                                                                                                                                                                                                                                                                                                                                                                                                                                                                                                                                                                                                                                                                                                                                                                                                                                                   | 99  | 1595 | 1    | 101  | 1628 | 3124 | 1    | 97   |

|                                                                                                                     |                                                                                                                    |      |      |      |      |      |      |      |     |
|---------------------------------------------------------------------------------------------------------------------|--------------------------------------------------------------------------------------------------------------------|------|------|------|------|------|------|------|-----|
| cb8564_c76734/f1p0/3758                                                                                             | gnl BL_ORD_ID 57198 cb8564_c86412/f1p0/4137                                                                        | 1    | 3013 | 3013 | 3419 | 169  | 318  | 3496 | 390 |
| cb15168_c1/f1p0/1570                                                                                                |                                                                                                                    |      |      |      |      |      | 1    |      | 1   |
| isoform=cb15168_c1;full_length_coverage=1;non_full_length_coverage=0;isoform_length=1570;expected_accuracy=0.993    | gnl BL_ORD_ID 64500 cb15168_c4/f1p0/1841                                                                           | 1    | 1205 | 1202 | 1570 | 51   | 125  | 1355 | 172 |
|                                                                                                                     |                                                                                                                    |      |      |      |      |      | 5    |      | 3   |
| cb3256_c4/f1p0/2358                                                                                                 | gnl BL_ORD_ID 40771 cb3256_c0/f1p0/3673                                                                            |      |      |      |      |      |      |      |     |
| isoform=cb3256_c4;full_length_coverage=1;non_full_length_coverage=0;isoform_length=2358;expected_accuracy=0.995     | isoform=cb3256_c0;full_length_coverage=1;non_full_length_coverage=0;isoform_length=3673;expected_accuracy=0.998    | 1142 | 2289 | 1    | 1145 | 2529 | 367  | 227  | 136 |
|                                                                                                                     |                                                                                                                    |      |      |      |      |      | 3    |      | 8   |
| cb8564_c129638/f1p0/2479                                                                                            | gnl BL_ORD_ID 52261 cb8564_c116055/f1p0/3385                                                                       | 1    | 1627 | 1623 | 2475 | 34   | 166  | 2065 | 291 |
|                                                                                                                     |                                                                                                                    |      |      |      |      |      | 0    |      | 7   |
| cb8564_c34518/f1p0/3136                                                                                             |                                                                                                                    |      |      |      |      |      |      |      |     |
| isoform=cb8564_c34518;full_length_coverage=1;non_full_length_coverage=0;isoform_length=3136;expected_accuracy=0.991 | gnl BL_ORD_ID 55939 cb8564_c49630/f1p4/3487                                                                        | 2    | 2882 | 2882 | 3126 | 1    | 291  | 3243 | 349 |
|                                                                                                                     |                                                                                                                    |      |      |      |      |      | 3    |      | 3   |
|                                                                                                                     | gnl BL_ORD_ID 5047 cb6518_c9/f1p1/3889                                                                             |      |      |      |      |      |      |      |     |
| cb6518_c7/f1p0/2783                                                                                                 | isoform=cb6518_c9;full_length_coverage=1;non_full_length_coverage=1;isoform_length=3889;expected_accuracy=0.997    | 1    | 1809 | 1807 | 2725 | 5    | 1811 | 2918 | 383 |
|                                                                                                                     |                                                                                                                    |      |      |      |      |      |      |      | 6   |
| cb14637_c3/f1p0/1759                                                                                                | gnl BL_ORD_ID 16851 cb8564_c4800/f2p0/3854                                                                         |      |      |      |      |      |      |      |     |
| isoform=cb14637_c3;full_length_coverage=1;non_full_length_coverage=0;isoform_length=1759;expected_accuracy=1.000    | isoform=cb8564_c4800;full_length_coverage=2;non_full_length_coverage=0;isoform_length=3854;expected_accuracy=0.996 | 1    | 1385 | 1384 | 1713 | 736  | 212  | 3523 | 385 |
|                                                                                                                     |                                                                                                                    |      |      |      |      |      | 2    |      | 4   |
| cb6217_c5/f2p1/2238                                                                                                 | gnl BL_ORD_ID 5726 cb6217_c4/f3p0/2549                                                                             |      |      |      |      |      |      |      |     |
| isoform=cb6217_c5;full_length_coverage=2;non_full_length_coverage=0;isoform_length=2238;expected_accuracy=0.999     | isoform=cb6217_c4;full_length_coverage=3;non_full_length_coverage=0;isoform_length=2549;expected_accuracy=0.999    | 150  | 2238 | 1    | 151  | 284  | 237  | 5    | 155 |
|                                                                                                                     |                                                                                                                    |      |      |      |      |      | 2    |      |     |

|                                                                                                                                                                                                                                                                                                                                                                                                                                        |                                                                                                                                                                                                                                                                                                                                                                                                                                                                                                                                                                              |     |      |      |      |      |     |      |     |
|----------------------------------------------------------------------------------------------------------------------------------------------------------------------------------------------------------------------------------------------------------------------------------------------------------------------------------------------------------------------------------------------------------------------------------------|------------------------------------------------------------------------------------------------------------------------------------------------------------------------------------------------------------------------------------------------------------------------------------------------------------------------------------------------------------------------------------------------------------------------------------------------------------------------------------------------------------------------------------------------------------------------------|-----|------|------|------|------|-----|------|-----|
| ngth_coverage=1;isoform_length=2238;expected_accuracy=0.999<br>cb8564_c7774/f3p4/1962<br>isoform=cb8564_c7774;full_length_coverage=3;non_full_length_coverage=4;isoform_length=1962;expected_accuracy=1.000<br>cb9467_c9/f6p0/2182<br>isoform=cb9467_c9;full_length_coverage=6;non_full_length_coverage=0;isoform_length=2182;expected_accuracy=1.000<br>cb875_c3/f1p0/4771                                                            | ngth_coverage=0;isoform_length=2549;expected_accuracy=1.000<br>gnl BL_ORD_ID 16481      cb8564_c5089/f1p0/2122<br>isoform=cb8564_c5089;full_length_coverage=1;non_full_length_coverage=0;isoform_length=2122;expected_accuracy=0.995<br>gnl BL_ORD_ID 21567      cb9467_c27/f1p0/2294<br>isoform=cb9467_c27;full_length_coverage=1;non_full_length_coverage=0;isoform_length=2294;expected_accuracy=0.999<br>gnl BL_ORD_ID 19102      cb875_c20/f1p3/6635<br>isoform=cb875_c20;full_length_coverage=1;non_full_length_coverage=3;isoform_length=6635;expected_accuracy=0.997 | 1   | 1462 | 1457 | 1880 | 12   | 147 | 1699 | 212 |
| cb3603_c31/f1p0/4927<br>isoform=cb3603_c31;full_length_coverage=1;non_full_length_coverage=0;isoform_length=4927;expected_accuracy=0.996<br>cb8564_c87256/f1p0/2285<br>isoform=cb8564_c87256;full_length_coverage=1;non_full_length_coverage=0;isoform_length=2285;expected_accuracy=0.992<br>cb5057_c18/f1p0/1420<br>isoform=cb5057_c18;full_length_coverage=1;non_full_length_coverage=0;isoform_length=1420;expected_accuracy=0.992 | gnl BL_ORD_ID 40851      cb3603_c41/f1p0/5154<br>isoform=cb3603_c41;full_length_coverage=1;non_full_length_coverage=0;isoform_length=5154;expected_accuracy=0.997<br>gnl BL_ORD_ID 11500      cb8564_c14546/f1p5/3300<br>isoform=cb8564_c14546;full_length_coverage=1;non_full_length_coverage=5;isoform_length=3300;expected_accuracy=0.996<br>gnl BL_ORD_ID 41939      cb5057_c2/f3p0/1613<br>isoform=cb5057_c2;full_length_coverage=3;non_full_length_coverage=0;isoform_length=1613;expected_accuracy=1.000                                                              | 165 | 2105 | 1    | 166  | 352  | 229 | 3    | 169 |
| cb875_c3/f1p0/4771                                                                                                                                                                                                                                                                                                                                                                                                                     | gnl BL_ORD_ID 19102      cb875_c20/f1p3/6635<br>isoform=cb875_c20;full_length_coverage=1;non_full_length_coverage=3;isoform_length=6635;expected_accuracy=0.997                                                                                                                                                                                                                                                                                                                                                                                                              | 1   | 3236 | 3234 | 4726 | 1030 | 426 | 5145 | 663 |
| cb3603_c31/f1p0/4927<br>isoform=cb3603_c31;full_length_coverage=1;non_full_length_coverage=0;isoform_length=4927;expected_accuracy=0.996<br>cb8564_c87256/f1p0/2285<br>isoform=cb8564_c87256;full_length_coverage=1;non_full_length_coverage=0;isoform_length=2285;expected_accuracy=0.992<br>cb5057_c18/f1p0/1420<br>isoform=cb5057_c18;full_length_coverage=1;non_full_length_coverage=0;isoform_length=1420;expected_accuracy=0.992 | gnl BL_ORD_ID 40851      cb3603_c41/f1p0/5154<br>isoform=cb3603_c41;full_length_coverage=1;non_full_length_coverage=0;isoform_length=5154;expected_accuracy=0.997<br>gnl BL_ORD_ID 11500      cb8564_c14546/f1p5/3300<br>isoform=cb8564_c14546;full_length_coverage=1;non_full_length_coverage=5;isoform_length=3300;expected_accuracy=0.996<br>gnl BL_ORD_ID 41939      cb5057_c2/f3p0/1613<br>isoform=cb5057_c2;full_length_coverage=3;non_full_length_coverage=0;isoform_length=1613;expected_accuracy=1.000                                                              | 201 | 4914 | 1    | 201  | 447  | 515 | 1    | 202 |
| cb8564_c87256/f1p0/2285<br>isoform=cb8564_c87256;full_length_coverage=1;non_full_length_coverage=0;isoform_length=2285;expected_accuracy=0.992<br>cb5057_c18/f1p0/1420<br>isoform=cb5057_c18;full_length_coverage=1;non_full_length_coverage=0;isoform_length=1420;expected_accuracy=0.992                                                                                                                                             | gnl BL_ORD_ID 11500      cb8564_c14546/f1p5/3300<br>isoform=cb8564_c14546;full_length_coverage=1;non_full_length_coverage=5;isoform_length=3300;expected_accuracy=0.996<br>gnl BL_ORD_ID 41939      cb5057_c2/f3p0/1613<br>isoform=cb5057_c2;full_length_coverage=3;non_full_length_coverage=0;isoform_length=1613;expected_accuracy=1.000                                                                                                                                                                                                                                   | 1   | 1703 | 1700 | 2285 | 834  | 253 | 2671 | 326 |
| cb5057_c18/f1p0/1420<br>isoform=cb5057_c18;full_length_coverage=1;non_full_length_coverage=0;isoform_length=1420;expected_accuracy=0.992                                                                                                                                                                                                                                                                                               | gnl BL_ORD_ID 41939      cb5057_c2/f3p0/1613<br>isoform=cb5057_c2;full_length_coverage=3;non_full_length_coverage=0;isoform_length=1613;expected_accuracy=1.000                                                                                                                                                                                                                                                                                                                                                                                                              | 1   | 1020 | 1016 | 1420 | 1    | 102 | 1187 | 161 |

|                                                                                                                                                |                                                                                                                                                                         |     |      |      |      |     |      |      |      |
|------------------------------------------------------------------------------------------------------------------------------------------------|-------------------------------------------------------------------------------------------------------------------------------------------------------------------------|-----|------|------|------|-----|------|------|------|
| cb4877_c1/f2p1/2369<br>isoform=cb4877_c1;full_length_coverage=2;non_full_length_coverage=1;isoform_length=2369;expected_accuracy=1.000         | gnl BL_ORD_ID 42790      cb4877_c3/f1p0/2888<br>isoform=cb4877_c3;full_length_coverage=1;non_full_length_coverage=0;isoform_length=2888;expected_accuracy=0.996         | 1   | 1435 | 1434 | 2334 | 4   | 1438 | 1989 | 2888 |
| cb6217_c5/f2p1/2238<br>isoform=cb6217_c5;full_length_coverage=2;non_full_length_coverage=1;isoform_length=2238;expected_accuracy=0.999         | gnl BL_ORD_ID 49539      cb6217_c35/f1p0/2092                                                                                                                           | 150 | 2199 | 1    | 151  | 283 | 2306 | 4    | 154  |
| cb964_c1/f1p0/4546                                                                                                                             | gnl BL_ORD_ID 59142      cb964_c19/f1p0/4670                                                                                                                            | 1   | 2394 | 2393 | 4166 | 87  | 2481 | 2626 | 4399 |
| cb5460_c5/f1p0/3237                                                                                                                            | gnl BL_ORD_ID 73948      cb5460_c9/f1p1/2896                                                                                                                            | 18  | 2102 | 2098 | 2788 | 11  | 2095 | 2217 | 2906 |
| cb5487_c6/f1p1/2539                                                                                                                            | gnl BL_ORD_ID 73975      cb5487_c11/f1p0/2702                                                                                                                           | 1   | 1465 | 1465 | 2490 | 13  | 1477 | 1646 | 2671 |
| cb8564_c36689/f1p1/2368<br>isoform=cb8564_c36689;full_length_coverage=1;non_full_length_coverage=1;isoform_length=2368;expected_accuracy=0.991 | gnl BL_ORD_ID 14368      cb8564_c34638/f1p0/2817<br>isoform=cb8564_c34638;full_length_coverage=1;non_full_length_coverage=0;isoform_length=2817;expected_accuracy=0.992 | 1   | 1709 | 1706 | 2368 | 1   | 1662 | 2158 | 2813 |
| cb7851_c0/f3p0/2191<br>isoform=cb7851_c0;full_length_coverage=3;non_full_length_coverage=0;isoform_length=2191;expected_accuracy=0.996         | gnl BL_ORD_ID 8230      cb7851_c3/f1p0/2493<br>isoform=cb7851_c3;full_length_coverage=1;non_full_length_coverage=0;isoform_length=2493;expected_accuracy=0.991          | 1   | 1285 | 1285 | 2180 | 5   | 1284 | 1598 | 2492 |
| cb8564_c34060/f2p0/3214<br>isoform=cb8564_c34060;full_length_coverage=2;non_full_length_coverage=0;isoform_length=3214;expected_accuracy=0.993 | gnl BL_ORD_ID 16149      cb8564_c47162/f1p0/3361<br>isoform=cb8564_c47162;full_length_coverage=1;non_full_length_coverage=0;isoform_length=3361;expected_accuracy=0.996 | 433 | 3214 | 6    | 434  | 592 | 3361 | 1    | 402  |

|                                                                                                                                                  |                                               |     |      |      |      |      |          |      |          |
|--------------------------------------------------------------------------------------------------------------------------------------------------|-----------------------------------------------|-----|------|------|------|------|----------|------|----------|
| cb8564_c69192/f2p0/4443<br>isoform=cb8564_c69192;full_length_coverage=2;non_full_length_coverage=0;isoform_length=4443;expected_accuracy=0.996   | gnl BL_ORD_ID 67930 cb18656_c10/f1p0/5311     | 1   | 3966 | 3967 | 4443 | 123  | 410<br>2 | 4852 | 532<br>5 |
| cb8564_c183213/f1p3/3190<br>isoform=cb8564_c183213;full_length_coverage=1;non_full_length_coverage=3;isoform_length=3190;expected_accuracy=0.999 | gnl BL_ORD_ID 57083 cb8564_c82622/f1p0/3597   | 1   | 2313 | 2318 | 3190 | 3    | 231<br>5 | 2596 | 346<br>8 |
| cb16508_c2/f1p0/1556<br>isoform=cb16508_c1;full_length_coverage=1;non_full_length_coverage=0;isoform_length=1732;expected_accuracy=1.000         | gnl BL_ORD_ID 32526 cb16508_c1/f1p0/1732      | 248 | 1552 | 33   | 247  | 406  | 171<br>0 | 17   | 224      |
| cb18456_c7297/f1p0/1408<br>isoform=cb8564_c122762;full_length_coverage=1;non_full_length_coverage=4;isoform_length=2270;expected_accuracy=0.992  | gnl BL_ORD_ID 11779 cb8564_c122762/f1p4/2270  | 520 | 1342 | 7    | 519  | 1453 | 227<br>0 | 6    | 529      |
| cb8564_c40764/f1p0/2563<br>isoform=cb8564_c40764;full_length_coverage=1;non_full_length_coverage=0;isoform_length=2563;expected_accuracy=0.997   | gnl BL_ORD_ID 15496 cb8564_c47853/f1p0/2927   | 1   | 2167 | 2162 | 2563 | 1    | 214<br>5 | 2353 | 275<br>2 |
| cb2155_c26/f5p0/2830<br>isoform=cb2155_c26;full_length_coverage=5;non_full_length_coverage=0;isoform_length=2830;expected_accuracy=1.000         | gnl BL_ORD_ID 66760 cb2155_c21/f1p0/3343      | 1   | 1729 | 1727 | 2795 | 1    | 173<br>1 | 2240 | 331<br>8 |
| cb8564_c15653/f1p4/2475<br>isoform=cb8564_c15653;full_length_coverage=1;non_full_length_coverage=0;isoform_length=2475;expected_accuracy=0.999   | gnl BL_ORD_ID 54449 cb8564_c122906/f2p13/2871 | 22  | 2293 | 2289 | 2482 | 166  | 243<br>7 | 2656 | 284<br>9 |



|                                                                                                                  |                                                                                                                      |      |      |      |      |      |     |      |     |
|------------------------------------------------------------------------------------------------------------------|----------------------------------------------------------------------------------------------------------------------|------|------|------|------|------|-----|------|-----|
| cb8564_c13467/f1p0/3088                                                                                          | gnl BL_ORD_ID 54145 cb8564_c19339/f1p1/3362                                                                          | 17   | 2494 | 2494 | 3219 | 27   | 250 | 2612 | 333 |
|                                                                                                                  |                                                                                                                      |      |      |      |      |      | 1   |      | 7   |
| cb5290_c43/f1p0/2774                                                                                             | gnl BL_ORD_ID 73390 cb5290_c40/f1p0/2998                                                                             | 235  | 2691 | 1    | 236  | 379  | 283 | 4    | 246 |
|                                                                                                                  |                                                                                                                      |      |      |      |      |      | 5   |      |     |
| cb4798_c33/f4p0/1530                                                                                             | gnl BL_ORD_ID 43886 cb4798_c18/f1p0/1786                                                                             |      |      |      |      |      |     |      |     |
| isoform=cb4798_c33;full_length_coverage=4;non_full_length_coverage=0;isoform_length=1530;expected_accuracy=1.000 | isoform=cb4798_c18;full_length_coverage=1;non_full_length_coverage=0;isoform_length=1786;expected_accuracy=0.996     | 515  | 1530 | 58   | 516  | 770  | 178 | 1    | 459 |
|                                                                                                                  |                                                                                                                      |      |      |      |      |      | 5   |      |     |
| cb3192_c10/f1p0/3250                                                                                             | gnl BL_ORD_ID 38500 cb3192_c13/f1p1/3411                                                                             |      |      |      |      |      |     |      |     |
| isoform=cb3192_c10;full_length_coverage=1;non_full_length_coverage=0;isoform_length=3250;expected_accuracy=0.998 | isoform=cb3192_c13;full_length_coverage=1;non_full_length_coverage=1;isoform_length=3411;expected_accuracy=0.996     | 1112 | 3250 | 105  | 1114 | 1242 | 337 | 13   | 101 |
|                                                                                                                  |                                                                                                                      |      |      |      |      |      | 9   |      | 3   |
| cb3010_c8/f1p0/2925                                                                                              | gnl BL_ORD_ID 38462 cb3010_c9/f1p0/3027                                                                              |      |      |      |      |      |     |      |     |
| isoform=cb3010_c8;full_length_coverage=1;non_full_length_coverage=0;isoform_length=2925;expected_accuracy=0.998  | isoform=cb3010_c9;full_length_coverage=1;non_full_length_coverage=0;isoform_length=3027;expected_accuracy=0.994      | 1422 | 2908 | 1    | 1423 | 1552 | 302 | 4    | 142 |
|                                                                                                                  |                                                                                                                      |      |      |      |      |      | 7   |      | 2   |
| cb3576_c15/f1p0/3129                                                                                             | gnl BL_ORD_ID 41526 cb3576_c2/f1p0/3257                                                                              |      |      |      |      |      |     |      |     |
| isoform=cb3576_c15;full_length_coverage=1;non_full_length_coverage=0;isoform_length=3129;expected_accuracy=0.994 | isoform=cb3576_c2;full_length_coverage=1;non_full_length_coverage=0;isoform_length=3257;expected_accuracy=0.997      | 165  | 3129 | 1    | 165  | 266  | 325 | 1    | 165 |
|                                                                                                                  |                                                                                                                      |      |      |      |      |      | 7   |      |     |
| cb8564_c4679/f1p1/2608                                                                                           | gnl BL_ORD_ID 12101 cb8564_c126062/f1p2/2804                                                                         |      |      |      |      |      |     |      |     |
|                                                                                                                  | isoform=cb8564_c126062;full_length_coverage=1;non_full_length_coverage=2;isoform_length=2804;expected_accuracy=0.992 | 251  | 2604 | 11   | 250  | 425  | 277 | 8    | 247 |
|                                                                                                                  |                                                                                                                      |      |      |      |      |      | 4   |      |     |
| cb8564_c18821/f1p0/2573                                                                                          | gnl BL_ORD_ID 55760 cb8564_c24919/f1p0/3395                                                                          |      |      |      |      |      |     |      |     |
| isoform=cb8564_c18821;full_length_coverage=1;non_f                                                               |                                                                                                                      | 1    | 1625 | 1625 | 2555 | 537  | 216 | 2299 | 322 |
|                                                                                                                  |                                                                                                                      |      |      |      |      |      | 1   |      | 9   |

|                                                                   |                     |                         |                                                                                                                     |      |      |      |      |      |      |      |      |
|-------------------------------------------------------------------|---------------------|-------------------------|---------------------------------------------------------------------------------------------------------------------|------|------|------|------|------|------|------|------|
| ull_length_coverage=0;isoform_length=2573;expected_accuracy=0.996 |                     |                         |                                                                                                                     |      |      |      |      |      |      |      |      |
| cb9230_c4/f1p1/1857                                               | gnl BL_ORD_ID 19941 | cb9230_c2/f1p1/2148     | isoform=cb9230_c2;full_length_coverage=1;non_full_length_coverage=1;isoform_length=2148;expected_accuracy=0.991     | 154  | 1741 | 1    | 155  | 557  | 2148 | 13   | 168  |
| cb8564_c13864/f2p1/3092                                           | gnl BL_ORD_ID 13369 | cb8564_c18803/f2p0/3233 | isoform=cb8564_c13864;full_length_coverage=2;non_full_length_coverage=1;isoform_length=3092;expected_accuracy=0.996 | 1101 | 3090 | 1    | 1101 | 1246 | 3233 | 1    | 1102 |
| cb8564_c37361/f1p0/3076                                           | gnl BL_ORD_ID 55910 | cb8564_c48645/f1p1/3287 |                                                                                                                     | 11   | 2481 | 2477 | 3005 | 17   | 2484 | 2585 | 3113 |
| cb8564_c39136/f1p0/3036                                           | gnl BL_ORD_ID 55600 | cb8564_c46484/f1p0/3151 | isoform=cb8564_c39136;full_length_coverage=1;non_full_length_coverage=0;isoform_length=3036;expected_accuracy=0.998 | 101  | 2089 | 2085 | 3036 | 5    | 2018 | 2145 | 3097 |
| cb8564_c86566/f1p0/2178                                           | gnl BL_ORD_ID 19138 | cb8564_c80714/f1p1/2608 | isoform=cb8564_c80714;full_length_coverage=1;non_full_length_coverage=1;isoform_length=2608;expected_accuracy=0.995 | 384  | 2194 | 7    | 389  | 571  | 2379 | 40   | 422  |
| cb7837_c0/f3p0/2227                                               | gnl BL_ORD_ID 7423  | cb7837_c1/f2p0/2384     | isoform=cb7837_c0;full_length_coverage=3;non_full_length_coverage=0;isoform_length=2227;expected_accuracy=1.000     | 112  | 2226 | 1    | 112  | 272  | 2384 | 52   | 162  |
| cb8564_c4541/f3p0/2161                                            | gnl BL_ORD_ID 14171 | cb8564_c4536/f1p0/3069  | isoform=cb8564_c4541;full_length_coverage=3;non_full_length_coverage=0;isoform_length=2161;expected_accuracy=1.000  | 1    | 1286 | 1284 | 2161 | 1    | 1281 | 2148 | 3024 |

|                                                                 |                                                                                                                                                                         |      |      |      |      |      |          |      |          |  |
|-----------------------------------------------------------------|-------------------------------------------------------------------------------------------------------------------------------------------------------------------------|------|------|------|------|------|----------|------|----------|--|
| l_length_coverage=0;isoform_length=2161;expected_accuracy=0.992 | l_length_coverage=0;isoform_length=3069;expected_accuracy=0.993                                                                                                         |      |      |      |      |      |          |      |          |  |
| cb1524_c18/f1p0/3747                                            | gnl BL_ORD_ID 28439      cb1524_c30/f1p0/3792<br>isoform=cb1524_c30;full_length_coverage=1;non_full_length_coverage=0;isoform_length=3792;expected_accuracy=0.994       | 153  | 3577 | 1    | 152  | 366  | 379<br>2 | 4    | 156      |  |
| cb8564_c77080/f1p0/2613                                         | gnl BL_ORD_ID 18501      cb8564_c86501/f1p2/2948<br>isoform=cb8564_c77080;full_length_coverage=1;non_full_length_coverage=0;isoform_length=2613;expected_accuracy=0.995 | 1    | 2048 | 2043 | 2613 | 27   | 206<br>4 | 2245 | 281<br>5 |  |
| cb8564_c15053/f1p0/3444                                         | gnl BL_ORD_ID 11890      cb8564_c13642/f1p0/3657<br>isoform=cb8564_c13642;full_length_coverage=1;non_full_length_coverage=0;isoform_length=3657;expected_accuracy=0.996 | 1635 | 3361 | 1    | 1636 | 1810 | 353<br>5 | 22   | 165<br>3 |  |
| cb8564_c43779/f1p0/3021                                         | gnl BL_ORD_ID 56002      cb8564_c51722/f1p1/3503<br>isoform=cb8564_c43779;full_length_coverage=1;non_full_length_coverage=0;isoform_length=3021;expected_accuracy=0.993 | 21   | 2344 | 2345 | 3021 | 67   | 238<br>6 | 2542 | 321<br>6 |  |
| cb693_c5/f1p0/2880                                              | gnl BL_ORD_ID 4971      cb693_c3/f1p0/3671<br>isoform=cb693_c3;full_length_coverage=1;non_full_length_coverage=0;isoform_length=3671;expected_accuracy=0.995            | 1    | 2434 | 2435 | 2810 | 45   | 249<br>7 | 3296 | 367<br>1 |  |
| cb8564_c40764/f1p0/2563                                         | gnl BL_ORD_ID 55920      cb8564_c48949/f1p0/4357<br>isoform=cb8564_c40764;full_length_coverage=1;non_full_length_coverage=0;isoform_length=2563;expected_accuracy=0.997 | 1    | 2166 | 2162 | 2563 | 2    | 216<br>6 | 2928 | 332<br>6 |  |

|                                                                                                                                                |                                                                                                                                                                         |    |      |      |      |     |          |      |          |
|------------------------------------------------------------------------------------------------------------------------------------------------|-------------------------------------------------------------------------------------------------------------------------------------------------------------------------|----|------|------|------|-----|----------|------|----------|
| cb5659_c81/f1p0/2132<br>isoform=cb5659_c81;full_length_coverage=1;non_full_length_coverage=0;isoform_length=2132;expected_accuracy=0.999       | gnl BL_ORD_ID 45302      cb5659_c105/f4p0/2776<br>isoform=cb5659_c105;full_length_coverage=4;non_full_length_coverage=0;isoform_length=2776;expected_accuracy=1.000     | 1  | 1656 | 1653 | 2083 | 136 | 178<br>7 | 2346 | 277<br>6 |
| cb8564_c82549/f1p0/2302                                                                                                                        | gnl BL_ORD_ID 53232      cb8564_c119499/f1p2/2534                                                                                                                       | 11 | 1185 | 1181 | 2154 | 8   | 1184     | 1356 | 232<br>9 |
| cb3132_c0/f2p0/1470<br>isoform=cb3132_c0;full_length_coverage=2;non_full_length_coverage=0;isoform_length=1470;expected_accuracy=0.998         | gnl BL_ORD_ID 38055      cb3132_c2/f2p0/3713<br>isoform=cb3132_c2;full_length_coverage=2;non_full_length_coverage=0;isoform_length=3713;expected_accuracy=0.997         | 1  | 1075 | 1075 | 1470 | 1   | 107<br>1 | 1190 | 158<br>3 |
| cb8422_c13/f3p0/2035<br>isoform=cb8422_c13;full_length_coverage=3;non_full_length_coverage=0;isoform_length=2035;expected_accuracy=1.000       | gnl BL_ORD_ID 11122      cb8422_c8/f1p0/2339<br>isoform=cb8422_c8;full_length_coverage=1;non_full_length_coverage=0;isoform_length=2339;expected_accuracy=0.993         | 1  | 1516 | 1514 | 1978 | 3   | 151<br>4 | 1874 | 233<br>9 |
| cb8564_c83100/f1p1/2671<br>isoform=cb8564_c83100;full_length_coverage=1;non_full_length_coverage=1;isoform_length=2671;expected_accuracy=0.996 | gnl BL_ORD_ID 57891      cb8564_c83487/f1p0/3257                                                                                                                        | 11 | 1637 | 1637 | 2631 | 12  | 163<br>9 | 2005 | 299<br>3 |
| cb5046_c5/f1p0/1852                                                                                                                            | gnl BL_ORD_ID 72091      cb5046_c4/f1p0/2918                                                                                                                            | 1  | 1248 | 1245 | 1842 | 538 | 178<br>5 | 2112 | 270<br>9 |
| cb8564_c44286/f1p0/2747                                                                                                                        | gnl BL_ORD_ID 56381      cb8564_c75626/f1p2/3199                                                                                                                        | 2  | 2121 | 2119 | 2665 | 4   | 2116     | 2611 | 315<br>7 |
| cb8564_c39824/f1p0/3319<br>isoform=cb8564_c39824;full_length_coverage=1;non_full_length_coverage=0;isoform_length=3319;expected_accuracy=1.000 | gnl BL_ORD_ID 14377      cb8564_c36097/f1p2/3430<br>isoform=cb8564_c36097;full_length_coverage=1;non_full_length_coverage=2;isoform_length=3430;expected_accuracy=0.996 | 1  | 1737 | 1737 | 3176 | 133 | 186<br>5 | 1995 | 343<br>0 |

|                                                                                                                                                |                                                                                                                                                                         |     |      |      |      |      |      |      |      |
|------------------------------------------------------------------------------------------------------------------------------------------------|-------------------------------------------------------------------------------------------------------------------------------------------------------------------------|-----|------|------|------|------|------|------|------|
| cb8564_c39136/f1p0/3036<br>isoform=cb8564_c39136;full_length_coverage=1;non_full_length_coverage=0;isoform_length=3036;expected_accuracy=0.998 | gnl BL_ORD_ID 14471      cb8564_c34518/f1p0/3136<br>isoform=cb8564_c34518;full_length_coverage=1;non_full_length_coverage=0;isoform_length=3136;expected_accuracy=0.991 | 1   | 2089 | 2085 | 3036 | 1    | 2067 | 2193 | 3136 |
| cb1505_c40/f1p0/2008                                                                                                                           | gnl BL_ORD_ID 29921      cb1505_c16/f1p0/2115<br>isoform=cb1505_c16;full_length_coverage=1;non_full_length_coverage=0;isoform_length=2115;expected_accuracy=0.997       | 809 | 1800 | 9    | 808  | 1101 | 2093 | 6    | 806  |
| cb8564_c112431/f1p0/2101                                                                                                                       | gnl BL_ORD_ID 58076      cb8564_c88170/f1p1/2083                                                                                                                        | 163 | 1864 | 1    | 165  | 333  | 2034 | 8    | 172  |
| cb8564_c38462/f1p0/3241                                                                                                                        | gnl BL_ORD_ID 55920      cb8564_c48949/f1p0/4357                                                                                                                        | 1   | 2280 | 2281 | 2946 | 2    | 2293 | 2847 | 3506 |
| cb6719_c46/f1p0/2507                                                                                                                           | gnl BL_ORD_ID 5888      cb6719_c12/f3p0/3100<br>isoform=cb6719_c12;full_length_coverage=3;non_full_length_coverage=0;isoform_length=3100;expected_accuracy=1.000        | 998 | 2452 | 88   | 1002 | 1636 | 3089 | 1    | 917  |
| cb10317_c4/f1p0/1797                                                                                                                           | gnl BL_ORD_ID 48379      cb10317_c2/f1p0/3207                                                                                                                           | 1   | 1216 | 1215 | 1806 | 1    | 1215 | 2373 | 2964 |
| cb8617_c0/f6p0/2265<br>isoform=cb8617_c0;full_length_coverage=6;non_full_length_coverage=0;isoform_length=2265;expected_accuracy=1.000         | gnl BL_ORD_ID 17936      cb8617_c2/f1p0/2817<br>isoform=cb8617_c2;full_length_coverage=1;non_full_length_coverage=0;isoform_length=2817;expected_accuracy=0.991         | 1   | 1504 | 1503 | 2241 | 1    | 1503 | 2084 | 2817 |
| cb3678_c12/f1p0/2637<br>isoform=cb3678_c12;full_length_coverage=1;non_full_length_coverage=0;isoform_length=2637;expected_accuracy=0.997       | gnl BL_ORD_ID 41571      cb3678_c5/f1p0/3157<br>isoform=cb3678_c5;full_length_coverage=1;non_full_length_coverage=0;isoform_length=3157;expected_accuracy=0.994         | 1   | 2331 | 2326 | 2637 | 26   | 2364 | 2847 | 3157 |

|                                                                                                                                                               |                                                                                                                                                                                   |     |      |      |      |     |          |      |          |
|---------------------------------------------------------------------------------------------------------------------------------------------------------------|-----------------------------------------------------------------------------------------------------------------------------------------------------------------------------------|-----|------|------|------|-----|----------|------|----------|
| cb8564_c185920/f1p0/2777<br>isoform=cb8564_c185920;full_length_coverage=1;non_full_length_coverage=0;isoform_length=2777;expected_accuracy=0.996              | gnl BL_ORD_ID 55327 cb8564_c38462/f1p0/3241                                                                                                                                       | 174 | 2775 | 1    | 177  | 345 | 294<br>6 | 14   | 186      |
| cb293_c6/f1p0/3758<br>isoform=cb293_c6;full_length_coverage=1;non_full_length_coverage=0;isoform_length=3758;expected_accuracy=0.997                          | gnl BL_ORD_ID 37295                      cb293_c1/f1p0/4190<br>isoform=cb293_c1;full_length_coverage=1;non_full_length_coverage=0;isoform_length=4190;expected_accuracy=0.999     | 11  | 1906 | 1903 | 3657 | 1   | 189<br>9 | 2444 | 419<br>0 |
| cb2246_c6/f1p0/3623<br>cb9157_c9/f1p0/1707<br>isoform=cb9157_c9;full_length_coverage=1;non_full_length_coverage=0;isoform_length=1707;expected_accuracy=0.996 | gnl BL_ORD_ID 68375 cb2246_c15/f1p0/3748<br><br>gnl BL_ORD_ID 58595 cb9157_c4/f1p0/2256                                                                                           | 23  | 3187 | 3188 | 3630 | 1   | 316<br>5 | 3291 | 373<br>2 |
| cb8564_c119767/f1p0/1892                                                                                                                                      | gnl BL_ORD_ID 11659              cb8564_c147719/f1p1/2554<br>isoform=cb8564_c147719;full_length_coverage=1;non_full_length_coverage=1;isoform_length=2554;expected_accuracy=0.996 | 186 | 1882 | 9    | 189  | 818 | 251<br>4 | 1    | 186      |
| cb4350_c8/f1p4/1998<br>isoform=cb4350_c8;full_length_coverage=1;non_full_length_coverage=4;isoform_length=1998;expected_accuracy=0.999                        | gnl BL_ORD_ID 72492 cb4350_c14/f1p1/2136                                                                                                                                          | 273 | 1958 | 5    | 268  | 447 | 213<br>3 | 2    | 263      |
| cb8564_c71904/f1p1/2820<br>isoform=cb8564_c71904;full_length_coverage=1;non_full_length_coverage=1;isoform_length=2820;expected_accuracy=0.996                | gnl BL_ORD_ID 57330 cb8564_c90173/f1p0/3220                                                                                                                                       | 1   | 1983 | 1978 | 2820 | 186 | 216<br>2 | 2351 | 319<br>3 |

|                                                                                                                                                  |                                                                                                                                                                    |      |      |      |      |      |      |      |      |
|--------------------------------------------------------------------------------------------------------------------------------------------------|--------------------------------------------------------------------------------------------------------------------------------------------------------------------|------|------|------|------|------|------|------|------|
| cb1935_c14/f1p0/3028                                                                                                                             | gnl BL_ORD_ID 66507 cb1935_c18/f1p0/3361                                                                                                                           | 15   | 1968 | 1963 | 3017 | 37   | 1989 | 2112 | 3166 |
| cb8564_c10064/f5p11/3897<br>isoform=cb8564_c10064;full_length_coverage=5;non_full_length_coverage=11;isoform_length=3897;expected_accuracy=0.996 | gnl BL_ORD_ID 54049 cb8564_c17373/f1p2/4790                                                                                                                        | 159  | 3134 | 3135 | 3897 | 583  | 3558 | 3968 | 4730 |
| cb8687_c3/f1p0/2296<br>isoform=cb8687_c3;full_length_coverage=1;non_full_length_coverage=0;isoform_length=2296;expected_accuracy=0.994           | gnl BL_ORD_ID 18632 cb8687_c4/f1p0/3035<br>isoform=cb8687_c4;full_length_coverage=1;non_full_length_coverage=0;isoform_length=3035;expected_accuracy=0.990         | 211  | 2238 | 1    | 211  | 965  | 3035 | 412  | 626  |
| cb8564_c47701/f1p0/3144                                                                                                                          | gnl BL_ORD_ID 14531 cb8564_c41778/f1p9/3482<br>isoform=cb8564_c41778;full_length_coverage=1;non_full_length_coverage=9;isoform_length=3482;expected_accuracy=0.992 | 253  | 2880 | 24   | 257  | 812  | 3439 | 11   | 247  |
| cb6169_c4/f1p0/1708<br>isoform=cb6169_c4;full_length_coverage=1;non_full_length_coverage=0;isoform_length=1708;expected_accuracy=0.994           | gnl BL_ORD_ID 74998 cb6169_c2/f1p0/2943                                                                                                                            | 1    | 1352 | 1350 | 1708 | 5    | 1356 | 2453 | 2811 |
| cb3290_c38/f1p0/2345<br>isoform=cb3290_c38;full_length_coverage=1;non_full_length_coverage=0;isoform_length=2345;expected_accuracy=0.996         | gnl BL_ORD_ID 71039 cb3290_c87/f1p11/2956                                                                                                                          | 1150 | 2345 | 1    | 1151 | 1586 | 2789 | 273  | 1429 |
| cb8564_c78701/f2p2/2927<br>isoform=cb8564_c78701;full_length_coverage=2;non_full_length_coverage=2;isoform_length=2927;expected_accuracy=1.000   | gnl BL_ORD_ID 17990 cb8564_c81281/f1p1/3440<br>isoform=cb8564_c81281;full_length_coverage=1;non_full_length_coverage=1;isoform_length=3440;expected_accuracy=1.000 | 1    | 2732 | 2728 | 2927 | 104  | 2810 | 3194 | 3391 |

|                                                                                                                                          |                                                                                                                                                            |     |      |      |      |      |          |      |          |
|------------------------------------------------------------------------------------------------------------------------------------------|------------------------------------------------------------------------------------------------------------------------------------------------------------|-----|------|------|------|------|----------|------|----------|
| cb1494_c20/f1p0/3547<br>isoform=cb1494_c20;full_length_coverage=1;non_full_length_coverage=0;isoform_length=3547;expected_accuracy=0.996 | gnl BL_ORD_ID 61366 cb1494_c21/f1p0/5091                                                                                                                   | 1   | 2179 | 2179 | 3547 | 111  | 229<br>3 | 3746 | 5114     |
| cb6054_c29/f1p0/1952<br>isoform=cb6054_c29;full_length_coverage=1;non_full_length_coverage=0;isoform_length=1952;expected_accuracy=0.991 | gnl BL_ORD_ID 74835 cb6054_c23/f1p2/2316                                                                                                                   | 1   | 1642 | 1638 | 1952 | 25   | 166<br>7 | 1796 | 2112     |
| cb4559_c7/f1p0/1283                                                                                                                      | gnl BL_ORD_ID 43630 cb4559_c3/f1p0/3310<br>isoform=cb4559_c3;full_length_coverage=1;non_full_length_coverage=0;isoform_length=3310;expected_accuracy=0.992 | 515 | 1286 | 60   | 517  | 2373 | 314<br>5 | 1    | 458      |
| cb452_c69/f1p2/3866<br>isoform=cb452_c69;full_length_coverage=1;non_full_length_coverage=2;isoform_length=3866;expected_accuracy=0.998   | gnl BL_ORD_ID 70911 cb452_c24/f1p0/4042                                                                                                                    | 1   | 2266 | 2266 | 3821 | 95   | 236<br>3 | 2502 | 405<br>9 |
| cb2733_c3/f2p0/1351<br>isoform=cb2733_c3;full_length_coverage=2;non_full_length_coverage=0;isoform_length=1351;expected_accuracy=1.000   | gnl BL_ORD_ID 37265 cb2733_c5/f2p1/1786<br>isoform=cb2733_c5;full_length_coverage=2;non_full_length_coverage=1;isoform_length=1786;expected_accuracy=0.995 | 143 | 1350 | 50   | 142  | 578  | 178<br>5 | 90   | 190      |
| cb513_c0/f3p0/2985<br>isoform=cb513_c0;full_length_coverage=3;non_full_length_coverage=0;isoform_length=2985;expected_accuracy=0.995     | gnl BL_ORD_ID 43725 cb513_c4/f1p0/3166<br>isoform=cb513_c4;full_length_coverage=1;non_full_length_coverage=0;isoform_length=3166;expected_accuracy=0.995   | 1   | 2125 | 2124 | 2985 | 24   | 214<br>9 | 2304 | 316<br>5 |
| cb8478_c37/f1p0/3192                                                                                                                     | gnl BL_ORD_ID 10548 cb8478_c9/f2p1/3524<br>isoform=cb8478_c9;full_length_coverage=2;non_full_length_coverage=0;isoform_length=3524;expected_accuracy=0.995 | 12  | 2659 | 2657 | 3149 | 1    | 264<br>8 | 3005 | 349<br>7 |



|                                                                                                                                                |                                                                                                                                                                         |     |      |      |      |     |      |      |      |
|------------------------------------------------------------------------------------------------------------------------------------------------|-------------------------------------------------------------------------------------------------------------------------------------------------------------------------|-----|------|------|------|-----|------|------|------|
| cb1340_c4/f1p0/1977<br>isoform=cb1340_c4;full_length_coverage=1;non_full_length_coverage=0;isoform_length=1977;expected_accuracy=0.996         | gnl BL_ORD_ID 25836      cb1340_c2/f1p0/3014<br>isoform=cb1340_c2;full_length_coverage=1;non_full_length_coverage=0;isoform_length=3014;expected_accuracy=0.993         | 1   | 1466 | 1462 | 1959 | 46  | 1507 | 2517 | 3014 |
| cb18456_c4171/f1p0/1189<br>isoform=cb18456_c4171;full_length_coverage=1;non_full_length_coverage=0;isoform_length=1189;expected_accuracy=0.993 | gnl BL_ORD_ID 67493      cb18456_c4264/f1p1/1767<br>isoform=cb18456_c4264;full_length_coverage=1;non_full_length_coverage=0;isoform_length=1767;expected_accuracy=0.993 | 258 | 1189 | 4    | 263  | 803 | 1761 | 1    | 247  |
| cb8564_c40218/f1p0/3146<br>isoform=cb8564_c40218;full_length_coverage=1;non_full_length_coverage=0;isoform_length=3146;expected_accuracy=0.993 | gnl BL_ORD_ID 56041      cb8564_c53077/f1p2/3406<br>isoform=cb8564_c53077;full_length_coverage=1;non_full_length_coverage=0;isoform_length=3406;expected_accuracy=0.993 | 337 | 3146 | 4    | 337  | 452 | 3285 | 1    | 337  |
| cb3835_c38/f1p0/2346<br>isoform=cb3835_c38;full_length_coverage=1;non_full_length_coverage=0;isoform_length=2346;expected_accuracy=0.994       | gnl BL_ORD_ID 41583      cb3835_c24/f1p1/2989<br>isoform=cb3835_c24;full_length_coverage=1;non_full_length_coverage=0;isoform_length=2989;expected_accuracy=0.994       | 326 | 2254 | 70   | 328  | 942 | 2871 | 1    | 259  |
| cb1468_c4/f1p2/2897<br>isoform=cb1468_c4;full_length_coverage=1;non_full_length_coverage=2;isoform_length=2897;expected_accuracy=0.997         | gnl BL_ORD_ID 63645      cb1468_c3/f1p0/4312<br>isoform=cb1468_c3;full_length_coverage=1;non_full_length_coverage=0;isoform_length=4312;expected_accuracy=0.997         | 2   | 2012 | 2011 | 2823 | 131 | 2140 | 3043 | 3855 |
| cb13565_c28/f1p4/1411<br>isoform=cb13565_c28;full_length_coverage=1;non_full_length_coverage=4;isoform_length=1411;expected_accuracy=0.998     | gnl BL_ORD_ID 62569      cb13565_c31/f1p9/1644<br>isoform=cb13565_c31;full_length_coverage=1;non_full_length_coverage=9;isoform_length=1644;expected_accuracy=0.998     | 143 | 1411 | 4    | 147  | 338 | 1606 | 10   | 153  |

|                                                                                                                                                  |                                                                                                                                                                      |     |      |      |      |      |      |      |      |
|--------------------------------------------------------------------------------------------------------------------------------------------------|----------------------------------------------------------------------------------------------------------------------------------------------------------------------|-----|------|------|------|------|------|------|------|
| cb8564_c178999/f1p0/2222<br>isoform=cb8564_c178999;full_length_coverage=1;non_full_length_coverage=0;isoform_length=2222;expected_accuracy=0.994 | gnl BL_ORD_ID 55894 cb8564_c48160/f1p2/3308                                                                                                                          | 10  | 1778 | 1773 | 2221 | 4    | 1787 | 2745 | 3195 |
| cb8167_c9/f1p0/2008<br>isoform=cb8167_c9;full_length_coverage=1;non_full_length_coverage=0;isoform_length=2008;expected_accuracy=0.996           | gnl BL_ORD_ID 7083 cb8167_c6/f1p1/2277<br>isoform=cb8167_c6;full_length_coverage=1;non_full_length_coverage=1;isoform_length=2277;expected_accuracy=0.991            | 132 | 2008 | 12   | 130  | 255  | 2119 | 1    | 116  |
| cb14637_c1/f1p0/1701                                                                                                                             | gnl BL_ORD_ID 56533 cb8564_c4774/f1p1/3231                                                                                                                           | 331 | 1680 | 6    | 331  | 1667 | 3016 | 1    | 326  |
| cb8564_c38233/f1p0/2780                                                                                                                          | gnl BL_ORD_ID 55931 cb8564_c49346/f1p3/3240                                                                                                                          | 1   | 1857 | 1856 | 2785 | 218  | 2074 | 2199 | 3127 |
| cb8564_c44063/f1p0/2503<br>isoform=cb8564_c44063;full_length_coverage=1;non_full_length_coverage=0;isoform_length=2503;expected_accuracy=0.999   | gnl BL_ORD_ID 16528 cb8564_c54660/f1p21/2689<br>isoform=cb8564_c54660;full_length_coverage=1;non_full_length_coverage=21;isoform_length=2689;expected_accuracy=0.999 | 397 | 2503 | 49   | 402  | 580  | 2686 | 80   | 435  |
| cb1317_c3/f5p1/2427<br>isoform=cb1317_c3;full_length_coverage=5;non_full_length_coverage=1;isoform_length=2427;expected_accuracy=1.000           | gnl BL_ORD_ID 61229 cb1317_c8/f1p0/4195                                                                                                                              | 182 | 2406 | 16   | 180  | 2167 | 4389 | 74   | 232  |
| cb8564_c45300/f1p4/3014<br>isoform=cb8564_c45300;full_length_coverage=1;non_full_length_coverage=4;isoform_length=3014;expected_accuracy=0.996   | gnl BL_ORD_ID 14091 cb8564_c43119/f1p4/3194<br>isoform=cb8564_c43119;full_length_coverage=1;non_full_length_coverage=4;isoform_length=3194;expected_accuracy=0.995   | 243 | 2976 | 1    | 246  | 401  | 3157 | 1    | 244  |
| cb15493_c0/f17p0/1006<br>isoform=cb15493_c0;full_length_coverage=17;non_full                                                                     | gnl BL_ORD_ID 15750 cb8564_c69252/f2p1/3018<br>isoform=cb8564_c69252;full_length_coverage=2;non_full                                                                 | 307 | 1006 | 4    | 309  | 2319 | 3018 | 1    | 306  |

|                                                                |                                                                                                                                                                         |     |      |      |      |     |          |      |          |  |
|----------------------------------------------------------------|-------------------------------------------------------------------------------------------------------------------------------------------------------------------------|-----|------|------|------|-----|----------|------|----------|--|
| _length_coverage=0;isoform_length=1006;expected_accuracy=1.000 | ll_length_coverage=1;isoform_length=3018;expected_accuracy=0.998                                                                                                        |     |      |      |      |     |          |      |          |  |
| cb8564_c83720/f1p0/2268                                        | gnl BL_ORD_ID 9154      cb8564_c11164/f1p0/3234<br>isoform=cb8564_c11164;full_length_coverage=1;non_full_length_coverage=0;isoform_length=3234;expected_accuracy=0.997  | 1   | 1503 | 1504 | 2262 | 4   | 150<br>1 | 2474 | 323<br>4 |  |
| cb8564_c105574/f4p1/2274                                       | gnl BL_ORD_ID 13351      cb8564_c2055/f1p1/2415<br>isoform=cb8564_c105574;full_length_coverage=4;non_full_length_coverage=1;isoform_length=2274;expected_accuracy=0.995 | 110 | 1522 | 1521 | 2274 | 1   | 141<br>0 | 1615 | 237<br>1 |  |
| cb2842_c11/f1p0/2421                                           | gnl BL_ORD_ID 37105      cb2842_c29/f18p1/2546<br>isoform=cb2842_c11;full_length_coverage=1;non_full_length_coverage=0;isoform_length=2421;expected_accuracy=0.994      | 147 | 2417 | 1    | 146  | 269 | 254<br>6 | 1    | 146      |  |
| cb5806_c4/f1p2/2764                                            | gnl BL_ORD_ID 74450      cb5806_c2/f1p0/2888<br>isoform=cb5806_c4;full_length_coverage=1;non_full_length_coverage=2;isoform_length=2764;expected_accuracy=0.991         | 106 | 2069 | 2068 | 2764 | 1   | 196<br>8 | 2133 | 283<br>0 |  |
| cb5755_c4/f1p0/2811                                            | gnl BL_ORD_ID 45433      cb5755_c3/f1p0/2933<br>isoform=cb5755_c3;full_length_coverage=1;non_full_length_coverage=0;isoform_length=2933;expected_accuracy=0.993         | 1   | 1504 | 1502 | 2803 | 1   | 149<br>6 | 1632 | 293<br>3 |  |
| cb18782_c0/f1p2/5630                                           | gnl BL_ORD_ID 35902      cb18782_c3/f1p2/5766<br>isoform=cb18782_c0;full_length_coverage=1;non_full_length_coverage=2;isoform_length=5630;expected_accuracy=0.997       | 3   | 4306 | 4304 | 5594 | 1   | 432<br>1 | 4455 | 576<br>6 |  |

|                                                                                                                                                |                                                                                                                                                                      |      |      |      |      |      |      |      |      |
|------------------------------------------------------------------------------------------------------------------------------------------------|----------------------------------------------------------------------------------------------------------------------------------------------------------------------|------|------|------|------|------|------|------|------|
| cb8564_c35301/f1p0/2777                                                                                                                        | gnl BL_ORD_ID 55844 cb8564_c44552/f1p0/3216                                                                                                                          | 125  | 1768 | 1764 | 2718 | 269  | 1930 | 2068 | 3021 |
| cb3143_c8/f1p1/2928<br>isoform=cb3143_c8;full_length_coverage=1;non_full_length_coverage=1;isoform_length=2928;expected_accuracy=0.992         | gnl BL_ORD_ID 37665 cb3143_c33/f10p3/3441<br>isoform=cb3143_c33;full_length_coverage=10;non_full_length_coverage=3;isoform_length=3441;expected_accuracy=1.000       | 205  | 2927 | 1    | 206  | 722  | 3441 | 72   | 277  |
| cb8564_c36731/f1p2/2761                                                                                                                        | gnl BL_ORD_ID 12913 cb8564_c182049/f1p0/3195<br>isoform=cb8564_c182049;full_length_coverage=1;non_full_length_coverage=0;isoform_length=3195;expected_accuracy=0.997 | 1    | 1977 | 1972 | 2738 | 1    | 1993 | 2424 | 3195 |
| cb8564_c24784/f1p1/2695                                                                                                                        | gnl BL_ORD_ID 56381 cb8564_c75626/f1p2/3199                                                                                                                          | 2    | 2114 | 2112 | 2599 | 2    | 2116 | 2611 | 3099 |
| cb2854_c44/f1p0/3207<br>isoform=cb2854_c44;full_length_coverage=1;non_full_length_coverage=0;isoform_length=3207;expected_accuracy=0.995       | gnl BL_ORD_ID 36848 cb2854_c42/f1p0/3914<br>isoform=cb2854_c42;full_length_coverage=1;non_full_length_coverage=0;isoform_length=3914;expected_accuracy=0.999         | 1    | 2886 | 2883 | 3207 | 4    | 2890 | 3590 | 3913 |
| cb8564_c75620/f1p0/2781<br>isoform=cb8564_c75620;full_length_coverage=1;non_full_length_coverage=0;isoform_length=2781;expected_accuracy=0.996 | gnl BL_ORD_ID 11006 cb8564_c107982/f2p0/2940<br>isoform=cb8564_c107982;full_length_coverage=2;non_full_length_coverage=0;isoform_length=2940;expected_accuracy=0.998 | 1    | 1769 | 1764 | 2781 | 1    | 1767 | 1878 | 2895 |
| cb5960_c15/f1p0/2801                                                                                                                           | gnl BL_ORD_ID 74707 cb5960_c9/f1p0/3444                                                                                                                              | 2    | 2020 | 2018 | 2642 | 42   | 2061 | 2806 | 3430 |
| cb8564_c69336/f3p0/3731<br>isoform=cb8564_c69336;full_length_coverage=3;non_full_length_coverage=0;isoform_length=3731;expected_accuracy=0.997 | gnl BL_ORD_ID 57158 cb8564_c85001/f1p0/3853                                                                                                                          | 1575 | 3728 | 1    | 1574 | 1710 | 3881 | 1    | 1574 |

|                                                                                                                                        |                                                                                                                                                                         |     |      |      |      |      |      |      |      |
|----------------------------------------------------------------------------------------------------------------------------------------|-------------------------------------------------------------------------------------------------------------------------------------------------------------------------|-----|------|------|------|------|------|------|------|
| cb9549_c8/f1p0/1542<br>isoform=cb9549_c8;full_length_coverage=1;non_full_length_coverage=0;isoform_length=1542;expected_accuracy=1.000 | gnl BL_ORD_ID 21591      cb9549_c7/f1p0/1719<br>isoform=cb9549_c7;full_length_coverage=1;non_full_length_coverage=0;isoform_length=1719;expected_accuracy=0.993         | 114 | 1542 | 1    | 113  | 279  | 1710 | 25   | 136  |
| cb8564_c81040/f1p1/2371                                                                                                                | gnl BL_ORD_ID 53111      cb8564_c116552/f1p1/2737                                                                                                                       | 10  | 1965 | 1962 | 2478 | 1    | 1956 | 2161 | 2678 |
| cb18456_c6959/f1p0/1857                                                                                                                | gnl BL_ORD_ID 16450      cb8564_c72442/f2p1/2290<br>isoform=cb8564_c72442;full_length_coverage=2;non_full_length_coverage=1;isoform_length=2290;expected_accuracy=0.994 | 653 | 1782 | 74   | 654  | 1158 | 2288 | 1    | 583  |
| cb8564_c46939/f1p1/2926                                                                                                                | gnl BL_ORD_ID 56929      cb8564_c77329/f1p0/3886                                                                                                                        | 17  | 2134 | 2130 | 2870 | 32   | 2154 | 2259 | 3000 |
| cb8564_c11853/f1p0/2732                                                                                                                | gnl BL_ORD_ID 17752      cb8564_c80488/f1p0/2745<br>isoform=cb8564_c80488;full_length_coverage=1;non_full_length_coverage=0;isoform_length=2745;expected_accuracy=0.993 | 11  | 2072 | 2071 | 2585 | 11   | 2083 | 2208 | 2732 |
| cb14724_c4/f1p0/1676                                                                                                                   | gnl BL_ORD_ID 40725      cb3622_c2/f3p1/2136<br>isoform=cb3622_c2;full_length_coverage=3;non_full_length_coverage=1;isoform_length=2136;expected_accuracy=1.000         | 1   | 1332 | 1330 | 1668 | 25   | 1356 | 1765 | 2104 |
| cb8564_c23232/f1p3/2540                                                                                                                | gnl BL_ORD_ID 55553      cb8564_c45006/f1p1/2724                                                                                                                        | 16  | 2172 | 2173 | 2518 | 4    | 2157 | 2265 | 2610 |
| cb373_c8/f1p0/3698<br>isoform=cb373_c8;full_length_coverage=1;non_full_length_coverage=0;isoform_length=3698;expected_accuracy=0.997   | gnl BL_ORD_ID 40699      cb373_c6/f1p0/4615<br>isoform=cb373_c6;full_length_coverage=1;non_full_length_coverage=0;isoform_length=4615;expected_accuracy=0.997           | 232 | 3698 | 1    | 232  | 1118 | 4586 | 56   | 286  |

|                                                                                                                                                  |                                                                                                                                                                           |     |      |      |      |     |          |      |          |
|--------------------------------------------------------------------------------------------------------------------------------------------------|---------------------------------------------------------------------------------------------------------------------------------------------------------------------------|-----|------|------|------|-----|----------|------|----------|
| cb4674_c44/f1p2/2925<br>isoform=cb4674_c44;full_length_coverage=1;non_full_length_coverage=2;isoform_length=2925;expected_accuracy=0.991         | gnl BL_ORD_ID 43463      cb4674_c77/f1p2/3189<br>isoform=cb4674_c77;full_length_coverage=1;non_full_length_coverage=2;isoform_length=3189;expected_accuracy=0.999         | 1   | 2243 | 2242 | 2901 | 164 | 239<br>2 | 2533 | 318<br>9 |
| cb5668_c6/f1p0/2697                                                                                                                              | gnl BL_ORD_ID 74261      cb5668_c2/f1p0/3152                                                                                                                              | 1   | 1663 | 1660 | 2711 | 59  | 175<br>9 | 2020 | 307<br>2 |
| cb8564_c45596/f1p1/3430                                                                                                                          | gnl BL_ORD_ID 12503      cb8564_c130989/f3p0/3592<br>isoform=cb8564_c130989;full_length_coverage=3;non_full_length_coverage=0;isoform_length=3592;expected_accuracy=0.997 | 2   | 2780 | 2775 | 3378 | 90  | 287<br>0 | 2989 | 359<br>2 |
| cb5460_c22/f1p1/2849                                                                                                                             | gnl BL_ORD_ID 73948      cb5460_c9/f1p1/2896                                                                                                                              | 1   | 2085 | 2081 | 2777 | 11  | 209<br>5 | 2217 | 290<br>6 |
| cb8564_c176603/f2p2/3262<br>isoform=cb8564_c176603;full_length_coverage=2;non_full_length_coverage=2;isoform_length=3262;expected_accuracy=0.997 | gnl BL_ORD_ID 18565      cb8564_c92252/f1p1/3402<br>isoform=cb8564_c92252;full_length_coverage=1;non_full_length_coverage=1;isoform_length=3402;expected_accuracy=0.997   | 146 | 3211 | 1    | 146  | 335 | 340<br>2 | 6    | 151      |
| cb8564_c161792/f1p1/2087                                                                                                                         | gnl BL_ORD_ID 53698      cb8564_c1307/f1p0/2847                                                                                                                           | 17  | 1703 | 1700 | 2044 | 104 | 179<br>0 | 2349 | 269<br>3 |
| cb8617_c3/f1p0/2761                                                                                                                              | gnl BL_ORD_ID 17936      cb8617_c2/f1p0/2817<br>isoform=cb8617_c2;full_length_coverage=1;non_full_length_coverage=0;isoform_length=2817;expected_accuracy=0.991           | 1   | 1938 | 1933 | 2675 | 3   | 193<br>2 | 2080 | 281<br>7 |
| cb4997_c18/f1p0/2327                                                                                                                             | gnl BL_ORD_ID 42221      cb4997_c15/f1p0/2104<br>isoform=cb4997_c15;full_length_coverage=1;non_full_length_coverage=0;isoform_length=2104;expected_accuracy=0.994         | 1   | 1545 | 1543 | 1997 | 1   | 154<br>7 | 1647 | 210<br>3 |

|                                                                                                                                                |                                                                                                                                                                        |      |      |      |      |      |          |      |          |
|------------------------------------------------------------------------------------------------------------------------------------------------|------------------------------------------------------------------------------------------------------------------------------------------------------------------------|------|------|------|------|------|----------|------|----------|
| cb8564_c42814/f1p0/2151<br>isoform=cb8564_c42814;full_length_coverage=1;non_full_length_coverage=0;isoform_length=2151;expected_accuracy=0.993 | gnl BL_ORD_ID 56833 cb8564_c73203/f1p0/2850                                                                                                                            | 650  | 2149 | 7    | 652  | 1172 | 267<br>3 | 1    | 646      |
| cb8564_c116328/f1p6/2732                                                                                                                       | gnl BL_ORD_ID 9350      cb8564_c11826/f1p0/2916<br>isoform=cb8564_c11826;full_length_coverage=1;non_full_length_coverage=0;isoform_length=2916;expected_accuracy=0.997 | 1293 | 2617 | 1    | 1294 | 1543 | 286<br>7 | 5    | 129<br>6 |
| cb427_c2/f9p1/1897<br>isoform=cb427_c2;full_length_coverage=9;non_full_length_coverage=1;isoform_length=1897;expected_accuracy=1.000           | gnl BL_ORD_ID 43366      cb427_c9/f1p0/4077<br>isoform=cb427_c9;full_length_coverage=1;non_full_length_coverage=0;isoform_length=4077;expected_accuracy=0.991          | 1    | 1586 | 1582 | 1897 | 2    | 158<br>6 | 2370 | 268<br>6 |
| cb435_c1/f1p0/4816<br>isoform=cb435_c1;full_length_coverage=1;non_full_length_coverage=0;isoform_length=4816;expected_accuracy=0.999           | gnl BL_ORD_ID 72170 cb435_c7/f1p0/5320                                                                                                                                 | 12   | 4374 | 4372 | 4747 | 6    | 436<br>8 | 4933 | 531<br>3 |
| cb6507_c5/f1p0/2184                                                                                                                            | gnl BL_ORD_ID 3952      cb6507_c4/f1p0/2292<br>isoform=cb6507_c4;full_length_coverage=1;non_full_length_coverage=0;isoform_length=2292;expected_accuracy=0.995         | 1    | 1222 | 1221 | 2175 | 10   | 122<br>9 | 1338 | 229<br>2 |
| cb7164_c0/f1p0/2692<br>isoform=cb7164_c0;full_length_coverage=1;non_full_length_coverage=0;isoform_length=2692;expected_accuracy=0.992         | gnl BL_ORD_ID 47866 cb7164_c1/f1p0/4448                                                                                                                                | 103  | 2440 | 2437 | 2659 | 4    | 234<br>9 | 4041 | 426<br>2 |
| cb8564_c183213/f1p3/3190<br>isoform=cb8564_c183213;full_length_coverage=1;non_                                                                 | gnl BL_ORD_ID 10365      cb8564_c107731/f4p7/3727<br>isoform=cb8564_c107731;full_length_coverage=4;non_f                                                               | 1    | 2313 | 2318 | 3190 | 106  | 241<br>8 | 2745 | 361<br>7 |

|                                                                                                                                                  |                                                                                                                                                                     |     |      |      |      |      |      |      |      |  |
|--------------------------------------------------------------------------------------------------------------------------------------------------|---------------------------------------------------------------------------------------------------------------------------------------------------------------------|-----|------|------|------|------|------|------|------|--|
| full_length_coverage=3;isoform_length=3190;expected_accuracy=0.999                                                                               | ull_length_coverage=7;isoform_length=3727;expected_accuracy=0.998                                                                                                   |     |      |      |      |      |      |      |      |  |
| cb8564_c15653/f1p4/2475                                                                                                                          | gnl BL_ORD_ID 53923 cb8564_c15010/f1p10/2806                                                                                                                        | 1   | 2293 | 2289 | 2446 | 1    | 2293 | 2559 | 2716 |  |
| cb466_c13/f1p0/3021                                                                                                                              | gnl BL_ORD_ID 41724 cb466_c1/f1p1/3973<br>isoform=cb466_c1;full_length_coverage=1;non_full_length_coverage=1;isoform_length=3973;expected_accuracy=0.991            | 213 | 2955 | 16   | 215  | 1234 | 3972 | 13   | 209  |  |
| cb1656_c19/f1p1/3657<br>isoform=cb1656_c19;full_length_coverage=1;non_full_length_coverage=1;isoform_length=3657;expected_accuracy=1.000         | gnl BL_ORD_ID 63828 cb1656_c15/f1p1/3875                                                                                                                            | 1   | 2977 | 2976 | 3629 | 1    | 2978 | 3137 | 3788 |  |
| cb8564_c110954/f1p1/2392<br>isoform=cb8564_c110954;full_length_coverage=1;non_full_length_coverage=1;isoform_length=2392;expected_accuracy=0.994 | gnl BL_ORD_ID 9183 cb8564_c121433/f4p1/2731<br>isoform=cb8564_c121433;full_length_coverage=4;non_full_length_coverage=1;isoform_length=2731;expected_accuracy=1.000 | 1   | 2113 | 2109 | 2392 | 34   | 2156 | 2344 | 2628 |  |
| cb2284_c10/f1p2/2830<br>isoform=cb2284_c10;full_length_coverage=1;non_full_length_coverage=2;isoform_length=2830;expected_accuracy=0.997         | gnl BL_ORD_ID 36592 cb2284_c7/f1p0/3988<br>isoform=cb2284_c7;full_length_coverage=1;non_full_length_coverage=0;isoform_length=3988;expected_accuracy=0.996          | 268 | 2789 | 1    | 273  | 1467 | 3988 | 1    | 276  |  |
| cb8564_c48356/f1p0/3140                                                                                                                          | gnl BL_ORD_ID 54429 cb8564_c44507/f1p0/3862                                                                                                                         | 1   | 2435 | 2434 | 2957 | 53   | 2487 | 3025 | 3548 |  |
| cb5125_c34/f1p0/1890                                                                                                                             | gnl BL_ORD_ID 42295 cb5125_c41/f1p2/2137<br>isoform=cb5125_c41;full_length_coverage=11;non_full_length_coverage=2;isoform_length=2137;expected_accuracy=1.000       | 1   | 1145 | 1144 | 1780 | 66   | 1212 | 1404 | 2038 |  |



|                          |                                                                                                                                                                           |     |      |      |      |     |          |      |          |
|--------------------------|---------------------------------------------------------------------------------------------------------------------------------------------------------------------------|-----|------|------|------|-----|----------|------|----------|
| cb2274_c17/f1p0/2659     | gnl BL_ORD_ID 68398 cb2274_c16/f1p0/2808                                                                                                                                  | 270 | 2427 | 4    | 274  | 473 | 262<br>6 | 3    | 273      |
| cb8564_c23232/f1p3/2540  | gnl BL_ORD_ID 11483      cb8564_c12665/f1p15/2806<br>isoform=cb8564_c12665;full_length_coverage=1;non_full_length_coverage=15;isoform_length=2806;expected_accuracy=0.995 | 16  | 2172 | 2167 | 2518 | 7   | 216<br>8 | 2270 | 262<br>1 |
| cb8564_c181853/f1p0/2119 | gnl BL_ORD_ID 12938      cb8564_c181163/f1p1/2936<br>isoform=cb8564_c181853;full_length_coverage=1;non_full_length_coverage=0;isoform_length=2119;expected_accuracy=0.997 | 1   | 1339 | 1334 | 2119 | 5   | 133<br>9 | 2158 | 293<br>5 |
| cb1052_c19/f1p0/2851     | gnl BL_ORD_ID 1189              cb1052_c16/f1p0/2854<br>isoform=cb1052_c16;full_length_coverage=1;non_full_length_coverage=0;isoform_length=2854;expected_accuracy=0.995  | 605 | 2793 | 76   | 601  | 669 | 285<br>4 | 1    | 522      |
| cb8564_c48473/f1p2/2701  | gnl BL_ORD_ID 12821      cb8564_c156372/f1p3/2909<br>isoform=cb8564_c48473;full_length_coverage=1;non_full_length_coverage=2;isoform_length=2701;expected_accuracy=0.999  | 220 | 2701 | 2    | 225  | 427 | 290<br>9 | 60   | 283      |
| cb6980_c16/f1p0/2284     | gnl BL_ORD_ID 50225 cb6980_c9/f1p0/2797<br>isoform=cb6980_c16;full_length_coverage=1;non_full_length_coverage=0;isoform_length=2284;expected_accuracy=1.000               | 1   | 1987 | 1982 | 2284 | 67  | 205<br>7 | 2181 | 248<br>3 |
| cb8564_c38035/f1p0/2770  | gnl BL_ORD_ID 9418      cb8564_c119193/f1p2/2975<br>isoform=cb8564_c119193;full_length_coverage=1;non_full_length_coverage=2;isoform_length=2975;expected_accuracy=0.998  | 1   | 2035 | 2033 | 2755 | 1   | 205<br>5 | 2246 | 297<br>5 |

|                                                                                                                                                |                                                                                                                                                                           |      |      |      |      |      |      |      |      |
|------------------------------------------------------------------------------------------------------------------------------------------------|---------------------------------------------------------------------------------------------------------------------------------------------------------------------------|------|------|------|------|------|------|------|------|
| cb8564_c14344/f1p0/2533<br>isoform=cb8564_c14344;full_length_coverage=1;non_full_length_coverage=0;isoform_length=2533;expected_accuracy=0.993 | gnl BL_ORD_ID 54405 cb8564_c35890/f1p0/3157                                                                                                                               | 148  | 2507 | 1    | 151  | 476  | 2836 | 7    | 157  |
| cb8564_c39739/f1p1/2219<br>isoform=cb8564_c39739;full_length_coverage=1;non_full_length_coverage=1;isoform_length=2219;expected_accuracy=0.993 | gnl BL_ORD_ID 12829      cb8564_c161406/f2p1/2330<br>isoform=cb8564_c161406;full_length_coverage=2;non_full_length_coverage=1;isoform_length=2330;expected_accuracy=0.997 | 10   | 1839 | 1840 | 2153 | 9    | 1880 | 2007 | 2330 |
| cb626_c16/f1p0/3290                                                                                                                            | gnl BL_ORD_ID 47162 cb626_c15/f1p0/3353                                                                                                                                   | 1279 | 3049 | 1    | 1278 | 1459 | 3229 | 1    | 1278 |
| cb17446_c1/f1p0/1452<br>isoform=cb17446_c1;full_length_coverage=1;non_full_length_coverage=0;isoform_length=1452;expected_accuracy=0.991       | gnl BL_ORD_ID 33637      cb17446_c0/f1p0/1723<br>isoform=cb17446_c0;full_length_coverage=1;non_full_length_coverage=0;isoform_length=1723;expected_accuracy=0.990         | 1    | 1208 | 1206 | 1452 | 32   | 1239 | 1436 | 1681 |
| cb8564_c38653/f1p1/2281<br>isoform=cb8564_c38653;full_length_coverage=1;non_full_length_coverage=1;isoform_length=2281;expected_accuracy=0.991 | gnl BL_ORD_ID 14642      cb8564_c33936/f7p0/2581<br>isoform=cb8564_c33936;full_length_coverage=7;non_full_length_coverage=0;isoform_length=2581;expected_accuracy=0.998   | 1    | 1368 | 1368 | 2281 | 1    | 1354 | 1647 | 2564 |
| cb8564_c38035/f1p0/2770                                                                                                                        | gnl BL_ORD_ID 14529      cb8564_c44074/f1p1/2922<br>isoform=cb8564_c44074;full_length_coverage=1;non_full_length_coverage=1;isoform_length=2922;expected_accuracy=0.994   | 1    | 2030 | 2033 | 2756 | 1    | 2013 | 2205 | 2919 |
| cb9589_c0/f3p0/2041<br>isoform=cb9589_c0;full_length_coverage=3;non_full_length_coverage=0;isoform_length=2041;expected_accuracy=1.000         | gnl BL_ORD_ID 19864      cb9589_c3/f1p0/3277<br>isoform=cb9589_c3;full_length_coverage=1;non_full_length_coverage=0;isoform_length=3277;expected_accuracy=0.995           | 1    | 1224 | 1226 | 2041 | 32   | 1253 | 2466 | 3277 |

|                          |                                                                                                                                                                          |      |      |      |      |      |          |      |          |
|--------------------------|--------------------------------------------------------------------------------------------------------------------------------------------------------------------------|------|------|------|------|------|----------|------|----------|
| cb8564_c21515/f1p0/3130  | gnl BL_ORD_ID 13377      cb8564_c22091/f2p0/3351<br>isoform=cb8564_c22091;full_length_coverage=2;non_full_length_coverage=0;isoform_length=3351;expected_accuracy=0.997  | 1165 | 2712 | 1    | 1168 | 1805 | 335<br>1 | 515  | 168<br>2 |
| cb4942_c12/f1p1/1339     | gnl BL_ORD_ID 44010      cb4942_c5/f2p1/2283<br>isoform=cb4942_c5;full_length_coverage=2;non_full_length_coverage=1;isoform_length=2283;expected_accuracy=1.000          | 1    | 1243 | 1241 | 1341 | 5    | 124<br>4 | 2166 | 226<br>5 |
| cb4953_c5/f1p1/1763      | gnl BL_ORD_ID 43241      cb4953_c3/f1p0/3107<br>isoform=cb4953_c3;full_length_coverage=1;non_full_length_coverage=0;isoform_length=3107;expected_accuracy=0.997          | 1    | 1084 | 1083 | 1688 | 1    | 108<br>2 | 2495 | 310<br>1 |
| cb8564_c149594/f1p1/2449 | gnl BL_ORD_ID 12956      cb8564_c1771/f3p1/3767<br>isoform=cb8564_c1771;full_length_coverage=3;non_full_length_coverage=1;isoform_length=3767;expected_accuracy=0.996    | 1    | 1242 | 1240 | 2366 | 74   | 133<br>4 | 2646 | 376<br>7 |
| cb8564_c165050/f2p1/2091 | gnl BL_ORD_ID 52763      cb8564_c13243/f1p0/4432<br>isoform=cb8564_c165050;full_length_coverage=2;non_full_length_coverage=1;isoform_length=2091;expected_accuracy=0.997 | 271  | 2091 | 81   | 269  | 2443 | 426<br>1 | 2    | 191      |
| cb3362_c13/f3p2/3516     | gnl BL_ORD_ID 41033      cb3362_c17/f1p0/3642<br>isoform=cb3362_c13;full_length_coverage=3;non_full_length_coverage=2;isoform_length=3516;expected_accuracy=0.998        | 153  | 3479 | 1    | 153  | 320  | 364<br>2 | 1    | 155      |
| cb8564_c128717/f3p4/2465 | gnl BL_ORD_ID 57978      cb8564_c85833/f1p0/2942<br>isoform=cb8564_c128717;full_length_coverage=3;non_                                                                   | 1    | 1711 | 1709 | 2355 | 1    | 170<br>9 | 2309 | 295<br>5 |

|                                                                                                                                                                                                            |                                                                                                                                                                    |      |      |      |      |      |      |      |      |
|------------------------------------------------------------------------------------------------------------------------------------------------------------------------------------------------------------|--------------------------------------------------------------------------------------------------------------------------------------------------------------------|------|------|------|------|------|------|------|------|
| full_length_coverage=4;isoform_length=2465;expected_accuracy=0.994<br>cb307_c6/f1p1/4064<br>isoform=cb307_c6;full_length_coverage=1;non_full_length_coverage=1;isoform_length=4064;expected_accuracy=0.997 | gnl BL_ORD_ID 69545 cb307_c16/f1p1/4761                                                                                                                            | 11   | 2744 | 2744 | 4064 | 20   | 2757 | 3006 | 4325 |
| cb8564_c39136/f1p0/3036<br>isoform=cb8564_c39136;full_length_coverage=1;non_full_length_coverage=0;isoform_length=3036;expected_accuracy=0.998                                                             | gnl BL_ORD_ID 14838 cb8564_c34060/f2p0/3214<br>isoform=cb8564_c34060;full_length_coverage=2;non_full_length_coverage=0;isoform_length=3214;expected_accuracy=0.993 | 1    | 2089 | 2085 | 3034 | 6    | 2137 | 2264 | 3214 |
| cb6061_c3/f1p0/2514<br>isoform=cb6061_c3;full_length_coverage=1;non_full_length_coverage=0;isoform_length=2514;expected_accuracy=0.997                                                                     | gnl BL_ORD_ID 45128 cb6061_c2/f1p0/2948<br>isoform=cb6061_c2;full_length_coverage=1;non_full_length_coverage=0;isoform_length=2948;expected_accuracy=0.995         | 1056 | 2513 | 1    | 1056 | 1495 | 2948 | 18   | 1073 |
| cb416_c58/f1p0/2505<br>isoform=cb416_c58;full_length_coverage=1;non_full_length_coverage=0;isoform_length=2505;expected_accuracy=0.992                                                                     | gnl BL_ORD_ID 70897 cb416_c51/f1p0/2774                                                                                                                            | 286  | 2498 | 4    | 287  | 581  | 2774 | 150  | 430  |
| cb10297_c5/f1p0/1838                                                                                                                                                                                       | gnl BL_ORD_ID 48347 cb10297_c4/f1p0/2035                                                                                                                           | 1    | 1207 | 1207 | 1674 | 1    | 1207 | 1357 | 1824 |
| cb8564_c37361/f1p0/3076                                                                                                                                                                                    | gnl BL_ORD_ID 55182 cb8564_c34825/f1p2/3200                                                                                                                        | 10   | 2481 | 2477 | 3070 | 6    | 2505 | 2606 | 3196 |
| cb6633_c6/f2p1/2044<br>isoform=cb6633_c6;full_length_coverage=2;non_full_length_coverage=1;isoform_length=2044;expected_accuracy=0.996                                                                     | gnl BL_ORD_ID 3747 cb6633_c9/f1p0/2805<br>isoform=cb6633_c9;full_length_coverage=1;non_full_length_coverage=0;isoform_length=2805;expected_accuracy=0.997          | 1    | 1493 | 1490 | 2033 | 27   | 1518 | 2261 | 2805 |

|                                                                                                                                                  |                                                                                                                                                                           |     |      |      |      |     |      |      |      |
|--------------------------------------------------------------------------------------------------------------------------------------------------|---------------------------------------------------------------------------------------------------------------------------------------------------------------------------|-----|------|------|------|-----|------|------|------|
| cb7486_c6/f1p0/1952<br>isoform=cb7486_c6;full_length_coverage=1;non_full_length_coverage=0;isoform_length=1952;expected_accuracy=0.990           | gnl BL_ORD_ID 51282 cb7486_c7/f1p0/2565                                                                                                                                   | 397 | 1952 | 49   | 398  | 553 | 2110 | 91   | 442  |
| cb8564_c2273/f1p2/2502<br>isoform=cb8564_c2273;full_length_coverage=1;non_full_length_coverage=2;isoform_length=2502;expected_accuracy=0.995     | gnl BL_ORD_ID 13611      cb8564_c2184/f1p0/2606<br>isoform=cb8564_c2184;full_length_coverage=1;non_full_length_coverage=0;isoform_length=2606;expected_accuracy=0.995     | 280 | 2502 | 56   | 280  | 384 | 2606 | 49   | 272  |
| cb14792_c2/f1p0/1864<br>isoform=cb14792_c2;full_length_coverage=1;non_full_length_coverage=0;isoform_length=1864;expected_accuracy=0.995         | gnl BL_ORD_ID 58053 cb8564_c87612/f1p0/2171                                                                                                                               | 1   | 1524 | 1519 | 1864 | 10  | 1533 | 1744 | 2089 |
| cb1306_c36/f1p0/2164<br>isoform=cb1306_c36;full_length_coverage=1;non_full_length_coverage=0;isoform_length=2164;expected_accuracy=1.000         | gnl BL_ORD_ID 25571      cb1306_c0/f1p2/3283<br>isoform=cb1306_c0;full_length_coverage=1;non_full_length_coverage=2;isoform_length=3283;expected_accuracy=1.000           | 1   | 1793 | 1788 | 2164 | 190 | 1982 | 2907 | 3283 |
| cb2683_c4/f1p0/3274<br>isoform=cb2683_c4;full_length_coverage=1;non_full_length_coverage=0;isoform_length=3274;expected_accuracy=0.997           | gnl BL_ORD_ID 37537      cb2683_c3/f1p0/3843<br>isoform=cb2683_c3;full_length_coverage=1;non_full_length_coverage=0;isoform_length=3843;expected_accuracy=0.995           | 1   | 2581 | 2581 | 3274 | 17  | 2594 | 2812 | 3505 |
| cb8564_c138545/f4p0/2007<br>isoform=cb8564_c138545;full_length_coverage=4;non_full_length_coverage=0;isoform_length=2007;expected_accuracy=1.000 | gnl BL_ORD_ID 10389      cb8564_c110053/f2p0/2311<br>isoform=cb8564_c110053;full_length_coverage=2;non_full_length_coverage=0;isoform_length=2311;expected_accuracy=0.996 | 1   | 1027 | 1026 | 1925 | 1   | 1032 | 1413 | 2311 |
| cb8564_c45300/f1p4/3014<br>isoform=cb8564_c45300;full_length_coverage=1;non_f                                                                    | gnl BL_ORD_ID 55521 cb8564_c44014/f1p0/3720                                                                                                                               | 243 | 3014 | 24   | 246  | 416 | 3188 | 40   | 259  |

|                                                                   |                                                                                                                                                                         |      |      |      |      |      |          |      |          |  |
|-------------------------------------------------------------------|-------------------------------------------------------------------------------------------------------------------------------------------------------------------------|------|------|------|------|------|----------|------|----------|--|
| ull_length_coverage=4;isoform_length=3014;expected_accuracy=0.996 |                                                                                                                                                                         |      |      |      |      |      |          |      |          |  |
| cb8564_c151935/f1p1/2206                                          | gnl BL_ORD_ID 11244      cb8564_c13867/f3p0/4487<br>isoform=cb8564_c13867;full_length_coverage=3;non_full_length_coverage=0;isoform_length=4487;expected_accuracy=0.994 | 262  | 2208 | 5    | 263  | 2515 | 446<br>5 | 27   | 284      |  |
| cb8564_c36689/f1p1/2368                                           | gnl BL_ORD_ID 14726      cb8564_c34020/f2p0/2942<br>isoform=cb8564_c36689;full_length_coverage=1;non_full_length_coverage=1;isoform_length=2368;expected_accuracy=0.991 | 1    | 1709 | 1706 | 2368 | 1    | 173<br>7 | 2236 | 290<br>0 |  |
| cb1215_c8/f1p0/3148                                               | gnl BL_ORD_ID 24740      cb1215_c15/f1p0/3339<br>isoform=cb1215_c15;full_length_coverage=1;non_full_length_coverage=0;isoform_length=3339;expected_accuracy=0.997       | 1309 | 3073 | 1    | 1308 | 1576 | 333<br>9 | 20   | 132<br>6 |  |
| cb9785_c1/f1p0/1855                                               | gnl BL_ORD_ID 22177      cb9785_c0/f1p0/1978<br>isoform=cb9785_c0;full_length_coverage=1;non_full_length_coverage=0;isoform_length=1978;expected_accuracy=0.996         | 191  | 1844 | 29   | 191  | 321  | 197<br>5 | 1    | 172      |  |
| cb2640_c12/f1p0/3046                                              | gnl BL_ORD_ID 68660      cb2640_c13/f1p0/3176<br>isoform=cb2640_c12;full_length_coverage=1;non_full_length_coverage=0;isoform_length=3046;expected_accuracy=0.994       | 192  | 3046 | 16   | 193  | 309  | 316<br>0 | 2    | 204      |  |
| cb2097_c120/f1p0/1809                                             | gnl BL_ORD_ID 66704      cb2097_c75/f1p0/2500<br>isoform=cb2097_c120;full_length_coverage=1;non_full_length_coverage=0;isoform_length=1809;expected_accuracy=0.994      | 1    | 1422 | 1420 | 1809 | 509  | 193<br>0 | 2040 | 242<br>8 |  |

|                         |                                                                                                                                                                         |     |      |      |      |     |      |      |      |
|-------------------------|-------------------------------------------------------------------------------------------------------------------------------------------------------------------------|-----|------|------|------|-----|------|------|------|
| cb8564_c15653/f1p4/2475 | gnl BL_ORD_ID 10681      cb8564_c10952/f1p1/2673<br>isoform=cb8564_c10952;full_length_coverage=1;non_full_length_coverage=1;isoform_length=2673;expected_accuracy=0.992 | 1   | 2293 | 2289 | 2432 | 2   | 2303 | 2525 | 2671 |
| cb5290_c64/f1p0/3128    | gnl BL_ORD_ID 44595      cb5290_c41/f1p1/3038<br>isoform=cb5290_c41;full_length_coverage=1;non_full_length_coverage=1;isoform_length=3038;expected_accuracy=0.997       | 1   | 1748 | 1747 | 2657 | 177 | 1924 | 2050 | 2960 |
| cb8564_c15653/f1p4/2475 | gnl BL_ORD_ID 14105      cb8564_c35314/f1p0/2682<br>isoform=cb8564_c35314;full_length_coverage=1;non_full_length_coverage=0;isoform_length=2682;expected_accuracy=0.994 | 1   | 2293 | 2289 | 2435 | 4   | 2314 | 2536 | 2682 |
| cb7815_c1/f8p1/2084     | gnl BL_ORD_ID 51548      cb7815_c8/f1p0/3813<br>isoform=cb7815_c1;full_length_coverage=8;non_full_length_coverage=1;isoform_length=2084;expected_accuracy=1.000         | 1   | 1350 | 1351 | 2029 | 84  | 1435 | 3031 | 3709 |
| cb7348_c14/f11p1/1632   | gnl BL_ORD_ID 8010      cb7348_c6/f1p0/1887<br>isoform=cb7348_c14;full_length_coverage=11;non_full_length_coverage=1;isoform_length=1632;expected_accuracy=1.000        | 1   | 1044 | 1041 | 1632 | 1   | 1046 | 1293 | 1886 |
| cb18456_c6530/f1p0/1200 | gnl BL_ORD_ID 35192      cb18456_c6313/f1p4/1799<br>isoform=cb18456_c6313;full_length_coverage=1;non_full_length_coverage=4;isoform_length=1799;expected_accuracy=0.990 | 260 | 1166 | 3    | 259  | 797 | 1702 | 7    | 266  |
| cb8564_c90990/f1p3/3338 | gnl BL_ORD_ID 16877      cb8564_c54048/f1p0/3516<br>isoform=cb8564_c54048;full_length_coverage=1;non_full_length_coverage=1;isoform_length=3516;expected_accuracy=0.994 | 1   | 2272 | 2272 | 3249 | 5   | 2283 | 2540 | 3516 |

|                                                                                                                     |                                                                                                                      |     |      |      |      |      |      |      |      |  |
|---------------------------------------------------------------------------------------------------------------------|----------------------------------------------------------------------------------------------------------------------|-----|------|------|------|------|------|------|------|--|
| cb8564_c52191/f1p0/2822                                                                                             | ll_length_coverage=0;isoform_length=3516;expected_accuracy=0.997<br>gnl BL_ORD_ID 16172      cb8564_c53024/f1p0/3159 |     |      |      |      |      |      |      |      |  |
| isoform=cb8564_c52191;full_length_coverage=1;non_full_length_coverage=0;isoform_length=2822;expected_accuracy=0.997 | isoform=cb8564_c53024;full_length_coverage=1;non_full_length_coverage=0;isoform_length=3159;expected_accuracy=0.996  | 114 | 1683 | 1680 | 2822 | 132  | 1699 | 2017 | 3157 |  |
| cb8564_c37361/f1p0/3076                                                                                             | gnl BL_ORD_ID 16447      cb8564_c47202/f1p0/3195                                                                     |     |      |      |      |      |      |      |      |  |
| isoform=cb8564_c47202;full_length_coverage=1;non_full_length_coverage=0;isoform_length=3195;expected_accuracy=0.996 | isoform=cb8564_c47202;full_length_coverage=1;non_full_length_coverage=0;isoform_length=3195;expected_accuracy=0.996  | 1   | 2481 | 2477 | 3067 | 1    | 2482 | 2583 | 3195 |  |
| cb6716_c4/f1p0/2291                                                                                                 | gnl BL_ORD_ID 4049      cb6716_c0/f2p2/2584                                                                          |     |      |      |      |      |      |      |      |  |
| isoform=cb6716_c0;full_length_coverage=2;non_full_length_coverage=2;isoform_length=2584;expected_accuracy=1.000     | isoform=cb6716_c0;full_length_coverage=2;non_full_length_coverage=2;isoform_length=2584;expected_accuracy=1.000      | 1   | 1816 | 1815 | 2239 | 81   | 1896 | 2157 | 2582 |  |
| cb18649_c2/f1p0/3942                                                                                                | gnl BL_ORD_ID 69440      cb18649_c7/f1p0/5612                                                                        |     |      |      |      |      |      |      |      |  |
| isoform=cb18649_c2;full_length_coverage=1;non_full_length_coverage=0;isoform_length=3942;expected_accuracy=0.993    | isoform=cb18649_c7;full_length_coverage=1;non_full_length_coverage=0;isoform_length=5612;expected_accuracy=0.993     | 1   | 2588 | 2587 | 3940 | 1111 | 3700 | 3930 | 5282 |  |
| cb1279_c10/f2p0/2859                                                                                                | gnl BL_ORD_ID 27063      cb1279_c42/f1p0/3192                                                                        |     |      |      |      |      |      |      |      |  |
| isoform=cb1279_c10;full_length_coverage=2;non_full_length_coverage=0;isoform_length=2859;expected_accuracy=0.999    | isoform=cb1279_c42;full_length_coverage=1;non_full_length_coverage=0;isoform_length=3192;expected_accuracy=0.993     | 1   | 1853 | 1849 | 2859 | 11   | 1865 | 2153 | 3160 |  |
| cb8564_c3788/f1p1/2424                                                                                              | gnl BL_ORD_ID 14925      cb8564_c3785/f1p0/2806                                                                      |     |      |      |      |      |      |      |      |  |
| isoform=cb8564_c3785;full_length_coverage=1;non_full_length_coverage=0;isoform_length=2806;expected_accuracy=0.990  | isoform=cb8564_c3785;full_length_coverage=1;non_full_length_coverage=0;isoform_length=2806;expected_accuracy=0.990   | 1   | 2114 | 2114 | 2411 | 246  | 2358 | 2509 | 2806 |  |



|                                                                                                                                                  |                                                                                                                                                              |     |      |      |      |      |      |      |      |
|--------------------------------------------------------------------------------------------------------------------------------------------------|--------------------------------------------------------------------------------------------------------------------------------------------------------------|-----|------|------|------|------|------|------|------|
| cb8564_c150144/f1p7/2784<br>isoform=cb8564_c150144;full_length_coverage=1;non_full_length_coverage=7;isoform_length=2784;expected_accuracy=0.991 | gnl BL_ORD_ID 55920 cb8564_c48949/f1p0/4357                                                                                                                  | 1   | 2289 | 2290 | 2784 | 1    | 2293 | 2847 | 3336 |
| cb8478_c39/f1p0/3267<br>isoform=cb8478_c39;full_length_coverage=1;non_full_length_coverage=0;isoform_length=3267;expected_accuracy=1.000         | gnl BL_ORD_ID 10224 cb8478_c13/f2p0/3348<br>isoform=cb8478_c13;full_length_coverage=2;non_full_length_coverage=0;isoform_length=3348;expected_accuracy=1.000 | 2   | 2959 | 2959 | 3149 | 77   | 3031 | 3157 | 3348 |
| cb17862_c4/f1p0/1707<br>isoform=cb17862_c4;full_length_coverage=1;non_full_length_coverage=0;isoform_length=1707;expected_accuracy=0.995         | gnl BL_ORD_ID 5716 cb6802_c23/f1p0/4851<br>isoform=cb6802_c23;full_length_coverage=1;non_full_length_coverage=0;isoform_length=4851;expected_accuracy=0.995  | 517 | 1682 | 64   | 517  | 3680 | 4850 | 718  | 1173 |
| cb16877_c0/f1p0/1735<br>isoform=cb16877_c0;full_length_coverage=1;non_full_length_coverage=0;isoform_length=1735;expected_accuracy=0.996         | gnl BL_ORD_ID 53708 cb8564_c1398/f1p0/2214                                                                                                                   | 110 | 1735 | 1    | 111  | 454  | 2072 | 1    | 111  |
| cb3878_c4/f1p0/2331<br>isoform=cb3878_c4;full_length_coverage=1;non_full_length_coverage=0;isoform_length=2331;expected_accuracy=0.996           | gnl BL_ORD_ID 70667 cb3878_c2/f1p0/3504                                                                                                                      | 1   | 1163 | 1162 | 2197 | 1    | 1160 | 2462 | 3499 |
| cb4016_c16/f3p2/2553<br>isoform=cb4016_c16;full_length_coverage=3;non_full_length_coverage=2;isoform_length=2553;expected_accuracy=0.996         | gnl BL_ORD_ID 70718 cb4016_c29/f1p0/2693                                                                                                                     | 1   | 1400 | 1401 | 2464 | 87   | 1484 | 1605 | 2668 |
| cb762_c17/f1p0/3793<br>isoform=cb762_c17;full_length_coverage=1;non_full_length_coverage=0;isoform_length=3793;expected_accuracy=0.994           | gnl BL_ORD_ID 8135 cb762_c1/f2p0/4120<br>isoform=cb762_c1;full_length_coverage=2;non_full_length_coverage=0;isoform_length=4120;expected_accuracy=0.994      | 1   | 2720 | 2718 | 3630 | 31   | 2745 | 3209 | 4120 |

|                                                                                                                                        |                                                                                                                                                                             |     |      |      |      |      |          |      |          |
|----------------------------------------------------------------------------------------------------------------------------------------|-----------------------------------------------------------------------------------------------------------------------------------------------------------------------------|-----|------|------|------|------|----------|------|----------|
| cb6548_c2/f6p1/2451<br>isoform=cb6548_c2;full_length_coverage=6;non_full_length_coverage=1;isoform_length=2451;expected_accuracy=0.999 | gnl BL_ORD_ID 5637      cb6548_c10/f1p1/2515<br>isoform=cb6548_c10;full_length_coverage=1;non_full_length_coverage=1;isoform_length=2515;expected_accuracy=0.991            | 251 | 2409 | 50   | 252  | 345  | 251<br>5 | 1    | 209      |
| cb8564_c78476/f1p0/3130                                                                                                                | gnl BL_ORD_ID 57891      cb8564_c83487/f1p0/3257                                                                                                                            | 12  | 1640 | 1640 | 2539 | 12   | 163<br>9 | 2005 | 290<br>4 |
| cb8564_c123717/f1p0/2918                                                                                                               | gnl BL_ORD_ID 53318      cb8564_c121948/f1p0/3245                                                                                                                           | 252 | 2909 | 14   | 253  | 370  | 302<br>7 | 11   | 259      |
| cb12989_c1/f1p0/1037                                                                                                                   | gnl BL_ORD_ID 25460      cb12989_c0/f4p0/1107<br>isoform=cb12989_c0;full_length_coverage=4;non_full_length_coverage=0;isoform_length=1107;expected_accuracy=1.000           | 332 | 1005 | 8    | 334  | 435  | 1107     | 1    | 324      |
| cb7761_c6/f1p0/2339<br>isoform=cb7761_c6;full_length_coverage=1;non_full_length_coverage=0;isoform_length=2339;expected_accuracy=0.994 | gnl BL_ORD_ID 7623      cb7761_c5/f1p0/2537<br>isoform=cb7761_c5;full_length_coverage=1;non_full_length_coverage=0;isoform_length=2537;expected_accuracy=0.993              | 1   | 1121 | 1121 | 2319 | 52   | 1173     | 1358 | 253<br>7 |
| cb8564_c75977/f1p0/2165                                                                                                                | gnl BL_ORD_ID 11679      cb8564_c146299/f10p7/3623<br>isoform=cb8564_c146299;full_length_coverage=10;non_full_length_coverage=7;isoform_length=3623;expected_accuracy=0.999 | 1   | 1393 | 1394 | 2130 | 67   | 145<br>9 | 2747 | 348<br>3 |
| cb4487_c20/f1p0/1667                                                                                                                   | gnl BL_ORD_ID 43638      cb4487_c5/f5p0/3334<br>isoform=cb4487_c5;full_length_coverage=5;non_full_length_coverage=0;isoform_length=3334;expected_accuracy=1.000             | 267 | 1557 | 3    | 270  | 1984 | 327<br>4 | 85   | 352      |
| cb6816_c2/f1p0/2039                                                                                                                    | gnl BL_ORD_ID 5381      cb6816_c0/f1p0/2763<br>isoform=cb6816_c0;full_length_coverage=1;non_full_length_coverage=0;isoform_length=2763;expected_accuracy=1.000              | 40  | 1000 | 995  | 1834 | 51   | 102<br>9 | 1924 | 276<br>3 |



|                                                                                                                                                |                                                                                                                                                              |     |      |      |      |     |      |      |      |
|------------------------------------------------------------------------------------------------------------------------------------------------|--------------------------------------------------------------------------------------------------------------------------------------------------------------|-----|------|------|------|-----|------|------|------|
| cb8564_c12805/f1p0/2580<br>isoform=cb8564_c12805;full_length_coverage=1;non_full_length_coverage=0;isoform_length=2580;expected_accuracy=0.993 | gnl BL_ORD_ID 56759 cb8564_c70577/f1p0/3111                                                                                                                  | 11  | 1695 | 1690 | 2580 | 1   | 1687 | 1929 | 2822 |
| cb5780_c3/f2p0/3092<br>isoform=cb5780_c3;full_length_coverage=2;non_full_length_coverage=0;isoform_length=3092;expected_accuracy=0.998         | gnl BL_ORD_ID 46054 cb5780_c12/f1p0/3428<br>isoform=cb5780_c12;full_length_coverage=1;non_full_length_coverage=0;isoform_length=3428;expected_accuracy=0.999 | 109 | 2322 | 2320 | 3073 | 1   | 2214 | 2675 | 3428 |
| cb4016_c17/f1p0/2709<br>isoform=cb4016_c17;full_length_coverage=1;non_full_length_coverage=0;isoform_length=2709;expected_accuracy=0.995       | gnl BL_ORD_ID 40529 cb4016_c2/f3p1/2863<br>isoform=cb4016_c2;full_length_coverage=3;non_full_length_coverage=1;isoform_length=2863;expected_accuracy=0.998   | 185 | 2709 | 1    | 187  | 326 | 2849 | 4    | 189  |
| cb5962_c9/f1p2/2694<br>isoform=cb5962_c9;full_length_coverage=1;non_full_length_coverage=2;isoform_length=2694;expected_accuracy=0.998         | gnl BL_ORD_ID 45736 cb5962_c4/f3p6/2935<br>isoform=cb5962_c4;full_length_coverage=3;non_full_length_coverage=6;isoform_length=2935;expected_accuracy=0.998   | 1   | 1390 | 1386 | 2694 | 4   | 1393 | 1527 | 2836 |
| cb5610_c20/f1p0/2091                                                                                                                           | gnl BL_ORD_ID 45980 cb5610_c17/f1p1/2257<br>isoform=cb5610_c17;full_length_coverage=1;non_full_length_coverage=1;isoform_length=2257;expected_accuracy=0.990 | 154 | 2040 | 1    | 155  | 281 | 2166 | 27   | 181  |
| cb4949_c11/f1p0/2473<br>isoform=cb4949_c11;full_length_coverage=1;non_full_length_coverage=0;isoform_length=2473;expected_accuracy=0.999       | gnl BL_ORD_ID 42811 cb4949_c3/f1p0/3120<br>isoform=cb4949_c3;full_length_coverage=1;non_full_length_coverage=0;isoform_length=3120;expected_accuracy=0.991   | 1   | 1902 | 1900 | 2409 | 1   | 1921 | 2609 | 3120 |
| cb9199_c4/f4p0/1836<br>isoform=cb9199_c4;full_length_coverage=4;non_full_length_coverage=0;isoform_length=1836;expected_accuracy=0.999         | gnl BL_ORD_ID 59568 cb9199_c14/f1p0/2004                                                                                                                     | 13  | 1002 | 999  | 1763 | 1   | 993  | 1236 | 2000 |



|                                                                                                                                                  |                                                                                                                                                                      |     |      |      |      |      |     |      |     |   |   |
|--------------------------------------------------------------------------------------------------------------------------------------------------|----------------------------------------------------------------------------------------------------------------------------------------------------------------------|-----|------|------|------|------|-----|------|-----|---|---|
| ull_length_coverage=0;isoform_length=1776;expected_accuracy=0.993                                                                                |                                                                                                                                                                      |     |      |      |      |      |     |      |     |   |   |
| cb8564_c46939/f1p1/2926                                                                                                                          | gnl BL_ORD_ID 55211 cb8564_c35547/f1p0/3745                                                                                                                          | 1   | 2134 | 2130 | 2870 | 9    | 215 | 2258 | 299 | 3 | 8 |
| cb8564_c841/f3p2/2127<br>isoform=cb8564_c841;full_length_coverage=3;non_full_length_coverage=2;isoform_length=2127;expected_accuracy=0.998       | gnl BL_ORD_ID 12361 cb8564_c1392/f1p1/3024<br>isoform=cb8564_c1392;full_length_coverage=1;non_full_length_coverage=1;isoform_length=3024;expected_accuracy=0.993     | 1   | 1516 | 1517 | 2127 | 51   | 156 | 2412 | 302 | 1 | 2 |
| cb401_c157/f2p0/2398<br>isoform=cb401_c157;full_length_coverage=2;non_full_length_coverage=0;isoform_length=2398;expected_accuracy=0.995         | gnl BL_ORD_ID 70873 cb401_c42/f1p0/2704                                                                                                                              | 1   | 1676 | 1674 | 2351 | 3    | 167 | 2018 | 269 | 9 | 8 |
| cb8564_c50835/f1p0/2578                                                                                                                          | gnl BL_ORD_ID 55917 cb8564_c48916/f1p0/3009                                                                                                                          | 606 | 2580 | 78   | 609  | 900  | 287 | 26   | 556 | 4 |   |
| cb8564_c34638/f1p0/2817<br>isoform=cb8564_c34638;full_length_coverage=1;non_full_length_coverage=0;isoform_length=2817;expected_accuracy=0.992   | gnl BL_ORD_ID 18852 cb8564_c84488/f1p0/3408<br>isoform=cb8564_c84488;full_length_coverage=1;non_full_length_coverage=0;isoform_length=3408;expected_accuracy=0.996   | 219 | 2813 | 1    | 219  | 790  | 340 | 1    | 217 | 8 |   |
| cb8564_c87455/f1p0/2321                                                                                                                          | gnl BL_ORD_ID 52655 cb8564_c10124/f1p0/3457                                                                                                                          | 1   | 1494 | 1492 | 2223 | 26   | 151 | 2675 | 340 | 9 | 6 |
| cb8564_c146513/f2p1/3281<br>isoform=cb8564_c146513;full_length_coverage=2;non_full_length_coverage=1;isoform_length=3281;expected_accuracy=0.997 | gnl BL_ORD_ID 12106 cb8564_c146659/f3p0/3534<br>isoform=cb8564_c146659;full_length_coverage=3;non_full_length_coverage=0;isoform_length=3534;expected_accuracy=0.998 | 1   | 2076 | 2074 | 3281 | 8    | 209 | 2324 | 353 | 5 | 4 |
| cb10132_c18/f1p1/1347                                                                                                                            | gnl BL_ORD_ID 18242 cb8564_c83110/f1p1/2442<br>isoform=cb8564_c83110;full_length_coverage=1;non_full_length_coverage=0;isoform_length=2442;expected_accuracy=0.993   | 281 | 1302 | 42   | 283  | 1386 | 240 | 122  | 362 | 1 |   |

|                                                                                                                     |                                                                                                                       |     |      |      |      |     |      |      |     |   |   |
|---------------------------------------------------------------------------------------------------------------------|-----------------------------------------------------------------------------------------------------------------------|-----|------|------|------|-----|------|------|-----|---|---|
|                                                                                                                     | ll_length_coverage=1;isoform_length=2442;expected_accuracy=0.997                                                      |     |      |      |      |     |      |      |     |   |   |
| cb8564_c2600/f1p0/2432                                                                                              |                                                                                                                       |     |      |      |      |     |      |      |     |   |   |
| isoform=cb8564_c2600;full_length_coverage=1;non_full_length_coverage=0;isoform_length=2432;expected_accuracy=1.000  | gnl BL_ORD_ID 54001 cb8564_c16726/f1p0/2596                                                                           | 1   | 1400 | 1399 | 2411 | 4   | 139  | 1508 | 252 | 1 | 0 |
| cb9583_c6/f1p0/1811                                                                                                 | gnl BL_ORD_ID 19510 cb9583_c3/f1p0/2043                                                                               |     |      |      |      |     |      |      |     |   |   |
| isoform=cb9583_c6;full_length_coverage=1;non_full_length_coverage=0;isoform_length=1811;expected_accuracy=0.993     | isoform=cb9583_c3;full_length_coverage=1;non_full_length_coverage=0;isoform_length=2043;expected_accuracy=0.999       | 210 | 1795 | 9    | 209  | 454 | 204  | 6    | 203 | 2 |   |
| cb8564_c78626/f1p0/2262                                                                                             |                                                                                                                       |     |      |      |      |     |      |      |     |   |   |
| isoform=cb8564_c78626;full_length_coverage=1;non_full_length_coverage=0;isoform_length=2262;expected_accuracy=0.997 | gnl BL_ORD_ID 57135 cb8564_c84378/f1p1/2886                                                                           | 1   | 1196 | 1195 | 2262 | 1   | 1196 | 1717 | 278 |   | 4 |
| cb8564_c38035/f1p0/2770                                                                                             | gnl BL_ORD_ID 55607 cb8564_c46612/f1p1/3367                                                                           | 1   | 2035 | 2033 | 2756 | 8   | 204  | 2233 | 296 | 3 | 2 |
| cb8564_c46321/f1p2/2987                                                                                             | gnl BL_ORD_ID 14531 cb8564_c41778/f1p9/3482                                                                           |     |      |      |      |     |      |      |     |   |   |
| isoform=cb8564_c41778;full_length_coverage=1;non_full_length_coverage=9;isoform_length=3482;expected_accuracy=0.992 | isoform=cb8564_c41778;full_length_coverage=1;non_full_length_coverage=9;isoform_length=3482;expected_accuracy=0.992   | 260 | 2872 | 26   | 264  | 812 | 342  | 7    | 247 | 6 |   |
| cb8564_c44004/f1p0/2796                                                                                             | gnl BL_ORD_ID 12978 cb8564_c175946/f10p1/3002                                                                         |     |      |      |      |     |      |      |     |   |   |
| isoform=cb8564_c44004;full_length_coverage=1;non_full_length_coverage=0;isoform_length=2796;expected_accuracy=1.000 | isoform=cb8564_c175946;full_length_coverage=10;non_full_length_coverage=1;isoform_length=3002;expected_accuracy=1.000 | 1   | 1549 | 1546 | 2795 | 72  | 162  | 1754 | 300 | 0 | 2 |
| cb8564_c4643/f1p1/2554                                                                                              | gnl BL_ORD_ID 16733 cb8564_c583/f12p2/2795                                                                            |     |      |      |      |     |      |      |     |   |   |
| isoform=cb8564_c583;full_length_coverage=12;non_full_length_coverage=0;isoform_length=2554;expected_accuracy=0.997  | isoform=cb8564_c583;full_length_coverage=12;non_full_length_coverage=0;isoform_length=2554;expected_accuracy=0.997    | 1   | 1705 | 1700 | 2552 | 29  | 173  | 1866 | 271 | 3 | 9 |

|                                                                                                                                              |                                                                                                                                                                    |      |      |      |      |      |      |      |      |  |
|----------------------------------------------------------------------------------------------------------------------------------------------|--------------------------------------------------------------------------------------------------------------------------------------------------------------------|------|------|------|------|------|------|------|------|--|
|                                                                                                                                              | l_length_coverage=2;isoform_length=2795;expected_accuracy=1.000                                                                                                    |      |      |      |      |      |      |      |      |  |
| cb6757_c10/f1p0/2627                                                                                                                         | gnl BL_ORD_ID 50029 cb6757_c6/f1p0/4618                                                                                                                            | 1    | 1319 | 1317 | 2488 | 1    | 1319 | 3410 | 4580 |  |
| cb8564_c10938/f1p1/2321                                                                                                                      | gnl BL_ORD_ID 10628 cb8564_c10567/f1p5/3651<br>isoform=cb8564_c10567;full_length_coverage=1;non_full_length_coverage=5;isoform_length=3651;expected_accuracy=0.996 | 1    | 1315 | 1310 | 2292 | 1196 | 2509 | 2628 | 3610 |  |
| cb3833_c5/f1p0/1849<br>isoform=cb3833_c5;full_length_coverage=1;non_full_length_coverage=0;isoform_length=1849;expected_accuracy=0.992       | gnl BL_ORD_ID 71542 cb3833_c1/f1p0/3501                                                                                                                            | 312  | 1849 | 74   | 313  | 1875 | 3408 | 1    | 250  |  |
| cb897_c39/f1p0/2987<br>isoform=cb897_c39;full_length_coverage=1;non_full_length_coverage=0;isoform_length=2987;expected_accuracy=0.991       | gnl BL_ORD_ID 59072 cb897_c18/f1p0/3399                                                                                                                            | 1305 | 2987 | 126  | 1308 | 1509 | 3195 | 1    | 1187 |  |
| cb2625_c9/f1p0/2161                                                                                                                          | gnl BL_ORD_ID 38294 cb2625_c8/f1p0/2457<br>isoform=cb2625_c8;full_length_coverage=1;non_full_length_coverage=0;isoform_length=2457;expected_accuracy=0.997         | 1    | 1470 | 1468 | 2136 | 119  | 1588 | 1789 | 2457 |  |
| cb8564_c2753/f1p0/2971<br>isoform=cb8564_c2753;full_length_coverage=1;non_full_length_coverage=0;isoform_length=2971;expected_accuracy=0.997 | gnl BL_ORD_ID 54800 cb8564_c2742/f1p0/3521                                                                                                                         | 1449 | 2956 | 1    | 1449 | 1639 | 3145 | 1    | 1449 |  |
| cb8564_c71076/f1p2/2391                                                                                                                      | gnl BL_ORD_ID 56072 cb8564_c54171/f1p0/3438                                                                                                                        | 142  | 2424 | 1    | 142  | 598  | 2880 | 297  | 438  |  |



|                                                                                                                                                  |                                                                                                                                                              |      |      |      |      |      |          |      |          |
|--------------------------------------------------------------------------------------------------------------------------------------------------|--------------------------------------------------------------------------------------------------------------------------------------------------------------|------|------|------|------|------|----------|------|----------|
| cb8564_c47011/f1p0/3100                                                                                                                          | gnl BL_ORD_ID 55472 cb8564_c42531/f1p0/3996                                                                                                                  | 133  | 2306 | 2301 | 2934 | 816  | 298<br>7 | 3225 | 385<br>8 |
| cb8564_c148479/f1p0/3197<br>isoform=cb8564_c148479;full_length_coverage=1;non_full_length_coverage=0;isoform_length=3197;expected_accuracy=0.997 | gnl BL_ORD_ID 52737 cb8564_c12549/f1p0/4073                                                                                                                  | 1    | 2459 | 2455 | 3176 | 24   | 248<br>2 | 3341 | 406<br>2 |
| cb4838_c4/f1p0/1068<br>isoform=cb4838_c4;full_length_coverage=1;non_full_length_coverage=0;isoform_length=1068;expected_accuracy=1.000           | gnl BL_ORD_ID 41739 cb4838_c3/f1p0/1177<br>isoform=cb4838_c3;full_length_coverage=1;non_full_length_coverage=0;isoform_length=1177;expected_accuracy=0.999   | 176  | 1068 | 7    | 177  | 289  | 1177     | 1    | 170      |
| cb16776_c18/f1p0/6115                                                                                                                            | gnl BL_ORD_ID 66941 cb16776_c23/f1p0/5901                                                                                                                    | 2187 | 5884 | 199  | 2188 | 2099 | 579<br>7 | 1    | 198<br>9 |
| cb1193_c13/f1p1/3683                                                                                                                             | gnl BL_ORD_ID 59251 cb1193_c27/f1p0/3958                                                                                                                     | 11   | 1867 | 1864 | 3686 | 8    | 186<br>5 | 2014 | 383<br>6 |
| cb8564_c110954/f1p1/2392<br>isoform=cb8564_c110954;full_length_coverage=1;non_full_length_coverage=1;isoform_length=2392;expected_accuracy=0.994 | gnl BL_ORD_ID 54760 cb8564_c174230/f1p1/2759                                                                                                                 | 1    | 2113 | 2109 | 2392 | 86   | 222<br>4 | 2412 | 269<br>4 |
| cb5057_c2/f3p0/1613<br>isoform=cb5057_c2;full_length_coverage=3;non_full_length_coverage=0;isoform_length=1613;expected_accuracy=1.000           | gnl BL_ORD_ID 43283 cb5057_c11/f1p0/1761<br>isoform=cb5057_c11;full_length_coverage=1;non_full_length_coverage=0;isoform_length=1761;expected_accuracy=0.995 | 1    | 1264 | 1263 | 1613 | 1    | 126<br>4 | 1373 | 172<br>2 |
| cb12363_c5/f1p0/1088<br>isoform=cb12363_c5;full_length_coverage=1;non_full_length_coverage=0;isoform_length=1088;expected_accuracy=1.000         | gnl BL_ORD_ID 5094 cb6700_c9/f1p0/2495<br>isoform=cb6700_c9;full_length_coverage=1;non_full_length_coverage=0;isoform_length=2495;expected_accuracy=0.993    | 158  | 1051 | 3    | 162  | 1604 | 249<br>5 | 1070 | 122<br>7 |

|                          |                                                                                                                                                                                           |     |      |      |      |     |          |      |          |
|--------------------------|-------------------------------------------------------------------------------------------------------------------------------------------------------------------------------------------|-----|------|------|------|-----|----------|------|----------|
| cb7412_c16/f1p0/1476     | gnl BL_ORD_ID 7462                      cb7412_c7/f1p2/2560<br>isoform=cb7412_c7;full_length_coverage=1;non_full_length_coverage=2;isoform_length=2560;expected_accuracy=0.994            | 1   | 1143 | 1142 | 1448 | 1   | 1140     | 2180 | 248<br>6 |
| cb8564_c37390/f1p0/2683  | gnl BL_ORD_ID 55828   cb8564_c42159/f1p0/3251<br>isoform=cb8564_c37390;full_length_coverage=1;non_full_length_coverage=0;isoform_length=2683;expected_accuracy=1.000                      | 265 | 2683 | 21   | 267  | 704 | 312<br>3 | 10   | 255      |
| cb8564_c2323/f1p0/2212   | gnl BL_ORD_ID 53846   cb8564_c2435/f1p1/2639<br>isoform=cb8564_c2323;full_length_coverage=1;non_full_length_coverage=0;isoform_length=2212;expected_accuracy=0.995                        | 1   | 1320 | 1316 | 2212 | 26  | 134<br>5 | 1623 | 251<br>9 |
| cb12685_c3/f1p2/1466     | gnl BL_ORD_ID 53630   cb8564_c134203/f1p0/3255<br>isoform=cb8564_c134203;full_length_coverage=1;non_full_length_coverage=0;isoform_length=3255;expected_accuracy=0.991                    | 1   | 1294 | 1292 | 1463 | 15  | 131<br>2 | 2900 | 306<br>8 |
| cb8564_c120352/f1p2/2487 | gnl BL_ORD_ID 10012                      cb8564_c114725/f1p0/2945<br>isoform=cb8564_c114725;full_length_coverage=1;non_full_length_coverage=0;isoform_length=2945;expected_accuracy=0.991 | 1   | 1784 | 1783 | 2461 | 1   | 179<br>2 | 2265 | 294<br>5 |
| cb781_c2/f3p0/1827       | gnl BL_ORD_ID 6782                      cb781_c16/f1p0/1990<br>isoform=cb781_c2;full_length_coverage=3;non_full_length_coverage=0;isoform_length=1827;expected_accuracy=0.999             | 1   | 1243 | 1243 | 1806 | 82  | 132<br>4 | 1429 | 199<br>0 |
| cb8564_c182028/f1p0/2513 | gnl BL_ORD_ID 19279                      cb8564_c8088/f4p4/2776<br>isoform=cb8564_c182028;full_length_coverage=1;non_full_length_coverage=0;isoform_length=2513;expected_accuracy=0.996   | 1   | 1971 | 1968 | 2513 | 32  | 200<br>1 | 2145 | 269<br>0 |

|                                                                                                                                                  |                                                                                                                                                                      |     |      |      |      |      |      |      |      |
|--------------------------------------------------------------------------------------------------------------------------------------------------|----------------------------------------------------------------------------------------------------------------------------------------------------------------------|-----|------|------|------|------|------|------|------|
| cb5422_c3/f1p0/2208                                                                                                                              | gnl BL_ORD_ID 73898 cb5422_c10/f1p0/5864                                                                                                                             | 1   | 1312 | 1311 | 2019 | 3    | 1313 | 4803 | 5511 |
| cb8478_c24/f1p0/3383<br>isoform=cb8478_c24;full_length_coverage=1;non_full_length_coverage=0;isoform_length=3383;expected_accuracy=0.996         | gnl BL_ORD_ID 9933 cb8478_c26/f1p0/3535<br>isoform=cb8478_c26;full_length_coverage=1;non_full_length_coverage=0;isoform_length=3535;expected_accuracy=0.995          | 266 | 3335 | 1    | 265  | 463  | 3535 | 1    | 264  |
| cb3061_c27/f4p0/2371<br>isoform=cb3061_c27;full_length_coverage=4;non_full_length_coverage=0;isoform_length=2371;expected_accuracy=0.992         | gnl BL_ORD_ID 38031 cb3061_c7/f1p0/2487<br>isoform=cb3061_c7;full_length_coverage=1;non_full_length_coverage=0;isoform_length=2487;expected_accuracy=0.993           | 121 | 2342 | 1    | 122  | 275  | 2487 | 39   | 160  |
| cb8564_c43455/f1p0/2242<br>isoform=cb8564_c43455;full_length_coverage=1;non_full_length_coverage=0;isoform_length=2242;expected_accuracy=0.995   | gnl BL_ORD_ID 17173 cb8564_c98020/f5p12/4000<br>isoform=cb8564_c98020;full_length_coverage=5;non_full_length_coverage=12;isoform_length=4000;expected_accuracy=0.995 | 279 | 2242 | 5    | 282  | 1979 | 3944 | 1    | 276  |
| cb454_c11/f1p0/2332<br>isoform=cb454_c11;full_length_coverage=1;non_full_length_coverage=0;isoform_length=2332;expected_accuracy=0.992           | gnl BL_ORD_ID 70924 cb454_c27/f1p0/2557                                                                                                                              | 275 | 2325 | 49   | 274  | 335  | 2387 | 2    | 229  |
| cb8564_c188097/f1p0/2552<br>isoform=cb8564_c188097;full_length_coverage=1;non_full_length_coverage=0;isoform_length=2552;expected_accuracy=0.996 | gnl BL_ORD_ID 56670 cb8564_c51772/f1p0/2859                                                                                                                          | 1   | 1945 | 1940 | 2510 | 1    | 1946 | 2094 | 2664 |
| cb3848_c1/f4p0/2367<br>isoform=cb3848_c1;full_length_coverage=4;non_full_length_coverage=0;isoform_length=2367;expected_accuracy=0.995           | gnl BL_ORD_ID 39387 cb3848_c22/f1p1/3080<br>isoform=cb3848_c22;full_length_coverage=1;non_full_length_coverage=1;isoform_length=3080;expected_accuracy=0.998         | 1   | 2023 | 2021 | 2352 | 1    | 2021 | 2748 | 3080 |

|                                                                                                                                                  |                                                                                                                                                                           |     |      |      |      |      |      |      |      |
|--------------------------------------------------------------------------------------------------------------------------------------------------|---------------------------------------------------------------------------------------------------------------------------------------------------------------------------|-----|------|------|------|------|------|------|------|
| cb2026_c0/f2p0/3902<br>isoform=cb2026_c0;full_length_coverage=2;non_full_length_coverage=0;isoform_length=3902;expected_accuracy=1.000           | gnl BL_ORD_ID 35151          cb2026_c1/f1p0/4080<br>isoform=cb2026_c1;full_length_coverage=1;non_full_length_coverage=0;isoform_length=4080;expected_accuracy=0.994       | 1   | 3404 | 3401 | 3869 | 1    | 3378 | 3542 | 4006 |
| cb11952_c19/f1p0/1832                                                                                                                            | gnl BL_ORD_ID 14853          cb8564_c3817/f3p0/2841<br>isoform=cb8564_c3817;full_length_coverage=3;non_full_length_coverage=0;isoform_length=2841;expected_accuracy=0.996 | 366 | 1804 | 5    | 365  | 1401 | 2839 | 178  | 535  |
| cb12939_c8/f1p0/1310<br>isoform=cb12939_c8;full_length_coverage=1;non_full_length_coverage=0;isoform_length=1310;expected_accuracy=0.993         | gnl BL_ORD_ID 55736          cb8564_c5254/f1p0/2278                                                                                                                       | 109 | 1307 | 1    | 110  | 1098 | 2293 | 25   | 136  |
| cb10451_c11/f1p0/1745                                                                                                                            | gnl BL_ORD_ID 48536          cb10451_c7/f1p0/2052                                                                                                                         | 1   | 1312 | 1308 | 1716 | 35   | 1346 | 1456 | 1864 |
| cb1178_c17/f1p0/1559<br>isoform=cb1178_c17;full_length_coverage=1;non_full_length_coverage=0;isoform_length=1559;expected_accuracy=0.995         | gnl BL_ORD_ID 59230          cb1178_c9/f1p0/2856                                                                                                                          | 435 | 1528 | 48   | 435  | 1750 | 2843 | 1    | 388  |
| cb5125_c36/f1p0/1789<br>isoform=cb5125_c36;full_length_coverage=1;non_full_length_coverage=0;isoform_length=1789;expected_accuracy=0.998         | gnl BL_ORD_ID 42296          cb5125_c42/f1p3/2079<br>isoform=cb5125_c42;full_length_coverage=1;non_full_length_coverage=3;isoform_length=2079;expected_accuracy=0.992     | 1   | 1163 | 1158 | 1789 | 8    | 1175 | 1381 | 2014 |
| cb8564_c106740/f7p2/2421<br>isoform=cb8564_c106740;full_length_coverage=7;non_full_length_coverage=2;isoform_length=2421;expected_accuracy=1.000 | gnl BL_ORD_ID 52710          cb8564_c11928/f1p0/3418                                                                                                                      | 242 | 2360 | 8    | 244  | 1173 | 3291 | 1    | 239  |

|                          |                                                                                                                                                                        |      |      |      |      |      |      |      |      |
|--------------------------|------------------------------------------------------------------------------------------------------------------------------------------------------------------------|------|------|------|------|------|------|------|------|
| cb8564_c51971/f1p0/3064  | gnl BL_ORD_ID 9350      cb8564_c11826/f1p0/2916<br>isoform=cb8564_c11826;full_length_coverage=1;non_full_length_coverage=0;isoform_length=2916;expected_accuracy=0.997 | 1303 | 2676 | 10   | 1304 | 1543 | 2916 | 4    | 1296 |
| cb17388_c6/f1p2/1438     | gnl BL_ORD_ID 53482   cb8564_c126073/f1p1/2951<br>isoform=cb17388_c6;full_length_coverage=1;non_full_length_coverage=2;isoform_length=1438;expected_accuracy=0.992     | 1    | 1088 | 1086 | 1438 | 5    | 1092 | 1280 | 1632 |
| cb2818_c78/f1p0/2043     | gnl BL_ORD_ID 68908   cb2818_c62/f1p1/3434<br>isoform=cb2818_c78;full_length_coverage=1;non_full_length_coverage=0;isoform_length=2043;expected_accuracy=0.992         | 1    | 1936 | 1935 | 2039 | 909  | 2841 | 3236 | 3341 |
| cb7638_c8/f1p0/1378      | gnl BL_ORD_ID 8195      cb7638_c3/f1p0/1953<br>isoform=cb7638_c8;full_length_coverage=1;non_full_length_coverage=0;isoform_length=1378;expected_accuracy=0.999         | 1    | 1050 | 1049 | 1378 | 46   | 1093 | 1239 | 1569 |
| cb8564_c115486/f1p1/3203 | gnl BL_ORD_ID 53615   cb8564_c130071/f1p0/4218                                                                                                                         | 98   | 3139 | 1    | 102  | 531  | 3563 | 108  | 210  |
| cb7150_c0/f2p0/2634      | gnl BL_ORD_ID 5101      cb7150_c3/f1p0/3108<br>isoform=cb7150_c0;full_length_coverage=2;non_full_length_coverage=0;isoform_length=2634;expected_accuracy=1.000         | 1    | 2335 | 2335 | 2634 | 48   | 2372 | 2782 | 3081 |
| cb4848_c24/f1p0/1860     | gnl BL_ORD_ID 72032   cb4848_c9/f1p1/2843<br>isoform=cb4848_c24;full_length_coverage=1;non_full_length_coverage=0;isoform_length=1860;expected_accuracy=0.999          | 206  | 1860 | 5    | 205  | 1010 | 2662 | 242  | 442  |

|                          |                                                                                                                                                                            |      |      |      |      |      |      |      |      |
|--------------------------|----------------------------------------------------------------------------------------------------------------------------------------------------------------------------|------|------|------|------|------|------|------|------|
| cb466_c13/flp0/3021      | gnl BL_ORD_ID 41725      cb466_c0/fl10p1/3978<br>isoform=cb466_c0;full_length_coverage=10;non_full_length_coverage=1;isoform_length=3978;expected_accuracy=1.000           | 213  | 2961 | 11   | 215  | 1227 | 3975 | 1    | 207  |
| cb3653_c3/flp0/1932      | gnl BL_ORD_ID 39077      cb3653_c1/f2p0/2318<br>isoform=cb3653_c3;full_length_coverage=1;non_full_length_coverage=0;isoform_length=1932;expected_accuracy=0.994            | 457  | 1910 | 9    | 459  | 869  | 2318 | 1    | 450  |
| cb8564_c53418/flp0/2602  | gnl BL_ORD_ID 12921      cb8564_c17543/fl1p10/2689<br>isoform=cb8564_c53418;full_length_coverage=1;non_full_length_coverage=0;isoform_length=2602;expected_accuracy=0.991  | 1163 | 2472 | 1    | 1168 | 1273 | 2585 | 4    | 1172 |
| cb6181_c34/flp0/2542     | gnl BL_ORD_ID 6168      cb6181_c17/fl1p0/2583<br>isoform=cb6181_c17;full_length_coverage=1;non_full_length_coverage=0;isoform_length=2583;expected_accuracy=0.994          | 1    | 1267 | 1267 | 2285 | 1    | 1269 | 1487 | 2499 |
| cb8564_c188097/flp0/2552 | gnl BL_ORD_ID 13302      cb8564_c19160/fl1p2/2687<br>isoform=cb8564_c188097;full_length_coverage=1;non_full_length_coverage=0;isoform_length=2552;expected_accuracy=0.996  | 1    | 1945 | 1940 | 2551 | 1    | 1974 | 2077 | 2687 |
| cb2935_c37/flp0/2974     | gnl BL_ORD_ID 69017      cb2935_c40/fl1p0/3601<br>isoform=cb2935_c37;full_length_coverage=1;non_full_length_coverage=0;isoform_length=2974;expected_accuracy=0.995         | 1    | 1742 | 1737 | 2974 | 150  | 1894 | 2095 | 3333 |
| cb8564_c114960/flp2/3602 | gnl BL_ORD_ID 52943      cb8564_c112587/fl1p0/4698<br>isoform=cb8564_c114960;full_length_coverage=1;non_full_length_coverage=0;isoform_length=3602;expected_accuracy=0.995 | 1036 | 3561 | 1    | 1037 | 1326 | 3851 | 176  | 1213 |

|                                                                                                                                                                  |                                                                                                                                                                           |     |      |      |      |     |      |      |      |
|------------------------------------------------------------------------------------------------------------------------------------------------------------------|---------------------------------------------------------------------------------------------------------------------------------------------------------------------------|-----|------|------|------|-----|------|------|------|
| cb8564_c163331/f2p2/3571<br>isoform=cb8564_c163331;full_length_coverage=2;non_full_length_coverage=2;isoform_length=3571;expected_accuracy=0.996                 | gnl BL_ORD_ID 16525      cb8564_c74618/f1p0/3734<br>isoform=cb8564_c74618;full_length_coverage=1;non_full_length_coverage=0;isoform_length=3734;expected_accuracy=0.998   | 1   | 2488 | 2483 | 3566 | 41  | 2536 | 2650 | 3734 |
| cb8564_c16240/f1p3/2671<br>isoform=cb8564_c16240;full_length_coverage=1;non_full_length_coverage=3;isoform_length=2671;expected_accuracy=0.997                   | gnl BL_ORD_ID 18051      cb8564_c9825/f10p17/3363<br>isoform=cb8564_c9825;full_length_coverage=10;non_full_length_coverage=17;isoform_length=3363;expected_accuracy=0.999 | 2   | 2075 | 2072 | 2671 | 5   | 2071 | 2608 | 3208 |
| cb737_c27/f1p0/4113<br>cb500_c38/f1p0/2822<br>isoform=cb500_c38;full_length_coverage=1;non_full_length_coverage=0;isoform_length=2822;expected_accuracy=0.999    | gnl BL_ORD_ID 50933      cb737_c18/f1p0/4382<br>gnl BL_ORD_ID 72247      cb500_c49/f1p0/3666                                                                              | 106 | 3348 | 3347 | 4123 | 1   | 3244 | 3401 | 4180 |
| cb3941_c93/f1p0/2611<br>cb6063_c19/f1p1/2514<br>isoform=cb6063_c1;full_length_coverage=11;non_full_length_coverage=0;isoform_length=2691;expected_accuracy=1.000 | gnl BL_ORD_ID 71656      cb3941_c90/f1p0/4349<br>gnl BL_ORD_ID 45237      cb6063_c1/f11p0/2691                                                                            | 2   | 2200 | 2198 | 2626 | 29  | 2226 | 2466 | 2894 |
| cb500_c6/f4p0/3398<br>isoform=cb500_c6;full_length_coverage=4;non_full_length_coverage=0;isoform_length=3398;expected_accuracy=1.000                             | gnl BL_ORD_ID 72251      cb500_c68/f1p0/4152                                                                                                                              | 272 | 3356 | 1    | 276  | 961 | 4045 | 28   | 301  |
| cb8564_c123988/f1p0/2683                                                                                                                                         | gnl BL_ORD_ID 10158      cb8564_c108914/f6p2/2897<br>isoform=cb8564_c108914;full_length_coverage=6;non_f                                                                  | 1   | 2343 | 2344 | 2638 | 89  | 2431 | 2603 | 2897 |

|                                                                                                                                                |                                                                                                                                                                     |      |      |      |      |      |      |      |      |  |
|------------------------------------------------------------------------------------------------------------------------------------------------|---------------------------------------------------------------------------------------------------------------------------------------------------------------------|------|------|------|------|------|------|------|------|--|
|                                                                                                                                                | ull_length_coverage=2;isoform_length=2897;expected_accuracy=0.998                                                                                                   |      |      |      |      |      |      |      |      |  |
| cb7076_c12/f1p1/2435<br>isoform=cb7076_c12;full_length_coverage=1;non_full_length_coverage=1;isoform_length=2435;expected_accuracy=0.997       | gnl BL_ORD_ID 50315 cb7076_c3/f1p0/2554                                                                                                                             | 1    | 1850 | 1851 | 2384 | 10   | 1863 | 1995 | 2529 |  |
| cb12_c45/f1p0/4319<br>isoform=cb12_c45;full_length_coverage=1;non_full_length_coverage=0;isoform_length=4319;expected_accuracy=0.993           | gnl BL_ORD_ID 25321 cb12_c54/f1p0/8058<br>isoform=cb12_c54;full_length_coverage=1;non_full_length_coverage=0;isoform_length=8058;expected_accuracy=0.994            | 271  | 4273 | 1    | 273  | 4056 | 8058 | 2024 | 2292 |  |
| cb3632_c1/f1p0/2963<br>isoform=cb3632_c1;full_length_coverage=1;non_full_length_coverage=0;isoform_length=2963;expected_accuracy=0.996         | gnl BL_ORD_ID 71392 cb3632_c0/f1p0/3572                                                                                                                             | 1    | 2629 | 2629 | 2961 | 25   | 2651 | 3221 | 3553 |  |
| cb1438_c12/f1p0/3268                                                                                                                           | gnl BL_ORD_ID 63602 cb1438_c8/f1p0/4349                                                                                                                             | 1435 | 3296 | 1    | 1439 | 2219 | 4081 | 538  | 1978 |  |
| cb8564_c71076/f1p2/2391                                                                                                                        | gnl BL_ORD_ID 9367 cb8564_c107702/f7p2/2922<br>isoform=cb8564_c107702;full_length_coverage=7;non_full_length_coverage=2;isoform_length=2922;expected_accuracy=1.000 | 142  | 2424 | 1    | 142  | 632  | 2914 | 330  | 472  |  |
| cb8564_c22331/f1p0/4122<br>isoform=cb8564_c22331;full_length_coverage=1;non_full_length_coverage=0;isoform_length=4122;expected_accuracy=0.992 | gnl BL_ORD_ID 54049 cb8564_c17373/f1p2/4790                                                                                                                         | 2    | 3484 | 3485 | 4122 | 93   | 3558 | 3968 | 4607 |  |
| cb9549_c8/f1p0/1542<br>isoform=cb9549_c8;full_length_coverage=1;non_full_length_coverage=0;isoform_length=1542;expected_accuracy=0.992         | gnl BL_ORD_ID 21589 cb9549_c3/f1p0/1890<br>isoform=cb9549_c3;full_length_coverage=1;non_full_length_coverage=0;isoform_length=1890;expected_accuracy=0.992          | 114  | 1542 | 1    | 115  | 414  | 1843 | 129  | 243  |  |



|                                                                                                                                                                                                                                                                                                                                                                                                                                                                                               |                                                                                                                                                                                                                                                                                                                                                                                                                                                                                                                                                                                                                                                                                                                                                                                                                                                                                                                          |      |      |      |     |          |          |          |     |
|-----------------------------------------------------------------------------------------------------------------------------------------------------------------------------------------------------------------------------------------------------------------------------------------------------------------------------------------------------------------------------------------------------------------------------------------------------------------------------------------------|--------------------------------------------------------------------------------------------------------------------------------------------------------------------------------------------------------------------------------------------------------------------------------------------------------------------------------------------------------------------------------------------------------------------------------------------------------------------------------------------------------------------------------------------------------------------------------------------------------------------------------------------------------------------------------------------------------------------------------------------------------------------------------------------------------------------------------------------------------------------------------------------------------------------------|------|------|------|-----|----------|----------|----------|-----|
| ngth_coverage=0;isoform_length=1542;expected_accuracy=1.000<br>cb11590_c0/f1p0/1012<br>isoform=cb11590_c0;full_length_coverage=1;non_full_length_coverage=0;isoform_length=1012;expected_accuracy=0.999<br>cb4128_c23/f1p0/2488<br>isoform=cb4128_c23;full_length_coverage=1;non_full_length_coverage=0;isoform_length=2488;expected_accuracy=0.999<br>cb1366_c5/f1p0/1505<br>isoform=cb1366_c5;full_length_coverage=1;non_full_length_coverage=0;isoform_length=1505;expected_accuracy=0.997 | ngth_coverage=0;isoform_length=1890;expected_accuracy=1.000<br>gnl BL_ORD_ID 24735                      cb11590_c1/f1p0/3691<br>isoform=cb11590_c1;full_length_coverage=1;non_full_length_coverage=0;isoform_length=3691;expected_accuracy=0.996<br>gnl BL_ORD_ID 71807   cb4128_c11/f1p0/3379<br>gnl BL_ORD_ID 25706                      cb1366_c4/f1p0/1599<br>isoform=cb1366_c4;full_length_coverage=1;non_full_length_coverage=0;isoform_length=1599;expected_accuracy=0.995<br>gnl BL_ORD_ID 15663                      cb8564_c71422/f3p2/3204<br>isoform=cb8564_c71422;full_length_coverage=3;non_full_length_coverage=2;isoform_length=3204;expected_accuracy=0.998<br>gnl BL_ORD_ID 52842   cb8564_c15468/f1p0/3015<br>gnl BL_ORD_ID 18439                      cb8564_c87900/f1p0/2261<br>isoform=cb8564_c87900;full_length_coverage=1;non_full_length_coverage=0;isoform_length=2261;expected_accuracy=0.995 | 221  | 999  | 2    | 222 | 2915     | 369<br>1 | 23       | 243 |
| cb8564_c52278/f1p1/2746<br>cb8564_c48473/f1p2/2701<br>isoform=cb8564_c48473;full_length_coverage=1;non_full_length_coverage=2;isoform_length=2701;expected_accuracy=0.999<br>cb8564_c90372/f1p0/2157<br>isoform=cb8564_c90372;full_length_coverage=1;non_full_length_coverage=0;isoform_length=2157;expected_accuracy=0.994                                                                                                                                                                   | 1                                                                                                                                                                                                                                                                                                                                                                                                                                                                                                                                                                                                                                                                                                                                                                                                                                                                                                                        | 1757 | 1756 | 2488 | 70  | 183<br>0 | 2166     | 290<br>6 |     |
|                                                                                                                                                                                                                                                                                                                                                                                                                                                                                               | 1                                                                                                                                                                                                                                                                                                                                                                                                                                                                                                                                                                                                                                                                                                                                                                                                                                                                                                                        | 1016 | 1016 | 1483 | 4   | 101<br>7 | 1133     | 159<br>9 |     |
|                                                                                                                                                                                                                                                                                                                                                                                                                                                                                               | 14                                                                                                                                                                                                                                                                                                                                                                                                                                                                                                                                                                                                                                                                                                                                                                                                                                                                                                                       | 2531 | 2531 | 2667 | 1   | 251<br>8 | 3071     | 320<br>4 |     |
|                                                                                                                                                                                                                                                                                                                                                                                                                                                                                               | 220                                                                                                                                                                                                                                                                                                                                                                                                                                                                                                                                                                                                                                                                                                                                                                                                                                                                                                                      | 2630 | 1    | 225  | 410 | 281<br>9 | 41       | 266      |     |
|                                                                                                                                                                                                                                                                                                                                                                                                                                                                                               | 1                                                                                                                                                                                                                                                                                                                                                                                                                                                                                                                                                                                                                                                                                                                                                                                                                                                                                                                        | 1092 | 1088 | 2081 | 29  | 109<br>6 | 1268     | 226<br>1 |     |

|                                                                                                                                                  |                                                                                                                                          |                         |      |      |      |      |      |      |      |      |
|--------------------------------------------------------------------------------------------------------------------------------------------------|------------------------------------------------------------------------------------------------------------------------------------------|-------------------------|------|------|------|------|------|------|------|------|
| cb4805_c7/f1p0/2117<br>isoform=cb4805_c7;full_length_coverage=1;non_full_length_coverage=0;isoform_length=2117;expected_accuracy=0.994           | gnl BL_ORD_ID 42029<br>isoform=cb4805_c0;full_length_coverage=4;non_full_length_coverage=0;isoform_length=2407;expected_accuracy=1.000   | cb4805_c0/f4p0/2407     | 1    | 1754 | 1749 | 2084 | 22   | 1775 | 2069 | 2407 |
| cb8564_c180116/f1p0/2944<br>isoform=cb8564_c180116;full_length_coverage=1;non_full_length_coverage=0;isoform_length=2944;expected_accuracy=0.996 | gnl BL_ORD_ID 55472<br>isoform=cb8564_c42531/f1p0/3996                                                                                   | cb8564_c42531/f1p0/3996 | 129  | 2522 | 2520 | 2944 | 816  | 3208 | 3437 | 3861 |
| cb2177_c33/f1p1/2778<br>isoform=cb2177_c33;full_length_coverage=1;non_full_length_coverage=1;isoform_length=2778;expected_accuracy=0.999         | gnl BL_ORD_ID 35910<br>isoform=cb2177_c22;full_length_coverage=1;non_full_length_coverage=0;isoform_length=4026;expected_accuracy=0.997  | cb2177_c22/f1p0/4026    | 1279 | 2661 | 1    | 1280 | 2644 | 4026 | 48   | 1330 |
| cb8564_c938/f1p0/2388<br>isoform=cb8564_c938;full_length_coverage=1;non_full_length_coverage=0;isoform_length=2388;expected_accuracy=0.999       | gnl BL_ORD_ID 18451<br>isoform=cb8564_c956;full_length_coverage=2;non_full_length_coverage=0;isoform_length=2664;expected_accuracy=1.000 | cb8564_c956/f2p0/2664   | 534  | 2392 | 65   | 536  | 651  | 2510 | 41   | 518  |
| cb964_c18/f1p0/2779<br>isoform=cb964_c18;full_length_coverage=1;non_full_length_coverage=0;isoform_length=2779;expected_accuracy=0.995           | gnl BL_ORD_ID 21917<br>isoform=cb964_c11;full_length_coverage=1;non_full_length_coverage=0;isoform_length=2945;expected_accuracy=0.995   | cb964_c11/f1p0/2945     | 1    | 1665 | 1666 | 2585 | 257  | 1914 | 2026 | 2945 |
| cb1406_c5/f1p0/2334<br>isoform=cb1406_c5;full_length_coverage=1;non_full_length_coverage=0;isoform_length=2334;expected_accuracy=0.996           | gnl BL_ORD_ID 25275<br>isoform=cb1406_c14;full_length_coverage=1;non_full_length_coverage=1;isoform_length=5506;expected_accuracy=0.998  | cb1406_c14/f1p1/5506    | 214  | 2334 | 1    | 218  | 3315 | 5439 | 1    | 218  |
| cb3341_c13/f1p0/1618<br>isoform=cb3341_c13;full_length_coverage=1;non_full_length_coverage=0;isoform_length=1618;expected_accuracy=0.999         | gnl BL_ORD_ID 39643<br>isoform=cb3341_c4;full_length_coverage=3;non_full_length_coverage=0;isoform_length=1721;expected_accuracy=0.999   | cb3341_c4/f3p0/1721     | 539  | 1618 | 68   | 544  | 591  | 1671 | 4    | 488  |

|                                                                                                                     |                                                                                                                     |                         |     |      |      |      |     |      |      |     |
|---------------------------------------------------------------------------------------------------------------------|---------------------------------------------------------------------------------------------------------------------|-------------------------|-----|------|------|------|-----|------|------|-----|
| length_coverage=0;isoform_length=1618;expected_accuracy=0.998                                                       | gnl BL_ORD_ID 64376                                                                                                 | cb14968_c10/f1p0/1444   | 127 | 1227 | 8    | 127  | 235 | 133  | 6    | 121 |
| cb14968_c6/f1p0/1264                                                                                                | gnl BL_ORD_ID 17627                                                                                                 | cb8564_c86161/f2p0/2876 |     |      |      |      |     | 5    |      |     |
| cb8564_c107887/f1p0/2716                                                                                            | isoform=cb8564_c86161;full_length_coverage=2;non_full_length_coverage=0;isoform_length=2876;expected_accuracy=0.997 |                         | 1   | 1773 | 1772 | 2734 | 1   | 177  | 1904 | 286 |
| cb292_c26/f1p1/4089                                                                                                 | gnl BL_ORD_ID 38399                                                                                                 | cb292_c6/f1p0/4480      |     |      |      |      |     | 0    |      | 6   |
| cb292_c26/f1p1/4089                                                                                                 | isoform=cb292_c6;full_length_coverage=1;non_full_length_coverage=0;isoform_length=4480;expected_accuracy=0.997      |                         | 1   | 2048 | 2044 | 3906 | 61  | 210  | 2546 | 440 |
| cb4444_c12/f1p0/2629                                                                                                | gnl BL_ORD_ID 43609                                                                                                 | cb4444_c22/f1p0/3073    |     |      |      |      |     | 8    |      | 9   |
| cb4444_c12/f1p0/2629                                                                                                | isoform=cb4444_c22;full_length_coverage=1;non_full_length_coverage=0;isoform_length=3073;expected_accuracy=0.996    |                         | 363 | 2613 | 6    | 362  | 823 | 307  | 4    | 360 |
| cb2274_c9/f1p1/2153                                                                                                 | gnl BL_ORD_ID 37609                                                                                                 | cb2274_c10/f1p0/2302    |     |      |      |      |     | 0    |      |     |
| isoform=cb2274_c9;full_length_coverage=1;non_full_length_coverage=1;isoform_length=2153;expected_accuracy=0.994     | isoform=cb2274_c10;full_length_coverage=1;non_full_length_coverage=0;isoform_length=2302;expected_accuracy=0.999    |                         | 1   | 1152 | 1148 | 2107 | 1   | 1136 | 1340 | 230 |
| cb8564_c42387/f1p4/2973                                                                                             | gnl BL_ORD_ID 17429                                                                                                 | cb8564_c85447/f1p0/3196 |     |      |      |      |     |      |      | 2   |
| isoform=cb8564_c42387;full_length_coverage=1;non_full_length_coverage=4;isoform_length=2973;expected_accuracy=0.993 | isoform=cb8564_c85447;full_length_coverage=1;non_full_length_coverage=0;isoform_length=3196;expected_accuracy=0.997 |                         | 1   | 2428 | 2432 | 2973 | 3   | 241  | 2663 | 318 |
| cb8564_c87721/f1p0/2168                                                                                             | gnl BL_ORD_ID 16564                                                                                                 | cb8564_c69038/f4p3/2958 |     |      |      |      |     | 3    |      | 5   |
| isoform=cb8564_c87721;full_length_coverage=1;non_full_length_coverage=0;isoform_length=2168;expected_accuracy=0.997 | isoform=cb8564_c69038;full_length_coverage=4;non_full_length_coverage=0;isoform_length=2958;expected_accuracy=0.997 |                         | 1   | 1811 | 1809 | 2168 | 14  | 182  | 2474 | 283 |
| cb8564_c87721/f1p0/2168                                                                                             | isoform=cb8564_c69038;full_length_coverage=4;non_full_length_coverage=0;isoform_length=2958;expected_accuracy=0.997 |                         |     |      |      |      |     | 7    |      | 3   |

|                                                                                                                                                                                                                                                                                                                                                                                                                                                                                                                                                                                                                                                                                                                                                                                                                                                                                                                                                     |                                                                                                                                                                                                                                                                                                                                                                                                                                                                                                                     |     |      |      |      |      |          |      |          |
|-----------------------------------------------------------------------------------------------------------------------------------------------------------------------------------------------------------------------------------------------------------------------------------------------------------------------------------------------------------------------------------------------------------------------------------------------------------------------------------------------------------------------------------------------------------------------------------------------------------------------------------------------------------------------------------------------------------------------------------------------------------------------------------------------------------------------------------------------------------------------------------------------------------------------------------------------------|---------------------------------------------------------------------------------------------------------------------------------------------------------------------------------------------------------------------------------------------------------------------------------------------------------------------------------------------------------------------------------------------------------------------------------------------------------------------------------------------------------------------|-----|------|------|------|------|----------|------|----------|
| ull_length_coverage=0;isoform_length=2168;expected_accuracy=0.997<br>cb16136_c0/f2p0/1338<br>isoform=cb16136_c0;full_length_coverage=2;non_full_length_coverage=0;isoform_length=1338;expected_accuracy=0.993<br>cb11915_c17/f1p1/1371<br>isoform=cb11915_c17;full_length_coverage=1;non_full_length_coverage=1;isoform_length=1371;expected_accuracy=0.993<br>cb4834_c32/f1p0/2446<br>isoform=cb4834_c32;full_length_coverage=1;non_full_length_coverage=0;isoform_length=2446;expected_accuracy=0.991<br>cb8564_c39136/f1p0/3036<br>isoform=cb8564_c39136;full_length_coverage=1;non_full_length_coverage=0;isoform_length=3036;expected_accuracy=0.998<br>cb13565_c28/f1p4/1411<br>isoform=cb13565_c28;full_length_coverage=1;non_full_length_coverage=4;isoform_length=1411;expected_accuracy=0.998<br>cb1039_c20/f1p0/3998<br>isoform=cb1039_c20;full_length_coverage=1;non_full_length_coverage=0;isoform_length=3998;expected_accuracy=0.996 | ll_length_coverage=3;isoform_length=2958;expected_accuracy=0.997<br><br>gnl BL_ORD_ID 55829 cb8564_c42176/f1p0/3183<br><br>gnl BL_ORD_ID 53529 cb8564_c127829/f1p1/1946<br><br>gnl BL_ORD_ID 73014 cb4834_c36/f1p0/2620<br><br>gnl BL_ORD_ID 55522 cb8564_c44123/f1p1/3230<br><br>gnl BL_ORD_ID 62572 cb13565_c52/f1p3/1664<br><br>gnl BL_ORD_ID 1556                      cb1039_c41/f1p0/4155<br>isoform=cb1039_c41;full_length_coverage=1;non_full_length_coverage=0;isoform_length=4155;expected_accuracy=0.999 | 436 | 1338 | 50   | 435  | 2194 | 309<br>5 | 4    | 389      |
|                                                                                                                                                                                                                                                                                                                                                                                                                                                                                                                                                                                                                                                                                                                                                                                                                                                                                                                                                     |                                                                                                                                                                                                                                                                                                                                                                                                                                                                                                                     | 442 | 1371 | 9    | 446  | 938  | 186<br>7 | 1    | 439      |
|                                                                                                                                                                                                                                                                                                                                                                                                                                                                                                                                                                                                                                                                                                                                                                                                                                                                                                                                                     |                                                                                                                                                                                                                                                                                                                                                                                                                                                                                                                     | 12  | 1846 | 1842 | 2446 | 3    | 182<br>6 | 1934 | 252<br>7 |
|                                                                                                                                                                                                                                                                                                                                                                                                                                                                                                                                                                                                                                                                                                                                                                                                                                                                                                                                                     |                                                                                                                                                                                                                                                                                                                                                                                                                                                                                                                     | 16  | 2089 | 2085 | 3036 | 15   | 209<br>2 | 2219 | 317<br>1 |
|                                                                                                                                                                                                                                                                                                                                                                                                                                                                                                                                                                                                                                                                                                                                                                                                                                                                                                                                                     |                                                                                                                                                                                                                                                                                                                                                                                                                                                                                                                     | 143 | 1410 | 23   | 147  | 388  | 165<br>5 | 80   | 203      |
|                                                                                                                                                                                                                                                                                                                                                                                                                                                                                                                                                                                                                                                                                                                                                                                                                                                                                                                                                     |                                                                                                                                                                                                                                                                                                                                                                                                                                                                                                                     | 1   | 2587 | 2587 | 3998 | 26   | 262<br>6 | 2732 | 412<br>3 |

|                                                                                                                                                  |                                              |     |      |      |      |      |      |      |      |
|--------------------------------------------------------------------------------------------------------------------------------------------------|----------------------------------------------|-----|------|------|------|------|------|------|------|
| cb6339_c16/f1p1/2286<br>isoform=cb6339_c16;full_length_coverage=1;non_full_length_coverage=1;isoform_length=2286;expected_accuracy=0.997         | gnl BL_ORD_ID 49628 cb6339_c40/f1p2/2606     | 10  | 1780 | 1776 | 2286 | 15   | 1787 | 1991 | 2501 |
| cb8564_c148933/f2p1/2153<br>isoform=cb8564_c1392;full_length_coverage=1;non_full_length_coverage=1;isoform_length=3024;expected_accuracy=0.993   | gnl BL_ORD_ID 12361 cb8564_c1392/f1p1/3024   | 1   | 1541 | 1541 | 2132 | 22   | 1562 | 2433 | 3024 |
| cb8564_c188097/f1p0/2552<br>isoform=cb8564_c188097;full_length_coverage=1;non_full_length_coverage=0;isoform_length=2552;expected_accuracy=0.996 | gnl BL_ORD_ID 55583 cb8564_c45873/f1p2/2968  | 1   | 1945 | 1940 | 2552 | 1    | 1943 | 2046 | 2658 |
| cb8564_c49748/f1p2/2449<br>isoform=cb8564_c146182;full_length_coverage=3;non_full_length_coverage=2;isoform_length=3172;expected_accuracy=1.000  | gnl BL_ORD_ID 11528 cb8564_c146182/f3p2/3172 | 535 | 2415 | 7    | 536  | 1283 | 3163 | 1    | 530  |
| cb8564_c68409/f2p0/2141<br>isoform=cb8564_c68409;full_length_coverage=2;non_full_length_coverage=0;isoform_length=2141;expected_accuracy=0.995   | gnl BL_ORD_ID 16835 cb8564_c73948/f1p0/2329  | 416 | 2110 | 57   | 417  | 634  | 2329 | 2    | 362  |
| cb8564_c110637/f1p2/2491<br>isoform=cb8564_c110637;full_length_coverage=1;non_full_length_coverage=2;isoform_length=2491;expected_accuracy=0.995 | gnl BL_ORD_ID 13896 cb8564_c4136/f2p1/2697   | 13  | 2243 | 2239 | 2455 | 1    | 2246 | 2472 | 2694 |
| cb401_c50/f1p0/2173<br>isoform=cb401_c50;full_length_coverage=1;non_full_length_coverage=1;isoform_length=2173;expected_accuracy=0.995           | gnl BL_ORD_ID 69611 cb401_c144/f1p1/2401     | 96  | 2171 | 1    | 101  | 296  | 2389 | 55   | 155  |

|                                                                                                                      |                                                                                                                      |                          |      |      |      |      |      |      |      |      |
|----------------------------------------------------------------------------------------------------------------------|----------------------------------------------------------------------------------------------------------------------|--------------------------|------|------|------|------|------|------|------|------|
| ngth_coverage=0;isoform_length=2173;expected_accuracy=0.998                                                          |                                                                                                                      |                          |      |      |      |      |      |      |      |      |
| cb8564_c132288/f2p0/3421                                                                                             | gnl BL_ORD_ID 14669                                                                                                  | cb8564_c44765/f1p1/4352  |      |      |      |      |      |      |      |      |
| isoform=cb8564_c132288;full_length_coverage=2;non_full_length_coverage=0;isoform_length=3421;expected_accuracy=0.996 | isoform=cb8564_c44765;full_length_coverage=1;non_full_length_coverage=1;isoform_length=4352;expected_accuracy=0.995  |                          | 1425 | 3421 | 1    | 1427 | 2375 | 4352 | 111  | 1524 |
| cb6646_c1/f3p1/2483                                                                                                  | gnl BL_ORD_ID 3729                                                                                                   | cb6646_c22/f1p1/2606     |      |      |      |      |      |      |      |      |
| isoform=cb6646_c1;full_length_coverage=3;non_full_length_coverage=1;isoform_length=2483;expected_accuracy=1.000      | isoform=cb6646_c22;full_length_coverage=1;non_full_length_coverage=1;isoform_length=2606;expected_accuracy=0.996     |                          | 240  | 2466 | 1    | 241  | 380  | 2606 | 23   | 263  |
| cb391_c5/f1p0/3775                                                                                                   | gnl BL_ORD_ID 41069                                                                                                  | cb391_c0/f1p0/4835       |      |      |      |      |      |      |      |      |
| isoform=cb391_c5;full_length_coverage=1;non_full_length_coverage=0;isoform_length=3775;expected_accuracy=0.994       | isoform=cb391_c0;full_length_coverage=1;non_full_length_coverage=0;isoform_length=4835;expected_accuracy=0.999       |                          | 362  | 3775 | 1    | 365  | 1419 | 4835 | 14   | 378  |
| cb8564_c40598/f1p4/3119                                                                                              | gnl BL_ORD_ID 56275                                                                                                  | cb8564_c73216/f1p0/3006  |      |      |      |      |      |      |      |      |
|                                                                                                                      |                                                                                                                      |                          | 21   | 2732 | 2729 | 3055 | 26   | 2711 | 2832 | 3158 |
| cb3618_c22/f1p0/2903                                                                                                 | gnl BL_ORD_ID 71384                                                                                                  | cb3618_c17/f1p0/3242     |      |      |      |      |      |      |      |      |
|                                                                                                                      |                                                                                                                      |                          | 1    | 2422 | 2422 | 2838 | 21   | 2443 | 2801 | 3217 |
| cb8564_c47011/f1p0/3100                                                                                              | gnl BL_ORD_ID 14411                                                                                                  | cb8564_c44258/f1p0/3202  |      |      |      |      |      |      |      |      |
|                                                                                                                      | isoform=cb8564_c44258;full_length_coverage=1;non_full_length_coverage=0;isoform_length=3202;expected_accuracy=0.993  |                          | 11   | 2306 | 2301 | 2931 | 8    | 2328 | 2572 | 3202 |
| cb8564_c86900/f1p0/3283                                                                                              | gnl BL_ORD_ID 10963                                                                                                  | cb8564_c106917/f6p1/3331 |      |      |      |      |      |      |      |      |
|                                                                                                                      | isoform=cb8564_c106917;full_length_coverage=6;non_full_length_coverage=1;isoform_length=3331;expected_accuracy=1.000 |                          | 211  | 3069 | 2    | 215  | 473  | 3331 | 3    | 214  |

|                                                                                                                                                  |                                                                                                                                                                         |      |      |      |      |      |          |      |          |
|--------------------------------------------------------------------------------------------------------------------------------------------------|-------------------------------------------------------------------------------------------------------------------------------------------------------------------------|------|------|------|------|------|----------|------|----------|
| cb5421_c10/f1p0/1589<br>isoform=cb5421_c10;full_length_coverage=1;non_full_length_coverage=0;isoform_length=1589;expected_accuracy=0.991         | gnl BL_ORD_ID 44652      cb5421_c4/f1p0/1919<br>isoform=cb5421_c4;full_length_coverage=1;non_full_length_coverage=0;isoform_length=1919;expected_accuracy=0.997         | 114  | 1589 | 1    | 115  | 258  | 173<br>6 | 10   | 124      |
| cb5304_c6/f1p0/2203<br>isoform=cb5304_c6;full_length_coverage=1;non_full_length_coverage=0;isoform_length=2203;expected_accuracy=0.997           | gnl BL_ORD_ID 73758      cb5304_c2/f1p0/3141                                                                                                                            | 1    | 1509 | 1508 | 2203 | 363  | 187<br>0 | 2009 | 270<br>6 |
| cb8564_c176603/f2p2/3262<br>isoform=cb8564_c176603;full_length_coverage=2;non_full_length_coverage=2;isoform_length=3262;expected_accuracy=0.997 | gnl BL_ORD_ID 14409      cb8564_c40201/f1p0/3342<br>isoform=cb8564_c40201;full_length_coverage=1;non_full_length_coverage=0;isoform_length=3342;expected_accuracy=0.993 | 144  | 3221 | 1    | 146  | 269  | 334<br>2 | 1    | 147      |
| cb3856_c0/f2p1/1619<br>isoform=cb3856_c0;full_length_coverage=2;non_full_length_coverage=1;isoform_length=1619;expected_accuracy=0.996           | gnl BL_ORD_ID 40758      cb3856_c1/f2p0/1847<br>isoform=cb3856_c1;full_length_coverage=2;non_full_length_coverage=0;isoform_length=1847;expected_accuracy=0.996         | 130  | 1614 | 1    | 131  | 365  | 184<br>7 | 9    | 136      |
| cb416_c28/f1p0/2988<br>isoform=cb416_c28;full_length_coverage=1;non_full_length_coverage=0;isoform_length=2988;expected_accuracy=0.996           | gnl BL_ORD_ID 72151      cb416_c41/f1p0/3183                                                                                                                            | 121  | 2895 | 1    | 116  | 281  | 305<br>4 | 53   | 162      |
| cb4533_c1/f1p0/3594                                                                                                                              | gnl BL_ORD_ID 72649      cb4533_c0/f1p0/3317                                                                                                                            | 1523 | 3175 | 114  | 1523 | 1575 | 324<br>4 | 52   | 146<br>1 |
| cb8564_c90914/f1p0/2521                                                                                                                          | gnl BL_ORD_ID 17948      cb8564_c87252/f1p1/2853<br>isoform=cb8564_c87252;full_length_coverage=1;non_full_length_coverage=1;isoform_length=2853;expected_accuracy=0.993 | 1    | 1396 | 1394 | 2515 | 109  | 150<br>5 | 1726 | 283<br>9 |

|                                                                                                                                                  |                                                                                                                                                                   |     |      |      |      |      |          |      |          |
|--------------------------------------------------------------------------------------------------------------------------------------------------|-------------------------------------------------------------------------------------------------------------------------------------------------------------------|-----|------|------|------|------|----------|------|----------|
| cb17442_c0/f2p0/1363<br>isoform=cb17442_c0;full_length_coverage=2;non_full_length_coverage=0;isoform_length=1363;expected_accuracy=1.000         | gnl BL_ORD_ID 31965      cb17442_c2/f1p1/1710<br>isoform=cb17442_c2;full_length_coverage=1;non_full_length_coverage=1;isoform_length=1710;expected_accuracy=0.991 | 212 | 1363 | 34   | 213  | 356  | 150<br>7 | 2    | 180      |
| cb5772_c10/f1p1/1731                                                                                                                             | gnl BL_ORD_ID 46526      cb5772_c11/f1p1/1685<br>isoform=cb5772_c11;full_length_coverage=1;non_full_length_coverage=1;isoform_length=1685;expected_accuracy=0.992 | 206 | 1613 | 56   | 208  | 256  | 167<br>2 | 1    | 153      |
| cb1729_c18/f1p0/3891                                                                                                                             | gnl BL_ORD_ID 63907      cb1729_c14/f1p1/3905                                                                                                                     | 282 | 3740 | 1    | 282  | 430  | 387<br>9 | 39   | 323      |
| cb8564_c36689/f1p1/2368<br>isoform=cb8564_c36689;full_length_coverage=1;non_full_length_coverage=1;isoform_length=2368;expected_accuracy=0.991   | gnl BL_ORD_ID 56071      cb8564_c54161/f1p4/2912                                                                                                                  | 1   | 1709 | 1706 | 2368 | 2    | 170<br>4 | 2258 | 292<br>1 |
| cb11723_c2/f1p0/1768                                                                                                                             | gnl BL_ORD_ID 60342      cb11723_c1/f1p0/2354                                                                                                                     | 1   | 1321 | 1320 | 1763 | 12   | 132<br>3 | 1557 | 200<br>0 |
| cb14664_c5/f1p0/1279                                                                                                                             | gnl BL_ORD_ID 52959      cb8564_c113186/f1p0/2216                                                                                                                 | 158 | 1277 | 47   | 163  | 946  | 206<br>5 | 105  | 220      |
| cb8564_c116501/f1p0/3896<br>isoform=cb8564_c116501;full_length_coverage=1;non_full_length_coverage=0;isoform_length=3896;expected_accuracy=0.994 | gnl BL_ORD_ID 54548      cb8564_c125967/f1p0/4340                                                                                                                 | 1   | 2762 | 2762 | 3893 | 65   | 282<br>2 | 3205 | 433<br>2 |
| cb1802_c1/f5p0/1943<br>isoform=cb1802_c1;full_length_coverage=5;non_full_length_coverage=0;isoform_length=1943;expected_accuracy=1.000           | gnl BL_ORD_ID 33202      cb1802_c8/f1p0/3646<br>isoform=cb1802_c8;full_length_coverage=1;non_full_length_coverage=0;isoform_length=3646;expected_accuracy=0.998   | 579 | 1943 | 61   | 583  | 2289 | 364<br>6 | 33   | 554      |



|                          |                                                                                                                                                                          |      |      |      |      |      |      |      |      |
|--------------------------|--------------------------------------------------------------------------------------------------------------------------------------------------------------------------|------|------|------|------|------|------|------|------|
| cb8564_c21439/f1p0/2587  | gnl BL_ORD_ID 19279      cb8564_c8088/f4p4/2776<br>isoform=cb8564_c8088;full_length_coverage=4;non_full_length_coverage=4;isoform_length=2776;expected_accuracy=0.998    | 1226 | 2572 | 1    | 1228 | 1380 | 2726 | 32   | 1259 |
| cb6712_c0/f5p1/2302      | gnl BL_ORD_ID 4045      cb6712_c5/f1p0/2789<br>isoform=cb6712_c0;full_length_coverage=5;non_full_length_coverage=1;isoform_length=2302;expected_accuracy=1.000           | 11   | 1499 | 1498 | 2302 | 1    | 1488 | 1966 | 2770 |
| cb1065_c17/f1p0/2210     | gnl BL_ORD_ID 47305      cb1065_c14/f1p0/2462                                                                                                                            | 1024 | 2048 | 10   | 1025 | 1275 | 2300 | 2    | 1012 |
| cb8564_c146690/f2p0/2014 | gnl BL_ORD_ID 9761      cb8564_c114521/f1p0/3515<br>isoform=cb8564_c146690;full_length_coverage=2;non_full_length_coverage=0;isoform_length=2014;expected_accuracy=0.997 | 449  | 2014 | 54   | 453  | 1948 | 3513 | 78   | 477  |
| cb8564_c148479/f1p0/3197 | gnl BL_ORD_ID 52768      cb8564_c13351/f1p2/4615<br>isoform=cb8564_c148479;full_length_coverage=1;non_full_length_coverage=0;isoform_length=3197;expected_accuracy=0.997 | 1    | 2459 | 2455 | 3182 | 587  | 3047 | 3910 | 4637 |
| cb7639_c0/f3p0/2226      | gnl BL_ORD_ID 51427      cb7639_c11/f1p0/2532<br>isoform=cb7639_c0;full_length_coverage=3;non_full_length_coverage=0;isoform_length=2226;expected_accuracy=0.997         | 1    | 1800 | 1799 | 2226 | 2    | 1801 | 2081 | 2507 |
| cb5847_c5/f1p0/2404      | gnl BL_ORD_ID 45644      cb5847_c3/f1p0/2997<br>isoform=cb5847_c5;full_length_coverage=1;non_full_length_coverage=0;isoform_length=2404;expected_accuracy=1.000          | 1    | 1502 | 1501 | 2397 | 155  | 1653 | 2106 | 2997 |

|                                                                                                                                                  |                                                                                                                                                                    |     |      |      |      |      |          |      |          |
|--------------------------------------------------------------------------------------------------------------------------------------------------|--------------------------------------------------------------------------------------------------------------------------------------------------------------------|-----|------|------|------|------|----------|------|----------|
| cb500_c75/f1p0/2105                                                                                                                              | gnl BL_ORD_ID 70942 cb500_c16/f1p0/3627                                                                                                                            | 105 | 1613 | 1    | 105  | 2137 | 364<br>5 | 1865 | 196<br>9 |
| cb8564_c68992/f1p5/3235<br>isoform=cb8564_c68992;full_length_coverage=1;non_full_length_coverage=5;isoform_length=3235;expected_accuracy=0.995   | gnl BL_ORD_ID 13377 cb8564_c22091/f2p0/3351<br>isoform=cb8564_c22091;full_length_coverage=2;non_full_length_coverage=0;isoform_length=3351;expected_accuracy=0.997 | 1   | 1687 | 1684 | 3234 | 2    | 168<br>2 | 1805 | 335<br>1 |
| cb13081_c9/f1p0/1335                                                                                                                             | gnl BL_ORD_ID 10154 cb8564_c11196/f5p0/2303<br>isoform=cb8564_c11196;full_length_coverage=5;non_full_length_coverage=0;isoform_length=2303;expected_accuracy=1.000 | 494 | 1279 | 8    | 496  | 1433 | 221<br>7 | 4    | 492      |
| cb8564_c150144/f1p7/2784<br>isoform=cb8564_c150144;full_length_coverage=1;non_full_length_coverage=7;isoform_length=2784;expected_accuracy=0.991 | gnl BL_ORD_ID 17429 cb8564_c85447/f1p0/3196<br>isoform=cb8564_c85447;full_length_coverage=1;non_full_length_coverage=0;isoform_length=3196;expected_accuracy=0.997 | 2   | 2419 | 2418 | 2784 | 3    | 241<br>3 | 2660 | 302<br>0 |
| cb8564_c34238/f4p1/4317<br>isoform=cb8564_c34238;full_length_coverage=4;non_full_length_coverage=1;isoform_length=4317;expected_accuracy=1.000   | gnl BL_ORD_ID 55207 cb8564_c35399/f1p0/4553                                                                                                                        | 285 | 4299 | 11   | 289  | 396  | 4411     | 11   | 291      |
| cb2854_c50/f1p0/1716                                                                                                                             | gnl BL_ORD_ID 36931 cb2854_c26/f1p0/2391<br>isoform=cb2854_c26;full_length_coverage=1;non_full_length_coverage=0;isoform_length=2391;expected_accuracy=0.997       | 10  | 1388 | 1386 | 1699 | 85   | 146<br>3 | 2079 | 239<br>1 |
| cb285_c15/f1p1/2293<br>isoform=cb285_c15;full_length_coverage=1;non_full_length_coverage=1;isoform_length=2293;expected_accuracy=0.998           | gnl BL_ORD_ID 38370 cb285_c4/f1p0/2341<br>isoform=cb285_c4;full_length_coverage=1;non_full_length_coverage=0;isoform_length=2341;expected_accuracy=0.993           | 336 | 2284 | 76   | 337  | 399  | 234<br>1 | 1    | 262      |

|                                                                                                                                                |                                                                                                                                                                          |      |      |      |      |      |      |      |      |
|------------------------------------------------------------------------------------------------------------------------------------------------|--------------------------------------------------------------------------------------------------------------------------------------------------------------------------|------|------|------|------|------|------|------|------|
| cb8564_c49194/f2p2/3207<br>isoform=cb8564_c49194;full_length_coverage=2;non_full_length_coverage=2;isoform_length=3207;expected_accuracy=0.996 | gnl BL_ORD_ID 9472      cb8564_c107869/f7p3/3550<br>isoform=cb8564_c107869;full_length_coverage=7;non_full_length_coverage=3;isoform_length=3550;expected_accuracy=1.000 | 218  | 3207 | 1    | 221  | 552  | 3548 | 91   | 309  |
| cb3290_c38/f1p0/2345<br>isoform=cb3290_c38;full_length_coverage=1;non_full_length_coverage=0;isoform_length=2345;expected_accuracy=0.996       | gnl BL_ORD_ID 70294      cb3290_c164/f1p0/3025                                                                                                                           | 1150 | 2345 | 1    | 1151 | 1592 | 2794 | 281  | 1435 |
| cb6794_c24/f1p0/2733                                                                                                                           | gnl BL_ORD_ID 50069      cb6794_c18/f1p1/2705                                                                                                                            | 1    | 1329 | 1327 | 2484 | 60   | 1390 | 1504 | 2661 |
| cb3687_c38/f1p0/3245                                                                                                                           | gnl BL_ORD_ID 41006      cb3687_c7/f2p0/3068<br>isoform=cb3687_c7;full_length_coverage=2;non_full_length_coverage=0;isoform_length=3068;expected_accuracy=0.997          | 1    | 2031 | 2030 | 2917 | 1    | 2031 | 2181 | 3068 |
| cb8564_c85535/f1p0/4529<br>isoform=cb8564_c85535;full_length_coverage=1;non_full_length_coverage=0;isoform_length=4529;expected_accuracy=0.997 | gnl BL_ORD_ID 64237      cb14704_c11/f1p0/5388                                                                                                                           | 1769 | 4526 | 1    | 1769 | 2569 | 5328 | 610  | 2378 |
| cb313_c8/f1p0/2415<br>isoform=cb313_c8;full_length_coverage=1;non_full_length_coverage=0;isoform_length=2415;expected_accuracy=1.000           | gnl BL_ORD_ID 36627      cb313_c24/f1p0/3081<br>isoform=cb313_c24;full_length_coverage=1;non_full_length_coverage=0;isoform_length=3081;expected_accuracy=0.995          | 1    | 2171 | 2171 | 2415 | 82   | 2255 | 2820 | 3064 |
| cb8995_c8/f1p0/2000<br>isoform=cb8995_c8;full_length_coverage=1;non_full_length_coverage=0;isoform_length=2000;expected_accuracy=1.000         | gnl BL_ORD_ID 19528      cb8995_c4/f1p0/2502<br>isoform=cb8995_c4;full_length_coverage=1;non_full_length_coverage=0;isoform_length=2502;expected_accuracy=0.996          | 97   | 2000 | 1    | 100  | 277  | 2180 | 65   | 164  |

|                                                                                                                                                |                                                                                                                                                                         |      |      |      |      |      |          |      |          |
|------------------------------------------------------------------------------------------------------------------------------------------------|-------------------------------------------------------------------------------------------------------------------------------------------------------------------------|------|------|------|------|------|----------|------|----------|
| cb2105_c5/f1p0/2500<br>isoform=cb2105_c5;full_length_coverage=1;non_full_length_coverage=0;isoform_length=2500;expected_accuracy=0.992         | gnl BL_ORD_ID 66723 cb2105_c7/f1p0/2774                                                                                                                                 | 143  | 2460 | 1    | 142  | 327  | 264<br>0 | 26   | 167      |
| cb8564_c77843/f1p0/2830<br>isoform=cb8564_c16916;full_length_coverage=7;non_full_length_coverage=1;isoform_length=3034;expected_accuracy=0.996 | gnl BL_ORD_ID 13115      cb8564_c16916/f7p1/3034                                                                                                                        | 120  | 1764 | 1762 | 2646 | 1    | 164<br>6 | 1853 | 273<br>7 |
| cb8564_c38947/f1p0/2650<br>isoform=cb8564_c38947;full_length_coverage=1;non_full_length_coverage=0;isoform_length=2650;expected_accuracy=0.996 | gnl BL_ORD_ID 16369      cb8564_c52191/f1p0/2822<br>isoform=cb8564_c52191;full_length_coverage=1;non_full_length_coverage=0;isoform_length=2822;expected_accuracy=0.997 | 134  | 1441 | 1436 | 2650 | 84   | 139<br>1 | 1608 | 282<br>2 |
| cb1049_c9/f1p0/2974<br>isoform=cb1049_c9;full_length_coverage=1;non_full_length_coverage=0;isoform_length=2974;expected_accuracy=1.000         | gnl BL_ORD_ID 1364      cb1049_c18/f10p1/3143<br>isoform=cb1049_c18;full_length_coverage=10;non_full_length_coverage=1;isoform_length=3143;expected_accuracy=1.000      | 1345 | 2974 | 1    | 1346 | 1493 | 312<br>2 | 45   | 139<br>0 |
| cb2870_c18/f2p1/2618<br>isoform=cb2870_c18;full_length_coverage=2;non_full_length_coverage=1;isoform_length=2618;expected_accuracy=1.000       | gnl BL_ORD_ID 38086      cb2870_c3/f1p1/3794<br>isoform=cb2870_c3;full_length_coverage=1;non_full_length_coverage=1;isoform_length=3794;expected_accuracy=0.994         | 1    | 1908 | 1904 | 2598 | 2    | 190<br>4 | 3101 | 379<br>4 |
| cb3226_c16/f1p0/2457<br>isoform=cb3226_c16;full_length_coverage=1;non_full_length_coverage=0;isoform_length=2457;expected_accuracy=0.994       | gnl BL_ORD_ID 39676      cb3226_c10/f1p0/3292<br>isoform=cb3226_c10;full_length_coverage=1;non_full_length_coverage=0;isoform_length=3292;expected_accuracy=0.994       | 147  | 2457 | 1    | 147  | 981  | 329<br>2 | 22   | 164      |
| cb6742_c12/f1p0/2398                                                                                                                           | gnl BL_ORD_ID 50018 cb6742_c6/f1p0/3431                                                                                                                                 | 1    | 1343 | 1342 | 2269 | 12   | 135<br>4 | 2079 | 3011     |

|                                                                                                                                                  |                                                                                                                                                                   |      |      |      |      |      |      |      |      |
|--------------------------------------------------------------------------------------------------------------------------------------------------|-------------------------------------------------------------------------------------------------------------------------------------------------------------------|------|------|------|------|------|------|------|------|
| cb2959_c2/f1p0/3487<br>isoform=cb2959_c2;full_length_coverage=1;non_full_length_coverage=0;isoform_length=3487;expected_accuracy=0.995           | gnl BL_ORD_ID 38587      cb2959_c4/f1p0/3532<br>isoform=cb2959_c4;full_length_coverage=1;non_full_length_coverage=0;isoform_length=3532;expected_accuracy=0.994   | 1000 | 3426 | 1    | 1000 | 1138 | 3532 | 6    | 1000 |
| cb8564_c186356/f1p0/2744<br>isoform=cb8564_c186356;full_length_coverage=1;non_full_length_coverage=0;isoform_length=2744;expected_accuracy=0.998 | gnl BL_ORD_ID 55213      cb8564_c35568/f1p0/2997                                                                                                                  | 1    | 1396 | 1393 | 2744 | 13   | 1417 | 1537 | 2886 |
| cb3903_c0/f2p0/2622<br>isoform=cb3903_c0;full_length_coverage=2;non_full_length_coverage=0;isoform_length=2622;expected_accuracy=0.995           | gnl BL_ORD_ID 41371      cb3903_c2/f1p0/3465<br>isoform=cb3903_c2;full_length_coverage=1;non_full_length_coverage=0;isoform_length=3465;expected_accuracy=0.996   | 1    | 2507 | 2507 | 2622 | 882  | 3385 | 3265 | 3380 |
| cb1955_c26/f2p1/2336<br>isoform=cb1955_c26;full_length_coverage=2;non_full_length_coverage=1;isoform_length=2336;expected_accuracy=1.000         | gnl BL_ORD_ID 35587      cb1955_c12/f1p1/2862<br>isoform=cb1955_c12;full_length_coverage=1;non_full_length_coverage=1;isoform_length=2862;expected_accuracy=1.000 | 1117 | 2336 | 1    | 1119 | 1569 | 2788 | 1    | 1120 |
| cb14220_c15/f1p5/6485<br>isoform=cb14220_c15;full_length_coverage=1;non_full_length_coverage=5;isoform_length=6485;expected_accuracy=0.999       | gnl BL_ORD_ID 63134      cb14220_c9/f1p0/6925                                                                                                                     | 2180 | 6426 | 106  | 2182 | 2708 | 6950 | 218  | 2293 |
| cb454_c40/f1p0/2415                                                                                                                              | gnl BL_ORD_ID 42150      cb454_c1/f3p0/2382<br>isoform=cb454_c1;full_length_coverage=3;non_full_length_coverage=0;isoform_length=2382;expected_accuracy=1.000     | 237  | 2293 | 48   | 236  | 296  | 2351 | 1    | 189  |
| cb873_c20/f1p0/2479<br>isoform=cb873_c20;full_length_coverage=1;non_full_length_coverage=0;isoform_length=2479;expected_accuracy=0.999           | gnl BL_ORD_ID 57590      cb873_c16/f1p0/4474                                                                                                                      | 1146 | 2479 | 1    | 1146 | 2949 | 4282 | 17   | 1140 |

|                                                                                                                      |                                                                                                                  |                         |     |      |      |      |      |     |      |     |  |  |
|----------------------------------------------------------------------------------------------------------------------|------------------------------------------------------------------------------------------------------------------|-------------------------|-----|------|------|------|------|-----|------|-----|--|--|
| ngth_coverage=0;isoform_length=2479;expected_accuracy=0.996                                                          |                                                                                                                  |                         |     |      |      |      |      |     |      |     |  |  |
| cb1371_c50/f4p1/3964                                                                                                 | gnl BL_ORD_ID 25357                                                                                              | cb1371_c47/f1p1/5280    |     |      |      |      |      |     |      |     |  |  |
| isoform=cb1371_c50;full_length_coverage=4;non_full_length_coverage=1;isoform_length=3964;expected_accuracy=1.000     | isoform=cb1371_c47;full_length_coverage=1;non_full_length_coverage=1;isoform_length=5280;expected_accuracy=0.998 |                         | 453 | 3964 | 66   | 458  | 1725 | 523 | 1    | 393 |  |  |
| cb2045_c6/f1p0/2314                                                                                                  | gnl BL_ORD_ID 35012                                                                                              | cb2045_c4/f1p0/3368     |     |      |      |      |      |     |      |     |  |  |
| isoform=cb2045_c6;full_length_coverage=1;non_full_length_coverage=0;isoform_length=2314;expected_accuracy=0.993      | isoform=cb2045_c4;full_length_coverage=1;non_full_length_coverage=0;isoform_length=3368;expected_accuracy=0.996  |                         | 1   | 1489 | 1490 | 2278 | 276  | 176 | 2579 | 336 |  |  |
| cb4007_c11/f3p1/2723                                                                                                 |                                                                                                                  |                         |     |      |      |      |      |     |      |     |  |  |
| isoform=cb4007_c11;full_length_coverage=3;non_full_length_coverage=1;isoform_length=2723;expected_accuracy=0.997     | gnl BL_ORD_ID 71719                                                                                              | cb4007_c46/f1p0/3154    | 1   | 1825 | 1824 | 2665 | 3    | 180 | 2145 | 298 |  |  |
| cb5659_c81/f1p0/2132                                                                                                 | gnl BL_ORD_ID 46024                                                                                              | cb5659_c74/f1p3/2885    |     |      |      |      |      |     |      |     |  |  |
| isoform=cb5659_c81;full_length_coverage=1;non_full_length_coverage=0;isoform_length=2132;expected_accuracy=0.999     | isoform=cb5659_c74;full_length_coverage=1;non_full_length_coverage=3;isoform_length=2885;expected_accuracy=0.994 |                         | 1   | 1656 | 1653 | 2132 | 146  | 179 | 2364 | 283 |  |  |
| cb8564_c40598/f1p4/3119                                                                                              | gnl BL_ORD_ID 57028                                                                                              | cb8564_c80926/f1p9/3250 | 1   | 2732 | 2729 | 3051 | 1    | 272 | 2946 | 326 |  |  |
| cb8564_c118011/f1p0/1965                                                                                             | gnl BL_ORD_ID 54973                                                                                              | cb8564_c4062/f1p0/2826  | 1   | 1321 | 1321 | 1964 | 600  | 193 | 2113 | 275 |  |  |
| cb8564_c145598/f4p6/3779                                                                                             |                                                                                                                  |                         |     |      |      |      |      |     |      |     |  |  |
| isoform=cb8564_c145598;full_length_coverage=4;non_full_length_coverage=6;isoform_length=3779;expected_accuracy=1.000 | gnl BL_ORD_ID 48479                                                                                              | cb10398_c17/f1p0/5753   | 20  | 2593 | 2591 | 3771 | 31   | 260 | 4060 | 524 |  |  |

|                                                                                                                                                  |                                                                                                                                                                         |     |      |      |      |      |      |      |      |
|--------------------------------------------------------------------------------------------------------------------------------------------------|-------------------------------------------------------------------------------------------------------------------------------------------------------------------------|-----|------|------|------|------|------|------|------|
| cb8564_c49562/f1p0/2838<br>isoform=cb8564_c49562;full_length_coverage=1;non_full_length_coverage=0;isoform_length=2838;expected_accuracy=0.995   | gnl BL_ORD_ID 16622      cb8564_c50151/f1p0/3198<br>isoform=cb8564_c50151;full_length_coverage=1;non_full_length_coverage=0;isoform_length=3198;expected_accuracy=0.995 | 2   | 2331 | 2327 | 2838 | 3    | 2351 | 2683 | 3198 |
| cb99_c12/f1p0/3017<br>isoform=cb99_c12;full_length_coverage=1;non_full_length_coverage=0;isoform_length=3017;expected_accuracy=0.997             | gnl BL_ORD_ID 68041      cb18819_c2/f1p0/5197                                                                                                                           | 1   | 2118 | 2116 | 2981 | 1833 | 3952 | 4135 | 5003 |
| cb11915_c7/f1p2/1523<br>isoform=cb11915_c7;full_length_coverage=1;non_full_length_coverage=2;isoform_length=1523;expected_accuracy=0.992         | gnl BL_ORD_ID 53626      cb8564_c131696/f1p0/1904                                                                                                                       | 1   | 1133 | 1128 | 1485 | 32   | 1168 | 1523 | 1881 |
| cb7361_c3/f1p0/1750<br>isoform=cb7361_c3;full_length_coverage=1;non_full_length_coverage=0;isoform_length=1750;expected_accuracy=0.995           | gnl BL_ORD_ID 7513      cb7361_c1/f1p0/2638<br>isoform=cb7361_c1;full_length_coverage=1;non_full_length_coverage=0;isoform_length=2638;expected_accuracy=0.998          | 1   | 1156 | 1153 | 1743 | 44   | 1197 | 2010 | 2600 |
| cb8564_c39136/f1p0/3036<br>isoform=cb8564_c39136;full_length_coverage=1;non_full_length_coverage=0;isoform_length=3036;expected_accuracy=0.998   | gnl BL_ORD_ID 55623      cb8564_c47027/f1p0/3544                                                                                                                        | 1   | 2089 | 2085 | 3036 | 1    | 2120 | 2247 | 3200 |
| cb8564_c129967/f2p0/4204<br>isoform=cb8564_c129967;full_length_coverage=2;non_full_length_coverage=0;isoform_length=4204;expected_accuracy=0.997 | gnl BL_ORD_ID 54583      cb8564_c127138/f1p0/4403                                                                                                                       | 1   | 3173 | 3171 | 4076 | 42   | 3214 | 3444 | 4349 |
| cb8564_c10716/f1p3/2179                                                                                                                          | gnl BL_ORD_ID 54238      cb8564_c21052/f1p2/3145                                                                                                                        | 262 | 2210 | 76   | 263  | 1109 | 3057 | 244  | 430  |

|                                                                                                                                                  |                                                                                                                                                                                           |     |      |      |      |     |          |      |          |
|--------------------------------------------------------------------------------------------------------------------------------------------------|-------------------------------------------------------------------------------------------------------------------------------------------------------------------------------------------|-----|------|------|------|-----|----------|------|----------|
| cb8564_c178653/f1p0/2779<br>isoform=cb8564_c178653;full_length_coverage=1;non_full_length_coverage=0;isoform_length=2779;expected_accuracy=0.994 | gnl BL_ORD_ID 55280 cb8564_c37198/f1p5/2941                                                                                                                                               | 1   | 2179 | 2175 | 2779 | 1   | 217<br>7 | 2296 | 290<br>0 |
| cb8564_c15653/f1p4/2475                                                                                                                          | gnl BL_ORD_ID 55529 cb8564_c44286/f1p0/2747                                                                                                                                               | 1   | 2293 | 2289 | 2434 | 2   | 230<br>1 | 2520 | 266<br>5 |
| cb1833_c7/f2p4/3738<br>isoform=cb1833_c7;full_length_coverage=2;non_full_length_coverage=4;isoform_length=3738;expected_accuracy=0.997           | gnl BL_ORD_ID 33409                      cb1833_c19/f1p1/3788<br>isoform=cb1833_c19;full_length_coverage=1;non_full_length_coverage=1;isoform_length=3788;expected_accuracy=0.991         | 1   | 2978 | 2976 | 3608 | 1   | 301<br>9 | 3139 | 378<br>8 |
| cb8564_c36635/f1p0/4030<br>isoform=cb8564_c36635;full_length_coverage=1;non_full_length_coverage=0;isoform_length=4030;expected_accuracy=0.998   | gnl BL_ORD_ID 16592                      cb8564_c51035/f2p2/4216<br>isoform=cb8564_c51035;full_length_coverage=2;non_full_length_coverage=2;isoform_length=4216;expected_accuracy=0.999   | 184 | 4026 | 1    | 189  | 318 | 416<br>0 | 1    | 184      |
| cb8564_c34060/f2p0/3214<br>isoform=cb8564_c34060;full_length_coverage=2;non_full_length_coverage=0;isoform_length=3214;expected_accuracy=0.993   | gnl BL_ORD_ID 55195 cb8564_c35170/f1p0/3386                                                                                                                                               | 533 | 3205 | 6    | 530  | 738 | 339<br>9 | 1    | 497      |
| cb8564_c188097/f1p0/2552<br>isoform=cb8564_c188097;full_length_coverage=1;non_full_length_coverage=0;isoform_length=2552;expected_accuracy=0.996 | gnl BL_ORD_ID 13063                      cb8564_c179457/f1p0/2647<br>isoform=cb8564_c179457;full_length_coverage=1;non_full_length_coverage=0;isoform_length=2647;expected_accuracy=1.000 | 1   | 1945 | 1940 | 2552 | 1   | 192<br>4 | 2027 | 263<br>9 |
| cb6448_c7/f1p0/2778<br>isoform=cb6448_c7;full_length_coverage=1;non_full_length_coverage=0;isoform_length=2778;expected_accuracy=0.998           | gnl BL_ORD_ID 4720                      cb6448_c6/f1p0/3003<br>isoform=cb6448_c6;full_length_coverage=1;non_full_length_coverage=0;isoform_length=3003;expected_accuracy=0.995            | 1   | 2477 | 2478 | 2778 | 2   | 247<br>2 | 2630 | 293<br>1 |



|                                                                                                                                                |                                                                                                                                                                         |      |      |      |      |      |      |      |      |
|------------------------------------------------------------------------------------------------------------------------------------------------|-------------------------------------------------------------------------------------------------------------------------------------------------------------------------|------|------|------|------|------|------|------|------|
| cb8564_c78858/f1p0/2927<br>isoform=cb8564_c78858;full_length_coverage=1;non_full_length_coverage=0;isoform_length=2927;expected_accuracy=0.995 | gnl BL_ORD_ID 16364      cb8564_c72362/f4p1/4130<br>isoform=cb8564_c72362;full_length_coverage=4;non_full_length_coverage=1;isoform_length=4130;expected_accuracy=0.998 | 175  | 2927 | 1    | 174  | 1366 | 4125 | 78   | 250  |
| cb567_c15/f1p0/3394                                                                                                                            | gnl BL_ORD_ID 45929      cb567_c8/f1p0/3388<br>isoform=cb567_c8;full_length_coverage=1;non_full_length_coverage=0;isoform_length=3388;expected_accuracy=0.993           | 424  | 3128 | 75   | 426  | 684  | 3388 | 1    | 349  |
| cb8564_c24391/f1p1/2764<br>isoform=cb8564_c24391;full_length_coverage=1;non_full_length_coverage=1;isoform_length=2764;expected_accuracy=1.000 | gnl BL_ORD_ID 13437      cb8564_c22776/f2p8/3226<br>isoform=cb8564_c22776;full_length_coverage=2;non_full_length_coverage=8;isoform_length=3226;expected_accuracy=0.995 | 1    | 1714 | 1713 | 2764 | 7    | 1719 | 1976 | 3028 |
| cb7863_c23/f1p0/2057<br>isoform=cb7863_c23;full_length_coverage=1;non_full_length_coverage=0;isoform_length=2057;expected_accuracy=0.998       | gnl BL_ORD_ID 8931      cb7863_c2/f5p0/2343<br>isoform=cb7863_c2;full_length_coverage=5;non_full_length_coverage=0;isoform_length=2343;expected_accuracy=1.000          | 264  | 2057 | 37   | 268  | 517  | 2310 | 1    | 234  |
| cb466_c12/f1p0/3253<br>isoform=cb466_c12;full_length_coverage=1;non_full_length_coverage=0;isoform_length=3253;expected_accuracy=0.991         | gnl BL_ORD_ID 41725      cb466_c0/f10p1/3978<br>isoform=cb466_c0;full_length_coverage=10;non_full_length_coverage=1;isoform_length=3978;expected_accuracy=1.000         | 1135 | 3251 | 1    | 1133 | 1857 | 3978 | 35   | 1165 |
| cb2279_c20/f1p0/1654                                                                                                                           | gnl BL_ORD_ID 36531      cb2279_c0/f10p3/2834<br>isoform=cb2279_c0;full_length_coverage=10;non_full_length_coverage=3;isoform_length=2834;expected_accuracy=1.000       | 212  | 1439 | 25   | 214  | 1580 | 2808 | 22   | 211  |
| cb3899_c2/f1p0/3245                                                                                                                            | gnl BL_ORD_ID 71621      cb3899_c0/f1p0/3500                                                                                                                            | 1    | 1823 | 1823 | 3262 | 153  | 1975 | 2077 | 3517 |

|                                                                                                                                                  |                                                                                                                                                                         |     |      |      |      |     |      |      |      |
|--------------------------------------------------------------------------------------------------------------------------------------------------|-------------------------------------------------------------------------------------------------------------------------------------------------------------------------|-----|------|------|------|-----|------|------|------|
| cb8564_c43779/f1p0/3021<br>isoform=cb8564_c43779;full_length_coverage=1;non_full_length_coverage=0;isoform_length=3021;expected_accuracy=0.993   | gnl BL_ORD_ID 56764 cb8564_c70795/f1p0/3769                                                                                                                             | 18  | 2344 | 2345 | 3021 | 34  | 2360 | 2516 | 3187 |
| cb8564_c44698/f1p5/2843<br>isoform=cb8564_c44698;full_length_coverage=1;non_full_length_coverage=5;isoform_length=2843;expected_accuracy=0.997   | gnl BL_ORD_ID 55986 cb8564_c51172/f1p0/3367                                                                                                                             | 2   | 2516 | 2511 | 2827 | 7   | 2534 | 2655 | 2973 |
| cb8564_c146072/f3p3/2176<br>isoform=cb8564_c146072;full_length_coverage=3;non_full_length_coverage=3;isoform_length=2176;expected_accuracy=1.000 | gnl BL_ORD_ID 11219      cb8564_c14871/f5p3/2424<br>isoform=cb8564_c14871;full_length_coverage=5;non_full_length_coverage=3;isoform_length=2424;expected_accuracy=0.996 | 217 | 2165 | 1    | 215  | 412 | 2363 | 28   | 238  |
| cb8564_c47522/f1p0/2954                                                                                                                          | gnl BL_ORD_ID 16172      cb8564_c53024/f1p0/3159<br>isoform=cb8564_c53024;full_length_coverage=1;non_full_length_coverage=0;isoform_length=3159;expected_accuracy=0.996 | 1   | 1710 | 1707 | 2849 | 1   | 1699 | 2017 | 3157 |
| cb151_c6/f1p0/4591<br>isoform=cb151_c6;full_length_coverage=1;non_full_length_coverage=0;isoform_length=4591;expected_accuracy=0.991             | gnl BL_ORD_ID 30049      cb151_c3/f1p1/4867<br>isoform=cb151_c3;full_length_coverage=1;non_full_length_coverage=1;isoform_length=4867;expected_accuracy=0.996           | 454 | 4588 | 1    | 457  | 743 | 4867 | 71   | 524  |
| cb11213_c0/f1p0/1532                                                                                                                             | gnl BL_ORD_ID 3138      cb11213_c1/f1p0/2821<br>isoform=cb11213_c1;full_length_coverage=1;non_full_length_coverage=0;isoform_length=2821;expected_accuracy=0.991        | 1   | 1006 | 1005 | 1472 | 1   | 992  | 2308 | 2783 |
| cb6067_c6/f1p0/2318                                                                                                                              | gnl BL_ORD_ID 74858 cb6067_c1/f1p0/2876                                                                                                                                 | 12  | 1201 | 1201 | 2269 | 8   | 1197 | 1759 | 2827 |

|                          |                                                                                                                                                                           |     |      |      |      |      |      |      |      |
|--------------------------|---------------------------------------------------------------------------------------------------------------------------------------------------------------------------|-----|------|------|------|------|------|------|------|
| cb7696_c12/f1p1/1985     | gnl BL_ORD_ID 6383      cb7696_c3/f2p1/2434<br>isoform=cb7696_c3;full_length_coverage=2;non_full_length_coverage=1;isoform_length=2434;expected_accuracy=0.993            | 1   | 1746 | 1744 | 1980 | 2    | 1745 | 2066 | 2304 |
| cb4146_c9/f1p0/1658      | gnl BL_ORD_ID 71832      cb4146_c2/f1p0/3419                                                                                                                              | 109 | 1625 | 1    | 109  | 1658 | 3172 | 1    | 109  |
| cb1333_c101/f1p0/1395    | gnl BL_ORD_ID 27594      cb1333_c48/f1p0/4759<br>isoform=cb1333_c101;full_length_coverage=1;non_full_length_coverage=0;isoform_length=1395;expected_accuracy=0.997        | 149 | 1395 | 27   | 150  | 3436 | 4678 | 31   | 154  |
| cb3903_c0/f2p0/2622      | gnl BL_ORD_ID 71627      cb3903_c1/f1p0/3496<br>isoform=cb3903_c0;full_length_coverage=2;non_full_length_coverage=0;isoform_length=2622;expected_accuracy=0.995           | 1   | 2505 | 2507 | 2621 | 930  | 3433 | 3316 | 3430 |
| cb8564_c49617/f1p0/3794  | gnl BL_ORD_ID 55838      cb8564_c43552/f1p0/3829<br>isoform=cb8564_c49617;full_length_coverage=1;non_full_length_coverage=0;isoform_length=3794;expected_accuracy=0.999   | 124 | 2019 | 2019 | 3794 | 3    | 1898 | 2010 | 3785 |
| cb8564_c110954/f1p1/2392 | gnl BL_ORD_ID 11399      cb8564_c129154/f1p0/2632<br>isoform=cb8564_c110954;full_length_coverage=1;non_full_length_coverage=1;isoform_length=2392;expected_accuracy=0.994 | 21  | 2113 | 2109 | 2392 | 1    | 2116 | 2304 | 2586 |
| cb3061_c27/f4p0/2371     | gnl BL_ORD_ID 69090      cb3061_c19/f1p0/3233<br>isoform=cb3061_c27;full_length_coverage=4;non_full_length_coverage=0;isoform_length=2371;expected_accuracy=0.992         | 121 | 2342 | 1    | 126  | 892  | 3105 | 9    | 133  |

|                                                                                                                                                  |                                                                                                                                                                           |     |      |      |      |      |      |      |      |
|--------------------------------------------------------------------------------------------------------------------------------------------------|---------------------------------------------------------------------------------------------------------------------------------------------------------------------------|-----|------|------|------|------|------|------|------|
| cb415_c43/f1p0/3304<br>isoform=cb415_c43;full_length_coverage=1;non_full_length_coverage=0;isoform_length=3304;expected_accuracy=0.991           | gnl BL_ORD_ID 42970      cb415_c31/f1p1/3757<br>isoform=cb415_c31;full_length_coverage=1;non_full_length_coverage=1;isoform_length=3757;expected_accuracy=0.996           | 18  | 2924 | 2922 | 3304 | 119  | 3010 | 3335 | 3712 |
| cb18456_c4245/f1p0/1080                                                                                                                          | gnl BL_ORD_ID 67565      cb18456_c5612/f1p0/1308                                                                                                                          | 7   | 512  | 508  | 1079 | 2    | 508  | 616  | 1199 |
| cb8564_c3316/f1p0/2304                                                                                                                           | gnl BL_ORD_ID 55651      cb8564_c3310/f1p1/2761                                                                                                                           | 11  | 1156 | 1155 | 2199 | 1    | 1146 | 1749 | 2793 |
| cb8564_c42091/f1p0/3606<br>isoform=cb8564_c42091;full_length_coverage=1;non_full_length_coverage=0;isoform_length=3606;expected_accuracy=0.998   | gnl BL_ORD_ID 9113      cb8564_c107316/f1p3/3897<br>isoform=cb8564_c107316;full_length_coverage=11;non_full_length_coverage=3;isoform_length=3897;expected_accuracy=1.000 | 1   | 2325 | 2324 | 3606 | 40   | 2363 | 2598 | 3884 |
| cb8564_c48661/f1p2/2634<br>isoform=cb8564_c48661;full_length_coverage=1;non_full_length_coverage=2;isoform_length=2634;expected_accuracy=0.998   | gnl BL_ORD_ID 10862      cb8564_c106708/f1p3/2795<br>isoform=cb8564_c106708;full_length_coverage=1;non_full_length_coverage=3;isoform_length=2795;expected_accuracy=0.991 | 396 | 2630 | 5    | 398  | 539  | 2787 | 2    | 429  |
| cb8564_c109275/f5p1/2435<br>isoform=cb8564_c109275;full_length_coverage=5;non_full_length_coverage=1;isoform_length=2435;expected_accuracy=1.000 | gnl BL_ORD_ID 11914      cb8564_c129298/f1p0/3269<br>isoform=cb8564_c129298;full_length_coverage=1;non_full_length_coverage=0;isoform_length=3269;expected_accuracy=0.993 | 537 | 2435 | 89   | 539  | 1372 | 3268 | 1    | 451  |
| cb1956_c11/f1p0/2868<br>isoform=cb1956_c11;full_length_coverage=1;non_full_length_coverage=0;isoform_length=2868;expected_accuracy=0.996         | gnl BL_ORD_ID 66538      cb1956_c12/f1p0/3120                                                                                                                             | 1   | 1889 | 1889 | 2868 | 166  | 2050 | 2152 | 3137 |
| cb8564_c4940/f1p0/2731<br>isoform=cb8564_c4940;full_length_coverage=1;non_full_length_coverage=0;isoform_length=2731;expected_ac                 | gnl BL_ORD_ID 15618      cb8564_c4939/f1p0/3100<br>isoform=cb8564_c4939;full_length_coverage=1;non_full_length_coverage=0;isoform_length=3100;expected_ac                 | 1   | 1756 | 1755 | 2731 | 1    | 1749 | 2104 | 3080 |

|                                                                                                                                                                  |                                                                                                                                                                           |      |      |      |      |      |          |      |          |
|------------------------------------------------------------------------------------------------------------------------------------------------------------------|---------------------------------------------------------------------------------------------------------------------------------------------------------------------------|------|------|------|------|------|----------|------|----------|
| curacy=0.996<br>cb8564_c120549/flp0/2685<br>isoform=cb8564_c120549;full_length_coverage=1;non_full_length_coverage=0;isoform_length=2685;expected_accuracy=0.999 | curacy=0.995<br>gnl BL_ORD_ID 54524 cb8564_c125248/flp0/3365                                                                                                              | 151  | 2685 | 1    | 153  | 559  | 310<br>1 | 35   | 187      |
| cb1333_c101/flp0/1395<br>isoform=cb1333_c101;full_length_coverage=1;non_full_length_coverage=0;isoform_length=1395;expected_accuracy=0.997                       | gnl BL_ORD_ID 61251 cb1333_c76/flp0/3569                                                                                                                                  | 149  | 1395 | 27   | 150  | 2256 | 350<br>0 | 31   | 154      |
| cb8564_c181853/flp0/2119<br>isoform=cb8564_c181853;full_length_coverage=1;non_full_length_coverage=0;isoform_length=2119;expected_accuracy=0.997                 | gnl BL_ORD_ID 14399      cb8564_c39189/flp1/2975<br>isoform=cb8564_c39189;full_length_coverage=1;non_full_length_coverage=1;isoform_length=2975;expected_accuracy=0.992   | 1    | 1339 | 1334 | 2119 | 1    | 135<br>2 | 2181 | 297<br>5 |
| cb5896_c24/flp0/2963<br>isoform=cb5896_c24;full_length_coverage=1;non_full_length_coverage=0;isoform_length=2963;expected_accuracy=0.998                         | gnl BL_ORD_ID 74558 cb5896_c23/flp0/4184                                                                                                                                  | 1    | 1692 | 1693 | 2963 | 1    | 167<br>8 | 2860 | 415<br>5 |
| cb8564_c178226/flp0/2728<br>isoform=cb8564_c178226;full_length_coverage=1;non_full_length_coverage=0;isoform_length=2728;expected_accuracy=0.998                 | gnl BL_ORD_ID 10510      cb8564_c111713/f6p2/3032<br>isoform=cb8564_c111713;full_length_coverage=6;non_full_length_coverage=2;isoform_length=3032;expected_accuracy=0.998 | 1284 | 2728 | 1    | 1288 | 1391 | 283<br>6 | 1    | 128<br>7 |
| cb8564_c36689/flp1/2368<br>isoform=cb8564_c36689;full_length_coverage=1;non_full_length_coverage=1;isoform_length=2368;expected_accuracy=0.991                   | gnl BL_ORD_ID 55574 cb8564_c45699/flp0/3005                                                                                                                               | 1    | 1709 | 1706 | 2368 | 1    | 168<br>3 | 2182 | 284<br>4 |
| cb7786_c15/f7p3/2290                                                                                                                                             | gnl BL_ORD_ID 6654      cb7786_c5/flp1/2527                                                                                                                               | 216  | 2286 | 1    | 215  | 458  | 252      | 1    | 214      |

|                                                                                                                                            |                                                                                                                                                             |     |      |      |      |      |      |      |      |   |
|--------------------------------------------------------------------------------------------------------------------------------------------|-------------------------------------------------------------------------------------------------------------------------------------------------------------|-----|------|------|------|------|------|------|------|---|
| isoform=cb7786_c15;full_length_coverage=7;non_full_length_coverage=3;isoform_length=2290;expected_accuracy=1.000<br>cb4233_c92/f1p1/2467   | isoform=cb7786_c5;full_length_coverage=1;non_full_length_coverage=1;isoform_length=2527;expected_accuracy=0.999                                             |     |      |      |      |      |      |      |      | 7 |
| isoform=cb4233_c92;full_length_coverage=1;non_full_length_coverage=1;isoform_length=2467;expected_accuracy=0.998<br>cb3833_c0/f3p0/1648    | gnl BL_ORD_ID 72375 cb4233_c106/f1p2/3225                                                                                                                   | 1   | 1959 | 1958 | 2467 | 32   | 1986 | 2666 | 3169 |   |
| isoform=cb3833_c0;full_length_coverage=3;non_full_length_coverage=0;isoform_length=1648;expected_accuracy=1.000<br>cb8564_c40598/f1p4/3119 | gnl BL_ORD_ID 40462 cb3833_c2/f1p0/3264<br>isoform=cb3833_c2;full_length_coverage=1;non_full_length_coverage=0;isoform_length=3264;expected_accuracy=0.994  | 327 | 1635 | 4    | 328  | 1956 | 3264 | 1    | 323  |   |
| isoform=cb8564_c40598;full_length_coverage=1;non_full_length_coverage=0;isoform_length=3119;expected_accuracy=0.991<br>cb3270_c5/f1p0/2990 | gnl BL_ORD_ID 55502 cb8564_c43538/f1p0/3563                                                                                                                 | 1   | 2732 | 2729 | 3054 | 2    | 2736 | 2857 | 3181 |   |
| isoform=cb3270_c5;full_length_coverage=1;non_full_length_coverage=0;isoform_length=2990;expected_accuracy=0.991<br>cb6326_c66/f1p0/1099    | gnl BL_ORD_ID 41534 cb3270_c3/f1p0/3673<br>isoform=cb3270_c3;full_length_coverage=1;non_full_length_coverage=0;isoform_length=3673;expected_accuracy=0.997  | 1   | 1626 | 1623 | 2990 | 51   | 1698 | 2302 | 3673 |   |
| isoform=cb6326_c66;full_length_coverage=1;non_full_length_coverage=0;isoform_length=1099;expected_accuracy=0.998<br>cb5137_c53/f1p0/2672   | gnl BL_ORD_ID 5375 cb6326_c63/f1p0/1216<br>isoform=cb6326_c63;full_length_coverage=1;non_full_length_coverage=0;isoform_length=1216;expected_accuracy=0.998 | 216 | 1060 | 7    | 220  | 372  | 1216 | 1    | 214  |   |
| isoform=cb5137_c53;full_length_coverage=1;non_full_length_coverage=0;isoform_length=2672;expected_accuracy=0.992<br>cb1163_c21/f1p5/3705   | gnl BL_ORD_ID 72120 cb5137_c91/f1p0/3100                                                                                                                    | 19  | 2565 | 2562 | 2672 | 20   | 2589 | 2693 | 2802 |   |
|                                                                                                                                            | gnl BL_ORD_ID 23459 cb1163_c11/f2p1/3742                                                                                                                    | 1   | 2507 | 2506 | 3627 | 1    | 250  | 2616 | 374  |   |

|                                                                                                                     |                                                                                                                  |     |      |      |      |      |      |      |     |   |
|---------------------------------------------------------------------------------------------------------------------|------------------------------------------------------------------------------------------------------------------|-----|------|------|------|------|------|------|-----|---|
| isoform=cb1163_c21;full_length_coverage=1;non_full_length_coverage=5;isoform_length=3705;expected_accuracy=0.994    | isoform=cb1163_c11;full_length_coverage=2;non_full_length_coverage=1;isoform_length=3742;expected_accuracy=0.999 |     |      |      |      |      |      | 4    |     | 2 |
| cb14540_c10/f1p0/1846                                                                                               | gnl BL_ORD_ID 57978 cb8564_c85833/f1p0/2942                                                                      | 1   | 1104 | 1102 | 1721 | 607  | 170  | 2309 | 292 | 8 |
| cb18456_c5228/f2p2/1404                                                                                             | gnl BL_ORD_ID 53691 cb8564_c1249/f1p1/2145                                                                       | 439 | 1360 | 9    | 441  | 1219 | 214  | 1    | 430 |   |
| isoform=cb18456_c5228;full_length_coverage=2;non_full_length_coverage=2;isoform_length=1404;expected_accuracy=0.999 |                                                                                                                  |     |      |      |      |      | 0    |      |     |   |
| cb8564_c79905/f1p0/2920                                                                                             | gnl BL_ORD_ID 57797 cb8564_c80971/f1p0/4679                                                                      | 1   | 1731 | 1730 | 2878 | 731  | 246  | 3283 | 443 | 1 |
| cb1130_c5/f1p0/2483                                                                                                 | gnl BL_ORD_ID 22369 cb1130_c6/f1p0/2972                                                                          |     |      |      |      |      |      |      |     |   |
| isoform=cb1130_c5;full_length_coverage=1;non_full_length_coverage=0;isoform_length=2483;expected_accuracy=0.991     | isoform=cb1130_c6;full_length_coverage=1;non_full_length_coverage=0;isoform_length=2972;expected_accuracy=0.996  | 1   | 1809 | 1809 | 2482 | 11   | 180  | 2298 | 297 | 2 |
| cb8564_c41115/f1p3/2751                                                                                             | gnl BL_ORD_ID 55481 cb8564_c42759/f1p1/2974                                                                      | 10  | 1542 | 1539 | 2690 | 33   | 156  | 1736 | 288 | 4 |
| cb6473_c12/f1p0/1867                                                                                                | gnl BL_ORD_ID 3723 cb6473_c7/f1p0/1970                                                                           |     |      |      |      |      |      |      |     |   |
| isoform=cb6473_c12;full_length_coverage=1;non_full_length_coverage=0;isoform_length=1867;expected_accuracy=0.991    | isoform=cb6473_c7;full_length_coverage=1;non_full_length_coverage=0;isoform_length=1970;expected_accuracy=1.000  | 1   | 1131 | 1126 | 1865 | 1    | 1110 | 1231 | 197 | 0 |
| cb4016_c34/f1p0/2560                                                                                                | gnl BL_ORD_ID 40897 cb4016_c17/f1p0/2709                                                                         |     |      |      |      |      |      |      |     |   |
| isoform=cb4016_c34;full_length_coverage=1;non_full_length_coverage=0;isoform_length=2560;expected_accuracy=0.998    | isoform=cb4016_c17;full_length_coverage=1;non_full_length_coverage=0;isoform_length=2709;expected_accuracy=0.995 | 194 | 2559 | 12   | 195  | 351  | 270  | 2    | 187 | 9 |
| cb2834_c14/f1p0/3411                                                                                                | gnl BL_ORD_ID 70018 cb2834_c15/f1p0/3611                                                                         | 263 | 3407 | 1    | 263  | 373  | 351  | 16   | 270 |   |





|                                                                                                                                                |                                                                                                                                                                                   |     |      |      |      |      |          |      |          |  |
|------------------------------------------------------------------------------------------------------------------------------------------------|-----------------------------------------------------------------------------------------------------------------------------------------------------------------------------------|-----|------|------|------|------|----------|------|----------|--|
|                                                                                                                                                |                                                                                                                                                                                   |     |      |      |      |      |          | 9    |          |  |
| cb3307_c44/f1p0/1073<br>isoform=cb3307_c44;full_length_coverage=1;non_full_length_coverage=0;isoform_length=1073;expected_accuracy=0.999       | gnl BL_ORD_ID 70305 cb3307_c25/f1p0/2537                                                                                                                                          | 157 | 1073 | 4    | 161  | 1416 | 232<br>4 | 5    | 161      |  |
| cb8564_c71766/f1p0/2194<br>isoform=cb8564_c71766;full_length_coverage=1;non_full_length_coverage=0;isoform_length=2194;expected_accuracy=0.996 | gnl BL_ORD_ID 56470 cb8564_c77506/f1p0/3897                                                                                                                                       | 296 | 2194 | 8    | 300  | 2024 | 390<br>5 | 1    | 293      |  |
| cb5962_c9/f1p2/2694<br>isoform=cb5962_c9;full_length_coverage=1;non_full_length_coverage=2;isoform_length=2694;expected_accuracy=0.998         | gnl BL_ORD_ID 46987                      cb5962_c20/f1p3/2774<br>isoform=cb5962_c20;full_length_coverage=1;non_full_length_coverage=3;isoform_length=2774;expected_accuracy=0.993 | 1   | 1390 | 1386 | 2597 | 21   | 141<br>9 | 1552 | 277<br>4 |  |
| cb1333_c101/f1p0/1395<br>isoform=cb1333_c101;full_length_coverage=1;non_full_length_coverage=0;isoform_length=1395;expected_accuracy=0.997     | gnl BL_ORD_ID 61248 cb1333_c59/f1p0/2058                                                                                                                                          | 149 | 1395 | 27   | 148  | 742  | 198<br>6 | 31   | 152      |  |
| cb8564_c37149/f1p9/3212<br>isoform=cb8564_c37149;full_length_coverage=1;non_full_length_coverage=9;isoform_length=3212;expected_accuracy=0.991 | gnl BL_ORD_ID 55939 cb8564_c49630/f1p4/3487                                                                                                                                       | 114 | 2957 | 2957 | 3205 | 71   | 291<br>3 | 3243 | 349<br>3 |  |
| cb8564_c51244/f1p0/2997                                                                                                                        | gnl BL_ORD_ID 56025 cb8564_c52735/f1p0/3300                                                                                                                                       | 1   | 2365 | 2366 | 2949 | 17   | 238<br>3 | 2700 | 328<br>3 |  |
| cb6048_c11/f1p0/2383                                                                                                                           | gnl BL_ORD_ID 45391                      cb6048_c16/f3p0/2541<br>isoform=cb6048_c16;full_length_coverage=3;non_full_length_coverage=0;isoform_length=2541;expected_accuracy=0.993 | 1   | 1762 | 1759 | 2370 | 64   | 182<br>6 | 1930 | 254<br>1 |  |

|                          |                                                                                                                                                                                      |                                                  |      |      |      |      |          |          |          |          |
|--------------------------|--------------------------------------------------------------------------------------------------------------------------------------------------------------------------------------|--------------------------------------------------|------|------|------|------|----------|----------|----------|----------|
| cb8564_c49540/f1p2/2982  | acy=1.000<br>gnl BL_ORD_ID 15490      cb8564_c54085/f3p6/3186<br>isoform=cb8564_c54085;full_length_coverage=3;non_full_length_coverage=6;isoform_length=3186;expected_accuracy=0.996 | 750                                              | 2982 | 81   | 747  | 850  | 308<br>2 | 1        | 667      |          |
| cb7189_c8/f1p0/2376      | gnl BL_ORD_ID 6238      cb7189_c5/f1p1/2266<br>isoform=cb7189_c5;full_length_coverage=1;non_full_length_coverage=1;isoform_length=2266;expected_accuracy=1.000                       | 1                                                | 1304 | 1304 | 2063 | 219  | 152<br>2 | 1417     | 217<br>6 |          |
| cb8564_c146250/f5p1/2250 | isoform=cb8564_c146250;full_length_coverage=5;non_full_length_coverage=1;isoform_length=2250;expected_accuracy=1.000                                                                 | gnl BL_ORD_ID 58095      cb8564_c88673/f1p0/3095 | 1    | 1476 | 1474 | 2181 | 40       | 151<br>8 | 2317     | 302<br>5 |
| cb965_c21/f1p0/3360      | gnl BL_ORD_ID 20094      cb965_c9/f2p4/4285<br>isoform=cb965_c9;full_length_coverage=2;non_full_length_coverage=4;isoform_length=4285;expected_accuracy=0.999                        | 1170                                             | 3298 | 1    | 1171 | 2094 | 422<br>1 | 809      | 197<br>9 |          |
| cb6914_c21/f1p1/2085     | gnl BL_ORD_ID 6059      cb6914_c11/f1p1/2301<br>isoform=cb6914_c21;full_length_coverage=1;non_full_length_coverage=1;isoform_length=2085;expected_accuracy=1.000                     | 179                                              | 2044 | 1    | 179  | 439  | 230<br>1 | 54       | 235      |          |
| cb8564_c75076/f1p0/3860  | gnl BL_ORD_ID 12872      cb8564_c155955/f4p6/4104<br>isoform=cb8564_c75076;full_length_coverage=1;non_full_length_coverage=0;isoform_length=3860;expected_accuracy=0.996             | 1611                                             | 3860 | 1    | 1616 | 1832 | 408<br>1 | 30       | 164<br>8 |          |
| cb8564_c45596/f1p1/3430  | gnl BL_ORD_ID 15046      cb8564_c38440/f1p1/3618                                                                                                                                     | 2                                                | 2780 | 2775 | 3379 | 32   | 284      | 2961     | 356      |          |

|                                                                                                                      |                                                                                                                      |      |      |      |      |      |      |      |  |      |
|----------------------------------------------------------------------------------------------------------------------|----------------------------------------------------------------------------------------------------------------------|------|------|------|------|------|------|------|--|------|
|                                                                                                                      | isoform=cb8564_c38440;full_length_coverage=1;non_full_length_coverage=1;isoform_length=3618;expected_accuracy=0.993  |      |      |      |      |      |      | 1    |  | 8    |
| cb3290_c38/f1p0/2345                                                                                                 |                                                                                                                      |      |      |      |      |      |      |      |  |      |
| isoform=cb3290_c38;full_length_coverage=1;non_full_length_coverage=0;isoform_length=2345;expected_accuracy=0.996     | gnl BL_ORD_ID 70292 cb3290_c108/f1p0/3138                                                                            | 1150 | 2343 | 1    | 1151 | 1706 | 2906 | 276  |  | 1432 |
| cb1581_c11/f1p3/2463                                                                                                 | gnl BL_ORD_ID 28677 cb1581_c8/f1p0/2559                                                                              |      |      |      |      |      |      |      |  |      |
| isoform=cb1581_c11;full_length_coverage=1;non_full_length_coverage=3;isoform_length=2463;expected_accuracy=0.991     | isoform=cb1581_c8;full_length_coverage=1;non_full_length_coverage=0;isoform_length=2559;expected_accuracy=0.994      | 253  | 2414 | 6    | 252  | 402  | 2559 | 1    |  | 247  |
| cb8564_c84151/f1p0/2425                                                                                              | gnl BL_ORD_ID 15626 cb8564_c74256/f1p0/2961                                                                          |      |      |      |      |      |      |      |  |      |
| isoform=cb8564_c84151;full_length_coverage=1;non_full_length_coverage=0;isoform_length=2425;expected_accuracy=0.992  | isoform=cb8564_c74256;full_length_coverage=1;non_full_length_coverage=0;isoform_length=2961;expected_accuracy=0.995  | 1    | 1725 | 1726 | 2425 | 58   | 1799 | 2205 |  | 2909 |
| cb14882_c0/f1p0/1874                                                                                                 | gnl BL_ORD_ID 12384 cb8564_c123657/f1p0/1999                                                                         |      |      |      |      |      |      |      |  |      |
| isoform=cb14882_c0;full_length_coverage=1;non_full_length_coverage=0;isoform_length=1874;expected_accuracy=1.000     | isoform=cb8564_c123657;full_length_coverage=1;non_full_length_coverage=0;isoform_length=1999;expected_accuracy=0.996 | 1    | 1686 | 1685 | 1857 | 1    | 1688 | 1826 |  | 1999 |
| cb8564_c117596/f1p0/1989                                                                                             |                                                                                                                      |      |      |      |      |      |      |      |  |      |
| isoform=cb8564_c117596;full_length_coverage=1;non_full_length_coverage=0;isoform_length=1989;expected_accuracy=0.999 | gnl BL_ORD_ID 55034 cb8564_c4546/f2p0/2151                                                                           | 1    | 1622 | 1620 | 1956 | 10   | 1631 | 1825 |  | 2160 |
| cb8564_c15996/f1p5/3083                                                                                              |                                                                                                                      |      |      |      |      |      |      |      |  |      |
| isoform=cb8564_c15996;full_length_coverage=1;non_full_length_coverage=5;isoform_length=3083;expected_                | gnl BL_ORD_ID 56172 cb8564_c71449/f1p0/3507                                                                          | 323  | 3018 | 4    | 328  | 474  | 3165 | 5    |  | 333  |

|                         |                                                                                                                     |                         |      |      |      |      |      |      |      |      |
|-------------------------|---------------------------------------------------------------------------------------------------------------------|-------------------------|------|------|------|------|------|------|------|------|
| accuracy=0.993          |                                                                                                                     |                         |      |      |      |      |      |      |      |      |
| cb2739_c7/f1p0/3065     | gnl BL_ORD_ID 38775                                                                                                 | cb2739_c0/f2p0/3590     | 1    | 1801 | 1800 | 2872 | 507  | 2298 | 2519 | 3587 |
|                         | isoform=cb2739_c0;full_length_coverage=2;non_full_length_coverage=0;isoform_length=3590;expected_accuracy=0.997     |                         |      |      |      |      |      |      |      |      |
| cb9583_c8/f1p0/1425     | gnl BL_ORD_ID 19511                                                                                                 | cb9583_c6/f1p0/1811     | 527  | 1224 | 7    | 529  | 1115 | 1811 | 9    | 534  |
|                         | isoform=cb9583_c6;full_length_coverage=1;non_full_length_coverage=0;isoform_length=1811;expected_accuracy=0.993     |                         |      |      |      |      |      |      |      |      |
| cb8564_c16240/f1p3/2671 | gnl BL_ORD_ID 52713                                                                                                 | cb8564_c11986/f1p1/3355 | 16   | 2075 | 2072 | 2665 | 17   | 2077 | 2614 | 3208 |
|                         | isoform=cb8564_c16240;full_length_coverage=1;non_full_length_coverage=3;isoform_length=2671;expected_accuracy=0.997 |                         |      |      |      |      |      |      |      |      |
| cb7611_c26/f1p0/2483    | gnl BL_ORD_ID 7566                                                                                                  | cb7611_c18/f1p0/3224    | 288  | 2194 | 48   | 290  | 1325 | 3224 | 1    | 243  |
|                         | isoform=cb7611_c18;full_length_coverage=1;non_full_length_coverage=0;isoform_length=3224;expected_accuracy=1.000    |                         |      |      |      |      |      |      |      |      |
| cb8564_c89331/f1p0/2344 | gnl BL_ORD_ID 17423                                                                                                 | cb8564_c83614/f1p1/3341 | 1    | 2105 | 2101 | 2381 | 117  | 2218 | 3063 | 3341 |
|                         | isoform=cb8564_c83614;full_length_coverage=1;non_full_length_coverage=1;isoform_length=3341;expected_accuracy=0.995 |                         |      |      |      |      |      |      |      |      |
| cb166_c11/f1p0/4188     | gnl BL_ORD_ID 32848                                                                                                 | cb166_c16/f1p0/4452     | 1392 | 4118 | 12   | 1394 | 1646 | 4364 | 85   | 1453 |
|                         | isoform=cb166_c16;full_length_coverage=1;non_full_length_coverage=0;isoform_length=4452;expected_accuracy=0.991     |                         |      |      |      |      |      |      |      |      |
| cb910_c28/f1p1/2974     | gnl BL_ORD_ID 19839                                                                                                 | cb910_c65/f2p1/3148     | 1    | 2158 | 2156 | 2974 | 3    | 216  | 2280 | 310  |

|                                                                                                                                             |                                                                                                                                                                                         |     |      |      |      |      |      |      |     |   |
|---------------------------------------------------------------------------------------------------------------------------------------------|-----------------------------------------------------------------------------------------------------------------------------------------------------------------------------------------|-----|------|------|------|------|------|------|-----|---|
| isoform=cb910_c28;full_length_coverage=1;non_full_length_coverage=1;isoform_length=2974;expected_accuracy=0.995<br>cb5125_c6/f8p4/2105      | isoform=cb910_c65;full_length_coverage=2;non_full_length_coverage=1;isoform_length=3148;expected_accuracy=0.998<br>gnl BL_ORD_ID 43457                      cb5125_c11/f2p1/2545        |     |      |      |      |      |      | 4    |     | 4 |
| isoform=cb5125_c6;full_length_coverage=8;non_full_length_coverage=4;isoform_length=2105;expected_accuracy=1.000<br>cb8564_c51035/f2p2/4216  | isoform=cb5125_c11;full_length_coverage=2;non_full_length_coverage=1;isoform_length=2545;expected_accuracy=1.000                                                                        | 1   | 1297 | 1295 | 2062 | 40   | 133  | 1778 | 254 | 5 |
| isoform=cb8564_c51035;full_length_coverage=2;non_full_length_coverage=2;isoform_length=4216;expected_accuracy=0.999<br>cb7010_c28/f1p0/2721 | gnl BL_ORD_ID 55207   cb8564_c35399/f1p0/4553                                                                                                                                           | 286 | 4160 | 10   | 287  | 405  | 428  | 11   | 287 |   |
| isoform=cb7010_c28;full_length_coverage=1;non_full_length_coverage=0;isoform_length=2721;expected_accuracy=0.997                            | gnl BL_ORD_ID 47804   cb7010_c20/f1p0/4751                                                                                                                                              | 182 | 2721 | 1    | 185  | 2044 | 459  | 1489 | 167 | 3 |
| cb9467_c69/f1p0/2737                                                                                                                        | gnl BL_ORD_ID 20406                      cb9467_c53/f1p0/2583<br>isoform=cb9467_c53;full_length_coverage=1;non_full_length_coverage=0;isoform_length=2583;expected_accuracy=0.996       | 153 | 2026 | 11   | 156  | 696  | 256  | 7    | 147 |   |
| cb5564_c17/f1p0/2403                                                                                                                        | gnl BL_ORD_ID 44673                      cb5564_c2/f3p1/2892<br>isoform=cb5564_c2;full_length_coverage=3;non_full_length_coverage=1;isoform_length=2892;expected_accuracy=0.999         | 262 | 2306 | 5    | 265  | 793  | 284  | 3    | 262 |   |
| cb13842_c0/f1p0/1450                                                                                                                        | gnl BL_ORD_ID 18318                      cb8564_c86426/f1p0/2857<br>isoform=cb8564_c86426;full_length_coverage=1;non_full_length_coverage=0;isoform_length=1450;expected_accuracy=0.997 | 1   | 1120 | 1119 | 1421 | 5    | 1122 | 2491 | 279 | 3 |



|                         |                                                                                                                                                                          |      |      |      |      |      |      |      |      |  |
|-------------------------|--------------------------------------------------------------------------------------------------------------------------------------------------------------------------|------|------|------|------|------|------|------|------|--|
| acy=0.991               | cy=0.993                                                                                                                                                                 |      |      |      |      |      |      |      |      |  |
| cb1438_c12/f1p0/3268    | gnl BL_ORD_ID 29145      cb1438_c10/f1p5/4153<br>isoform=cb1438_c10;full_length_coverage=1;non_full_length_coverage=5;isoform_length=4153;expected_accuracy=0.999        | 1435 | 3193 | 1    | 1439 | 2393 | 4153 | 712  | 2152 |  |
| cb8564_c74180/f1p1/2858 | gnl BL_ORD_ID 56341      cb8564_c74768/f1p0/3399                                                                                                                         | 1    | 2587 | 2585 | 2854 | 190  | 2776 | 2915 | 3184 |  |
| cb9448_c18/f2p0/1769    | gnl BL_ORD_ID 58724      cb9448_c6/f1p1/2077<br>isoform=cb9448_c18;full_length_coverage=2;non_full_length_coverage=0;isoform_length=1769;expected_accuracy=1.000         | 527  | 1769 | 89   | 526  | 772  | 2015 | 1    | 438  |  |
| cb1306_c36/f1p0/2164    | gnl BL_ORD_ID 25329      cb1306_c16/f1p0/3008<br>isoform=cb1306_c36;full_length_coverage=1;non_full_length_coverage=0;isoform_length=2164;expected_accuracy=1.000        | 1    | 1793 | 1788 | 2087 | 29   | 1823 | 2708 | 3008 |  |
| cb8564_c38035/f1p0/2770 | gnl BL_ORD_ID 14399      cb8564_c39189/f1p1/2975<br>isoform=cb8564_c39189;full_length_coverage=1;non_full_length_coverage=1;isoform_length=2975;expected_accuracy=0.992  | 1    | 2035 | 2033 | 2756 | 1    | 2050 | 2242 | 2973 |  |
| cb8564_c87256/f1p0/2285 | gnl BL_ORD_ID 11794      cb8564_c146257/f6p6/2574<br>isoform=cb8564_c87256;full_length_coverage=1;non_full_length_coverage=0;isoform_length=2285;expected_accuracy=0.992 | 1    | 1703 | 1700 | 2285 | 135  | 1839 | 1972 | 2562 |  |
| cb9296_c14/f1p0/1970    | gnl BL_ORD_ID 20303      cb9296_c6/f1p1/1992<br>isoform=cb9296_c6;full_length_coverage=1;non_full_length_coverage=1;isoform_length=1992;expected_accuracy=1.000          | 11   | 1238 | 1239 | 1765 | 13   | 1240 | 1461 | 1992 |  |





|                                                                                                                  |                                                                                                                  |                      |     |      |      |      |      |     |      |     |
|------------------------------------------------------------------------------------------------------------------|------------------------------------------------------------------------------------------------------------------|----------------------|-----|------|------|------|------|-----|------|-----|
| racy=0.996                                                                                                       |                                                                                                                  |                      |     |      |      |      |      |     |      |     |
| cb8313_c6/f1p0/2290                                                                                              | gnl BL_ORD_ID 10395                                                                                              | cb8313_c5/f1p0/2403  |     |      |      |      |      |     |      |     |
| isoform=cb8313_c6;full_length_coverage=1;non_full_length_coverage=0;isoform_length=2290;expected_accuracy=0.996  | isoform=cb8313_c5;full_length_coverage=1;non_full_length_coverage=0;isoform_length=2403;expected_accuracy=0.995  |                      | 2   | 2147 | 2144 | 2285 | 3    | 216 | 2261 | 240 |
|                                                                                                                  |                                                                                                                  |                      |     |      |      |      |      | 1   |      | 3   |
| cb1905_c8/f1p0/2229                                                                                              | gnl BL_ORD_ID 34887                                                                                              | cb1905_c2/f3p0/2454  |     |      |      |      |      |     |      |     |
| isoform=cb1905_c8;full_length_coverage=1;non_full_length_coverage=0;isoform_length=2229;expected_accuracy=0.994  | isoform=cb1905_c2;full_length_coverage=3;non_full_length_coverage=0;isoform_length=2454;expected_accuracy=1.000  |                      | 1   | 1719 | 1719 | 2215 | 6    | 172 | 1957 | 245 |
|                                                                                                                  |                                                                                                                  |                      |     |      |      |      |      | 6   |      | 4   |
| cb6825_c19/f1p0/2295                                                                                             | gnl BL_ORD_ID 4068                                                                                               | cb6825_c37/f3p1/2605 |     |      |      |      |      |     |      |     |
| isoform=cb6825_c19;full_length_coverage=1;non_full_length_coverage=0;isoform_length=2295;expected_accuracy=0.997 | isoform=cb6825_c37;full_length_coverage=3;non_full_length_coverage=1;isoform_length=2605;expected_accuracy=0.995 |                      | 1   | 1494 | 1489 | 2295 | 68   | 156 | 1734 | 254 |
|                                                                                                                  |                                                                                                                  |                      |     |      |      |      |      | 1   |      | 0   |
| cb1821_c5/f2p1/3329                                                                                              | gnl BL_ORD_ID 34014                                                                                              | cb1821_c29/f1p2/4045 |     |      |      |      |      |     |      |     |
| isoform=cb1821_c5;full_length_coverage=2;non_full_length_coverage=1;isoform_length=3329;expected_accuracy=0.999  | isoform=cb1821_c29;full_length_coverage=1;non_full_length_coverage=2;isoform_length=4045;expected_accuracy=0.995 |                      | 297 | 3329 | 1    | 298  | 1012 | 404 | 108  | 404 |
|                                                                                                                  |                                                                                                                  |                      |     |      |      |      |      | 3   |      |     |
| cb2677_c13/f1p1/3727                                                                                             |                                                                                                                  |                      |     |      |      |      |      |     |      |     |
| isoform=cb2677_c13;full_length_coverage=1;non_full_length_coverage=1;isoform_length=3727;expected_accuracy=0.998 | gnl BL_ORD_ID 69883                                                                                              | cb2677_c26/f1p0/4011 | 260 | 3727 | 1    | 262  | 378  | 384 | 4    | 267 |
|                                                                                                                  |                                                                                                                  |                      |     |      |      |      |      | 9   |      |     |
| cb4745_c12/f1p0/2017                                                                                             | gnl BL_ORD_ID 43416                                                                                              | cb4745_c0/f12p0/3046 |     |      |      |      |      |     |      |     |
| isoform=cb4745_c12;full_length_coverage=1;non_full_length_coverage=0;isoform_length=2017;expected_accuracy=0.996 | isoform=cb4745_c0;full_length_coverage=12;non_full_length_coverage=0;isoform_length=3046;expected_accuracy=1.000 |                      | 156 | 2016 | 1    | 161  | 1185 | 304 | 14   | 167 |
|                                                                                                                  |                                                                                                                  |                      |     |      |      |      |      | 6   |      |     |
| cb9467_c64/f1p1/2076                                                                                             | gnl BL_ORD_ID 21843                                                                                              | cb9467_c45/f1p0/2180 | 672 | 2033 | 7    | 673  | 816  | 217 | 5    | 672 |

|                          |                                                                                                                                                                                   |      |      |      |      |      |          |      |          |   |  |  |
|--------------------------|-----------------------------------------------------------------------------------------------------------------------------------------------------------------------------------|------|------|------|------|------|----------|------|----------|---|--|--|
|                          | isoform=cb9467_c45;full_length_coverage=1;non_full_length_coverage=0;isoform_length=2180;expected_accuracy=0.999                                                                  |      |      |      |      |      |          |      |          | 9 |  |  |
| cb1508_c6/f1p1/1904      | gnl BL_ORD_ID 30077                      cb1508_c8/f1p0/1971<br>isoform=cb1508_c8;full_length_coverage=1;non_full_length_coverage=0;isoform_length=1971;expected_accuracy=1.000   | 371  | 1848 | 56   | 372  | 494  | 197<br>1 | 1    | 317      |   |  |  |
| cb2816_c18/f1p0/3156     | gnl BL_ORD_ID 37556                      cb2816_c26/f1p1/3654<br>isoform=cb2816_c26;full_length_coverage=1;non_full_length_coverage=1;isoform_length=3654;expected_accuracy=0.999 | 1    | 1723 | 1721 | 3156 | 78   | 180<br>3 | 2085 | 353<br>6 |   |  |  |
| cb1913_c44/f1p0/2236     | gnl BL_ORD_ID 66492                      cb1913_c51/f1p0/2531<br>isoform=cb1913_c44;full_length_coverage=1;non_full_length_coverage=0;isoform_length=2236;expected_accuracy=0.998 | 1    | 1634 | 1630 | 2220 | 54   | 168<br>7 | 1821 | 2411     |   |  |  |
| cb1279_c85/f1p0/1794     | gnl BL_ORD_ID 27063                      cb1279_c42/f1p0/3192<br>isoform=cb1279_c42;full_length_coverage=1;non_full_length_coverage=0;isoform_length=3192;expected_accuracy=0.993 | 1    | 1120 | 1115 | 1794 | 1    | 1116     | 2529 | 319<br>2 |   |  |  |
| cb2097_c120/f1p0/1809    | gnl BL_ORD_ID 36319                      cb2097_c87/f1p2/2320<br>isoform=cb2097_c87;full_length_coverage=1;non_full_length_coverage=2;isoform_length=2320;expected_accuracy=0.992 | 1    | 1422 | 1420 | 1799 | 393  | 181<br>4 | 1924 | 230<br>4 |   |  |  |
| cb8564_c188095/f1p0/3177 | gnl BL_ORD_ID 15226                      cb8564_c34123/f2p0/3784<br>isoform=cb8564_c34123;full_length_coverage=2;non_full_length_coverage=0;isoform_length=3784;expected_ac       | 1345 | 3158 | 1    | 1346 | 1969 | 378<br>4 | 1    | 135<br>1 |   |  |  |

|                          |                                                                                                                                                                                         |     |      |      |      |      |      |      |      |  |
|--------------------------|-----------------------------------------------------------------------------------------------------------------------------------------------------------------------------------------|-----|------|------|------|------|------|------|------|--|
| _accuracy=0.998          | curacy=1.000                                                                                                                                                                            |     |      |      |      |      |      |      |      |  |
| cb4848_c14/f1p0/1912     | gnl BL_ORD_ID 42205                      cb4848_c5/f1p1/3168<br>isoform=cb4848_c5;full_length_coverage=1;non_full_length_coverage=1;isoform_length=3168;expected_accuracy=0.994         | 1   | 1551 | 1549 | 1846 | 981  | 2530 | 2873 | 3168 |  |
| cb4147_c31/f1p0/6049     | gnl BL_ORD_ID 70796   cb4147_c12/f1p0/6657                                                                                                                                              | 4   | 4516 | 4517 | 5902 | 40   | 4553 | 5192 | 6577 |  |
| cb8564_c12600/f1p0/2645  | gnl BL_ORD_ID 55766   cb8564_c25127/f1p0/3463                                                                                                                                           | 254 | 2645 | 1    | 255  | 370  | 2737 | 17   | 267  |  |
| cb9170_c5/f1p0/1862      | gnl BL_ORD_ID 21012                      cb9170_c4/f1p0/1925<br>isoform=cb9170_c5;full_length_coverage=1;non_full_length_coverage=0;isoform_length=1862;expected_accuracy=1.000         | 246 | 1862 | 74   | 246  | 287  | 1900 | 1    | 173  |  |
| cb18456_c5600/f1p0/1216  | gnl BL_ORD_ID 16844                      cb8564_c68630/f3p3/1964<br>isoform=cb8564_c68630;full_length_coverage=3;non_full_length_coverage=3;isoform_length=1964;expected_accuracy=1.000 | 537 | 1161 | 7    | 536  | 1288 | 1917 | 1    | 528  |  |
| cb8564_c68976/f2p0/3533  | gnl BL_ORD_ID 57694   cb8564_c78332/f1p0/4781<br>isoform=cb8564_c68976;full_length_coverage=2;non_full_length_coverage=0;isoform_length=3533;expected_accuracy=1.000                    | 12  | 2799 | 2797 | 3522 | 12   | 2813 | 3635 | 4361 |  |
| cb8564_c36731/f1p2/2761  | gnl BL_ORD_ID 54425   cb8564_c42906/f1p2/3181                                                                                                                                           | 1   | 1977 | 1972 | 2739 | 1    | 1958 | 2387 | 3155 |  |
| cb8564_c184250/f1p0/2256 | gnl BL_ORD_ID 57213   cb8564_c86813/f1p1/2854<br>isoform=cb8564_c184250;full_length_coverage=1;non_full_length_coverage=0;isoform_length=2256;expected                                  | 1   | 1642 | 1638 | 2256 | 27   | 1668 | 1929 | 2547 |  |

|                                                                                                                     |                                                                                                                     |                          |      |      |      |      |      |      |      |      |
|---------------------------------------------------------------------------------------------------------------------|---------------------------------------------------------------------------------------------------------------------|--------------------------|------|------|------|------|------|------|------|------|
| _accuracy=0.996                                                                                                     |                                                                                                                     |                          |      |      |      |      |      |      |      |      |
| cb8564_c37866/f1p3/2874                                                                                             | gnl BL_ORD_ID 14410                                                                                                 | cb8564_c44256/f1p1/3267  |      |      |      |      |      |      |      |      |
| isoform=cb8564_c37866;full_length_coverage=1;non_full_length_coverage=3;isoform_length=2874;expected_accuracy=0.990 | isoform=cb8564_c44256;full_length_coverage=1;non_full_length_coverage=1;isoform_length=3267;expected_accuracy=0.995 |                          | 1    | 2147 | 2143 | 2863 | 1    | 2119 | 2553 | 3267 |
| cb8564_c21439/f1p0/2587                                                                                             | gnl BL_ORD_ID 54611                                                                                                 | cb8564_c127997/f1p3/2802 | 1226 | 2572 | 1    | 1228 | 1351 | 2697 | 1    | 1230 |
| cb2873_c6/f1p1/3087                                                                                                 | gnl BL_ORD_ID 36904                                                                                                 | cb2873_c2/f2p2/3521      |      |      |      |      |      |      |      |      |
| isoform=cb2873_c6;full_length_coverage=1;non_full_length_coverage=1;isoform_length=3087;expected_accuracy=0.998     | isoform=cb2873_c2;full_length_coverage=2;non_full_length_coverage=2;isoform_length=3521;expected_accuracy=0.998     |                          | 1    | 2226 | 2223 | 3080 | 1    | 2220 | 2644 | 3521 |
| cb8564_c40598/f1p4/3119                                                                                             | gnl BL_ORD_ID 55246                                                                                                 | cb8564_c36343/f1p0/3448  | 2    | 2732 | 2729 | 3051 | 3    | 2745 | 2866 | 3188 |
| cb4641_c2/f2p1/2256                                                                                                 | gnl BL_ORD_ID 42925                                                                                                 | cb4641_c3/f2p1/2387      |      |      |      |      |      |      |      |      |
| isoform=cb4641_c2;full_length_coverage=2;non_full_length_coverage=1;isoform_length=2256;expected_accuracy=0.999     | isoform=cb4641_c3;full_length_coverage=2;non_full_length_coverage=1;isoform_length=2387;expected_accuracy=1.000     |                          | 1032 | 2254 | 1    | 1033 | 1164 | 2387 | 1    | 1032 |
| cb8564_c4687/f1p0/2736                                                                                              | gnl BL_ORD_ID 55049                                                                                                 | cb8564_c4686/f1p0/3506   | 1    | 2436 | 2435 | 2727 | 4    | 2434 | 3239 | 3530 |
| isoform=cb8564_c4687;full_length_coverage=1;non_full_length_coverage=0;isoform_length=2736;expected_accuracy=0.995  |                                                                                                                     |                          |      |      |      |      |      |      |      |      |
| cb8564_c9531/f3p0/2496                                                                                              | gnl BL_ORD_ID 13914                                                                                                 | cb8564_c23779/f1p0/3567  |      |      |      |      |      |      |      |      |
| isoform=cb8564_c9531;full_length_coverage=3;non_full_length_coverage=0;isoform_length=2496;expected_accuracy=0.999  | isoform=cb8564_c23779;full_length_coverage=1;non_full_length_coverage=0;isoform_length=3567;expected_accuracy=0.996 |                          | 15   | 2070 | 2067 | 2492 | 1    | 2054 | 3142 | 3567 |
| cb8564_c53960/f1p0/2993                                                                                             | gnl BL_ORD_ID 15379                                                                                                 | cb8564_c37604/f2p0/3150  | 1    | 1604 | 1602 | 2993 | 1    | 160  | 1744 | 314  |

|                                                                                                                     |                                                                                                                                                                         |      |      |      |      |      |          |      |          |
|---------------------------------------------------------------------------------------------------------------------|-------------------------------------------------------------------------------------------------------------------------------------------------------------------------|------|------|------|------|------|----------|------|----------|
| isoform=cb8564_c53960;full_length_coverage=1;non_full_length_coverage=0;isoform_length=2993;expected_accuracy=0.993 | isoform=cb8564_c37604;full_length_coverage=2;non_full_length_coverage=0;isoform_length=3150;expected_accuracy=0.996                                                     |      |      |      |      |      | 4        |      | 5        |
| cb5659_c78/f1p0/2309                                                                                                | gnl BL_ORD_ID 45301      cb5659_c107/f46p4/2736<br>isoform=cb5659_c107;full_length_coverage=46;non_full_length_coverage=4;isoform_length=2736;expected_accuracy=1.000   | 1    | 1676 | 1675 | 2137 | 7    | 168<br>2 | 2262 | 272<br>7 |
| cb7493_c1/f1p0/2337                                                                                                 | gnl BL_ORD_ID 50550      cb7493_c3/f1p0/2634<br>isoform=cb7493_c1;full_length_coverage=1;non_full_length_coverage=0;isoform_length=2337;expected_accuracy=0.999         | 1    | 1866 | 1864 | 2336 | 1    | 186<br>6 | 2007 | 247<br>9 |
| cb416_c58/f1p0/2505                                                                                                 | gnl BL_ORD_ID 42632      cb416_c28/f1p0/2988<br>isoform=cb416_c28;full_length_coverage=1;non_full_length_coverage=0;isoform_length=2988;expected_accuracy=0.996         | 286  | 2505 | 4    | 287  | 696  | 289<br>6 | 265  | 545      |
| cb10172_c11/f1p0/1434                                                                                               | gnl BL_ORD_ID 433      cb10172_c1/f8p0/1594<br>isoform=cb10172_c1;full_length_coverage=8;non_full_length_coverage=0;isoform_length=1594;expected_accuracy=1.000         | 1    | 1098 | 1098 | 1434 | 21   | 1119     | 1236 | 157<br>2 |
| cb8564_c46622/f2p0/3338                                                                                             | gnl BL_ORD_ID 15520      cb8564_c52723/f2p0/3547<br>isoform=cb8564_c52723;full_length_coverage=2;non_full_length_coverage=0;isoform_length=3547;expected_accuracy=0.990 | 1425 | 3338 | 1    | 1426 | 1556 | 347<br>1 | 1    | 142<br>1 |
| cb18456_c3695/f1p0/1345                                                                                             | gnl BL_ORD_ID 17162      cb8564_c87465/f2p9/3179<br>isoform=cb8564_c87465;full_length_coverage=2;non_full_length_coverage=9;isoform_length=3179;expected_ac             | 1    | 1051 | 1047 | 1341 | 1411 | 246<br>0 | 2635 | 292<br>9 |

|                                                                                                                     |                                             | curacy=1.000 |      |      |      |     |     |      |     |   |  |
|---------------------------------------------------------------------------------------------------------------------|---------------------------------------------|--------------|------|------|------|-----|-----|------|-----|---|--|
| cb862_c22/flp0/3314                                                                                                 |                                             |              |      |      |      |     |     |      |     |   |  |
| isoform=cb862_c22;full_length_coverage=1;non_full_length_coverage=0;isoform_length=3314;expected_accuracy=0.995     | gnl BL_ORD_ID 57576 cb862_c10/flp0/3428     | 182          | 3255 | 1    | 182  | 305 | 338 | 7    | 189 |   |  |
| cb4674_c26/flp1/3006                                                                                                |                                             |              |      |      |      |     |     |      |     |   |  |
| isoform=cb4674_c26;full_length_coverage=1;non_full_length_coverage=1;isoform_length=3006;expected_accuracy=0.995    | gnl BL_ORD_ID 72844 cb4674_c33/flp3/3281    | 1            | 2157 | 2155 | 3006 | 84  | 222 | 2382 | 323 | 5 |  |
| cb1540_c27/flp0/3741                                                                                                |                                             |              |      |      |      |     |     |      |     |   |  |
|                                                                                                                     | gnl BL_ORD_ID 61379 cb1540_c20/flp0/4038    | 304          | 3535 | 1    | 303  | 632 | 386 | 108  | 410 |   |  |
| cb5993_c2/flp0/2414                                                                                                 |                                             |              |      |      |      |     |     |      |     |   |  |
| isoform=cb5993_c1;full_length_coverage=1;non_full_length_coverage=1;isoform_length=2959;expected_accuracy=1.000     | gnl BL_ORD_ID 45179 cb5993_c1/flp1/2959     | 1            | 1289 | 1285 | 2407 | 196 | 148 | 1801 | 292 | 3 |  |
| cb8564_c75977/flp0/2165                                                                                             |                                             |              |      |      |      |     |     |      |     |   |  |
|                                                                                                                     | gnl BL_ORD_ID 57396 cb8564_c91806/flp1/3620 | 1            | 1393 | 1394 | 2125 | 64  | 145 | 2896 | 362 | 2 |  |
| cb4945_c4/flp0/2080                                                                                                 |                                             |              |      |      |      |     |     |      |     |   |  |
| isoform=cb4945_c4;full_length_coverage=1;non_full_length_coverage=0;isoform_length=2080;expected_accuracy=0.996     | gnl BL_ORD_ID 73110 cb4945_c1/flp0/3164     | 1            | 1222 | 1219 | 2047 | 729 | 195 | 2295 | 312 | 3 |  |
| cb8564_c51159/flp0/2634                                                                                             |                                             |              |      |      |      |     |     |      |     |   |  |
| isoform=cb8564_c51159;full_length_coverage=1;non_full_length_coverage=0;isoform_length=2634;expected_accuracy=0.995 | gnl BL_ORD_ID 56353 cb8564_c75114/flp0/2866 | 110          | 2101 | 2098 | 2634 | 1   | 199 | 2197 | 273 | 1 |  |
| cb8564_c123147/flp0/2657                                                                                            |                                             |              |      |      |      |     |     |      |     |   |  |
|                                                                                                                     | gnl BL_ORD_ID 16781 cb8564_c76648/flp0/2870 | 1            | 1859 | 1861 | 2657 | 22  | 188 | 2075 | 287 |   |  |

|                                                                                                                                               |                                                                                                                                                                         |      |      |      |      |      |      |      |      |
|-----------------------------------------------------------------------------------------------------------------------------------------------|-------------------------------------------------------------------------------------------------------------------------------------------------------------------------|------|------|------|------|------|------|------|------|
| isoform=cb8564_c123147;full_length_coverage=1;non_full_length_coverage=0;isoform_length=2657;expected_accuracy=0.997<br>cb8456_c128/f1p1/1805 | isoform=cb8564_c76648;full_length_coverage=1;non_full_length_coverage=0;isoform_length=2870;expected_accuracy=0.999<br>gnl BL_ORD_ID 10827      cb8456_c150/f136p3/2032 |      |      |      |      |      | 8    |      | 0    |
| isoform=cb8456_c128;full_length_coverage=1;non_full_length_coverage=1;isoform_length=1805;expected_accuracy=0.994                             | isoform=cb8456_c150;full_length_coverage=136;non_full_length_coverage=3;isoform_length=2032;expected_accuracy=1.000<br>gnl BL_ORD_ID 42663      cb5098_c9/f1p4/2945     | 1    | 1371 | 1366 | 1805 | 102  | 1457 | 1572 | 2006 |
| cb5098_c14/f1p0/2880                                                                                                                          | isoform=cb5098_c9;full_length_coverage=1;non_full_length_coverage=4;isoform_length=2945;expected_accuracy=0.996<br>gnl BL_ORD_ID 42635      cb416_c25/f1p0/3907         | 1    | 1987 | 1985 | 2698 | 20   | 2009 | 2162 | 2874 |
| cb416_c41/f1p0/3183                                                                                                                           | isoform=cb416_c25;full_length_coverage=1;non_full_length_coverage=0;isoform_length=3907;expected_accuracy=0.996                                                         | 1054 | 3054 | 101  | 1053 | 1912 | 3907 | 1    | 952  |
| cb1648_c14/f1p0/3818                                                                                                                          | isoform=cb1648_c14;full_length_coverage=1;non_full_length_coverage=0;isoform_length=3818;expected_accuracy=0.995<br>gnl BL_ORD_ID 63818      cb1648_c13/f1p0/4230       | 193  | 3818 | 1    | 193  | 339  | 3962 | 8    | 196  |
| cb8564_c19160/f1p2/2687                                                                                                                       | gnl BL_ORD_ID 14058      cb8564_c23936/f1p0/3016                                                                                                                        |      |      |      |      |      |      |      |      |
| isoform=cb8564_c19160;full_length_coverage=1;non_full_length_coverage=2;isoform_length=2687;expected_accuracy=0.990                           | isoform=cb8564_c23936;full_length_coverage=1;non_full_length_coverage=0;isoform_length=3016;expected_accuracy=0.995<br>gnl BL_ORD_ID 40328      cb322_c11/f1p1/4829     | 1    | 1743 | 1741 | 2613 | 4    | 1716 | 2143 | 3016 |
| cb322_c34/f1p0/3998                                                                                                                           | isoform=cb322_c11;full_length_coverage=1;non_full_length_coverage=1;isoform_length=4829;expected_accuracy=0.995                                                         | 1    | 3649 | 3646 | 3960 | 80   | 3736 | 4511 | 4826 |

|                                                                                                                     |                                                                                                                      |     |      |      |      |      |          |      |          |  |
|---------------------------------------------------------------------------------------------------------------------|----------------------------------------------------------------------------------------------------------------------|-----|------|------|------|------|----------|------|----------|--|
| cb8564_c84130/f1p2/3574                                                                                             | cy=0.990<br>gnl BL_ORD_ID 10486      cb8564_c107051/f2p1/3797                                                        |     |      |      |      |      |          |      |          |  |
| isoform=cb8564_c84130;full_length_coverage=1;non_full_length_coverage=2;isoform_length=3574;expected_accuracy=0.995 | isoform=cb8564_c107051;full_length_coverage=2;non_full_length_coverage=1;isoform_length=3797;expected_accuracy=0.997 | 125 | 3511 | 1    | 127  | 392  | 379<br>7 | 84   | 215      |  |
| cb8564_c51172/f1p0/3367                                                                                             | gnl BL_ORD_ID 58199      cb8564_c91279/f1p0/3567                                                                     | 523 | 2973 | 7    | 522  | 749  | 319<br>7 | 8    | 508      |  |
| cb9718_c43/f1p0/1655                                                                                                | gnl BL_ORD_ID 59927      cb9718_c15/f1p3/1797                                                                        | 288 | 1655 | 59   | 290  | 332  | 169<br>9 | 1    | 232      |  |
| isoform=cb9718_c43;full_length_coverage=1;non_full_length_coverage=0;isoform_length=1655;expected_accuracy=0.996    |                                                                                                                      |     |      |      |      |      |          |      |          |  |
| cb8564_c39136/f1p0/3036                                                                                             | gnl BL_ORD_ID 12913      cb8564_c182049/f1p0/3195                                                                    |     |      |      |      |      |          |      |          |  |
| isoform=cb8564_c39136;full_length_coverage=1;non_full_length_coverage=0;isoform_length=3036;expected_accuracy=0.998 | isoform=cb8564_c182049;full_length_coverage=1;non_full_length_coverage=0;isoform_length=3195;expected_accuracy=0.997 | 1   | 2089 | 2085 | 3036 | 1    | 210<br>9 | 2236 | 319<br>5 |  |
| cb2854_c43/f1p0/2083                                                                                                | gnl BL_ORD_ID 36848      cb2854_c42/f1p0/3914                                                                        |     |      |      |      |      |          |      |          |  |
| isoform=cb2854_c43;full_length_coverage=1;non_full_length_coverage=0;isoform_length=2083;expected_accuracy=0.994    | isoform=cb2854_c42;full_length_coverage=1;non_full_length_coverage=0;isoform_length=3914;expected_accuracy=0.999     | 1   | 1705 | 1702 | 2027 | 1186 | 289<br>0 | 3590 | 391<br>4 |  |
| cb8564_c91851/f1p1/2644                                                                                             | gnl BL_ORD_ID 14058      cb8564_c23936/f1p0/3016                                                                     |     |      |      |      |      |          |      |          |  |
| isoform=cb8564_c91851;full_length_coverage=1;non_full_length_coverage=1;isoform_length=2644;expected_accuracy=0.993 | isoform=cb8564_c23936;full_length_coverage=1;non_full_length_coverage=0;isoform_length=3016;expected_accuracy=0.995  | 1   | 1713 | 1711 | 2567 | 4    | 171<br>6 | 2143 | 301<br>6 |  |
| cb7893_c0/f6p1/2246                                                                                                 | gnl BL_ORD_ID 8161      cb7893_c2/f1p1/2510                                                                          |     |      |      |      |      |          |      |          |  |
| isoform=cb7893_c0;full_length_coverage=6;non_full_length_coverage=1;isoform_length=2246;expected_accuracy=0.993     | isoform=cb7893_c2;full_length_coverage=1;non_full_length_coverage=1;isoform_length=2510;expected_accuracy=0.993      | 15  | 1750 | 1745 | 2228 | 2    | 173<br>6 | 2028 | 251<br>0 |  |



|                                                                                                                                                |                                                                                                                                                                    |     |      |      |      |      |          |      |          |  |
|------------------------------------------------------------------------------------------------------------------------------------------------|--------------------------------------------------------------------------------------------------------------------------------------------------------------------|-----|------|------|------|------|----------|------|----------|--|
| acy=1.000                                                                                                                                      | cy=0.993                                                                                                                                                           |     |      |      |      |      |          |      |          |  |
| cb795_c7/f1p0/2330                                                                                                                             | gnl BL_ORD_ID 49474 cb795_c15/f1p0/3020                                                                                                                            | 441 | 2279 | 45   | 442  | 1018 | 285<br>6 | 52   | 450      |  |
| cb8564_c45699/f1p0/3005                                                                                                                        | gnl BL_ORD_ID 14410 cb8564_c44256/f1p1/3267<br>isoform=cb8564_c44256;full_length_coverage=1;non_full_length_coverage=1;isoform_length=3267;expected_accuracy=0.995 | 1   | 2133 | 2129 | 2844 | 1    | 2119     | 2553 | 326<br>7 |  |
| cb2950_c0/f4p0/2843<br>isoform=cb2950_c0;full_length_coverage=4;non_full_length_coverage=0;isoform_length=2843;expected_accuracy=1.000         | gnl BL_ORD_ID 36576 cb2950_c14/f1p0/2872<br>isoform=cb2950_c14;full_length_coverage=1;non_full_length_coverage=0;isoform_length=2872;expected_accuracy=0.999       | 398 | 2843 | 69   | 399  | 430  | 287<br>1 | 1    | 329      |  |
| cb7550_c6/f1p0/1886                                                                                                                            | gnl BL_ORD_ID 50589 cb7550_c4/f1p1/2591                                                                                                                            | 1   | 1051 | 1046 | 1754 | 74   | 1130     | 1729 | 244<br>6 |  |
| cb8564_c90372/f1p0/2157<br>isoform=cb8564_c90372;full_length_coverage=1;non_full_length_coverage=0;isoform_length=2157;expected_accuracy=0.994 | gnl BL_ORD_ID 56779 cb8564_c71242/f1p0/2918                                                                                                                        | 1   | 1092 | 1090 | 2157 | 104  | 1197     | 1466 | 253<br>3 |  |
| cb8564_c34922/f1p0/2696<br>isoform=cb8564_c34922;full_length_coverage=1;non_full_length_coverage=0;isoform_length=2696;expected_accuracy=0.993 | gnl BL_ORD_ID 14531 cb8564_c41778/f1p9/3482<br>isoform=cb8564_c41778;full_length_coverage=1;non_full_length_coverage=9;isoform_length=3482;expected_accuracy=0.992 | 242 | 2696 | 1    | 246  | 812  | 330<br>2 | 1    | 247      |  |
| cb2471_c2/f7p1/2180<br>isoform=cb2471_c2;full_length_coverage=7;non_full_length_coverage=1;isoform_length=2180;expected_accuracy=1.000         | gnl BL_ORD_ID 37270 cb2471_c8/f3p0/2291<br>isoform=cb2471_c8;full_length_coverage=3;non_full_length_coverage=0;isoform_length=2291;expected_accuracy=0.996         | 265 | 2180 | 44   | 268  | 373  | 228<br>8 | 1    | 225      |  |
| cb7184_c2/f3p1/1854                                                                                                                            | gnl BL_ORD_ID 51021 cb7184_c5/f1p1/2648                                                                                                                            | 371 | 1854 | 53   | 376  | 1134 | 262      | 61   | 384      |  |



|                          |                                                                                                                                                                              |     |      |      |      |      |      |      |      |
|--------------------------|------------------------------------------------------------------------------------------------------------------------------------------------------------------------------|-----|------|------|------|------|------|------|------|
| cb5244_c15/f1p3/2886     | acy=1.000<br>gnl BL_ORD_ID 45884      cb5244_c7/f1p0/4048<br>isoform=cb5244_c7;full_length_coverage=1;non_full_length_coverage=0;isoform_length=4048;expected_accuracy=0.997 | 293 | 2892 | 40   | 294  | 1155 | 3759 | 36   | 291  |
| cb8564_c181853/f1p0/2119 | isoform=cb8564_c181853;full_length_coverage=1;non_full_length_coverage=0;isoform_length=2119;expected_accuracy=0.997<br>gnl BL_ORD_ID 54438      cb8564_c46124/f1p0/3383     | 1   | 1339 | 1334 | 2119 | 151  | 1491 | 2319 | 3107 |
| cb8564_c69290/f5p0/2257  | isoform=cb8564_c69290;full_length_coverage=5;non_full_length_coverage=0;isoform_length=2257;expected_accuracy=1.000<br>gnl BL_ORD_ID 11067      cb8564_c111307/f1p0/2509     | 505 | 2254 | 99   | 506  | 760  | 2509 | 1    | 408  |
| cb8564_c148828/f1p1/3417 | isoform=cb8564_c148828;full_length_coverage=1;non_full_length_coverage=1;isoform_length=3417;expected_accuracy=0.993<br>gnl BL_ORD_ID 16525      cb8564_c74618/f1p0/3734     | 1   | 2541 | 2536 | 3417 | 1    | 2536 | 2650 | 3532 |
| cb8564_c70577/f1p0/3111  | gnl BL_ORD_ID 58074      cb8564_c88129/f1p3/3262                                                                                                                             | 1   | 2109 | 2106 | 2866 | 3    | 2110 | 2394 | 3154 |
| cb18456_c6530/f1p0/1200  | gnl BL_ORD_ID 52890      cb8564_c111083/f1p0/1916                                                                                                                            | 260 | 1166 | 3    | 259  | 824  | 1729 | 37   | 293  |
| cb8388_c8/f1p0/1792      | gnl BL_ORD_ID 9888      cb8388_c1/f2p0/2359<br>isoform=cb8388_c1;full_length_coverage=2;non_full_length_coverage=0;isoform_length=2359;expected_accuracy=0.996               | 415 | 1655 | 50   | 418  | 1119 | 2359 | 1    | 369  |
| cb8564_c14882/f1p0/2156  | gnl BL_ORD_ID 12527      cb8564_c15023/f2p0/2552                                                                                                                             | 1   | 1644 | 1645 | 2060 | 30   | 167  | 2137 | 255  |

|                                                                                                                     |                                                                                                                     |      |      |      |      |      |      |      |  |      |
|---------------------------------------------------------------------------------------------------------------------|---------------------------------------------------------------------------------------------------------------------|------|------|------|------|------|------|------|--|------|
|                                                                                                                     | isoform=cb8564_c15023;full_length_coverage=2;non_full_length_coverage=0;isoform_length=2552;expected_accuracy=0.996 |      |      |      |      |      |      | 4    |  | 2    |
| cb9467_c4/f9p0/2081                                                                                                 | gnl BL_ORD_ID 21567      cb9467_c27/f1p0/2294                                                                       |      |      |      |      |      |      |      |  |      |
| isoform=cb9467_c4;full_length_coverage=9;non_full_length_coverage=0;isoform_length=2081;expected_accuracy=0.999     | isoform=cb9467_c27;full_length_coverage=1;non_full_length_coverage=0;isoform_length=2294;expected_accuracy=0.999    | 161  | 2081 | 1    | 162  | 352  | 2259 | 3    |  | 169  |
| cb8564_c82521/f1p0/2413                                                                                             | gnl BL_ORD_ID 12496      cb8564_c14618/f5p1/3581                                                                    |      |      |      |      |      |      |      |  |      |
| isoform=cb8564_c82521;full_length_coverage=1;non_full_length_coverage=0;isoform_length=2413;expected_accuracy=0.999 | isoform=cb8564_c14618;full_length_coverage=5;non_full_length_coverage=1;isoform_length=3581;expected_accuracy=0.997 | 331  | 2413 | 4    | 333  | 1410 | 3494 | 1    |  | 329  |
| cb8564_c70945/f6p3/2821                                                                                             | gnl BL_ORD_ID 57248      cb8564_c88028/f1p1/3776                                                                    |      |      |      |      |      |      |      |  |      |
| isoform=cb8564_c70945;full_length_coverage=6;non_full_length_coverage=3;isoform_length=2821;expected_accuracy=1.000 |                                                                                                                     | 222  | 2774 | 20   | 224  | 1248 | 3800 | 1    |  | 202  |
| cb8564_c20551/f2p0/2429                                                                                             | gnl BL_ORD_ID 16092      cb8564_c72709/f5p1/2784                                                                    |      |      |      |      |      |      |      |  |      |
| isoform=cb8564_c20551;full_length_coverage=2;non_full_length_coverage=0;isoform_length=2429;expected_accuracy=0.999 | isoform=cb8564_c72709;full_length_coverage=5;non_full_length_coverage=1;isoform_length=2784;expected_accuracy=0.997 | 17   | 2235 | 2235 | 2429 | 1    | 2218 | 2507 |  | 2701 |
| cb8564_c45300/f1p4/3014                                                                                             | gnl BL_ORD_ID 55182      cb8564_c34825/f1p2/3200                                                                    |      |      |      |      |      |      |      |  |      |
| isoform=cb8564_c45300;full_length_coverage=1;non_full_length_coverage=4;isoform_length=3014;expected_accuracy=0.996 |                                                                                                                     | 243  | 3014 | 11   | 246  | 394  | 3194 | 6    |  | 237  |
| cb8564_c70365/f1p1/3583                                                                                             | gnl BL_ORD_ID 57853      cb8564_c82558/f1p0/3707                                                                    |      |      |      |      |      |      |      |  |      |
| isoform=cb8564_c70365;full_length_coverage=1;non_full_length_coverage=1;isoform_length=3583;expected_               |                                                                                                                     | 1416 | 3583 | 1    | 1415 | 1557 | 3727 | 7    |  | 1421 |



|                                                                                                                      |                                                                                                                                                                |     |      |      |      |      |      |      |      |  |
|----------------------------------------------------------------------------------------------------------------------|----------------------------------------------------------------------------------------------------------------------------------------------------------------|-----|------|------|------|------|------|------|------|--|
|                                                                                                                      | curacy=0.992                                                                                                                                                   |     |      |      |      |      |      |      |      |  |
| cb8564_c3239/f1p0/1871                                                                                               | gnl BL_ORD_ID 54534 cb8564_c125514/f1p0/2141                                                                                                                   | 221 | 1815 | 32   | 222  | 360  | 1953 | 17   | 204  |  |
| cb8564_c186243/f1p0/2948                                                                                             |                                                                                                                                                                |     |      |      |      |      |      |      |      |  |
| isoform=cb8564_c186243;full_length_coverage=1;non_full_length_coverage=0;isoform_length=2948;expected_accuracy=0.995 | gnl BL_ORD_ID 54377 cb8564_c23287/f1p3/4458                                                                                                                    | 19  | 1986 | 1981 | 2948 | 1106 | 3076 | 3240 | 4208 |  |
| cb5013_c16/f1p0/2722                                                                                                 | gnl BL_ORD_ID 42367 cb5013_c15/f1p0/2652<br>isoform=cb5013_c15;full_length_coverage=1;non_full_length_coverage=0;isoform_length=2652;expected_accuracy=0.999   | 231 | 2524 | 12   | 231  | 380  | 2652 | 1    | 221  |  |
| cb11284_c6/f1p0/1725                                                                                                 |                                                                                                                                                                |     |      |      |      |      |      |      |      |  |
| isoform=cb11284_c6;full_length_coverage=1;non_full_length_coverage=0;isoform_length=1725;expected_accuracy=0.994     | gnl BL_ORD_ID 60127 cb11284_c3/f1p0/2604                                                                                                                       | 1   | 1442 | 1440 | 1725 | 27   | 1468 | 1858 | 2143 |  |
| cb4544_c1/f9p1/2005                                                                                                  |                                                                                                                                                                |     |      |      |      |      |      |      |      |  |
| isoform=cb4544_c1;full_length_coverage=9;non_full_length_coverage=1;isoform_length=2005;expected_accuracy=1.000      | gnl BL_ORD_ID 72660 cb4544_c8/f1p0/2838                                                                                                                        | 521 | 1974 | 9    | 524  | 1149 | 2599 | 7    | 518  |  |
| cb4047_c8/f1p0/2511                                                                                                  | gnl BL_ORD_ID 40224 cb4047_c18/f14p4/2895<br>isoform=cb4047_c18;full_length_coverage=14;non_full_length_coverage=4;isoform_length=2895;expected_accuracy=1.000 | 1   | 1760 | 1756 | 2495 | 31   | 1799 | 1922 | 2661 |  |
| cb1380_c6/f4p1/2530                                                                                                  |                                                                                                                                                                |     |      |      |      |      |      |      |      |  |
| isoform=cb1380_c6;full_length_coverage=4;non_full_length_coverage=1;isoform_length=2530;expected_accuracy=1.000      | gnl BL_ORD_ID 61310 cb1380_c37/f1p0/3199                                                                                                                       | 1   | 1699 | 1698 | 2530 | 7    | 1705 | 2358 | 3190 |  |

|                                                                                                                                                |                                                                                                                                                                               |      |      |      |      |      |          |      |          |
|------------------------------------------------------------------------------------------------------------------------------------------------|-------------------------------------------------------------------------------------------------------------------------------------------------------------------------------|------|------|------|------|------|----------|------|----------|
| acy=1.000                                                                                                                                      |                                                                                                                                                                               |      |      |      |      |      |          |      |          |
| cb6802_c52/f1p0/2612                                                                                                                           | gnl BL_ORD_ID 50085 cb6802_c53/f1p0/3720                                                                                                                                      | 167  | 2577 | 1    | 168  | 1251 | 365<br>9 | 3    | 194      |
| cb8564_c79401/f1p0/4816                                                                                                                        | gnl BL_ORD_ID 35084          cb18812_c7/f1p1/5089<br>isoform=cb18812_c7;full_length_coverage=1;non_full_length_coverage=1;isoform_length=5089;expected_accuracy=0.998         | 1072 | 4398 | 1    | 1068 | 1760 | 508<br>9 | 807  | 187<br>3 |
| cb8564_c23232/f1p3/2540                                                                                                                        | gnl BL_ORD_ID 13063          cb8564_c179457/f1p0/2647<br>isoform=cb8564_c179457;full_length_coverage=1;non_full_length_coverage=0;isoform_length=2647;expected_accuracy=1.000 | 16   | 2172 | 2167 | 2518 | 5    | 214<br>0 | 2242 | 259<br>3 |
| cb2520_c14/f1p1/2870<br>isoform=cb2520_c14;full_length_coverage=1;non_full_length_coverage=1;isoform_length=2870;expected_accuracy=0.996       | gnl BL_ORD_ID 36518          cb2520_c4/f2p0/3911<br>isoform=cb2520_c4;full_length_coverage=2;non_full_length_coverage=0;isoform_length=3911;expected_accuracy=0.999           | 103  | 2840 | 1    | 104  | 1177 | 3911     | 571  | 676      |
| cb4745_c12/f1p0/2017<br>isoform=cb4745_c12;full_length_coverage=1;non_full_length_coverage=0;isoform_length=2017;expected_accuracy=0.996       | gnl BL_ORD_ID 72928 cb4745_c8/f1p0/2875                                                                                                                                       | 156  | 2016 | 15   | 161  | 1049 | 291<br>3 | 11   | 156      |
| cb8564_c20081/f1p0/2720<br>isoform=cb8564_c20081;full_length_coverage=1;non_full_length_coverage=0;isoform_length=2720;expected_accuracy=0.995 | gnl BL_ORD_ID 53927 cb8564_c15139/f1p1/4122                                                                                                                                   | 16   | 1613 | 1609 | 2720 | 225  | 181<br>5 | 2805 | 391<br>6 |
| cb8564_c2600/f1p0/2432<br>isoform=cb8564_c2600;full_length_coverage=1;non_full_length_coverage=0;isoform_length=2432;expected_ac               | gnl BL_ORD_ID 53667 cb8564_c151431/f1p0/2629                                                                                                                                  | 1    | 1400 | 1399 | 2432 | 101  | 149<br>0 | 1607 | 263<br>9 |

|                                                                                                                     |                                                                                                                      |                          |      |      |      |      |      |     |      |     |   |   |
|---------------------------------------------------------------------------------------------------------------------|----------------------------------------------------------------------------------------------------------------------|--------------------------|------|------|------|------|------|-----|------|-----|---|---|
| curacy=1.000                                                                                                        |                                                                                                                      |                          |      |      |      |      |      |     |      |     |   |   |
| cb4576_c161/f5p0/3997                                                                                               | gnl BL_ORD_ID 44415                                                                                                  | cb4576_c54/f1p0/4341     |      |      |      |      |      |     |      |     |   |   |
| isoform=cb4576_c161;full_length_coverage=5;non_full_length_coverage=0;isoform_length=3997;expected_accuracy=1.000   | isoform=cb4576_c54;full_length_coverage=1;non_full_length_coverage=0;isoform_length=4341;expected_accuracy=0.995     |                          | 1841 | 3887 | 1    | 1842 | 2301 | 434 | 10   | 183 | 7 |   |
| cb4482_c1/f1p0/2752                                                                                                 | gnl BL_ORD_ID 44277                                                                                                  | cb4482_c0/f1p0/3335      |      |      |      |      |      |     |      |     |   |   |
| isoform=cb4482_c1;full_length_coverage=1;non_full_length_coverage=0;isoform_length=2752;expected_accuracy=0.997     | isoform=cb4482_c0;full_length_coverage=1;non_full_length_coverage=0;isoform_length=3335;expected_accuracy=0.998      |                          | 638  | 2752 | 90   | 640  | 1214 | 332 | 1    | 550 | 7 |   |
| cb7595_c14/f1p1/2186                                                                                                | gnl BL_ORD_ID 7651                                                                                                   | cb7595_c13/f1p1/2460     |      |      |      |      |      |     |      |     |   |   |
| isoform=cb7595_c14;full_length_coverage=1;non_full_length_coverage=1;isoform_length=2186;expected_accuracy=0.995    | isoform=cb7595_c13;full_length_coverage=1;non_full_length_coverage=1;isoform_length=2460;expected_accuracy=0.994     |                          | 267  | 2185 | 33   | 266  | 540  | 246 | 160  | 398 | 0 |   |
| cb8564_c10682/f1p0/1913                                                                                             | gnl BL_ORD_ID 12478                                                                                                  | cb8564_c152519/f2p1/2103 |      |      |      |      |      |     |      |     |   |   |
| isoform=cb8564_c10682;full_length_coverage=1;non_full_length_coverage=0;isoform_length=1913;expected_accuracy=0.994 | isoform=cb8564_c152519;full_length_coverage=2;non_full_length_coverage=1;isoform_length=2103;expected_accuracy=1.000 |                          | 10   | 1045 | 1041 | 1913 | 1    | 103 | 1208 | 208 | 7 | 1 |
| cb18456_c5009/f1p0/1645                                                                                             | gnl BL_ORD_ID 58142                                                                                                  | cb8564_c89861/f1p27/2678 |      |      |      |      |      |     |      |     |   |   |
| cb1956_c5/f2p0/2813                                                                                                 |                                                                                                                      |                          | 172  | 1379 | 4    | 167  | 1485 | 269 | 1486 | 164 | 3 | 8 |
| isoform=cb1956_c5;full_length_coverage=2;non_full_length_coverage=0;isoform_length=2813;expected_accuracy=0.997     | gnl BL_ORD_ID 66542                                                                                                  | cb1956_c22/f1p0/3042     |      |      |      |      |      |     |      |     |   |   |
| cb8564_c79364/f1p0/2690                                                                                             | gnl BL_ORD_ID 16128                                                                                                  | cb8564_c70982/f4p0/3076  |      |      |      |      |      |     |      |     |   |   |
| isoform=cb8564_c79364;full_length_coverage=1;non_full_length_coverage=0;isoform_length=2690;expected_accuracy=0.997 | isoform=cb8564_c70982;full_length_coverage=4;non_full_length_coverage=0;isoform_length=3076;expected_accuracy=0.997  |                          | 14   | 1450 | 1451 | 2813 | 3    | 143 | 1600 | 296 | 7 | 3 |
| cb8564_c79364/f1p0/2690                                                                                             | gnl BL_ORD_ID 16128                                                                                                  | cb8564_c70982/f4p0/3076  |      |      |      |      |      |     |      |     |   |   |
| isoform=cb8564_c79364;full_length_coverage=1;non_full_length_coverage=0;isoform_length=2690;expected_accuracy=0.997 | isoform=cb8564_c70982;full_length_coverage=4;non_full_length_coverage=0;isoform_length=3076;expected_accuracy=0.997  |                          | 1    | 1379 | 1377 | 2690 | 34   | 140 | 1607 | 292 | 0 | 2 |



|                                                                                                                                                          |                                                                                                                                                                                           |      |      |      |      |      |          |      |          |
|----------------------------------------------------------------------------------------------------------------------------------------------------------|-------------------------------------------------------------------------------------------------------------------------------------------------------------------------------------------|------|------|------|------|------|----------|------|----------|
| accuracy=0.997<br>cb454_c33/f1p0/2337<br>isoform=cb454_c33;full_length_coverage=1;non_full_length_coverage=0;isoform_length=2337;expected_accuracy=0.997 | curacy=0.994<br>gnl BL_ORD_ID 72201 cb454_c19/f1p0/2558                                                                                                                                   | 252  | 2302 | 69   | 251  | 406  | 245<br>3 | 118  | 300      |
| cb9549_c8/f1p0/1542<br>isoform=cb9549_c8;full_length_coverage=1;non_full_length_coverage=0;isoform_length=1542;expected_accuracy=1.000                   | gnl BL_ORD_ID 21592                      cb9549_c6/f1p0/1758<br>isoform=cb9549_c6;full_length_coverage=1;non_full_length_coverage=0;isoform_length=1758;expected_accuracy=0.995           | 114  | 1542 | 1    | 113  | 256  | 168<br>8 | 1    | 113      |
| cb8564_c42506/f1p0/2909                                                                                                                                  | gnl BL_ORD_ID 15334                      cb8564_c36574/f14p7/3838<br>isoform=cb8564_c36574;full_length_coverage=14;non_full_length_coverage=7;isoform_length=3838;expected_accuracy=1.000 | 1    | 2203 | 2199 | 2857 | 1025 | 322<br>7 | 3097 | 375<br>5 |
| cb8564_c112719/f1p0/2721                                                                                                                                 | gnl BL_ORD_ID 36102                      cb18634_c6/f1p0/5260<br>isoform=cb18634_c6;full_length_coverage=1;non_full_length_coverage=0;isoform_length=5260;expected_accuracy=0.998         | 1078 | 2586 | 1    | 1077 | 3709 | 521<br>5 | 2505 | 358<br>2 |
| cb8564_c18821/f1p0/2573<br>isoform=cb8564_c18821;full_length_coverage=1;non_full_length_coverage=0;isoform_length=2573;expected_accuracy=0.996           | gnl BL_ORD_ID 12647                      cb8564_c146156/f5p1/2754<br>isoform=cb8564_c146156;full_length_coverage=5;non_full_length_coverage=1;isoform_length=2754;expected_accuracy=1.000 | 1    | 1625 | 1625 | 2573 | 41   | 166<br>5 | 1803 | 275<br>2 |
| cb8564_c68180/f8p0/3575<br>isoform=cb8564_c68180;full_length_coverage=8;non_full_length_coverage=0;isoform_length=3575;expected_accuracy=1.000           | gnl BL_ORD_ID 18350                      cb8564_c89194/f2p0/4007<br>isoform=cb8564_c89194;full_length_coverage=2;non_full_length_coverage=0;isoform_length=4007;expected_accuracy=0.998   | 1725 | 3492 | 1    | 1729 | 2239 | 400<br>7 | 4    | 172<br>4 |
| cb8564_c79364/f1p0/2690                                                                                                                                  | gnl BL_ORD_ID 10197                      cb8564_c107583/f8p0/3100                                                                                                                         | 1    | 1379 | 1377 | 2690 | 200  | 156      | 1774 | 308      |

|                                                                                                                                                |                                                                                                                                                                                       |     |      |      |      |      |      |      |      |
|------------------------------------------------------------------------------------------------------------------------------------------------|---------------------------------------------------------------------------------------------------------------------------------------------------------------------------------------|-----|------|------|------|------|------|------|------|
| isoform=cb8564_c79364;full_length_coverage=1;non_full_length_coverage=0;isoform_length=2690;expected_accuracy=0.997<br>cb8564_c73244/f1p0/2654 | isoform=cb8564_c107583;full_length_coverage=8;non_full_length_coverage=0;isoform_length=3100;expected_accuracy=1.000<br>gnl BL_ORD_ID 34790                      cb18769_c6/f1p0/7712 |     |      |      |      |      | 8    | 9    |      |
| isoform=cb8564_c73244;full_length_coverage=1;non_full_length_coverage=0;isoform_length=2654;expected_accuracy=0.991<br>cb1915_c3/f7p0/1759     | isoform=cb18769_c6;full_length_coverage=1;non_full_length_coverage=0;isoform_length=7712;expected_accuracy=0.997<br>gnl BL_ORD_ID 36464                      cb1915_c9/f1p0/2392      | 1   | 1341 | 1337 | 2654 | 2948 | 4286 | 6382 | 7696 |
| isoform=cb1915_c3;full_length_coverage=7;non_full_length_coverage=0;isoform_length=1759;expected_accuracy=1.000<br>cb6704_c13/f2p1/1820        | isoform=cb1915_c9;full_length_coverage=1;non_full_length_coverage=0;isoform_length=2392;expected_accuracy=0.998<br>gnl BL_ORD_ID 5106                      cb6704_c3/f1p1/2596        | 496 | 1759 | 63   | 497  | 1078 | 2364 | 2    | 437  |
| isoform=cb6704_c13;full_length_coverage=2;non_full_length_coverage=1;isoform_length=1820;expected_accuracy=1.000<br>cb242_c10/f1p2/2788        | isoform=cb6704_c3;full_length_coverage=1;non_full_length_coverage=1;isoform_length=2596;expected_accuracy=1.000<br>gnl BL_ORD_ID 36521                      cb242_c4/f1p1/4899        | 1   | 1391 | 1387 | 1820 | 1    | 1386 | 2151 | 2584 |
| isoform=cb242_c10;full_length_coverage=1;non_full_length_coverage=2;isoform_length=2788;expected_accuracy=0.995<br>cb18786_c0/f1p0/5838        | isoform=cb242_c4;full_length_coverage=1;non_full_length_coverage=1;isoform_length=4899;expected_accuracy=0.997<br>gnl BL_ORD_ID 31380                      cb17283_c5/f1p1/5374       | 222 | 2784 | 2    | 224  | 2376 | 4886 | 502  | 719  |
| isoform=cb18786_c0;full_length_coverage=1;non_full_length_coverage=1;isoform_length=5374;expected_accuracy=0.998<br>cb11646_c1/f1p0/1708       | isoform=cb17283_c5;full_length_coverage=1;non_full_length_coverage=1;isoform_length=5374;expected_accuracy=0.998<br>gnl BL_ORD_ID 23038                      cb11646_c2/f1p0/1951     | 28  | 4905 | 4902 | 5264 | 1    | 4878 | 5012 | 5374 |
| isoform=cb11646_c1;full_length_coverage=1;non_full_length_coverage=0;isoform_length=1708;expected_accuracy=0.995                               | isoform=cb11646_c2;full_length_coverage=1;non_full_length_coverage=0;isoform_length=1951;expected_accuracy=0.995                                                                      | 1   | 1168 | 1167 | 1708 | 1    | 1166 | 1379 | 1921 |

|                          |                                                                                                                                                                         |      |      |      |      |      |      |      |      |  |
|--------------------------|-------------------------------------------------------------------------------------------------------------------------------------------------------------------------|------|------|------|------|------|------|------|------|--|
| racy=0.996               | acy=0.993                                                                                                                                                               |      |      |      |      |      |      |      |      |  |
| cb8564_c123270/f1p0/1927 | gnl BL_ORD_ID 15055      cb8564_c3236/f1p0/1961<br>isoform=cb8564_c3236;full_length_coverage=1;non_full_length_coverage=0;isoform_length=1961;expected_accuracy=1.000   | 244  | 1812 | 43   | 245  | 377  | 1945 | 6    | 208  |  |
| cb8587_c0/f4p0/1923      | gnl BL_ORD_ID 19180      cb8587_c3/f1p0/2327<br>isoform=cb8587_c0;full_length_coverage=4;non_full_length_coverage=0;isoform_length=1923;expected_accuracy=1.000         | 474  | 1923 | 54   | 474  | 877  | 2326 | 1    | 420  |  |
| cb3570_c13/f1p0/3155     | gnl BL_ORD_ID 39906      cb3570_c7/f1p0/3031<br>isoform=cb3570_c7;full_length_coverage=1;non_full_length_coverage=0;isoform_length=3031;expected_accuracy=0.997         | 269  | 2888 | 16   | 269  | 381  | 2998 | 27   | 279  |  |
| cb8564_c83196/f1p0/2505  | gnl BL_ORD_ID 56909      cb8564_c76562/f1p1/4711<br>isoform=cb8564_c83196;full_length_coverage=1;non_full_length_coverage=0;isoform_length=2505;expected_accuracy=0.995 | 1    | 1642 | 1642 | 2503 | 2023 | 3646 | 3759 | 4620 |  |
| cb5896_c4/f6p1/3033      | gnl BL_ORD_ID 45880      cb5896_c35/f1p0/3617<br>isoform=cb5896_c4;full_length_coverage=6;non_full_length_coverage=1;isoform_length=3033;expected_accuracy=1.000        | 106  | 2171 | 2167 | 3033 | 1    | 2067 | 2749 | 3615 |  |
| cb13565_c52/f1p3/1664    | gnl BL_ORD_ID 49739      cb6452_c8/f1p4/2559<br>isoform=cb13565_c52;full_length_coverage=1;non_full_length_coverage=0;isoform_length=1664;expected_accuracy=0.996       | 474  | 1655 | 64   | 473  | 1263 | 2441 | 22   | 431  |  |
| cb820_c5/f1p0/6444       | gnl BL_ORD_ID 51001      cb820_c3/f1p0/8069<br>isoform=cb820_c5;full_length_coverage=1;non_full_length_coverage=0;isoform_length=6444;expected_accuracy=0.996           | 1577 | 6348 | 1    | 1582 | 3250 | 8036 | 1285 | 2870 |  |

|                                                                                                                      |                                                                                                                     |                         |      |      |      |      |      |          |      |          |  |
|----------------------------------------------------------------------------------------------------------------------|---------------------------------------------------------------------------------------------------------------------|-------------------------|------|------|------|------|------|----------|------|----------|--|
| y=0.995                                                                                                              |                                                                                                                     |                         |      |      |      |      |      |          |      |          |  |
| cb18456_c1776/f1p0/1211                                                                                              | gnl BL_ORD_ID 69245                                                                                                 | cb18456_c1770/f1p0/1415 | 280  | 1214 | 3    | 285  | 397  | 133<br>1 | 2    | 285      |  |
| cb6036_c5/f1p0/2446                                                                                                  |                                                                                                                     |                         |      |      |      |      |      |          |      |          |  |
| isoform=cb6036_c5;full_length_coverage=1;non_full_length_coverage=0;isoform_length=2446;expected_accuracy=0.993      | gnl BL_ORD_ID 74793                                                                                                 | cb6036_c12/f1p0/2846    | 1061 | 2437 | 1    | 1062 | 1377 | 275<br>3 | 5    | 106<br>6 |  |
| cb8564_c139315/f1p2/3949                                                                                             |                                                                                                                     |                         |      |      |      |      |      |          |      |          |  |
| isoform=cb8564_c139315;full_length_coverage=1;non_full_length_coverage=2;isoform_length=3949;expected_accuracy=0.999 | gnl BL_ORD_ID 56594                                                                                                 | cb8564_c47777/f1p0/4391 | 213  | 3825 | 1    | 214  | 476  | 409<br>9 | 2    | 215      |  |
| cb8564_c86222/f1p1/3397                                                                                              | gnl BL_ORD_ID 16157                                                                                                 | cb8564_c77802/f1p0/3651 |      |      |      |      |      |          |      |          |  |
| isoform=cb8564_c86222;full_length_coverage=1;non_full_length_coverage=1;isoform_length=3397;expected_accuracy=0.999  | isoform=cb8564_c77802;full_length_coverage=1;non_full_length_coverage=0;isoform_length=3651;expected_accuracy=0.996 |                         | 114  | 2646 | 2647 | 3397 | 160  | 269<br>3 | 2810 | 355<br>8 |  |
| cb8564_c145910/f8p2/2344                                                                                             | gnl BL_ORD_ID 13514                                                                                                 | cb8564_c21005/f1p1/4445 |      |      |      |      |      |          |      |          |  |
| isoform=cb8564_c145910;full_length_coverage=8;non_full_length_coverage=2;isoform_length=2344;expected_accuracy=0.995 | isoform=cb8564_c21005;full_length_coverage=1;non_full_length_coverage=1;isoform_length=4445;expected_accuracy=0.999 |                         | 106  | 1942 | 1939 | 2344 | 1    | 183<br>7 | 3560 | 396<br>4 |  |
| cb3309_c14/f1p0/2567                                                                                                 | gnl BL_ORD_ID 40140                                                                                                 | cb3309_c4/f1p1/3664     |      |      |      |      |      |          |      |          |  |
|                                                                                                                      | isoform=cb3309_c4;full_length_coverage=1;non_full_length_coverage=1;isoform_length=3664;expected_accuracy=0.995     |                         | 160  | 2536 | 1    | 162  | 1269 | 364<br>3 | 34   | 200      |  |
| cb5962_c9/f1p2/2694                                                                                                  |                                                                                                                     |                         |      |      |      |      |      |          |      |          |  |
| isoform=cb5962_c9;full_length_coverage=1;non_full_length_coverage=2;isoform_length=2694;expected_accuracy=0.995      | gnl BL_ORD_ID 74719                                                                                                 | cb5962_c18/f1p0/3273    | 1    | 1390 | 1386 | 2688 | 1    | 139<br>0 | 1524 | 282<br>7 |  |

|                                                                                                                                                     |                                                                                                                                                                      |      |      |      |      |      |      |      |      |
|-----------------------------------------------------------------------------------------------------------------------------------------------------|----------------------------------------------------------------------------------------------------------------------------------------------------------------------|------|------|------|------|------|------|------|------|
| acy=0.998<br>cb6611_c5/f1p0/2660<br>isoform=cb6611_c5;full_length_coverage=1;non_full_length_coverage=0;isoform_length=2660;expected_accuracy=1.000 | gnl BL_ORD_ID 49870 cb6611_c2/f1p0/2900                                                                                                                              | 1    | 1663 | 1662 | 2660 | 41   | 1703 | 1879 | 2877 |
| cb5472_c5/f1p0/3130<br>isoform=cb5472_c5;full_length_coverage=1;non_full_length_coverage=0;isoform_length=3130;expected_accuracy=0.995              | gnl BL_ORD_ID 45834 cb5472_c6/f1p0/3267<br>isoform=cb5472_c6;full_length_coverage=1;non_full_length_coverage=0;isoform_length=3267;expected_accuracy=0.991           | 1    | 2614 | 2615 | 3069 | 22   | 2624 | 2813 | 3267 |
| cb8564_c121763/f1p2/2624<br>isoform=cb8564_c121763;full_length_coverage=1;non_full_length_coverage=2;isoform_length=2624;expected_accuracy=0.997    | gnl BL_ORD_ID 10158 cb8564_c108914/f6p2/2897<br>isoform=cb8564_c108914;full_length_coverage=6;non_full_length_coverage=2;isoform_length=2897;expected_accuracy=0.998 | 1    | 2416 | 2417 | 2624 | 12   | 2431 | 2603 | 2810 |
| cb3265_c11/f1p0/2135<br>isoform=cb3265_c11;full_length_coverage=1;non_full_length_coverage=0;isoform_length=2135;expected_accuracy=1.000            | gnl BL_ORD_ID 41416 cb3265_c14/f1p0/2965<br>isoform=cb3265_c14;full_length_coverage=1;non_full_length_coverage=0;isoform_length=2965;expected_accuracy=0.995         | 505  | 2111 | 66   | 504  | 1359 | 2965 | 44   | 482  |
| cb5208_c10/f1p1/2768<br>isoform=cb5208_c10;full_length_coverage=1;non_full_length_coverage=1;isoform_length=2768;expected_accuracy=0.991            | gnl BL_ORD_ID 44771 cb5208_c4/f1p0/3236<br>isoform=cb5208_c4;full_length_coverage=1;non_full_length_coverage=0;isoform_length=3236;expected_accuracy=0.997           | 1    | 1953 | 1952 | 2767 | 226  | 2180 | 2412 | 3234 |
| cb965_c21/f1p0/3360                                                                                                                                 | gnl BL_ORD_ID 19288 cb965_c14/f1p0/4481<br>isoform=cb965_c14;full_length_coverage=1;non_full_length_coverage=0;isoform_length=4481;expected_accuracy=0.998           | 1170 | 3298 | 1    | 1171 | 2234 | 4362 | 803  | 1972 |
| cb792_c53/f1p0/3930                                                                                                                                 | gnl BL_ORD_ID 49470 cb792_c35/f1p1/3973                                                                                                                              | 1    | 1842 | 1838 | 3677 | 86   | 191  | 2047 | 388  |

|                                                                                                                   |                                                                                                                      |                          |     |      |      |      |     |      |      |      |
|-------------------------------------------------------------------------------------------------------------------|----------------------------------------------------------------------------------------------------------------------|--------------------------|-----|------|------|------|-----|------|------|------|
| cb12698_c17/f1p3/1760                                                                                             | gnl BL_ORD_ID 21291                                                                                                  | cb9797_c33/f1p1/2260     |     |      |      |      |     | 6    | 5    |      |
| isoform=cb12698_c17;full_length_coverage=1;non_full_length_coverage=3;isoform_length=1760;expected_accuracy=1.000 | isoform=cb9797_c33;full_length_coverage=1;non_full_length_coverage=1;isoform_length=2260;expected_accuracy=0.995     |                          | 1   | 1222 | 1219 | 1715 | 66  | 1287 | 1766 | 2260 |
| cb8564_c45596/f1p1/3430                                                                                           | gnl BL_ORD_ID 56080                                                                                                  | cb8564_c54387/f1p0/4415  | 2   | 2780 | 2775 | 3379 | 2   | 2783 | 2902 | 3506 |
| cb454_c8/f1p0/2277                                                                                                | gnl BL_ORD_ID 42150                                                                                                  | cb454_c1/f3p0/2382       |     |      |      |      |     |      |      |      |
| isoform=cb454_c8;full_length_coverage=1;non_full_length_coverage=0;isoform_length=2277;expected_accuracy=1.000    | isoform=cb454_c1;full_length_coverage=3;non_full_length_coverage=0;isoform_length=2382;expected_accuracy=1.000       |                          | 277 | 2277 | 94   | 276  | 296 | 2296 | 7    | 189  |
| cb14044_c6/f1p0/1650                                                                                              | gnl BL_ORD_ID 6014                                                                                                   | cb6181_c10/f2p2/1946     |     |      |      |      |     |      |      |      |
| isoform=cb14044_c6;full_length_coverage=1;non_full_length_coverage=0;isoform_length=1650;expected_accuracy=0.996  | isoform=cb6181_c10;full_length_coverage=2;non_full_length_coverage=2;isoform_length=1946;expected_accuracy=0.998     |                          | 1   | 1019 | 1015 | 1650 | 16  | 1045 | 1179 | 1814 |
| cb653_c9/f1p0/4025                                                                                                | gnl BL_ORD_ID 5129                                                                                                   | cb653_c6/f1p0/4151       |     |      |      |      |     |      |      |      |
| isoform=cb653_c9;full_length_coverage=1;non_full_length_coverage=0;isoform_length=4025;expected_accuracy=0.997    | isoform=cb653_c6;full_length_coverage=1;non_full_length_coverage=0;isoform_length=4151;expected_accuracy=0.996       |                          | 301 | 4025 | 1    | 301  | 414 | 4140 | 6    | 308  |
| cb15567_c9/f1p1/1733                                                                                              | gnl BL_ORD_ID 12512                                                                                                  | cb8564_c131767/f1p0/1982 |     |      |      |      |     |      |      |      |
| isoform=cb15567_c9;full_length_coverage=1;non_full_length_coverage=1;isoform_length=1733;expected_accuracy=0.994  | isoform=cb8564_c131767;full_length_coverage=1;non_full_length_coverage=0;isoform_length=1982;expected_accuracy=0.997 |                          | 1   | 1626 | 1622 | 1733 | 1   | 1626 | 1739 | 1850 |
| cb18456_c2426/f1p0/1054                                                                                           | gnl BL_ORD_ID 67421                                                                                                  | cb18456_c2446/f1p3/1392  |     |      |      |      |     |      |      |      |
| isoform=cb18456_c2426;full_length_coverage=1;non_full_length_coverage=0;isoform_length=1054;expected_             |                                                                                                                      |                          | 498 | 1054 | 5    | 500  | 717 | 1273 | 13   | 509  |

|                                                                                                                                                            |                                                                                                                                                              |      |      |      |      |      |          |      |          |
|------------------------------------------------------------------------------------------------------------------------------------------------------------|--------------------------------------------------------------------------------------------------------------------------------------------------------------|------|------|------|------|------|----------|------|----------|
| accuracy=0.993<br>cb1648_c15/f1p0/2133<br>isoform=cb1648_c15;full_length_coverage=1;non_full_length_coverage=0;isoform_length=2133;expected_accuracy=1.000 | gnl BL_ORD_ID 63818 cb1648_c13/f1p0/4230                                                                                                                     | 1    | 1159 | 1159 | 2133 | 3    | 1162     | 2988 | 396<br>2 |
| cb6719_c45/f1p0/1995                                                                                                                                       | gnl BL_ORD_ID 4665 cb6719_c23/f1p3/2664<br>isoform=cb6719_c23;full_length_coverage=1;non_full_length_coverage=3;isoform_length=2664;expected_accuracy=1.000  | 276  | 2007 | 7    | 279  | 765  | 249<br>7 | 169  | 442      |
| cb8564_c12781/f1p0/3625                                                                                                                                    | gnl BL_ORD_ID 53989 cb8564_c16516/f1p0/4473                                                                                                                  | 1462 | 3632 | 1    | 1467 | 1823 | 399<br>3 | 1    | 146<br>8 |
| cb27_c7/f1p0/2206                                                                                                                                          | gnl BL_ORD_ID 37260 cb27_c6/f1p0/2861<br>isoform=cb27_c6;full_length_coverage=1;non_full_length_coverage=0;isoform_length=2861;expected_accuracy=0.996       | 1    | 1524 | 1522 | 2243 | 130  | 165<br>2 | 1966 | 268<br>8 |
| cb8564_c148330/f2p0/2897<br>isoform=cb8564_c148330;full_length_coverage=2;non_full_length_coverage=0;isoform_length=2897;expected_accuracy=0.995           | gnl BL_ORD_ID 56345 cb8564_c74914/f1p0/3530                                                                                                                  | 1278 | 2892 | 1    | 1283 | 1497 | 310<br>3 | 2    | 128<br>4 |
| cb5125_c36/f1p0/1789<br>isoform=cb5125_c36;full_length_coverage=1;non_full_length_coverage=0;isoform_length=1789;expected_accuracy=0.998                   | gnl BL_ORD_ID 43453 cb5125_c17/f1p2/2087<br>isoform=cb5125_c17;full_length_coverage=1;non_full_length_coverage=2;isoform_length=2087;expected_accuracy=0.998 | 1    | 1163 | 1158 | 1756 | 74   | 124<br>8 | 1454 | 205<br>2 |
| cb2758_c6/f1p1/3278<br>isoform=cb2758_c6;full_length_coverage=1;non_full_length_coverage=1;isoform_length=3278;expected_accuracy=0.993                     | gnl BL_ORD_ID 69950 cb2758_c12/f1p0/3518                                                                                                                     | 271  | 3278 | 113  | 272  | 319  | 332<br>7 | 47   | 206      |

|                                                                                                                                                     |                                                                                                                                                                         |      |      |      |      |      |      |      |      |
|-----------------------------------------------------------------------------------------------------------------------------------------------------|-------------------------------------------------------------------------------------------------------------------------------------------------------------------------|------|------|------|------|------|------|------|------|
| acy=1.000<br>cb1278_c4/f2p0/2603<br>isoform=cb1278_c4;full_length_coverage=2;non_full_length_coverage=0;isoform_length=2603;expected_accuracy=0.997 | gnl BL_ORD_ID 27260      cb1278_c6/f1p0/3038<br>isoform=cb1278_c6;full_length_coverage=1;non_full_length_coverage=0;isoform_length=3038;expected_accuracy=0.996         | 1    | 2019 | 2017 | 2603 | 9    | 2026 | 2416 | 3002 |
| cb234_c1/f1p1/4574<br>isoform=cb234_c1;full_length_coverage=1;non_full_length_coverage=1;isoform_length=4574;expected_accuracy=0.997                | gnl BL_ORD_ID 69492      cb234_c6/f1p0/4641                                                                                                                             | 4    | 4236 | 4231 | 4531 | 4    | 4252 | 4369 | 4669 |
| cb9780_c1/f2p0/1733<br>isoform=cb9780_c1;full_length_coverage=2;non_full_length_coverage=0;isoform_length=1733;expected_accuracy=0.995              | gnl BL_ORD_ID 58886      cb9780_c3/f1p0/2086                                                                                                                            | 117  | 1733 | 1    | 120  | 264  | 1882 | 6    | 126  |
| cb8564_c69658/f1p1/2292<br>isoform=cb8564_c69658;full_length_coverage=1;non_full_length_coverage=1;isoform_length=2292;expected_accuracy=0.996      | gnl BL_ORD_ID 17527      cb8564_c84215/f1p0/3183<br>isoform=cb8564_c84215;full_length_coverage=1;non_full_length_coverage=0;isoform_length=3183;expected_accuracy=0.997 | 1    | 1803 | 1801 | 2292 | 1    | 1810 | 2697 | 3182 |
| cb10513_c3/f1p0/1999                                                                                                                                | gnl BL_ORD_ID 55658      cb8564_c3692/f1p0/3493                                                                                                                         | 1    | 1445 | 1444 | 1842 | 22   | 1464 | 2561 | 2959 |
| cb8564_c39546/f1p2/3023                                                                                                                             | gnl BL_ORD_ID 14407      cb8564_c44036/f1p0/3258<br>isoform=cb8564_c44036;full_length_coverage=1;non_full_length_coverage=0;isoform_length=3258;expected_accuracy=0.992 | 1148 | 2835 | 1    | 1148 | 1575 | 3258 | 1    | 1147 |
| cb8564_c2326/f1p0/2006<br>isoform=cb8564_c2326;full_length_coverage=1;non_full_length_coverage=0;isoform_length=2006;expected_ac                    | gnl BL_ORD_ID 13707      cb8564_c2273/f1p2/2502<br>isoform=cb8564_c2273;full_length_coverage=1;non_full_length_coverage=2;isoform_length=2502;expected_ac               | 230  | 2006 | 48   | 234  | 721  | 2502 | 56   | 243  |



|                                                                                                                                                                        |                                                                                                                                                                         |      |      |      |      |      |      |      |      |
|------------------------------------------------------------------------------------------------------------------------------------------------------------------------|-------------------------------------------------------------------------------------------------------------------------------------------------------------------------|------|------|------|------|------|------|------|------|
| curacy=0.990<br>cb1279_c77/f1p0/3526<br>isoform=cb1279_c77;full_length_coverage=1;non_full_length_coverage=0;isoform_length=3526;expected_accuracy=0.994               | curacy=0.995<br>gnl BL_ORD_ID 61182 cb1279_c29/f1p0/3632                                                                                                                | 1    | 2976 | 2972 | 3526 | 1    | 2986 | 3099 | 3655 |
| cb8564_c53266/f1p2/2976                                                                                                                                                | gnl BL_ORD_ID 16809      cb8564_c53349/f1p1/4983<br>isoform=cb8564_c53349;full_length_coverage=1;non_full_length_coverage=1;isoform_length=4983;expected_accuracy=0.997 | 1    | 2754 | 2751 | 2986 | 1874 | 4625 | 4747 | 4982 |
| cb1842_c14/f1p0/2978<br>cb8564_c42513/f1p2/3770<br>isoform=cb8564_c42513;full_length_coverage=1;non_full_length_coverage=2;isoform_length=3770;expected_accuracy=0.997 | gnl BL_ORD_ID 66406 cb1842_c16/f1p0/3507<br>gnl BL_ORD_ID 55981 cb8564_c51070/f1p0/5238                                                                                 | 17   | 2154 | 2151 | 2855 | 2    | 2139 | 2604 | 3308 |
| cb2838_c1/f1p0/2301<br>isoform=cb2838_c1;full_length_coverage=1;non_full_length_coverage=0;isoform_length=2301;expected_accuracy=0.996                                 | gnl BL_ORD_ID 37788      cb2838_c0/f1p0/3795<br>isoform=cb2838_c0;full_length_coverage=1;non_full_length_coverage=0;isoform_length=3795;expected_accuracy=0.994         | 1072 | 2301 | 1    | 1072 | 1184 | 2412 | 5    | 1073 |
| cb6238_c2/f2p0/2826<br>isoform=cb6238_c2;full_length_coverage=2;non_full_length_coverage=0;isoform_length=2826;expected_accuracy=1.000                                 | gnl BL_ORD_ID 5359      cb6238_c5/f1p0/3446<br>isoform=cb6238_c5;full_length_coverage=1;non_full_length_coverage=0;isoform_length=3446;expected_accuracy=0.994          | 1    | 1898 | 1899 | 2826 | 3    | 1895 | 2427 | 3348 |
| cb3843_c6/f1p0/2919<br>isoform=cb3843_c6;full_length_coverage=1;non_full_length_coverage=0;isoform_length=2919;expected_accuracy=0.994                                 | gnl BL_ORD_ID 39769      cb3843_c4/f1p0/3395<br>isoform=cb3843_c4;full_length_coverage=1;non_full_length_coverage=0;isoform_length=3395;expected_accuracy=0.994         | 1    | 1877 | 1875 | 2919 | 168  | 2058 | 2267 | 3320 |

|                                                                                                                                                             |                                                                                                                                                                  |      |      |      |      |      |      |      |      |
|-------------------------------------------------------------------------------------------------------------------------------------------------------------|------------------------------------------------------------------------------------------------------------------------------------------------------------------|------|------|------|------|------|------|------|------|
| acy=0.992<br>cb8564_c39136/f1p0/3036<br>isoform=cb8564_c39136;full_length_coverage=1;non_full_length_coverage=0;isoform_length=3036;expected_accuracy=0.998 | cy=0.992<br>gnl BL_ORD_ID 55243 cb8564_c36242/f1p0/3335                                                                                                          | 1    | 2089 | 2085 | 3035 | 1    | 2098 | 2225 | 3176 |
| cb8564_c3504/f1p0/2587                                                                                                                                      | gnl BL_ORD_ID 15303 cb8564_c3481/f1p0/2830<br>isoform=cb8564_c3481;full_length_coverage=1;non_full_length_coverage=0;isoform_length=2830;expected_accuracy=0.995 | 16   | 1678 | 1674 | 2347 | 18   | 1676 | 2158 | 2830 |
| cb5306_c6/f1p0/2511<br>isoform=cb5306_c6;full_length_coverage=1;non_full_length_coverage=0;isoform_length=2511;expected_accuracy=0.996                      | gnl BL_ORD_ID 45769 cb5306_c4/f1p0/3133<br>isoform=cb5306_c4;full_length_coverage=1;non_full_length_coverage=0;isoform_length=3133;expected_accuracy=0.998       | 1211 | 2511 | 1    | 1214 | 1800 | 3102 | 5    | 1207 |
| cb7563_c5/f2p1/2302<br>isoform=cb7563_c5;full_length_coverage=2;non_full_length_coverage=1;isoform_length=2302;expected_accuracy=1.000                      | gnl BL_ORD_ID 7631 cb7563_c6/f1p2/2589<br>isoform=cb7563_c6;full_length_coverage=1;non_full_length_coverage=2;isoform_length=2589;expected_accuracy=1.000        | 242  | 2300 | 5    | 247  | 531  | 2589 | 1    | 244  |
| cb146_c1/f3p0/3314<br>isoform=cb146_c1;full_length_coverage=3;non_full_length_coverage=0;isoform_length=3314;expected_accuracy=0.998                        | gnl BL_ORD_ID 63558 cb146_c7/f1p0/3617                                                                                                                           | 1182 | 3314 | 1    | 1177 | 1068 | 3209 | 1    | 1187 |
| cb3290_c38/f1p0/2345<br>isoform=cb3290_c38;full_length_coverage=1;non_full_length_coverage=0;isoform_length=2345;expected_accuracy=0.996                    | gnl BL_ORD_ID 40352 cb3290_c43/f1p9/2985<br>isoform=cb3290_c43;full_length_coverage=1;non_full_length_coverage=9;isoform_length=2985;expected_accuracy=0.992     | 1150 | 2345 | 1    | 1151 | 1584 | 2790 | 276  | 1426 |
| cb5600_c17/f1p1/2696                                                                                                                                        | gnl BL_ORD_ID 45243 cb5600_c5/f1p0/2860                                                                                                                          | 1    | 2172 | 2169 | 2696 | 1    | 217  | 2304 | 282  |

|                                                                                                                                                 |                                                                                                                                                                                      |      |      |      |      |      |      |      |      |
|-------------------------------------------------------------------------------------------------------------------------------------------------|--------------------------------------------------------------------------------------------------------------------------------------------------------------------------------------|------|------|------|------|------|------|------|------|
| isoform=cb5600_c17;full_length_coverage=1;non_full_length_coverage=1;isoform_length=2696;expected_accuracy=0.997<br>cb5447_c38/flp1/3528        | isoform=cb5600_c5;full_length_coverage=1;non_full_length_coverage=0;isoform_length=2860;expected_accuracy=0.997<br>gnl BL_ORD_ID 45897                      cb5447_c33/flp0/4199     |      |      |      |      |      | 3    |      | 7    |
| isoform=cb5447_c38;full_length_coverage=1;non_full_length_coverage=1;isoform_length=3528;expected_accuracy=0.997<br>cb8564_c178238/flp1/2052    | isoform=cb5447_c33;full_length_coverage=1;non_full_length_coverage=0;isoform_length=4199;expected_accuracy=0.997<br>gnl BL_ORD_ID 18132                      cb8564_c89813/flp0/3303 | 1    | 2146 | 2146 | 3528 | 15   | 2155 | 2805 | 4183 |
| isoform=cb8564_c178238;full_length_coverage=1;non_full_length_coverage=1;isoform_length=2052;expected_accuracy=0.999<br>cb8564_c11653/flp1/3278 | isoform=cb8564_c89813;full_length_coverage=1;non_full_length_coverage=0;isoform_length=3303;expected_accuracy=0.991<br>gnl BL_ORD_ID 54175   cb8564_c19847/flp1/3929                 | 1005 | 2039 | 1    | 1007 | 2274 | 3303 | 35   | 1029 |
| isoform=cb8564_c11653;full_length_coverage=1;non_full_length_coverage=1;isoform_length=3278;expected_accuracy=0.999<br>cb3664_c10/flp0/2454     | gnl BL_ORD_ID 41173                      cb3664_c4/flp2/3015<br>isoform=cb3664_c4;full_length_coverage=1;non_full_length_coverage=2;isoform_length=3015;expected_accuracy=0.997      | 1153 | 3278 | 1    | 1156 | 1726 | 3853 | 5    | 1162 |
| cb3664_c10/flp0/2454                                                                                                                            | gnl BL_ORD_ID 29399                      cb1492_c3/flp2/4122<br>isoform=cb1492_c3;full_length_coverage=1;non_full_length_coverage=2;isoform_length=4122;expected_accuracy=0.994      | 128  | 2422 | 1    | 129  | 663  | 2957 | 97   | 225  |
| cb1492_c9/flp1/2823                                                                                                                             | isoform=cb1492_c9;full_length_coverage=1;non_full_length_coverage=1;isoform_length=2823;expected_accuracy=1.000<br>cb8564_c36689/flp1/2368                                           | 191  | 2823 | 1    | 196  | 1342 | 3964 | 7    | 201  |
| isoform=cb1492_c9;full_length_coverage=1;non_full_length_coverage=1;isoform_length=2823;expected_accuracy=1.000<br>cb8564_c36689/flp1/2368      | isoform=cb8564_c36689;full_length_coverage=1;non_full_length_coverage=1;isoform_length=2368;expected_                                                                                | 1    | 1709 | 1706 | 2368 | 2    | 1674 | 2088 | 2750 |

|                                                                                                                     |                                              |     |      |      |      |      |          |      |          |  |
|---------------------------------------------------------------------------------------------------------------------|----------------------------------------------|-----|------|------|------|------|----------|------|----------|--|
| accuracy=0.991                                                                                                      |                                              |     |      |      |      |      |          |      |          |  |
| cb18275_c11/f1p1/1730                                                                                               | gnl BL_ORD_ID 53567 cb8564_c128900/f1p0/3172 | 131 | 1733 | 1    | 134  | 1530 | 313<br>2 | 1208 | 134<br>1 |  |
| cb8564_c44074/f1p1/2922                                                                                             |                                              |     |      |      |      |      |          |      |          |  |
| isoform=cb8564_c44074;full_length_coverage=1;non_full_length_coverage=1;isoform_length=2922;expected_accuracy=0.994 | gnl BL_ORD_ID 55920 cb8564_c48949/f1p0/4357  | 1   | 2267 | 2268 | 2922 | 2    | 229<br>3 | 2847 | 350<br>8 |  |
| cb3061_c16/f1p0/2352                                                                                                |                                              |     |      |      |      |      |          |      |          |  |
| isoform=cb3061_c16;full_length_coverage=1;non_full_length_coverage=0;isoform_length=2352;expected_accuracy=0.990    | gnl BL_ORD_ID 69090 cb3061_c19/f1p0/3233     | 175 | 2352 | 1    | 180  | 892  | 307<br>3 | 58   | 237      |  |
| cb8564_c2602/f1p0/2480                                                                                              |                                              |     |      |      |      |      |          |      |          |  |
| isoform=cb8564_c2602;full_length_coverage=1;non_full_length_coverage=0;isoform_length=2480;expected_accuracy=0.995  | gnl BL_ORD_ID 53667 cb8564_c151431/f1p0/2629 | 1   | 1424 | 1423 | 2480 | 50   | 148<br>2 | 1586 | 263<br>9 |  |
| cb3570_c9/f1p0/2911                                                                                                 | gnl BL_ORD_ID 39903 cb3570_c3/f1p0/3091      |     |      |      |      |      |          |      |          |  |
| isoform=cb3570_c3;full_length_coverage=1;non_full_length_coverage=0;isoform_length=3091;expected_accuracy=0.995     |                                              | 155 | 2922 | 1    | 157  | 272  | 303<br>9 | 1    | 157      |  |
| cb8564_c35645/f1p0/2804                                                                                             | gnl BL_ORD_ID 10800 cb8564_c10037/f1p5/2946  |     |      |      |      |      |          |      |          |  |
| isoform=cb8564_c10037;full_length_coverage=1;non_full_length_coverage=5;isoform_length=2946;expected_accuracy=0.994 |                                              | 149 | 2726 | 1    | 151  | 365  | 293<br>8 | 38   | 187      |  |
| cb8564_c3643/f1p0/2518                                                                                              |                                              |     |      |      |      |      |          |      |          |  |
| isoform=cb8564_c3643;full_length_coverage=1;non_full_length_coverage=0;isoform_length=2518;expected_ac              | gnl BL_ORD_ID 54912 cb8564_c3637/f1p0/3675   | 356 | 2498 | 5    | 358  | 1459 | 360<br>7 | 1    | 380      |  |



|                                                                                                                      |                                                                                                                      |                          |     |      |      |      |     |     |      |     |
|----------------------------------------------------------------------------------------------------------------------|----------------------------------------------------------------------------------------------------------------------|--------------------------|-----|------|------|------|-----|-----|------|-----|
| accuracy=0.998                                                                                                       |                                                                                                                      |                          |     |      |      |      |     |     |      |     |
| cb8564_c188097/f1p0/2552                                                                                             | gnl BL_ORD_ID 11957                                                                                                  | cb8564_c135981/f1p0/2840 |     |      |      |      |     |     |      |     |
| isoform=cb8564_c188097;full_length_coverage=1;non_full_length_coverage=0;isoform_length=2552;expected_accuracy=0.996 | isoform=cb8564_c135981;full_length_coverage=1;non_full_length_coverage=0;isoform_length=2840;expected_accuracy=0.992 |                          | 1   | 1945 | 1940 | 2552 | 189 | 212 | 2229 | 284 |
|                                                                                                                      |                                                                                                                      |                          |     |      |      |      |     | 6   |      | 0   |
| cb8564_c41756/f1p0/2738                                                                                              | gnl BL_ORD_ID 16369                                                                                                  | cb8564_c52191/f1p0/2822  |     |      |      |      |     |     |      |     |
| isoform=cb8564_c41756;full_length_coverage=1;non_full_length_coverage=0;isoform_length=2738;expected_accuracy=0.996  | isoform=cb8564_c52191;full_length_coverage=1;non_full_length_coverage=0;isoform_length=2822;expected_accuracy=0.997  |                          | 132 | 2173 | 2170 | 2738 | 88  | 213 | 2254 | 282 |
|                                                                                                                      |                                                                                                                      |                          |     |      |      |      |     | 1   |      | 2   |
| cb2033_c17/f1p0/2200                                                                                                 | gnl BL_ORD_ID 66631                                                                                                  | cb2033_c9/f1p0/2609      |     |      |      |      |     |     |      |     |
|                                                                                                                      |                                                                                                                      |                          | 1   | 1577 | 1576 | 2195 | 2   | 157 | 1689 | 230 |
|                                                                                                                      |                                                                                                                      |                          |     |      |      |      |     | 7   |      | 8   |
| cb8564_c146670/f2p0/2135                                                                                             | gnl BL_ORD_ID 13735                                                                                                  | cb8564_c1944/f1p0/2509   |     |      |      |      |     |     |      |     |
| isoform=cb8564_c146670;full_length_coverage=2;non_full_length_coverage=0;isoform_length=2135;expected_accuracy=0.998 | isoform=cb8564_c1944;full_length_coverage=1;non_full_length_coverage=0;isoform_length=2509;expected_accuracy=0.993   |                          | 129 | 2135 | 1    | 130  | 486 | 249 | 12   | 142 |
|                                                                                                                      |                                                                                                                      |                          |     |      |      |      |     | 2   |      |     |
| cb8564_c181853/f1p0/2119                                                                                             | gnl BL_ORD_ID 55317                                                                                                  | cb8564_c38251/f1p0/3243  |     |      |      |      |     |     |      |     |
| isoform=cb8564_c181853;full_length_coverage=1;non_full_length_coverage=0;isoform_length=2119;expected_accuracy=0.997 |                                                                                                                      |                          | 1   | 1339 | 1334 | 2119 | 1   | 134 | 2188 | 297 |
|                                                                                                                      |                                                                                                                      |                          |     |      |      |      |     | 6   |      | 3   |
| cb8564_c180116/f1p0/2944                                                                                             | gnl BL_ORD_ID 16622                                                                                                  | cb8564_c50151/f1p0/3198  |     |      |      |      |     |     |      |     |
| isoform=cb8564_c180116;full_length_coverage=1;non_full_length_coverage=0;isoform_length=2944;expected_accuracy=0.996 | isoform=cb8564_c50151;full_length_coverage=1;non_full_length_coverage=0;isoform_length=3198;expected_accuracy=0.995  |                          | 1   | 2522 | 2520 | 2944 | 3   | 254 | 2772 | 319 |
|                                                                                                                      |                                                                                                                      |                          |     |      |      |      |     | 3   |      | 6   |
| cb8564_c83476/f1p0/2715                                                                                              | gnl BL_ORD_ID 16335                                                                                                  | cb8564_c72599/f1p2/2911  |     |      |      |      |     |     |      |     |
| isoform=cb8564_c83476;full_length_coverage=1;non_full_length_coverage=0;isoform_length=2715;expected_accuracy=0.996  | isoform=cb8564_c72599;full_length_coverage=1;non_full_length_coverage=2;isoform_length=2911;expected_accuracy=0.996  |                          | 398 | 2714 | 4    | 398  | 545 | 286 | 31   | 434 |
|                                                                                                                      |                                                                                                                      |                          |     |      |      |      |     | 1   |      |     |

|                                                                                                                                                              |                                                                                                                                                                                       |     |      |      |      |     |          |      |          |
|--------------------------------------------------------------------------------------------------------------------------------------------------------------|---------------------------------------------------------------------------------------------------------------------------------------------------------------------------------------|-----|------|------|------|-----|----------|------|----------|
| accuracy=0.996<br>cb5643_c112/f1p0/1970<br>isoform=cb5643_c112;full_length_coverage=1;non_full_length_coverage=0;isoform_length=1970;expected_accuracy=0.992 | curacy=0.997<br>gnl BL_ORD_ID 45701          cb5643_c45/f1p0/3996<br>isoform=cb5643_c45;full_length_coverage=1;non_full_length_coverage=0;isoform_length=3996;expected_accuracy=0.999 | 1   | 1435 | 1434 | 1970 | 50  | 147<br>3 | 3375 | 390<br>5 |
| cb6730_c3/f4p0/2261<br>isoform=cb6730_c3;full_length_coverage=4;non_full_length_coverage=0;isoform_length=2261;expected_accuracy=1.000                       | gnl BL_ORD_ID 4797          cb6730_c26/f1p1/2468<br>isoform=cb6730_c26;full_length_coverage=1;non_full_length_coverage=1;isoform_length=2468;expected_accuracy=0.998                  | 456 | 2261 | 7    | 455  | 624 | 243<br>0 | 1    | 448      |
| cb8564_c50881/f1p2/2125<br>isoform=cb8564_c50881;full_length_coverage=1;non_full_length_coverage=2;isoform_length=2125;expected_accuracy=0.994               | gnl BL_ORD_ID 11756      cb8564_c146467/f10p0/2494<br>isoform=cb8564_c146467;full_length_coverage=10;non_full_length_coverage=0;isoform_length=2494;expected_accuracy=1.000           | 1   | 1863 | 1858 | 2112 | 54  | 191<br>2 | 2190 | 244<br>7 |
| cb8564_c36731/f1p2/2761                                                                                                                                      | gnl BL_ORD_ID 55243      cb8564_c36242/f1p0/3335                                                                                                                                      | 1   | 1977 | 1972 | 2737 | 1   | 198<br>2 | 2411 | 317<br>6 |
| cb2033_c16/f1p0/2147<br>isoform=cb2033_c16;full_length_coverage=1;non_full_length_coverage=0;isoform_length=2147;expected_accuracy=0.994                     | gnl BL_ORD_ID 36040          cb2033_c22/f1p0/2340<br>isoform=cb2033_c22;full_length_coverage=1;non_full_length_coverage=0;isoform_length=2340;expected_accuracy=0.991                 | 1   | 1872 | 1868 | 2147 | 2   | 189<br>7 | 2058 | 233<br>6 |
| cb8564_c75674/f1p0/2870                                                                                                                                      | gnl BL_ORD_ID 17094      cb8564_c78858/f1p0/2927<br>isoform=cb8564_c78858;full_length_coverage=1;non_full_length_coverage=0;isoform_length=2927;expected_accuracy=0.995               | 172 | 2694 | 1    | 173  | 378 | 292<br>7 | 2    | 176      |
| cb5218_c3/f1p0/2697<br>isoform=cb5218_c3;full_length_coverage=1;non_full_length_coverage=0;isoform_length=2697;expected_accuracy=0.994                       | gnl BL_ORD_ID 46533          cb5218_c2/f1p0/3153<br>isoform=cb5218_c2;full_length_coverage=1;non_full_length_coverage=0;isoform_length=3153;expected_accuracy=0.994                   | 1   | 2275 | 2273 | 2697 | 1   | 226<br>8 | 2684 | 310<br>8 |

|                                                                                                                                                             |                                                                                                                                                                                  |      |      |      |      |      |      |      |      |
|-------------------------------------------------------------------------------------------------------------------------------------------------------------|----------------------------------------------------------------------------------------------------------------------------------------------------------------------------------|------|------|------|------|------|------|------|------|
| acy=0.997<br>cb8564_c13767/f3p3/2285<br>isoform=cb8564_c13767;full_length_coverage=3;non_full_length_coverage=3;isoform_length=2285;expected_accuracy=0.996 | cy=0.996<br>gnl BL_ORD_ID 55345 cb8564_c39002/f1p2/2677                                                                                                                          | 1    | 1364 | 1362 | 2184 | 1    | 1364 | 1721 | 2541 |
| cb12_c37/f1p0/4067                                                                                                                                          | gnl BL_ORD_ID 61079 cb12_c11/f1p2/4713                                                                                                                                           | 286  | 4080 | 1    | 288  | 891  | 4693 | 474  | 761  |
| cb8564_c46839/f1p1/2758                                                                                                                                     | gnl BL_ORD_ID 56353 cb8564_c75114/f1p0/2866                                                                                                                                      | 2    | 2036 | 2036 | 2581 | 1    | 2035 | 2193 | 2737 |
| cb309_c9/f1p2/4191<br>isoform=cb309_c9;full_length_coverage=1;non_full_length_coverage=2;isoform_length=4191;expected_accuracy=0.998                        | gnl BL_ORD_ID 38927                      cb309_c3/f2p2/4443<br>isoform=cb309_c3;full_length_coverage=2;non_full_length_coverage=2;isoform_length=4443;expected_accuracy=1.000    | 1    | 3777 | 3776 | 4191 | 22   | 3797 | 4006 | 4421 |
| cb3229_c12/f1p0/2616                                                                                                                                        | gnl BL_ORD_ID 39752                      cb3229_c2/f2p0/2613<br>isoform=cb3229_c2;full_length_coverage=2;non_full_length_coverage=0;isoform_length=2613;expected_accuracy=0.996  | 444  | 2412 | 5    | 448  | 582  | 2557 | 2    | 418  |
| cb6730_c29/f5p1/2459<br>isoform=cb6730_c29;full_length_coverage=5;non_full_length_coverage=1;isoform_length=2459;expected_accuracy=1.000                    | gnl BL_ORD_ID 3442                      cb6730_c30/f4p0/2653<br>isoform=cb6730_c30;full_length_coverage=4;non_full_length_coverage=0;isoform_length=2653;expected_accuracy=1.000 | 492  | 2459 | 6    | 492  | 665  | 2651 | 1    | 494  |
| cb8902_c5/f1p0/2054                                                                                                                                         | gnl BL_ORD_ID 21806                      cb8902_c1/f4p0/2185<br>isoform=cb8902_c1;full_length_coverage=4;non_full_length_coverage=0;isoform_length=2185;expected_accuracy=1.000  | 1    | 1678 | 1673 | 2055 | 5    | 1678 | 1786 | 2168 |
| cb3290_c38/f1p0/2345                                                                                                                                        | gnl BL_ORD_ID 39267                      cb3290_c95/f1p11/2792                                                                                                                   | 1150 | 2345 | 1    | 1151 | 1589 | 278  | 274  | 143  |



|                                                                                                                                         |                                                                                                                                                                                    |     |      |      |      |      |     |      |     |
|-----------------------------------------------------------------------------------------------------------------------------------------|------------------------------------------------------------------------------------------------------------------------------------------------------------------------------------|-----|------|------|------|------|-----|------|-----|
| isoform=cb3290_c38;full_length_coverage=1;non_full_length_coverage=0;isoform_length=2345;expected_accuracy=0.996<br>cb3235_c2/f2p1/3341 | isoform=cb3290_c95;full_length_coverage=1;non_full_length_coverage=11;isoform_length=2792;expected_accuracy=0.993<br>gnl BL_ORD_ID 40515                      cb3235_c6/f1p0/3468  |     |      |      |      |      | 9   |      | 2   |
| isoform=cb3235_c2;full_length_coverage=2;non_full_length_coverage=1;isoform_length=3341;expected_accuracy=0.998                         | isoform=cb3235_c6;full_length_coverage=1;non_full_length_coverage=0;isoform_length=3468;expected_accuracy=1.000<br>gnl BL_ORD_ID 1364                      cb1049_c18/f10p1/3143   | 1   | 2060 | 2058 | 3333 | 1    | 208 | 2192 | 346 |
| cb1049_c13/f1p0/3054                                                                                                                    | isoform=cb1049_c18;full_length_coverage=10;non_full_length_coverage=1;isoform_length=3143;expected_accuracy=1.000<br>gnl BL_ORD_ID 41283                      cb3438_c34/f1p0/2915 | 1   | 1596 | 1593 | 3032 | 1    | 159 | 1703 | 314 |
| cb3438_c26/f1p0/3084                                                                                                                    | isoform=cb3438_c34;full_length_coverage=1;non_full_length_coverage=0;isoform_length=2915;expected_accuracy=0.994                                                                   | 196 | 2794 | 12   | 197  | 301  | 291 | 4    | 187 |
| cb13119_c3/f1p0/1356                                                                                                                    | isoform=cb13119_c3;full_length_coverage=1;non_full_length_coverage=0;isoform_length=1356;expected_accuracy=0.994<br>gnl BL_ORD_ID 71113   cb3343_c7/f1p0/3597                      | 216 | 1356 | 31   | 216  | 2449 | 358 | 2039 | 222 |
| cb1779_c4/f1p0/3691                                                                                                                     | gnl BL_ORD_ID 63947   cb1779_c1/f1p0/4179                                                                                                                                          | 1   | 2830 | 2828 | 3593 | 2    | 283 | 3075 | 384 |
| cb3580_c76/f1p0/2053                                                                                                                    | gnl BL_ORD_ID 39321                      cb3580_c75/f1p0/2886                                                                                                                      |     |      |      |      |      |     |      |     |
| isoform=cb3580_c76;full_length_coverage=1;non_full_length_coverage=0;isoform_length=2053;expected_accuracy=0.992                        | isoform=cb3580_c75;full_length_coverage=1;non_full_length_coverage=0;isoform_length=2886;expected_accuracy=0.999                                                                   | 517 | 2053 | 95   | 519  | 1349 | 288 | 1    | 425 |
| cb11110_c3/f1p0/1566                                                                                                                    | gnl BL_ORD_ID 67250   cb18371_c2/f1p0/1680                                                                                                                                         | 416 | 1566 | 71   | 419  | 492  | 164 | 1    | 349 |



|                                                                                                                                                        |                                                                                                                                                                                    |      |      |      |      |      |          |      |          |
|--------------------------------------------------------------------------------------------------------------------------------------------------------|------------------------------------------------------------------------------------------------------------------------------------------------------------------------------------|------|------|------|------|------|----------|------|----------|
| racy=1.000<br>cb3584_c18/f3p2/2517<br>isoform=cb3584_c18;full_length_coverage=3;non_full_length_coverage=2;isoform_length=2517;expected_accuracy=0.996 | acy=0.991<br>gnl BL_ORD_ID 40786          cb3584_c10/f1p1/3385<br>isoform=cb3584_c10;full_length_coverage=1;non_full_length_coverage=1;isoform_length=3385;expected_accuracy=0.992 | 1    | 1598 | 1597 | 2517 | 12   | 1611     | 1713 | 262<br>5 |
| cb5125_c42/f1p3/2079<br>isoform=cb5125_c42;full_length_coverage=1;non_full_length_coverage=3;isoform_length=2079;expected_accuracy=0.992               | gnl BL_ORD_ID 43457          cb5125_c11/f2p1/2545<br>isoform=cb5125_c11;full_length_coverage=2;non_full_length_coverage=1;isoform_length=2545;expected_accuracy=1.000              | 1    | 1296 | 1294 | 2064 | 46   | 133<br>6 | 1778 | 254<br>4 |
| cb8564_c52191/f1p0/2822<br>isoform=cb8564_c52191;full_length_coverage=1;non_full_length_coverage=0;isoform_length=2822;expected_accuracy=0.997         | gnl BL_ORD_ID 14585          cb8564_c36952/f1p0/3622<br>isoform=cb8564_c36952;full_length_coverage=1;non_full_length_coverage=0;isoform_length=3622;expected_accuracy=0.994        | 423  | 2822 | 84   | 423  | 1229 | 362<br>1 | 133  | 471      |
| cb10083_c9/f1p0/1254                                                                                                                                   | gnl BL_ORD_ID 2910          cb10083_c5/f1p0/2795<br>isoform=cb10083_c5;full_length_coverage=1;non_full_length_coverage=0;isoform_length=2795;expected_accuracy=0.998               | 382  | 1169 | 4    | 382  | 1997 | 278<br>4 | 27   | 408      |
| cb8564_c181074/f1p0/2725<br>isoform=cb8564_c181074;full_length_coverage=1;non_full_length_coverage=0;isoform_length=2725;expected_accuracy=1.000       | gnl BL_ORD_ID 16364          cb8564_c72362/f4p1/4130<br>isoform=cb8564_c72362;full_length_coverage=4;non_full_length_coverage=1;isoform_length=4130;expected_accuracy=0.998        | 148  | 2703 | 1    | 147  | 1570 | 413<br>0 | 78   | 223      |
| cb8564_c178226/f1p0/2728<br>isoform=cb8564_c178226;full_length_coverage=1;non_full_length_coverage=0;isoform_length=2728;expected_accuracy=0.998       | gnl BL_ORD_ID 55359          cb8564_c39546/f1p2/3023                                                                                                                               | 1284 | 2728 | 1    | 1288 | 1391 | 283<br>7 | 1    | 128<br>7 |
| cb3011_c28/f1p0/3136                                                                                                                                   | gnl BL_ORD_ID 38862          cb3011_c30/f1p1/3312                                                                                                                                  | 1    | 2678 | 2677 | 3136 | 1    | 267      | 2801 | 326      |

|                                                                                                                                                |                                                                                                                                                                                                                       |      |      |      |      |      |      |      |      |
|------------------------------------------------------------------------------------------------------------------------------------------------|-----------------------------------------------------------------------------------------------------------------------------------------------------------------------------------------------------------------------|------|------|------|------|------|------|------|------|
| isoform=cb3011_c28;full_length_coverage=1;non_full_length_coverage=0;isoform_length=3136;expected_accuracy=0.997<br>cb5137_c53/f1p0/2672       | isoform=cb3011_c30;full_length_coverage=1;non_full_length_coverage=1;isoform_length=3312;expected_accuracy=0.999<br>gnl BL_ORD_ID 44215      cb5137_c125/f41p0/2869                                                   |      |      |      |      |      | 8    |      | 2    |
| isoform=cb5137_c53;full_length_coverage=1;non_full_length_coverage=0;isoform_length=2672;expected_accuracy=0.992<br>cb3119_c1/f1p0/2995        | isoform=cb5137_c125;full_length_coverage=41;non_full_length_coverage=0;isoform_length=2869;expected_accuracy=1.000<br>gnl BL_ORD_ID 69147      cb3119_c7/f1p0/3565                                                    | 19   | 2565 | 2562 | 2672 | 66   | 2635 | 2739 | 2848 |
| isoform=cb3119_c1;full_length_coverage=1;non_full_length_coverage=0;isoform_length=2995;expected_accuracy=0.995<br>cb1163_c19/f1p0/3148        | gnl BL_ORD_ID 69147      cb3119_c7/f1p0/3565                                                                                                                                                                          | 1    | 2761 | 2762 | 2994 | 5    | 2783 | 3183 | 3416 |
| isoform=cb1163_c19;full_length_coverage=1;non_full_length_coverage=0;isoform_length=3148;expected_accuracy=0.996<br>cb8564_c83545/f1p0/3678    | gnl BL_ORD_ID 23462      cb1163_c14/f1p1/4695<br>isoform=cb1163_c14;full_length_coverage=1;non_full_length_coverage=1;isoform_length=4695;expected_accuracy=0.991<br>gnl BL_ORD_ID 16611      cb8564_c71207/f1p0/4053 | 1431 | 3099 | 1    | 1432 | 3030 | 4695 | 524  | 1955 |
| isoform=cb8564_c71207;full_length_coverage=1;non_full_length_coverage=0;isoform_length=4053;expected_accuracy=0.995<br>cb8564_c89114/f1p1/2346 | isoform=cb8564_c71207;full_length_coverage=1;non_full_length_coverage=0;isoform_length=4053;expected_accuracy=0.995<br>gnl BL_ORD_ID 17527      cb8564_c84215/f1p0/3183                                               | 2    | 2742 | 2742 | 3470 | 61   | 2811 | 3326 | 4053 |
| isoform=cb8564_c89114;full_length_coverage=1;non_full_length_coverage=1;isoform_length=2346;expected_accuracy=1.000<br>cb173_c16/f1p0/2914     | isoform=cb8564_c84215;full_length_coverage=1;non_full_length_coverage=0;isoform_length=3183;expected_accuracy=0.997<br>gnl BL_ORD_ID 63581      cb173_c9/f1p0/4950                                                    | 1    | 1800 | 1798 | 2290 | 10   | 1810 | 2697 | 3183 |
| cb8564_c20202/f1p0/2556                                                                                                                        | gnl BL_ORD_ID 63581      cb173_c9/f1p0/4950                                                                                                                                                                           | 227  | 2727 | 1    | 227  | 1719 | 4219 | 29   | 255  |
|                                                                                                                                                | gnl BL_ORD_ID 15221      cb8564_c25162/f1p0/2742                                                                                                                                                                      | 1    | 2227 | 2224 | 2556 | 17   | 224  | 2406 | 274  |

|                                                                                                                     |                                                                                                                                                                                          |      |      |      |      |      |     |      |     |
|---------------------------------------------------------------------------------------------------------------------|------------------------------------------------------------------------------------------------------------------------------------------------------------------------------------------|------|------|------|------|------|-----|------|-----|
| isoform=cb8564_c20202;full_length_coverage=1;non_full_length_coverage=0;isoform_length=2556;expected_accuracy=0.999 | isoform=cb8564_c25162;full_length_coverage=1;non_full_length_coverage=0;isoform_length=2742;expected_accuracy=0.995                                                                      |      |      |      |      |      | 2   |      | 0   |
| cb3763_c18/f1p0/2884                                                                                                | gnl BL_ORD_ID 40108                      cb3763_c16/f1p1/3107<br>isoform=cb3763_c16;full_length_coverage=1;non_full_length_coverage=1;isoform_length=3107;expected_accuracy=0.998        | 1234 | 2884 | 1    | 1237 | 1359 | 300 | 9    | 124 |
| cb124_c39/f1p0/2659                                                                                                 | gnl BL_ORD_ID 59058                      cb124_c18/f1p0/3758<br>isoform=cb124_c39;full_length_coverage=1;non_full_length_coverage=0;isoform_length=2659;expected_accuracy=0.993          | 464  | 2658 | 79   | 464  | 1378 | 359 | 275  | 661 |
| cb13049_c21/f1p1/1364                                                                                               | gnl BL_ORD_ID 18258                      cb8564_c84027/f1p0/2419<br>isoform=cb8564_c84027;full_length_coverage=1;non_full_length_coverage=0;isoform_length=2419;expected_accuracy=0.997  | 346  | 1350 | 42   | 346  | 1414 | 241 | 1    | 305 |
| cb8564_c188095/f1p0/3177                                                                                            | gnl BL_ORD_ID 14238                      cb8564_c39248/f1p1/3575<br>isoform=cb8564_c188095;full_length_coverage=1;non_full_length_coverage=0;isoform_length=3177;expected_accuracy=0.998 | 1    | 2441 | 2437 | 3157 | 1    | 241 | 2856 | 357 |
| cb3367_c13/f1p0/1942                                                                                                | gnl BL_ORD_ID 40685                      cb3367_c20/f3p0/3095<br>isoform=cb3367_c13;full_length_coverage=1;non_full_length_coverage=0;isoform_length=1942;expected_accuracy=0.998        | 124  | 1942 | 1    | 125  | 1273 | 309 | 8    | 132 |
| cb1956_c11/f1p0/2868                                                                                                | gnl BL_ORD_ID 36248                      cb1956_c2/f5p0/3073<br>isoform=cb1956_c11;full_length_coverage=1;non_full_length_coverage=0;isoform_length=2868;expected_accuracy=0.999         | 1    | 1889 | 1889 | 2859 | 89   | 197 | 2074 | 307 |
|                                                                                                                     |                                                                                                                                                                                          |      |      |      |      |      | 2   |      | 0   |

|                                                                                                                                                      |                                                                                                                                                                                           |     |      |      |      |      |      |      |      |
|------------------------------------------------------------------------------------------------------------------------------------------------------|-------------------------------------------------------------------------------------------------------------------------------------------------------------------------------------------|-----|------|------|------|------|------|------|------|
| racy=0.996<br>cb285_c16/f1p1/2281<br>isoform=cb285_c16;full_length_coverage=1;non_full_length_coverage=1;isoform_length=2281;expected_accuracy=0.999 | cy=0.999<br>gnl BL_ORD_ID 36788                      cb285_c0/f3p1/2363<br>isoform=cb285_c0;full_length_coverage=3;non_full_length_coverage=1;isoform_length=2363;expected_accuracy=0.997 | 265 | 2221 | 5    | 266  | 410  | 2363 | 1    | 273  |
| cb8564_c43779/f1p0/3021<br>isoform=cb8564_c43779;full_length_coverage=1;non_full_length_coverage=0;isoform_length=3021;expected_accuracy=0.993       | gnl BL_ORD_ID 54425   cb8564_c42906/f1p2/3181                                                                                                                                             | 1   | 2344 | 2345 | 3021 | 1    | 2323 | 2479 | 3154 |
| cb3704_c6/f1p1/2658<br>isoform=cb3704_c6;full_length_coverage=1;non_full_length_coverage=1;isoform_length=2658;expected_accuracy=0.998               | gnl BL_ORD_ID 39409                      cb3704_c2/f1p1/2978<br>isoform=cb3704_c2;full_length_coverage=1;non_full_length_coverage=1;isoform_length=2978;expected_accuracy=1.000           | 1   | 2385 | 2383 | 2658 | 132  | 2516 | 2677 | 2953 |
| cb322_c9/f2p0/3136<br>isoform=cb322_c9;full_length_coverage=2;non_full_length_coverage=0;isoform_length=3136;expected_accuracy=1.000                 | gnl BL_ORD_ID 40331                      cb322_c15/f1p0/3487<br>isoform=cb322_c15;full_length_coverage=1;non_full_length_coverage=0;isoform_length=3487;expected_accuracy=0.997           | 1   | 2718 | 2718 | 3135 | 13   | 2728 | 3070 | 3487 |
| cb10142_c1/f1p0/1558                                                                                                                                 | gnl BL_ORD_ID 1637                      cb10142_c4/f1p0/1790<br>isoform=cb10142_c4;full_length_coverage=1;non_full_length_coverage=0;isoform_length=1790;expected_accuracy=0.996          | 1   | 1239 | 1239 | 1560 | 1    | 1240 | 1439 | 1760 |
| cb12_c24/f1p0/4291                                                                                                                                   | gnl BL_ORD_ID 61091   cb12_c58/f1p0/5377                                                                                                                                                  | 241 | 4142 | 1    | 243  | 1406 | 5292 | 769  | 1011 |
| cb5256_c5/f1p1/2755<br>isoform=cb5256_c5;full_length_coverage=1;non_full_length_coverage=1;isoform_length=2755;expected_accuracy=0.999               | gnl BL_ORD_ID 44572                      cb5256_c2/f1p1/2847<br>isoform=cb5256_c2;full_length_coverage=1;non_full_length_coverage=1;isoform_length=2847;expected_accuracy=0.997           | 200 | 2744 | 10   | 199  | 320  | 2847 | 9    | 189  |

|                                                                                                                                                         |                                                                                                                                                                                             |     |      |      |      |      |      |      |     |
|---------------------------------------------------------------------------------------------------------------------------------------------------------|---------------------------------------------------------------------------------------------------------------------------------------------------------------------------------------------|-----|------|------|------|------|------|------|-----|
| acy=0.994<br>cb10903_c12/f1p3/5206<br>isoform=cb10903_c12;full_length_coverage=1;non_full_length_coverage=3;isoform_length=5206;expected_accuracy=0.996 | cy=0.997<br>gnl BL_ORD_ID 566                      cb10903_c8/f1p2/5437<br>isoform=cb10903_c8;full_length_coverage=1;non_full_length_coverage=2;isoform_length=5437;expected_accuracy=0.998 | 4   | 4346 | 4345 | 5206 | 1    | 432  | 4580 | 543 |
| cb8564_c15222/f1p0/2320<br>isoform=cb8564_c15222;full_length_coverage=1;non_full_length_coverage=0;isoform_length=2320;expected_accuracy=0.997          | gnl BL_ORD_ID 56585   cb8564_c47487/f1p0/2550                                                                                                                                               | 1   | 1650 | 1647 | 2310 | 4    | 165  | 1889 | 255 |
| cb3309_c8/f1p0/1954<br>isoform=cb3309_c8;full_length_coverage=1;non_full_length_coverage=0;isoform_length=1954;expected_accuracy=0.995                  | gnl BL_ORD_ID 70310   cb3309_c14/f1p0/2567                                                                                                                                                  | 195 | 1934 | 34   | 196  | 797  | 253  | 1    | 161 |
| cb18230_c2/f1p0/2057<br>isoform=cb18230_c2;full_length_coverage=1;non_full_length_coverage=0;isoform_length=2057;expected_accuracy=0.995                | gnl BL_ORD_ID 63865   cb1683_c28/f1p0/3914                                                                                                                                                  | 420 | 1645 | 58   | 423  | 2731 | 395  | 1832 | 220 |
| cb4624_c0/f2p0/2271<br>isoform=cb4624_c0;full_length_coverage=2;non_full_length_coverage=0;isoform_length=2271;expected_accuracy=0.996                  | gnl BL_ORD_ID 72776   cb4624_c5/f1p0/2432                                                                                                                                                   | 1   | 1369 | 1368 | 2184 | 1    | 136  | 1494 | 230 |
| cb2156_c24/f1p1/2545<br>isoform=cb2156_c24;full_length_coverage=1;non_full_length_coverage=1;isoform_length=2545;expected_accuracy=0.991                | gnl BL_ORD_ID 35205                      cb2156_c25/f1p0/2891<br>isoform=cb2156_c25;full_length_coverage=1;non_full_length_coverage=0;isoform_length=2891;expected_accuracy=0.995           | 1   | 1422 | 1420 | 2545 | 125  | 153  | 1661 | 279 |
| cb8564_c43546/f1p1/3276<br>isoform=cb8564_c43546;full_length_coverage=1;non_full_length_coverage=1;isoform_length=3276;expected_accuracy=0.996          | gnl BL_ORD_ID 14410                      cb8564_c44256/f1p1/3267<br>isoform=cb8564_c44256;full_length_coverage=1;non_full_length_coverage=1;isoform_length=3267;expected_accuracy=0.995     | 10  | 2153 | 2149 | 2854 | 1    | 2119 | 2553 | 325 |

|                                                                                                                     |                                                                                                                      |      |      |      |      |      |      |      |      |  |
|---------------------------------------------------------------------------------------------------------------------|----------------------------------------------------------------------------------------------------------------------|------|------|------|------|------|------|------|------|--|
|                                                                                                                     | curacy=0.995                                                                                                         |      |      |      |      |      |      |      |      |  |
| cb1955_c36/f1p0/2749                                                                                                |                                                                                                                      |      |      |      |      |      |      |      |      |  |
| isoform=cb1955_c36;full_length_coverage=1;non_full_length_coverage=0;isoform_length=2749;expected_accuracy=0.994    | gnl BL_ORD_ID 66534 cb1955_c27/f1p0/3020                                                                             | 1    | 1902 | 1899 | 2748 | 14   | 1916 | 2196 | 3044 |  |
| cb8564_c69135/f3p0/3749                                                                                             | gnl BL_ORD_ID 17407 cb8564_c85285/f1p0/4248                                                                          |      |      |      |      |      |      |      |      |  |
| isoform=cb8564_c69135;full_length_coverage=3;non_full_length_coverage=0;isoform_length=3749;expected_accuracy=0.998 | isoform=cb8564_c85285;full_length_coverage=1;non_full_length_coverage=0;isoform_length=4248;expected_accuracy=0.997  | 1    | 1890 | 1889 | 3736 | 43   | 1930 | 2402 | 4248 |  |
| cb8564_c48235/f1p1/2252                                                                                             | gnl BL_ORD_ID 13472 cb8564_c182192/f1p6/3150                                                                         |      |      |      |      |      |      |      |      |  |
|                                                                                                                     | isoform=cb8564_c182192;full_length_coverage=1;non_full_length_coverage=6;isoform_length=3150;expected_accuracy=0.995 | 1    | 1600 | 1596 | 2253 | 102  | 1707 | 2488 | 3147 |  |
| cb6277_c19/f1p1/2357                                                                                                |                                                                                                                      |      |      |      |      |      |      |      |      |  |
| isoform=cb6277_c19;full_length_coverage=1;non_full_length_coverage=1;isoform_length=2357;expected_accuracy=0.995    | gnl BL_ORD_ID 49578 cb6277_c18/f1p0/2697                                                                             | 1    | 1183 | 1183 | 2286 | 113  | 1295 | 1601 | 2704 |  |
| cb2229_c66/f60p1/2354                                                                                               |                                                                                                                      |      |      |      |      |      |      |      |      |  |
| isoform=cb2229_c66;full_length_coverage=60;non_full_length_coverage=1;isoform_length=2354;expected_accuracy=0.999   | gnl BL_ORD_ID 68360 cb2229_c20/f1p0/3944                                                                             | 1    | 1690 | 1687 | 2299 | 26   | 1723 | 3265 | 3879 |  |
| cb13761_c2/f1p0/1129                                                                                                | gnl BL_ORD_ID 26686 cb13761_c4/f1p0/1251                                                                             |      |      |      |      |      |      |      |      |  |
| isoform=cb13761_c2;full_length_coverage=1;non_full_length_coverage=0;isoform_length=1129;expected_accuracy=0.997    | isoform=cb13761_c4;full_length_coverage=1;non_full_length_coverage=0;isoform_length=1251;expected_accuracy=0.991     | 381  | 1105 | 6    | 380  | 528  | 1250 | 1    | 367  |  |
| cb4016_c18/f1p0/2605                                                                                                | gnl BL_ORD_ID 71728 cb4016_c38/f1p0/2815                                                                             | 1254 | 2566 | 1    | 1256 | 1380 | 269  | 4    | 125  |  |



|                                                                                                                                                |                                             |     |      |      |      |      |      |      |      |   |
|------------------------------------------------------------------------------------------------------------------------------------------------|---------------------------------------------|-----|------|------|------|------|------|------|------|---|
| isoform=cb4016_c18;full_length_coverage=1;non_full_length_coverage=0;isoform_length=2605;expected_accuracy=0.999<br>cb1956_c11/f1p0/2868       |                                             |     |      |      |      |      |      | 1    |      | 9 |
| isoform=cb1956_c11;full_length_coverage=1;non_full_length_coverage=0;isoform_length=2868;expected_accuracy=0.996<br>cb2954_c4/f1p0/3606        | gnl BL_ORD_ID 66542 cb1956_c22/f1p0/3042    | 10  | 1889 | 1889 | 2868 | 3    | 1880 | 1982 | 2971 |   |
| isoform=cb2954_c5;full_length_coverage=1;non_full_length_coverage=0;isoform_length=3687;expected_accuracy=0.998<br>cb584_c43/f3p1/3426         | gnl BL_ORD_ID 37637 cb2954_c5/f1p0/3687     | 2   | 2969 | 2969 | 3515 | 22   | 3006 | 3111 | 3658 |   |
| isoform=cb584_c43;full_length_coverage=3;non_full_length_coverage=1;isoform_length=3426;expected_accuracy=1.000<br>cb8564_c87534/f1p0/3105     | gnl BL_ORD_ID 45633 cb584_c11/f1p0/3581     | 305 | 3426 | 1    | 306  | 424  | 3570 | 19   | 312  |   |
| isoform=cb8564_c44474;full_length_coverage=1;non_full_length_coverage=1;isoform_length=3915;expected_accuracy=0.996<br>cb8564_c36643/f1p3/2668 | gnl BL_ORD_ID 14843 cb8564_c44474/f1p1/3915 | 527 | 2914 | 79   | 532  | 1440 | 3821 | 1    | 454  |   |
| isoform=cb8564_c9820;full_length_coverage=2;non_full_length_coverage=0;isoform_length=3032;expected_accuracy=0.995<br>cb500_c17/f1p0/2323      | gnl BL_ORD_ID 17556 cb8564_c9820/f2p0/3032  | 13  | 1689 | 1687 | 2587 | 7    | 1704 | 2131 | 3032 |   |
| isoform=cb500_c17;full_length_coverage=1;non_full_length_coverage=0;isoform_length=2323;expected_accuracy=0.999                                | gnl BL_ORD_ID 70946 cb500_c74/f1p0/3703     | 1   | 1293 | 1288 | 2323 | 846  | 2138 | 2270 | 3304 |   |

|                          |                     |                          |                                                                                                                      |      |      |      |      |      |      |      |      |
|--------------------------|---------------------|--------------------------|----------------------------------------------------------------------------------------------------------------------|------|------|------|------|------|------|------|------|
| acy=0.997                |                     |                          |                                                                                                                      |      |      |      |      |      |      |      |      |
| cb1163_c42/f1p0/4122     | gnl BL_ORD_ID 23459 | cb1163_c11/f2p1/3742     | isoform=cb1163_c11;full_length_coverage=2;non_full_length_coverage=1;isoform_length=3742;expected_accuracy=0.999     | 120  | 2535 | 2534 | 3651 | 89   | 2504 | 2616 | 3736 |
| cb862_c22/f1p0/3314      | gnl BL_ORD_ID 17905 | cb862_c21/f1p0/3616      | isoform=cb862_c21;full_length_coverage=1;non_full_length_coverage=0;isoform_length=3616;expected_accuracy=1.000      | 182  | 3314 | 1    | 182  | 474  | 3614 | 82   | 264  |
| cb15591_c1/f1p1/1413     | gnl BL_ORD_ID 21104 | cb9317_c10/f1p1/1720     | isoform=cb9317_c10;full_length_coverage=1;non_full_length_coverage=1;isoform_length=1720;expected_accuracy=0.997     | 280  | 1413 | 36   | 284  | 510  | 1646 | 1    | 248  |
| cb8564_c4583/f5p0/2597   | gnl BL_ORD_ID 15246 | cb8564_c4582/f1p0/2713   | isoform=cb8564_c4582;full_length_coverage=1;non_full_length_coverage=0;isoform_length=2713;expected_accuracy=0.997   | 104  | 2597 | 1    | 107  | 222  | 2713 | 1    | 107  |
| cb8564_c121826/f1p0/2708 | gnl BL_ORD_ID 53063 | cb8564_c115478/f1p0/2938 | isoform=cb8564_c115478;full_length_coverage=1;non_full_length_coverage=0;isoform_length=2938;expected_accuracy=0.998 | 1    | 2046 | 2045 | 2708 | 15   | 2067 | 2192 | 2860 |
| cb8564_c18223/f1p0/3446  | gnl BL_ORD_ID 13352 | cb8564_c19199/f1p0/3820  | isoform=cb8564_c19199;full_length_coverage=1;non_full_length_coverage=0;isoform_length=3820;expected_accuracy=0.998  | 1153 | 3445 | 1    | 1154 | 1529 | 3820 | 39   | 1177 |
| cb2831_c22/f1p0/2102     | gnl BL_ORD_ID 70016 | cb2831_c50/f1p0/2799     | isoform=cb2831_c50;full_length_coverage=1;non_full_length_coverage=0;isoform_length=2799;expected_accuracy=0.998     | 1    | 1598 | 1598 | 2095 | 1    | 159  | 2338 | 283  |



|                                                                                                                      |                                                                                                                     |                         |     |      |      |      |      |      |      |      |
|----------------------------------------------------------------------------------------------------------------------|---------------------------------------------------------------------------------------------------------------------|-------------------------|-----|------|------|------|------|------|------|------|
| isoform=cb8564_c41756;full_length_coverage=1;non_full_length_coverage=0;isoform_length=2738;expected_accuracy=0.996  |                                                                                                                     |                         |     |      |      |      |      | 9    | 0    |      |
| cb8564_c163002/f3p0/1920                                                                                             | gnl BL_ORD_ID 14668                                                                                                 | cb8564_c3082/f1p0/2032  |     |      |      |      |      |      |      |      |
| isoform=cb8564_c163002;full_length_coverage=3;non_full_length_coverage=0;isoform_length=1920;expected_accuracy=1.000 | isoform=cb8564_c3082;full_length_coverage=1;non_full_length_coverage=0;isoform_length=2032;expected_accuracy=0.993  |                         | 520 | 1885 | 9    | 521  | 667  | 2032 | 45   | 556  |
| cb8564_c68629/f9p0/2229                                                                                              | gnl BL_ORD_ID 16225                                                                                                 | cb8564_c76305/f1p0/2353 |     |      |      |      |      |      |      |      |
| isoform=cb8564_c68629;full_length_coverage=9;non_full_length_coverage=0;isoform_length=2229;expected_accuracy=1.000  | isoform=cb8564_c76305;full_length_coverage=1;non_full_length_coverage=0;isoform_length=2353;expected_accuracy=1.000 |                         | 1   | 1383 | 1382 | 2183 | 2    | 1384 | 1551 | 2353 |
| cb401_c68/f1p0/2128                                                                                                  | gnl BL_ORD_ID 69611                                                                                                 | cb401_c144/f1p1/2401    |     |      |      |      |      |      |      |      |
| isoform=cb401_c68;full_length_coverage=1;non_full_length_coverage=0;isoform_length=2128;expected_accuracy=0.994      |                                                                                                                     |                         | 676 | 2117 | 8    | 674  | 961  | 2402 | 45   | 711  |
| cb17973_c53/f1p0/1649                                                                                                | gnl BL_ORD_ID 56721                                                                                                 | cb8564_c54312/f1p0/2789 |     |      |      |      |      |      |      |      |
| isoform=cb17973_c53;full_length_coverage=1;non_full_length_coverage=0;isoform_length=1649;expected_accuracy=0.992    |                                                                                                                     |                         | 186 | 1638 | 29   | 186  | 1270 | 2717 | 1    | 157  |
| cb3573_c5/f1p0/3481                                                                                                  | gnl BL_ORD_ID 39163                                                                                                 | cb3573_c0/f1p0/3591     |     |      |      |      |      |      |      |      |
|                                                                                                                      | isoform=cb3573_c0;full_length_coverage=1;non_full_length_coverage=0;isoform_length=3591;expected_accuracy=0.997     |                         | 703 | 3411 | 8    | 707  | 881  | 3591 | 73   | 760  |
| cb470_c8/f1p0/2206                                                                                                   | gnl BL_ORD_ID 72212                                                                                                 | cb470_c9/f1p0/2469      |     |      |      |      |      |      |      |      |
| isoform=cb470_c8;full_length_coverage=1;non_full_length_coverage=0;isoform_length=2206;expected_accuracy=0.997       |                                                                                                                     |                         | 1   | 1503 | 1501 | 2206 | 2    | 1526 | 1753 | 2458 |

|                                                                                                                                                   |                                             |      |      |      |      |      |          |      |          |
|---------------------------------------------------------------------------------------------------------------------------------------------------|---------------------------------------------|------|------|------|------|------|----------|------|----------|
| y=0.993<br>cb5304_c6/f1p0/2203<br>isoform=cb5304_c6;full_length_coverage=1;non_full_length_coverage=0;isoform_length=2203;expected_accuracy=0.997 | gnl BL_ORD_ID 73759 cb5304_c5/f1p0/2736     | 1    | 1509 | 1508 | 2203 | 435  | 193<br>7 | 2052 | 275<br>0 |
| cb2947_c16/f1p0/5590<br>isoform=cb2947_c15;full_length_coverage=1;non_full_length_coverage=0;isoform_length=5692;expected_accuracy=0.995          | gnl BL_ORD_ID 38195 cb2947_c15/f1p0/5692    | 2429 | 5532 | 24   | 2428 | 2589 | 569<br>2 | 1    | 244<br>2 |
| cb3856_c2/f2p0/1678<br>isoform=cb3856_c2;full_length_coverage=2;non_full_length_coverage=0;isoform_length=1678;expected_accuracy=1.000            | gnl BL_ORD_ID 40756 cb3856_c4/f1p1/1955     | 141  | 1678 | 12   | 145  | 307  | 184<br>4 | 1    | 131      |
| cb8564_c37361/f1p0/3076<br>isoform=cb12931_c15;full_length_coverage=1;non_full_length_coverage=0;isoform_length=1493;expected_accuracy=1.000      | gnl BL_ORD_ID 55377 cb8564_c39822/f1p0/3306 | 1    | 2481 | 2477 | 3069 | 1    | 247<br>8 | 2579 | 316<br>9 |
| cb12931_c15/f1p0/1493<br>isoform=cb12931_c15;full_length_coverage=1;non_full_length_coverage=0;isoform_length=1493;expected_accuracy=1.000        | gnl BL_ORD_ID 14615 cb8564_c41756/f1p0/2738 | 1    | 1106 | 1104 | 1492 | 1    | 109<br>8 | 2350 | 273<br>8 |
| cb8564_c75707/f1p1/4363<br>isoform=cb8564_c75707;full_length_coverage=1;non_full_length_coverage=1;isoform_length=4363;expected_accuracy=0.999    | gnl BL_ORD_ID 17119 cb8564_c79662/f1p0/4430 | 3    | 3347 | 3347 | 4363 | 1    | 331<br>0 | 3412 | 442<br>6 |
| cb8564_c20661/f1p2/3083<br>isoform=cb8564_c20661;full_length_coverage=1;non_full_length_coverage=2;isoform_length=3083;expected_                  | gnl BL_ORD_ID 57416 cb8564_c95210/f1p2/3497 | 1    | 2981 | 2978 | 3083 | 31   | 300<br>9 | 3233 | 332<br>7 |

|                                                                                                                  |                                                                                                                     |                         |     |      |      |      |      |      |      |      |
|------------------------------------------------------------------------------------------------------------------|---------------------------------------------------------------------------------------------------------------------|-------------------------|-----|------|------|------|------|------|------|------|
| accuracy=1.000                                                                                                   |                                                                                                                     |                         |     |      |      |      |      |      |      |      |
| cb3119_c2/f1p0/2612                                                                                              | gnl BL_ORD_ID 37651                                                                                                 | cb3119_c1/f1p0/2995     |     |      |      |      |      |      |      |      |
| isoform=cb3119_c2;full_length_coverage=1;non_full_length_coverage=0;isoform_length=2612;expected_accuracy=0.999  | isoform=cb3119_c1;full_length_coverage=1;non_full_length_coverage=0;isoform_length=2995;expected_accuracy=0.995     |                         | 1   | 1763 | 1764 | 2513 | 1    | 1765 | 2011 | 2761 |
| cb322_c28/f1p0/3948                                                                                              | gnl BL_ORD_ID 41025                                                                                                 | cb322_c8/f2p0/3977      |     |      |      |      |      |      |      |      |
|                                                                                                                  | isoform=cb322_c8;full_length_coverage=2;non_full_length_coverage=0;isoform_length=3977;expected_accuracy=0.999      |                         | 140 | 2868 | 2866 | 3771 | 1    | 2729 | 3071 | 3977 |
| cb8564_c39827/f1p1/2907                                                                                          | gnl BL_ORD_ID 14585                                                                                                 | cb8564_c36952/f1p0/3622 |     |      |      |      |      |      |      |      |
|                                                                                                                  | isoform=cb8564_c36952;full_length_coverage=1;non_full_length_coverage=0;isoform_length=3622;expected_accuracy=0.994 |                         | 486 | 2879 | 53   | 486  | 1229 | 3620 | 34   | 471  |
| cb5799_c18/f1p0/2629                                                                                             |                                                                                                                     |                         |     |      |      |      |      |      |      |      |
| isoform=cb5799_c18;full_length_coverage=1;non_full_length_coverage=0;isoform_length=2629;expected_accuracy=0.996 | gnl BL_ORD_ID 74443                                                                                                 | cb5799_c5/f1p0/2915     | 1   | 1913 | 1912 | 2629 | 36   | 1951 | 2056 | 2773 |
| cb6875_c8/f1p0/1799                                                                                              | gnl BL_ORD_ID 5625                                                                                                  | cb6875_c5/f1p0/2662     |     |      |      |      |      |      |      |      |
| isoform=cb6875_c8;full_length_coverage=1;non_full_length_coverage=0;isoform_length=1799;expected_accuracy=0.994  | isoform=cb6875_c5;full_length_coverage=1;non_full_length_coverage=0;isoform_length=2662;expected_accuracy=0.991     |                         | 417 | 1799 | 54   | 417  | 1278 | 2658 | 1    | 365  |
| cb10921_c3/f1p0/1562                                                                                             | gnl BL_ORD_ID 1666                                                                                                  | cb10921_c1/f1p0/2459    |     |      |      |      |      |      |      |      |
|                                                                                                                  | isoform=cb10921_c1;full_length_coverage=1;non_full_length_coverage=0;isoform_length=2459;expected_accuracy=0.991    |                         | 533 | 1427 | 7    | 534  | 1572 | 2455 | 22   | 552  |
| cb8564_c36643/f1p3/2668                                                                                          | gnl BL_ORD_ID 56353                                                                                                 | cb8564_c75114/f1p0/2866 | 13  | 2019 | 2019 | 2565 | 7    | 203  | 2193 | 273  |

|                                                                                                                    |                                                                                                                    |                          |      |      |      |      |      |     |      |     |
|--------------------------------------------------------------------------------------------------------------------|--------------------------------------------------------------------------------------------------------------------|--------------------------|------|------|------|------|------|-----|------|-----|
|                                                                                                                    |                                                                                                                    |                          |      |      |      |      |      | 5   | 7    |     |
| cb2707_c10/f3p0/2850                                                                                               | gnl BL_ORD_ID 36722                                                                                                | cb2707_c55/f1p0/3422     |      |      |      |      |      |     |      |     |
| isoform=cb2707_c10;full_length_coverage=3;non_full_length_coverage=0;isoform_length=2850;expected_accuracy=1.000   | isoform=cb2707_c55;full_length_coverage=1;non_full_length_coverage=0;isoform_length=3422;expected_accuracy=0.995   |                          | 21   | 2379 | 2379 | 2850 | 1    | 235 | 2680 | 315 |
|                                                                                                                    |                                                                                                                    |                          |      |      |      |      |      | 1   |      | 1   |
| cb8564_c2392/f1p2/2510                                                                                             | gnl BL_ORD_ID 13611                                                                                                | cb8564_c2184/f1p0/2606   |      |      |      |      |      |     |      |     |
| isoform=cb8564_c2392;full_length_coverage=1;non_full_length_coverage=2;isoform_length=2510;expected_accuracy=0.992 | isoform=cb8564_c2184;full_length_coverage=1;non_full_length_coverage=0;isoform_length=2606;expected_accuracy=0.995 |                          | 283  | 2510 | 4    | 283  | 384  | 260 | 4    | 272 |
|                                                                                                                    |                                                                                                                    |                          |      |      |      |      |      | 2   |      |     |
| cb6614_c2/f1p0/2730                                                                                                | gnl BL_ORD_ID 4491                                                                                                 | cb6614_c1/f1p0/2809      |      |      |      |      |      |     |      |     |
| isoform=cb6614_c2;full_length_coverage=1;non_full_length_coverage=0;isoform_length=2730;expected_accuracy=0.997    | isoform=cb6614_c1;full_length_coverage=1;non_full_length_coverage=0;isoform_length=2809;expected_accuracy=0.995    |                          | 1    | 2049 | 2050 | 2620 | 24   | 207 | 2239 | 280 |
|                                                                                                                    |                                                                                                                    |                          |      |      |      |      |      | 1   |      | 9   |
| cb944_c41/f1p0/2631                                                                                                | gnl BL_ORD_ID 59104                                                                                                | cb944_c38/f1p0/3532      |      |      |      |      |      |     |      |     |
|                                                                                                                    |                                                                                                                    |                          | 11   | 1592 | 1592 | 2411 | 3    | 158 | 2261 | 308 |
|                                                                                                                    |                                                                                                                    |                          |      |      |      |      |      | 4   |      | 0   |
| cb7748_c1/f3p0/2333                                                                                                | gnl BL_ORD_ID 6409                                                                                                 | cb7748_c4/f1p0/4792      |      |      |      |      |      |     |      |     |
| isoform=cb7748_c1;full_length_coverage=3;non_full_length_coverage=0;isoform_length=2333;expected_accuracy=0.998    | isoform=cb7748_c4;full_length_coverage=1;non_full_length_coverage=0;isoform_length=4792;expected_accuracy=0.996    |                          | 1    | 1797 | 1793 | 2333 | 1    | 182 | 2487 | 302 |
|                                                                                                                    |                                                                                                                    |                          |      |      |      |      |      | 8   |      | 7   |
| cb8433_c12/f1p0/2395                                                                                               | gnl BL_ORD_ID 10988                                                                                                | cb8433_c22/f1p0/5526     |      |      |      |      |      |     |      |     |
| isoform=cb8433_c12;full_length_coverage=1;non_full_length_coverage=0;isoform_length=2395;expected_accuracy=0.996   | isoform=cb8433_c22;full_length_coverage=1;non_full_length_coverage=0;isoform_length=5526;expected_accuracy=0.996   |                          | 1    | 1787 | 1784 | 2395 | 12   | 179 | 3655 | 426 |
|                                                                                                                    |                                                                                                                    |                          |      |      |      |      |      | 5   |      | 8   |
| cb2184_c6/f1p0/2315                                                                                                | gnl BL_ORD_ID 56154                                                                                                | cb8564_c70991/f1p13/4645 |      |      |      |      |      |     |      |     |
|                                                                                                                    |                                                                                                                    |                          | 1090 | 2217 | 1    | 1092 | 1163 | 36  | 3334 | 224 |
|                                                                                                                    |                                                                                                                    |                          |      |      |      |      |      |     |      | 3   |
| cb3582_c3/f1p0/3545                                                                                                | gnl BL_ORD_ID 71348                                                                                                | cb3582_c2/f1p0/3551      |      |      |      |      |      |     |      |     |
|                                                                                                                    |                                                                                                                    |                          | 1312 | 3403 | 1    | 1313 | 1444 | 353 | 2    | 131 |

|                         |                                                                                                                                                                                   |   |      |      |      |     |          |      |          |
|-------------------------|-----------------------------------------------------------------------------------------------------------------------------------------------------------------------------------|---|------|------|------|-----|----------|------|----------|
|                         |                                                                                                                                                                                   |   |      |      |      |     |          | 5    | 4        |
| cb7696_c12/f1p1/1985    | gnl BL_ORD_ID 8427                      cb7696_c11/f3p1/2420<br>isoform=cb7696_c11;full_length_coverage=3;non_full_length_coverage=1;isoform_length=2420;expected_accuracy=0.998  | 1 | 1746 | 1744 | 1980 | 60  | 180<br>4 | 2126 | 236<br>4 |
| cb8198_c6/f1p1/1844     | gnl BL_ORD_ID 9021                      cb8198_c2/f1p0/2433<br>isoform=cb8198_c6;full_length_coverage=1;non_full_length_coverage=1;isoform_length=1844;expected_accuracy=0.995    | 1 | 1109 | 1109 | 1844 | 39  | 1156     | 1630 | 236<br>5 |
| cb381_c1/f1p0/3954      | gnl BL_ORD_ID 40998                      cb381_c6/f1p0/5381<br>isoform=cb381_c1;full_length_coverage=1;non_full_length_coverage=0;isoform_length=3954;expected_accuracy=0.990     | 1 | 2854 | 2853 | 3954 | 821 | 368<br>1 | 4229 | 534<br>2 |
| cb5771_c23/f15p1/2633   | gnl BL_ORD_ID 45084                      cb5771_c5/f1p1/3484<br>isoform=cb5771_c23;full_length_coverage=15;non_full_length_coverage=1;isoform_length=2633;expected_accuracy=1.000 | 1 | 1983 | 1981 | 2617 | 1   | 198<br>2 | 2850 | 348<br>4 |
| cb12714_c29/f1p2/1583   | gnl BL_ORD_ID 54449   cb8564_c122906/f2p13/2871                                                                                                                                   | 1 | 1296 | 1293 | 1597 | 135 | 143<br>0 | 2497 | 280<br>1 |
| cb8564_c33851/f2p0/3455 | gnl BL_ORD_ID 52067   cb8564_c11914/f1p0/3554                                                                                                                                     | 1 | 2078 | 2076 | 3455 | 1   | 204<br>8 | 2158 | 353<br>7 |
| cb573_c9/f1p1/2484      | gnl BL_ORD_ID 46348                      cb573_c10/f1p1/2845<br>isoform=cb573_c9;full_length_coverage=1;non_full_length_coverage=1;isoform_length=2484;expected_accuracy=1.000    | 1 | 1301 | 1299 | 2484 | 59  | 138<br>1 | 1656 | 284<br>2 |



|                                                                                                                                          |                                                                                                                                                                         |      |      |      |      |      |     |      |     |   |
|------------------------------------------------------------------------------------------------------------------------------------------|-------------------------------------------------------------------------------------------------------------------------------------------------------------------------|------|------|------|------|------|-----|------|-----|---|
| y=0.998                                                                                                                                  | cy=0.996                                                                                                                                                                |      |      |      |      |      |     |      |     |   |
| cb7096_c23/f1p0/2569                                                                                                                     | gnl BL_ORD_ID 50336 cb7096_c16/f1p0/2638                                                                                                                                | 164  | 2451 | 1    | 165  | 316  | 259 | 37   | 199 | 5 |
| cb9813_c128/f1p0/1498                                                                                                                    | gnl BL_ORD_ID 58918 cb9813_c53/f1p3/1923                                                                                                                                | 175  | 1498 | 3    | 179  | 356  | 167 | 4    | 180 | 7 |
| cb1960_c41/f1p1/2517                                                                                                                     | gnl BL_ORD_ID 68238 cb1960_c43/f1p0/3174                                                                                                                                | 1    | 2123 | 2120 | 2503 | 32   | 215 | 2552 | 293 | 4 |
| cb8564_c48538/f1p0/2599                                                                                                                  | gnl BL_ORD_ID 13889      cb8564_c34195/f2p1/2830<br>isoform=cb8564_c34195;full_length_coverage=2;non_full_length_coverage=1;isoform_length=2830;expected_accuracy=0.997 | 554  | 2462 | 81   | 556  | 911  | 281 | 2    | 482 | 9 |
| cb2818_c26/f1p0/2862<br>isoform=cb2818_c26;full_length_coverage=1;non_full_length_coverage=0;isoform_length=2862;expected_accuracy=0.993 | gnl BL_ORD_ID 38982      cb2818_c74/f3p0/3087<br>isoform=cb2818_c74;full_length_coverage=3;non_full_length_coverage=0;isoform_length=3087;expected_accuracy=1.000       | 1    | 2471 | 2466 | 2841 | 53   | 253 | 2709 | 308 | 1 |
| cb8564_c91758/f1p1/2726                                                                                                                  | gnl BL_ORD_ID 55116 cb8564_c24808/f1p0/3718                                                                                                                             | 286  | 2672 | 93   | 283  | 961  | 334 | 1    | 187 | 7 |
| cb1163_c13/f1p1/3869<br>isoform=cb1163_c13;full_length_coverage=1;non_full_length_coverage=1;isoform_length=3869;expected_accuracy=0.992 | gnl BL_ORD_ID 59200 cb1163_c12/f1p0/4451                                                                                                                                | 1    | 2493 | 2492 | 3868 | 2    | 250 | 2617 | 399 | 3 |
| cb3290_c38/f1p0/2345<br>isoform=cb3290_c38;full_length_coverage=1;non_full_length_coverage=0;isoform_length=2345;expected_accuracy=0.996 | gnl BL_ORD_ID 39624      cb3290_c189/f9p0/2939<br>isoform=cb3290_c189;full_length_coverage=9;non_full_length_coverage=0;isoform_length=2939;expected_accuracy=1.000     | 1150 | 2345 | 1    | 1151 | 1667 | 286 | 360  | 151 | 2 |
| cb4771_c5/f1p0/2633                                                                                                                      | gnl BL_ORD_ID 72956 cb4771_c3/f1p0/3275                                                                                                                                 | 311  | 2562 | 34   | 314  | 962  | 321 | 1    | 281 |   |

|                                                                                                                                          |                                             |     |      |      |      |     |          |      |          |  |
|------------------------------------------------------------------------------------------------------------------------------------------|---------------------------------------------|-----|------|------|------|-----|----------|------|----------|--|
|                                                                                                                                          |                                             |     |      |      |      |     |          | 3    |          |  |
| cb2825_c0/f7p1/2163<br>isoform=cb2825_c0;full_length_coverage=7;non_full_length_coverage=1;isoform_length=2163;expected_accuracy=1.000   | gnl BL_ORD_ID 70008 cb2825_c6/f1p1/2358     | 242 | 2162 | 82   | 242  | 445 | 236<br>5 | 1    | 159      |  |
| cb4367_c10/f1p1/1298<br>isoform=cb4367_c10;full_length_coverage=1;non_full_length_coverage=1;isoform_length=1298;expected_accuracy=0.995 | gnl BL_ORD_ID 72507 cb4367_c4/f1p0/2078     | 1   | 1129 | 1126 | 1260 | 123 | 124<br>5 | 1665 | 179<br>9 |  |
| cb4380_c4/f1p0/3270<br>isoform=cb4380_c0;full_length_coverage=1;non_full_length_coverage=0;isoform_length=3372;expected_accuracy=0.998   | gnl BL_ORD_ID 41735 cb4380_c0/f1p0/3372     | 481 | 3223 | 60   | 480  | 637 | 337<br>1 | 15   | 431      |  |
| cb2759_c6/f1p0/3412<br>isoform=cb2759_c1;full_length_coverage=1;non_full_length_coverage=0;isoform_length=3776;expected_accuracy=0.992   | gnl BL_ORD_ID 37958 cb2759_c1/f1p0/3776     | 194 | 3069 | 11   | 193  | 907 | 377<br>6 | 27   | 210      |  |
| cb3535_c0/f3p1/3398<br>isoform=cb3535_c0;full_length_coverage=3;non_full_length_coverage=1;isoform_length=3398;expected_accuracy=0.995   | gnl BL_ORD_ID 41049 cb3535_c11/f1p1/3518    | 1   | 2573 | 2569 | 3395 | 1   | 257<br>9 | 2682 | 351<br>8 |  |
| cb2686_c5/f1p0/3171<br>isoform=cb2686_c5;full_length_coverage=1;non_full_length_coverage=0;isoform_length=3171;expected_accuracy=0.994   | gnl BL_ORD_ID 69894 cb2686_c2/f1p0/4322     | 1   | 2343 | 2341 | 3170 | 26  | 236<br>8 | 3515 | 434<br>3 |  |
| cb8564_c188097/f1p0/2552                                                                                                                 | gnl BL_ORD_ID 52715 cb8564_c11997/f1p2/2670 | 1   | 1945 | 1940 | 2521 | 1   | 194      | 2048 | 262      |  |



|                                                                                                                                                              |                                             |      |      |      |      |      |      |      |      |
|--------------------------------------------------------------------------------------------------------------------------------------------------------------|---------------------------------------------|------|------|------|------|------|------|------|------|
| accuracy=0.993<br>cb16776_c28/f1p0/5224<br>isoform=cb16776_c28;full_length_coverage=1;non_full_length_coverage=0;isoform_length=5224;expected_accuracy=0.997 | gnl BL_ORD_ID 65466 cb16776_c11/f1p0/6273   | 16   | 4960 | 4959 | 5224 | 1    | 4952 | 5422 | 5690 |
| cb8564_c68941/f7p1/2708<br>isoform=cb8564_c68941;full_length_coverage=7;non_full_length_coverage=1;isoform_length=2708;expected_accuracy=1.000               | gnl BL_ORD_ID 57844 cb8564_c82408/f1p0/2861 | 583  | 2708 | 62   | 585  | 690  | 2814 | 56   | 579  |
| cb8564_c42814/f1p0/2151<br>isoform=cb8564_c42814;full_length_coverage=1;non_full_length_coverage=0;isoform_length=2151;expected_accuracy=0.993               | gnl BL_ORD_ID 55371 cb8564_c39756/f1p1/3004 | 650  | 2151 | 7    | 652  | 1336 | 2852 | 1    | 648  |
| cb15300_c0/f1p0/1024<br>isoform=cb15300_c1;full_length_coverage=1;non_full_length_coverage=0;isoform_length=1168;expected_accuracy=1.000                     | gnl BL_ORD_ID 28933 cb15300_c1/f1p0/1168    | 100  | 1026 | 1    | 102  | 242  | 1168 | 10   | 113  |
| cb5091_c1/f1p0/2773<br>isoform=cb5091_c1;full_length_coverage=1;non_full_length_coverage=0;isoform_length=2773;expected_accuracy=0.999                       | gnl BL_ORD_ID 73252 cb5091_c0/f1p0/3180     | 1    | 2338 | 2339 | 2756 | 271  | 2608 | 2736 | 3152 |
| cb8564_c145840/f9p2/3901<br>isoform=cb8564_c145840;full_length_coverage=9;non_full_length_coverage=2;isoform_length=3901;expected_accuracy=0.999             | gnl BL_ORD_ID 15430 cb8564_c43033/f1p1/4012 | 1    | 2123 | 2122 | 3867 | 3    | 2127 | 2264 | 4012 |
| cb8564_c42654/f1p1/2906<br>isoform=cb8564_c42654;full_length_coverage=1;non_full_length_coverage=0;isoform_length=2906;expected_accuracy=0.999               | gnl BL_ORD_ID 14407 cb8564_c44036/f1p0/3258 | 1153 | 2824 | 1    | 1153 | 1575 | 323  | 1    | 1147 |

|                                                                                                                                              |                                                                                                                                                                         |     |      |      |      |      |      |      |     |   |  |
|----------------------------------------------------------------------------------------------------------------------------------------------|-------------------------------------------------------------------------------------------------------------------------------------------------------------------------|-----|------|------|------|------|------|------|-----|---|--|
| isoform=cb8564_c42654;full_length_coverage=1;non_full_length_coverage=1;isoform_length=2906;expected_accuracy=0.990<br>cb12931_c15/f1p0/1493 | isoform=cb8564_c44036;full_length_coverage=1;non_full_length_coverage=0;isoform_length=3258;expected_accuracy=0.992                                                     |     |      |      |      |      |      |      |     | 8 |  |
| isoform=cb12931_c15;full_length_coverage=1;non_full_length_coverage=0;isoform_length=1493;expected_accuracy=1.000                            | gnl BL_ORD_ID 56648 cb8564_c50629/f1p3/2919                                                                                                                             | 1   | 1106 | 1104 | 1493 | 4    | 1103 | 2555 | 294 | 4 |  |
| cb8564_c45426/f1p0/2266                                                                                                                      | gnl BL_ORD_ID 13975      cb8564_c42753/f2p0/2720<br>isoform=cb8564_c42753;full_length_coverage=2;non_full_length_coverage=0;isoform_length=2720;expected_accuracy=0.992 | 10  | 1381 | 1379 | 2235 | 17   | 1389 | 1714 | 257 | 1 |  |
| cb2836_c25/f1p0/3140                                                                                                                         | gnl BL_ORD_ID 37734      cb2836_c30/f2p1/3305<br>isoform=cb2836_c30;full_length_coverage=2;non_full_length_coverage=1;isoform_length=3305;expected_accuracy=0.998       | 1   | 1919 | 1916 | 3138 | 6    | 1923 | 2084 | 330 | 5 |  |
| cb5306_c20/f1p0/1640                                                                                                                         | gnl BL_ORD_ID 45775      cb5306_c13/f1p0/2299<br>isoform=cb5306_c13;full_length_coverage=1;non_full_length_coverage=0;isoform_length=2299;expected_accuracy=0.991       | 381 | 1638 | 9    | 384  | 513  | 1771 | 3    | 383 |   |  |
| cb8564_c81040/f1p1/2371                                                                                                                      | gnl BL_ORD_ID 16951      cb8564_c68678/f7p4/2826<br>isoform=cb8564_c68678;full_length_coverage=7;non_full_length_coverage=4;isoform_length=2826;expected_accuracy=1.000 | 1   | 1965 | 1962 | 2481 | 24   | 1990 | 2195 | 271 | 5 |  |
| cb8564_c5255/f1p0/2672                                                                                                                       | gnl BL_ORD_ID 61984 cb12939_c13/f1p0/6119                                                                                                                               | 234 | 2596 | 1    | 235  | 3349 | 5722 | 2440 | 268 | 2 |  |

|                                                                                                                 |                                                                                                                      |                          |      |      |      |      |      |     |   |      |      |   |
|-----------------------------------------------------------------------------------------------------------------|----------------------------------------------------------------------------------------------------------------------|--------------------------|------|------|------|------|------|-----|---|------|------|---|
| curacy=0.997                                                                                                    |                                                                                                                      |                          |      |      |      |      |      |     |   |      |      |   |
| cb4016_c7/f1p0/2879                                                                                             | gnl BL_ORD_ID 41579                                                                                                  | cb4016_c30/f1p1/3132     |      |      |      |      |      |     |   |      |      |   |
| isoform=cb4016_c7;full_length_coverage=1;non_full_length_coverage=0;isoform_length=2879;expected_accuracy=0.998 | isoform=cb4016_c30;full_length_coverage=1;non_full_length_coverage=1;isoform_length=3132;expected_accuracy=0.994     |                          | 204  | 2879 | 16   | 205  | 382  | 307 | 2 | 1    | 194  |   |
| cb548_c80/f1p0/3220                                                                                             | gnl BL_ORD_ID 46779                                                                                                  | cb548_c109/f1p0/3280     |      |      |      |      |      |     |   |      |      |   |
|                                                                                                                 | isoform=cb548_c109;full_length_coverage=1;non_full_length_coverage=0;isoform_length=3280;expected_accuracy=0.996     |                          | 1336 | 3066 | 1    | 1339 | 1551 | 328 | 0 | 2    | 134  | 0 |
| cb8564_c23232/f1p3/2540                                                                                         | gnl BL_ORD_ID 10640                                                                                                  | cb8564_c100234/f2p5/2744 |      |      |      |      |      |     |   |      |      |   |
|                                                                                                                 | isoform=cb8564_c100234;full_length_coverage=2;non_full_length_coverage=5;isoform_length=2744;expected_accuracy=0.993 |                          | 16   | 2172 | 2167 | 2518 | 10   | 217 | 6 | 2278 | 262  | 9 |
| cb8564_c23232/f1p3/2540                                                                                         | gnl BL_ORD_ID 13229                                                                                                  | cb8564_c19083/f1p6/2707  |      |      |      |      |      |     |   |      |      |   |
|                                                                                                                 | isoform=cb8564_c19083;full_length_coverage=1;non_full_length_coverage=6;isoform_length=2707;expected_accuracy=0.992  |                          | 16   | 2172 | 2167 | 2518 | 8    | 220 | 1 | 2303 | 265  | 4 |
| cb5613_c4/f6p1/2465                                                                                             | gnl BL_ORD_ID 44685                                                                                                  | cb5613_c26/f1p0/3883     |      |      |      |      |      |     |   |      |      |   |
| isoform=cb5613_c4;full_length_coverage=6;non_full_length_coverage=1;isoform_length=2465;expected_accuracy=1.000 | isoform=cb5613_c26;full_length_coverage=1;non_full_length_coverage=0;isoform_length=3883;expected_accuracy=0.994     |                          | 103  | 1947 | 1944 | 2465 | 1    | 184 | 1 | 3361 | 388  | 2 |
| cb1119_c6/f1p0/2308                                                                                             | gnl BL_ORD_ID 1542                                                                                                   | cb1119_c3/f1p1/4475      |      |      |      |      |      |     |   |      |      |   |
| isoform=cb1119_c6;full_length_coverage=1;non_full_length_coverage=0;isoform_length=2308;expected_accuracy=0.994 | isoform=cb1119_c3;full_length_coverage=1;non_full_length_coverage=1;isoform_length=4475;expected_accuracy=0.998      |                          | 1039 | 2308 | 1    | 1040 | 1572 | 284 | 4 | 123  | 1164 |   |
| cb4263_c3/f1p1/3036                                                                                             | gnl BL_ORD_ID 43864                                                                                                  | cb4263_c5/f1p1/3378      |      |      |      |      |      |     |   |      |      |   |
|                                                                                                                 |                                                                                                                      |                          | 264  | 3033 | 1    | 265  | 620  | 337 |   | 78   | 342  |   |

|                                                                                                                   |                                                                                                                      |      |      |      |      |      |      |      |      |  |  |
|-------------------------------------------------------------------------------------------------------------------|----------------------------------------------------------------------------------------------------------------------|------|------|------|------|------|------|------|------|--|--|
|                                                                                                                   | isoform=cb4263_c5;full_length_coverage=1;non_full_length_coverage=1;isoform_length=3378;expected_accuracy=1.000      |      |      |      |      |      |      |      | 8    |  |  |
| cb3163_c7/f2p0/2607                                                                                               | gnl BL_ORD_ID 38392      cb3163_c13/f1p0/2685                                                                        |      |      |      |      |      |      |      |      |  |  |
| isoform=cb3163_c7;full_length_coverage=2;non_full_length_coverage=0;isoform_length=2607;expected_accuracy=1.000   | isoform=cb3163_c13;full_length_coverage=1;non_full_length_coverage=0;isoform_length=2685;expected_accuracy=0.995     | 337  | 2604 | 53   | 337  | 422  | 2685 | 3    | 286  |  |  |
| cb1333_c101/f1p0/1395                                                                                             | gnl BL_ORD_ID 61259      cb1333_c109/f1p0/5379                                                                       |      |      |      |      |      |      |      |      |  |  |
| isoform=cb1333_c101;full_length_coverage=1;non_full_length_coverage=0;isoform_length=1395;expected_accuracy=0.997 |                                                                                                                      | 149  | 1395 | 18   | 150  | 3609 | 4853 | 17   | 148  |  |  |
| cb18275_c11/f1p1/1730                                                                                             | gnl BL_ORD_ID 11648      cb8564_c124380/f2p2/2924                                                                    |      |      |      |      |      |      |      |      |  |  |
|                                                                                                                   | isoform=cb8564_c124380;full_length_coverage=2;non_full_length_coverage=2;isoform_length=2924;expected_accuracy=1.000 | 131  | 1733 | 1    | 134  | 1321 | 2924 | 999  | 1132 |  |  |
| cb548_c121/f65p0/2919                                                                                             | gnl BL_ORD_ID 46779      cb548_c109/f1p0/3280                                                                        |      |      |      |      |      |      |      |      |  |  |
| isoform=cb548_c121;full_length_coverage=65;non_full_length_coverage=0;isoform_length=2919;expected_accuracy=1.000 | isoform=cb548_c109;full_length_coverage=1;non_full_length_coverage=0;isoform_length=3280;expected_accuracy=0.996     | 1334 | 2919 | 1    | 1337 | 1551 | 3140 | 6    | 1340 |  |  |
| cb5063_c0/f2p0/1849                                                                                               | gnl BL_ORD_ID 42228      cb5063_c9/f1p0/2367                                                                         |      |      |      |      |      |      |      |      |  |  |
|                                                                                                                   | isoform=cb5063_c9;full_length_coverage=1;non_full_length_coverage=0;isoform_length=2367;expected_accuracy=0.994      | 1    | 1200 | 1198 | 1826 | 350  | 1550 | 1739 | 2367 |  |  |
| cb1956_c5/f2p0/2813                                                                                               | gnl BL_ORD_ID 66538      cb1956_c12/f1p0/3120                                                                        |      |      |      |      |      |      |      |      |  |  |
| isoform=cb1956_c5;full_length_coverage=2;non_full_length_coverage=0;isoform_length=2813;expected_accuracy=0.994   |                                                                                                                      | 1    | 1453 | 1451 | 2813 | 162  | 1610 | 1770 | 3129 |  |  |

|                                                                                                                      |                                                                                                                      |                          |      |      |      |      |      |      |      |      |  |  |
|----------------------------------------------------------------------------------------------------------------------|----------------------------------------------------------------------------------------------------------------------|--------------------------|------|------|------|------|------|------|------|------|--|--|
| acy=0.997                                                                                                            |                                                                                                                      |                          |      |      |      |      |      |      |      |      |  |  |
| cb567_c11/f1p1/3120                                                                                                  | gnl BL_ORD_ID 45926                                                                                                  | cb567_c4/f1p0/3256       |      |      |      |      |      |      |      |      |  |  |
| isoform=cb567_c11;full_length_coverage=1;non_full_length_coverage=1;isoform_length=3120;expected_accuracy=0.993      | isoform=cb567_c4;full_length_coverage=1;non_full_length_coverage=0;isoform_length=3256;expected_accuracy=0.996       |                          | 1    | 2705 | 2703 | 3120 | 20   | 2689 | 2829 | 3240 |  |  |
| cb8564_c37361/f1p0/3076                                                                                              | gnl BL_ORD_ID 15152                                                                                                  | cb8564_c38629/f2p1/3246  |      |      |      |      |      |      |      |      |  |  |
|                                                                                                                      | isoform=cb8564_c38629;full_length_coverage=2;non_full_length_coverage=1;isoform_length=3246;expected_accuracy=0.993  |                          | 1    | 2481 | 2477 | 3070 | 1    | 2511 | 2612 | 3206 |  |  |
| cb8564_c5240/f1p0/2480                                                                                               | gnl BL_ORD_ID 55735                                                                                                  | cb8564_c5247/f1p0/2805   |      |      |      |      |      |      |      |      |  |  |
|                                                                                                                      | isoform=cb8564_c5247;full_length_coverage=1;non_full_length_coverage=0;isoform_length=2805;expected_accuracy=0.993   |                          | 13   | 2066 | 2066 | 2486 | 22   | 2074 | 2188 | 2608 |  |  |
| cb1540_c27/f1p0/3741                                                                                                 | gnl BL_ORD_ID 28146                                                                                                  | cb1540_c4/f2p0/3874      |      |      |      |      |      |      |      |      |  |  |
|                                                                                                                      | isoform=cb1540_c4;full_length_coverage=2;non_full_length_coverage=0;isoform_length=3874;expected_accuracy=0.998      |                          | 304  | 3535 | 1    | 303  | 531  | 3788 | 1    | 302  |  |  |
| cb8564_c110147/f1p0/3399                                                                                             | gnl BL_ORD_ID 10567                                                                                                  | cb8564_c118715/f1p0/3592 |      |      |      |      |      |      |      |      |  |  |
| isoform=cb8564_c110147;full_length_coverage=1;non_full_length_coverage=0;isoform_length=3399;expected_accuracy=0.999 | isoform=cb8564_c118715;full_length_coverage=1;non_full_length_coverage=0;isoform_length=3592;expected_accuracy=0.996 |                          | 1    | 2834 | 2832 | 3347 | 6    | 2848 | 3078 | 3590 |  |  |
| cb1188_c0/f1p0/4430                                                                                                  | gnl BL_ORD_ID 24353                                                                                                  | cb1188_c2/f1p0/5011      |      |      |      |      |      |      |      |      |  |  |
| isoform=cb1188_c0;full_length_coverage=1;non_full_length_coverage=0;isoform_length=4430;expected_accuracy=0.999      | isoform=cb1188_c2;full_length_coverage=1;non_full_length_coverage=0;isoform_length=5011;expected_accuracy=0.997      |                          | 1    | 3659 | 3658 | 4378 | 54   | 3736 | 4160 | 4853 |  |  |
| cb8564_c24235/f1p0/3615                                                                                              | gnl BL_ORD_ID 11514                                                                                                  | cb8564_c12502/f1p0/4194  |      |      |      |      |      |      |      |      |  |  |
|                                                                                                                      | isoform=cb8564_c12502;full_length_coverage=1;non_full_length_coverage=0;isoform_length=4194;expected_accuracy=0.993  |                          | 1422 | 3374 | 13   | 1424 | 2077 | 4029 | 72   | 1480 |  |  |



|                                                                                                                     |                                                                                                                      |                          |     |      |      |      |      |      |      |      |
|---------------------------------------------------------------------------------------------------------------------|----------------------------------------------------------------------------------------------------------------------|--------------------------|-----|------|------|------|------|------|------|------|
|                                                                                                                     | curacy=0.998                                                                                                         |                          |     |      |      |      |      |      |      |      |
| cb5158_c1/f2p0/1308                                                                                                 |                                                                                                                      |                          |     |      |      |      |      |      |      |      |
| isoform=cb5158_c1;full_length_coverage=2;non_full_length_coverage=0;isoform_length=1308;expected_accuracy=0.998     | gnl BL_ORD_ID 73336                                                                                                  | cb5158_c2/f1p0/3008      | 153 | 1308 | 2    | 156  | 1790 | 2949 | 72   | 222  |
| cb5600_c17/f1p1/2696                                                                                                | gnl BL_ORD_ID 46920                                                                                                  | cb5600_c22/f9p0/2763     |     |      |      |      |      |      |      |      |
| isoform=cb5600_c17;full_length_coverage=1;non_full_length_coverage=1;isoform_length=2696;expected_accuracy=0.997    | isoform=cb5600_c22;full_length_coverage=9;non_full_length_coverage=0;isoform_length=2763;expected_accuracy=1.000     |                          | 1   | 2172 | 2169 | 2615 | 14   | 2186 | 2318 | 2763 |
| cb8564_c82539/f7p3/2550                                                                                             | gnl BL_ORD_ID 13431                                                                                                  | cb8564_c19588/f1p0/3337  |     |      |      |      |      |      |      |      |
|                                                                                                                     | isoform=cb8564_c19588;full_length_coverage=1;non_full_length_coverage=0;isoform_length=3337;expected_accuracy=0.997  |                          | 1   | 2040 | 2040 | 2475 | 2    | 2039 | 2902 | 3337 |
| cb8564_c50089/f1p0/2929                                                                                             | gnl BL_ORD_ID 11125                                                                                                  | cb8564_c107332/f9p1/3308 |     |      |      |      |      |      |      |      |
| isoform=cb8564_c50089;full_length_coverage=1;non_full_length_coverage=0;isoform_length=2929;expected_accuracy=0.993 | isoform=cb8564_c107332;full_length_coverage=9;non_full_length_coverage=1;isoform_length=3308;expected_accuracy=0.997 |                          | 1   | 2301 | 2305 | 2929 | 42   | 2347 | 2646 | 3272 |
| cb8564_c36731/f1p2/2761                                                                                             | gnl BL_ORD_ID 16219                                                                                                  | cb8564_c47828/f1p0/3035  |     |      |      |      |      |      |      |      |
|                                                                                                                     | isoform=cb8564_c47828;full_length_coverage=1;non_full_length_coverage=0;isoform_length=3035;expected_accuracy=0.991  |                          | 1   | 1977 | 1972 | 2734 | 1    | 1982 | 2276 | 3035 |
| cb3344_c6/f1p0/2126                                                                                                 | gnl BL_ORD_ID 40986                                                                                                  | cb3344_c2/f4p1/3653      |     |      |      |      |      |      |      |      |
| isoform=cb3344_c6;full_length_coverage=1;non_full_length_coverage=0;isoform_length=2126;expected_accuracy=0.997     | isoform=cb3344_c2;full_length_coverage=4;non_full_length_coverage=1;isoform_length=3653;expected_accuracy=0.998      |                          | 1   | 1431 | 1430 | 2125 | 58   | 1488 | 2819 | 3517 |
| cb8564_c45864/f1p0/2965                                                                                             | gnl BL_ORD_ID 17556                                                                                                  | cb8564_c9820/f2p0/3032   | 16  | 1705 | 1703 | 2601 | 13   | 170  | 2131 | 302  |

|                                                                                                                      |                                                                                                                      |     |      |      |      |      |      |      |      |
|----------------------------------------------------------------------------------------------------------------------|----------------------------------------------------------------------------------------------------------------------|-----|------|------|------|------|------|------|------|
|                                                                                                                      | isoform=cb8564_c9820;full_length_coverage=2;non_full_length_coverage=0;isoform_length=3032;expected_accuracy=0.995   |     |      |      |      |      |      | 4    | 9    |
| cb3557_c15/f1p0/2674                                                                                                 | gnl BL_ORD_ID 39538      cb3557_c9/f1p0/3261                                                                         |     |      |      |      |      |      |      |      |
| isoform=cb3557_c15;full_length_coverage=1;non_full_length_coverage=0;isoform_length=2674;expected_accuracy=0.995     | isoform=cb3557_c9;full_length_coverage=1;non_full_length_coverage=0;isoform_length=3261;expected_accuracy=0.995      | 1   | 1978 | 1976 | 2627 | 83   | 2056 | 2608 | 3253 |
| cb8564_c129638/f1p0/2479                                                                                             | gnl BL_ORD_ID 13043      cb8564_c170549/f2p3/3030                                                                    |     |      |      |      |      |      |      |      |
| isoform=cb8564_c129638;full_length_coverage=2;non_full_length_coverage=3;isoform_length=3030;expected_accuracy=0.997 | isoform=cb8564_c170549;full_length_coverage=2;non_full_length_coverage=3;isoform_length=3030;expected_accuracy=0.997 | 1   | 1627 | 1623 | 2475 | 79   | 1705 | 2110 | 2962 |
| cb8564_c45300/f1p4/3014                                                                                              | gnl BL_ORD_ID 56002      cb8564_c51722/f1p1/3503                                                                     |     |      |      |      |      |      |      |      |
| isoform=cb8564_c45300;full_length_coverage=1;non_full_length_coverage=4;isoform_length=3014;expected_accuracy=0.996  | isoform=cb8564_c51722;full_length_coverage=1;non_full_length_coverage=4;isoform_length=3503;expected_accuracy=0.996  | 243 | 3014 | 22   | 246  | 442  | 3214 | 67   | 285  |
| cb1467_c0/f2p0/4330                                                                                                  | gnl BL_ORD_ID 63644      cb1467_c5/f1p0/5220                                                                         |     |      |      |      |      |      |      |      |
| isoform=cb1467_c0;full_length_coverage=2;non_full_length_coverage=0;isoform_length=4330;expected_accuracy=0.994      | isoform=cb1467_c5;full_length_coverage=2;non_full_length_coverage=0;isoform_length=5220;expected_accuracy=0.994      | 382 | 4205 | 1    | 384  | 1092 | 4915 | 31   | 416  |
| cb8564_c84266/f1p2/3194                                                                                              | gnl BL_ORD_ID 13766      cb8564_c18520/f2p0/3299                                                                     |     |      |      |      |      |      |      |      |
| isoform=cb8564_c84266;full_length_coverage=2;non_full_length_coverage=0;isoform_length=3194;expected_accuracy=0.992  | isoform=cb8564_c18520;full_length_coverage=2;non_full_length_coverage=0;isoform_length=3299;expected_accuracy=0.992  | 1   | 2064 | 2064 | 3165 | 27   | 2089 | 2198 | 3299 |
| cb6277_c13/f1p0/2679                                                                                                 | gnl BL_ORD_ID 4562      cb6277_c30/f4p0/2856                                                                         |     |      |      |      |      |      |      |      |
| isoform=cb6277_c13;full_length_coverage=4;non_full_length_coverage=0;isoform_length=2679;expected_accuracy=0.995     | isoform=cb6277_c30;full_length_coverage=4;non_full_length_coverage=0;isoform_length=2856;expected_accuracy=0.995     | 202 | 2669 | 1    | 203  | 392  | 2856 | 88   | 290  |



|                          |                                                                                                                                                                           |     |      |      |      |     |      |      |      |  |  |
|--------------------------|---------------------------------------------------------------------------------------------------------------------------------------------------------------------------|-----|------|------|------|-----|------|------|------|--|--|
|                          |                                                                                                                                                                           |     |      |      |      |     |      |      | 5    |  |  |
| cb373_c39/f1p0/4415      | gnl BL_ORD_ID 41210      cb373_c12/f1p1/3932<br>isoform=cb373_c12;full_length_coverage=1;non_full_length_coverage=1;isoform_length=3932;expected_accuracy=0.996           | 16  | 3355 | 3354 | 3759 | 6   | 3348 | 3527 | 3932 |  |  |
| cb8564_c109758/f2p1/2747 | gnl BL_ORD_ID 11141      cb8564_c109409/f3p1/2839<br>isoform=cb8564_c109758;full_length_coverage=2;non_full_length_coverage=1;isoform_length=2747;expected_accuracy=0.997 | 22  | 2255 | 2255 | 2747 | 1   | 2233 | 2347 | 2839 |  |  |
| cb12931_c15/f1p0/1493    | gnl BL_ORD_ID 55574      cb8564_c45699/f1p0/3005<br>isoform=cb12931_c15;full_length_coverage=1;non_full_length_coverage=0;isoform_length=1493;expected_accuracy=1.000     | 1   | 1106 | 1104 | 1493 | 1   | 1084 | 2462 | 2849 |  |  |
| cb8564_c136465/f1p3/3229 | gnl BL_ORD_ID 16338      cb8564_c53034/f1p2/3495<br>isoform=cb8564_c136465;full_length_coverage=1;non_full_length_coverage=3;isoform_length=3229;expected_accuracy=0.992  | 129 | 3162 | 1    | 133  | 468 | 3493 | 12   | 145  |  |  |
| cb8564_c41756/f1p0/2738  | gnl BL_ORD_ID 55213      cb8564_c35568/f1p0/2997<br>isoform=cb8564_c41756;full_length_coverage=1;non_full_length_coverage=0;isoform_length=2738;expected_accuracy=0.996   | 1   | 2173 | 2170 | 2738 | 13  | 2200 | 2323 | 2889 |  |  |
| cb4493_c8/f1p0/2014      | gnl BL_ORD_ID 42702      cb4493_c7/f1p1/3006<br>isoform=cb4493_c8;full_length_coverage=1;non_full_length_coverage=0;isoform_length=2014;expected_accuracy=0.991           | 1   | 1023 | 1024 | 2014 | 152 | 1178 | 1992 | 3000 |  |  |
| cb4674_c38/f1p2/3131     | gnl BL_ORD_ID 43463      cb4674_c77/f1p2/3189<br>isoform=cb4674_c38;full_length_coverage=1;non_full_length_coverage=0;isoform_length=3131;expected_accuracy=0.995         | 13  | 2405 | 2404 | 3062 | 1   | 239  | 2533 | 318  |  |  |

|                          |                                                                                                                                                                         |    |      |      |      |      |          |      |          |
|--------------------------|-------------------------------------------------------------------------------------------------------------------------------------------------------------------------|----|------|------|------|------|----------|------|----------|
|                          | isoform=cb4674_c77;full_length_coverage=1;non_full_length_coverage=2;isoform_length=3189;expected_accuracy=0.999                                                        |    |      |      |      |      |          | 2    | 9        |
| cb4469_c6/f1p0/2503      | gnl BL_ORD_ID 44310      cb4469_c5/f1p0/2979<br>isoform=cb4469_c5;full_length_coverage=1;non_full_length_coverage=0;isoform_length=2979;expected_accuracy=0.997         | 1  | 1835 | 1834 | 2500 | 59   | 189<br>1 | 2257 | 292<br>1 |
| cb309_c19/f1p0/1785      | isoform=cb309_c19;full_length_coverage=1;non_full_length_coverage=0;isoform_length=1785;expected_accuracy=0.996                                                         |    |      |      |      |      |          |      |          |
|                          | gnl BL_ORD_ID 69547      cb309_c21/f1p0/4520                                                                                                                            | 1  | 1335 | 1336 | 1785 | 2386 | 372<br>0 | 3936 | 438<br>5 |
| cb8564_c49821/f1p1/2905  | gnl BL_ORD_ID 14278      cb8564_c36280/f1p0/3133<br>isoform=cb8564_c36280;full_length_coverage=1;non_full_length_coverage=0;isoform_length=3133;expected_accuracy=1.000 | 1  | 1544 | 1541 | 2881 | 43   | 158<br>6 | 1804 | 3115     |
| cb8564_c48645/f1p1/3287  | gnl BL_ORD_ID 55939      cb8564_c49630/f1p4/3487                                                                                                                        | 17 | 2918 | 2918 | 3113 | 10   | 291<br>3 | 3243 | 343<br>8 |
| cb6181_c7/f6p0/2362      | isoform=cb6181_c7;full_length_coverage=6;non_full_length_coverage=0;isoform_length=2362;expected_accuracy=1.000                                                         |    |      |      |      |      |          |      |          |
|                          | gnl BL_ORD_ID 49488      cb6181_c15/f1p0/3250                                                                                                                           | 1  | 1260 | 1260 | 2362 | 11   | 127<br>0 | 1486 | 259<br>0 |
| cb8564_c40598/f1p4/3119  | gnl BL_ORD_ID 15063      cb8564_c37149/f1p9/3212<br>isoform=cb8564_c37149;full_length_coverage=1;non_full_length_coverage=9;isoform_length=3212;expected_accuracy=0.991 | 19 | 2732 | 2729 | 3050 | 61   | 277<br>2 | 2893 | 321<br>2 |
| cb8564_c183213/f1p3/3190 | gnl BL_ORD_ID 57750      cb8564_c79653/f1p0/3642                                                                                                                        | 1  | 2313 | 2318 | 3110 | 64   | 237      | 2703 | 349      |

|                                                                                                                                                  |                                             |    |      |      |      |      |      |      |      |
|--------------------------------------------------------------------------------------------------------------------------------------------------|---------------------------------------------|----|------|------|------|------|------|------|------|
| isoform=cb8564_c183213;full_length_coverage=1;non_full_length_coverage=3;isoform_length=3190;expected_accuracy=0.999<br>cb8564_c44698/f1p5/2843  |                                             |    |      |      |      |      |      | 6    | 5    |
| isoform=cb8564_c44698;full_length_coverage=1;non_full_length_coverage=5;isoform_length=2843;expected_accuracy=0.997<br>cb2101_c8/f1p0/1743       | gnl BL_ORD_ID 55327 cb8564_c38462/f1p0/3241 | 1  | 2516 | 2511 | 2828 | 1    | 2503 | 2624 | 2946 |
| cb8564_c44698/f1p5/2843                                                                                                                          | gnl BL_ORD_ID 66713 cb2101_c4/f1p0/3801     | 13 | 1455 | 1454 | 1736 | 968  | 2412 | 3383 | 3665 |
| isoform=cb8564_c44698;full_length_coverage=1;non_full_length_coverage=5;isoform_length=2843;expected_accuracy=0.997<br>cb8564_c44698/f1p5/2843   | gnl BL_ORD_ID 55341 cb8564_c38927/f1p0/3326 | 1  | 2516 | 2511 | 2832 | 7    | 2518 | 2639 | 2966 |
| cb965_c18/f1p0/2545                                                                                                                              | gnl BL_ORD_ID 20577 cb965_c22/f1p1/4708     |    |      |      |      |      |      |      |      |
| isoform=cb965_c18;full_length_coverage=1;non_full_length_coverage=0;isoform_length=2545;expected_accuracy=1.000<br>cb8564_c177939/f1p0/1977      | gnl BL_ORD_ID 55341 cb8564_c38927/f1p0/3326 | 1  | 1828 | 1826 | 2543 | 1497 | 3320 | 3990 | 4708 |
| isoform=cb8564_c177939;full_length_coverage=1;non_full_length_coverage=0;isoform_length=1977;expected_accuracy=1.000<br>cb8564_c177939/f1p0/1977 | gnl BL_ORD_ID 54765 cb8564_c2442/f1p1/2806  | 1  | 1724 | 1723 | 1974 | 2    | 1723 | 2241 | 2492 |
| cb2265_c8/f1p0/3520                                                                                                                              | gnl BL_ORD_ID 36890 cb2265_c4/f1p1/3992     |    |      |      |      |      |      |      |      |
| isoform=cb2265_c4;full_length_coverage=1;non_full_length_coverage=1;isoform_length=3992;expected_accuracy=0.997<br>cb8564_c15653/f1p4/2475       | gnl BL_ORD_ID 54765 cb8564_c2442/f1p1/2806  | 1  | 2407 | 2404 | 3346 | 20   | 2427 | 3049 | 3990 |
| isoform=cb8564_c15653;full_length_coverage=1;non_full_length_coverage=1;isoform_length=2475;expected_accuracy=0.999                              | gnl BL_ORD_ID 58179 cb8564_c90747/f1p0/2795 | 22 | 2293 | 2289 | 2441 | 32   | 227  | 2495 | 264  |

|                                                                                                                                                  |                                                                                                                                                                           |     |      |      |      |      |      |      |      |
|--------------------------------------------------------------------------------------------------------------------------------------------------|---------------------------------------------------------------------------------------------------------------------------------------------------------------------------|-----|------|------|------|------|------|------|------|
|                                                                                                                                                  |                                                                                                                                                                           |     |      |      |      |      |      | 6    | 7    |
| cb2097_c58/f1p0/2505<br>isoform=cb2097_c58;full_length_coverage=1;non_full_length_coverage=0;isoform_length=2505;expected_accuracy=0.998         | gnl BL_ORD_ID 35690      cb2097_c59/f1p0/3019<br>isoform=cb2097_c59;full_length_coverage=1;non_full_length_coverage=0;isoform_length=3019;expected_accuracy=0.995         | 1   | 1583 | 1581 | 2505 | 5    | 1587 | 2095 | 3019 |
| cb8564_c15230/f1p0/1944                                                                                                                          | gnl BL_ORD_ID 55860      cb8564_c47209/f1p0/3227                                                                                                                          | 352 | 1920 | 8    | 357  | 1091 | 2657 | 16   | 381  |
| cb5772_c13/f1p0/1660                                                                                                                             | gnl BL_ORD_ID 44721      cb5772_c4/f3p1/1610<br>isoform=cb5772_c4;full_length_coverage=3;non_full_length_coverage=1;isoform_length=1610;expected_accuracy=1.000           | 168 | 1506 | 9    | 170  | 271  | 1608 | 4    | 170  |
| cb8564_c4757/f1p0/2740                                                                                                                           | gnl BL_ORD_ID 55688      cb8564_c4747/f1p0/2838                                                                                                                           | 103 | 1661 | 1659 | 2702 | 1    | 1559 | 1807 | 2853 |
| cb8564_c44063/f1p0/2503<br>isoform=cb8564_c44063;full_length_coverage=1;non_full_length_coverage=0;isoform_length=2503;expected_accuracy=0.999   | gnl BL_ORD_ID 53915      cb8564_c14767/f1p3/2856                                                                                                                          | 397 | 2455 | 4    | 402  | 549  | 2607 | 5    | 404  |
| cb17388_c6/f1p2/1438<br>isoform=cb17388_c6;full_length_coverage=1;non_full_length_coverage=2;isoform_length=1438;expected_accuracy=0.992         | gnl BL_ORD_ID 10293      cb8564_c118743/f1p2/1948<br>isoform=cb8564_c118743;full_length_coverage=1;non_full_length_coverage=2;isoform_length=1948;expected_accuracy=0.998 | 1   | 1088 | 1086 | 1438 | 2    | 1085 | 1276 | 1626 |
| cb8564_c125478/f1p1/2270<br>isoform=cb8564_c125478;full_length_coverage=1;non_full_length_coverage=1;isoform_length=2270;expected_accuracy=1.000 | gnl BL_ORD_ID 11370      cb8564_c139900/f2p2/3938<br>isoform=cb8564_c139900;full_length_coverage=2;non_full_length_coverage=2;isoform_length=3938;expected_accuracy=0.998 | 221 | 2270 | 1    | 222  | 1861 | 3912 | 147  | 364  |
| cb8564_c68992/f1p5/3235                                                                                                                          | gnl BL_ORD_ID 12196      cb8564_c12654/f2p0/4122                                                                                                                          | 1   | 1908 | 1908 | 3235 | 2    | 190  | 2784 | 410  |

|                                                                                                                                                 |                                                                                                                                                                          |     |      |      |      |      |      |      |      |
|-------------------------------------------------------------------------------------------------------------------------------------------------|--------------------------------------------------------------------------------------------------------------------------------------------------------------------------|-----|------|------|------|------|------|------|------|
| isoform=cb8564_c68992;full_length_coverage=1;non_full_length_coverage=5;isoform_length=3235;expected_accuracy=0.995<br>cb8564_c146072/f3p3/2176 | isoform=cb8564_c12654;full_length_coverage=2;non_full_length_coverage=0;isoform_length=4122;expected_accuracy=1.000<br>gnl BL_ORD_ID 12438      cb8564_c125968/f2p3/2612 |     |      |      |      |      | 1    |      | 9    |
| isoform=cb8564_c146072;full_length_coverage=3;non_full_length_coverage=3;isoform_length=2176;expected_accuracy=1.000                            | isoform=cb8564_c125968;full_length_coverage=2;non_full_length_coverage=3;isoform_length=2612;expected_accuracy=0.997<br>gnl BL_ORD_ID 13846      cb8564_c22100/f1p0/4833 | 211 | 2165 | 1    | 215  | 561  | 2517 | 16   | 231  |
| cb8564_c24286/f1p0/3377                                                                                                                         | isoform=cb8564_c22100;full_length_coverage=1;non_full_length_coverage=0;isoform_length=4833;expected_accuracy=0.995<br>gnl BL_ORD_ID 40380      cb3665_c0/f7p0/2852      | 1   | 2887 | 2886 | 3386 | 1270 | 4142 | 4252 | 4753 |
| cb3665_c20/f1p0/2779                                                                                                                            | isoform=cb3665_c0;full_length_coverage=7;non_full_length_coverage=0;isoform_length=2852;expected_accuracy=1.000<br>gnl BL_ORD_ID 40755      cb4098_c12/f2p1/4674         | 1   | 1482 | 1479 | 2669 | 49   | 1530 | 1661 | 2851 |
| cb4098_c13/f2p1/3772                                                                                                                            | isoform=cb4098_c12;full_length_coverage=2;non_full_length_coverage=1;isoform_length=4674;expected_accuracy=0.998<br>gnl BL_ORD_ID 19887      cb938_c12/f1p0/3486         | 1   | 2629 | 2627 | 3772 | 112  | 2737 | 3514 | 4659 |
| cb938_c15/f1p0/3219                                                                                                                             | isoform=cb938_c12;full_length_coverage=1;non_full_length_coverage=0;isoform_length=3486;expected_accuracy=0.996<br>gnl BL_ORD_ID 16681      cb8564_c54233/f1p1/3194      | 1   | 2546 | 2541 | 3181 | 1    | 2568 | 2844 | 3486 |
| cb8564_c45300/f1p4/3014                                                                                                                         | isoform=cb8564_c54233;full_length_coverage=1;non_full_length_coverage=4;isoform_length=3014;expected_accuracy=0.995                                                      | 243 | 3012 | 2    | 246  | 428  | 3194 | 8    | 271  |



|                                                                                                                      |                                                                                                                     |      |      |      |      |      |          |      |          |  |
|----------------------------------------------------------------------------------------------------------------------|---------------------------------------------------------------------------------------------------------------------|------|------|------|------|------|----------|------|----------|--|
| accuracy=0.996                                                                                                       | curacy=0.995                                                                                                        |      |      |      |      |      |          |      |          |  |
| cb13434_c67/f1p0/1520                                                                                                | gnl BL_ORD_ID 52285 cb8564_c116906/f1p1/2461                                                                        | 227  | 1366 | 3    | 227  | 1360 | 250<br>1 | 2    | 226      |  |
| cb8564_c39136/f1p0/3036                                                                                              |                                                                                                                     |      |      |      |      |      |          |      |          |  |
| isoform=cb8564_c39136;full_length_coverage=1;non_full_length_coverage=0;isoform_length=3036;expected_accuracy=0.998  | gnl BL_ORD_ID 55377 cb8564_c39822/f1p0/3306                                                                         | 1    | 2089 | 2085 | 3035 | 1    | 209<br>2 | 2219 | 316<br>9 |  |
| cb99_c7/f1p0/3479                                                                                                    |                                                                                                                     |      |      |      |      |      |          |      |          |  |
| isoform=cb99_c7;full_length_coverage=1;non_full_length_coverage=0;isoform_length=3479;expected_accuracy=0.990        | gnl BL_ORD_ID 59047 cb99_c10/f1p0/4693                                                                              | 144  | 3405 | 1    | 146  | 1335 | 460<br>9 | 17   | 161      |  |
| cb1417_c11/f1p0/3544                                                                                                 |                                                                                                                     |      |      |      |      |      |          |      |          |  |
| isoform=cb1417_c11;full_length_coverage=1;non_full_length_coverage=0;isoform_length=3544;expected_accuracy=0.991     | gnl BL_ORD_ID 61352 cb1417_c6/f1p1/4358                                                                             | 438  | 3544 | 8    | 438  | 1279 | 438<br>7 | 12   | 438      |  |
| cb8564_c36635/f1p0/4030                                                                                              | gnl BL_ORD_ID 14953 cb8564_c34238/f4p1/4317                                                                         |      |      |      |      |      |          |      |          |  |
| isoform=cb8564_c36635;full_length_coverage=1;non_full_length_coverage=0;isoform_length=4030;expected_accuracy=0.998  | isoform=cb8564_c34238;full_length_coverage=4;non_full_length_coverage=1;isoform_length=4317;expected_accuracy=1.000 | 184  | 4030 | 1    | 189  | 326  | 417<br>3 | 2    | 183      |  |
| cb8564_c178226/f1p0/2728                                                                                             |                                                                                                                     |      |      |      |      |      |          |      |          |  |
| isoform=cb8564_c178226;full_length_coverage=1;non_full_length_coverage=0;isoform_length=2728;expected_accuracy=0.998 | gnl BL_ORD_ID 55504 cb8564_c43546/f1p1/3276                                                                         | 1284 | 2715 | 1    | 1288 | 1422 | 285<br>4 | 10   | 131<br>8 |  |
| cb5125_c34/f1p0/1890                                                                                                 | gnl BL_ORD_ID 42296 cb5125_c42/f1p3/2079                                                                            |      |      |      |      |      |          |      |          |  |
|                                                                                                                      | isoform=cb5125_c42;full_length_coverage=1;non_full_length_coverage=3;isoform_length=2079;expected_accuracy=         | 1    | 1145 | 1144 | 1780 | 1    | 1147     | 1339 | 197<br>5 |  |

|                                                                                                                     |                                                                                                                 |                         |    |      |      |      |      |     |      |     |   |   |
|---------------------------------------------------------------------------------------------------------------------|-----------------------------------------------------------------------------------------------------------------|-------------------------|----|------|------|------|------|-----|------|-----|---|---|
| cb8642_c15/f1p1/2588                                                                                                | acy=0.992<br>gnl BL_ORD_ID 18905                                                                                | cb8642_c7/f1p0/3885     |    |      |      |      |      |     |      |     |   |   |
| isoform=cb8642_c15;full_length_coverage=1;non_full_length_coverage=1;isoform_length=2588;expected_accuracy=0.994    | isoform=cb8642_c7;full_length_coverage=1;non_full_length_coverage=0;isoform_length=3885;expected_accuracy=1.000 |                         | 1  | 1515 | 1512 | 2512 | 4    | 152 | 2886 | 388 | 2 | 5 |
| cb560_c8/f1p0/3610                                                                                                  | gnl BL_ORD_ID 45710                                                                                             | cb560_c5/f1p0/4128      |    |      |      |      |      |     |      |     |   |   |
| isoform=cb560_c8;full_length_coverage=1;non_full_length_coverage=0;isoform_length=3610;expected_accuracy=0.995      | isoform=cb560_c5;full_length_coverage=1;non_full_length_coverage=0;isoform_length=4128;expected_accuracy=0.998  |                         | 1  | 2431 | 2429 | 3610 | 1    | 244 | 2926 | 410 | 7 | 7 |
| cb4449_c1/f2p0/3029                                                                                                 | gnl BL_ORD_ID 41957                                                                                             | cb4449_c4/f1p0/3414     |    |      |      |      |      |     |      |     |   |   |
| isoform=cb4449_c1;full_length_coverage=2;non_full_length_coverage=0;isoform_length=3029;expected_accuracy=1.000     | isoform=cb4449_c4;full_length_coverage=1;non_full_length_coverage=0;isoform_length=3414;expected_accuracy=0.996 |                         | 1  | 2505 | 2504 | 3029 | 3    | 250 | 2807 | 333 | 3 | 4 |
| cb10299_c0/f5p0/1323                                                                                                | gnl BL_ORD_ID 48353                                                                                             | cb10299_c7/f1p0/3268    |    |      |      |      |      |     |      |     |   |   |
| isoform=cb10299_c0;full_length_coverage=5;non_full_length_coverage=0;isoform_length=1323;expected_accuracy=0.999    |                                                                                                                 |                         | 99 | 1323 | 1    | 102  | 2035 | 326 | 10   | 107 | 0 |   |
| cb8564_c44698/f1p5/2843                                                                                             | gnl BL_ORD_ID 55291                                                                                             | cb8564_c37409/f1p0/3153 |    |      |      |      |      |     |      |     |   |   |
| isoform=cb8564_c44698;full_length_coverage=1;non_full_length_coverage=5;isoform_length=2843;expected_accuracy=0.997 |                                                                                                                 |                         | 1  | 2516 | 2511 | 2825 | 1    | 250 | 2628 | 294 | 7 | 8 |
| cb2206_c10/f1p0/2608                                                                                                | gnl BL_ORD_ID 36912                                                                                             | cb2206_c7/f1p0/2717     |    |      |      |      |      |     |      |     |   |   |
|                                                                                                                     | isoform=cb2206_c7;full_length_coverage=1;non_full_length_coverage=0;isoform_length=2717;expected_accuracy=0.997 |                         | 1  | 2059 | 2059 | 2605 | 1    | 205 | 2161 | 270 | 5 | 7 |
| cb12698_c19/f1p4/1796                                                                                               | gnl BL_ORD_ID 21291                                                                                             | cb9797_c33/f1p1/2260    |    |      |      |      |      |     |      |     |   |   |
|                                                                                                                     |                                                                                                                 |                         | 1  | 1262 | 1259 | 1754 | 21   | 128 | 1766 | 225 |   |   |

|                                                                                                                      |                                                                                                                     |      |      |      |      |      |      |      |      |   |
|----------------------------------------------------------------------------------------------------------------------|---------------------------------------------------------------------------------------------------------------------|------|------|------|------|------|------|------|------|---|
|                                                                                                                      | isoform=cb9797_c33;full_length_coverage=1;non_full_length_coverage=1;isoform_length=2260;expected_accuracy=0.995    |      |      |      |      |      |      | 7    |      | 9 |
| cb8564_c186356/f1p0/2744                                                                                             | gnl BL_ORD_ID 16369      cb8564_c52191/f1p0/2822                                                                    |      |      |      |      |      |      |      |      |   |
| isoform=cb8564_c186356;full_length_coverage=1;non_full_length_coverage=0;isoform_length=2744;expected_accuracy=0.998 | isoform=cb8564_c52191;full_length_coverage=1;non_full_length_coverage=0;isoform_length=2822;expected_accuracy=0.997 | 1393 | 2744 | 132  | 1396 | 1468 | 2819 | 84   | 1348 |   |
| cb2737_c57/f1p0/2959                                                                                                 | gnl BL_ORD_ID 36735      cb2737_c13/f1p0/3105                                                                       |      |      |      |      |      |      |      |      |   |
| isoform=cb2737_c13;full_length_coverage=1;non_full_length_coverage=0;isoform_length=3105;expected_accuracy=0.995     | isoform=cb2737_c13;full_length_coverage=1;non_full_length_coverage=0;isoform_length=3105;expected_accuracy=0.995    | 1    | 1609 | 1607 | 2862 | 69   | 1676 | 1808 | 3066 |   |
| cb3366_c9/f1p1/2799                                                                                                  | gnl BL_ORD_ID 39487      cb3366_c10/f1p0/2875                                                                       |      |      |      |      |      |      |      |      |   |
| isoform=cb3366_c9;full_length_coverage=1;non_full_length_coverage=1;isoform_length=2799;expected_accuracy=0.996      | isoform=cb3366_c10;full_length_coverage=1;non_full_length_coverage=0;isoform_length=2875;expected_accuracy=0.996    | 1    | 1619 | 1618 | 2730 | 8    | 1624 | 1764 | 2875 |   |
| cb322_c45/f1p0/3654                                                                                                  | gnl BL_ORD_ID 40328      cb322_c11/f1p1/4829                                                                        |      |      |      |      |      |      |      |      |   |
| isoform=cb322_c11;full_length_coverage=1;non_full_length_coverage=1;isoform_length=4829;expected_accuracy=0.990      | isoform=cb322_c11;full_length_coverage=1;non_full_length_coverage=1;isoform_length=4829;expected_accuracy=0.990     | 1    | 2715 | 2715 | 3645 | 75   | 2801 | 3133 | 4065 |   |
| cb1956_c14/f1p0/2988                                                                                                 |                                                                                                                     |      |      |      |      |      |      |      |      |   |
| isoform=cb1956_c14;full_length_coverage=1;non_full_length_coverage=0;isoform_length=2988;expected_accuracy=0.998     | gnl BL_ORD_ID 66540      cb1956_c20/f1p0/3189                                                                       | 1    | 2566 | 2571 | 2988 | 20   | 2607 | 2744 | 3157 |   |
| cb6365_c0/f5p2/1956                                                                                                  |                                                                                                                     |      |      |      |      |      |      |      |      |   |
| isoform=cb6365_c0;full_length_coverage=5;non_full_length_coverage=2;isoform_length=1956;expected_accuracy=0.998      | gnl BL_ORD_ID 49656      cb6365_c14/f1p0/2471                                                                       | 115  | 1956 | 1    | 119  | 247  | 2087 | 1    | 119  |   |

|                         |                                                                                                                                                                    |     |      |      |      |     |     |      |     |   |
|-------------------------|--------------------------------------------------------------------------------------------------------------------------------------------------------------------|-----|------|------|------|-----|-----|------|-----|---|
| acy=0.998               |                                                                                                                                                                    |     |      |      |      |     |     |      |     |   |
| cb8564_c36242/f1p0/3335 | gnl BL_ORD_ID 55939 cb8564_c49630/f1p4/3487                                                                                                                        | 2   | 2918 | 2918 | 3168 | 1   | 291 | 3243 | 349 | 3 |
| cb4807_c10/f1p0/3240    | gnl BL_ORD_ID 44272 cb4807_c19/f1p0/3259<br>isoform=cb4807_c19;full_length_coverage=1;non_full_length_coverage=0;isoform_length=3259;expected_accuracy=0.995       | 403 | 3196 | 50   | 404  | 462 | 325 | 1    | 355 | 9 |
| cb14757_c8/f1p0/1464    | gnl BL_ORD_ID 64268 cb14757_c4/f1p0/1874                                                                                                                           | 401 | 1392 | 5    | 403  | 891 | 188 | 25   | 423 | 2 |
| cb8564_c44005/f1p0/3815 | gnl BL_ORD_ID 14247 cb8564_c45575/f3p6/4033<br>isoform=cb8564_c44005;full_length_coverage=1;non_full_length_coverage=0;isoform_length=3815;expected_accuracy=0.993 | 1   | 2046 | 2041 | 3815 | 48  | 210 | 2205 | 398 | 5 |
| cb5659_c78/f1p0/2309    | gnl BL_ORD_ID 45302 cb5659_c105/f4p0/2776<br>isoform=cb5659_c105;full_length_coverage=4;non_full_length_coverage=0;isoform_length=2776;expected_accuracy=1.000     | 1   | 1676 | 1675 | 2127 | 52  | 174 | 2319 | 277 | 5 |
| cb4674_c26/f1p1/3006    | gnl BL_ORD_ID 43463 cb4674_c77/f1p2/3189<br>isoform=cb4674_c26;full_length_coverage=1;non_full_length_coverage=1;isoform_length=3006;expected_accuracy=0.995       | 1   | 2331 | 2330 | 2987 | 83  | 239 | 2533 | 318 | 2 |
| cb8564_c38979/f1p0/2930 | gnl BL_ORD_ID 56029 cb8564_c52782/f1p2/3327<br>isoform=cb8564_c38979;full_length_coverage=1;non_full_length_coverage=0;isoform_length=2930;expected_accuracy=0.996 | 310 | 2930 | 6    | 309  | 618 | 323 | 11   | 289 | 7 |
| cb510_c2/f2p0/3807      | gnl BL_ORD_ID 72263 cb510_c18/f1p0/3980                                                                                                                            | 1   | 2524 | 2523 | 3797 | 16  | 253 | 2638 | 390 |   |

|                                                                                                                                                 |                                              |    |      |      |      |    |      |      |      |
|-------------------------------------------------------------------------------------------------------------------------------------------------|----------------------------------------------|----|------|------|------|----|------|------|------|
| isoform=cb510_c2;full_length_coverage=2;non_full_length_coverage=0;isoform_length=3807;expected_accuracy=0.993<br>cb8564_c119852/f1p0/2378      |                                              |    |      |      |      |    |      | 8    | 9    |
| isoform=cb8564_c119852;full_length_coverage=1;non_full_length_coverage=0;isoform_length=2378;expected_accuracy=1.000<br>cb4674_c38/f1p2/3131    | gnl BL_ORD_ID 52412 cb8564_c122038/f1p0/2819 | 13 | 1662 | 1661 | 2378 | 28 | 1677 | 1798 | 2516 |
| cb3270_c4/f1p2/3142                                                                                                                             | gnl BL_ORD_ID 72844 cb4674_c33/f1p3/3281     | 14 | 2231 | 2229 | 3083 | 3  | 2220 | 2382 | 3237 |
| isoform=cb3270_c4;full_length_coverage=1;non_full_length_coverage=2;isoform_length=3142;expected_accuracy=0.999<br>cb11186_c0/f2p0/1697         | gnl BL_ORD_ID 41534 cb3270_c3/f1p0/3673      |    |      |      |      |    |      |      |      |
| isoform=cb3270_c3;full_length_coverage=1;non_full_length_coverage=0;isoform_length=3673;expected_accuracy=0.997<br>cb11186_c0/f2p0/1697         | gnl BL_ORD_ID 10 cb11186_c1/f1p0/2372        | 1  | 1673 | 1670 | 3038 | 23 | 1698 | 2302 | 3671 |
| isoform=cb11186_c1;full_length_coverage=1;non_full_length_coverage=0;isoform_length=2372;expected_accuracy=0.992<br>cb12714_c29/f1p2/1583       | gnl BL_ORD_ID 13063 cb8564_c179457/f1p0/2647 |    |      |      |      |    |      |      |      |
| isoform=cb8564_c179457;full_length_coverage=1;non_full_length_coverage=0;isoform_length=2647;expected_accuracy=1.000<br>cb8564_c23232/f1p3/2540 | gnl BL_ORD_ID 54246 cb8564_c21138/f1p3/2652  | 1  | 1296 | 1293 | 1597 | 1  | 1275 | 2342 | 2646 |
| cb4367_c10/f1p1/1298                                                                                                                            | gnl BL_ORD_ID 13063 cb8564_c179457/f1p0/2647 |    |      |      |      |    |      |      |      |
| isoform=cb4367_c10;full_length_coverage=1;non_full_length_coverage=1;isoform_length=1298;expected_accuracy=0.999<br>cb4367_c10/f1p1/1298        | gnl BL_ORD_ID 42901 cb4367_c3/f1p1/2058      | 16 | 2172 | 2167 | 2508 | 5  | 2157 | 2259 | 2600 |
| isoform=cb4367_c3;full_length_coverage=1;non_full_length_coverage=1;isoform_length=2058;expected_accuracy=0.999                                 | gnl BL_ORD_ID 42901 cb4367_c3/f1p1/2058      | 1  | 1129 | 1126 | 1298 | 20 | 1140 | 1559 | 1730 |

|                                                                                                                                                        |                                                                                                                                                                               |     |      |      |      |      |          |      |          |
|--------------------------------------------------------------------------------------------------------------------------------------------------------|-------------------------------------------------------------------------------------------------------------------------------------------------------------------------------|-----|------|------|------|------|----------|------|----------|
| racy=0.995<br>cb2629_c15/f1p0/2175<br>isoform=cb2629_c15;full_length_coverage=1;non_full_length_coverage=0;isoform_length=2175;expected_accuracy=0.991 | cy=0.991<br>gnl BL_ORD_ID 34935      cb18639_c0/f2p0/5077<br>isoform=cb18639_c0;full_length_coverage=2;non_full_length_coverage=0;isoform_length=5077;expected_accuracy=0.998 | 1   | 1663 | 1662 | 2175 | 2572 | 424<br>0 | 4351 | 486<br>4 |
| cb3750_c6/f2p0/2746<br>isoform=cb3750_c6;full_length_coverage=2;non_full_length_coverage=0;isoform_length=2746;expected_accuracy=0.999                 | gnl BL_ORD_ID 40301      cb3750_c20/f1p3/3049<br>isoform=cb3750_c20;full_length_coverage=1;non_full_length_coverage=3;isoform_length=3049;expected_accuracy=0.992             | 1   | 2052 | 2054 | 2739 | 29   | 209<br>2 | 2362 | 304<br>9 |
| cb4016_c32/f1p0/1913                                                                                                                                   | gnl BL_ORD_ID 41579      cb4016_c30/f1p1/3132<br>isoform=cb4016_c30;full_length_coverage=1;non_full_length_coverage=1;isoform_length=3132;expected_accuracy=0.994             | 191 | 1930 | 23   | 194  | 1297 | 303<br>7 | 683  | 859      |
| cb781_c33/f1p0/1887                                                                                                                                    | gnl BL_ORD_ID 9056      cb781_c29/f1p0/2108<br>isoform=cb781_c29;full_length_coverage=1;non_full_length_coverage=0;isoform_length=2108;expected_accuracy=0.993                | 1   | 1330 | 1330 | 1861 | 23   | 135<br>2 | 1457 | 198<br>6 |
| cb16550_c1/f1p2/1845<br>isoform=cb16550_c1;full_length_coverage=1;non_full_length_coverage=2;isoform_length=1845;expected_accuracy=0.999               | gnl BL_ORD_ID 53316      cb8564_c121927/f1p0/2410                                                                                                                             | 1   | 1212 | 1207 | 1833 | 94   | 130<br>0 | 1523 | 214<br>3 |
| cb5583_c0/f4p0/1845<br>isoform=cb5583_c0;full_length_coverage=4;non_full_length_coverage=0;isoform_length=1845;expected_accuracy=1.000                 | gnl BL_ORD_ID 74103      cb5583_c2/f1p0/2107                                                                                                                                  | 132 | 1772 | 1    | 132  | 422  | 206<br>0 | 1    | 132      |
| cb8564_c41162/f1p0/3158                                                                                                                                | gnl BL_ORD_ID 12440      cb8564_c130435/f1p3/3226                                                                                                                             | 11  | 2553 | 2548 | 3042 | 13   | 257      | 2711 | 321      |

|                         |                                                                                                                                                                         |     |      |      |      |     |      |      |      |
|-------------------------|-------------------------------------------------------------------------------------------------------------------------------------------------------------------------|-----|------|------|------|-----|------|------|------|
|                         | isoform=cb8564_c130435;full_length_coverage=1;non_full_length_coverage=3;isoform_length=3226;expected_accuracy=0.994                                                    |     |      |      |      |     |      | 8    | 4    |
| cb8564_c15653/f1p4/2475 | gnl BL_ORD_ID 17272      cb8564_c91851/f1p1/2644<br>isoform=cb8564_c91851;full_length_coverage=1;non_full_length_coverage=1;isoform_length=2644;expected_accuracy=0.993 | 14  | 2294 | 2289 | 2428 | 26  | 2287 | 2505 | 2644 |
| cb9313_c5/f1p0/1570     | gnl BL_ORD_ID 20100      cb9313_c0/f2p0/1947<br>isoform=cb9313_c0;full_length_coverage=2;non_full_length_coverage=0;isoform_length=1947;expected_accuracy=0.999         | 183 | 1583 | 60   | 184  | 436 | 1836 | 32   | 156  |
| cb2550_c6/f1p0/1894     | gnl BL_ORD_ID 38963      cb2550_c9/f8p1/2373<br>isoform=cb2550_c9;full_length_coverage=8;non_full_length_coverage=1;isoform_length=2373;expected_accuracy=1.000         | 1   | 1401 | 1397 | 1897 | 57  | 1460 | 1824 | 2321 |
| cb8564_c4178/f1p0/2685  | gnl BL_ORD_ID 18914      cb8564_c972/f3p0/2746<br>isoform=cb8564_c972;full_length_coverage=3;non_full_length_coverage=0;isoform_length=2746;expected_accuracy=0.999     | 16  | 1983 | 1979 | 2503 | 153 | 2115 | 2223 | 2746 |
| cb7849_c36/f57p2/2251   | isoform=cb7849_c36;full_length_coverage=57;non_full_length_coverage=2;isoform_length=2251;expected_accuracy=1.000                                                       |     |      |      |      |     |      |      |      |
|                         | gnl BL_ORD_ID 51569      cb7849_c16/f1p1/3573                                                                                                                           | 1   | 1328 | 1327 | 2250 | 17  | 1345 | 2622 | 3544 |
| cb454_c24/f1p0/2537     | gnl BL_ORD_ID 43127      cb454_c39/f1p0/2534<br>isoform=cb454_c39;full_length_coverage=1;non_full_length_coverage=0;isoform_length=2534;expected_accuracy=0.999         | 225 | 2275 | 1    | 224  | 488 | 2534 | 158  | 381  |

|                                                                                                                      |                                                                                                                                                              |     |      |      |      |     |          |      |          |  |
|----------------------------------------------------------------------------------------------------------------------|--------------------------------------------------------------------------------------------------------------------------------------------------------------|-----|------|------|------|-----|----------|------|----------|--|
|                                                                                                                      | cy=1.000                                                                                                                                                     |     |      |      |      |     |          |      |          |  |
| cb4128_c19/f1p0/2260                                                                                                 | gnl BL_ORD_ID 71807 cb4128_c11/f1p0/3379                                                                                                                     | 1   | 1761 | 1760 | 2263 | 70  | 183<br>0 | 2166 | 266<br>9 |  |
| cb8564_c182028/f1p0/2513                                                                                             |                                                                                                                                                              |     |      |      |      |     |          |      |          |  |
| isoform=cb8564_c182028;full_length_coverage=1;non_full_length_coverage=0;isoform_length=2513;expected_accuracy=0.996 | gnl BL_ORD_ID 54611 cb8564_c127997/f1p3/2802                                                                                                                 | 1   | 1971 | 1968 | 2513 | 1   | 197<br>2 | 2116 | 266<br>1 |  |
| cb3307_c38/f1p0/2373                                                                                                 | gnl BL_ORD_ID 39617 cb3307_c21/f1p0/2162<br>isoform=cb3307_c21;full_length_coverage=1;non_full_length_coverage=0;isoform_length=2162;expected_accuracy=0.995 | 135 | 2020 | 1    | 137  | 278 | 216<br>2 | 4    | 140      |  |
| cb8422_c7/f1p0/2132                                                                                                  | gnl BL_ORD_ID 11122 cb8422_c8/f1p0/2339<br>isoform=cb8422_c8;full_length_coverage=1;non_full_length_coverage=0;isoform_length=2339;expected_accuracy=0.993   | 1   | 1480 | 1480 | 2144 | 37  | 151<br>2 | 1674 | 233<br>9 |  |
| cb11067_c13/f1p0/1371                                                                                                |                                                                                                                                                              |     |      |      |      |     |          |      |          |  |
| isoform=cb11067_c13;full_length_coverage=1;non_full_length_coverage=0;isoform_length=1371;expected_accuracy=0.993    | gnl BL_ORD_ID 49138 cb11067_c12/f1p0/1497                                                                                                                    | 1   | 1177 | 1176 | 1325 | 74  | 125<br>0 | 1359 | 150<br>8 |  |
| cb1334_c12/f1p0/6575                                                                                                 | gnl BL_ORD_ID 61264 cb1334_c10/f1p0/6801                                                                                                                     | 388 | 6210 | 12   | 392  | 512 | 633<br>4 | 1    | 382      |  |
| cb1955_c24/f1p0/2186                                                                                                 | gnl BL_ORD_ID 36339 cb1955_c43/f2p0/2634<br>isoform=cb1955_c43;full_length_coverage=2;non_full_length_coverage=0;isoform_length=2634;expected_accuracy=1.000 | 1   | 1479 | 1479 | 2186 | 101 | 157<br>9 | 1902 | 261<br>0 |  |
| cb2818_c78/f1p0/2043                                                                                                 | gnl BL_ORD_ID 68900 cb2818_c40/f1p0/3487                                                                                                                     | 1   | 1936 | 1935 | 2041 | 961 | 289      | 3288 | 339      |  |



|                                                                                                                                          |                                                                                                                                                                    |     |      |      |      |      |          |      |  |          |
|------------------------------------------------------------------------------------------------------------------------------------------|--------------------------------------------------------------------------------------------------------------------------------------------------------------------|-----|------|------|------|------|----------|------|--|----------|
| isoform=cb2818_c78;full_length_coverage=1;non_full_length_coverage=0;isoform_length=2043;expected_accuracy=0.992                         |                                                                                                                                                                    |     |      |      |      |      |          | 3    |  | 5        |
| cb13753_c0/f1p0/1755                                                                                                                     | gnl BL_ORD_ID 71489 cb3759_c8/f1p0/3290                                                                                                                            | 377 | 1707 | 8    | 378  | 1864 | 319<br>2 | 6    |  | 374      |
| cb781_c7/f1p0/2984                                                                                                                       | gnl BL_ORD_ID 49464 cb781_c6/f1p1/4637                                                                                                                             | 113 | 3008 | 1    | 115  | 277  | 319<br>3 | 63   |  | 177      |
| cb8564_c76041/f1p0/1893                                                                                                                  | gnl BL_ORD_ID 18863 cb8564_c82439/f1p4/3856<br>isoform=cb8564_c82439;full_length_coverage=1;non_full_length_coverage=4;isoform_length=3856;expected_accuracy=0.997 | 306 | 1675 | 31   | 308  | 2343 | 370<br>7 | 1    |  | 276      |
| cb1333_c96/f1p0/1554<br>isoform=cb1333_c96;full_length_coverage=1;non_full_length_coverage=0;isoform_length=1554;expected_accuracy=0.991 | gnl BL_ORD_ID 61259 cb1333_c109/f1p0/5379                                                                                                                          | 143 | 1554 | 13   | 142  | 3498 | 4911     | 17   |  | 146      |
| cb2176_c1/f2p2/3618<br>isoform=cb2176_c1;full_length_coverage=2;non_full_length_coverage=2;isoform_length=3618;expected_accuracy=1.000   | gnl BL_ORD_ID 34486 cb2176_c4/f1p1/3759<br>isoform=cb2176_c4;full_length_coverage=1;non_full_length_coverage=1;isoform_length=3759;expected_accuracy=0.994         | 442 | 3612 | 97   | 439  | 610  | 375<br>9 | 147  |  | 488      |
| cb7504_c3/f1p0/1972<br>isoform=cb7504_c3;full_length_coverage=1;non_full_length_coverage=0;isoform_length=1972;expected_accuracy=0.995   | gnl BL_ORD_ID 7872 cb7504_c10/f4p0/2301<br>isoform=cb7504_c10;full_length_coverage=4;non_full_length_coverage=0;isoform_length=2301;expected_accuracy=0.993        | 1   | 1003 | 1005 | 1972 | 5    | 101<br>3 | 1299 |  | 226<br>8 |
| cb6730_c26/f1p1/2468<br>isoform=cb6730_c26;full_length_coverage=1;non_full_length_coverage=1;isoform_length=2468;expected_accuracy=0.997 | gnl BL_ORD_ID 3442 cb6730_c30/f4p0/2653<br>isoform=cb6730_c30;full_length_coverage=4;non_full_length_coverage=0;isoform_length=2653;expected_accuracy=0.997        | 1   | 1841 | 1842 | 2431 | 41   | 188<br>3 | 2064 |  | 265<br>3 |

|                         |                                                                                                                                                                         |      |      |      |      |      |      |      |      |  |  |
|-------------------------|-------------------------------------------------------------------------------------------------------------------------------------------------------------------------|------|------|------|------|------|------|------|------|--|--|
| racy=0.998              | acy=1.000                                                                                                                                                               |      |      |      |      |      |      |      |      |  |  |
| cb8564_c35300/f1p2/3912 | gnl BL_ORD_ID 14953      cb8564_c34238/f4p1/4317<br>isoform=cb8564_c34238;full_length_coverage=4;non_full_length_coverage=1;isoform_length=4317;expected_accuracy=1.000 | 185  | 3922 | 1    | 187  | 427  | 4165 | 1    | 179  |  |  |
| cb1931_c1/f1p0/2305     | gnl BL_ORD_ID 34818      cb1931_c0/f1p0/4121<br>isoform=cb1931_c1;full_length_coverage=1;non_full_length_coverage=0;isoform_length=2305;expected_accuracy=1.000         | 1    | 1914 | 1909 | 2305 | 66   | 1978 | 3706 | 4101 |  |  |
| cb8564_c20202/f1p0/2556 | gnl BL_ORD_ID 14672      cb8564_c31831/f7p0/2817<br>isoform=cb8564_c20202;full_length_coverage=1;non_full_length_coverage=0;isoform_length=2556;expected_accuracy=0.999 | 1    | 2227 | 2224 | 2556 | 56   | 2300 | 2464 | 2786 |  |  |
| cb3290_c38/f1p0/2345    | gnl BL_ORD_ID 71041      cb3290_c116/f1p0/3359                                                                                                                          | 1150 | 2331 | 1    | 1151 | 1629 | 2810 | 322  | 1472 |  |  |
| cb8564_c40764/f1p0/2563 | gnl BL_ORD_ID 55433      cb8564_c41572/f1p1/3265                                                                                                                        | 1    | 2167 | 2162 | 2563 | 1    | 2157 | 2363 | 2761 |  |  |
| cb8564_c39620/f1p0/2913 | gnl BL_ORD_ID 56643      cb8564_c50449/f1p0/3504                                                                                                                        | 2    | 2112 | 2111 | 2852 | 3    | 2113 | 2745 | 3486 |  |  |
| cb1955_c21/f1p1/2842    | gnl BL_ORD_ID 66532      cb1955_c22/f1p2/3580                                                                                                                           | 1    | 2568 | 2569 | 2840 | 2    | 2568 | 3343 | 3617 |  |  |

|                                                                                                                     |                                                                                                                     |                         |      |      |      |      |      |      |      |      |
|---------------------------------------------------------------------------------------------------------------------|---------------------------------------------------------------------------------------------------------------------|-------------------------|------|------|------|------|------|------|------|------|
| racy=0.995                                                                                                          |                                                                                                                     |                         |      |      |      |      |      |      |      |      |
| cb453_c25/f17p1/2265                                                                                                | gnl BL_ORD_ID 42376                                                                                                 | cb453_c6/f1p0/4805      |      |      |      |      |      |      |      |      |
| isoform=cb453_c25;full_length_coverage=17;non_full_length_coverage=1;isoform_length=2265;expected_accuracy=1.000    | isoform=cb453_c6;full_length_coverage=1;non_full_length_coverage=0;isoform_length=4805;expected_accuracy=0.997      |                         | 616  | 2265 | 66   | 618  | 3155 | 4805 | 1    | 552  |
| cb7404_c15/f1p0/2068                                                                                                | gnl BL_ORD_ID 51201                                                                                                 | cb7404_c23/f1p1/2352    | 1    | 1292 | 1289 | 2071 | 6    | 1297 | 1441 | 2223 |
| cb8564_c15653/f1p4/2475                                                                                             | gnl BL_ORD_ID 54329                                                                                                 | cb8564_c22496/f4p7/2826 | 1    | 2293 | 2289 | 2478 | 1    | 2293 | 2512 | 2701 |
| cb3939_c29/f1p0/2382                                                                                                | gnl BL_ORD_ID 39237                                                                                                 | cb3939_c13/f1p0/3298    |      |      |      |      |      |      |      |      |
| isoform=cb3939_c13;full_length_coverage=1;non_full_length_coverage=0;isoform_length=3298;expected_accuracy=0.997    | isoform=cb3939_c13;full_length_coverage=1;non_full_length_coverage=0;isoform_length=3298;expected_accuracy=0.997    |                         | 1208 | 2324 | 100  | 1209 | 2148 | 3263 | 78   | 1185 |
| cb4576_c12/f13p3/4007                                                                                               | gnl BL_ORD_ID 72706                                                                                                 | cb4576_c62/f1p0/4079    |      |      |      |      |      |      |      |      |
| isoform=cb4576_c12;full_length_coverage=13;non_full_length_coverage=3;isoform_length=4007;expected_accuracy=0.998   | isoform=cb4576_c62;full_length_coverage=1;non_full_length_coverage=0;isoform_length=4079;expected_accuracy=0.997    |                         | 466  | 3939 | 49   | 464  | 618  | 4091 | 27   | 443  |
| cb3575_c11/f1p0/3124                                                                                                | gnl BL_ORD_ID 40181                                                                                                 | cb3575_c12/f1p0/3408    |      |      |      |      |      |      |      |      |
| isoform=cb3575_c11;full_length_coverage=1;non_full_length_coverage=0;isoform_length=3124;expected_accuracy=0.996    | isoform=cb3575_c12;full_length_coverage=1;non_full_length_coverage=0;isoform_length=3408;expected_accuracy=0.993    |                         | 1    | 2662 | 2662 | 3124 | 8    | 2676 | 2942 | 3408 |
| cb8564_c37361/f1p0/3076                                                                                             | gnl BL_ORD_ID 55410                                                                                                 | cb8564_c40893/f1p0/3594 | 1    | 2481 | 2477 | 3070 | 2    | 2483 | 2901 | 3478 |
| cb8564_c46939/f1p1/2926                                                                                             | gnl BL_ORD_ID 14539                                                                                                 | cb8564_c46562/f2p3/3196 |      |      |      |      |      |      |      |      |
| isoform=cb8564_c46562;full_length_coverage=2;non_full_length_coverage=3;isoform_length=3196;expected_accuracy=0.995 | isoform=cb8564_c46562;full_length_coverage=2;non_full_length_coverage=3;isoform_length=3196;expected_accuracy=0.995 |                         | 10   | 2134 | 2130 | 2870 | 16   | 2168 | 2273 | 3015 |



|                                                                                                                                                                    |                                                                                                                                                                           |      |      |      |      |      |      |      |      |
|--------------------------------------------------------------------------------------------------------------------------------------------------------------------|---------------------------------------------------------------------------------------------------------------------------------------------------------------------------|------|------|------|------|------|------|------|------|
| accuracy=0.996<br>cb8564_c178226/f1p0/2728<br>isoform=cb8564_c178226;full_length_coverage=1;non_full_length_coverage=0;isoform_length=2728;expected_accuracy=0.998 | gnl BL_ORD_ID 55873 cb8564_c47701/f1p0/3144                                                                                                                               | 1284 | 2728 | 12   | 1288 | 1432 | 2878 | 24   | 1328 |
| cb8564_c45699/f1p0/3005                                                                                                                                            | gnl BL_ORD_ID 16879      cb8564_c48606/f1p1/3308<br>isoform=cb8564_c48606;full_length_coverage=1;non_full_length_coverage=1;isoform_length=3308;expected_accuracy=0.998   | 1    | 2133 | 2129 | 2848 | 1    | 2151 | 2587 | 3308 |
| cb1779_c4/f1p0/3691                                                                                                                                                | gnl BL_ORD_ID 31422      cb1779_c11/f1p0/5053<br>isoform=cb1779_c11;full_length_coverage=1;non_full_length_coverage=0;isoform_length=5053;expected_accuracy=0.996         | 1    | 2830 | 2828 | 3673 | 15   | 2836 | 3079 | 3920 |
| cb1371_c19/f1p3/4073                                                                                                                                               | gnl BL_ORD_ID 25357      cb1371_c47/f1p1/5280<br>isoform=cb1371_c47;full_length_coverage=1;non_full_length_coverage=1;isoform_length=5280;expected_accuracy=0.998         | 491  | 4058 | 98   | 496  | 1725 | 5280 | 7    | 393  |
| cb8564_c72937/f1p1/3443                                                                                                                                            | gnl BL_ORD_ID 11744      cb8564_c151271/f2p2/3622<br>isoform=cb8564_c151271;full_length_coverage=2;non_full_length_coverage=2;isoform_length=3622;expected_accuracy=0.991 | 1    | 3086 | 3086 | 3421 | 1    | 3099 | 3281 | 3622 |
| cb8564_c23826/f2p1/3274<br>isoform=cb8564_c23826;full_length_coverage=2;non_full_length_coverage=1;isoform_length=3274;expected_accuracy=0.996                     | gnl BL_ORD_ID 52661 cb8564_c10315/f1p0/4512                                                                                                                               | 432  | 3239 | 62   | 432  | 1609 | 4416 | 1    | 371  |
| cb8564_c41162/f1p0/3158                                                                                                                                            | gnl BL_ORD_ID 55522 cb8564_c44123/f1p1/3230                                                                                                                               | 21   | 2553 | 2548 | 3040 | 16   | 254  | 2679 | 317  |

|                          |                                                                                                                                                                         |     |      |      |      |     |          |      |          |
|--------------------------|-------------------------------------------------------------------------------------------------------------------------------------------------------------------------|-----|------|------|------|-----|----------|------|----------|
|                          |                                                                                                                                                                         |     |      |      |      |     |          | 9    | 1        |
| cb5221_c27/f1p0/3107     | gnl BL_ORD_ID 45742      cb5221_c11/f1p0/3287<br>isoform=cb5221_c11;full_length_coverage=1;non_full_length_coverage=0;isoform_length=3287;expected_accuracy=0.996       | 193 | 3076 | 1    | 194  | 390 | 328<br>7 | 28   | 221      |
| cb8564_c3793/f1p0/2874   | gnl BL_ORD_ID 14097      cb8564_c3797/f2p1/2809<br>isoform=cb8564_c3797;full_length_coverage=2;non_full_length_coverage=1;isoform_length=2809;expected_accuracy=0.996   | 1   | 2399 | 2399 | 2667 | 1   | 239<br>5 | 2541 | 280<br>9 |
| cb8564_c84022/f1p0/2360  | gnl BL_ORD_ID 15835      cb8564_c73664/f5p3/2665<br>isoform=cb8564_c73664;full_length_coverage=5;non_full_length_coverage=3;isoform_length=2665;expected_accuracy=0.994 | 1   | 1561 | 1559 | 2334 | 3   | 157<br>1 | 1707 | 248<br>2 |
| cb12714_c29/f1p2/1583    | gnl BL_ORD_ID 58211      cb8564_c91688/f1p0/2747                                                                                                                        | 1   | 1296 | 1293 | 1542 | 1   | 129<br>5 | 2439 | 268<br>7 |
| cb8564_c42387/f1p4/2973  | isoform=cb8564_c42387;full_length_coverage=1;non_full_length_coverage=4;isoform_length=2973;expected_accuracy=0.993                                                     |     |      |      |      |     |          |      |          |
| cb3406_c5/f1p0/1947      | gnl BL_ORD_ID 55920      cb8564_c48949/f1p0/4357                                                                                                                        | 1   | 2295 | 2296 | 2973 | 2   | 229<br>3 | 2847 | 349<br>7 |
| cb3406_c5/f1p0/1947      | gnl BL_ORD_ID 40557      cb3406_c11/f1p0/2573<br>isoform=cb3406_c11;full_length_coverage=1;non_full_length_coverage=0;isoform_length=1947;expected_accuracy=0.995       | 216 | 1946 | 3    | 211  | 831 | 256<br>0 | 41   | 248      |
| cb8564_c117126/f2p0/2610 | gnl BL_ORD_ID 14626      cb8564_c41734/f1p0/2770<br>isoform=cb8564_c41734;full_length_coverage=1;non_full_length_coverage=0;isoform_length=2610;expected                | 112 | 1476 | 1476 | 2610 | 1   | 136<br>3 | 1632 | 277<br>0 |

|                          |                                                                                                                                                                                        |      |      |      |      |      |      |      |      |
|--------------------------|----------------------------------------------------------------------------------------------------------------------------------------------------------------------------------------|------|------|------|------|------|------|------|------|
| cb8564_c11997/f1p2/2670  | curacy=0.994<br>gnl BL_ORD_ID 9350      cb8564_c11826/f1p0/2916<br>isoform=cb8564_c11826;full_length_coverage=1;non_full_length_coverage=0;isoform_length=2916;expected_accuracy=0.997 | 1294 | 2629 | 1    | 1295 | 1543 | 2878 | 4    | 1296 |
| cb2844_c7/f1p0/2064      | gnl BL_ORD_ID 68936      cb2844_c1/f1p0/2387<br>isoform=cb2844_c7;full_length_coverage=1;non_full_length_coverage=0;isoform_length=2064;expected_accuracy=0.996                        | 298  | 2062 | 40   | 299  | 423  | 2186 | 3    | 262  |
| cb8564_c180116/f1p0/2944 | gnl BL_ORD_ID 15169      cb8564_c40218/f1p0/3146<br>isoform=cb8564_c180116;full_length_coverage=1;non_full_length_coverage=0;isoform_length=2944;expected_accuracy=0.996               | 1    | 2522 | 2520 | 2944 | 1    | 2502 | 2729 | 3146 |
| cb499_c61/f1p0/3335      | gnl BL_ORD_ID 42604      cb499_c4/f4p1/4016<br>isoform=cb499_c4;full_length_coverage=4;non_full_length_coverage=1;isoform_length=4016;expected_accuracy=1.000                          | 1510 | 3363 | 1    | 1513 | 2161 | 4016 | 112  | 1627 |
| cb8564_c4096/f1p0/2104   | gnl BL_ORD_ID 54979      cb8564_c4095/f1p0/4108<br>isoform=cb8564_c4096;full_length_coverage=1;non_full_length_coverage=0;isoform_length=2104;expected_accuracy=1.000                  | 135  | 2091 | 1    | 138  | 2136 | 4091 | 2    | 139  |
| cb4373_c5/f1p0/3315      | gnl BL_ORD_ID 42010      cb4373_c11/f7p0/3421<br>isoform=cb4373_c5;full_length_coverage=1;non_full_length_coverage=0;isoform_length=3315;expected_accuracy=0.999                       | 1    | 2394 | 2394 | 3293 | 1    | 2396 | 2525 | 3421 |
| cb8564_c129820/f1p0/2313 | gnl BL_ORD_ID 18376      cb8564_c7852/f2p0/2668<br>isoform=cb8564_c129820;full_length_coverage=1;non_full_length_coverage=0;isoform_length=2313;expected_accuracy=0.999                | 217  | 2313 | 1    | 218  | 443  | 253  | 34   | 251  |





|                                                                                                                     |                                                                                                                      |                          |      |      |      |      |      |      |      |      |
|---------------------------------------------------------------------------------------------------------------------|----------------------------------------------------------------------------------------------------------------------|--------------------------|------|------|------|------|------|------|------|------|
| _accuracy=0.994                                                                                                     |                                                                                                                      |                          |      |      |      |      |      |      |      |      |
| cb8564_c79084/f1p0/2498                                                                                             | gnl BL_ORD_ID 12051                                                                                                  | cb8564_c147180/f4p0/3043 |      |      |      |      |      |      |      |      |
| isoform=cb8564_c79084;full_length_coverage=1;non_full_length_coverage=0;isoform_length=2498;expected_accuracy=0.991 | isoform=cb8564_c147180;full_length_coverage=4;non_full_length_coverage=0;isoform_length=3043;expected_accuracy=0.998 |                          | 133  | 2498 | 1    | 133  | 654  | 3024 | 1    | 134  |
| cb16776_c24/f1p0/5826                                                                                               | gnl BL_ORD_ID 33586                                                                                                  | cb16776_c21/f1p0/6046    |      |      |      |      |      |      |      |      |
| isoform=cb16776_c24;full_length_coverage=1;non_full_length_coverage=0;isoform_length=5826;expected_accuracy=0.997   | isoform=cb16776_c21;full_length_coverage=1;non_full_length_coverage=0;isoform_length=6046;expected_accuracy=0.997    |                          | 2113 | 5809 | 1    | 2114 | 2354 | 6046 | 141  | 2244 |
| cb14316_c15/f1p0/1874                                                                                               | gnl BL_ORD_ID 15569                                                                                                  | cb8564_c74232/f3p0/2075  |      |      |      |      |      |      |      |      |
| isoform=cb14316_c15;full_length_coverage=1;non_full_length_coverage=0;isoform_length=1874;expected_accuracy=0.999   | isoform=cb8564_c74232;full_length_coverage=3;non_full_length_coverage=0;isoform_length=2075;expected_accuracy=1.000  |                          | 1    | 1228 | 1225 | 1874 | 28   | 1254 | 1374 | 2022 |
| cb8564_c21572/f1p1/3061                                                                                             | gnl BL_ORD_ID 54112                                                                                                  | cb8564_c18776/f1p2/3544  |      |      |      |      |      |      |      |      |
| isoform=cb8564_c21572;full_length_coverage=1;non_full_length_coverage=1;isoform_length=3061;expected_accuracy=0.991 | isoform=cb8564_c18776;full_length_coverage=1;non_full_length_coverage=1;isoform_length=3544;expected_accuracy=0.991  |                          | 1127 | 3061 | 1    | 1125 | 1338 | 3253 | 58   | 1183 |
| cb12972_c5/f2p0/1545                                                                                                | gnl BL_ORD_ID 54792                                                                                                  | cb8564_c2623/f1p1/2475   |      |      |      |      |      |      |      |      |
| isoform=cb12972_c5;full_length_coverage=2;non_full_length_coverage=0;isoform_length=1545;expected_accuracy=1.000    | isoform=cb8564_c2623;full_length_coverage=1;non_full_length_coverage=0;isoform_length=2475;expected_accuracy=1.000   |                          | 206  | 1545 | 9    | 208  | 1051 | 2390 | 1    | 200  |
| cb3290_c38/f1p0/2345                                                                                                | gnl BL_ORD_ID 71037                                                                                                  | cb3290_c60/f1p2/2868     |      |      |      |      |      |      |      |      |
| isoform=cb3290_c38;full_length_coverage=1;non_full_length_coverage=0;isoform_length=2345;expected_accuracy=0.996    | isoform=cb3290_c60;full_length_coverage=1;non_full_length_coverage=0;isoform_length=2868;expected_accuracy=0.996     |                          | 1150 | 2340 | 1    | 1151 | 1593 | 2790 | 280  | 1436 |
| cb8564_c84198/f1p0/2418                                                                                             | gnl BL_ORD_ID 53689                                                                                                  | cb8564_c155515/f1p4/2826 |      |      |      |      |      |      |      |      |
| isoform=cb8564_c84198;full_length_coverage=1;non_full_length_coverage=0;isoform_length=2418;expected_accuracy=0.994 | isoform=cb8564_c155515;full_length_coverage=1;non_full_length_coverage=0;isoform_length=2826;expected_accuracy=0.994 |                          | 1    | 2008 | 2006 | 2428 | 17   | 202  | 2144 | 256  |

|                                                                                                                      |                                              |      |      |      |      |      |      |      |      |
|----------------------------------------------------------------------------------------------------------------------|----------------------------------------------|------|------|------|------|------|------|------|------|
| cb8564_c43399/f1p0/2654                                                                                              |                                              |      |      |      |      |      |      | 7    | 6    |
| isoform=cb8564_c43399;full_length_coverage=1;non_full_length_coverage=0;isoform_length=2654;expected_accuracy=0.999  | gnl BL_ORD_ID 56648 cb8564_c50629/f1p3/2919  | 1    | 2367 | 2363 | 2654 | 4    | 2365 | 2653 | 2944 |
| cb9215_c0/f4p1/1807                                                                                                  |                                              |      |      |      |      |      |      |      |      |
| isoform=cb9215_c0;full_length_coverage=4;non_full_length_coverage=1;isoform_length=1807;expected_accuracy=1.000      | gnl BL_ORD_ID 59585 cb9215_c5/f1p0/2151      | 611  | 1801 | 79   | 612  | 927  | 2116 | 1    | 533  |
| cb316_c22/f1p0/3262                                                                                                  |                                              |      |      |      |      |      |      |      |      |
| isoform=cb316_c22;full_length_coverage=1;non_full_length_coverage=0;isoform_length=3262;expected_accuracy=0.998      | gnl BL_ORD_ID 69554 cb316_c10/f1p2/4819      | 1    | 1609 | 1605 | 3147 | 1096 | 2702 | 3318 | 4861 |
| cb8564_c129638/f1p0/2479                                                                                             |                                              |      |      |      |      |      |      |      |      |
| isoform=cb8564_c129638;full_length_coverage=1;non_full_length_coverage=0;isoform_length=2479;expected_accuracy=0.995 | gnl BL_ORD_ID 54748 cb8564_c163479/f1p2/3022 | 1    | 1627 | 1623 | 2475 | 121  | 1747 | 2152 | 3004 |
| cb12292_c13/f1p0/1000                                                                                                |                                              |      |      |      |      |      |      |      |      |
| isoform=cb12292_c13;full_length_coverage=1;non_full_length_coverage=0;isoform_length=1000;expected_accuracy=0.995    | gnl BL_ORD_ID 23626 cb12292_c9/f1p0/1677     | 151  | 997  | 1    | 147  | 816  | 1674 | 1    | 145  |
| cb8564_c90494/f1p0/2950                                                                                              |                                              |      |      |      |      |      |      |      |      |
| isoform=cb8564_c90494;full_length_coverage=1;non_full_length_coverage=0;isoform_length=2950;expected_accuracy=0.997  | gnl BL_ORD_ID 18436 cb8564_c88865/f1p0/3123  | 347  | 2950 | 4    | 348  | 527  | 3122 | 1    | 362  |
| cb452_c42/f1p0/3142                                                                                                  |                                              |      |      |      |      |      |      |      |      |
| isoform=cb452_c42;full_length_coverage=2;non_full_length_coverage=3;isoform_length=3234;expected_accuracy=0.995      | gnl BL_ORD_ID 43284 cb452_c15/f2p3/3234      | 1492 | 2981 | 1    | 1492 | 1633 | 3123 | 1    | 1495 |

|                                                                                                                      |                                             |     |      |      |      |      |      |      |      |  |
|----------------------------------------------------------------------------------------------------------------------|---------------------------------------------|-----|------|------|------|------|------|------|------|--|
|                                                                                                                      | cy=0.999                                    |     |      |      |      |      |      |      |      |  |
| cb8564_c181853/f1p0/2119                                                                                             |                                             |     |      |      |      |      |      |      |      |  |
| isoform=cb8564_c181853;full_length_coverage=1;non_full_length_coverage=0;isoform_length=2119;expected_accuracy=0.997 | gnl BL_ORD_ID 56641 cb8564_c50309/f1p5/3075 | 1   | 1339 | 1334 | 2113 | 1    | 1340 | 2168 | 2947 |  |
| cb9283_c3/f1p0/2129                                                                                                  | gnl BL_ORD_ID 19600 cb9283_c4/f1p0/3059     |     |      |      |      |      |      |      |      |  |
| isoform=cb9283_c4;full_length_coverage=1;non_full_length_coverage=0;isoform_length=3059;expected_accuracy=0.996      | gnl BL_ORD_ID 19600 cb9283_c4/f1p0/3059     | 1   | 1122 | 1120 | 2010 | 46   | 1165 | 2170 | 3059 |  |
| cb8564_c38947/f1p0/2650                                                                                              |                                             |     |      |      |      |      |      |      |      |  |
| isoform=cb8564_c38947;full_length_coverage=1;non_full_length_coverage=0;isoform_length=2650;expected_accuracy=0.996  | gnl BL_ORD_ID 56601 cb8564_c48153/f1p0/3083 | 1   | 1441 | 1436 | 2650 | 13   | 1448 | 1665 | 2879 |  |
| cb6181_c7/f6p0/2362                                                                                                  | gnl BL_ORD_ID 6168 cb6181_c17/f1p0/2583     |     |      |      |      |      |      |      |      |  |
| isoform=cb6181_c7;full_length_coverage=6;non_full_length_coverage=0;isoform_length=2362;expected_accuracy=1.000      | gnl BL_ORD_ID 6168 cb6181_c17/f1p0/2583     | 1   | 1260 | 1260 | 2362 | 7    | 1269 | 1487 | 2583 |  |
| cb1545_c34/f1p0/3898                                                                                                 | gnl BL_ORD_ID 29257 cb1545_c6/f1p1/3759     |     |      |      |      |      |      |      |      |  |
| isoform=cb1545_c6;full_length_coverage=1;non_full_length_coverage=1;isoform_length=3759;expected_accuracy=0.998      | gnl BL_ORD_ID 29257 cb1545_c6/f1p1/3759     | 1   | 1854 | 1854 | 3486 | 1    | 1855 | 2013 | 3645 |  |
| cb17397_c9/f1p1/1416                                                                                                 | gnl BL_ORD_ID 65805 cb17397_c3/f1p0/2619    | 268 | 1419 | 8    | 268  | 1085 | 2236 | 3    | 263  |  |
| cb2737_c39/f1p0/2866                                                                                                 | gnl BL_ORD_ID 38134 cb2737_c22/f1p0/3196    |     |      |      |      |      |      |      |      |  |
| isoform=cb2737_c22;full_length_coverage=1;non_full_length_coverage=0;isoform_length=3196;expected_accuracy=0.994     | gnl BL_ORD_ID 38134 cb2737_c22/f1p0/3196    | 1   | 1679 | 1677 | 2849 | 98   | 1763 | 1894 | 3045 |  |

|                                                                                                                                                |                                                                                                                                                                               |     |      |      |      |      |          |      |          |
|------------------------------------------------------------------------------------------------------------------------------------------------|-------------------------------------------------------------------------------------------------------------------------------------------------------------------------------|-----|------|------|------|------|----------|------|----------|
| cb6835_c9/f1p3/1996<br>isoform=cb6835_c9;full_length_coverage=1;non_full_length_coverage=3;isoform_length=1996;expected_accuracy=1.000         | acy=0.995<br>gnl BL_ORD_ID 4332      cb6835_c11/f1p2/2231<br>isoform=cb6835_c11;full_length_coverage=1;non_full_length_coverage=2;isoform_length=2231;expected_accuracy=0.998 | 713 | 1915 | 8    | 716  | 1029 | 223<br>1 | 1    | 711      |
| cb8564_c79084/f1p0/2498<br>isoform=cb8564_c79084;full_length_coverage=1;non_full_length_coverage=0;isoform_length=2498;expected_accuracy=0.991 | gnl BL_ORD_ID 18398      cb8564_c90428/f1p0/2987<br>isoform=cb8564_c90428;full_length_coverage=1;non_full_length_coverage=0;isoform_length=2987;expected_accuracy=0.996       | 133 | 2493 | 1    | 133  | 656  | 298<br>7 | 1    | 134      |
| cb7462_c9/f1p0/2569                                                                                                                            | gnl BL_ORD_ID 7881      cb7462_c3/f3p0/2615<br>isoform=cb7462_c3;full_length_coverage=3;non_full_length_coverage=0;isoform_length=2615;expected_accuracy=1.000                | 14  | 1677 | 1675 | 2377 | 1    | 166<br>8 | 1821 | 252<br>3 |
| cb8564_c44698/f1p5/2843<br>isoform=cb8564_c44698;full_length_coverage=1;non_full_length_coverage=5;isoform_length=2843;expected_accuracy=0.997 | gnl BL_ORD_ID 14836      cb8564_c41692/f1p3/2987<br>isoform=cb8564_c41692;full_length_coverage=1;non_full_length_coverage=3;isoform_length=2987;expected_accuracy=0.995       | 1   | 2516 | 2511 | 2826 | 1    | 254<br>4 | 2667 | 298<br>7 |
| cb8564_c44698/f1p5/2843<br>isoform=cb8564_c44698;full_length_coverage=1;non_full_length_coverage=5;isoform_length=2843;expected_accuracy=0.997 | gnl BL_ORD_ID 56641      cb8564_c50309/f1p5/3075                                                                                                                              | 1   | 2516 | 2511 | 2836 | 1    | 251<br>2 | 2633 | 295<br>8 |
| cb12893_c46/f1p0/1118                                                                                                                          | gnl BL_ORD_ID 61928      cb12893_c63/f1p2/1520                                                                                                                                | 275 | 1108 | 3    | 277  | 521  | 136<br>7 | 8    | 280      |
| cb8564_c45864/f1p0/2965                                                                                                                        | gnl BL_ORD_ID 56353      cb8564_c75114/f1p0/2866                                                                                                                              | 16  | 2036 | 2036 | 2582 | 14   | 203<br>5 | 2193 | 273<br>7 |
| cb8564_c51804/f1p1/3590                                                                                                                        | gnl BL_ORD_ID 68032      cb18809_c1/f1p0/5493                                                                                                                                 | 253 | 3494 | 1    | 252  | 2193 | 545      | 8    | 256      |

|                                                                                                                      |                                                                                                                     |                         |      |      |      |      |      |      |      |   |      |   |
|----------------------------------------------------------------------------------------------------------------------|---------------------------------------------------------------------------------------------------------------------|-------------------------|------|------|------|------|------|------|------|---|------|---|
| isoform=cb8564_c51804;full_length_coverage=1;non_full_length_coverage=1;isoform_length=3590;expected_accuracy=0.993  |                                                                                                                     |                         |      |      |      |      |      |      |      | 9 |      |   |
| cb944_c92/f1p0/1128                                                                                                  | gnl BL_ORD_ID 59108                                                                                                 | cb944_c59/f1p1/1752     | 9    | 693  | 688  | 1139 | 508  | 1193 | 1295 |   | 174  | 6 |
| cb8564_c178226/f1p0/2728                                                                                             | gnl BL_ORD_ID 15104                                                                                                 | cb8564_c37866/f1p3/2874 |      |      |      |      |      |      |      |   |      |   |
| isoform=cb8564_c178226;full_length_coverage=1;non_full_length_coverage=0;isoform_length=2728;expected_accuracy=0.998 | isoform=cb8564_c37866;full_length_coverage=1;non_full_length_coverage=3;isoform_length=2874;expected_accuracy=0.990 |                         | 1284 | 2728 | 1    | 1288 | 1405 | 286  | 1    | 5 | 129  | 9 |
| cb8564_c53806/f1p3/3974                                                                                              | gnl BL_ORD_ID 55207                                                                                                 | cb8564_c35399/f1p0/4553 | 172  | 3974 | 1    | 173  | 396  | 418  | 16   | 0 | 179  |   |
| isoform=cb8564_c53806;full_length_coverage=1;non_full_length_coverage=3;isoform_length=3974;expected_accuracy=0.990  |                                                                                                                     |                         |      |      |      |      |      |      |      |   |      |   |
| cb12513_c26/f1p0/1379                                                                                                | gnl BL_ORD_ID 14254                                                                                                 | cb8564_c3885/f1p7/2735  |      |      |      |      |      |      |      |   |      |   |
| isoform=cb12513_c26;full_length_coverage=1;non_full_length_coverage=0;isoform_length=1379;expected_accuracy=0.995    | isoform=cb8564_c3885;full_length_coverage=1;non_full_length_coverage=7;isoform_length=2735;expected_accuracy=0.999  |                         | 254  | 1379 | 26   | 259  | 1490 | 261  | 17   | 5 | 250  |   |
| cb1492_c9/f1p1/2823                                                                                                  | gnl BL_ORD_ID 29080                                                                                                 | cb1492_c0/f4p2/4028     |      |      |      |      |      |      |      |   |      |   |
| isoform=cb1492_c9;full_length_coverage=1;non_full_length_coverage=1;isoform_length=2823;expected_accuracy=1.000      | isoform=cb1492_c0;full_length_coverage=4;non_full_length_coverage=2;isoform_length=4028;expected_accuracy=1.000     |                         | 191  | 2823 | 1    | 196  | 1395 | 402  | 58   | 7 | 253  |   |
| cb2679_c4/f1p0/2896                                                                                                  | gnl BL_ORD_ID 68713                                                                                                 | cb2679_c3/f1p0/3143     | 1    | 2427 | 2424 | 2880 | 4    | 243  | 2660 | 6 | 3116 |   |
| isoform=cb2679_c4;full_length_coverage=1;non_full_length_coverage=0;isoform_length=2896;expected_accuracy=0.995      |                                                                                                                     |                         |      |      |      |      |      |      |      |   |      |   |
| cb1956_c11/f1p0/2868                                                                                                 | gnl BL_ORD_ID 35490                                                                                                 | cb1956_c14/f1p0/2988    | 1    | 1889 | 1889 | 2858 | 43   | 190  | 2009 |   | 298  |   |



|                                                                                                                                         |                                                                                                                                                                      |     |      |      |      |      |      |      |      |
|-----------------------------------------------------------------------------------------------------------------------------------------|----------------------------------------------------------------------------------------------------------------------------------------------------------------------|-----|------|------|------|------|------|------|------|
| isoform=cb4491_c1;full_length_coverage=3;non_full_length_coverage=0;isoform_length=1788;expected_accuracy=1.000<br>cb2737_c63/f1p2/2799 | isoform=cb4491_c3;full_length_coverage=1;non_full_length_coverage=0;isoform_length=1921;expected_accuracy=1.000                                                      |     |      |      |      |      | 0    |      | 1    |
| isoform=cb2737_c63;full_length_coverage=1;non_full_length_coverage=2;isoform_length=2799;expected_accuracy=0.994<br>cb3833_c0/f3p0/1648 | gnl BL_ORD_ID 68785 cb2737_c49/f1p0/3341                                                                                                                             | 109 | 2782 | 1    | 109  | 430  | 3110 | 28   | 137  |
| isoform=cb3833_c0;full_length_coverage=3;non_full_length_coverage=0;isoform_length=1648;expected_accuracy=1.000                         | gnl BL_ORD_ID 71542 cb3833_c1/f1p0/3501                                                                                                                              | 327 | 1648 | 79   | 328  | 1875 | 3196 | 1    | 250  |
| cb8564_c89331/f1p0/2344                                                                                                                 | gnl BL_ORD_ID 12084 cb8564_c146353/f7p2/3353<br>isoform=cb8564_c146353;full_length_coverage=7;non_full_length_coverage=2;isoform_length=3353;expected_accuracy=0.998 | 1   | 2105 | 2101 | 2382 | 114  | 2218 | 3046 | 3329 |
| cb90_c17/f1p1/4529                                                                                                                      | gnl BL_ORD_ID 19781 cb90_c9/f1p0/4970<br>isoform=cb90_c9;full_length_coverage=1;non_full_length_coverage=0;isoform_length=4970;expected_accuracy=0.999               | 350 | 4529 | 21   | 349  | 713  | 4914 | 150  | 479  |
| cb12931_c15/f1p0/1493                                                                                                                   | gnl BL_ORD_ID 13749 cb8564_c185495/f1p0/2805<br>isoform=cb8564_c185495;full_length_coverage=1;non_full_length_coverage=0;isoform_length=2805;expected_accuracy=0.996 | 1   | 1106 | 1104 | 1488 | 1    | 1099 | 2423 | 2805 |
| cb8564_c44698/f1p5/2843                                                                                                                 | gnl BL_ORD_ID 55607 cb8564_c46612/f1p1/3367                                                                                                                          | 1   | 2516 | 2511 | 2830 | 8    | 2518 | 2639 | 2965 |

|                                                                                                                                                                  |                                                                                                                                                                           |     |      |      |      |      |      |      |      |
|------------------------------------------------------------------------------------------------------------------------------------------------------------------|---------------------------------------------------------------------------------------------------------------------------------------------------------------------------|-----|------|------|------|------|------|------|------|
| accuracy=0.997<br>cb8564_c12302/f1p1/2294<br>isoform=cb8564_c12302;full_length_coverage=1;non_full_length_coverage=1;isoform_length=2294;expected_accuracy=0.992 | gnl BL_ORD_ID 12527      cb8564_c15023/f2p0/2552<br>isoform=cb8564_c15023;full_length_coverage=2;non_full_length_coverage=0;isoform_length=2552;expected_accuracy=0.996   | 1   | 1646 | 1646 | 2294 | 30   | 1675 | 1879 | 2529 |
| cb5483_c3/f1p0/2270<br>isoform=cb5483_c3;full_length_coverage=1;non_full_length_coverage=0;isoform_length=2270;expected_accuracy=0.996                           | gnl BL_ORD_ID 73971      cb5483_c7/f1p0/2690                                                                                                                              | 172 | 2270 | 1    | 176  | 502  | 2601 | 26   | 204  |
| cb8564_c82838/f1p1/3447                                                                                                                                          | gnl BL_ORD_ID 16338      cb8564_c53034/f1p2/3495<br>isoform=cb8564_c53034;full_length_coverage=1;non_full_length_coverage=2;isoform_length=3495;expected_accuracy=0.998   | 137 | 3172 | 1    | 141  | 468  | 3495 | 6    | 145  |
| cb8564_c42814/f1p0/2151<br>isoform=cb8564_c42814;full_length_coverage=1;non_full_length_coverage=0;isoform_length=2151;expected_accuracy=0.993                   | gnl BL_ORD_ID 10510      cb8564_c111713/f6p2/3032<br>isoform=cb8564_c111713;full_length_coverage=6;non_full_length_coverage=2;isoform_length=3032;expected_accuracy=0.998 | 650 | 2151 | 7    | 652  | 1333 | 2836 | 1    | 645  |
| cb16315_c1/f1p0/1642<br>isoform=cb16315_c1;full_length_coverage=1;non_full_length_coverage=0;isoform_length=1642;expected_accuracy=0.994                         | gnl BL_ORD_ID 72532      cb4391_c5/f1p0/3162                                                                                                                              | 203 | 1642 | 47   | 206  | 740  | 2180 | 1    | 160  |
| cb9093_c2/f1p0/1840<br>isoform=cb9093_c2;full_length_coverage=1;non_full_length_coverage=0;isoform_length=1840;expected_accuracy=0.996                           | gnl BL_ORD_ID 58549      cb9093_c1/f1p0/2083                                                                                                                              | 1   | 1420 | 1417 | 1840 | 97   | 1514 | 1640 | 2063 |
| cb8564_c125478/f1p1/2270                                                                                                                                         | gnl BL_ORD_ID 12289      cb8564_c122903/f5p2/3949                                                                                                                         | 221 | 2270 | 1    | 222  | 1778 | 382  | 53   | 277  |



|                                                                                                                      |                                                                                                                                                                                         |     |      |      |      |     |     |   |      |     |  |   |
|----------------------------------------------------------------------------------------------------------------------|-----------------------------------------------------------------------------------------------------------------------------------------------------------------------------------------|-----|------|------|------|-----|-----|---|------|-----|--|---|
| isoform=cb8564_c125478;full_length_coverage=1;non_full_length_coverage=1;isoform_length=2270;expected_accuracy=1.000 | isoform=cb8564_c122903;full_length_coverage=5;non_full_length_coverage=2;isoform_length=3949;expected_accuracy=0.998                                                                    |     |      |      |      |     |     |   |      | 9   |  |   |
| cb6277_c13/f1p0/2679                                                                                                 | gnl BL_ORD_ID 3491                      cb6277_c8/f1p0/2793<br>isoform=cb6277_c8;full_length_coverage=1;non_full_length_coverage=0;isoform_length=2793;expected_accuracy=0.999          | 202 | 2576 | 1    | 203  | 419 | 279 | 3 | 115  | 317 |  |   |
| cb6719_c31/f1p0/2434                                                                                                 | gnl BL_ORD_ID 4666                      cb6719_c24/f1p0/2613<br>isoform=cb6719_c31;full_length_coverage=1;non_full_length_coverage=0;isoform_length=2434;expected_accuracy=0.995        | 1   | 1331 | 1330 | 2383 | 91  | 143 | 7 | 1559 | 261 |  | 3 |
| cb2910_c13/f1p0/2551                                                                                                 | gnl BL_ORD_ID 70081   cb2910_c26/f1p0/2855<br>isoform=cb2910_c13;full_length_coverage=1;non_full_length_coverage=0;isoform_length=2551;expected_accuracy=0.998                          | 1   | 1402 | 1402 | 2550 | 99  | 150 | 1 | 1624 | 277 |  | 0 |
| cb8564_c21398/f1p0/3085                                                                                              | gnl BL_ORD_ID 58218   cb8564_c91852/f1p0/3459<br>isoform=cb8564_c21398;full_length_coverage=1;non_full_length_coverage=0;isoform_length=3085;expected_accuracy=0.997                    | 13  | 2362 | 2357 | 3085 | 67  | 241 | 2 | 2606 | 333 |  | 4 |
| cb8564_c38035/f1p0/2770                                                                                              | gnl BL_ORD_ID 15428                      cb8564_c42387/f1p4/2973<br>isoform=cb8564_c42387;full_length_coverage=1;non_full_length_coverage=4;isoform_length=2973;expected_accuracy=0.993 | 1   | 2035 | 2033 | 2700 | 1   | 204 | 2 | 2233 | 291 |  | 3 |
| cb2209_c62/f1p0/2619                                                                                                 | gnl BL_ORD_ID 38726                      cb2209_c11/f1p1/2823<br>isoform=cb2209_c11;full_length_coverage=1;non_full_length_coverage=1;isoform_length=2823;expected_accuracy=0.998       | 2   | 2083 | 2082 | 2461 | 223 | 230 | 1 | 2452 | 282 |  | 2 |

|                         |                                                                                                                                                                                              |      |      |      |      |      |      |      |      |
|-------------------------|----------------------------------------------------------------------------------------------------------------------------------------------------------------------------------------------|------|------|------|------|------|------|------|------|
| cb5001_c11/f1p0/2067    | acy=1.000<br>gnl BL_ORD_ID 43049                      cb5001_c2/f4p3/3059<br>isoform=cb5001_c2;full_length_coverage=4;non_full_length_coverage=3;isoform_length=3059;expected_accuracy=1.000 | 1    | 1585 | 1580 | 2073 | 77   | 1660 | 2436 | 2929 |
| cb8564_c47522/f1p0/2954 | gnl BL_ORD_ID 14410                      cb8564_c44256/f1p1/3267<br>isoform=cb8564_c44256;full_length_coverage=1;non_full_length_coverage=1;isoform_length=3267;expected_accuracy=0.995      | 1    | 2132 | 2128 | 2845 | 1    | 2119 | 2553 | 3267 |
| cb8564_c45609/f1p0/3991 | gnl BL_ORD_ID 15822                      cb8564_c50372/f4p2/4090<br>isoform=cb8564_c50372;full_length_coverage=4;non_full_length_coverage=2;isoform_length=4090;expected_accuracy=0.996      | 260  | 3701 | 1    | 260  | 649  | 4090 | 201  | 460  |
| cb8564_c87256/f1p0/2285 | gnl BL_ORD_ID 16383                      cb8564_c75900/f1p3/2677<br>isoform=cb8564_c87256;full_length_coverage=1;non_full_length_coverage=0;isoform_length=2285;expected_accuracy=0.992      | 1    | 1703 | 1700 | 2285 | 239  | 1941 | 2075 | 2664 |
| cb649_c40/f1p0/3326     | gnl BL_ORD_ID 49372                      cb649_c33/f1p0/4079                                                                                                                                 | 12   | 3135 | 3133 | 3349 | 1    | 3124 | 3671 | 3887 |
| cb8564_c70216/f1p0/3183 | gnl BL_ORD_ID 15737                      cb8564_c76570/f1p0/3381<br>isoform=cb8564_c70216;full_length_coverage=1;non_full_length_coverage=0;isoform_length=3183;expected_accuracy=0.998      | 1    | 2594 | 2592 | 3183 | 45   | 2647 | 2789 | 3381 |
| cb938_c17/f1p1/3461     | gnl BL_ORD_ID 21149                      cb938_c5/f2p0/4567<br>isoform=cb938_c17;full_length_coverage=1;non_full_length_coverage=1;isoform_length=3461;expected_accuracy=0.998               | 1153 | 3459 | 1    | 1156 | 2255 | 4567 | 1    | 1155 |

|                                                                                                                                                     |                                                                                                                                                                           |      |      |      |      |      |          |      |          |
|-----------------------------------------------------------------------------------------------------------------------------------------------------|---------------------------------------------------------------------------------------------------------------------------------------------------------------------------|------|------|------|------|------|----------|------|----------|
| acy=0.991<br>cb3235_c2/f2p1/3341<br>isoform=cb3235_c2;full_length_coverage=2;non_full_length_coverage=1;isoform_length=3341;expected_accuracy=0.998 | y=0.998<br>gnl BL_ORD_ID 70995 cb3235_c18/f1p0/3408                                                                                                                       | 1    | 2409 | 2407 | 3261 | 1    | 243<br>1 | 2542 | 339<br>6 |
| cb8564_c42506/f1p0/2909                                                                                                                             | gnl BL_ORD_ID 55361 cb8564_c39566/f1p1/3824                                                                                                                               | 1    | 2203 | 2199 | 2857 | 914  | 3116     | 2986 | 365<br>2 |
| cb12690_c13/f17p1/1862<br>isoform=cb12690_c13;full_length_coverage=17;non_full_length_coverage=1;isoform_length=1862;expected_accuracy=1.000        | gnl BL_ORD_ID 18575      cb8564_c90782/f1p0/2732<br>isoform=cb8564_c90782;full_length_coverage=1;non_full_length_coverage=0;isoform_length=2732;expected_accuracy=0.997   | 1    | 1488 | 1485 | 1860 | 5    | 148<br>9 | 2357 | 273<br>2 |
| cb2758_c4/f2p2/3132<br>isoform=cb2758_c4;full_length_coverage=2;non_full_length_coverage=2;isoform_length=3132;expected_accuracy=1.000              | gnl BL_ORD_ID 69951 cb2758_c13/f1p0/3354                                                                                                                                  | 132  | 3132 | 1    | 133  | 296  | 330<br>1 | 4    | 136      |
| cb1052_c55/f1p0/2730                                                                                                                                | gnl BL_ORD_ID 1191      cb1052_c13/f1p0/4367<br>isoform=cb1052_c13;full_length_coverage=1;non_full_length_coverage=0;isoform_length=4367;expected_accuracy=0.998          | 600  | 2743 | 75   | 600  | 2093 | 423<br>6 | 1    | 526      |
| cb12805_c0/f2p0/1819<br>isoform=cb12805_c0;full_length_coverage=2;non_full_length_coverage=0;isoform_length=1819;expected_accuracy=0.993            | gnl BL_ORD_ID 12334      cb8564_c128068/f1p0/2255<br>isoform=cb8564_c128068;full_length_coverage=1;non_full_length_coverage=0;isoform_length=2255;expected_accuracy=0.995 | 1    | 1035 | 1034 | 1819 | 84   | 1131     | 1301 | 208<br>4 |
| cb8564_c21767/f1p1/2839<br>isoform=cb8564_c21767;full_length_coverage=1;non_full_length_coverage=1;isoform_length=2839;expected_                    | gnl BL_ORD_ID 12866      cb8564_c162614/f1p0/2999<br>isoform=cb8564_c162614;full_length_coverage=1;non_full_length_coverage=0;isoform_length=2999;expected_a              | 1040 | 2788 | 1    | 1040 | 1249 | 299<br>9 | 60   | 1102     |

|                                                                                                                                                          |                                                                                                                                                                                                 |      |      |      |      |      |      |      |      |
|----------------------------------------------------------------------------------------------------------------------------------------------------------|-------------------------------------------------------------------------------------------------------------------------------------------------------------------------------------------------|------|------|------|------|------|------|------|------|
| accuracy=0.996<br>cb6390_c5/f1p0/2067<br>isoform=cb6390_c5;full_length_coverage=1;non_full_length_coverage=0;isoform_length=2067;expected_accuracy=0.994 | ccuracy=0.998<br>gnl BL_ORD_ID 3698                      cb6390_c0/f5p0/2306<br>isoform=cb6390_c0;full_length_coverage=5;non_full_length_coverage=0;isoform_length=2306;expected_accuracy=1.000 | 359  | 2067 | 9    | 360  | 604  | 2306 | 69   | 418  |
| cb6054_c29/f1p0/1952<br>isoform=cb6054_c29;full_length_coverage=1;non_full_length_coverage=0;isoform_length=1952;expected_accuracy=0.991                 | gnl BL_ORD_ID 74836   cb6054_c31/f1p0/2404                                                                                                                                                      | 1    | 1642 | 1638 | 1952 | 109  | 1751 | 1880 | 2194 |
| cb2804_c65/f1p0/3384<br>isoform=cb2804_c65;full_length_coverage=1;non_full_length_coverage=0;isoform_length=3384;expected_accuracy=0.994                 | gnl BL_ORD_ID 38356                      cb2804_c93/f1p0/3636<br>isoform=cb2804_c93;full_length_coverage=1;non_full_length_coverage=0;isoform_length=3636;expected_accuracy=0.991               | 1    | 2471 | 2469 | 3337 | 54   | 2511 | 2771 | 3636 |
| cb8564_c43399/f1p0/2654<br>isoform=cb8564_c43399;full_length_coverage=1;non_full_length_coverage=0;isoform_length=2654;expected_accuracy=0.999           | gnl BL_ORD_ID 15154                      cb8564_c32509/f1p1/2880<br>isoform=cb8564_c32509;full_length_coverage=1;non_full_length_coverage=1;isoform_length=2880;expected_accuracy=0.991         | 11   | 2367 | 2363 | 2628 | 2    | 2392 | 2610 | 2877 |
| cb5307_c9/f1p0/2902                                                                                                                                      | gnl BL_ORD_ID 46362                      cb5307_c22/f2p0/3012<br>isoform=cb5307_c22;full_length_coverage=2;non_full_length_coverage=0;isoform_length=3012;expected_accuracy=0.995               | 1204 | 2887 | 1    | 1204 | 1330 | 3012 | 1    | 1222 |
| cb2700_c10/f1p0/2691<br>isoform=cb2700_c10;full_length_coverage=1;non_full_length_coverage=0;isoform_length=2691;expected_accuracy=0.999                 | gnl BL_ORD_ID 38064                      cb2700_c1/f1p0/2876<br>isoform=cb2700_c1;full_length_coverage=1;non_full_length_coverage=0;isoform_length=2876;expected_accuracy=1.000                 | 1086 | 2691 | 108  | 1086 | 1266 | 2872 | 1    | 980  |
| cb8564_c49090/f1p0/3264                                                                                                                                  | gnl BL_ORD_ID 55195   cb8564_c35170/f1p0/3386                                                                                                                                                   | 567  | 3233 | 71   | 566  | 738  | 339  | 3    | 497  |

|                          |                                                                                                                                                                          |     |      |      |      |      |          |      |          |  |
|--------------------------|--------------------------------------------------------------------------------------------------------------------------------------------------------------------------|-----|------|------|------|------|----------|------|----------|--|
|                          |                                                                                                                                                                          |     |      |      |      |      |          | 9    |          |  |
| cb359_c1/f1p0/4935       | gnl BL_ORD_ID 39413      cb359_c5/f1p0/5076<br>isoform=cb359_c5;full_length_coverage=1;non_full_length_coverage=0;isoform_length=5076;expected_accuracy=0.999            | 10  | 3598 | 3594 | 4219 | 45   | 365<br>2 | 4402 | 503<br>3 |  |
| cb8564_c145672/f9p4/2440 | gnl BL_ORD_ID 14369      cb8564_c37858/f1p0/2999<br>isoform=cb8564_c145672;full_length_coverage=9;non_full_length_coverage=4;isoform_length=2440;expected_accuracy=1.000 | 468 | 2420 | 89   | 469  | 1047 | 299<br>9 | 1    | 379      |  |
| cb2640_c29/f1p0/3441     | gnl BL_ORD_ID 68659      cb2640_c11/f1p0/3319                                                                                                                            | 355 | 3227 | 4    | 356  | 459  | 333<br>1 | 2    | 353      |  |
| cb1163_c15/f1p3/3725     | gnl BL_ORD_ID 23459      cb1163_c11/f2p1/3742<br>isoform=cb1163_c15;full_length_coverage=1;non_full_length_coverage=3;isoform_length=3725;expected_accuracy=0.999        | 1   | 2502 | 2501 | 3618 | 1    | 250<br>4 | 2616 | 374<br>2 |  |
| cb8564_c11528/f1p1/2758  | gnl BL_ORD_ID 14902      cb8564_c42851/f1p1/2963<br>isoform=cb8564_c11528;full_length_coverage=1;non_full_length_coverage=1;isoform_length=2758;expected_accuracy=0.994  | 2   | 2284 | 2283 | 2756 | 108  | 238<br>3 | 2492 | 296<br>3 |  |
| cb2818_c74/f3p0/3087     | gnl BL_ORD_ID 68900      cb2818_c40/f1p0/3487<br>isoform=cb2818_c74;full_length_coverage=3;non_full_length_coverage=0;isoform_length=3087;expected_accuracy=1.000        | 136 | 3087 | 1    | 139  | 426  | 337<br>7 | 8    | 144      |  |
| cb8564_c20499/f3p0/3328  | gnl BL_ORD_ID 55939      cb8564_c49630/f1p4/3487<br>isoform=cb8564_c20499;full_length_coverage=3;non_full_length_coverage=0;isoform_length=3328;expected_                | 2   | 2916 | 2916 | 3166 | 1    | 291<br>3 | 3243 | 349<br>3 |  |

|                                                                                                                                                                  |                                                                                                                                                                         |     |      |      |      |      |          |      |          |
|------------------------------------------------------------------------------------------------------------------------------------------------------------------|-------------------------------------------------------------------------------------------------------------------------------------------------------------------------|-----|------|------|------|------|----------|------|----------|
| accuracy=1.000<br>cb8564_c90494/f1p0/2950<br>isoform=cb8564_c90494;full_length_coverage=1;non_full_length_coverage=0;isoform_length=2950;expected_accuracy=0.997 | gnl BL_ORD_ID 16259      cb8564_c68587/f4p0/3092<br>isoform=cb8564_c68587;full_length_coverage=4;non_full_length_coverage=0;isoform_length=3092;expected_accuracy=1.000 | 347 | 2950 | 60   | 348  | 486  | 308<br>6 | 1    | 301      |
| cb2108_c3/f1p1/3950<br>isoform=cb2108_c3;full_length_coverage=1;non_full_length_coverage=1;isoform_length=3950;expected_accuracy=0.994                           | gnl BL_ORD_ID 34468      cb2108_c4/f1p1/4035<br>isoform=cb2108_c4;full_length_coverage=1;non_full_length_coverage=1;isoform_length=4035;expected_accuracy=0.997         | 1   | 3451 | 3451 | 3832 | 50   | 350<br>1 | 3652 | 403<br>5 |
| cb5487_c1/f2p1/2546<br>isoform=cb5487_c1;full_length_coverage=2;non_full_length_coverage=1;isoform_length=2546;expected_accuracy=0.996                           | gnl BL_ORD_ID 73975      cb5487_c11/f1p0/2702                                                                                                                           | 1   | 1478 | 1478 | 2502 | 4    | 147<br>7 | 1646 | 267<br>1 |
| cb3856_c5/f1p0/2096                                                                                                                                              | gnl BL_ORD_ID 40760      cb3856_c3/f1p0/3507<br>isoform=cb3856_c3;full_length_coverage=1;non_full_length_coverage=0;isoform_length=3507;expected_accuracy=0.998         | 461 | 1952 | 7    | 464  | 2019 | 350<br>7 | 8    | 465      |
| cb8564_c71747/f1p1/2679<br>isoform=cb8564_c71747;full_length_coverage=1;non_full_length_coverage=1;isoform_length=2679;expected_accuracy=0.999                   | gnl BL_ORD_ID 14459      cb8564_c42140/f1p1/3025<br>isoform=cb8564_c42140;full_length_coverage=1;non_full_length_coverage=1;isoform_length=3025;expected_accuracy=0.998 | 1   | 2002 | 1998 | 2673 | 192  | 220<br>8 | 2350 | 302<br>5 |
| cb8564_c43779/f1p0/3021<br>isoform=cb8564_c43779;full_length_coverage=1;non_full_length_coverage=0;isoform_length=3021;expected_accuracy=0.993                   | gnl BL_ORD_ID 55437      cb8564_c41690/f1p1/3409                                                                                                                        | 1   | 2344 | 2345 | 3021 | 1    | 234<br>9 | 2505 | 318<br>0 |
| cb500_c17/f1p0/2323                                                                                                                                              | gnl BL_ORD_ID 41778      cb500_c10/f2p0/3350                                                                                                                            | 1   | 1293 | 1288 | 2323 | 775  | 206      | 2199 | 323      |

|                                                                                                                                                |                                                                                                                                                                        |     |      |      |      |     |      |      |      |   |
|------------------------------------------------------------------------------------------------------------------------------------------------|------------------------------------------------------------------------------------------------------------------------------------------------------------------------|-----|------|------|------|-----|------|------|------|---|
| isoform=cb500_c17;full_length_coverage=1;non_full_length_coverage=0;isoform_length=2323;expected_accuracy=0.997<br>cb8564_c39136/f1p0/3036     | isoform=cb500_c10;full_length_coverage=2;non_full_length_coverage=0;isoform_length=3350;expected_accuracy=0.998<br>gnl BL_ORD_ID 17429      cb8564_c85447/f1p0/3196    |     |      |      |      |     |      | 7    |      | 0 |
| isoform=cb8564_c39136;full_length_coverage=1;non_full_length_coverage=0;isoform_length=3036;expected_accuracy=0.998<br>cb8564_c49562/f1p0/2838 | isoform=cb8564_c85447;full_length_coverage=1;non_full_length_coverage=0;isoform_length=3196;expected_accuracy=0.997<br>gnl BL_ORD_ID 53680   cb8564_c153222/f2p39/3454 | 1   | 2089 | 2085 | 3036 | 3   | 2095 | 2222 | 3195 |   |
| isoform=cb8564_c49562;full_length_coverage=1;non_full_length_coverage=0;isoform_length=2838;expected_accuracy=0.995<br>cb6889_c18/f1p0/2446    | gnl BL_ORD_ID 47747   cb6889_c13/f1p0/2673                                                                                                                             | 317 | 2410 | 68   | 322  | 588 | 2680 | 1    | 255  |   |
| cb5046_c5/f1p0/1852                                                                                                                            | gnl BL_ORD_ID 72089   cb5046_c1/f1p0/3159                                                                                                                              | 1   | 1458 | 1456 | 1842 | 438 | 1898 | 2733 | 3126 |   |
| cb8564_c188097/f1p0/2552                                                                                                                       | gnl BL_ORD_ID 12970      cb8564_c16702/f2p13/2748                                                                                                                      |     |      |      |      |     |      |      |      |   |
| isoform=cb8564_c188097;full_length_coverage=1;non_full_length_coverage=0;isoform_length=2552;expected_accuracy=0.996<br>cb309_c7/f1p2/4109     | isoform=cb8564_c16702;full_length_coverage=2;non_full_length_coverage=13;isoform_length=2748;expected_accuracy=0.998<br>gnl BL_ORD_ID 38927      cb309_c3/f2p2/4443    | 1   | 1945 | 1940 | 2495 | 147 | 2090 | 2193 | 2748 |   |
| isoform=cb309_c7;full_length_coverage=1;non_full_length_coverage=2;isoform_length=4109;expected_accuracy=0.997                                 | isoform=cb309_c3;full_length_coverage=2;non_full_length_coverage=2;isoform_length=4443;expected_accuracy=1.000                                                         | 1   | 3739 | 3740 | 4108 | 2   | 3740 | 4075 | 4443 |   |
| cb8564_c37361/f1p0/3076                                                                                                                        | gnl BL_ORD_ID 55472   cb8564_c42531/f1p0/3996                                                                                                                          | 125 | 2481 | 2477 | 3068 | 816 | 3171 | 3272 | 3863 |   |
| cb8564_c36635/f1p0/4030                                                                                                                        | gnl BL_ORD_ID 16628      cb8564_c47737/f7p5/4351                                                                                                                       | 184 | 4022 | 1    | 189  | 436 | 427  | 1    | 183  |   |





|                                                                                                                     |                                                                                                                 |                         |      |      |      |      |      |      |      |      |
|---------------------------------------------------------------------------------------------------------------------|-----------------------------------------------------------------------------------------------------------------|-------------------------|------|------|------|------|------|------|------|------|
| isoform=cb2698_c6;full_length_coverage=1;non_full_length_coverage=0;isoform_length=1752;expected_accuracy=0.998     |                                                                                                                 |                         |      |      |      |      |      |      |      | 5    |
| cb6609_c4/f1p0/2108                                                                                                 | gnl BL_ORD_ID 3768                                                                                              | cb6609_c2/f1p0/2814     |      |      |      |      |      |      |      |      |
| isoform=cb6609_c4;full_length_coverage=1;non_full_length_coverage=0;isoform_length=2108;expected_accuracy=0.993     | isoform=cb6609_c2;full_length_coverage=1;non_full_length_coverage=0;isoform_length=2814;expected_accuracy=0.999 |                         | 275  | 2108 | 61   | 279  | 917  | 2748 | 1    | 213  |
| cb5204_c1/f6p1/2806                                                                                                 | gnl BL_ORD_ID 46181                                                                                             | cb5204_c6/f1p1/2901     |      |      |      |      |      |      |      |      |
| isoform=cb5204_c1;full_length_coverage=6;non_full_length_coverage=1;isoform_length=2806;expected_accuracy=0.999     | isoform=cb5204_c6;full_length_coverage=1;non_full_length_coverage=1;isoform_length=2901;expected_accuracy=0.997 |                         | 16   | 1753 | 1753 | 2798 | 1    | 1739 | 1855 | 2901 |
| cb13748_c39/f1p0/3343                                                                                               | gnl BL_ORD_ID 62722                                                                                             | cb13748_c47/f1p0/3466   | 508  | 3204 | 88   | 509  | 572  | 3268 | 5    | 426  |
| cb1665_c3/f1p0/3650                                                                                                 | gnl BL_ORD_ID 31039                                                                                             | cb1665_c2/f1p0/3731     |      |      |      |      |      |      |      |      |
| isoform=cb1665_c2;full_length_coverage=1;non_full_length_coverage=0;isoform_length=3731;expected_accuracy=0.996     |                                                                                                                 |                         | 1    | 2893 | 2891 | 3508 | 70   | 2988 | 3114 | 3731 |
| cb8564_c53561/f1p0/2359                                                                                             | gnl BL_ORD_ID 14026                                                                                             | cb8564_c43137/f1p0/2726 |      |      |      |      |      |      |      |      |
| isoform=cb8564_c43137;full_length_coverage=1;non_full_length_coverage=0;isoform_length=2726;expected_accuracy=0.996 |                                                                                                                 |                         | 495  | 2342 | 6    | 499  | 881  | 2726 | 134  | 627  |
| cb228_c23/f1p0/3387                                                                                                 | gnl BL_ORD_ID 38752                                                                                             | cb228_c14/f1p0/3285     |      |      |      |      |      |      |      |      |
| isoform=cb228_c14;full_length_coverage=1;non_full_length_coverage=0;isoform_length=3285;expected_accuracy=1.000     |                                                                                                                 |                         | 1406 | 3071 | 1    | 1411 | 1614 | 3279 | 27   | 1436 |
| cb3290_c38/f1p0/2345                                                                                                | gnl BL_ORD_ID 40424                                                                                             | cb3290_c67/f1p0/2784    | 1150 | 2343 | 1    | 1151 | 1592 | 278  | 308  | 143  |

|                                                                                                                                            |                                                                                                                                                                           |      |      |      |      |      |          |      |          |
|--------------------------------------------------------------------------------------------------------------------------------------------|---------------------------------------------------------------------------------------------------------------------------------------------------------------------------|------|------|------|------|------|----------|------|----------|
| isoform=cb3290_c38;full_length_coverage=1;non_full_length_coverage=0;isoform_length=2345;expected_accuracy=0.996<br>cb2739_c1/f2p0/3546    | isoform=cb3290_c67;full_length_coverage=1;non_full_length_coverage=0;isoform_length=2784;expected_accuracy=0.999                                                          |      |      |      |      |      |          | 4    | 5        |
| isoform=cb2739_c1;full_length_coverage=2;non_full_length_coverage=0;isoform_length=3546;expected_accuracy=0.996<br>cb1772_c26/f1p0/3767    | gnl BL_ORD_ID 69934 cb2739_c3/f1p0/3875                                                                                                                                   | 1248 | 3525 | 1    | 1253 | 1505 | 377<br>7 | 152  | 140<br>1 |
| cb8564_c1372/f1p0/2553                                                                                                                     | gnl BL_ORD_ID 63938 cb1772_c19/f1p0/4042                                                                                                                                  | 232  | 3695 | 11   | 234  | 440  | 389<br>1 | 19   | 258      |
| cb8564_c90797/f1p0/2864                                                                                                                    | gnl BL_ORD_ID 12085      cb8564_c154026/f1p0/2823<br>isoform=cb8564_c154026;full_length_coverage=1;non_full_length_coverage=0;isoform_length=2823;expected_accuracy=0.992 | 1    | 1478 | 1479 | 2563 | 43   | 151<br>5 | 1736 | 282<br>3 |
| cb8564_c51722/f1p1/3503                                                                                                                    | gnl BL_ORD_ID 18126      cb8564_c83895/f1p1/2948<br>isoform=cb8564_c83895;full_length_coverage=1;non_full_length_coverage=1;isoform_length=2948;expected_accuracy=0.995   | 15   | 2307 | 2308 | 2657 | 175  | 246<br>8 | 2595 | 293<br>7 |
| cb8564_c39136/f1p0/3036                                                                                                                    | gnl BL_ORD_ID 56041 cb8564_c53077/f1p2/3406                                                                                                                               | 379  | 3215 | 67   | 379  | 452  | 328<br>8 | 22   | 337      |
| isoform=cb8564_c39136;full_length_coverage=1;non_full_length_coverage=0;isoform_length=3036;expected_accuracy=0.998<br>cb4862_c8/f1p0/2364 | gnl BL_ORD_ID 15924      cb8564_c52804/f1p5/3221<br>isoform=cb8564_c52804;full_length_coverage=1;non_full_length_coverage=5;isoform_length=3221;expected_accuracy=0.999   | 1    | 2089 | 2085 | 3036 | 1    | 209<br>4 | 2221 | 317<br>5 |
| isoform=cb4862_c8;full_length_coverage=1;non_full_length_coverage=0;isoform_length=2364;expected_accuracy=0.996                            | gnl BL_ORD_ID 42994      cb4862_c9/f1p1/3086<br>isoform=cb4862_c9;full_length_coverage=1;non_full_length_coverage=1;isoform_length=3086;expected_accuracy=0.999           | 1    | 1251 | 1247 | 2258 | 217  | 146<br>3 | 2039 | 304<br>4 |

|                                                                                                                 |                                                                                                                                                                          |      |      |      |      |      |          |      |          |  |
|-----------------------------------------------------------------------------------------------------------------|--------------------------------------------------------------------------------------------------------------------------------------------------------------------------|------|------|------|------|------|----------|------|----------|--|
| acy=0.992                                                                                                       | cy=0.997                                                                                                                                                                 |      |      |      |      |      |          |      |          |  |
| cb18409_c22/f2p0/1096                                                                                           | gnl BL_ORD_ID 48894 cb10833_c4/f1p0/2067                                                                                                                                 | 514  | 1031 | 7    | 514  | 1316 | 183<br>3 | 83   | 600      |  |
| cb500_c43/f1p0/3109                                                                                             |                                                                                                                                                                          |      |      |      |      |      |          |      |          |  |
| isoform=cb500_c43;full_length_coverage=1;non_full_length_coverage=0;isoform_length=3109;expected_accuracy=0.992 | gnl BL_ORD_ID 72247 cb500_c49/f1p0/3666                                                                                                                                  | 13   | 2306 | 2303 | 3107 | 118  | 239<br>5 | 2527 | 333<br>2 |  |
| cb12_c21/f1p0/4378                                                                                              |                                                                                                                                                                          |      |      |      |      |      |          |      |          |  |
| isoform=cb12_c21;full_length_coverage=1;non_full_length_coverage=0;isoform_length=4378;expected_accuracy=0.999  | gnl BL_ORD_ID 61091 cb12_c58/f1p0/5377                                                                                                                                   | 319  | 4197 | 1    | 319  | 1408 | 529<br>2 | 766  | 108<br>4 |  |
| cb8564_c5007/f1p0/1941                                                                                          | gnl BL_ORD_ID 9289      cb8564_c105652/f6p6/3755<br>isoform=cb8564_c105652;full_length_coverage=6;non_full_length_coverage=6;isoform_length=3755;expected_accuracy=0.999 | 1    | 1447 | 1446 | 1712 | 1910 | 335<br>6 | 3489 | 375<br>5 |  |
| cb8564_c21439/f1p0/2587                                                                                         | gnl BL_ORD_ID 10074      cb8564_c11613/f1p0/2758<br>isoform=cb8564_c11613;full_length_coverage=1;non_full_length_coverage=0;isoform_length=2758;expected_accuracy=0.991  | 1226 | 2572 | 1    | 1228 | 1383 | 275<br>8 | 3    | 126<br>2 |  |
| cb1833_c16/f1p2/3675                                                                                            | gnl BL_ORD_ID 33409      cb1833_c19/f1p1/3788<br>isoform=cb1833_c19;full_length_coverage=1;non_full_length_coverage=1;isoform_length=3788;expected_accuracy=0.991        | 146  | 3036 | 3034 | 3669 | 91   | 301<br>9 | 3139 | 378<br>8 |  |
| cb8564_c145558/f4p2/2640                                                                                        | gnl BL_ORD_ID 12099      cb8564_c12612/f1p0/2697<br>isoform=cb8564_c12612;full_length_coverage=1;non_full_length_coverage=2;isoform_length=2640;expected                 | 1    | 2474 | 2477 | 2610 | 183  | 266<br>6 | 2563 | 269<br>7 |  |

|                                                                                                                                                           |                                                                                                                                                                                     |      |      |      |      |      |      |      |      |
|-----------------------------------------------------------------------------------------------------------------------------------------------------------|-------------------------------------------------------------------------------------------------------------------------------------------------------------------------------------|------|------|------|------|------|------|------|------|
| _accuracy=1.000<br>cb3006_c7/f1p0/1659<br>isoform=cb3006_c7;full_length_coverage=1;non_full_length_coverage=0;isoform_length=1659;expected_accuracy=0.994 | curacy=0.995<br>gnl BL_ORD_ID 37998          cb3006_c4/f1p0/2052<br>isoform=cb3006_c4;full_length_coverage=1;non_full_length_coverage=0;isoform_length=2052;expected_accuracy=0.997 | 1    | 1112 | 1112 | 1659 | 34   | 1135 | 1387 | 1935 |
| cb8564_c91317/f1p0/2833                                                                                                                                   | gnl BL_ORD_ID 14501          cb8564_c24947/f1p0/3141<br>isoform=cb8564_c24947;full_length_coverage=1;non_full_length_coverage=0;isoform_length=3141;expected_accuracy=0.997         | 477  | 2794 | 60   | 482  | 850  | 3141 | 1    | 423  |
| cb295_c53/f1p0/1719<br>isoform=cb295_c53;full_length_coverage=1;non_full_length_coverage=0;isoform_length=1719;expected_accuracy=0.994                    | gnl BL_ORD_ID 67912   cb18646_c8/f1p2/6225                                                                                                                                          | 1    | 1347 | 1345 | 1719 | 4395 | 5744 | 5869 | 6236 |
| cb5307_c0/f9p0/3058<br>isoform=cb5307_c0;full_length_coverage=9;non_full_length_coverage=0;isoform_length=3058;expected_accuracy=1.000                    | gnl BL_ORD_ID 73769   cb5307_c7/f1p0/3894                                                                                                                                           | 137  | 1714 | 1710 | 3047 | 3    | 1580 | 2554 | 3891 |
| cb8564_c106924/f3p13/3304<br>isoform=cb8564_c106924;full_length_coverage=3;non_full_length_coverage=13;isoform_length=3304;expected_accuracy=1.000        | gnl BL_ORD_ID 14187          cb8564_c45896/f1p0/3360<br>isoform=cb8564_c45896;full_length_coverage=1;non_full_length_coverage=0;isoform_length=3360;expected_accuracy=0.996         | 108  | 2134 | 2134 | 3281 | 57   | 2081 | 2215 | 3360 |
| cb1658_c15/f1p0/2863<br>isoform=cb1658_c15;full_length_coverage=1;non_full_length_coverage=0;isoform_length=2863;expected_accuracy=0.994                  | gnl BL_ORD_ID 63834   cb1658_c42/f1p0/3937                                                                                                                                          | 1153 | 2863 | 1    | 1156 | 2152 | 3862 | 8    | 1160 |
| cb1326_c9/f1p0/3549                                                                                                                                       | gnl BL_ORD_ID 61238   cb1326_c5/f1p0/4374                                                                                                                                           | 1    | 3198 | 3194 | 3466 | 135  | 333  | 3645 | 391  |

|                                                                                                                     |                                                                                                                      |                          |     |      |      |      |     |      |      |      |
|---------------------------------------------------------------------------------------------------------------------|----------------------------------------------------------------------------------------------------------------------|--------------------------|-----|------|------|------|-----|------|------|------|
| isoform=cb1326_c9;full_length_coverage=1;non_full_length_coverage=0;isoform_length=3549;expected_accuracy=0.996     |                                                                                                                      |                          |     |      |      |      |     | 2    |      | 7    |
| cb12931_c15/f1p0/1493                                                                                               | gnl BL_ORD_ID 16795                                                                                                  | cb8564_c73428/f1p0/2966  |     |      |      |      |     |      |      |      |
| isoform=cb12931_c15;full_length_coverage=1;non_full_length_coverage=0;isoform_length=1493;expected_accuracy=1.000   | isoform=cb8564_c73428;full_length_coverage=1;non_full_length_coverage=0;isoform_length=2966;expected_accuracy=0.994  |                          | 1   | 1106 | 1104 | 1493 | 7   | 1107 | 2579 | 2966 |
| cb2645_c10/f1p0/3344                                                                                                | gnl BL_ORD_ID 68675                                                                                                  | cb2645_c13/f1p0/3678     |     |      |      |      |     |      |      |      |
| cb8564_c44698/f1p5/2843                                                                                             | gnl BL_ORD_ID 57176                                                                                                  | cb8564_c85665/f1p0/3087  |     |      |      |      |     |      |      |      |
| isoform=cb8564_c44698;full_length_coverage=1;non_full_length_coverage=5;isoform_length=2843;expected_accuracy=0.997 |                                                                                                                      |                          | 13  | 2516 | 2511 | 2826 | 2   | 2523 | 2644 | 2965 |
| cb4444_c8/f1p0/2558                                                                                                 | gnl BL_ORD_ID 43662                                                                                                  | cb4444_c7/f1p0/2681      |     |      |      |      |     |      |      |      |
| isoform=cb4444_c8;full_length_coverage=1;non_full_length_coverage=0;isoform_length=2558;expected_accuracy=0.994     | isoform=cb4444_c7;full_length_coverage=1;non_full_length_coverage=0;isoform_length=2681;expected_accuracy=0.993      |                          | 1   | 1624 | 1620 | 2484 | 3   | 1633 | 1792 | 2681 |
| cb12931_c15/f1p0/1493                                                                                               | gnl BL_ORD_ID 13054                                                                                                  | cb8564_c181182/f1p0/2830 |     |      |      |      |     |      |      |      |
| isoform=cb12931_c15;full_length_coverage=1;non_full_length_coverage=0;isoform_length=1493;expected_accuracy=1.000   | isoform=cb8564_c181182;full_length_coverage=1;non_full_length_coverage=0;isoform_length=2830;expected_accuracy=0.998 |                          | 1   | 1106 | 1104 | 1492 | 1   | 1100 | 2442 | 2830 |
| cb187_c11/f1p1/3861                                                                                                 | gnl BL_ORD_ID 34572                                                                                                  | cb187_c9/f1p0/4217       |     |      |      |      |     |      |      |      |
|                                                                                                                     | isoform=cb187_c9;full_length_coverage=1;non_full_length_coverage=0;isoform_length=4217;expected_accuracy=1.000       |                          | 142 | 3876 | 1    | 145  | 482 | 4217 | 21   | 165  |
| cb1379_c3/f2p0/3748                                                                                                 | gnl BL_ORD_ID 61303                                                                                                  | cb1379_c14/f1p0/3762     |     |      |      |      |     |      |      |      |
|                                                                                                                     |                                                                                                                      |                          | 1   | 2330 | 2330 | 3646 | 3   | 233  | 2434 | 375  |

|                                                                                                                 |                                                                                                                                                                           |     |      |      |      |     |      |      |      |
|-----------------------------------------------------------------------------------------------------------------|---------------------------------------------------------------------------------------------------------------------------------------------------------------------------|-----|------|------|------|-----|------|------|------|
| isoform=cb1379_c3;full_length_coverage=2;non_full_length_coverage=0;isoform_length=3748;expected_accuracy=0.996 |                                                                                                                                                                           |     |      |      |      |     |      | 4    | 0    |
| cb1768_c14/f1p0/3461                                                                                            | gnl BL_ORD_ID 32884      cb1768_c0/f20p2/3608<br>isoform=cb1768_c0;full_length_coverage=20;non_full_length_coverage=2;isoform_length=3608;expected_accuracy=1.000         | 1   | 2336 | 2333 | 3380 | 15  | 2350 | 2498 | 3545 |
| cb8564_c83100/f1p1/2671                                                                                         | gnl BL_ORD_ID 9280      cb8564_c107656/f6p3/3035<br>isoform=cb8564_c83100;full_length_coverage=1;non_full_length_coverage=1;isoform_length=2671;expected_accuracy=0.996   | 1   | 1637 | 1636 | 2671 | 1   | 1633 | 1998 | 3021 |
| cb8747_c11/f1p0/1868                                                                                            | gnl BL_ORD_ID 18977      cb8747_c5/f1p0/2009<br>isoform=cb8747_c5;full_length_coverage=1;non_full_length_coverage=0;isoform_length=2009;expected_accuracy=0.999           | 526 | 1881 | 57   | 528  | 591 | 1945 | 1    | 472  |
| cb8564_c49562/f1p0/2838                                                                                         | gnl BL_ORD_ID 54747      cb8564_c162728/f1p28/3382<br>isoform=cb8564_c49562;full_length_coverage=1;non_full_length_coverage=0;isoform_length=2838;expected_accuracy=0.995 | 2   | 2331 | 2327 | 2838 | 168 | 2497 | 2829 | 3344 |
| cb910_c28/f1p1/2974                                                                                             | gnl BL_ORD_ID 21606      cb910_c32/f1p1/3242<br>isoform=cb910_c28;full_length_coverage=1;non_full_length_coverage=1;isoform_length=2974;expected_accuracy=0.995           | 1   | 2158 | 2156 | 2974 | 2   | 2160 | 2276 | 3094 |
| cb6441_c15/f1p0/2019                                                                                            | gnl BL_ORD_ID 4984      cb6441_c16/f1p0/2176<br>isoform=cb6441_c15;full_length_coverage=1;non_full_length_coverage=0;isoform_length=2019;expected_accuracy=0.996          | 251 | 2019 | 56   | 250  | 369 | 2141 | 1    | 197  |

|                                                                                                                                                                 |                                                                                                                                                                                                                            |      |      |      |      |      |          |      |          |
|-----------------------------------------------------------------------------------------------------------------------------------------------------------------|----------------------------------------------------------------------------------------------------------------------------------------------------------------------------------------------------------------------------|------|------|------|------|------|----------|------|----------|
| racy=0.993<br>cb15484_c3/f1p0/1383<br>isoform=cb15484_c3;full_length_coverage=1;non_full_length_coverage=0;isoform_length=1383;expected_accuracy=0.991          | acy=0.994<br>gnl BL_ORD_ID 27887                      cb15484_c0/f1p0/1773<br>isoform=cb15484_c0;full_length_coverage=1;non_full_length_coverage=0;isoform_length=1773;expected_accuracy=0.994                             | 1    | 1020 | 1019 | 1383 | 275  | 129<br>4 | 1413 | 177<br>3 |
| cb8564_c40333/f1p2/4446<br>isoform=cb8564_c40333;full_length_coverage=1;non_full_length_coverage=2;isoform_length=4446;expected_accuracy=0.998                  | gnl BL_ORD_ID 14942                      cb8564_c34188/f2p3/4546<br>isoform=cb8564_c34188;full_length_coverage=2;non_full_length_coverage=3;isoform_length=4546;expected_accuracy=1.000                                    | 271  | 4446 | 1    | 275  | 398  | 454<br>6 | 18   | 293      |
| cb13119_c5/f1p0/1886<br>cb309_c7/f1p2/4109<br>isoform=cb309_c7;full_length_coverage=1;non_full_length_coverage=2;isoform_length=4109;expected_accuracy=0.997    | gnl BL_ORD_ID 71114   cb3343_c9/f1p0/2028<br>gnl BL_ORD_ID 38926                      cb309_c9/f1p2/4191<br>isoform=cb309_c9;full_length_coverage=1;non_full_length_coverage=2;isoform_length=4191;expected_accuracy=0.998 | 1    | 1305 | 1303 | 1761 | 22   | 132<br>6 | 1467 | 192<br>6 |
| cb8564_c122886/f1p1/2748<br>isoform=cb8564_c122886;full_length_coverage=1;non_full_length_coverage=1;isoform_length=2748;expected_accuracy=0.991                | gnl BL_ORD_ID 16505                      cb8564_c73731/f2p0/4847<br>isoform=cb8564_c73731;full_length_coverage=2;non_full_length_coverage=0;isoform_length=4847;expected_accuracy=0.996                                    | 1116 | 2748 | 1    | 1118 | 3074 | 470<br>4 | 250  | 136<br>8 |
| cb11848_c11/f1p0/1203<br>cb2927_c2/f2p0/3116<br>isoform=cb2927_c2;full_length_coverage=2;non_full_length_coverage=0;isoform_length=3116;expected_accuracy=0.997 | gnl BL_ORD_ID 16105                      cb8564_c71556/f1p0/1991<br>isoform=cb8564_c71556;full_length_coverage=1;non_full_length_coverage=0;isoform_length=1991;expected_accuracy=0.997                                    | 218  | 1199 | 4    | 217  | 1006 | 199<br>1 | 1    | 213      |
| gnl BL_ORD_ID 69004   cb2927_c9/f1p1/3279<br>isoform=cb2927_c9;full_length_coverage=2;non_full_length_coverage=0;isoform_length=3279;expected_accuracy=0.997    |                                                                                                                                                                                                                            | 1327 | 3109 | 10   | 1326 | 1465 | 325<br>0 | 1    | 131<br>8 |

|                                                                                                                     |                                                                                                                   |                         |      |      |      |      |      |      |      |      |
|---------------------------------------------------------------------------------------------------------------------|-------------------------------------------------------------------------------------------------------------------|-------------------------|------|------|------|------|------|------|------|------|
| cy=0.995                                                                                                            |                                                                                                                   |                         |      |      |      |      |      |      |      |      |
| cb8564_c36011/f1p0/3015                                                                                             | gnl BL_ORD_ID 56353                                                                                               | cb8564_c75114/f1p0/2866 | 14   | 2049 | 2049 | 2595 | 14   | 2035 | 2193 | 2737 |
| cb3010_c18/f1p2/2828                                                                                                | gnl BL_ORD_ID 38253                                                                                               | cb3010_c15/f1p0/2932    |      |      |      |      |      |      |      |      |
| isoform=cb3010_c18;full_length_coverage=1;non_full_length_coverage=2;isoform_length=2828;expected_accuracy=0.999    | isoform=cb3010_c15;full_length_coverage=1;non_full_length_coverage=0;isoform_length=2932;expected_accuracy=0.997  |                         | 1049 | 2790 | 1    | 1050 | 1192 | 2932 | 32   | 1078 |
| cb1333_c101/f1p0/1395                                                                                               | gnl BL_ORD_ID 27473                                                                                               | cb1333_c63/f1p0/4699    |      |      |      |      |      |      |      |      |
| isoform=cb1333_c101;full_length_coverage=1;non_full_length_coverage=0;isoform_length=1395;expected_accuracy=0.997   | isoform=cb1333_c63;full_length_coverage=1;non_full_length_coverage=0;isoform_length=4699;expected_accuracy=0.998  |                         | 148  | 1395 | 6    | 150  | 3375 | 4621 | 1    | 144  |
| cb8564_c45300/f1p4/3014                                                                                             |                                                                                                                   |                         |      |      |      |      |      |      |      |      |
| isoform=cb8564_c45300;full_length_coverage=1;non_full_length_coverage=4;isoform_length=3014;expected_accuracy=0.996 | gnl BL_ORD_ID 55910                                                                                               | cb8564_c48645/f1p1/3287 | 243  | 2952 | 12   | 246  | 404  | 3113 | 17   | 248  |
| cb8564_c80689/f1p0/2162                                                                                             |                                                                                                                   |                         |      |      |      |      |      |      |      |      |
| isoform=cb8564_c80689;full_length_coverage=1;non_full_length_coverage=0;isoform_length=2162;expected_accuracy=0.996 | gnl BL_ORD_ID 54038                                                                                               | cb8564_c17261/f1p0/3204 | 1023 | 2114 | 1    | 1024 | 1999 | 3094 | 23   | 1049 |
| cb5516_c26/f1p0/3029                                                                                                | gnl BL_ORD_ID 45043                                                                                               | cb5516_c85/f68p0/3217   |      |      |      |      |      |      |      |      |
| isoform=cb5516_c26;full_length_coverage=1;non_full_length_coverage=0;isoform_length=3029;expected_accuracy=1.000    | isoform=cb5516_c85;full_length_coverage=68;non_full_length_coverage=0;isoform_length=3217;expected_accuracy=1.000 |                         | 10   | 2327 | 2322 | 2962 | 136  | 2452 | 2577 | 3217 |
| cb8564_c39136/f1p0/3036                                                                                             |                                                                                                                   |                         |      |      |      |      |      |      |      |      |
| isoform=cb8564_c39136;full_length_coverage=1;non_full_length_coverage=0;isoform_length=3036;expected_               | gnl BL_ORD_ID 56764                                                                                               | cb8564_c70795/f1p0/3769 | 19   | 2089 | 2085 | 3036 | 34   | 2111 | 2238 | 3187 |



|                                                                                                                       |                                                                                                                     |                         |      |      |      |      |      |      |      |      |
|-----------------------------------------------------------------------------------------------------------------------|---------------------------------------------------------------------------------------------------------------------|-------------------------|------|------|------|------|------|------|------|------|
| accuracy=0.998                                                                                                        |                                                                                                                     |                         |      |      |      |      |      |      |      |      |
| cb3856_c0/f2p1/1619                                                                                                   | gnl BL_ORD_ID 40760                                                                                                 | cb3856_c3/f1p0/3507     |      |      |      |      |      |      |      |      |
| isoform=cb3856_c0;full_length_coverage=2;non_full_length_coverage=1;isoform_length=1619;expected_accuracy=0.996       | isoform=cb3856_c3;full_length_coverage=1;non_full_length_coverage=0;isoform_length=3507;expected_accuracy=0.998     |                         | 128  | 1619 | 1    | 131  | 2018 | 3506 | 1    | 132  |
| cb8564_c132795/f5p10/3729                                                                                             | gnl BL_ORD_ID 16248                                                                                                 | cb8564_c5118/f1p1/4889  |      |      |      |      |      |      |      |      |
| isoform=cb8564_c132795;full_length_coverage=5;non_full_length_coverage=10;isoform_length=3729;expected_accuracy=0.999 | isoform=cb8564_c5118;full_length_coverage=1;non_full_length_coverage=1;isoform_length=4889;expected_accuracy=0.991  |                         | 1    | 1832 | 1830 | 3640 | 1    | 1822 | 2987 | 4791 |
| cb944_c33/f1p1/3119                                                                                                   | gnl BL_ORD_ID 19525                                                                                                 | cb944_c27/f2p0/3667     |      |      |      |      |      |      |      |      |
| isoform=cb944_c33;full_length_coverage=1;non_full_length_coverage=1;isoform_length=3119;expected_accuracy=1.000       | isoform=cb944_c27;full_length_coverage=2;non_full_length_coverage=0;isoform_length=3667;expected_accuracy=0.999     |                         | 1465 | 3068 | 1    | 1467 | 2068 | 3667 | 5    | 1465 |
| cb8564_c12805/f1p0/2580                                                                                               |                                                                                                                     |                         |      |      |      |      |      |      |      |      |
| isoform=cb8564_c12805;full_length_coverage=1;non_full_length_coverage=0;isoform_length=2580;expected_accuracy=0.993   | gnl BL_ORD_ID 56580                                                                                                 | cb8564_c47159/f1p0/3238 | 16   | 1695 | 1690 | 2580 | 81   | 1761 | 2003 | 2896 |
| cb8564_c185920/f1p0/2777                                                                                              | gnl BL_ORD_ID 14836                                                                                                 | cb8564_c41692/f1p3/2987 |      |      |      |      |      |      |      |      |
| isoform=cb8564_c185920;full_length_coverage=1;non_full_length_coverage=0;isoform_length=2777;expected_accuracy=0.996  | isoform=cb8564_c41692;full_length_coverage=1;non_full_length_coverage=3;isoform_length=2987;expected_accuracy=0.995 |                         | 174  | 2773 | 1    | 177  | 352  | 2987 | 15   | 193  |
| cb3307_c38/f1p0/2373                                                                                                  | gnl BL_ORD_ID 41080                                                                                                 | cb3307_c5/f2p0/3313     |      |      |      |      |      |      |      |      |
|                                                                                                                       | isoform=cb3307_c5;full_length_coverage=2;non_full_length_coverage=0;isoform_length=3313;expected_accuracy=0.997     |                         | 136  | 2108 | 1    | 137  | 1342 | 3313 | 19   | 155  |
| cb1514_c4/f2p1/3503                                                                                                   | gnl BL_ORD_ID 63697                                                                                                 | cb1514_c10/f1p0/3670    | 1    | 3277 | 3277 | 3439 | 1    | 327  | 3372 | 353  |

|                                                                                                                 |                                                                                                                                                                         |     |      |      |      |      |      |      |  |      |
|-----------------------------------------------------------------------------------------------------------------|-------------------------------------------------------------------------------------------------------------------------------------------------------------------------|-----|------|------|------|------|------|------|--|------|
| isoform=cb1514_c4;full_length_coverage=2;non_full_length_coverage=1;isoform_length=3503;expected_accuracy=0.997 |                                                                                                                                                                         |     |      |      |      |      |      | 1    |  | 5    |
| cb11848_c2/f1p1/1232                                                                                            | gnl BL_ORD_ID 15933      cb8564_c68761/f3p4/1935<br>isoform=cb8564_c68761;full_length_coverage=3;non_full_length_coverage=4;isoform_length=1935;expected_accuracy=1.000 | 243 | 1178 | 39   | 242  | 1000 | 1934 | 3    |  | 207  |
| cb4494_c7/f1p0/2870                                                                                             | gnl BL_ORD_ID 72612      cb4494_c1/f1p0/3279<br>isoform=cb4494_c7;full_length_coverage=1;non_full_length_coverage=0;isoform_length=2870;expected_accuracy=0.995         | 2   | 2637 | 2637 | 2870 | 1    | 2646 | 2868 |  | 3104 |
| cb850_c20/f1p0/1927                                                                                             | gnl BL_ORD_ID 10143      cb850_c28/f1p0/3553<br>isoform=cb850_c28;full_length_coverage=1;non_full_length_coverage=0;isoform_length=3553;expected_accuracy=0.992         | 190 | 1904 | 2    | 192  | 1775 | 3509 | 111  |  | 305  |
| cb8564_c98278/f5p6/2387                                                                                         | gnl BL_ORD_ID 13975      cb8564_c42753/f2p0/2720<br>isoform=cb8564_c98278;full_length_coverage=5;non_full_length_coverage=6;isoform_length=2387;expected_accuracy=0.995 | 1   | 1387 | 1385 | 2387 | 1    | 1389 | 1714 |  | 2720 |
| cb295_c26/f1p1/1869                                                                                             | gnl BL_ORD_ID 68178      cb295_c28/f1p1/2235<br>isoform=cb295_c26;full_length_coverage=1;non_full_length_coverage=0;isoform_length=1869;expected_accuracy=0.992         | 1   | 1359 | 1358 | 1857 | 1    | 1359 | 1490 |  | 1989 |
| cb5221_c27/f1p0/3107                                                                                            | gnl BL_ORD_ID 45937      cb5221_c7/f1p0/3686<br>isoform=cb5221_c7;full_length_coverage=1;non_full_length_coverage=0;isoform_length=3686;expected_accuracy=0.996         | 1   | 1716 | 1713 | 3080 | 2    | 1736 | 2170 |  | 3537 |
| cb8564_c11824/f2p0/2433                                                                                         | gnl BL_ORD_ID 54126      cb8564_c18992/f1p0/3876<br>isoform=cb8564_c11824;full_length_coverage=1;non_full_length_coverage=0;isoform_length=2433;expected_accuracy=0.992 | 12  | 1397 | 1395 | 2433 | 1    | 138  | 2624 |  | 366  |

|                                                                                                                     |                     |                         |                                                                                                                     |     |      |      |      |      |      |      |      |
|---------------------------------------------------------------------------------------------------------------------|---------------------|-------------------------|---------------------------------------------------------------------------------------------------------------------|-----|------|------|------|------|------|------|------|
| isoform=cb8564_c11824;full_length_coverage=2;non_full_length_coverage=0;isoform_length=2433;expected_accuracy=1.000 |                     |                         |                                                                                                                     |     |      |      |      | 6    | 7    |      |      |
| cb5125_c34/f1p0/1890                                                                                                | gnl BL_ORD_ID 43699 | cb5125_c8/f3p3/2148     | isoform=cb5125_c8;full_length_coverage=3;non_full_length_coverage=3;isoform_length=2148;expected_accuracy=0.999     | 1   | 1145 | 1144 | 1780 | 1    | 1141 | 1333 | 1968 |
| cb5851_c6/f1p0/2655                                                                                                 | gnl BL_ORD_ID 45118 | cb5851_c9/f1p0/2643     | isoform=cb5851_c9;full_length_coverage=1;non_full_length_coverage=0;isoform_length=2643;expected_accuracy=1.000     | 406 | 2435 | 5    | 409  | 632  | 2643 | 1    | 393  |
| cb3575_c3/f2p1/3187                                                                                                 | gnl BL_ORD_ID 70471 | cb3575_c6/f1p1/3530     | isoform=cb3575_c3;full_length_coverage=2;non_full_length_coverage=1;isoform_length=3187;expected_accuracy=1.000     | 1   | 2555 | 2555 | 3047 | 1    | 2561 | 3027 | 3519 |
| cb3887_c10/f1p0/2589                                                                                                | gnl BL_ORD_ID 39511 | cb3887_c5/f1p0/2830     | isoform=cb3887_c5;full_length_coverage=1;non_full_length_coverage=0;isoform_length=2830;expected_accuracy=0.996     | 10  | 1802 | 1798 | 2386 | 107  | 1900 | 2239 | 2830 |
| cb8564_c42814/f1p0/2151                                                                                             | gnl BL_ORD_ID 14263 | cb8564_c42654/f1p1/2906 | isoform=cb8564_c42814;full_length_coverage=1;non_full_length_coverage=0;isoform_length=2151;expected_accuracy=0.993 | 650 | 2129 | 7    | 652  | 1339 | 2824 | 1    | 651  |
| cb9434_c4/f1p0/2082                                                                                                 | gnl BL_ORD_ID 58718 | cb9434_c5/f1p0/2667     | isoform=cb8564_c42654;full_length_coverage=1;non_full_length_coverage=1;isoform_length=2906;expected_accuracy=0.990 | 1   | 1038 | 1037 | 2079 | 2    | 1040 | 1465 | 2507 |
| cb8564_c36731/f1p2/2761                                                                                             | gnl BL_ORD_ID 15193 | cb8564_c42308/f1p5/3192 |                                                                                                                     | 1   | 1977 | 1972 | 2735 | 5    | 199  | 2427 | 319  |

|                         |                                                                                                                                                                                         |      |      |      |      |      |      |      |      |
|-------------------------|-----------------------------------------------------------------------------------------------------------------------------------------------------------------------------------------|------|------|------|------|------|------|------|------|
|                         | isoform=cb8564_c42308;full_length_coverage=1;non_full_length_coverage=5;isoform_length=3192;expected_accuracy=0.995                                                                     |      |      |      |      |      |      | 8    | 1    |
| cb341_c10/f1p0/3009     | gnl BL_ORD_ID 40575                      cb341_c21/f1p0/3212<br>isoform=cb341_c21;full_length_coverage=1;non_full_length_coverage=0;isoform_length=3212;expected_accuracy=0.991         | 18   | 2686 | 2683 | 2900 | 1    | 2684 | 2992 | 3212 |
| cb8564_c53036/f1p0/2917 | gnl BL_ORD_ID 15819                      cb8564_c51027/f1p0/3064<br>isoform=cb8564_c53036;full_length_coverage=1;non_full_length_coverage=0;isoform_length=2917;expected_accuracy=0.999 | 1    | 2267 | 2267 | 2917 | 1    | 2268 | 2376 | 3024 |
| cb2935_c11/f1p0/3067    | gnl BL_ORD_ID 70092                      cb2935_c30/f1p0/3442<br>isoform=cb2935_c11;full_length_coverage=1;non_full_length_coverage=0;isoform_length=3067;expected_accuracy=0.999       | 259  | 3067 | 2    | 263  | 533  | 3343 | 8    | 269  |
| cb4576_c55/f1p2/3996    | gnl BL_ORD_ID 44415                      cb4576_c54/f1p0/4341<br>isoform=cb4576_c55;full_length_coverage=1;non_full_length_coverage=2;isoform_length=3996;expected_accuracy=0.994       | 1937 | 3985 | 134  | 1938 | 2301 | 4341 | 46   | 1837 |
| cb17744_c27/f1p0/1267   | gnl BL_ORD_ID 31103                      cb17744_c12/f1p0/5455<br>isoform=cb17744_c12;full_length_coverage=1;non_full_length_coverage=0;isoform_length=5455;expected_accuracy=0.998     | 416  | 1189 | 9    | 416  | 4443 | 5211 | 1    | 407  |
| cb3771_c6/f1p0/3096     | gnl BL_ORD_ID 40598                      cb3771_c5/f1p0/3508<br>isoform=cb3771_c6;full_length_coverage=1;non_full_length_coverage=0;isoform_length=3096;expected_accuracy=0.999         | 186  | 3096 | 1    | 187  | 590  | 3495 | 27   | 213  |

|                                                                                                                     |                                                                                                                     |     |      |      |      |     |      |      |      |   |  |
|---------------------------------------------------------------------------------------------------------------------|---------------------------------------------------------------------------------------------------------------------|-----|------|------|------|-----|------|------|------|---|--|
| acy=0.996                                                                                                           | cy=0.993                                                                                                            |     |      |      |      |     |      |      |      |   |  |
| cb18456_c6530/f1p0/1200                                                                                             | gnl BL_ORD_ID 56888 cb8564_c75479/f1p1/2639                                                                         | 260 | 1160 | 3    | 259  | 959 | 60   | 1746 | 149  | 0 |  |
| cb8564_c14268/f6p2/4833                                                                                             |                                                                                                                     |     |      |      |      |     |      |      |      |   |  |
| isoform=cb8564_c14268;full_length_coverage=6;non_full_length_coverage=2;isoform_length=4833;expected_accuracy=0.998 | gnl BL_ORD_ID 50937 cb737_c63/f1p2/5575                                                                             | 1   | 4212 | 4212 | 4832 | 1   | 4214 | 4994 | 5614 | 4 |  |
| cb8564_c40598/f1p4/3119                                                                                             | gnl BL_ORD_ID 55243 cb8564_c36242/f1p0/3335                                                                         | 1   | 2732 | 2729 | 3069 | 1   | 2733 | 2854 | 3192 | 2 |  |
|                                                                                                                     | gnl BL_ORD_ID 14409 cb8564_c40201/f1p0/3342                                                                         |     |      |      |      |     |      |      |      |   |  |
| cb8564_c86614/f1p2/3276                                                                                             | isoform=cb8564_c40201;full_length_coverage=1;non_full_length_coverage=0;isoform_length=3342;expected_accuracy=0.993 | 101 | 3178 | 1    | 103  | 271 | 3342 | 6    | 107  |   |  |
|                                                                                                                     | gnl BL_ORD_ID 23460 cb1163_c13/f1p1/3869                                                                            |     |      |      |      |     |      |      |      |   |  |
| cb1163_c65/f1p1/3715                                                                                                | isoform=cb1163_c13;full_length_coverage=1;non_full_length_coverage=1;isoform_length=3869;expected_accuracy=0.992    | 1   | 2651 | 2651 | 3707 | 1   | 2635 | 2818 | 3868 | 8 |  |
| cb8564_c5070/f1p0/2861                                                                                              | gnl BL_ORD_ID 56565 cb8564_c5064/f1p0/3231                                                                          | 10  | 1660 | 1659 | 2831 | 30  | 1679 | 1572 | 2744 | 4 |  |
| cb8564_c89748/f3p1/2815                                                                                             | gnl BL_ORD_ID 17430 cb8564_c85912/f1p1/2858                                                                         |     |      |      |      |     |      |      |      |   |  |
| isoform=cb8564_c89748;full_length_coverage=3;non_full_length_coverage=1;isoform_length=2815;expected_accuracy=0.998 | isoform=cb8564_c85912;full_length_coverage=1;non_full_length_coverage=1;isoform_length=2858;expected_accuracy=0.999 | 1   | 1737 | 1736 | 2737 | 9   | 1741 | 1858 | 2858 | 8 |  |
|                                                                                                                     | gnl BL_ORD_ID 36991 cb2869_c22/f1p0/2751                                                                            |     |      |      |      |     |      |      |      |   |  |
| cb2869_c39/f1p0/1988                                                                                                | isoform=cb2869_c22;full_length_coverage=1;non_full_length_coverage=0;isoform_length=2751;expected_accuracy=0.993    | 12  | 1262 | 1262 | 1796 | 1   | 1250 | 2217 | 2751 | 1 |  |

|                         |                                                                                                                                                                                              |     |      |      |      |     |      |      |      |
|-------------------------|----------------------------------------------------------------------------------------------------------------------------------------------------------------------------------------------|-----|------|------|------|-----|------|------|------|
| cb1193_c21/f1p1/3672    | acy=0.999<br>gnl BL_ORD_ID 22832                      cb1193_c5/f2p1/3708<br>isoform=cb1193_c5;full_length_coverage=2;non_full_length_coverage=1;isoform_length=3708;expected_accuracy=0.997 | 1   | 1867 | 1864 | 3554 | 6   | 1868 | 2019 | 3708 |
| cb5103_c18/f1p0/1858    | isoform=cb5103_c18;full_length_coverage=1;non_full_length_coverage=0;isoform_length=1858;expected_accuracy=0.994<br>gnl BL_ORD_ID 72111      cb5103_c7/f1p0/2511                             | 1   | 1522 | 1519 | 1857 | 2   | 1534 | 2045 | 2377 |
| cb4098_c71/f2p1/3728    | gnl BL_ORD_ID 39575                      cb4098_c28/f1p1/4006<br>isoform=cb4098_c71;full_length_coverage=2;non_full_length_coverage=1;isoform_length=3728;expected_accuracy=1.000            | 107 | 1977 | 1973 | 3726 | 1   | 1869 | 2252 | 4006 |
| cb5633_c34/f1p3/2503    | gnl BL_ORD_ID 45226                      cb5633_c81/f1p0/2727<br>isoform=cb5633_c34;full_length_coverage=1;non_full_length_coverage=3;isoform_length=2503;expected_accuracy=0.996            | 332 | 2503 | 83   | 335  | 460 | 2720 | 13   | 286  |
| cb8564_c18662/f1p0/2467 | gnl BL_ORD_ID 13115                      cb8564_c16916/f7p1/3034<br>isoform=cb8564_c18662;full_length_coverage=1;non_full_length_coverage=0;isoform_length=2467;expected_accuracy=0.997      | 1   | 1823 | 1824 | 2464 | 143 | 1968 | 2098 | 2739 |
| cb12662_c12/f1p0/1497   | isoform=cb12662_c12;full_length_coverage=1;non_full_length_coverage=0;isoform_length=1497;expected_accuracy=1.000<br>gnl BL_ORD_ID 61792      cb12662_c11/f1p0/1530                          | 125 | 1423 | 1    | 129  | 234 | 1532 | 1    | 129  |
| cb8831_c9/f1p1/2228     | gnl BL_ORD_ID 17278                      cb8831_c5/f1p0/2282                                                                                                                                 | 1   | 1550 | 1550 | 2118 | 2   | 159  | 1693 | 228  |

|                                                                                                                                        |                                                                                                                                                                                  |     |      |      |      |      |     |      |     |
|----------------------------------------------------------------------------------------------------------------------------------------|----------------------------------------------------------------------------------------------------------------------------------------------------------------------------------|-----|------|------|------|------|-----|------|-----|
| isoform=cb8831_c9;full_length_coverage=1;non_full_length_coverage=1;isoform_length=2228;expected_accuracy=0.993<br>cb8253_c9/f1p0/1760 | isoform=cb8831_c5;full_length_coverage=1;non_full_length_coverage=0;isoform_length=2282;expected_accuracy=0.997<br>gnl BL_ORD_ID 8384                      cb8253_c11/f4p0/1869  |     |      |      |      |      | 0   |      | 2   |
| isoform=cb8253_c9;full_length_coverage=1;non_full_length_coverage=0;isoform_length=1760;expected_accuracy=0.993<br>cb1490_c4/f1p3/4064 | isoform=cb8253_c11;full_length_coverage=4;non_full_length_coverage=0;isoform_length=1869;expected_accuracy=1.000<br>gnl BL_ORD_ID 30687                      cb1490_c2/f1p1/4303 | 1   | 1594 | 1594 | 1760 | 1    | 160 | 1701 | 186 |
|                                                                                                                                        | isoform=cb1490_c2;full_length_coverage=1;non_full_length_coverage=1;isoform_length=4303;expected_accuracy=0.994                                                                  | 1   | 2550 | 2547 | 3910 | 1    | 255 | 2942 | 430 |
| cb8564_c15653/f1p4/2475                                                                                                                | gnl BL_ORD_ID 55583   cb8564_c45873/f1p2/2968                                                                                                                                    | 22  | 2293 | 2289 | 2482 | 32   | 230 | 2520 | 271 |
| cb7976_c18/f1p0/2021                                                                                                                   | gnl BL_ORD_ID 50806   cb7976_c7/f1p0/2654                                                                                                                                        | 735 | 1990 | 81   | 737  | 1366 | 262 | 1    | 657 |
| cb8564_c43399/f1p0/2654                                                                                                                | gnl BL_ORD_ID 13273   cb8564_c188193/f1p0/2849                                                                                                                                   |     |      |      |      |      |     |      |     |
| isoform=cb8564_c43399;full_length_coverage=1;non_full_length_coverage=0;isoform_length=2654;expected_accuracy=0.999                    | isoform=cb8564_c188193;full_length_coverage=1;non_full_length_coverage=0;isoform_length=2849;expected_accuracy=0.997                                                             | 1   | 2367 | 2363 | 2653 | 1    | 234 | 2559 | 284 |
| cb4233_c62/f1p0/3000                                                                                                                   | gnl BL_ORD_ID 72364   cb4233_c56/f1p0/2924                                                                                                                                       | 1   | 1777 | 1779 | 2683 | 1    | 178 | 1992 | 287 |
| cb10213_c19/f1p0/1599                                                                                                                  |                                                                                                                                                                                  |     |      |      |      |      | 2   |      | 6   |
| isoform=cb10213_c19;full_length_coverage=1;non_full_length_coverage=0;isoform_length=1599;expected_accuracy=0.999                      | gnl BL_ORD_ID 48228   cb10213_c5/f1p0/3219                                                                                                                                       | 1   | 1229 | 1225 | 1599 | 8    | 123 | 2789 | 316 |
| cb4174_c3/f1p0/3410                                                                                                                    | gnl BL_ORD_ID 72313   cb4174_c5/f1p0/3191                                                                                                                                        | 131 | 2403 | 2404 | 3149 | 1    | 228 | 2407 | 315 |

|                                                                                                                                                  |                                                                                                                                                              |      |      |      |      |      |          |      |          |
|--------------------------------------------------------------------------------------------------------------------------------------------------|--------------------------------------------------------------------------------------------------------------------------------------------------------------|------|------|------|------|------|----------|------|----------|
|                                                                                                                                                  |                                                                                                                                                              |      |      |      |      |      |          | 4    | 2        |
| cb5267_c6/f1p0/2120<br>isoform=cb5267_c6;full_length_coverage=1;non_full_length_coverage=0;isoform_length=2120;expected_accuracy=0.994           | gnl BL_ORD_ID 73708 cb5267_c7/f1p0/2389                                                                                                                      | 262  | 2084 | 7    | 267  | 435  | 226<br>1 | 1    | 264      |
| cb8564_c46939/f1p1/2926                                                                                                                          | gnl BL_ORD_ID 55246 cb8564_c36343/f1p0/3448                                                                                                                  | 2    | 2134 | 2130 | 2870 | 3    | 216<br>0 | 2265 | 300<br>4 |
| cb8564_c16741/f1p0/2997                                                                                                                          | gnl BL_ORD_ID 52661 cb8564_c10315/f1p0/4512                                                                                                                  | 375  | 3001 | 5    | 375  | 1666 | 429<br>2 | 1    | 371      |
| cb2520_c20/f1p1/2903<br>isoform=cb2520_c20;full_length_coverage=1;non_full_length_coverage=1;isoform_length=2903;expected_accuracy=0.994         | gnl BL_ORD_ID 36518 cb2520_c4/f2p0/3911<br>isoform=cb2520_c4;full_length_coverage=2;non_full_length_coverage=0;isoform_length=3911;expected_accuracy=0.999   | 105  | 2842 | 1    | 106  | 1177 | 3911     | 571  | 676      |
| cb8564_c112175/f2p0/2623<br>isoform=cb8564_c112175;full_length_coverage=2;non_full_length_coverage=0;isoform_length=2623;expected_accuracy=0.996 | gnl BL_ORD_ID 53022 cb8564_c114466/f1p0/3000                                                                                                                 | 1    | 1638 | 1639 | 2623 | 2    | 161<br>0 | 1943 | 292<br>6 |
| cb7257_c2/f1p0/2073<br>isoform=cb7257_c2;full_length_coverage=1;non_full_length_coverage=0;isoform_length=2073;expected_accuracy=0.993           | gnl BL_ORD_ID 51081 cb7257_c0/f1p0/2663                                                                                                                      | 1    | 1564 | 1562 | 2073 | 104  | 167<br>2 | 1776 | 228<br>8 |
| cb5271_c8/f1p2/2641<br>isoform=cb5271_c8;full_length_coverage=1;non_full_length_coverage=2;isoform_length=2641;expected_accuracy=0.994           | gnl BL_ORD_ID 44628 cb5271_c18/f1p2/2761<br>isoform=cb5271_c18;full_length_coverage=1;non_full_length_coverage=2;isoform_length=2761;expected_accuracy=0.991 | 1273 | 2622 | 1    | 1275 | 1419 | 276<br>1 | 1    | 126<br>8 |
| cb548_c122/f43p2/3004                                                                                                                            | gnl BL_ORD_ID 46779 cb548_c109/f1p0/3280                                                                                                                     | 1347 | 3002 | 13   | 1350 | 1551 | 319      | 4    | 134      |



|                                                                                                                                              |                                                                                                                                                                                           |     |      |      |      |      |          |      |          |
|----------------------------------------------------------------------------------------------------------------------------------------------|-------------------------------------------------------------------------------------------------------------------------------------------------------------------------------------------|-----|------|------|------|------|----------|------|----------|
| isoform=cb548_c122;full_length_coverage=43;non_full_length_coverage=2;isoform_length=3004;expected_accuracy=1.000<br>cb6499_c15/f1p1/1972    | isoform=cb548_c109;full_length_coverage=1;non_full_length_coverage=0;isoform_length=3280;expected_accuracy=0.996<br>gnl BL_ORD_ID 4653                      cb6499_c26/f12p0/2255         |     |      |      |      |      | 8        |      | 0        |
| isoform=cb6499_c15;full_length_coverage=1;non_full_length_coverage=1;isoform_length=1972;expected_accuracy=0.994<br>cb1270_c1/f1p0/3702      | isoform=cb6499_c26;full_length_coverage=12;non_full_length_coverage=0;isoform_length=2255;expected_accuracy=1.000<br>gnl BL_ORD_ID 59322   cb1270_c5/f1p0/4305                            | 125 | 1906 | 1    | 126  | 357  | 213<br>8 | 48   | 171      |
| isoform=cb1270_c1;full_length_coverage=1;non_full_length_coverage=0;isoform_length=3702;expected_accuracy=0.998<br>cb4759_c15/f1p0/2126      | gnl BL_ORD_ID 59322   cb1270_c5/f1p0/4305<br><br>gnl BL_ORD_ID 43548                      cb4759_c13/f1p0/2816                                                                            | 1   | 3232 | 3230 | 3631 | 4    | 323<br>7 | 3710 | 4111     |
| isoform=cb4759_c13;full_length_coverage=1;non_full_length_coverage=0;isoform_length=2816;expected_accuracy=1.000<br>cb5538_c7/f1p0/2392      | gnl BL_ORD_ID 43548                      cb4759_c13/f1p0/2816<br>isoform=cb4759_c13;full_length_coverage=1;non_full_length_coverage=0;isoform_length=2816;expected_accuracy=1.000         | 584 | 2096 | 6    | 585  | 1306 | 281<br>6 | 3    | 578      |
| isoform=cb5538_c7;full_length_coverage=1;non_full_length_coverage=0;isoform_length=2392;expected_accuracy=0.993<br>cb12047_c103/f1p1/1531    | gnl BL_ORD_ID 74046   cb5538_c24/f1p0/2729<br><br>gnl BL_ORD_ID 12861                      cb8564_c15921/f1p11/1869                                                                       | 1   | 1488 | 1487 | 2392 | 99   | 158<br>7 | 1833 | 273<br>5 |
| isoform=cb12047_c103;full_length_coverage=1;non_full_length_coverage=11;isoform_length=1869;expected_accuracy=0.993<br>cb12037_c6/f1p0/1610  | gnl BL_ORD_ID 12861                      cb8564_c15921/f1p11/1869<br>isoform=cb8564_c15921;full_length_coverage=1;non_full_length_coverage=11;isoform_length=1869;expected_accuracy=0.993 | 9   | 870  | 865  | 1498 | 3    | 876      | 1171 | 183<br>6 |
| isoform=cb12037_c6;full_length_coverage=1;non_full_length_coverage=0;isoform_length=1610;expected_accuracy=0.993<br>cb8564_c124642/f1p0/2345 | gnl BL_ORD_ID 11654                      cb8564_c124642/f1p0/2345<br>isoform=cb8564_c124642;full_length_coverage=1;non_full_length_coverage=0;isoform_length=2345;expected_accuracy=0.993 | 1   | 1435 | 1434 | 1610 | 165  | 158<br>4 | 2170 | 234<br>5 |

|                                                                                                                                                        |                                                                                                                                                                                  |     |      |      |      |      |      |      |      |
|--------------------------------------------------------------------------------------------------------------------------------------------------------|----------------------------------------------------------------------------------------------------------------------------------------------------------------------------------|-----|------|------|------|------|------|------|------|
| racy=0.993<br>cb4957_c12/flp0/1876<br>isoform=cb4957_c12;full_length_coverage=1;non_full_length_coverage=0;isoform_length=1876;expected_accuracy=1.000 | ccuracy=0.991<br>gnl BL_ORD_ID 41849      cb4957_c1/flp0/3205<br>isoform=cb4957_c1;full_length_coverage=1;non_full_length_coverage=0;isoform_length=3205;expected_accuracy=0.996 | 1   | 1467 | 1468 | 1873 | 74   | 1548 | 2800 | 3205 |
| cb8564_c181074/flp0/2725<br>isoform=cb8564_c181074;full_length_coverage=1;non_full_length_coverage=0;isoform_length=2725;expected_accuracy=1.000       | gnl BL_ORD_ID 17094      cb8564_c78858/flp0/2927<br>isoform=cb8564_c78858;full_length_coverage=1;non_full_length_coverage=0;isoform_length=2927;expected_accuracy=0.995          | 148 | 2698 | 1    | 147  | 378  | 2927 | 1    | 147  |
| cb8564_c118213/f2p0/2393<br>isoform=cb8564_c118213;full_length_coverage=2;non_full_length_coverage=0;isoform_length=2393;expected_accuracy=0.990       | gnl BL_ORD_ID 14369      cb8564_c37858/flp0/2999<br>isoform=cb8564_c37858;full_length_coverage=1;non_full_length_coverage=0;isoform_length=2999;expected_accuracy=0.998          | 370 | 2331 | 9    | 371  | 1047 | 2999 | 18   | 379  |
| cb6097_c42/flp0/1998<br>isoform=cb6097_c42;full_length_coverage=1;non_full_length_coverage=0;isoform_length=1998;expected_accuracy=0.995               | gnl BL_ORD_ID 45264      cb6097_c35/flp0/2775<br>isoform=cb6097_c35;full_length_coverage=1;non_full_length_coverage=0;isoform_length=2775;expected_accuracy=0.999                | 1   | 1526 | 1524 | 1998 | 672  | 2197 | 2303 | 2775 |
| cb8564_c40764/flp0/2563<br>isoform=cb8564_c40764;full_length_coverage=1;non_full_length_coverage=0;isoform_length=2563;expected_accuracy=0.997         | gnl BL_ORD_ID 16473      cb8564_c51923/flp1/2966<br>isoform=cb8564_c51923;full_length_coverage=1;non_full_length_coverage=1;isoform_length=2966;expected_accuracy=0.997          | 1   | 2167 | 2162 | 2563 | 1    | 2176 | 2383 | 2784 |
| cb1178_c27/flp0/1197<br>isoform=cb1178_c27;full_length_coverage=1;non_full_length_coverage=0;isoform_length=1197;expected_accuracy=0.992               | gnl BL_ORD_ID 61143      cb1178_c5/f2p0/1389                                                                                                                                     | 111 | 1181 | 1    | 110  | 321  | 1389 | 97   | 200  |
| cb5447_c3/f5p2/3155                                                                                                                                    | gnl BL_ORD_ID 45897      cb5447_c33/flp0/4199                                                                                                                                    | 19  | 2178 | 2178 | 3155 | 1    | 215  | 2805 | 377  |

|                                                                                                                                       |                                                                                                                                                                                         |      |      |      |      |      |      |      |      |
|---------------------------------------------------------------------------------------------------------------------------------------|-----------------------------------------------------------------------------------------------------------------------------------------------------------------------------------------|------|------|------|------|------|------|------|------|
| isoform=cb5447_c3;full_length_coverage=5;non_full_length_coverage=2;isoform_length=3155;expected_accuracy=1.000<br>cb762_c6/f1p0/3769 | isoform=cb5447_c33;full_length_coverage=1;non_full_length_coverage=0;isoform_length=4199;expected_accuracy=0.997<br>gnl BL_ORD_ID 8132                      cb762_c4/f1p0/4517          |      |      |      |      |      | 5    |      | 8    |
| isoform=cb762_c6;full_length_coverage=1;non_full_length_coverage=0;isoform_length=3769;expected_accuracy=0.993                        | isoform=cb762_c4;full_length_coverage=1;non_full_length_coverage=0;isoform_length=4517;expected_accuracy=0.996<br>gnl BL_ORD_ID 45615                      cb5307_c0/f9p0/3058          | 1    | 2843 | 2841 | 3769 | 48   | 2890 | 3356 | 4284 |
| cb5307_c9/f1p0/2902                                                                                                                   | isoform=cb5307_c0;full_length_coverage=9;non_full_length_coverage=0;isoform_length=3058;expected_accuracy=1.000<br>gnl BL_ORD_ID 15169                      cb8564_c40218/f1p0/3146     | 1204 | 2896 | 1    | 1204 | 1356 | 3048 | 47   | 1248 |
| cb8564_c36731/f1p2/2761                                                                                                               | isoform=cb8564_c40218;full_length_coverage=1;non_full_length_coverage=0;isoform_length=3146;expected_accuracy=0.993                                                                     | 1    | 1977 | 1972 | 2734 | 4    | 1968 | 2394 | 3146 |
| cb3400_c4/f1p0/2972                                                                                                                   | gnl BL_ORD_ID 71172   cb3400_c2/f1p0/3309                                                                                                                                               | 1    | 2653 | 2651 | 2958 | 24   | 2677 | 3011 | 3319 |
| cb8564_c75977/f1p0/2165                                                                                                               | gnl BL_ORD_ID 16147                      cb8564_c77752/f1p1/3809<br>isoform=cb8564_c77752;full_length_coverage=1;non_full_length_coverage=1;isoform_length=3809;expected_accuracy=0.991 | 1    | 1393 | 1394 | 2126 | 60   | 1461 | 2755 | 3521 |
| cb2637_c16/f1p0/1139                                                                                                                  | gnl BL_ORD_ID 39001                      cb2637_c8/f1p0/2971<br>isoform=cb2637_c8;full_length_coverage=1;non_full_length_coverage=0;isoform_length=2971;expected_accuracy=0.992         | 382  | 1139 | 51   | 384  | 1198 | 1958 | 1    | 339  |
| cb3145_c1/f1p0/3709                                                                                                                   | gnl BL_ORD_ID 39003                      cb3145_c2/f1p0/3679                                                                                                                            | 3    | 3016 | 3017 | 3507 | 13   | 302  | 3147 | 363  |

|                                                                                                                      |                                                                                                                 |      |      |      |      |     |      |      |      |
|----------------------------------------------------------------------------------------------------------------------|-----------------------------------------------------------------------------------------------------------------|------|------|------|------|-----|------|------|------|
|                                                                                                                      | isoform=cb3145_c2;full_length_coverage=1;non_full_length_coverage=0;isoform_length=3679;expected_accuracy=0.997 |      |      |      |      |     |      | 5    | 8    |
| cb8564_c22212/f1p0/2530                                                                                              |                                                                                                                 |      |      |      |      |     |      |      |      |
| isoform=cb8564_c22212;full_length_coverage=1;non_full_length_coverage=0;isoform_length=2530;expected_accuracy=0.992  | gnl BL_ORD_ID 52063 cb8564_c11680/f1p1/3676                                                                     | 1    | 2118 | 2113 | 2530 | 22  | 2139 | 2996 | 3413 |
| cb18456_c6530/f1p0/1200                                                                                              | gnl BL_ORD_ID 933 cb10092_c2/f3p19/1736                                                                         |      |      |      |      |     |      |      |      |
| isoform=cb10092_c2;full_length_coverage=3;non_full_length_coverage=19;isoform_length=1736;expected_accuracy=1.000    | 260                                                                                                             | 1166 | 3    | 259  | 803  |     | 1708 | 8    | 272  |
| cb8564_c90797/f1p0/2864                                                                                              | gnl BL_ORD_ID 13313 cb8564_c188075/f1p2/2904                                                                    |      |      |      |      |     |      |      |      |
| isoform=cb8564_c188075;full_length_coverage=1;non_full_length_coverage=2;isoform_length=2904;expected_accuracy=0.996 | 15                                                                                                              | 2313 | 2308 | 2661 | 96   |     | 2393 | 2515 | 2868 |
| cb8564_c129638/f1p0/2479                                                                                             | gnl BL_ORD_ID 52949 cb8564_c112716/f1p0/3223                                                                    | 1    | 1627 | 1623 | 2475 | 20  | 1646 | 2051 | 2924 |
| cb7915_c3/f1p0/1964                                                                                                  | gnl BL_ORD_ID 8620 cb7915_c2/f2p0/2505                                                                          |      |      |      |      |     |      |      |      |
| isoform=cb7915_c3;full_length_coverage=1;non_full_length_coverage=0;isoform_length=1964;expected_accuracy=0.997      | isoform=cb7915_c2;full_length_coverage=2;non_full_length_coverage=0;isoform_length=2505;expected_accuracy=1.000 | 1    | 1547 | 1545 | 1964 | 46  | 1581 | 2065 | 2485 |
| cb8564_c185920/f1p0/2777                                                                                             |                                                                                                                 |      |      |      |      |     |      |      |      |
| isoform=cb8564_c185920;full_length_coverage=1;non_full_length_coverage=0;isoform_length=2777;expected_accuracy=0.996 | gnl BL_ORD_ID 55341 cb8564_c38927/f1p0/3326                                                                     | 174  | 2777 | 1    | 177  | 356 | 2964 | 20   | 197  |
| cb4771_c5/f1p0/2633                                                                                                  | gnl BL_ORD_ID 43536 cb4771_c2/f1p0/3261                                                                         | 311  | 2598 | 87   | 314  | 908 | 318  | 1    | 228  |

|                                                                                                                      |                                                                                                                      |                          |      |      |      |      |      |      |      |     |  |  |
|----------------------------------------------------------------------------------------------------------------------|----------------------------------------------------------------------------------------------------------------------|--------------------------|------|------|------|------|------|------|------|-----|--|--|
|                                                                                                                      | isoform=cb4771_c2;full_length_coverage=1;non_full_length_coverage=0;isoform_length=3261;expected_accuracy=0.996      |                          |      |      |      |      |      |      |      | 7   |  |  |
| cb8564_c43779/f1p0/3021                                                                                              | gnl BL_ORD_ID 17429                                                                                                  | cb8564_c85447/f1p0/3196  |      |      |      |      |      |      |      |     |  |  |
| isoform=cb8564_c43779;full_length_coverage=1;non_full_length_coverage=0;isoform_length=3021;expected_accuracy=0.993  | isoform=cb8564_c85447;full_length_coverage=1;non_full_length_coverage=0;isoform_length=3196;expected_accuracy=0.997  | 1                        | 2344 | 2345 | 3021 | 3    | 2344 | 2522 | 3195 |     |  |  |
| cb8564_c23645/f1p0/2729                                                                                              | gnl BL_ORD_ID 52033                                                                                                  | cb8564_c10646/f1p1/3031  |      |      |      |      |      |      |      |     |  |  |
| cb1770_c13/f1p0/3529                                                                                                 | gnl BL_ORD_ID 33844                                                                                                  | cb1770_c9/f1p0/3711      |      |      |      |      |      |      |      |     |  |  |
| isoform=cb1770_c13;full_length_coverage=1;non_full_length_coverage=0;isoform_length=3529;expected_accuracy=1.000     | isoform=cb1770_c9;full_length_coverage=1;non_full_length_coverage=0;isoform_length=3711;expected_accuracy=0.999      | 1                        | 2029 | 2027 | 3529 | 8    | 2038 | 2199 | 3701 |     |  |  |
| cb8564_c109930/f2p1/2066                                                                                             | gnl BL_ORD_ID 12510                                                                                                  | cb8564_c122775/f1p0/2291 |      |      |      |      |      |      |      |     |  |  |
| isoform=cb8564_c109930;full_length_coverage=2;non_full_length_coverage=1;isoform_length=2066;expected_accuracy=1.000 | isoform=cb8564_c122775;full_length_coverage=1;non_full_length_coverage=0;isoform_length=2291;expected_accuracy=0.995 | 1                        | 1103 | 1101 | 2016 | 2123 | 1020 | 914  | 1    |     |  |  |
| cb9446_c7/f1p0/1576                                                                                                  | gnl BL_ORD_ID 21108                                                                                                  | cb9446_c1/f1p0/1941      |      |      |      |      |      |      |      |     |  |  |
| isoform=cb9446_c7;full_length_coverage=1;non_full_length_coverage=0;isoform_length=1576;expected_accuracy=0.994      | isoform=cb9446_c1;full_length_coverage=1;non_full_length_coverage=0;isoform_length=1941;expected_accuracy=0.996      | 189                      | 1576 | 23   | 194  | 352  | 1737 | 1    | 171  |     |  |  |
| cb8564_c18575/f1p0/1939                                                                                              | gnl BL_ORD_ID 13618                                                                                                  | cb8564_c185222/f1p3/3772 |      |      |      |      |      |      |      |     |  |  |
| isoform=cb8564_c18575;full_length_coverage=1;non_full_length_coverage=0;isoform_length=1939;expected_accuracy=0.990  | isoform=cb8564_c185222;full_length_coverage=1;non_full_length_coverage=3;isoform_length=3772;expected_accuracy=0.997 | 1                        | 1427 | 1422 | 1939 | 824  | 2265 | 3246 | 3772 |     |  |  |
| cb3988_c7/f1p1/3083                                                                                                  | gnl BL_ORD_ID 41321                                                                                                  | cb3988_c1/f1p1/3470      |      |      |      |      |      |      |      |     |  |  |
|                                                                                                                      |                                                                                                                      |                          | 1    | 2003 | 1999 | 3044 | 46   | 205  | 2423 | 347 |  |  |

|                         |                                                                                                                                                                         |     |      |      |      |     |          |      |          |
|-------------------------|-------------------------------------------------------------------------------------------------------------------------------------------------------------------------|-----|------|------|------|-----|----------|------|----------|
|                         | isoform=cb3988_c1;full_length_coverage=1;non_full_length_coverage=1;isoform_length=3470;expected_accuracy=1.000                                                         |     |      |      |      |     |          | 1    | 0        |
| cb8564_c37175/f1p0/3267 | gnl BL_ORD_ID 14738      cb8564_c42029/f1p0/3342<br>isoform=cb8564_c42029;full_length_coverage=1;non_full_length_coverage=0;isoform_length=3342;expected_accuracy=0.998 | 116 | 3184 | 11   | 118  | 270 | 334<br>1 | 13   | 122      |
| cb3449_c13/f1p2/3050    | isoform=cb3449_c13;full_length_coverage=1;non_full_length_coverage=2;isoform_length=3050;expected_accuracy=0.993                                                        |     |      |      |      |     |          |      |          |
| cb7969_c11/f1p0/1950    | gnl BL_ORD_ID 71214      cb3449_c18/f1p2/3268                                                                                                                           | 1   | 2755 | 2752 | 3050 | 2   | 275<br>8 | 2926 | 322<br>0 |
| cb7969_c11/f1p0/1950    | isoform=cb7969_c11;full_length_coverage=1;non_full_length_coverage=0;isoform_length=1950;expected_accuracy=0.992                                                        |     |      |      |      |     |          |      |          |
| cb8564_c73605/f1p0/2967 | gnl BL_ORD_ID 50804      cb7969_c23/f1p0/2373                                                                                                                           | 1   | 1409 | 1405 | 1950 | 69  | 147<br>9 | 1724 | 227<br>0 |
| cb8564_c73605/f1p0/2967 | isoform=cb8564_c73605;full_length_coverage=1;non_full_length_coverage=0;isoform_length=2967;expected_accuracy=0.992                                                     |     |      |      |      |     |          |      |          |
| cb938_c15/f1p0/3219     | gnl BL_ORD_ID 56794      cb8564_c71992/f1p0/3077                                                                                                                        | 1   | 2354 | 2351 | 2870 | 12  | 237<br>5 | 2544 | 306<br>4 |
| cb938_c15/f1p0/3219     | gnl BL_ORD_ID 21551      cb938_c49/f5p1/3515<br>isoform=cb938_c49;full_length_coverage=5;non_full_length_coverage=1;isoform_length=3515;expected_accuracy=1.000         | 1   | 2546 | 2541 | 3227 | 3   | 254<br>9 | 2825 | 3511     |
| cb8564_c35645/f1p0/2804 | gnl BL_ORD_ID 52842      cb8564_c15468/f1p0/3015                                                                                                                        | 150 | 2663 | 1    | 151  | 306 | 281<br>9 | 43   | 193      |
| cb8564_c50089/f1p0/2929 | gnl BL_ORD_ID 56070      cb8564_c54122/f1p1/3367                                                                                                                        | 1   | 2301 | 2301 | 2907 | 45  | 235      | 2651 | 325      |

|                                                                                                                     |                                                                                                                     |     |      |      |      |      |      |      |  |      |
|---------------------------------------------------------------------------------------------------------------------|---------------------------------------------------------------------------------------------------------------------|-----|------|------|------|------|------|------|--|------|
| isoform=cb8564_c50089;full_length_coverage=1;non_full_length_coverage=0;isoform_length=2929;expected_accuracy=0.993 |                                                                                                                     |     |      |      |      |      |      | 0    |  | 8    |
| cb6406_c59/f1p0/2372                                                                                                | gnl BL_ORD_ID 5551                      cb6406_c15/f1p0/2860                                                        |     |      |      |      |      |      |      |  |      |
|                                                                                                                     | isoform=cb6406_c15;full_length_coverage=1;non_full_length_coverage=0;isoform_length=2860;expected_accuracy=0.994    | 841 | 2163 | 9    | 843  | 1539 | 2860 | 1    |  | 836  |
| cb8564_c87256/f1p0/2285                                                                                             |                                                                                                                     |     |      |      |      |      |      |      |  |      |
| isoform=cb8564_c87256;full_length_coverage=1;non_full_length_coverage=0;isoform_length=2285;expected_accuracy=0.992 | gnl BL_ORD_ID 54699      cb8564_c155769/f1p3/2649                                                                   | 1   | 1703 | 1700 | 2285 | 205  | 1910 | 2044 |  | 2636 |
| cb8564_c45609/f1p0/3991                                                                                             | gnl BL_ORD_ID 14247                      cb8564_c45575/f3p6/4033                                                    |     |      |      |      |      |      |      |  |      |
|                                                                                                                     | isoform=cb8564_c45575;full_length_coverage=3;non_full_length_coverage=6;isoform_length=4033;expected_accuracy=0.998 | 260 | 3705 | 1    | 260  | 500  | 3945 | 43   |  | 305  |
| cb912_c15/f1p0/2991                                                                                                 |                                                                                                                     |     |      |      |      |      |      |      |  |      |
| isoform=cb912_c15;full_length_coverage=1;non_full_length_coverage=0;isoform_length=2991;expected_accuracy=0.999     | gnl BL_ORD_ID 59090      cb912_c16/f1p0/3349                                                                        | 1   | 2472 | 2469 | 2859 | 291  | 2763 | 2900 |  | 3290 |
| cb18456_c1776/f1p0/1211                                                                                             | gnl BL_ORD_ID 11429                      cb8564_c1308/f1p7/2249                                                     |     |      |      |      |      |      |      |  |      |
|                                                                                                                     | isoform=cb8564_c1308;full_length_coverage=1;non_full_length_coverage=7;isoform_length=2249;expected_accuracy=0.998  | 280 | 1214 | 6    | 285  | 1311 | 2244 | 921  |  | 1199 |
| cb6757_c12/f1p0/2448                                                                                                |                                                                                                                     |     |      |      |      |      |      |      |  |      |
| isoform=cb6757_c12;full_length_coverage=1;non_full_length_coverage=0;isoform_length=2448;expected_accuracy=0.999    | gnl BL_ORD_ID 50029      cb6757_c6/f1p0/4618                                                                        | 1   | 1299 | 1297 | 2448 | 1    | 1319 | 3410 |  | 4583 |

| racy=0.993              |                                                                                                                                            |                         |      |      |      |      |      |      |      |      |
|-------------------------|--------------------------------------------------------------------------------------------------------------------------------------------|-------------------------|------|------|------|------|------|------|------|------|
| cb7388_c0/f2p0/2378     | gnl BL_ORD_ID 7290<br>isoform=cb7388_c1;full_length_coverage=1;non_full_length_coverage=0;isoform_length=2631;expected_accuracy=0.999      | cb7388_c1/f1p0/2631     | 1    | 1892 | 1891 | 2345 | 54   | 1945 | 2180 | 2631 |
| cb7200_c9/f1p0/2478     | gnl BL_ORD_ID 7319<br>isoform=cb7200_c2;full_length_coverage=3;non_full_length_coverage=1;isoform_length=2679;expected_accuracy=1.000      | cb7200_c2/f3p1/2679     | 526  | 2269 | 6    | 529  | 734  | 2473 | 12   | 535  |
| cb4020_c0/f2p0/2091     | gnl BL_ORD_ID 40368<br>isoform=cb4020_c0;full_length_coverage=2;non_full_length_coverage=0;isoform_length=2091;expected_accuracy=0.998     | cb4020_c3/f1p0/2582     | 1    | 1217 | 1215 | 2091 | 1    | 1239 | 1687 | 2563 |
| cb6181_c4/f3p0/2235     | gnl BL_ORD_ID 5503<br>isoform=cb6181_c4;full_length_coverage=3;non_full_length_coverage=0;isoform_length=2235;expected_accuracy=1.000      | cb6181_c7/f6p0/2362     | 1    | 1513 | 1511 | 2186 | 1    | 1513 | 1687 | 2362 |
| cb8564_c21222/f1p0/4286 | gnl BL_ORD_ID 54171<br>isoform=cb8564_c21222;full_length_coverage=1;non_full_length_coverage=0;isoform_length=4286;expected_accuracy=0.999 | cb8564_c19825/f1p0/4566 | 1949 | 4288 | 1    | 1949 | 2099 | 4438 | 2    | 1950 |
| cb191_c1/f1p2/4439      | gnl BL_ORD_ID 34772<br>isoform=cb191_c1;full_length_coverage=1;non_full_length_coverage=2;isoform_length=4439;expected_accuracy=0.998      | cb191_c15/f1p1/5569     | 1044 | 4439 | 1    | 1044 | 1467 | 4865 | 243  | 1282 |
| cb3285_c19/f1p1/2821    | gnl BL_ORD_ID 41359<br>isoform=cb3285_c14;full_length_coverage=1;non_full_length_coverage=1;isoform_length=3029;expected_accuracy=0.999    | cb3285_c14/f1p1/3029    | 1    | 1702 | 1697 | 2712 | 3    | 1696 | 2013 | 3029 |



|                                                                                                                  |                                                                                                                                                                                      |      |      |      |      |      |          |      |          |
|------------------------------------------------------------------------------------------------------------------|--------------------------------------------------------------------------------------------------------------------------------------------------------------------------------------|------|------|------|------|------|----------|------|----------|
| cb8564_c12600/f1p0/2645                                                                                          | acy=0.997<br>gnl BL_ORD_ID 11921      cb8564_c15088/f2p0/3643<br>isoform=cb8564_c15088;full_length_coverage=2;non_full_length_coverage=0;isoform_length=3643;expected_accuracy=0.994 | 254  | 2645 | 18   | 255  | 341  | 270<br>7 | 1    | 238      |
| cb3557_c31/f1p0/2861                                                                                             | gnl BL_ORD_ID 70455      cb3557_c8/f1p0/3541                                                                                                                                         | 21   | 2233 | 2231 | 2885 | 1    | 221<br>3 | 2767 | 342<br>1 |
| cb15510_c0/f1p0/1378                                                                                             | gnl BL_ORD_ID 41745      cb5048_c10/f4p1/1631<br>isoform=cb5048_c10;full_length_coverage=4;non_full_length_coverage=1;isoform_length=1631;expected_accuracy=1.000                    | 463  | 1314 | 5    | 459  | 677  | 152<br>8 | 1    | 457      |
| cb8564_c85288/f1p2/2983                                                                                          | gnl BL_ORD_ID 11528      cb8564_c146182/f3p2/3172<br>isoform=cb8564_c85288;full_length_coverage=1;non_full_length_coverage=2;isoform_length=2983;expected_accuracy=0.999             | 1    | 2289 | 2289 | 2981 | 41   | 233<br>5 | 2479 | 317<br>2 |
| cb8564_c23232/f1p3/2540                                                                                          | gnl BL_ORD_ID 11957      cb8564_c135981/f1p0/2840<br>isoform=cb8564_c135981;full_length_coverage=1;non_full_length_coverage=0;isoform_length=2840;expected_accuracy=0.992            | 16   | 2172 | 2167 | 2518 | 193  | 234<br>2 | 2445 | 279<br>4 |
| cb2918_c13/f2p0/2549                                                                                             | isoform=cb2918_c13;full_length_coverage=2;non_full_length_coverage=0;isoform_length=2549;expected_accuracy=1.000                                                                     |      |      |      |      |      |          |      |          |
| cb2836_c20/f1p2/3269                                                                                             | gnl BL_ORD_ID 68997      cb2918_c66/f1p0/3035                                                                                                                                        | 1080 | 2536 | 1    | 1082 | 1578 | 303<br>4 | 60   | 1141     |
| isoform=cb2836_c20;full_length_coverage=1;non_full_length_coverage=2;isoform_length=3269;expected_accuracy=1.000 | gnl BL_ORD_ID 68925      cb2836_c11/f1p0/3675                                                                                                                                        | 1    | 2389 | 2390 | 3141 | 170  | 255<br>9 | 2666 | 341<br>8 |

|                                                                                                                                                                |                                                                                                                                                                           |      |      |      |      |      |      |      |      |
|----------------------------------------------------------------------------------------------------------------------------------------------------------------|---------------------------------------------------------------------------------------------------------------------------------------------------------------------------|------|------|------|------|------|------|------|------|
| racy=0.993<br>cb8564_c129154/f1p0/2632<br>isoform=cb8564_c129154;full_length_coverage=1;non_full_length_coverage=0;isoform_length=2632;expected_accuracy=0.997 | gnl BL_ORD_ID 10296      cb8564_c116976/f1p0/2943<br>isoform=cb8564_c116976;full_length_coverage=1;non_full_length_coverage=0;isoform_length=2943;expected_accuracy=0.997 | 1    | 1586 | 1587 | 2601 | 15   | 1584 | 1927 | 2941 |
| cb2818_c78/f1p0/2043<br>isoform=cb2818_c78;full_length_coverage=1;non_full_length_coverage=0;isoform_length=2043;expected_accuracy=0.992                       | gnl BL_ORD_ID 68899      cb2818_c34/f1p0/3053                                                                                                                             | 1    | 1936 | 1935 | 2041 | 488  | 2420 | 2815 | 2923 |
| cb2985_c4/f1p0/3241<br>isoform=cb2985_c4;full_length_coverage=1;non_full_length_coverage=0;isoform_length=3241;expected_accuracy=0.994                         | gnl BL_ORD_ID 36841      cb2985_c2/f4p2/3365<br>isoform=cb2985_c2;full_length_coverage=4;non_full_length_coverage=2;isoform_length=3365;expected_accuracy=1.000           | 10   | 1966 | 1967 | 3175 | 1    | 1952 | 2158 | 3365 |
| cb8564_c8764/f7p3/3755<br>isoform=cb8564_c8764;full_length_coverage=7;non_full_length_coverage=3;isoform_length=3755;expected_accuracy=1.000                   | gnl BL_ORD_ID 54306      cb8564_c22128/f1p2/3973                                                                                                                          | 1    | 3056 | 3056 | 3755 | 1    | 3055 | 3213 | 3912 |
| cb1772_c14/f1p0/2582                                                                                                                                           | gnl BL_ORD_ID 63938      cb1772_c19/f1p0/4042                                                                                                                             | 1    | 2321 | 2318 | 2564 | 108  | 2429 | 3670 | 3916 |
| cb8564_c5115/f1p1/3855                                                                                                                                         | gnl BL_ORD_ID 15705      cb8564_c5095/f1p0/3793<br>isoform=cb8564_c5095;full_length_coverage=1;non_full_length_coverage=0;isoform_length=3793;expected_accuracy=0.995     | 1523 | 3639 | 1    | 1524 | 1673 | 3791 | 1    | 1523 |
| cb191_c1/f1p2/4439<br>isoform=cb191_c1;full_length_coverage=1;non_full_length_coverage=2;isoform_length=4439;expected_accuracy=0.995                           | gnl BL_ORD_ID 66308      cb191_c14/f1p0/5848                                                                                                                              | 1044 | 4439 | 1    | 1044 | 1520 | 4918 | 291  | 1334 |

|                                                                                                                    |                                                                                                                       |                           |      |      |      |      |      |      |      |      |  |
|--------------------------------------------------------------------------------------------------------------------|-----------------------------------------------------------------------------------------------------------------------|---------------------------|------|------|------|------|------|------|------|------|--|
| y=0.998                                                                                                            |                                                                                                                       |                           |      |      |      |      |      |      |      |      |  |
| cb8564_c36731/f1p2/2761                                                                                            | gnl BL_ORD_ID 53680                                                                                                   | cb8564_c153222/f2p39/3454 | 1    | 1977 | 1972 | 2726 | 7    | 1986 | 2415 | 3170 |  |
| cb99_c12/f1p0/3017                                                                                                 | gnl BL_ORD_ID 21972                                                                                                   | cb99_c4/f1p1/4938         |      |      |      |      |      |      |      |      |  |
| isoform=cb99_c12;full_length_coverage=1;non_full_length_coverage=0;isoform_length=3017;expected_accuracy=0.997     | isoform=cb99_c4;full_length_coverage=1;non_full_length_coverage=1;isoform_length=4938;expected_accuracy=0.999         |                           | 1    | 2761 | 2758 | 2979 | 1764 | 4527 | 4718 | 4938 |  |
| cb6291_c3/f1p0/2781                                                                                                | gnl BL_ORD_ID 4113                                                                                                    | cb6291_c0/f2p0/2911       |      |      |      |      |      |      |      |      |  |
| isoform=cb6291_c3;full_length_coverage=1;non_full_length_coverage=0;isoform_length=2781;expected_accuracy=0.992    | isoform=cb6291_c0;full_length_coverage=2;non_full_length_coverage=0;isoform_length=2911;expected_accuracy=0.997       |                           | 192  | 2754 | 1    | 191  | 343  | 2911 | 30   | 224  |  |
| cb8564_c54518/f1p0/2781                                                                                            | gnl BL_ORD_ID 12978                                                                                                   | cb8564_c175946/f10p1/3002 |      |      |      |      |      |      |      |      |  |
|                                                                                                                    | isoform=cb8564_c175946;full_length_coverage=10;non_full_length_coverage=1;isoform_length=3002;expected_accuracy=1.000 |                           | 1    | 1587 | 1584 | 2793 | 34   | 1620 | 1754 | 2963 |  |
| cb8564_c7294/f1p0/2355                                                                                             | gnl BL_ORD_ID 15303                                                                                                   | cb8564_c3481/f1p0/2830    |      |      |      |      |      |      |      |      |  |
| isoform=cb8564_c7294;full_length_coverage=1;non_full_length_coverage=0;isoform_length=2355;expected_accuracy=0.997 | isoform=cb8564_c3481;full_length_coverage=1;non_full_length_coverage=0;isoform_length=2830;expected_accuracy=0.995    |                           | 1    | 1678 | 1674 | 2331 | 8    | 1676 | 2158 | 2814 |  |
| cb8564_c5245/f7p0/2048                                                                                             | gnl BL_ORD_ID 15463                                                                                                   | cb8564_c5246/f1p0/2196    |      |      |      |      |      |      |      |      |  |
| isoform=cb8564_c5245;full_length_coverage=7;non_full_length_coverage=0;isoform_length=2048;expected_accuracy=1.000 | isoform=cb8564_c5246;full_length_coverage=1;non_full_length_coverage=0;isoform_length=2196;expected_accuracy=0.993    |                           | 16   | 1641 | 1641 | 2047 | 1    | 1655 | 1787 | 2196 |  |
| cb14_c28/f1p0/3251                                                                                                 | gnl BL_ORD_ID 27787                                                                                                   | cb14_c30/f1p0/3711        |      |      |      |      |      |      |      |      |  |
| isoform=cb14_c28;full_length_coverage=1;non_full_length_coverage=0;isoform_length=3251;expected_accuracy=0.998     | isoform=cb14_c30;full_length_coverage=1;non_full_length_coverage=0;isoform_length=3711;expected_accuracy=0.998        |                           | 1158 | 3210 | 1    | 1161 | 1667 | 3711 | 3    | 1156 |  |

|                                                                                                                                                     |                                                                                                                                                                              |     |      |      |      |      |      |      |      |
|-----------------------------------------------------------------------------------------------------------------------------------------------------|------------------------------------------------------------------------------------------------------------------------------------------------------------------------------|-----|------|------|------|------|------|------|------|
| y=0.991<br>cb18848_c1/f1p2/5728<br>isoform=cb18848_c1;full_length_coverage=1;non_full_length_coverage=2;isoform_length=5728;expected_accuracy=1.000 | y=0.996<br>gnl BL_ORD_ID 36294      cb18848_c0/f1p0/5897<br>isoform=cb18848_c0;full_length_coverage=1;non_full_length_coverage=0;isoform_length=5897;expected_accuracy=0.996 | 1   | 5222 | 5223 | 5727 | 5    | 5227 | 5393 | 5897 |
| cb8564_c39136/f1p0/3036<br>isoform=cb8564_c39136;full_length_coverage=1;non_full_length_coverage=0;isoform_length=3036;expected_accuracy=0.998      | gnl BL_ORD_ID 16447      cb8564_c47202/f1p0/3195<br>isoform=cb8564_c47202;full_length_coverage=1;non_full_length_coverage=0;isoform_length=3195;expected_accuracy=0.996      | 1   | 2089 | 2085 | 3033 | 1    | 2096 | 2223 | 3195 |
| cb584_c43/f3p1/3426<br>isoform=cb584_c43;full_length_coverage=3;non_full_length_coverage=1;isoform_length=3426;expected_accuracy=1.000              | gnl BL_ORD_ID 72281      cb584_c8/f1p0/4733                                                                                                                                  | 175 | 3426 | 1    | 180  | 1496 | 4749 | 42   | 221  |
| cb9773_c9/f1p0/2060                                                                                                                                 | gnl BL_ORD_ID 58880      cb9773_c6/f1p0/2971                                                                                                                                 | 551 | 2015 | 60   | 554  | 1506 | 2987 | 3    | 501  |
| cb6106_c25/f1p0/2002                                                                                                                                | gnl BL_ORD_ID 45790      cb6106_c5/f1p0/2598<br>isoform=cb6106_c5;full_length_coverage=1;non_full_length_coverage=0;isoform_length=2598;expected_accuracy=0.997              | 1   | 1332 | 1329 | 1992 | 12   | 1342 | 1935 | 2598 |
| cb13985_c12/f5p0/1453<br>isoform=cb13985_c12;full_length_coverage=5;non_full_length_coverage=0;isoform_length=1453;expected_accuracy=1.000          | gnl BL_ORD_ID 62962      cb13985_c10/f1p0/1780                                                                                                                               | 186 | 1453 | 23   | 190  | 349  | 1616 | 1    | 165  |
| cb8909_c12/f1p0/1836<br>isoform=cb8909_c12;full_length_coverage=1;non_full_length_coverage=0;isoform_length=1836;expected_accuracy=1.000            | gnl BL_ORD_ID 20551      cb8909_c3/f2p0/1945<br>isoform=cb8909_c3;full_length_coverage=2;non_full_length_coverage=0;isoform_length=1945;expected_accuracy=1.000              | 1   | 1624 | 1620 | 1836 | 1    | 1625 | 1726 | 1945 |

|                         |                                                                                                                                                                         |     |      |      |      |      |          |      |          |  |  |
|-------------------------|-------------------------------------------------------------------------------------------------------------------------------------------------------------------------|-----|------|------|------|------|----------|------|----------|--|--|
| racy=1.000              | cy=1.000                                                                                                                                                                |     |      |      |      |      |          |      |          |  |  |
| cb8564_c40598/f1p4/3119 | gnl BL_ORD_ID 14838      cb8564_c34060/f2p0/3214<br>isoform=cb8564_c34060;full_length_coverage=2;non_full_length_coverage=0;isoform_length=3214;expected_accuracy=0.993 | 1   | 2732 | 2729 | 3051 | 6    | 277<br>2 | 2893 | 321<br>4 |  |  |
| cb9146_c8/f1p0/1115     | gnl BL_ORD_ID 20475      cb9146_c4/f1p0/1288<br>isoform=cb9146_c8;full_length_coverage=1;non_full_length_coverage=0;isoform_length=1115;expected_accuracy=0.991         | 101 | 1100 | 1    | 101  | 263  | 128<br>8 | 59   | 159      |  |  |
| cb8564_c89014/f1p0/2743 | gnl BL_ORD_ID 15942      cb8564_c77573/f2p2/2771<br>isoform=cb8564_c77573;full_length_coverage=2;non_full_length_coverage=2;isoform_length=2771;expected_accuracy=1.000 | 14  | 1755 | 1753 | 2457 | 1    | 174<br>7 | 1880 | 258<br>4 |  |  |
| cb8564_c85953/f1p0/2986 | gnl BL_ORD_ID 17094      cb8564_c78858/f1p0/2927<br>isoform=cb8564_c78858;full_length_coverage=1;non_full_length_coverage=0;isoform_length=2927;expected_accuracy=0.995 | 175 | 2717 | 1    | 176  | 378  | 291<br>8 | 1    | 176      |  |  |
| cb18409_c75/f1p0/1035   | gnl BL_ORD_ID 56968      cb8564_c78887/f1p0/2186<br>isoform=cb18409_c75;full_length_coverage=1;non_full_length_coverage=0;isoform_length=1035;expected_accuracy=0.995   | 109 | 1035 | 2    | 112  | 1195 | 212<br>2 | 3    | 116      |  |  |
| cb3135_c4/f1p0/3711     | gnl BL_ORD_ID 38272      cb3135_c6/f1p0/3675<br>isoform=cb3135_c6;full_length_coverage=1;non_full_length_coverage=0;isoform_length=3675;expected_accuracy=0.997         | 103 | 3050 | 3049 | 3417 | 1    | 293<br>8 | 3300 | 366<br>6 |  |  |
| cb9718_c43/f1p0/1655    | gnl BL_ORD_ID 59924      cb9718_c9/f1p10/1998                                                                                                                           | 288 | 1655 | 3    | 290  | 389  | 175      | 2    | 289      |  |  |

|                                                                                                                     |                                                                                                                  |                          |     |      |      |      |     |      |      |      |
|---------------------------------------------------------------------------------------------------------------------|------------------------------------------------------------------------------------------------------------------|--------------------------|-----|------|------|------|-----|------|------|------|
| isoform=cb9718_c43;full_length_coverage=1;non_full_length_coverage=0;isoform_length=1655;expected_accuracy=0.996    |                                                                                                                  |                          |     |      |      |      |     |      |      | 6    |
| cb14183_c4/f1p0/1000                                                                                                | gnl BL_ORD_ID 25904                                                                                              | cb14183_c1/f3p1/1153     |     |      |      |      |     |      |      |      |
| isoform=cb14183_c4;full_length_coverage=1;non_full_length_coverage=0;isoform_length=1000;expected_accuracy=0.997    | isoform=cb14183_c1;full_length_coverage=3;non_full_length_coverage=1;isoform_length=1153;expected_accuracy=1.000 |                          | 118 | 972  | 1    | 122  | 300 | 1153 | 7    | 129  |
| cb3449_c13/f1p2/3050                                                                                                | gnl BL_ORD_ID 71217                                                                                              | cb3449_c38/f1p0/3430     |     |      |      |      |     |      |      |      |
| isoform=cb3449_c13;full_length_coverage=1;non_full_length_coverage=2;isoform_length=3050;expected_accuracy=0.993    |                                                                                                                  |                          | 1   | 2755 | 2752 | 3047 | 100 | 2855 | 3023 | 3319 |
| cb2643_c10/f1p0/2833                                                                                                | gnl BL_ORD_ID 68664                                                                                              | cb2643_c13/f1p0/3261     |     |      |      |      |     |      |      |      |
| isoform=cb2643_c10;full_length_coverage=1;non_full_length_coverage=0;isoform_length=2833;expected_accuracy=0.998    |                                                                                                                  |                          | 1   | 2279 | 2274 | 2833 | 11  | 2293 | 2651 | 3210 |
| cb10971_c2/f1p0/1762                                                                                                | gnl BL_ORD_ID 652                                                                                                | cb10971_c0/f1p1/1867     |     |      |      |      |     |      |      |      |
|                                                                                                                     | isoform=cb10971_c0;full_length_coverage=1;non_full_length_coverage=1;isoform_length=1867;expected_accuracy=0.996 |                          | 328 | 1710 | 8    | 331  | 490 | 1867 | 39   | 362  |
| cb8564_c18096/f1p0/2378                                                                                             | gnl BL_ORD_ID 56138                                                                                              | cb8564_c70645/f1p0/3759  |     |      |      |      |     |      |      |      |
| isoform=cb8564_c18096;full_length_coverage=1;non_full_length_coverage=0;isoform_length=2378;expected_accuracy=1.000 |                                                                                                                  |                          | 1   | 2058 | 2059 | 2378 | 685 | 2770 | 3007 | 3331 |
| cb8564_c46939/f1p1/2926                                                                                             | gnl BL_ORD_ID 58037                                                                                              | cb8564_c87188/f1p1/3426  |     |      |      |      |     |      |      |      |
|                                                                                                                     |                                                                                                                  |                          | 21  | 2134 | 2130 | 2870 | 127 | 2249 | 2354 | 3095 |
| cb8564_c125018/f1p0/3452                                                                                            | gnl BL_ORD_ID 10275                                                                                              | cb8564_c109614/f3p0/3516 |     |      |      |      |     |      |      |      |
|                                                                                                                     |                                                                                                                  |                          | 30  | 3167 | 3167 | 3435 | 3   | 313  | 3251 | 351  |

|                                                                                                                                             |                                                                                                                                                                                      |      |      |      |      |      |      |      |      |
|---------------------------------------------------------------------------------------------------------------------------------------------|--------------------------------------------------------------------------------------------------------------------------------------------------------------------------------------|------|------|------|------|------|------|------|------|
| isoform=cb8564_c125018;full_length_coverage=1;non_full_length_coverage=0;isoform_length=3452;expected_accuracy=0.993<br>cb191_c1/f1p2/4439  | isoform=cb8564_c109614;full_length_coverage=3;non_full_length_coverage=0;isoform_length=3516;expected_accuracy=0.997<br>gnl BL_ORD_ID 34867                      cb191_c7/f1p1/4776  |      |      |      |      |      | 8    |      | 6    |
| isoform=cb191_c1;full_length_coverage=1;non_full_length_coverage=2;isoform_length=4439;expected_accuracy=0.998<br>cb18456_c6478/f1p2/1469   | isoform=cb191_c7;full_length_coverage=1;non_full_length_coverage=1;isoform_length=4776;expected_accuracy=0.994<br>gnl BL_ORD_ID 17669                      cb8564_c868/f2p9/1907     | 1044 | 4430 | 1    | 1044 | 1409 | 4776 | 188  | 1223 |
| isoform=cb18456_c6478;full_length_coverage=1;non_full_length_coverage=2;isoform_length=1469;expected_accuracy=0.992<br>cb6645_c4/f1p0/1775  | isoform=cb8564_c868;full_length_coverage=2;non_full_length_coverage=9;isoform_length=1907;expected_accuracy=1.000<br>gnl BL_ORD_ID 3658                      cb6645_c0/f1p0/2792     | 289  | 1469 | 4    | 289  | 690  | 1867 | 1    | 285  |
| isoform=cb6645_c4;full_length_coverage=1;non_full_length_coverage=0;isoform_length=1775;expected_accuracy=0.993<br>cb8983_c35/f1p0/1566     | isoform=cb6645_c0;full_length_coverage=1;non_full_length_coverage=0;isoform_length=2792;expected_accuracy=0.996<br>gnl BL_ORD_ID 21824                      cb8983_c25/f1p0/1857     | 447  | 1774 | 64   | 451  | 567  | 1896 | 7    | 396  |
| isoform=cb8983_c35;full_length_coverage=1;non_full_length_coverage=0;isoform_length=1566;expected_accuracy=0.999<br>cb8564_c75626/f1p2/3199 | isoform=cb8983_c25;full_length_coverage=1;non_full_length_coverage=0;isoform_length=1857;expected_accuracy=0.995<br>gnl BL_ORD_ID 10307                      cb8564_c11483/f8p0/3482 | 116  | 1564 | 1    | 118  | 291  | 1738 | 42   | 161  |
| isoform=cb8564_c11483;full_length_coverage=8;non_full_length_coverage=0;isoform_length=3482;expected_accuracy=0.996<br>cb1333_c9/f4p0/1480  | isoform=cb8564_c11483;full_length_coverage=8;non_full_length_coverage=0;isoform_length=3482;expected_accuracy=0.996<br>gnl BL_ORD_ID 26228                      cb1333_c50/f1p0/4810 | 1    | 2674 | 2672 | 3182 | 1    | 2673 | 2972 | 3482 |
| isoform=cb1333_c9;full_length_coverage=4;non_full_length_coverage=0;isoform_length=1480;expected_accuracy=0.999                             | isoform=cb1333_c50;full_length_coverage=1;non_full_length_coverage=0;isoform_length=4810;expected_accuracy=0.999                                                                     | 153  | 1460 | 8    | 154  | 3506 | 4810 | 1    | 146  |

|                                                                                                                                                   |                                                                                                                                                                                              |      |      |      |      |      |      |      |      |
|---------------------------------------------------------------------------------------------------------------------------------------------------|----------------------------------------------------------------------------------------------------------------------------------------------------------------------------------------------|------|------|------|------|------|------|------|------|
| acy=1.000<br>cb124_c2/f4p0/2458<br>isoform=cb124_c2;full_length_coverage=4;non_full_length_coverage=0;isoform_length=2458;expected_accuracy=0.998 | acy=0.996<br>gnl BL_ORD_ID 22719                      cb124_c29/f1p0/2489<br>isoform=cb124_c29;full_length_coverage=1;non_full_length_coverage=0;isoform_length=2489;expected_accuracy=0.992 | 215  | 2353 | 1    | 217  | 353  | 2489 | 5    | 222  |
| cb4128_c19/f1p0/2260                                                                                                                              | gnl BL_ORD_ID 70785   cb4128_c21/f1p0/3017                                                                                                                                                   | 1    | 1761 | 1760 | 2263 | 2    | 1760 | 2096 | 2600 |
| cb4077_c12/f1p0/1303<br>isoform=cb4077_c12;full_length_coverage=1;non_full_length_coverage=0;isoform_length=1303;expected_accuracy=0.991          | gnl BL_ORD_ID 41226                      cb4077_c18/f3p0/3453<br>isoform=cb4077_c18;full_length_coverage=3;non_full_length_coverage=0;isoform_length=3453;expected_accuracy=0.997            | 115  | 1303 | 1    | 114  | 2222 | 3408 | 9    | 121  |
| cb8564_c188193/f1p0/2849<br>isoform=cb8564_c188193;full_length_coverage=1;non_full_length_coverage=0;isoform_length=2849;expected_accuracy=0.997  | gnl BL_ORD_ID 16705                      cb8564_c53880/f1p0/3484<br>isoform=cb8564_c53880;full_length_coverage=1;non_full_length_coverage=0;isoform_length=3484;expected_accuracy=0.996      | 1056 | 2849 | 1    | 1057 | 1672 | 3484 | 1    | 1056 |
| cb1203_c25/f1p0/1362                                                                                                                              | gnl BL_ORD_ID 59261   cb1203_c4/f1p0/4549                                                                                                                                                    | 157  | 1269 | 3    | 157  | 3251 | 4363 | 2268 | 2422 |
| cb5472_c0/f1p0/3101                                                                                                                               | gnl BL_ORD_ID 73415   cb5472_c10/f1p0/4117                                                                                                                                                   | 22   | 2674 | 2674 | 3073 | 1    | 2652 | 3683 | 4082 |
| cb8564_c34195/f2p1/2830<br>isoform=cb8564_c34195;full_length_coverage=2;non_full_length_coverage=1;isoform_length=2830;expected_accuracy=0.997    | gnl BL_ORD_ID 11240                      cb8564_c145553/f1p3/3270<br>isoform=cb8564_c145553;full_length_coverage=1;non_full_length_coverage=3;isoform_length=3270;expected_accuracy=0.996    | 1    | 1725 | 1726 | 2830 | 29   | 1757 | 2144 | 3248 |
| cb8564_c53806/f1p3/3974<br>isoform=cb8564_c53806;full_length_coverage=1;non_full_length_coverage=3;isoform_length=3974;expected_                  | gnl BL_ORD_ID 14293                      cb8564_c46212/f3p1/4373<br>isoform=cb8564_c46212;full_length_coverage=3;non_full_length_coverage=1;isoform_length=4373;expected_ac                  | 1    | 3174 | 3170 | 3974 | 15   | 3160 | 3424 | 4227 |



|                                                                                                                                                                    |                                                                                                                                                                    |     |      |      |      |      |     |      |     |
|--------------------------------------------------------------------------------------------------------------------------------------------------------------------|--------------------------------------------------------------------------------------------------------------------------------------------------------------------|-----|------|------|------|------|-----|------|-----|
| accuracy=0.990<br>cb8564_c181853/f1p0/2119<br>isoform=cb8564_c181853;full_length_coverage=1;non_full_length_coverage=0;isoform_length=2119;expected_accuracy=0.997 | curacy=0.999<br>gnl BL_ORD_ID 55327 cb8564_c38462/f1p0/3241                                                                                                        | 1   | 1339 | 1334 | 2118 | 1    | 133 | 2159 | 294 |
| cb4740_c2/f4p0/2097<br>isoform=cb4740_c2;full_length_coverage=4;non_full_length_coverage=0;isoform_length=2097;expected_accuracy=1.000                             | gnl BL_ORD_ID 42535 cb4740_c9/f1p0/3072<br>isoform=cb4740_c9;full_length_coverage=1;non_full_length_coverage=0;isoform_length=3072;expected_accuracy=0.992         | 1   | 1277 | 1276 | 2097 | 72   | 134 | 2252 | 307 |
| cb4233_c84/f1p1/2344                                                                                                                                               | gnl BL_ORD_ID 44054 cb4233_c238/f63p1/2736<br>isoform=cb4233_c238;full_length_coverage=63;non_full_length_coverage=1;isoform_length=2736;expected_accuracy=1.000   | 227 | 2370 | 1    | 225  | 593  | 273 | 569  | 793 |
| cb8564_c36056/f1p0/2652<br>isoform=cb8564_c36056;full_length_coverage=1;non_full_length_coverage=0;isoform_length=2652;expected_accuracy=0.999                     | gnl BL_ORD_ID 17161 cb8564_c87466/f1p1/3006<br>isoform=cb8564_c87466;full_length_coverage=1;non_full_length_coverage=1;isoform_length=3006;expected_accuracy=0.994 | 248 | 2652 | 1    | 251  | 474  | 290 | 73   | 329 |
| cb8564_c24777/f1p3/2493<br>isoform=cb8564_c24777;full_length_coverage=1;non_full_length_coverage=3;isoform_length=2493;expected_accuracy=0.997                     | gnl BL_ORD_ID 54302 cb8564_c22058/f1p5/3725                                                                                                                        | 511 | 2478 | 7    | 511  | 1750 | 371 | 1127 | 163 |
| cb8976_c4/f1p0/1816<br>isoform=cb8976_c4;full_length_coverage=1;non_full_length_coverage=0;isoform_length=1816;expected_accuracy=0.992                             | gnl BL_ORD_ID 20719 cb8976_c2/f1p0/1978<br>isoform=cb8976_c2;full_length_coverage=1;non_full_length_coverage=0;isoform_length=1978;expected_accuracy=0.995         | 1   | 1033 | 1028 | 1799 | 42   | 107 | 1210 | 197 |
| cb8564_c178335/f1p2/3430                                                                                                                                           | gnl BL_ORD_ID 11650 cb8564_c152526/f1p6/3802                                                                                                                       | 1   | 3015 | 3016 | 3430 | 1    | 301 | 3282 | 369 |

|                                                                                                                                                |                                                                                                                                                                                      |      |      |      |      |      |      |      |      |
|------------------------------------------------------------------------------------------------------------------------------------------------|--------------------------------------------------------------------------------------------------------------------------------------------------------------------------------------|------|------|------|------|------|------|------|------|
| isoform=cb8564_c178335;full_length_coverage=1;non_full_length_coverage=2;isoform_length=3430;expected_accuracy=0.998<br>cb4074_c3/f2p1/2503    | isoform=cb8564_c152526;full_length_coverage=1;non_full_length_coverage=6;isoform_length=3802;expected_accuracy=0.999<br>gnl BL_ORD_ID 39766                      cb4074_c7/f1p1/2826 |      |      |      |      |      | 5    |      | 5    |
| isoform=cb4074_c3;full_length_coverage=2;non_full_length_coverage=1;isoform_length=2503;expected_accuracy=1.000<br>cb8564_c49341/f1p0/2817     | isoform=cb4074_c7;full_length_coverage=1;non_full_length_coverage=1;isoform_length=2826;expected_accuracy=0.994<br>gnl BL_ORD_ID 13884                      cb8564_c37104/f1p0/2985  | 1    | 1336 | 1332 | 2383 | 4    | 1335 | 1781 | 2826 |
| isoform=cb8564_c49341;full_length_coverage=1;non_full_length_coverage=0;isoform_length=2817;expected_accuracy=0.992<br>cb8564_c41756/f1p0/2738 | isoform=cb8564_c37104;full_length_coverage=1;non_full_length_coverage=0;isoform_length=2985;expected_accuracy=0.997<br>gnl BL_ORD_ID 56601   cb8564_c48153/f1p0/3083                 | 824  | 2817 | 97   | 825  | 962  | 2963 | 129  | 861  |
| isoform=cb8564_c41756;full_length_coverage=1;non_full_length_coverage=0;isoform_length=2738;expected_accuracy=0.996<br>cb2013_c10/f1p0/3941    | gnl BL_ORD_ID 35460                      cb2013_c8/f1p0/4696<br>isoform=cb2013_c8;full_length_coverage=1;non_full_length_coverage=0;isoform_length=4696;expected_accuracy=0.993      | 1    | 2173 | 2170 | 2738 | 13   | 2188 | 2311 | 2879 |
| cb7642_c192/f1p0/1882                                                                                                                          | gnl BL_ORD_ID 6565                      cb7642_c134/f1p0/2352<br>isoform=cb7642_c134;full_length_coverage=1;non_full_length_coverage=0;isoform_length=2352;expected_accuracy=0.995   | 1    | 3096 | 3091 | 3774 | 2    | 3089 | 4012 | 4693 |
| isoform=cb7642_c192;full_length_coverage=1;non_full_length_coverage=0;isoform_length=1882;expected_accuracy=0.996<br>cb8564_c44681/f1p0/2675   | gnl BL_ORD_ID 58097   cb8564_c88764/f1p0/2888                                                                                                                                        | 1    | 1625 | 1626 | 1882 | 5    | 1629 | 2016 | 2272 |
| cb3981_c8/f1p0/2246                                                                                                                            | gnl BL_ORD_ID 71697   cb3981_c10/f1p0/3478                                                                                                                                           | 1105 | 2685 | 1    | 1110 | 1291 | 2873 | 61   | 1170 |
|                                                                                                                                                |                                                                                                                                                                                      | 141  | 2246 | 1    | 145  | 1154 | 325  | 4    | 154  |

|                                                                                                                 |                     |                         |                                                                                                                     |     |      |      |      |     |      |      |      |
|-----------------------------------------------------------------------------------------------------------------|---------------------|-------------------------|---------------------------------------------------------------------------------------------------------------------|-----|------|------|------|-----|------|------|------|
| isoform=cb3981_c8;full_length_coverage=1;non_full_length_coverage=0;isoform_length=2246;expected_accuracy=0.995 |                     |                         |                                                                                                                     |     |      |      |      |     | 8    |      |      |
| cb5013_c16/f1p0/2722                                                                                            | gnl BL_ORD_ID 43895 | cb5013_c25/f5p0/2757    | isoform=cb5013_c25;full_length_coverage=5;non_full_length_coverage=0;isoform_length=2757;expected_accuracy=1.000    | 231 | 2544 | 12   | 232  | 444 | 2757 | 1    | 222  |
| cb4269_c10/f1p0/1931                                                                                            | gnl BL_ORD_ID 43569 | cb4269_c3/f2p0/2105     | isoform=cb4269_c3;full_length_coverage=2;non_full_length_coverage=0;isoform_length=2105;expected_accuracy=0.997     | 129 | 1931 | 1    | 130  | 298 | 2098 | 1    | 116  |
| cb8564_c40764/f1p0/2563                                                                                         | gnl BL_ORD_ID 15153 | cb8564_c36883/f1p0/3072 | isoform=cb8564_c36883;full_length_coverage=1;non_full_length_coverage=0;isoform_length=3072;expected_accuracy=0.996 | 1   | 2167 | 2162 | 2562 | 1   | 2165 | 2372 | 2772 |
| cb8564_c48473/f1p2/2701                                                                                         | gnl BL_ORD_ID 18962 | cb8564_c79723/f1p6/3025 | isoform=cb8564_c79723;full_length_coverage=1;non_full_length_coverage=6;isoform_length=3025;expected_accuracy=0.999 | 220 | 2661 | 1    | 225  | 585 | 3025 | 216  | 441  |
| cb2351_c2/f1p0/2558                                                                                             | gnl BL_ORD_ID 68453 | cb2351_c0/f1p0/3992     |                                                                                                                     | 1   | 2093 | 2092 | 2558 | 26  | 2119 | 3014 | 3480 |
| cb3354_c4/f1p0/1508                                                                                             | gnl BL_ORD_ID 40592 | cb3354_c3/f1p0/2584     | isoform=cb3354_c3;full_length_coverage=1;non_full_length_coverage=0;isoform_length=2584;expected_accuracy=0.995     | 1   | 1116 | 1116 | 1476 | 94  | 1213 | 2093 | 2453 |



|                                                                                                                                                  |                                                                                                                                                                         |     |      |      |      |      |          |      |          |   |
|--------------------------------------------------------------------------------------------------------------------------------------------------|-------------------------------------------------------------------------------------------------------------------------------------------------------------------------|-----|------|------|------|------|----------|------|----------|---|
|                                                                                                                                                  |                                                                                                                                                                         |     |      |      |      |      |          |      |          | 5 |
| cb8564_c48661/f1p2/2634<br>isoform=cb8564_c48661;full_length_coverage=1;non_full_length_coverage=2;isoform_length=2634;expected_accuracy=0.998   | gnl BL_ORD_ID 19155      cb8564_c90208/f1p2/2920<br>isoform=cb8564_c90208;full_length_coverage=1;non_full_length_coverage=2;isoform_length=2920;expected_accuracy=0.990 | 396 | 2634 | 56   | 399  | 490  | 276<br>3 | 24   | 385      |   |
| cb8564_c120048/f1p1/2648                                                                                                                         | gnl BL_ORD_ID 52227      cb8564_c115027/f1p0/3027                                                                                                                       | 2   | 2408 | 2407 | 2577 | 213  | 261<br>9 | 2769 | 293<br>9 |   |
| cb13187_c8/f1p0/1776                                                                                                                             | gnl BL_ORD_ID 58889      cb9788_c16/f1p0/3980                                                                                                                           | 1   | 1273 | 1272 | 1775 | 50   | 132<br>2 | 3000 | 348<br>5 |   |
| cb3219_c1/f1p1/3698<br>isoform=cb3219_c1;full_length_coverage=1;non_full_length_coverage=1;isoform_length=3698;expected_accuracy=0.997           | gnl BL_ORD_ID 40398      cb3219_c2/f1p0/3884<br>isoform=cb3219_c2;full_length_coverage=1;non_full_length_coverage=0;isoform_length=3884;expected_accuracy=0.996         | 318 | 3698 | 1    | 319  | 510  | 388<br>4 | 31   | 345      |   |
| cb12662_c8/f1p0/1447                                                                                                                             | gnl BL_ORD_ID 1517      cb10696_c0/f4p2/1611<br>isoform=cb10696_c0;full_length_coverage=4;non_full_length_coverage=2;isoform_length=1611;expected_accuracy=0.997        | 179 | 1453 | 56   | 179  | 264  | 153<br>8 | 1    | 132      |   |
| cb6278_c18/f1p0/1671<br>isoform=cb6278_c18;full_length_coverage=1;non_full_length_coverage=0;isoform_length=1671;expected_accuracy=0.994         | gnl BL_ORD_ID 49582      cb6278_c9/f1p0/2648                                                                                                                            | 144 | 1671 | 1    | 144  | 1053 | 258<br>0 | 75   | 218      |   |
| cb8564_c146072/f3p3/2176<br>isoform=cb8564_c146072;full_length_coverage=3;non_full_length_coverage=3;isoform_length=2176;expected_accuracy=1.000 | gnl BL_ORD_ID 18820      cb8564_c8764/f7p3/3755<br>isoform=cb8564_c8764;full_length_coverage=7;non_full_length_coverage=3;isoform_length=3755;expected_accuracy=1.000   | 213 | 2162 | 1    | 215  | 1805 | 375<br>2 | 13   | 236      |   |
| cb14044_c6/f1p0/1650                                                                                                                             | gnl BL_ORD_ID 6045      cb6181_c37/f1p1/2073                                                                                                                            | 1   | 1019 | 1015 | 1650 | 206  | 123      | 1369 | 200      |   |

|                                                                                                                                                |                                                                                                                                                                         |     |      |      |      |      |      |      |      |
|------------------------------------------------------------------------------------------------------------------------------------------------|-------------------------------------------------------------------------------------------------------------------------------------------------------------------------|-----|------|------|------|------|------|------|------|
| isoform=cb14044_c6;full_length_coverage=1;non_full_length_coverage=0;isoform_length=1650;expected_accuracy=0.996<br>cb8564_c36056/f1p0/2652    | isoform=cb6181_c37;full_length_coverage=1;non_full_length_coverage=1;isoform_length=2073;expected_accuracy=0.996<br>gnl BL_ORD_ID 17164      cb8564_c90856/f1p11/2858   |     |      |      |      |      | 5    |      | 4    |
| isoform=cb8564_c36056;full_length_coverage=1;non_full_length_coverage=0;isoform_length=2652;expected_accuracy=0.999<br>cb1992_c10/f2p2/3165    | isoform=cb8564_c90856;full_length_coverage=1;non_full_length_coverage=11;isoform_length=2858;expected_accuracy=0.999<br>gnl BL_ORD_ID 34846      cb1992_c24/f1p0/3683   | 248 | 2649 | 1    | 251  | 457  | 2858 | 86   | 313  |
| isoform=cb1992_c10;full_length_coverage=2;non_full_length_coverage=2;isoform_length=3165;expected_accuracy=0.997<br>cb373_c8/f1p0/3698         | isoform=cb1992_c24;full_length_coverage=1;non_full_length_coverage=0;isoform_length=3683;expected_accuracy=0.996<br>gnl BL_ORD_ID 41213      cb373_c11/f1p0/3937        | 119 | 2407 | 2405 | 3165 | 2    | 2288 | 2911 | 3671 |
| isoform=cb373_c8;full_length_coverage=1;non_full_length_coverage=0;isoform_length=3698;expected_accuracy=0.997<br>cb18456_c1419/f5p0/1798      | isoform=cb373_c11;full_length_coverage=1;non_full_length_coverage=0;isoform_length=3937;expected_accuracy=0.996<br>gnl BL_ORD_ID 15336      cb8564_c41228/f1p1/4062     | 1   | 3333 | 3334 | 3698 | 62   | 3395 | 3501 | 3865 |
| isoform=cb18456_c1419;full_length_coverage=5;non_full_length_coverage=0;isoform_length=1798;expected_accuracy=1.000<br>cb8564_c41162/f1p0/3158 | isoform=cb8564_c41228;full_length_coverage=1;non_full_length_coverage=1;isoform_length=4062;expected_accuracy=0.997<br>gnl BL_ORD_ID 14411      cb8564_c44258/f1p0/3202 | 245 | 1791 | 3    | 249  | 2516 | 4062 | 1    | 246  |
| cb8564_c41162/f1p0/3158                                                                                                                        | isoform=cb8564_c44258;full_length_coverage=1;non_full_length_coverage=0;isoform_length=3202;expected_accuracy=0.993<br>gnl BL_ORD_ID 14411      cb8564_c44258/f1p0/3202 | 21  | 2553 | 2548 | 3030 | 15   | 2589 | 2720 | 3202 |
| cb8129_c11/f1p0/1889                                                                                                                           | isoform=cb8129_c11;full_length_coverage=1;non_full_length_coverage=0;isoform_length=1889;expected_accuracy=0.993<br>gnl BL_ORD_ID 50878      cb8129_c9/f1p0/3008        | 1   | 1104 | 1105 | 1889 | 2    | 1099 | 2092 | 2876 |

|                                                                                                                      |                                                                                                                      |                          |      |      |      |      |      |      |      |      |  |
|----------------------------------------------------------------------------------------------------------------------|----------------------------------------------------------------------------------------------------------------------|--------------------------|------|------|------|------|------|------|------|------|--|
| racy=0.994                                                                                                           |                                                                                                                      |                          |      |      |      |      |      |      |      |      |  |
| cb14630_c37/f1p1/5449                                                                                                | gnl BL_ORD_ID 28779                                                                                                  | cb14630_c32/f1p2/5767    |      |      |      |      |      |      |      |      |  |
| isoform=cb14630_c37;full_length_coverage=1;non_full_length_coverage=1;isoform_length=5449;expected_accuracy=0.996    | isoform=cb14630_c32;full_length_coverage=1;non_full_length_coverage=2;isoform_length=5767;expected_accuracy=0.994    |                          | 1    | 4273 | 4268 | 5449 | 5    | 4295 | 4468 | 5648 |  |
| cb873_c19/f1p0/2582                                                                                                  |                                                                                                                      |                          |      |      |      |      |      |      |      |      |  |
| isoform=cb873_c19;full_length_coverage=1;non_full_length_coverage=0;isoform_length=2582;expected_accuracy=0.994      | gnl BL_ORD_ID 57590                                                                                                  | cb873_c16/f1p0/4474      | 1124 | 2582 | 1    | 1124 | 2949 | 4412 | 17   | 1140 |  |
| cb6519_c2/f1p0/2447                                                                                                  | gnl BL_ORD_ID 49795                                                                                                  | cb6519_c0/f1p0/2728      | 346  | 2398 | 57   | 348  | 423  | 2504 | 20   | 309  |  |
| cb12189_c34/f1p3/1569                                                                                                | gnl BL_ORD_ID 60618                                                                                                  | cb12189_c37/f1p0/1873    | 559  | 1499 | 6    | 563  | 788  | 1728 | 1    | 556  |  |
| cb8564_c5007/f1p0/1941                                                                                               | gnl BL_ORD_ID 12987                                                                                                  | cb8564_c162306/f3p5/3760 |      |      |      |      |      |      |      |      |  |
| isoform=cb8564_c162306;full_length_coverage=3;non_full_length_coverage=5;isoform_length=3760;expected_accuracy=0.998 | isoform=cb8564_c162306;full_length_coverage=3;non_full_length_coverage=5;isoform_length=3760;expected_accuracy=0.998 |                          | 1    | 1447 | 1446 | 1756 | 1872 | 3318 | 3450 | 3760 |  |
| cb8564_c107323/f4p0/3768                                                                                             | gnl BL_ORD_ID 15999                                                                                                  | cb8564_c50865/f1p1/3822  |      |      |      |      |      |      |      |      |  |
| isoform=cb8564_c107323;full_length_coverage=4;non_full_length_coverage=0;isoform_length=3768;expected_accuracy=0.999 | isoform=cb8564_c50865;full_length_coverage=1;non_full_length_coverage=1;isoform_length=3822;expected_accuracy=0.994  |                          | 18   | 2808 | 2807 | 3719 | 1    | 2798 | 2909 | 3821 |  |
| cb1333_c9/f4p0/1480                                                                                                  | gnl BL_ORD_ID 27473                                                                                                  | cb1333_c63/f1p0/4699     |      |      |      |      |      |      |      |      |  |
| isoform=cb1333_c9;full_length_coverage=4;non_full_length_coverage=0;isoform_length=1480;expected_accuracy=1.000      | isoform=cb1333_c63;full_length_coverage=1;non_full_length_coverage=0;isoform_length=4699;expected_accuracy=0.998     |                          | 152  | 1473 | 29   | 154  | 3375 | 4693 | 19   | 144  |  |
| cb5565_c14/f2p1/3093                                                                                                 | gnl BL_ORD_ID 46508                                                                                                  | cb5565_c81/f1p2/3263     | 253  | 3093 | 2    | 252  | 373  | 321  | 5    | 257  |  |

|                                                                                                                                                |                                                                                                                                                                          |     |      |      |      |      |          |      |          |  |
|------------------------------------------------------------------------------------------------------------------------------------------------|--------------------------------------------------------------------------------------------------------------------------------------------------------------------------|-----|------|------|------|------|----------|------|----------|--|
| isoform=cb5565_c14;full_length_coverage=2;non_full_length_coverage=1;isoform_length=3093;expected_accuracy=1.000<br>cb8564_c77411/f1p0/2169    | isoform=cb5565_c81;full_length_coverage=1;non_full_length_coverage=2;isoform_length=3263;expected_accuracy=1.000                                                         |     |      |      |      |      |          | 2    |          |  |
| isoform=cb8564_c77411;full_length_coverage=1;non_full_length_coverage=0;isoform_length=2169;expected_accuracy=0.993<br>cb8564_c78147/f1p0/3581 | gnl BL_ORD_ID 57969 cb8564_c85458/f1p0/2732                                                                                                                              | 105 | 2165 | 1    | 106  | 613  | 268<br>1 | 151  | 256      |  |
| cb18456_c7148/f1p0/1595                                                                                                                        | gnl BL_ORD_ID 56063 cb8564_c53906/f1p0/3730                                                                                                                              | 20  | 2647 | 2650 | 3149 | 29   | 265<br>2 | 2841 | 334<br>1 |  |
| isoform=cb18456_c7148;full_length_coverage=1;non_full_length_coverage=0;isoform_length=1595;expected_accuracy=0.993<br>cb4100_c4/f1p0/2480     | gnl BL_ORD_ID 9949      cb8564_c118109/f1p0/2145<br>isoform=cb8564_c118109;full_length_coverage=1;non_full_length_coverage=0;isoform_length=2145;expected_accuracy=1.000 | 330 | 1595 | 8    | 334  | 900  | 214<br>3 | 43   | 371      |  |
| isoform=cb4100_c4;full_length_coverage=1;non_full_length_coverage=0;isoform_length=2480;expected_accuracy=0.996<br>cb1279_c10/f2p0/2859        | gnl BL_ORD_ID 71787 cb4100_c1/f1p0/3420                                                                                                                                  | 1   | 1792 | 1792 | 2480 | 21   | 181<br>2 | 2661 | 334<br>9 |  |
| isoform=cb1279_c10;full_length_coverage=2;non_full_length_coverage=0;isoform_length=2859;expected_accuracy=0.999<br>cb5139_c7/f1p1/2751        | gnl BL_ORD_ID 61185 cb1279_c50/f1p1/3873                                                                                                                                 | 202 | 2859 | 1    | 203  | 1144 | 379<br>8 | 4    | 206      |  |
| cb8564_c42814/f1p0/2151                                                                                                                        | gnl BL_ORD_ID 73323 cb5139_c9/f1p0/3187                                                                                                                                  | 1   | 1384 | 1382 | 2749 | 59   | 144<br>2 | 1650 | 302<br>9 |  |
| isoform=cb8564_c42814;full_length_coverage=1;non_full_length_coverage=0;isoform_length=2151;expected_                                          | gnl BL_ORD_ID 14368      cb8564_c34638/f1p0/2817<br>isoform=cb8564_c34638;full_length_coverage=1;non_full_length_coverage=0;isoform_length=2817;expected_ac              | 650 | 2151 | 7    | 652  | 1330 | 281<br>5 | 1    | 647      |  |



|                                                                                                                                                            |                                                          |     |      |      |      |     |      |      |      |
|------------------------------------------------------------------------------------------------------------------------------------------------------------|----------------------------------------------------------|-----|------|------|------|-----|------|------|------|
| accuracy=0.993<br>cb4997_c15/f1p0/2104<br>isoform=cb4997_c15;full_length_coverage=1;non_full_length_coverage=0;isoform_length=2104;expected_accuracy=0.994 | curacy=0.992<br>gnl BL_ORD_ID 73169 cb4997_c12/f1p1/2947 | 1   | 1547 | 1545 | 2103 | 16  | 1559 | 2281 | 2838 |
| cb6622_c9/f1p0/2543<br>isoform=cb6622_c7;full_length_coverage=1;non_full_length_coverage=0;isoform_length=2787;expected_accuracy=0.997                     | gnl BL_ORD_ID 3917 cb6622_c7/f1p0/2787                   | 143 | 2245 | 13   | 139  | 687 | 2787 | 1    | 127  |
| cb2935_c37/f1p0/2974<br>isoform=cb2935_c37;full_length_coverage=1;non_full_length_coverage=0;isoform_length=2974;expected_accuracy=0.995                   | gnl BL_ORD_ID 70092 cb2935_c30/f1p0/3442                 | 1   | 1742 | 1737 | 2970 | 126 | 1876 | 2077 | 3311 |
| cb8564_c81944/f1p1/3166<br>isoform=cb8564_c81944;full_length_coverage=1;non_full_length_coverage=1;isoform_length=3166;expected_accuracy=0.995             | gnl BL_ORD_ID 16500 cb8564_c52758/f1p0/3322              | 1   | 2661 | 2660 | 3166 | 12  | 2664 | 2815 | 3322 |
| cb6391_c2/f2p0/2236<br>isoform=cb6391_c2;full_length_coverage=2;non_full_length_coverage=0;isoform_length=2236;expected_accuracy=0.998                     | gnl BL_ORD_ID 4281 cb6391_c4/f1p0/2869                   | 101 | 1695 | 1693 | 2234 | 1   | 1614 | 2328 | 2869 |
| cb6633_c19/f1p0/1733<br>isoform=cb6633_c9;full_length_coverage=1;non_full_length_coverage=0;isoform_length=1733;expected_accuracy=1.000                    | gnl BL_ORD_ID 3747 cb6633_c9/f1p0/2805                   | 1   | 1137 | 1134 | 1676 | 382 | 1518 | 2261 | 2805 |
| cb8564_c122040/f1p0/2864                                                                                                                                   | gnl BL_ORD_ID 54091 cb8564_c18227/f1p0/4224              | 1   | 1886 | 1886 | 2767 | 2   | 188  | 2179 | 306  |

|                                                                                                                                                |                                                                                                                                                              |      |      |      |      |      |     |      |     |
|------------------------------------------------------------------------------------------------------------------------------------------------|--------------------------------------------------------------------------------------------------------------------------------------------------------------|------|------|------|------|------|-----|------|-----|
| isoform=cb8564_c122040;full_length_coverage=1;non_full_length_coverage=0;isoform_length=2864;expected_accuracy=1.000                           |                                                                                                                                                              |      |      |      |      |      |     | 7    | 0   |
| cb8564_c13291/f1p0/2701                                                                                                                        | gnl BL_ORD_ID 54022 cb8564_c17079/f1p0/3440                                                                                                                  | 1003 | 2637 | 1    | 1004 | 1801 | 343 | 1    | 100 |
|                                                                                                                                                |                                                                                                                                                              |      |      |      |      |      | 5   |      | 4   |
| cb2965_c3/f1p0/3423                                                                                                                            | gnl BL_ORD_ID 70107 cb2965_c4/f1p0/3375                                                                                                                      | 1    | 2735 | 2733 | 3313 | 1    | 273 | 2845 | 341 |
|                                                                                                                                                |                                                                                                                                                              |      |      |      |      |      | 5   |      | 4   |
| cb2737_c37/f1p0/2894                                                                                                                           | gnl BL_ORD_ID 38134 cb2737_c22/f1p0/3196<br>isoform=cb2737_c22;full_length_coverage=1;non_full_length_coverage=0;isoform_length=3196;expected_accuracy=0.995 | 1    | 1495 | 1493 | 2819 | 282  | 176 | 1894 | 319 |
|                                                                                                                                                |                                                                                                                                                              |      |      |      |      |      | 3   |      | 6   |
| cb8564_c49562/f1p0/2838<br>isoform=cb8564_c49562;full_length_coverage=1;non_full_length_coverage=0;isoform_length=2838;expected_accuracy=0.995 | gnl BL_ORD_ID 55334 cb8564_c38684/f1p1/3241                                                                                                                  | 1    | 2331 | 2327 | 2834 | 1    | 232 | 2736 | 324 |
|                                                                                                                                                |                                                                                                                                                              |      |      |      |      |      | 8   |      | 7   |
| cb8264_c4/f1p0/1748<br>isoform=cb8264_c4;full_length_coverage=1;non_full_length_coverage=0;isoform_length=1748;expected_accuracy=0.999         | gnl BL_ORD_ID 51864 cb8264_c2/f1p0/2001                                                                                                                      | 205  | 1748 | 28   | 205  | 309  | 185 | 5    | 182 |
|                                                                                                                                                |                                                                                                                                                              |      |      |      |      |      | 3   |      |     |
| cb6490_c7/f1p0/2432                                                                                                                            | gnl BL_ORD_ID 49764 cb6490_c1/f1p0/2838                                                                                                                      | 1    | 1463 | 1462 | 2380 | 8    | 146 | 1840 | 276 |
|                                                                                                                                                |                                                                                                                                                              |      |      |      |      |      | 3   |      | 9   |
| cb14724_c6/f1p0/1741                                                                                                                           | gnl BL_ORD_ID 40277 cb3622_c10/f1p0/3532<br>isoform=cb3622_c10;full_length_coverage=1;non_full_length_coverage=0;isoform_length=3532;expected_accuracy=0.999 | 1    | 1354 | 1352 | 1729 | 1    | 135 | 1847 | 222 |
|                                                                                                                                                |                                                                                                                                                              |      |      |      |      |      | 2   |      | 3   |
| cb3226_c7/f1p0/3210                                                                                                                            | gnl BL_ORD_ID 39532 cb3226_c6/f1p0/3708                                                                                                                      | 1    | 2322 | 2320 | 3136 | 100  | 242 | 2893 | 370 |

|                                                                                                                     |                                                                                                                     |     |      |      |      |     |     |      |     |   |
|---------------------------------------------------------------------------------------------------------------------|---------------------------------------------------------------------------------------------------------------------|-----|------|------|------|-----|-----|------|-----|---|
| isoform=cb3226_c7;full_length_coverage=1;non_full_length_coverage=0;isoform_length=3210;expected_accuracy=0.998     | isoform=cb3226_c6;full_length_coverage=1;non_full_length_coverage=0;isoform_length=3708;expected_accuracy=0.999     |     |      |      |      |     |     | 0    |     | 8 |
| cb8564_c38035/f1p0/2770                                                                                             | gnl BL_ORD_ID 55839 cb8564_c43677/f1p0/3269                                                                         | 1   | 2035 | 2033 | 2752 | 55  | 209 | 2281 | 299 | 9 |
| cb8564_c49562/f1p0/2838                                                                                             |                                                                                                                     |     |      |      |      |     |     |      |     |   |
| isoform=cb8564_c49562;full_length_coverage=1;non_full_length_coverage=0;isoform_length=2838;expected_accuracy=0.995 | gnl BL_ORD_ID 55430 cb8564_c41551/f1p0/3408                                                                         | 13  | 2331 | 2327 | 2838 | 12  | 233 | 2438 | 294 | 9 |
|                                                                                                                     | gnl BL_ORD_ID 46524 cb6063_c4/f2p0/2706                                                                             |     |      |      |      |     |     |      |     |   |
| cb6063_c13/f1p1/2429                                                                                                | isoform=cb6063_c4;full_length_coverage=2;non_full_length_coverage=0;isoform_length=2706;expected_accuracy=0.999     | 119 | 2436 | 1    | 122  | 376 | 268 | 120  | 241 | 7 |
| cb8564_c81839/f1p0/2332                                                                                             | gnl BL_ORD_ID 18354 cb8564_c88127/f1p0/2488                                                                         |     |      |      |      |     |     |      |     |   |
| isoform=cb8564_c81839;full_length_coverage=1;non_full_length_coverage=0;isoform_length=2332;expected_accuracy=0.998 | isoform=cb8564_c88127;full_length_coverage=1;non_full_length_coverage=0;isoform_length=2488;expected_accuracy=0.996 | 1   | 1946 | 1947 | 2332 | 3   | 194 | 2077 | 245 | 7 |
| cb8564_c2326/f1p0/2006                                                                                              | gnl BL_ORD_ID 14743 cb8564_c2392/f1p2/2510                                                                          |     |      |      |      |     |     |      |     |   |
| isoform=cb8564_c2326;full_length_coverage=1;non_full_length_coverage=0;isoform_length=2006;expected_accuracy=0.990  | isoform=cb8564_c2392;full_length_coverage=1;non_full_length_coverage=2;isoform_length=2510;expected_accuracy=0.992  | 230 | 2002 | 4    | 234  | 728 | 251 | 4    | 246 | 0 |
| cb2737_c14/f1p0/2854                                                                                                | gnl BL_ORD_ID 38132 cb2737_c20/f1p0/3644                                                                            |     |      |      |      |     |     |      |     |   |
| isoform=cb2737_c14;full_length_coverage=1;non_full_length_coverage=0;isoform_length=2854;expected_accuracy=0.996    | isoform=cb2737_c20;full_length_coverage=1;non_full_length_coverage=0;isoform_length=3644;expected_accuracy=0.998    | 110 | 2854 | 1    | 110  | 871 | 359 | 24   | 133 | 4 |
| cb8564_c68745/f3p0/2856                                                                                             | gnl BL_ORD_ID 15454 cb8564_c67827/f7p0/3512                                                                         | 292 | 2856 | 3    | 297  | 948 | 351 | 1    | 295 |   |

|                                                                                                                     |                                                                                                                                                                                           |      |      |      |      |      |     |      |     |   |
|---------------------------------------------------------------------------------------------------------------------|-------------------------------------------------------------------------------------------------------------------------------------------------------------------------------------------|------|------|------|------|------|-----|------|-----|---|
| isoform=cb8564_c68745;full_length_coverage=3;non_full_length_coverage=0;isoform_length=2856;expected_accuracy=0.996 | isoform=cb8564_c67827;full_length_coverage=7;non_full_length_coverage=0;isoform_length=3512;expected_accuracy=1.000                                                                       |      |      |      |      |      |     |      |     | 2 |
| cb124_c43/f1p0/2759                                                                                                 | gnl BL_ORD_ID 22798                      cb124_c13/f1p0/3616<br>isoform=cb124_c13;full_length_coverage=1;non_full_length_coverage=0;isoform_length=3616;expected_accuracy=0.999           | 232  | 2448 | 16   | 233  | 1400 | 361 | 11   | 228 | 6 |
| cb2461_c12/f1p0/5311                                                                                                | gnl BL_ORD_ID 37876                      cb2461_c6/f1p0/5655<br>isoform=cb2461_c6;full_length_coverage=1;non_full_length_coverage=0;isoform_length=5655;expected_accuracy=0.998           | 41   | 4642 | 4637 | 4910 | 12   | 460 | 4924 | 519 | 6 |
| cb8564_c14775/f1p1/2535                                                                                             | gnl BL_ORD_ID 12253                      cb8564_c145424/f8p2/3323<br>isoform=cb8564_c145424;full_length_coverage=8;non_full_length_coverage=2;isoform_length=3323;expected_accuracy=0.998 | 1056 | 2492 | 1    | 1058 | 1795 | 323 | 287  | 134 | 1 |
| cb5603_c0/f4p1/2663                                                                                                 | gnl BL_ORD_ID 45848                      cb5603_c1/f1p1/3057<br>isoform=cb5603_c0;full_length_coverage=4;non_full_length_coverage=1;isoform_length=2663;expected_accuracy=1.000           | 148  | 2650 | 1    | 149  | 540  | 304 | 85   | 232 | 5 |
| cb3941_c69/f1p0/3448                                                                                                | gnl BL_ORD_ID 39437                      cb3941_c64/f1p2/4241<br>isoform=cb3941_c64;full_length_coverage=1;non_full_length_coverage=2;isoform_length=4241;expected_accuracy=0.995         | 27   | 2961 | 2958 | 3212 | 1    | 293 | 3933 | 418 | 4 |
| cb12714_c29/f1p2/1583                                                                                               | gnl BL_ORD_ID 53995                      cb8564_c16613/f1p1/4260                                                                                                                          | 1    | 1295 | 1293 | 1588 | 1    | 129 | 3915 | 421 | 5 |
| cb762_c8/f1p0/3946                                                                                                  | gnl BL_ORD_ID 8132                      cb762_c4/f1p0/4517                                                                                                                                | 1    | 2768 | 2766 | 3921 | 111  | 289 | 3356 | 451 |   |



|                                                                                                                      |                                                                                                                     |      |      |      |      |      |      |      |      |  |  |
|----------------------------------------------------------------------------------------------------------------------|---------------------------------------------------------------------------------------------------------------------|------|------|------|------|------|------|------|------|--|--|
| racy=1.000                                                                                                           | cy=0.999                                                                                                            |      |      |      |      |      |      |      |      |  |  |
| cb1360_c13/f1p1/7793                                                                                                 | gnl BL_ORD_ID 61281 cb1360_c12/f1p1/7905                                                                            | 1    | 4804 | 4803 | 7369 | 69   | 487  | 5231 | 779  |  |  |
|                                                                                                                      |                                                                                                                     |      |      |      |      |      | 2    |      | 1    |  |  |
| cb452_c36/f1p0/2902                                                                                                  | gnl BL_ORD_ID 43284 cb452_c15/f2p3/3234                                                                             |      |      |      |      |      |      |      |      |  |  |
| isoform=cb452_c36;full_length_coverage=1;non_full_length_coverage=0;isoform_length=2902;expected_accuracy=0.994      | isoform=cb452_c15;full_length_coverage=2;non_full_length_coverage=3;isoform_length=3234;expected_accuracy=0.999     | 1374 | 2902 | 1    | 1374 | 1633 | 315  | 132  | 149  |  |  |
|                                                                                                                      |                                                                                                                     |      |      |      |      |      | 3    |      | 5    |  |  |
| cb2927_c17/f1p0/2828                                                                                                 | gnl BL_ORD_ID 37697 cb2927_c6/f1p1/3514                                                                             |      |      |      |      |      |      |      |      |  |  |
| isoform=cb2927_c17;full_length_coverage=1;non_full_length_coverage=0;isoform_length=2828;expected_accuracy=0.995     | isoform=cb2927_c6;full_length_coverage=1;non_full_length_coverage=1;isoform_length=3514;expected_accuracy=0.996     | 1    | 1680 | 1676 | 2827 | 17   | 1711 | 2359 | 350  |  |  |
|                                                                                                                      |                                                                                                                     |      |      |      |      |      |      |      | 6    |  |  |
| cb322_c25/f1p0/3845                                                                                                  | gnl BL_ORD_ID 70802 cb322_c34/f1p0/3998                                                                             | 22   | 2733 | 2731 | 3661 | 1    | 271  | 3056 | 398  |  |  |
|                                                                                                                      |                                                                                                                     |      |      |      |      |      | 8    |      | 6    |  |  |
| cb8564_c43450/f1p0/2695                                                                                              | gnl BL_ORD_ID 55191 cb8564_c35155/f1p0/2975                                                                         | 10   | 1886 | 1882 | 2705 | 9    | 189  | 2010 | 283  |  |  |
|                                                                                                                      |                                                                                                                     |      |      |      |      |      | 5    |      | 4    |  |  |
| cb8564_c180116/f1p0/2944                                                                                             | gnl BL_ORD_ID 55910 cb8564_c48645/f1p1/3287                                                                         | 15   | 2522 | 2520 | 2883 | 17   | 252  | 2750 | 3113 |  |  |
| isoform=cb8564_c180116;full_length_coverage=1;non_full_length_coverage=0;isoform_length=2944;expected_accuracy=0.996 |                                                                                                                     |      |      |      |      |      | 1    |      |      |  |  |
| cb8564_c66920/f3p3/2894                                                                                              | gnl BL_ORD_ID 14531 cb8564_c41778/f1p9/3482                                                                         | 243  | 2863 | 1    | 247  | 812  | 343  | 1    | 247  |  |  |
|                                                                                                                      | isoform=cb8564_c41778;full_length_coverage=1;non_full_length_coverage=9;isoform_length=3482;expected_accuracy=0.992 |      |      |      |      |      | 2    |      |      |  |  |
| cb8564_c40810/f1p0/3998                                                                                              | gnl BL_ORD_ID 16628 cb8564_c47737/f7p5/4351                                                                         | 1    | 2765 | 2761 | 3998 | 72   | 283  | 3038 | 427  |  |  |
| isoform=cb8564_c40810;full_length_coverage=1;non_full_length_coverage=0;isoform_length=3998;expected_                | isoform=cb8564_c47737;full_length_coverage=7;non_full_length_coverage=5;isoform_length=4351;expected_ac             |      |      |      |      |      | 5    |      | 4    |  |  |

|                                                                                                                                                          |                                                                                                                                                                    |      |      |      |      |      |          |      |          |
|----------------------------------------------------------------------------------------------------------------------------------------------------------|--------------------------------------------------------------------------------------------------------------------------------------------------------------------|------|------|------|------|------|----------|------|----------|
| accuracy=0.996<br>cb3297_c5/f2p0/2376<br>isoform=cb3297_c5;full_length_coverage=2;non_full_length_coverage=0;isoform_length=2376;expected_accuracy=1.000 | curacy=0.998<br>gnl BL_ORD_ID 71052 cb3297_c9/f1p0/2560                                                                                                            | 1    | 1692 | 1692 | 2317 | 46   | 174<br>1 | 1951 | 257<br>7 |
| cb6058_c4/f1p0/2346<br>isoform=cb6058_c4;full_length_coverage=1;non_full_length_coverage=0;isoform_length=2346;expected_accuracy=0.994                   | gnl BL_ORD_ID 74840 cb6058_c8/f1p0/2922                                                                                                                            | 1    | 1761 | 1757 | 2343 | 393  | 215<br>4 | 2282 | 286<br>9 |
| cb8564_c41076/f2p1/3193                                                                                                                                  | gnl BL_ORD_ID 55376 cb8564_c39821/f1p0/3886                                                                                                                        | 1316 | 3124 | 1    | 1317 | 1943 | 373<br>5 | 1    | 131<br>7 |
| cb3756_c5/f1p0/3416                                                                                                                                      | gnl BL_ORD_ID 39637 cb3756_c10/f1p3/3741<br>isoform=cb3756_c10;full_length_coverage=1;non_full_length_coverage=3;isoform_length=3741;expected_accuracy=0.997       | 886  | 3432 | 98   | 888  | 1058 | 360<br>5 | 29   | 810      |
| cb8564_c52387/f1p5/2863<br>isoform=cb8564_c52387;full_length_coverage=1;non_full_length_coverage=5;isoform_length=2863;expected_accuracy=0.992           | gnl BL_ORD_ID 56633 cb8564_c49796/f2p5/3077                                                                                                                        | 586  | 2863 | 8    | 582  | 740  | 301<br>2 | 5    | 555      |
| cb18456_c2426/f1p0/1054<br>isoform=cb18456_c2426;full_length_coverage=1;non_full_length_coverage=0;isoform_length=1054;expected_accuracy=0.993           | gnl BL_ORD_ID 36016 cb18456_c2454/f1p0/1244<br>isoform=cb18456_c2454;full_length_coverage=1;non_full_length_coverage=0;isoform_length=1244;expected_accuracy=0.991 | 498  | 1054 | 6    | 500  | 627  | 1185     | 9    | 515      |
| cb273_c4/f1p0/1772<br>isoform=cb273_c4;full_length_coverage=1;non_full_length_coverage=0;isoform_length=1772;expected_accuracy=0.994                     | gnl BL_ORD_ID 68134 cb273_c6/f1p0/5146                                                                                                                             | 1    | 1084 | 1084 | 1745 | 3099 | 418<br>2 | 4322 | 498<br>4 |

|                                                                                                                      |                                                                                                                      |                          |     |      |      |      |      |      |      |      |
|----------------------------------------------------------------------------------------------------------------------|----------------------------------------------------------------------------------------------------------------------|--------------------------|-----|------|------|------|------|------|------|------|
| y=0.999                                                                                                              |                                                                                                                      |                          |     |      |      |      |      |      |      |      |
| cb8564_c37361/f1p0/3076                                                                                              | gnl BL_ORD_ID 55623                                                                                                  | cb8564_c47027/f1p0/3544  | 1   | 2481 | 2477 | 3070 | 1    | 2506 | 2607 | 3200 |
| cb7270_c18/f1p0/1814                                                                                                 | gnl BL_ORD_ID 7000                                                                                                   | cb7270_c8/f1p0/2657      |     |      |      |      |      |      |      |      |
| isoform=cb7270_c18;full_length_coverage=1;non_full_length_coverage=0;isoform_length=1814;expected_accuracy=0.995     | isoform=cb7270_c8;full_length_coverage=1;non_full_length_coverage=0;isoform_length=2657;expected_accuracy=0.992      |                          | 358 | 1814 | 7    | 358  | 1185 | 2637 | 1    | 348  |
| cb8564_c50881/f1p2/2125                                                                                              | gnl BL_ORD_ID 13455                                                                                                  | cb8564_c182847/f1p0/2435 |     |      |      |      |      |      |      |      |
| isoform=cb8564_c50881;full_length_coverage=1;non_full_length_coverage=2;isoform_length=2125;expected_accuracy=0.994  | isoform=cb8564_c182847;full_length_coverage=1;non_full_length_coverage=0;isoform_length=2435;expected_accuracy=1.000 |                          | 1   | 1863 | 1858 | 2107 | 42   | 1906 | 2183 | 2435 |
| cb8564_c20664/f3p4/3119                                                                                              | gnl BL_ORD_ID 13766                                                                                                  | cb8564_c18520/f2p0/3299  |     |      |      |      |      |      |      |      |
| isoform=cb8564_c20664;full_length_coverage=3;non_full_length_coverage=4;isoform_length=3119;expected_accuracy=0.996  | isoform=cb8564_c18520;full_length_coverage=2;non_full_length_coverage=0;isoform_length=3299;expected_accuracy=0.992  |                          | 10  | 2032 | 2032 | 3119 | 73   | 2089 | 2198 | 3284 |
| cb8564_c157909/f1p2/2084                                                                                             | gnl BL_ORD_ID 13480                                                                                                  | cb8564_c19794/f1p0/2446  |     |      |      |      |      |      |      |      |
| isoform=cb8564_c157909;full_length_coverage=1;non_full_length_coverage=2;isoform_length=2084;expected_accuracy=0.999 | isoform=cb8564_c19794;full_length_coverage=1;non_full_length_coverage=0;isoform_length=2446;expected_accuracy=0.994  |                          | 1   | 1503 | 1504 | 2084 | 10   | 1502 | 1864 | 2445 |
| cb11067_c4/f1p1/1290                                                                                                 | gnl BL_ORD_ID 49137                                                                                                  | cb11067_c11/f1p0/1488    |     |      |      |      |      |      |      |      |
|                                                                                                                      |                                                                                                                      |                          | 324 | 1288 | 9    | 328  | 502  | 1443 | 1    | 312  |
| cb8564_c37361/f1p0/3076                                                                                              | gnl BL_ORD_ID 55551                                                                                                  | cb8564_c44964/f1p0/3508  |     |      |      |      |      |      |      |      |
|                                                                                                                      |                                                                                                                      |                          | 1   | 2481 | 2477 | 3070 | 1    | 2478 | 2579 | 3173 |
| cb5617_c9/f1p0/2638                                                                                                  | gnl BL_ORD_ID 45940                                                                                                  | cb5617_c3/f2p0/2746      |     |      |      |      |      |      |      |      |
| isoform=cb5617_c9;full_length_coverage=1;non_full_length_coverage=0;isoform_length=2638;expected_accuracy=0.999      | isoform=cb5617_c3;full_length_coverage=2;non_full_length_coverage=0;isoform_length=2746;expected_accuracy=0.999      |                          | 1   | 1904 | 1905 | 2638 | 1    | 1895 | 2014 | 2746 |



|                                                                                                                                                                |                                                                                                                                                                                     |      |      |      |      |      |      |      |      |
|----------------------------------------------------------------------------------------------------------------------------------------------------------------|-------------------------------------------------------------------------------------------------------------------------------------------------------------------------------------|------|------|------|------|------|------|------|------|
| acy=0.997<br>cb8564_c20620/f1p1/2688<br>isoform=cb8564_c20620;full_length_coverage=1;non_full_length_coverage=1;isoform_length=2688;expected_accuracy=0.992    | cy=0.998<br>gnl BL_ORD_ID 13176      cb8564_c15957/f1p0/2838<br>isoform=cb8564_c15957;full_length_coverage=1;non_full_length_coverage=0;isoform_length=2838;expected_accuracy=0.994 | 1    | 1695 | 1694 | 2635 | 2    | 1684 | 1792 | 2721 |
| cb2097_c120/f1p0/1809<br>isoform=cb2097_c120;full_length_coverage=1;non_full_length_coverage=0;isoform_length=1809;expected_accuracy=0.994                     | gnl BL_ORD_ID 35231      cb2097_c18/f10p0/2448<br>isoform=cb2097_c18;full_length_coverage=10;non_full_length_coverage=0;isoform_length=2448;expected_accuracy=1.000                 | 1    | 1422 | 1420 | 1809 | 515  | 1945 | 2055 | 2446 |
| cb4178_c0/f2p0/2616<br>isoform=cb4178_c0;full_length_coverage=2;non_full_length_coverage=0;isoform_length=2616;expected_accuracy=1.000                         | gnl BL_ORD_ID 43092      cb4178_c2/f1p0/2741<br>isoform=cb4178_c2;full_length_coverage=1;non_full_length_coverage=0;isoform_length=2741;expected_accuracy=0.994                     | 1272 | 2616 | 1    | 1271 | 1390 | 2734 | 1    | 1268 |
| cb18837_c1/f1p0/5324<br>isoform=cb18837_c1;full_length_coverage=1;non_full_length_coverage=0;isoform_length=5324;expected_accuracy=0.998                       | gnl BL_ORD_ID 36411      cb18837_c0/f1p0/5358<br>isoform=cb18837_c0;full_length_coverage=1;non_full_length_coverage=0;isoform_length=5358;expected_accuracy=0.998                   | 1    | 3292 | 3290 | 5192 | 9    | 3307 | 3456 | 5358 |
| cb6802_c57/f1p0/2631<br>cb5624_c2/f1p0/2635<br>isoform=cb5624_c2;full_length_coverage=1;non_full_length_coverage=0;isoform_length=2635;expected_accuracy=0.996 | gnl BL_ORD_ID 50089      cb6802_c59/f1p0/2826<br>gnl BL_ORD_ID 74174      cb5624_c5/f1p0/2752                                                                                       | 191  | 2236 | 1    | 192  | 332  | 2377 | 40   | 207  |
| cb17004_c0/f1p0/1612                                                                                                                                           | gnl BL_ORD_ID 25706      cb1366_c4/f1p0/1599<br>isoform=cb1366_c4;full_length_coverage=1;non_full_length_coverage=0;isoform_length=1599;expected_accuracy=0.998                     | 1    | 1015 | 1015 | 1482 | 5    | 1017 | 1133 | 1599 |

|                                                                                                                                            |                                                                                                                                                                    |     |      |      |      |     |      |      |      |  |  |
|--------------------------------------------------------------------------------------------------------------------------------------------|--------------------------------------------------------------------------------------------------------------------------------------------------------------------|-----|------|------|------|-----|------|------|------|--|--|
|                                                                                                                                            | cy=0.995                                                                                                                                                           |     |      |      |      |     |      |      |      |  |  |
| cb1956_c12/f1p0/3120                                                                                                                       | gnl BL_ORD_ID 66540 cb1956_c20/f1p0/3189                                                                                                                           | 106 | 2709 | 2714 | 3133 | 1   | 2607 | 2744 | 3163 |  |  |
| cb2873_c10/f1p0/3294                                                                                                                       | gnl BL_ORD_ID 38306 cb2873_c3/f1p0/3789<br>isoform=cb2873_c3;full_length_coverage=1;non_full_length_coverage=0;isoform_length=3789;expected_accuracy=0.995         | 320 | 3125 | 50   | 321  | 989 | 3789 | 1    | 268  |  |  |
| cb7226_c3/f1p0/2414                                                                                                                        | gnl BL_ORD_ID 6814 cb7226_c0/f1p0/2663<br>isoform=cb7226_c0;full_length_coverage=1;non_full_length_coverage=0;isoform_length=2663;expected_accuracy=0.996          | 10  | 1607 | 1605 | 2401 | 42  | 1635 | 1869 | 2661 |  |  |
| cb8564_c111706/f1p0/2253                                                                                                                   | gnl BL_ORD_ID 52405 cb8564_c121956/f1p0/2565                                                                                                                       | 1   | 1681 | 1678 | 2175 | 2   | 1682 | 1973 | 2470 |  |  |
| cb9360_c14/f18p2/2034<br>isoform=cb9360_c14;full_length_coverage=18;non_full_length_coverage=2;isoform_length=2034;expected_accuracy=1.000 | gnl BL_ORD_ID 59676 cb9360_c8/f1p1/2215                                                                                                                            | 1   | 1126 | 1123 | 2034 | 1   | 1126 | 1279 | 2190 |  |  |
| cb11915_c7/f1p2/1523<br>isoform=cb11915_c7;full_length_coverage=1;non_full_length_coverage=2;isoform_length=1523;expected_accuracy=0.992   | gnl BL_ORD_ID 18218 cb8564_c89018/f4p5/1975<br>isoform=cb8564_c89018;full_length_coverage=4;non_full_length_coverage=5;isoform_length=1975;expected_accuracy=0.999 | 1   | 1133 | 1128 | 1523 | 1   | 1136 | 1491 | 1887 |  |  |
| cb8084_c3/f1p1/2128                                                                                                                        | gnl BL_ORD_ID 9019 cb8084_c2/f3p1/2279<br>isoform=cb8084_c2;full_length_coverage=3;non_full_length_coverage=1;isoform_length=2279;expected_accuracy=0.996          | 1   | 1853 | 1853 | 2100 | 1   | 1853 | 2009 | 2257 |  |  |
| cb8564_c12805/f1p0/2580                                                                                                                    | gnl BL_ORD_ID 54405 cb8564_c35890/f1p0/3157                                                                                                                        | 1   | 1695 | 1690 | 2580 | 1   | 169  | 1937 | 283  |  |  |

|                                                                                                                     |                                                                                                                     |                          |     |      |      |      |      |     |      |     |
|---------------------------------------------------------------------------------------------------------------------|---------------------------------------------------------------------------------------------------------------------|--------------------------|-----|------|------|------|------|-----|------|-----|
| isoform=cb8564_c12805;full_length_coverage=1;non_full_length_coverage=0;isoform_length=2580;expected_accuracy=0.993 |                                                                                                                     |                          |     |      |      |      |      | 5   | 0    |     |
| cb8564_c127273/f1p0/3035                                                                                            | gnl BL_ORD_ID 54548                                                                                                 | cb8564_c125967/f1p0/4340 | 1   | 1629 | 1629 | 2760 | 1204 | 282 | 3205 | 433 |
|                                                                                                                     |                                                                                                                     |                          |     |      |      |      |      | 2   |      | 2   |
| cb12714_c29/f1p2/1583                                                                                               | gnl BL_ORD_ID 52654                                                                                                 | cb8564_c10111/f1p0/2706  | 1   | 1296 | 1293 | 1597 | 1    | 129 | 2335 | 263 |
|                                                                                                                     |                                                                                                                     |                          |     |      |      |      |      | 6   |      | 9   |
| cb16680_c6/f1p0/1706                                                                                                | gnl BL_ORD_ID 17788                                                                                                 | cb8564_c83905/f9p1/2112  |     |      |      |      |      |     |      |     |
| isoform=cb16680_c6;full_length_coverage=1;non_full_length_coverage=0;isoform_length=1706;expected_accuracy=0.997    | isoform=cb8564_c83905;full_length_coverage=9;non_full_length_coverage=1;isoform_length=2112;expected_accuracy=0.997 |                          | 150 | 1706 | 1    | 154  | 526  | 206 | 42   | 193 |
|                                                                                                                     |                                                                                                                     |                          |     |      |      |      |      | 9   |      |     |
| cb8564_c37866/f1p3/2874                                                                                             | gnl BL_ORD_ID 16172                                                                                                 | cb8564_c53024/f1p0/3159  |     |      |      |      |      |     |      |     |
| isoform=cb8564_c37866;full_length_coverage=1;non_full_length_coverage=3;isoform_length=2874;expected_accuracy=0.990 | isoform=cb8564_c53024;full_length_coverage=1;non_full_length_coverage=0;isoform_length=3159;expected_accuracy=0.996 |                          | 1   | 1719 | 1716 | 2869 | 1    | 169 | 2017 | 315 |
|                                                                                                                     |                                                                                                                     |                          |     |      |      |      |      | 9   |      | 9   |
| cb3759_c13/f1p0/1723                                                                                                | gnl BL_ORD_ID 40823                                                                                                 | cb3759_c16/f1p0/3176     |     |      |      |      |      |     |      |     |
| isoform=cb3759_c13;full_length_coverage=1;non_full_length_coverage=0;isoform_length=1723;expected_accuracy=0.994    | isoform=cb3759_c16;full_length_coverage=1;non_full_length_coverage=0;isoform_length=3176;expected_accuracy=0.997    |                          | 372 | 1686 | 4    | 373  | 1869 | 317 | 20   | 389 |
|                                                                                                                     |                                                                                                                     |                          |     |      |      |      |      | 6   |      |     |
| cb8564_c36343/f1p0/3448                                                                                             | gnl BL_ORD_ID 55939                                                                                                 | cb8564_c49630/f1p4/3487  | 20  | 2930 | 2930 | 3180 | 13   | 291 | 3243 | 349 |
|                                                                                                                     |                                                                                                                     |                          |     |      |      |      |      | 3   |      | 3   |
| cb18012_c2/f1p0/1829                                                                                                | gnl BL_ORD_ID 15055                                                                                                 | cb8564_c3236/f1p0/1961   |     |      |      |      |      |     |      |     |
|                                                                                                                     | isoform=cb8564_c3236;full_length_coverage=1;non_full_length_coverage=0;isoform_length=1961;expected_accuracy=1.000  |                          | 175 | 1755 | 8    | 176  | 377  | 195 | 40   | 208 |
|                                                                                                                     |                                                                                                                     |                          |     |      |      |      |      | 9   |      |     |
| cb5469_c10/f1p0/2248                                                                                                | gnl BL_ORD_ID 73955                                                                                                 | cb5469_c13/f1p0/2524     | 225 | 2222 | 70   | 225  | 381  | 238 | 47   | 203 |

|                                                                                                                       |                                                                                                                     |                         |      |      |      |      |      |     |      |      |   |   |
|-----------------------------------------------------------------------------------------------------------------------|---------------------------------------------------------------------------------------------------------------------|-------------------------|------|------|------|------|------|-----|------|------|---|---|
| isoform=cb5469_c10;full_length_coverage=1;non_full_length_coverage=0;isoform_length=2248;expected_accuracy=0.999      |                                                                                                                     |                         |      |      |      |      |      |     |      | 4    |   |   |
| cb8564_c132795/f5p10/3729                                                                                             | gnl BL_ORD_ID 16742                                                                                                 | cb8564_c628/f3p1/4943   |      |      |      |      |      |     |      |      |   |   |
| isoform=cb8564_c132795;full_length_coverage=5;non_full_length_coverage=10;isoform_length=3729;expected_accuracy=0.999 | isoform=cb8564_c628;full_length_coverage=3;non_full_length_coverage=1;isoform_length=4943;expected_accuracy=1.000   |                         | 1    | 1832 | 1830 | 3640 | 87   | 191 | 3085 | 489  | 6 | 2 |
| cb3856_c0/f2p1/1619                                                                                                   | gnl BL_ORD_ID 40756                                                                                                 | cb3856_c4/f1p1/1955     |      |      |      |      |      |     |      |      |   |   |
| isoform=cb3856_c0;full_length_coverage=2;non_full_length_coverage=1;isoform_length=1619;expected_accuracy=0.996       | isoform=cb3856_c4;full_length_coverage=1;non_full_length_coverage=1;isoform_length=1955;expected_accuracy=0.997     |                         | 129  | 1619 | 1    | 131  | 365  | 185 | 1    | 131  | 5 |   |
| cb237_c14/f1p0/4353                                                                                                   | gnl BL_ORD_ID 38950                                                                                                 | cb237_c12/f1p0/4420     |      |      |      |      |      |     |      |      |   |   |
|                                                                                                                       | isoform=cb237_c12;full_length_coverage=1;non_full_length_coverage=0;isoform_length=4420;expected_accuracy=0.995     |                         | 192  | 4179 | 1    | 191  | 455  | 442 | 97   | 285  | 0 |   |
| cb8564_c15608/f1p3/3110                                                                                               | gnl BL_ORD_ID 13013                                                                                                 | cb8564_c17114/f4p0/3443 |      |      |      |      |      |     |      |      |   |   |
|                                                                                                                       | isoform=cb8564_c17114;full_length_coverage=4;non_full_length_coverage=0;isoform_length=3443;expected_accuracy=1.000 |                         | 1    | 2790 | 2785 | 3102 | 1    | 279 | 2934 | 325  | 0 | 1 |
| cb8564_c24867/f1p3/2846                                                                                               | gnl BL_ORD_ID 56353                                                                                                 | cb8564_c75114/f1p0/2866 |      |      |      |      |      |     |      |      |   |   |
|                                                                                                                       |                                                                                                                     |                         | 10   | 2038 | 2038 | 2584 | 9    | 203 | 2193 | 273  | 5 | 7 |
| cb6169_c4/f1p0/1708                                                                                                   | gnl BL_ORD_ID 46016                                                                                                 | cb6169_c1/f1p0/2784     |      |      |      |      |      |     |      |      |   |   |
| isoform=cb6169_c4;full_length_coverage=1;non_full_length_coverage=0;isoform_length=1708;expected_accuracy=0.994       | isoform=cb6169_c1;full_length_coverage=1;non_full_length_coverage=0;isoform_length=2784;expected_accuracy=0.995     |                         | 1    | 1352 | 1350 | 1707 | 1    | 135 | 2428 | 278  | 1 | 4 |
| cb8564_c2788/f1p0/2682                                                                                                | gnl BL_ORD_ID 54800                                                                                                 | cb8564_c2742/f1p0/3521  |      |      |      |      |      |     |      |      |   |   |
|                                                                                                                       |                                                                                                                     |                         | 1155 | 2667 | 1    | 1157 | 1637 | 314 | 1    | 1158 |   |   |

|                                                                                                                     |                                                                                                                      |                          |      |      |      |      |      |      |      |      |
|---------------------------------------------------------------------------------------------------------------------|----------------------------------------------------------------------------------------------------------------------|--------------------------|------|------|------|------|------|------|------|------|
| isoform=cb8564_c2788;full_length_coverage=1;non_full_length_coverage=0;isoform_length=2682;expected_accuracy=0.999  |                                                                                                                      |                          |      |      |      |      |      |      |      | 5    |
| cb12931_c15/f1p0/1493                                                                                               | gnl BL_ORD_ID 15602                                                                                                  | cb8564_c50271/f1p1/2688  |      |      |      |      |      |      |      |      |
| isoform=cb12931_c15;full_length_coverage=1;non_full_length_coverage=0;isoform_length=1493;expected_accuracy=1.000   | isoform=cb8564_c50271;full_length_coverage=1;non_full_length_coverage=1;isoform_length=2688;expected_accuracy=0.994  |                          | 1    | 1106 | 1104 | 1488 | 1    | 1104 | 2302 | 2688 |
| cb8564_c17694/f1p1/3299                                                                                             | gnl BL_ORD_ID 32013                                                                                                  | cb16355_c15/f1p8/5101    |      |      |      |      |      |      |      |      |
|                                                                                                                     | isoform=cb16355_c15;full_length_coverage=1;non_full_length_coverage=8;isoform_length=5101;expected_accuracy=1.000    |                          | 1    | 2347 | 2347 | 3356 | 1489 | 3837 | 4065 | 5075 |
| cb2242_c3/f2p1/1866                                                                                                 | gnl BL_ORD_ID 37986                                                                                                  | cb2242_c10/f1p1/2221     |      |      |      |      |      |      |      |      |
| isoform=cb2242_c3;full_length_coverage=2;non_full_length_coverage=1;isoform_length=1866;expected_accuracy=1.000     | isoform=cb2242_c10;full_length_coverage=1;non_full_length_coverage=1;isoform_length=2221;expected_accuracy=1.000     |                          | 352  | 1823 | 9    | 352  | 751  | 2221 | 1    | 346  |
| cb9290_c0/f2p0/2007                                                                                                 | gnl BL_ORD_ID 59626                                                                                                  | cb9290_c2/f1p0/2119      |      |      |      |      |      |      |      |      |
| isoform=cb9290_c0;full_length_coverage=2;non_full_length_coverage=0;isoform_length=2007;expected_accuracy=0.996     |                                                                                                                      |                          | 527  | 1989 | 76   | 527  | 604  | 2066 | 2    | 454  |
| cb8564_c36689/f1p1/2368                                                                                             | gnl BL_ORD_ID 11085                                                                                                  | cb8564_c115872/f1p0/2750 |      |      |      |      |      |      |      |      |
| isoform=cb8564_c36689;full_length_coverage=1;non_full_length_coverage=1;isoform_length=2368;expected_accuracy=0.991 | isoform=cb8564_c115872;full_length_coverage=1;non_full_length_coverage=0;isoform_length=2750;expected_accuracy=0.995 |                          | 1    | 1709 | 1706 | 2368 | 1    | 1705 | 2089 | 2750 |
| cb3898_c0/f8p1/2602                                                                                                 | gnl BL_ORD_ID 39329                                                                                                  | cb3898_c5/f1p0/2807      |      |      |      |      |      |      |      |      |
| isoform=cb3898_c0;full_length_coverage=8;non_full_length_coverage=1;isoform_length=2602;expected_accuracy=1.000     | isoform=cb3898_c5;full_length_coverage=1;non_full_length_coverage=0;isoform_length=2807;expected_accuracy=1.000      |                          | 1288 | 2582 | 1    | 1289 | 1513 | 2807 | 47   | 1333 |

|                                                                                                                                                     |                                                                                                                                                                                         |     |      |      |      |      |      |      |      |
|-----------------------------------------------------------------------------------------------------------------------------------------------------|-----------------------------------------------------------------------------------------------------------------------------------------------------------------------------------------|-----|------|------|------|------|------|------|------|
| acy=1.000<br>cb4651_c0/f2p2/1332<br>isoform=cb4651_c0;full_length_coverage=2;non_full_length_coverage=2;isoform_length=1332;expected_accuracy=0.998 | cy=0.999<br>gnl BL_ORD_ID 72812 cb4651_c3/f1p0/4374                                                                                                                                     | 290 | 1332 | 9    | 291  | 1576 | 2618 | 1    | 283  |
| cb3120_c19/f1p3/2883<br>isoform=cb3120_c19;full_length_coverage=1;non_full_length_coverage=3;isoform_length=2883;expected_accuracy=0.998            | gnl BL_ORD_ID 37028                      cb3120_c15/f1p2/2916<br>isoform=cb3120_c15;full_length_coverage=1;non_full_length_coverage=2;isoform_length=2916;expected_accuracy=0.994       | 1   | 1982 | 1981 | 2837 | 4    | 1962 | 2064 | 2912 |
| cb2263_c2/f3p1/2293<br>isoform=cb2263_c2;full_length_coverage=3;non_full_length_coverage=1;isoform_length=2293;expected_accuracy=0.996              | gnl BL_ORD_ID 68389 cb2263_c20/f1p0/2614                                                                                                                                                | 452 | 2205 | 7    | 455  | 840  | 2593 | 1    | 450  |
| cb18456_c6478/f1p2/1469<br>isoform=cb18456_c6478;full_length_coverage=1;non_full_length_coverage=2;isoform_length=1469;expected_accuracy=0.992      | gnl BL_ORD_ID 53487 cb8564_c126194/f1p0/2132                                                                                                                                            | 289 | 1469 | 4    | 289  | 666  | 1840 | 1    | 288  |
| cb8564_c45596/f1p1/3430<br>isoform=cb8564_c181853;full_length_coverage=1;non_full_length_coverage=0;isoform_length=2119;expected_accuracy=0.997     | gnl BL_ORD_ID 14990                      cb8564_c35477/f1p1/3605<br>isoform=cb8564_c35477;full_length_coverage=1;non_full_length_coverage=1;isoform_length=3605;expected_accuracy=0.997 | 2   | 2780 | 2775 | 3379 | 21   | 2829 | 2948 | 3552 |
| cb8564_c181853/f1p0/2119<br>isoform=cb8564_c181853;full_length_coverage=1;non_full_length_coverage=0;isoform_length=2119;expected_accuracy=0.997    | gnl BL_ORD_ID 55341 cb8564_c38927/f1p0/3326                                                                                                                                             | 1   | 1339 | 1334 | 2119 | 7    | 1346 | 2174 | 2963 |
| cb8564_c1895/f1p0/2189                                                                                                                              | gnl BL_ORD_ID 53781 cb8564_c1882/f1p2/3030                                                                                                                                              | 265 | 1974 | 5    | 262  | 1193 | 290  | 9    | 269  |

|                                                                                                                     |                                                                                                                     |                         |      |      |      |      |      |      |      |     |
|---------------------------------------------------------------------------------------------------------------------|---------------------------------------------------------------------------------------------------------------------|-------------------------|------|------|------|------|------|------|------|-----|
| cb2737_c64/f1p1/2838                                                                                                | gnl BL_ORD_ID 36571                                                                                                 | cb2737_c54/f1p0/3029    |      |      |      |      |      | 3    |      |     |
| isoform=cb2737_c64;full_length_coverage=1;non_full_length_coverage=1;isoform_length=2838;expected_accuracy=0.993    | isoform=cb2737_c54;full_length_coverage=1;non_full_length_coverage=0;isoform_length=3029;expected_accuracy=0.995    |                         | 1    | 1915 | 1914 | 2838 | 104  | 199  | 2110 | 302 |
| cb1535_c1/f2p0/3305                                                                                                 | gnl BL_ORD_ID 63719                                                                                                 | cb1535_c3/f1p0/4275     |      |      |      |      |      |      |      |     |
| isoform=cb1535_c1;full_length_coverage=2;non_full_length_coverage=0;isoform_length=3305;expected_accuracy=1.000     |                                                                                                                     |                         | 1245 | 3305 | 1    | 1246 | 2162 | 422  | 1    | 124 |
|                                                                                                                     | gnl BL_ORD_ID 15431                                                                                                 | cb8564_c43034/f1p2/3197 |      |      |      |      |      |      |      |     |
| cb8564_c71222/f1p0/3190                                                                                             | isoform=cb8564_c43034;full_length_coverage=1;non_full_length_coverage=2;isoform_length=3197;expected_accuracy=0.996 |                         | 1    | 2497 | 2494 | 3028 | 4    | 252  | 2663 | 319 |
|                                                                                                                     | gnl BL_ORD_ID 19083                                                                                                 | cb8564_c80095/f1p2/3116 |      |      |      |      |      |      |      |     |
| cb8564_c71904/f1p1/2820                                                                                             | isoform=cb8564_c80095;full_length_coverage=1;non_full_length_coverage=2;isoform_length=3116;expected_accuracy=0.995 |                         | 1    | 1983 | 1978 | 2820 | 75   | 206  | 2249 | 309 |
| isoform=cb8564_c71904;full_length_coverage=1;non_full_length_coverage=1;isoform_length=2820;expected_accuracy=0.996 |                                                                                                                     |                         |      |      |      |      |      |      |      |     |
| cb8564_c43450/f1p0/2695                                                                                             | gnl BL_ORD_ID 55962                                                                                                 | cb8564_c50282/f1p0/4402 |      |      |      |      |      |      |      |     |
|                                                                                                                     |                                                                                                                     |                         | 16   | 1886 | 1882 | 2714 | 1457 | 335  | 3472 | 430 |
| cb8564_c69933/f1p0/3523                                                                                             | gnl BL_ORD_ID 16114                                                                                                 | cb8564_c66873/f7p2/3961 |      |      |      |      |      |      |      |     |
| isoform=cb8564_c69933;full_length_coverage=1;non_full_length_coverage=0;isoform_length=3523;expected_accuracy=0.994 | isoform=cb8564_c66873;full_length_coverage=7;non_full_length_coverage=2;isoform_length=3961;expected_accuracy=1.000 |                         | 167  | 3523 | 1    | 169  | 544  | 390  | 30   | 195 |
| cb8564_c4910/f1p0/2450                                                                                              | gnl BL_ORD_ID 55705                                                                                                 | cb8564_c4909/f1p0/3122  |      |      |      |      |      |      |      |     |
| isoform=cb8564_c4910;full_length_coverage=1;non_full_length_coverage=0;isoform_length=2450;expected_ac              |                                                                                                                     |                         | 164  | 2448 | 15   | 165  | 802  | 3118 | 1    | 151 |

|                          |                                                                                                                                                                          |     |      |      |      |     |      |      |      |  |
|--------------------------|--------------------------------------------------------------------------------------------------------------------------------------------------------------------------|-----|------|------|------|-----|------|------|------|--|
| curacy=0.999             |                                                                                                                                                                          |     |      |      |      |     |      |      |      |  |
| cb8564_c48235/f1p1/2252  | gnl BL_ORD_ID 14278      cb8564_c36280/f1p0/3133<br>isoform=cb8564_c36280;full_length_coverage=1;non_full_length_coverage=0;isoform_length=3133;expected_accuracy=1.000  | 1   | 1600 | 1596 | 2253 | 124 | 1723 | 2476 | 3132 |  |
| cb8564_c185920/f1p0/2777 | gnl BL_ORD_ID 56403      cb8564_c76007/f1p0/2966<br>isoform=cb8564_c185920;full_length_coverage=1;non_full_length_coverage=0;isoform_length=2777;expected_accuracy=0.996 | 174 | 2774 | 1    | 177  | 354 | 2946 | 23   | 195  |  |
| cb8564_c77080/f1p0/2613  | gnl BL_ORD_ID 12826      cb8564_c168354/f1p1/2790<br>isoform=cb8564_c77080;full_length_coverage=1;non_full_length_coverage=0;isoform_length=2613;expected_accuracy=0.995 | 2   | 2048 | 2043 | 2527 | 86  | 2127 | 2308 | 2790 |  |
| cb4240_c5/f1p0/2230      | gnl BL_ORD_ID 72395      cb4240_c3/f1p0/3396<br>isoform=cb4240_c5;full_length_coverage=1;non_full_length_coverage=0;isoform_length=2230;expected_accuracy=0.994          | 1   | 1667 | 1666 | 2163 | 1   | 1667 | 2905 | 3401 |  |
| cb10255_c19/f2p2/1507    | gnl BL_ORD_ID 1898      cb10255_c13/f1p2/1646<br>isoform=cb10255_c19;full_length_coverage=2;non_full_length_coverage=2;isoform_length=1507;expected_accuracy=0.997       | 110 | 1507 | 1    | 113  | 249 | 1646 | 9    | 121  |  |
| cb14724_c5/f1p0/1750     | gnl BL_ORD_ID 40725      cb3622_c2/f3p1/2136<br>isoform=cb14724_c5;full_length_coverage=1;non_full_length_coverage=0;isoform_length=1750;expected_accuracy=0.994         | 1   | 1331 | 1329 | 1699 | 25  | 1356 | 1765 | 2136 |  |
| cb8564_c47011/f1p0/3100  | gnl BL_ORD_ID 15193      cb8564_c42308/f1p5/3192<br>isoform=cb8564_c47011;full_length_coverage=1;non_full_length_coverage=5;isoform_length=3100;expected_accuracy=0.999  | 2   | 2306 | 2301 | 2933 | 4   | 2316 | 2554 | 3187 |  |



|                          |                                                                                                                                                                                                   |     |      |      |      |      |          |      |          |
|--------------------------|---------------------------------------------------------------------------------------------------------------------------------------------------------------------------------------------------|-----|------|------|------|------|----------|------|----------|
| cb11989_c4/f1p1/1835     | curacy=0.995<br>gnl BL_ORD_ID 32340                      cb1767_c37/f1p0/1947<br>isoform=cb1767_c37;full_length_coverage=1;non_full_length_coverage=0;isoform_length=1947;expected_accuracy=0.995 | 1   | 1494 | 1495 | 1797 | 1946 | 444      | 327  | 27       |
| cb16226_c1/f1p0/1638     | gnl BL_ORD_ID 55251   cb8564_c36501/f1p0/2829                                                                                                                                                     | 466 | 1595 | 6    | 469  | 1597 | 272<br>6 | 35   | 496      |
| cb8564_c182028/f1p0/2513 | gnl BL_ORD_ID 11428                      cb8564_c149144/f2p18/3112<br>isoform=cb8564_c182028;full_length_coverage=1;non_full_length_coverage=0;isoform_length=2513;expected_accuracy=0.996        | 1   | 1971 | 1968 | 2513 | 1    | 197<br>4 | 2118 | 266<br>6 |
| cb13042_c4/f1p0/1356     | gnl BL_ORD_ID 25514                      cb13042_c1/f1p0/1422<br>isoform=cb13042_c1;full_length_coverage=1;non_full_length_coverage=0;isoform_length=1422;expected_accuracy=1.000                 | 321 | 1300 | 5    | 322  | 181  | 1166     | 1    | 327      |
| cb8564_c36731/f1p2/2761  | gnl BL_ORD_ID 55522   cb8564_c44123/f1p1/3230                                                                                                                                                     | 15  | 1977 | 1972 | 2738 | 15   | 197<br>6 | 2405 | 317<br>1 |
| cb11067_c13/f1p0/1371    | gnl BL_ORD_ID 2318                      cb11067_c7/f1p0/1522<br>isoform=cb11067_c13;full_length_coverage=1;non_full_length_coverage=0;isoform_length=1371;expected_accuracy=0.993                 | 1   | 1177 | 1176 | 1371 | 1    | 1177     | 1286 | 148<br>1 |
| cb8564_c15031/f1p2/3179  | gnl BL_ORD_ID 54178   cb8564_c19910/f1p0/4399<br>isoform=cb8564_c15031;full_length_coverage=1;non_full_length_coverage=2;isoform_length=3179;expected_accuracy=0.995                              | 2   | 2486 | 2487 | 3179 | 33   | 251<br>6 | 3153 | 384<br>2 |
| cb313_c30/f3p0/3087      | gnl BL_ORD_ID 38275                      cb313_c7/f1p0/4354                                                                                                                                       | 1   | 1940 | 1938 | 3062 | 11   | 194      | 3217 | 435      |

|                                                                                                                      |                                                                                                                   |     |      |      |      |     |     |      |     |   |
|----------------------------------------------------------------------------------------------------------------------|-------------------------------------------------------------------------------------------------------------------|-----|------|------|------|-----|-----|------|-----|---|
| isoform=cb313_c30;full_length_coverage=3;non_full_length_coverage=0;isoform_length=3087;expected_accuracy=1.000      | isoform=cb313_c7;full_length_coverage=1;non_full_length_coverage=0;isoform_length=4354;expected_accuracy=0.994    |     |      |      |      |     |     | 5    | 2   |   |
| cb8564_c115594/f1p0/2839                                                                                             | gnl BL_ORD_ID 57979 cb8564_c85837/f1p0/3079                                                                       | 17  | 1722 | 1720 | 2501 | 16  | 175 | 2306 | 308 | 8 |
| cb6631_c25/f1p0/1946                                                                                                 | gnl BL_ORD_ID 5050 cb6631_c10/f1p0/2272                                                                           |     |      |      |      |     |     |      |     |   |
| isoform=cb6631_c25;full_length_coverage=1;non_full_length_coverage=0;isoform_length=1946;expected_accuracy=0.996     | isoform=cb6631_c10;full_length_coverage=1;non_full_length_coverage=0;isoform_length=2272;expected_accuracy=0.991  | 1   | 1189 | 1186 | 1946 | 17  | 120 | 1355 | 212 | 6 |
| cb8564_c80434/f1p3/2690                                                                                              | gnl BL_ORD_ID 56852 cb8564_c74048/f1p2/2835                                                                       | 1   | 1480 | 1480 | 2592 | 43  | 152 | 1725 | 284 | 2 |
| isoform=cb8564_c80434;full_length_coverage=1;non_full_length_coverage=3;isoform_length=2690;expected_accuracy=0.991  |                                                                                                                   |     |      |      |      |     |     |      |     |   |
| cb8564_c185920/f1p0/2777                                                                                             | gnl BL_ORD_ID 55607 cb8564_c46612/f1p1/3367                                                                       | 174 | 2777 | 1    | 177  | 357 | 296 | 22   | 199 |   |
| isoform=cb8564_c185920;full_length_coverage=1;non_full_length_coverage=0;isoform_length=2777;expected_accuracy=0.996 |                                                                                                                   |     |      |      |      |     |     |      |     |   |
| cb8564_c146306/f4p4/2710                                                                                             | gnl BL_ORD_ID 54560 cb8564_c126417/f1p0/2804                                                                      | 1   | 1702 | 1700 | 2666 | 25  | 172 | 1830 | 279 | 5 |
| isoform=cb8564_c146306;full_length_coverage=4;non_full_length_coverage=4;isoform_length=2710;expected_accuracy=1.000 |                                                                                                                   |     |      |      |      |     |     |      |     |   |
| cb7560_c35/f1p1/2004                                                                                                 | gnl BL_ORD_ID 7066 cb7560_c70/f94p4/2550                                                                          |     |      |      |      |     |     |      |     |   |
| isoform=cb7560_c35;full_length_coverage=1;non_full_length_coverage=1;isoform_length=2004;expected_accuracy=0.994     | isoform=cb7560_c70;full_length_coverage=94;non_full_length_coverage=4;isoform_length=2550;expected_accuracy=1.000 | 1   | 1446 | 1444 | 2004 | 285 | 173 | 1979 | 253 | 9 |
| cb8564_c119623/f1p0/1981                                                                                             | gnl BL_ORD_ID 12072 cb8564_c140600/f2p3/2228                                                                      | 1   | 1282 | 1281 | 1981 | 12  | 128 | 1438 | 213 |   |

|                                                                                                                                                  |                                                                                                                                                                          |      |      |      |      |      |      |      |      |
|--------------------------------------------------------------------------------------------------------------------------------------------------|--------------------------------------------------------------------------------------------------------------------------------------------------------------------------|------|------|------|------|------|------|------|------|
| isoform=cb8564_c119623;full_length_coverage=1;non_full_length_coverage=0;isoform_length=1981;expected_accuracy=0.997                             | isoform=cb8564_c140600;full_length_coverage=2;non_full_length_coverage=3;isoform_length=2228;expected_accuracy=0.993                                                     |      |      |      |      |      | 7    |      | 9    |
| cb18456_c1776/f1p0/1211                                                                                                                          | gnl BL_ORD_ID 9159      cb8564_c120244/f1p7/1979<br>isoform=cb8564_c120244;full_length_coverage=1;non_full_length_coverage=7;isoform_length=1979;expected_accuracy=0.993 | 280  | 1207 | 9    | 285  | 1052 | 1979 | 667  | 940  |
| cb8564_c156696/f1p2/3606                                                                                                                         | gnl BL_ORD_ID 15360      cb8564_c32914/f9p2/4297<br>isoform=cb8564_c32914;full_length_coverage=9;non_full_length_coverage=2;isoform_length=4297;expected_accuracy=1.000  | 1756 | 3589 | 1    | 1757 | 2464 | 4297 | 46   | 1802 |
| cb3294_c3/f1p0/5376                                                                                                                              | gnl BL_ORD_ID 71049      cb3294_c2/f1p0/6277                                                                                                                             | 210  | 3886 | 3884 | 5369 | 281  | 3957 | 4601 | 6086 |
| cb8564_c146250/f5p1/2250<br>isoform=cb8564_c146250;full_length_coverage=5;non_full_length_coverage=1;isoform_length=2250;expected_accuracy=1.000 | gnl BL_ORD_ID 52655      cb8564_c10124/f1p0/3457                                                                                                                         | 1    | 1476 | 1474 | 2211 | 41   | 1519 | 2675 | 3413 |
| cb8564_c178335/f1p2/3430<br>isoform=cb8564_c178335;full_length_coverage=1;non_full_length_coverage=2;isoform_length=3430;expected_accuracy=0.998 | gnl BL_ORD_ID 54608      cb8564_c127899/f1p0/3880                                                                                                                        | 1    | 2863 | 2861 | 3379 | 213  | 3075 | 3305 | 3823 |
| cb3609_c1/f2p0/2920<br>isoform=cb3609_c1;full_length_coverage=2;non_full_length_coverage=0;isoform_length=2920;expected_accuracy=0.994           | gnl BL_ORD_ID 41221      cb3609_c4/f1p0/3102<br>isoform=cb3609_c4;full_length_coverage=1;non_full_length_coverage=0;isoform_length=3102;expected_accuracy=0.997          | 1    | 1465 | 1463 | 2880 | 112  | 1576 | 1687 | 3102 |
| cb8564_c89448/f1p0/2859                                                                                                                          | gnl BL_ORD_ID 56345      cb8564_c74914/f1p0/3530                                                                                                                         | 1276 | 2859 | 1    | 1281 | 1497 | 310  | 2    | 128  |

|                                                                                                                      |                                                                                                                     |                         |     |      |      |      |      |      |      |      |
|----------------------------------------------------------------------------------------------------------------------|---------------------------------------------------------------------------------------------------------------------|-------------------------|-----|------|------|------|------|------|------|------|
| isoform=cb8564_c89448;full_length_coverage=1;non_full_length_coverage=0;isoform_length=2859;expected_accuracy=0.995  |                                                                                                                     |                         |     |      |      |      |      | 5    | 4    |      |
| cb16742_c1/f2p1/1240                                                                                                 | gnl BL_ORD_ID 33184                                                                                                 | cb16742_c2/f1p2/1416    |     |      |      |      |      |      |      |      |
| isoform=cb16742_c1;full_length_coverage=2;non_full_length_coverage=1;isoform_length=1240;expected_accuracy=0.999     | isoform=cb16742_c2;full_length_coverage=1;non_full_length_coverage=2;isoform_length=1416;expected_accuracy=1.000    |                         | 104 | 1239 | 1    | 106  | 282  | 1416 | 34   | 140  |
| cb10272_c17/f1p1/1759                                                                                                | gnl BL_ORD_ID 48324                                                                                                 | cb10272_c11/f1p0/2538   | 11  | 1157 | 1157 | 1632 | 2    | 1148 | 2015 | 2490 |
| cb17104_c1/f1p0/1292                                                                                                 | gnl BL_ORD_ID 33287                                                                                                 | cb17104_c5/f1p0/1481    |     |      |      |      |      |      |      |      |
| isoform=cb17104_c1;full_length_coverage=2;non_full_length_coverage=0;isoform_length=1292;expected_accuracy=0.993     | isoform=cb17104_c5;full_length_coverage=1;non_full_length_coverage=0;isoform_length=1481;expected_accuracy=0.993    |                         | 232 | 1296 | 25   | 234  | 416  | 1480 | 1    | 208  |
| cb11421_c0/f2p0/1024                                                                                                 | gnl BL_ORD_ID 60199                                                                                                 | cb11421_c1/f1p0/3136    |     |      |      |      |      |      |      |      |
| isoform=cb11421_c0;full_length_coverage=2;non_full_length_coverage=0;isoform_length=1024;expected_accuracy=1.000     | isoform=cb11421_c1;full_length_coverage=1;non_full_length_coverage=0;isoform_length=3136;expected_accuracy=1.000    |                         | 293 | 1024 | 37   | 295  | 1856 | 2585 | 10   | 267  |
| cb2737_c40/f1p0/2830                                                                                                 | gnl BL_ORD_ID 38132                                                                                                 | cb2737_c20/f1p0/3644    |     |      |      |      |      |      |      |      |
| isoform=cb2737_c40;full_length_coverage=1;non_full_length_coverage=0;isoform_length=2830;expected_accuracy=0.998     | isoform=cb2737_c20;full_length_coverage=1;non_full_length_coverage=0;isoform_length=3644;expected_accuracy=0.998    |                         | 1   | 1397 | 1395 | 2650 | 881  | 2278 | 2410 | 3644 |
| cb8564_c146886/f4p5/3319                                                                                             | gnl BL_ORD_ID 54440                                                                                                 | cb8564_c46842/f1p0/3416 |     |      |      |      |      |      |      |      |
| isoform=cb8564_c146886;full_length_coverage=4;non_full_length_coverage=5;isoform_length=3319;expected_accuracy=0.996 | isoform=cb8564_c46842;full_length_coverage=1;non_full_length_coverage=0;isoform_length=3416;expected_accuracy=0.996 |                         | 1   | 1993 | 1991 | 3288 | 1    | 2028 | 2138 | 3435 |
| cb1178_c29/f1p0/1155                                                                                                 | gnl BL_ORD_ID 61143                                                                                                 | cb1178_c5/f2p0/1389     |     |      |      |      |      |      |      |      |
| isoform=cb1178_c29;full_length_coverage=1;non_full_length_coverage=0;isoform_length=1155;expected_accuracy=0.995     | isoform=cb1178_c5;full_length_coverage=1;non_full_length_coverage=0;isoform_length=1389;expected_accuracy=0.995     |                         | 117 | 1167 | 1    | 116  | 321  | 137  | 85   | 200  |

|                                                                                                                  |                                                                                                                      |                          |     |      |      |      |     |      |      |      |
|------------------------------------------------------------------------------------------------------------------|----------------------------------------------------------------------------------------------------------------------|--------------------------|-----|------|------|------|-----|------|------|------|
| cb2779_c6/f1p0/1723                                                                                              | gnl BL_ORD_ID 39065                                                                                                  | cb2779_c3/f1p1/3765      |     |      |      |      |     | 1    |      |      |
| isoform=cb2779_c6;full_length_coverage=1;non_full_length_coverage=0;isoform_length=1723;expected_accuracy=0.997  | isoform=cb2779_c3;full_length_coverage=1;non_full_length_coverage=1;isoform_length=3765;expected_accuracy=0.991      |                          | 1   | 1095 | 1094 | 1702 | 1   | 1098 | 2990 | 3603 |
| cb8564_c119015/f1p10/3431                                                                                        | gnl BL_ORD_ID 16877                                                                                                  | cb8564_c54048/f1p0/3516  |     |      |      |      |     |      |      |      |
|                                                                                                                  | isoform=cb8564_c54048;full_length_coverage=1;non_full_length_coverage=0;isoform_length=3516;expected_accuracy=0.997  |                          | 1   | 2280 | 2280 | 3257 | 1   | 2283 | 2540 | 3516 |
| cb12034_c11/f1p0/1825                                                                                            | gnl BL_ORD_ID 11594                                                                                                  | cb8564_c130303/f1p0/2428 |     |      |      |      |     |      |      |      |
|                                                                                                                  | isoform=cb8564_c130303;full_length_coverage=1;non_full_length_coverage=0;isoform_length=2428;expected_accuracy=0.991 |                          | 282 | 1827 | 9    | 283  | 859 | 2428 | 1    | 274  |
| cb804_c11/f1p0/3984                                                                                              | gnl BL_ORD_ID 8129                                                                                                   | cb804_c4/f1p0/4404       |     |      |      |      |     |      |      |      |
|                                                                                                                  | isoform=cb804_c4;full_length_coverage=1;non_full_length_coverage=0;isoform_length=4404;expected_accuracy=0.995       |                          | 1   | 2686 | 2686 | 3895 | 168 | 2829 | 3200 | 4404 |
| cb3482_c32/f1p0/1683                                                                                             | gnl BL_ORD_ID 71239                                                                                                  | cb3482_c18/f1p1/2089     |     |      |      |      |     |      |      |      |
| isoform=cb3482_c32;full_length_coverage=1;non_full_length_coverage=0;isoform_length=1683;expected_accuracy=1.000 |                                                                                                                      |                          | 1   | 1586 | 1581 | 1683 | 36  | 1636 | 1915 | 2017 |
| cb8916_c4/f9p0/1721                                                                                              | gnl BL_ORD_ID 19815                                                                                                  | cb8916_c26/f1p0/1759     |     |      |      |      |     |      |      |      |
| isoform=cb8916_c4;full_length_coverage=9;non_full_length_coverage=0;isoform_length=1721;expected_accuracy=1.000  | isoform=cb8916_c26;full_length_coverage=1;non_full_length_coverage=0;isoform_length=1759;expected_accuracy=0.999     |                          | 255 | 1721 | 61   | 257  | 289 | 1758 | 1    | 187  |
| cb8564_c40764/f1p0/2563                                                                                          | gnl BL_ORD_ID 55317                                                                                                  | cb8564_c38251/f1p0/3243  |     |      |      |      |     |      |      |      |
|                                                                                                                  |                                                                                                                      |                          | 1   | 2166 | 2162 | 2563 | 1   | 218  | 2391 | 279  |

|                                                                                                                     |                                                                                                                                                                         |     |      |      |      |      |          |      |          |
|---------------------------------------------------------------------------------------------------------------------|-------------------------------------------------------------------------------------------------------------------------------------------------------------------------|-----|------|------|------|------|----------|------|----------|
| isoform=cb8564_c40764;full_length_coverage=1;non_full_length_coverage=0;isoform_length=2563;expected_accuracy=0.997 |                                                                                                                                                                         |     |      |      |      |      |          | 3    | 2        |
| cb1512_c15/f1p1/3322                                                                                                | gnl BL_ORD_ID 27953      cb1512_c0/f2p2/4265<br>isoform=cb1512_c0;full_length_coverage=2;non_full_length_coverage=2;isoform_length=4265;expected_accuracy=0.996         | 1   | 1682 | 1681 | 3311 | 118  | 179<br>7 | 2563 | 422<br>1 |
| cb5480_c1/f1p0/3608                                                                                                 | gnl BL_ORD_ID 13864      cb8564_c22844/f1p2/4014<br>isoform=cb8564_c22844;full_length_coverage=1;non_full_length_coverage=2;isoform_length=4014;expected_accuracy=0.998 | 106 | 2688 | 2687 | 3160 | 4014 | 143<br>3 | 473  | 1        |
| cb10054_c49/f1p1/1123                                                                                               | isoform=cb10054_c49;full_length_coverage=1;non_full_length_coverage=1;isoform_length=1123;expected_accuracy=1.000                                                       |     |      |      |      |      |          |      |          |
|                                                                                                                     | gnl BL_ORD_ID 48165      cb10171_c9/f1p0/2516                                                                                                                           | 258 | 1122 | 3    | 262  | 449  | 131<br>4 | 2    | 268      |
| cb8564_c43450/f1p0/2695                                                                                             | gnl BL_ORD_ID 56036      cb8564_c52952/f1p0/3129                                                                                                                        | 15  | 1886 | 1882 | 2714 | 22   | 190<br>0 | 2015 | 284<br>8 |
| cb6719_c31/f1p0/2434                                                                                                | gnl BL_ORD_ID 4663      cb6719_c20/f1p0/3262<br>isoform=cb6719_c31;full_length_coverage=1;non_full_length_coverage=0;isoform_length=2434;expected_accuracy=0.995        | 1   | 1331 | 1330 | 2351 | 774  | 2119     | 2240 | 326<br>2 |
| cb5290_c43/f1p0/2774                                                                                                | gnl BL_ORD_ID 44595      cb5290_c41/f1p1/3038<br>isoform=cb5290_c41;full_length_coverage=1;non_full_length_coverage=1;isoform_length=3038;expected_accuracy=0.997       | 235 | 2771 | 1    | 236  | 381  | 291<br>7 | 5    | 248      |
| cb2707_c10/f3p0/2850                                                                                                | gnl BL_ORD_ID 38446      cb2707_c18/f1p1/3468                                                                                                                           | 1   | 2379 | 2376 | 2836 | 304  | 267      | 3007 | 346      |

|                                                                                                                                                 |                                                                                                                                                                                  |      |      |      |      |      |      |      |  |      |
|-------------------------------------------------------------------------------------------------------------------------------------------------|----------------------------------------------------------------------------------------------------------------------------------------------------------------------------------|------|------|------|------|------|------|------|--|------|
| isoform=cb2707_c10;full_length_coverage=3;non_full_length_coverage=0;isoform_length=2850;expected_accuracy=1.000<br>cb2825_c0/f7p1/2163         | isoform=cb2707_c18;full_length_coverage=1;non_full_length_coverage=1;isoform_length=3468;expected_accuracy=0.997<br>gnl BL_ORD_ID 38762                      cb2825_c3/f2p1/2885 |      |      |      |      |      |      | 9    |  | 8    |
| isoform=cb2825_c0;full_length_coverage=7;non_full_length_coverage=1;isoform_length=2163;expected_accuracy=1.000                                 | isoform=cb2825_c3;full_length_coverage=2;non_full_length_coverage=1;isoform_length=2885;expected_accuracy=0.997                                                                  | 242  | 2163 | 85   | 243  | 966  | 2885 | 3    |  | 157  |
| cb14125_c138/f1p0/1025                                                                                                                          | gnl BL_ORD_ID 57284   cb8564_c88984/f1p0/3187                                                                                                                                    | 214  | 1025 | 27   | 217  | 662  | 1473 | 2    |  | 192  |
| cb14220_c21/f1p1/5537                                                                                                                           | gnl BL_ORD_ID 63136   cb14220_c12/f1p0/6602                                                                                                                                      | 1    | 4570 | 4569 | 5549 | 793  | 5353 | 5475 |  | 6470 |
| cb6181_c55/f1p1/2098                                                                                                                            | gnl BL_ORD_ID 49492   cb6181_c34/f1p0/2542                                                                                                                                       | 1    | 1528 | 1526 | 2098 | 6    | 1520 | 1694 |  | 2257 |
| isoform=cb6181_c55;full_length_coverage=1;non_full_length_coverage=1;isoform_length=2098;expected_accuracy=0.991<br>cb8564_c67517/f12p1/3027    | gnl BL_ORD_ID 17457                      cb8564_c80400/f1p0/3071                                                                                                                 |      |      |      |      |      |      |      |  |      |
| isoform=cb8564_c67517;full_length_coverage=12;non_full_length_coverage=1;isoform_length=3027;expected_accuracy=1.000                            | isoform=cb8564_c80400;full_length_coverage=1;non_full_length_coverage=0;isoform_length=3071;expected_accuracy=0.998                                                              | 1329 | 3026 | 105  | 1328 | 1378 | 3069 | 43   |  | 1269 |
| cb12714_c29/f1p2/1583                                                                                                                           | gnl BL_ORD_ID 52794   cb8564_c14070/f1p1/2667                                                                                                                                    | 1    | 1296 | 1293 | 1597 | 1    | 1295 | 2299 |  | 2603 |
| cb8564_c42814/f1p0/2151                                                                                                                         | gnl BL_ORD_ID 55415   cb8564_c41076/f2p1/3193                                                                                                                                    | 650  | 2151 | 7    | 652  | 1624 | 3127 | 1    |  | 647  |
| isoform=cb8564_c42814;full_length_coverage=1;non_full_length_coverage=0;isoform_length=2151;expected_accuracy=0.993<br>cb8564_c112885/f1p1/1941 | gnl BL_ORD_ID 16450                      cb8564_c72442/f2p1/2290                                                                                                                 | 585  | 1713 | 7    | 586  | 1158 | 228  | 2    |  | 583  |

|                         |                                                                                                                     |     |      |      |      |     |      |      |      |  |
|-------------------------|---------------------------------------------------------------------------------------------------------------------|-----|------|------|------|-----|------|------|------|--|
|                         | isoform=cb8564_c72442;full_length_coverage=2;non_full_length_coverage=1;isoform_length=2290;expected_accuracy=0.994 |     |      |      |      |     |      | 8    |      |  |
| cb12714_c29/f1p2/1583   | gnl BL_ORD_ID 52809 cb8564_c14548/f1p0/3030                                                                         | 1   | 1296 | 1293 | 1597 | 13  | 1308 | 2352 | 2656 |  |
| cb8_c39/f6p2/3811       | isoform=cb8_c39;full_length_coverage=6;non_full_length_coverage=2;isoform_length=3811;expected_accuracy=1.000       |     |      |      |      |     |      |      |      |  |
|                         | gnl BL_ORD_ID 59029 cb8_c15/f1p0/4140                                                                               | 201 | 3808 | 102  | 201  | 410 | 4013 | 15   | 115  |  |
| cb5672_c13/f1p0/3266    | gnl BL_ORD_ID 44913 cb5672_c6/f1p0/3840                                                                             |     |      |      |      |     |      |      |      |  |
|                         | isoform=cb5672_c6;full_length_coverage=1;non_full_length_coverage=0;isoform_length=3840;expected_accuracy=0.994     | 2   | 2051 | 2050 | 3064 | 5   | 2044 | 2764 | 3770 |  |
| cb2737_c45/f1p0/2944    | gnl BL_ORD_ID 36735 cb2737_c13/f1p0/3105                                                                            |     |      |      |      |     |      |      |      |  |
|                         | isoform=cb2737_c13;full_length_coverage=1;non_full_length_coverage=0;isoform_length=3105;expected_accuracy=0.995    | 1   | 1476 | 1474 | 2757 | 206 | 1676 | 1808 | 3097 |  |
| cb8205_c12/f1p0/2213    | gnl BL_ORD_ID 8245 cb8205_c5/f2p0/2450                                                                              |     |      |      |      |     |      |      |      |  |
|                         | isoform=cb8205_c5;full_length_coverage=2;non_full_length_coverage=0;isoform_length=2450;expected_accuracy=0.999     | 1   | 1248 | 1244 | 2223 | 20  | 1250 | 1471 | 2448 |  |
| cb18456_c7627/f1p0/1639 | isoform=cb18456_c7627;full_length_coverage=1;non_full_length_coverage=0;isoform_length=1639;expected_accuracy=0.990 |     |      |      |      |     |      |      |      |  |
|                         | gnl BL_ORD_ID 57276 cb8564_c88788/f1p0/1896                                                                         | 1   | 1300 | 1299 | 1639 | 11  | 1304 | 1553 | 1893 |  |
| cb8564_c49562/f1p0/2838 | gnl BL_ORD_ID 15169 cb8564_c40218/f1p0/3146                                                                         | 2   | 2331 | 2327 | 2836 | 1   | 231  | 2641 | 314  |  |



|                                                                                                                                                 |                                                                                                                                                                         |      |      |      |      |      |      |      |      |
|-------------------------------------------------------------------------------------------------------------------------------------------------|-------------------------------------------------------------------------------------------------------------------------------------------------------------------------|------|------|------|------|------|------|------|------|
| isoform=cb8564_c49562;full_length_coverage=1;non_full_length_coverage=0;isoform_length=2838;expected_accuracy=0.995<br>cb8564_c182028/f1p0/2513 | isoform=cb8564_c40218;full_length_coverage=1;non_full_length_coverage=0;isoform_length=3146;expected_accuracy=0.993<br>gnl BL_ORD_ID 10074      cb8564_c11613/f1p0/2758 |      |      |      |      |      | 3    |      | 6    |
| isoform=cb8564_c182028;full_length_coverage=1;non_full_length_coverage=0;isoform_length=2513;expected_accuracy=0.996<br>cb5037_c0/f6p0/2322     | isoform=cb8564_c11613;full_length_coverage=1;non_full_length_coverage=0;isoform_length=2758;expected_accuracy=0.991<br>gnl BL_ORD_ID 43673      cb5037_c5/f1p0/2410     | 1    | 1971 | 1968 | 2513 | 3    | 2018 | 2165 | 2722 |
| isoform=cb5037_c0;full_length_coverage=6;non_full_length_coverage=0;isoform_length=2322;expected_accuracy=1.000<br>cb15082_c1/f1p0/1736         | isoform=cb5037_c5;full_length_coverage=1;non_full_length_coverage=0;isoform_length=2410;expected_accuracy=1.000<br>gnl BL_ORD_ID 55711      cb8564_c4953/f1p0/2075      | 1080 | 2307 | 1    | 1084 | 1183 | 2410 | 1    | 1082 |
| cb1770_c20/f1p1/3435                                                                                                                            | gnl BL_ORD_ID 33526      cb1770_c15/f1p0/3678<br>isoform=cb1770_c15;full_length_coverage=1;non_full_length_coverage=0;isoform_length=3678;expected_accuracy=0.992       | 120  | 1736 | 1    | 120  | 347  | 1963 | 26   | 145  |
| cb8564_c85207/f1p0/2727                                                                                                                         | gnl BL_ORD_ID 17771      cb8564_c87457/f2p0/2828<br>isoform=cb8564_c87457;full_length_coverage=2;non_full_length_coverage=0;isoform_length=2828;expected_accuracy=1.000 | 1    | 1782 | 1781 | 3407 | 149  | 1933 | 2049 | 3678 |
| isoform=cb8564_c85207;full_length_coverage=1;non_full_length_coverage=0;isoform_length=2727;expected_accuracy=0.997<br>cb8564_c36689/f1p1/2368  | gnl BL_ORD_ID 17771      cb8564_c87457/f2p0/2828<br>isoform=cb8564_c87457;full_length_coverage=2;non_full_length_coverage=0;isoform_length=2828;expected_accuracy=1.000 | 430  | 2727 | 9    | 433  | 529  | 2828 | 1    | 425  |
| isoform=cb8564_c36689;full_length_coverage=1;non_full_length_coverage=1;isoform_length=2368;expected_accuracy=0.991<br>cb8564_c40598/f1p4/3119  | gnl BL_ORD_ID 55371      cb8564_c39756/f1p1/3004<br>gnl BL_ORD_ID 55837      cb8564_c43074/f1p0/3464                                                                    | 1    | 1709 | 1706 | 2354 | 1    | 1675 | 2174 | 2839 |
|                                                                                                                                                 |                                                                                                                                                                         | 26   | 2732 | 2729 | 3053 | 37   | 275  | 2871 | 319  |



|                                                                                                                                                  |                                                                                                                                                                                  |     |      |      |      |     |      |      |      |
|--------------------------------------------------------------------------------------------------------------------------------------------------|----------------------------------------------------------------------------------------------------------------------------------------------------------------------------------|-----|------|------|------|-----|------|------|------|
| cb6084_c4/f1p0/2878<br>isoform=cb6084_c4;full_length_coverage=1;non_full_length_coverage=0;isoform_length=2878;expected_accuracy=0.997           | ccuracy=0.998<br>gnl BL_ORD_ID 44988      cb6084_c3/f1p0/4275<br>isoform=cb6084_c3;full_length_coverage=1;non_full_length_coverage=0;isoform_length=4275;expected_accuracy=0.993 | 1   | 1782 | 1781 | 2878 | 79  | 1858 | 3139 | 4239 |
| cb280_c71/f1p0/3805<br>isoform=cb280_c71;full_length_coverage=1;non_full_length_coverage=0;isoform_length=3805;expected_accuracy=0.994           | gnl BL_ORD_ID 37402      cb280_c74/f1p0/4024<br>isoform=cb280_c74;full_length_coverage=1;non_full_length_coverage=0;isoform_length=4024;expected_accuracy=0.997                  | 1   | 3085 | 3085 | 3805 | 17  | 3100 | 3304 | 4022 |
| cb13762_c16/f1p0/1376<br>isoform=cb13762_c16;full_length_coverage=1;non_full_length_coverage=0;isoform_length=1376;expected_accuracy=0.996       | gnl BL_ORD_ID 25473      cb13762_c8/f1p0/1530<br>isoform=cb13762_c8;full_length_coverage=1;non_full_length_coverage=0;isoform_length=1530;expected_accuracy=0.991                | 110 | 1338 | 1    | 111  | 303 | 1530 | 40   | 150  |
| cb8564_c117686/f1p0/2190<br>isoform=cb8564_c117686;full_length_coverage=1;non_full_length_coverage=0;isoform_length=2190;expected_accuracy=1.000 | gnl BL_ORD_ID 10151      cb8564_c112138/f1p0/2737<br>isoform=cb8564_c112138;full_length_coverage=1;non_full_length_coverage=0;isoform_length=2737;expected_accuracy=0.995        | 1   | 1607 | 1606 | 2189 | 1   | 1606 | 2154 | 2737 |
| cb8564_c15653/f1p4/2475                                                                                                                          | gnl BL_ORD_ID 56021      cb8564_c52557/f1p1/2866                                                                                                                                 | 22  | 2293 | 2289 | 2437 | 86  | 2354 | 2573 | 2720 |
| cb8564_c116421/f1p3/2229<br>isoform=cb8564_c116421;full_length_coverage=1;non_full_length_coverage=3;isoform_length=2229;expected_accuracy=0.992 | gnl BL_ORD_ID 53584      cb8564_c129387/f1p0/3201                                                                                                                                | 1   | 1576 | 1576 | 2187 | 375 | 1949 | 2178 | 2796 |
| cb8564_c38947/f1p0/2650<br>isoform=cb8564_c38947;full_length_coverage=1;non_full_length_coverage=0;isoform_length=2650;expected_                 | gnl BL_ORD_ID 55391      cb8564_c40278/f3p2/3083                                                                                                                                 | 1   | 1441 | 1436 | 2650 | 1   | 1439 | 1656 | 2870 |

|                         |                     |                          |                                                                                                                     |      |      |      |      |      |      |      |      |
|-------------------------|---------------------|--------------------------|---------------------------------------------------------------------------------------------------------------------|------|------|------|------|------|------|------|------|
| accuracy=0.996          |                     |                          |                                                                                                                     |      |      |      |      |      |      |      |      |
| cb1955_c15/flp0/2361    | gnl BL_ORD_ID 35587 | cb1955_c12/flp1/2862     | isoform=cb1955_c12;full_length_coverage=1;non_full_length_coverage=1;isoform_length=2862;expected_accuracy=1.000    | 1053 | 2280 | 1    | 1055 | 1569 | 2789 | 66   | 1120 |
| cb912_c7/flp1/2209      | gnl BL_ORD_ID 59086 | cb912_c5/flp0/3541       | isoform=cb912_c7;full_length_coverage=1;non_full_length_coverage=1;isoform_length=2209;expected_accuracy=1.000      | 1    | 1426 | 1424 | 2169 | 861  | 2286 | 2393 | 3138 |
| cb8564_c40764/flp0/2563 | gnl BL_ORD_ID 54698 | cb8564_c155298/f3p9/3822 | isoform=cb8564_c40764;full_length_coverage=1;non_full_length_coverage=0;isoform_length=2563;expected_accuracy=0.997 | 1    | 2167 | 2162 | 2563 | 1    | 2165 | 2372 | 2773 |
| cb11728_c0/flp0/1316    | gnl BL_ORD_ID 23838 | cb11728_c1/flp0/2287     | isoform=cb11728_c1;full_length_coverage=1;non_full_length_coverage=0;isoform_length=2287;expected_accuracy=0.996    | 616  | 1316 | 8    | 620  | 1587 | 2287 | 3    | 615  |
| cb6339_c16/flp1/2286    | gnl BL_ORD_ID 4268  | cb6339_c89/fl18p1/2676   | isoform=cb6339_c16;full_length_coverage=1;non_full_length_coverage=1;isoform_length=2286;expected_accuracy=0.997    | 1    | 1780 | 1776 | 2283 | 151  | 1932 | 2136 | 2643 |
| cb12714_c29/flp2/1583   | gnl BL_ORD_ID 17008 | cb8564_c55271/flp4/2648  | isoform=cb8564_c55271;full_length_coverage=1;non_full_length_coverage=4;isoform_length=2648;expected_accuracy=0.998 | 1    | 1296 | 1293 | 1537 | 2    | 1308 | 2377 | 2616 |
| cb560_c8/flp0/3610      | gnl BL_ORD_ID 45174 | cb560_c12/flp0/3972      |                                                                                                                     | 1    | 2430 | 2431 | 3459 | 30   | 246  | 2597 | 362  |

|                                                                                                                                          |                                                                                                                                                                         |     |      |      |      |      |     |      |      |
|------------------------------------------------------------------------------------------------------------------------------------------|-------------------------------------------------------------------------------------------------------------------------------------------------------------------------|-----|------|------|------|------|-----|------|------|
| isoform=cb560_c8;full_length_coverage=1;non_full_length_coverage=0;isoform_length=3610;expected_accuracy=0.995<br>cb8564_c1541/f1p0/2233 | isoform=cb560_c12;full_length_coverage=1;non_full_length_coverage=0;isoform_length=3972;expected_accuracy=0.996<br>gnl BL_ORD_ID 13369      cb8564_c18803/f2p0/3233     |     |      |      |      |      | 5   |      | 5    |
| isoform=cb8564_c1541;full_length_coverage=1;non_full_length_coverage=0;isoform_length=2233;expected_accuracy=0.995                       | isoform=cb8564_c18803;full_length_coverage=2;non_full_length_coverage=0;isoform_length=3233;expected_accuracy=1.000<br>gnl BL_ORD_ID 15924      cb8564_c52804/f1p5/3221 | 163 | 2145 | 1    | 163  | 1246 | 323 | 946  | 1102 |
| cb8564_c36731/f1p2/2761                                                                                                                  | isoform=cb8564_c52804;full_length_coverage=1;non_full_length_coverage=5;isoform_length=3221;expected_accuracy=0.999                                                     | 1   | 1977 | 1972 | 2741 | 1    | 197 | 2407 | 317  |
| cb9823_c2/f1p0/1778                                                                                                                      | gnl BL_ORD_ID 58926      cb9823_c1/f1p0/3390                                                                                                                            | 263 | 1720 | 76   | 265  | 1946 | 341 | 1555 | 174  |
| cb1788_c4/f1p0/3161                                                                                                                      | gnl BL_ORD_ID 63962      cb1788_c3/f1p0/3440                                                                                                                            | 2   | 2706 | 2704 | 3097 | 1    | 269 | 3069 | 346  |
| isoform=cb1788_c4;full_length_coverage=1;non_full_length_coverage=0;isoform_length=3161;expected_accuracy=0.997                          | gnl BL_ORD_ID 11667      cb8564_c148356/f4p0/2099                                                                                                                       |     |      |      |      |      |     |      |      |
| cb8564_c115280/f1p0/2295                                                                                                                 | isoform=cb8564_c148356;full_length_coverage=4;non_full_length_coverage=0;isoform_length=2099;expected_accuracy=1.000                                                    | 1   | 1025 | 1025 | 1760 | 7    | 103 | 1364 | 209  |
| cb3143_c8/f1p1/2928                                                                                                                      | gnl BL_ORD_ID 37814      cb3143_c5/f1p3/3440                                                                                                                            |     |      |      |      |      |     |      |      |
| isoform=cb3143_c8;full_length_coverage=1;non_full_length_coverage=1;isoform_length=2928;expected_accuracy=0.992                          | isoform=cb3143_c5;full_length_coverage=1;non_full_length_coverage=3;isoform_length=3440;expected_accuracy=0.999                                                         | 205 | 2928 | 1    | 206  | 676  | 339 | 22   | 227  |
| cb8564_c185920/f1p0/2777                                                                                                                 | gnl BL_ORD_ID 57176      cb8564_c85665/f1p0/3087                                                                                                                        | 174 | 2773 | 1    | 177  | 364  | 296 | 3    | 180  |

|                                                                                                                      |                     |                                                                                                                      |     |      |      |      |     |      |      |      |
|----------------------------------------------------------------------------------------------------------------------|---------------------|----------------------------------------------------------------------------------------------------------------------|-----|------|------|------|-----|------|------|------|
| isoform=cb8564_c185920;full_length_coverage=1;non_full_length_coverage=0;isoform_length=2777;expected_accuracy=0.996 |                     |                                                                                                                      |     |      |      |      |     |      |      | 5    |
| cb8564_c111805/f1p0/2538                                                                                             | gnl BL_ORD_ID 9773  | cb8564_c112780/f1p1/2558                                                                                             |     |      |      |      |     |      |      |      |
| isoform=cb8564_c111805;full_length_coverage=1;non_full_length_coverage=0;isoform_length=2538;expected_accuracy=0.995 |                     | isoform=cb8564_c112780;full_length_coverage=1;non_full_length_coverage=1;isoform_length=2558;expected_accuracy=0.990 | 1   | 1859 | 1859 | 2436 | 1   | 1857 | 1982 | 2558 |
| cb8564_c34238/f4p1/4317                                                                                              | gnl BL_ORD_ID 14314 | cb8564_c45827/f2p2/4435                                                                                              |     |      |      |      |     |      |      |      |
| isoform=cb8564_c34238;full_length_coverage=4;non_full_length_coverage=1;isoform_length=4317;expected_accuracy=1.000  |                     | isoform=cb8564_c45827;full_length_coverage=2;non_full_length_coverage=2;isoform_length=4435;expected_accuracy=0.999  | 16  | 3270 | 3266 | 4178 | 1   | 3255 | 3520 | 4435 |
| cb8564_c23232/f1p3/2540                                                                                              | gnl BL_ORD_ID 55603 | cb8564_c46500/f1p1/2752                                                                                              | 16  | 2172 | 2167 | 2518 | 6   | 2156 | 2258 | 2609 |
| cb2836_c25/f1p0/3140                                                                                                 | gnl BL_ORD_ID 36507 | cb2836_c27/f8p2/3344                                                                                                 |     |      |      |      |     |      |      |      |
| isoform=cb2836_c25;full_length_coverage=1;non_full_length_coverage=0;isoform_length=3140;expected_accuracy=1.000     |                     | isoform=cb2836_c27;full_length_coverage=8;non_full_length_coverage=2;isoform_length=3344;expected_accuracy=1.000     | 1   | 1919 | 1916 | 3139 | 42  | 1960 | 2121 | 3344 |
| cb8564_c18812/f1p1/3920                                                                                              | gnl BL_ORD_ID 52818 | cb8564_c14781/f1p0/4348                                                                                              | 1   | 3309 | 3308 | 3920 | 12  | 3320 | 3444 | 4056 |
| isoform=cb8564_c18812;full_length_coverage=1;non_full_length_coverage=1;isoform_length=3920;expected_accuracy=0.996  |                     |                                                                                                                      |     |      |      |      |     |      |      |      |
| cb8983_c35/f1p0/1566                                                                                                 | gnl BL_ORD_ID 58490 | cb8983_c15/f1p0/2528                                                                                                 | 115 | 1564 | 1    | 118  | 803 | 2254 | 314  | 433  |
| isoform=cb8983_c35;full_length_coverage=1;non_full_length_coverage=0;isoform_length=1566;expected_accuracy=0.999     |                     |                                                                                                                      |     |      |      |      |     |      |      |      |
| cb8564_c13789/f1p1/3323                                                                                              | gnl BL_ORD_ID 15789 | cb8564_c58034/f2p2/3989                                                                                              | 2   | 2821 | 2820 | 3332 | 4   | 283  | 3390 | 390  |

|                                                                                                                      |                                                                                                                      |      |      |      |      |      |      |      |      |
|----------------------------------------------------------------------------------------------------------------------|----------------------------------------------------------------------------------------------------------------------|------|------|------|------|------|------|------|------|
|                                                                                                                      | isoform=cb8564_c58034;full_length_coverage=2;non_full_length_coverage=2;isoform_length=3989;expected_accuracy=0.996  |      |      |      |      |      |      | 0    | 6    |
| cb8564_c69217/f2p0/2619                                                                                              | gnl BL_ORD_ID 15780      cb8564_c74972/f1p0/2743                                                                     |      |      |      |      |      |      |      |      |
| isoform=cb8564_c69217;full_length_coverage=2;non_full_length_coverage=0;isoform_length=2619;expected_accuracy=1.000  | isoform=cb8564_c74972;full_length_coverage=1;non_full_length_coverage=0;isoform_length=2743;expected_accuracy=0.997  | 1    | 2025 | 2024 | 2619 | 3    | 2024 | 2148 | 2742 |
| cb8564_c47011/f1p0/3100                                                                                              | gnl BL_ORD_ID 16622      cb8564_c50151/f1p0/3198                                                                     |      |      |      |      |      |      |      |      |
|                                                                                                                      | isoform=cb8564_c50151;full_length_coverage=1;non_full_length_coverage=0;isoform_length=3198;expected_accuracy=0.995  | 2    | 2306 | 2301 | 2934 | 5    | 2322 | 2560 | 3193 |
| cb8564_c43399/f1p0/2654                                                                                              | gnl BL_ORD_ID 16369      cb8564_c52191/f1p0/2822                                                                     |      |      |      |      |      |      |      |      |
| isoform=cb8564_c43399;full_length_coverage=1;non_full_length_coverage=0;isoform_length=2654;expected_accuracy=0.999  | isoform=cb8564_c52191;full_length_coverage=1;non_full_length_coverage=0;isoform_length=2822;expected_accuracy=0.997  | 134  | 2367 | 2363 | 2653 | 84   | 2316 | 2532 | 2822 |
| cb5091_c4/f1p0/3004                                                                                                  | gnl BL_ORD_ID 73252      cb5091_c0/f1p0/3180                                                                         |      |      |      |      |      |      |      |      |
|                                                                                                                      |                                                                                                                      | 1    | 2580 | 2581 | 2975 | 29   | 2608 | 2736 | 3131 |
| cb8564_c145335/f3p0/1964                                                                                             | gnl BL_ORD_ID 11866      cb8564_c126236/f1p0/2200                                                                    |      |      |      |      |      |      |      |      |
| isoform=cb8564_c145335;full_length_coverage=3;non_full_length_coverage=0;isoform_length=1964;expected_accuracy=0.999 | isoform=cb8564_c126236;full_length_coverage=1;non_full_length_coverage=0;isoform_length=2200;expected_accuracy=0.999 | 136  | 1964 | 1    | 133  | 362  | 2190 | 1    | 133  |
| cb1573_c9/f2p0/3382                                                                                                  | gnl BL_ORD_ID 30372      cb1573_c3/f4p1/3618                                                                         |      |      |      |      |      |      |      |      |
| isoform=cb1573_c9;full_length_coverage=2;non_full_length_coverage=0;isoform_length=3382;expected_accuracy=0.993      | isoform=cb1573_c3;full_length_coverage=4;non_full_length_coverage=1;isoform_length=3618;expected_accuracy=0.996      | 1274 | 3382 | 1    | 1277 | 1497 | 3605 | 51   | 1338 |
| cb3073_c2/f1p0/3478                                                                                                  | gnl BL_ORD_ID 69091      cb3073_c3/f1p0/4308                                                                         |      |      |      |      |      |      |      |      |
|                                                                                                                      |                                                                                                                      | 172  | 3478 | 1    | 176  | 340  | 367  | 55   | 229  |

|                                                                                                                 |                                                                                                                                                                         |      |      |      |      |      |      |      |      |  |
|-----------------------------------------------------------------------------------------------------------------|-------------------------------------------------------------------------------------------------------------------------------------------------------------------------|------|------|------|------|------|------|------|------|--|
| isoform=cb3073_c2;full_length_coverage=1;non_full_length_coverage=0;isoform_length=3478;expected_accuracy=0.996 |                                                                                                                                                                         |      |      |      |      |      |      | 8    |      |  |
| cb8564_c14882/f1p0/2156                                                                                         | gnl BL_ORD_ID 14463      cb8564_c25154/f1p5/4276<br>isoform=cb8564_c25154;full_length_coverage=1;non_full_length_coverage=5;isoform_length=4276;expected_accuracy=0.995 | 237  | 2098 | 50   | 238  | 2415 | 4276 | 1    | 189  |  |
| cb8564_c13598/f1p0/3018                                                                                         | gnl BL_ORD_ID 52054      cb8564_c11371/f1p2/3552<br>isoform=cb8564_c13598;full_length_coverage=1;non_full_length_coverage=0;isoform_length=3018;expected_accuracy=0.997 | 175  | 3016 | 1    | 180  | 443  | 3285 | 44   | 223  |  |
| cb3482_c32/f1p0/1683                                                                                            | gnl BL_ORD_ID 40354      cb3482_c8/f3p1/2169<br>isoform=cb3482_c8;full_length_coverage=3;non_full_length_coverage=0;isoform_length=1683;expected_accuracy=1.000         | 1    | 1586 | 1581 | 1683 | 148  | 1733 | 2012 | 2114 |  |
| cb8564_c47522/f1p0/2954                                                                                         | gnl BL_ORD_ID 14531      cb8564_c41778/f1p9/3482<br>isoform=cb8564_c41778;full_length_coverage=1;non_full_length_coverage=9;isoform_length=3482;expected_accuracy=0.992 | 222  | 2849 | 1    | 226  | 812  | 3439 | 1    | 247  |  |
| cb8564_c45699/f1p0/3005                                                                                         | gnl BL_ORD_ID 16705      cb8564_c53880/f1p0/3484<br>isoform=cb8564_c53880;full_length_coverage=1;non_full_length_coverage=0;isoform_length=3484;expected_accuracy=0.996 | 1039 | 2848 | 1    | 1040 | 1672 | 3484 | 1    | 1056 |  |
| cb8101_c9/f1p0/2203                                                                                             | gnl BL_ORD_ID 6421      cb8101_c19/f1p0/2535<br>isoform=cb8101_c9;full_length_coverage=1;non_full_length_coverage=0;isoform_length=2203;expected_accuracy=0.996         | 1    | 1617 | 1613 | 2203 | 227  | 1839 | 1953 | 2533 |  |



|                                                                                                                                                               |                                                                                                                                                                        |      |      |      |      |      |      |      |      |
|---------------------------------------------------------------------------------------------------------------------------------------------------------------|------------------------------------------------------------------------------------------------------------------------------------------------------------------------|------|------|------|------|------|------|------|------|
| acy=0.997<br>cb8564_c188097/f1p0/2552<br>isoform=cb8564_c188097;full_length_coverage=1;non_full_length_coverage=0;isoform_length=2552;expected_accuracy=0.996 | acy=0.998<br>gnl BL_ORD_ID 52776 cb8564_c13457/f1p1/2717                                                                                                               | 1    | 1945 | 1940 | 2551 | 1    | 1945 | 2095 | 2706 |
| cb965_c18/f1p0/2545<br>isoform=cb965_c18;full_length_coverage=1;non_full_length_coverage=0;isoform_length=2545;expected_accuracy=1.000                        | gnl BL_ORD_ID 20578 cb965_c23/f1p0/4205<br>isoform=cb965_c23;full_length_coverage=1;non_full_length_coverage=0;isoform_length=4205;expected_accuracy=0.999             | 1    | 1828 | 1831 | 2496 | 1480 | 3304 | 3531 | 4205 |
| cb8564_c5122/f1p0/3329                                                                                                                                        | gnl BL_ORD_ID 12422 cb8564_c132795/f5p10/3729<br>isoform=cb8564_c132795;full_length_coverage=5;non_full_length_coverage=10;isoform_length=3729;expected_accuracy=0.999 | 1067 | 3334 | 1    | 1069 | 1368 | 3637 | 6    | 1076 |
| cb9549_c8/f1p0/1542<br>isoform=cb9549_c8;full_length_coverage=1;non_full_length_coverage=0;isoform_length=1542;expected_accuracy=1.000                        | gnl BL_ORD_ID 59798 cb9549_c2/f1p0/2047                                                                                                                                | 114  | 1542 | 1    | 115  | 354  | 1782 | 69   | 183  |
| cb8617_c4/f1p0/2294<br>isoform=cb8617_c4;full_length_coverage=1;non_full_length_coverage=0;isoform_length=2294;expected_accuracy=1.000                        | gnl BL_ORD_ID 57451 cb8617_c3/f1p0/2761                                                                                                                                | 1    | 1463 | 1461 | 2220 | 41   | 1505 | 1936 | 2698 |
| cb6452_c4/f1p3/2166<br>isoform=cb6452_c4;full_length_coverage=1;non_full_length_coverage=3;isoform_length=2166;expected_accuracy=1.000                        | gnl BL_ORD_ID 49738 cb6452_c7/f1p1/2312                                                                                                                                | 1    | 1320 | 1316 | 2130 | 4    | 1323 | 1455 | 2269 |
| cb5183_c56/f1p0/1814                                                                                                                                          | gnl BL_ORD_ID 46058 cb5183_c19/f1p0/3158                                                                                                                               | 1    | 1185 | 1183 | 1643 | 6    | 1185 | 2686 | 314  |

|                                                                                                                      |                                                                                                                     |      |      |      |      |      |     |      |     |   |
|----------------------------------------------------------------------------------------------------------------------|---------------------------------------------------------------------------------------------------------------------|------|------|------|------|------|-----|------|-----|---|
|                                                                                                                      | isoform=cb5183_c19;full_length_coverage=1;non_full_length_coverage=0;isoform_length=3158;expected_accuracy=0.993    |      |      |      |      |      |     |      |     | 6 |
| cb4063_c27/f2p0/2863                                                                                                 | gnl BL_ORD_ID 40734      cb4063_c7/f1p0/2935                                                                        |      |      |      |      |      |     |      |     |   |
| isoform=cb4063_c27;full_length_coverage=2;non_full_length_coverage=0;isoform_length=2863;expected_accuracy=1.000     | isoform=cb4063_c7;full_length_coverage=1;non_full_length_coverage=0;isoform_length=2935;expected_accuracy=0.996     | 113  | 1512 | 1512 | 2861 | 1    | 140 | 1585 | 293 | 5 |
| cb8564_c38131/f1p1/2108                                                                                              | gnl BL_ORD_ID 13750      cb8564_c23112/f1p0/2272                                                                    |      |      |      |      |      |     |      |     |   |
|                                                                                                                      | isoform=cb8564_c23112;full_length_coverage=1;non_full_length_coverage=0;isoform_length=2272;expected_accuracy=0.999 | 10   | 1587 | 1585 | 1955 | 2    | 158 | 1901 | 227 | 2 |
| cb3884_c13/f1p0/2172                                                                                                 |                                                                                                                     |      |      |      |      |      |     |      |     |   |
| isoform=cb3884_c13;full_length_coverage=1;non_full_length_coverage=0;isoform_length=2172;expected_accuracy=0.996     | gnl BL_ORD_ID 71594      cb3884_c11/f1p0/2228                                                                       | 655  | 2172 | 71   | 656  | 708  | 222 | 1    | 586 |   |
| cb804_c7/f1p0/3407                                                                                                   |                                                                                                                     |      |      |      |      |      |     |      |     |   |
| isoform=cb804_c7;full_length_coverage=1;non_full_length_coverage=0;isoform_length=3407;expected_accuracy=0.997       | gnl BL_ORD_ID 50990      cb804_c11/f1p0/3984                                                                        | 1521 | 3407 | 132  | 1525 | 2009 | 389 | 1    | 144 | 0 |
| cb8564_c178226/f1p0/2728                                                                                             | gnl BL_ORD_ID 16805      cb8564_c66657/f4p6/2862                                                                    |      |      |      |      |      |     |      |     |   |
| isoform=cb8564_c178226;full_length_coverage=1;non_full_length_coverage=0;isoform_length=2728;expected_accuracy=0.998 | isoform=cb8564_c66657;full_length_coverage=4;non_full_length_coverage=6;isoform_length=2862;expected_accuracy=1.000 | 1284 | 2726 | 1    | 1288 | 1419 | 286 | 29   | 131 | 5 |
| cb4576_c55/f1p2/3996                                                                                                 |                                                                                                                     |      |      |      |      |      |     |      |     |   |
| isoform=cb4576_c55;full_length_coverage=1;non_full_length_coverage=2;isoform_length=3996;expected_accuracy=0.999     | gnl BL_ORD_ID 72703      cb4576_c56/f1p0/4266                                                                       | 172  | 3227 | 3225 | 3986 | 1    | 305 | 3497 | 425 | 9 |

|                                                                                                                                                                   |                                                                                                                                                                                           |     |      |      |      |     |      |      |
|-------------------------------------------------------------------------------------------------------------------------------------------------------------------|-------------------------------------------------------------------------------------------------------------------------------------------------------------------------------------------|-----|------|------|------|-----|------|------|
| racy=0.994<br>cb7972_c4/f1p0/2284<br>isoform=cb7972_c4;full_length_coverage=1;non_full_length_coverage=0;isoform_length=2284;expected_accuracy=0.990              | gnl BL_ORD_ID 8321                      cb7972_c3/f1p0/2475<br>isoform=cb7972_c3;full_length_coverage=1;non_full_length_coverage=0;isoform_length=2475;expected_accuracy=0.998            | 1   | 1463 | 1460 | 2284 | 3   | 1461 | 2468 |
| cb13355_c13/f1p0/1325<br>isoform=cb13355_c13;full_length_coverage=1;non_full_length_coverage=0;isoform_length=1325;expected_accuracy=0.994                        | gnl BL_ORD_ID 25370                      cb13355_c3/f2p0/1541<br>isoform=cb13355_c3;full_length_coverage=2;non_full_length_coverage=0;isoform_length=1541;expected_accuracy=1.000         | 377 | 1325 | 6    | 378  | 488 | 1438 | 372  |
| cb8564_c36731/f1p2/2761<br>cb7774_c9/f1p0/3888<br>isoform=cb7774_c9;full_length_coverage=1;non_full_length_coverage=0;isoform_length=3888;expected_accuracy=0.999 | gnl BL_ORD_ID 55551      cb8564_c44964/f1p0/3508<br>gnl BL_ORD_ID 51513      cb7774_c3/f1p0/4456                                                                                          | 1   | 1977 | 1972 | 2738 | 1   | 1976 | 3173 |
| cb8564_c49090/f1p0/3264                                                                                                                                           | gnl BL_ORD_ID 56041      cb8564_c53077/f1p2/3406                                                                                                                                          | 405 | 3242 | 72   | 405  | 452 | 3287 | 337  |
| cb8564_c21764/f1p0/2599                                                                                                                                           | gnl BL_ORD_ID 12023                      cb8564_c146372/f9p3/2654<br>isoform=cb8564_c146372;full_length_coverage=9;non_full_length_coverage=3;isoform_length=2654;expected_accuracy=0.999 | 1   | 2030 | 2030 | 2619 | 69  | 2096 | 2569 |
| cb2804_c229/f1p1/1373<br>isoform=cb2804_c229;full_length_coverage=1;non_full_length_coverage=1;isoform_length=1373;expected_accuracy=0.991                        | gnl BL_ORD_ID 38911                      cb2804_c50/f2p0/2193<br>isoform=cb2804_c50;full_length_coverage=2;non_full_length_coverage=0;isoform_length=2193;expected_accuracy=0.992         | 137 | 1371 | 3    | 139  | 619 | 1850 | 133  |
| cb8564_c927/f7p2/2538                                                                                                                                             | gnl BL_ORD_ID 13896                      cb8564_c4136/f2p1/2697                                                                                                                           | 1   | 2237 | 2233 | 2458 | 10  | 224  | 269  |

|                                                                                                                      |                                                                                                                      |     |      |      |      |     |      |      |     |   |
|----------------------------------------------------------------------------------------------------------------------|----------------------------------------------------------------------------------------------------------------------|-----|------|------|------|-----|------|------|-----|---|
| isoform=cb8564_c927;full_length_coverage=7;non_full_length_coverage=2;isoform_length=2538;expected_accuracy=1.000    | isoform=cb8564_c4136;full_length_coverage=2;non_full_length_coverage=1;isoform_length=2697;expected_accuracy=1.000   |     |      |      |      |     |      | 6    |     | 7 |
| cb4664_c15/f1p0/2526                                                                                                 | gnl BL_ORD_ID 72828 cb4664_c13/f1p0/2651                                                                             | 229 | 2260 | 7    | 232  | 588 | 261  | 3    | 229 |   |
| cb8564_c106956/f4p6/2390                                                                                             | gnl BL_ORD_ID 14642 cb8564_c33936/f7p0/2581                                                                          |     |      |      |      |     |      |      |     |   |
| isoform=cb8564_c106956;full_length_coverage=4;non_full_length_coverage=6;isoform_length=2390;expected_accuracy=0.999 | isoform=cb8564_c33936;full_length_coverage=7;non_full_length_coverage=0;isoform_length=2581;expected_accuracy=0.998  | 1   | 1359 | 1359 | 2293 | 1   | 135  | 1647 | 258 | 1 |
| cb5082_c7/f1p0/2984                                                                                                  | gnl BL_ORD_ID 42252 cb5082_c5/f1p0/3051                                                                              |     |      |      |      |     |      |      |     |   |
| isoform=cb5082_c5;full_length_coverage=1;non_full_length_coverage=0;isoform_length=3051;expected_accuracy=0.992      | isoform=cb5082_c5;full_length_coverage=1;non_full_length_coverage=0;isoform_length=3051;expected_accuracy=0.992      | 1   | 1872 | 1873 | 2892 | 25  | 189  | 2019 | 305 | 1 |
| cb2753_c18/f1p0/2859                                                                                                 | gnl BL_ORD_ID 69948 cb2753_c22/f1p0/3667                                                                             | 1   | 2193 | 2191 | 2568 | 689 | 288  | 3164 | 354 | 1 |
| cb12931_c15/f1p0/1493                                                                                                | gnl BL_ORD_ID 12863 cb8564_c178653/f1p0/2779                                                                         |     |      |      |      |     |      |      |     |   |
| isoform=cb12931_c15;full_length_coverage=1;non_full_length_coverage=0;isoform_length=1493;expected_accuracy=1.000    | isoform=cb8564_c178653;full_length_coverage=1;non_full_length_coverage=0;isoform_length=2779;expected_accuracy=0.994 | 1   | 1106 | 1104 | 1464 | 1   | 1104 | 2419 | 277 | 9 |
| cb8564_c40598/f1p4/3119                                                                                              | gnl BL_ORD_ID 56764 cb8564_c70795/f1p0/3769                                                                          | 19  | 2732 | 2729 | 3059 | 34  | 274  | 2867 | 319 | 2 |
| cb2985_c4/f1p0/3241                                                                                                  | gnl BL_ORD_ID 37919 cb2985_c15/f1p2/3532                                                                             |     |      |      |      |     |      |      |     |   |
| isoform=cb2985_c4;full_length_coverage=1;non_full_length_coverage=0;isoform_length=3241;expected_accuracy=0.994      | isoform=cb2985_c15;full_length_coverage=1;non_full_length_coverage=2;isoform_length=3532;expected_accuracy=0.998     | 1   | 1966 | 1967 | 3241 | 1   | 197  | 2185 | 346 | 1 |
| cb2155_c25/f2p1/2883                                                                                                 | gnl BL_ORD_ID 35909 cb2155_c6/f2p0/3314                                                                              | 100 | 1788 | 1786 | 2883 | 1   | 168  | 2196 | 329 |   |

|                                                                                                                     |                                                                                                                 |     |      |      |      |      |     |      |   |     |
|---------------------------------------------------------------------------------------------------------------------|-----------------------------------------------------------------------------------------------------------------|-----|------|------|------|------|-----|------|---|-----|
| isoform=cb2155_c25;full_length_coverage=2;non_full_length_coverage=1;isoform_length=2883;expected_accuracy=0.996    | isoform=cb2155_c6;full_length_coverage=2;non_full_length_coverage=0;isoform_length=3314;expected_accuracy=0.997 |     |      |      |      |      |     | 7    |   | 7   |
| cb8564_c39149/f1p0/3375                                                                                             | gnl BL_ORD_ID 58134 cb8564_c89788/f1p0/3521                                                                     | 136 | 3211 | 1    | 135  | 294  | 336 | 9    | 9 | 143 |
| cb8564_c43779/f1p0/3021                                                                                             |                                                                                                                 |     |      |      |      |      |     |      |   |     |
| isoform=cb8564_c43779;full_length_coverage=1;non_full_length_coverage=0;isoform_length=3021;expected_accuracy=0.993 | gnl BL_ORD_ID 53680 cb8564_c153222/f2p39/3454                                                                   | 1   | 2344 | 2345 | 3009 | 7    | 235 | 2507 |   | 317 |
|                                                                                                                     |                                                                                                                 |     |      |      |      |      | 1   |      |   | 0   |
| cb14968_c11/f1p0/1127                                                                                               | gnl BL_ORD_ID 64376 cb14968_c10/f1p0/1444                                                                       | 149 | 1132 | 30   | 149  | 235  | 121 | 6    |   | 121 |
|                                                                                                                     |                                                                                                                 |     |      |      |      |      | 8   |      |   |     |
| cb8564_c36689/f1p1/2368                                                                                             |                                                                                                                 |     |      |      |      |      |     |      |   |     |
| isoform=cb8564_c36689;full_length_coverage=1;non_full_length_coverage=1;isoform_length=2368;expected_accuracy=0.991 | gnl BL_ORD_ID 55873 cb8564_c47701/f1p0/3144                                                                     | 12  | 1709 | 1706 | 2368 | 24   | 171 | 2212 |   | 287 |
|                                                                                                                     |                                                                                                                 |     |      |      |      |      | 3   |      |   | 6   |
| cb8564_c43587/f1p0/2930                                                                                             | gnl BL_ORD_ID 55362 cb8564_c39584/f2p3/4364                                                                     | 12  | 1700 | 1699 | 2936 | 15   | 170 | 1599 |   | 284 |
|                                                                                                                     |                                                                                                                 |     |      |      |      |      | 5   |      |   | 2   |
| cb206_c10/f1p0/1588                                                                                                 | gnl BL_ORD_ID 36416 cb206_c9/f1p0/2615                                                                          |     |      |      |      |      |     |      |   |     |
|                                                                                                                     | isoform=cb206_c9;full_length_coverage=1;non_full_length_coverage=0;isoform_length=2615;expected_accuracy=1.000  | 405 | 1377 | 43   | 406  | 1641 | 261 | 1    |   | 364 |
|                                                                                                                     |                                                                                                                 |     |      |      |      |      | 4   |      |   |     |
| cb3513_c28/f18p0/2970                                                                                               | gnl BL_ORD_ID 40099 cb3513_c7/f2p1/3768                                                                         |     |      |      |      |      |     |      |   |     |
| isoform=cb3513_c28;full_length_coverage=18;non_full_length_coverage=0;isoform_length=2970;expected_accuracy=1.000   | isoform=cb3513_c7;full_length_coverage=2;non_full_length_coverage=1;isoform_length=3768;expected_accuracy=1.000 | 1   | 1551 | 1551 | 2970 | 1    | 155 | 1866 |   | 328 |
|                                                                                                                     |                                                                                                                 |     |      |      |      |      | 1   |      |   | 9   |
| cb8564_c40764/f1p0/2563                                                                                             | gnl BL_ORD_ID 9418 cb8564_c119193/f1p2/2975                                                                     | 1   | 2167 | 2162 | 2563 | 1    | 218 | 2391 |   | 279 |

|                                                                                                                     |                                                                                                                                                                    |     |      |      |      |      |      |      |      |
|---------------------------------------------------------------------------------------------------------------------|--------------------------------------------------------------------------------------------------------------------------------------------------------------------|-----|------|------|------|------|------|------|------|
| isoform=cb8564_c40764;full_length_coverage=1;non_full_length_coverage=0;isoform_length=2563;expected_accuracy=0.997 | isoform=cb8564_c119193;full_length_coverage=1;non_full_length_coverage=2;isoform_length=2975;expected_accuracy=0.998                                               |     |      |      |      |      |      | 2    | 5    |
| cb1505_c17/f1p1/1887                                                                                                | gnl BL_ORD_ID 63682 cb1505_c24/f1p0/2552                                                                                                                           | 1   | 1205 | 1203 | 1828 | 13   | 1218 | 1852 | 2478 |
| cb4016_c32/f1p0/1913                                                                                                | gnl BL_ORD_ID 40528 cb4016_c3/f2p0/2850<br>isoform=cb4016_c3;full_length_coverage=2;non_full_length_coverage=0;isoform_length=2850;expected_accuracy=1.000         | 191 | 1929 | 23   | 194  | 1111 | 2850 | 510  | 683  |
| cb1573_c41/f1p0/1724                                                                                                | gnl BL_ORD_ID 28225 cb1573_c19/f1p1/3913<br>isoform=cb1573_c41;full_length_coverage=1;non_full_length_coverage=0;isoform_length=1724;expected_accuracy=1.000       | 1   | 1319 | 1314 | 1721 | 33   | 1352 | 3507 | 3913 |
| cb8564_c13789/f1p1/3323                                                                                             | gnl BL_ORD_ID 11922 cb8564_c15087/f1p1/3594<br>isoform=cb8564_c15087;full_length_coverage=1;non_full_length_coverage=1;isoform_length=3594;expected_accuracy=0.996 | 2   | 2821 | 2820 | 3311 | 1    | 2838 | 3103 | 3594 |
| cb7642_c53/f1p0/1947                                                                                                | gnl BL_ORD_ID 7246 cb7642_c26/f2p2/2157<br>isoform=cb7642_c53;full_length_coverage=1;non_full_length_coverage=0;isoform_length=1947;expected_accuracy=0.990        | 1   | 1181 | 1178 | 1947 | 1    | 1183 | 1290 | 2060 |
| cb10054_c49/f1p1/1123                                                                                               | gnl BL_ORD_ID 1796 cb10054_c3/f1p7/1329<br>isoform=cb10054_c49;full_length_coverage=1;non_full_length_coverage=1;isoform_length=1123;expected_accuracy=1.000       | 258 | 1123 | 8    | 262  | 438  | 1306 | 6    | 257  |
| cb16226_c1/f1p0/1638                                                                                                | gnl BL_ORD_ID 17167 cb8564_c87931/f1p0/3852                                                                                                                        | 466 | 1600 | 6    | 469  | 1646 | 277  | 78   | 538  |

|                          |                                                                                                                                                                      |     |      |      |      |      |          |      |          |  |
|--------------------------|----------------------------------------------------------------------------------------------------------------------------------------------------------------------|-----|------|------|------|------|----------|------|----------|--|
|                          | isoform=cb8564_c87931;full_length_coverage=1;non_full_length_coverage=0;isoform_length=3852;expected_accuracy=0.993                                                  |     |      |      |      |      |          | 8    |          |  |
| cb18012_c2/flp0/1829     | gnl BL_ORD_ID 54534 cb8564_c125514/flp0/2141                                                                                                                         | 175 | 1819 | 1    | 176  | 360  | 200<br>4 | 29   | 204      |  |
| cb2873_c11/flp0/3401     | gnl BL_ORD_ID 36904 cb2873_c2/f2p2/3521<br>isoform=cb2873_c2;full_length_coverage=2;non_full_length_coverage=2;isoform_length=3521;expected_accuracy=0.998           | 132 | 3367 | 1    | 132  | 272  | 351<br>0 | 6    | 137      |  |
| cb17397_c0/flp0/1631     | gnl BL_ORD_ID 31786 cb17397_c2/flp0/5709<br>isoform=cb17397_c0;full_length_coverage=1;non_full_length_coverage=0;isoform_length=1631;expected_accuracy=0.999         | 1   | 1070 | 1065 | 1631 | 3374 | 443<br>9 | 5127 | 569<br>2 |  |
| cb8564_c75977/flp0/2165  | gnl BL_ORD_ID 13003 cb8564_c161530/flp7/3594<br>isoform=cb8564_c161530;full_length_coverage=1;non_full_length_coverage=7;isoform_length=3594;expected_accuracy=0.999 | 1   | 1393 | 1394 | 2125 | 183  | 157<br>5 | 2863 | 359<br>4 |  |
| cb8564_c113778/flp0/2109 | gnl BL_ORD_ID 12568 cb8564_c123971/f3p1/2902<br>isoform=cb8564_c113778;full_length_coverage=1;non_full_length_coverage=0;isoform_length=2109;expected_accuracy=0.997 | 1   | 1144 | 1141 | 2109 | 19   | 1160     | 1776 | 274<br>4 |  |
| cb1333_c60/flp0/1953     | gnl BL_ORD_ID 61248 cb1333_c59/flp0/2058<br>isoform=cb1333_c60;full_length_coverage=1;non_full_length_coverage=0;isoform_length=1953;expected_accuracy=0.999         | 277 | 1951 | 6    | 280  | 389  | 206<br>5 | 1    | 275      |  |
| cb3892_c10/flp0/2868     | gnl BL_ORD_ID 40678 cb3892_c5/flp0/3003                                                                                                                              | 183 | 2832 | 1    | 184  | 335  | 300      | 1    | 186      |  |

|                                                                                                                      |                                                                                                                 |                          |      |      |      |      |      |      |      |      |
|----------------------------------------------------------------------------------------------------------------------|-----------------------------------------------------------------------------------------------------------------|--------------------------|------|------|------|------|------|------|------|------|
|                                                                                                                      | isoform=cb3892_c5;full_length_coverage=1;non_full_length_coverage=0;isoform_length=3003;expected_accuracy=0.998 |                          |      |      |      |      |      |      |      | 3    |
| cb541_c24/f1p0/5418                                                                                                  | gnl BL_ORD_ID 44619                                                                                             | cb541_c22/f1p0/5566      |      |      |      |      |      |      |      |      |
| isoform=cb541_c24;full_length_coverage=1;non_full_length_coverage=0;isoform_length=5418;expected_accuracy=0.993      | isoform=cb541_c22;full_length_coverage=1;non_full_length_coverage=0;isoform_length=5566;expected_accuracy=0.998 | 1                        | 4102 | 4103 | 5416 | 1    | 4097 | 4227 | 5549 |      |
| cb8564_c46939/f1p1/2926                                                                                              | gnl BL_ORD_ID 55600                                                                                             | cb8564_c46484/f1p0/3151  | 102  | 2134 | 2130 | 2870 | 56   | 2066 | 2171 | 2911 |
| cb653_c12/f1p0/3754                                                                                                  | gnl BL_ORD_ID 49384                                                                                             | cb653_c26/f1p0/4462      | 195  | 3754 | 1    | 196  | 607  | 4166 | 109  | 308  |
| isoform=cb653_c12;full_length_coverage=1;non_full_length_coverage=0;isoform_length=3754;expected_accuracy=0.995      |                                                                                                                 |                          |      |      |      |      |      |      |      |      |
| cb3290_c38/f1p0/2345                                                                                                 | gnl BL_ORD_ID 71043                                                                                             | cb3290_c170/f1p0/3059    | 1150 | 2345 | 1    | 1151 | 1624 | 2828 | 317  | 1467 |
| isoform=cb3290_c38;full_length_coverage=1;non_full_length_coverage=0;isoform_length=2345;expected_accuracy=0.996     |                                                                                                                 |                          |      |      |      |      |      |      |      |      |
| cb11854_c49/f1p0/1279                                                                                                | gnl BL_ORD_ID 12162                                                                                             | cb8564_c146678/f2p5/2093 | 349  | 1253 | 37   | 350  | 1144 | 2048 | 1    | 314  |
| isoform=cb8564_c146678;full_length_coverage=2;non_full_length_coverage=5;isoform_length=2093;expected_accuracy=0.997 |                                                                                                                 |                          |      |      |      |      |      |      |      |      |
| cb7642_c53/f1p0/1947                                                                                                 | gnl BL_ORD_ID 51434                                                                                             | cb7642_c126/f1p0/2123    | 10   | 1181 | 1178 | 1880 | 27   | 1199 | 1306 | 2009 |
| isoform=cb7642_c53;full_length_coverage=1;non_full_length_coverage=0;isoform_length=1947;expected_accuracy=0.990     |                                                                                                                 |                          |      |      |      |      |      |      |      |      |
| cb4469_c6/f1p0/2503                                                                                                  | gnl BL_ORD_ID 44064                                                                                             | cb4469_c10/f1p0/2911     | 1    | 1835 | 1834 | 2470 | 70   | 189  | 2275 | 2911 |



|                                                                                                                  |                                                                                                                                                                      |     |      |      |      |     |      |      |     |   |
|------------------------------------------------------------------------------------------------------------------|----------------------------------------------------------------------------------------------------------------------------------------------------------------------|-----|------|------|------|-----|------|------|-----|---|
|                                                                                                                  | isoform=cb4469_c10;full_length_coverage=1;non_full_length_coverage=0;isoform_length=2911;expected_accuracy=0.994                                                     |     |      |      |      |     |      | 7    |     |   |
| cb14996_c0/f1p0/1746                                                                                             | gnl BL_ORD_ID 74572 cb5896_c102/f1p0/2978                                                                                                                            | 1   | 1118 | 1117 | 1757 | 26  | 1143 | 1714 | 235 | 3 |
| cb8564_c117926/f1p0/2540                                                                                         | gnl BL_ORD_ID 10765 cb8564_c108620/f6p2/2639<br>isoform=cb8564_c108620;full_length_coverage=6;non_full_length_coverage=2;isoform_length=2639;expected_accuracy=1.000 | 17  | 1943 | 1941 | 2330 | 143 | 206  | 2254 | 263 | 9 |
| cb8564_c180116/f1p0/2944                                                                                         | isoform=cb8564_c180116;full_length_coverage=1;non_full_length_coverage=0;isoform_length=2944;expected_accuracy=0.996                                                 |     |      |      |      |     |      |      |     |   |
|                                                                                                                  | gnl BL_ORD_ID 54747 cb8564_c162728/f1p28/3382                                                                                                                        | 1   | 2522 | 2520 | 2944 | 168 | 268  | 2918 | 334 | 2 |
| cb4656_c12/f1p0/1533                                                                                             | gnl BL_ORD_ID 41822 cb4656_c6/f1p0/1966                                                                                                                              |     |      |      |      |     |      |      |     |   |
| isoform=cb4656_c12;full_length_coverage=1;non_full_length_coverage=0;isoform_length=1533;expected_accuracy=0.999 | isoform=cb4656_c6;full_length_coverage=1;non_full_length_coverage=0;isoform_length=1966;expected_accuracy=0.990                                                      | 122 | 1533 | 1    | 121  | 288 | 168  | 23   | 143 |   |
| cb8564_c68629/f9p0/2229                                                                                          | isoform=cb8564_c68629;full_length_coverage=9;non_full_length_coverage=0;isoform_length=2229;expected_accuracy=1.000                                                  |     |      |      |      |     |      |      |     |   |
|                                                                                                                  | gnl BL_ORD_ID 58043 cb8564_c87344/f1p0/2474                                                                                                                          | 11  | 1383 | 1382 | 2210 | 17  | 138  | 1567 | 239 | 4 |
| cb14220_c21/f1p1/5537                                                                                            | gnl BL_ORD_ID 25173 cb14220_c18/f1p1/6379                                                                                                                            |     |      |      |      |     |      |      |     |   |
|                                                                                                                  | isoform=cb14220_c18;full_length_coverage=1;non_full_length_coverage=1;isoform_length=6379;expected_accuracy=0.992                                                    | 1   | 4570 | 4569 | 5549 | 708 | 525  | 5373 | 636 | 6 |
| cb8456_c128/f1p1/1805                                                                                            | gnl BL_ORD_ID 51952 cb8456_c77/f1p0/2298                                                                                                                             | 12  | 1371 | 1366 | 1805 | 23  | 136  | 1484 | 192 |   |

|                                                                                                                   |                                                                                                                                                                         |     |      |      |      |      |      |      |      |
|-------------------------------------------------------------------------------------------------------------------|-------------------------------------------------------------------------------------------------------------------------------------------------------------------------|-----|------|------|------|------|------|------|------|
| isoform=cb8456_c128;full_length_coverage=1;non_full_length_coverage=1;isoform_length=1805;expected_accuracy=0.994 |                                                                                                                                                                         |     |      |      |      |      |      | 9    | 1    |
| cb8564_c15653/f1p4/2475                                                                                           | gnl BL_ORD_ID 15068      cb8564_c46958/f1p6/2685<br>isoform=cb8564_c46958;full_length_coverage=1;non_full_length_coverage=6;isoform_length=2685;expected_accuracy=0.990 | 22  | 2293 | 2289 | 2446 | 48   | 2311 | 2530 | 2685 |
| cb8564_c46939/f1p1/2926                                                                                           | gnl BL_ORD_ID 55623      cb8564_c47027/f1p0/3544                                                                                                                        | 1   | 2134 | 2130 | 2870 | 1    | 2168 | 2273 | 3014 |
| cb9442_c3/f3p1/1845                                                                                               | gnl BL_ORD_ID 59723      cb9442_c8/f1p1/2068<br>isoform=cb9442_c3;full_length_coverage=3;non_full_length_coverage=1;isoform_length=1845;expected_accuracy=1.000         | 1   | 1450 | 1448 | 1842 | 7    | 1456 | 1668 | 2044 |
| cb4444_c18/f1p0/2708                                                                                              | gnl BL_ORD_ID 43662      cb4444_c7/f1p0/2681<br>isoform=cb4444_c7;full_length_coverage=1;non_full_length_coverage=0;isoform_length=2681;expected_accuracy=0.993         | 1   | 1632 | 1630 | 2399 | 1    | 1632 | 1779 | 2573 |
| cb2177_c32/f1p0/2567                                                                                              | gnl BL_ORD_ID 34628      cb2177_c160/f4p2/3130<br>isoform=cb2177_c32;full_length_coverage=1;non_full_length_coverage=0;isoform_length=2567;expected_accuracy=0.990      | 1   | 1568 | 1567 | 2567 | 377  | 1950 | 2125 | 3126 |
| cb2834_c14/f1p0/3411                                                                                              | gnl BL_ORD_ID 68923      cb2834_c8/f1p2/3513                                                                                                                            | 263 | 3380 | 1    | 263  | 406  | 3523 | 41   | 303  |
| cb9270_c3/f1p0/2645                                                                                               | gnl BL_ORD_ID 66349      cb1683_c33/f1p0/2889                                                                                                                           | 632 | 2536 | 85   | 633  | 1956 | 53   | 2767 | 2219 |
| cb3088_c6/f1p0/2002                                                                                               | gnl BL_ORD_ID 37966      cb3088_c4/f1p0/3723                                                                                                                            | 262 | 1981 | 3    | 266  | 1949 | 367  | 28   | 294  |

|                          |                                                                                                                                                                         |     |      |      |      |     |      |      |      |  |  |
|--------------------------|-------------------------------------------------------------------------------------------------------------------------------------------------------------------------|-----|------|------|------|-----|------|------|------|--|--|
|                          | isoform=cb3088_c4;full_length_coverage=1;non_full_length_coverage=0;isoform_length=3723;expected_accuracy=0.997                                                         |     |      |      |      |     |      |      | 4    |  |  |
| cb8564_c21439/f1p0/2587  | gnl BL_ORD_ID 13686      cb8564_c23425/f1p0/2742<br>isoform=cb8564_c23425;full_length_coverage=1;non_full_length_coverage=0;isoform_length=2742;expected_accuracy=0.993 | 1   | 1228 | 1226 | 2572 | 30  | 1258 | 1378 | 2695 |  |  |
| cb6518_c3/f2p0/3835      | gnl BL_ORD_ID 5046      cb6518_c8/f1p0/3970<br>isoform=cb6518_c8;full_length_coverage=1;non_full_length_coverage=0;isoform_length=3970;expected_accuracy=0.991          | 551 | 3822 | 8    | 554  | 714 | 3970 | 1    | 548  |  |  |
| cb3046_c0/f6p0/2414      | gnl BL_ORD_ID 69072      cb3046_c5/f1p0/3275<br>isoform=cb3046_c0;full_length_coverage=6;non_full_length_coverage=0;isoform_length=2414;expected_accuracy=1.000         | 15  | 1900 | 1898 | 2414 | 1   | 1896 | 2305 | 2822 |  |  |
| cb8564_c47011/f1p0/3100  | gnl BL_ORD_ID 14539      cb8564_c46562/f2p3/3196<br>isoform=cb8564_c46562;full_length_coverage=2;non_full_length_coverage=3;isoform_length=3196;expected_accuracy=0.995 | 2   | 2306 | 2301 | 2934 | 6   | 2322 | 2560 | 3192 |  |  |
| cb8564_c47929/f1p0/3443  | gnl BL_ORD_ID 56663      cb8564_c51593/f1p0/4707<br>isoform=cb8564_c47929;full_length_coverage=1;non_full_length_coverage=0;isoform_length=3443;expected_accuracy=0.992 | 1   | 1893 | 1889 | 3442 | 156 | 2043 | 3138 | 4691 |  |  |
| cb8564_c109865/f1p2/1924 | gnl BL_ORD_ID 55214      cb8564_c35600/f1p0/2363<br>isoform=cb8564_c109865;full_length_coverage=1;non_full_length_coverage=2;isoform_length=1924;expected               | 1   | 1802 | 1798 | 1907 | 104 | 1902 | 2140 | 2245 |  |  |

|                          |                                                                                                                                                                         |     |      |      |      |     |      |      |      |
|--------------------------|-------------------------------------------------------------------------------------------------------------------------------------------------------------------------|-----|------|------|------|-----|------|------|------|
| _accuracy=0.994          |                                                                                                                                                                         |     |      |      |      |     |      |      |      |
| cb8564_c36520/f1p0/3415  | gnl BL_ORD_ID 13363      cb8564_c20575/f1p0/3783<br>isoform=cb8564_c20575;full_length_coverage=1;non_full_length_coverage=0;isoform_length=3783;expected_accuracy=0.997 | 22  | 3004 | 3002 | 3404 | 32  | 3004 | 3305 | 3707 |
| cb5183_c115/f1p0/1016    | gnl BL_ORD_ID 73600      cb5183_c53/f1p1/1789                                                                                                                           | 326 | 1016 | 4    | 330  | 981 | 1672 | 46   | 372  |
| cb8564_c81926/f1p2/3307  | gnl BL_ORD_ID 18317      cb8564_c80643/f1p1/3548<br>isoform=cb8564_c81926;full_length_coverage=1;non_full_length_coverage=2;isoform_length=3307;expected_accuracy=0.994 | 1   | 2264 | 2264 | 3292 | 1   | 2251 | 2509 | 3548 |
| cb5183_c62/f1p0/1693     | gnl BL_ORD_ID 46058      cb5183_c19/f1p0/3158<br>isoform=cb5183_c19;full_length_coverage=1;non_full_length_coverage=0;isoform_length=3158;expected_accuracy=0.993       | 1   | 1188 | 1186 | 1668 | 1   | 1184 | 2118 | 2598 |
| cb8564_c40764/f1p0/2563  | gnl BL_ORD_ID 15994      cb8564_c54019/f1p1/2940<br>isoform=cb8564_c40764;full_length_coverage=1;non_full_length_coverage=0;isoform_length=2563;expected_accuracy=0.997 | 1   | 2167 | 2162 | 2563 | 7   | 2154 | 2358 | 2757 |
| cb2033_c2/f2p0/3608      | gnl BL_ORD_ID 66632      cb2033_c12/f1p0/3978<br>isoform=cb2033_c2;full_length_coverage=2;non_full_length_coverage=0;isoform_length=3608;expected_accuracy=1.000        | 1   | 1953 | 1952 | 3575 | 73  | 2024 | 2299 | 3921 |
| cb1030_c25/f1p0/3189     | gnl BL_ORD_ID 47255      cb1030_c32/f1p0/3185                                                                                                                           | 11  | 1795 | 1793 | 2836 | 83  | 1866 | 2020 | 3062 |
| cb8564_c185920/f1p0/2777 | gnl BL_ORD_ID 54438      cb8564_c46124/f1p0/3383                                                                                                                        | 174 | 2777 | 1    | 177  | 501 | 310  | 165  | 342  |

|                                                                                                                      |                                                                                                                     |     |      |      |      |      |      |      |     |   |
|----------------------------------------------------------------------------------------------------------------------|---------------------------------------------------------------------------------------------------------------------|-----|------|------|------|------|------|------|-----|---|
| isoform=cb8564_c185920;full_length_coverage=1;non_full_length_coverage=0;isoform_length=2777;expected_accuracy=0.996 |                                                                                                                     |     |      |      |      |      |      |      |     | 8 |
| cb12572_c11/f1p0/1421                                                                                                | gnl BL_ORD_ID 73926 cb5440_c4/f1p0/3106                                                                             | 1   | 1109 | 1113 | 1405 | 17   | 1125 | 1913 | 220 | 5 |
| cb8564_c10952/f1p1/2673                                                                                              |                                                                                                                     |     |      |      |      |      |      |      |     |   |
| isoform=cb8564_c10952;full_length_coverage=1;non_full_length_coverage=1;isoform_length=2673;expected_accuracy=0.992  | gnl BL_ORD_ID 56381 cb8564_c75626/f1p2/3199                                                                         | 2   | 2122 | 2120 | 2671 | 4    | 2116 | 2611 | 315 | 5 |
| cb8564_c36056/f1p0/2652                                                                                              |                                                                                                                     |     |      |      |      |      |      |      |     |   |
| isoform=cb8564_c36056;full_length_coverage=1;non_full_length_coverage=0;isoform_length=2652;expected_accuracy=0.999  | gnl BL_ORD_ID 55378 cb8564_c39827/f1p1/2907                                                                         | 248 | 2650 | 1    | 251  | 481  | 2879 | 88   | 337 |   |
|                                                                                                                      | gnl BL_ORD_ID 38640 cb295_c2/f4p5/2058                                                                              |     |      |      |      |      |      |      |     |   |
| cb295_c26/f1p1/1869                                                                                                  | isoform=cb295_c2;full_length_coverage=4;non_full_length_coverage=5;isoform_length=2058;expected_accuracy=1.000      | 1   | 1359 | 1358 | 1856 | 77   | 1425 | 1556 | 205 | 8 |
| cb6040_c11/f1p0/2095                                                                                                 | gnl BL_ORD_ID 74811 cb6040_c7/f1p1/2549                                                                             | 1   | 1752 | 1747 | 1943 | 66   | 1816 | 2039 | 223 | 8 |
| cb12_c11/f1p2/4713                                                                                                   | gnl BL_ORD_ID 61090 cb12_c56/f1p0/6478                                                                              | 375 | 4671 | 2    | 378  | 1999 | 6295 | 1377 | 175 | 3 |
| cb8564_c23016/f1p1/2528                                                                                              | gnl BL_ORD_ID 13981 cb8564_c23567/f1p2/3305                                                                         |     |      |      |      |      |      |      |     |   |
| isoform=cb8564_c23016;full_length_coverage=1;non_full_length_coverage=1;isoform_length=2528;expected_accuracy=1.000  | isoform=cb8564_c23567;full_length_coverage=1;non_full_length_coverage=2;isoform_length=3305;expected_accuracy=0.993 | 1   | 2032 | 2031 | 2429 | 639  | 2669 | 2911 | 330 | 5 |
| cb3170_c4/f1p1/2150                                                                                                  | gnl BL_ORD_ID 38754 cb3170_c5/f1p2/2463                                                                             | 1   | 1523 | 1522 | 2070 | 191  | 171  | 1816 | 236 |   |

|                                                                                                                      |                                                                                                                      |     |      |      |      |     |      |      |      |
|----------------------------------------------------------------------------------------------------------------------|----------------------------------------------------------------------------------------------------------------------|-----|------|------|------|-----|------|------|------|
|                                                                                                                      | isoform=cb3170_c5;full_length_coverage=1;non_full_length_coverage=2;isoform_length=2463;expected_accuracy=0.997      |     |      |      |      |     | 3    |      | 4    |
| cb8295_c1/f6p0/1642                                                                                                  | gnl BL_ORD_ID 9587      cb8295_c5/f5p0/2401                                                                          |     |      |      |      |     |      |      |      |
| isoform=cb8295_c1;full_length_coverage=6;non_full_length_coverage=0;isoform_length=1642;expected_accuracy=1.000      | isoform=cb8295_c5;full_length_coverage=5;non_full_length_coverage=0;isoform_length=2401;expected_accuracy=1.000      | 1   | 1207 | 1204 | 1642 | 1   | 1208 | 1961 | 2399 |
| cb8564_c125010/f1p0/1943                                                                                             | gnl BL_ORD_ID 11705      cb8564_c129214/f1p1/2051                                                                    |     |      |      |      |     |      |      |      |
| isoform=cb8564_c125010;full_length_coverage=1;non_full_length_coverage=0;isoform_length=1943;expected_accuracy=0.992 | isoform=cb8564_c129214;full_length_coverage=1;non_full_length_coverage=1;isoform_length=2051;expected_accuracy=0.994 | 1   | 1626 | 1625 | 1943 | 1   | 1630 | 1737 | 2051 |
| cb3426_c24/f1p0/2863                                                                                                 | gnl BL_ORD_ID 39893      cb3426_c18/f1p1/3249                                                                        |     |      |      |      |     |      |      |      |
| isoform=cb3426_c18;full_length_coverage=1;non_full_length_coverage=1;isoform_length=3249;expected_accuracy=0.999     | isoform=cb3426_c18;full_length_coverage=1;non_full_length_coverage=1;isoform_length=3249;expected_accuracy=0.999     | 15  | 2361 | 2358 | 2848 | 48  | 2397 | 2605 | 3094 |
| cb8564_c86614/f1p2/3276                                                                                              | gnl BL_ORD_ID 14738      cb8564_c42029/f1p0/3342                                                                     |     |      |      |      |     |      |      |      |
| isoform=cb8564_c42029;full_length_coverage=1;non_full_length_coverage=0;isoform_length=3342;expected_accuracy=0.998  | isoform=cb8564_c42029;full_length_coverage=1;non_full_length_coverage=0;isoform_length=3342;expected_accuracy=0.998  | 101 | 3169 | 1    | 103  | 270 | 3342 | 19   | 122  |
| cb3270_c8/f1p0/2363                                                                                                  | gnl BL_ORD_ID 71019      cb3270_c22/f1p2/3080                                                                        |     |      |      |      |     |      |      |      |
| isoform=cb3270_c8;full_length_coverage=1;non_full_length_coverage=0;isoform_length=2363;expected_accuracy=0.994      | isoform=cb3270_c22;full_length_coverage=1;non_full_length_coverage=0;isoform_length=3080;expected_accuracy=0.994     | 1   | 1624 | 1620 | 2353 | 4   | 1628 | 2325 | 3058 |
| cb12893_c39/f1p0/1097                                                                                                | gnl BL_ORD_ID 26294      cb12893_c37/f1p0/1237                                                                       |     |      |      |      |     |      |      |      |
| isoform=cb12893_c39;full_length_coverage=1;non_full_length_coverage=0;isoform_length=1097;expected_accuracy=0.994    | isoform=cb12893_c37;full_length_coverage=1;non_full_length_coverage=0;isoform_length=1237;expected_accuracy=0.994    | 239 | 1096 | 4    | 239  | 379 | 1237 | 1    | 236  |

|                                                                                                                                                         |                                                                                                                                                                                               |     |      |      |      |      |      |      |      |
|---------------------------------------------------------------------------------------------------------------------------------------------------------|-----------------------------------------------------------------------------------------------------------------------------------------------------------------------------------------------|-----|------|------|------|------|------|------|------|
| uracy=0.996<br>cb15516_c2/f1p0/1333<br>isoform=cb15516_c2;full_length_coverage=1;non_full_length_coverage=0;isoform_length=1333;expected_accuracy=0.994 | uracy=0.998<br>gnl BL_ORD_ID 3778                      cb6371_c5/f1p0/2342<br>isoform=cb6371_c5;full_length_coverage=1;non_full_length_coverage=0;isoform_length=2342;expected_accuracy=0.995 | 193 | 1333 | 36   | 192  | 1189 | 2328 | 1    | 157  |
| cb14044_c17/f1p0/1065                                                                                                                                   | gnl BL_ORD_ID 25840                      cb14044_c2/f4p1/1883<br>isoform=cb14044_c2;full_length_coverage=4;non_full_length_coverage=1;isoform_length=1883;expected_accuracy=1.000             | 1   | 723  | 719  | 972  | 307  | 1030 | 1164 | 1417 |
| cb8564_c145947/f8p2/2415<br>isoform=cb8564_c145947;full_length_coverage=8;non_full_length_coverage=2;isoform_length=2415;expected_accuracy=1.000        | gnl BL_ORD_ID 12956                      cb8564_c1771/f3p1/3767<br>isoform=cb8564_c1771;full_length_coverage=3;non_full_length_coverage=1;isoform_length=3767;expected_accuracy=0.996         | 1   | 1291 | 1289 | 2415 | 26   | 1334 | 2646 | 3767 |
| cb5874_c30/f1p0/2210                                                                                                                                    | gnl BL_ORD_ID 74537                      cb5874_c33/f1p0/2945                                                                                                                                 | 145 | 2094 | 1    | 145  | 902  | 2851 | 560  | 704  |
| cb14664_c3/f1p0/1551<br>isoform=cb14664_c3;full_length_coverage=1;non_full_length_coverage=0;isoform_length=1551;expected_accuracy=1.000                | gnl BL_ORD_ID 13432                      cb8564_c1994/f1p0/2024<br>isoform=cb8564_c1994;full_length_coverage=1;non_full_length_coverage=0;isoform_length=2024;expected_accuracy=0.995         | 162 | 1536 | 2    | 167  | 645  | 2024 | 1    | 167  |
| cb285_c15/f1p1/2293<br>isoform=cb285_c15;full_length_coverage=1;non_full_length_coverage=1;isoform_length=2293;expected_accuracy=0.998                  | gnl BL_ORD_ID 36788                      cb285_c0/f3p1/2363<br>isoform=cb285_c0;full_length_coverage=3;non_full_length_coverage=1;isoform_length=2363;expected_accuracy=0.997                 | 336 | 2292 | 93   | 337  | 410  | 2363 | 2    | 273  |
| cb7521_c46/f1p0/2168                                                                                                                                    | gnl BL_ORD_ID 8395                      cb7521_c70/f1p3/2481<br>isoform=cb7521_c70;full_length_coverage=1;non_full_length_coverage=3;isoform_length=2481;expected_accuracy=0.998              | 1   | 1630 | 1626 | 2043 | 119  | 1748 | 1949 | 2367 |





|                                                                                                                      |                     |                                                                                                            |     |      |      |      |     |      |      |      |  |
|----------------------------------------------------------------------------------------------------------------------|---------------------|------------------------------------------------------------------------------------------------------------|-----|------|------|------|-----|------|------|------|--|
| cb3593_c2/f1p0/2887                                                                                                  |                     |                                                                                                            |     |      |      |      |     |      | 7    |      |  |
| isoform=cb3593_c2;full_length_coverage=1;non_full_length_coverage=0;isoform_length=2887;expected_accuracy=0.997      | gnl BL_ORD_ID 71361 | cb3593_c1/f1p0/3600                                                                                        | 10  | 2493 | 2493 | 2856 | 1   | 2483 | 3124 | 3485 |  |
| cb1770_c11/f1p0/3480                                                                                                 | gnl BL_ORD_ID 33844 | cb1770_c9/f1p0/3711                                                                                        |     |      |      |      |     |      |      |      |  |
| isoform=cb1770_c11;full_length_coverage=1;non_full_length_coverage=0;isoform_length=3480;expected_accuracy=0.997     | gnl BL_ORD_ID 33844 | cb1770_c9;full_length_coverage=1;non_full_length_coverage=0;isoform_length=3711;expected_accuracy=0.999    | 1   | 2313 | 2308 | 3480 | 12  | 2326 | 2479 | 3653 |  |
| cb8564_c51661/f1p0/3132                                                                                              | gnl BL_ORD_ID 54719 | cb8564_c159487/f1p6/3403                                                                                   | 1   | 2104 | 2099 | 3077 | 19  | 2122 | 2279 | 3257 |  |
| cb309_c4/f2p2/4112                                                                                                   | gnl BL_ORD_ID 38927 | cb309_c3/f2p2/4443                                                                                         |     |      |      |      |     |      |      |      |  |
| isoform=cb309_c4;full_length_coverage=2;non_full_length_coverage=2;isoform_length=4112;expected_accuracy=0.996       | gnl BL_ORD_ID 38927 | cb309_c3;full_length_coverage=2;non_full_length_coverage=2;isoform_length=4443;expected_accuracy=1.000     | 1   | 3715 | 3716 | 4112 | 22  | 3739 | 4027 | 4424 |  |
| cb10027_c14/f6p0/1589                                                                                                | gnl BL_ORD_ID 2017  | cb10027_c6/f1p0/1792                                                                                       |     |      |      |      |     |      |      |      |  |
| isoform=cb10027_c14;full_length_coverage=6;non_full_length_coverage=0;isoform_length=1589;expected_accuracy=1.000    | gnl BL_ORD_ID 2017  | cb10027_c6;full_length_coverage=1;non_full_length_coverage=0;isoform_length=1792;expected_accuracy=1.000   | 226 | 1579 | 4    | 227  | 439 | 1792 | 1    | 224  |  |
| cb8564_c182028/f1p0/2513                                                                                             |                     |                                                                                                            |     |      |      |      |     |      |      |      |  |
| isoform=cb8564_c182028;full_length_coverage=1;non_full_length_coverage=0;isoform_length=2513;expected_accuracy=0.996 | gnl BL_ORD_ID 57311 | cb8564_c89547/f1p0/2973                                                                                    | 1   | 1971 | 1968 | 2513 | 91  | 2062 | 2206 | 2751 |  |
| cb8564_c4845/f1p0/3094                                                                                               | gnl BL_ORD_ID 16120 | cb8564_c4844/f1p0/4014                                                                                     |     |      |      |      |     |      |      |      |  |
| isoform=cb8564_c4845;full_length_coverage=1;non_full_length_coverage=0;isoform_length=3094;expected_accuracy=0.997   | gnl BL_ORD_ID 16120 | cb8564_c4844;full_length_coverage=1;non_full_length_coverage=0;isoform_length=4014;expected_accuracy=0.997 | 1   | 1933 | 1932 | 3088 | 64  | 1995 | 2858 | 4014 |  |

|                         |                                                                                                                                                                         |      |      |      |      |      |          |      |          |  |  |
|-------------------------|-------------------------------------------------------------------------------------------------------------------------------------------------------------------------|------|------|------|------|------|----------|------|----------|--|--|
| curacy=0.996            | curacy=0.995                                                                                                                                                            |      |      |      |      |      |          |      |          |  |  |
| cb4016_c32/f1p0/1913    | gnl BL_ORD_ID 40531      cb4016_c8/f1p0/2818<br>isoform=cb4016_c8;full_length_coverage=1;non_full_length_coverage=0;isoform_length=2818;expected_accuracy=0.993         | 191  | 1930 | 23   | 194  | 1047 | 278<br>3 | 446  | 619      |  |  |
| cb6143_c0/f2p0/2680     | gnl BL_ORD_ID 45275      cb6143_c4/f1p1/2929<br>isoform=cb6143_c0;full_length_coverage=2;non_full_length_coverage=0;isoform_length=2680;expected_accuracy=0.997         | 1250 | 2679 | 1    | 1251 | 1501 | 292<br>9 | 57   | 130<br>5 |  |  |
| cb822_c6/f2p3/4553      | gnl BL_ORD_ID 6209      cb822_c32/f1p1/5821<br>isoform=cb822_c6;full_length_coverage=2;non_full_length_coverage=3;isoform_length=4553;expected_accuracy=1.000           | 1    | 2792 | 2792 | 4552 | 2    | 280<br>2 | 4060 | 581<br>8 |  |  |
| cb8564_c41756/f1p0/2738 | gnl BL_ORD_ID 14368      cb8564_c34638/f1p0/2817<br>isoform=cb8564_c41756;full_length_coverage=1;non_full_length_coverage=0;isoform_length=2738;expected_accuracy=0.996 | 1    | 2173 | 2170 | 2738 | 1    | 213<br>5 | 2257 | 281<br>7 |  |  |
| cb8564_c73443/f1p0/4382 | gnl BL_ORD_ID 57929      cb8564_c84227/f1p0/4645                                                                                                                        | 2    | 3293 | 3292 | 4343 | 3    | 330<br>9 | 3547 | 461<br>0 |  |  |
| cb6398_c11/f1p0/2579    | gnl BL_ORD_ID 49673      cb6398_c8/f1p0/2747                                                                                                                            | 13   | 1929 | 1924 | 2573 | 1    | 191<br>8 | 2053 | 269<br>7 |  |  |
| cb8564_c14344/f1p0/2533 | gnl BL_ORD_ID 18962      cb8564_c79723/f1p6/3025<br>isoform=cb8564_c14344;full_length_coverage=1;non_full_length_coverage=0;isoform_length=2533;expected_accuracy=0.993 | 148  | 2485 | 1    | 151  | 687  | 302<br>5 | 218  | 368      |  |  |
| cb5613_c29/f1p3/2436    | gnl BL_ORD_ID 44685      cb5613_c26/f1p0/3883                                                                                                                           | 1    | 1845 | 1842 | 2365 | 1    | 184      | 3361 | 388      |  |  |

|                                                                                                                                                 |                                                                                                                                                                                           |     |      |      |      |      |     |      |     |   |
|-------------------------------------------------------------------------------------------------------------------------------------------------|-------------------------------------------------------------------------------------------------------------------------------------------------------------------------------------------|-----|------|------|------|------|-----|------|-----|---|
| isoform=cb5613_c29;full_length_coverage=1;non_full_length_coverage=3;isoform_length=2436;expected_accuracy=1.000<br>cb3771_c16/f1p0/3239        | isoform=cb5613_c26;full_length_coverage=1;non_full_length_coverage=0;isoform_length=3883;expected_accuracy=0.994<br>gnl BL_ORD_ID 40598                      cb3771_c5/f1p0/3508          |     |      |      |      |      |     | 1    |     | 3 |
| isoform=cb3771_c16;full_length_coverage=1;non_full_length_coverage=0;isoform_length=3239;expected_accuracy=0.995<br>cb862_c11/f1p0/3220         | isoform=cb3771_c5;full_length_coverage=1;non_full_length_coverage=0;isoform_length=3508;expected_accuracy=0.993<br>gnl BL_ORD_ID 57578   cb862_c12/f1p0/3756                              | 1   | 2536 | 2536 | 3186 | 192  | 272 | 2859 | 350 | 8 |
| cb134_c0/f5p0/2267                                                                                                                              | gnl BL_ORD_ID 27559                      cb134_c11/f1p0/3255                                                                                                                              | 786 | 3110 | 83   | 785  | 1331 | 365 | 29   | 731 | 5 |
| isoform=cb134_c0;full_length_coverage=5;non_full_length_coverage=0;isoform_length=2267;expected_accuracy=1.000<br>cb8564_c20359/f1p3/3986       | isoform=cb134_c11;full_length_coverage=1;non_full_length_coverage=0;isoform_length=3255;expected_accuracy=0.996<br>gnl BL_ORD_ID 14242                      cb8564_c31910/f18p7/4258      | 1   | 1424 | 1420 | 2265 | 3    | 142 | 2412 | 325 | 5 |
| isoform=cb8564_c20359;full_length_coverage=1;non_full_length_coverage=3;isoform_length=3986;expected_accuracy=0.991<br>cb8564_c138545/f4p0/2007 | isoform=cb8564_c31910;full_length_coverage=18;non_full_length_coverage=7;isoform_length=4258;expected_accuracy=1.000<br>gnl BL_ORD_ID 10349                      cb8564_c110674/f1p0/2425 | 1   | 2550 | 2551 | 3981 | 1    | 257 | 2827 | 425 | 8 |
| isoform=cb8564_c138545;full_length_coverage=4;non_full_length_coverage=0;isoform_length=2007;expected_accuracy=1.000<br>cb6063_c19/f1p1/2514    | isoform=cb8564_c110674;full_length_coverage=1;non_full_length_coverage=0;isoform_length=2425;expected_accuracy=0.996<br>gnl BL_ORD_ID 45456                      cb6063_c27/f3p0/2968     | 1   | 1277 | 1275 | 1925 | 1    | 127 | 1775 | 242 | 5 |
| cb4471_c12/f1p0/2778                                                                                                                            | isoform=cb6063_c27;full_length_coverage=3;non_full_length_coverage=0;isoform_length=2968;expected_accuracy=1.000<br>gnl BL_ORD_ID 42093                      cb4471_c7/f1p0/2973          | 157 | 2432 | 1    | 156  | 693  | 296 | 1    | 153 | 5 |
|                                                                                                                                                 |                                                                                                                                                                                           | 21  | 2300 | 2300 | 2777 | 1    | 228 | 2419 | 289 |   |

|                                                                                                                  |                                                                                                                                                                                         |      |      |      |      |      |      |      |      |   |
|------------------------------------------------------------------------------------------------------------------|-----------------------------------------------------------------------------------------------------------------------------------------------------------------------------------------|------|------|------|------|------|------|------|------|---|
| isoform=cb4471_c12;full_length_coverage=1;non_full_length_coverage=0;isoform_length=2778;expected_accuracy=0.996 | isoform=cb4471_c7;full_length_coverage=1;non_full_length_coverage=0;isoform_length=2973;expected_accuracy=0.998                                                                         |      |      |      |      |      |      | 1    |      | 4 |
| cb13861_c12/f1p0/1585                                                                                            | gnl BL_ORD_ID 26339                      cb13861_c2/f2p0/1709<br>isoform=cb13861_c2;full_length_coverage=2;non_full_length_coverage=0;isoform_length=1709;expected_accuracy=0.996       | 12   | 1237 | 1233 | 1576 | 4    | 1229 | 1366 | 1709 |   |
| cb6111_c12/f2p0/1372                                                                                             | gnl BL_ORD_ID 74915                      cb6111_c17/f1p0/1775<br>isoform=cb6111_c12;full_length_coverage=2;non_full_length_coverage=0;isoform_length=1372;expected_accuracy=0.999       | 162  | 1372 | 54   | 161  | 251  | 1462 | 14   | 120  |   |
| cb8564_c90437/f1p0/2888                                                                                          | gnl BL_ORD_ID 57978                      cb8564_c85833/f1p0/2942<br>isoform=cb8564_c90437;full_length_coverage=1;non_full_length_coverage=0;isoform_length=2888;expected_accuracy=0.995 | 1178 | 2777 | 1    | 1180 | 1354 | 2955 | 1    | 1180 |   |
| cb713_c5/f1p2/3811                                                                                               | gnl BL_ORD_ID 5490                      cb713_c1/f1p1/4666<br>isoform=cb713_c5;full_length_coverage=1;non_full_length_coverage=2;isoform_length=3811;expected_accuracy=0.996            | 128  | 2817 | 2816 | 3811 | 3    | 2681 | 3652 | 4651 |   |
| cb9143_c30/f2p0/2817                                                                                             | gnl BL_ORD_ID 19566                      cb9143_c33/f2p0/3006<br>isoform=cb9143_c30;full_length_coverage=2;non_full_length_coverage=0;isoform_length=2817;expected_accuracy=0.996       | 199  | 2738 | 1    | 203  | 467  | 3006 | 128  | 330  |   |
| cb354_c5/f1p0/4015                                                                                               | gnl BL_ORD_ID 70822                      cb354_c1/f1p0/4589<br>isoform=cb354_c5;full_length_coverage=1;non_full_length_coverage=2;isoform_length=4015;expected_accuracy=0.996           | 244  | 4039 | 114  | 247  | 503  | 4298 | 3    | 136  |   |
| cb17052_c0/f2p0/1426                                                                                             | gnl BL_ORD_ID 31873                      cb17052_c2/f1p0/1584<br>isoform=cb17052_c0;full_length_coverage=1;non_full_length_coverage=2;isoform_length=1426;expected_accuracy=0.996       | 271  | 1423 | 4    | 270  | 433  | 157  | 1    | 264  |   |

|                                                                                                                                             |                                                                                                                                                                                         |      |      |      |      |      |     |      |      |   |
|---------------------------------------------------------------------------------------------------------------------------------------------|-----------------------------------------------------------------------------------------------------------------------------------------------------------------------------------------|------|------|------|------|------|-----|------|------|---|
| isoform=cb17052_c0;full_length_coverage=2;non_full_length_coverage=0;isoform_length=1426;expected_accuracy=0.996<br>cb8564_c89842/f1p0/2302 | isoform=cb17052_c2;full_length_coverage=1;non_full_length_coverage=0;isoform_length=1584;expected_accuracy=0.995                                                                        |      |      |      |      |      |     | 9    |      |   |
| isoform=cb8564_c89842;full_length_coverage=1;non_full_length_coverage=0;isoform_length=2302;expected_accuracy=0.990                         | gnl BL_ORD_ID 57182 cb8564_c85892/f1p0/3297                                                                                                                                             | 1    | 1700 | 1698 | 2302 | 160  | 187 | 2409 | 302  | 1 |
| cb1030_c34/f1p0/2904                                                                                                                        | gnl BL_ORD_ID 1808                      cb1030_c5/f2p0/3347<br>isoform=cb1030_c5;full_length_coverage=2;non_full_length_coverage=0;isoform_length=3347;expected_accuracy=0.997          | 1    | 2740 | 2743 | 2873 | 35   | 277 | 2900 | 302  | 9 |
| cb8564_c188095/f1p0/3177                                                                                                                    | gnl BL_ORD_ID 14950                      cb8564_c44595/f2p0/3305<br>isoform=cb8564_c44595;full_length_coverage=2;non_full_length_coverage=0;isoform_length=3305;expected_accuracy=0.995 | 1143 | 3177 | 1    | 1144 | 1249 | 328 | 1    | 1142 | 5 |
| cb11012_c4/f1p0/1724                                                                                                                        | gnl BL_ORD_ID 1652                      cb11012_c2/f1p0/2546<br>isoform=cb11012_c2;full_length_coverage=1;non_full_length_coverage=0;isoform_length=2546;expected_accuracy=0.999        | 1    | 1356 | 1356 | 1724 | 1    | 135 | 2146 | 251  | 4 |
| cb1913_c44/f1p0/2236                                                                                                                        | gnl BL_ORD_ID 66487 cb1913_c32/f1p0/3800                                                                                                                                                | 1    | 1634 | 1630 | 2236 | 85   | 171 | 1842 | 246  | 1 |
| isoform=cb1913_c44;full_length_coverage=1;non_full_length_coverage=0;isoform_length=2236;expected_accuracy=0.998                            |                                                                                                                                                                                         |      |      |      |      |      |     |      |      |   |
| cb8564_c50697/f1p3/2172                                                                                                                     | gnl BL_ORD_ID 56830 cb8564_c73119/f1p0/2955                                                                                                                                             | 106  | 2126 | 1    | 108  | 811  | 282 | 1    | 106  | 7 |

|                                                                                                                   |                                                                                                                 |      |      |      |      |      |      |      |      |  |
|-------------------------------------------------------------------------------------------------------------------|-----------------------------------------------------------------------------------------------------------------|------|------|------|------|------|------|------|------|--|
| accuracy=0.993                                                                                                    |                                                                                                                 |      |      |      |      |      |      |      |      |  |
| cb17252_c0/f1p0/1799                                                                                              | gnl BL_ORD_ID 56867 cb8564_c74584/f1p0/3264                                                                     | 257  | 1788 | 4    | 258  | 1697 | 3229 | 833  | 1087 |  |
| cb4374_c3/f1p0/2557                                                                                               |                                                                                                                 |      |      |      |      |      |      |      |      |  |
| isoform=cb4374_c3;full_length_coverage=1;non_full_length_coverage=0;isoform_length=2557;expected_accuracy=0.997   | gnl BL_ORD_ID 72518 cb4374_c8/f1p0/2778                                                                         | 1    | 1860 | 1856 | 2557 | 4    | 1809 | 2047 | 2751 |  |
| cb8564_c42130/f1p0/3239                                                                                           | gnl BL_ORD_ID 55342 cb8564_c38940/f1p0/4032                                                                     | 695  | 3162 | 9    | 697  | 1133 | 3580 | 54   | 736  |  |
| cb581_c7/f1p0/2369                                                                                                | gnl BL_ORD_ID 45250 cb581_c5/f1p1/2742                                                                          |      |      |      |      |      |      |      |      |  |
| isoform=cb581_c7;full_length_coverage=1;non_full_length_coverage=0;isoform_length=2369;expected_accuracy=0.990    | isoform=cb581_c5;full_length_coverage=1;non_full_length_coverage=1;isoform_length=2742;expected_accuracy=0.996  | 1    | 1631 | 1627 | 2341 | 270  | 1928 | 2033 | 2741 |  |
| cb7064_c20/f1p0/1347                                                                                              | gnl BL_ORD_ID 50308 cb7064_c16/f1p0/3334                                                                        | 135  | 1338 | 7    | 135  | 1854 | 3042 | 1    | 129  |  |
| cb3744_c16/f1p0/2234                                                                                              | gnl BL_ORD_ID 39704 cb3744_c4/f1p2/3147                                                                         |      |      |      |      |      |      |      |      |  |
|                                                                                                                   | isoform=cb3744_c4;full_length_coverage=1;non_full_length_coverage=2;isoform_length=3147;expected_accuracy=1.000 | 1    | 1429 | 1424 | 1922 | 172  | 1600 | 2566 | 3064 |  |
| cb15140_c13/f1p1/5199                                                                                             |                                                                                                                 |      |      |      |      |      |      |      |      |  |
| isoform=cb15140_c13;full_length_coverage=1;non_full_length_coverage=1;isoform_length=5199;expected_accuracy=0.991 | gnl BL_ORD_ID 64476 cb15140_c10/f1p1/5378                                                                       | 31   | 5053 | 5053 | 5198 | 57   | 5093 | 5204 | 5349 |  |
| cb502_c51/f1p1/2358                                                                                               | gnl BL_ORD_ID 41843 cb502_c10/f2p4/2578                                                                         |      |      |      |      |      |      |      |      |  |
|                                                                                                                   | isoform=cb502_c10;full_length_coverage=2;non_full_length_coverage=4;isoform_length=2578;expected_accuracy=      | 1053 | 2282 | 1    | 1055 | 1164 | 2391 | 7    | 1061 |  |



|                                                                                                                                        |                                                                                                                                                                                       |     |      |      |      |      |      |      |      |
|----------------------------------------------------------------------------------------------------------------------------------------|---------------------------------------------------------------------------------------------------------------------------------------------------------------------------------------|-----|------|------|------|------|------|------|------|
| isoform=cb4296_c2;full_length_coverage=1;non_full_length_coverage=0;isoform_length=2951;expected_accuracy=0.998<br>cb6352_c8/f1p0/2668 | isoform=cb4296_c1;full_length_coverage=1;non_full_length_coverage=0;isoform_length=3294;expected_accuracy=0.995<br>gnl BL_ORD_ID 5177                      cb6352_c13/f1p0/5504       |     |      |      |      |      | 5    |      | 4    |
| isoform=cb6352_c8;full_length_coverage=1;non_full_length_coverage=0;isoform_length=2668;expected_accuracy=0.999                        | isoform=cb6352_c13;full_length_coverage=1;non_full_length_coverage=0;isoform_length=5504;expected_accuracy=0.998<br>gnl BL_ORD_ID 10454                      cb8564_c112288/f2p7/2851 | 1   | 2150 | 2149 | 2632 | 15   | 2159 | 5021 | 5504 |
| cb8564_c5070/f1p0/2861                                                                                                                 | isoform=cb8564_c112288;full_length_coverage=2;non_full_length_coverage=7;isoform_length=2851;expected_accuracy=0.992<br>gnl BL_ORD_ID 40896                      cb4016_c10/f1p0/2636 | 10  | 1660 | 1659 | 2830 | 78   | 1730 | 1623 | 2794 |
| cb4016_c32/f1p0/1913                                                                                                                   | isoform=cb4016_c10;full_length_coverage=1;non_full_length_coverage=0;isoform_length=2636;expected_accuracy=0.992<br>gnl BL_ORD_ID 40767                      cb4128_c10/f3p1/2897     | 191 | 1930 | 25   | 194  | 829  | 2565 | 232  | 402  |
| cb16968_c0/f1p0/1336                                                                                                                   | isoform=cb4128_c10;full_length_coverage=3;non_full_length_coverage=1;isoform_length=2897;expected_accuracy=0.998<br>gnl BL_ORD_ID 36571                      cb2737_c54/f1p0/3029     | 488 | 1258 | 9    | 489  | 2096 | 2875 | 3    | 485  |
| cb2737_c63/f1p2/2799                                                                                                                   | isoform=cb2737_c54;full_length_coverage=1;non_full_length_coverage=0;isoform_length=3029;expected_accuracy=0.995                                                                      | 101 | 1885 | 1886 | 2799 | 216  | 1998 | 2110 | 3023 |
| cb8564_c47011/f1p0/3100                                                                                                                | gnl BL_ORD_ID 55910                      cb8564_c48645/f1p1/3287                                                                                                                      | 14  | 2306 | 2301 | 2875 | 17   | 2300 | 2538 | 3113 |
| cb8564_c181853/f1p0/2119                                                                                                               | gnl BL_ORD_ID 58064                      cb8564_c87929/f1p0/3541                                                                                                                      | 1   | 1339 | 1334 | 2112 | 1    | 134  | 2551 | 332  |



|                                                                                                                      |                                                                                                                     |                         |      |      |      |      |      |      |      |      |
|----------------------------------------------------------------------------------------------------------------------|---------------------------------------------------------------------------------------------------------------------|-------------------------|------|------|------|------|------|------|------|------|
| isoform=cb8564_c181853;full_length_coverage=1;non_full_length_coverage=0;isoform_length=2119;expected_accuracy=0.997 |                                                                                                                     |                         |      |      |      |      |      | 1    |      | 9    |
| cb8564_c181853/f1p0/2119                                                                                             | gnl BL_ORD_ID 14291                                                                                                 | cb8564_c39261/f1p0/3083 |      |      |      |      |      |      |      |      |
| isoform=cb8564_c181853;full_length_coverage=1;non_full_length_coverage=0;isoform_length=2119;expected_accuracy=0.997 | isoform=cb8564_c39261;full_length_coverage=1;non_full_length_coverage=0;isoform_length=3083;expected_accuracy=0.994 |                         | 1    | 1339 | 1334 | 2113 | 1    | 1339 | 2307 | 3083 |
| cb8690_c6/f1p0/1987                                                                                                  | gnl BL_ORD_ID 17410                                                                                                 | cb8690_c2/f1p0/2420     |      |      |      |      |      |      |      |      |
| isoform=cb8690_c6;full_length_coverage=1;non_full_length_coverage=0;isoform_length=1987;expected_accuracy=0.994      | isoform=cb8690_c2;full_length_coverage=1;non_full_length_coverage=0;isoform_length=2420;expected_accuracy=0.995     |                         | 384  | 1987 | 56   | 384  | 620  | 2225 | 1    | 330  |
| cb3744_c16/f1p0/2234                                                                                                 | gnl BL_ORD_ID 71475                                                                                                 | cb3744_c21/f1p2/3189    |      |      |      |      |      |      |      |      |
|                                                                                                                      |                                                                                                                     |                         | 1    | 1429 | 1424 | 1922 | 202  | 1630 | 2596 | 3094 |
| cb1795_c9/f1p1/4313                                                                                                  | gnl BL_ORD_ID 66381                                                                                                 | cb1795_c5/f1p0/4734     |      |      |      |      |      |      |      |      |
|                                                                                                                      |                                                                                                                     |                         | 1303 | 4227 | 1    | 1304 | 1775 | 4698 | 10   | 1312 |
| cb7638_c8/f1p0/1378                                                                                                  | gnl BL_ORD_ID 51424                                                                                                 | cb7638_c4/f1p0/1884     |      |      |      |      |      |      |      |      |
| isoform=cb7638_c8;full_length_coverage=1;non_full_length_coverage=0;isoform_length=1378;expected_accuracy=0.999      |                                                                                                                     |                         | 1    | 1050 | 1049 | 1368 | 45   | 1090 | 1236 | 1556 |
| cb3081_c29/f1p0/3488                                                                                                 | gnl BL_ORD_ID 37158                                                                                                 | cb3081_c15/f1p0/3452    |      |      |      |      |      |      |      |      |
|                                                                                                                      | isoform=cb3081_c15;full_length_coverage=1;non_full_length_coverage=0;isoform_length=3452;expected_accuracy=0.996    |                         | 182  | 3309 | 16   | 184  | 324  | 3452 | 1    | 169  |
| cb5643_c99/f1p2/2746                                                                                                 | gnl BL_ORD_ID 45379                                                                                                 | cb5643_c25/f1p0/3322    |      |      |      |      |      |      |      |      |
|                                                                                                                      | isoform=cb5643_c25;full_length_coverage=1;non_full_length_coverage=0;isoform_length=3322;expected_accuracy=0.996    |                         | 109  | 2632 | 1    | 111  | 799  | 3322 | 1    | 111  |

|                          |                                                                                                                                                                                                |      |      |      |      |      |      |      |      |
|--------------------------|------------------------------------------------------------------------------------------------------------------------------------------------------------------------------------------------|------|------|------|------|------|------|------|------|
| cb4016_c32/f1p0/1913     | acy=0.998<br>gnl BL_ORD_ID 40900                      cb4016_c14/f1p0/2928<br>isoform=cb4016_c14;full_length_coverage=1;non_full_length_coverage=0;isoform_length=2928;expected_accuracy=0.994 | 191  | 1930 | 23   | 194  | 1148 | 2890 | 547  | 719  |
| cb8564_c16258/f3p3/3048  | gnl BL_ORD_ID 13113                      cb8564_c16914/f2p0/3868<br>isoform=cb8564_c16258;full_length_coverage=3;non_full_length_coverage=3;isoform_length=3048;expected_accuracy=1.000        | 1480 | 2983 | 1    | 1482 | 1771 | 3274 | 6    | 1484 |
| cb15452_c2/f1p0/1586     | gnl BL_ORD_ID 64677   cb15452_c1/f1p0/1757                                                                                                                                                     | 305  | 1555 | 5    | 310  | 436  | 1685 | 17   | 311  |
| cb6829_c3/f3p1/2194      | gnl BL_ORD_ID 4297                      cb6829_c1/f6p2/2641<br>isoform=cb6829_c3;full_length_coverage=3;non_full_length_coverage=1;isoform_length=2194;expected_accuracy=1.000                 | 1    | 1832 | 1832 | 2194 | 22   | 1854 | 2278 | 2640 |
| cb173_c34/f1p1/2634      | gnl BL_ORD_ID 63581   cb173_c9/f1p0/4950                                                                                                                                                       | 254  | 2634 | 1    | 254  | 1719 | 4101 | 1    | 255  |
| cb8564_c178999/f1p0/2222 | gnl BL_ORD_ID 14411                      cb8564_c44258/f1p0/3202<br>isoform=cb8564_c178999;full_length_coverage=1;non_full_length_coverage=0;isoform_length=2222;expected_accuracy=0.994       | 10   | 1778 | 1773 | 2211 | 5    | 1791 | 2762 | 3202 |
| cb8279_c0/f5p0/1893      | gnl BL_ORD_ID 51873   cb8279_c11/f1p0/2005                                                                                                                                                     | 568  | 1893 | 67   | 569  | 626  | 1951 | 4    | 506  |

|                                                                                                                     |                                                                                                                      |     |      |      |      |      |     |      |     |  |
|---------------------------------------------------------------------------------------------------------------------|----------------------------------------------------------------------------------------------------------------------|-----|------|------|------|------|-----|------|-----|--|
| acy=0.998                                                                                                           |                                                                                                                      |     |      |      |      |      |     |      |     |  |
| cb8564_c23232/f1p3/2540                                                                                             | gnl BL_ORD_ID 55239 cb8564_c36145/f1p0/2868                                                                          | 16  | 2172 | 2167 | 2518 | 1    | 215 | 2257 | 260 |  |
|                                                                                                                     |                                                                                                                      |     |      |      |      |      | 5   |      | 8   |  |
| cb8564_c90797/f1p0/2864                                                                                             | gnl BL_ORD_ID 53674 cb8564_c152641/f1p6/2794                                                                         | 15  | 2307 | 2308 | 2618 | 25   | 231 | 2444 | 275 |  |
|                                                                                                                     |                                                                                                                      |     |      |      |      |      | 7   |      | 0   |  |
| cb12446_c3/f1p0/1412                                                                                                | gnl BL_ORD_ID 9965 cb8564_c110926/f1p3/2015                                                                          |     |      |      |      |      |     |      |     |  |
| isoform=cb12446_c3;full_length_coverage=1;non_full_length_coverage=0;isoform_length=1412;expected_accuracy=1.000    | isoform=cb8564_c110926;full_length_coverage=1;non_full_length_coverage=3;isoform_length=2015;expected_accuracy=0.994 | 109 | 1412 | 1    | 111  | 596  | 190 | 1    | 111 |  |
|                                                                                                                     |                                                                                                                      |     |      |      |      |      | 0   |      |     |  |
| cb2784_c25/f1p0/1649                                                                                                | gnl BL_ORD_ID 68847 cb2784_c13/f1p0/3301                                                                             | 600 | 1727 | 63   | 602  | 2119 | 324 | 1    | 550 |  |
|                                                                                                                     |                                                                                                                      |     |      |      |      |      | 7   |      |     |  |
| cb8564_c46939/f1p1/2926                                                                                             | gnl BL_ORD_ID 14838 cb8564_c34060/f2p0/3214                                                                          |     |      |      |      |      |     |      |     |  |
|                                                                                                                     | isoform=cb8564_c34060;full_length_coverage=2;non_full_length_coverage=0;isoform_length=3214;expected_accuracy=0.993  | 1   | 2134 | 2130 | 2870 | 6    | 218 | 2290 | 303 |  |
|                                                                                                                     |                                                                                                                      |     |      |      |      |      | 5   |      | 1   |  |
| cb8564_c146026/f1p0/2707                                                                                            | gnl BL_ORD_ID 9991 cb8564_c111546/f1p1/2743                                                                          |     |      |      |      |      |     |      |     |  |
|                                                                                                                     | isoform=cb8564_c111546;full_length_coverage=1;non_full_length_coverage=1;isoform_length=2743;expected_accuracy=1.000 | 316 | 2679 | 65   | 316  | 380  | 274 | 1    | 251 |  |
|                                                                                                                     |                                                                                                                      |     |      |      |      |      | 3   |      |     |  |
| cb8564_c91149/f1p5/2619                                                                                             |                                                                                                                      |     |      |      |      |      |     |      |     |  |
| isoform=cb8564_c91149;full_length_coverage=1;non_full_length_coverage=5;isoform_length=2619;expected_accuracy=0.997 | gnl BL_ORD_ID 56353 cb8564_c75114/f1p0/2866                                                                          | 1   | 2044 | 2044 | 2604 | 1    | 203 | 2193 | 273 |  |
|                                                                                                                     |                                                                                                                      |     |      |      |      |      | 5   |      | 7   |  |
| cb134_c5/f1p0/2215                                                                                                  | gnl BL_ORD_ID 27520 cb134_c3/f1p0/2674                                                                               |     |      |      |      |      |     |      |     |  |
| isoform=cb134_c5;full_length_coverage=1;non_full_length_coverage=0;isoform_length=2215;expected_accuracy=0.997      | isoform=cb134_c3;full_length_coverage=1;non_full_length_coverage=0;isoform_length=2674;expected_accuracy=0.997       | 10  | 1099 | 1097 | 2147 | 1    | 108 | 1626 | 267 |  |
|                                                                                                                     |                                                                                                                      |     |      |      |      |      | 9   |      | 4   |  |

|                          |                                                                                                                                                                           |     |      |      |      |      |      |      |      |  |
|--------------------------|---------------------------------------------------------------------------------------------------------------------------------------------------------------------------|-----|------|------|------|------|------|------|------|--|
| y=0.999                  | y=0.995                                                                                                                                                                   |     |      |      |      |      |      |      |      |  |
| cb8564_c41572/f1p1/3265  | gnl BL_ORD_ID 17429      cb8564_c85447/f1p0/3196<br>isoform=cb8564_c85447;full_length_coverage=1;non_full_length_coverage=0;isoform_length=3196;expected_accuracy=0.997   | 1   | 2411 | 2410 | 2949 | 3    | 2413 | 2660 | 3196 |  |
| cb2804_c34/f2p0/2211     | gnl BL_ORD_ID 38910      cb2804_c55/f2p0/3404<br>isoform=cb2804_c34;full_length_coverage=2;non_full_length_coverage=0;isoform_length=2211;expected_accuracy=1.000         | 131 | 2183 | 1    | 133  | 1353 | 3404 | 1    | 132  |  |
| cb8564_c153817/f2p1/2013 | gnl BL_ORD_ID 54738      cb8564_c161787/f1p1/2177<br>isoform=cb8564_c153817;full_length_coverage=2;non_full_length_coverage=1;isoform_length=2013;expected_accuracy=1.000 | 684 | 2010 | 9    | 688  | 814  | 2140 | 6    | 685  |  |
| cb8564_c40598/f1p4/3119  | gnl BL_ORD_ID 16447      cb8564_c47202/f1p0/3195<br>isoform=cb8564_c47202;full_length_coverage=1;non_full_length_coverage=0;isoform_length=3195;expected_accuracy=0.996   | 1   | 2732 | 2729 | 3050 | 1    | 2731 | 2852 | 3195 |  |
| cb4374_c2/f1p0/2590      | gnl BL_ORD_ID 72518      cb4374_c8/f1p0/2778<br>isoform=cb4374_c2;full_length_coverage=1;non_full_length_coverage=0;isoform_length=2590;expected_accuracy=0.994           | 1   | 1844 | 1840 | 2547 | 4    | 1809 | 2047 | 2758 |  |
| cb12_c37/f1p0/4067       | gnl BL_ORD_ID 25418      cb12_c30/f1p2/4443<br>isoform=cb12_c30;full_length_coverage=1;non_full_length_coverage=2;isoform_length=4443;expected_accuracy=0.992             | 286 | 4080 | 186  | 288  | 607  | 4406 | 373  | 476  |  |
| cb9541_c3/f1p0/2530      | gnl BL_ORD_ID 59795      cb9541_c5/f1p0/2731                                                                                                                              | 14  | 2264 | 2262 | 2530 | 7    | 224  | 2361 | 262  |  |

|                                                                                                                      |                                                                                                                      |                          |     |      |      |      |      |      |           |
|----------------------------------------------------------------------------------------------------------------------|----------------------------------------------------------------------------------------------------------------------|--------------------------|-----|------|------|------|------|------|-----------|
| isoform=cb9541_c3;full_length_coverage=1;non_full_length_coverage=0;isoform_length=2530;expected_accuracy=0.999      |                                                                                                                      |                          |     |      |      |      |      | 9    | 8         |
| cb1458_c15/flp0/1854                                                                                                 | gnl BL_ORD_ID 30590                                                                                                  | cb1458_c4/flp1/2072      |     |      |      |      |      |      |           |
| isoform=cb1458_c15;full_length_coverage=1;non_full_length_coverage=0;isoform_length=1854;expected_accuracy=0.997     | isoform=cb1458_c4;full_length_coverage=1;non_full_length_coverage=1;isoform_length=2072;expected_accuracy=0.998      |                          | 502 | 1854 | 63   | 503  | 650  | 2006 | 83 522    |
| cb8564_c15348/flp4/2577                                                                                              | gnl BL_ORD_ID 56353                                                                                                  | cb8564_c75114/flp0/2866  |     |      |      |      |      |      |           |
| isoform=cb8564_c15348;full_length_coverage=1;non_full_length_coverage=4;isoform_length=2577;expected_accuracy=0.997  |                                                                                                                      |                          | 2   | 2007 | 2007 | 2553 | 1    | 2035 | 2193 2737 |
| cb2529_c6/flp0/2581                                                                                                  | gnl BL_ORD_ID 36770                                                                                                  | cb2529_c7/flp0/5178      |     |      |      |      |      |      |           |
|                                                                                                                      | isoform=cb2529_c7;full_length_coverage=1;non_full_length_coverage=0;isoform_length=5178;expected_accuracy=0.993      |                          | 1   | 1714 | 1714 | 2542 | 1576 | 3289 | 4341 5165 |
| cb8564_c113064/flp0/1966                                                                                             | gnl BL_ORD_ID 10268                                                                                                  | cb8564_c111650/flp0/2370 |     |      |      |      |      |      |           |
| isoform=cb8564_c113064;full_length_coverage=1;non_full_length_coverage=0;isoform_length=1966;expected_accuracy=0.997 | isoform=cb8564_c111650;full_length_coverage=1;non_full_length_coverage=0;isoform_length=2370;expected_accuracy=0.997 |                          | 113 | 1966 | 1    | 112  | 485  | 2337 | 122 233   |
| cb5204_c26/flp3/2844                                                                                                 | gnl BL_ORD_ID 46181                                                                                                  | cb5204_c6/flp1/2901      |     |      |      |      |      |      |           |
|                                                                                                                      | isoform=cb5204_c6;full_length_coverage=1;non_full_length_coverage=1;isoform_length=2901;expected_accuracy=0.997      |                          | 1   | 1698 | 1698 | 2735 | 26   | 1739 | 1855 2901 |
| cb10133_c6/flp1/1304                                                                                                 | gnl BL_ORD_ID 48112                                                                                                  | cb10133_c5/flp0/1576     |     |      |      |      |      |      |           |
|                                                                                                                      |                                                                                                                      |                          | 1   | 1074 | 1070 | 1307 | 70   | 1147 | 1271 1508 |
| cb8564_c13234/flp0/3522                                                                                              | gnl BL_ORD_ID 54145                                                                                                  | cb8564_c19339/flp1/3362  |     |      |      |      |      |      |           |
|                                                                                                                      |                                                                                                                      |                          | 18  | 2497 | 2497 | 3238 | 22   | 250  | 2612 335  |

|                                                                                                                      |                                                                                                                      |                                                                                                                     |     |      |      |      |     |      |      |      |
|----------------------------------------------------------------------------------------------------------------------|----------------------------------------------------------------------------------------------------------------------|---------------------------------------------------------------------------------------------------------------------|-----|------|------|------|-----|------|------|------|
|                                                                                                                      |                                                                                                                      |                                                                                                                     |     |      |      |      |     | 1    |      | 3    |
| cb8564_c182592/f1p0/2600                                                                                             |                                                                                                                      |                                                                                                                     |     |      |      |      |     |      |      |      |
| isoform=cb8564_c182592;full_length_coverage=1;non_full_length_coverage=0;isoform_length=2600;expected_accuracy=0.997 | gnl BL_ORD_ID 52859                                                                                                  | cb8564_c110170/f1p0/2703                                                                                            | 102 | 1466 | 1462 | 2586 | 1   | 1386 | 1486 | 2610 |
|                                                                                                                      | gnl BL_ORD_ID 45680                                                                                                  | cb5183_c82/f1p1/1654                                                                                                |     |      |      |      |     |      |      |      |
| cb5183_c115/f1p0/1016                                                                                                | isoform=cb5183_c82;full_length_coverage=1;non_full_length_coverage=1;isoform_length=1654;expected_accuracy=0.994     |                                                                                                                     | 326 | 993  | 1    | 330  | 936 | 1600 | 1    | 328  |
|                                                                                                                      | gnl BL_ORD_ID 21603                                                                                                  | cb8_c5/f1p1/4485                                                                                                    |     |      |      |      |     |      |      |      |
| cb8_c39/f6p2/3811                                                                                                    | isoform=cb8_c39;full_length_coverage=6;non_full_length_coverage=2;isoform_length=3811;expected_accuracy=1.000        | isoform=cb8_c5;full_length_coverage=1;non_full_length_coverage=1;isoform_length=4485;expected_accuracy=0.997        | 102 | 3323 | 3322 | 3807 | 40  | 3262 | 4003 | 4485 |
|                                                                                                                      | gnl BL_ORD_ID 21508                                                                                                  | cb9399_c0/f1p0/2096                                                                                                 |     |      |      |      |     |      |      |      |
| cb9399_c2/f1p0/1800                                                                                                  | isoform=cb9399_c2;full_length_coverage=1;non_full_length_coverage=0;isoform_length=1800;expected_accuracy=0.999      | isoform=cb9399_c0;full_length_coverage=1;non_full_length_coverage=0;isoform_length=2096;expected_accuracy=0.993     | 135 | 1800 | 1    | 134  | 424 | 2086 | 8    | 141  |
|                                                                                                                      | gnl BL_ORD_ID 55537                                                                                                  | cb8564_c44585/f1p0/3901                                                                                             |     |      |      |      |     |      |      |      |
| cb8564_c106911/f7p3/3690                                                                                             | isoform=cb8564_c106911;full_length_coverage=7;non_full_length_coverage=3;isoform_length=3690;expected_accuracy=0.998 |                                                                                                                     | 201 | 3690 | 2    | 203  | 379 | 3844 | 6    | 206  |
|                                                                                                                      | gnl BL_ORD_ID 10800                                                                                                  | cb8564_c10037/f1p5/2946                                                                                             |     |      |      |      |     |      |      |      |
| cb8564_c14344/f1p0/2533                                                                                              | isoform=cb8564_c14344;full_length_coverage=1;non_full_length_coverage=0;isoform_length=2533;expected_accuracy=0.993  | isoform=cb8564_c10037;full_length_coverage=1;non_full_length_coverage=5;isoform_length=2946;expected_accuracy=0.994 | 148 | 2525 | 1    | 151  | 572 | 2946 | 38   | 187  |
|                                                                                                                      | gnl BL_ORD_ID 57694                                                                                                  | cb8564_c78332/f1p0/4781                                                                                             |     |      |      |      |     |      |      |      |
| cb8564_c141653/f3p2/3337                                                                                             |                                                                                                                      |                                                                                                                     | 1   | 2530 | 2528 | 3254 | 9   | 253  | 3635 | 436  |

|                                                                                                                      |                                                                                                                 |     |      |      |      |      |          |      |  |          |
|----------------------------------------------------------------------------------------------------------------------|-----------------------------------------------------------------------------------------------------------------|-----|------|------|------|------|----------|------|--|----------|
|                                                                                                                      |                                                                                                                 |     |      |      |      |      |          | 8    |  | 1        |
| cb14382_c5/f1p0/1401                                                                                                 | gnl BL_ORD_ID 49473 cb793_c3/f1p0/3227                                                                          | 321 | 1351 | 5    | 326  | 2127 | 316<br>3 | 1    |  | 321      |
| cb8564_c180116/f1p0/2944                                                                                             |                                                                                                                 |     |      |      |      |      |          |      |  |          |
| isoform=cb8564_c180116;full_length_coverage=1;non_full_length_coverage=0;isoform_length=2944;expected_accuracy=0.996 | gnl BL_ORD_ID 58037 cb8564_c87188/f1p1/3426                                                                     | 24  | 2522 | 2520 | 2944 | 127  | 262<br>4 | 2853 |  | 327<br>7 |
| cb510_c11/f1p0/3703                                                                                                  | gnl BL_ORD_ID 42975                      cb510_c1/f6p1/3896                                                     |     |      |      |      |      |          |      |  |          |
| isoform=cb510_c11;full_length_coverage=1;non_full_length_coverage=0;isoform_length=3703;expected_accuracy=0.995      | isoform=cb510_c1;full_length_coverage=6;non_full_length_coverage=1;isoform_length=3896;expected_accuracy=1.000  | 1   | 3215 | 3211 | 3661 | 85   | 329<br>8 | 3445 |  | 389<br>6 |
| cb500_c17/f1p0/2323                                                                                                  |                                                                                                                 |     |      |      |      |      |          |      |  |          |
| isoform=cb500_c17;full_length_coverage=1;non_full_length_coverage=0;isoform_length=2323;expected_accuracy=0.997      | gnl BL_ORD_ID 72244 cb500_c41/f1p0/3311                                                                         | 1   | 1293 | 1288 | 2323 | 856  | 214<br>8 | 2280 |  | 331<br>6 |
| cb9201_c7/f1p0/2183                                                                                                  | gnl BL_ORD_ID 19588                      cb9201_c2/f1p0/3381                                                    |     |      |      |      |      |          |      |  |          |
|                                                                                                                      | isoform=cb9201_c2;full_length_coverage=1;non_full_length_coverage=0;isoform_length=3381;expected_accuracy=0.995 | 424 | 2073 | 5    | 424  | 1735 | 338<br>1 | 56   |  | 479      |
| cb8564_c181340/f1p0/2326                                                                                             |                                                                                                                 |     |      |      |      |      |          |      |  |          |
| isoform=cb8564_c181340;full_length_coverage=1;non_full_length_coverage=0;isoform_length=2326;expected_accuracy=0.998 | gnl BL_ORD_ID 54234 cb8564_c20918/f2p2/2484                                                                     | 270 | 2326 | 5    | 270  | 375  | 243<br>1 | 1    |  | 262      |
| cb3771_c16/f1p0/3239                                                                                                 |                                                                                                                 |     |      |      |      |      |          |      |  |          |
| isoform=cb3771_c16;full_length_coverage=1;non_full_length_coverage=0;isoform_length=3239;expected_accuracy=0.999     | gnl BL_ORD_ID 71501 cb3771_c10/f1p0/3494                                                                        | 1   | 2537 | 2536 | 3239 | 88   | 262<br>9 | 2765 |  | 346<br>7 |

|                                                                                                                      |                     |                         |      |      |      |      |      |      |      |      |
|----------------------------------------------------------------------------------------------------------------------|---------------------|-------------------------|------|------|------|------|------|------|------|------|
| racy=0.995                                                                                                           |                     |                         |      |      |      |      |      |      |      |      |
| cb8564_c39756/f1p1/3004                                                                                              | gnl BL_ORD_ID 14410 | cb8564_c44256/f1p1/3267 | 1    | 2125 | 2121 | 2847 | 1    | 2119 | 2553 | 3265 |
| isoform=cb8564_c44256;full_length_coverage=1;non_full_length_coverage=1;isoform_length=3267;expected_accuracy=0.995  |                     |                         |      |      |      |      |      |      |      |      |
| cb8564_c43779/f1p0/3021                                                                                              | gnl BL_ORD_ID 57344 | cb8564_c90538/f1p0/3845 | 1    | 2344 | 2345 | 3021 | 2    | 2346 | 2562 | 3236 |
| isoform=cb8564_c43779;full_length_coverage=1;non_full_length_coverage=0;isoform_length=3021;expected_accuracy=0.993  |                     |                         |      |      |      |      |      |      |      |      |
| cb9867_c3/f1p0/1688                                                                                                  | gnl BL_ORD_ID 20641 | cb9867_c0/f3p0/1916     | 1    | 1050 | 1047 | 1664 | 100  | 1156 | 1292 | 1916 |
| isoform=cb9867_c3;full_length_coverage=1;non_full_length_coverage=0;isoform_length=1688;expected_accuracy=0.993      |                     |                         |      |      |      |      |      |      |      |      |
| cb8564_c178226/f1p0/2728                                                                                             | gnl BL_ORD_ID 56601 | cb8564_c48153/f1p0/3083 | 1284 | 2728 | 1    | 1288 | 1431 | 2877 | 13   | 1327 |
| isoform=cb8564_c178226;full_length_coverage=1;non_full_length_coverage=0;isoform_length=2728;expected_accuracy=0.998 |                     |                         |      |      |      |      |      |      |      |      |
| cb8564_c4731/f1p0/2173                                                                                               | gnl BL_ORD_ID 18228 | cb8564_c912/f2p1/2421   | 443  | 2116 | 7    | 444  | 750  | 2421 | 1    | 440  |
| isoform=cb8564_c912;full_length_coverage=2;non_full_length_coverage=1;isoform_length=2421;expected_accuracy=0.999    |                     |                         |      |      |      |      |      |      |      |      |
| cb15591_c1/f1p1/1413                                                                                                 | gnl BL_ORD_ID 21554 | cb9317_c5/f2p3/1769     | 280  | 1413 | 4    | 284  | 544  | 1680 | 1    | 281  |
| isoform=cb15591_c1;full_length_coverage=1;non_full_length_coverage=1;isoform_length=1413;expected_accuracy=0.999     |                     |                         |      |      |      |      |      |      |      |      |
| cb8564_c161476/f1p4/2801                                                                                             | gnl BL_ORD_ID 17429 | cb8564_c85447/f1p0/3196 | 1    | 2435 | 2434 | 2801 | 3    | 241  | 2660 | 301  |
| isoform=cb8564_c161476;full_length_coverage=1;non_full_length_coverage=1;isoform_length=2801;expected_accuracy=0.999 |                     |                         |      |      |      |      |      |      |      |      |



|                                                                                                                      |                                                                                                                     |      |      |      |      |      |     |      |     |
|----------------------------------------------------------------------------------------------------------------------|---------------------------------------------------------------------------------------------------------------------|------|------|------|------|------|-----|------|-----|
| isoform=cb8564_c161476;full_length_coverage=1;non_full_length_coverage=4;isoform_length=2801;expected_accuracy=0.995 | isoform=cb8564_c85447;full_length_coverage=1;non_full_length_coverage=0;isoform_length=3196;expected_accuracy=0.997 |      |      |      |      |      | 3   |      | 2   |
| cb6719_c45/f1p0/1995                                                                                                 | gnl BL_ORD_ID 49973 cb6719_c29/f1p0/3377                                                                            | 276  | 2004 | 9    | 279  | 1636 | 336 | 1042 | 131 |
| cb8564_c3087/f1p0/2090                                                                                               | gnl BL_ORD_ID 15998 cb8564_c50863/f2p2/2274                                                                         |      |      |      |      |      | 5   |      | 3   |
| isoform=cb8564_c3087;full_length_coverage=1;non_full_length_coverage=0;isoform_length=2090;expected_accuracy=1.000   | isoform=cb8564_c50863;full_length_coverage=2;non_full_length_coverage=2;isoform_length=2274;expected_accuracy=0.995 | 1    | 1914 | 1909 | 2090 | 31   | 195 | 2057 | 223 |
|                                                                                                                      |                                                                                                                     |      |      |      |      |      | 1   |      | 9   |
| cb5538_c31/f1p0/2490                                                                                                 | gnl BL_ORD_ID 45187 cb5538_c6/f1p0/3016                                                                             |      |      |      |      |      |     |      |     |
|                                                                                                                      | isoform=cb5538_c6;full_length_coverage=1;non_full_length_coverage=0;isoform_length=3016;expected_accuracy=0.994     | 1    | 1539 | 1539 | 2327 | 3    | 154 | 2223 | 301 |
|                                                                                                                      |                                                                                                                     |      |      |      |      |      | 0   |      | 3   |
| cb626_c59/f1p0/4159                                                                                                  | gnl BL_ORD_ID 47167 cb626_c79/f1p0/5202                                                                             |      |      |      |      |      |     |      |     |
| isoform=cb626_c59;full_length_coverage=1;non_full_length_coverage=0;isoform_length=4159;expected_accuracy=0.991      |                                                                                                                     | 1642 | 4159 | 11   | 1647 | 2580 | 506 | 114  | 173 |
|                                                                                                                      |                                                                                                                     |      |      |      |      |      | 5   |      | 9   |
| cb8564_c73853/f1p0/2443                                                                                              | gnl BL_ORD_ID 16351 cb8564_c70055/f4p2/2889                                                                         |      |      |      |      |      |     |      |     |
| isoform=cb8564_c73853;full_length_coverage=1;non_full_length_coverage=0;isoform_length=2443;expected_accuracy=1.000  | isoform=cb8564_c70055;full_length_coverage=4;non_full_length_coverage=2;isoform_length=2889;expected_accuracy=1.000 | 1    | 1281 | 1276 | 2443 | 84   | 136 | 1644 | 281 |
|                                                                                                                      |                                                                                                                     |      |      |      |      |      | 4   |      | 6   |
| cb8449_c1/f2p2/2097                                                                                                  | gnl BL_ORD_ID 9574 cb8449_c3/f1p1/2342                                                                              |      |      |      |      |      |     |      |     |
| isoform=cb8449_c1;full_length_coverage=2;non_full_length_coverage=2;isoform_length=2097;expected_accuracy=0.998      | isoform=cb8449_c3;full_length_coverage=1;non_full_length_coverage=1;isoform_length=2342;expected_accuracy=0.997     | 1    | 1780 | 1777 | 2097 | 57   | 184 | 1962 | 228 |
|                                                                                                                      |                                                                                                                     |      |      |      |      |      | 3   |      | 0   |
| cb8564_c16816/f1p2/3599                                                                                              | gnl BL_ORD_ID 69460 cb18782_c1/f1p2/5627                                                                            |      |      |      |      |      |     |      |     |
|                                                                                                                      |                                                                                                                     | 1761 | 3599 | 15   | 1763 | 3814 | 565 | 1    | 175 |

|                                                                                                                     |                                                                                                                                                                         |     |      |      |      |     |      |      |      |
|---------------------------------------------------------------------------------------------------------------------|-------------------------------------------------------------------------------------------------------------------------------------------------------------------------|-----|------|------|------|-----|------|------|------|
| isoform=cb8564_c16816;full_length_coverage=1;non_full_length_coverage=2;isoform_length=3599;expected_accuracy=0.995 |                                                                                                                                                                         |     |      |      |      |     |      | 4    | 2    |
| cb2737_c37/f1p0/2894                                                                                                | gnl BL_ORD_ID 36571      cb2737_c54/f1p0/3029<br>isoform=cb2737_c54;full_length_coverage=1;non_full_length_coverage=0;isoform_length=3029;expected_accuracy=0.995       | 1   | 1867 | 1868 | 2796 | 135 | 1998 | 2110 | 3029 |
| cb8564_c123270/f1p0/1927                                                                                            | gnl BL_ORD_ID 54534      cb8564_c125514/f1p0/2141                                                                                                                       | 244 | 1812 | 55   | 245  | 360 | 1926 | 17   | 204  |
| cb12047_c134/f1p0/1727                                                                                              | gnl BL_ORD_ID 52056      cb8564_c11430/f1p16/1906<br>isoform=cb12047_c134;full_length_coverage=1;non_full_length_coverage=0;isoform_length=1727;expected_accuracy=0.999 | 1   | 1006 | 1001 | 1673 | 51  | 1056 | 1162 | 1834 |
| cb8564_c39355/f1p0/3531                                                                                             | gnl BL_ORD_ID 16775      cb8564_c57586/f4p1/3438<br>isoform=cb8564_c57586;full_length_coverage=4;non_full_length_coverage=1;isoform_length=3438;expected_accuracy=1.000 | 366 | 3215 | 4    | 367  | 605 | 3438 | 75   | 469  |
| cb551_c11/f15p2/2542                                                                                                | gnl BL_ORD_ID 73546      cb551_c13/f1p0/2912<br>isoform=cb551_c11;full_length_coverage=15;non_full_length_coverage=2;isoform_length=2542;expected_accuracy=1.000        | 100 | 1433 | 1431 | 2512 | 2   | 1334 | 1752 | 2833 |
| cb8564_c148132/f3p0/2595                                                                                            | gnl BL_ORD_ID 13987      cb8564_c2882/f1p0/2646<br>isoform=cb8564_c148132;full_length_coverage=3;non_full_length_coverage=0;isoform_length=2595;expected_accuracy=1.000 | 101 | 1498 | 1496 | 2592 | 1   | 1423 | 1548 | 2643 |
| cb3147_c7/f1p0/2346                                                                                                 | gnl BL_ORD_ID 38849      cb3147_c3/f1p0/2291                                                                                                                            | 1   | 1283 | 1281 | 2117 | 31  | 131  | 1457 | 229  |

|                                                                                                                     |                                                                                                                     |      |      |      |      |      |      |      |      |   |
|---------------------------------------------------------------------------------------------------------------------|---------------------------------------------------------------------------------------------------------------------|------|------|------|------|------|------|------|------|---|
|                                                                                                                     | isoform=cb3147_c3;full_length_coverage=1;non_full_length_coverage=0;isoform_length=2291;expected_accuracy=0.993     |      |      |      |      |      |      | 3    |      | 1 |
| cb8564_c53418/f1p0/2602                                                                                             |                                                                                                                     |      |      |      |      |      |      |      |      |   |
| isoform=cb8564_c53418;full_length_coverage=1;non_full_length_coverage=0;isoform_length=2602;expected_accuracy=0.991 | gnl BL_ORD_ID 54329 cb8564_c22496/f4p7/2826                                                                         | 1163 | 2602 | 1    | 1168 | 1269 | 2709 | 1    | 1168 |   |
| cb944_c34/f1p0/3024                                                                                                 | gnl BL_ORD_ID 20927 cb944_c35/f1p0/3736                                                                             |      |      |      |      |      |      |      |      |   |
| isoform=cb944_c34;full_length_coverage=1;non_full_length_coverage=0;isoform_length=3024;expected_accuracy=0.995     | isoform=cb944_c35;full_length_coverage=1;non_full_length_coverage=0;isoform_length=3736;expected_accuracy=0.999     | 1    | 2434 | 2432 | 3024 | 23   | 2462 | 3060 | 3652 |   |
| cb8564_c45775/f1p0/3138                                                                                             | gnl BL_ORD_ID 14649 cb8564_c45118/f2p0/4438                                                                         |      |      |      |      |      |      |      |      |   |
| isoform=cb8564_c45775;full_length_coverage=1;non_full_length_coverage=0;isoform_length=3138;expected_accuracy=0.991 | isoform=cb8564_c45118;full_length_coverage=2;non_full_length_coverage=0;isoform_length=4438;expected_accuracy=1.000 | 1    | 2586 | 2585 | 3059 | 98   | 2702 | 3959 | 4438 |   |
| cb8564_c3239/f1p0/1871                                                                                              | gnl BL_ORD_ID 54874 cb8564_c3238/f1p0/2188                                                                          | 222  | 1809 | 32   | 222  | 507  | 2093 | 22   | 209  |   |
| cb8564_c42409/f1p0/3007                                                                                             | gnl BL_ORD_ID 16879 cb8564_c48606/f1p1/3308                                                                         |      |      |      |      |      |      |      |      |   |
|                                                                                                                     | isoform=cb8564_c48606;full_length_coverage=1;non_full_length_coverage=1;isoform_length=3308;expected_accuracy=0.998 | 107  | 2184 | 2180 | 2899 | 75   | 2151 | 2587 | 3308 |   |
| cb16052_c9/f1p0/1143                                                                                                | gnl BL_ORD_ID 54642 cb8564_c129201/f1p0/1895                                                                        | 151  | 1147 | 34   | 151  | 747  | 1743 | 44   | 161  |   |
| cb8564_c19445/f1p0/3163                                                                                             | gnl BL_ORD_ID 14208 cb8564_c25268/f1p0/3377                                                                         |      |      |      |      |      |      |      |      |   |
| isoform=cb8564_c19445;full_length_coverage=1;non_full_length_coverage=0;isoform_length=3163;expected_accuracy=0.991 | isoform=cb8564_c25268;full_length_coverage=1;non_full_length_coverage=0;isoform_length=3377;expected_accuracy=0.991 | 1    | 2299 | 2298 | 3163 | 1    | 2291 | 2424 | 3285 |   |

|                                                                                                                    |                                                                                                                 |      |      |      |      |      |          |      |          |  |
|--------------------------------------------------------------------------------------------------------------------|-----------------------------------------------------------------------------------------------------------------|------|------|------|------|------|----------|------|----------|--|
| accuracy=0.997                                                                                                     | curacy=0.992                                                                                                    |      |      |      |      |      |          |      |          |  |
| cb6291_c3/f1p0/2781                                                                                                |                                                                                                                 |      |      |      |      |      |          |      |          |  |
| isoform=cb6291_c3;full_length_coverage=1;non_full_length_coverage=0;isoform_length=2781;expected_accuracy=0.992    | gnl BL_ORD_ID 47420 cb6291_c2/f1p0/3168                                                                         | 192  | 2775 | 1    | 191  | 466  | 305<br>5 | 154  | 347      |  |
| cb8564_c53873/f1p0/2658                                                                                            | gnl BL_ORD_ID 54141 cb8564_c19256/f1p0/3854                                                                     | 736  | 2503 | 9    | 737  | 1639 | 340<br>6 | 1    | 734      |  |
| cb8564_c46939/f1p1/2926                                                                                            | gnl BL_ORD_ID 55437 cb8564_c41690/f1p1/3409                                                                     | 1    | 2134 | 2130 | 2870 | 1    | 214<br>8 | 2253 | 299<br>4 |  |
| cb4807_c21/f1p0/3041                                                                                               | gnl BL_ORD_ID 43586 cb4807_c0/f4p0/3303                                                                         |      |      |      |      |      |          |      |          |  |
| isoform=cb4807_c21;full_length_coverage=1;non_full_length_coverage=0;isoform_length=3041;expected_accuracy=0.996   | isoform=cb4807_c0;full_length_coverage=4;non_full_length_coverage=0;isoform_length=3303;expected_accuracy=0.998 | 1146 | 3041 | 1    | 1146 | 1399 | 330<br>3 | 47   | 1192     |  |
| cb1312_c24/f1p0/3018                                                                                               | gnl BL_ORD_ID 61223 cb1312_c8/f1p0/4164                                                                         | 1    | 1532 | 1531 | 2888 | 154  | 168<br>5 | 2417 | 377<br>4 |  |
| cb5103_c24/f4p0/1839                                                                                               |                                                                                                                 |      |      |      |      |      |          |      |          |  |
| isoform=cb5103_c24;full_length_coverage=4;non_full_length_coverage=0;isoform_length=1839;expected_accuracy=1.000   | gnl BL_ORD_ID 72111 cb5103_c7/f1p0/2511                                                                         | 1    | 1518 | 1515 | 1829 | 19   | 153<br>4 | 2045 | 235<br>9 |  |
| cb8564_c2326/f1p0/2006                                                                                             |                                                                                                                 |      |      |      |      |      |          |      |          |  |
| isoform=cb8564_c2326;full_length_coverage=1;non_full_length_coverage=0;isoform_length=2006;expected_accuracy=0.990 | gnl BL_ORD_ID 54764 cb8564_c2424/f1p1/2797                                                                      | 230  | 2006 | 4    | 234  | 844  | 261<br>7 | 133  | 366      |  |
| cb1609_c7/f1p0/1655                                                                                                | gnl BL_ORD_ID 29381 cb1609_c6/f1p0/1785                                                                         |      |      |      |      |      |          |      |          |  |
|                                                                                                                    | isoform=cb1609_c6;full_length_coverage=1;non_full_length_coverage=0;isoform_length=1785;expected_accuracy=0.992 | 1    | 1078 | 1077 | 1658 | 1    | 107<br>7 | 1200 | 178<br>2 |  |

|                                                                                                                      |                                                                                                                      |      |      |      |      |      |      |      |      |  |
|----------------------------------------------------------------------------------------------------------------------|----------------------------------------------------------------------------------------------------------------------|------|------|------|------|------|------|------|------|--|
| cb8564_c145668/f4p0/2444                                                                                             | cy=0.997<br>gnl BL_ORD_ID 15329      cb8564_c33103/f10p0/2526                                                        |      |      |      |      |      |      |      |      |  |
| isoform=cb8564_c145668;full_length_coverage=4;non_full_length_coverage=0;isoform_length=2444;expected_accuracy=1.000 | isoform=cb8564_c33103;full_length_coverage=10;non_full_length_coverage=0;isoform_length=2526;expected_accuracy=1.000 | 1    | 2137 | 2138 | 2427 | 1    | 2137 | 2238 | 2526 |  |
| cb1936_c2/f1p0/2075                                                                                                  | gnl BL_ORD_ID 36181      cb1936_c1/f1p0/3489                                                                         |      |      |      |      |      |      |      |      |  |
| isoform=cb1936_c2;full_length_coverage=1;non_full_length_coverage=0;isoform_length=3489;expected_accuracy=0.993      | isoform=cb1936_c1;full_length_coverage=1;non_full_length_coverage=0;isoform_length=3489;expected_accuracy=0.993      | 276  | 1935 | 44   | 275  | 1804 | 3461 | 1    | 232  |  |
| cb8564_c51780/f1p2/3067                                                                                              | gnl BL_ORD_ID 55821      cb8564_c41766/f1p2/3241                                                                     |      |      |      |      |      |      |      |      |  |
| isoform=cb8564_c51780;full_length_coverage=1;non_full_length_coverage=2;isoform_length=3067;expected_accuracy=0.995  | isoform=cb8564_c41766;full_length_coverage=1;non_full_length_coverage=2;isoform_length=3241;expected_accuracy=0.995  | 1    | 2308 | 2308 | 3067 | 27   | 2334 | 2492 | 3253 |  |
| cb8564_c3899/f1p0/2507                                                                                               | gnl BL_ORD_ID 54953      cb8564_c3898/f1p0/2998                                                                      |      |      |      |      |      |      |      |      |  |
| isoform=cb8564_c3899;full_length_coverage=1;non_full_length_coverage=0;isoform_length=2507;expected_accuracy=0.995   | isoform=cb8564_c3898;full_length_coverage=1;non_full_length_coverage=0;isoform_length=2998;expected_accuracy=0.995   | 1151 | 2429 | 1    | 1152 | 1532 | 2808 | 8    | 1157 |  |
| cb2918_c79/f1p0/2785                                                                                                 | gnl BL_ORD_ID 37245      cb2918_c88/f3p0/3004                                                                        |      |      |      |      |      |      |      |      |  |
| isoform=cb2918_c79;full_length_coverage=1;non_full_length_coverage=0;isoform_length=2785;expected_accuracy=1.000     | isoform=cb2918_c88;full_length_coverage=3;non_full_length_coverage=0;isoform_length=3004;expected_accuracy=1.000     | 1    | 2540 | 2536 | 2782 | 12   | 2548 | 2759 | 3004 |  |
| cb2177_c32/f1p0/2567                                                                                                 | gnl BL_ORD_ID 66791      cb2177_c38/f1p0/3092                                                                        |      |      |      |      |      |      |      |      |  |
| isoform=cb2177_c32;full_length_coverage=1;non_full_length_coverage=0;isoform_length=2567;expected_accuracy=0.990     | isoform=cb2177_c38;full_length_coverage=1;non_full_length_coverage=0;isoform_length=3092;expected_accuracy=0.990     | 1    | 1568 | 1567 | 2546 | 226  | 1808 | 1983 | 2965 |  |
| cb7128_c8/f1p0/1081                                                                                                  | gnl BL_ORD_ID 65370      cb16614_c3/f1p0/1379                                                                        |      |      |      |      |      |      |      |      |  |
| isoform=cb7128_c8;full_length_coverage=1;non_full_length_coverage=0;isoform_length=1081;expected_accuracy=1.000      | isoform=cb16614_c3;full_length_coverage=1;non_full_length_coverage=0;isoform_length=1379;expected_accuracy=1.000     | 125  | 1077 | 2    | 126  | 402  | 135  | 3    | 127  |  |

|                                                                                                                     |                                                                                                                  |                         |     |      |      |      |      |          |      |          |
|---------------------------------------------------------------------------------------------------------------------|------------------------------------------------------------------------------------------------------------------|-------------------------|-----|------|------|------|------|----------|------|----------|
| isoform=cb7128_c8;full_length_coverage=1;non_full_length_coverage=0;isoform_length=1081;expected_accuracy=0.992     |                                                                                                                  |                         |     |      |      |      |      |          | 3    |          |
| cb8564_c42814/f1p0/2151                                                                                             |                                                                                                                  |                         |     |      |      |      |      |          |      |          |
| isoform=cb8564_c42814;full_length_coverage=1;non_full_length_coverage=0;isoform_length=2151;expected_accuracy=0.993 | gnl BL_ORD_ID 56601                                                                                              | cb8564_c48153/f1p0/3083 | 650 | 2151 | 7    | 652  | 1373 | 287<br>7 | 13   | 684      |
| cb11524_c0/f2p1/1126                                                                                                | gnl BL_ORD_ID 23512                                                                                              | cb11524_c1/f1p0/2290    |     |      |      |      |      |          |      |          |
| isoform=cb11524_c0;full_length_coverage=2;non_full_length_coverage=1;isoform_length=1126;expected_accuracy=0.990    | isoform=cb11524_c1;full_length_coverage=1;non_full_length_coverage=0;isoform_length=2290;expected_accuracy=0.998 |                         | 337 | 1126 | 8    | 337  | 1498 | 228<br>9 | 1    | 331      |
| cb10558_c10/f1p0/1635                                                                                               |                                                                                                                  |                         |     |      |      |      |      |          |      |          |
| isoform=cb10558_c10;full_length_coverage=1;non_full_length_coverage=0;isoform_length=1635;expected_accuracy=0.991   | gnl BL_ORD_ID 48654                                                                                              | cb10558_c15/f1p0/1780   | 1   | 1360 | 1361 | 1635 | 7    | 137<br>2 | 1502 | 177<br>3 |
| cb5199_c11/f1p2/2600                                                                                                | gnl BL_ORD_ID 73620                                                                                              | cb5199_c19/f1p2/3067    | 1   | 1891 | 1892 | 2517 | 1    | 190<br>2 | 2461 | 308<br>6 |
| cb8564_c45300/f1p4/3014                                                                                             |                                                                                                                  |                         |     |      |      |      |      |          |      |          |
| isoform=cb8564_c45300;full_length_coverage=1;non_full_length_coverage=4;isoform_length=3014;expected_accuracy=0.996 | gnl BL_ORD_ID 55211                                                                                              | cb8564_c35547/f1p0/3745 | 243 | 3014 | 1    | 246  | 413  | 318<br>2 | 9    | 256      |
| cb3007_c13/f1p0/2385                                                                                                | gnl BL_ORD_ID 37322                                                                                              | cb3007_c12/f1p0/2890    |     |      |      |      |      |          |      |          |
| isoform=cb3007_c12;full_length_coverage=1;non_full_length_coverage=0;isoform_length=2890;expected_accuracy=0.996    | isoform=cb3007_c12;full_length_coverage=1;non_full_length_coverage=0;isoform_length=2890;expected_accuracy=0.996 |                         | 117 | 2345 | 1    | 121  | 666  | 289<br>0 | 1    | 120      |
| cb1368_c2/f1p0/2063                                                                                                 | gnl BL_ORD_ID 61285                                                                                              | cb1368_c0/f1p0/4350     | 1   | 1643 | 1642 | 2034 | 1    | 164      | 1796 | 218      |

|                                                                                                                     |                                                                                                                     |      |      |      |      |      |      |      |      |
|---------------------------------------------------------------------------------------------------------------------|---------------------------------------------------------------------------------------------------------------------|------|------|------|------|------|------|------|------|
| cb6739_c19/f1p1/2409                                                                                                |                                                                                                                     |      |      |      |      |      |      | 5    | 8    |
| isoform=cb6739_c19;full_length_coverage=1;non_full_length_coverage=1;isoform_length=2409;expected_accuracy=0.998    | gnl BL_ORD_ID 50006 cb6739_c17/f1p1/2735                                                                            | 1    | 2070 | 2067 | 2409 | 1    | 2079 | 2202 | 2546 |
| cb2493_c40/f1p0/3431                                                                                                | gnl BL_ORD_ID 69776 cb2493_c46/f1p1/3909                                                                            | 485  | 3408 | 56   | 488  | 775  | 3697 | 24   | 463  |
| cb8564_c10682/f1p0/1913                                                                                             |                                                                                                                     |      |      |      |      |      |      |      |      |
| isoform=cb8564_c10682;full_length_coverage=1;non_full_length_coverage=0;isoform_length=1913;expected_accuracy=0.994 | gnl BL_ORD_ID 55572 cb8564_c45654/f1p0/2343                                                                         | 1    | 1045 | 1041 | 1913 | 42   | 1086 | 1466 | 2338 |
| cb3143_c17/f1p0/2870                                                                                                | gnl BL_ORD_ID 37665 cb3143_c33/f10p3/3441                                                                           |      |      |      |      |      |      |      |      |
| isoform=cb3143_c17;full_length_coverage=1;non_full_length_coverage=0;isoform_length=2870;expected_accuracy=0.993    | isoform=cb3143_c33;full_length_coverage=10;non_full_length_coverage=3;isoform_length=3441;expected_accuracy=1.000   | 160  | 2870 | 1    | 163  | 721  | 3424 | 54   | 212  |
| cb6202_c7/f1p0/1705                                                                                                 |                                                                                                                     |      |      |      |      |      |      |      |      |
| isoform=cb6202_c7;full_length_coverage=1;non_full_length_coverage=0;isoform_length=1705;expected_accuracy=0.998     | gnl BL_ORD_ID 49523 cb6202_c5/f1p0/2275                                                                             | 398  | 1702 | 8    | 403  | 960  | 2243 | 32   | 424  |
| cb8564_c40764/f1p0/2563                                                                                             | gnl BL_ORD_ID 15428 cb8564_c42387/f1p4/2973                                                                         |      |      |      |      |      |      |      |      |
| isoform=cb8564_c40764;full_length_coverage=1;non_full_length_coverage=0;isoform_length=2563;expected_accuracy=0.997 | isoform=cb8564_c42387;full_length_coverage=1;non_full_length_coverage=4;isoform_length=2973;expected_accuracy=0.993 | 1    | 2167 | 2162 | 2563 | 1    | 2169 | 2378 | 2789 |
| cb3602_c15/f1p1/2585                                                                                                | gnl BL_ORD_ID 40604 cb3602_c7/f1p2/2820                                                                             |      |      |      |      |      |      |      |      |
|                                                                                                                     | isoform=cb3602_c7;full_length_coverage=1;non_full_length_coverage=2;isoform_length=2820;expected_accuracy=          | 1137 | 2463 | 1    | 1139 | 1482 | 2812 | 5    | 1149 |

|                         |                                                                                                                                                                            |      |      |      |      |      |          |      |          |
|-------------------------|----------------------------------------------------------------------------------------------------------------------------------------------------------------------------|------|------|------|------|------|----------|------|----------|
| cb6221_c13/flp0/2080    | cy=1.000<br>gnl BL_ORD_ID 4878      cb6221_c8/flp3/4003<br>isoform=cb6221_c8;full_length_coverage=1;non_full_length_coverage=3;isoform_length=4003;expected_accuracy=0.995 | 117  | 2080 | 1    | 117  | 885  | 285<br>1 | 60   | 174      |
| cb5772_c13/flp0/1660    | gnl BL_ORD_ID 46526      cb5772_c11/flp1/1685<br>isoform=cb5772_c11;full_length_coverage=1;non_full_length_coverage=1;isoform_length=1685;expected_accuracy=0.992          | 168  | 1509 | 18   | 170  | 256  | 160<br>6 | 1    | 153      |
| cb3513_c10/flp0/2860    | gnl BL_ORD_ID 40098      cb3513_c6/f2p0/2992<br>isoform=cb3513_c6;full_length_coverage=2;non_full_length_coverage=0;isoform_length=2992;expected_accuracy=0.997            | 1074 | 2808 | 1    | 1076 | 1216 | 295<br>8 | 1    | 107<br>6 |
| cb2677_c13/flp1/3727    | gnl BL_ORD_ID 38453      cb2677_c24/flp0/3934<br>isoform=cb2677_c24;full_length_coverage=1;non_full_length_coverage=0;isoform_length=3934;expected_accuracy=0.992          | 260  | 3727 | 1    | 259  | 426  | 390<br>7 | 1    | 265      |
| cb1626_c17/flp0/3006    | gnl BL_ORD_ID 33068      cb1626_c13/flp0/4596<br>isoform=cb1626_c13;full_length_coverage=1;non_full_length_coverage=0;isoform_length=4596;expected_accuracy=1.000          | 1092 | 2996 | 1    | 1092 | 2692 | 459<br>6 | 1    | 107<br>9 |
| cb8564_c14775/flp1/2535 | gnl BL_ORD_ID 12323      cb8564_c12737/flp1/3352<br>isoform=cb8564_c12737;full_length_coverage=1;non_full_length_coverage=1;isoform_length=3352;expected_accuracy=0.997    | 1056 | 2492 | 1    | 1058 | 1837 | 327<br>2 | 334  | 138<br>7 |
| cb1240_c4/flp1/4081     | gnl BL_ORD_ID 67887      cb18607_c0/flp0/5858                                                                                                                              | 1    | 2657 | 2654 | 4065 | 4    | 266      | 2798 | 422      |



|                                                                                                                 |                     |                          |                                                                                                                      |      |      |      |      |      |          |      |          |
|-----------------------------------------------------------------------------------------------------------------|---------------------|--------------------------|----------------------------------------------------------------------------------------------------------------------|------|------|------|------|------|----------|------|----------|
| isoform=cb1240_c4;full_length_coverage=1;non_full_length_coverage=1;isoform_length=4081;expected_accuracy=0.995 |                     |                          |                                                                                                                      |      |      |      |      | 6    |          | 4    |          |
| cb8564_c130024/f1p0/2150                                                                                        | gnl BL_ORD_ID 12134 | cb8564_c129304/f1p0/2288 | isoform=cb8564_c129304;full_length_coverage=1;non_full_length_coverage=0;isoform_length=2288;expected_accuracy=0.996 | 269  | 2155 | 52   | 270  | 357  | 224<br>4 | 1    | 219      |
| cb11296_c7/f1p1/1597                                                                                            | gnl BL_ORD_ID 23796 | cb11296_c5/f1p1/1722     | isoform=cb11296_c5;full_length_coverage=1;non_full_length_coverage=1;isoform_length=1722;expected_accuracy=1.000     | 593  | 1532 | 7    | 596  | 767  | 170<br>7 | 1    | 590      |
| cb1524_c31/f1p0/3629                                                                                            | gnl BL_ORD_ID 28439 | cb1524_c30/f1p0/3792     | isoform=cb1524_c30;full_length_coverage=1;non_full_length_coverage=0;isoform_length=3792;expected_accuracy=0.994     | 107  | 3628 | 1    | 106  | 256  | 377<br>7 | 51   | 156      |
| cb8564_c44698/f1p5/2843                                                                                         | gnl BL_ORD_ID 12938 | cb8564_c181163/f1p1/2936 | isoform=cb8564_c181163;full_length_coverage=1;non_full_length_coverage=1;isoform_length=2936;expected_accuracy=0.993 | 1    | 2516 | 2511 | 2830 | 5    | 249<br>9 | 2619 | 293<br>6 |
| cb8564_c50697/f1p3/2172                                                                                         | gnl BL_ORD_ID 9497  | cb8564_c107044/f3p8/2832 | isoform=cb8564_c107044;full_length_coverage=3;non_full_length_coverage=8;isoform_length=2832;expected_accuracy=0.998 | 106  | 2142 | 1    | 108  | 796  | 283<br>2 | 72   | 179      |
| cb965_c5/f2p7/4283                                                                                              | gnl BL_ORD_ID 19288 | cb965_c14/f1p0/4481      | isoform=cb965_c14;full_length_coverage=1;non_full_length_coverage=0;isoform_length=4481;expected_accuracy=0.995      | 2059 | 4283 | 2    | 2063 | 2225 | 445<br>9 | 1    | 208<br>3 |

|                                                                                                                                                  |                                                                                                                                                                    |     |      |      |      |     |          |      |          |  |  |
|--------------------------------------------------------------------------------------------------------------------------------------------------|--------------------------------------------------------------------------------------------------------------------------------------------------------------------|-----|------|------|------|-----|----------|------|----------|--|--|
| y=1.000                                                                                                                                          | cy=0.998                                                                                                                                                           |     |      |      |      |     |          |      |          |  |  |
| cb8564_c47011/f1p0/3100                                                                                                                          | gnl BL_ORD_ID 55182 cb8564_c34825/f1p2/3200                                                                                                                        | 13  | 2306 | 2301 | 2934 | 6   | 232<br>1 | 2559 | 318<br>9 |  |  |
| cb1333_c10/f4p0/1937<br>isoform=cb1333_c10;full_length_coverage=4;non_full_length_coverage=0;isoform_length=1937;expected_accuracy=1.000         | gnl BL_ORD_ID 26504 cb1333_c75/f1p0/2099<br>isoform=cb1333_c75;full_length_coverage=1;non_full_length_coverage=0;isoform_length=2099;expected_accuracy=0.998       | 1   | 1095 | 1096 | 1903 | 6   | 1116     | 1292 | 209<br>9 |  |  |
| cb12931_c15/f1p0/1493<br>isoform=cb12931_c15;full_length_coverage=1;non_full_length_coverage=0;isoform_length=1493;expected_accuracy=1.000       | gnl BL_ORD_ID 17161 cb8564_c87466/f1p1/3006<br>isoform=cb8564_c87466;full_length_coverage=1;non_full_length_coverage=1;isoform_length=3006;expected_accuracy=0.994 | 1   | 1106 | 1104 | 1493 | 1   | 1115     | 2502 | 290<br>1 |  |  |
| cb10142_c11/f1p0/1528<br>isoform=cb10142_c11;full_length_coverage=1;non_full_length_coverage=0;isoform_length=1528;expected_accuracy=1.000       | gnl BL_ORD_ID 2501 cb10142_c13/f1p0/1836<br>isoform=cb10142_c13;full_length_coverage=1;non_full_length_coverage=0;isoform_length=1836;expected_accuracy=0.997      | 1   | 1360 | 1358 | 1464 | 5   | 136<br>7 | 1730 | 183<br>6 |  |  |
| cb17118_c7/f1p0/1440                                                                                                                             | gnl BL_ORD_ID 33875 cb17118_c4/f1p0/1886<br>isoform=cb17118_c4;full_length_coverage=1;non_full_length_coverage=0;isoform_length=1886;expected_accuracy=0.995       | 1   | 1141 | 1137 | 1414 | 289 | 142<br>6 | 1610 | 188<br>6 |  |  |
| cb12047_c103/f1p1/1531                                                                                                                           | gnl BL_ORD_ID 52769 cb8564_c13372/f1p15/4378                                                                                                                       | 9   | 870  | 865  | 1520 | 7   | 868      | 1154 | 180<br>9 |  |  |
| cb8564_c133426/f1p2/2797<br>isoform=cb8564_c133426;full_length_coverage=1;non_full_length_coverage=2;isoform_length=2797;expected_accuracy=0.992 | gnl BL_ORD_ID 55047 cb8564_c4680/f1p0/2928                                                                                                                         | 248 | 2696 | 1    | 248  | 374 | 280<br>1 | 3    | 250      |  |  |
| cb8564_c21909/f1p2/3933                                                                                                                          | gnl BL_ORD_ID 52786 cb8564_c13843/f1p0/4329                                                                                                                        | 131 | 3933 | 1    | 130  | 384 | 418      | 31   | 160      |  |  |

|                                                                                                                     |                     |                         |                                                                                                                     |      |      |      |      |      |     |   |      |     |   |
|---------------------------------------------------------------------------------------------------------------------|---------------------|-------------------------|---------------------------------------------------------------------------------------------------------------------|------|------|------|------|------|-----|---|------|-----|---|
| isoform=cb8564_c21909;full_length_coverage=1;non_full_length_coverage=2;isoform_length=3933;expected_accuracy=0.998 |                     |                         |                                                                                                                     |      |      |      |      |      |     | 3 |      |     |   |
| cb765_c15/f1p0/3098                                                                                                 | gnl BL_ORD_ID 7179  | cb765_c2/f1p1/4647      | isoform=cb765_c2;full_length_coverage=1;non_full_length_coverage=1;isoform_length=4647;expected_accuracy=0.997      | 1    | 2374 | 2372 | 2838 | 1522 | 389 | 1 | 4032 | 449 | 8 |
| cb15516_c2/f1p0/1333                                                                                                | gnl BL_ORD_ID 47466 | cb6371_c4/f1p0/2354     | isoform=cb15516_c2;full_length_coverage=1;non_full_length_coverage=0;isoform_length=1333;expected_accuracy=0.994    | 193  | 1333 | 41   | 192  | 1178 | 233 | 0 | 1    | 152 |   |
| cb4972_c32/f1p0/3346                                                                                                | gnl BL_ORD_ID 41907 | cb4972_c52/f1p1/3427    | isoform=cb4972_c32;full_length_coverage=1;non_full_length_coverage=0;isoform_length=3346;expected_accuracy=0.995    | 1647 | 3346 | 126  | 1648 | 1705 | 342 | 1 | 42   | 157 | 5 |
| cb8564_c47713/f1p0/4233                                                                                             | gnl BL_ORD_ID 52703 | cb8564_c11697/f1p0/4709 | isoform=cb8564_c47713;full_length_coverage=1;non_full_length_coverage=0;isoform_length=4233;expected_accuracy=0.997 | 1    | 3293 | 3288 | 4233 | 2    | 329 | 6 | 3425 | 437 | 0 |
| cb2737_c55/f1p1/2936                                                                                                | gnl BL_ORD_ID 68777 | cb2737_c19/f1p0/3583    | isoform=cb2737_c55;full_length_coverage=1;non_full_length_coverage=1;isoform_length=2936;expected_accuracy=1.000    | 1    | 1595 | 1593 | 2814 | 614  | 220 | 5 | 2337 | 355 | 8 |
| cb18287_c3/f1p0/1559                                                                                                | gnl BL_ORD_ID 32561 | cb18287_c2/f1p0/1786    | isoform=cb18287_c3;full_length_coverage=1;non_full_length_coverage=0;isoform_length=1786;expected_accuracy=0.998    | 280  | 1549 | 3    | 276  | 514  | 178 | 3 | 69   | 342 |   |

|                         |                                                                                                                                                                                              |                                               |      |      |      |      |          |          |          |     |
|-------------------------|----------------------------------------------------------------------------------------------------------------------------------------------------------------------------------------------|-----------------------------------------------|------|------|------|------|----------|----------|----------|-----|
| cb1974_c7/flp1/3734     | acy=0.996<br>gnl BL_ORD_ID 34704                      cb1974_c4/flp1/4106<br>isoform=cb1974_c4;full_length_coverage=1;non_full_length_coverage=1;isoform_length=4106;expected_accuracy=0.999 | 1785                                          | 3755 | 1    | 1786 | 2101 | 407<br>1 | 79       | 186<br>2 |     |
| cb5745_c11/flp0/1408    | gnl BL_ORD_ID 44881                      cb5745_c4/flp0/2698<br>isoform=cb5745_c4;full_length_coverage=1;non_full_length_coverage=0;isoform_length=2698;expected_accuracy=0.992              | 624                                           | 1407 | 7    | 625  | 1883 | 266<br>3 | 1        | 622      |     |
| cb8564_c89361/flp1/2277 | isoform=cb8564_c89361;full_length_coverage=1;non_full_length_coverage=1;isoform_length=2277;expected_accuracy=0.994                                                                          | gnl BL_ORD_ID 57088   cb8564_c82765/flp1/2779 | 461  | 2274 | 96   | 466  | 977      | 278<br>9 | 480      | 850 |
| cb6318_c8/flp1/2518     | gnl BL_ORD_ID 4925                      cb6318_c10/f2p0/2888<br>isoform=cb6318_c10;full_length_coverage=2;non_full_length_coverage=0;isoform_length=2888;expected_accuracy=1.000             | 101                                           | 2469 | 1    | 103  | 386  | 275<br>5 | 55       | 158      |     |
| cb14897_c14/flp0/1816   | gnl BL_ORD_ID 15625                      cb8564_c73578/flp1/4243<br>isoform=cb8564_c73578;full_length_coverage=1;non_full_length_coverage=1;isoform_length=4243;expected_accuracy=0.996      | 565                                           | 1732 | 60   | 565  | 3075 | 424<br>3 | 1        | 504      |     |
| cb373_c39/flp0/4415     | gnl BL_ORD_ID 40699                      cb373_c6/flp0/4615<br>isoform=cb373_c6;full_length_coverage=1;non_full_length_coverage=0;isoform_length=4615;expected_accuracy=0.997                | 254                                           | 3749 | 16   | 254  | 1117 | 461<br>5 | 6        | 243      |     |
| cb5449_c16/flp0/2392    | gnl BL_ORD_ID 46752                      cb5449_c13/flp0/2396                                                                                                                                | 1059                                          | 2280 | 1    | 1059 | 1177 | 239      | 1        | 105      |     |

|                                                                                                                     |                                                                                                                     |     |      |      |      |     |     |      |     |
|---------------------------------------------------------------------------------------------------------------------|---------------------------------------------------------------------------------------------------------------------|-----|------|------|------|-----|-----|------|-----|
|                                                                                                                     | isoform=cb5449_c13;full_length_coverage=1;non_full_length_coverage=0;isoform_length=2396;expected_accuracy=0.999    |     |      |      |      |     | 6   |      | 7   |
| cb8564_c20384/f1p4/2475                                                                                             | gnl BL_ORD_ID 13743      cb8564_c21615/f1p7/4576                                                                    |     |      |      |      |     |     |      |     |
| isoform=cb8564_c20384;full_length_coverage=1;non_full_length_coverage=4;isoform_length=2475;expected_accuracy=0.999 | isoform=cb8564_c21615;full_length_coverage=1;non_full_length_coverage=7;isoform_length=4576;expected_accuracy=0.993 | 1   | 1492 | 1493 | 2363 | 1   | 149 | 834  | 170 |
|                                                                                                                     | gnl BL_ORD_ID 26827      cb12_c28/f1p0/4906                                                                         |     |      |      |      |     |     |      |     |
| cb12_c37/f1p0/4067                                                                                                  | isoform=cb12_c28;full_length_coverage=1;non_full_length_coverage=0;isoform_length=4906;expected_accuracy=0.998      | 286 | 4080 | 186  | 288  | 921 | 471 | 689  | 791 |
|                                                                                                                     | gnl BL_ORD_ID 36136      cb2097_c106/f1p0/2666                                                                      |     |      |      |      |     |     |      |     |
| cb2097_c91/f1p0/2631                                                                                                | isoform=cb2097_c106;full_length_coverage=1;non_full_length_coverage=0;isoform_length=2666;expected_accuracy=1.000   | 598 | 2310 | 72   | 597  | 890 | 260 | 103  | 628 |
|                                                                                                                     | gnl BL_ORD_ID 12496      cb8564_c14618/f5p1/3581                                                                    |     |      |      |      |     |     |      |     |
| cb8564_c9893/f7p1/3111                                                                                              | isoform=cb8564_c14618;full_length_coverage=5;non_full_length_coverage=1;isoform_length=3581;expected_accuracy=0.997 | 21  | 2428 | 2426 | 3111 | 1   | 240 | 2840 | 352 |
|                                                                                                                     | gnl BL_ORD_ID 33426      cb1770_c13/f1p0/3529                                                                       |     |      |      |      |     |     |      |     |
| cb1770_c25/f1p0/3573                                                                                                | isoform=cb1770_c13;full_length_coverage=1;non_full_length_coverage=0;isoform_length=3529;expected_accuracy=1.000    | 138 | 3408 | 1    | 139  | 260 | 352 | 19   | 157 |
|                                                                                                                     | gnl BL_ORD_ID 16879      cb8564_c48606/f1p1/3308                                                                    |     |      |      |      |     |     |      |     |
| cb8564_c32509/f1p1/2880                                                                                             | isoform=cb8564_c48606;full_length_coverage=1;non_full_length_coverage=1;isoform_length=3308;expected_ac             | 2   | 2182 | 2178 | 2877 | 11  | 215 | 2587 | 328 |
| isoform=cb8564_c32509;full_length_coverage=1;non_full_length_coverage=1;isoform_length=2880;expected_ac             | ll_length_coverage=1;isoform_length=3308;expected_ac                                                                |     |      |      |      |     | 1   |      | 3   |

|                                                                                                                                                                  |                                                                                                                                                                                             |     |      |      |      |     |      |      |      |
|------------------------------------------------------------------------------------------------------------------------------------------------------------------|---------------------------------------------------------------------------------------------------------------------------------------------------------------------------------------------|-----|------|------|------|-----|------|------|------|
| accuracy=0.991<br>cb8564_c40764/f1p0/2563<br>isoform=cb8564_c40764;full_length_coverage=1;non_full_length_coverage=0;isoform_length=2563;expected_accuracy=0.997 | accuracy=0.998<br>gnl BL_ORD_ID 13024      cb8564_c161476/f1p4/2801<br>isoform=cb8564_c161476;full_length_coverage=1;non_full_length_coverage=4;isoform_length=2801;expected_accuracy=0.995 | 1   | 2167 | 2162 | 2563 | 1   | 2176 | 2387 | 2799 |
| cb8564_c170549/f2p3/3030<br>isoform=cb8564_c170549;full_length_coverage=2;non_full_length_coverage=3;isoform_length=3030;expected_accuracy=0.997                 | gnl BL_ORD_ID 11649      cb8564_c124383/f1p0/3136<br>isoform=cb8564_c124383;full_length_coverage=1;non_full_length_coverage=0;isoform_length=3136;expected_accuracy=0.997                   | 118 | 3010 | 1    | 117  | 223 | 3114 | 10   | 120  |
| cb9061_c27/f1p1/2278<br>isoform=cb9061_c27;full_length_coverage=1;non_full_length_coverage=1;isoform_length=2278;expected_accuracy=0.992                         | gnl BL_ORD_ID 58527      cb9061_c19/f1p0/2376                                                                                                                                               | 1   | 1451 | 1452 | 2201 | 22  | 1473 | 1581 | 2331 |
| cb8564_c23232/f1p3/2540                                                                                                                                          | gnl BL_ORD_ID 55583      cb8564_c45873/f1p2/2968                                                                                                                                            | 16  | 2172 | 2167 | 2518 | 5   | 2159 | 2261 | 2612 |
| cb2804_c159/f1p1/1802                                                                                                                                            | gnl BL_ORD_ID 38911      cb2804_c50/f2p0/2193<br>isoform=cb2804_c50;full_length_coverage=2;non_full_length_coverage=0;isoform_length=2193;expected_accuracy=0.992                           | 124 | 1699 | 1    | 126  | 619 | 2193 | 8    | 133  |
| cb4016_c32/f1p0/1913                                                                                                                                             | gnl BL_ORD_ID 40530      cb4016_c9/f1p1/2685<br>isoform=cb4016_c9;full_length_coverage=1;non_full_length_coverage=1;isoform_length=2685;expected_accuracy=0.996                             | 191 | 1930 | 25   | 194  | 853 | 2592 | 257  | 427  |
| cb3359_c35/f1p0/1632<br>isoform=cb3359_c35;full_length_coverage=1;non_full_length_coverage=0;isoform_length=1632;expected_accuracy=0.992                         | gnl BL_ORD_ID 40969      cb3359_c15/f1p0/3164<br>isoform=cb3359_c15;full_length_coverage=1;non_full_length_coverage=0;isoform_length=3164;expected_accuracy=0.992                           | 1   | 1469 | 1469 | 1632 | 52  | 1516 | 1624 | 1784 |

|                          |                                                                                                                                                                         |     |      |      |      |      |      |      |      |  |  |
|--------------------------|-------------------------------------------------------------------------------------------------------------------------------------------------------------------------|-----|------|------|------|------|------|------|------|--|--|
| racy=1.000               | acy=0.993                                                                                                                                                               |     |      |      |      |      |      |      |      |  |  |
| cb8564_c17122/f1p0/3317  | gnl BL_ORD_ID 13377      cb8564_c22091/f2p0/3351<br>isoform=cb8564_c22091;full_length_coverage=2;non_full_length_coverage=0;isoform_length=3351;expected_accuracy=0.997 | 12  | 1685 | 1682 | 3229 | 9    | 1682 | 1805 | 3351 |  |  |
| cb5224_c19/f1p0/2383     | gnl BL_ORD_ID 73655      cb5224_c22/f1p0/2626<br>isoform=cb5224_c19;full_length_coverage=1;non_full_length_coverage=0;isoform_length=2383;expected_accuracy=0.995       | 123 | 2383 | 1    | 124  | 249  | 2518 | 10   | 128  |  |  |
| cb4211_c6/f1p1/2925      | gnl BL_ORD_ID 71851      cb4211_c4/f1p2/3385<br>isoform=cb4211_c6;full_length_coverage=1;non_full_length_coverage=1;isoform_length=2925;expected_accuracy=0.994         | 11  | 1873 | 1869 | 2925 | 5    | 1872 | 2197 | 3256 |  |  |
| cb6000_c46/f1p0/1956     | gnl BL_ORD_ID 45166      cb6000_c2/f1p0/2873<br>isoform=cb6000_c46;full_length_coverage=1;non_full_length_coverage=0;isoform_length=1956;expected_accuracy=0.995        | 1   | 1145 | 1140 | 1956 | 9    | 1132 | 2057 | 2873 |  |  |
| cb8564_c42409/f1p0/3007  | gnl BL_ORD_ID 14531      cb8564_c41778/f1p9/3482<br>isoform=cb8564_c41778;full_length_coverage=1;non_full_length_coverage=9;isoform_length=3482;expected_accuracy=0.992 | 277 | 2899 | 107  | 281  | 812  | 3439 | 73   | 247  |  |  |
| cb8564_c52978/f1p0/2089  | gnl BL_ORD_ID 58087      cb8564_c88385/f1p0/2356<br>isoform=cb8564_c52978;full_length_coverage=1;non_full_length_coverage=0;isoform_length=2089;expected_accuracy=0.996 | 336 | 2089 | 66   | 341  | 452  | 2222 | 2    | 278  |  |  |
| cb8564_c109935/f2p1/2100 | gnl BL_ORD_ID 9761      cb8564_c114521/f1p0/3515                                                                                                                        | 536 | 2100 | 70   | 540  | 1948 | 351  | 1    | 477  |  |  |

|                                                                                                                                                  |                                                                                                                                                                      |     |      |      |      |     |      |      |      |  |
|--------------------------------------------------------------------------------------------------------------------------------------------------|----------------------------------------------------------------------------------------------------------------------------------------------------------------------|-----|------|------|------|-----|------|------|------|--|
| isoform=cb8564_c109935;full_length_coverage=2;non_full_length_coverage=1;isoform_length=2100;expected_accuracy=0.995<br>cb8564_c180116/f1p0/2944 | isoform=cb8564_c114521;full_length_coverage=1;non_full_length_coverage=0;isoform_length=3515;expected_accuracy=0.999                                                 |     |      |      |      |     |      | 3    |      |  |
| isoform=cb8564_c180116;full_length_coverage=1;non_full_length_coverage=0;isoform_length=2944;expected_accuracy=0.996<br>cb8564_c15404/f1p9/2596  | gnl BL_ORD_ID 56002 cb8564_c51722/f1p1/3503                                                                                                                          | 25  | 2522 | 2520 | 2944 | 67  | 2560 | 2789 | 3212 |  |
| isoform=cb8564_c15404;full_length_coverage=1;non_full_length_coverage=9;isoform_length=2596;expected_accuracy=0.991                              | gnl BL_ORD_ID 56644 cb8564_c50505/f1p0/3091                                                                                                                          | 441 | 2596 | 7    | 443  | 592 | 2741 | 8    | 441  |  |
| cb18456_c1748/f1p0/1180                                                                                                                          | gnl BL_ORD_ID 12159 cb8564_c125300/f1p1/2646<br>isoform=cb8564_c125300;full_length_coverage=1;non_full_length_coverage=1;isoform_length=2646;expected_accuracy=0.995 | 243 | 1188 | 4    | 248  | 976 | 32   | 1358 | 1114 |  |
| cb6978_c16/f1p1/2475                                                                                                                             | gnl BL_ORD_ID 50220 cb6978_c13/f1p0/2528                                                                                                                             | 1   | 1906 | 1907 | 2417 | 1   | 1909 | 2011 | 2521 |  |
| cb317_c5/f1p0/3451<br>isoform=cb317_c5;full_length_coverage=1;non_full_length_coverage=0;isoform_length=3451;expected_accuracy=0.998             | gnl BL_ORD_ID 37313 cb317_c17/f1p0/4336<br>isoform=cb317_c17;full_length_coverage=1;non_full_length_coverage=0;isoform_length=4336;expected_accuracy=0.993           | 1   | 3038 | 3033 | 3317 | 1   | 3026 | 3251 | 3533 |  |
| cb965_c18/f1p0/2545<br>isoform=cb965_c18;full_length_coverage=1;non_full_length_coverage=0;isoform_length=2545;expected_accuracy=1.000           | gnl BL_ORD_ID 20097 cb965_c6/f2p0/3258<br>isoform=cb965_c6;full_length_coverage=2;non_full_length_coverage=0;isoform_length=3258;expected_accuracy=0.996             | 1   | 1828 | 1831 | 2484 | 541 | 2367 | 2595 | 3258 |  |
| cb8564_c956/f2p0/2664                                                                                                                            | gnl BL_ORD_ID 14229 cb8564_c4515/f1p0/2986                                                                                                                           | 518 | 2654 | 9    | 517  | 795 | 292  | 1    | 508  |  |





|                                                                                                                                                              |                                                                                                                                                                    |     |      |      |      |      |          |      |          |
|--------------------------------------------------------------------------------------------------------------------------------------------------------------|--------------------------------------------------------------------------------------------------------------------------------------------------------------------|-----|------|------|------|------|----------|------|----------|
| racy=0.993<br>cb8564_c45300/f1p4/3014<br>isoform=cb8564_c45300;full_length_coverage=1;non_full_length_coverage=4;isoform_length=3014;expected_accuracy=0.996 | cy=0.999<br>gnl BL_ORD_ID 58037 cb8564_c87188/f1p1/3426                                                                                                            | 243 | 3014 | 21   | 246  | 505  | 327<br>9 | 127  | 348      |
| cb8564_c48473/f1p2/2701<br>isoform=cb8564_c48473;full_length_coverage=1;non_full_length_coverage=2;isoform_length=2701;expected_accuracy=0.999               | gnl BL_ORD_ID 16331 cb8564_c75969/f1p1/2798<br>isoform=cb8564_c75969;full_length_coverage=1;non_full_length_coverage=1;isoform_length=2798;expected_accuracy=0.997 | 220 | 2644 | 17   | 225  | 354  | 279<br>8 | 1    | 210      |
| cb6719_c52/f1p0/2293                                                                                                                                         | gnl BL_ORD_ID 6004 cb6719_c31/f1p0/2434<br>isoform=cb6719_c31;full_length_coverage=1;non_full_length_coverage=0;isoform_length=2434;expected_accuracy=0.995        | 641 | 2223 | 7    | 640  | 779  | 234<br>4 | 3    | 634      |
| cb8564_c90797/f1p0/2864                                                                                                                                      | gnl BL_ORD_ID 56983 cb8564_c79327/f1p1/3074                                                                                                                        | 15  | 2313 | 2308 | 2607 | 97   | 239<br>4 | 2516 | 281<br>5 |
| cb1224_c20/f1p0/3308<br>isoform=cb1224_c20;full_length_coverage=1;non_full_length_coverage=0;isoform_length=3308;expected_accuracy=0.997                     | gnl BL_ORD_ID 59284 cb1224_c19/f1p1/4162                                                                                                                           | 1   | 3180 | 3175 | 3308 | 203  | 338<br>4 | 3825 | 395<br>5 |
| cb4016_c32/f1p0/1913                                                                                                                                         | gnl BL_ORD_ID 39537 cb4016_c20/f1p1/2959<br>isoform=cb4016_c20;full_length_coverage=1;non_full_length_coverage=1;isoform_length=2959;expected_accuracy=0.992       | 191 | 1930 | 23   | 194  | 1125 | 286<br>6 | 526  | 700      |
| cb18793_c2/f1p2/5878                                                                                                                                         | gnl BL_ORD_ID 34963 cb18793_c1/f1p1/6347<br>isoform=cb18793_c1;full_length_coverage=1;non_full_length_coverage=1;isoform_length=6347;expected_accuracy=0.999       | 1   | 4389 | 4387 | 5867 | 6    | 438<br>9 | 4875 | 634<br>6 |

|                          |                                                                                                                                                                                              |      |      |      |      |      |      |      |      |
|--------------------------|----------------------------------------------------------------------------------------------------------------------------------------------------------------------------------------------|------|------|------|------|------|------|------|------|
| cb5769_c3/flp0/2310      | acy=0.994<br>gnl BL_ORD_ID 47115                      cb5769_c1/f2p0/2914<br>isoform=cb5769_c1;full_length_coverage=2;non_full_length_coverage=0;isoform_length=2914;expected_accuracy=0.996 | 201  | 2277 | 1    | 205  | 839  | 2914 | 86   | 289  |
| cb18456_c1748/flp0/1180  | gnl BL_ORD_ID 11861                      cb8564_c126350/flp2/2554<br>isoform=cb8564_c126350;full_length_coverage=1;non_full_length_coverage=2;isoform_length=2554;expected_accuracy=0.996    | 243  | 1188 | 7    | 248  | 974  | 30   | 1346 | 1112 |
| cb8564_c40598/flp4/3119  | gnl BL_ORD_ID 16886                      cb8564_c50727/flp0/3201<br>isoform=cb8564_c50727;full_length_coverage=1;non_full_length_coverage=0;isoform_length=3201;expected_accuracy=0.999      | 1    | 2732 | 2729 | 3053 | 3    | 2756 | 2877 | 3201 |
| cb8564_c35645/flp0/2804  | gnl BL_ORD_ID 54405                      cb8564_c35890/flp0/3157                                                                                                                             | 150  | 2716 | 1    | 151  | 270  | 2836 | 7    | 157  |
| cb5204_c7/flp0/3044      | gnl BL_ORD_ID 46181                      cb5204_c6/flp1/2901<br>isoform=cb5204_c6;full_length_coverage=1;non_full_length_coverage=1;isoform_length=2901;expected_accuracy=0.997              | 1    | 1717 | 1717 | 2763 | 23   | 1739 | 1855 | 2901 |
| cb8564_c132218/flp5/2319 | gnl BL_ORD_ID 55921                      cb8564_c48990/flp2/2740                                                                                                                             | 1079 | 2249 | 1    | 1075 | 1549 | 2719 | 15   | 1087 |
| cb5515_c1/flp0/1999      | gnl BL_ORD_ID 47062                      cb5515_c0/flp0/3081<br>isoform=cb5515_c1;full_length_coverage=1;non_full_length_coverage=0;isoform_length=1999;expected_accuracy=0.996              | 1    | 1372 | 1371 | 1999 | 5    | 1379 | 2244 | 2876 |
| cb454_c4/f3p0/2268       | gnl BL_ORD_ID 42152                      cb454_c9/flp0/2795                                                                                                                                  | 221  | 2255 | 1    | 220  | 763  | 279  | 442  | 659  |

|                                                                                                                                                |                                                                                                                                                                          |     |      |      |      |     |      |      |      |   |
|------------------------------------------------------------------------------------------------------------------------------------------------|--------------------------------------------------------------------------------------------------------------------------------------------------------------------------|-----|------|------|------|-----|------|------|------|---|
| isoform=cb454_c4;full_length_coverage=3;non_full_length_coverage=0;isoform_length=2268;expected_accuracy=1.000<br>cb8564_c15573/f1p0/3752      | isoform=cb454_c9;full_length_coverage=1;non_full_length_coverage=0;isoform_length=2795;expected_accuracy=0.992<br>gnl BL_ORD_ID 14333      cb8564_c39696/f4p3/4068       |     |      |      |      |     |      |      |      | 5 |
| isoform=cb8564_c15573;full_length_coverage=1;non_full_length_coverage=0;isoform_length=3752;expected_accuracy=0.997<br>cb8564_c37361/f1p0/3076 | isoform=cb8564_c39696;full_length_coverage=4;non_full_length_coverage=3;isoform_length=4068;expected_accuracy=0.997<br>gnl BL_ORD_ID 16681      cb8564_c54233/f1p1/3194  | 1   | 2900 | 2896 | 3752 | 168 | 3079 | 3194 | 4050 |   |
| cb8564_c83113/f1p0/2883                                                                                                                        | isoform=cb8564_c54233;full_length_coverage=1;non_full_length_coverage=1;isoform_length=3194;expected_accuracy=0.995<br>gnl BL_ORD_ID 57807      cb8564_c81227/f1p0/3713  | 2   | 2481 | 2477 | 3066 | 8   | 2504 | 2605 | 3194 |   |
| isoform=cb8564_c83113;full_length_coverage=1;non_full_length_coverage=0;isoform_length=2883;expected_accuracy=0.996<br>cb4016_c32/f1p0/1913    | gnl BL_ORD_ID 40899      cb4016_c15/f1p1/2488                                                                                                                            | 184 | 2878 | 1    | 187  | 744 | 3439 | 11   | 198  |   |
| cb4016_c32/f1p0/1913                                                                                                                           | isoform=cb4016_c15;full_length_coverage=1;non_full_length_coverage=1;isoform_length=2488;expected_accuracy=1.000<br>gnl BL_ORD_ID 52656      cb8564_c10132/f1p8/3379     | 191 | 1930 | 7    | 194  | 749 | 2488 | 132  | 321  |   |
| cb18456_c3695/f1p0/1345                                                                                                                        | gnl BL_ORD_ID 13105      cb8564_c165846/f1p5/3154                                                                                                                        | 1   | 1051 | 1047 | 1293 | 235 | 1285 | 1460 | 1706 |   |
| cb8564_c129638/f1p0/2479                                                                                                                       | isoform=cb8564_c165846;full_length_coverage=1;non_full_length_coverage=5;isoform_length=3154;expected_accuracy=0.995<br>gnl BL_ORD_ID 55391      cb8564_c40278/f3p2/3083 | 1   | 1627 | 1623 | 2475 | 140 | 1766 | 2171 | 3023 |   |
| cb8564_c186356/f1p0/2744                                                                                                                       | gnl BL_ORD_ID 55391      cb8564_c40278/f3p2/3083                                                                                                                         | 1   | 1396 | 1393 | 2744 | 1   | 139  | 1516 | 286  |   |

|                                                                                                                      |                     |                         |                                                                                                                     |      |      |      |      |      |      |      |      |
|----------------------------------------------------------------------------------------------------------------------|---------------------|-------------------------|---------------------------------------------------------------------------------------------------------------------|------|------|------|------|------|------|------|------|
| isoform=cb8564_c186356;full_length_coverage=1;non_full_length_coverage=0;isoform_length=2744;expected_accuracy=0.998 |                     |                         |                                                                                                                     |      |      |      |      | 6    | 7    |      |      |
| cb1030_c20/f1p1/3218                                                                                                 | gnl BL_ORD_ID 1808  | cb1030_c5/f2p0/3347     | isoform=cb1030_c5;full_length_coverage=2;non_full_length_coverage=0;isoform_length=3347;expected_accuracy=0.997     | 1    | 2775 | 2778 | 3173 | 1    | 2774 | 2900 | 3295 |
| cb8564_c31577/f2p6/3328                                                                                              | gnl BL_ORD_ID 13106 | cb8564_c16615/f1p2/3838 | isoform=cb8564_c16615;full_length_coverage=1;non_full_length_coverage=2;isoform_length=3328;expected_accuracy=0.999 | 396  | 3328 | 85   | 396  | 911  | 3830 | 1    | 313  |
| cb4972_c64/f1p0/2792                                                                                                 | gnl BL_ORD_ID 42088 | cb4972_c10/f2p1/2837    | isoform=cb4972_c10;full_length_coverage=2;non_full_length_coverage=1;isoform_length=2837;expected_accuracy=1.000    | 1    | 1345 | 1344 | 2678 | 5    | 1347 | 1477 | 2811 |
| cb1492_c3/f1p2/4122                                                                                                  | gnl BL_ORD_ID 29081 | cb1492_c1/f1p2/4305     | isoform=cb1492_c1;full_length_coverage=1;non_full_length_coverage=2;isoform_length=4122;expected_accuracy=0.994     | 1292 | 3966 | 1    | 1291 | 1621 | 4304 | 25   | 1316 |
| cb8564_c10713/f1p4/3120                                                                                              | gnl BL_ORD_ID 12601 | cb8564_c13656/f1p0/3139 | isoform=cb8564_c13656;full_length_coverage=1;non_full_length_coverage=4;isoform_length=3120;expected_accuracy=0.992 | 24   | 2667 | 2666 | 3062 | 1    | 2641 | 2742 | 3139 |
| cb4949_c7/f1p0/2266                                                                                                  | gnl BL_ORD_ID 73116 | cb4949_c5/f1p0/2987     | isoform=cb4949_c7;full_length_coverage=1;non_full_length_coverage=0;isoform_length=2266;expected_accuracy=0.999     | 10   | 1758 | 1755 | 2266 | 17   | 1753 | 2437 | 2948 |

|                                                                                                                   |                                                                                                                                                                      |     |      |      |      |      |      |      |     |   |
|-------------------------------------------------------------------------------------------------------------------|----------------------------------------------------------------------------------------------------------------------------------------------------------------------|-----|------|------|------|------|------|------|-----|---|
| acy=0.999                                                                                                         |                                                                                                                                                                      |     |      |      |      |      |      |      |     |   |
| cb8564_c83062/f1p1/2429                                                                                           | gnl BL_ORD_ID 58137 cb8564_c89794/f1p1/2867                                                                                                                          | 1   | 1638 | 1637 | 2423 | 2    | 163  | 1812 | 259 | 8 |
| cb8456_c137/f1p0/1507                                                                                             |                                                                                                                                                                      |     |      |      |      |      |      |      |     |   |
| isoform=cb8456_c137;full_length_coverage=1;non_full_length_coverage=0;isoform_length=1507;expected_accuracy=0.994 | gnl BL_ORD_ID 52551 cb8456_c69/f1p0/2253                                                                                                                             | 650 | 1507 | 9    | 654  | 1028 | 188  | 9    | 654 | 7 |
| cb4686_c4/f1p0/2845                                                                                               | gnl BL_ORD_ID 42972 cb4686_c2/f1p0/3164<br>isoform=cb4686_c2;full_length_coverage=1;non_full_length_coverage=0;isoform_length=3164;expected_accuracy=0.995           | 106 | 1851 | 1850 | 2807 | 1    | 174  | 2209 | 316 | 4 |
| cb868_c29/f1p0/3279                                                                                               | gnl BL_ORD_ID 57583 cb868_c6/f1p0/3726                                                                                                                               | 1   | 1514 | 1512 | 2901 | 601  | 2114 | 2305 | 369 | 4 |
| cb12714_c29/f1p2/1583                                                                                             | gnl BL_ORD_ID 11483 cb8564_c12665/f1p15/2806<br>isoform=cb8564_c12665;full_length_coverage=1;non_full_length_coverage=15;isoform_length=2806;expected_accuracy=0.995 | 1   | 1296 | 1293 | 1592 | 2    | 130  | 2370 | 267 | 1 |
| cb8564_c44420/f1p0/2853                                                                                           | gnl BL_ORD_ID 13472 cb8564_c182192/f1p6/3150<br>isoform=cb8564_c182192;full_length_coverage=1;non_full_length_coverage=6;isoform_length=3150;expected_accuracy=0.995 | 14  | 1487 | 1484 | 2851 | 98   | 157  | 1788 | 315 | 0 |
| cb8564_c180679/f1p0/2109                                                                                          | gnl BL_ORD_ID 13611 cb8564_c2184/f1p0/2606<br>isoform=cb8564_c2184;full_length_coverage=1;non_full_length_coverage=0;isoform_length=2606;expected_accuracy=0.995     | 198 | 2109 | 1    | 202  | 692  | 260  | 1    | 202 | 3 |
| cb7337_c6/f1p0/1841                                                                                               | gnl BL_ORD_ID 50484 cb7337_c1/f1p0/2641                                                                                                                              | 1   | 1684 | 1682 | 1841 | 13   | 169  | 1808 | 196 |   |

|                                                                                                                                                |                                                                                                                                                                         |    |      |      |      |    |          |      |          |
|------------------------------------------------------------------------------------------------------------------------------------------------|-------------------------------------------------------------------------------------------------------------------------------------------------------------------------|----|------|------|------|----|----------|------|----------|
| isoform=cb7337_c6;full_length_coverage=1;non_full_length_coverage=0;isoform_length=1841;expected_accuracy=0.992                                |                                                                                                                                                                         |    |      |      |      |    |          | 8    | 6        |
| cb8564_c70954/f1p0/2365                                                                                                                        | gnl BL_ORD_ID 17359      cb8564_c89607/f1p0/2600<br>isoform=cb8564_c89607;full_length_coverage=1;non_full_length_coverage=0;isoform_length=2600;expected_accuracy=1.000 | 1  | 1181 | 1180 | 2257 | 1  | 1183     | 1441 | 251<br>6 |
| cb8564_c5070/f1p0/2861                                                                                                                         | gnl BL_ORD_ID 56564      cb8564_c5063/f1p0/3368                                                                                                                         | 10 | 1660 | 1659 | 2831 | 61 | 1711     | 1604 | 277<br>5 |
| cb8564_c4645/f1p1/2620<br>isoform=cb8564_c4645;full_length_coverage=1;non_full_length_coverage=1;isoform_length=2620;expected_accuracy=0.994   | gnl BL_ORD_ID 14567      cb8564_c4647/f1p2/2774<br>isoform=cb8564_c4647;full_length_coverage=1;non_full_length_coverage=2;isoform_length=2774;expected_accuracy=0.992   | 1  | 1828 | 1829 | 2567 | 32 | 189<br>0 | 2017 | 277<br>4 |
| cb8564_c37361/f1p0/3076                                                                                                                        | gnl BL_ORD_ID 15924      cb8564_c52804/f1p5/3221<br>isoform=cb8564_c52804;full_length_coverage=1;non_full_length_coverage=5;isoform_length=3221;expected_accuracy=0.999 | 1  | 2481 | 2477 | 3070 | 1  | 248<br>0 | 2581 | 317<br>5 |
| cb8564_c41756/f1p0/2738<br>isoform=cb8564_c41756;full_length_coverage=1;non_full_length_coverage=0;isoform_length=2738;expected_accuracy=0.996 | gnl BL_ORD_ID 55574      cb8564_c45699/f1p0/3005                                                                                                                        | 1  | 2173 | 2170 | 2738 | 1  | 215<br>9 | 2282 | 284<br>8 |
| cb8564_c36011/f1p0/3015                                                                                                                        | gnl BL_ORD_ID 17556      cb8564_c9820/f2p0/3032<br>isoform=cb8564_c9820;full_length_coverage=2;non_full_length_coverage=0;isoform_length=3032;expected_accuracy=0.995   | 10 | 1718 | 1716 | 2617 | 9  | 170<br>4 | 2131 | 303<br>2 |
| cb2279_c4/f1p2/2606                                                                                                                            | gnl BL_ORD_ID 36531      cb2279_c0/f10p3/2834                                                                                                                           | 1  | 1359 | 1357 | 2593 | 13 | 136      | 1580 | 281      |

|                                                                                                                                          |                                                                                                                                                                                         |     |      |      |      |     |      |   |      |     |
|------------------------------------------------------------------------------------------------------------------------------------------|-----------------------------------------------------------------------------------------------------------------------------------------------------------------------------------------|-----|------|------|------|-----|------|---|------|-----|
| isoform=cb2279_c4;full_length_coverage=1;non_full_length_coverage=2;isoform_length=2606;expected_accuracy=0.996<br>cb12302_c31/f1p0/1548 | isoform=cb2279_c0;full_length_coverage=10;non_full_length_coverage=3;isoform_length=2834;expected_accuracy=1.000<br>gnl BL_ORD_ID 27352                      cb1380_c18/f1p6/2264       |     |      |      |      |     |      | 8 |      | 6   |
| isoform=cb12302_c31;full_length_coverage=1;non_full_length_coverage=0;isoform_length=1548;expected_accuracy=1.000                        | isoform=cb1380_c18;full_length_coverage=1;non_full_length_coverage=6;isoform_length=2264;expected_accuracy=0.997<br>gnl BL_ORD_ID 12899                      cb8564_c181074/f1p0/2725   | 324 | 1548 | 8    | 329  | 560 | 178  | 4 | 1    | 316 |
| cb8564_c90797/f1p0/2864                                                                                                                  | isoform=cb8564_c181074;full_length_coverage=1;non_full_length_coverage=0;isoform_length=2725;expected_accuracy=1.000<br>gnl BL_ORD_ID 4198                      cb6471_c20/f1p0/3013    | 17  | 2307 | 2308 | 2643 | 1   | 226  | 8 | 2395 | 272 |
| cb6471_c27/f1p0/2602                                                                                                                     | isoform=cb6471_c20;full_length_coverage=1;non_full_length_coverage=0;isoform_length=3013;expected_accuracy=0.992<br>gnl BL_ORD_ID 39466                      cb3603_c36/f1p0/5599       | 1   | 1863 | 1864 | 2598 | 257 | 2116 |   | 2275 | 301 |
| cb3603_c31/f1p0/4927                                                                                                                     | isoform=cb3603_c36;full_length_coverage=1;non_full_length_coverage=0;isoform_length=5599;expected_accuracy=0.992<br>gnl BL_ORD_ID 14810                      cb8564_c34492/f1p1/3811    | 205 | 4072 | 4070 | 4927 | 210 | 410  | 5 | 4651 | 550 |
| isoform=cb3603_c31;full_length_coverage=1;non_full_length_coverage=0;isoform_length=4927;expected_accuracy=0.996                         | isoform=cb8564_c34492;full_length_coverage=1;non_full_length_coverage=1;isoform_length=3811;expected_accuracy=0.991<br>gnl BL_ORD_ID 56623                      cb8564_c49310/f1p2/3045 | 235 | 3238 | 1    | 236  | 771 | 3811 |   | 1    | 239 |
| cb8564_c46104/f1p0/3297                                                                                                                  | isoform=cb8564_c49562;full_length_coverage=1;non_full_length_coverage=0;isoform_length=2838;expected_                                                                                   | 23  | 2331 | 2327 | 2838 | 65  | 237  | 8 | 2485 | 299 |
| cb8564_c49562/f1p0/2838                                                                                                                  |                                                                                                                                                                                         |     |      |      |      |     | 8    |   |      | 8   |



|                                                                                                                                                                  |                                                                                                                                                                           |     |      |      |      |     |      |      |      |
|------------------------------------------------------------------------------------------------------------------------------------------------------------------|---------------------------------------------------------------------------------------------------------------------------------------------------------------------------|-----|------|------|------|-----|------|------|------|
| accuracy=0.995<br>cb8564_c34238/f4p1/4317<br>isoform=cb8564_c34238;full_length_coverage=4;non_full_length_coverage=1;isoform_length=4317;expected_accuracy=1.000 | gnl BL_ORD_ID 14819      cb8564_c40333/f1p2/4446<br>isoform=cb8564_c40333;full_length_coverage=1;non_full_length_coverage=2;isoform_length=4446;expected_accuracy=0.998   | 15  | 3270 | 3266 | 4165 | 1   | 3280 | 3545 | 4446 |
| cb7023_c0/f2p1/2542<br>isoform=cb7023_c0;full_length_coverage=2;non_full_length_coverage=1;isoform_length=2542;expected_accuracy=0.996                           | gnl BL_ORD_ID 3664      cb7023_c4/f1p0/2631<br>isoform=cb7023_c4;full_length_coverage=1;non_full_length_coverage=0;isoform_length=2631;expected_accuracy=0.995            | 1   | 2041 | 2039 | 2519 | 2   | 2043 | 2151 | 2631 |
| cb8564_c15951/f1p1/3969<br>isoform=cb8564_c15951;full_length_coverage=1;non_full_length_coverage=1;isoform_length=3969;expected_accuracy=0.997                   | gnl BL_ORD_ID 13700      cb8564_c20054/f1p0/4502<br>isoform=cb8564_c20054;full_length_coverage=1;non_full_length_coverage=0;isoform_length=4502;expected_accuracy=1.000   | 1   | 3328 | 3329 | 3969 | 24  | 3352 | 3762 | 4404 |
| cb8564_c77380/f2p0/3010<br>isoform=cb8564_c77380;full_length_coverage=2;non_full_length_coverage=0;isoform_length=3010;expected_accuracy=0.998                   | gnl BL_ORD_ID 11240      cb8564_c145553/f1p3/3270<br>isoform=cb8564_c145553;full_length_coverage=1;non_full_length_coverage=3;isoform_length=3270;expected_accuracy=0.996 | 141 | 1900 | 1899 | 3010 | 1   | 1760 | 2145 | 3253 |
| cb6277_c14/f1p1/2588<br>isoform=cb6277_c14;full_length_coverage=1;non_full_length_coverage=1;isoform_length=2588;expected_accuracy=0.995                         | gnl BL_ORD_ID 3491      cb6277_c8/f1p0/2793<br>isoform=cb6277_c8;full_length_coverage=1;non_full_length_coverage=0;isoform_length=2793;expected_accuracy=0.999            | 13  | 1436 | 1436 | 2495 | 1   | 1425 | 1731 | 2793 |
| cb8564_c39136/f1p0/3036<br>isoform=cb8564_c39136;full_length_coverage=1;non_full_length_coverage=0;isoform_length=3036;expected_accuracy=0.998                   | gnl BL_ORD_ID 55182      cb8564_c34825/f1p2/3200                                                                                                                          | 11  | 2089 | 2085 | 3036 | 6   | 2119 | 2246 | 3196 |
| cb4016_c32/f1p0/1913                                                                                                                                             | gnl BL_ORD_ID 40898      cb4016_c16/f3p2/2553                                                                                                                             | 191 | 1930 | 7    | 194  | 719 | 245  | 103  | 291  |

|                                                                                                                      |                                                                                                                     |      |      |      |      |      |      |      |      |  |
|----------------------------------------------------------------------------------------------------------------------|---------------------------------------------------------------------------------------------------------------------|------|------|------|------|------|------|------|------|--|
|                                                                                                                      | isoform=cb4016_c16;full_length_coverage=3;non_full_length_coverage=2;isoform_length=2553;expected_accuracy=0.996    |      |      |      |      |      |      | 8    |      |  |
| cb8564_c134351/f3p2/2684                                                                                             | gnl BL_ORD_ID 11179      cb8564_c11761/f4p0/2940                                                                    |      |      |      |      |      |      |      |      |  |
| isoform=cb8564_c134351;full_length_coverage=3;non_full_length_coverage=2;isoform_length=2684;expected_accuracy=0.996 | isoform=cb8564_c11761;full_length_coverage=4;non_full_length_coverage=0;isoform_length=2940;expected_accuracy=0.996 | 1    | 1802 | 1798 | 2629 | 1    | 1807 | 2043 | 2876 |  |
| cb5725_c35/f1p0/2272                                                                                                 | gnl BL_ORD_ID 74341      cb5725_c19/f1p0/3053                                                                       |      |      |      |      |      |      |      |      |  |
| isoform=cb5725_c35;full_length_coverage=1;non_full_length_coverage=0;isoform_length=2272;expected_accuracy=1.000     |                                                                                                                     | 1    | 1369 | 1366 | 2211 | 51   | 1418 | 2201 | 3046 |  |
| cb8564_c42677/f1p0/3180                                                                                              | gnl BL_ORD_ID 14410      cb8564_c44256/f1p1/3267                                                                    |      |      |      |      |      |      |      |      |  |
|                                                                                                                      | isoform=cb8564_c44256;full_length_coverage=1;non_full_length_coverage=1;isoform_length=3267;expected_accuracy=0.995 | 21   | 2132 | 2128 | 2842 | 14   | 2119 | 2553 | 3266 |  |
| cb12310_c27/f1p0/1191                                                                                                | gnl BL_ORD_ID 23378      cb12310_c7/f2p0/1721                                                                       |      |      |      |      |      |      |      |      |  |
|                                                                                                                      | isoform=cb12310_c7;full_length_coverage=2;non_full_length_coverage=0;isoform_length=1721;expected_accuracy=1.000    | 210  | 991  | 1    | 213  | 940  | 1721 | 3    | 216  |  |
| cb8564_c15653/f1p4/2475                                                                                              | gnl BL_ORD_ID 58013      cb8564_c86635/f1p17/2750                                                                   |      |      |      |      |      |      |      |      |  |
|                                                                                                                      |                                                                                                                     | 1    | 2293 | 2289 | 2482 | 1    | 2293 | 2512 | 2705 |  |
| cb4233_c109/f1p3/2092                                                                                                | gnl BL_ORD_ID 44053      cb4233_c239/f1p1/2275                                                                      |      |      |      |      |      |      |      |      |  |
| isoform=cb4233_c109;full_length_coverage=1;non_full_length_coverage=3;isoform_length=2092;expected_accuracy=0.994    | isoform=cb4233_c239;full_length_coverage=16;non_full_length_coverage=1;isoform_length=2275;expected_accuracy=1.000  | 1    | 1522 | 1517 | 2086 | 50   | 1580 | 1704 | 2275 |  |
| cb8564_c46081/f1p0/3421                                                                                              | gnl BL_ORD_ID 16878      cb8564_c48607/f1p0/4177                                                                    |      |      |      |      |      |      |      |      |  |
|                                                                                                                      |                                                                                                                     | 1299 | 3321 | 1    | 1298 | 2157 | 417  | 22   | 131  |  |

|                                                                                                                      |                                                                                                                                                                           |     |      |      |      |      |      |      |      |
|----------------------------------------------------------------------------------------------------------------------|---------------------------------------------------------------------------------------------------------------------------------------------------------------------------|-----|------|------|------|------|------|------|------|
|                                                                                                                      | isoform=cb8564_c48607;full_length_coverage=1;non_full_length_coverage=0;isoform_length=4177;expected_accuracy=0.991                                                       |     |      |      |      |      |      | 7    | 5    |
| cb8564_c39546/f1p2/3023                                                                                              | gnl BL_ORD_ID 14410      cb8564_c44256/f1p1/3267<br>isoform=cb8564_c44256;full_length_coverage=1;non_full_length_coverage=1;isoform_length=3267;expected_accuracy=0.995   | 1   | 2122 | 2118 | 2835 | 1    | 2119 | 2553 | 3267 |
| cb8564_c38251/f1p0/3243                                                                                              | gnl BL_ORD_ID 17429      cb8564_c85447/f1p0/3196<br>isoform=cb8564_c85447;full_length_coverage=1;non_full_length_coverage=0;isoform_length=3196;expected_accuracy=0.997   | 1   | 2439 | 2438 | 2973 | 3    | 2413 | 2660 | 3195 |
| cb9863_c0/f2p0/1727                                                                                                  |                                                                                                                                                                           |     |      |      |      |      |      |      |      |
| isoform=cb9863_c0;full_length_coverage=2;non_full_length_coverage=0;isoform_length=1727;expected_accuracy=1.000      | gnl BL_ORD_ID 60037      cb9863_c3/f1p0/5975                                                                                                                              | 1   | 1197 | 1192 | 1727 | 6    | 1202 | 4862 | 5398 |
| cb8_c5/f1p1/4485                                                                                                     |                                                                                                                                                                           |     |      |      |      |      |      |      |      |
| isoform=cb8_c5;full_length_coverage=1;non_full_length_coverage=1;isoform_length=4485;expected_accuracy=0.997         | gnl BL_ORD_ID 59026      cb8_c6/f1p0/4495                                                                                                                                 | 263 | 4291 | 1    | 268  | 469  | 4499 | 6    | 273  |
| cb8564_c159910/f2p1/2333                                                                                             |                                                                                                                                                                           |     |      |      |      |      |      |      |      |
| isoform=cb8564_c159910;full_length_coverage=2;non_full_length_coverage=1;isoform_length=2333;expected_accuracy=0.991 | gnl BL_ORD_ID 10006      cb8564_c109862/f2p0/3191<br>isoform=cb8564_c109862;full_length_coverage=2;non_full_length_coverage=0;isoform_length=3191;expected_accuracy=0.999 | 164 | 2325 | 1    | 166  | 1032 | 3191 | 1    | 168  |
| cb8564_c10872/f1p2/2947                                                                                              |                                                                                                                                                                           |     |      |      |      |      |      |      |      |
| isoform=cb8564_c10872;full_length_coverage=1;non_full_length_coverage=2;isoform_length=2947;expected_                | gnl BL_ORD_ID 10743      cb8564_c10713/f1p4/3120<br>isoform=cb8564_c10713;full_length_coverage=1;non_full_length_coverage=4;isoform_length=3120;expected_ac               | 1   | 2667 | 2666 | 2925 | 3    | 2666 | 2806 | 3066 |

|                                                                                                                                                            |                                                                                                                                                                                           |     |      |      |      |     |      |      |      |
|------------------------------------------------------------------------------------------------------------------------------------------------------------|-------------------------------------------------------------------------------------------------------------------------------------------------------------------------------------------|-----|------|------|------|-----|------|------|------|
| accuracy=0.994<br>cb18287_c2/f1p0/1786<br>isoform=cb18287_c2;full_length_coverage=1;non_full_length_coverage=0;isoform_length=1786;expected_accuracy=0.996 | accuracy=0.992<br>gnl BL_ORD_ID 15918      cb8564_c72237/f1p0/2397<br>isoform=cb8564_c72237;full_length_coverage=1;non_full_length_coverage=0;isoform_length=2397;expected_accuracy=0.995 | 346 | 1785 | 69   | 345  | 960 | 2397 | 3    | 278  |
| cb8564_c74375/f1p1/2718<br>isoform=cb8564_c74375;full_length_coverage=1;non_full_length_coverage=1;isoform_length=2718;expected_accuracy=1.000             | gnl BL_ORD_ID 18074      cb8564_c79813/f1p1/2853<br>isoform=cb8564_c79813;full_length_coverage=1;non_full_length_coverage=1;isoform_length=2853;expected_accuracy=1.000                   | 1   | 1609 | 1608 | 2717 | 1   | 1636 | 1745 | 2853 |
| cb781_c2/f3p0/1827<br>isoform=cb781_c2;full_length_coverage=3;non_full_length_coverage=0;isoform_length=1827;expected_accuracy=0.999                       | gnl BL_ORD_ID 7264      cb781_c0/f1p1/1956<br>isoform=cb781_c0;full_length_coverage=11;non_full_length_coverage=1;isoform_length=1956;expected_accuracy=1.000                             | 1   | 1243 | 1243 | 1827 | 24  | 1266 | 1371 | 1955 |
| cb8687_c8/f1p0/1570                                                                                                                                        | gnl BL_ORD_ID 18631      cb8687_c5/f1p0/1932<br>isoform=cb8687_c5;full_length_coverage=1;non_full_length_coverage=0;isoform_length=1932;expected_accuracy=1.000                           | 581 | 1549 | 7    | 581  | 929 | 1897 | 18   | 592  |
| cb8564_c7774/f3p4/1962<br>isoform=cb8564_c7774;full_length_coverage=3;non_full_length_coverage=4;isoform_length=1962;expected_accuracy=1.000               | gnl BL_ORD_ID 56567      cb8564_c5087/f1p0/3205                                                                                                                                           | 1   | 1461 | 1461 | 1962 | 10  | 1477 | 2633 | 3127 |
| cb7143_c5/f1p0/2139                                                                                                                                        | gnl BL_ORD_ID 6196      cb7143_c4/f1p0/2390<br>isoform=cb7143_c4;full_length_coverage=1;non_full_length_coverage=0;isoform_length=2390;expected_accuracy=0.993                            | 10  | 1266 | 1264 | 2137 | 1   | 1252 | 1516 | 2390 |
| cb8564_c5107/f1p2/3747                                                                                                                                     | gnl BL_ORD_ID 16247      cb8564_c5117/f1p0/4873                                                                                                                                           | 15  | 1936 | 1934 | 3722 | 7   | 192  | 3088 | 487  |

|                                                                                                                                                 |                                                                                                                                                                                                                |      |      |      |      |      |          |      |          |
|-------------------------------------------------------------------------------------------------------------------------------------------------|----------------------------------------------------------------------------------------------------------------------------------------------------------------------------------------------------------------|------|------|------|------|------|----------|------|----------|
| isoform=cb8564_c5107;full_length_coverage=1;non_full_length_coverage=2;isoform_length=3747;expected_accuracy=0.994<br>cb5346_c6/f1p0/1741       | isoform=cb8564_c5117;full_length_coverage=1;non_full_length_coverage=0;isoform_length=4873;expected_accuracy=0.999                                                                                             |      |      |      |      |      |          | 1    | 1        |
| isoform=cb5346_c6;full_length_coverage=1;non_full_length_coverage=0;isoform_length=1741;expected_accuracy=0.997<br>cb8564_c17933/f1p0/2278      | gnl BL_ORD_ID 73808 cb5346_c0/f1p0/3122                                                                                                                                                                        | 185  | 1740 | 31   | 183  | 1169 | 272<br>2 | 4    | 156      |
| isoform=cb8564_c17933;full_length_coverage=1;non_full_length_coverage=0;isoform_length=2278;expected_accuracy=1.000<br>cb8564_c42906/f1p2/3181  | gnl BL_ORD_ID 12288 cb8564_c14928/f1p0/2382<br>isoform=cb8564_c14928;full_length_coverage=1;non_full_length_coverage=0;isoform_length=2382;expected_accuracy=0.995                                             | 1    | 1525 | 1525 | 2244 | 1    | 152<br>7 | 1663 | 238<br>2 |
| isoform=cb8564_c42906;full_length_coverage=1;non_full_length_coverage=4;isoform_length=3014;expected_accuracy=0.996<br>cb6889_c8/f1p0/2744      | gnl BL_ORD_ID 55939 cb8564_c49630/f1p4/3487                                                                                                                                                                    | 2    | 2894 | 2894 | 3144 | 1    | 291<br>3 | 3243 | 349<br>3 |
| isoform=cb8564_c45300;full_length_coverage=1;non_full_length_coverage=4;isoform_length=3014;expected_accuracy=0.996<br>cb8564_c36731/f1p2/2761  | gnl BL_ORD_ID 16149 cb8564_c47162/f1p0/3361<br>isoform=cb8564_c47162;full_length_coverage=1;non_full_length_coverage=0;isoform_length=3361;expected_accuracy=0.996                                             | 244  | 3014 | 1    | 246  | 592  | 336<br>1 | 1    | 243      |
| isoform=cb8564_c46562;full_length_coverage=2;non_full_length_coverage=3;isoform_length=3196;expected_accuracy=0.995<br>cb8564_c178226/f1p0/2728 | gnl BL_ORD_ID 47747 cb6889_c13/f1p0/2673<br>gnl BL_ORD_ID 14539 cb8564_c46562/f2p3/3196<br>isoform=cb8564_c46562;full_length_coverage=2;non_full_length_coverage=3;isoform_length=3196;expected_accuracy=0.995 | 330  | 2363 | 81   | 335  | 588  | 262<br>0 | 1    | 255      |
| isoform=cb8564_c178226;full_length_coverage=1;non_full_length_coverage=0;isoform_length=2728;expected                                           | gnl BL_ORD_ID 55866 cb8564_c47522/f1p0/2954                                                                                                                                                                    | 1284 | 2728 | 1    | 1288 | 1401 | 284<br>7 | 1    | 129<br>7 |

|                                                                                                                      |                                                                                                                     |      |      |      |      |      |     |      |      |   |
|----------------------------------------------------------------------------------------------------------------------|---------------------------------------------------------------------------------------------------------------------|------|------|------|------|------|-----|------|------|---|
| _accuracy=0.998                                                                                                      |                                                                                                                     |      |      |      |      |      |     |      |      |   |
| cb416_c19/flp0/2939                                                                                                  | gnl BL_ORD_ID 72149 cb416_c36/flp0/3277                                                                             | 11   | 1499 | 1494 | 2849 | 9    | 149 | 1636 | 299  |   |
| cb14220_c10/flp1/6717                                                                                                |                                                                                                                     |      |      |      |      |      | 9   |      | 7    |   |
| isoform=cb14220_c10;full_length_coverage=1;non_full_length_coverage=1;isoform_length=6717;expected_accuracy=0.993    | gnl BL_ORD_ID 63133 cb14220_c7/flp0/6933                                                                            | 2469 | 6717 | 133  | 2471 | 2660 | 692 | 6    | 235  | 1 |
| cb8564_c44123/flp1/3230                                                                                              | gnl BL_ORD_ID 55939 cb8564_c49630/flp4/3487                                                                         | 14   | 2911 | 2911 | 3161 | 12   | 291 | 3243 | 349  | 3 |
| cb8564_c178226/flp0/2728                                                                                             | gnl BL_ORD_ID 14368 cb8564_c34638/flp0/2817                                                                         |      |      |      |      |      |     |      |      |   |
| isoform=cb8564_c178226;full_length_coverage=1;non_full_length_coverage=0;isoform_length=2728;expected_accuracy=0.998 | isoform=cb8564_c34638;full_length_coverage=1;non_full_length_coverage=0;isoform_length=2817;expected_accuracy=0.992 | 1284 | 2728 | 1    | 1288 | 1388 | 281 | 1    | 128  | 4 |
| cb10054_c49/flp1/1123                                                                                                | gnl BL_ORD_ID 722 cb10054_c29/flp0/1317                                                                             |      |      |      |      |      |     |      |      |   |
| isoform=cb10054_c49;full_length_coverage=1;non_full_length_coverage=1;isoform_length=1123;expected_accuracy=1.000    | isoform=cb10054_c29;full_length_coverage=1;non_full_length_coverage=0;isoform_length=1317;expected_accuracy=0.994   | 258  | 1123 | 5    | 262  | 447  | 131 | 4    | 264  | 7 |
| cb8564_c41756/flp0/2738                                                                                              |                                                                                                                     |      |      |      |      |      |     |      |      |   |
| isoform=cb8564_c41756;full_length_coverage=1;non_full_length_coverage=0;isoform_length=2738;expected_accuracy=0.996  | gnl BL_ORD_ID 55962 cb8564_c50282/flp0/4402                                                                         | 15   | 2173 | 2170 | 2738 | 1457 | 361 | 3742 | 431  | 0 |
| cb5902_c2/flp0/2787                                                                                                  | gnl BL_ORD_ID 74623 cb5902_c0/flp0/2977                                                                             | 1    | 2521 | 2518 | 2775 | 73   | 259 | 2736 | 299  | 3 |
| cb8564_c53418/flp0/2602                                                                                              |                                                                                                                     |      |      |      |      |      | 8   |      |      |   |
| isoform=cb8564_c53418;full_length_coverage=1;non_full_length_coverage=0;isoform_length=2602;expected_                | gnl BL_ORD_ID 53915 cb8564_c14767/flp3/2856                                                                         | 1163 | 2499 | 1    | 1168 | 1268 | 260 | 1    | 1167 | 7 |

|                                                                                                                                                          |                                                                                                                                                                                  |     |      |      |      |     |          |      |          |
|----------------------------------------------------------------------------------------------------------------------------------------------------------|----------------------------------------------------------------------------------------------------------------------------------------------------------------------------------|-----|------|------|------|-----|----------|------|----------|
| accuracy=0.991<br>cb3228_c3/f1p0/2752<br>isoform=cb3228_c3;full_length_coverage=1;non_full_length_coverage=0;isoform_length=2752;expected_accuracy=0.997 | gnl BL_ORD_ID 70986 cb3228_c4/f1p0/4440                                                                                                                                          | 1   | 1663 | 1663 | 2648 | 33  | 169<br>7 | 3172 | 415<br>7 |
| cb12047_c134/f1p0/1727<br>isoform=cb12047_c134;full_length_coverage=1;non_full_length_coverage=0;isoform_length=1727;expected_accuracy=0.999             | gnl BL_ORD_ID 54487 cb8564_c124166/f1p0/2223                                                                                                                                     | 1   | 1006 | 1001 | 1716 | 22  | 102<br>7 | 1133 | 184<br>8 |
| cb3000_c3/f1p0/1940<br>isoform=cb3000_c3;full_length_coverage=1;non_full_length_coverage=0;isoform_length=1940;expected_accuracy=0.991                   | gnl BL_ORD_ID 36712                      cb3000_c1/f1p0/2248<br>isoform=cb3000_c1;full_length_coverage=1;non_full_length_coverage=0;isoform_length=2248;expected_accuracy=0.997  | 1   | 1186 | 1185 | 1940 | 7   | 1193     | 1312 | 207<br>4 |
| cb4174_c11/f2p0/2738<br>isoform=cb4174_c11;full_length_coverage=2;non_full_length_coverage=0;isoform_length=2738;expected_accuracy=1.000                 | gnl BL_ORD_ID 72312 cb4174_c3/f1p0/3410                                                                                                                                          | 1   | 2444 | 2444 | 2695 | 54  | 250<br>1 | 2899 | 314<br>9 |
| cb6391_c2/f2p0/2236<br>isoform=cb6391_c2;full_length_coverage=2;non_full_length_coverage=0;isoform_length=2236;expected_accuracy=0.998                   | gnl BL_ORD_ID 3495                      cb6391_c11/f1p0/2658<br>isoform=cb6391_c11;full_length_coverage=1;non_full_length_coverage=0;isoform_length=2658;expected_accuracy=0.993 | 225 | 2236 | 38   | 227  | 521 | 252<br>7 | 41   | 229      |
| cb737_c27/f1p0/4113<br>isoform=cb737_c27;full_length_coverage=1;non_full_length_coverage=0;isoform_length=4113;expected_accuracy=0.999                   | gnl BL_ORD_ID 49447 cb737_c20/f1p0/4370                                                                                                                                          | 1   | 3348 | 3347 | 4033 | 59  | 340<br>6 | 3563 | 425<br>2 |
| cb8564_c16431/f1p2/4911<br>isoform=cb8564_c16431;full_length_coverage=1;non_full_length_coverage=2;isoform_length=4911;expected_accuracy=0.999           | gnl BL_ORD_ID 64476 cb15140_c10/f1p1/5378                                                                                                                                        | 1   | 4785 | 4785 | 4911 | 312 | 509<br>3 | 5204 | 533<br>0 |

|                                                                                                                      |                                                                                                                     |                         |     |      |      |      |     |      |      |      |
|----------------------------------------------------------------------------------------------------------------------|---------------------------------------------------------------------------------------------------------------------|-------------------------|-----|------|------|------|-----|------|------|------|
| accuracy=0.991                                                                                                       |                                                                                                                     |                         |     |      |      |      |     |      |      |      |
| cb8564_c146029/f4p1/2251                                                                                             | gnl BL_ORD_ID 9245                                                                                                  | cb8564_c1146/f2p1/2474  |     |      |      |      |     |      |      |      |
| isoform=cb8564_c146029;full_length_coverage=4;non_full_length_coverage=1;isoform_length=2251;expected_accuracy=1.000 | isoform=cb8564_c1146;full_length_coverage=2;non_full_length_coverage=1;isoform_length=2474;expected_accuracy=0.996  |                         | 1   | 1259 | 1258 | 2250 | 1   | 1259 | 1482 | 2474 |
| cb8564_c36688/f1p0/3356                                                                                              | gnl BL_ORD_ID 16149                                                                                                 | cb8564_c47162/f1p0/3361 |     |      |      |      |     |      |      |      |
| isoform=cb8564_c36688;full_length_coverage=1;non_full_length_coverage=0;isoform_length=3356;expected_accuracy=0.996  | isoform=cb8564_c47162;full_length_coverage=1;non_full_length_coverage=0;isoform_length=3361;expected_accuracy=0.996 |                         | 402 | 3171 | 6    | 403  | 592 | 3361 | 4    | 402  |
| cb6406_c65/f1p0/1830                                                                                                 | gnl BL_ORD_ID 49694                                                                                                 | cb6406_c61/f1p0/2585    |     |      |      |      |     |      |      |      |
| isoform=cb6406_c65;full_length_coverage=1;non_full_length_coverage=0;isoform_length=1830;expected_accuracy=0.992     | isoform=cb6406_c61;full_length_coverage=1;non_full_length_coverage=0;isoform_length=2585;expected_accuracy=0.992    |                         | 1   | 1055 | 1051 | 1830 | 255 | 1310 | 1441 | 2221 |
| cb3999_c7/f1p0/2608                                                                                                  | gnl BL_ORD_ID 41059                                                                                                 | cb3999_c16/f1p0/2857    |     |      |      |      |     |      |      |      |
| isoform=cb3999_c7;full_length_coverage=1;non_full_length_coverage=0;isoform_length=2608;expected_accuracy=0.999      | isoform=cb3999_c16;full_length_coverage=1;non_full_length_coverage=0;isoform_length=2857;expected_accuracy=0.999    |                         | 1   | 2089 | 2086 | 2538 | 10  | 2098 | 2401 | 2857 |
| cb12931_c15/f1p0/1493                                                                                                | gnl BL_ORD_ID 55866                                                                                                 | cb8564_c47522/f1p0/2954 |     |      |      |      |     |      |      |      |
| isoform=cb12931_c15;full_length_coverage=1;non_full_length_coverage=0;isoform_length=1493;expected_accuracy=1.000    | isoform=cb8564_c47522;full_length_coverage=1;non_full_length_coverage=0;isoform_length=2954;expected_accuracy=1.000 |                         | 1   | 1106 | 1104 | 1492 | 1   | 1081 | 2461 | 2849 |
| cb10088_c29/f1p0/1009                                                                                                | gnl BL_ORD_ID 2975                                                                                                  | cb10088_c25/f1p3/1453   |     |      |      |      |     |      |      |      |
| isoform=cb10088_c29;full_length_coverage=1;non_full_length_coverage=0;isoform_length=1009;expected_accuracy=1.000    | isoform=cb10088_c25;full_length_coverage=1;non_full_length_coverage=3;isoform_length=1453;expected_accuracy=1.000   |                         | 442 | 1009 | 9    | 447  | 578 | 1145 | 1    | 439  |
| cb8227_c9/f1p1/1980                                                                                                  | gnl BL_ORD_ID 7454                                                                                                  | cb8227_c3/f1p1/2427     |     |      |      |      |     |      |      |      |
| isoform=cb8227_c9;full_length_coverage=1;non_full_length_coverage=0;isoform_length=1980;expected_accuracy=1.000      | isoform=cb8227_c3;full_length_coverage=1;non_full_length_coverage=0;isoform_length=2427;expected_accuracy=1.000     |                         | 202 | 1980 | 8    | 204  | 452 | 222  | 28   | 223  |



|                                                                                                                                                  |                                                                                                                                                                      |     |      |      |      |     |     |      |     |        |
|--------------------------------------------------------------------------------------------------------------------------------------------------|----------------------------------------------------------------------------------------------------------------------------------------------------------------------|-----|------|------|------|-----|-----|------|-----|--------|
| isoform=cb8227_c9;full_length_coverage=1;non_full_length_coverage=1;isoform_length=1980;expected_accuracy=0.993<br>cb8564_c119193/f1p2/2975      | isoform=cb8227_c3;full_length_coverage=1;non_full_length_coverage=1;isoform_length=2427;expected_accuracy=0.994                                                      |     |      |      |      |     |     |      |     | 9      |
| isoform=cb8564_c119193;full_length_coverage=1;non_full_length_coverage=2;isoform_length=2975;expected_accuracy=0.998<br>cb8564_c145668/f4p0/2444 | gnl BL_ORD_ID 55920 cb8564_c48949/f1p0/4357                                                                                                                          | 1   | 2308 | 2309 | 2975 | 2   | 229 | 2847 | 350 | 3<br>4 |
| isoform=cb8564_c145668;full_length_coverage=4;non_full_length_coverage=0;isoform_length=2444;expected_accuracy=1.000<br>cb5874_c30/f1p0/2210     | gnl BL_ORD_ID 15060 cb8564_c37490/f1p3/2627<br>isoform=cb8564_c37490;full_length_coverage=1;non_full_length_coverage=3;isoform_length=2627;expected_accuracy=0.998   | 1   | 2137 | 2137 | 2428 | 4   | 212 | 2245 | 253 | 4<br>4 |
| cb5874_c30/f1p0/2210                                                                                                                             | gnl BL_ORD_ID 44545 cb5874_c6/f8p0/2864<br>isoform=cb5874_c6;full_length_coverage=8;non_full_length_coverage=0;isoform_length=2864;expected_accuracy=1.000           | 145 | 2094 | 1    | 145  | 915 | 286 | 573  | 717 | 4      |
| cb7345_c8/f1p0/2440                                                                                                                              | gnl BL_ORD_ID 7283 cb7345_c20/f4p2/2585<br>isoform=cb7345_c20;full_length_coverage=4;non_full_length_coverage=2;isoform_length=2585;expected_accuracy=1.000          | 1   | 2257 | 2255 | 2440 | 3   | 227 | 2389 | 257 | 3<br>8 |
| cb8564_c40598/f1p4/3119                                                                                                                          | gnl BL_ORD_ID 54425 cb8564_c42906/f1p2/3181                                                                                                                          | 1   | 2732 | 2729 | 3054 | 1   | 270 | 2830 | 315 | 9<br>5 |
| cb8564_c187111/f1p0/2710                                                                                                                         | gnl BL_ORD_ID 10605 cb8564_c114675/f1p2/2937<br>isoform=cb8564_c114675;full_length_coverage=1;non_full_length_coverage=2;isoform_length=2937;expected_accuracy=0.998 | 404 | 2710 | 42   | 406  | 524 | 283 | 52   | 418 | 1      |
| cb8564_c37282/f1p0/4051                                                                                                                          | gnl BL_ORD_ID 56689 cb8564_c52534/f1p0/4439                                                                                                                          | 1   | 2281 | 2279 | 4003 | 8   | 228 | 2725 | 445 |        |

|                                                                                                                      |                     |                         |      |      |      |      |      |      |      |      |
|----------------------------------------------------------------------------------------------------------------------|---------------------|-------------------------|------|------|------|------|------|------|------|------|
|                                                                                                                      |                     |                         |      |      |      |      |      | 8    | 0    |      |
| cb8564_c180116/f1p0/2944                                                                                             |                     |                         |      |      |      |      |      |      |      |      |
| isoform=cb8564_c180116;full_length_coverage=1;non_full_length_coverage=0;isoform_length=2944;expected_accuracy=0.996 | gnl BL_ORD_ID 56275 | cb8564_c73216/f1p0/3006 | 25   | 2522 | 2520 | 2944 | 28   | 2499 | 2728 | 3152 |
| cb8881_c18/f1p0/1628                                                                                                 |                     |                         |      |      |      |      |      |      |      |      |
| isoform=cb8881_c18;full_length_coverage=1;non_full_length_coverage=0;isoform_length=1628;expected_accuracy=0.997     | gnl BL_ORD_ID 59335 | cb8881_c7/f1p0/1930     | 1    | 1226 | 1225 | 1621 | 2    | 1236 | 1591 | 1985 |
| cb8564_c80883/f1p0/3185                                                                                              |                     |                         |      |      |      |      |      |      |      |      |
| isoform=cb8564_c14618;full_length_coverage=5;non_full_length_coverage=1;isoform_length=3581;expected_accuracy=0.997  | gnl BL_ORD_ID 12496 | cb8564_c14618/f5p1/3581 | 1    | 2169 | 2166 | 3126 | 1    | 2168 | 2586 | 3548 |
| cb8564_c47209/f1p0/3227                                                                                              |                     |                         |      |      |      |      |      |      |      |      |
| isoform=cb8564_c23936;full_length_coverage=1;non_full_length_coverage=0;isoform_length=3016;expected_accuracy=0.995  | gnl BL_ORD_ID 14058 | cb8564_c23936/f1p0/3016 | 16   | 1738 | 1736 | 2606 | 11   | 1716 | 2143 | 3016 |
| cb1994_c0/f1p0/4099                                                                                                  |                     |                         |      |      |      |      |      |      |      |      |
| isoform=cb1994_c7;full_length_coverage=1;non_full_length_coverage=0;isoform_length=5227;expected_accuracy=0.998      | gnl BL_ORD_ID 35307 | cb1994_c7/f1p0/5227     | 2    | 2568 | 2565 | 3626 | 53   | 2622 | 4002 | 5069 |
| cb9471_c10/f1p0/1522                                                                                                 |                     |                         |      |      |      |      |      |      |      |      |
| isoform=cb9471_c10;full_length_coverage=1;non_full_length_coverage=0;isoform_length=1522;expected_accuracy=0.998     | gnl BL_ORD_ID 58743 | cb9471_c3/f1p0/2045     | 246  | 1522 | 3    | 251  | 488  | 1765 | 15   | 264  |
| cb8564_c146141/f1p6/2566                                                                                             |                     |                         |      |      |      |      |      |      |      |      |
|                                                                                                                      | gnl BL_ORD_ID 53954 | cb8564_c15976/f1p0/2695 | 1051 | 2502 | 1    | 1054 | 1158 | 260  | 2    | 105  |

|                                                                                                                       |                                                                                                                      |                          |     |      |      |      |     |      |           |
|-----------------------------------------------------------------------------------------------------------------------|----------------------------------------------------------------------------------------------------------------------|--------------------------|-----|------|------|------|-----|------|-----------|
| isoform=cb8564_c146141;full_length_coverage=10;non_full_length_coverage=6;isoform_length=2566;expected_accuracy=0.998 |                                                                                                                      |                          |     |      |      |      |     | 7    | 5         |
| cb6788_c3/f1p0/1918                                                                                                   | gnl BL_ORD_ID 6006                                                                                                   | cb6788_c0/f1p0/2764      |     |      |      |      |     |      |           |
| isoform=cb6788_c3;full_length_coverage=1;non_full_length_coverage=0;isoform_length=1918;expected_accuracy=1.000       | isoform=cb6788_c0;full_length_coverage=1;non_full_length_coverage=0;isoform_length=2764;expected_accuracy=0.992      |                          | 130 | 1902 | 1    | 131  | 985 | 2756 | 18 147    |
| cb8564_c23645/f1p0/2729                                                                                               | gnl BL_ORD_ID 17415                                                                                                  | cb8564_c9135/f13p0/2814  |     |      |      |      |     |      |           |
|                                                                                                                       | isoform=cb8564_c9135;full_length_coverage=13;non_full_length_coverage=0;isoform_length=2814;expected_accuracy=1.000  |                          | 1   | 2066 | 2062 | 2493 | 129 | 2195 | 2329 2760 |
| cb8564_c43119/f1p4/3194                                                                                               | gnl BL_ORD_ID 55164                                                                                                  | cb8564_c34296/f2p2/3371  |     |      |      |      |     |      |           |
| isoform=cb8564_c43119;full_length_coverage=1;non_full_length_coverage=4;isoform_length=3194;expected_accuracy=0.995   |                                                                                                                      |                          | 1   | 1671 | 1668 | 3157 | 7   | 1663 | 1805 3282 |
| cb15567_c9/f1p1/1733                                                                                                  | gnl BL_ORD_ID 11881                                                                                                  | cb8564_c148133/f2p1/1959 |     |      |      |      |     |      |           |
| isoform=cb15567_c9;full_length_coverage=1;non_full_length_coverage=1;isoform_length=1733;expected_accuracy=0.994      | isoform=cb8564_c148133;full_length_coverage=2;non_full_length_coverage=1;isoform_length=1959;expected_accuracy=1.000 |                          | 1   | 1626 | 1622 | 1733 | 1   | 1640 | 1753 1864 |
| cb8564_c45300/f1p4/3014                                                                                               | gnl BL_ORD_ID 56275                                                                                                  | cb8564_c73216/f1p0/3006  |     |      |      |      |     |      |           |
| isoform=cb8564_c45300;full_length_coverage=1;non_full_length_coverage=4;isoform_length=3014;expected_accuracy=0.996   |                                                                                                                      |                          | 243 | 3014 | 22   | 246  | 406 | 3154 | 28 249    |
| cb8564_c3679/f1p0/2936                                                                                                | gnl BL_ORD_ID 14164                                                                                                  | cb8564_c3676/f1p0/3441   |     |      |      |      |     |      |           |
|                                                                                                                       | isoform=cb8564_c3676;full_length_coverage=1;non_full_length_coverage=0;isoform_length=3441;expected_ac               |                          | 2   | 2346 | 2344 | 2646 | 68  | 2412 | 3139 3441 |

|                                                                                                                     |                                                                                                                     |      |      |      |      |      |      |      |      |     |
|---------------------------------------------------------------------------------------------------------------------|---------------------------------------------------------------------------------------------------------------------|------|------|------|------|------|------|------|------|-----|
|                                                                                                                     | curacy=0.997                                                                                                        |      |      |      |      |      |      |      |      |     |
| cb8564_c22212/f1p0/2530                                                                                             |                                                                                                                     |      |      |      |      |      |      |      |      |     |
| isoform=cb8564_c22212;full_length_coverage=1;non_full_length_coverage=0;isoform_length=2530;expected_accuracy=0.992 | gnl BL_ORD_ID 55945 cb8564_c49862/f1p0/2807                                                                         | 1    | 2118 | 2113 | 2530 | 1    | 2117 | 2234 | 265  | 1   |
| cb8564_c79084/f1p0/2498                                                                                             | gnl BL_ORD_ID 15486 cb8564_c69975/f1p0/2818                                                                         |      |      |      |      |      |      |      |      |     |
| isoform=cb8564_c79084;full_length_coverage=1;non_full_length_coverage=0;isoform_length=2498;expected_accuracy=0.991 | isoform=cb8564_c69975;full_length_coverage=1;non_full_length_coverage=0;isoform_length=2818;expected_accuracy=0.999 | 133  | 2451 | 1    | 133  | 494  | 281  | 8    | 1    | 134 |
| cb12931_c15/f1p0/1493                                                                                               |                                                                                                                     |      |      |      |      |      |      |      |      |     |
| isoform=cb12931_c15;full_length_coverage=1;non_full_length_coverage=0;isoform_length=1493;expected_accuracy=1.000   | gnl BL_ORD_ID 56727 cb8564_c66920/f3p3/2894                                                                         | 1    | 1106 | 1104 | 1485 | 1    | 1102 | 2482 | 286  | 3   |
| cb8349_c32/f1p0/2256                                                                                                | gnl BL_ORD_ID 9633 cb8349_c50/f2p0/3005                                                                             |      |      |      |      |      |      |      |      |     |
| isoform=cb8349_c32;full_length_coverage=1;non_full_length_coverage=0;isoform_length=2256;expected_accuracy=0.994    | isoform=cb8349_c50;full_length_coverage=2;non_full_length_coverage=0;isoform_length=3005;expected_accuracy=1.000    | 1    | 1203 | 1202 | 2161 | 27   | 122  | 9    | 1921 | 288 |
|                                                                                                                     | gnl BL_ORD_ID 14531 cb8564_c41778/f1p9/3482                                                                         |      |      |      |      |      |      |      |      |     |
| cb8564_c89122/f1p0/3335                                                                                             | isoform=cb8564_c41778;full_length_coverage=1;non_full_length_coverage=9;isoform_length=3482;expected_accuracy=0.992 | 302  | 2913 | 81   | 306  | 812  | 342  | 6    | 21   | 247 |
|                                                                                                                     | gnl BL_ORD_ID 18764 cb8564_c84695/f1p1/2710                                                                         |      |      |      |      |      |      |      |      |     |
| cb8564_c21439/f1p0/2587                                                                                             | isoform=cb8564_c84695;full_length_coverage=1;non_full_length_coverage=1;isoform_length=2710;expected_accuracy=0.998 | 1226 | 2542 | 1    | 1228 | 1350 | 266  | 4    | 1    | 122 |
|                                                                                                                     | gnl BL_ORD_ID 37671 cb2552_c2/f1p0/2173                                                                             |      |      |      |      |      |      |      |      |     |
| cb2552_c5/f1p0/1147                                                                                                 |                                                                                                                     | 284  | 1147 | 3    | 283  | 1163 | 202  | 1    | 1    | 281 |

|                                                                                                                 |                                                                                                                                                                           |     |      |      |      |     |          |      |          |   |
|-----------------------------------------------------------------------------------------------------------------|---------------------------------------------------------------------------------------------------------------------------------------------------------------------------|-----|------|------|------|-----|----------|------|----------|---|
| isoform=cb2552_c5;full_length_coverage=1;non_full_length_coverage=0;isoform_length=1147;expected_accuracy=0.994 | isoform=cb2552_c2;full_length_coverage=1;non_full_length_coverage=0;isoform_length=2173;expected_accuracy=1.000                                                           |     |      |      |      |     |          |      |          | 4 |
| cb8564_c126213/f1p0/1904                                                                                        | gnl BL_ORD_ID 11817      cb8564_c146446/f7p1/2026<br>isoform=cb8564_c146446;full_length_coverage=7;non_full_length_coverage=1;isoform_length=2026;expected_accuracy=1.000 | 1   | 1585 | 1586 | 1779 | 59  | 164<br>2 | 1833 | 202<br>6 |   |
| cb8564_c90372/f1p0/2157                                                                                         | gnl BL_ORD_ID 53232      cb8564_c119499/f1p2/2534<br>isoform=cb8564_c90372;full_length_coverage=1;non_full_length_coverage=0;isoform_length=2157;expected_accuracy=0.994  | 1   | 1092 | 1088 | 2091 | 92  | 1184     | 1356 | 235<br>9 |   |
| cb3586_c11/f1p0/2822                                                                                            | gnl BL_ORD_ID 41151      cb3586_c0/f4p0/3057<br>isoform=cb3586_c11;full_length_coverage=1;non_full_length_coverage=0;isoform_length=2822;expected_accuracy=0.995          | 278 | 2822 | 1    | 277  | 498 | 305<br>6 | 76   | 349      |   |
| cb2882_c1/f1p0/3506                                                                                             | gnl BL_ORD_ID 37087      cb2882_c0/f1p0/3780<br>isoform=cb2882_c1;full_length_coverage=1;non_full_length_coverage=0;isoform_length=3506;expected_accuracy=0.998           | 2   | 2608 | 2608 | 3506 | 104 | 270<br>8 | 2853 | 375<br>1 |   |
| cb7076_c17/f1p1/2296                                                                                            | gnl BL_ORD_ID 4463      cb7076_c12/f1p1/2435<br>isoform=cb7076_c17;full_length_coverage=11;non_full_length_coverage=1;isoform_length=2296;expected_accuracy=0.997         | 1   | 1637 | 1636 | 2296 | 1   | 163<br>7 | 1764 | 242<br>4 |   |
| cb12714_c29/f1p2/1583                                                                                           | gnl BL_ORD_ID 53904      cb8564_c14267/f1p3/2584<br>isoform=cb12714_c29;full_length_coverage=1;non_full_length_coverage=0;isoform_length=1583;expected_accuracy=0.999     | 1   | 1296 | 1293 | 1588 | 3   | 129<br>8 | 2283 | 257<br>8 |   |
| cb8564_c17892/f1p0/3277                                                                                         | gnl BL_ORD_ID 56666      cb8564_c51678/f1p0/3945<br>isoform=cb8564_c17892;full_length_coverage=1;non_full_length_coverage=0;isoform_length=3277;expected_accuracy=0.999   | 200 | 3271 | 2    | 201  | 573 | 364      | 2    | 201      |   |

|                                                                                                                     |                                                                                                                      |                          |     |      |      |      |     |      |      |      |
|---------------------------------------------------------------------------------------------------------------------|----------------------------------------------------------------------------------------------------------------------|--------------------------|-----|------|------|------|-----|------|------|------|
| cb8564_c36056/f1p0/2652                                                                                             | gnl BL_ORD_ID 13273                                                                                                  | cb8564_c188193/f1p0/2849 |     |      |      |      |     | 3    |      |      |
| isoform=cb8564_c36056;full_length_coverage=1;non_full_length_coverage=0;isoform_length=2652;expected_accuracy=0.999 | isoform=cb8564_c188193;full_length_coverage=1;non_full_length_coverage=0;isoform_length=2849;expected_accuracy=0.997 |                          | 248 | 2651 | 1    | 251  | 466 | 2849 | 70   | 322  |
| cb3354_c1/f2p0/1541                                                                                                 | gnl BL_ORD_ID 40592                                                                                                  | cb3354_c3/f1p0/2584      |     |      |      |      |     |      |      |      |
| isoform=cb3354_c1;full_length_coverage=2;non_full_length_coverage=0;isoform_length=1541;expected_accuracy=1.000     | isoform=cb3354_c3;full_length_coverage=1;non_full_length_coverage=0;isoform_length=2584;expected_accuracy=0.999      |                          | 1   | 1184 | 1184 | 1541 | 29  | 1213 | 2093 | 2450 |
| cb401_c28/f1p0/2163                                                                                                 | gnl BL_ORD_ID 41314                                                                                                  | cb401_c156/f16p0/2365    |     |      |      |      |     |      |      |      |
| isoform=cb401_c28;full_length_coverage=1;non_full_length_coverage=0;isoform_length=2163;expected_accuracy=0.992     | isoform=cb401_c156;full_length_coverage=16;non_full_length_coverage=0;isoform_length=2365;expected_accuracy=1.000    |                          | 317 | 2139 | 8    | 313  | 553 | 2364 | 36   | 342  |
| cb295_c26/f1p1/1869                                                                                                 | gnl BL_ORD_ID 36693                                                                                                  | cb295_c32/f1p2/2147      |     |      |      |      |     |      |      |      |
|                                                                                                                     | isoform=cb295_c32;full_length_coverage=1;non_full_length_coverage=2;isoform_length=2147;expected_accuracy=0.991      |                          | 1   | 1359 | 1358 | 1857 | 3   | 1380 | 1512 | 2016 |
| cb17884_c0/f3p1/1879                                                                                                | gnl BL_ORD_ID 11567                                                                                                  | cb8564_c125919/f1p0/2530 |     |      |      |      |     |      |      |      |
| isoform=cb17884_c0;full_length_coverage=3;non_full_length_coverage=1;isoform_length=1879;expected_accuracy=1.000    | isoform=cb8564_c125919;full_length_coverage=1;non_full_length_coverage=0;isoform_length=2530;expected_accuracy=1.000 |                          | 252 | 1879 | 68   | 253  | 901 | 2528 | 52   | 239  |
| cb11941_c13/f1p0/1210                                                                                               | gnl BL_ORD_ID 24140                                                                                                  | cb11941_c6/f2p1/1361     |     |      |      |      |     |      |      |      |
|                                                                                                                     | isoform=cb11941_c6;full_length_coverage=2;non_full_length_coverage=1;isoform_length=1361;expected_accuracy=0.999     |                          | 166 | 1177 | 9    | 167  | 326 | 1361 | 1    | 159  |
| cb8564_c86152/f1p2/2957                                                                                             | gnl BL_ORD_ID 15620                                                                                                  | cb8564_c69210/f3p3/3290  |     |      |      |      |     |      |      |      |
|                                                                                                                     |                                                                                                                      |                          | 115 | 2955 | 1    | 114  | 450 | 329  | 226  | 339  |



|                                                                                                                                                              |                                                                                                                                                                                         |     |      |      |      |     |      |      |      |
|--------------------------------------------------------------------------------------------------------------------------------------------------------------|-----------------------------------------------------------------------------------------------------------------------------------------------------------------------------------------|-----|------|------|------|-----|------|------|------|
| racy=0.996<br>cb8564_c40764/f1p0/2563<br>isoform=cb8564_c40764;full_length_coverage=1;non_full_length_coverage=0;isoform_length=2563;expected_accuracy=0.997 | gnl BL_ORD_ID 55986 cb8564_c51172/f1p0/3367                                                                                                                                             | 2   | 2166 | 2162 | 2563 | 7   | 2185 | 2393 | 2794 |
| cb10846_c1/f1p0/1856                                                                                                                                         | gnl BL_ORD_ID 48905 cb10846_c4/f1p0/2641                                                                                                                                                | 1   | 1491 | 1490 | 1809 | 41  | 1531 | 2094 | 2413 |
| cb4657_c15/f1p0/4478<br>isoform=cb4657_c15;full_length_coverage=1;non_full_length_coverage=0;isoform_length=4478;expected_accuracy=0.997                     | gnl BL_ORD_ID 42493                      cb4657_c10/f1p0/4691<br>isoform=cb4657_c10;full_length_coverage=1;non_full_length_coverage=0;isoform_length=4691;expected_accuracy=0.994       | 350 | 4478 | 130  | 351  | 576 | 4691 | 1    | 222  |
| cb6829_c4/f2p1/2198<br>isoform=cb6829_c4;full_length_coverage=2;non_full_length_coverage=1;isoform_length=2198;expected_accuracy=0.997                       | gnl BL_ORD_ID 4297                      cb6829_c1/f6p2/2641<br>isoform=cb6829_c1;full_length_coverage=6;non_full_length_coverage=2;isoform_length=2641;expected_accuracy=1.000          | 1   | 1838 | 1838 | 2198 | 22  | 1854 | 2278 | 2638 |
| cb8564_c188097/f1p0/2552<br>isoform=cb8564_c188097;full_length_coverage=1;non_full_length_coverage=0;isoform_length=2552;expected_accuracy=0.996             | gnl BL_ORD_ID 17008                      cb8564_c55271/f1p4/2648<br>isoform=cb8564_c55271;full_length_coverage=1;non_full_length_coverage=4;isoform_length=2648;expected_accuracy=0.998 | 1   | 1945 | 1940 | 2499 | 2   | 1958 | 2061 | 2616 |
| cb2737_c42/f1p0/2881                                                                                                                                         | gnl BL_ORD_ID 38132                      cb2737_c20/f1p0/3644<br>isoform=cb2737_c20;full_length_coverage=1;non_full_length_coverage=0;isoform_length=3644;expected_accuracy=0.998       | 1   | 1427 | 1425 | 2632 | 852 | 2278 | 2410 | 3596 |
| cb8564_c69975/f1p0/2818<br>isoform=cb8564_c69975;full_length_coverage=1;non_full_length_coverage=0;isoform_length=2818;expected_                             | gnl BL_ORD_ID 57373 cb8564_c91193/f1p0/3331                                                                                                                                             | 260 | 2818 | 15   | 259  | 465 | 3023 | 58   | 303  |



|                                                                                                                                                                |                                                                                                                                                                     |     |      |      |      |     |      |      |      |
|----------------------------------------------------------------------------------------------------------------------------------------------------------------|---------------------------------------------------------------------------------------------------------------------------------------------------------------------|-----|------|------|------|-----|------|------|------|
| accuracy=0.999<br>cb8564_c4645/f1p1/2620<br>isoform=cb8564_c4645;full_length_coverage=1;non_full_length_coverage=1;isoform_length=2620;expected_accuracy=0.994 | gnl BL_ORD_ID 56319 cb8564_c74283/f1p0/3024                                                                                                                         | 1   | 1828 | 1829 | 2545 | 12  | 1850 | 1974 | 2688 |
| cb396_c57/f1p0/2029<br>isoform=cb396_c57;full_length_coverage=1;non_full_length_coverage=0;isoform_length=2029;expected_accuracy=0.995                         | gnl BL_ORD_ID 39231 cb396_c67/f28p0/2542<br>isoform=cb396_c67;full_length_coverage=28;non_full_length_coverage=0;isoform_length=2542;expected_accuracy=1.000        | 1   | 1399 | 1395 | 2029 | 70  | 1469 | 1730 | 2365 |
| cb8564_c14280/f1p0/2385                                                                                                                                        | gnl BL_ORD_ID 10074 cb8564_c11613/f1p0/2758<br>isoform=cb8564_c11613;full_length_coverage=1;non_full_length_coverage=0;isoform_length=2758;expected_accuracy=0.991  | 1   | 2052 | 2050 | 2355 | 254 | 2346 | 2447 | 2758 |
| cb8564_c50151/f1p0/3198<br>isoform=cb8564_c50151;full_length_coverage=1;non_full_length_coverage=0;isoform_length=3198;expected_accuracy=0.995                 | gnl BL_ORD_ID 16149 cb8564_c47162/f1p0/3361<br>isoform=cb8564_c47162;full_length_coverage=1;non_full_length_coverage=0;isoform_length=3361;expected_accuracy=0.996  | 405 | 3198 | 6    | 406  | 592 | 3361 | 1    | 402  |
| cb5137_c91/f1p0/3100                                                                                                                                           | gnl BL_ORD_ID 42185 cb5137_c56/f1p0/3071<br>isoform=cb5137_c56;full_length_coverage=1;non_full_length_coverage=0;isoform_length=3071;expected_accuracy=0.991        | 128 | 2800 | 1    | 132  | 398 | 3071 | 4    | 135  |
| cb8564_c118910/f1p0/3194<br>isoform=cb8564_c118910;full_length_coverage=1;non_full_length_coverage=0;isoform_length=3194;expected_accuracy=0.996               | gnl BL_ORD_ID 9479 cb8564_c115532/f1p0/3955<br>isoform=cb8564_c115532;full_length_coverage=1;non_full_length_coverage=0;isoform_length=3955;expected_accuracy=0.998 | 129 | 2906 | 2905 | 3194 | 1   | 2782 | 3557 | 3847 |
| cb8564_c145318/f1p3/1986                                                                                                                                       | gnl BL_ORD_ID 13510 cb8564_c1931/f2p1/2498                                                                                                                          | 1   | 1191 | 1190 | 1985 | 1   | 121  | 1708 | 249  |

|                                                                                                                                                  |                                                                                                                                                                    |     |      |      |      |      |          |      |  |          |
|--------------------------------------------------------------------------------------------------------------------------------------------------|--------------------------------------------------------------------------------------------------------------------------------------------------------------------|-----|------|------|------|------|----------|------|--|----------|
| isoform=cb8564_c145318;full_length_coverage=11;non_full_length_coverage=3;isoform_length=1986;expected_accuracy=1.000<br>cb8564_c41507/f1p0/2100 | isoform=cb8564_c1931;full_length_coverage=2;non_full_length_coverage=1;isoform_length=2498;expected_accuracy=1.000                                                 |     |      |      |      |      |          | 0    |  | 8        |
| isoform=cb8564_c41507;full_length_coverage=1;non_full_length_coverage=0;isoform_length=2100;expected_accuracy=0.998<br>cb4746_c4/f1p0/2536       | gnl BL_ORD_ID 55161 cb8564_c34270/f1p0/4482                                                                                                                        | 1   | 1657 | 1655 | 2100 | 1853 | 351<br>2 | 3900 |  | 434<br>6 |
| isoform=cb4746_c4;full_length_coverage=1;non_full_length_coverage=0;isoform_length=2536;expected_accuracy=0.996                                  | gnl BL_ORD_ID 72931 cb4746_c3/f1p0/3262                                                                                                                            | 10  | 1457 | 1456 | 2536 | 1    | 145<br>4 | 2180 |  | 326<br>4 |
| cb5633_c36/f1p3/2709                                                                                                                             | gnl BL_ORD_ID 45725 cb5633_c20/f1p1/2973<br>isoform=cb5633_c20;full_length_coverage=1;non_full_length_coverage=1;isoform_length=2973;expected_accuracy=0.994       | 1   | 1964 | 1959 | 2640 | 29   | 199<br>1 | 2292 |  | 297<br>3 |
| cb8564_c12805/f1p0/2580                                                                                                                          | gnl BL_ORD_ID 18962 cb8564_c79723/f1p6/3025<br>isoform=cb8564_c79723;full_length_coverage=1;non_full_length_coverage=6;isoform_length=3025;expected_accuracy=0.999 | 1   | 1695 | 1690 | 2564 | 211  | 190<br>6 | 2148 |  | 302<br>5 |
| cb2889_c9/f1p0/3389                                                                                                                              | gnl BL_ORD_ID 36509 cb2889_c3/f1p0/3455<br>isoform=cb2889_c3;full_length_coverage=1;non_full_length_coverage=0;isoform_length=3455;expected_accuracy=0.992         | 722 | 3389 | 93   | 722  | 769  | 342<br>5 | 1    |  | 634      |
| cb8564_c43399/f1p0/2654                                                                                                                          | gnl BL_ORD_ID 55395 cb8564_c40401/f1p4/2799                                                                                                                        | 1   | 2367 | 2363 | 2653 | 1    | 236<br>0 | 2500 |  | 279<br>0 |

|                                                                                                                     |                                                                                                                     |                          |      |      |      |      |      |      |      |      |  |
|---------------------------------------------------------------------------------------------------------------------|---------------------------------------------------------------------------------------------------------------------|--------------------------|------|------|------|------|------|------|------|------|--|
| accuracy=0.999                                                                                                      |                                                                                                                     |                          |      |      |      |      |      |      |      |      |  |
| cb8564_c36635/f1p0/4030                                                                                             | gnl BL_ORD_ID 13890                                                                                                 | cb8564_c35935/f1p0/4149  |      |      |      |      |      |      |      |      |  |
| isoform=cb8564_c36635;full_length_coverage=1;non_full_length_coverage=0;isoform_length=4030;expected_accuracy=0.998 | isoform=cb8564_c35935;full_length_coverage=1;non_full_length_coverage=0;isoform_length=4149;expected_accuracy=0.993 |                          | 184  | 4021 | 1    | 189  | 332  | 4149 | 1    | 188  |  |
| cb8564_c111706/f1p0/2253                                                                                            | gnl BL_ORD_ID 54594                                                                                                 | cb8564_c127479/f1p0/2956 | 1    | 1681 | 1678 | 2121 | 170  | 1850 | 2141 | 2584 |  |
| cb2225_c5/f1p0/3503                                                                                                 | gnl BL_ORD_ID 38889                                                                                                 | cb2225_c11/f2p0/3660     |      |      |      |      |      |      |      |      |  |
| isoform=cb2225_c5;full_length_coverage=1;non_full_length_coverage=0;isoform_length=3503;expected_accuracy=0.997     | isoform=cb2225_c11;full_length_coverage=2;non_full_length_coverage=0;isoform_length=3660;expected_accuracy=1.000    |                          | 1    | 3136 | 3136 | 3503 | 19   | 3157 | 3291 | 3658 |  |
| cb541_c24/f1p0/5418                                                                                                 | gnl BL_ORD_ID 44621                                                                                                 | cb541_c27/f1p1/5706      |      |      |      |      |      |      |      |      |  |
| isoform=cb541_c24;full_length_coverage=1;non_full_length_coverage=0;isoform_length=5418;expected_accuracy=0.993     | isoform=cb541_c27;full_length_coverage=1;non_full_length_coverage=1;isoform_length=5706;expected_accuracy=0.993     |                          | 3    | 4102 | 4103 | 5418 | 3    | 4114 | 4244 | 5559 |  |
| cb1065_c16/f1p0/2119                                                                                                | gnl BL_ORD_ID 242                                                                                                   | cb1065_c2/f5p0/2384      |      |      |      |      |      |      |      |      |  |
|                                                                                                                     | isoform=cb1065_c2;full_length_coverage=5;non_full_length_coverage=0;isoform_length=2384;expected_accuracy=1.000     |                          | 1014 | 2113 | 1    | 1015 | 1286 | 2384 | 4    | 1023 |  |
| cb5897_c2/f1p0/2053                                                                                                 | gnl BL_ORD_ID 46292                                                                                                 | cb5897_c5/f1p0/2583      |      |      |      |      |      |      |      |      |  |
| isoform=cb5897_c2;full_length_coverage=1;non_full_length_coverage=0;isoform_length=2053;expected_accuracy=0.998     | isoform=cb5897_c5;full_length_coverage=1;non_full_length_coverage=0;isoform_length=2583;expected_accuracy=0.994     |                          | 1    | 1430 | 1429 | 1978 | 1    | 1434 | 2034 | 2583 |  |
| cb10297_c2/f1p0/1900                                                                                                | gnl BL_ORD_ID 48347                                                                                                 | cb10297_c4/f1p0/2035     |      |      |      |      |      |      |      |      |  |
|                                                                                                                     |                                                                                                                     |                          | 1    | 1173 | 1173 | 1618 | 35   | 1207 | 1357 | 1802 |  |
| cb8564_c39136/f1p0/3036                                                                                             | gnl BL_ORD_ID 14091                                                                                                 | cb8564_c43119/f1p4/3194  |      |      |      |      |      |      |      |      |  |
|                                                                                                                     |                                                                                                                     |                          | 1    | 2089 | 2085 | 2997 | 1    | 2110 | 2237 | 315  |  |

|                                                                                                                     |                                                                                                                                                                          |     |      |      |      |      |      |      |      |  |  |   |
|---------------------------------------------------------------------------------------------------------------------|--------------------------------------------------------------------------------------------------------------------------------------------------------------------------|-----|------|------|------|------|------|------|------|--|--|---|
| isoform=cb8564_c39136;full_length_coverage=1;non_full_length_coverage=0;isoform_length=3036;expected_accuracy=0.998 | isoform=cb8564_c43119;full_length_coverage=1;non_full_length_coverage=4;isoform_length=3194;expected_accuracy=0.995                                                      |     |      |      |      |      |      |      |      |  |  | 7 |
| cb8564_c2150/f1p0/2358                                                                                              | gnl BL_ORD_ID 9520      cb8564_c107219/f7p1/2625<br>isoform=cb8564_c107219;full_length_coverage=7;non_full_length_coverage=1;isoform_length=2625;expected_accuracy=1.000 | 1   | 2130 | 2130 | 2378 | 67   | 2196 | 2324 | 2572 |  |  |   |
| cb2102_c21/f5p3/2180                                                                                                | gnl BL_ORD_ID 35266      cb2102_c6/f1p1/3538<br>isoform=cb2102_c6;full_length_coverage=1;non_full_length_coverage=1;isoform_length=3538;expected_accuracy=0.997          | 1   | 1770 | 1768 | 2180 | 4    | 1778 | 2523 | 2935 |  |  |   |
| cb595_c15/f1p0/3791                                                                                                 | gnl BL_ORD_ID 72285      cb595_c22/f1p0/5464                                                                                                                             | 2   | 2284 | 2284 | 3915 | 3    | 2285 | 3145 | 4776 |  |  |   |
| cb1459_c0/f8p1/1395                                                                                                 | gnl BL_ORD_ID 63631      cb1459_c2/f1p1/4317                                                                                                                             | 575 | 1376 | 6    | 577  | 3502 | 4304 | 3    | 576  |  |  |   |
| cb4544_c8/f1p0/2838                                                                                                 | gnl BL_ORD_ID 71947      cb4544_c11/f1p0/2935                                                                                                                            | 16  | 1633 | 1634 | 2599 | 1    | 1632 | 1911 | 2877 |  |  |   |
| cb7308_c0/f3p1/1955                                                                                                 | gnl BL_ORD_ID 8226      cb7308_c7/f1p1/2094<br>isoform=cb7308_c7;full_length_coverage=1;non_full_length_coverage=1;isoform_length=2094;expected_accuracy=0.994           | 1   | 1577 | 1576 | 1954 | 5    | 1578 | 1716 | 2094 |  |  |   |
| cb8564_c19992/f1p2/4274                                                                                             | gnl BL_ORD_ID 13353      cb8564_c22284/f1p2/4673<br>isoform=cb8564_c22284;full_length_coverage=1;non_full_length_coverage=2;isoform_length=4673;expected_ac              | 3   | 3249 | 3247 | 4146 | 13   | 3256 | 3775 | 4673 |  |  |   |

|                                                                                                                      |                                                                                                                      |     |      |      |      |      |          |      |          |  |
|----------------------------------------------------------------------------------------------------------------------|----------------------------------------------------------------------------------------------------------------------|-----|------|------|------|------|----------|------|----------|--|
|                                                                                                                      | curacy=0.996                                                                                                         |     |      |      |      |      |          |      |          |  |
| cb8564_c1332/f1p0/2677                                                                                               | gnl BL_ORD_ID 52636 cb8564_c1322/f1p1/4079                                                                           | 300 | 2717 | 7    | 304  | 1605 | 401<br>5 | 2    | 304      |  |
| cb1666_c2/f2p0/2331                                                                                                  | gnl BL_ORD_ID 33315 cb1666_c5/f1p3/2503                                                                              |     |      |      |      |      |          |      |          |  |
| isoform=cb1666_c2;full_length_coverage=2;non_full_length_coverage=0;isoform_length=2331;expected_accuracy=1.000      | isoform=cb1666_c5;full_length_coverage=1;non_full_length_coverage=3;isoform_length=2503;expected_accuracy=0.995      | 1   | 2214 | 2211 | 2331 | 18   | 222<br>5 | 2337 | 245<br>6 |  |
| cb99_c12/f1p0/3017                                                                                                   | gnl BL_ORD_ID 20897 cb99_c11/f1p1/3412                                                                               |     |      |      |      |      |          |      |          |  |
| isoform=cb99_c12;full_length_coverage=1;non_full_length_coverage=0;isoform_length=3017;expected_accuracy=0.997       | isoform=cb99_c11;full_length_coverage=1;non_full_length_coverage=1;isoform_length=3412;expected_accuracy=0.999       | 1   | 2761 | 2758 | 3017 | 198  | 296<br>1 | 3152 | 340<br>8 |  |
| cb8564_c121616/f1p1/2723                                                                                             | gnl BL_ORD_ID 11141 cb8564_c109409/f3p1/2839                                                                         |     |      |      |      |      |          |      |          |  |
|                                                                                                                      | isoform=cb8564_c109409;full_length_coverage=3;non_full_length_coverage=1;isoform_length=2839;expected_accuracy=0.995 | 1   | 2193 | 2193 | 2679 | 40   | 223<br>3 | 2347 | 283<br>2 |  |
| cb8564_c15230/f1p0/1944                                                                                              | gnl BL_ORD_ID 16530 cb8564_c54668/f1p8/2639                                                                          |     |      |      |      |      |          |      |          |  |
|                                                                                                                      | isoform=cb8564_c54668;full_length_coverage=1;non_full_length_coverage=8;isoform_length=2639;expected_accuracy=0.999  | 352 | 1901 | 50   | 357  | 1091 | 263<br>8 | 67   | 381      |  |
| cb10058_c1/f1p0/1620                                                                                                 | gnl BL_ORD_ID 48005 cb10058_c3/f1p0/1884                                                                             |     |      |      |      |      |          |      |          |  |
|                                                                                                                      |                                                                                                                      | 1   | 1049 | 1048 | 1486 | 65   | 1114     | 1326 | 176<br>3 |  |
| cb8564_c154552/f1p5/2566                                                                                             | gnl BL_ORD_ID 53584 cb8564_c129387/f1p0/3201                                                                         |     |      |      |      |      |          |      |          |  |
| isoform=cb8564_c154552;full_length_coverage=1;non_full_length_coverage=5;isoform_length=2566;expected_accuracy=0.995 |                                                                                                                      | 1   | 1941 | 1941 | 2566 | 12   | 194<br>9 | 2178 | 280<br>7 |  |
| cb7189_c8/f1p0/2376                                                                                                  | gnl BL_ORD_ID 50408 cb7189_c7/f1p1/2301                                                                              |     |      |      |      |      |          |      |          |  |
|                                                                                                                      |                                                                                                                      | 1   | 1304 | 1304 | 2063 | 319  | 162      | 1517 | 227      |  |

|                          |                     |                          |     |      |      |      |     |      |      |      |
|--------------------------|---------------------|--------------------------|-----|------|------|------|-----|------|------|------|
|                          |                     |                          |     |      |      |      |     | 2    | 6    |      |
| cb4487_c11/f1p0/2408     | gnl BL_ORD_ID 72597 | cb4487_c10/f1p0/2515     | 1   | 1748 | 1748 | 2379 | 38  | 1785 | 1889 | 2520 |
| cb8564_c81040/f1p1/2371  | gnl BL_ORD_ID 58157 | cb8564_c90169/f1p0/2658  | 10  | 1965 | 1962 | 2475 | 1   | 1956 | 2161 | 2655 |
| cb8564_c51661/f1p0/3132  | gnl BL_ORD_ID 13424 | cb8564_c19032/f4p0/3378  | 1   | 2104 | 2099 | 3077 | 23  | 2127 | 2284 | 3262 |
| cb8564_c23378/f1p1/2211  | gnl BL_ORD_ID 13799 | cb8564_c22358/f1p1/4124  | 1   | 1684 | 1684 | 2195 | 1   | 1676 | 1830 | 2341 |
| cb8564_c118488/f1p0/2066 | gnl BL_ORD_ID 11866 | cb8564_c126236/f1p0/2200 | 198 | 2024 | 11   | 202  | 366 | 2198 | 1    | 184  |
| cb8564_c165050/f2p1/2091 | gnl BL_ORD_ID 12527 | cb8564_c15023/f2p0/2552  | 1   | 1672 | 1673 | 2091 | 1   | 1674 | 2137 | 2550 |
| cb9943_c0/f2p1/1899      | gnl BL_ORD_ID 20471 | cb9943_c3/f1p0/2123      | 1   | 1498 | 1495 | 1820 | 1   | 1498 | 1798 | 2123 |
| cb8564_c46939/f1p1/2926  | gnl BL_ORD_ID 16447 | cb8564_c47202/f1p0/3195  | 1   | 2134 | 2130 | 2856 | 1   | 214  | 2249 | 297  |

|                                                                                                                      |                                                                                                                     |      |      |      |      |      |      |      |      |
|----------------------------------------------------------------------------------------------------------------------|---------------------------------------------------------------------------------------------------------------------|------|------|------|------|------|------|------|------|
|                                                                                                                      | isoform=cb8564_c47202;full_length_coverage=1;non_full_length_coverage=0;isoform_length=3195;expected_accuracy=0.996 |      |      |      |      |      |      | 4    | 6    |
| cb8564_c180116/f1p0/2944                                                                                             |                                                                                                                     |      |      |      |      |      |      |      |      |
| isoform=cb8564_c180116;full_length_coverage=1;non_full_length_coverage=0;isoform_length=2944;expected_accuracy=0.996 | gnl BL_ORD_ID 55334 cb8564_c38684/f1p1/3241                                                                         | 1    | 2522 | 2520 | 2942 | 2    | 2520 | 2825 | 3247 |
| cb6730_c3/f4p0/2261                                                                                                  | gnl BL_ORD_ID 5878 cb6730_c6/f2p1/2515                                                                              |      |      |      |      |      |      |      |      |
| isoform=cb6730_c3;full_length_coverage=4;non_full_length_coverage=0;isoform_length=2261;expected_accuracy=1.000      | isoform=cb6730_c6;full_length_coverage=2;non_full_length_coverage=1;isoform_length=2515;expected_accuracy=0.994     | 1    | 1673 | 1674 | 2261 | 24   | 1696 | 1877 | 2465 |
| cb332_c3/f1p1/4544                                                                                                   | gnl BL_ORD_ID 39700 cb332_c11/f1p0/5243                                                                             |      |      |      |      |      |      |      |      |
| isoform=cb332_c11;full_length_coverage=1;non_full_length_coverage=0;isoform_length=5243;expected_accuracy=0.991      | isoform=cb332_c11;full_length_coverage=1;non_full_length_coverage=0;isoform_length=5243;expected_accuracy=0.991     | 1989 | 4542 | 1    | 1994 | 2697 | 5243 | 7    | 1990 |
| cb8564_c129018/f3p0/2395                                                                                             |                                                                                                                     |      |      |      |      |      |      |      |      |
| isoform=cb8564_c129018;full_length_coverage=3;non_full_length_coverage=0;isoform_length=2395;expected_accuracy=0.995 | gnl BL_ORD_ID 56347 cb8564_c74976/f1p0/3389                                                                         | 1    | 2106 | 2104 | 2391 | 1    | 2108 | 3064 | 3349 |
| cb8564_c21572/f1p1/3061                                                                                              | gnl BL_ORD_ID 14977 cb8564_c31966/f8p3/3401                                                                         |      |      |      |      |      |      |      |      |
| isoform=cb8564_c21572;full_length_coverage=1;non_full_length_coverage=1;isoform_length=3061;expected_accuracy=0.991  | isoform=cb8564_c31966;full_length_coverage=8;non_full_length_coverage=3;isoform_length=3401;expected_accuracy=1.000 | 1127 | 3059 | 1    | 1125 | 1488 | 3401 | 208  | 1333 |
| cb4698_c12/f1p2/3047                                                                                                 | gnl BL_ORD_ID 42963 cb4698_c11/f1p0/3141                                                                            |      |      |      |      |      |      |      |      |
| isoform=cb4698_c12;full_length_coverage=1;non_full_length_coverage=2;isoform_length=3047;expected_accuracy=0.991     | isoform=cb4698_c11;full_length_coverage=1;non_full_length_coverage=0;isoform_length=3141;expected_accuracy=0.991    | 1245 | 2962 | 1    | 1245 | 1427 | 3141 | 30   | 1272 |

|                                                                                                                                                                                                                                                                                                                |                                                                                                                                                                                           |        |              |              |              |        |            |              |            |
|----------------------------------------------------------------------------------------------------------------------------------------------------------------------------------------------------------------------------------------------------------------------------------------------------------------|-------------------------------------------------------------------------------------------------------------------------------------------------------------------------------------------|--------|--------------|--------------|--------------|--------|------------|--------------|------------|
| racy=0.997<br>cb8564_c41756/f1p0/2738<br>isoform=cb8564_c41756;full_length_coverage=1;non_full_length_coverage=0;isoform_length=2738;expected_accuracy=0.996<br>cb8564_c39136/f1p0/3036<br>isoform=cb8564_c39136;full_length_coverage=1;non_full_length_coverage=0;isoform_length=3036;expected_accuracy=0.998 | acy=1.000<br>gnl BL_ORD_ID 55413 cb8564_c40978/f1p0/3073<br>gnl BL_ORD_ID 54425 cb8564_c42906/f1p2/3181                                                                                   | 1<br>1 | 2173<br>2089 | 2170<br>2085 | 2738<br>3036 | 1<br>1 | 215<br>207 | 2282<br>2201 | 284<br>315 |
| cb7863_c19/f1p0/2295                                                                                                                                                                                                                                                                                           | gnl BL_ORD_ID 8930                      cb7863_c0/f16p0/2341<br>isoform=cb7863_c0;full_length_coverage=16;non_full_length_coverage=0;isoform_length=2341;expected_accuracy=1.000          | 14     | 1751         | 1750         | 2197         | 1      | 173        | 1894         | 234        |
| cb2737_c57/f1p0/2959                                                                                                                                                                                                                                                                                           | gnl BL_ORD_ID 38134                      cb2737_c22/f1p0/3196<br>isoform=cb2737_c22;full_length_coverage=1;non_full_length_coverage=0;isoform_length=3196;expected_accuracy=0.995         | 1      | 1609         | 1607         | 2862         | 166    | 176        | 1894         | 313        |
| cb6730_c14/f1p0/2258                                                                                                                                                                                                                                                                                           | gnl BL_ORD_ID 3442                      cb6730_c30/f4p0/2653<br>isoform=cb6730_c30;full_length_coverage=4;non_full_length_coverage=0;isoform_length=2653;expected_accuracy=1.000          | 1      | 1382         | 1381         | 2267         | 10     | 139        | 1656         | 254        |
| cb12714_c29/f1p2/1583                                                                                                                                                                                                                                                                                          | gnl BL_ORD_ID 12970                      cb8564_c16702/f2p13/2748<br>isoform=cb8564_c16702;full_length_coverage=2;non_full_length_coverage=13;isoform_length=2748;expected_accuracy=0.998 | 1      | 1296         | 1293         | 1533         | 147    | 144        | 2508         | 274        |
| cb8564_c9363/f3p0/2727                                                                                                                                                                                                                                                                                         | gnl BL_ORD_ID 57310 cb8564_c89545/f1p0/3414                                                                                                                                               | 1      | 1669         | 1667         | 2727         | 7      | 167        | 1994         | 306        |



|                                                                                                                     |                                                                                                                       |                           |      |      |      |      |      |      |           |
|---------------------------------------------------------------------------------------------------------------------|-----------------------------------------------------------------------------------------------------------------------|---------------------------|------|------|------|------|------|------|-----------|
| isoform=cb8564_c9363;full_length_coverage=3;non_full_length_coverage=0;isoform_length=2727;expected_accuracy=0.999  |                                                                                                                       |                           |      |      |      |      |      | 4    | 0         |
| cb9146_c8/f1p0/1115                                                                                                 | gnl BL_ORD_ID 20652                                                                                                   | cb9146_c3/f1p0/1900       |      |      |      |      |      |      |           |
| isoform=cb9146_c8;full_length_coverage=1;non_full_length_coverage=0;isoform_length=1115;expected_accuracy=0.991     | isoform=cb9146_c3;full_length_coverage=1;non_full_length_coverage=0;isoform_length=1900;expected_accuracy=0.994       |                           | 101  | 1080 | 1    | 101  | 245  | 1224 | 40 140    |
| cb8564_c72377/f1p0/3026                                                                                             | gnl BL_ORD_ID 16680                                                                                                   | cb8564_c68963/f3p0/3243   |      |      |      |      |      |      |           |
| isoform=cb8564_c72377;full_length_coverage=1;non_full_length_coverage=0;isoform_length=3026;expected_accuracy=0.995 | isoform=cb8564_c68963;full_length_coverage=3;non_full_length_coverage=0;isoform_length=3243;expected_accuracy=1.000   |                           | 221  | 3026 | 1    | 222  | 399  | 3204 | 2 223     |
| cb1658_c16/f1p1/2736                                                                                                |                                                                                                                       |                           |      |      |      |      |      |      |           |
| isoform=cb1658_c16;full_length_coverage=1;non_full_length_coverage=1;isoform_length=2736;expected_accuracy=0.998    | gnl BL_ORD_ID 63830                                                                                                   | cb1658_c10/f1p0/3994      | 1157 | 2670 | 1    | 1160 | 2370 | 3883 | 14 1174   |
| cb6968_c6/f1p0/2273                                                                                                 | gnl BL_ORD_ID 5944                                                                                                    | cb6968_c19/f6p0/2660      |      |      |      |      |      |      |           |
| isoform=cb6968_c6;full_length_coverage=1;non_full_length_coverage=0;isoform_length=2273;expected_accuracy=0.996     | isoform=cb6968_c19;full_length_coverage=6;non_full_length_coverage=0;isoform_length=2660;expected_accuracy=0.999      |                           | 185  | 2273 | 1    | 185  | 411  | 2500 | 64 249    |
| cb8564_c88673/f1p0/3095                                                                                             | gnl BL_ORD_ID 52655                                                                                                   | cb8564_c10124/f1p0/3457   | 2    | 2319 | 2316 | 3025 | 3    | 2321 | 2674 3383 |
|                                                                                                                     | gnl BL_ORD_ID 13065                                                                                                   | cb8564_c157334/f1p21/2777 |      |      |      |      |      |      |           |
| cb12714_c29/f1p2/1583                                                                                               | isoform=cb8564_c157334;full_length_coverage=1;non_full_length_coverage=21;isoform_length=2777;expected_accuracy=0.995 |                           | 1    | 1296 | 1293 | 1597 | 7    | 1309 | 2376 2680 |
| cb8564_c145335/f3p0/1964                                                                                            | gnl BL_ORD_ID 13736                                                                                                   | cb8564_c1945/f1p0/2267    | 1    | 1452 | 1451 | 1953 | 7    | 146  | 1766 226  |

|                                                                                                                      |                                                                                                                                                                                           |     |      |      |      |      |      |      |      |
|----------------------------------------------------------------------------------------------------------------------|-------------------------------------------------------------------------------------------------------------------------------------------------------------------------------------------|-----|------|------|------|------|------|------|------|
| isoform=cb8564_c145335;full_length_coverage=3;non_full_length_coverage=0;isoform_length=1964;expected_accuracy=0.999 | isoform=cb8564_c1945;full_length_coverage=1;non_full_length_coverage=0;isoform_length=2267;expected_accuracy=0.999                                                                        |     |      |      |      |      | 0    |      | 7    |
| cb4016_c32/f1p0/1913                                                                                                 | gnl BL_ORD_ID 40527                      cb4016_c6/f1p1/2956<br>isoform=cb4016_c6;full_length_coverage=1;non_full_length_coverage=1;isoform_length=2956;expected_accuracy=0.996           | 191 | 1930 | 23   | 194  | 1124 | 2863 | 524  | 697  |
| cb8564_c15653/f1p4/2475                                                                                              | gnl BL_ORD_ID 11957                      cb8564_c135981/f1p0/2840<br>isoform=cb8564_c135981;full_length_coverage=1;non_full_length_coverage=0;isoform_length=2840;expected_accuracy=0.992 | 22  | 2293 | 2289 | 2427 | 220  | 2484 | 2703 | 2840 |
| cb1245_c3/f1p0/3928                                                                                                  | gnl BL_ORD_ID 24061                      cb1245_c0/f6p1/4116<br>isoform=cb1245_c3;full_length_coverage=1;non_full_length_coverage=0;isoform_length=3928;expected_accuracy=0.997           | 1   | 2779 | 2775 | 3890 | 79   | 2858 | 3001 | 4116 |
| cb12034_c11/f1p0/1825                                                                                                | gnl BL_ORD_ID 16101                      cb8564_c52391/f1p0/2080<br>isoform=cb8564_c52391;full_length_coverage=1;non_full_length_coverage=0;isoform_length=2080;expected_accuracy=0.997   | 282 | 1833 | 50   | 283  | 454  | 2031 | 1    | 234  |
| cb8564_c39136/f1p0/3036                                                                                              | gnl BL_ORD_ID 16886                      cb8564_c50727/f1p0/3201<br>isoform=cb8564_c39136;full_length_coverage=1;non_full_length_coverage=0;isoform_length=3036;expected_accuracy=0.998   | 1   | 2089 | 2085 | 3036 | 3    | 2122 | 2248 | 3201 |
| cb8564_c45300/f1p4/3014                                                                                              | gnl BL_ORD_ID 55551                      cb8564_c44964/f1p0/3508<br>isoform=cb8564_c45300;full_length_coverage=1;non_full_length_coverage=4;isoform_length=3014;expected_                 | 243 | 3014 | 1    | 246  | 400  | 3171 | 1    | 243  |

|                         |                     |                          |                                                                                                                     |      |      |      |      |      |      |      |      |
|-------------------------|---------------------|--------------------------|---------------------------------------------------------------------------------------------------------------------|------|------|------|------|------|------|------|------|
| accuracy=0.996          |                     |                          |                                                                                                                     |      |      |      |      |      |      |      |      |
| cb6719_c56/f1p0/2578    | gnl BL_ORD_ID 4663  | cb6719_c20/f1p0/3262     | isoform=cb6719_c20;full_length_coverage=1;non_full_length_coverage=0;isoform_length=3262;expected_accuracy=0.996    | 1    | 1366 | 1365 | 2387 | 755  | 2119 | 2240 | 3262 |
| cb16404_c11/f1p0/1451   | gnl BL_ORD_ID 54733 | cb8564_c160742/f1p0/2024 | isoform=cb16404_c11;full_length_coverage=1;non_full_length_coverage=0;isoform_length=1451;expected_accuracy=1.000   | 160  | 1451 | 17   | 164  | 674  | 1959 | 1    | 147  |
| cb1656_c17/f1p0/3666    | gnl BL_ORD_ID 63828 | cb1656_c15/f1p1/3875     | isoform=cb1656_c17;full_length_coverage=1;non_full_length_coverage=0;isoform_length=3666;expected_accuracy=1.000    | 1    | 3346 | 3342 | 3547 | 1    | 3347 | 3636 | 3839 |
| cb9472_c4/f1p0/1359     | gnl BL_ORD_ID 19537 | cb9472_c2/f1p0/1675      | isoform=cb9472_c4;full_length_coverage=1;non_full_length_coverage=0;isoform_length=1359;expected_accuracy=1.000     | 387  | 1359 | 42   | 388  | 659  | 1631 | 1    | 347  |
| cb8564_c83110/f1p1/2442 | gnl BL_ORD_ID 56754 | cb8564_c70263/f1p2/3393  | isoform=cb8564_c83110;full_length_coverage=1;non_full_length_coverage=1;isoform_length=2442;expected_accuracy=0.997 | 1    | 1295 | 1290 | 2393 | 8    | 1333 | 2242 | 3352 |
| cb8564_c22056/f1p0/3563 | gnl BL_ORD_ID 11514 | cb8564_c12502/f1p0/4194  | isoform=cb8564_c22056;full_length_coverage=1;non_full_length_coverage=0;isoform_length=3563;expected_accuracy=0.998 | 1465 | 3466 | 13   | 1467 | 2077 | 4078 | 1    | 1480 |
| cb1935_c14/f1p0/3028    | gnl BL_ORD_ID 34837 | cb1935_c4/f2p0/3210      | isoform=cb1935_c14;full_length_coverage=2;non_full_length_coverage=0;isoform_length=3210;expected_accuracy=0.996    | 11   | 1968 | 1963 | 3017 | 15   | 2003 | 2126 | 3180 |

|                                                                                                                                                  |                                                                                                                                                                                          |      |      |      |      |      |          |      |          |  |
|--------------------------------------------------------------------------------------------------------------------------------------------------|------------------------------------------------------------------------------------------------------------------------------------------------------------------------------------------|------|------|------|------|------|----------|------|----------|--|
|                                                                                                                                                  | cy=1.000                                                                                                                                                                                 |      |      |      |      |      |          |      |          |  |
| cb4203_c2/f1p0/1914                                                                                                                              | gnl BL_ORD_ID 72345 cb4203_c0/f1p0/3405                                                                                                                                                  | 97   | 1909 | 2    | 101  | 1103 | 291<br>5 | 825  | 925      |  |
| cb8564_c4645/f1p1/2620<br>isoform=cb8564_c4645;full_length_coverage=1;non_full_length_coverage=1;isoform_length=2620;expected_accuracy=0.994     | gnl BL_ORD_ID 55045 cb8564_c4649/f1p0/3061                                                                                                                                               | 1    | 1828 | 1829 | 2561 | 56   | 189<br>4 | 2018 | 274<br>9 |  |
| cb309_c19/f1p0/1785<br>isoform=cb309_c19;full_length_coverage=1;non_full_length_coverage=0;isoform_length=1785;expected_accuracy=0.996           | gnl BL_ORD_ID 69546 cb309_c5/f1p0/4669                                                                                                                                                   | 1    | 1335 | 1336 | 1785 | 2584 | 391<br>8 | 4134 | 458<br>2 |  |
| cb6211_c9/f5p0/2703<br>isoform=cb6211_c9;full_length_coverage=5;non_full_length_coverage=0;isoform_length=2703;expected_accuracy=0.996           | gnl BL_ORD_ID 5238                      cb6211_c20/f1p0/3258<br>isoform=cb6211_c20;full_length_coverage=1;non_full_length_coverage=0;isoform_length=3258;expected_accuracy=0.994         | 1074 | 2664 | 1    | 1076 | 1669 | 325<br>8 | 1    | 107<br>6 |  |
| cb8564_c35399/f1p0/4553                                                                                                                          | gnl BL_ORD_ID 14942                      cb8564_c34188/f2p3/4546<br>isoform=cb8564_c34188;full_length_coverage=2;non_full_length_coverage=3;isoform_length=4546;expected_accuracy=1.000  | 11   | 3381 | 3377 | 4276 | 14   | 338<br>2 | 3647 | 454<br>6 |  |
| cb8564_c118659/f2p0/3437<br>isoform=cb8564_c118659;full_length_coverage=2;non_full_length_coverage=0;isoform_length=3437;expected_accuracy=0.994 | gnl BL_ORD_ID 9995                      cb8564_c111409/f2p0/3661<br>isoform=cb8564_c111409;full_length_coverage=2;non_full_length_coverage=0;isoform_length=3661;expected_accuracy=0.999 | 1    | 2754 | 2752 | 3319 | 85   | 286<br>3 | 3093 | 366<br>1 |  |
| cb8564_c21439/f1p0/2587                                                                                                                          | gnl BL_ORD_ID 11428                      cb8564_c149144/f2p18/3112<br>isoform=cb8564_c149144;full_length_coverage=2;non_full_length_coverage=18;isoform_length=3112;expected_            | 1226 | 2572 | 1    | 1228 | 1353 | 270<br>2 | 1    | 123<br>2 |  |

|                                                                                                                       |                                                                                                                     |      |      |      |      |      |      |      |      |  |
|-----------------------------------------------------------------------------------------------------------------------|---------------------------------------------------------------------------------------------------------------------|------|------|------|------|------|------|------|------|--|
|                                                                                                                       | accuracy=0.994                                                                                                      |      |      |      |      |      |      |      |      |  |
| cb8564_c132795/f5p10/3729                                                                                             |                                                                                                                     |      |      |      |      |      |      |      |      |  |
| isoform=cb8564_c132795;full_length_coverage=5;non_full_length_coverage=10;isoform_length=3729;expected_accuracy=0.999 | gnl BL_ORD_ID 64326 cb14859_c10/f1p0/5042                                                                           | 1    | 1832 | 1830 | 3640 | 1    | 1830 | 3004 | 4814 |  |
| cb8564_c109867/f2p0/3910                                                                                              |                                                                                                                     |      |      |      |      |      |      |      |      |  |
| isoform=cb8564_c109867;full_length_coverage=2;non_full_length_coverage=0;isoform_length=3910;expected_accuracy=0.997  | gnl BL_ORD_ID 54548 cb8564_c125967/f1p0/4340                                                                        | 1    | 2779 | 2779 | 3907 | 44   | 2822 | 3205 | 4332 |  |
| cb7863_c14/f1p0/2372                                                                                                  | gnl BL_ORD_ID 6733 cb7863_c11/f1p0/2693                                                                             |      |      |      |      |      |      |      |      |  |
| isoform=cb7863_c11;full_length_coverage=1;non_full_length_coverage=0;isoform_length=2693;expected_accuracy=0.998      |                                                                                                                     | 111  | 1760 | 1759 | 2354 | 47   | 1697 | 2086 | 2681 |  |
| cb8564_c36731/f1p2/2761                                                                                               | gnl BL_ORD_ID 55912 cb8564_c48681/f1p0/3431                                                                         | 1    | 1977 | 1972 | 2739 | 1    | 1974 | 2451 | 3220 |  |
| cb8564_c79401/f1p0/4816                                                                                               | gnl BL_ORD_ID 16547 cb8564_c69388/f4p1/4992                                                                         |      |      |      |      |      |      |      |      |  |
| isoform=cb8564_c69388;full_length_coverage=4;non_full_length_coverage=1;isoform_length=4992;expected_accuracy=1.000   |                                                                                                                     | 1072 | 4321 | 1    | 1068 | 1744 | 4992 | 790  | 1857 |  |
| cb8564_c75977/f1p0/2165                                                                                               | gnl BL_ORD_ID 18194 cb8564_c89260/f1p0/3637                                                                         |      |      |      |      |      |      |      |      |  |
| isoform=cb8564_c89260;full_length_coverage=1;non_full_length_coverage=0;isoform_length=3637;expected_accuracy=0.995   |                                                                                                                     | 1    | 1393 | 1394 | 2124 | 128  | 1526 | 2906 | 3635 |  |
| cb8564_c71802/f1p1/3657                                                                                               | gnl BL_ORD_ID 16243 cb8564_c69770/f1p2/3779                                                                         |      |      |      |      |      |      |      |      |  |
| isoform=cb8564_c71802;full_length_coverage=1;non_full_length_coverage=1;isoform_length=3657;expected_accuracy=0.999   | isoform=cb8564_c69770;full_length_coverage=1;non_full_length_coverage=2;isoform_length=3779;expected_accuracy=0.999 | 188  | 3579 | 1    | 191  | 388  | 3779 | 84   | 278  |  |

|                                                                                                                                                                    |                                                                                                                                                                      |     |      |      |      |      |      |      |      |
|--------------------------------------------------------------------------------------------------------------------------------------------------------------------|----------------------------------------------------------------------------------------------------------------------------------------------------------------------|-----|------|------|------|------|------|------|------|
| accuracy=1.000<br>cb8564_c118840/f1p1/2264<br>isoform=cb8564_c118840;full_length_coverage=1;non_full_length_coverage=1;isoform_length=2264;expected_accuracy=0.990 | curacy=1.000<br>gnl BL_ORD_ID 54891 cb8564_c3340/f1p0/3978                                                                                                           | 325 | 2264 | 4    | 325  | 1998 | 3920 | 1    | 320  |
| cb8564_c43399/f1p0/2654<br>isoform=cb8564_c43399;full_length_coverage=1;non_full_length_coverage=0;isoform_length=2654;expected_accuracy=0.999                     | gnl BL_ORD_ID 56727 cb8564_c66920/f3p3/2894                                                                                                                          | 1   | 2367 | 2363 | 2646 | 1    | 2364 | 2580 | 2863 |
| cb7749_c11/f1p1/1246                                                                                                                                               | gnl BL_ORD_ID 50687 cb7749_c8/f1p0/1405                                                                                                                              | 169 | 1151 | 4    | 173  | 327  | 1308 | 3    | 172  |
| cb12714_c29/f1p2/1583                                                                                                                                              | gnl BL_ORD_ID 13000 cb8564_c179857/f1p0/2640<br>isoform=cb8564_c179857;full_length_coverage=1;non_full_length_coverage=0;isoform_length=2640;expected_accuracy=0.999 | 1   | 1296 | 1293 | 1597 | 4    | 1299 | 2334 | 2638 |
| cb1333_c101/f1p0/1395<br>isoform=cb1333_c101;full_length_coverage=1;non_full_length_coverage=0;isoform_length=1395;expected_accuracy=0.997                         | gnl BL_ORD_ID 26228 cb1333_c50/f1p0/4810<br>isoform=cb1333_c50;full_length_coverage=1;non_full_length_coverage=0;isoform_length=4810;expected_accuracy=0.996         | 149 | 1395 | 27   | 150  | 3506 | 4745 | 22   | 146  |
| cb500_c38/f1p0/2822<br>isoform=cb500_c38;full_length_coverage=1;non_full_length_coverage=0;isoform_length=2822;expected_accuracy=0.999                             | gnl BL_ORD_ID 42492 cb500_c6/f4p0/3398<br>isoform=cb500_c6;full_length_coverage=4;non_full_length_coverage=0;isoform_length=3398;expected_accuracy=1.000             | 1   | 2396 | 2391 | 2822 | 94   | 2492 | 2954 | 3385 |
| cb8564_c24424/f1p0/4115                                                                                                                                            | gnl BL_ORD_ID 13013 cb8564_c17114/f4p0/3443<br>isoform=cb8564_c17114;full_length_coverage=4;non_full_length_coverage=0;isoform_length=3443;expected_ac               | 12  | 3217 | 3216 | 3380 | 9    | 3215 | 3090 | 3254 |

|                                                                                                                     |                                                                                                                  | curacy=1.000 |      |      |      |      |      |      |      |  |  |
|---------------------------------------------------------------------------------------------------------------------|------------------------------------------------------------------------------------------------------------------|--------------|------|------|------|------|------|------|------|--|--|
| cb8564_c41756/f1p0/2738                                                                                             |                                                                                                                  |              |      |      |      |      |      |      |      |  |  |
| isoform=cb8564_c41756;full_length_coverage=1;non_full_length_coverage=0;isoform_length=2738;expected_accuracy=0.996 | gnl BL_ORD_ID 56727 cb8564_c66920/f3p3/2894                                                                      | 1            | 2173 | 2170 | 2731 | 1    | 2179 | 2302 | 2863 |  |  |
| cb10334_c0/f1p0/1199                                                                                                | gnl BL_ORD_ID 2340 cb10334_c4/f1p0/2353                                                                          |              |      |      |      |      |      |      |      |  |  |
| isoform=cb10334_c0;full_length_coverage=11;non_full_length_coverage=0;isoform_length=1199;expected_accuracy=1.000   | isoform=cb10334_c4;full_length_coverage=1;non_full_length_coverage=0;isoform_length=2353;expected_accuracy=0.999 | 269          | 1199 | 8    | 274  | 1423 | 2351 | 1    | 267  |  |  |
| cb8564_c43399/f1p0/2654                                                                                             |                                                                                                                  |              |      |      |      |      |      |      |      |  |  |
| isoform=cb8564_c43399;full_length_coverage=1;non_full_length_coverage=0;isoform_length=2654;expected_accuracy=0.999 | gnl BL_ORD_ID 56602 cb8564_c48192/f1p6/3029                                                                      | 1            | 2367 | 2363 | 2654 | 1    | 2366 | 2582 | 2872 |  |  |
| cb8564_c71815/f1p0/2753                                                                                             | gnl BL_ORD_ID 58020 cb8564_c86752/f1p1/3346                                                                      | 1            | 1377 | 1372 | 2485 | 47   | 1421 | 1655 | 2772 |  |  |
| cb3543_c6/f1p0/2439                                                                                                 | gnl BL_ORD_ID 39659 cb3543_c3/f2p0/3596                                                                          |              |      |      |      |      |      |      |      |  |  |
| isoform=cb3543_c3;full_length_coverage=2;non_full_length_coverage=0;isoform_length=3596;expected_accuracy=1.000     | isoform=cb3543_c3;full_length_coverage=2;non_full_length_coverage=0;isoform_length=3596;expected_accuracy=1.000  | 1            | 1561 | 1559 | 2049 | 17   | 1577 | 3106 | 3596 |  |  |
| cb8564_c41642/f2p0/3998                                                                                             | gnl BL_ORD_ID 55587 cb8564_c46008/f1p0/4134                                                                      | 1650         | 3997 | 1    | 1652 | 1752 | 4099 | 4    | 1644 |  |  |
| cb500_c17/f1p0/2323                                                                                                 |                                                                                                                  |              |      |      |      |      |      |      |      |  |  |
| isoform=cb500_c17;full_length_coverage=1;non_full_length_coverage=0;isoform_length=2323;expected_accuracy=0.997     | gnl BL_ORD_ID 72248 cb500_c53/f1p0/3672                                                                          | 1            | 1293 | 1288 | 2323 | 894  | 2186 | 2318 | 3353 |  |  |
| cb750_c23/f1p0/3659                                                                                                 | gnl BL_ORD_ID 7348 cb750_c27/f1p1/4163                                                                           | 120          | 2134 | 2133 | 3575 | 150  | 216  | 2719 | 416  |  |  |

|                                                                                                                     |                                                                                                                      |      |      |      |      |      |      |      |      |
|---------------------------------------------------------------------------------------------------------------------|----------------------------------------------------------------------------------------------------------------------|------|------|------|------|------|------|------|------|
|                                                                                                                     | isoform=cb750_c27;full_length_coverage=1;non_full_length_coverage=1;isoform_length=4163;expected_accuracy=0.998      |      |      |      |      |      |      | 2    | 3    |
| cb8564_c39136/f1p0/3036                                                                                             |                                                                                                                      |      |      |      |      |      |      |      |      |
| isoform=cb8564_c39136;full_length_coverage=1;non_full_length_coverage=0;isoform_length=3036;expected_accuracy=0.998 | gnl BL_ORD_ID 55551 cb8564_c44964/f1p0/3508                                                                          | 1    | 2089 | 2085 | 3036 | 1    | 2092 | 2219 | 3173 |
| cb8564_c15230/f1p0/1944                                                                                             | gnl BL_ORD_ID 18416 cb8564_c82572/f1p22/2743                                                                         |      |      |      |      |      |      |      |      |
|                                                                                                                     | isoform=cb8564_c82572;full_length_coverage=1;non_full_length_coverage=22;isoform_length=2743;expected_accuracy=1.000 | 352  | 1944 | 39   | 357  | 1087 | 2680 | 55   | 376  |
| cb8564_c35256/f1p0/3343                                                                                             | gnl BL_ORD_ID 15520 cb8564_c52723/f2p0/3547                                                                          |      |      |      |      |      |      |      |      |
| isoform=cb8564_c35256;full_length_coverage=1;non_full_length_coverage=0;isoform_length=3343;expected_accuracy=0.995 | isoform=cb8564_c52723;full_length_coverage=2;non_full_length_coverage=0;isoform_length=3547;expected_accuracy=0.990  | 1069 | 3343 | 1    | 1070 | 1206 | 3476 | 1    | 1066 |
| cb8564_c47149/f1p1/2601                                                                                             |                                                                                                                      |      |      |      |      |      |      |      |      |
| isoform=cb8564_c47149;full_length_coverage=1;non_full_length_coverage=1;isoform_length=2601;expected_accuracy=0.997 | gnl BL_ORD_ID 55389 cb8564_c40246/f1p1/2822                                                                          | 1    | 1649 | 1649 | 2601 | 4    | 1638 | 1774 | 2721 |
| cb18456_c1748/f1p0/1180                                                                                             | gnl BL_ORD_ID 69244 cb18456_c1759/f1p0/1409                                                                          | 243  | 1188 | 3    | 248  | 423  | 1368 | 42   | 285  |
| cb3297_c15/f1p0/1649                                                                                                | gnl BL_ORD_ID 39501 cb3297_c10/f1p0/2398                                                                             |      |      |      |      |      |      |      |      |
|                                                                                                                     | isoform=cb3297_c10;full_length_coverage=1;non_full_length_coverage=0;isoform_length=2398;expected_accuracy=0.999     | 279  | 1626 | 43   | 279  | 1051 | 2398 | 1    | 227  |
| cb5274_c1/f5p1/2378                                                                                                 | gnl BL_ORD_ID 46078 cb5274_c3/f1p1/3134                                                                              | 1    | 1589 | 1587 | 2375 | 38   | 162  | 2345 | 313  |



|                                                                                                                                               |                                                                                                                                                                           |     |      |      |      |      |     |      |     |
|-----------------------------------------------------------------------------------------------------------------------------------------------|---------------------------------------------------------------------------------------------------------------------------------------------------------------------------|-----|------|------|------|------|-----|------|-----|
| isoform=cb5274_c1;full_length_coverage=5;non_full_length_coverage=1;isoform_length=2378;expected_accuracy=1.000<br>cb8564_c74375/f1p1/2718    | isoform=cb5274_c3;full_length_coverage=1;non_full_length_coverage=1;isoform_length=3134;expected_accuracy=0.994<br>gnl BL_ORD_ID 11877      cb8564_c154206/f1p1/3098      |     |      |      |      |      | 5   |      | 4   |
| isoform=cb8564_c74375;full_length_coverage=1;non_full_length_coverage=1;isoform_length=2718;expected_accuracy=1.000<br>cb12047_c134/f1p0/1727 | isoform=cb8564_c154206;full_length_coverage=1;non_full_length_coverage=1;isoform_length=3098;expected_accuracy=0.990<br>gnl BL_ORD_ID 13419      cb8564_c22364/f4p28/1901 | 1   | 1609 | 1608 | 2718 | 284  | 188 | 1990 | 309 |
| isoform=cb12047_c134;full_length_coverage=1;non_full_length_coverage=0;isoform_length=1727;expected_accuracy=0.999                            | isoform=cb8564_c22364;full_length_coverage=4;non_full_length_coverage=28;isoform_length=1901;expected_accuracy=0.995                                                      | 1   | 1006 | 1001 | 1727 | 1    | 100 | 1108 | 183 |
| cb8564_c113392/f1p0/2376                                                                                                                      | gnl BL_ORD_ID 54891      cb8564_c3340/f1p0/3978                                                                                                                           | 407 | 2308 | 87   | 407  | 1998 | 389 | 1    | 320 |
| cb1573_c35/f1p0/2689                                                                                                                          | gnl BL_ORD_ID 28227      cb1573_c15/f1p0/3869<br>isoform=cb1573_c15;full_length_coverage=1;non_full_length_coverage=0;isoform_length=3869;expected_accuracy=0.997         | 2   | 2210 | 2209 | 2426 | 1094 | 330 | 3646 | 386 |
| cb8564_c127456/f1p1/2149                                                                                                                      | gnl BL_ORD_ID 52085      cb8564_c110321/f1p1/2697                                                                                                                         | 1   | 1731 | 1731 | 2090 | 282  | 201 | 2214 | 257 |
| cb8087_c4/f1p0/2454                                                                                                                           | gnl BL_ORD_ID 8788      cb8087_c5/f1p0/3215<br>isoform=cb8087_c4;full_length_coverage=1;non_full_length_coverage=0;isoform_length=2454;expected_accuracy=0.997            | 2   | 2072 | 2071 | 2454 | 1    | 206 | 2808 | 318 |
| cb4023_c5/f1p1/3111                                                                                                                           | gnl BL_ORD_ID 39794      cb4023_c4/f1p1/4182<br>isoform=cb4023_c5;full_length_coverage=1;non_full_length_coverage=1;isoform_length=3111;expected_accuracy=1.000           | 1   | 2249 | 2247 | 3089 | 24   | 225 | 3347 | 418 |
|                                                                                                                                               | isoform=cb4023_c4;full_length_coverage=1;non_full_length_coverage=1;isoform_length=4182;expected_accuracy=0.999                                                           |     |      |      |      |      | 5   |      | 2   |

|                                                                                                                      |                                                                                                                |     |      |      |      |     |      |      |     |  |  |
|----------------------------------------------------------------------------------------------------------------------|----------------------------------------------------------------------------------------------------------------|-----|------|------|------|-----|------|------|-----|--|--|
| cy=0.994                                                                                                             | cy=0.995                                                                                                       |     |      |      |      |     |      |      |     |  |  |
| cb8564_c38233/f1p0/2780                                                                                              | gnl BL_ORD_ID 54713 cb8564_c158279/f2p4/3190                                                                   | 1   | 1857 | 1856 | 2785 | 218 | 207  | 2199 | 312 |  |  |
| cb5960_c3/f1p0/2695                                                                                                  |                                                                                                                |     |      |      |      |     | 4    |      | 8   |  |  |
| isoform=cb5960_c3;full_length_coverage=1;non_full_length_coverage=0;isoform_length=2695;expected_accuracy=0.991      | gnl BL_ORD_ID 74709 cb5960_c13/f1p0/3400                                                                       | 1   | 1927 | 1928 | 2594 | 62  | 198  | 2733 | 339 |  |  |
|                                                                                                                      |                                                                                                                |     |      |      |      |     | 2    |      | 5   |  |  |
| cb8564_c35155/f1p0/2975                                                                                              | gnl BL_ORD_ID 56633 cb8564_c49796/f2p5/3077                                                                    | 571 | 2834 | 9    | 566  | 740 | 300  | 8    | 555 |  |  |
| cb8564_c35745/f1p0/3577                                                                                              |                                                                                                                |     |      |      |      |     | 3    |      |     |  |  |
| isoform=cb8564_c35745;full_length_coverage=1;non_full_length_coverage=0;isoform_length=3577;expected_accuracy=0.996  | gnl BL_ORD_ID 55990 cb8564_c51337/f1p0/4466                                                                    | 1   | 2773 | 2772 | 3576 | 59  | 283  | 3667 | 447 |  |  |
|                                                                                                                      |                                                                                                                |     |      |      |      |     | 2    |      | 1   |  |  |
| cb12931_c15/f1p0/1493                                                                                                |                                                                                                                |     |      |      |      |     |      |      |     |  |  |
| isoform=cb12931_c15;full_length_coverage=1;non_full_length_coverage=0;isoform_length=1493;expected_accuracy=1.000    | gnl BL_ORD_ID 56602 cb8564_c48192/f1p6/3029                                                                    | 1   | 1106 | 1104 | 1493 | 1   | 1104 | 2484 | 287 |  |  |
|                                                                                                                      |                                                                                                                |     |      |      |      |     |      |      | 2   |  |  |
| cb5271_c5/f1p2/2317                                                                                                  | gnl BL_ORD_ID 73721 cb5271_c9/f1p0/2773                                                                        | 1   | 1284 | 1279 | 2322 | 2   | 128  | 1586 | 262 |  |  |
| cb8564_c119623/f1p0/1981                                                                                             |                                                                                                                |     |      |      |      |     | 5    |      | 9   |  |  |
| isoform=cb8564_c119623;full_length_coverage=1;non_full_length_coverage=0;isoform_length=1981;expected_accuracy=0.997 | gnl BL_ORD_ID 52165 cb8564_c113081/f1p1/2205                                                                   | 1   | 1282 | 1281 | 1981 | 12  | 129  | 1442 | 214 |  |  |
|                                                                                                                      |                                                                                                                |     |      |      |      |     | 1    |      | 3   |  |  |
| cb151_c2/f1p0/4262                                                                                                   | gnl BL_ORD_ID 30050 cb151_c6/f1p0/4591                                                                         |     |      |      |      |     |      |      |     |  |  |
| isoform=cb151_c2;full_length_coverage=1;non_full_length_coverage=0;isoform_length=4262;expected_accuracy=0.994       | isoform=cb151_c6;full_length_coverage=1;non_full_length_coverage=0;isoform_length=4591;expected_accuracy=0.995 | 307 | 4260 | 1    | 308  | 621 | 459  | 163  | 456 |  |  |
|                                                                                                                      |                                                                                                                |     |      |      |      |     | 1    |      |     |  |  |

|                                                                                                                                                           |                                                                                                                                                                                    |      |      |      |      |      |      |      |      |
|-----------------------------------------------------------------------------------------------------------------------------------------------------------|------------------------------------------------------------------------------------------------------------------------------------------------------------------------------------|------|------|------|------|------|------|------|------|
| y=0.992<br>cb8564_c75076/f1p0/3860<br>isoform=cb8564_c75076;full_length_coverage=1;non_full_length_coverage=0;isoform_length=3860;expected_accuracy=0.996 | y=0.991<br>gnl BL_ORD_ID 17579      cb8564_c86687/f1p2/4094<br>isoform=cb8564_c86687;full_length_coverage=1;non_full_length_coverage=2;isoform_length=4094;expected_accuracy=0.996 | 1611 | 3860 | 1    | 1616 | 1823 | 4094 | 24   | 1639 |
| cb3081_c2/f2p1/3441<br>isoform=cb3081_c2;full_length_coverage=2;non_full_length_coverage=1;isoform_length=3441;expected_accuracy=0.994                    | gnl BL_ORD_ID 37158      cb3081_c15/f1p0/3452<br>isoform=cb3081_c15;full_length_coverage=1;non_full_length_coverage=0;isoform_length=3452;expected_accuracy=0.996                  | 311  | 3439 | 145  | 313  | 324  | 3450 | 1    | 169  |
| cb3575_c10/f1p0/3008                                                                                                                                      | gnl BL_ORD_ID 39143      cb3575_c7/f1p1/3444<br>isoform=cb3575_c7;full_length_coverage=1;non_full_length_coverage=1;isoform_length=3444;expected_accuracy=0.997                    | 1396 | 2952 | 1    | 1398 | 1869 | 3444 | 201  | 1598 |
| cb8564_c10549/f1p2/3517<br>isoform=cb8564_c10549;full_length_coverage=1;non_full_length_coverage=2;isoform_length=3517;expected_accuracy=1.000            | gnl BL_ORD_ID 53927      cb8564_c15139/f1p1/4122                                                                                                                                   | 187  | 3517 | 17   | 187  | 584  | 3915 | 225  | 395  |
| cb5189_c1/f3p0/2380<br>isoform=cb5189_c1;full_length_coverage=3;non_full_length_coverage=0;isoform_length=2380;expected_accuracy=0.995                    | gnl BL_ORD_ID 73605      cb5189_c6/f1p0/2847                                                                                                                                       | 1047 | 2380 | 1    | 1047 | 1322 | 2655 | 9    | 1050 |
| cb1301_c5/f1p0/2947<br>isoform=cb1301_c5;full_length_coverage=1;non_full_length_coverage=0;isoform_length=2947;expected_accuracy=0.995                    | gnl BL_ORD_ID 61209      cb1301_c4/f1p0/3013                                                                                                                                       | 1    | 2022 | 2023 | 2855 | 69   | 2082 | 2198 | 3029 |
| cb2907_c2/f1p1/2369                                                                                                                                       | gnl BL_ORD_ID 38597      cb2907_c3/f1p0/2605                                                                                                                                       | 1    | 1817 | 1815 | 2352 | 7    | 181  | 2068 | 260  |

|                                                                                                                 |                                                                                                                                                                                         |     |      |      |      |     |          |      |          |
|-----------------------------------------------------------------------------------------------------------------|-----------------------------------------------------------------------------------------------------------------------------------------------------------------------------------------|-----|------|------|------|-----|----------|------|----------|
| isoform=cb2907_c2;full_length_coverage=1;non_full_length_coverage=1;isoform_length=2369;expected_accuracy=0.991 | isoform=cb2907_c3;full_length_coverage=1;non_full_length_coverage=0;isoform_length=2605;expected_accuracy=0.998                                                                         |     |      |      |      |     | 9        |      | 5        |
| cb5898_c8/f1p0/2072                                                                                             | gnl BL_ORD_ID 45945                      cb5898_c6/f1p0/2574<br>isoform=cb5898_c6;full_length_coverage=1;non_full_length_coverage=0;isoform_length=2574;expected_accuracy=0.994         | 189 | 2051 | 1    | 190  | 697 | 255<br>7 | 23   | 212      |
| cb3586_c11/f1p0/2822                                                                                            | gnl BL_ORD_ID 41150                      cb3586_c3/f1p0/2988<br>isoform=cb3586_c3;full_length_coverage=1;non_full_length_coverage=0;isoform_length=2988;expected_accuracy=0.993         | 278 | 2822 | 1    | 278  | 443 | 298<br>8 | 1    | 274      |
| cb2935_c11/f1p0/3067                                                                                            | gnl BL_ORD_ID 37468                      cb2935_c23/f1p0/3325<br>isoform=cb2935_c23;full_length_coverage=1;non_full_length_coverage=0;isoform_length=3325;expected_accuracy=0.994       | 259 | 3067 | 104  | 263  | 429 | 325<br>9 | 3    | 164      |
| cb8564_c186209/f1p0/2931                                                                                        | gnl BL_ORD_ID 17429                      cb8564_c85447/f1p0/3196<br>isoform=cb8564_c85447;full_length_coverage=1;non_full_length_coverage=0;isoform_length=3196;expected_accuracy=0.997 | 1   | 2399 | 2398 | 2931 | 3   | 241<br>3 | 2660 | 319<br>3 |
| cb8564_c45300/f1p4/3014                                                                                         | gnl BL_ORD_ID 14539                      cb8564_c46562/f2p3/3196<br>isoform=cb8564_c46562;full_length_coverage=2;non_full_length_coverage=3;isoform_length=3196;expected_accuracy=0.995 | 243 | 3012 | 10   | 246  | 417 | 319<br>5 | 16   | 260      |
| cb5857_c26/f1p1/2735                                                                                            | gnl BL_ORD_ID 45453                      cb5857_c9/f1p1/2844<br>isoform=cb5857_c9;full_length_coverage=1;non_full_length_coverage=1;isoform_length=2844;expected_accuracy=0.995         | 1   | 1752 | 1751 | 2620 | 59  | 180<br>9 | 1967 | 283<br>5 |

|                                                                                                                  |                                                                                                                                                                             |      |      |      |      |      |     |      |     |
|------------------------------------------------------------------------------------------------------------------|-----------------------------------------------------------------------------------------------------------------------------------------------------------------------------|------|------|------|------|------|-----|------|-----|
| cb9512_c14/f1p0/1856                                                                                             | cy=0.996<br>gnl BL_ORD_ID 22018      cb9512_c6/f1p0/1979<br>isoform=cb9512_c6;full_length_coverage=1;non_full_length_coverage=0;isoform_length=1979;expected_accuracy=0.993 | 1    | 1294 | 1292 | 1856 | 12   | 130 | 1416 | 197 |
| isoform=cb9512_c14;full_length_coverage=1;non_full_length_coverage=0;isoform_length=1856;expected_accuracy=0.998 | gnl BL_ORD_ID 42617      cb4233_c37/f2p3/2739<br>isoform=cb4233_c37;full_length_coverage=2;non_full_length_coverage=3;isoform_length=2739;expected_accuracy=0.992           | 227  | 2391 | 1    | 225  | 527  | 269 | 502  | 727 |
| cb4233_c84/f1p1/2344                                                                                             | gnl BL_ORD_ID 18820      cb8564_c8764/f7p3/3755<br>isoform=cb8564_c8764;full_length_coverage=7;non_full_length_coverage=3;isoform_length=3755;expected_accuracy=1.000       | 244  | 3055 | 16   | 249  | 943  | 375 | 1    | 236 |
| cb8564_c21052/f1p2/3145                                                                                          | gnl BL_ORD_ID 55920      cb8564_c48949/f1p0/4357                                                                                                                            | 1    | 2269 | 2270 | 2931 | 2    | 229 | 2847 | 350 |
| cb8564_c186209/f1p0/2931                                                                                         | isoform=cb8564_c186209;full_length_coverage=1;non_full_length_coverage=0;isoform_length=2931;expected_accuracy=0.996                                                        |      |      |      |      |      | 3   |      | 5   |
| cb2771_c12/f1p1/2633                                                                                             | gnl BL_ORD_ID 37782      cb2771_c1/f5p1/3188<br>isoform=cb2771_c1;full_length_coverage=5;non_full_length_coverage=1;isoform_length=3188;expected_accuracy=1.000             | 1    | 1952 | 1947 | 2629 | 51   | 200 | 2496 | 318 |
| isoform=cb2771_c12;full_length_coverage=1;non_full_length_coverage=1;isoform_length=2633;expected_accuracy=0.993 | gnl BL_ORD_ID 53630      cb8564_c134203/f1p0/3255                                                                                                                           | 1314 | 2932 | 1    | 1319 | 1481 | 307 | 15   | 133 |
| cb8564_c20798/f1p1/2960                                                                                          | gnl BL_ORD_ID 66710      cb2097_c110/f1p0/2370                                                                                                                              | 1    | 1422 | 1420 | 1809 | 417  | 183 | 1948 | 233 |
| cb2097_c120/f1p0/1809                                                                                            | isoform=cb2097_c120;full_length_coverage=1;non_full_length_coverage=0;isoform_length=1809;expected_accuracy=0.998                                                           |      |      |      |      |      | 8   |      | 7   |

|                                                                                                                  |                                                                                                                    |                        |     |      |      |      |      |      |      |      |
|------------------------------------------------------------------------------------------------------------------|--------------------------------------------------------------------------------------------------------------------|------------------------|-----|------|------|------|------|------|------|------|
| uracy=0.994                                                                                                      |                                                                                                                    |                        |     |      |      |      |      |      |      |      |
| cb583_c0/f3p0/1982                                                                                               | gnl BL_ORD_ID 46617                                                                                                | cb583_c3/f1p0/2797     |     |      |      |      |      |      |      |      |
| isoform=cb583_c0;full_length_coverage=3;non_full_length_coverage=0;isoform_length=1982;expected_accuracy=0.996   | isoform=cb583_c3;full_length_coverage=1;non_full_length_coverage=0;isoform_length=2797;expected_accuracy=0.995     |                        | 1   | 1174 | 1171 | 1957 | 4    | 1180 | 1991 | 2780 |
| cb8564_c2223/f1p0/2047                                                                                           | gnl BL_ORD_ID 13231                                                                                                | cb8564_c2282/f1p1/3052 |     |      |      |      |      |      |      |      |
|                                                                                                                  | isoform=cb8564_c2282;full_length_coverage=1;non_full_length_coverage=1;isoform_length=3052;expected_accuracy=0.995 |                        | 434 | 2042 | 6    | 439  | 1446 | 3052 | 1    | 434  |
| cb3613_c4/f1p0/2552                                                                                              | gnl BL_ORD_ID 41041                                                                                                | cb3613_c3/f1p0/2896    |     |      |      |      |      |      |      |      |
|                                                                                                                  | isoform=cb3613_c3;full_length_coverage=1;non_full_length_coverage=0;isoform_length=2896;expected_accuracy=0.995    |                        | 15  | 2190 | 2185 | 2538 | 21   | 2186 | 2544 | 2896 |
| cb10190_c4/f1p0/1454                                                                                             |                                                                                                                    |                        |     |      |      |      |      |      |      |      |
| isoform=cb10190_c4;full_length_coverage=1;non_full_length_coverage=0;isoform_length=1454;expected_accuracy=0.992 | gnl BL_ORD_ID 48195                                                                                                | cb10190_c2/f1p0/2194   | 1   | 1331 | 1330 | 1454 | 8    | 1338 | 1882 | 2006 |
| cb14139_c2/f1p0/1763                                                                                             | gnl BL_ORD_ID 21468                                                                                                | cb9813_c26/f1p0/2710   |     |      |      |      |      |      |      |      |
| isoform=cb14139_c2;full_length_coverage=1;non_full_length_coverage=0;isoform_length=1763;expected_accuracy=0.991 | isoform=cb9813_c26;full_length_coverage=1;non_full_length_coverage=0;isoform_length=2710;expected_accuracy=0.990   |                        | 10  | 1035 | 1035 | 1763 | 1    | 1024 | 1962 | 2688 |
| cb1333_c99/f1p0/1469                                                                                             |                                                                                                                    |                        |     |      |      |      |      |      |      |      |
| isoform=cb1333_c99;full_length_coverage=1;non_full_length_coverage=0;isoform_length=1469;expected_accuracy=0.996 | gnl BL_ORD_ID 61257                                                                                                | cb1333_c104/f1p0/5565  | 145 | 1468 | 1    | 146  | 3606 | 4940 | 1    | 146  |
| cb1333_c101/f1p0/1395                                                                                            | gnl BL_ORD_ID 61256                                                                                                | cb1333_c103/f1p0/5663  | 149 | 1395 | 27   | 150  | 3805 | 504  | 16   | 139  |

|                                                                                                                     |                                                                                                                      |                          |      |      |      |      |      |     |   |      |      |
|---------------------------------------------------------------------------------------------------------------------|----------------------------------------------------------------------------------------------------------------------|--------------------------|------|------|------|------|------|-----|---|------|------|
| isoform=cb1333_c101;full_length_coverage=1;non_full_length_coverage=0;isoform_length=1395;expected_accuracy=0.997   |                                                                                                                      |                          |      |      |      |      |      |     | 9 |      |      |
| cb8564_c44698/f1p5/2843                                                                                             | gnl BL_ORD_ID 13512                                                                                                  | cb8564_c186209/f1p0/2931 |      |      |      |      |      |     |   |      |      |
| isoform=cb8564_c44698;full_length_coverage=1;non_full_length_coverage=5;isoform_length=2843;expected_accuracy=0.997 | isoform=cb8564_c186209;full_length_coverage=1;non_full_length_coverage=0;isoform_length=2931;expected_accuracy=0.996 |                          | 1    | 2516 | 2511 | 2827 | 1    | 249 | 2 | 2613 | 293  |
| cb792_c8/f3p0/3700                                                                                                  | gnl BL_ORD_ID 8413                                                                                                   | cb792_c27/f1p3/4257      |      |      |      |      |      |     |   |      |      |
| isoform=cb792_c8;full_length_coverage=3;non_full_length_coverage=0;isoform_length=3700;expected_accuracy=1.000      | isoform=cb792_c27;full_length_coverage=1;non_full_length_coverage=3;isoform_length=4257;expected_accuracy=0.993      |                          | 186  | 3691 | 1    | 187  | 741  | 422 | 9 | 431  | 623  |
| cb3007_c9/f1p0/2400                                                                                                 | gnl BL_ORD_ID 70130                                                                                                  | cb3007_c5/f1p0/2390      |      |      |      |      |      |     |   |      |      |
|                                                                                                                     |                                                                                                                      |                          | 1134 | 2300 | 1    | 1139 | 1241 | 240 | 8 | 1    | 1139 |
| cb8564_c43450/f1p0/2695                                                                                             | gnl BL_ORD_ID 55873                                                                                                  | cb8564_c47701/f1p0/3144  |      |      |      |      |      |     |   |      |      |
|                                                                                                                     |                                                                                                                      |                          | 13   | 1886 | 1882 | 2714 | 24   | 192 | 7 | 2042 | 287  |
| cb233_c19/f1p0/2802                                                                                                 | gnl BL_ORD_ID 38487                                                                                                  | cb233_c6/f2p1/3007       |      |      |      |      |      |     |   |      |      |
| isoform=cb233_c19;full_length_coverage=1;non_full_length_coverage=0;isoform_length=2802;expected_accuracy=0.992     | isoform=cb233_c6;full_length_coverage=2;non_full_length_coverage=1;isoform_length=3007;expected_accuracy=0.998       |                          | 1    | 2203 | 2202 | 2802 | 15   | 222 | 0 | 2348 | 295  |
| cb8564_c90455/f1p2/3367                                                                                             | gnl BL_ORD_ID 9651                                                                                                   | cb8564_c11608/f1p2/3419  |      |      |      |      |      |     |   |      |      |
| isoform=cb8564_c90455;full_length_coverage=1;non_full_length_coverage=2;isoform_length=3367;expected_accuracy=0.993 | isoform=cb8564_c11608;full_length_coverage=1;non_full_length_coverage=2;isoform_length=3419;expected_accuracy=0.993  |                          | 22   | 3071 | 3073 | 3349 | 1    | 304 | 4 | 3147 | 341  |
| cb8564_c51722/f1p1/3503                                                                                             | gnl BL_ORD_ID 55195                                                                                                  | cb8564_c35170/f1p0/3386  |      |      |      |      |      |     |   |      |      |
|                                                                                                                     |                                                                                                                      |                          | 541  | 3206 | 67   | 540  | 738  | 339 | 9 | 22   | 497  |
| cb188_c4/f1p1/2870                                                                                                  | gnl BL_ORD_ID 68083                                                                                                  | cb188_c1/f1p1/4971       |      |      |      |      |      |     |   |      |      |
|                                                                                                                     |                                                                                                                      |                          | 1026 | 2818 | 1    | 1027 | 3054 | 484 |   | 1217 | 224  |

|                                                                                                                |                                                                                                                                                                         |     |      |      |      |      |      |      |      |
|----------------------------------------------------------------------------------------------------------------|-------------------------------------------------------------------------------------------------------------------------------------------------------------------------|-----|------|------|------|------|------|------|------|
| isoform=cb188_c4;full_length_coverage=1;non_full_length_coverage=1;isoform_length=2870;expected_accuracy=0.998 |                                                                                                                                                                         |     |      |      |      |      |      | 6    | 3    |
| cb8564_c76982/f1p0/3523                                                                                        | gnl BL_ORD_ID 16157      cb8564_c77802/f1p0/3651<br>isoform=cb8564_c77802;full_length_coverage=1;non_full_length_coverage=0;isoform_length=3651;expected_accuracy=0.996 | 1   | 2599 | 2600 | 3368 | 100  | 2693 | 2810 | 3575 |
| cb1138_c38/f1p0/3611                                                                                           | gnl BL_ORD_ID 23011      cb1138_c11/f1p2/3819<br>isoform=cb1138_c11;full_length_coverage=1;non_full_length_coverage=2;isoform_length=3819;expected_accuracy=0.997       | 1   | 2760 | 2759 | 3430 | 1    | 2759 | 3148 | 3819 |
| cb12302_c31/f1p0/1548                                                                                          | gnl BL_ORD_ID 27346      cb1380_c17/f1p1/1771<br>isoform=cb12302_c31;full_length_coverage=1;non_full_length_coverage=0;isoform_length=1548;expected_accuracy=1.000      | 324 | 1502 | 5    | 329  | 586  | 1771 | 3    | 335  |
| cb2966_c1/f2p0/2466                                                                                            | gnl BL_ORD_ID 70108      cb2966_c2/f1p0/3755<br>isoform=cb2966_c1;full_length_coverage=2;non_full_length_coverage=0;isoform_length=2466;expected_accuracy=0.999         | 162 | 2441 | 1    | 165  | 1388 | 3665 | 1    | 163  |
| cb1926_c7/f1p0/3660                                                                                            | gnl BL_ORD_ID 34503      cb1926_c3/f1p1/4309<br>isoform=cb1926_c7;full_length_coverage=1;non_full_length_coverage=0;isoform_length=3660;expected_accuracy=0.994         | 1   | 3453 | 3452 | 3660 | 1    | 3448 | 3588 | 3798 |
| cb6441_c35/f9p0/1985                                                                                           | gnl BL_ORD_ID 6112      cb6441_c9/f1p0/2855<br>isoform=cb6441_c35;full_length_coverage=9;non_full_length_coverage=0;isoform_length=1985;expected_accuracy=0.999         | 182 | 1965 | 1    | 183  | 1074 | 2854 | 1    | 180  |



|                                                                                                                                                                        |                                                                                                                                                                             |     |      |      |      |     |          |      |          |
|------------------------------------------------------------------------------------------------------------------------------------------------------------------------|-----------------------------------------------------------------------------------------------------------------------------------------------------------------------------|-----|------|------|------|-----|----------|------|----------|
| racy=1.000<br>cb2737_c64/f1p1/2838<br>isoform=cb2737_c64;full_length_coverage=1;non_full_length_coverage=1;isoform_length=2838;expected_accuracy=0.993                 | cy=0.991<br>gnl BL_ORD_ID 68786 cb2737_c50/f1p0/3706                                                                                                                        | 124 | 1537 | 1535 | 2838 | 673 | 208<br>2 | 2214 | 350<br>3 |
| cb8564_c15376/f1p0/4060                                                                                                                                                | gnl BL_ORD_ID 11947      cb8564_c146099/f10p9/3818<br>isoform=cb8564_c146099;full_length_coverage=10;non_full_length_coverage=9;isoform_length=3818;expected_accuracy=1.000 | 12  | 2717 | 2717 | 3675 | 39  | 274<br>2 | 2846 | 380<br>4 |
| cb3618_c19/f1p0/3191<br>cb8564_c21572/f1p1/3061<br>isoform=cb8564_c21572;full_length_coverage=1;non_full_length_coverage=1;isoform_length=3061;expected_accuracy=0.991 | gnl BL_ORD_ID 71384 cb3618_c17/f1p0/3242<br>gnl BL_ORD_ID 54442 cb8564_c122516/f1p2/3535                                                                                    | 1   | 2434 | 2434 | 2868 | 16  | 244<br>3 | 2801 | 323<br>3 |
| cb8564_c186243/f1p0/2948<br>isoform=cb8564_c186243;full_length_coverage=1;non_full_length_coverage=0;isoform_length=2948;expected_accuracy=0.995                       | gnl BL_ORD_ID 54034 cb8564_c17220/f1p1/3235                                                                                                                                 | 1   | 1986 | 1981 | 2948 | 1   | 337<br>6 | 181  | 130<br>6 |
| cb8564_c45699/f1p0/3005                                                                                                                                                | gnl BL_ORD_ID 14531      cb8564_c41778/f1p9/3482<br>isoform=cb8564_c41778;full_length_coverage=1;non_full_length_coverage=9;isoform_length=3482;expected_accuracy=0.992     | 1   | 1986 | 1981 | 2948 | 1   | 198<br>7 | 2151 | 3118     |
| cb6121_c28/f7p0/1771<br>isoform=cb6121_c28;full_length_coverage=7;non_full_length_coverage=0;isoform_length=1771;expected_accuracy=0.993                               | gnl BL_ORD_ID 46546      cb6121_c20/f1p0/1804<br>isoform=cb6121_c20;full_length_coverage=1;non_full_length_coverage=0;isoform_length=1804;expected_accuracy=0.992           | 229 | 2850 | 1    | 233  | 812 | 344<br>1 | 1    | 247      |
|                                                                                                                                                                        | gnl BL_ORD_ID 46546      cb6121_c20/f1p0/1804<br>isoform=cb6121_c20;full_length_coverage=1;non_full_length_coverage=0;isoform_length=1804;expected_accuracy=0.992           | 657 | 1771 | 75   | 658  | 688 | 180<br>1 | 1    | 584      |

|                                                                                                                      |                                                                                                                     |     |      |      |      |      |          |      |          |  |
|----------------------------------------------------------------------------------------------------------------------|---------------------------------------------------------------------------------------------------------------------|-----|------|------|------|------|----------|------|----------|--|
| racy=1.000                                                                                                           | acy=0.995                                                                                                           |     |      |      |      |      |          |      |          |  |
| cb3381_c21/f1p0/3306                                                                                                 | gnl BL_ORD_ID 71158 cb3381_c7/f1p0/3623                                                                             | 756 | 3190 | 77   | 757  | 1166 | 360<br>0 | 3    | 683      |  |
| cb7832_c4/f1p0/2427                                                                                                  |                                                                                                                     |     |      |      |      |      |          |      |          |  |
| isoform=cb7832_c4;full_length_coverage=1;non_full_length_coverage=0;isoform_length=2427;expected_accuracy=0.996      | gnl BL_ORD_ID 50746 cb7832_c2/f1p0/2644                                                                             | 1   | 1349 | 1347 | 2363 | 161  | 151<br>0 | 1611 | 263<br>0 |  |
| cb8564_c111493/f3p5/2014                                                                                             | gnl BL_ORD_ID 18502 cb8564_c978/f1p2/2552                                                                           |     |      |      |      |      |          |      |          |  |
| isoform=cb8564_c111493;full_length_coverage=3;non_full_length_coverage=5;isoform_length=2014;expected_accuracy=1.000 | isoform=cb8564_c978;full_length_coverage=1;non_full_length_coverage=2;isoform_length=2552;expected_accuracy=0.994   | 1   | 1460 | 1458 | 1940 | 1    | 145<br>6 | 2074 | 255<br>2 |  |
| cb965_c40/f1p0/4415                                                                                                  | gnl BL_ORD_ID 20096 cb965_c4/f20p1/4337                                                                             |     |      |      |      |      |          |      |          |  |
| isoform=cb965_c4;full_length_coverage=20;non_full_length_coverage=1;isoform_length=4337;expected_accuracy=1.000      | isoform=cb965_c4;full_length_coverage=20;non_full_length_coverage=1;isoform_length=4337;expected_accuracy=1.000     | 1   | 2886 | 2882 | 4029 | 89   | 297<br>3 | 3190 | 433<br>7 |  |
| cb8564_c48153/f1p0/3083                                                                                              | gnl BL_ORD_ID 16172 cb8564_c53024/f1p0/3159                                                                         |     |      |      |      |      |          |      |          |  |
| isoform=cb8564_c53024;full_length_coverage=1;non_full_length_coverage=0;isoform_length=3159;expected_accuracy=0.996  | isoform=cb8564_c53024;full_length_coverage=1;non_full_length_coverage=0;isoform_length=3159;expected_accuracy=0.996 | 13  | 1740 | 1737 | 2879 | 1    | 169<br>9 | 2017 | 315<br>7 |  |
| cb8564_c184250/f1p0/2256                                                                                             |                                                                                                                     |     |      |      |      |      |          |      |          |  |
| isoform=cb8564_c184250;full_length_coverage=1;non_full_length_coverage=0;isoform_length=2256;expected_accuracy=0.996 | gnl BL_ORD_ID 53144 cb8564_c117565/f1p0/2837                                                                        | 1   | 1642 | 1638 | 2256 | 1    | 165<br>0 | 1911 | 252<br>7 |  |
| cb2815_c0/f2p0/3776                                                                                                  | gnl BL_ORD_ID 37533 cb2815_c3/f1p0/5228                                                                             |     |      |      |      |      |          |      |          |  |
| isoform=cb2815_c0;full_length_coverage=2;non_full_length_coverage=0;isoform_length=3776;expected_accuracy=0.996      | isoform=cb2815_c3;full_length_coverage=1;non_full_length_coverage=0;isoform_length=5228;expected_accuracy=0.996     | 14  | 2801 | 2800 | 3671 | 35   | 282<br>9 | 4356 | 522<br>7 |  |

|                                                                                                                                                                  |                                                                                                                                                                    |      |      |      |      |      |          |      |          |
|------------------------------------------------------------------------------------------------------------------------------------------------------------------|--------------------------------------------------------------------------------------------------------------------------------------------------------------------|------|------|------|------|------|----------|------|----------|
| acy=1.000<br>cb6631_c25/f1p0/1946<br>isoform=cb6631_c25;full_length_coverage=1;non_full_length_coverage=0;isoform_length=1946;expected_accuracy=0.996            | cy=0.995<br>gnl BL_ORD_ID 47610 cb6631_c20/f1p1/2421                                                                                                               | 1    | 1189 | 1186 | 1946 | 15   | 120<br>3 | 1352 | 2117     |
| cb8564_c21527/f7p0/3631<br>isoform=cb8564_c21527;full_length_coverage=7;non_full_length_coverage=0;isoform_length=3631;expected_accuracy=1.000                   | gnl BL_ORD_ID 11711 cb8564_c14355/f1p0/3726<br>isoform=cb8564_c14355;full_length_coverage=1;non_full_length_coverage=0;isoform_length=3726;expected_accuracy=0.995 | 1634 | 3595 | 1    | 1633 | 1768 | 372<br>6 | 1    | 163<br>2 |
| cb12034_c6/f1p0/1822<br>cb10253_c8/f1p0/1576<br>isoform=cb10253_c8;full_length_coverage=1;non_full_length_coverage=0;isoform_length=1576;expected_accuracy=0.997 | gnl BL_ORD_ID 56457 cb8564_c77357/f1p0/3806<br>gnl BL_ORD_ID 48290 cb10253_c5/f1p0/1732                                                                            | 132  | 1609 | 1    | 133  | 2284 | 374<br>9 | 12   | 141      |
| cb8564_c2539/f1p1/2062<br>isoform=cb8564_c2539;full_length_coverage=1;non_full_length_coverage=1;isoform_length=2062;expected_accuracy=0.997                     | gnl BL_ORD_ID 54774 cb8564_c2529/f1p0/3439                                                                                                                         | 1    | 1646 | 1644 | 2062 | 5    | 164<br>4 | 2807 | 322<br>4 |
| cb233_c19/f1p0/2802<br>isoform=cb233_c19;full_length_coverage=1;non_full_length_coverage=0;isoform_length=2802;expected_accuracy=0.992                           | gnl BL_ORD_ID 38488 cb233_c5/f2p0/2943<br>isoform=cb233_c5;full_length_coverage=2;non_full_length_coverage=0;isoform_length=2943;expected_accuracy=1.000           | 1    | 2203 | 2202 | 2767 | 23   | 223<br>0 | 2375 | 294<br>3 |
| cb8564_c21764/f1p0/2599<br>cb8564_c53418/f1p0/2602                                                                                                               | gnl BL_ORD_ID 58004 cb8564_c86464/f1p0/2629<br>gnl BL_ORD_ID 9475 cb8564_c108093/f2p11/2745                                                                        | 1    | 2030 | 2030 | 2619 | 85   | 2112     | 1996 | 258<br>5 |
|                                                                                                                                                                  |                                                                                                                                                                    | 1163 | 2593 | 1    | 1168 | 1283 | 273      | 11   | 1182     |

|                                                                                                                      |                                                                                                                       |   |      |      |      |     |     |      |     |   |
|----------------------------------------------------------------------------------------------------------------------|-----------------------------------------------------------------------------------------------------------------------|---|------|------|------|-----|-----|------|-----|---|
| isoform=cb8564_c53418;full_length_coverage=1;non_full_length_coverage=0;isoform_length=2602;expected_accuracy=0.991  | isoform=cb8564_c108093;full_length_coverage=2;non_full_length_coverage=11;isoform_length=2745;expected_accuracy=0.998 |   |      |      |      |     |     | 8    |     |   |
| cb5422_c6/f1p0/1857                                                                                                  | gnl BL_ORD_ID 73898 cb5422_c10/f1p0/5864                                                                              | 1 | 1128 | 1127 | 1847 | 186 | 131 | 4803 | 552 | 1 |
| cb8564_c119193/f1p2/2975                                                                                             | gnl BL_ORD_ID 17429 cb8564_c85447/f1p0/3196                                                                           |   |      |      |      |     |     |      |     |   |
| isoform=cb8564_c119193;full_length_coverage=1;non_full_length_coverage=2;isoform_length=2975;expected_accuracy=0.998 | isoform=cb8564_c85447;full_length_coverage=1;non_full_length_coverage=0;isoform_length=3196;expected_accuracy=0.997   | 1 | 2439 | 2438 | 2975 | 3   | 241 | 2660 | 319 | 2 |
| cb17137_c7/f1p1/1834                                                                                                 | gnl BL_ORD_ID 9295 cb8564_c121088/f1p1/2137                                                                           |   |      |      |      |     |     |      |     |   |
| isoform=cb8564_c121088;full_length_coverage=1;non_full_length_coverage=1;isoform_length=2137;expected_accuracy=0.998 | isoform=cb8564_c121088;full_length_coverage=1;non_full_length_coverage=1;isoform_length=2137;expected_accuracy=0.998  | 1 | 1291 | 1287 | 1691 | 95  | 136 | 1732 | 213 | 7 |
| cb8564_c37409/f1p0/3153                                                                                              | gnl BL_ORD_ID 55920 cb8564_c48949/f1p0/4357                                                                           | 1 | 2284 | 2285 | 2948 | 2   | 229 | 2847 | 350 | 3 |
| cb8564_c90747/f1p0/2795                                                                                              | gnl BL_ORD_ID 14058 cb8564_c23936/f1p0/3016                                                                           |   |      |      |      |     |     |      |     |   |
| isoform=cb8564_c23936;full_length_coverage=1;non_full_length_coverage=0;isoform_length=3016;expected_accuracy=0.995  | isoform=cb8564_c23936;full_length_coverage=1;non_full_length_coverage=0;isoform_length=3016;expected_accuracy=0.995   | 1 | 1686 | 1684 | 2557 | 4   | 171 | 2143 | 301 | 6 |
| cb8964_c10/f1p0/1945                                                                                                 | gnl BL_ORD_ID 58475 cb8964_c4/f1p0/2407                                                                               |   |      |      |      |     |     |      |     |   |
| isoform=cb8964_c10;full_length_coverage=1;non_full_length_coverage=0;isoform_length=1945;expected_accuracy=0.995     | isoform=cb8964_c4;full_length_coverage=1;non_full_length_coverage=0;isoform_length=2407;expected_accuracy=0.995       | 1 | 1503 | 1503 | 1902 | 43  | 154 | 1856 | 225 | 2 |
| cb18782_c0/f1p2/5630                                                                                                 | gnl BL_ORD_ID 35903 cb18782_c2/f1p2/5753                                                                              |   |      |      |      |     |     |      |     |   |
| isoform=cb18782_c0;full_length_coverage=1;non_full_length_coverage=2;isoform_length=5630;expected_accuracy=0.995     | isoform=cb18782_c2;full_length_coverage=1;non_full_length_coverage=2;isoform_length=5753;expected_accuracy=0.995      | 1 | 4306 | 4304 | 5565 | 35  | 433 | 4474 | 575 | 3 |

|                                                                                                                      |                                                                                                                      |     |      |      |      |      |          |      |          |  |
|----------------------------------------------------------------------------------------------------------------------|----------------------------------------------------------------------------------------------------------------------|-----|------|------|------|------|----------|------|----------|--|
| racy=0.997                                                                                                           | acy=0.991                                                                                                            |     |      |      |      |      |          |      |          |  |
| cb4840_c11/f1p0/1383                                                                                                 | gnl BL_ORD_ID 73021 cb4840_c6/f1p0/2066                                                                              | 215 | 1341 | 30   | 214  | 567  | 169<br>3 | 3    | 187      |  |
| cb8564_c77994/f1p2/2630                                                                                              |                                                                                                                      |     |      |      |      |      |          |      |          |  |
| isoform=cb8564_c77994;full_length_coverage=1;non_full_length_coverage=2;isoform_length=2630;expected_accuracy=0.998  | gnl BL_ORD_ID 56338 cb8564_c74689/f1p0/3037                                                                          | 1   | 1819 | 1815 | 2630 | 16   | 183<br>5 | 1979 | 279<br>5 |  |
| cb4798_c12/f1p0/2329                                                                                                 | gnl BL_ORD_ID 43893          cb4798_c11/f1p0/2939                                                                    |     |      |      |      |      |          |      |          |  |
| isoform=cb4798_c12;full_length_coverage=1;non_full_length_coverage=0;isoform_length=2329;expected_accuracy=0.996     | isoform=cb4798_c11;full_length_coverage=1;non_full_length_coverage=0;isoform_length=2939;expected_accuracy=0.992     | 1   | 1240 | 1239 | 2329 | 2    | 124<br>3 | 1845 | 293<br>7 |  |
| cb8564_c125167/f1p0/2703                                                                                             | gnl BL_ORD_ID 12046          cb8564_c126049/f1p0/3874                                                                |     |      |      |      |      |          |      |          |  |
| isoform=cb8564_c125167;full_length_coverage=1;non_full_length_coverage=0;isoform_length=2703;expected_accuracy=0.996 | isoform=cb8564_c126049;full_length_coverage=1;non_full_length_coverage=0;isoform_length=3874;expected_accuracy=0.997 | 1   | 1753 | 1751 | 2693 | 1059 | 283<br>5 | 2942 | 387<br>4 |  |
| cb8564_c177939/f1p0/1977                                                                                             | gnl BL_ORD_ID 14025          cb8564_c31262/f7p4/2729                                                                 |     |      |      |      |      |          |      |          |  |
| isoform=cb8564_c177939;full_length_coverage=1;non_full_length_coverage=0;isoform_length=1977;expected_accuracy=1.000 | isoform=cb8564_c31262;full_length_coverage=7;non_full_length_coverage=4;isoform_length=2729;expected_accuracy=0.994  | 1   | 1724 | 1723 | 1977 | 139  | 186<br>1 | 2383 | 263<br>4 |  |
| cb5819_c9/f1p0/2331                                                                                                  | gnl BL_ORD_ID 45136          cb5819_c17/f2p0/2480                                                                    |     |      |      |      |      |          |      |          |  |
|                                                                                                                      | isoform=cb5819_c17;full_length_coverage=2;non_full_length_coverage=0;isoform_length=2480;expected_accuracy=0.996     | 366 | 2258 | 5    | 369  | 587  | 247<br>9 | 60   | 424      |  |
| cb6271_c9/f1p0/1555                                                                                                  |                                                                                                                      |     |      |      |      |      |          |      |          |  |
| isoform=cb6271_c9;full_length_coverage=1;non_full_length_coverage=0;isoform_length=1555;expected_accuracy=0.996      | gnl BL_ORD_ID 49572 cb6271_c2/f1p0/2897                                                                              | 1   | 1364 | 1359 | 1555 | 93   | 145<br>7 | 2112 | 231<br>4 |  |

|                                                                                                                                          |                                                                                                                                                                           |     |      |      |      |      |      |      |      |  |
|------------------------------------------------------------------------------------------------------------------------------------------|---------------------------------------------------------------------------------------------------------------------------------------------------------------------------|-----|------|------|------|------|------|------|------|--|
| acy=1.000                                                                                                                                |                                                                                                                                                                           |     |      |      |      |      |      |      |      |  |
| cb8564_c50128/f1p0/4343                                                                                                                  | gnl BL_ORD_ID 16628      cb8564_c47737/f7p5/4351<br>isoform=cb8564_c47737;full_length_coverage=7;non_full_length_coverage=5;isoform_length=4351;expected_accuracy=0.998   | 297 | 4077 | 15   | 301  | 399  | 4179 | 1    | 280  |  |
| cb765_c15/f1p0/3098                                                                                                                      | gnl BL_ORD_ID 49457      cb765_c6/f1p0/4514                                                                                                                               | 1   | 2374 | 2372 | 2793 | 1575 | 3948 | 4090 | 4511 |  |
| cb2773_c15/f1p0/1745<br>isoform=cb2773_c15;full_length_coverage=1;non_full_length_coverage=0;isoform_length=1745;expected_accuracy=1.000 | gnl BL_ORD_ID 68835      cb2773_c5/f1p0/2867                                                                                                                              | 1   | 1395 | 1395 | 1745 | 13   | 1408 | 2513 | 2865 |  |
| cb2430_c6/f1p0/3031<br>isoform=cb2430_c6;full_length_coverage=1;non_full_length_coverage=0;isoform_length=3031;expected_accuracy=0.998   | gnl BL_ORD_ID 38548      cb2430_c4/f2p0/3285<br>isoform=cb2430_c4;full_length_coverage=2;non_full_length_coverage=0;isoform_length=3285;expected_accuracy=0.992           | 1   | 2608 | 2607 | 3031 | 1    | 2616 | 2857 | 3285 |  |
| cb1333_c59/f1p0/2058                                                                                                                     | gnl BL_ORD_ID 26654      cb1333_c1/f7p2/5095<br>isoform=cb1333_c1;full_length_coverage=7;non_full_length_coverage=2;isoform_length=5095;expected_accuracy=0.999           | 153 | 2065 | 1    | 152  | 3183 | 5095 | 47   | 198  |  |
| cb18708_c1/f1p0/1670                                                                                                                     | gnl BL_ORD_ID 57291      cb8564_c89181/f1p1/2994                                                                                                                          | 1   | 1005 | 1002 | 1675 | 715  | 1719 | 2317 | 2990 |  |
| cb16130_c1/f2p0/1014<br>isoform=cb16130_c1;full_length_coverage=2;non_full_length_coverage=0;isoform_length=1014;expected_accuracy=0.997 | gnl BL_ORD_ID 12256      cb8564_c129456/f1p0/2332<br>isoform=cb8564_c129456;full_length_coverage=1;non_full_length_coverage=0;isoform_length=2332;expected_accuracy=0.997 | 244 | 1010 | 8    | 243  | 1572 | 2332 | 1    | 235  |  |
| cb99_c7/f1p0/3479                                                                                                                        | gnl BL_ORD_ID 21972      cb99_c4/f1p1/4938                                                                                                                                | 144 | 3479 | 1    | 144  | 1284 | 463  | 32   | 169  |  |

|                                                                                                                                                 |                                                                                                                                                                              |     |      |      |      |      |     |      |     |   |
|-------------------------------------------------------------------------------------------------------------------------------------------------|------------------------------------------------------------------------------------------------------------------------------------------------------------------------------|-----|------|------|------|------|-----|------|-----|---|
| isoform=cb99_c7;full_length_coverage=1;non_full_length_coverage=0;isoform_length=3479;expected_accuracy=0.990<br>cb1333_c101/f1p0/1395          | isoform=cb99_c4;full_length_coverage=1;non_full_length_coverage=1;isoform_length=4938;expected_accuracy=0.999<br>gnl BL_ORD_ID 26023          cb1333_c10/f4p0/1937           |     |      |      |      |      |     | 2    |     |   |
| isoform=cb1333_c101;full_length_coverage=1;non_full_length_coverage=0;isoform_length=1395;expected_accuracy=0.997<br>cb8564_c152519/f2p1/2103   | isoform=cb1333_c10;full_length_coverage=4;non_full_length_coverage=0;isoform_length=1937;expected_accuracy=1.000<br>gnl BL_ORD_ID 55572          cb8564_c45654/f1p0/2343     | 149 | 1395 | 6    | 148  | 614  | 185 | 1    | 142 |   |
| isoform=cb8564_c152519;full_length_coverage=2;non_full_length_coverage=1;isoform_length=2103;expected_accuracy=1.000<br>cb8564_c91980/f1p0/1973 | gnl BL_ORD_ID 17247          cb8564_c87662/f4p1/3732                                                                                                                         | 1   | 1153 | 1152 | 2082 | 51   | 120 | 1410 | 233 | 9 |
| isoform=cb8564_c91980;full_length_coverage=1;non_full_length_coverage=0;isoform_length=1973;expected_accuracy=0.999<br>cb10253_c8/f1p0/1576     | isoform=cb8564_c87662;full_length_coverage=4;non_full_length_coverage=1;isoform_length=3732;expected_accuracy=0.999<br>gnl BL_ORD_ID 1693          cb10253_c6/f1p0/1651      | 1   | 1334 | 1334 | 1973 | 1022 | 235 | 3094 | 373 | 2 |
| isoform=cb10253_c8;full_length_coverage=1;non_full_length_coverage=0;isoform_length=1576;expected_accuracy=0.997<br>cb4233_c110/f1p1/2847       | isoform=cb10253_c6;full_length_coverage=1;non_full_length_coverage=0;isoform_length=1651;expected_accuracy=1.000<br>gnl BL_ORD_ID 72375          cb4233_c106/f1p2/3225       | 338 | 1576 | 78   | 342  | 367  | 160 | 1    | 265 |   |
| cb8564_c13789/f1p1/3323                                                                                                                         | gnl BL_ORD_ID 9976          cb8564_c10328/f1p1/3525                                                                                                                          | 1   | 1984 | 1983 | 2544 | 3    | 198 | 2666 | 322 | 7 |
| cb8564_c119435/f1p0/2633                                                                                                                        | isoform=cb8564_c10328;full_length_coverage=1;non_full_length_coverage=1;isoform_length=3525;expected_accuracy=0.995<br>gnl BL_ORD_ID 10826          cb8564_c114896/f1p2/3068 | 2   | 2819 | 2820 | 3280 | 2    | 283 | 3064 | 352 | 5 |
|                                                                                                                                                 |                                                                                                                                                                              | 500 | 2389 | 7    | 503  | 1060 | 294 | 116  | 619 |   |

|                          |                                                                                                                      |     |      |      |      |     |      |      |     |   |   |
|--------------------------|----------------------------------------------------------------------------------------------------------------------|-----|------|------|------|-----|------|------|-----|---|---|
|                          | isoform=cb8564_c114896;full_length_coverage=1;non_full_length_coverage=2;isoform_length=3068;expected_accuracy=0.993 |     |      |      |      |     |      |      | 3   |   |   |
| cb5487_c2/f1p0/3186      | gnl BL_ORD_ID 73975 cb5487_c11/f1p0/2702                                                                             | 1   | 1484 | 1484 | 2448 | 1   | 147  | 1646 | 260 | 7 | 8 |
| cb8564_c49562/f1p0/2838  | isoform=cb8564_c49562;full_length_coverage=1;non_full_length_coverage=0;isoform_length=2838;expected_accuracy=0.995  |     |      |      |      |     |      |      |     |   |   |
|                          | gnl BL_ORD_ID 56961 cb8564_c78609/f1p0/3194                                                                          | 23  | 2331 | 2327 | 2838 | 45  | 235  | 2465 | 297 | 8 | 8 |
| cb8564_c109969/f3p0/3562 | isoform=cb8564_c109969;full_length_coverage=3;non_full_length_coverage=0;isoform_length=3562;expected_accuracy=0.998 |     |      |      |      |     |      |      |     |   |   |
|                          | gnl BL_ORD_ID 53494 cb8564_c126420/f1p0/4861                                                                         | 1   | 3313 | 3308 | 3562 | 18  | 332  | 4495 | 474 | 8 | 7 |
| cb4744_c4/f1p0/1625      | gnl BL_ORD_ID 44018 cb4744_c0/f2p0/2942                                                                              |     |      |      |      |     |      |      |     |   |   |
|                          | isoform=cb4744_c0;full_length_coverage=2;non_full_length_coverage=0;isoform_length=2942;expected_accuracy=0.997      | 1   | 1153 | 1151 | 1507 | 1   | 1152 | 2567 | 292 |   | 3 |
| cb8564_c20112/f1p0/3162  | gnl BL_ORD_ID 18821 cb8564_c8768/f7p0/3451                                                                           |     |      |      |      |     |      |      |     |   |   |
|                          | isoform=cb8564_c8768;full_length_coverage=7;non_full_length_coverage=0;isoform_length=3451;expected_accuracy=0.999   | 1   | 1640 | 1638 | 3162 | 114 | 175  | 1916 | 344 | 4 | 2 |
| cb2698_c6/f1p0/1752      | gnl BL_ORD_ID 37643 cb2698_c2/f1p0/1886                                                                              |     |      |      |      |     |      |      |     |   |   |
|                          | isoform=cb2698_c2;full_length_coverage=1;non_full_length_coverage=0;isoform_length=1752;expected_accuracy=0.998      | 303 | 1752 | 65   | 304  | 442 | 188  | 26   | 265 | 4 |   |
| cb8564_c186356/f1p0/2744 | gnl BL_ORD_ID 56727 cb8564_c66920/f3p3/2894                                                                          | 1   | 1396 | 1393 | 2740 | 1   | 139  | 1516 | 286 |   |   |



|                                                                                                                      |                     |                          |      |      |     |      |      |      |    |      |
|----------------------------------------------------------------------------------------------------------------------|---------------------|--------------------------|------|------|-----|------|------|------|----|------|
| isoform=cb8564_c186356;full_length_coverage=1;non_full_length_coverage=0;isoform_length=2744;expected_accuracy=0.998 |                     |                          |      |      |     |      |      | 6    |    | 3    |
| cb8564_c20363/f1p3/2558                                                                                              | gnl BL_ORD_ID 14835 | cb8564_c24261/f1p1/2563  |      |      |     |      |      |      |    |      |
| isoform=cb8564_c20363;full_length_coverage=1;non_full_length_coverage=3;isoform_length=2558;expected_accuracy=0.997  | gnl BL_ORD_ID 14835 | cb8564_c24261/f1p1/2563  | 587  | 2541 | 84  | 588  | 611  | 2563 | 1  | 505  |
| cb3957_c1/f2p1/5488                                                                                                  | gnl BL_ORD_ID 71673 | cb3957_c5/f1p1/7529      |      |      |     |      |      |      |    |      |
| isoform=cb3957_c1;full_length_coverage=2;non_full_length_coverage=1;isoform_length=5488;expected_accuracy=0.998      | gnl BL_ORD_ID 71673 | cb3957_c5/f1p1/7529      | 2777 | 5486 | 119 | 2778 | 4833 | 7540 | 1  | 2652 |
| cb1317_c11/f1p1/4136                                                                                                 | gnl BL_ORD_ID 61229 | cb1317_c8/f1p0/4195      |      |      |     |      |      |      |    |      |
| isoform=cb1317_c11;full_length_coverage=1;non_full_length_coverage=1;isoform_length=4136;expected_accuracy=0.997     | gnl BL_ORD_ID 61229 | cb1317_c8/f1p0/4195      | 227  | 4136 | 1   | 227  | 461  | 4354 | 6  | 232  |
| cb8564_c43455/f1p0/2242                                                                                              | gnl BL_ORD_ID 53489 | cb8564_c126370/f2p7/2635 |      |      |     |      |      |      |    |      |
| isoform=cb8564_c43455;full_length_coverage=1;non_full_length_coverage=0;isoform_length=2242;expected_accuracy=0.995  | gnl BL_ORD_ID 53489 | cb8564_c126370/f2p7/2635 | 279  | 2242 | 33  | 283  | 554  | 2520 | 35 | 285  |
| cb12662_c8/f1p0/1447                                                                                                 | gnl BL_ORD_ID 61792 | cb12662_c11/f1p0/1530    |      |      |     |      |      |      |    |      |
| isoform=cb12662_c8;full_length_coverage=1;non_full_length_coverage=1;isoform_length=1600;expected_accuracy=0.996     | gnl BL_ORD_ID 61792 | cb12662_c11/f1p0/1530    | 179  | 1453 | 54  | 179  | 258  | 1532 | 1  | 126  |
| cb12422_c8/f1p1/1600                                                                                                 | gnl BL_ORD_ID 23174 | cb12422_c9/f1p2/1757     |      |      |     |      |      |      |    |      |
| isoform=cb12422_c8;full_length_coverage=1;non_full_length_coverage=1;isoform_length=1600;expected_accuracy=0.996     | gnl BL_ORD_ID 23174 | cb12422_c9/f1p2/1757     | 281  | 1600 | 7   | 285  | 392  | 1711 | 1  | 281  |
| cb3644_c22/f1p0/3675                                                                                                 | gnl BL_ORD_ID 39863 | cb3644_c15/f1p0/3548     |      |      |     |      |      |      |    |      |
| isoform=cb3644_c22;full_length_coverage=1;non_full_length_coverage=1;isoform_length=3675;expected_accuracy=0.995     | gnl BL_ORD_ID 39863 | cb3644_c15/f1p0/3548     | 1517 | 3136 | 13  | 1517 | 1928 | 354  | 1  | 147  |

|                          |                                                                                                                                                                           |     |      |      |      |     |          |      |          |
|--------------------------|---------------------------------------------------------------------------------------------------------------------------------------------------------------------------|-----|------|------|------|-----|----------|------|----------|
|                          | isoform=cb3644_c15;full_length_coverage=1;non_full_length_coverage=0;isoform_length=3548;expected_accuracy=0.995                                                          |     |      |      |      |     | 8        |      | 7        |
| cb8564_c86900/f1p0/3283  | gnl BL_ORD_ID 16917      cb8564_c48079/f5p1/3512<br>isoform=cb8564_c48079;full_length_coverage=5;non_full_length_coverage=1;isoform_length=3512;expected_accuracy=0.995   | 211 | 3083 | 14   | 213  | 498 | 337<br>0 | 1    | 200      |
| cb7315_c15/f1p0/1788     | gnl BL_ORD_ID 6615      cb7315_c1/f3p0/2330<br>isoform=cb7315_c1;full_length_coverage=3;non_full_length_coverage=0;isoform_length=2330;expected_accuracy=0.992            | 1   | 1670 | 1667 | 1788 | 1   | 167<br>4 | 2159 | 228<br>0 |
| cb1581_c17/f1p4/2476     | gnl BL_ORD_ID 28677      cb1581_c8/f1p0/2559<br>isoform=cb1581_c8;full_length_coverage=1;non_full_length_coverage=4;isoform_length=2476;expected_accuracy=0.997           | 229 | 2386 | 1    | 228  | 402 | 255<br>9 | 23   | 247      |
| cb8564_c116345/f1p1/2198 | gnl BL_ORD_ID 11002      cb8564_c119745/f1p1/2751<br>isoform=cb8564_c119745;full_length_coverage=1;non_full_length_coverage=1;isoform_length=2198;expected_accuracy=0.991 | 369 | 2180 | 4    | 373  | 896 | 270<br>7 | 1    | 388      |
| cb9789_c4/f1p0/1770      | gnl BL_ORD_ID 20884      cb9789_c2/f1p0/1933<br>isoform=cb9789_c2;full_length_coverage=1;non_full_length_coverage=0;isoform_length=1770;expected_accuracy=1.000           | 366 | 1769 | 5    | 370  | 519 | 192<br>3 | 14   | 382      |
| cb17104_c0/f1p0/1194     | gnl BL_ORD_ID 33287      cb17104_c5/f1p0/1481<br>isoform=cb17104_c5;full_length_coverage=1;non_full_length_coverage=0;isoform_length=1194;expected_accuracy=0.995         | 113 | 1190 | 1    | 115  | 404 | 148<br>1 | 95   | 209      |

|                                                                                                                                                          |                                                                                                                                                                                  |     |      |      |      |      |      |      |      |
|----------------------------------------------------------------------------------------------------------------------------------------------------------|----------------------------------------------------------------------------------------------------------------------------------------------------------------------------------|-----|------|------|------|------|------|------|------|
| racy=1.000<br>cb13565_c28/f1p4/1411<br>isoform=cb13565_c28;full_length_coverage=1;non_full_length_coverage=4;isoform_length=1411;expected_accuracy=0.998 | acy=0.993<br>gnl BL_ORD_ID 27684      cb13565_c65/f1p4/1614<br>isoform=cb13565_c65;full_length_coverage=1;non_full_length_coverage=4;isoform_length=1614;expected_accuracy=1.000 | 143 | 1410 | 44   | 147  | 349  | 1614 | 61   | 164  |
| cb8564_c38233/f1p0/2780                                                                                                                                  | gnl BL_ORD_ID 15649      cb8564_c69003/f5p1/3374<br>isoform=cb8564_c69003;full_length_coverage=5;non_full_length_coverage=1;isoform_length=3374;expected_accuracy=1.000          | 1   | 1857 | 1856 | 2785 | 220  | 2076 | 2201 | 3130 |
| cb8564_c145424/f8p2/3323<br>isoform=cb8564_c145424;full_length_coverage=8;non_full_length_coverage=2;isoform_length=3323;expected_accuracy=0.998         | gnl BL_ORD_ID 52661      cb8564_c10315/f1p0/4512                                                                                                                                 | 443 | 3310 | 73   | 443  | 1549 | 4416 | 1    | 371  |
| cb2737_c40/f1p0/2830                                                                                                                                     | gnl BL_ORD_ID 36735      cb2737_c13/f1p0/3105<br>isoform=cb2737_c13;full_length_coverage=1;non_full_length_coverage=0;isoform_length=3105;expected_accuracy=0.995                | 1   | 1397 | 1395 | 2651 | 283  | 1676 | 1808 | 3063 |
| cb4007_c46/f1p0/3154                                                                                                                                     | gnl BL_ORD_ID 40420      cb4007_c17/f1p0/3468<br>isoform=cb4007_c17;full_length_coverage=1;non_full_length_coverage=0;isoform_length=3468;expected_accuracy=1.000                | 1   | 2403 | 2399 | 2985 | 1    | 2404 | 2880 | 3467 |
| cb8564_c44290/f1p1/3198                                                                                                                                  | gnl BL_ORD_ID 18852      cb8564_c84488/f1p0/3408<br>isoform=cb8564_c84488;full_length_coverage=1;non_full_length_coverage=0;isoform_length=3408;expected_accuracy=0.996          | 339 | 2957 | 5    | 338  | 791  | 3408 | 4    | 312  |
| cb8889_c1/f2p1/2254                                                                                                                                      | gnl BL_ORD_ID 58440      cb8889_c5/f1p0/2686                                                                                                                                     | 1   | 1221 | 1221 | 2254 | 1    | 120  | 1496 | 253  |



|                                                                                                                      |                                                                                                                     |      |      |      |      |      |     |      |     |   |
|----------------------------------------------------------------------------------------------------------------------|---------------------------------------------------------------------------------------------------------------------|------|------|------|------|------|-----|------|-----|---|
| isoform=cb5378_c2;full_length_coverage=1;non_full_length_coverage=0;isoform_length=2616;expected_accuracy=0.999      |                                                                                                                     |      |      |      |      |      |     | 0    |     | 7 |
| cb8564_c36731/f1p2/2761                                                                                              | gnl BL_ORD_ID 55182 cb8564_c34825/f1p2/3200                                                                         | 10   | 1977 | 1972 | 2739 | 6    | 200 | 2432 | 319 | 7 |
| cb3888_c4/f1p0/3311                                                                                                  |                                                                                                                     |      |      |      |      |      |     |      |     |   |
| isoform=cb3888_c4;full_length_coverage=1;non_full_length_coverage=0;isoform_length=3311;expected_accuracy=0.993      | gnl BL_ORD_ID 71602 cb3888_c2/f1p0/3488                                                                             | 226  | 3229 | 1    | 227  | 460  | 347 | 1    | 228 | 3 |
| cb4016_c32/f1p0/1913                                                                                                 | gnl BL_ORD_ID 40895 cb4016_c12/f1p0/2681                                                                            |      |      |      |      |      |     |      |     |   |
| isoform=cb4016_c12;full_length_coverage=1;non_full_length_coverage=0;isoform_length=2681;expected_accuracy=0.992     |                                                                                                                     | 191  | 1930 | 25   | 194  | 918  | 265 | 320  | 490 | 1 |
| cb8564_c79528/f2p1/3397                                                                                              | gnl BL_ORD_ID 19049 cb8564_c79989/f1p1/3569                                                                         |      |      |      |      |      |     |      |     |   |
| isoform=cb8564_c79528;full_length_coverage=2;non_full_length_coverage=1;isoform_length=3397;expected_accuracy=0.995  | isoform=cb8564_c79989;full_length_coverage=1;non_full_length_coverage=1;isoform_length=3569;expected_accuracy=0.997 | 1262 | 3392 | 108  | 1261 | 1441 | 356 | 184  | 133 | 9 |
| cb8564_c71816/f1p1/3018                                                                                              | gnl BL_ORD_ID 11730 cb8564_c146015/f9p2/3016                                                                        |      |      |      |      |      |     |      |     |   |
| isoform=cb8564_c146015;full_length_coverage=9;non_full_length_coverage=2;isoform_length=3016;expected_accuracy=1.000 |                                                                                                                     | 1    | 2019 | 2020 | 2916 | 203  | 222 | 2120 | 301 | 0 |
| cb5616_c5/f1p0/2496                                                                                                  | gnl BL_ORD_ID 45329 cb5616_c4/f1p0/3056                                                                             |      |      |      |      |      |     |      |     |   |
| isoform=cb5616_c5;full_length_coverage=1;non_full_length_coverage=0;isoform_length=2496;expected_accuracy=0.996      | isoform=cb5616_c4;full_length_coverage=1;non_full_length_coverage=0;isoform_length=3056;expected_accuracy=1.000     | 307  | 2400 | 4    | 311  | 960  | 305 | 1    | 308 | 6 |
| cb12714_c29/f1p2/1583                                                                                                | gnl BL_ORD_ID 57800 cb8564_c81082/f1p0/3091                                                                         |      |      |      |      |      |     |      |     |   |
|                                                                                                                      |                                                                                                                     | 1    | 1296 | 1293 | 1596 | 3    | 129 | 2515 | 281 |   |

|                                                                                                                      |                                                                                                                      |                          |      |      |      |      |      |      |      |      |
|----------------------------------------------------------------------------------------------------------------------|----------------------------------------------------------------------------------------------------------------------|--------------------------|------|------|------|------|------|------|------|------|
| cb3106_c10/f1p1/2435                                                                                                 | gnl BL_ORD_ID 37403                                                                                                  | cb3106_c8/f1p0/3729      |      |      |      |      |      | 8    | 8    |      |
| isoform=cb3106_c10;full_length_coverage=1;non_full_length_coverage=1;isoform_length=2435;expected_accuracy=0.995     | isoform=cb3106_c8;full_length_coverage=1;non_full_length_coverage=0;isoform_length=3729;expected_accuracy=0.994      |                          | 1    | 1913 | 1909 | 2435 | 1    | 1906 | 3143 | 3666 |
| cb8564_c106810/f5p0/2936                                                                                             | gnl BL_ORD_ID 19026                                                                                                  | cb8564_c83568/f1p0/3138  |      |      |      |      |      |      |      |      |
| isoform=cb8564_c106810;full_length_coverage=5;non_full_length_coverage=0;isoform_length=2936;expected_accuracy=1.000 | isoform=cb8564_c83568;full_length_coverage=1;non_full_length_coverage=0;isoform_length=3138;expected_accuracy=0.995  |                          | 1424 | 2855 | 1    | 1424 | 1711 | 3138 | 20   | 1477 |
| cb5307_c9/f1p0/2902                                                                                                  | gnl BL_ORD_ID 73767                                                                                                  | cb5307_c3/f1p0/3130      |      |      |      |      |      |      |      |      |
| isoform=cb5307_c9;full_length_coverage=1;non_full_length_coverage=0;isoform_length=2902;expected_accuracy=0.994      | isoform=cb5307_c3;full_length_coverage=1;non_full_length_coverage=0;isoform_length=3130;expected_accuracy=0.995      |                          | 1204 | 2896 | 1    | 1204 | 1370 | 3063 | 62   | 1262 |
| cb3887_c12/f2p0/2396                                                                                                 | gnl BL_ORD_ID 39511                                                                                                  | cb3887_c5/f1p0/2830      |      |      |      |      |      |      |      |      |
| isoform=cb3887_c12;full_length_coverage=2;non_full_length_coverage=0;isoform_length=2396;expected_accuracy=0.994     | isoform=cb3887_c5;full_length_coverage=1;non_full_length_coverage=0;isoform_length=2830;expected_accuracy=0.996      |                          | 1    | 1834 | 1830 | 2396 | 90   | 1900 | 2239 | 2798 |
| cb416_c19/f1p0/2939                                                                                                  | gnl BL_ORD_ID 44207                                                                                                  | cb416_c73/f3p0/3007      |      |      |      |      |      |      |      |      |
| isoform=cb416_c19;full_length_coverage=1;non_full_length_coverage=0;isoform_length=2939;expected_accuracy=0.995      | isoform=cb416_c73;full_length_coverage=3;non_full_length_coverage=0;isoform_length=3007;expected_accuracy=1.000      |                          | 105  | 2849 | 10   | 107  | 259  | 3006 | 56   | 156  |
| cb8564_c109636/f4p0/2195                                                                                             | gnl BL_ORD_ID 53478                                                                                                  | cb8564_c126020/f1p1/2281 |      |      |      |      |      |      |      |      |
| isoform=cb8564_c109636;full_length_coverage=4;non_full_length_coverage=0;isoform_length=2195;expected_accuracy=0.995 | isoform=cb8564_c126020;full_length_coverage=1;non_full_length_coverage=0;isoform_length=2281;expected_accuracy=0.995 |                          | 1    | 1988 | 1987 | 2195 | 15   | 1980 | 2084 | 2292 |
| cb8564_c114729/f1p1/2091                                                                                             | gnl BL_ORD_ID 54774                                                                                                  | cb8564_c2529/f1p0/3439   |      |      |      |      |      |      |      |      |
| isoform=cb8564_c114729;full_length_coverage=1;non_full_length_coverage=1;isoform_length=2091;expected_accuracy=0.995 | isoform=cb8564_c2529;full_length_coverage=1;non_full_length_coverage=0;isoform_length=3439;expected_accuracy=0.995   |                          | 1    | 1609 | 1608 | 2091 | 32   | 1643 | 2761 | 3248 |

|                         |                                                                                                                                                                           |     |      |      |      |      |          |      |          |
|-------------------------|---------------------------------------------------------------------------------------------------------------------------------------------------------------------------|-----|------|------|------|------|----------|------|----------|
| _accuracy=0.994         |                                                                                                                                                                           |     |      |      |      |      |          |      |          |
| cb8564_c38233/f1p0/2780 | gnl BL_ORD_ID 12520      cb8564_c146064/f3p0/3212<br>isoform=cb8564_c146064;full_length_coverage=3;non_full_length_coverage=0;isoform_length=3212;expected_accuracy=1.000 | 1   | 1857 | 1856 | 2782 | 306  | 216<br>2 | 2287 | 321<br>2 |
| cb8564_c89555/f1p0/3557 | gnl BL_ORD_ID 14775      cb8564_c31987/f2p1/3601<br>isoform=cb8564_c31987;full_length_coverage=2;non_full_length_coverage=1;isoform_length=3601;expected_accuracy=0.993   | 2   | 2714 | 2715 | 3462 | 3    | 270<br>6 | 2854 | 360<br>0 |
| cb8564_c20202/f1p0/2556 | gnl BL_ORD_ID 54324      cb8564_c22446/f1p0/2866<br>isoform=cb8564_c20202;full_length_coverage=1;non_full_length_coverage=0;isoform_length=2556;expected_accuracy=0.999   | 16  | 2227 | 2224 | 2556 | 1    | 221<br>6 | 2380 | 271<br>2 |
| cb938_c17/f1p1/3461     | gnl BL_ORD_ID 59101      cb938_c9/f1p0/4170<br>isoform=cb938_c17;full_length_coverage=1;non_full_length_coverage=1;isoform_length=3461;expected_accuracy=0.991            | 1   | 2564 | 2564 | 3459 | 1    | 256<br>5 | 3262 | 416<br>3 |
| cb7612_c6/f1p0/2279     | gnl BL_ORD_ID 8785      cb7612_c0/f1p1/2574<br>isoform=cb7612_c0;full_length_coverage=1;non_full_length_coverage=1;isoform_length=2574;expected_accuracy=0.991            | 1   | 1684 | 1682 | 2183 | 40   | 172<br>0 | 2073 | 257<br>4 |
| cb8564_c7856/f2p2/3151  | gnl BL_ORD_ID 55036      cb8564_c4571/f1p0/3389<br>isoform=cb8564_c7856;full_length_coverage=2;non_full_length_coverage=2;isoform_length=3151;expected_accuracy=0.997     | 156 | 3151 | 12   | 153  | 340  | 333<br>4 | 7    | 149      |
| cb8564_c36689/f1p1/2368 | gnl BL_ORD_ID 55962      cb8564_c50282/f1p0/4402                                                                                                                          | 15  | 1709 | 1706 | 2368 | 1457 | 314      | 3642 | 430      |

|                                                                                                                     |                     |                         |      |      |      |      |      |      |      |      |
|---------------------------------------------------------------------------------------------------------------------|---------------------|-------------------------|------|------|------|------|------|------|------|------|
| isoform=cb8564_c36689;full_length_coverage=1;non_full_length_coverage=1;isoform_length=2368;expected_accuracy=0.991 |                     |                         |      |      |      |      |      | 3    |      | 6    |
| cb12422_c8/f1p1/1600                                                                                                |                     |                         |      |      |      |      |      |      |      |      |
| isoform=cb12422_c8;full_length_coverage=1;non_full_length_coverage=1;isoform_length=1600;expected_accuracy=0.996    | gnl BL_ORD_ID 61716 | cb12422_c17/f1p1/1730   | 281  | 1600 | 29   | 285  | 396  | 1716 | 29   | 285  |
| cb12714_c29/f1p2/1583                                                                                               | gnl BL_ORD_ID 52845 | cb8564_c15530/f1p0/3247 | 1    | 1296 | 1293 | 1597 | 6    | 1301 | 2823 | 3127 |
| cb8564_c72963/f1p0/2583                                                                                             | gnl BL_ORD_ID 58115 | cb8564_c89322/f1p0/2588 | 1    | 1279 | 1274 | 2367 | 1    | 1281 | 1494 | 2588 |
| cb8564_c52246/f1p1/2752                                                                                             | gnl BL_ORD_ID 14028 | cb8564_c31992/f2p0/4284 | 1    | 1284 | 1283 | 2494 | 14   | 1295 | 3049 | 4284 |
| isoform=cb8564_c31992;full_length_coverage=2;non_full_length_coverage=0;isoform_length=4284;expected_accuracy=0.997 |                     |                         |      |      |      |      |      |      |      |      |
| cb8564_c47011/f1p0/3100                                                                                             | gnl BL_ORD_ID 55894 | cb8564_c48160/f1p2/3308 | 11   | 2306 | 2301 | 2934 | 7    | 2317 | 2555 | 3188 |
| cb6063_c13/f1p1/2429                                                                                                | gnl BL_ORD_ID 45238 | cb6063_c0/f15p2/2941    | 119  | 2436 | 1    | 120  | 620  | 2937 | 119  | 238  |
| isoform=cb6063_c0;full_length_coverage=15;non_full_length_coverage=2;isoform_length=2941;expected_accuracy=1.000    |                     |                         |      |      |      |      |      |      |      |      |
| cb13515_c9/f1p0/1348                                                                                                | gnl BL_ORD_ID 26400 | cb13515_c10/f2p0/1494   | 1    | 1117 | 1114 | 1290 | 93   | 1208 | 1317 | 1494 |
| isoform=cb13515_c10;full_length_coverage=2;non_full_length_coverage=0;isoform_length=1494;expected_accuracy=0.997   |                     |                         |      |      |      |      |      |      |      |      |
| cb332_c3/f1p1/4544                                                                                                  | gnl BL_ORD_ID 39701 | cb332_c10/f2p0/5265     | 1989 | 4553 | 16   | 1994 | 2697 | 526  | 1    | 198  |



|                          |                                                                                                                                                                          |     |      |      |      |      |          |      |          |
|--------------------------|--------------------------------------------------------------------------------------------------------------------------------------------------------------------------|-----|------|------|------|------|----------|------|----------|
|                          | isoform=cb332_c10;full_length_coverage=2;non_full_length_coverage=0;isoform_length=5265;expected_accuracy=0.999                                                          |     |      |      |      |      |          | 5    | 5        |
| cb1788_c6/f1p0/3148      | gnl BL_ORD_ID 31765      cb1788_c0/f1p0/4170<br>isoform=cb1788_c0;full_length_coverage=1;non_full_length_coverage=0;isoform_length=4170;expected_accuracy=0.996          | 146 | 3063 | 1    | 148  | 1159 | 407<br>7 | 47   | 194      |
| cb8564_c148588/f5p0/2542 | isoform=cb8564_c148588;full_length_coverage=5;non_full_length_coverage=0;isoform_length=2542;expected_accuracy=1.000                                                     |     |      |      |      |      |          |      |          |
|                          | gnl BL_ORD_ID 55184      cb8564_c34882/f1p0/2687                                                                                                                         | 1   | 2212 | 2210 | 2523 | 3    | 221<br>4 | 2376 | 268<br>9 |
| cb4047_c8/f1p0/2511      | gnl BL_ORD_ID 40087      cb4047_c4/f3p2/2787<br>isoform=cb4047_c4;full_length_coverage=3;non_full_length_coverage=2;isoform_length=2787;expected_accuracy=0.999          | 1   | 1760 | 1756 | 2495 | 98   | 185<br>8 | 1981 | 272<br>0 |
| cb8564_c182028/f1p0/2513 | gnl BL_ORD_ID 18764      cb8564_c84695/f1p1/2710<br>isoform=cb8564_c182028;full_length_coverage=1;non_full_length_coverage=0;isoform_length=2513;expected_accuracy=0.996 | 1   | 1971 | 1968 | 2513 | 1    | 196<br>7 | 2111 | 265<br>8 |
| cb8564_c77371/f1p1/2767  | gnl BL_ORD_ID 13431      cb8564_c19588/f1p0/3337<br>isoform=cb8564_c19588;full_length_coverage=1;non_full_length_coverage=0;isoform_length=3337;expected_accuracy=0.997  | 18  | 2055 | 2055 | 2490 | 1    | 203<br>9 | 2902 | 333<br>7 |
| cb8564_c20519/f1p0/3425  | gnl BL_ORD_ID 13018      cb8564_c17689/f1p0/3643<br>isoform=cb8564_c20519;full_length_coverage=1;non_full_length_coverage=0;isoform_length=3425;expected_                | 1   | 1917 | 1913 | 3425 | 8    | 193<br>3 | 2038 | 355<br>1 |

|                                                                                                                  |                                                                                                                  |      |      |      |      |      |      |      |      |  |
|------------------------------------------------------------------------------------------------------------------|------------------------------------------------------------------------------------------------------------------|------|------|------|------|------|------|------|------|--|
| accuracy=0.994                                                                                                   | curacy=0.995                                                                                                     |      |      |      |      |      |      |      |      |  |
| cb16383_c7/f1p0/1854                                                                                             | gnl BL_ORD_ID 57305 cb8564_c89458/f2p0/3479                                                                      | 1    | 1027 | 1028 | 1848 | 1    | 1027 | 1158 | 1978 |  |
| cb7642_c53/f1p0/1947                                                                                             | gnl BL_ORD_ID 8873                      cb7642_c75/f1p1/2061                                                     |      |      |      |      |      |      |      |      |  |
| isoform=cb7642_c53;full_length_coverage=1;non_full_length_coverage=0;isoform_length=1947;expected_accuracy=0.990 | isoform=cb7642_c75;full_length_coverage=1;non_full_length_coverage=1;isoform_length=2061;expected_accuracy=0.997 | 1    | 1181 | 1178 | 1947 | 1    | 1159 | 1266 | 2036 |  |
| cb2770_c58/f1p0/3220                                                                                             | gnl BL_ORD_ID 68823 cb2770_c36/f1p0/3443                                                                         | 1    | 2347 | 2347 | 3165 | 12   | 2322 | 2423 | 3239 |  |
| isoform=cb2770_c58;full_length_coverage=1;non_full_length_coverage=0;isoform_length=3220;expected_accuracy=0.995 |                                                                                                                  |      |      |      |      |      |      |      |      |  |
| cb2533_c10/f1p0/2206                                                                                             | gnl BL_ORD_ID 38794                      cb2533_c9/f1p0/3092                                                     |      |      |      |      |      |      |      |      |  |
| isoform=cb2533_c10;full_length_coverage=1;non_full_length_coverage=0;isoform_length=2206;expected_accuracy=0.995 | isoform=cb2533_c9;full_length_coverage=1;non_full_length_coverage=0;isoform_length=3092;expected_accuracy=1.000  | 1    | 1146 | 1144 | 2200 | 39   | 1186 | 2060 | 3092 |  |
| cb3449_c13/f1p2/3050                                                                                             | gnl BL_ORD_ID 71216 cb3449_c35/f1p1/3670                                                                         | 1    | 2755 | 2752 | 3050 | 51   | 2806 | 2974 | 3273 |  |
| isoform=cb3449_c13;full_length_coverage=1;non_full_length_coverage=2;isoform_length=3050;expected_accuracy=0.993 |                                                                                                                  |      |      |      |      |      |      |      |      |  |
| cb90_c9/f1p0/4970                                                                                                | gnl BL_ORD_ID 20924                      cb90_c49/f1p0/5038                                                      |      |      |      |      |      |      |      |      |  |
| isoform=cb90_c9;full_length_coverage=1;non_full_length_coverage=0;isoform_length=4970;expected_accuracy=0.999    | isoform=cb90_c49;full_length_coverage=1;non_full_length_coverage=0;isoform_length=5038;expected_accuracy=0.998   | 1184 | 4889 | 1    | 1183 | 1333 | 5038 | 1    | 1179 |  |
| cb5457_c6/f1p0/1981                                                                                              | gnl BL_ORD_ID 44616                      cb5457_c3/f1p0/2089                                                     |      |      |      |      |      |      |      |      |  |
|                                                                                                                  | isoform=cb5457_c3;full_length_coverage=1;non_full_length_coverage=0;isoform_length=2089;expected_accuracy=0.999  | 1    | 1670 | 1670 | 1873 | 79   | 1748 | 1886 | 2089 |  |

|                                                                                                                     |                                                                                                                     |     |      |      |      |      |          |      |          |  |
|---------------------------------------------------------------------------------------------------------------------|---------------------------------------------------------------------------------------------------------------------|-----|------|------|------|------|----------|------|----------|--|
|                                                                                                                     | cy=0.995                                                                                                            |     |      |      |      |      |          |      |          |  |
| cb8564_c123664/f1p0/3544                                                                                            | gnl BL_ORD_ID 52107 cb8564_c111147/f1p0/3741                                                                        | 894 | 3376 | 93   | 895  | 1243 | 372<br>5 | 1    | 780      |  |
| cb3590_c7/f1p0/2823                                                                                                 |                                                                                                                     |     |      |      |      |      |          |      |          |  |
| isoform=cb3590_c7;full_length_coverage=1;non_full_length_coverage=0;isoform_length=2823;expected_accuracy=0.992     | gnl BL_ORD_ID 71358 cb3590_c4/f1p0/3544                                                                             | 1   | 2404 | 2402 | 2823 | 31   | 243<br>3 | 3111 | 353<br>1 |  |
| cb6474_c13/f1p0/1404                                                                                                | gnl BL_ORD_ID 4758 cb6474_c12/f1p0/1699                                                                             |     |      |      |      |      |          |      |          |  |
| isoform=cb6474_c13;full_length_coverage=1;non_full_length_coverage=0;isoform_length=1404;expected_accuracy=0.993    | isoform=cb6474_c12;full_length_coverage=1;non_full_length_coverage=0;isoform_length=1699;expected_accuracy=0.994    | 177 | 1404 | 6    | 180  | 322  | 154<br>9 | 6    | 171      |  |
| cb2737_c57/f1p0/2959                                                                                                | gnl BL_ORD_ID 36571 cb2737_c54/f1p0/3029                                                                            |     |      |      |      |      |          |      |          |  |
| isoform=cb2737_c54;full_length_coverage=1;non_full_length_coverage=0;isoform_length=3029;expected_accuracy=0.995    | isoform=cb2737_c54;full_length_coverage=1;non_full_length_coverage=0;isoform_length=3029;expected_accuracy=0.995    | 1   | 1981 | 1982 | 2862 | 25   | 199<br>8 | 2110 | 298<br>8 |  |
| cb8564_c114347/f1p0/2560                                                                                            | gnl BL_ORD_ID 14245 cb8564_c33844/f4p0/2678                                                                         |     |      |      |      |      |          |      |          |  |
| isoform=cb8564_c33844;full_length_coverage=4;non_full_length_coverage=0;isoform_length=2678;expected_accuracy=0.999 | isoform=cb8564_c33844;full_length_coverage=4;non_full_length_coverage=0;isoform_length=2678;expected_accuracy=0.999 | 1   | 1649 | 1648 | 2439 | 1    | 164<br>8 | 1876 | 266<br>7 |  |
| cb8564_c43779/f1p0/3021                                                                                             | gnl BL_ORD_ID 13575 cb8564_c20499/f3p0/3328                                                                         |     |      |      |      |      |          |      |          |  |
| isoform=cb8564_c43779;full_length_coverage=1;non_full_length_coverage=0;isoform_length=3021;expected_accuracy=0.993 | isoform=cb8564_c20499;full_length_coverage=3;non_full_length_coverage=0;isoform_length=3328;expected_accuracy=1.000 | 1   | 2344 | 2345 | 3021 | 1    | 234<br>5 | 2501 | 317<br>6 |  |
| cb4576_c58/f1p1/3963                                                                                                | gnl BL_ORD_ID 72706 cb4576_c62/f1p0/4079                                                                            | 426 | 3855 | 8    | 424  | 618  | 404<br>7 | 27   | 443      |  |
| cb18456_c3695/f1p0/1345                                                                                             | gnl BL_ORD_ID 13109 cb8564_c16444/f5p10/3053                                                                        | 1   | 1051 | 1047 | 1341 | 785  | 183      | 2010 | 230      |  |

|                                                                                                                     |                                                                                                                                                                    |     |      |      |      |      |      |      |      |   |
|---------------------------------------------------------------------------------------------------------------------|--------------------------------------------------------------------------------------------------------------------------------------------------------------------|-----|------|------|------|------|------|------|------|---|
|                                                                                                                     | isoform=cb8564_c16444;full_length_coverage=5;non_full_length_coverage=10;isoform_length=3053;expected_accuracy=0.992                                               |     |      |      |      |      |      | 5    |      | 4 |
| cb653_c9/f1p0/4025                                                                                                  |                                                                                                                                                                    |     |      |      |      |      |      |      |      |   |
| isoform=cb653_c9;full_length_coverage=1;non_full_length_coverage=0;isoform_length=4025;expected_accuracy=0.997      | gnl BL_ORD_ID 49383 cb653_c20/f1p2/4373                                                                                                                            | 301 | 4020 | 28   | 301  | 613  | 4328 | 70   | 341  |   |
| cb6732_c18/f1p0/2510                                                                                                | gnl BL_ORD_ID 49996 cb6732_c8/f1p1/2366                                                                                                                            | 621 | 2255 | 7    | 624  | 740  | 2374 | 1    | 625  |   |
| cb8564_c52278/f1p1/2746                                                                                             | gnl BL_ORD_ID 16045 cb8564_c75622/f1p0/3602<br>isoform=cb8564_c75622;full_length_coverage=1;non_full_length_coverage=0;isoform_length=3602;expected_accuracy=0.998 | 13  | 2426 | 2423 | 2701 | 1    | 2414 | 3327 | 3602 |   |
| cb10272_c3/f5p2/1680                                                                                                |                                                                                                                                                                    |     |      |      |      |      |      |      |      |   |
| isoform=cb10272_c3;full_length_coverage=5;non_full_length_coverage=2;isoform_length=1680;expected_accuracy=1.000    | gnl BL_ORD_ID 48324 cb10272_c11/f1p0/2538                                                                                                                          | 1   | 1148 | 1148 | 1623 | 1    | 1148 | 2015 | 2490 |   |
| cb1490_c6/f1p2/3547                                                                                                 | gnl BL_ORD_ID 30687 cb1490_c2/f1p1/4303<br>isoform=cb1490_c2;full_length_coverage=1;non_full_length_coverage=1;isoform_length=4303;expected_accuracy=0.994         | 1   | 2094 | 2091 | 3423 | 457  | 2550 | 2942 | 4272 |   |
| cb8564_c35607/f1p0/2587                                                                                             |                                                                                                                                                                    |     |      |      |      |      |      |      |      |   |
| isoform=cb8564_c35607;full_length_coverage=1;non_full_length_coverage=0;isoform_length=2587;expected_accuracy=0.993 | gnl BL_ORD_ID 14942 cb8564_c34188/f2p3/4546<br>isoform=cb8564_c34188;full_length_coverage=2;non_full_length_coverage=3;isoform_length=4546;expected_accuracy=1.000 | 1   | 1685 | 1685 | 2581 | 1721 | 3402 | 3651 | 4546 |   |
| cb7493_c4/f1p0/2146                                                                                                 | gnl BL_ORD_ID 6865 cb7493_c1/f1p0/2337                                                                                                                             | 1   | 1712 | 1710 | 2121 | 1    | 170  | 1864 | 227  |   |

|                                                                                                                      |                                                                                                                     |     |      |      |      |     |      |      |  |      |
|----------------------------------------------------------------------------------------------------------------------|---------------------------------------------------------------------------------------------------------------------|-----|------|------|------|-----|------|------|--|------|
|                                                                                                                      | isoform=cb7493_c1;full_length_coverage=1;non_full_length_coverage=0;isoform_length=2337;expected_accuracy=0.999     |     |      |      |      |     |      | 7    |  | 7    |
| cb2966_c1/f2p0/2466                                                                                                  | gnl BL_ORD_ID 38223      cb2966_c4/f1p0/2868                                                                        |     |      |      |      |     |      |      |  |      |
| isoform=cb2966_c1;full_length_coverage=2;non_full_length_coverage=0;isoform_length=2466;expected_accuracy=0.999      | isoform=cb2966_c4;full_length_coverage=1;non_full_length_coverage=0;isoform_length=2868;expected_accuracy=0.997     | 162 | 2466 | 1    | 165  | 533 | 2834 | 2    |  | 163  |
| cb8564_c51533/f1p0/2888                                                                                              | gnl BL_ORD_ID 15949      cb8564_c47887/f1p0/3477                                                                    |     |      |      |      |     |      |      |  |      |
| isoform=cb8564_c51533;full_length_coverage=1;non_full_length_coverage=0;isoform_length=2888;expected_accuracy=0.998  | isoform=cb8564_c47887;full_length_coverage=1;non_full_length_coverage=0;isoform_length=3477;expected_accuracy=0.994 | 240 | 2884 | 20   | 239  | 858 | 3477 | 1    |  | 220  |
| cb8564_c177392/f1p0/2423                                                                                             |                                                                                                                     |     |      |      |      |     |      |      |  |      |
| isoform=cb8564_c177392;full_length_coverage=1;non_full_length_coverage=0;isoform_length=2423;expected_accuracy=0.996 | gnl BL_ORD_ID 55328      cb8564_c38464/f1p0/2918                                                                    | 1   | 1751 | 1754 | 2406 | 1   | 1751 | 1944 |  | 2596 |
| cb8564_c23232/f1p3/2540                                                                                              | gnl BL_ORD_ID 53102      cb8564_c116328/f1p6/2732                                                                   | 16  | 2172 | 2167 | 2518 | 4   | 2160 | 2262 |  | 2613 |
| cb8564_c15653/f1p4/2475                                                                                              | gnl BL_ORD_ID 58171      cb8564_c90592/f1p0/2863                                                                    | 2   | 2293 | 2289 | 2435 | 3   | 2272 | 2416 |  | 2562 |
| cb8564_c83196/f1p0/2505                                                                                              | gnl BL_ORD_ID 15583      cb8564_c76490/f3p1/3602                                                                    |     |      |      |      |     |      |      |  |      |
| isoform=cb8564_c83196;full_length_coverage=1;non_full_length_coverage=0;isoform_length=2505;expected_accuracy=0.995  | isoform=cb8564_c76490;full_length_coverage=3;non_full_length_coverage=1;isoform_length=3602;expected_accuracy=0.997 | 1   | 1642 | 1642 | 2505 | 908 | 2550 | 2663 |  | 3526 |
| cb7649_c16/f1p0/1932                                                                                                 | gnl BL_ORD_ID 6350      cb7649_c4/f1p0/2573                                                                         |     |      |      |      |     |      |      |  |      |
| isoform=cb7649_c16;full_length_coverage=1;non_full_length_coverage=0;isoform_length=1932;expected_accuracy=0.999     | isoform=cb7649_c4;full_length_coverage=1;non_full_length_coverage=0;isoform_length=2573;expected_accuracy=0.999     | 1   | 1081 | 1076 | 1932 | 1   | 1083 | 1694 |  | 2551 |

|                          |                                                                                                                                                                           |     |      |      |      |     |      |      |      |
|--------------------------|---------------------------------------------------------------------------------------------------------------------------------------------------------------------------|-----|------|------|------|-----|------|------|------|
| racy=0.999               | cy=0.999                                                                                                                                                                  |     |      |      |      |     |      |      |      |
| cb8564_c75977/f1p0/2165  | gnl BL_ORD_ID 19213      cb8564_c85031/f2p0/4106<br>isoform=cb8564_c85031;full_length_coverage=2;non_full_length_coverage=0;isoform_length=4106;expected_accuracy=0.997   | 1   | 1393 | 1394 | 2130 | 1   | 1393 | 2681 | 3417 |
| cb8564_c90372/f1p0/2157  | gnl BL_ORD_ID 18990      cb8564_c79575/f2p0/2489<br>isoform=cb8564_c90372;full_length_coverage=1;non_full_length_coverage=0;isoform_length=2157;expected_accuracy=0.994   | 1   | 1092 | 1088 | 2157 | 99  | 1191 | 1362 | 2432 |
| cb151_c2/f1p0/4262       | gnl BL_ORD_ID 30049      cb151_c3/f1p1/4867<br>isoform=cb151_c2;full_length_coverage=1;non_full_length_coverage=0;isoform_length=4262;expected_accuracy=0.992             | 307 | 4257 | 1    | 308  | 911 | 4867 | 231  | 523  |
| cb1065_c12/f1p0/2107     | gnl BL_ORD_ID 1631      cb1065_c8/f1p0/2427<br>isoform=cb1065_c12;full_length_coverage=1;non_full_length_coverage=0;isoform_length=2107;expected_accuracy=0.998           | 1   | 1093 | 1091 | 2106 | 9   | 1098 | 1319 | 2341 |
| cb8564_c188097/f1p0/2552 | gnl BL_ORD_ID 11483      cb8564_c12665/f1p15/2806<br>isoform=cb8564_c188097;full_length_coverage=1;non_full_length_coverage=0;isoform_length=2552;expected_accuracy=0.996 | 1   | 1945 | 1940 | 2550 | 2   | 1952 | 2055 | 2667 |
| cb8564_c3927/f1p1/2747   | gnl BL_ORD_ID 14937      cb8564_c3938/f4p2/3036<br>isoform=cb8564_c3927;full_length_coverage=1;non_full_length_coverage=1;isoform_length=2747;expected_accuracy=0.995     | 1   | 1593 | 1593 | 2747 | 36  | 1628 | 1754 | 2908 |
| cb8564_c35063/f1p0/3277  | gnl BL_ORD_ID 56063      cb8564_c53906/f1p0/3730                                                                                                                          | 1   | 2629 | 2632 | 3132 | 24  | 265  | 2841 | 334  |

|                                                                                                                     |                                                                                                                     |                         |      |      |      |      |      |      |      |      |
|---------------------------------------------------------------------------------------------------------------------|---------------------------------------------------------------------------------------------------------------------|-------------------------|------|------|------|------|------|------|------|------|
| cb2893_c2/f1p0/1401                                                                                                 | gnl BL_ORD_ID 38659                                                                                                 | cb2893_c1/f1p0/1726     |      |      |      |      |      | 2    | 1    |      |
| isoform=cb2893_c2;full_length_coverage=1;non_full_length_coverage=0;isoform_length=1401;expected_accuracy=0.996     | isoform=cb2893_c1;full_length_coverage=1;non_full_length_coverage=0;isoform_length=1726;expected_accuracy=0.999     |                         | 1    | 1239 | 1239 | 1401 | 7    | 1245 | 1517 | 1679 |
| cb8564_c79661/f1p0/2314                                                                                             | gnl BL_ORD_ID 17021                                                                                                 | cb8564_c73064/f2p0/2574 |      |      |      |      |      |      |      |      |
| isoform=cb8564_c79661;full_length_coverage=1;non_full_length_coverage=0;isoform_length=2314;expected_accuracy=0.994 | isoform=cb8564_c73064;full_length_coverage=2;non_full_length_coverage=0;isoform_length=2574;expected_accuracy=0.996 |                         | 1    | 1332 | 1333 | 2314 | 1    | 1339 | 1454 | 2442 |
| cb5896_c135/f1p0/4855                                                                                               | gnl BL_ORD_ID 44452                                                                                                 | cb5896_c134/f1p0/4910   |      |      |      |      |      |      |      |      |
| isoform=cb5896_c135;full_length_coverage=1;non_full_length_coverage=0;isoform_length=4855;expected_accuracy=0.995   | isoform=cb5896_c134;full_length_coverage=1;non_full_length_coverage=0;isoform_length=4910;expected_accuracy=0.999   |                         | 224  | 2796 | 2796 | 4855 | 1    | 2572 | 2815 | 4870 |
| cb8564_c35645/f1p0/2804                                                                                             | gnl BL_ORD_ID 56712                                                                                                 | cb8564_c53711/f1p0/3201 |      |      |      |      |      |      |      |      |
| isoform=cb6346_c2;full_length_coverage=1;non_full_length_coverage=0;isoform_length=2403;expected_accuracy=0.993     | isoform=cb5896_c134;full_length_coverage=1;non_full_length_coverage=0;isoform_length=4910;expected_accuracy=0.999   |                         | 150  | 2726 | 1    | 151  | 302  | 2878 | 39   | 189  |
| cb6346_c2/f1p0/2403                                                                                                 | gnl BL_ORD_ID 49634                                                                                                 | cb6346_c1/f1p0/2878     |      |      |      |      |      |      |      |      |
| isoform=cb6346_c2;full_length_coverage=1;non_full_length_coverage=0;isoform_length=2403;expected_accuracy=0.993     | isoform=cb6346_c1;full_length_coverage=1;non_full_length_coverage=0;isoform_length=2878;expected_accuracy=0.993     |                         | 1138 | 2403 | 10   | 1142 | 1247 | 2512 | 1    | 1134 |
| cb8564_c34060/f2p0/3214                                                                                             | gnl BL_ORD_ID 56041                                                                                                 | cb8564_c53077/f1p2/3406 |      |      |      |      |      |      |      |      |
| isoform=cb8564_c34060;full_length_coverage=2;non_full_length_coverage=0;isoform_length=3214;expected_accuracy=0.993 | isoform=cb8564_c53077;full_length_coverage=2;non_full_length_coverage=0;isoform_length=3406;expected_accuracy=0.993 |                         | 368  | 3214 | 57   | 368  | 452  | 3287 | 41   | 337  |
| cb1913_c44/f1p0/2236                                                                                                | gnl BL_ORD_ID 66489                                                                                                 | cb1913_c39/f1p0/2723    |      |      |      |      |      |      |      |      |
| isoform=cb1913_c44;full_length_coverage=1;non_full_length_coverage=0;isoform_length=2236;expected_accuracy=0.993    | isoform=cb1913_c39;full_length_coverage=1;non_full_length_coverage=0;isoform_length=2723;expected_accuracy=0.993    |                         | 1    | 1634 | 1630 | 2236 | 193  | 1825 | 1950 | 2568 |

|                                                                                                                  |                                                                                                                      |                          |     |      |      |      |     |      |      |     |
|------------------------------------------------------------------------------------------------------------------|----------------------------------------------------------------------------------------------------------------------|--------------------------|-----|------|------|------|-----|------|------|-----|
| racy=0.998                                                                                                       |                                                                                                                      |                          |     |      |      |      |     |      |      |     |
| cb2737_c54/f1p0/3029                                                                                             | gnl BL_ORD_ID 36732                                                                                                  | cb2737_c15/f1p0/3303     |     |      |      |      |     |      |      |     |
| isoform=cb2737_c54;full_length_coverage=1;non_full_length_coverage=0;isoform_length=3029;expected_accuracy=0.995 | isoform=cb2737_c15;full_length_coverage=1;non_full_length_coverage=0;isoform_length=3303;expected_accuracy=0.995     |                          | 112 | 1625 | 1623 | 3029 | 1   | 152  | 1870 | 326 |
|                                                                                                                  |                                                                                                                      |                          |     |      |      |      |     | 1    |      | 3   |
| cb8569_c9/f1p0/2101                                                                                              | gnl BL_ORD_ID 57419                                                                                                  | cb8569_c7/f1p0/3650      | 1   | 1036 | 1037 | 2071 | 164 | 1199 | 2616 | 365 |
|                                                                                                                  |                                                                                                                      |                          |     |      |      |      |     |      |      | 0   |
| cb9867_c3/f1p0/1688                                                                                              | gnl BL_ORD_ID 60040                                                                                                  | cb9867_c2/f1p0/1954      | 1   | 1050 | 1047 | 1688 | 40  | 109  | 1231 | 187 |
| isoform=cb9867_c3;full_length_coverage=1;non_full_length_coverage=0;isoform_length=1688;expected_accuracy=0.993  |                                                                                                                      |                          |     |      |      |      |     | 5    |      | 9   |
| cb18275_c9/f1p1/1709                                                                                             | gnl BL_ORD_ID 11253                                                                                                  | cb8564_c151174/f1p2/2106 |     |      |      |      |     |      |      |     |
| isoform=cb18275_c9;full_length_coverage=1;non_full_length_coverage=1;isoform_length=1709;expected_accuracy=0.993 | isoform=cb8564_c151174;full_length_coverage=1;non_full_length_coverage=2;isoform_length=2106;expected_accuracy=0.997 |                          | 162 | 1709 | 1    | 166  | 398 | 194  | 133  | 298 |
|                                                                                                                  |                                                                                                                      |                          |     |      |      |      |     | 5    |      |     |
| cb4163_c10/f1p0/2735                                                                                             | gnl BL_ORD_ID 43708                                                                                                  | cb4163_c16/f4p0/2920     |     |      |      |      |     |      |      |     |
| isoform=cb4163_c10;full_length_coverage=1;non_full_length_coverage=0;isoform_length=2735;expected_accuracy=0.995 | isoform=cb4163_c16;full_length_coverage=4;non_full_length_coverage=0;isoform_length=2920;expected_accuracy=1.000     |                          | 1   | 1840 | 1841 | 2735 | 2   | 184  | 1988 | 288 |
|                                                                                                                  |                                                                                                                      |                          |     |      |      |      |     | 1    |      | 5   |
| cb295_c26/f1p1/1869                                                                                              | gnl BL_ORD_ID 36781                                                                                                  | cb295_c59/f1p4/2024      | 1   | 1359 | 1358 | 1857 | 1   | 136  | 1499 | 200 |
|                                                                                                                  | isoform=cb295_c59;full_length_coverage=1;non_full_length_coverage=4;isoform_length=2024;expected_accuracy=0.993      |                          |     |      |      |      |     | 8    |      | 3   |
| cb897_c30/f1p0/2403                                                                                              | gnl BL_ORD_ID 21670                                                                                                  | cb897_c17/f1p0/3323      |     |      |      |      |     |      |      |     |
| isoform=cb897_c30;full_length_coverage=1;non_full_length_coverage=0;isoform_length=2403;expected_accuracy=0.995  | isoform=cb897_c17;full_length_coverage=1;non_full_length_coverage=0;isoform_length=3323;expected_accuracy=0.995      |                          | 1   | 2273 | 2270 | 2403 | 42  | 232  | 3052 | 318 |
|                                                                                                                  |                                                                                                                      |                          |     |      |      |      |     | 7    |      | 4   |



|                                                                                                                      |                                                                                                                 |      |      |      |      |      |      |      |     |   |
|----------------------------------------------------------------------------------------------------------------------|-----------------------------------------------------------------------------------------------------------------|------|------|------|------|------|------|------|-----|---|
| acy=0.997                                                                                                            | cy=0.994                                                                                                        |      |      |      |      |      |      |      |     |   |
| cb944_c92/f1p0/1128                                                                                                  | gnl BL_ORD_ID 59113 cb944_c85/f1p1/1255                                                                         | 8    | 693  | 688  | 1139 | 1    | 687  | 789  | 125 | 3 |
| cb8564_c21764/f1p0/2599                                                                                              | gnl BL_ORD_ID 57107 cb8564_c83478/f1p0/3224                                                                     | 1    | 2030 | 2030 | 2619 | 3    | 2030 | 1914 | 250 | 3 |
| cb7400_c0/f3p1/2300                                                                                                  |                                                                                                                 |      |      |      |      |      |      |      |     |   |
| isoform=cb7400_c0;full_length_coverage=3;non_full_length_coverage=1;isoform_length=2300;expected_accuracy=1.000      | gnl BL_ORD_ID 50505 cb7400_c8/f1p0/2474                                                                         | 1    | 1661 | 1662 | 2300 | 48   | 1705 | 1845 | 247 | 6 |
| cb8564_c178999/f1p0/2222                                                                                             |                                                                                                                 |      |      |      |      |      |      |      |     |   |
| isoform=cb8564_c178999;full_length_coverage=1;non_full_length_coverage=0;isoform_length=2222;expected_accuracy=0.994 | gnl BL_ORD_ID 55182 cb8564_c34825/f1p2/3200                                                                     | 16   | 1778 | 1773 | 2222 | 6    | 1791 | 2749 | 319 | 7 |
| cb1626_c14/f1p0/2173                                                                                                 | gnl BL_ORD_ID 32074 cb1626_c4/f2p1/4537                                                                         |      |      |      |      |      |      |      |     |   |
| isoform=cb1626_c14;full_length_coverage=1;non_full_length_coverage=0;isoform_length=2173;expected_accuracy=0.999     | isoform=cb1626_c4;full_length_coverage=2;non_full_length_coverage=1;isoform_length=4537;expected_accuracy=0.998 | 1001 | 2168 | 1    | 1002 | 3370 | 4537 | 54   | 107 | 0 |
| cb8564_c47853/f1p0/2927                                                                                              |                                                                                                                 |      |      |      |      |      |      |      |     |   |
| isoform=cb8564_c47853;full_length_coverage=1;non_full_length_coverage=0;isoform_length=2927;expected_accuracy=0.991  | gnl BL_ORD_ID 55920 cb8564_c48949/f1p0/4357                                                                     | 1    | 2271 | 2272 | 2927 | 2    | 2293 | 2847 | 350 | 4 |
| cb8564_c186356/f1p0/2744                                                                                             |                                                                                                                 |      |      |      |      |      |      |      |     |   |
| isoform=cb8564_c186356;full_length_coverage=1;non_full_length_coverage=0;isoform_length=2744;expected_accuracy=0.998 | gnl BL_ORD_ID 55866 cb8564_c47522/f1p0/2954                                                                     | 1393 | 2744 | 1    | 1396 | 1495 | 2846 | 1    | 137 | 5 |
| cb8564_c54206/f2p0/3081                                                                                              | gnl BL_ORD_ID 15354 cb8564_c45229/f4p1/3393                                                                     | 1    | 1805 | 1804 | 3081 | 149  | 195  | 2114 | 339 |   |

|                                                                                                                                             |                                                                                                                                                                                 |     |      |      |      |      |      |      |      |   |
|---------------------------------------------------------------------------------------------------------------------------------------------|---------------------------------------------------------------------------------------------------------------------------------------------------------------------------------|-----|------|------|------|------|------|------|------|---|
| isoform=cb8564_c54206;full_length_coverage=2;non_full_length_coverage=0;isoform_length=3081;expected_accuracy=0.997<br>cb14897_c1/f2p3/1721 | isoform=cb8564_c45229;full_length_coverage=4;non_full_length_coverage=1;isoform_length=3393;expected_accuracy=0.999                                                             |     |      |      |      |      |      | 3    |      | 3 |
| isoform=cb14897_c1;full_length_coverage=2;non_full_length_coverage=3;isoform_length=1721;expected_accuracy=1.000<br>cb373_c13/f1p0/3706     | gnl BL_ORD_ID 53163 cb8564_c117857/f1p1/2890                                                                                                                                    | 1   | 1296 | 1296 | 1700 | 28   | 1327 | 2470 | 2876 |   |
| isoform=cb373_c13;full_length_coverage=1;non_full_length_coverage=0;isoform_length=3706;expected_accuracy=0.995<br>cb8564_c4906/f1p0/2813   | gnl BL_ORD_ID 40700                      cb373_c7/f1p0/3964<br>isoform=cb373_c7;full_length_coverage=1;non_full_length_coverage=0;isoform_length=3964;expected_accuracy=0.995   | 173 | 3645 | 1    | 173  | 490  | 3964 | 6    | 179  |   |
| cb8564_c180116/f1p0/2944                                                                                                                    | gnl BL_ORD_ID 55701 cb8564_c4898/f1p0/3489                                                                                                                                      | 1   | 2313 | 2312 | 2743 | 37   | 2349 | 2843 | 3274 |   |
| isoform=cb8564_c180116;full_length_coverage=1;non_full_length_coverage=0;isoform_length=2944;expected_accuracy=0.996<br>cb4652_c6/f1p0/1797 | gnl BL_ORD_ID 53680 cb8564_c153222/f2p39/3454                                                                                                                                   | 1   | 2522 | 2520 | 2936 | 4    | 2525 | 2754 | 3170 |   |
| isoform=cb4652_c6;full_length_coverage=1;non_full_length_coverage=0;isoform_length=1797;expected_accuracy=0.993<br>cb2804_c109/f1p0/1890    | gnl BL_ORD_ID 43334                      cb4652_c3/f1p0/1920<br>isoform=cb4652_c3;full_length_coverage=1;non_full_length_coverage=0;isoform_length=1920;expected_accuracy=1.000 | 231 | 1790 | 47   | 233  | 361  | 1920 | 7    | 193  |   |
| isoform=cb2804_c109;full_length_coverage=1;non_full_length_coverage=0;isoform_length=1890;expected_accuracy=0.996<br>cb373_c13/f1p0/3706    | gnl BL_ORD_ID 68883 cb2804_c151/f1p0/2463                                                                                                                                       | 184 | 1890 | 1    | 183  | 1    | 1695 | 1870 | 2052 |   |
|                                                                                                                                             | gnl BL_ORD_ID 40699                      cb373_c6/f1p0/4615                                                                                                                     | 173 | 3663 | 1    | 173  | 1118 | 461  | 1    | 173  |   |

|                                                                                                                     |                                                                                                                     |      |      |      |      |      |     |      |      |  |
|---------------------------------------------------------------------------------------------------------------------|---------------------------------------------------------------------------------------------------------------------|------|------|------|------|------|-----|------|------|--|
| isoform=cb373_c13;full_length_coverage=1;non_full_length_coverage=0;isoform_length=3706;expected_accuracy=0.995     | isoform=cb373_c6;full_length_coverage=1;non_full_length_coverage=0;isoform_length=4615;expected_accuracy=0.997      |      |      |      |      |      |     | 5    |      |  |
| cb4066_c13/f1p0/2044                                                                                                | gnl BL_ORD_ID 71763 cb4066_c12/f1p0/2290                                                                            | 12   | 1242 | 1242 | 2028 | 1    | 123 | 1468 | 225  |  |
| cb8564_c87721/f1p0/2168                                                                                             | gnl BL_ORD_ID 16335 cb8564_c72599/f1p2/2911                                                                         |      |      |      |      |      |     |      |      |  |
| isoform=cb8564_c87721;full_length_coverage=1;non_full_length_coverage=0;isoform_length=2168;expected_accuracy=0.997 | isoform=cb8564_c72599;full_length_coverage=1;non_full_length_coverage=2;isoform_length=2911;expected_accuracy=0.997 | 1    | 1811 | 1809 | 2107 | 148  | 196 | 2613 | 2911 |  |
| cb850_c28/f1p0/3553                                                                                                 | gnl BL_ORD_ID 11099 cb850_c13/f1p1/4040                                                                             |      |      |      |      |      |     |      |      |  |
| isoform=cb850_c28;full_length_coverage=1;non_full_length_coverage=0;isoform_length=3553;expected_accuracy=0.992     | isoform=cb850_c13;full_length_coverage=1;non_full_length_coverage=1;isoform_length=4040;expected_accuracy=0.994     | 303  | 3553 | 1    | 307  | 636  | 385 | 193  | 496  |  |
| cb7902_c11/f1p0/1255                                                                                                | gnl BL_ORD_ID 8205 cb7902_c6/f1p0/2164                                                                              |      |      |      |      |      |     |      |      |  |
| isoform=cb7902_c6;full_length_coverage=1;non_full_length_coverage=0;isoform_length=2164;expected_accuracy=0.990     | isoform=cb7902_c6;full_length_coverage=1;non_full_length_coverage=0;isoform_length=2164;expected_accuracy=0.990     | 549  | 1152 | 8    | 550  | 1557 | 216 | 1    | 543  |  |
| cb8564_c43979/f1p0/2026                                                                                             | gnl BL_ORD_ID 18120 cb8564_c92186/f1p0/2894                                                                         |      |      |      |      |      |     |      |      |  |
| isoform=cb8564_c92186;full_length_coverage=1;non_full_length_coverage=0;isoform_length=2894;expected_accuracy=0.994 | isoform=cb8564_c92186;full_length_coverage=1;non_full_length_coverage=0;isoform_length=2894;expected_accuracy=0.994 | 224  | 2036 | 6    | 227  | 1046 | 285 | 5    | 232  |  |
| cb5183_c115/f1p0/1016                                                                                               | gnl BL_ORD_ID 41757 cb5183_c122/f163p6/1859                                                                         |      |      |      |      |      |     |      |      |  |
| isoform=cb5183_c122;full_length_coverage=163;non_full_length_coverage=6;isoform_length=1859;expected_accuracy=1.000 | isoform=cb5183_c122;full_length_coverage=163;non_full_length_coverage=6;isoform_length=1859;expected_accuracy=1.000 | 326  | 1016 | 4    | 330  | 1047 | 173 | 112  | 438  |  |
| cb8564_c109931/f3p0/2132                                                                                            | gnl BL_ORD_ID 11188 cb8564_c114244/f1p0/3314                                                                        |      |      |      |      |      |     |      |      |  |
|                                                                                                                     |                                                                                                                     | 1031 | 2124 | 1    | 1034 | 2221 | 331 | 12   | 104  |  |

|                                                                                                                      |                                                                                                                                                                                          |    |      |      |      |      |     |      |     |
|----------------------------------------------------------------------------------------------------------------------|------------------------------------------------------------------------------------------------------------------------------------------------------------------------------------------|----|------|------|------|------|-----|------|-----|
| isoform=cb8564_c109931;full_length_coverage=3;non_full_length_coverage=0;isoform_length=2132;expected_accuracy=1.000 | isoform=cb8564_c114244;full_length_coverage=1;non_full_length_coverage=0;isoform_length=3314;expected_accuracy=0.998                                                                     |    |      |      |      |      |     | 4    | 4   |
| cb1956_c18/f1p0/2183                                                                                                 | gnl BL_ORD_ID 36250                      cb1956_c4/f3p0/3816<br>isoform=cb1956_c4;full_length_coverage=3;non_full_length_coverage=0;isoform_length=3816;expected_accuracy=0.997          | 1  | 1918 | 1918 | 2182 | 646  | 256 | 2699 | 296 |
| cb1415_c16/f1p0/3004                                                                                                 | gnl BL_ORD_ID 27157                      cb1415_c6/f1p0/4270<br>isoform=cb1415_c6;full_length_coverage=1;non_full_length_coverage=0;isoform_length=3004;expected_accuracy=0.995          | 1  | 1469 | 1464 | 3004 | 55   | 152 | 2386 | 394 |
| cb8564_c11592/f1p0/4735                                                                                              | gnl BL_ORD_ID 35344                      cb18654_c17/f1p0/6253<br>isoform=cb8564_c11592;full_length_coverage=1;non_full_length_coverage=0;isoform_length=4735;expected_accuracy=0.997    | 1  | 4169 | 4169 | 4564 | 1215 | 540 | 5858 | 625 |
| cb1306_c36/f1p0/2164                                                                                                 | gnl BL_ORD_ID 61217   cb1306_c28/f1p0/5943<br>isoform=cb1306_c36;full_length_coverage=1;non_full_length_coverage=0;isoform_length=2164;expected_accuracy=1.000                           | 1  | 1793 | 1788 | 2123 | 2804 | 459 | 5521 | 585 |
| cb8564_c15653/f1p4/2475                                                                                              | gnl BL_ORD_ID 56007   cb8564_c51870/f1p2/2815                                                                                                                                            | 22 | 2293 | 2289 | 2432 | 82   | 235 | 2572 | 271 |
| cb8564_c180116/f1p0/2944                                                                                             | gnl BL_ORD_ID 16681                      cb8564_c54233/f1p1/3194<br>isoform=cb8564_c180116;full_length_coverage=1;non_full_length_coverage=0;isoform_length=2944;expected_accuracy=0.996 | 1  | 2522 | 2520 | 2944 | 4    | 254 | 2770 | 319 |
| cb435_c9/f1p0/4856                                                                                                   | gnl BL_ORD_ID 72171   cb435_c8/f1p0/5270                                                                                                                                                 | 18 | 4346 | 4344 | 4730 | 1    | 433 | 4896 | 528 |

|                                                                                                                      |                                                                                                                     |                         |      |      |      |      |      |      |      |      |
|----------------------------------------------------------------------------------------------------------------------|---------------------------------------------------------------------------------------------------------------------|-------------------------|------|------|------|------|------|------|------|------|
| cb14630_c37/f1p1/5449                                                                                                | gnl BL_ORD_ID 30225                                                                                                 | cb14630_c41/f1p4/5749   |      |      |      |      |      | 1    | 2    |      |
| isoform=cb14630_c37;full_length_coverage=1;non_full_length_coverage=1;isoform_length=5449;expected_accuracy=0.996    | isoform=cb14630_c41;full_length_coverage=19;non_full_length_coverage=4;isoform_length=5749;expected_accuracy=1.000  |                         | 1    | 4273 | 4268 | 5449 | 84   | 4366 | 4539 | 5720 |
| cb8564_c38035/f1p0/2770                                                                                              | gnl BL_ORD_ID 54438                                                                                                 | cb8564_c46124/f1p0/3383 | 1    | 2035 | 2033 | 2754 | 151  | 2188 | 2378 | 3104 |
| cb8564_c36731/f1p2/2761                                                                                              | gnl BL_ORD_ID 55472                                                                                                 | cb8564_c42531/f1p0/3996 | 125  | 1977 | 1972 | 2736 | 816  | 2669 | 3098 | 3863 |
| cb1545_c23/f1p0/3408                                                                                                 | gnl BL_ORD_ID 63732                                                                                                 | cb1545_c19/f1p0/3724    | 10   | 1992 | 1991 | 3195 | 7    | 1988 | 2235 | 3439 |
| cb6925_c3/f1p0/2046                                                                                                  | gnl BL_ORD_ID 5120                                                                                                  | cb6925_c2/f1p0/2330     |      |      |      |      |      |      |      |      |
| isoform=cb6925_c2;full_length_coverage=1;non_full_length_coverage=0;isoform_length=2330;expected_accuracy=0.994      | isoform=cb6925_c2;full_length_coverage=1;non_full_length_coverage=0;isoform_length=2330;expected_accuracy=0.994     |                         | 100  | 1197 | 1193 | 2056 | 31   | 1130 | 1428 | 2292 |
| cb8620_c0/f1p0/2318                                                                                                  | gnl BL_ORD_ID 57454                                                                                                 | cb8620_c1/f1p0/2443     | 1    | 1434 | 1429 | 2184 | 2    | 1435 | 1688 | 2443 |
| cb8564_c185920/f1p0/2777                                                                                             | gnl BL_ORD_ID 14556                                                                                                 | cb8564_c45150/f1p0/2940 |      |      |      |      |      |      |      |      |
| isoform=cb8564_c185920;full_length_coverage=1;non_full_length_coverage=0;isoform_length=2777;expected_accuracy=0.996 | isoform=cb8564_c45150;full_length_coverage=1;non_full_length_coverage=0;isoform_length=2940;expected_accuracy=0.992 |                         | 174  | 2777 | 1    | 178  | 347  | 2935 | 14   | 192  |
| cb8564_c40107/f1p0/4108                                                                                              | gnl BL_ORD_ID 55964                                                                                                 | cb8564_c50435/f1p0/4916 | 1603 | 3955 | 1    | 1599 | 1494 | 3846 | 16   | 1614 |
| cb8564_c52738/f1p0/3595                                                                                              | gnl BL_ORD_ID 56035                                                                                                 | cb8564_c52940/f1p2/3963 | 14   | 2316 | 2315 | 3445 | 5    | 2302 | 2793 | 3922 |
| cb8564_c18587/f1p1/2159                                                                                              | gnl BL_ORD_ID 11450                                                                                                 | cb8564_c12878/f1p1/3352 | 562  | 2055 | 9    | 564  | 1869 | 335  | 1    | 555  |

|                                                                                                                      |                                                                                                                     |                         |      |      |      |     |      |      |      |
|----------------------------------------------------------------------------------------------------------------------|---------------------------------------------------------------------------------------------------------------------|-------------------------|------|------|------|-----|------|------|------|
|                                                                                                                      | isoform=cb8564_c12878;full_length_coverage=1;non_full_length_coverage=1;isoform_length=3352;expected_accuracy=0.995 |                         |      |      |      |     |      |      | 2    |
| cb9467_c89/f2p0/1589                                                                                                 | gnl BL_ORD_ID 21842                                                                                                 | cb9467_c46/f1p0/2279    |      |      |      |     |      |      |      |
| isoform=cb9467_c89;full_length_coverage=2;non_full_length_coverage=0;isoform_length=1589;expected_accuracy=0.993     | isoform=cb9467_c46;full_length_coverage=1;non_full_length_coverage=0;isoform_length=2279;expected_accuracy=0.992    | 1                       | 1171 | 1169 | 1589 | 436 | 1609 | 1855 | 2275 |
| cb2225_c5/f1p0/3503                                                                                                  | gnl BL_ORD_ID 38789                                                                                                 | cb2225_c1/f2p0/3544     |      |      |      |     |      |      |      |
| isoform=cb2225_c5;full_length_coverage=1;non_full_length_coverage=0;isoform_length=3503;expected_accuracy=0.997      | isoform=cb2225_c1;full_length_coverage=2;non_full_length_coverage=0;isoform_length=3544;expected_accuracy=0.998     | 1                       | 3136 | 3136 | 3354 | 55  | 3192 | 3326 | 3544 |
| cb8564_c148897/f2p2/3139                                                                                             | gnl BL_ORD_ID 13766                                                                                                 | cb8564_c18520/f2p0/3299 |      |      |      |     |      |      |      |
| isoform=cb8564_c148897;full_length_coverage=2;non_full_length_coverage=2;isoform_length=3139;expected_accuracy=0.997 | isoform=cb8564_c18520;full_length_coverage=2;non_full_length_coverage=0;isoform_length=3299;expected_accuracy=0.992 | 1                       | 2088 | 2088 | 3139 | 2   | 2089 | 2198 | 3245 |
| cb2686_c4/f1p0/2023                                                                                                  | gnl BL_ORD_ID 38040                                                                                                 | cb2686_c5/f1p0/3171     |      |      |      |     |      |      |      |
| isoform=cb2686_c4;full_length_coverage=1;non_full_length_coverage=0;isoform_length=2023;expected_accuracy=0.997      | isoform=cb2686_c5;full_length_coverage=1;non_full_length_coverage=0;isoform_length=3171;expected_accuracy=0.994     | 11                      | 1187 | 1187 | 2023 | 512 | 1687 | 2208 | 3044 |
| cb5132_c1/f2p1/1791                                                                                                  | gnl BL_ORD_ID 43253                                                                                                 | cb5132_c3/f1p0/3552     |      |      |      |     |      |      |      |
| isoform=cb5132_c1;full_length_coverage=2;non_full_length_coverage=1;isoform_length=1791;expected_accuracy=1.000      | isoform=cb5132_c3;full_length_coverage=1;non_full_length_coverage=0;isoform_length=3552;expected_accuracy=0.999     | 1                       | 1068 | 1067 | 1791 | 22  | 1069 | 2834 | 3545 |
| cb4123_c103/f1p0/1158                                                                                                | gnl BL_ORD_ID 41229                                                                                                 | cb4123_c16/f2p0/1482    |      |      |      |     |      |      |      |
|                                                                                                                      | isoform=cb4123_c16;full_length_coverage=2;non_full_length_coverage=0;isoform_length=1482;expected_accuracy=0.999    | 292                     | 1178 | 9    | 295  | 576 | 1463 | 1    | 286  |

|                                                                                                                                                |                                                                                                                                                                    |      |      |      |      |      |          |      |          |  |
|------------------------------------------------------------------------------------------------------------------------------------------------|--------------------------------------------------------------------------------------------------------------------------------------------------------------------|------|------|------|------|------|----------|------|----------|--|
|                                                                                                                                                | acy=1.000                                                                                                                                                          |      |      |      |      |      |          |      |          |  |
| cb8564_c36731/f1p2/2761                                                                                                                        | gnl BL_ORD_ID 55600 cb8564_c46484/f1p0/3151                                                                                                                        | 102  | 1977 | 1972 | 2741 | 5    | 190<br>2 | 2331 | 310<br>0 |  |
| cb3842_c0/f2p0/2475<br>isoform=cb3842_c0;full_length_coverage=2;non_full_length_coverage=0;isoform_length=2475;expected_accuracy=0.997         | gnl BL_ORD_ID 40308 cb3842_c6/f1p0/3329<br>isoform=cb3842_c6;full_length_coverage=1;non_full_length_coverage=0;isoform_length=3329;expected_accuracy=0.991         | 1    | 2194 | 2195 | 2455 | 7    | 219<br>9 | 3071 | 332<br>9 |  |
| cb8564_c46177/f1p0/1967                                                                                                                        | gnl BL_ORD_ID 10223 cb8564_c10832/f3p0/2415<br>isoform=cb8564_c10832;full_length_coverage=3;non_full_length_coverage=0;isoform_length=2415;expected_accuracy=0.998 | 177  | 1963 | 16   | 180  | 576  | 236<br>3 | 16   | 177      |  |
| cb14139_c0/f5p0/1783<br>isoform=cb14139_c0;full_length_coverage=5;non_full_length_coverage=0;isoform_length=1783;expected_accuracy=1.000       | gnl BL_ORD_ID 21468 cb9813_c26/f1p0/2710<br>isoform=cb9813_c26;full_length_coverage=1;non_full_length_coverage=0;isoform_length=2710;expected_accuracy=0.990       | 1    | 1005 | 1005 | 1756 | 22   | 102<br>4 | 1962 | 271<br>0 |  |
| cb8564_c35645/f1p0/2804                                                                                                                        | gnl BL_ORD_ID 18906 cb8564_c90449/f1p3/3223<br>isoform=cb8564_c90449;full_length_coverage=1;non_full_length_coverage=3;isoform_length=3223;expected_accuracy=0.996 | 149  | 2726 | 1    | 151  | 639  | 321<br>6 | 33   | 182      |  |
| cb8564_c13282/f1p2/2892<br>isoform=cb8564_c13282;full_length_coverage=1;non_full_length_coverage=2;isoform_length=2892;expected_accuracy=0.994 | gnl BL_ORD_ID 35903 cb18782_c2/f1p2/5753<br>isoform=cb18782_c2;full_length_coverage=1;non_full_length_coverage=2;isoform_length=5753;expected_accuracy=0.991       | 1    | 1772 | 1767 | 2892 | 29   | 179<br>1 | 4612 | 573<br>1 |  |
| cb1049_c9/f1p0/2974<br>isoform=cb1049_c9;full_length_coverage=1;non_full_length_coverage=0;isoform_length=2974;expected_accuracy=0.994         | gnl BL_ORD_ID 1657 cb1049_c5/f2p1/3134<br>isoform=cb1049_c5;full_length_coverage=2;non_full_length_coverage=1;isoform_length=3134;expected_accuracy=0.994          | 1345 | 2974 | 1    | 1346 | 1452 | 308<br>1 | 4    | 134<br>9 |  |

|                                                                                                                                                     |                                                                                                                                                                                             |      |      |      |      |      |      |      |      |
|-----------------------------------------------------------------------------------------------------------------------------------------------------|---------------------------------------------------------------------------------------------------------------------------------------------------------------------------------------------|------|------|------|------|------|------|------|------|
| acy=1.000<br>cb1401_c3/f1p0/3485<br>isoform=cb1401_c3;full_length_coverage=1;non_full_length_coverage=0;isoform_length=3485;expected_accuracy=0.994 | cy=1.000<br>gnl BL_ORD_ID 25500                      cb1401_c2/f1p0/3828<br>isoform=cb1401_c2;full_length_coverage=1;non_full_length_coverage=0;isoform_length=3828;expected_accuracy=0.992 | 1149 | 3485 | 1    | 1151 | 1486 | 3828 | 168  | 1324 |
| cb647_c8/f1p0/1962<br>isoform=cb647_c8;full_length_coverage=1;non_full_length_coverage=0;isoform_length=1962;expected_accuracy=1.000                | gnl BL_ORD_ID 5577                      cb647_c7/f1p0/2791<br>isoform=cb647_c7;full_length_coverage=1;non_full_length_coverage=0;isoform_length=2791;expected_accuracy=0.993                | 1    | 1235 | 1233 | 1956 | 151  | 1383 | 2058 | 2790 |
| cb10594_c0/f6p0/1247<br>isoform=cb10594_c0;full_length_coverage=6;non_full_length_coverage=0;isoform_length=1247;expected_accuracy=1.000            | gnl BL_ORD_ID 1370                      cb10594_c1/f1p0/1672<br>isoform=cb10594_c1;full_length_coverage=1;non_full_length_coverage=0;isoform_length=1672;expected_accuracy=0.995            | 340  | 1247 | 7    | 342  | 769  | 1672 | 1    | 335  |
| cb5183_c100/f1p2/1592<br>isoform=cb5183_c100;full_length_coverage=1;non_full_length_coverage=2;isoform_length=1592;expected_accuracy=0.998          | gnl BL_ORD_ID 73602   cb5183_c57/f1p0/1810                                                                                                                                                  | 278  | 1562 | 3    | 282  | 413  | 1694 | 9    | 288  |
| cb295_c59/f1p4/2024<br>isoform=cb295_c59;full_length_coverage=1;non_full_length_coverage=4;isoform_length=2024;expected_accuracy=0.993              | gnl BL_ORD_ID 37900                      cb295_c23/f1p1/2681<br>isoform=cb295_c23;full_length_coverage=1;non_full_length_coverage=1;isoform_length=2681;expected_accuracy=0.993             | 1    | 1368 | 1367 | 2024 | 1    | 1349 | 1987 | 2641 |
| cb8564_c2505/f1p0/2018                                                                                                                              | gnl BL_ORD_ID 55631   cb8564_c2499/f1p0/2257                                                                                                                                                | 12   | 1423 | 1423 | 1935 | 118  | 1524 | 1667 | 2180 |
| cb8564_c51035/f2p2/4216<br>isoform=cb8564_c51035;full_length_coverage=2;non_full_length_coverage=2;isoform_length=4216;expected_                    | gnl BL_ORD_ID 14819                      cb8564_c40333/f1p2/4446<br>isoform=cb8564_c40333;full_length_coverage=1;non_full_length_coverage=2;isoform_length=4446;expected_                   | 14   | 3261 | 3257 | 4156 | 1    | 3280 | 3545 | 4446 |



|                                                                                                                     |                                                                                                                      |     |      |      |      |     |      |      |     |   |
|---------------------------------------------------------------------------------------------------------------------|----------------------------------------------------------------------------------------------------------------------|-----|------|------|------|-----|------|------|-----|---|
| accuracy=0.999                                                                                                      | accuracy=0.998                                                                                                       |     |      |      |      |     |      |      |     |   |
| cb8564_c36954/f1p1/3314                                                                                             | gnl BL_ORD_ID 57963 cb8564_c85293/f1p2/3232                                                                          | 2   | 2145 | 2144 | 3191 | 168 | 231  | 2200 | 324 |   |
|                                                                                                                     |                                                                                                                      |     |      |      |      |     | 3    |      | 7   |   |
| cb8564_c45150/f1p0/2940                                                                                             | gnl BL_ORD_ID 17429 cb8564_c85447/f1p0/3196                                                                          |     |      |      |      |     |      |      |     |   |
| isoform=cb8564_c45150;full_length_coverage=1;non_full_length_coverage=0;isoform_length=2940;expected_accuracy=0.992 | isoform=cb8564_c85447;full_length_coverage=1;non_full_length_coverage=0;isoform_length=3196;expected_accuracy=0.997  | 1   | 2403 | 2402 | 2935 | 3   | 241  | 2660 | 319 | 6 |
|                                                                                                                     |                                                                                                                      |     |      |      |      |     | 3    |      |     |   |
| cb862_c7/f1p0/2681                                                                                                  | gnl BL_ORD_ID 56507 cb862_c26/f1p0/2964                                                                              | 1   | 1294 | 1291 | 2671 | 98  | 139  | 1523 | 293 | 1 |
|                                                                                                                     |                                                                                                                      |     |      |      |      |     | 9    |      |     |   |
| cb8564_c2535/f1p0/2190                                                                                              | gnl BL_ORD_ID 15337 cb8564_c2536/f1p0/2410                                                                           |     |      |      |      |     |      |      |     |   |
| isoform=cb8564_c2535;full_length_coverage=1;non_full_length_coverage=0;isoform_length=2190;expected_accuracy=1.000  | isoform=cb8564_c2536;full_length_coverage=1;non_full_length_coverage=0;isoform_length=2410;expected_accuracy=1.000   | 1   | 1520 | 1521 | 2154 | 66  | 161  | 1777 | 241 | 0 |
|                                                                                                                     |                                                                                                                      |     |      |      |      |     | 0    |      |     |   |
| cb12446_c3/f1p0/1412                                                                                                | gnl BL_ORD_ID 9272 cb8564_c101010/f5p2/2025                                                                          |     |      |      |      |     |      |      |     |   |
| isoform=cb12446_c3;full_length_coverage=1;non_full_length_coverage=0;isoform_length=1412;expected_accuracy=1.000    | isoform=cb8564_c101010;full_length_coverage=5;non_full_length_coverage=2;isoform_length=2025;expected_accuracy=0.990 | 109 | 1412 | 1    | 111  | 669 | 197  | 83   | 184 |   |
|                                                                                                                     |                                                                                                                      |     |      |      |      |     | 1    |      |     |   |
| cb5622_c7/f1p0/1600                                                                                                 | gnl BL_ORD_ID 74169 cb5622_c2/f1p0/2496                                                                              |     |      |      |      |     |      |      |     |   |
| isoform=cb5622_c7;full_length_coverage=1;non_full_length_coverage=0;isoform_length=1600;expected_accuracy=0.996     |                                                                                                                      | 12  | 1227 | 1227 | 1600 | 1   | 121  | 2011 | 238 | 4 |
|                                                                                                                     |                                                                                                                      |     |      |      |      |     | 7    |      |     |   |
| cb7111_c5/f1p0/1972                                                                                                 | gnl BL_ORD_ID 47848 cb7111_c2/f1p0/2690                                                                              |     |      |      |      |     |      |      |     |   |
|                                                                                                                     |                                                                                                                      | 1   | 1116 | 1113 | 1778 | 27  | 1142 | 2027 | 269 | 2 |
|                                                                                                                     |                                                                                                                      |     |      |      |      |     |      |      |     |   |
| cb8564_c117792/f1p0/2284                                                                                            | gnl BL_ORD_ID 13020 cb8564_c16150/f1p0/2824                                                                          |     |      |      |      |     |      |      |     |   |
| isoform=cb8564_c117792;full_length_coverage=1;non_full_length_coverage=0;isoform_length=2284;expected               | isoform=cb8564_c16150;full_length_coverage=1;non_full_length_coverage=0;isoform_length=2824;expected                 | 1   | 1262 | 1257 | 2284 | 1   | 126  | 1798 | 282 | 4 |
|                                                                                                                     |                                                                                                                      |     |      |      |      |     | 3    |      |     |   |

|                                                                                                                                                           |                                                                                                                                                                                                                                                |      |      |      |      |      |      |      |      |
|-----------------------------------------------------------------------------------------------------------------------------------------------------------|------------------------------------------------------------------------------------------------------------------------------------------------------------------------------------------------------------------------------------------------|------|------|------|------|------|------|------|------|
| _accuracy=0.995<br>cb3769_c1/f2p0/2942<br>isoform=cb3769_c1;full_length_coverage=2;non_full_length_coverage=0;isoform_length=2942;expected_accuracy=0.996 | curacy=0.997<br>gnl BL_ORD_ID 40981                      cb3769_c3/f1p0/3241<br>isoform=cb3769_c3;full_length_coverage=1;non_full_length_coverage=0;isoform_length=3241;expected_accuracy=0.995                                                | 1    | 2358 | 2357 | 2942 | 46   | 2407 | 2657 | 3240 |
| cb18646_c1/f2p2/6581<br>isoform=cb18646_c1;full_length_coverage=2;non_full_length_coverage=2;isoform_length=6581;expected_accuracy=0.999                  | gnl BL_ORD_ID 34400                      cb18646_c6/f1p3/6738<br>isoform=cb18646_c6;full_length_coverage=1;non_full_length_coverage=3;isoform_length=6738;expected_accuracy=0.995                                                              | 1    | 6228 | 6228 | 6581 | 23   | 6245 | 6371 | 6720 |
| cb13752_c8/f1p0/1329<br>isoform=cb13752_c8;full_length_coverage=1;non_full_length_coverage=0;isoform_length=1329;expected_accuracy=0.993                  | gnl BL_ORD_ID 25257                      cb13752_c3/f2p0/1870<br>isoform=cb13752_c3;full_length_coverage=2;non_full_length_coverage=0;isoform_length=1870;expected_accuracy=0.995                                                              | 433  | 1303 | 7    | 434  | 1000 | 1870 | 7    | 435  |
| cb8564_c78741/f1p0/2473<br>isoform=cb8564_c78741;full_length_coverage=1;non_full_length_coverage=0;isoform_length=2473;expected_accuracy=1.000            | gnl BL_ORD_ID 19257                      cb8564_c83505/f1p0/3415<br>isoform=cb8564_c83505;full_length_coverage=1;non_full_length_coverage=0;isoform_length=3415;expected_accuracy=1.000                                                        | 1    | 1617 | 1617 | 2452 | 415  | 2031 | 2579 | 3415 |
| cb8564_c36056/f1p0/2652<br>isoform=cb8564_c36056;full_length_coverage=1;non_full_length_coverage=0;isoform_length=2652;expected_accuracy=0.999            | gnl BL_ORD_ID 57134   cb8564_c84358/f1p0/3146<br><br>gnl BL_ORD_ID 11343                      cb8564_c148508/f1p3/2825<br>isoform=cb8564_c148508;full_length_coverage=1;non_full_length_coverage=3;isoform_length=2825;expected_accuracy=0.994 | 248  | 2651 | 1    | 251  | 532  | 2930 | 72   | 324  |
| cb8564_c71815/f1p0/2753<br>isoform=cb8564_c71815;full_length_coverage=1;non_full_length_coverage=0;isoform_length=2753;expected_accuracy=0.994            | gnl BL_ORD_ID 54984   cb8564_c4106/f1p2/2854                                                                                                                                                                                                   | 1014 | 2256 | 1    | 1018 | 1300 | 254  | 204  | 1189 |

|                                                                                                                                                 |                     |                          |      |      |      |      |      |      |      |      |  |  |
|-------------------------------------------------------------------------------------------------------------------------------------------------|---------------------|--------------------------|------|------|------|------|------|------|------|------|--|--|
| isoform=cb8564_c73423;full_length_coverage=1;non_full_length_coverage=2;isoform_length=2256;expected_accuracy=0.994<br>cb8564_c110147/f1p0/3399 |                     |                          |      |      |      |      |      |      |      | 1    |  |  |
| isoform=cb8564_c110147;full_length_coverage=1;non_full_length_coverage=0;isoform_length=3399;expected_accuracy=0.999<br>cb8564_c69690/f2p0/1977 | gnl BL_ORD_ID 52309 | cb8564_c117845/f1p1/3666 | 1    | 2986 | 2987 | 3399 | 9    | 2994 | 3251 | 3664 |  |  |
| isoform=cb8564_c69690;full_length_coverage=2;non_full_length_coverage=0;isoform_length=1977;expected_accuracy=1.000<br>cb8564_c47737/f7p5/4351  | gnl BL_ORD_ID 18072 | cb8564_c85619/f1p0/2084  | 1    | 1679 | 1678 | 1948 | 2    | 1680 | 1814 | 2084 |  |  |
| isoform=cb8564_c47737;full_length_coverage=7;non_full_length_coverage=5;isoform_length=4351;expected_accuracy=0.998<br>cb8564_c12758/f1p0/2368  | gnl BL_ORD_ID 14942 | cb8564_c34188/f2p3/4546  | 1    | 3380 | 3376 | 4274 | 5    | 3382 | 3647 | 4546 |  |  |
| isoform=cb8564_c12758;full_length_coverage=1;non_full_length_coverage=0;isoform_length=2368;expected_accuracy=0.995<br>cb8564_c5118/f1p1/4889   | gnl BL_ORD_ID 11785 | cb8564_c12484/f1p0/2841  | 1    | 1331 | 1331 | 2324 | 57   | 1386 | 1850 | 2841 |  |  |
| isoform=cb8564_c5118;full_length_coverage=1;non_full_length_coverage=1;isoform_length=4889;expected_accuracy=0.991<br>cb1514_c4/f2p1/3503       | gnl BL_ORD_ID 30141 | cb14859_c7/f1p3/5317     | 1398 | 4787 | 1    | 1401 | 1913 | 5317 | 78   | 1486 |  |  |
| isoform=cb1514_c4;full_length_coverage=2;non_full_length_coverage=1;isoform_length=3503;expected_accuracy=0.994                                 | gnl BL_ORD_ID 30815 | cb1514_c26/f47p2/3605    | 1    | 3277 | 3277 | 3500 | 1    | 3280 | 3382 | 3605 |  |  |

|                                                                                                                      |                                                                                                                     |      |      |      |      |      |          |      |          |  |
|----------------------------------------------------------------------------------------------------------------------|---------------------------------------------------------------------------------------------------------------------|------|------|------|------|------|----------|------|----------|--|
| acy=0.997                                                                                                            | uracy=1.000                                                                                                         |      |      |      |      |      |          |      |          |  |
| cb1333_c101/f1p0/1395                                                                                                |                                                                                                                     |      |      |      |      |      |          |      |          |  |
| isoform=cb1333_c101;full_length_coverage=1;non_full_length_coverage=0;isoform_length=1395;expected_accuracy=0.997    | gnl BL_ORD_ID 61262 cb1333_c125/f1p1/5010                                                                           | 149  | 1395 | 27   | 150  | 3610 | 485<br>4 | 29   | 152      |  |
| cb4579_c3/f1p0/2979                                                                                                  | gnl BL_ORD_ID 43920 cb4579_c6/f1p0/3307                                                                             |      |      |      |      |      |          |      |          |  |
| isoform=cb4579_c6;full_length_coverage=1;non_full_length_coverage=0;isoform_length=3307;expected_accuracy=0.999      | isoform=cb4579_c6;full_length_coverage=1;non_full_length_coverage=0;isoform_length=3307;expected_accuracy=0.999     | 1243 | 2911 | 1    | 1246 | 1639 | 330<br>7 | 33   | 127<br>8 |  |
| cb8564_c132934/f1p2/2237                                                                                             | gnl BL_ORD_ID 13514 cb8564_c21005/f1p1/4445                                                                         |      |      |      |      |      |          |      |          |  |
| isoform=cb8564_c132934;full_length_coverage=1;non_full_length_coverage=2;isoform_length=2237;expected_accuracy=0.999 | isoform=cb8564_c21005;full_length_coverage=1;non_full_length_coverage=1;isoform_length=4445;expected_accuracy=0.999 | 1    | 1837 | 1834 | 2182 | 1    | 183<br>7 | 3560 | 390<br>7 |  |
| cb8564_c36056/f1p0/2652                                                                                              | gnl BL_ORD_ID 55391 cb8564_c40278/f3p2/3083                                                                         |      |      |      |      |      |          |      |          |  |
| isoform=cb8564_c36056;full_length_coverage=1;non_full_length_coverage=0;isoform_length=2652;expected_accuracy=0.999  | isoform=cb8564_c40278;full_length_coverage=1;non_full_length_coverage=0;isoform_length=3083;expected_accuracy=0.999 | 248  | 2652 | 1    | 251  | 466  | 287<br>1 | 70   | 322      |  |
| cb6530_c80/f1p0/2511                                                                                                 | gnl BL_ORD_ID 4005 cb6530_c35/f1p0/2668                                                                             |      |      |      |      |      |          |      |          |  |
| isoform=cb6530_c80;full_length_coverage=1;non_full_length_coverage=0;isoform_length=2511;expected_accuracy=0.992     | isoform=cb6530_c35;full_length_coverage=1;non_full_length_coverage=0;isoform_length=2668;expected_accuracy=0.998    | 1    | 2002 | 1997 | 2511 | 30   | 201<br>4 | 2116 | 262<br>6 |  |
| cb8564_c15376/f1p0/4060                                                                                              | gnl BL_ORD_ID 13816 cb8564_c22331/f1p0/4122                                                                         |      |      |      |      |      |          |      |          |  |
| isoform=cb8564_c15376;full_length_coverage=1;non_full_length_coverage=0;isoform_length=4060;expected_accuracy=0.992  | isoform=cb8564_c22331;full_length_coverage=1;non_full_length_coverage=0;isoform_length=4122;expected_accuracy=0.992 | 147  | 2717 | 2717 | 3675 | 494  | 306<br>2 | 3166 | 412<br>2 |  |
| cb8564_c41115/f1p3/2751                                                                                              | gnl BL_ORD_ID 15154 cb8564_c32509/f1p1/2880                                                                         |      |      |      |      |      |          |      |          |  |
| isoform=cb8564_c41115;full_length_coverage=1;non_full_length_coverage=0;isoform_length=2751;expected_accuracy=0.992  | isoform=cb8564_c32509;full_length_coverage=1;non_full_length_coverage=0;isoform_length=2880;expected_accuracy=0.992 | 14   | 1542 | 1539 | 2673 | 2    | 155      | 1729 | 287      |  |

|                                                                                                                  |                                                                                                                     |      |      |      |      |      |      |      |      |
|------------------------------------------------------------------------------------------------------------------|---------------------------------------------------------------------------------------------------------------------|------|------|------|------|------|------|------|------|
|                                                                                                                  | isoform=cb8564_c32509;full_length_coverage=1;non_full_length_coverage=1;isoform_length=2880;expected_accuracy=0.991 |      |      |      |      |      |      | 4    | 7    |
| cb7230_c11/f1p0/1539                                                                                             | gnl BL_ORD_ID 8684                      cb7230_c8/f1p0/1707                                                         |      |      |      |      |      |      |      |      |
| isoform=cb7230_c11;full_length_coverage=1;non_full_length_coverage=0;isoform_length=1539;expected_accuracy=0.993 | isoform=cb7230_c8;full_length_coverage=1;non_full_length_coverage=0;isoform_length=1707;expected_accuracy=1.000     | 1    | 1134 | 1135 | 1539 | 31   | 1169 | 1299 | 1705 |
| cb8564_c5122/f1p0/3329                                                                                           | gnl BL_ORD_ID 16486                      cb8564_c504/f6p2/3836                                                      |      |      |      |      |      |      |      |      |
|                                                                                                                  | isoform=cb8564_c504;full_length_coverage=6;non_full_length_coverage=2;isoform_length=3836;expected_accuracy=1.000   | 1067 | 3334 | 1    | 1069 | 1451 | 3720 | 89   | 1159 |
| cb1030_c34/f1p0/2904                                                                                             | gnl BL_ORD_ID 1420                      cb1030_c30/f1p0/3343                                                        |      |      |      |      |      |      |      |      |
|                                                                                                                  | isoform=cb1030_c30;full_length_coverage=1;non_full_length_coverage=0;isoform_length=3343;expected_accuracy=0.994    | 1    | 2740 | 2743 | 2873 | 34   | 2774 | 2898 | 3027 |
| cb8564_c45699/f1p0/3005                                                                                          | gnl BL_ORD_ID 16172                      cb8564_c53024/f1p0/3159                                                    |      |      |      |      |      |      |      |      |
|                                                                                                                  | isoform=cb8564_c53024;full_length_coverage=1;non_full_length_coverage=0;isoform_length=3159;expected_accuracy=0.996 | 1    | 1711 | 1708 | 2848 | 1    | 1699 | 2017 | 3157 |
| cb8428_c5/f1p0/2320                                                                                              | gnl BL_ORD_ID 10021                      cb8428_c4/f1p0/2354                                                        |      |      |      |      |      |      |      |      |
|                                                                                                                  | isoform=cb8428_c4;full_length_coverage=1;non_full_length_coverage=0;isoform_length=2354;expected_accuracy=0.993     | 1    | 1782 | 1777 | 2246 | 3    | 1788 | 1888 | 2354 |
| cb8205_c18/f1p0/1626                                                                                             | gnl BL_ORD_ID 8245                      cb8205_c5/f2p0/2450                                                         |      |      |      |      |      |      |      |      |
| isoform=cb8205_c18;full_length_coverage=1;non_full_length_coverage=0;isoform_length=1626;expected_accuracy=0.993 | isoform=cb8205_c5;full_length_coverage=2;non_full_length_coverage=0;isoform_length=2450;expected_accuracy=1.000     | 185  | 1605 | 43   | 190  | 1031 | 2448 | 241  | 388  |

|                                                                                                                  |                                                                                                                                                                    |     |      |      |      |      |      |      |      |  |
|------------------------------------------------------------------------------------------------------------------|--------------------------------------------------------------------------------------------------------------------------------------------------------------------|-----|------|------|------|------|------|------|------|--|
| racy=1.000                                                                                                       | cy=0.999                                                                                                                                                           |     |      |      |      |      |      |      |      |  |
| cb8564_c47011/f1p0/3100                                                                                          | gnl BL_ORD_ID 53680 cb8564_c153222/f2p39/3454                                                                                                                      | 2   | 2306 | 2301 | 2929 | 6    | 2304 | 2542 | 3170 |  |
| cb9718_c43/f1p0/1655                                                                                             |                                                                                                                                                                    |     |      |      |      |      |      |      |      |  |
| isoform=cb9718_c43;full_length_coverage=1;non_full_length_coverage=0;isoform_length=1655;expected_accuracy=0.996 | gnl BL_ORD_ID 59926 cb9718_c14/f1p3/1868                                                                                                                           | 288 | 1655 | 4    | 290  | 392  | 1759 | 6    | 292  |  |
| cb8564_c71815/f1p0/2753                                                                                          | gnl BL_ORD_ID 19155 cb8564_c90208/f1p2/2920<br>isoform=cb8564_c90208;full_length_coverage=1;non_full_length_coverage=2;isoform_length=2920;expected_accuracy=0.990 | 11  | 1377 | 1372 | 2485 | 24   | 1422 | 1660 | 2784 |  |
| cb7637_c9/f1p1/2355                                                                                              | gnl BL_ORD_ID 51422 cb7637_c20/f1p0/2581                                                                                                                           | 1   | 1619 | 1618 | 2350 | 51   | 1669 | 1789 | 2522 |  |
| cb1585_c28/f1p0/1745                                                                                             | gnl BL_ORD_ID 30289 cb1585_c7/f1p0/4254<br>isoform=cb1585_c7;full_length_coverage=1;non_full_length_coverage=0;isoform_length=4254;expected_accuracy=0.995         | 672 | 1742 | 81   | 675  | 3178 | 4254 | 1881 | 2475 |  |
| cb1312_c24/f1p0/3018                                                                                             | gnl BL_ORD_ID 27494 cb1312_c37/f6p0/3835<br>isoform=cb1312_c37;full_length_coverage=6;non_full_length_coverage=0;isoform_length=3835;expected_accuracy=0.999       | 1   | 1532 | 1531 | 2888 | 90   | 1619 | 2351 | 3708 |  |
| cb7036_c15/f1p0/1899                                                                                             | gnl BL_ORD_ID 5116 cb7036_c19/f1p1/2831<br>isoform=cb7036_c19;full_length_coverage=1;non_full_length_coverage=1;isoform_length=2831;expected_accuracy=0.996        | 1   | 1462 | 1458 | 1900 | 1    | 1462 | 2317 | 2759 |  |
| cb8564_c152519/f2p1/2103                                                                                         | gnl BL_ORD_ID 13269 cb8564_c19149/f1p1/2483                                                                                                                        | 114 | 2102 | 1    | 116  | 458  | 244  | 52   | 168  |  |

|                                                                                                                      |                                                                                                                     |     |      |      |      |      |     |      |     |   |
|----------------------------------------------------------------------------------------------------------------------|---------------------------------------------------------------------------------------------------------------------|-----|------|------|------|------|-----|------|-----|---|
| isoform=cb8564_c152519;full_length_coverage=2;non_full_length_coverage=1;isoform_length=2103;expected_accuracy=1.000 | isoform=cb8564_c19149;full_length_coverage=1;non_full_length_coverage=1;isoform_length=2483;expected_accuracy=0.998 |     |      |      |      |      |     | 3    |     |   |
| cb8564_c86279/f2p1/3248                                                                                              | gnl BL_ORD_ID 57409 cb8564_c92262/f1p0/3503                                                                         | 366 | 3248 | 82   | 368  | 456  | 334 | 1    | 287 |   |
| cb12047_c103/f1p1/1531                                                                                               | gnl BL_ORD_ID 55337 cb8564_c38755/f1p3/1935                                                                         | 9   | 870  | 865  | 1531 | 1    | 862 | 1148 | 181 | 4 |
| cb2101_c6/f1p0/2473                                                                                                  | gnl BL_ORD_ID 34649 cb2101_c0/f3p0/2796                                                                             |     |      |      |      |      |     |      |     |   |
| isoform=cb2101_c6;full_length_coverage=1;non_full_length_coverage=0;isoform_length=2473;expected_accuracy=0.990      | isoform=cb2101_c0;full_length_coverage=3;non_full_length_coverage=0;isoform_length=2796;expected_accuracy=0.997     | 1   | 1937 | 1934 | 2473 | 1    | 191 | 2195 | 272 | 9 |
| cb8564_c37361/f1p0/3076                                                                                              | gnl BL_ORD_ID 55502 cb8564_c43538/f1p0/3563                                                                         | 1   | 2481 | 2477 | 3070 | 2    | 248 | 2588 | 318 | 0 |
| cb8564_c49593/f1p0/2995                                                                                              | gnl BL_ORD_ID 15063 cb8564_c37149/f1p9/3212                                                                         |     |      |      |      |      |     |      |     |   |
| isoform=cb8564_c49593;full_length_coverage=1;non_full_length_coverage=0;isoform_length=2995;expected_accuracy=0.992  | isoform=cb8564_c37149;full_length_coverage=1;non_full_length_coverage=9;isoform_length=3212;expected_accuracy=0.991 | 717 | 2972 | 74   | 721  | 950  | 321 | 114  | 770 | 2 |
| cb322_c35/f1p0/3437                                                                                                  | gnl BL_ORD_ID 40505 cb322_c54/f1p0/3800                                                                             |     |      |      |      |      |     |      |     |   |
| isoform=cb322_c35;full_length_coverage=1;non_full_length_coverage=0;isoform_length=3437;expected_accuracy=0.997      | isoform=cb322_c54;full_length_coverage=1;non_full_length_coverage=0;isoform_length=3800;expected_accuracy=0.996     | 114 | 3437 | 1    | 119  | 376  | 368 | 8    | 125 | 9 |
| cb8564_c91845/f1p0/2021                                                                                              | gnl BL_ORD_ID 16543 cb8564_c75067/f1p1/2650                                                                         |     |      |      |      |      |     |      |     |   |
| isoform=cb8564_c91845;full_length_coverage=1;non_full_length_coverage=0;isoform_length=2021;expected_accuracy=0.998  | isoform=cb8564_c75067;full_length_coverage=1;non_full_length_coverage=1;isoform_length=2650;expected_accuracy=0.995 | 483 | 2021 | 91   | 481  | 1111 | 264 | 413  | 802 | 8 |
| cb6277_c19/f1p1/2357                                                                                                 | gnl BL_ORD_ID 5386 cb6277_c20/f1p1/2469                                                                             | 177 | 2335 | 1    | 178  | 311  | 246 | 1    | 178 |   |

|                                                                                                                                          |                                                                                                                                                                          |      |      |      |      |      |     |      |      |   |
|------------------------------------------------------------------------------------------------------------------------------------------|--------------------------------------------------------------------------------------------------------------------------------------------------------------------------|------|------|------|------|------|-----|------|------|---|
| isoform=cb6277_c19;full_length_coverage=1;non_full_length_coverage=1;isoform_length=2357;expected_accuracy=0.995<br>cb1178_c27/flp0/1197 | isoform=cb6277_c20;full_length_coverage=1;non_full_length_coverage=1;isoform_length=2469;expected_accuracy=0.998<br>gnl BL_ORD_ID 23776          cb1178_c19/flp0/1460    |      |      |      |      |      |     |      |      | 9 |
| isoform=cb1178_c27;full_length_coverage=1;non_full_length_coverage=0;isoform_length=1197;expected_accuracy=0.992                         | isoform=cb1178_c19;full_length_coverage=1;non_full_length_coverage=0;isoform_length=1460;expected_accuracy=1.000<br>gnl BL_ORD_ID 14052          cb8564_c38815/flp3/3473 | 111  | 1197 | 1    | 110  | 297  | 138 | 73   | 176  | 2 |
| cb8564_c19433/flp0/3193                                                                                                                  | isoform=cb8564_c38815;full_length_coverage=1;non_full_length_coverage=3;isoform_length=3473;expected_accuracy=0.995                                                      | 623  | 3126 | 8    | 624  | 814  | 331 | 1    | 617  | 5 |
| cb8276_c1/f2p1/2355                                                                                                                      | gnl BL_ORD_ID 8462          cb8276_c6/flp1/3242                                                                                                                          |      |      |      |      |      |     |      |      |   |
| isoform=cb8276_c1;full_length_coverage=2;non_full_length_coverage=1;isoform_length=2355;expected_accuracy=0.996                          | isoform=cb8276_c6;full_length_coverage=1;non_full_length_coverage=1;isoform_length=3242;expected_accuracy=1.000                                                          | 1    | 1379 | 1377 | 2323 | 2    | 138 | 2296 | 324  | 1 |
| cb5137_c75/flp0/3221                                                                                                                     | gnl BL_ORD_ID 42828          cb5137_c119/flp0/5065                                                                                                                       |      |      |      |      |      |     |      |      |   |
| cb8564_c113873/flp1/4424                                                                                                                 | isoform=cb5137_c119;full_length_coverage=1;non_full_length_coverage=0;isoform_length=5065;expected_accuracy=0.997                                                        | 317  | 2874 | 7    | 318  | 2507 | 506 | 65   | 354  | 5 |
| isoform=cb8564_c113873;full_length_coverage=1;non_full_length_coverage=1;isoform_length=4424;expected_accuracy=0.997                     | gnl BL_ORD_ID 52930          cb8564_c112168/flp0/4870                                                                                                                    | 205  | 4363 | 1    | 206  | 547  | 470 | 185  | 390  | 7 |
| cb8564_c83505/flp0/3415                                                                                                                  | gnl BL_ORD_ID 16981          cb8564_c75995/flp0/3575                                                                                                                     |      |      |      |      |      |     |      |      |   |
| isoform=cb8564_c83505;full_length_coverage=1;non_full_length_coverage=0;isoform_length=3415;expected_accuracy=0.997                      | isoform=cb8564_c75995;full_length_coverage=1;non_full_length_coverage=0;isoform_length=3575;expected_accuracy=0.997                                                      | 1489 | 3415 | 1    | 1492 | 1616 | 353 | 4    | 1511 | 6 |





|                                                                                                                                                        |                                                                                                                                                                                                 |     |      |      |      |     |      |      |      |
|--------------------------------------------------------------------------------------------------------------------------------------------------------|-------------------------------------------------------------------------------------------------------------------------------------------------------------------------------------------------|-----|------|------|------|-----|------|------|------|
| accuracy=0.994<br>cb150_c4/f1p0/3890<br>isoform=cb150_c4;full_length_coverage=1;non_full_length_coverage=0;isoform_length=3890;expected_accuracy=0.996 | accuracy=0.998<br>gnl BL_ORD_ID 29111                      cb150_c3/f1p0/4197<br>isoform=cb150_c3;full_length_coverage=1;non_full_length_coverage=0;isoform_length=4197;expected_accuracy=0.995 | 1   | 3310 | 3309 | 3884 | 4   | 3310 | 3620 | 4197 |
| cb1278_c11/f10p1/2558<br>isoform=cb1278_c11;full_length_coverage=10;non_full_length_coverage=1;isoform_length=2558;expected_accuracy=1.000             | gnl BL_ORD_ID 27259                      cb1278_c5/f1p0/4398<br>isoform=cb1278_c5;full_length_coverage=1;non_full_length_coverage=0;isoform_length=4398;expected_accuracy=0.998                 | 1   | 1951 | 1949 | 2536 | 7   | 1955 | 3811 | 4398 |
| cb1770_c25/f1p0/3573                                                                                                                                   | gnl BL_ORD_ID 33848                      cb1770_c5/f2p0/3464<br>isoform=cb1770_c5;full_length_coverage=2;non_full_length_coverage=0;isoform_length=3464;expected_accuracy=0.991                 | 138 | 3339 | 1    | 137  | 264 | 3464 | 19   | 160  |
| cb8564_c75384/f1p1/3644<br>isoform=cb8564_c75384;full_length_coverage=1;non_full_length_coverage=1;isoform_length=3644;expected_accuracy=0.994         | gnl BL_ORD_ID 57143      cb8564_c84495/f1p0/3631                                                                                                                                                | 10  | 2542 | 2542 | 3532 | 1   | 2535 | 2637 | 3625 |
| cb1016_c3/f1p0/2299<br>isoform=cb1016_c3;full_length_coverage=1;non_full_length_coverage=0;isoform_length=2299;expected_accuracy=0.996                 | gnl BL_ORD_ID 2484                      cb1016_c5/f1p0/2657<br>isoform=cb1016_c5;full_length_coverage=1;non_full_length_coverage=0;isoform_length=2657;expected_accuracy=0.996                  | 365 | 2299 | 4    | 367  | 740 | 2641 | 1    | 364  |
| cb8564_c84198/f1p0/2418                                                                                                                                | gnl BL_ORD_ID 57393      cb8564_c91758/f1p1/2726                                                                                                                                                | 1   | 2008 | 2006 | 2428 | 108 | 2118 | 2235 | 2657 |
| cb6471_c23/f1p0/2688                                                                                                                                   | gnl BL_ORD_ID 5660                      cb6471_c31/f2p2/2905<br>isoform=cb6471_c31;full_length_coverage=2;non_full_length_coverage=2;isoform_length=2905;expected_accuracy=0.996                | 1   | 1927 | 1928 | 2663 | 76  | 2000 | 2162 | 2897 |

|                                                                                                                     |                                                                                                                     |      |      |      |      |      |          |      |          |  |
|---------------------------------------------------------------------------------------------------------------------|---------------------------------------------------------------------------------------------------------------------|------|------|------|------|------|----------|------|----------|--|
| cb2108_c13/f1p0/3439                                                                                                | acy=1.000<br>gnl BL_ORD_ID 34468      cb2108_c4/f1p1/4035                                                           |      |      |      |      |      |          |      |          |  |
| isoform=cb2108_c13;full_length_coverage=1;non_full_length_coverage=0;isoform_length=3439;expected_accuracy=0.991    | isoform=cb2108_c4;full_length_coverage=1;non_full_length_coverage=1;isoform_length=4035;expected_accuracy=0.997     | 1    | 2929 | 2929 | 3322 | 603  | 350<br>1 | 3652 | 403<br>5 |  |
| cb8564_c36808/f1p0/2756                                                                                             | gnl BL_ORD_ID 56381      cb8564_c75626/f1p2/3199                                                                    | 19   | 2129 | 2127 | 2555 | 7    | 2116     | 2611 | 304<br>2 |  |
| cb2275_c0/f1p0/3981                                                                                                 | gnl BL_ORD_ID 14192      cb8564_c31974/f8p6/4543                                                                    |      |      |      |      |      |          |      |          |  |
| isoform=cb2275_c0;full_length_coverage=1;non_full_length_coverage=0;isoform_length=3981;expected_accuracy=0.998     | isoform=cb8564_c31974;full_length_coverage=8;non_full_length_coverage=6;isoform_length=4543;expected_accuracy=0.997 | 23   | 3840 | 3835 | 3981 | 4458 | 639      | 154  | 4        |  |
| cb13433_c53/f1p0/4827                                                                                               | gnl BL_ORD_ID 62376      cb13433_c57/f1p0/6389                                                                      | 2413 | 4789 | 1    | 2418 | 3382 | 575<br>8 | 68   | 250<br>4 |  |
| cb10133_c6/f1p1/1304                                                                                                | gnl BL_ORD_ID 3295      cb10133_c7/f1p1/1730                                                                        |      |      |      |      |      |          |      |          |  |
| isoform=cb10133_c7;full_length_coverage=1;non_full_length_coverage=1;isoform_length=1730;expected_accuracy=0.994    | isoform=cb10133_c7;full_length_coverage=1;non_full_length_coverage=1;isoform_length=1730;expected_accuracy=0.994    | 1    | 1074 | 1070 | 1307 | 203  | 127<br>6 | 1400 | 163<br>7 |  |
| cb8564_c66961/f1p1/3021                                                                                             | gnl BL_ORD_ID 55815      cb8564_c40609/f1p0/4032                                                                    | 15   | 2675 | 2672 | 3021 | 1    | 269<br>3 | 3388 | 373<br>1 |  |
| isoform=cb8564_c66961;full_length_coverage=1;non_full_length_coverage=1;isoform_length=3021;expected_accuracy=0.996 | gnl BL_ORD_ID 56602      cb8564_c48192/f1p6/3029                                                                    |      |      |      |      |      |          |      |          |  |
| cb8564_c41756/f1p0/2738                                                                                             | gnl BL_ORD_ID 56602      cb8564_c48192/f1p6/3029                                                                    | 1    | 2173 | 2170 | 2738 | 1    | 218<br>1 | 2304 | 287<br>1 |  |
| isoform=cb8564_c41756;full_length_coverage=1;non_full_length_coverage=0;isoform_length=2738;expected_accuracy=0.996 | gnl BL_ORD_ID 70407      cb3491_c4/f1p0/2063                                                                        |      |      |      |      |      |          |      |          |  |
| cb3491_c0/f3p0/1339                                                                                                 | gnl BL_ORD_ID 70407      cb3491_c4/f1p0/2063                                                                        | 449  | 1320 | 7    | 450  | 1170 | 204      | 1    | 454      |  |

|                                                                                                                      |                                                                                                                     |                          |     |      |      |      |      |      |      |      |  |
|----------------------------------------------------------------------------------------------------------------------|---------------------------------------------------------------------------------------------------------------------|--------------------------|-----|------|------|------|------|------|------|------|--|
| isoform=cb3491_c0;full_length_coverage=3;non_full_length_coverage=0;isoform_length=1339;expected_accuracy=1.000      |                                                                                                                     |                          |     |      |      |      |      |      |      | 1    |  |
| cb8539_c3/f2p0/2041                                                                                                  | gnl BL_ORD_ID 10884                                                                                                 | cb8539_c1/f2p0/2336      |     |      |      |      |      |      |      |      |  |
| isoform=cb8539_c3;full_length_coverage=2;non_full_length_coverage=0;isoform_length=2041;expected_accuracy=1.000      | isoform=cb8539_c1;full_length_coverage=2;non_full_length_coverage=0;isoform_length=2336;expected_accuracy=0.997     |                          | 552 | 2041 | 59   | 553  | 625  | 2114 | 1    | 486  |  |
| cb8564_c178335/f1p2/3430                                                                                             | gnl BL_ORD_ID 52309                                                                                                 | cb8564_c117845/f1p1/3666 |     |      |      |      |      |      |      |      |  |
| isoform=cb8564_c178335;full_length_coverage=1;non_full_length_coverage=2;isoform_length=3430;expected_accuracy=0.998 |                                                                                                                     |                          | 1   | 3015 | 3016 | 3430 | 1    | 2994 | 3251 | 3665 |  |
| cb2759_c0/f5p0/3138                                                                                                  | gnl BL_ORD_ID 37960                                                                                                 | cb2759_c3/f1p0/3834      |     |      |      |      |      |      |      |      |  |
| isoform=cb2759_c0;full_length_coverage=5;non_full_length_coverage=0;isoform_length=3138;expected_accuracy=1.000      | isoform=cb2759_c3;full_length_coverage=1;non_full_length_coverage=0;isoform_length=3834;expected_accuracy=0.998     |                          | 265 | 3138 | 20   | 264  | 944  | 3817 | 1    | 244  |  |
| cb18456_c6530/f1p0/1200                                                                                              | gnl BL_ORD_ID 34669                                                                                                 | cb18456_c6410/f1p1/1766  |     |      |      |      |      |      |      |      |  |
|                                                                                                                      | isoform=cb18456_c6410;full_length_coverage=1;non_full_length_coverage=1;isoform_length=1766;expected_accuracy=1.000 |                          | 260 | 1166 | 45   | 259  | 747  | 1657 | 1    | 215  |  |
| cb8564_c41551/f1p0/3408                                                                                              | gnl BL_ORD_ID 55920                                                                                                 | cb8564_c48949/f1p0/4357  |     |      |      |      |      |      |      |      |  |
|                                                                                                                      |                                                                                                                     |                          | 20  | 2289 | 2290 | 2953 | 18   | 2293 | 2847 | 3509 |  |
| cb8564_c46939/f1p1/2926                                                                                              | gnl BL_ORD_ID 57017                                                                                                 | cb8564_c80370/f1p0/3493  |     |      |      |      |      |      |      |      |  |
|                                                                                                                      |                                                                                                                     |                          | 119 | 2134 | 2130 | 2870 | 3085 | 1061 | 956  | 215  |  |
| cb8564_c36559/f1p11/3192                                                                                             | gnl BL_ORD_ID 55939                                                                                                 | cb8564_c49630/f1p4/3487  |     |      |      |      |      |      |      |      |  |
| isoform=cb8564_c36559;full_length_coverage=1;non_full_length_coverage=11;isoform_length=3192;expected                |                                                                                                                     |                          | 2   | 2934 | 2934 | 3182 | 3    | 2913 | 3243 | 3493 |  |

|                                                                                                                     |                                                                                                                      |                          |      |      |      |      |      |      |      |     |
|---------------------------------------------------------------------------------------------------------------------|----------------------------------------------------------------------------------------------------------------------|--------------------------|------|------|------|------|------|------|------|-----|
| <hr/>                                                                                                               |                                                                                                                      |                          |      |      |      |      |      |      |      |     |
| _accuracy=0.997                                                                                                     |                                                                                                                      |                          |      |      |      |      |      |      |      |     |
| cb8564_c34922/f1p0/2696                                                                                             | gnl BL_ORD_ID 16879                                                                                                  | cb8564_c48606/f1p1/3308  |      |      |      |      |      |      |      |     |
| isoform=cb8564_c34922;full_length_coverage=1;non_full_length_coverage=0;isoform_length=2696;expected_accuracy=0.993 | isoform=cb8564_c48606;full_length_coverage=1;non_full_length_coverage=1;isoform_length=3308;expected_accuracy=0.998  | 1                        | 2119 | 2115 | 2696 | 1    | 215  | 2587 | 316  | 9   |
| cb8564_c43538/f1p0/3563                                                                                             | gnl BL_ORD_ID 55939                                                                                                  | cb8564_c49630/f1p4/3487  | 10   | 2921 | 2921 | 3170 | 6    | 291  | 3243 | 349 |
| cb4775_c0/f2p1/1973                                                                                                 | gnl BL_ORD_ID 72004                                                                                                  | cb4775_c5/f1p0/2223      | 1    | 1660 | 1658 | 1973 | 4    | 168  | 1850 | 216 |
| isoform=cb4775_c0;full_length_coverage=2;non_full_length_coverage=1;isoform_length=1973;expected_accuracy=1.000     |                                                                                                                      |                          |      |      |      |      |      | 6    |      | 6   |
| cb1512_c15/f1p1/3322                                                                                                | gnl BL_ORD_ID 27954                                                                                                  | cb1512_c3/f2p2/4035      | 1    | 1682 | 1681 | 3271 | 1    | 168  | 2445 | 403 |
|                                                                                                                     | isoform=cb1512_c3;full_length_coverage=2;non_full_length_coverage=2;isoform_length=4035;expected_accuracy=0.999      |                          |      |      |      |      |      | 2    |      | 5   |
| cb18456_c1776/f1p0/1211                                                                                             | gnl BL_ORD_ID 11861                                                                                                  | cb8564_c126350/f1p2/2554 | 280  | 1214 | 6    | 285  | 962  | 29   | 1346 | 107 |
|                                                                                                                     | isoform=cb8564_c126350;full_length_coverage=1;non_full_length_coverage=2;isoform_length=2554;expected_accuracy=0.996 |                          |      |      |      |      |      |      |      | 4   |
| cb3774_c49/f1p0/3335                                                                                                | gnl BL_ORD_ID 41550                                                                                                  | cb3774_c42/f1p0/3959     | 1    | 2620 | 2617 | 3145 | 1    | 261  | 3436 | 395 |
|                                                                                                                     | isoform=cb3774_c42;full_length_coverage=1;non_full_length_coverage=0;isoform_length=3959;expected_accuracy=0.993     |                          |      |      |      |      |      | 7    |      | 9   |
| cb8564_c43601/f1p0/2228                                                                                             | gnl BL_ORD_ID 14729                                                                                                  | cb8564_c41849/f1p1/4203  | 1    | 1814 | 1814 | 2083 | 1712 | 352  | 3889 | 415 |
|                                                                                                                     | isoform=cb8564_c41849;full_length_coverage=1;non_full_length_coverage=1;isoform_length=4203;expected_ac              |                          |      |      |      |      |      | 4    |      | 9   |
| <hr/>                                                                                                               |                                                                                                                      |                          |      |      |      |      |      |      |      |     |

|                                                                                                                                                |                                                                                                                                                            |     |      |      |      |      |          |      |          |  |
|------------------------------------------------------------------------------------------------------------------------------------------------|------------------------------------------------------------------------------------------------------------------------------------------------------------|-----|------|------|------|------|----------|------|----------|--|
|                                                                                                                                                | curacy=0.996                                                                                                                                               |     |      |      |      |      |          |      |          |  |
| cb3061_c14/f1p0/2385                                                                                                                           | gnl BL_ORD_ID 69090 cb3061_c19/f1p0/3233                                                                                                                   | 177 | 2389 | 1    | 177  | 893  | 310<br>5 | 27   | 203      |  |
| cb8564_c3087/f1p0/2090<br>isoform=cb8564_c3087;full_length_coverage=1;non_full_length_coverage=0;isoform_length=2090;expected_accuracy=1.000   | gnl BL_ORD_ID 52384 cb8564_c121118/f1p0/2660                                                                                                               | 10  | 1914 | 1909 | 2090 | 7    | 191<br>0 | 2016 | 219<br>7 |  |
| cb18456_c4058/f1p1/1182<br>isoform=cb18456_c4058;full_length_coverage=1;non_full_length_coverage=1;isoform_length=1182;expected_accuracy=0.997 | gnl BL_ORD_ID 67493 cb18456_c4264/f1p1/1767                                                                                                                | 251 | 1182 | 5    | 256  | 803  | 172<br>8 | 4    | 247      |  |
| cb14165_c2/f1p0/1247                                                                                                                           | gnl BL_ORD_ID 39040 cb2856_c4/f1p0/2196<br>isoform=cb2856_c4;full_length_coverage=1;non_full_length_coverage=0;isoform_length=2196;expected_accuracy=0.996 | 309 | 1231 | 4    | 312  | 1254 | 219<br>6 | 28   | 333      |  |
| cb3270_c8/f1p0/2363<br>isoform=cb3270_c8;full_length_coverage=1;non_full_length_coverage=0;isoform_length=2363;expected_accuracy=0.994         | gnl BL_ORD_ID 70273 cb3270_c14/f1p0/2972                                                                                                                   | 1   | 1615 | 1620 | 2338 | 7    | 162<br>1 | 2252 | 297<br>0 |  |
| cb12043_c1/f2p0/1546<br>isoform=cb12043_c1;full_length_coverage=2;non_full_length_coverage=0;isoform_length=1546;expected_accuracy=0.998       | gnl BL_ORD_ID 54955 cb8564_c3933/f1p0/4298                                                                                                                 | 122 | 1508 | 1    | 122  | 2913 | 429<br>9 | 1    | 120      |  |
| cb5057_c18/f1p0/1420<br>isoform=cb5057_c18;full_length_coverage=1;non_full_length_coverage=0;isoform_length=1420;expected_accuracy=0.996       | gnl BL_ORD_ID 60447 cb11967_c17/f1p2/1809                                                                                                                  | 1   | 1020 | 1016 | 1420 | 3    | 102<br>2 | 1186 | 159<br>2 |  |

|                         |                                                                                                                                                                           |      |      |      |      |      |      |      |      |  |
|-------------------------|---------------------------------------------------------------------------------------------------------------------------------------------------------------------------|------|------|------|------|------|------|------|------|--|
| racy=0.992              |                                                                                                                                                                           |      |      |      |      |      |      |      |      |  |
| cb8564_c3432/f1p0/2118  | gnl BL_ORD_ID 13930      cb8564_c3400/f3p0/2378<br>isoform=cb8564_c3400;full_length_coverage=3;non_full_length_coverage=0;isoform_length=2378;expected_accuracy=0.992     | 619  | 2090 | 7    | 623  | 742  | 2214 | 10   | 626  |  |
| cb8564_c80524/f1p0/3995 | gnl BL_ORD_ID 67930      cb18656_c10/f1p0/5311<br>isoform=cb8564_c80524;full_length_coverage=1;non_full_length_coverage=0;isoform_length=3995;expected_accuracy=0.992     | 1    | 3658 | 3657 | 3991 | 438  | 4114 | 4844 | 5178 |  |
| cb4233_c140/f1p1/2272   | gnl BL_ORD_ID 71865      cb4233_c138/f1p0/3035<br>isoform=cb4233_c140;full_length_coverage=1;non_full_length_coverage=1;isoform_length=2272;expected_accuracy=0.996       | 1    | 1586 | 1581 | 2267 | 1    | 1586 | 2306 | 2995 |  |
| cb8564_c5122/f1p0/3329  | gnl BL_ORD_ID 55731      cb8564_c5169/f1p0/3921                                                                                                                           | 1067 | 3319 | 1    | 1069 | 1513 | 3764 | 87   | 1155 |  |
| cb1163_c42/f1p0/4122    | gnl BL_ORD_ID 23462      cb1163_c14/f1p1/4695<br>isoform=cb1163_c14;full_length_coverage=1;non_full_length_coverage=1;isoform_length=4695;expected_accuracy=0.991         | 120  | 1984 | 1983 | 3651 | 92   | 1955 | 3030 | 4692 |  |
| cb8564_c23232/f1p3/2540 | gnl BL_ORD_ID 12970      cb8564_c16702/f2p13/2748<br>isoform=cb8564_c16702;full_length_coverage=2;non_full_length_coverage=13;isoform_length=2748;expected_accuracy=0.998 | 16   | 2172 | 2167 | 2507 | 151  | 2306 | 2408 | 2748 |  |
| cb5483_c3/f1p0/2270     | gnl BL_ORD_ID 46850      cb5483_c4/f1p0/2765<br>isoform=cb5483_c3;full_length_coverage=1;non_full_length_coverage=0;isoform_length=2270;expected_accuracy=0.992           | 172  | 2270 | 1    | 176  | 490  | 2609 | 25   | 207  |  |

|                                                                                                                                                                           |                                                                                                                                                                                       |     |      |      |      |     |          |      |          |
|---------------------------------------------------------------------------------------------------------------------------------------------------------------------------|---------------------------------------------------------------------------------------------------------------------------------------------------------------------------------------|-----|------|------|------|-----|----------|------|----------|
| acy=0.996<br>cb8564_c90372/f1p0/2157<br>isoform=cb8564_c90372;full_length_coverage=1;non_full_length_coverage=0;isoform_length=2157;expected_accuracy=0.994               | cy=0.991<br>gnl BL_ORD_ID 11880      cb8564_c148138/f2p3/2537<br>isoform=cb8564_c148138;full_length_coverage=2;non_full_length_coverage=3;isoform_length=2537;expected_accuracy=0.991 | 1   | 1092 | 1091 | 2154 | 126 | 121<br>7 | 1392 | 245<br>5 |
| cb8564_c106740/f7p2/2421<br>isoform=cb8564_c106740;full_length_coverage=7;non_full_length_coverage=2;isoform_length=2421;expected_accuracy=1.000                          | gnl BL_ORD_ID 16625      cb8564_c72796/f1p0/2508<br>isoform=cb8564_c72796;full_length_coverage=1;non_full_length_coverage=0;isoform_length=2508;expected_accuracy=0.997               | 242 | 2421 | 62   | 244  | 315 | 249<br>4 | 20   | 200      |
| cb711_c1/f1p0/2532<br>isoform=cb711_c1;full_length_coverage=1;non_full_length_coverage=0;isoform_length=2532;expected_accuracy=0.992                                      | gnl BL_ORD_ID 5587      cb711_c4/f1p0/2827<br>isoform=cb711_c4;full_length_coverage=1;non_full_length_coverage=0;isoform_length=2827;expected_accuracy=0.997                          | 1   | 1548 | 1546 | 2532 | 1   | 155<br>7 | 1697 | 269<br>0 |
| cb5943_c9/f4p0/1361<br>isoform=cb5943_c9;full_length_coverage=4;non_full_length_coverage=0;isoform_length=1361;expected_accuracy=1.000                                    | gnl BL_ORD_ID 46197      cb5943_c4/f1p0/1485<br>isoform=cb5943_c4;full_length_coverage=1;non_full_length_coverage=0;isoform_length=1485;expected_accuracy=0.992                       | 328 | 1331 | 5    | 329  | 482 | 148<br>5 | 1    | 323      |
| cb8564_c23232/f1p3/2540<br>cb8564_c75969/f1p1/2798<br>isoform=cb8564_c75969;full_length_coverage=1;non_full_length_coverage=1;isoform_length=2798;expected_accuracy=0.997 | gnl BL_ORD_ID 55860      cb8564_c47209/f1p0/3227<br>gnl BL_ORD_ID 58074      cb8564_c88129/f1p3/3262                                                                                  | 19  | 2172 | 2167 | 2518 | 16  | 218<br>6 | 2288 | 263<br>6 |
| cb6271_c9/f1p0/1555<br>isoform=cb6271_c9;full_length_coverage=1;non_full_length_coverage=0;isoform_length=1555;expected_accuracy=0.997                                    | gnl BL_ORD_ID 49573      cb6271_c4/f1p0/2714                                                                                                                                          | 1   | 1364 | 1359 | 1555 | 17  | 138<br>1 | 2101 | 229<br>8 |



|                          |                     |                                                                                                                                                |     |      |      |      |      |          |      |          |
|--------------------------|---------------------|------------------------------------------------------------------------------------------------------------------------------------------------|-----|------|------|------|------|----------|------|----------|
| acy=1.000                |                     |                                                                                                                                                |     |      |      |      |      |          |      |          |
| cb8564_c118509/f1p2/2743 | gnl BL_ORD_ID 56903 | cb8564_c76255/f1p0/3009                                                                                                                        | 295 | 2701 | 6    | 294  | 446  | 284<br>9 | 3    | 291      |
| cb8564_c37079/f1p0/2659  | gnl BL_ORD_ID 16169 | cb8564_c66877/f3p0/2938<br>isoform=cb8564_c66877;full_length_coverage=3;non_full_length_coverage=0;isoform_length=2938;expected_accuracy=0.996 | 1   | 1322 | 1321 | 2423 | 60   | 138<br>0 | 1765 | 286<br>7 |
| cb8564_c25287/f1p0/2199  | gnl BL_ORD_ID 57291 | cb8564_c89181/f1p1/2994<br>isoform=cb8564_c25287;full_length_coverage=1;non_full_length_coverage=0;isoform_length=2199;expected_accuracy=0.993 | 1   | 1697 | 1694 | 2199 | 3    | 171<br>9 | 2317 | 282<br>3 |
| cb187_c14/f1p0/2733      | gnl BL_ORD_ID 34575 | cb187_c6/f9p1/4066<br>isoform=cb187_c14;full_length_coverage=1;non_full_length_coverage=0;isoform_length=2733;expected_accuracy=0.996          | 200 | 2733 | 1    | 199  | 1523 | 404<br>5 | 54   | 248      |
| cb6012_c15/f1p0/1851     | gnl BL_ORD_ID 45694 | cb6012_c7/f3p2/2205<br>isoform=cb6012_c7;full_length_coverage=3;non_full_length_coverage=2;isoform_length=2205;expected_accuracy=0.995         | 1   | 1030 | 1029 | 1847 | 23   | 105<br>2 | 1177 | 199<br>5 |
| cb2025_c3/f1p0/3798      | gnl BL_ORD_ID 35814 | cb2025_c4/f1p0/3760<br>isoform=cb2025_c4;full_length_coverage=1;non_full_length_coverage=0;isoform_length=3760;expected_accuracy=0.994         | 1   | 2392 | 2391 | 3589 | 71   | 245<br>8 | 2560 | 376<br>0 |
| cb6406_c65/f1p0/1830     | gnl BL_ORD_ID 47493 | cb6406_c21/f1p0/2190<br>isoform=cb6406_c65;full_length_coverage=1;non_full_length_coverage=0;isoform_length=1830;expected_accuracy=0.994       | 1   | 1055 | 1051 | 1830 | 77   | 1132     | 1348 | 212<br>8 |

|                                                                                                                   |                                                                                                                  |                         |    |      |      |      |    |      |      |      |
|-------------------------------------------------------------------------------------------------------------------|------------------------------------------------------------------------------------------------------------------|-------------------------|----|------|------|------|----|------|------|------|
| racy=0.992                                                                                                        |                                                                                                                  |                         |    |      |      |      |    |      |      |      |
| cb8041_c27/f1p2/2321                                                                                              | gnl BL_ORD_ID 8355                                                                                               | cb8041_c6/f1p0/2474     |    |      |      |      |    |      |      |      |
| isoform=cb8041_c27;full_length_coverage=1;non_full_length_coverage=2;isoform_length=2321;expected_accuracy=0.995  | isoform=cb8041_c6;full_length_coverage=1;non_full_length_coverage=0;isoform_length=2474;expected_accuracy=0.992  |                         | 1  | 1519 | 1517 | 2244 | 25 | 1530 | 1743 | 2467 |
| cb3270_c16/f1p0/3182                                                                                              | gnl BL_ORD_ID 41534                                                                                              | cb3270_c3/f1p0/3673     |    |      |      |      |    |      |      |      |
|                                                                                                                   | isoform=cb3270_c3;full_length_coverage=1;non_full_length_coverage=0;isoform_length=3673;expected_accuracy=0.997  |                         | 15 | 1713 | 1710 | 3087 | 1  | 1698 | 2302 | 3673 |
| cb3601_c12/f1p1/1820                                                                                              |                                                                                                                  |                         |    |      |      |      |    |      |      |      |
| isoform=cb3601_c12;full_length_coverage=1;non_full_length_coverage=1;isoform_length=1820;expected_accuracy=0.990  | gnl BL_ORD_ID 70507                                                                                              | cb3601_c9/f1p0/2122     | 1  | 1379 | 1378 | 1820 | 55 | 1432 | 1534 | 1975 |
| cb12931_c15/f1p0/1493                                                                                             |                                                                                                                  |                         |    |      |      |      |    |      |      |      |
| isoform=cb12931_c15;full_length_coverage=1;non_full_length_coverage=0;isoform_length=1493;expected_accuracy=1.000 | gnl BL_ORD_ID 56071                                                                                              | cb8564_c54161/f1p4/2912 | 1  | 1106 | 1104 | 1493 | 2  | 1103 | 2538 | 2926 |
| cb2195_c26/f1p0/2900                                                                                              | gnl BL_ORD_ID 36363                                                                                              | cb2195_c23/f1p0/3248    |    |      |      |      |    |      |      |      |
| isoform=cb2195_c26;full_length_coverage=1;non_full_length_coverage=0;isoform_length=2900;expected_accuracy=0.994  | isoform=cb2195_c23;full_length_coverage=1;non_full_length_coverage=0;isoform_length=3248;expected_accuracy=0.997 |                         | 1  | 1678 | 1675 | 2900 | 16 | 1694 | 1915 | 3140 |
| cb246_c3/f1p3/3304                                                                                                | gnl BL_ORD_ID 36939                                                                                              | cb246_c5/f1p2/3598      |    |      |      |      |    |      |      |      |
| isoform=cb246_c3;full_length_coverage=1;non_full_length_coverage=3;isoform_length=3304;expected_accuracy=0.997    | isoform=cb246_c5;full_length_coverage=1;non_full_length_coverage=2;isoform_length=3598;expected_accuracy=0.992   |                         | 1  | 2715 | 2712 | 3304 | 1  | 2712 | 2883 | 3473 |
| cb8564_c744/f5p1/2823                                                                                             | gnl BL_ORD_ID 18307                                                                                              | cb8564_c937/f3p0/2970   | 1  | 2157 | 2158 | 2821 | 1  | 215  | 2307 | 297  |

|                                                                                                                                                 |                                                                                                                                                                         |     |      |      |      |     |          |      |          |
|-------------------------------------------------------------------------------------------------------------------------------------------------|-------------------------------------------------------------------------------------------------------------------------------------------------------------------------|-----|------|------|------|-----|----------|------|----------|
| isoform=cb8564_c744;full_length_coverage=5;non_full_length_coverage=1;isoform_length=2823;expected_accuracy=0.996<br>cb17973_c53/f1p0/1649      | isoform=cb8564_c937;full_length_coverage=3;non_full_length_coverage=0;isoform_length=2970;expected_accuracy=0.999<br>gnl BL_ORD_ID 15467      cb8564_c48905/f1p0/2042   |     |      |      |      |     | 7        |      | 0        |
| isoform=cb17973_c53;full_length_coverage=1;non_full_length_coverage=0;isoform_length=1649;expected_accuracy=0.992<br>cb1220_c1/f2p1/2616        | isoform=cb8564_c48905;full_length_coverage=1;non_full_length_coverage=0;isoform_length=2042;expected_accuracy=0.995<br>gnl BL_ORD_ID 59274      cb1220_c8/f1p0/3488     | 186 | 1643 | 29   | 186  | 594 | 204<br>2 | 1    | 156      |
| isoform=cb1220_c1;full_length_coverage=2;non_full_length_coverage=1;isoform_length=2616;expected_accuracy=0.996<br>cb8564_c181853/f1p0/2119     | isoform=cb8564_c45150;full_length_coverage=1;non_full_length_coverage=0;isoform_length=2940;expected_accuracy=0.992<br>gnl BL_ORD_ID 14556      cb8564_c45150/f1p0/2940 | 1   | 1352 | 1351 | 2616 | 97  | 144<br>9 | 1965 | 323<br>3 |
| isoform=cb8564_c181853;full_length_coverage=1;non_full_length_coverage=0;isoform_length=2119;expected_accuracy=0.997<br>cb415_c47/f1p0/3141     | isoform=cb8564_c45150;full_length_coverage=1;non_full_length_coverage=0;isoform_length=2940;expected_accuracy=0.992<br>gnl BL_ORD_ID 72143      cb415_c84/f1p0/3822     | 1   | 1339 | 1334 | 2119 | 1   | 132<br>7 | 2152 | 293<br>4 |
| isoform=cb415_c47;full_length_coverage=1;non_full_length_coverage=0;isoform_length=3141;expected_accuracy=0.994<br>cb2527_c30/f1p0/3430         | isoform=cb415_c84;full_length_coverage=1;non_full_length_coverage=0;isoform_length=3822;expected_accuracy=0.994<br>gnl BL_ORD_ID 68590      cb2527_c17/f1p1/3542        | 17  | 2736 | 2734 | 3141 | 17  | 273<br>9 | 3304 | 3711     |
| isoform=cb2527_c30;full_length_coverage=1;non_full_length_coverage=0;isoform_length=3430;expected_accuracy=0.994<br>cb8564_c181853/f1p0/2119    | isoform=cb2527_c17;full_length_coverage=1;non_full_length_coverage=0;isoform_length=3542;expected_accuracy=0.994<br>gnl BL_ORD_ID 14836      cb8564_c41692/f1p3/2987    | 1   | 1878 | 1874 | 3175 | 29  | 190<br>6 | 2256 | 355<br>7 |
| isoform=cb8564_c181853;full_length_coverage=1;non_full_length_coverage=0;isoform_length=2119;expected_accuracy=0.997<br>cb8564_c50703/f1p0/3790 | isoform=cb8564_c41692;full_length_coverage=1;non_full_length_coverage=3;isoform_length=2987;expected_accuracy=0.995<br>gnl BL_ORD_ID 16695      cb8564_c53300/f1p1/4218 | 1   | 1339 | 1334 | 2116 | 1   | 135<br>5 | 2193 | 298<br>7 |
|                                                                                                                                                 |                                                                                                                                                                         | 168 | 3790 | 1    | 168  | 493 | 4116     | 1    | 168      |

|                                                                                                                                                 |                                                                                                                                                                                         |     |      |      |      |     |      |      |      |
|-------------------------------------------------------------------------------------------------------------------------------------------------|-----------------------------------------------------------------------------------------------------------------------------------------------------------------------------------------|-----|------|------|------|-----|------|------|------|
| isoform=cb8564_c50703;full_length_coverage=1;non_full_length_coverage=0;isoform_length=3790;expected_accuracy=1.000<br>cb1279_c85/f1p0/1794     | isoform=cb8564_c53300;full_length_coverage=1;non_full_length_coverage=1;isoform_length=4218;expected_accuracy=0.999<br>gnl BL_ORD_ID 25719                      cb1279_c37/f1p1/2816    | 1   | 1120 | 1115 | 1761 | 38  | 1154 | 2180 | 2816 |
| isoform=cb1279_c85;full_length_coverage=1;non_full_length_coverage=0;isoform_length=1794;expected_accuracy=0.998<br>cb373_c39/f1p0/4415         | isoform=cb1279_c37;full_length_coverage=1;non_full_length_coverage=1;isoform_length=2816;expected_accuracy=0.996<br>gnl BL_ORD_ID 40700                      cb373_c7/f1p0/3964         | 254 | 3731 | 16   | 253  | 489 | 3964 | 11   | 248  |
| isoform=cb8564_c185920;full_length_coverage=1;non_full_length_coverage=0;isoform_length=2777;expected_accuracy=0.996<br>cb8564_c90417/f1p0/2393 | gnl BL_ORD_ID 15496                      cb8564_c47853/f1p0/2927<br>isoform=cb8564_c47853;full_length_coverage=1;non_full_length_coverage=0;isoform_length=2927;expected_accuracy=0.991 | 174 | 2773 | 1    | 177  | 344 | 2927 | 15   | 188  |
| isoform=cb8564_c90417;full_length_coverage=1;non_full_length_coverage=0;isoform_length=2393;expected_accuracy=0.991<br>cb11071_c8/f1p0/1469     | gnl BL_ORD_ID 17649                      cb8564_c80259/f2p2/3241<br>isoform=cb8564_c80259;full_length_coverage=2;non_full_length_coverage=2;isoform_length=3241;expected_accuracy=1.000 | 1   | 1727 | 1724 | 2393 | 1   | 1733 | 2562 | 3230 |
| isoform=cb11071_c8;full_length_coverage=1;non_full_length_coverage=0;isoform_length=1469;expected_accuracy=0.997<br>cb3888_c8/f1p0/2800         | gnl BL_ORD_ID 3378                      cb11071_c3/f1p1/1705<br>isoform=cb11071_c3;full_length_coverage=1;non_full_length_coverage=1;isoform_length=1705;expected_accuracy=0.993        | 115 | 1469 | 1    | 115  | 309 | 1662 | 1    | 114  |
| isoform=cb3888_c8;full_length_coverage=1;non_full_length_coverage=0;isoform_length=2800;expected_accuracy=0.998                                 | gnl BL_ORD_ID 40212                      cb3888_c3/f1p0/3359<br>isoform=cb3888_c3;full_length_coverage=1;non_full_length_coverage=0;isoform_length=3359;expected_accuracy=0.998         | 243 | 2800 | 18   | 243  | 375 | 2930 | 1    | 226  |

|                                                                                                                      |                                                                                                                      |      |      |      |      |      |          |      |          |  |
|----------------------------------------------------------------------------------------------------------------------|----------------------------------------------------------------------------------------------------------------------|------|------|------|------|------|----------|------|----------|--|
| acy=0.996                                                                                                            | cy=0.995                                                                                                             |      |      |      |      |      |          |      |          |  |
| cb1333_c101/f1p0/1395                                                                                                |                                                                                                                      |      |      |      |      |      |          |      |          |  |
| isoform=cb1333_c101;full_length_coverage=1;non_full_length_coverage=0;isoform_length=1395;expected_accuracy=0.997    | gnl BL_ORD_ID 61249 cb1333_c68/f1p0/4817                                                                             | 149  | 1395 | 27   | 150  | 3538 | 478<br>2 | 29   | 152      |  |
| cb7636_c5/f1p0/1712                                                                                                  |                                                                                                                      |      |      |      |      |      |          |      |          |  |
| isoform=cb7636_c5;full_length_coverage=1;non_full_length_coverage=0;isoform_length=1712;expected_accuracy=0.997      | gnl BL_ORD_ID 51419 cb7636_c3/f1p0/2438                                                                              | 382  | 1712 | 7    | 382  | 1017 | 234<br>8 | 1    | 394      |  |
| cb8302_c8/f1p0/1717                                                                                                  | gnl BL_ORD_ID 9284 cb8302_c10/f6p0/2187                                                                              |      |      |      |      |      |          |      |          |  |
| isoform=cb8302_c8;full_length_coverage=1;non_full_length_coverage=0;isoform_length=1717;expected_accuracy=0.994      | isoform=cb8302_c10;full_length_coverage=6;non_full_length_coverage=0;isoform_length=2187;expected_accuracy=1.000     | 175  | 1717 | 5    | 178  | 547  | 208<br>9 | 1    | 174      |  |
| cb8564_c186356/f1p0/2744                                                                                             | gnl BL_ORD_ID 14263 cb8564_c42654/f1p1/2906                                                                          |      |      |      |      |      |          |      |          |  |
| isoform=cb8564_c186356;full_length_coverage=1;non_full_length_coverage=0;isoform_length=2744;expected_accuracy=0.998 | isoform=cb8564_c42654;full_length_coverage=1;non_full_length_coverage=1;isoform_length=2906;expected_accuracy=0.990  | 1393 | 2723 | 1    | 1396 | 1492 | 282<br>4 | 1    | 137<br>1 |  |
| cb8564_c40978/f1p0/3073                                                                                              | gnl BL_ORD_ID 18852 cb8564_c84488/f1p0/3408                                                                          |      |      |      |      |      |          |      |          |  |
| isoform=cb8564_c40978;full_length_coverage=1;non_full_length_coverage=0;isoform_length=3073;expected_accuracy=0.996  | isoform=cb8564_c84488;full_length_coverage=1;non_full_length_coverage=0;isoform_length=3408;expected_accuracy=0.996  | 228  | 2845 | 1    | 228  | 790  | 340<br>8 | 1    | 217      |  |
| cb12244_c1/f1p2/1884                                                                                                 | gnl BL_ORD_ID 11394 cb8564_c150120/f1p3/2376                                                                         |      |      |      |      |      |          |      |          |  |
| isoform=cb12244_c1;full_length_coverage=1;non_full_length_coverage=2;isoform_length=1884;expected_accuracy=0.999     | isoform=cb8564_c150120;full_length_coverage=1;non_full_length_coverage=3;isoform_length=2376;expected_accuracy=1.000 | 1    | 1048 | 1048 | 1884 | 29   | 107<br>2 | 1539 | 237<br>5 |  |
| cb2804_c166/f1p0/1682                                                                                                | gnl BL_ORD_ID 38911 cb2804_c50/f2p0/2193                                                                             | 161  | 1448 | 31   | 163  | 619  | 190      | 1    | 133      |  |

|                       |                                                                                                                                                                                     |     |      |      |      |     |      |      |      |  |  |
|-----------------------|-------------------------------------------------------------------------------------------------------------------------------------------------------------------------------------|-----|------|------|------|-----|------|------|------|--|--|
|                       | isoform=cb2804_c50;full_length_coverage=2;non_full_length_coverage=0;isoform_length=2193;expected_accuracy=0.992                                                                    |     |      |      |      |     |      |      | 5    |  |  |
| cb7388_c2/f1p0/2288   | gnl BL_ORD_ID 7290                      cb7388_c1/f1p0/2631<br>isoform=cb7388_c1;full_length_coverage=1;non_full_length_coverage=0;isoform_length=2631;expected_accuracy=0.999      | 1   | 1860 | 1857 | 2312 | 5   | 1864 | 2178 | 2630 |  |  |
| cb5058_c4/f1p0/2291   | gnl BL_ORD_ID 44021                      cb5058_c2/f1p0/2666<br>isoform=cb5058_c4;full_length_coverage=1;non_full_length_coverage=0;isoform_length=2291;expected_accuracy=0.997     | 1   | 2061 | 2056 | 2288 | 276 | 2328 | 2431 | 2666 |  |  |
| cb273_c4/f1p0/1772    | gnl BL_ORD_ID 37356                      cb273_c3/f1p0/2380<br>isoform=cb273_c4;full_length_coverage=1;non_full_length_coverage=0;isoform_length=1772;expected_accuracy=0.999       | 1   | 1084 | 1084 | 1772 | 484 | 1559 | 1699 | 2380 |  |  |
| cb4016_c10/f1p0/2636  | gnl BL_ORD_ID 71723                      cb4016_c11/f1p0/2688<br>isoform=cb4016_c10;full_length_coverage=1;non_full_length_coverage=0;isoform_length=2636;expected_accuracy=0.992   | 1   | 1896 | 1896 | 2589 | 8   | 1908 | 2016 | 2711 |  |  |
| cb12972_c15/f1p0/1541 | gnl BL_ORD_ID 62024                      cb12972_c37/f1p0/1779<br>isoform=cb12972_c15;full_length_coverage=1;non_full_length_coverage=0;isoform_length=1541;expected_accuracy=0.996 | 295 | 1541 | 7    | 300  | 447 | 1684 | 1    | 294  |  |  |
| cb4493_c13/f1p1/4300  | gnl BL_ORD_ID 43098                      cb4493_c10/f1p2/4658<br>isoform=cb4493_c13;full_length_coverage=1;non_full_length_coverage=1;isoform_length=4300;expected_accuracy=0.992   | 112 | 2669 | 2667 | 4295 | 1   | 2558 | 2961 | 4590 |  |  |

|                                                                                                                                                  |                                                                                                                                                                    |     |      |      |      |     |          |      |          |  |
|--------------------------------------------------------------------------------------------------------------------------------------------------|--------------------------------------------------------------------------------------------------------------------------------------------------------------------|-----|------|------|------|-----|----------|------|----------|--|
| racy=0.992                                                                                                                                       | acy=0.993                                                                                                                                                          |     |      |      |      |     |          |      |          |  |
| cb8564_c40598/f1p4/3119                                                                                                                          | gnl BL_ORD_ID 55437 cb8564_c41690/f1p1/3409                                                                                                                        | 1   | 2732 | 2729 | 3053 | 1   | 273<br>5 | 2856 | 318<br>0 |  |
| cb7521_c46/f1p0/2168                                                                                                                             | gnl BL_ORD_ID 50571 cb7521_c26/f1p0/2812                                                                                                                           | 1   | 1630 | 1626 | 2041 | 252 | 188<br>0 | 2081 | 249<br>6 |  |
| cb14619_c9/f1p0/1471<br>isoform=cb14619_c9;full_length_coverage=1;non_full_length_coverage=0;isoform_length=1471;expected_accuracy=1.000         | gnl BL_ORD_ID 54844 cb8564_c3057/f1p0/2651                                                                                                                         | 1   | 1196 | 1198 | 1471 | 13  | 121<br>3 | 2127 | 240<br>2 |  |
| cb8564_c146882/f3p8/4113<br>isoform=cb8564_c146882;full_length_coverage=3;non_full_length_coverage=8;isoform_length=4113;expected_accuracy=0.998 | gnl BL_ORD_ID 14293 cb8564_c46212/f3p1/4373<br>isoform=cb8564_c46212;full_length_coverage=3;non_full_length_coverage=1;isoform_length=4373;expected_accuracy=0.999 | 1   | 3169 | 3165 | 4113 | 1   | 316<br>0 | 3424 | 437<br>2 |  |
| cb9199_c4/f4p0/1836<br>isoform=cb9199_c4;full_length_coverage=4;non_full_length_coverage=0;isoform_length=1836;expected_accuracy=1.000           | gnl BL_ORD_ID 20905 cb9199_c13/f1p0/2081<br>isoform=cb9199_c13;full_length_coverage=1;non_full_length_coverage=0;isoform_length=2081;expected_accuracy=0.995       | 304 | 1836 | 9    | 303  | 496 | 203<br>0 | 1    | 293      |  |
| cb8564_c72680/f1p0/2685                                                                                                                          | gnl BL_ORD_ID 18962 cb8564_c79723/f1p6/3025<br>isoform=cb8564_c79723;full_length_coverage=1;non_full_length_coverage=6;isoform_length=3025;expected_accuracy=0.999 | 1   | 1735 | 1730 | 2635 | 206 | 194<br>1 | 2120 | 302<br>5 |  |
| cb8564_c11802/f1p0/3687<br>isoform=cb8564_c11802;full_length_coverage=1;non_full_length_coverage=0;isoform_length=3687;expected_accuracy=1.000   | gnl BL_ORD_ID 55146 cb8564_c25395/f1p0/4267                                                                                                                        | 12  | 2152 | 2151 | 3683 | 5   | 215<br>1 | 2619 | 415<br>1 |  |
| cb8564_c34965/f1p0/2700                                                                                                                          | gnl BL_ORD_ID 57063 cb8564_c82099/f1p2/3297                                                                                                                        | 1   | 1485 | 1481 | 2687 | 40  | 152      | 1934 | 314      |  |

|                                                                                                                                                  |                                                                                                                                                                    |     |      |      |      |     |          |      |          |
|--------------------------------------------------------------------------------------------------------------------------------------------------|--------------------------------------------------------------------------------------------------------------------------------------------------------------------|-----|------|------|------|-----|----------|------|----------|
|                                                                                                                                                  |                                                                                                                                                                    |     |      |      |      |     |          | 4    | 0        |
| cb4233_c84/f1p1/2344                                                                                                                             | gnl BL_ORD_ID 71861 cb4233_c130/f1p0/2863                                                                                                                          | 227 | 2381 | 1    | 225  | 570 | 272<br>4 | 546  | 770      |
| cb8564_c82332/f1p0/2714<br>isoform=cb8564_c82332;full_length_coverage=1;non_full_length_coverage=0;isoform_length=2714;expected_accuracy=0.994   | gnl BL_ORD_ID 56896 cb8564_c75866/f1p0/3458                                                                                                                        | 374 | 2714 | 50   | 374  | 852 | 319<br>6 | 1    | 332      |
| cb8564_c69975/f1p0/2818<br>isoform=cb8564_c69975;full_length_coverage=1;non_full_length_coverage=0;isoform_length=2818;expected_accuracy=0.999   | gnl BL_ORD_ID 58178 cb8564_c90729/f1p0/2969                                                                                                                        | 260 | 2818 | 16   | 259  | 408 | 296<br>6 | 29   | 246      |
| cb8564_c41115/f1p3/2751                                                                                                                          | gnl BL_ORD_ID 55873 cb8564_c47701/f1p0/3144                                                                                                                        | 15  | 1542 | 1539 | 2690 | 24  | 154<br>9 | 1721 | 287<br>3 |
| cb8564_c37361/f1p0/3076                                                                                                                          | gnl BL_ORD_ID 56275 cb8564_c73216/f1p0/3006                                                                                                                        | 21  | 2481 | 2477 | 3070 | 28  | 246<br>2 | 2563 | 315<br>6 |
| cb8564_c45300/f1p4/3014<br>isoform=cb8564_c45300;full_length_coverage=1;non_full_length_coverage=4;isoform_length=3014;expected_accuracy=0.996   | gnl BL_ORD_ID 53680 cb8564_c153222/f2p39/3454                                                                                                                      | 243 | 3005 | 1    | 246  | 406 | 317<br>0 | 7    | 249      |
| cb8564_c185920/f1p0/2777<br>isoform=cb8564_c185920;full_length_coverage=1;non_full_length_coverage=0;isoform_length=2777;expected_accuracy=0.996 | gnl BL_ORD_ID 16473 cb8564_c51923/f1p1/2966<br>isoform=cb8564_c51923;full_length_coverage=1;non_full_length_coverage=1;isoform_length=2966;expected_accuracy=0.997 | 174 | 2777 | 1    | 177  | 361 | 296<br>6 | 18   | 203      |
| cb8564_c24391/f1p1/2764<br>isoform=cb8564_c24391;full_length_coverage=1;non_full_length_coverage=1;isoform_length=2764;expected_                 | gnl BL_ORD_ID 58202 cb8564_c91398/f1p0/3444                                                                                                                        | 1   | 1714 | 1713 | 2764 | 37  | 176<br>6 | 2023 | 307<br>7 |



|                                                                                                                   |                                                                                                                     |                         |     |      |      |      |      |      |      |      |
|-------------------------------------------------------------------------------------------------------------------|---------------------------------------------------------------------------------------------------------------------|-------------------------|-----|------|------|------|------|------|------|------|
| accuracy=1.000                                                                                                    |                                                                                                                     |                         |     |      |      |      |      |      |      |      |
| cb13495_c1/f1p1/1287                                                                                              | gnl BL_ORD_ID 16241                                                                                                 | cb8564_c76946/f4p0/2069 |     |      |      |      |      |      |      |      |
| isoform=cb13495_c1;full_length_coverage=1;non_full_length_coverage=1;isoform_length=1287;expected_accuracy=1.000  | isoform=cb8564_c76946;full_length_coverage=4;non_full_length_coverage=0;isoform_length=2069;expected_accuracy=0.998 |                         | 332 | 1287 | 6    | 334  | 1047 | 2002 | 1    | 329  |
| cb1333_c101/f1p0/1395                                                                                             | gnl BL_ORD_ID 61250                                                                                                 | cb1333_c73/f1p0/4863    |     |      |      |      |      |      |      |      |
| isoform=cb1333_c101;full_length_coverage=1;non_full_length_coverage=0;isoform_length=1395;expected_accuracy=0.997 |                                                                                                                     |                         | 149 | 1395 | 27   | 150  | 3442 | 4686 | 29   | 152  |
| cb5469_c6/f1p0/2317                                                                                               | gnl BL_ORD_ID 44581                                                                                                 | cb5469_c3/f1p0/2770     |     |      |      |      |      |      |      |      |
|                                                                                                                   | isoform=cb5469_c3;full_length_coverage=1;non_full_length_coverage=0;isoform_length=2770;expected_accuracy=0.993     |                         | 268 | 2229 | 32   | 269  | 809  | 2770 | 90   | 327  |
| cb3007_c18/f1p0/3150                                                                                              | gnl BL_ORD_ID 37278                                                                                                 | cb3007_c3/f1p0/3424     |     |      |      |      |      |      |      |      |
|                                                                                                                   | isoform=cb3007_c3;full_length_coverage=1;non_full_length_coverage=0;isoform_length=3424;expected_accuracy=0.991     |                         | 880 | 2940 | 9    | 881  | 1346 | 3424 | 1    | 876  |
| cb2737_c40/f1p0/2830                                                                                              | gnl BL_ORD_ID 38134                                                                                                 | cb2737_c22/f1p0/3196    |     |      |      |      |      |      |      |      |
|                                                                                                                   | isoform=cb2737_c22;full_length_coverage=1;non_full_length_coverage=0;isoform_length=3196;expected_accuracy=0.995    |                         | 1   | 1397 | 1395 | 2651 | 377  | 1763 | 1894 | 3128 |
| cb9436_c13/f1p0/2211                                                                                              | gnl BL_ORD_ID 21678                                                                                                 | cb9436_c4/f1p0/2516     |     |      |      |      |      |      |      |      |
|                                                                                                                   | isoform=cb9436_c4;full_length_coverage=1;non_full_length_coverage=0;isoform_length=2516;expected_accuracy=0.998     |                         | 696 | 2125 | 72   | 697  | 1088 | 2516 | 1    | 627  |
| cb16997_c22/f1p0/1844                                                                                             | gnl BL_ORD_ID 31858                                                                                                 | cb16997_c84/f1p0/2527   |     |      |      |      |      |      |      |      |
|                                                                                                                   |                                                                                                                     |                         | 12  | 1451 | 1446 | 1775 | 1    | 143  | 2199 | 252  |

|                                                                                                                   |                                                                                                                    |     |      |      |      |     |  |      |      |      |
|-------------------------------------------------------------------------------------------------------------------|--------------------------------------------------------------------------------------------------------------------|-----|------|------|------|-----|--|------|------|------|
| isoform=cb16997_c22;full_length_coverage=1;non_full_length_coverage=0;isoform_length=1844;expected_accuracy=0.994 | isoform=cb16997_c84;full_length_coverage=1;non_full_length_coverage=0;isoform_length=2527;expected_accuracy=0.996  |     |      |      |      |     |  | 7    |      | 7    |
| cb7214_c10/f1p0/1871                                                                                              | gnl BL_ORD_ID 51049 cb7214_c9/f1p0/2049                                                                            | 134 | 1886 | 1    | 136  | 268 |  | 2020 | 22   | 157  |
| cb6247_c2/f1p0/2904                                                                                               | gnl BL_ORD_ID 47407 cb6247_c3/f1p0/3766                                                                            | 18  | 2056 | 2054 | 2780 | 1   |  | 2045 | 2994 | 3720 |
| isoform=cb6247_c2;full_length_coverage=1;non_full_length_coverage=0;isoform_length=2904;expected_accuracy=0.996   |                                                                                                                    |     |      |      |      |     |  |      |      |      |
| cb8564_c905/f7p9/2409                                                                                             | gnl BL_ORD_ID 15303 cb8564_c3481/f1p0/2830                                                                         |     |      |      |      |     |  |      |      |      |
| isoform=cb8564_c905;full_length_coverage=7;non_full_length_coverage=9;isoform_length=2409;expected_accuracy=1.000 | isoform=cb8564_c3481;full_length_coverage=1;non_full_length_coverage=0;isoform_length=2830;expected_accuracy=0.995 | 1   | 1668 | 1664 | 2337 | 3   |  | 1676 | 2158 | 2830 |
| cb5963_c1/f1p0/2966                                                                                               | gnl BL_ORD_ID 46501 cb5963_c2/f1p0/3029                                                                            |     |      |      |      |     |  |      |      |      |
| isoform=cb5963_c1;full_length_coverage=1;non_full_length_coverage=0;isoform_length=2966;expected_accuracy=0.994   | isoform=cb5963_c2;full_length_coverage=1;non_full_length_coverage=0;isoform_length=3029;expected_accuracy=0.993    | 1   | 1809 | 1807 | 2907 | 1   |  | 1814 | 1926 | 3029 |
| cb1259_c21/f1p0/3481                                                                                              | gnl BL_ORD_ID 23434 cb1259_c4/f1p0/4412                                                                            |     |      |      |      |     |  |      |      |      |
| isoform=cb1259_c4;full_length_coverage=1;non_full_length_coverage=0;isoform_length=4412;expected_accuracy=0.995   |                                                                                                                    | 29  | 3003 | 3003 | 3258 | 13  |  | 2985 | 4158 | 4411 |
| cb2779_c5/f1p0/1790                                                                                               | gnl BL_ORD_ID 69969 cb2779_c1/f1p1/3812                                                                            |     |      |      |      |     |  |      |      |      |
| isoform=cb2779_c5;full_length_coverage=1;non_full_length_coverage=0;isoform_length=1790;expected_accuracy=0.993   |                                                                                                                    | 1   | 1078 | 1077 | 1788 | 14  |  | 1093 | 2971 | 3679 |
| cb8564_c122989/f1p0/4055                                                                                          | gnl BL_ORD_ID 9374 cb8564_c109035/f10p1/3794                                                                       |     |      |      |      |     |  |      |      |      |
|                                                                                                                   |                                                                                                                    | 10  | 2587 | 2588 | 3750 | 144 |  | 275  | 2629 | 379  |

|                                                                                                                      |                                                                                                                       |                          |     |      |      |      |     |      |       |      |
|----------------------------------------------------------------------------------------------------------------------|-----------------------------------------------------------------------------------------------------------------------|--------------------------|-----|------|------|------|-----|------|-------|------|
|                                                                                                                      | isoform=cb8564_c109035;full_length_coverage=10;non_full_length_coverage=1;isoform_length=3794;expected_accuracy=1.000 |                          |     |      |      |      | 4   |      | 1     |      |
| cb7771_c6/f1p0/2053                                                                                                  | gnl BL_ORD_ID 7436                                                                                                    | cb7771_c3/f1p0/2176      |     |      |      |      |     |      |       |      |
| isoform=cb7771_c6;full_length_coverage=1;non_full_length_coverage=0;isoform_length=2053;expected_accuracy=0.998      | isoform=cb7771_c3;full_length_coverage=1;non_full_length_coverage=0;isoform_length=2176;expected_accuracy=0.994       |                          | 1   | 1327 | 1325 | 2053 | 1   | 1329 | 14327 | 2157 |
| cb6161_c3/f2p1/1827                                                                                                  | gnl BL_ORD_ID 46442                                                                                                   | cb6161_c4/f2p0/2920      |     |      |      |      |     |      |       |      |
| isoform=cb6161_c3;full_length_coverage=2;non_full_length_coverage=1;isoform_length=1827;expected_accuracy=0.991      | isoform=cb6161_c4;full_length_coverage=2;non_full_length_coverage=0;isoform_length=2920;expected_accuracy=1.000       |                          | 148 | 1827 | 1    | 148  | 920 | 2599 | 5     | 148  |
| cb8564_c45300/f1p4/3014                                                                                              | gnl BL_ORD_ID 17429                                                                                                   | cb8564_c85447/f1p0/3196  |     |      |      |      |     |      |       |      |
| isoform=cb8564_c45300;full_length_coverage=1;non_full_length_coverage=4;isoform_length=3014;expected_accuracy=0.996  | isoform=cb8564_c85447;full_length_coverage=1;non_full_length_coverage=0;isoform_length=3196;expected_accuracy=0.997   |                          | 243 | 3014 | 1    | 246  | 399 | 3193 | 3     | 242  |
| cb3941_c43/f1p0/4055                                                                                                 | gnl BL_ORD_ID 40540                                                                                                   | cb3941_c39/f1p0/4473     |     |      |      |      |     |      |       |      |
| isoform=cb3941_c39;full_length_coverage=1;non_full_length_coverage=0;isoform_length=4473;expected_accuracy=0.994     | isoform=cb3941_c39;full_length_coverage=1;non_full_length_coverage=0;isoform_length=4473;expected_accuracy=0.994      |                          | 318 | 4096 | 1    | 318  | 484 | 4255 | 11    | 326  |
| cb8564_c69975/f1p0/2818                                                                                              | gnl BL_ORD_ID 18398                                                                                                   | cb8564_c90428/f1p0/2987  |     |      |      |      |     |      |       |      |
| isoform=cb8564_c69975;full_length_coverage=1;non_full_length_coverage=0;isoform_length=2818;expected_accuracy=0.999  | isoform=cb8564_c90428;full_length_coverage=1;non_full_length_coverage=0;isoform_length=2987;expected_accuracy=0.996   |                          | 260 | 2818 | 1    | 259  | 422 | 2945 | 1     | 260  |
| cb8564_c110210/f1p0/2628                                                                                             | gnl BL_ORD_ID 9685                                                                                                    | cb8564_c115488/f1p1/3915 |     |      |      |      |     |      |       |      |
| isoform=cb8564_c110210;full_length_coverage=1;non_full_length_coverage=0;isoform_length=2628;expected_accuracy=0.999 | isoform=cb8564_c115488;full_length_coverage=1;non_full_length_coverage=1;isoform_length=3915;expected_accuracy=0.999  |                          | 1   | 1869 | 1868 | 2627 | 17  | 1890 | 3155  | 3915 |

|                          |                                                                                                                                                                                           |      |      |      |      |      |      |      |      |
|--------------------------|-------------------------------------------------------------------------------------------------------------------------------------------------------------------------------------------|------|------|------|------|------|------|------|------|
| _accuracy=0.995          | ccuracy=0.993                                                                                                                                                                             |      |      |      |      |      |      |      |      |
| cb5808_c3/f1p0/2793      | gnl BL_ORD_ID 46403                      cb5808_c2/f1p0/3006<br>isoform=cb5808_c2;full_length_coverage=1;non_full_length_coverage=0;isoform_length=3006;expected_accuracy=0.996           | 1    | 2080 | 2079 | 2587 | 39   | 2119 | 2471 | 2979 |
| cb3039_c11/f1p0/3305     | gnl BL_ORD_ID 69064   cb3039_c7/f1p0/3656                                                                                                                                                 | 131  | 3353 | 1    | 135  | 279  | 3501 | 19   | 153  |
| cb280_c75/f1p0/3730      | gnl BL_ORD_ID 68157   cb280_c88/f1p0/5515                                                                                                                                                 | 307  | 3609 | 13   | 306  | 2181 | 5483 | 3    | 295  |
| cb8564_c128290/f1p0/2765 | gnl BL_ORD_ID 11608                      cb8564_c146551/f1p1/3093<br>isoform=cb8564_c128290;full_length_coverage=1;non_full_length_coverage=0;isoform_length=2765;expected_accuracy=0.996 | 1    | 1820 | 1820 | 2765 | 84   | 1903 | 2032 | 2978 |
| cb1406_c5/f1p0/2334      | gnl BL_ORD_ID 25273                      cb1406_c13/f1p1/5633<br>isoform=cb1406_c5;full_length_coverage=1;non_full_length_coverage=0;isoform_length=2334;expected_accuracy=0.996          | 214  | 2334 | 11   | 218  | 3505 | 5629 | 1    | 207  |
| cb8564_c179457/f1p0/2647 | gnl BL_ORD_ID 9350                      cb8564_c11826/f1p0/2916<br>isoform=cb8564_c179457;full_length_coverage=1;non_full_length_coverage=0;isoform_length=2647;expected_accuracy=1.000   | 1273 | 2646 | 1    | 1274 | 1543 | 2916 | 4    | 1296 |
| cb8564_c44258/f1p0/3202  | gnl BL_ORD_ID 16149                      cb8564_c47162/f1p0/3361<br>isoform=cb8564_c44258;full_length_coverage=1;non_full_length_coverage=0;isoform_length=3202;expected_accuracy=0.993   | 408  | 3202 | 5    | 409  | 592  | 3353 | 5    | 402  |
| cb2645_c20/f3p0/3491     | gnl BL_ORD_ID 37179                      cb2645_c5/f1p0/3610                                                                                                                              | 1    | 2875 | 2872 | 3491 | 24   | 289  | 2994 | 361  |

|                                                                                                                  |                                                                                                                                                                                           |     |      |      |      |     |      |      |      |
|------------------------------------------------------------------------------------------------------------------|-------------------------------------------------------------------------------------------------------------------------------------------------------------------------------------------|-----|------|------|------|-----|------|------|------|
| isoform=cb2645_c20;full_length_coverage=3;non_full_length_coverage=0;isoform_length=3491;expected_accuracy=1.000 | isoform=cb2645_c5;full_length_coverage=1;non_full_length_coverage=0;isoform_length=3610;expected_accuracy=0.996                                                                           |     |      |      |      |     |      | 3    | 0    |
| cb2430_c18/f1p0/3122                                                                                             | gnl BL_ORD_ID 38548                      cb2430_c4/f2p0/3285<br>isoform=cb2430_c4;full_length_coverage=2;non_full_length_coverage=0;isoform_length=3285;expected_accuracy=0.992           | 1   | 1838 | 1836 | 2427 | 4   | 1837 | 2245 | 2833 |
| cb5896_c154/f1p0/2291                                                                                            | gnl BL_ORD_ID 44479                      cb5896_c55/f1p0/2592<br>isoform=cb5896_c154;full_length_coverage=1;non_full_length_coverage=0;isoform_length=2291;expected_accuracy=0.998        | 1   | 1681 | 1680 | 2291 | 51  | 1727 | 1937 | 2548 |
| cb8637_c58/f1p0/1789                                                                                             | gnl BL_ORD_ID 17073                      cb8637_c67/f7p0/1947<br>isoform=cb8637_c58;full_length_coverage=1;non_full_length_coverage=0;isoform_length=1789;expected_accuracy=0.990         | 1   | 1332 | 1332 | 1773 | 73  | 1404 | 1507 | 1947 |
| cb8564_c40598/f1p4/3119                                                                                          | gnl BL_ORD_ID 12913                      cb8564_c182049/f1p0/3195<br>isoform=cb8564_c182049;full_length_coverage=1;non_full_length_coverage=0;isoform_length=3195;expected_accuracy=0.997 | 1   | 2732 | 2729 | 3053 | 1   | 2748 | 2871 | 3195 |
| cb8564_c49562/f1p0/2838                                                                                          | gnl BL_ORD_ID 57175                      cb8564_c85646/f1p0/3480<br>isoform=cb8564_c49562;full_length_coverage=1;non_full_length_coverage=0;isoform_length=2838;expected_accuracy=0.995   | 23  | 2331 | 2327 | 2829 | 106 | 2419 | 2526 | 3030 |
| cb8564_c10736/f3p10/3904                                                                                         | gnl BL_ORD_ID 11693                      cb8564_c13094/f1p5/4181<br>isoform=cb8564_c10736;full_length_coverage=3;non_full_length_coverage=10;isoform_length=3904;expected                 | 131 | 3264 | 3265 | 3904 | 1   | 3132 | 3542 | 4181 |

|                                                                                                                                                         |                                                                                                                                                                                                 |     |      |      |      |     |          |      |          |
|---------------------------------------------------------------------------------------------------------------------------------------------------------|-------------------------------------------------------------------------------------------------------------------------------------------------------------------------------------------------|-----|------|------|------|-----|----------|------|----------|
| _accuracy=0.998<br>cb606_c5/f1p1/3393<br>isoform=cb606_c5;full_length_coverage=1;non_full_length_coverage=1;isoform_length=3393;expected_accuracy=0.998 | curacy=0.999<br>gnl BL_ORD_ID 46196                      cb606_c14/f1p4/4386<br>isoform=cb606_c14;full_length_coverage=1;non_full_length_coverage=4;isoform_length=4386;expected_accuracy=0.997 | 1   | 3229 | 3228 | 3393 | 5   | 323<br>6 | 3986 | 415<br>1 |
| cb396_c48/f1p0/2172                                                                                                                                     | gnl BL_ORD_ID 70867   cb396_c51/f1p1/2465                                                                                                                                                       | 238 | 2054 | 3    | 238  | 496 | 231<br>2 | 12   | 247      |
| cb2707_c10/f3p0/2850<br>isoform=cb2707_c10;full_length_coverage=3;non_full_length_coverage=0;isoform_length=2850;expected_accuracy=1.000                | gnl BL_ORD_ID 36994                      cb2707_c29/f1p1/3207<br>isoform=cb2707_c29;full_length_coverage=1;non_full_length_coverage=1;isoform_length=3207;expected_accuracy=0.991               | 2   | 2379 | 2379 | 2850 | 1   | 238<br>2 | 2707 | 317<br>8 |
| cb8564_c54518/f1p0/2781                                                                                                                                 | gnl BL_ORD_ID 11821                      cb8564_c15227/f1p0/3770<br>isoform=cb8564_c15227;full_length_coverage=1;non_full_length_coverage=0;isoform_length=3770;expected_accuracy=0.999         | 1   | 1587 | 1585 | 2793 | 34  | 162<br>0 | 2519 | 372<br>7 |
| cb8564_c15771/f1p1/3660                                                                                                                                 | gnl BL_ORD_ID 14775                      cb8564_c31987/f2p1/3601<br>isoform=cb8564_c31987;full_length_coverage=2;non_full_length_coverage=1;isoform_length=3601;expected_accuracy=0.993         | 1   | 2711 | 2712 | 3436 | 5   | 270<br>6 | 2854 | 357<br>6 |
| cb8564_c42019/f1p0/3526                                                                                                                                 | gnl BL_ORD_ID 55939   cb8564_c49630/f1p4/3487                                                                                                                                                   | 130 | 3008 | 3008 | 3257 | 35  | 291<br>3 | 3243 | 349<br>2 |
| cb626_c67/f1p1/4388                                                                                                                                     | gnl BL_ORD_ID 4060                      cb626_c17/f1p0/4935<br>isoform=cb626_c17;full_length_coverage=1;non_full_length_coverage=0;isoform_length=4935;expected_accuracy=0.993                  | 111 | 3749 | 3749 | 4309 | 12  | 362<br>9 | 4370 | 492<br>6 |
| cb8564_c40598/f1p4/3119                                                                                                                                 | gnl BL_ORD_ID 56002   cb8564_c51722/f1p1/3503                                                                                                                                                   | 23  | 2732 | 2729 | 3056 | 67  | 277      | 2893 | 321      |

|                                                                                                                      |                     |                           |     |      |      |      |      |          |      |          |
|----------------------------------------------------------------------------------------------------------------------|---------------------|---------------------------|-----|------|------|------|------|----------|------|----------|
|                                                                                                                      |                     |                           |     |      |      |      |      | 2        | 9    |          |
| cb7642_c201/f1p0/1831                                                                                                |                     |                           |     |      |      |      |      |          |      |          |
| isoform=cb7642_c201;full_length_coverage=1;non_full_length_coverage=0;isoform_length=1831;expected_accuracy=0.992    | gnl BL_ORD_ID 51433 | cb7642_c125/f1p0/2713     | 1   | 1029 | 1028 | 1831 | 108  | 1145     | 1364 | 217<br>1 |
| cb5125_c8/f3p3/2148                                                                                                  | gnl BL_ORD_ID 43457 | cb5125_c11/f2p1/2545      |     |      |      |      |      |          |      |          |
| isoform=cb5125_c8;full_length_coverage=3;non_full_length_coverage=3;isoform_length=2148;expected_accuracy=0.999      | gnl BL_ORD_ID 43457 | cb5125_c11/f2p1/2545      | 1   | 1290 | 1288 | 2056 | 46   | 133<br>6 | 1778 | 254<br>5 |
| cb15243_c1/f1p0/1809                                                                                                 | gnl BL_ORD_ID 10268 | cb8564_c111650/f1p0/2370  |     |      |      |      |      |          |      |          |
| isoform=cb15243_c1;full_length_coverage=1;non_full_length_coverage=0;isoform_length=1809;expected_accuracy=0.992     | gnl BL_ORD_ID 10268 | cb8564_c111650/f1p0/2370  | 113 | 1808 | 1    | 112  | 485  | 216<br>3 | 122  | 233      |
| cb8564_c28079/f2p1/2021                                                                                              | gnl BL_ORD_ID 13165 | cb8564_c17237/f1p1/2698   |     |      |      |      |      |          |      |          |
| isoform=cb8564_c28079;full_length_coverage=2;non_full_length_coverage=1;isoform_length=2021;expected_accuracy=0.998  | gnl BL_ORD_ID 13165 | cb8564_c17237/f1p1/2698   | 398 | 2017 | 44   | 395  | 1079 | 269<br>7 | 1    | 338      |
| cb13938_c10/f1p0/1187                                                                                                | gnl BL_ORD_ID 72022 | cb4825_c13/f1p0/4647      |     |      |      |      |      |          |      |          |
| isoform=cb13938_c10;full_length_coverage=1;non_full_length_coverage=0;isoform_length=1187;expected_accuracy=0.996    | gnl BL_ORD_ID 72022 | cb4825_c13/f1p0/4647      | 151 | 1197 | 4    | 150  | 3608 | 464<br>9 | 2595 | 274<br>1 |
| cb8564_c188097/f1p0/2552                                                                                             | gnl BL_ORD_ID 13065 | cb8564_c157334/f1p21/2777 |     |      |      |      |      |          |      |          |
| isoform=cb8564_c188097;full_length_coverage=1;non_full_length_coverage=0;isoform_length=2552;expected_accuracy=0.996 | gnl BL_ORD_ID 13065 | cb8564_c157334/f1p21/2777 | 1   | 1945 | 1940 | 2552 | 7    | 195<br>8 | 2061 | 267<br>3 |
| cb1772_c26/f1p0/3767                                                                                                 | gnl BL_ORD_ID 66372 | cb1772_c16/f1p1/4029      |     |      |      |      |      |          |      |          |
| isoform=cb1772_c26;full_length_coverage=1;non_full_length_coverage=0;isoform_length=3767;expected_accuracy=0.996     | gnl BL_ORD_ID 66372 | cb1772_c16/f1p1/4029      | 232 | 3695 | 13   | 234  | 430  | 389<br>4 | 25   | 246      |
| cb124_c2/f4p0/2458                                                                                                   | gnl BL_ORD_ID 23061 | cb124_c8/f2p0/3745        |     |      |      |      |      |          |      |          |
| isoform=cb124_c2;full_length_coverage=1;non_full_length_coverage=0;isoform_length=2458;expected_accuracy=0.996       | gnl BL_ORD_ID 23061 | cb124_c8/f2p0/3745        | 216 | 2420 | 1    | 217  | 1540 | 374      | 3    | 217      |

|                                                                                                                                        |                                                                                                                     |      |      |      |      |      |     |      |      |   |
|----------------------------------------------------------------------------------------------------------------------------------------|---------------------------------------------------------------------------------------------------------------------|------|------|------|------|------|-----|------|------|---|
| isoform=cb124_c2;full_length_coverage=4;non_full_length_coverage=0;isoform_length=2458;expected_accuracy=0.998<br>cb3557_c15/f1p0/2674 | isoform=cb124_c8;full_length_coverage=2;non_full_length_coverage=0;isoform_length=3745;expected_accuracy=0.999      |      |      |      |      |      |     |      |      | 5 |
| isoform=cb3557_c15;full_length_coverage=1;non_full_length_coverage=0;isoform_length=2674;expected_accuracy=0.995                       | gnl BL_ORD_ID 70457 cb3557_c31/f1p0/2861                                                                            | 1037 | 2627 | 1    | 1038 | 1297 | 287 | 98   | 1135 | 7 |
| cb8564_c90797/f1p0/2864                                                                                                                | gnl BL_ORD_ID 57186 cb8564_c85953/f1p0/2986                                                                         | 17   | 2307 | 2308 | 2607 | 1    | 229 | 2422 | 271  | 5 |
| cb8564_c19160/f1p2/2687                                                                                                                | gnl BL_ORD_ID 9350      cb8564_c11826/f1p0/2916                                                                     |      |      |      |      |      |     |      |      |   |
| isoform=cb8564_c19160;full_length_coverage=1;non_full_length_coverage=2;isoform_length=2687;expected_accuracy=0.990                    | isoform=cb8564_c11826;full_length_coverage=1;non_full_length_coverage=0;isoform_length=2916;expected_accuracy=0.997 | 1325 | 2687 | 1    | 1326 | 1543 | 290 | 4    | 129  | 8 |
| cb2818_c54/f1p1/2570                                                                                                                   | gnl BL_ORD_ID 68906 cb2818_c57/f1p0/3403                                                                            | 2    | 2144 | 2141 | 2547 | 3    | 214 | 2611 | 301  | 4 |
| cb1913_c44/f1p0/2236                                                                                                                   |                                                                                                                     |      |      |      |      |      |     |      |      |   |
| isoform=cb1913_c44;full_length_coverage=1;non_full_length_coverage=0;isoform_length=2236;expected_accuracy=0.998                       | gnl BL_ORD_ID 66490 cb1913_c46/f1p1/2592                                                                            | 1    | 1634 | 1630 | 2236 | 43   | 167 | 1809 | 241  | 5 |
| cb5583_c0/f4p0/1845                                                                                                                    |                                                                                                                     |      |      |      |      |      |     |      |      |   |
| isoform=cb5583_c0;full_length_coverage=4;non_full_length_coverage=0;isoform_length=1845;expected_accuracy=1.000                        | gnl BL_ORD_ID 74104 cb5583_c3/f1p0/2163                                                                             | 132  | 1845 | 1    | 132  | 422  | 213 | 1    | 132  | 7 |
| cb8564_c37802/f1p0/2973                                                                                                                | gnl BL_ORD_ID 14978      cb8564_c39294/f1p0/3287                                                                    |      |      |      |      |      |     |      |      |   |
|                                                                                                                                        | isoform=cb8564_c39294;full_length_coverage=1;non_full_length_coverage=0;isoform_length=3287;expected_ac             | 1    | 2292 | 2287 | 2777 | 1    | 228 | 2782 | 327  | 6 |



|                                                                                                                     |                                                                                                                     |                         |     |      |      |      |      |      |      |      |  |
|---------------------------------------------------------------------------------------------------------------------|---------------------------------------------------------------------------------------------------------------------|-------------------------|-----|------|------|------|------|------|------|------|--|
| cb965_c18/f1p0/2545                                                                                                 | curacy=0.999<br>gnl BL_ORD_ID 20479                                                                                 | cb965_c42/f1p0/3993     |     |      |      |      |      |      |      |      |  |
| isoform=cb965_c18;full_length_coverage=1;non_full_length_coverage=0;isoform_length=2545;expected_accuracy=1.000     | isoform=cb965_c42;full_length_coverage=1;non_full_length_coverage=0;isoform_length=3993;expected_accuracy=0.998     |                         | 1   | 1828 | 1831 | 2487 | 1274 | 3100 | 3328 | 3993 |  |
| cb2707_c24/f1p0/2640                                                                                                | gnl BL_ORD_ID 36994                                                                                                 | cb2707_c29/f1p1/3207    |     |      |      |      |      |      |      |      |  |
|                                                                                                                     | isoform=cb2707_c29;full_length_coverage=1;non_full_length_coverage=1;isoform_length=3207;expected_accuracy=0.991    |                         | 2   | 2430 | 2425 | 2649 | 1    | 2436 | 2940 | 3164 |  |
| cb8564_c17092/f1p0/3523                                                                                             | gnl BL_ORD_ID 13106                                                                                                 | cb8564_c16615/f1p2/3838 |     |      |      |      |      |      |      |      |  |
|                                                                                                                     | isoform=cb8564_c16615;full_length_coverage=1;non_full_length_coverage=2;isoform_length=3838;expected_accuracy=1.000 |                         | 314 | 3252 | 1    | 314  | 911  | 3837 | 1    | 313  |  |
| cb1685_c9/f1p1/3226                                                                                                 | gnl BL_ORD_ID 31292                                                                                                 | cb1685_c11/f2p1/3604    |     |      |      |      |      |      |      |      |  |
| isoform=cb1685_c9;full_length_coverage=1;non_full_length_coverage=1;isoform_length=3226;expected_accuracy=0.994     | isoform=cb1685_c11;full_length_coverage=2;non_full_length_coverage=1;isoform_length=3604;expected_accuracy=0.995    |                         | 1   | 2295 | 2294 | 3226 | 84   | 2385 | 2644 | 3573 |  |
| cb8637_c58/f1p0/1789                                                                                                | gnl BL_ORD_ID 57461                                                                                                 | cb8637_c31/f1p0/2012    |     |      |      |      |      |      |      |      |  |
| isoform=cb8637_c58;full_length_coverage=1;non_full_length_coverage=0;isoform_length=1789;expected_accuracy=0.990    |                                                                                                                     |                         | 1   | 1332 | 1332 | 1762 | 126  | 1457 | 1560 | 1989 |  |
| cb8564_c91083/f1p0/2192                                                                                             | gnl BL_ORD_ID 18222                                                                                                 | cb8564_c84564/f1p0/2312 |     |      |      |      |      |      |      |      |  |
| isoform=cb8564_c91083;full_length_coverage=1;non_full_length_coverage=0;isoform_length=2192;expected_accuracy=0.997 | isoform=cb8564_c84564;full_length_coverage=1;non_full_length_coverage=0;isoform_length=2312;expected_accuracy=0.991 |                         | 1   | 1532 | 1530 | 2184 | 3    | 1529 | 1629 | 2312 |  |
| cb7128_c3/f1p0/1951                                                                                                 | gnl BL_ORD_ID 4728                                                                                                  | cb7128_c4/f1p0/2477     |     |      |      |      |      |      |      |      |  |
|                                                                                                                     |                                                                                                                     |                         | 427 | 1920 | 62   | 428  | 931  | 242  | 21   | 374  |  |

|                          |                                                                                                                                                                                          |     |      |      |      |      |     |      |     |   |   |
|--------------------------|------------------------------------------------------------------------------------------------------------------------------------------------------------------------------------------|-----|------|------|------|------|-----|------|-----|---|---|
|                          | isoform=cb7128_c4;full_length_coverage=1;non_full_length_coverage=0;isoform_length=2477;expected_accuracy=0.999                                                                          |     |      |      |      |      |     |      | 3   |   |   |
| cb658_c18/flp1/5197      | gnl BL_ORD_ID 4084                      cb658_c10/flp1/6427<br>isoform=cb658_c10;full_length_coverage=1;non_full_length_coverage=1;isoform_length=6427;expected_accuracy=0.993           | 28  | 3899 | 3899 | 5188 | 2    | 386 | 5144 | 642 | 2 |   |
| cb8564_c35806/flp0/2697  | gnl BL_ORD_ID 55939   cb8564_c49630/flp4/3487                                                                                                                                            | 126 | 2454 | 2454 | 2703 | 580  | 291 | 3243 | 349 | 3 |   |
| cb8564_c182028/flp0/2513 | gnl BL_ORD_ID 13686                      cb8564_c23425/flp0/2742<br>isoform=cb8564_c182028;full_length_coverage=1;non_full_length_coverage=0;isoform_length=2513;expected_accuracy=0.996 | 1   | 1971 | 1968 | 2513 | 30   | 199 | 2140 | 266 | 7 | 0 |
| cb8564_c161476/flp4/2801 | gnl BL_ORD_ID 55920   cb8564_c48949/flp0/4357<br>isoform=cb8564_c161476;full_length_coverage=1;non_full_length_coverage=4;isoform_length=2801;expected_accuracy=0.995                    | 16  | 2302 | 2303 | 2801 | 16   | 229 | 2847 | 332 | 3 | 8 |
| cb8564_c94261/flp0/3116  | gnl BL_ORD_ID 13864                      cb8564_c22844/flp2/4014<br>isoform=cb8564_c94261;full_length_coverage=1;non_full_length_coverage=0;isoform_length=3116;expected_accuracy=0.994  | 521 | 3095 | 60   | 522  | 1433 | 401 | 12   | 473 | 2 |   |
| cb8564_c16741/flp0/2997  | gnl BL_ORD_ID 12323                      cb8564_c12737/flp1/3352<br>isoform=cb8564_c12737;full_length_coverage=1;non_full_length_coverage=1;isoform_length=3352;expected_accuracy=0.997  | 375 | 3001 | 71   | 376  | 606  | 322 | 186  | 490 | 7 |   |
| cb4233_c84/flp1/2344     | gnl BL_ORD_ID 72376   cb4233_c129/flp1/2970                                                                                                                                              | 227 | 2372 | 1    | 225  | 520  | 266 | 496  | 720 |   |   |

|                         |                                                                                                                                                                         |      |      |      |      |      |          |      |          |  |
|-------------------------|-------------------------------------------------------------------------------------------------------------------------------------------------------------------------|------|------|------|------|------|----------|------|----------|--|
|                         |                                                                                                                                                                         |      |      |      |      |      |          | 5    |          |  |
| cb8564_c49090/f1p0/3264 | gnl BL_ORD_ID 16149      cb8564_c47162/f1p0/3361<br>isoform=cb8564_c47162;full_length_coverage=1;non_full_length_coverage=0;isoform_length=3361;expected_accuracy=0.996 | 469  | 3242 | 71   | 470  | 592  | 336<br>1 | 3    | 402      |  |
| cb8564_c37802/f1p0/2973 | gnl BL_ORD_ID 15374      cb8564_c43905/f1p0/3073<br>isoform=cb8564_c43905;full_length_coverage=1;non_full_length_coverage=0;isoform_length=3073;expected_accuracy=0.994 | 1    | 2292 | 2287 | 2754 | 1    | 228<br>4 | 2608 | 307<br>3 |  |
| cb8533_c1/f2p0/1399     | gnl BL_ORD_ID 10098      cb8533_c8/f1p0/1587<br>isoform=cb8533_c1;full_length_coverage=2;non_full_length_coverage=0;isoform_length=1399;expected_accuracy=1.000         | 11   | 1112 | 1107 | 1399 | 1    | 1103     | 1251 | 154<br>3 |  |
| cb3031_c0/f1p0/3742     | gnl BL_ORD_ID 36999      cb3031_c1/f1p0/3822<br>isoform=cb3031_c0;full_length_coverage=1;non_full_length_coverage=0;isoform_length=3742;expected_accuracy=0.999         | 165  | 3427 | 3423 | 3742 | 1    | 327<br>5 | 3503 | 382<br>2 |  |
| cb2960_c2/f1p0/2155     | gnl BL_ORD_ID 36641      cb2960_c3/f1p0/2973<br>isoform=cb2960_c2;full_length_coverage=1;non_full_length_coverage=0;isoform_length=2155;expected_accuracy=0.995         | 1    | 1832 | 1831 | 2144 | 41   | 187<br>4 | 2660 | 297<br>3 |  |
| cb7198_c2/f1p0/2361     | gnl BL_ORD_ID 50415      cb7198_c3/f1p0/2567                                                                                                                            | 1049 | 2334 | 1    | 1049 | 1266 | 255<br>0 | 2    | 105<br>0 |  |
| cb12893_c39/f1p0/1097   | gnl BL_ORD_ID 61932      cb12893_c72/f1p0/1628<br>isoform=cb12893_c39;full_length_coverage=1;non_full_length_coverage=0;isoform_length=1097;expected_acc                | 234  | 1079 | 4    | 239  | 490  | 134<br>7 | 1    | 235      |  |



|                                                                                                                     |                                                                                                                       |                           |     |      |      |      |     |     |      |     |
|---------------------------------------------------------------------------------------------------------------------|-----------------------------------------------------------------------------------------------------------------------|---------------------------|-----|------|------|------|-----|-----|------|-----|
| <hr/>                                                                                                               |                                                                                                                       |                           |     |      |      |      |     |     |      |     |
| _accuracy=0.997                                                                                                     |                                                                                                                       |                           |     |      |      |      |     |     |      |     |
| cb12446_c3/f1p0/1412                                                                                                | gnl BL_ORD_ID 12144                                                                                                   | cb8564_c146050/f14p3/2042 |     |      |      |      |     |     |      |     |
| isoform=cb12446_c3;full_length_coverage=1;non_full_length_coverage=0;isoform_length=1412;expected_accuracy=1.000    | isoform=cb8564_c146050;full_length_coverage=14;non_full_length_coverage=3;isoform_length=2042;expected_accuracy=1.000 |                           | 109 | 1411 | 1    | 111  | 738 | 204 | 144  | 253 |
|                                                                                                                     |                                                                                                                       |                           |     |      |      |      |     | 2   |      |     |
| cb8564_c3432/f1p0/2118                                                                                              | gnl BL_ORD_ID 13290                                                                                                   | cb8564_c1937/f1p5/2510    |     |      |      |      |     |     |      |     |
|                                                                                                                     | isoform=cb8564_c1937;full_length_coverage=1;non_full_length_coverage=5;isoform_length=2510;expected_accuracy=0.991    |                           | 619 | 2090 | 8    | 623  | 786 | 225 | 18   | 670 |
|                                                                                                                     |                                                                                                                       |                           |     |      |      |      |     | 7   |      |     |
| cb7749_c11/f1p1/1246                                                                                                | gnl BL_ORD_ID 50686                                                                                                   | cb7749_c7/f1p0/1366       |     |      |      |      |     |     |      |     |
|                                                                                                                     |                                                                                                                       |                           | 169 | 1103 | 4    | 173  | 390 | 132 | 66   | 235 |
|                                                                                                                     |                                                                                                                       |                           |     |      |      |      |     | 3   |      |     |
| cb6569_c6/f1p1/2392                                                                                                 | gnl BL_ORD_ID 47579                                                                                                   | cb6569_c3/f1p1/2683       |     |      |      |      |     |     |      |     |
| isoform=cb6569_c6;full_length_coverage=1;non_full_length_coverage=1;isoform_length=2392;expected_accuracy=0.995     |                                                                                                                       |                           | 1   | 1678 | 1673 | 2324 | 74  | 175 | 1865 | 251 |
|                                                                                                                     |                                                                                                                       |                           |     |      |      |      |     | 3   |      | 6   |
| cb8564_c12355/f1p9/2685                                                                                             | gnl BL_ORD_ID 56353                                                                                                   | cb8564_c75114/f1p0/2866   |     |      |      |      |     |     |      |     |
| isoform=cb8564_c12355;full_length_coverage=1;non_full_length_coverage=9;isoform_length=2685;expected_accuracy=0.999 |                                                                                                                       |                           | 1   | 2062 | 2062 | 2608 | 1   | 203 | 2193 | 273 |
|                                                                                                                     |                                                                                                                       |                           |     |      |      |      |     | 5   |      | 7   |
| cb8564_c43779/f1p0/3021                                                                                             | gnl BL_ORD_ID 55551                                                                                                   | cb8564_c44964/f1p0/3508   |     |      |      |      |     |     |      |     |
| isoform=cb8564_c43779;full_length_coverage=1;non_full_length_coverage=0;isoform_length=3021;expected_accuracy=0.993 |                                                                                                                       |                           | 1   | 2344 | 2345 | 3021 | 1   | 234 | 2497 | 317 |
|                                                                                                                     |                                                                                                                       |                           |     |      |      |      |     | 1   |      | 3   |
| cb7253_c3/f1p0/2607                                                                                                 | gnl BL_ORD_ID 6517                                                                                                    | cb7253_c9/f1p0/2565       |     |      |      |      |     |     |      |     |
|                                                                                                                     | isoform=cb7253_c9;full_length_coverage=1;non_full_length_coverage=0;isoform_length=2565;expected_accuracy=0.993       |                           | 114 | 1801 | 1801 | 2542 | 1   | 169 | 1827 | 256 |
|                                                                                                                     |                                                                                                                       |                           |     |      |      |      |     | 0   |      | 5   |
| <hr/>                                                                                                               |                                                                                                                       |                           |     |      |      |      |     |     |      |     |

|                                                                                                                      |                                                                                                                     |      |      |      |      |      |      |      |      |  |  |
|----------------------------------------------------------------------------------------------------------------------|---------------------------------------------------------------------------------------------------------------------|------|------|------|------|------|------|------|------|--|--|
| cb8564_c38629/f2p1/3246                                                                                              | cy=0.992                                                                                                            |      |      |      |      |      |      |      |      |  |  |
| isoform=cb8564_c38629;full_length_coverage=2;non_full_length_coverage=1;isoform_length=3246;expected_accuracy=0.993  | gnl BL_ORD_ID 55939 cb8564_c49630/f1p4/3487                                                                         | 10   | 2946 | 2946 | 3196 | 6    | 2913 | 3243 | 3493 |  |  |
| cb6159_c9/f1p0/2712                                                                                                  | gnl BL_ORD_ID 46029 cb6159_c13/f4p1/2851                                                                            |      |      |      |      |      |      |      |      |  |  |
| isoform=cb6159_c9;full_length_coverage=1;non_full_length_coverage=0;isoform_length=2712;expected_accuracy=0.994      | isoform=cb6159_c13;full_length_coverage=4;non_full_length_coverage=1;isoform_length=2851;expected_accuracy=0.997    | 1037 | 2641 | 1    | 1037 | 1246 | 2851 | 27   | 1066 |  |  |
| cb11848_c1/f2p0/1107                                                                                                 | gnl BL_ORD_ID 15459 cb8564_c76939/f1p3/2221                                                                         |      |      |      |      |      |      |      |      |  |  |
| isoform=cb11848_c1;full_length_coverage=2;non_full_length_coverage=0;isoform_length=1107;expected_accuracy=0.996     | isoform=cb8564_c76939;full_length_coverage=1;non_full_length_coverage=3;isoform_length=2221;expected_accuracy=0.993 | 474  | 1107 | 5    | 473  | 1288 | 1929 | 1    | 465  |  |  |
| cb541_c26/f1p1/5713                                                                                                  | gnl BL_ORD_ID 73517 cb541_c17/f1p0/6031                                                                             |      |      |      |      |      |      |      |      |  |  |
| isoform=cb541_c26;full_length_coverage=1;non_full_length_coverage=1;isoform_length=5713;expected_accuracy=0.997      |                                                                                                                     | 114  | 5713 | 1    | 111  | 224  | 5814 | 1    | 110  |  |  |
| cb8564_c128725/f1p1/2771                                                                                             | gnl BL_ORD_ID 55391 cb8564_c40278/f3p2/3083                                                                         |      |      |      |      |      |      |      |      |  |  |
| isoform=cb8564_c128725;full_length_coverage=1;non_full_length_coverage=1;isoform_length=2771;expected_accuracy=1.000 |                                                                                                                     | 1    | 2669 | 2664 | 2771 | 1    | 2673 | 2783 | 2891 |  |  |
| cb8564_c47252/f1p0/2795                                                                                              | gnl BL_ORD_ID 56381 cb8564_c75626/f1p2/3199                                                                         |      |      |      |      |      |      |      |      |  |  |
| isoform=cb8564_c47252;full_length_coverage=1;non_full_length_coverage=0;isoform_length=2795;expected_accuracy=0.997  |                                                                                                                     | 1    | 2116 | 2114 | 2701 | 1    | 2116 | 2611 | 3199 |  |  |
| cb4674_c44/f1p2/2925                                                                                                 | gnl BL_ORD_ID 72841 cb4674_c25/f1p0/3544                                                                            |      |      |      |      |      |      |      |      |  |  |
|                                                                                                                      |                                                                                                                     | 1    | 2069 | 2070 | 2906 | 86   | 214  | 2657 | 349  |  |  |

|                                                                                                                                                  |                                                                                                                                                                         |      |      |     |      |      |          |     |          |
|--------------------------------------------------------------------------------------------------------------------------------------------------|-------------------------------------------------------------------------------------------------------------------------------------------------------------------------|------|------|-----|------|------|----------|-----|----------|
| isoform=cb4674_c44;full_length_coverage=1;non_full_length_coverage=2;isoform_length=2925;expected_accuracy=0.991                                 |                                                                                                                                                                         |      |      |     |      |      |          | 1   | 2        |
| cb8564_c42959/f1p0/3330                                                                                                                          | gnl BL_ORD_ID 14333      cb8564_c39696/f4p3/4068<br>isoform=cb8564_c39696;full_length_coverage=4;non_full_length_coverage=3;isoform_length=4068;expected_accuracy=0.997 | 121  | 3198 | 1   | 125  | 986  | 406<br>2 | 169 | 294      |
| cb8564_c185920/f1p0/2777<br>isoform=cb8564_c185920;full_length_coverage=1;non_full_length_coverage=0;isoform_length=2777;expected_accuracy=0.996 | gnl BL_ORD_ID 55464      cb8564_c42285/f1p0/3370                                                                                                                        | 174  | 2777 | 1   | 177  | 351  | 295<br>3 | 15  | 192      |
| cb8564_c49310/f1p2/3045                                                                                                                          | gnl BL_ORD_ID 58199      cb8564_c91279/f1p0/3567                                                                                                                        | 550  | 3004 | 65  | 549  | 749  | 320<br>3 | 24  | 508      |
| cb8564_c14344/f1p0/2533<br>isoform=cb8564_c14344;full_length_coverage=1;non_full_length_coverage=0;isoform_length=2533;expected_accuracy=0.993   | gnl BL_ORD_ID 56712      cb8564_c53711/f1p0/3201                                                                                                                        | 148  | 2533 | 1   | 151  | 508  | 289<br>4 | 39  | 189      |
| cb8794_c14/f1p0/1326                                                                                                                             | gnl BL_ORD_ID 17971      cb8794_c9/f1p0/1826<br>isoform=cb8794_c9;full_length_coverage=1;non_full_length_coverage=0;isoform_length=1826;expected_accuracy=0.998         | 495  | 1177 | 6   | 496  | 1008 | 169<br>1 | 2   | 492      |
| cb14220_c10/f1p1/6717<br>isoform=cb14220_c10;full_length_coverage=1;non_full_length_coverage=1;isoform_length=6717;expected_accuracy=0.993       | gnl BL_ORD_ID 63134      cb14220_c9/f1p0/6925                                                                                                                           | 2469 | 6691 | 185 | 2471 | 2708 | 695<br>0 | 1   | 229<br>3 |
| cb99_c7/f1p0/3479                                                                                                                                | gnl BL_ORD_ID 21971      cb99_c3/f1p1/4977                                                                                                                              | 144  | 3479 | 1   | 146  | 1407 | 475      | 156 | 300      |





|                                                                                                                                                              |                                                                                                                                                                                     |      |      |      |      |      |      |      |      |
|--------------------------------------------------------------------------------------------------------------------------------------------------------------|-------------------------------------------------------------------------------------------------------------------------------------------------------------------------------------|------|------|------|------|------|------|------|------|
| racy=0.994<br>cb8564_c71747/f1p1/2679<br>isoform=cb8564_c71747;full_length_coverage=1;non_full_length_coverage=1;isoform_length=2679;expected_accuracy=0.999 | cy=0.997<br>gnl BL_ORD_ID 15322      cb8564_c34141/f2p2/3036<br>isoform=cb8564_c34141;full_length_coverage=2;non_full_length_coverage=2;isoform_length=3036;expected_accuracy=0.993 | 1    | 1999 | 1998 | 2679 | 88   | 2099 | 2242 | 2921 |
| cb2737_c1/f4p0/2862<br>isoform=cb2737_c1;full_length_coverage=4;non_full_length_coverage=0;isoform_length=2862;expected_accuracy=0.999                       | gnl BL_ORD_ID 36571      cb2737_c54/f1p0/3029<br>isoform=cb2737_c54;full_length_coverage=1;non_full_length_coverage=0;isoform_length=3029;expected_accuracy=0.995                   | 1    | 1942 | 1943 | 2862 | 63   | 1998 | 2110 | 3025 |
| cb666_c2/f1p0/2897<br>isoform=cb666_c2;full_length_coverage=1;non_full_length_coverage=0;isoform_length=2897;expected_accuracy=0.996                         | gnl BL_ORD_ID 47188      cb666_c0/f1p0/4630                                                                                                                                         | 1128 | 2897 | 1    | 1131 | 2803 | 4574 | 449  | 1582 |
| cb7209_c6/f1p0/2322<br>isoform=cb7209_c6;full_length_coverage=1;non_full_length_coverage=0;isoform_length=2322;expected_accuracy=0.999                       | gnl BL_ORD_ID 7147      cb7209_c20/f1p1/2581<br>isoform=cb7209_c20;full_length_coverage=1;non_full_length_coverage=1;isoform_length=2581;expected_accuracy=0.996                    | 1    | 1583 | 1580 | 2322 | 119  | 1702 | 1832 | 2575 |
| cb8564_c11435/f1p1/3407                                                                                                                                      | gnl BL_ORD_ID 12196      cb8564_c12654/f2p0/4122<br>isoform=cb8564_c12654;full_length_coverage=2;non_full_length_coverage=0;isoform_length=4122;expected_accuracy=1.000             | 18   | 1916 | 1916 | 3254 | 4    | 1901 | 2784 | 4122 |
| cb18409_c104/f1p0/1443                                                                                                                                       | gnl BL_ORD_ID 12988      cb8564_c16263/f1p0/2381<br>isoform=cb8564_c16263;full_length_coverage=1;non_full_length_coverage=0;isoform_length=2381;expected_accuracy=0.995             | 110  | 1438 | 1    | 113  | 1051 | 2381 | 24   | 136  |
| cb8564_c43779/f1p0/3021                                                                                                                                      | gnl BL_ORD_ID 55600      cb8564_c46484/f1p0/3151                                                                                                                                    | 101  | 2344 | 2345 | 3021 | 5    | 226  | 2423 | 309  |

|                                                                                                                      |                                                                                                                  |                          |     |      |      |      |      |      |      |      |
|----------------------------------------------------------------------------------------------------------------------|------------------------------------------------------------------------------------------------------------------|--------------------------|-----|------|------|------|------|------|------|------|
| isoform=cb8564_c43779;full_length_coverage=1;non_full_length_coverage=0;isoform_length=3021;expected_accuracy=0.993  |                                                                                                                  |                          |     |      |      |      |      | 7    |      | 7    |
| cb2770_c52/f1p0/2648                                                                                                 | gnl BL_ORD_ID 69963                                                                                              | cb2770_c47/f1p0/3578     | 1   | 1608 | 1608 | 2517 | 72   | 1679 | 2474 | 3398 |
| cb1462_c20/f1p0/3600                                                                                                 | gnl BL_ORD_ID 28514                                                                                              | cb1462_c5/f2p1/3927      |     |      |      |      |      |      |      |      |
| isoform=cb1462_c20;full_length_coverage=1;non_full_length_coverage=0;isoform_length=3600;expected_accuracy=0.995     | isoform=cb1462_c5;full_length_coverage=2;non_full_length_coverage=1;isoform_length=3927;expected_accuracy=0.998  |                          | 167 | 3524 | 1    | 167  | 566  | 3927 | 78   | 244  |
| cb5183_c100/f1p2/1592                                                                                                | gnl BL_ORD_ID 73601                                                                                              | cb5183_c56/f1p0/1814     | 278 | 1519 | 7    | 282  | 402  | 1643 | 1    | 277  |
| isoform=cb5183_c100;full_length_coverage=1;non_full_length_coverage=2;isoform_length=1592;expected_accuracy=0.998    |                                                                                                                  |                          |     |      |      |      |      |      |      |      |
| cb8564_c123951/f1p1/4450                                                                                             | gnl BL_ORD_ID 52889                                                                                              | cb8564_c110962/f2p1/4818 | 310 | 4450 | 1    | 311  | 531  | 4676 | 43   | 374  |
| isoform=cb8564_c123951;full_length_coverage=1;non_full_length_coverage=1;isoform_length=4450;expected_accuracy=0.996 |                                                                                                                  |                          |     |      |      |      |      |      |      |      |
| cb10304_c5/f1p0/1455                                                                                                 | gnl BL_ORD_ID 2574                                                                                               | cb10304_c2/f2p1/1614     |     |      |      |      |      |      |      |      |
| isoform=cb10304_c5;full_length_coverage=1;non_full_length_coverage=0;isoform_length=1455;expected_accuracy=1.000     | isoform=cb10304_c2;full_length_coverage=2;non_full_length_coverage=1;isoform_length=1614;expected_accuracy=1.000 |                          | 11  | 1333 | 1332 | 1455 | 56   | 1377 | 1493 | 1614 |
|                                                                                                                      | gnl BL_ORD_ID 19877                                                                                              | cb8971_c6/f1p2/4360      |     |      |      |      |      |      |      |      |
| cb8971_c24/f1p1/3712                                                                                                 | isoform=cb8971_c6;full_length_coverage=1;non_full_length_coverage=2;isoform_length=4360;expected_accuracy=0.997  |                          | 1   | 2344 | 2341 | 3594 | 1    | 2344 | 3052 | 4303 |
|                                                                                                                      |                                                                                                                  |                          |     |      |      |      |      |      |      |      |
| cb11749_c2/f1p0/1220                                                                                                 | gnl BL_ORD_ID 60349                                                                                              | cb11749_c1/f1p0/3050     | 385 | 1180 | 8    | 390  | 2236 | 303  | 14   | 396  |

|                          |                                                                                                                                                                          |   |      |      |      |     |      |      |      |  |
|--------------------------|--------------------------------------------------------------------------------------------------------------------------------------------------------------------------|---|------|------|------|-----|------|------|------|--|
|                          |                                                                                                                                                                          |   |      |      |      |     |      | 1    |      |  |
| cb8564_c118011/f1p0/1965 | gnl BL_ORD_ID 9341      cb8564_c107041/f1p2/2670<br>isoform=cb8564_c107041;full_length_coverage=1;non_full_length_coverage=2;isoform_length=2670;expected_accuracy=0.994 | 1 | 1321 | 1317 | 1964 | 508 | 1824 | 2003 | 2648 |  |
| cb1415_c16/f1p0/3004     | gnl BL_ORD_ID 61345      cb1415_c11/f1p0/4135<br>isoform=cb1415_c16;full_length_coverage=1;non_full_length_coverage=0;isoform_length=3004;expected_accuracy=0.995        | 1 | 1467 | 1464 | 3004 | 56  | 1525 | 2186 | 3749 |  |
| cb6528_c10/f1p0/2365     | gnl BL_ORD_ID 4353      cb6528_c4/f1p0/2794<br>isoform=cb6528_c4;full_length_coverage=1;non_full_length_coverage=0;isoform_length=2794;expected_accuracy=0.995           | 1 | 1468 | 1465 | 2245 | 9   | 1486 | 1945 | 2729 |  |
| cb5999_c5/f1p0/2393      | gnl BL_ORD_ID 45208      cb5999_c3/f1p0/2890<br>isoform=cb5999_c5;full_length_coverage=1;non_full_length_coverage=0;isoform_length=2393;expected_accuracy=0.996          | 1 | 1224 | 1220 | 2393 | 1   | 1233 | 1670 | 2853 |  |
| cb5001_c11/f1p0/2067     | gnl BL_ORD_ID 73186      cb5001_c6/f1p0/3148                                                                                                                             | 1 | 1585 | 1580 | 2073 | 1   | 1584 | 2360 | 2853 |  |
| cb8564_c80867/f1p8/2842  | gnl BL_ORD_ID 57868      cb8564_c82903/f1p0/3274<br>isoform=cb8564_c80867;full_length_coverage=1;non_full_length_coverage=8;isoform_length=2842;expected_accuracy=0.995  | 1 | 1853 | 1855 | 2761 | 36  | 1887 | 1994 | 2903 |  |
| cb6719_c46/f1p0/2507     | gnl BL_ORD_ID 4663      cb6719_c20/f1p0/3262<br>isoform=cb6719_c20;full_length_coverage=1;non_full_length_coverage=0;isoform_length=3262;expected_accuracy=0.995         | 1 | 1435 | 1434 | 2452 | 684 | 2119 | 2240 | 3257 |  |

|                         |                                                                                                                                                                                                                                                                                                      |     |      |      |      |      |      |      |      |
|-------------------------|------------------------------------------------------------------------------------------------------------------------------------------------------------------------------------------------------------------------------------------------------------------------------------------------------|-----|------|------|------|------|------|------|------|
| cb8564_c3679/f1p0/2936  | acy=0.996<br>gnl BL_ORD_ID 17665                      cb8564_c865/f4p0/2761<br>isoform=cb8564_c865;full_length_coverage=4;non_full_length_coverage=0;isoform_length=2761;expected_accuracy=0.996                                                                                                     | 2   | 2461 | 2460 | 2644 | 17   | 2476 | 2577 | 2761 |
| cb8564_c40764/f1p0/2563 | isoform=cb8564_c40764;full_length_coverage=1;non_full_length_coverage=0;isoform_length=2563;expected_accuracy=0.997<br>gnl BL_ORD_ID 56641   cb8564_c50309/f1p5/3075                                                                                                                                 | 1   | 2167 | 2162 | 2563 | 1    | 2164 | 2371 | 2772 |
| cb1406_c5/f1p0/2334     | gnl BL_ORD_ID 25274                      cb1406_c12/f1p1/5814<br>isoform=cb1406_c5;full_length_coverage=1;non_full_length_coverage=0;isoform_length=2334;expected_accuracy=0.996<br>isoform=cb1406_c12;full_length_coverage=1;non_full_length_coverage=1;isoform_length=5814;expected_accuracy=0.996 | 214 | 2334 | 1    | 218  | 3680 | 5804 | 1    | 218  |
| cb246_c3/f1p3/3304      | gnl BL_ORD_ID 38903                      cb246_c16/f30p3/3550<br>isoform=cb246_c3;full_length_coverage=1;non_full_length_coverage=3;isoform_length=3304;expected_accuracy=0.997<br>isoform=cb246_c16;full_length_coverage=30;non_full_length_coverage=3;isoform_length=3550;expected_accuracy=1.000  | 1   | 2715 | 2712 | 3303 | 70   | 2786 | 2957 | 3550 |
| cb293_c1/f1p0/4190      | isoform=cb293_c1;full_length_coverage=1;non_full_length_coverage=0;isoform_length=4190;expected_accuracy=0.999<br>gnl BL_ORD_ID 69536   cb293_c7/f1p0/4528                                                                                                                                           | 1   | 2211 | 2208 | 4190 | 20   | 2232 | 2409 | 4370 |
| cb581_c7/f1p0/2369      | gnl BL_ORD_ID 45254                      cb581_c1/f2p1/2803<br>isoform=cb581_c7;full_length_coverage=1;non_full_length_coverage=0;isoform_length=2369;expected_accuracy=0.990<br>isoform=cb581_c1;full_length_coverage=2;non_full_length_coverage=1;isoform_length=2803;expected_accuracy=1.000      | 1   | 1631 | 1627 | 2369 | 326  | 1956 | 2061 | 2799 |
| cb8564_c5117/f1p0/4873  | gnl BL_ORD_ID 29247                      cb14859_c9/f1p3/5221                                                                                                                                                                                                                                        | 722 | 4873 | 82   | 723  | 998  | 515  | 1    | 641  |

|                                                                                                                    |                                                                                                                                                                           |      |      |      |      |      |      |      |      |   |
|--------------------------------------------------------------------------------------------------------------------|---------------------------------------------------------------------------------------------------------------------------------------------------------------------------|------|------|------|------|------|------|------|------|---|
| isoform=cb8564_c5117;full_length_coverage=1;non_full_length_coverage=0;isoform_length=4873;expected_accuracy=0.999 | isoform=cb14859_c9;full_length_coverage=1;non_full_length_coverage=3;isoform_length=5221;expected_accuracy=0.997                                                          |      |      |      |      |      |      |      |      | 0 |
| cb8564_c2150/f1p0/2358                                                                                             | gnl BL_ORD_ID 11337      cb8564_c123109/f2p0/3168<br>isoform=cb8564_c123109;full_length_coverage=2;non_full_length_coverage=0;isoform_length=3168;expected_accuracy=0.998 | 12   | 2130 | 2130 | 2332 | 685  | 2806 | 2934 | 3136 |   |
| cb8564_c34638/f1p0/2817                                                                                            | gnl BL_ORD_ID 14407      cb8564_c44036/f1p0/3258<br>isoform=cb8564_c44036;full_length_coverage=1;non_full_length_coverage=0;isoform_length=3258;expected_accuracy=0.992   | 1146 | 2813 | 1    | 1146 | 1575 | 3258 | 1    | 1147 |   |
| cb8564_c41756/f1p0/2738                                                                                            | gnl BL_ORD_ID 10510      cb8564_c111713/f6p2/3032<br>isoform=cb8564_c111713;full_length_coverage=6;non_full_length_coverage=2;isoform_length=3032;expected_accuracy=0.998 | 1    | 2173 | 2170 | 2738 | 1    | 2148 | 2271 | 2838 |   |
| cb9199_c16/f1p0/1711                                                                                               | gnl BL_ORD_ID 20905      cb9199_c13/f1p0/2081<br>isoform=cb9199_c13;full_length_coverage=1;non_full_length_coverage=0;isoform_length=2081;expected_accuracy=0.995         | 157  | 1711 | 1    | 156  | 496  | 2051 | 138  | 293  |   |
| cb15493_c2/f1p0/1044                                                                                               | gnl BL_ORD_ID 15750      cb8564_c69252/f2p1/3018<br>isoform=cb8564_c69252;full_length_coverage=2;non_full_length_coverage=1;isoform_length=3018;expected_accuracy=0.998   | 305  | 1003 | 6    | 307  | 2319 | 3018 | 1    | 306  |   |
| cb2785_c20/f1p2/2883                                                                                               | gnl BL_ORD_ID 36581      cb2785_c9/f1p1/3811<br>isoform=cb2785_c9;full_length_coverage=1;non_full_length_coverage=1;isoform_length=3811;expected_accuracy=0.998           | 1    | 2058 | 2060 | 2803 | 101  | 2156 | 3065 | 3806 |   |

|                         |                                                                                                                                                                                 |     |      |      |      |      |      |      |      |  |
|-------------------------|---------------------------------------------------------------------------------------------------------------------------------------------------------------------------------|-----|------|------|------|------|------|------|------|--|
| racy=0.997              | cy=0.995                                                                                                                                                                        |     |      |      |      |      |      |      |      |  |
| cb9604_c7/flp0/1887     | gnl BL_ORD_ID 20879                      cb9604_c0/f3p0/1972<br>isoform=cb9604_c0;full_length_coverage=3;non_full_length_coverage=0;isoform_length=1972;expected_accuracy=0.997 | 202 | 1802 | 27   | 200  | 321  | 1920 | 1    | 176  |  |
| cb8564_c19794/flp0/2446 | gnl BL_ORD_ID 57737   cb8564_c79357/flp0/2727<br>isoform=cb8564_c19794;full_length_coverage=1;non_full_length_coverage=0;isoform_length=2446;expected_accuracy=0.994            | 189 | 2444 | 1    | 188  | 434  | 2688 | 15   | 202  |  |
| cb3618_c26/flp0/2964    | gnl BL_ORD_ID 71384   cb3618_c17/flp0/3242                                                                                                                                      | 2   | 2434 | 2434 | 2849 | 17   | 2443 | 2801 | 3217 |  |
| cb8564_c44698/flp5/2843 | gnl BL_ORD_ID 56623   cb8564_c49310/flp2/3045<br>isoform=cb8564_c44698;full_length_coverage=1;non_full_length_coverage=5;isoform_length=2843;expected_accuracy=0.997            | 18  | 2516 | 2511 | 2834 | 65   | 2559 | 2680 | 3005 |  |
| cb4651_c1/flp0/3282     | gnl BL_ORD_ID 72812   cb4651_c3/flp0/4374                                                                                                                                       | 21  | 2348 | 2347 | 3292 | 15   | 2342 | 3089 | 4034 |  |
| cb3471_c3/flp1/1814     | gnl BL_ORD_ID 70396   cb3471_c0/flp0/3611<br>isoform=cb3471_c3;full_length_coverage=1;non_full_length_coverage=1;isoform_length=1814;expected_accuracy=0.996                    | 1   | 1009 | 1007 | 1783 | 1    | 1044 | 2775 | 3563 |  |
| cb944_c92/flp0/1128     | gnl BL_ORD_ID 59112   cb944_c83/flp0/1294                                                                                                                                       | 8   | 693  | 688  | 1139 | 11   | 697  | 799  | 1250 |  |
| cb1821_c16/flp1/3514    | gnl BL_ORD_ID 63996   cb1821_c15/flp0/3876                                                                                                                                      | 655 | 3314 | 77   | 655  | 1142 | 3792 | 2    | 579  |  |
| cb7725_c2/flp1/2358     | gnl BL_ORD_ID 8968                      cb7725_c0/flp1/2549                                                                                                                     | 216 | 2358 | 1    | 217  | 368  | 250  | 51   | 267  |  |

|                                                                                                                                             |                                                                                                                                                                     |     |      |      |      |     |     |      |     |   |
|---------------------------------------------------------------------------------------------------------------------------------------------|---------------------------------------------------------------------------------------------------------------------------------------------------------------------|-----|------|------|------|-----|-----|------|-----|---|
| isoform=cb7725_c2;full_length_coverage=1;non_full_length_coverage=1;isoform_length=2358;expected_accuracy=0.992<br>cb8564_c69489/f1p0/1983  | isoform=cb7725_c0;full_length_coverage=1;non_full_length_coverage=1;isoform_length=2549;expected_accuracy=0.996<br>gnl BL_ORD_ID 19270      cb8564_c79478/f1p0/2124 |     |      |      |      |     |     |      |     | 8 |
| isoform=cb8564_c69489;full_length_coverage=1;non_full_length_coverage=0;isoform_length=1983;expected_accuracy=0.994                         | isoform=cb8564_c79478;full_length_coverage=1;non_full_length_coverage=0;isoform_length=2124;expected_accuracy=0.994<br>gnl BL_ORD_ID 40922      cb3485_c4/f1p0/3162 | 173 | 1983 | 11   | 175  | 314 | 212 | 1    | 165 | 4 |
| cb3485_c10/f1p0/2515                                                                                                                        | isoform=cb3485_c4;full_length_coverage=1;non_full_length_coverage=0;isoform_length=3162;expected_accuracy=0.996                                                     | 1   | 1299 | 1298 | 2523 | 77  | 137 | 1809 | 303 | 5 |
| cb8564_c38947/f1p0/2650                                                                                                                     | gnl BL_ORD_ID 61972      cb12931_c30/f1p0/5903                                                                                                                      | 1   | 1441 | 1436 | 2650 | 1   | 143 | 1654 | 286 | 7 |
| isoform=cb8564_c38947;full_length_coverage=1;non_full_length_coverage=0;isoform_length=2650;expected_accuracy=0.996<br>cb5699_c30/f4p1/2374 | gnl BL_ORD_ID 46122      cb5699_c5/f1p0/3030                                                                                                                        |     |      |      |      |     |     |      |     |   |
| isoform=cb5699_c30;full_length_coverage=4;non_full_length_coverage=1;isoform_length=2374;expected_accuracy=1.000                            | isoform=cb5699_c5;full_length_coverage=1;non_full_length_coverage=0;isoform_length=3030;expected_accuracy=0.995                                                     | 225 | 2365 | 1    | 226  | 889 | 303 | 1    | 229 | 0 |
| cb3981_c17/f1p0/2982                                                                                                                        | gnl BL_ORD_ID 71698      cb3981_c11/f1p0/3288                                                                                                                       | 495 | 2937 | 5    | 496  | 759 | 320 | 1    | 495 | 1 |
| cb8564_c90231/f1p1/3635                                                                                                                     | gnl BL_ORD_ID 12196      cb8564_c12654/f2p0/4122                                                                                                                    |     |      |      |      |     |     |      |     |   |
| isoform=cb8564_c12654;full_length_coverage=2;non_full_length_coverage=0;isoform_length=4122;expected_accuracy=1.000                         | isoform=cb8564_c12654;full_length_coverage=2;non_full_length_coverage=0;isoform_length=4122;expected_accuracy=1.000                                                 | 1   | 1904 | 1904 | 3242 | 1   | 190 | 2784 | 412 | 1 |
| cb8564_c44420/f1p0/2853                                                                                                                     | gnl BL_ORD_ID 15357      cb8564_c44284/f4p1/3133                                                                                                                    | 1   | 1487 | 1484 | 2831 | 97  | 157 | 1793 | 313 |   |

|                                                                                                                                             |                                                                                                                                                                                           |     |      |      |      |     |      |      |      |   |
|---------------------------------------------------------------------------------------------------------------------------------------------|-------------------------------------------------------------------------------------------------------------------------------------------------------------------------------------------|-----|------|------|------|-----|------|------|------|---|
| isoform=cb8564_c44420;full_length_coverage=1;non_full_length_coverage=0;isoform_length=2853;expected_accuracy=0.992<br>cb4042_c14/f1p0/3138 | isoform=cb8564_c44284;full_length_coverage=4;non_full_length_coverage=1;isoform_length=3133;expected_accuracy=1.000<br>gnl BL_ORD_ID 39856                      cb4042_c10/f1p0/3274      |     |      |      |      |     |      | 5    |      | 3 |
| isoform=cb4042_c14;full_length_coverage=1;non_full_length_coverage=0;isoform_length=3138;expected_accuracy=0.993<br>cb964_c15/f1p0/4325     | isoform=cb4042_c10;full_length_coverage=1;non_full_length_coverage=0;isoform_length=3274;expected_accuracy=0.992<br>gnl BL_ORD_ID 59142   cb964_c19/f1p0/4670                             | 1   | 2786 | 2786 | 3076 | 14  | 2795 | 2986 | 3274 |   |
| cb8564_c21052/f1p2/3145                                                                                                                     | gnl BL_ORD_ID 13276                      cb8564_c23062/f1p3/3805<br>isoform=cb8564_c23062;full_length_coverage=1;non_full_length_coverage=3;isoform_length=3805;expected_accuracy=0.995   | 1   | 2341 | 2342 | 4110 | 81  | 2421 | 2626 | 4394 |   |
| cb8564_c84198/f1p0/2418                                                                                                                     | gnl BL_ORD_ID 12430                      cb8564_c147762/f1p5/2779<br>isoform=cb8564_c147762;full_length_coverage=1;non_full_length_coverage=5;isoform_length=2779;expected_accuracy=0.995 | 244 | 3057 | 13   | 249  | 925 | 3742 | 1    | 229  |   |
| cb8564_c41076/f2p1/3193                                                                                                                     | gnl BL_ORD_ID 14238                      cb8564_c39248/f1p1/3575<br>isoform=cb8564_c39248;full_length_coverage=1;non_full_length_coverage=1;isoform_length=3575;expected_accuracy=0.993   | 1   | 2008 | 2006 | 2428 | 83  | 2094 | 2211 | 2632 |   |
| cb8564_c75534/f1p0/3028                                                                                                                     | gnl BL_ORD_ID 14238                      cb8564_c39248/f1p1/3575<br>isoform=cb8564_c39248;full_length_coverage=1;non_full_length_coverage=1;isoform_length=3575;expected_accuracy=0.993   | 1   | 2413 | 2409 | 3128 | 1   | 2419 | 2856 | 3574 |   |
| isoform=cb8564_c75534;full_length_coverage=1;non_full_length_coverage=0;isoform_length=3028;expected_accuracy=0.994<br>cb7642_c36/f1p0/2490 | gnl BL_ORD_ID 56483   cb8564_c77669/f1p0/3318                                                                                                                                             | 1   | 1798 | 1797 | 2897 | 35  | 1825 | 2128 | 3225 |   |
|                                                                                                                                             | gnl BL_ORD_ID 51431   cb7642_c72/f1p0/3432                                                                                                                                                | 1   | 1677 | 1676 | 2490 | 137 | 181  | 2029 | 284  |   |



|                                                                                                                     |                                                                                                                     |                         |      |      |      |      |      |      |      |      |
|---------------------------------------------------------------------------------------------------------------------|---------------------------------------------------------------------------------------------------------------------|-------------------------|------|------|------|------|------|------|------|------|
| isoform=cb7642_c36;full_length_coverage=1;non_full_length_coverage=0;isoform_length=2490;expected_accuracy=0.991    |                                                                                                                     |                         |      |      |      |      |      | 3    |      | 5    |
| cb12047_c134/f1p0/1727                                                                                              |                                                                                                                     |                         |      |      |      |      |      |      |      |      |
| isoform=cb12047_c134;full_length_coverage=1;non_full_length_coverage=0;isoform_length=1727;expected_accuracy=0.999  | gnl BL_ORD_ID 60511                                                                                                 | cb12047_c47/f1p7/1851   | 1    | 1006 | 1001 | 1711 | 1    | 1006 | 1112 | 1822 |
| cb1262_c13/f1p0/3920                                                                                                | gnl BL_ORD_ID 23602                                                                                                 | cb1262_c27/f1p1/4094    |      |      |      |      |      |      |      |      |
| isoform=cb1262_c13;full_length_coverage=1;non_full_length_coverage=0;isoform_length=3920;expected_accuracy=0.996    | isoform=cb1262_c27;full_length_coverage=1;non_full_length_coverage=1;isoform_length=4094;expected_accuracy=0.996    |                         | 352  | 3920 | 133  | 353  | 529  | 4094 | 1    | 224  |
| cb6802_c57/f1p0/2631                                                                                                | gnl BL_ORD_ID 50084                                                                                                 | cb6802_c52/f1p0/2612    | 191  | 2236 | 1    | 192  | 293  | 238  | 1    | 168  |
| cb6346_c2/f1p0/2403                                                                                                 | gnl BL_ORD_ID 4866                                                                                                  | cb6346_c3/f1p0/2550     |      |      |      |      |      |      |      |      |
| isoform=cb6346_c2;full_length_coverage=1;non_full_length_coverage=0;isoform_length=2403;expected_accuracy=0.993     | isoform=cb6346_c3;full_length_coverage=1;non_full_length_coverage=0;isoform_length=2550;expected_accuracy=0.996     |                         | 1138 | 2403 | 10   | 1142 | 1243 | 257  | 1    | 1130 |
| cb452_c42/f1p0/3142                                                                                                 | gnl BL_ORD_ID 70914                                                                                                 | cb452_c29/f1p1/3123     | 1296 | 2981 | 1    | 1297 | 1405 | 3091 | 1    | 1302 |
| cb8564_c71747/f1p1/2679                                                                                             | gnl BL_ORD_ID 16786                                                                                                 | cb8564_c52175/f1p3/3008 |      |      |      |      |      |      |      |      |
| isoform=cb8564_c71747;full_length_coverage=1;non_full_length_coverage=1;isoform_length=2679;expected_accuracy=0.999 | isoform=cb8564_c52175;full_length_coverage=1;non_full_length_coverage=3;isoform_length=3008;expected_accuracy=0.999 |                         | 1    | 2002 | 1998 | 2679 | 25   | 2094 | 2236 | 2917 |
| cb8564_c38947/f1p0/2650                                                                                             | gnl BL_ORD_ID 14263                                                                                                 | cb8564_c42654/f1p1/2906 |      |      |      |      |      |      |      |      |
| isoform=cb8564_c38947;full_length_coverage=1;non_full_length_coverage=0;isoform_length=2650;expected_accuracy=0.999 | isoform=cb8564_c42654;full_length_coverage=1;non_full_length_coverage=1;isoform_length=2906;expected_accuracy=0.999 |                         | 1    | 1441 | 1436 | 2626 | 1    | 1414 | 1631 | 2824 |

|                          |                                                                                                                                                                         |     |      |      |      |      |      |      |      |  |  |
|--------------------------|-------------------------------------------------------------------------------------------------------------------------------------------------------------------------|-----|------|------|------|------|------|------|------|--|--|
| accuracy=0.996           | curacy=0.990                                                                                                                                                            |     |      |      |      |      |      |      |      |  |  |
| cb8564_c113599/f1p0/2144 | gnl BL_ORD_ID 16225      cb8564_c76305/f1p0/2353<br>isoform=cb8564_c76305;full_length_coverage=1;non_full_length_coverage=0;isoform_length=2353;expected_accuracy=1.000 | 1   | 1347 | 1346 | 2125 | 39   | 1384 | 1551 | 2331 |  |  |
| cb3143_c11/f1p1/3005     | gnl BL_ORD_ID 69160 cb3143_c4/f1p0/3643<br>isoform=cb3143_c11;full_length_coverage=1;non_full_length_coverage=1;isoform_length=3005;expected_accuracy=0.997             | 294 | 3005 | 14   | 294  | 687  | 3402 | 1    | 284  |  |  |
| cb8097_c6/f1p0/2610      | gnl BL_ORD_ID 50861 cb8097_c4/f1p0/3641<br>isoform=cb8097_c6;full_length_coverage=1;non_full_length_coverage=0;isoform_length=2610;expected_accuracy=0.998              | 1   | 2175 | 2175 | 2608 | 100  | 2278 | 3227 | 3662 |  |  |
| cb8564_c38251/f1p0/3243  | gnl BL_ORD_ID 55920 cb8564_c48949/f1p0/4357                                                                                                                             | 1   | 2309 | 2310 | 2973 | 2    | 2293 | 2847 | 3507 |  |  |
| cb6606_c20/f1p0/2268     | gnl BL_ORD_ID 49866 cb6606_c12/f1p0/2893                                                                                                                                | 1   | 1174 | 1173 | 2229 | 24   | 1193 | 1855 | 2900 |  |  |
| cb6548_c16/f1p0/2550     | gnl BL_ORD_ID 5637      cb6548_c10/f1p1/2515<br>isoform=cb6548_c10;full_length_coverage=1;non_full_length_coverage=1;isoform_length=2515;expected_accuracy=0.991        | 272 | 2430 | 73   | 273  | 345  | 2515 | 1    | 209  |  |  |
| cb9061_c56/f10p1/2114    | gnl BL_ORD_ID 58527 cb9061_c19/f1p0/2376<br>isoform=cb9061_c56;full_length_coverage=10;non_full_length_coverage=1;isoform_length=2114;expected_accuracy=1.000           | 1   | 1472 | 1473 | 2114 | 2    | 1473 | 1581 | 2226 |  |  |
| cb1001_c9/f1p0/3094      | gnl BL_ORD_ID 2951      cb1001_c2/f1p0/3812                                                                                                                             | 257 | 3023 | 1    | 257  | 1036 | 381  | 639  | 893  |  |  |

|                                                                                                                     |                                                                                                                      |      |      |      |      |      |      |      |      |  |
|---------------------------------------------------------------------------------------------------------------------|----------------------------------------------------------------------------------------------------------------------|------|------|------|------|------|------|------|------|--|
|                                                                                                                     | isoform=cb1001_c2;full_length_coverage=1;non_full_length_coverage=0;isoform_length=3812;expected_accuracy=0.995      |      |      |      |      |      |      | 2    |      |  |
| cb1953_c8/f1p0/2581                                                                                                 | gnl BL_ORD_ID 35584      cb1953_c6/f1p0/3949                                                                         |      |      |      |      |      |      |      |      |  |
| isoform=cb1953_c8;full_length_coverage=1;non_full_length_coverage=0;isoform_length=2581;expected_accuracy=0.993     | isoform=cb1953_c6;full_length_coverage=1;non_full_length_coverage=0;isoform_length=3949;expected_accuracy=0.999      | 1    | 1516 | 1515 | 2558 | 612  | 2127 | 2903 | 3949 |  |
| cb8564_c21439/f1p0/2587                                                                                             | gnl BL_ORD_ID 16052      cb8564_c69457/f3p14/2821                                                                    |      |      |      |      |      |      |      |      |  |
|                                                                                                                     | isoform=cb8564_c69457;full_length_coverage=3;non_full_length_coverage=14;isoform_length=2821;expected_accuracy=0.997 | 1226 | 2572 | 1    | 1228 | 1349 | 2695 | 1    | 1228 |  |
| cb18456_c7297/f1p0/1408                                                                                             | gnl BL_ORD_ID 54626      cb8564_c128456/f1p0/2321                                                                    |      |      |      |      |      |      |      |      |  |
|                                                                                                                     | isoform=cb18456_c7297;full_length_coverage=1;non_full_length_coverage=0;isoform_length=1408;expected_accuracy=0.993  | 520  | 1324 | 7    | 519  | 1434 | 2238 | 1    | 514  |  |
| cb3087_c39/f1p0/3065                                                                                                | gnl BL_ORD_ID 37719      cb3087_c29/f1p1/3127                                                                        |      |      |      |      |      |      |      |      |  |
|                                                                                                                     | isoform=cb3087_c29;full_length_coverage=1;non_full_length_coverage=1;isoform_length=3127;expected_accuracy=0.993     | 1    | 2059 | 2054 | 2496 | 1    | 2061 | 2613 | 3054 |  |
| cb8564_c17237/f1p1/2698                                                                                             | gnl BL_ORD_ID 54208      cb8564_c20515/f1p0/3776                                                                     |      |      |      |      |      |      |      |      |  |
| isoform=cb8564_c17237;full_length_coverage=1;non_full_length_coverage=1;isoform_length=2698;expected_accuracy=0.999 | isoform=cb8564_c20515;full_length_coverage=1;non_full_length_coverage=1;isoform_length=3776;expected_accuracy=0.999  | 2    | 2449 | 2445 | 2698 | 1    | 2445 | 3325 | 3578 |  |
| cb8564_c11511/f2p0/2718                                                                                             | gnl BL_ORD_ID 57148      cb8564_c84620/f1p0/3289                                                                     |      |      |      |      |      |      |      |      |  |
| isoform=cb8564_c11511;full_length_coverage=2;non_full_length_coverage=0;isoform_length=2718;expected_accuracy=0.992 | isoform=cb8564_c84620;full_length_coverage=1;non_full_length_coverage=0;isoform_length=3289;expected_accuracy=0.992  | 195  | 2715 | 1    | 194  | 528  | 3054 | 10   | 197  |  |
| cb8564_c132288/f2p0/3421                                                                                            | gnl BL_ORD_ID 16467      cb8564_c49872/f2p1/3689                                                                     |      |      |      |      |      |      |      |      |  |
|                                                                                                                     | isoform=cb8564_c132288;full_length_coverage=1;non_full_length_coverage=0;isoform_length=3421;expected_accuracy=0.993 | 1    | 1918 | 1918 | 3408 | 137  | 203  | 2209 | 368  |  |

|                                                                                                                      |                                                                                                                      |     |      |      |      |      |      |      |      |
|----------------------------------------------------------------------------------------------------------------------|----------------------------------------------------------------------------------------------------------------------|-----|------|------|------|------|------|------|------|
| isoform=cb8564_c132288;full_length_coverage=2;non_full_length_coverage=0;isoform_length=3421;expected_accuracy=0.996 | isoform=cb8564_c49872;full_length_coverage=2;non_full_length_coverage=1;isoform_length=3689;expected_accuracy=1.000  |     |      |      |      |      |      | 1    | 9    |
| cb7007_c7/f1p0/2328                                                                                                  | gnl BL_ORD_ID 47801 cb7007_c13/f1p0/2402                                                                             | 656 | 2330 | 93   | 657  | 713  | 2387 | 1    | 565  |
| cb341_c7/f1p0/2819                                                                                                   | gnl BL_ORD_ID 40575 cb341_c21/f1p0/3212                                                                              |     |      |      |      |      |      |      |      |
| isoform=cb341_c7;full_length_coverage=1;non_full_length_coverage=0;isoform_length=2819;expected_accuracy=1.000       | isoform=cb341_c21;full_length_coverage=1;non_full_length_coverage=0;isoform_length=3212;expected_accuracy=0.991      | 16  | 2507 | 2507 | 2723 | 1    | 2506 | 2993 | 3212 |
| cb8564_c4697/f8p0/2707                                                                                               | gnl BL_ORD_ID 11448 cb8564_c124301/f1p0/2778                                                                         |     |      |      |      |      |      |      |      |
| isoform=cb8564_c4697;full_length_coverage=8;non_full_length_coverage=0;isoform_length=2707;expected_accuracy=1.000   | isoform=cb8564_c124301;full_length_coverage=1;non_full_length_coverage=0;isoform_length=2778;expected_accuracy=0.997 | 313 | 2644 | 75   | 317  | 449  | 2778 | 1    | 244  |
| cb1468_c0/f7p1/2932                                                                                                  | gnl BL_ORD_ID 63645 cb1468_c3/f1p0/4312                                                                              |     |      |      |      |      |      |      |      |
| isoform=cb1468_c0;full_length_coverage=7;non_full_length_coverage=1;isoform_length=2932;expected_accuracy=1.000      |                                                                                                                      | 1   | 2062 | 2061 | 2864 | 94   | 2140 | 3043 | 3855 |
| cb1279_c62/f1p0/2083                                                                                                 | gnl BL_ORD_ID 61188 cb1279_c66/f1p1/3600                                                                             |     |      |      |      |      |      |      |      |
| isoform=cb1279_c62;full_length_coverage=1;non_full_length_coverage=0;isoform_length=2083;expected_accuracy=1.000     |                                                                                                                      | 177 | 2116 | 1    | 177  | 1485 | 3425 | 4    | 180  |
| cb8564_c44063/f1p0/2503                                                                                              | gnl BL_ORD_ID 55785 cb8564_c36643/f1p3/2668                                                                          |     |      |      |      |      |      |      |      |
| isoform=cb8564_c44063;full_length_coverage=1;non_full_length_coverage=0;isoform_length=2503;expected_accuracy=0.999  |                                                                                                                      | 397 | 2503 | 5    | 402  | 536  | 2641 | 13   | 411  |
| cb1317_c16/f1p1/2428                                                                                                 | gnl BL_ORD_ID 27409 cb1317_c11/f1p1/4136                                                                             |     |      |      |      |      |      |      |      |
| isoform=cb1317_c16;full_length_coverage=1;non_full_length_coverage=0;isoform_length=2428;expected_accuracy=1.000     | isoform=cb1317_c11;full_length_coverage=1;non_full_length_coverage=1;isoform_length=4136;expected_accuracy=1.000     | 229 | 2361 | 1    | 228  | 1953 | 4080 | 4    | 228  |



|                                                                                                                     |                                                                                                                      |                          |     |      |      |      |     |      |      |      |  |  |
|---------------------------------------------------------------------------------------------------------------------|----------------------------------------------------------------------------------------------------------------------|--------------------------|-----|------|------|------|-----|------|------|------|--|--|
| cb9467_c49/flp1/2123                                                                                                | cy=0.999<br>gnl BL_ORD_ID 21842                                                                                      | cb9467_c46/flp0/2279     |     |      |      |      |     |      |      |      |  |  |
| isoform=cb9467_c49;full_length_coverage=1;non_full_length_coverage=1;isoform_length=2123;expected_accuracy=0.993    | isoform=cb9467_c46;full_length_coverage=1;non_full_length_coverage=0;isoform_length=2279;expected_accuracy=0.992     |                          | 1   | 1610 | 1608 | 2034 | 4   | 1609 | 1855 | 2279 |  |  |
| cb8564_c36689/flp1/2368                                                                                             | gnl BL_ORD_ID 55866                                                                                                  | cb8564_c47522/flp0/2954  |     |      |      |      |     |      |      |      |  |  |
| isoform=cb8564_c36689;full_length_coverage=1;non_full_length_coverage=1;isoform_length=2368;expected_accuracy=0.991 |                                                                                                                      |                          | 1   | 1709 | 1706 | 2368 | 1   | 1682 | 2181 | 2845 |  |  |
| cb8102_c19/flp0/1683                                                                                                | gnl BL_ORD_ID 7932                                                                                                   | cb8102_c8/flp3/1987      |     |      |      |      |     |      |      |      |  |  |
| isoform=cb8102_c19;full_length_coverage=1;non_full_length_coverage=0;isoform_length=1683;expected_accuracy=0.991    | isoform=cb8102_c8;full_length_coverage=1;non_full_length_coverage=3;isoform_length=1987;expected_accuracy=1.000      |                          | 1   | 1128 | 1124 | 1683 | 23  | 1150 | 1329 | 1889 |  |  |
| cb8564_c10952/flp1/2673                                                                                             | gnl BL_ORD_ID 56353                                                                                                  | cb8564_c75114/flp0/2866  |     |      |      |      |     |      |      |      |  |  |
| isoform=cb8564_c10952;full_length_coverage=1;non_full_length_coverage=1;isoform_length=2673;expected_accuracy=0.992 |                                                                                                                      |                          | 2   | 2041 | 2039 | 2594 | 1   | 2035 | 2193 | 2737 |  |  |
| cb8564_c81734/flp1/2771                                                                                             | gnl BL_ORD_ID 56381                                                                                                  | cb8564_c75626/flp2/3199  |     |      |      |      |     |      |      |      |  |  |
| isoform=cb8564_c81734;full_length_coverage=1;non_full_length_coverage=1;isoform_length=2771;expected_accuracy=0.995 |                                                                                                                      |                          | 121 | 2234 | 2232 | 2771 | 1   | 2116 | 2611 | 3149 |  |  |
| cb17137_c7/flp1/1834                                                                                                | gnl BL_ORD_ID 12667                                                                                                  | cb8564_c127556/flp2/2131 |     |      |      |      |     |      |      |      |  |  |
|                                                                                                                     | isoform=cb8564_c127556;full_length_coverage=1;non_full_length_coverage=2;isoform_length=2131;expected_accuracy=0.999 |                          | 1   | 1291 | 1287 | 1691 | 1   | 1292 | 1663 | 2067 |  |  |
| cb10931_c3/flp0/1364                                                                                                | gnl BL_ORD_ID 1042                                                                                                   | cb10931_c5/flp0/1833     |     |      |      |      |     |      |      |      |  |  |
|                                                                                                                     |                                                                                                                      |                          | 532 | 1364 | 6    | 531  | 975 | 180  | 1    | 516  |  |  |



|                                                                                                                     |                                                                                                                      |      |      |      |      |      |     |      |      |   |
|---------------------------------------------------------------------------------------------------------------------|----------------------------------------------------------------------------------------------------------------------|------|------|------|------|------|-----|------|------|---|
| cb8564_c48661/f1p2/2634                                                                                             | gnl BL_ORD_ID 11343      cb8564_c148508/f1p3/2825                                                                    |      |      |      |      |      |     | 8    |      |   |
| isoform=cb8564_c48661;full_length_coverage=1;non_full_length_coverage=2;isoform_length=2634;expected_accuracy=0.998 | isoform=cb8564_c148508;full_length_coverage=1;non_full_length_coverage=3;isoform_length=2825;expected_accuracy=0.994 | 396  | 2631 | 8    | 399  | 539  | 277 | 40   | 433  |   |
| cb8564_c54387/f1p0/4415                                                                                             | gnl BL_ORD_ID 16467      cb8564_c49872/f2p1/3689                                                                     |      |      |      |      |      |     |      |      |   |
| isoform=cb8564_c54387;full_length_coverage=1;non_full_length_coverage=1;isoform_length=3689;expected_accuracy=1.000 | isoform=cb8564_c49872;full_length_coverage=2;non_full_length_coverage=1;isoform_length=3689;expected_accuracy=1.000  | 2    | 2011 | 2011 | 3492 | 27   | 203 | 2209 | 368  | 9 |
| cb8564_c19221/f2p0/2424                                                                                             | gnl BL_ORD_ID 54080      cb8564_c18027/f1p0/3948                                                                     |      |      |      |      |      |     |      |      |   |
| isoform=cb8564_c19221;full_length_coverage=2;non_full_length_coverage=0;isoform_length=2424;expected_accuracy=0.995 | isoform=cb8564_c18027;full_length_coverage=1;non_full_length_coverage=0;isoform_length=3948;expected_accuracy=0.995  | 390  | 2423 | 50   | 389  | 1755 | 378 | 4    | 343  |   |
| cb8564_c76252/f1p1/3205                                                                                             | gnl BL_ORD_ID 57993      cb8564_c86203/f1p0/3428                                                                     |      |      |      |      |      |     |      |      |   |
| isoform=cb8564_c76252;full_length_coverage=1;non_full_length_coverage=1;isoform_length=3205;expected_accuracy=1.000 | isoform=cb8564_c86203;full_length_coverage=1;non_full_length_coverage=1;isoform_length=3428;expected_accuracy=1.000  | 1052 | 3205 | 1    | 1053 | 1267 | 340 | 60   | 1112 |   |
| cb9358_c9/f1p0/1857                                                                                                 | gnl BL_ORD_ID 19548      cb9358_c4/f1p0/2124                                                                         |      |      |      |      |      |     |      |      |   |
| isoform=cb9358_c9;full_length_coverage=1;non_full_length_coverage=0;isoform_length=1857;expected_accuracy=1.000     | isoform=cb9358_c4;full_length_coverage=1;non_full_length_coverage=0;isoform_length=2124;expected_accuracy=1.000      | 155  | 1857 | 1    | 156  | 420  | 212 | 37   | 191  |   |
| cb1163_c21/f1p5/3705                                                                                                | gnl BL_ORD_ID 23462      cb1163_c14/f1p1/4695                                                                        |      |      |      |      |      |     |      |      |   |
| isoform=cb1163_c21;full_length_coverage=1;non_full_length_coverage=5;isoform_length=3705;expected_accuracy=0.994    | isoform=cb1163_c14;full_length_coverage=1;non_full_length_coverage=1;isoform_length=4695;expected_accuracy=0.991     | 1    | 1957 | 1956 | 3625 | 2    | 195 | 3030 | 469  | 5 |
| cb8564_c80845/f1p0/3015                                                                                             | gnl BL_ORD_ID 11236      cb8564_c145778/f9p1/3503                                                                    |      |      |      |      |      |     |      |      |   |
| isoform=cb8564_c80845;full_length_coverage=1;non_full_length_coverage=1;isoform_length=3015;expected_accuracy=1.000 | isoform=cb8564_c145778;full_length_coverage=1;non_full_length_coverage=1;isoform_length=3503;expected_accuracy=1.000 | 1    | 1675 | 1676 | 3015 | 13   | 169 | 2143 | 348  |   |



|                                                                                                                                                  |                                                                                                                                                                         |     |      |      |      |      |      |      |      |
|--------------------------------------------------------------------------------------------------------------------------------------------------|-------------------------------------------------------------------------------------------------------------------------------------------------------------------------|-----|------|------|------|------|------|------|------|
| isoform=cb8564_c80845;full_length_coverage=1;non_full_length_coverage=0;isoform_length=3015;expected_accuracy=0.993                              | isoform=cb8564_c145778;full_length_coverage=9;non_full_length_coverage=1;isoform_length=3503;expected_accuracy=1.000                                                    |     |      |      |      |      | 2    |      | 5    |
| cb8564_c35645/f1p0/2804                                                                                                                          | gnl BL_ORD_ID 18962      cb8564_c79723/f1p6/3025<br>isoform=cb8564_c79723;full_length_coverage=1;non_full_length_coverage=6;isoform_length=3025;expected_accuracy=0.999 | 150 | 2694 | 1    | 151  | 481  | 3025 | 218  | 368  |
| cb5048_c7/f1p1/1621<br>isoform=cb5048_c7;full_length_coverage=1;non_full_length_coverage=1;isoform_length=1621;expected_accuracy=0.990           | gnl BL_ORD_ID 72095      cb5048_c6/f1p0/2038                                                                                                                            | 1   | 1263 | 1263 | 1541 | 1    | 1265 | 1706 | 1984 |
| cb8564_c4092/f1p0/3913                                                                                                                           | gnl BL_ORD_ID 54976      cb8564_c4091/f1p0/3908                                                                                                                         | 251 | 3517 | 1    | 253  | 461  | 3727 | 2    | 255  |
| cb5633_c34/f1p3/2503<br>isoform=cb5633_c34;full_length_coverage=1;non_full_length_coverage=3;isoform_length=2503;expected_accuracy=0.996         | gnl BL_ORD_ID 74193      cb5633_c36/f1p3/2709                                                                                                                           | 332 | 2503 | 38   | 335  | 464  | 2639 | 1    | 295  |
| cb8564_c180679/f1p0/2109<br>isoform=cb8564_c180679;full_length_coverage=1;non_full_length_coverage=0;isoform_length=2109;expected_accuracy=0.999 | gnl BL_ORD_ID 14025      cb8564_c31262/f7p4/2729<br>isoform=cb8564_c31262;full_length_coverage=7;non_full_length_coverage=4;isoform_length=2729;expected_accuracy=0.994 | 198 | 2109 | 1    | 202  | 718  | 2631 | 139  | 340  |
| cb2527_c19/f1p0/2292<br>isoform=cb2527_c19;full_length_coverage=1;non_full_length_coverage=0;isoform_length=2292;expected_accuracy=0.997         | gnl BL_ORD_ID 38908      cb2527_c48/f10p2/3282<br>isoform=cb2527_c48;full_length_coverage=10;non_full_length_coverage=2;isoform_length=3282;expected_accuracy=0.997     | 132 | 2291 | 1    | 136  | 1088 | 3248 | 26   | 154  |
| cb8564_c181853/f1p0/2119                                                                                                                         | gnl BL_ORD_ID 15428      cb8564_c42387/f1p4/2973                                                                                                                        | 1   | 1339 | 1334 | 2109 | 1    | 134  | 2173 | 297  |

|                                                                                                                                          |                                                                                                                                                                    |     |      |      |      |     |     |      |     |
|------------------------------------------------------------------------------------------------------------------------------------------|--------------------------------------------------------------------------------------------------------------------------------------------------------------------|-----|------|------|------|-----|-----|------|-----|
| isoform=cb8564_c181853;full_length_coverage=1;non_full_length_coverage=0;isoform_length=2119;expected_accuracy=0.997                     | isoform=cb8564_c42387;full_length_coverage=1;non_full_length_coverage=4;isoform_length=2973;expected_accuracy=0.993                                                |     |      |      |      |     | 4   |      | 3   |
| cb8564_c111594/f1p0/3002                                                                                                                 | gnl BL_ORD_ID 53251 cb8564_c119935/f1p0/3487                                                                                                                       | 108 | 2897 | 1    | 109  | 726 | 351 | 26   | 134 |
| cb8564_c35300/f1p2/3912                                                                                                                  | gnl BL_ORD_ID 16776 cb8564_c53806/f1p3/3974<br>isoform=cb8564_c53806;full_length_coverage=1;non_full_length_coverage=3;isoform_length=3974;expected_accuracy=0.990 | 185 | 3827 | 16   | 186  | 313 | 397 | 1    | 173 |
| cb124_c43/f1p0/2759                                                                                                                      | gnl BL_ORD_ID 23058 cb124_c6/f3p0/2872<br>isoform=cb124_c6;full_length_coverage=3;non_full_length_coverage=0;isoform_length=2872;expected_accuracy=1.000           | 233 | 2491 | 13   | 233  | 614 | 287 | 39   | 259 |
| cb12714_c29/f1p2/1583                                                                                                                    | gnl BL_ORD_ID 54044 cb8564_c17331/f1p0/3185                                                                                                                        | 1   | 1296 | 1293 | 1543 | 35  | 133 | 2398 | 264 |
| cb3229_c12/f1p0/2616                                                                                                                     | gnl BL_ORD_ID 39750 cb3229_c0/f3p0/2667<br>isoform=cb3229_c0;full_length_coverage=3;non_full_length_coverage=0;isoform_length=2667;expected_accuracy=0.998         | 444 | 2412 | 45   | 448  | 572 | 254 | 1    | 409 |
| cb8881_c18/f1p0/1628<br>isoform=cb8881_c18;full_length_coverage=1;non_full_length_coverage=0;isoform_length=1628;expected_accuracy=0.997 | gnl BL_ORD_ID 20988 cb8881_c0/f8p0/2063<br>isoform=cb8881_c0;full_length_coverage=8;non_full_length_coverage=0;isoform_length=2063;expected_accuracy=1.000         | 1   | 1226 | 1225 | 1628 | 13  | 123 | 1646 | 204 |
| cb8564_c12792/f1p0/3267<br>isoform=cb8564_c12792;full_length_coverage=1;non_full_length_coverage=0;isoform_length=3267;expected_         | gnl BL_ORD_ID 12663 cb8564_c14856/f1p0/3558<br>isoform=cb8564_c14856;full_length_coverage=1;non_full_length_coverage=0;isoform_length=3558;expected_ac             | 2   | 2932 | 2930 | 3265 | 1   | 293 | 3224 | 355 |
|                                                                                                                                          |                                                                                                                                                                    |     |      |      |      |     | 2   |      | 8   |

|                                                                                                                                                                    |                                                                                                                                                                                           |     |      |      |      |     |          |      |          |
|--------------------------------------------------------------------------------------------------------------------------------------------------------------------|-------------------------------------------------------------------------------------------------------------------------------------------------------------------------------------------|-----|------|------|------|-----|----------|------|----------|
| accuracy=0.996<br>cb8564_c185920/f1p0/2777<br>isoform=cb8564_c185920;full_length_coverage=1;non_full_length_coverage=0;isoform_length=2777;expected_accuracy=0.996 | accuracy=0.991<br>gnl BL_ORD_ID 14529      cb8564_c44074/f1p1/2922<br>isoform=cb8564_c44074;full_length_coverage=1;non_full_length_coverage=1;isoform_length=2922;expected_accuracy=0.994 | 174 | 2777 | 1    | 177  | 346 | 292<br>2 | 14   | 190      |
| cb3170_c3/f1p1/2075<br>isoform=cb3170_c3;full_length_coverage=1;non_full_length_coverage=1;isoform_length=2075;expected_accuracy=0.996                             | gnl BL_ORD_ID 38754      cb3170_c5/f1p2/2463<br>isoform=cb3170_c5;full_length_coverage=1;non_full_length_coverage=2;isoform_length=2463;expected_accuracy=0.997                           | 1   | 1519 | 1518 | 2075 | 191 | 171<br>3 | 1816 | 237<br>3 |
| cb8564_c123988/f1p0/2683                                                                                                                                           | gnl BL_ORD_ID 53109      cb8564_c116513/f1p1/2958                                                                                                                                         | 1   | 2343 | 2344 | 2556 | 142 | 248<br>4 | 2656 | 286<br>8 |
| cb500_c49/f1p0/3666                                                                                                                                                | gnl BL_ORD_ID 72251      cb500_c68/f1p0/4152                                                                                                                                              | 284 | 3332 | 11   | 288  | 961 | 403<br>4 | 34   | 301      |
| cb4190_c0/f2p1/2052<br>isoform=cb4190_c0;full_length_coverage=2;non_full_length_coverage=1;isoform_length=2052;expected_accuracy=0.998                             | gnl BL_ORD_ID 43320      cb4190_c1/f1p0/3409<br>isoform=cb4190_c1;full_length_coverage=1;non_full_length_coverage=0;isoform_length=3409;expected_accuracy=0.999                           | 1   | 1338 | 1335 | 2052 | 42  | 138<br>3 | 2688 | 340<br>6 |
| cb7639_c15/f1p0/2203<br>isoform=cb7639_c15;full_length_coverage=1;non_full_length_coverage=0;isoform_length=2203;expected_accuracy=0.998                           | gnl BL_ORD_ID 51428      cb7639_c14/f1p0/2787                                                                                                                                             | 1   | 1804 | 1803 | 2203 | 37  | 183<br>4 | 2114 | 254<br>1 |
| cb4269_c10/f1p0/1931<br>isoform=cb4269_c10;full_length_coverage=1;non_full_length_coverage=0;isoform_length=1931;expected_accuracy=0.997                           | gnl BL_ORD_ID 43058      cb4269_c11/f2p0/2147<br>isoform=cb4269_c11;full_length_coverage=2;non_full_length_coverage=0;isoform_length=2147;expected_accuracy=0.997                         | 129 | 1931 | 1    | 130  | 340 | 214<br>2 | 105  | 225      |
| cb8564_c146667/f2p0/2543                                                                                                                                           | gnl BL_ORD_ID 10739      cb8564_c120058/f5p2/2713                                                                                                                                         | 1   | 2247 | 2243 | 2498 | 2   | 225      | 2458 | 271      |

|                                                                                                                                             |                                                                                                                      |     |      |      |      |      |      |      |      |
|---------------------------------------------------------------------------------------------------------------------------------------------|----------------------------------------------------------------------------------------------------------------------|-----|------|------|------|------|------|------|------|
| isoform=cb8564_c146667;full_length_coverage=2;non_full_length_coverage=0;isoform_length=2543;expected_accuracy=1.000<br>cb2601_c2/f2p0/2981 | isoform=cb8564_c120058;full_length_coverage=5;non_full_length_coverage=2;isoform_length=2713;expected_accuracy=0.996 |     |      |      |      |      | 3    |      | 3    |
| isoform=cb2601_c2;full_length_coverage=2;non_full_length_coverage=0;isoform_length=2981;expected_accuracy=0.999<br>cb6636_c4/f1p0/1118      | gnl BL_ORD_ID 68634 cb2601_c3/f1p0/3863                                                                              | 1   | 1831 | 1832 | 2981 | 1    | 1833 | 2369 | 3520 |
| isoform=cb6636_c4;full_length_coverage=1;non_full_length_coverage=0;isoform_length=1118;expected_accuracy=0.994                             | gnl BL_ORD_ID 49909 cb6636_c3/f1p0/1512                                                                              | 126 | 1118 | 2    | 129  | 453  | 1445 | 27   | 153  |
| cb8564_c86536/f1p0/2772                                                                                                                     | gnl BL_ORD_ID 10590 cb8564_c107836/f2p0/3713                                                                         |     |      |      |      |      |      |      |      |
| isoform=cb8564_c86536;full_length_coverage=1;non_full_length_coverage=0;isoform_length=2772;expected_accuracy=0.997                         | isoform=cb8564_c107836;full_length_coverage=2;non_full_length_coverage=0;isoform_length=3713;expected_accuracy=0.996 | 109 | 2772 | 1    | 112  | 227  | 2899 | 1    | 108  |
| cb8564_c75566/f1p0/2337                                                                                                                     | gnl BL_ORD_ID 18567 cb8564_c88386/f1p0/3550                                                                          |     |      |      |      |      |      |      |      |
| isoform=cb8564_c75566;full_length_coverage=1;non_full_length_coverage=0;isoform_length=2337;expected_accuracy=0.994                         | isoform=cb8564_c88386;full_length_coverage=1;non_full_length_coverage=0;isoform_length=3550;expected_accuracy=1.000  | 1   | 1176 | 1171 | 2337 | 7    | 1182 | 2382 | 3545 |
| cb12513_c19/f1p3/1447                                                                                                                       | gnl BL_ORD_ID 14254 cb8564_c3885/f1p7/2735                                                                           |     |      |      |      |      |      |      |      |
|                                                                                                                                             | isoform=cb8564_c3885;full_length_coverage=1;non_full_length_coverage=7;isoform_length=2735;expected_accuracy=0.999   | 269 | 1414 | 3    | 270  | 1490 | 2630 | 7    | 274  |
| cb6633_c10/f1p0/1980                                                                                                                        | gnl BL_ORD_ID 3747 cb6633_c9/f1p0/2805                                                                               |     |      |      |      |      |      |      |      |
| isoform=cb6633_c10;full_length_coverage=1;non_full_length_coverage=0;isoform_length=1980;expected_accuracy=0.999                            | isoform=cb6633_c9;full_length_coverage=1;non_full_length_coverage=0;isoform_length=2805;expected_accuracy=0.999      | 1   | 1409 | 1406 | 1948 | 110  | 1518 | 2261 | 2805 |

|                         |                                                                                                                                                                          |     |      |      |      |      |          |      |          |  |  |
|-------------------------|--------------------------------------------------------------------------------------------------------------------------------------------------------------------------|-----|------|------|------|------|----------|------|----------|--|--|
| racy=0.999              | cy=0.997                                                                                                                                                                 |     |      |      |      |      |          |      |          |  |  |
| cb7088_c9/f1p0/2325     | gnl BL_ORD_ID 4800      cb7088_c10/f1p0/2704<br>isoform=cb7088_c10;full_length_coverage=1;non_full_length_coverage=0;isoform_length=2704;expected_accuracy=0.994         | 180 | 2342 | 1    | 179  | 470  | 263<br>4 | 81   | 265      |  |  |
| cb8564_c78476/f1p0/3130 | gnl BL_ORD_ID 9280      cb8564_c107656/f6p3/3035<br>isoform=cb8564_c107656;full_length_coverage=6;non_full_length_coverage=3;isoform_length=3035;expected_accuracy=0.999 | 11  | 1640 | 1639 | 2539 | 12   | 163<br>3 | 1998 | 289<br>3 |  |  |
| cb2238_c51/f18p0/2624   | gnl BL_ORD_ID 68369      cb2238_c21/f1p0/3677<br>isoform=cb2238_c51;full_length_coverage=18;non_full_length_coverage=0;isoform_length=2624;expected_accuracy=1.000       | 138 | 2604 | 1    | 139  | 797  | 326<br>3 | 5    | 145      |  |  |
| cb1333_c10/f4p0/1937    | gnl BL_ORD_ID 61259      cb1333_c109/f1p0/5379<br>isoform=cb1333_c10;full_length_coverage=4;non_full_length_coverage=0;isoform_length=1937;expected_accuracy=1.000       | 143 | 1936 | 13   | 142  | 3138 | 493<br>1 | 17   | 146      |  |  |
| cb309_c4/f2p2/4112      | gnl BL_ORD_ID 69547      cb309_c21/f1p0/4520<br>isoform=cb309_c4;full_length_coverage=2;non_full_length_coverage=2;isoform_length=4112;expected_accuracy=0.996           | 1   | 3715 | 3716 | 4108 | 22   | 371<br>9 | 4007 | 440<br>0 |  |  |
| cb4487_c26/f1p0/1475    | gnl BL_ORD_ID 72601      cb4487_c19/f1p1/1740<br>isoform=cb4487_c26;full_length_coverage=1;non_full_length_coverage=0;isoform_length=1475;expected_accuracy=0.998        | 417 | 1475 | 46   | 420  | 576  | 163<br>4 | 1    | 376      |  |  |
| cb454_c24/f1p0/2537     | gnl BL_ORD_ID 70924      cb454_c27/f1p0/2557                                                                                                                             | 225 | 2275 | 1    | 224  | 335  | 238      | 6    | 229      |  |  |

|                                                                                                                     |                                                                                                                     |      |      |      |      |      |      |      |      |  |
|---------------------------------------------------------------------------------------------------------------------|---------------------------------------------------------------------------------------------------------------------|------|------|------|------|------|------|------|------|--|
| cb9664_c0/f1p0/2005                                                                                                 |                                                                                                                     |      |      |      |      |      |      | 6    |      |  |
| isoform=cb9664_c0;full_length_coverage=1;non_full_length_coverage=0;isoform_length=2005;expected_accuracy=0.996     | gnl BL_ORD_ID 58841 cb9664_c2/f1p0/2566                                                                             | 1    | 1087 | 1086 | 2004 | 3    | 1092 | 1642 | 2559 |  |
| cb2927_c1/f2p1/2815                                                                                                 | gnl BL_ORD_ID 38415 cb2927_c2/f2p0/3116                                                                             |      |      |      |      |      |      |      |      |  |
| isoform=cb2927_c1;full_length_coverage=2;non_full_length_coverage=1;isoform_length=2815;expected_accuracy=0.994     | isoform=cb2927_c2;full_length_coverage=2;non_full_length_coverage=0;isoform_length=3116;expected_accuracy=0.995     | 1    | 1879 | 1878 | 2815 | 16   | 1900 | 2172 | 3109 |  |
| cb309_c4/f2p2/4112                                                                                                  |                                                                                                                     |      |      |      |      |      |      |      |      |  |
| isoform=cb309_c4;full_length_coverage=2;non_full_length_coverage=2;isoform_length=4112;expected_accuracy=0.996      | gnl BL_ORD_ID 69546 cb309_c5/f1p0/4669                                                                              | 1    | 3715 | 3716 | 4096 | 206  | 3917 | 4205 | 4585 |  |
| cb8564_c90610/f1p0/2901                                                                                             | gnl BL_ORD_ID 56373 cb8564_c75497/f1p0/3111                                                                         | 1087 | 2722 | 1    | 1087 | 1185 | 2821 | 226  | 1312 |  |
| cb8564_c40598/f1p4/3119                                                                                             | gnl BL_ORD_ID 15152 cb8564_c38629/f2p1/3246                                                                         |      |      |      |      |      |      |      |      |  |
| isoform=cb8564_c38629;full_length_coverage=2;non_full_length_coverage=1;isoform_length=3246;expected_accuracy=0.993 | isoform=cb8564_c40598;full_length_coverage=2;non_full_length_coverage=1;isoform_length=3119;expected_accuracy=0.993 | 1    | 2732 | 2729 | 3055 | 1    | 2761 | 2882 | 3208 |  |
| cb7940_c54/f1p1/1719                                                                                                |                                                                                                                     |      |      |      |      |      |      |      |      |  |
| isoform=cb7940_c54;full_length_coverage=1;non_full_length_coverage=1;isoform_length=1719;expected_accuracy=0.997    | gnl BL_ORD_ID 51643 cb7940_c42/f1p0/2040                                                                            | 1    | 1366 | 1363 | 1704 | 58   | 1423 | 1619 | 1962 |  |
| cb1291_c9/f1p1/2168                                                                                                 |                                                                                                                     |      |      |      |      |      |      |      |      |  |
| isoform=cb1291_c9;full_length_coverage=1;non_full_length_coverage=1;isoform_length=2168;expected_accuracy=0.997     | gnl BL_ORD_ID 61199 cb1291_c14/f1p0/2892                                                                            | 183  | 2168 | 1    | 182  | 545  | 2531 | 2    | 184  |  |

|                         |                                                                                                                                                                         |   |      |      |      |     |      |      |      |  |
|-------------------------|-------------------------------------------------------------------------------------------------------------------------------------------------------------------------|---|------|------|------|-----|------|------|------|--|
| acy=0.993               |                                                                                                                                                                         |   |      |      |      |     |      |      |      |  |
| cb8564_c38462/f1p0/3241 | gnl BL_ORD_ID 17429      cb8564_c85447/f1p0/3196<br>isoform=cb8564_c85447;full_length_coverage=1;non_full_length_coverage=0;isoform_length=3196;expected_accuracy=0.997 | 1 | 2410 | 2409 | 2946 | 3   | 2413 | 2660 | 3194 |  |
| cb12931_c15/f1p0/1493   | gnl BL_ORD_ID 55213      cb8564_c35568/f1p0/2997<br>isoform=cb12931_c15;full_length_coverage=1;non_full_length_coverage=0;isoform_length=1493;expected_accuracy=1.000   | 1 | 1106 | 1104 | 1493 | 13  | 1123 | 2503 | 2890 |  |
| cb1326_c9/f1p0/3549     | gnl BL_ORD_ID 25268      cb1326_c13/f1p1/4140<br>isoform=cb1326_c9;full_length_coverage=1;non_full_length_coverage=0;isoform_length=3549;expected_accuracy=0.996        | 1 | 3198 | 3194 | 3508 | 298 | 3493 | 3805 | 4137 |  |
| cb8564_c81778/f1p0/3178 | gnl BL_ORD_ID 55135      cb8564_c25151/f1p2/3689                                                                                                                        | 2 | 2698 | 2694 | 2918 | 1   | 2692 | 3295 | 3519 |  |
| cb8564_c87490/f1p0/2768 | gnl BL_ORD_ID 18365      cb8564_c81851/f2p0/3845<br>isoform=cb8564_c81851;full_length_coverage=2;non_full_length_coverage=0;isoform_length=3845;expected_accuracy=0.997 | 1 | 1736 | 1735 | 2772 | 4   | 1742 | 2688 | 3725 |  |
| cb16925_c1/f1p0/1736    | gnl BL_ORD_ID 53594      cb8564_c129578/f1p0/2063<br>isoform=cb16925_c1;full_length_coverage=1;non_full_length_coverage=0;isoform_length=1736;expected_accuracy=0.999   | 1 | 1127 | 1124 | 1712 | 1   | 1135 | 1490 | 2078 |  |
| cb8564_c36689/f1p1/2368 | gnl BL_ORD_ID 15602      cb8564_c50271/f1p1/2688<br>isoform=cb8564_c36689;full_length_coverage=1;non_full_length_coverage=1;isoform_length=2368;expected_               | 1 | 1709 | 1706 | 2368 | 1   | 1704 | 2022 | 2688 |  |

|                                                                                                                                                            |                                                                                                                                                                                   |     |      |      |      |      |      |      |      |
|------------------------------------------------------------------------------------------------------------------------------------------------------------|-----------------------------------------------------------------------------------------------------------------------------------------------------------------------------------|-----|------|------|------|------|------|------|------|
| accuracy=0.991<br>cb17349_c3/f2p0/1249<br>isoform=cb17349_c3;full_length_coverage=2;non_full_length_coverage=0;isoform_length=1249;expected_accuracy=0.993 | curacy=0.994<br>gnl BL_ORD_ID 32156      cb17349_c2/f2p0/1517<br>isoform=cb17349_c2;full_length_coverage=2;non_full_length_coverage=0;isoform_length=1517;expected_accuracy=1.000 | 9   | 681  | 677  | 1239 | 1    | 671  | 899  | 1459 |
| cb8564_c109747/f3p1/2083<br>isoform=cb8564_c109747;full_length_coverage=3;non_full_length_coverage=1;isoform_length=2083;expected_accuracy=0.998           | gnl BL_ORD_ID 15976      cb8564_c53159/f1p0/2602<br>isoform=cb8564_c53159;full_length_coverage=1;non_full_length_coverage=0;isoform_length=2602;expected_accuracy=0.994           | 1   | 1051 | 1050 | 2023 | 1    | 1053 | 1471 | 2442 |
| cb4370_c5/f1p0/2518<br>isoform=cb4370_c5;full_length_coverage=1;non_full_length_coverage=0;isoform_length=2518;expected_accuracy=0.998                     | gnl BL_ORD_ID 72511      cb4370_c3/f1p0/3357                                                                                                                                      | 329 | 2482 | 33   | 330  | 1186 | 3339 | 1    | 298  |
| cb12362_c44/f1p1/1106                                                                                                                                      | gnl BL_ORD_ID 1903      cb10045_c31/f1p0/1199<br>isoform=cb10045_c31;full_length_coverage=1;non_full_length_coverage=0;isoform_length=1199;expected_accuracy=0.994                | 117 | 1058 | 2    | 118  | 258  | 1199 | 1    | 116  |
| cb8564_c35356/f1p0/2738<br>isoform=cb8564_c35356;full_length_coverage=1;non_full_length_coverage=0;isoform_length=2738;expected_accuracy=0.994             | gnl BL_ORD_ID 15169      cb8564_c40218/f1p0/3146<br>isoform=cb8564_c40218;full_length_coverage=1;non_full_length_coverage=0;isoform_length=3146;expected_accuracy=0.993           | 1   | 2071 | 2070 | 2737 | 4    | 2065 | 2486 | 3146 |
| cb5359_c41/f1p0/1175                                                                                                                                       | gnl BL_ORD_ID 44627      cb5359_c37/f13p1/2486<br>isoform=cb5359_c37;full_length_coverage=13;non_full_length_coverage=1;isoform_length=2486;expected_accuracy=0.996               | 124 | 1164 | 3    | 126  | 1432 | 2471 | 73   | 194  |
| cb8564_c20575/f1p0/3783                                                                                                                                    | gnl BL_ORD_ID 53995      cb8564_c16613/f1p1/4260                                                                                                                                  | 1   | 2046 | 2044 | 3781 | 1    | 204  | 2473 | 421  |



|                                                                                                                      |                                                                                                                      |                          |      |      |      |      |      |      |      |      |
|----------------------------------------------------------------------------------------------------------------------|----------------------------------------------------------------------------------------------------------------------|--------------------------|------|------|------|------|------|------|------|------|
| isoform=cb8564_c20575;full_length_coverage=1;non_full_length_coverage=0;isoform_length=3783;expected_accuracy=0.997  |                                                                                                                      |                          |      |      |      |      |      | 6    | 0    |      |
| cb8564_c185920/f1p0/2777                                                                                             | gnl BL_ORD_ID 12938                                                                                                  | cb8564_c181163/f1p1/2936 |      |      |      |      |      |      |      |      |
| isoform=cb8564_c185920;full_length_coverage=1;non_full_length_coverage=0;isoform_length=2777;expected_accuracy=0.996 | isoform=cb8564_c181163;full_length_coverage=1;non_full_length_coverage=1;isoform_length=2936;expected_accuracy=0.993 |                          | 174  | 2777 | 1    | 177  | 352  | 2936 | 19   | 195  |
| cb2513_c28/f1p0/2811                                                                                                 | gnl BL_ORD_ID 36412                                                                                                  | cb18837_c1/f1p0/5324     |      |      |      |      |      |      |      |      |
| isoform=cb2513_c28;full_length_coverage=1;non_full_length_coverage=0;isoform_length=2811;expected_accuracy=0.995     | isoform=cb18837_c1;full_length_coverage=1;non_full_length_coverage=0;isoform_length=5324;expected_accuracy=0.998     |                          | 679  | 2811 | 97   | 681  | 3137 | 5277 | 22   | 601  |
| cb8564_c48192/f1p6/3029                                                                                              | gnl BL_ORD_ID 14531                                                                                                  | cb8564_c41778/f1p9/3482  |      |      |      |      |      |      |      |      |
|                                                                                                                      | isoform=cb8564_c41778;full_length_coverage=1;non_full_length_coverage=9;isoform_length=3482;expected_accuracy=0.992  |                          | 245  | 2874 | 1    | 249  | 812  | 3442 | 1    | 247  |
| cb388_c33/f1p0/3488                                                                                                  | gnl BL_ORD_ID 69589                                                                                                  | cb388_c34/f1p0/3652      |      |      |      |      |      |      |      |      |
|                                                                                                                      |                                                                                                                      |                          | 20   | 2859 | 2859 | 3293 | 43   | 2896 | 3039 | 3470 |
| cb8564_c76575/f2p0/3760                                                                                              | gnl BL_ORD_ID 15880                                                                                                  | cb8564_c69166/f2p0/4243  |      |      |      |      |      |      |      |      |
| isoform=cb8564_c76575;full_length_coverage=2;non_full_length_coverage=0;isoform_length=3760;expected_accuracy=1.000  | isoform=cb8564_c69166;full_length_coverage=2;non_full_length_coverage=0;isoform_length=4243;expected_accuracy=0.997  |                          | 1462 | 3722 | 1    | 1463 | 1986 | 4243 | 12   | 1471 |
| cb900_c13/f1p0/2723                                                                                                  | gnl BL_ORD_ID 57606                                                                                                  | cb900_c8/f1p0/3263       |      |      |      |      |      |      |      |      |
|                                                                                                                      |                                                                                                                      |                          | 1    | 1986 | 1981 | 2445 | 35   | 2020 | 2665 | 3130 |
| cb18456_c6530/f1p0/1200                                                                                              | gnl BL_ORD_ID 34789                                                                                                  | cb18456_c3977/f1p2/1752  |      |      |      |      |      |      |      |      |
|                                                                                                                      | isoform=cb18456_c3977;full_length_coverage=1;non_full_length_coverage=2;isoform_length=1752;expected_ac              |                          | 260  | 1156 | 4    | 259  | 794  | 1682 | 9    | 262  |

|                                                                                                                                                |                                                                                                                                                                      |     |      |      |      |     |          |      |          |  |
|------------------------------------------------------------------------------------------------------------------------------------------------|----------------------------------------------------------------------------------------------------------------------------------------------------------------------|-----|------|------|------|-----|----------|------|----------|--|
|                                                                                                                                                | curacy=0.992                                                                                                                                                         |     |      |      |      |     |          |      |          |  |
| cb3644_c20/f1p0/3151                                                                                                                           | gnl BL_ORD_ID 71404 cb3644_c9/f1p0/3316                                                                                                                              | 1   | 1893 | 1894 | 3105 | 5   | 189<br>7 | 2030 | 324<br>1 |  |
| cb7969_c11/f1p0/1950<br>isoform=cb7969_c11;full_length_coverage=1;non_full_length_coverage=0;isoform_length=1950;expected_accuracy=0.992       | gnl BL_ORD_ID 8012 cb7969_c33/f4p1/2302<br>isoform=cb7969_c33;full_length_coverage=4;non_full_length_coverage=1;isoform_length=2302;expected_accuracy=0.997          | 1   | 1409 | 1405 | 1950 | 73  | 148<br>3 | 1728 | 229<br>5 |  |
| cb8564_c70156/f1p0/2250<br>isoform=cb8564_c70156;full_length_coverage=1;non_full_length_coverage=0;isoform_length=2250;expected_accuracy=0.996 | gnl BL_ORD_ID 12057 cb8564_c145727/f5p1/2610<br>isoform=cb8564_c145727;full_length_coverage=5;non_full_length_coverage=1;isoform_length=2610;expected_accuracy=1.000 | 108 | 2247 | 1    | 110  | 471 | 260<br>7 | 51   | 160      |  |
| cb8564_c15653/f1p4/2475                                                                                                                        | gnl BL_ORD_ID 52845 cb8564_c15530/f1p0/3247                                                                                                                          | 22  | 2293 | 2289 | 2481 | 37  | 230<br>8 | 2982 | 317<br>4 |  |
| cb8564_c4676/f1p1/2570<br>isoform=cb8564_c4676;full_length_coverage=1;non_full_length_coverage=1;isoform_length=2570;expected_accuracy=0.994   | gnl BL_ORD_ID 10588 cb8564_c117037/f1p1/2690<br>isoform=cb8564_c117037;full_length_coverage=1;non_full_length_coverage=1;isoform_length=2690;expected_accuracy=0.995 | 250 | 2529 | 2    | 249  | 409 | 269<br>0 | 1    | 250      |  |
| cb9146_c8/f1p0/1115<br>isoform=cb9146_c8;full_length_coverage=1;non_full_length_coverage=0;isoform_length=1115;expected_accuracy=0.991         | gnl BL_ORD_ID 21134 cb9146_c11/f5p0/1276<br>isoform=cb9146_c11;full_length_coverage=5;non_full_length_coverage=0;isoform_length=1276;expected_accuracy=1.000         | 101 | 1113 | 1    | 101  | 265 | 127<br>6 | 61   | 161      |  |
| cb500_c17/f1p0/2323<br>isoform=cb500_c17;full_length_coverage=1;non_full_length_coverage=0;isoform_length=2323;expected_accuracy=0.997         | gnl BL_ORD_ID 43084 cb500_c26/f1p0/3434<br>isoform=cb500_c26;full_length_coverage=1;non_full_length_coverage=0;isoform_length=3434;expected_accuracy=0.998           | 1   | 1293 | 1288 | 2323 | 725 | 201<br>7 | 2149 | 318<br>2 |  |
| cb8564_c47011/f1p0/3100                                                                                                                        | gnl BL_ORD_ID 56764 cb8564_c70795/f1p0/3769                                                                                                                          | 21  | 2306 | 2301 | 2934 | 34  | 231      | 2551 | 318      |  |

|                                                                                                                     |                                                                                                                     |                         |      |      |      |      |      |      |      |      |
|---------------------------------------------------------------------------------------------------------------------|---------------------------------------------------------------------------------------------------------------------|-------------------------|------|------|------|------|------|------|------|------|
| cb5690_c8/f1p0/1087                                                                                                 | gnl BL_ORD_ID 46833                                                                                                 | cb5690_c4/f1p0/3237     |      |      |      |      |      | 3    | 0    |      |
| isoform=cb5690_c8;full_length_coverage=11;non_full_length_coverage=0;isoform_length=1087;expected_accuracy=1.000    | isoform=cb5690_c4;full_length_coverage=1;non_full_length_coverage=0;isoform_length=3237;expected_accuracy=0.996     |                         | 348  | 1084 | 49   | 352  | 2502 | 3237 | 1    | 304  |
| cb8564_c90630/f1p0/2172                                                                                             | gnl BL_ORD_ID 18665                                                                                                 | cb8564_c78920/f1p1/3989 |      |      |      |      |      |      |      |      |
| isoform=cb8564_c90630;full_length_coverage=1;non_full_length_coverage=0;isoform_length=2172;expected_accuracy=0.995 | isoform=cb8564_c78920;full_length_coverage=1;non_full_length_coverage=1;isoform_length=3989;expected_accuracy=0.996 |                         | 1    | 1185 | 1181 | 2110 | 1407 | 2588 | 3073 | 3989 |
| cb8564_c43779/f1p0/3021                                                                                             | gnl BL_ORD_ID 55910                                                                                                 | cb8564_c48645/f1p1/3287 |      |      |      |      |      |      |      |      |
| isoform=cb8564_c43779;full_length_coverage=1;non_full_length_coverage=0;isoform_length=3021;expected_accuracy=0.993 |                                                                                                                     |                         | 11   | 2344 | 2345 | 2956 | 17   | 2347 | 2503 | 3113 |
| cb8564_c72349/f1p0/3248                                                                                             | gnl BL_ORD_ID 56713                                                                                                 | cb8564_c53754/f1p0/3446 |      |      |      |      |      |      |      |      |
|                                                                                                                     |                                                                                                                     |                         | 105  | 2662 | 2659 | 3068 | 181  | 2738 | 2897 | 3306 |
| cb8596_c0/f2p0/1748                                                                                                 | gnl BL_ORD_ID 18634                                                                                                 | cb8596_c1/f1p0/2325     |      |      |      |      |      |      |      |      |
| isoform=cb8596_c0;full_length_coverage=2;non_full_length_coverage=0;isoform_length=1748;expected_accuracy=0.999     | isoform=cb8596_c1;full_length_coverage=1;non_full_length_coverage=0;isoform_length=2325;expected_accuracy=0.994     |                         | 1    | 1202 | 1202 | 1748 | 21   | 1233 | 1760 | 2306 |
| cb12972_c15/f1p0/1541                                                                                               | gnl BL_ORD_ID 15126                                                                                                 | cb8564_c2621/f1p1/2401  |      |      |      |      |      |      |      |      |
| isoform=cb12972_c15;full_length_coverage=1;non_full_length_coverage=0;isoform_length=1541;expected_accuracy=0.996   | isoform=cb8564_c2621;full_length_coverage=1;non_full_length_coverage=1;isoform_length=2401;expected_accuracy=1.000  |                         | 205  | 1541 | 7    | 206  | 1051 | 2378 | 1    | 199  |
| cb998_c14/f1p0/3632                                                                                                 | gnl BL_ORD_ID 67910                                                                                                 | cb18641_c0/f1p0/4940    |      |      |      |      |      |      |      |      |
| isoform=cb998_c14;full_length_coverage=1;non_full_length_coverage=0;isoform_length=3632;expected_accuracy=0.996     |                                                                                                                     |                         | 1774 | 3632 | 16   | 1773 | 2925 | 4789 | 1    | 1761 |

|                                                                                                                  |                                                                                                                    |                         |      |      |      |      |      |     |      |     |
|------------------------------------------------------------------------------------------------------------------|--------------------------------------------------------------------------------------------------------------------|-------------------------|------|------|------|------|------|-----|------|-----|
| acy=0.995                                                                                                        |                                                                                                                    |                         |      |      |      |      |      |     |      |     |
| cb5447_c34/f1p0/3194                                                                                             | gnl BL_ORD_ID 45897                                                                                                | cb5447_c33/f1p0/4199    |      |      |      |      |      |     |      |     |
| isoform=cb5447_c34;full_length_coverage=1;non_full_length_coverage=0;isoform_length=3194;expected_accuracy=0.996 | isoform=cb5447_c33;full_length_coverage=1;non_full_length_coverage=0;isoform_length=4199;expected_accuracy=0.997   |                         | 1    | 2170 | 2170 | 3194 | 4    | 215 | 2805 | 382 |
|                                                                                                                  |                                                                                                                    |                         |      |      |      |      |      | 5   |      | 4   |
| cb3290_c38/f1p0/2345                                                                                             | gnl BL_ORD_ID 40880                                                                                                | cb3290_c196/f17p2/2965  |      |      |      |      |      |     |      |     |
| isoform=cb3290_c38;full_length_coverage=1;non_full_length_coverage=0;isoform_length=2345;expected_accuracy=0.996 | isoform=cb3290_c196;full_length_coverage=17;non_full_length_coverage=2;isoform_length=2965;expected_accuracy=1.000 |                         | 1150 | 2345 | 1    | 1151 | 1692 | 289 | 379  | 153 |
|                                                                                                                  |                                                                                                                    |                         |      |      |      |      |      | 4   |      | 5   |
| cb626_c44/f1p1/4252                                                                                              | gnl BL_ORD_ID 4060                                                                                                 | cb626_c17/f1p0/4935     |      |      |      |      |      |     |      |     |
| isoform=cb626_c44;full_length_coverage=1;non_full_length_coverage=1;isoform_length=4252;expected_accuracy=0.990  | isoform=cb626_c17;full_length_coverage=1;non_full_length_coverage=0;isoform_length=4935;expected_accuracy=0.993    |                         | 21   | 3677 | 3677 | 4245 | 48   | 362 | 4370 | 493 |
|                                                                                                                  |                                                                                                                    |                         |      |      |      |      |      | 9   |      | 5   |
| cb2960_c2/f1p0/2155                                                                                              | gnl BL_ORD_ID 36645                                                                                                | cb2960_c4/f1p0/2302     |      |      |      |      |      |     |      |     |
| isoform=cb2960_c2;full_length_coverage=1;non_full_length_coverage=0;isoform_length=2155;expected_accuracy=0.995  | isoform=cb2960_c4;full_length_coverage=1;non_full_length_coverage=0;isoform_length=2302;expected_accuracy=0.995    |                         | 1    | 1707 | 1702 | 2144 | 16   | 172 | 1859 | 230 |
|                                                                                                                  |                                                                                                                    |                         |      |      |      |      |      | 2   |      | 2   |
| cb8564_c2726/f1p0/4270                                                                                           | gnl BL_ORD_ID 13887                                                                                                | cb8564_c2723/f1p0/4402  |      |      |      |      |      |     |      |     |
|                                                                                                                  | isoform=cb8564_c2723;full_length_coverage=1;non_full_length_coverage=0;isoform_length=4402;expected_accuracy=0.996 |                         | 1    | 3089 | 3088 | 4209 | 1    | 308 | 3238 | 435 |
|                                                                                                                  |                                                                                                                    |                         |      |      |      |      |      | 4   |      | 9   |
| cb2831_c57/f3p1/2669                                                                                             | gnl BL_ORD_ID 38321                                                                                                | cb2831_c8/f2p0/3387     |      |      |      |      |      |     |      |     |
| isoform=cb2831_c57;full_length_coverage=3;non_full_length_coverage=1;isoform_length=2669;expected_accuracy=0.997 | isoform=cb2831_c8;full_length_coverage=2;non_full_length_coverage=0;isoform_length=3387;expected_accuracy=1.000    |                         | 121  | 2360 | 2361 | 2668 | 1    | 223 | 3072 | 338 |
|                                                                                                                  |                                                                                                                    |                         |      |      |      |      |      | 8   |      | 0   |
| cb8564_c11802/f1p0/3687                                                                                          | gnl BL_ORD_ID 15343                                                                                                | cb8564_c25122/f1p0/3884 |      |      |      |      |      |     |      |     |
|                                                                                                                  |                                                                                                                    |                         | 1    | 2152 | 2151 | 3687 | 1    | 215 | 2346 | 388 |

|                                                                                                                                                 |                                                                                                                                                                           |      |      |      |      |      |     |      |     |
|-------------------------------------------------------------------------------------------------------------------------------------------------|---------------------------------------------------------------------------------------------------------------------------------------------------------------------------|------|------|------|------|------|-----|------|-----|
| isoform=cb8564_c11802;full_length_coverage=1;non_full_length_coverage=0;isoform_length=3687;expected_accuracy=1.000<br>cb8564_c88176/f1p7/3178  | isoform=cb8564_c25122;full_length_coverage=1;non_full_length_coverage=0;isoform_length=3884;expected_accuracy=0.999<br>gnl BL_ORD_ID 17532      cb8564_c96234/f5p13/3443  |      |      |      |      |      | 2   |      | 4   |
| isoform=cb8564_c88176;full_length_coverage=1;non_full_length_coverage=7;isoform_length=3178;expected_accuracy=0.998<br>cb8564_c110158/f1p0/1948 | isoform=cb8564_c96234;full_length_coverage=5;non_full_length_coverage=13;isoform_length=3443;expected_accuracy=0.994<br>gnl BL_ORD_ID 12332      cb8564_c146529/f7p0/2311 | 611  | 3178 | 63   | 615  | 716  | 328 | 1    | 550 |
| isoform=cb8564_c110158;full_length_coverage=1;non_full_length_coverage=0;isoform_length=1948;expected_accuracy=0.999<br>cb6530_c26/f1p0/2387    | isoform=cb8564_c146529;full_length_coverage=7;non_full_length_coverage=0;isoform_length=2311;expected_accuracy=1.000<br>gnl BL_ORD_ID 5366      cb6530_c23/f1p0/2764      | 129  | 1948 | 10   | 130  | 415  | 223 | 1    | 121 |
| isoform=cb6530_c26;full_length_coverage=1;non_full_length_coverage=0;isoform_length=2387;expected_accuracy=0.998<br>cb12227_c15/f1p2/1760       | isoform=cb6530_c23;full_length_coverage=1;non_full_length_coverage=0;isoform_length=2764;expected_accuracy=0.996<br>gnl BL_ORD_ID 54244      cb8564_c21108/f1p1/1969      | 1009 | 2351 | 1    | 1010 | 1422 | 276 | 311  | 131 |
| isoform=cb12227_c15;full_length_coverage=1;non_full_length_coverage=0;isoform_length=1760;expected_accuracy=0.999<br>cb4433_c10/f1p1/2900       | isoform=cb8564_c21108;full_length_coverage=1;non_full_length_coverage=0;isoform_length=1969;expected_accuracy=0.999<br>gnl BL_ORD_ID 71906      cb4433_c22/f1p0/3300      | 10   | 1643 | 1641 | 1742 | 106  | 173 | 1840 | 194 |
| isoform=cb4433_c10;full_length_coverage=11;non_full_length_coverage=1;isoform_length=2900;expected_accuracy=1.000<br>cb8564_c110003/f2p0/3361   | isoform=cb4433_c22;full_length_coverage=1;non_full_length_coverage=0;isoform_length=3300;expected_accuracy=0.999<br>gnl BL_ORD_ID 12046      cb8564_c126049/f1p0/3874     | 212  | 2900 | 100  | 212  | 466  | 315 | 1    | 113 |
| isoform=cb8564_c110003;full_length_coverage=2;non_full_length_coverage=0;isoform_length=3361;expected_accuracy=0.997<br>cb8564_c44005/f1p0/3815 | isoform=cb8564_c126049;full_length_coverage=1;non_full_length_coverage=0;isoform_length=3874;expected_accuracy=0.997<br>gnl BL_ORD_ID 15822      cb8564_c50372/f4p2/4090  | 1    | 2830 | 2828 | 3316 | 6    | 283 | 2942 | 343 |
|                                                                                                                                                 |                                                                                                                                                                           | 1    | 2046 | 2041 | 3769 | 206  | 225 | 2354 | 409 |

|                                                                                                                                                |                                                                                                                                                                  |      |      |      |      |      |      |      |  |      |
|------------------------------------------------------------------------------------------------------------------------------------------------|------------------------------------------------------------------------------------------------------------------------------------------------------------------|------|------|------|------|------|------|------|--|------|
| isoform=cb8564_c44005;full_length_coverage=1;non_full_length_coverage=0;isoform_length=3815;expected_accuracy=0.993<br>cb8564_c51169/f1p3/3251 | isoform=cb8564_c50372;full_length_coverage=4;non_full_length_coverage=2;isoform_length=4090;expected_accuracy=0.996                                              |      |      |      |      |      |      | 4    |  | 0    |
| isoform=cb8564_c51169;full_length_coverage=1;non_full_length_coverage=3;isoform_length=3251;expected_accuracy=0.993<br>cb8564_c4900/f4p1/3332  | gnl BL_ORD_ID 55830 cb8564_c42264/f1p0/3734                                                                                                                      | 130  | 3205 | 1    | 130  | 288  | 3365 | 6    |  | 136  |
| isoform=cb8564_c4900;full_length_coverage=4;non_full_length_coverage=1;isoform_length=3332;expected_accuracy=1.000<br>cb3824_c7/f1p1/2719      | gnl BL_ORD_ID 15781 cb8564_c4899/f1p0/3376<br>isoform=cb8564_c4899;full_length_coverage=1;non_full_length_coverage=0;isoform_length=3376;expected_accuracy=0.996 | 143  | 2255 | 2254 | 3332 | 1    | 2110 | 2292 |  | 3367 |
| isoform=cb3824_c7;full_length_coverage=1;non_full_length_coverage=1;isoform_length=2719;expected_accuracy=0.996                                | gnl BL_ORD_ID 70639 cb3824_c3/f1p2/3052                                                                                                                          | 252  | 2716 | 2    | 252  | 501  | 2964 | 1    |  | 243  |
| cb9530_c4/f1p1/1777                                                                                                                            | gnl BL_ORD_ID 19496 cb9530_c1/f1p0/2055<br>isoform=cb9530_c1;full_length_coverage=1;non_full_length_coverage=0;isoform_length=2055;expected_accuracy=1.000       | 1    | 1494 | 1493 | 1686 | 6    | 1499 | 1866 |  | 2055 |
| cb5726_c3/f1p0/2930                                                                                                                            | gnl BL_ORD_ID 46682 cb5726_c0/f1p0/3016<br>isoform=cb5726_c0;full_length_coverage=1;non_full_length_coverage=0;isoform_length=3016;expected_accuracy=0.994       | 598  | 2785 | 8    | 599  | 818  | 3008 | 1    |  | 595  |
| cb3290_c38/f1p0/2345                                                                                                                           | gnl BL_ORD_ID 40560 cb3290_c85/f2p1/2883<br>isoform=cb3290_c85;full_length_coverage=2;non_full_length_coverage=1;isoform_length=2883;expected_accuracy=0.994     | 1150 | 2343 | 1    | 1151 | 1690 | 2883 | 273  |  | 1422 |

|                                                                                                                     |                                                                                                                  |    |      |      |      |     |          |      |          |  |
|---------------------------------------------------------------------------------------------------------------------|------------------------------------------------------------------------------------------------------------------|----|------|------|------|-----|----------|------|----------|--|
| racy=0.996                                                                                                          | acy=0.998                                                                                                        |    |      |      |      |     |          |      |          |  |
| cb8564_c113232/flp0/3087                                                                                            | gnl BL_ORD_ID 54608 cb8564_c127899/flp0/3880                                                                     | 2  | 2841 | 2839 | 2997 | 215 | 307<br>5 | 3305 | 346<br>3 |  |
| cb8564_c51780/flp2/3067                                                                                             |                                                                                                                  |    |      |      |      |     |          |      |          |  |
| isoform=cb8564_c51780;full_length_coverage=1;non_full_length_coverage=2;isoform_length=3067;expected_accuracy=0.995 | gnl BL_ORD_ID 54703 cb8564_c156696/flp2/3606                                                                     | 12 | 2308 | 2308 | 3067 | 1   | 229<br>7 | 2828 | 358<br>9 |  |
| cb4163_c10/flp0/2735                                                                                                | gnl BL_ORD_ID 43332 cb4163_c19/f2p1/2896                                                                         |    |      |      |      |     |          |      |          |  |
| isoform=cb4163_c10;full_length_coverage=1;non_full_length_coverage=0;isoform_length=2735;expected_accuracy=0.995    | isoform=cb4163_c19;full_length_coverage=2;non_full_length_coverage=1;isoform_length=2896;expected_accuracy=0.997 | 1  | 1840 | 1841 | 2715 | 42  | 187<br>8 | 2025 | 289<br>6 |  |
| cb7757_c12/flp1/1610                                                                                                | gnl BL_ORD_ID 6689 cb7757_c10/flp1/1977                                                                          |    |      |      |      |     |          |      |          |  |
| isoform=cb7757_c12;full_length_coverage=1;non_full_length_coverage=1;isoform_length=1610;expected_accuracy=0.997    | isoform=cb7757_c10;full_length_coverage=1;non_full_length_coverage=1;isoform_length=1977;expected_accuracy=0.998 | 1  | 1399 | 1397 | 1608 | 1   | 139<br>9 | 1764 | 197<br>7 |  |
| cb5472_c5/flp0/3130                                                                                                 |                                                                                                                  |    |      |      |      |     |          |      |          |  |
| isoform=cb5472_c5;full_length_coverage=1;non_full_length_coverage=0;isoform_length=3130;expected_accuracy=0.995     | gnl BL_ORD_ID 73415 cb5472_c10/flp0/4117                                                                         | 1  | 2614 | 2614 | 3015 | 21  | 265<br>2 | 3683 | 408<br>4 |  |
| cb359_c1/flp0/4935                                                                                                  | gnl BL_ORD_ID 40519 cb359_c0/flp1/4862                                                                           |    |      |      |      |     |          |      |          |  |
|                                                                                                                     | isoform=cb359_c0;full_length_coverage=1;non_full_length_coverage=1;isoform_length=4862;expected_accuracy=0.996   | 10 | 3598 | 3593 | 4027 | 97  | 368<br>3 | 4427 | 486<br>2 |  |
| cb8564_c129284/flp0/2118                                                                                            | gnl BL_ORD_ID 11756 cb8564_c146467/flp0/2494                                                                     |    |      |      |      |     |          |      |          |  |
| isoform=cb8564_c129284;full_length_coverage=1;non_full_length_coverage=0;isoform_length=2118;expected               | isoform=cb8564_c146467;full_length_coverage=10;non_full_length_coverage=0;isoform_length=2494;expected           | 1  | 1970 | 1965 | 2118 | 54  | 202<br>9 | 2213 | 236<br>7 |  |

|                                                                                                                                          |                                                                                                                                                              |     |      |      |      |      |      |      |      |  |
|------------------------------------------------------------------------------------------------------------------------------------------|--------------------------------------------------------------------------------------------------------------------------------------------------------------|-----|------|------|------|------|------|------|------|--|
| accuracy=0.991                                                                                                                           | _accuracy=1.000                                                                                                                                              |     |      |      |      |      |      |      |      |  |
| cb2770_c49/f1p0/2592                                                                                                                     | gnl BL_ORD_ID 69963 cb2770_c47/f1p0/3578                                                                                                                     | 10  | 1688 | 1688 | 2592 | 1    | 1679 | 2474 | 3378 |  |
| cb2737_c49/f1p0/3341                                                                                                                     | gnl BL_ORD_ID 38129 cb2737_c25/f1p0/3198<br>isoform=cb2737_c25;full_length_coverage=1;non_full_length_coverage=0;isoform_length=3198;expected_accuracy=0.997 | 429 | 3092 | 91   | 430  | 536  | 3198 | 1    | 340  |  |
| cb5137_c92/f1p0/2632<br>isoform=cb5137_c92;full_length_coverage=1;non_full_length_coverage=0;isoform_length=2632;expected_accuracy=1.000 | gnl BL_ORD_ID 41994 cb5137_c96/f1p2/2956<br>isoform=cb5137_c96;full_length_coverage=1;non_full_length_coverage=2;isoform_length=2956;expected_accuracy=0.997 | 377 | 2632 | 52   | 381  | 661  | 2917 | 155  | 470  |  |
| cb4916_c5/f1p0/1981                                                                                                                      | gnl BL_ORD_ID 42009 cb4916_c0/f6p1/2108<br>isoform=cb4916_c0;full_length_coverage=6;non_full_length_coverage=1;isoform_length=2108;expected_accuracy=0.995   | 1   | 1417 | 1412 | 2006 | 1    | 1412 | 1512 | 2107 |  |
| cb401_c50/f1p0/2173<br>isoform=cb401_c50;full_length_coverage=1;non_full_length_coverage=0;isoform_length=2173;expected_accuracy=0.998   | gnl BL_ORD_ID 70874 cb401_c49/f1p4/2600                                                                                                                      | 96  | 2171 | 1    | 101  | 259  | 2352 | 18   | 118  |  |
| cb16315_c0/f1p0/1511                                                                                                                     | gnl BL_ORD_ID 43942 cb4391_c2/f1p0/3515<br>isoform=cb4391_c2;full_length_coverage=1;non_full_length_coverage=0;isoform_length=3515;expected_accuracy=0.997   | 113 | 1512 | 1    | 114  | 1978 | 3377 | 812  | 924  |  |
| cb510_c11/f1p0/3703<br>isoform=cb510_c11;full_length_coverage=1;non_full_length_coverage=0;isoform_length=3703;expected_accuracy=0.997   | gnl BL_ORD_ID 42977 cb510_c2/f2p0/3807<br>isoform=cb510_c2;full_length_coverage=2;non_full_length_coverage=0;isoform_length=3807;expected_accuracy=0.997     | 15  | 3215 | 3211 | 3653 | 1    | 3201 | 3347 | 3797 |  |



|                         |                                                                                                                                                                         |     |      |      |      |     |      |      |      |  |
|-------------------------|-------------------------------------------------------------------------------------------------------------------------------------------------------------------------|-----|------|------|------|-----|------|------|------|--|
| acy=0.995               | y=0.993                                                                                                                                                                 |     |      |      |      |     |      |      |      |  |
| cb8564_c11123/f1p2/2599 | gnl BL_ORD_ID 11179      cb8564_c11761/f4p0/2940<br>isoform=cb8564_c11761;full_length_coverage=4;non_full_length_coverage=0;isoform_length=2940;expected_accuracy=0.996 | 1   | 1693 | 1689 | 2491 | 115 | 1807 | 2043 | 2845 |  |
| cb8564_c36689/f1p1/2368 | gnl BL_ORD_ID 55359      cb8564_c39546/f1p2/3023<br>isoform=cb8564_c36689;full_length_coverage=1;non_full_length_coverage=1;isoform_length=2368;expected_accuracy=0.991 | 1   | 1709 | 1706 | 2368 | 1   | 1672 | 2171 | 2835 |  |
| cb2218_c8/f1p1/2956     | gnl BL_ORD_ID 68349      cb2218_c5/f1p0/4008<br>isoform=cb2218_c8;full_length_coverage=1;non_full_length_coverage=1;isoform_length=2956;expected_accuracy=0.996         | 109 | 2956 | 1    | 112  | 313 | 3162 | 30   | 141  |  |
| cb8374_c4/f1p0/2094     | gnl BL_ORD_ID 9986      cb8374_c2/f1p0/2333<br>isoform=cb8374_c4;full_length_coverage=1;non_full_length_coverage=0;isoform_length=2094;expected_accuracy=0.992          | 14  | 1890 | 1887 | 2091 | 1   | 1875 | 2061 | 2273 |  |
| cb3907_c1/f4p0/2661     | gnl BL_ORD_ID 40128      cb3907_c4/f1p0/3038<br>isoform=cb3907_c1;full_length_coverage=4;non_full_length_coverage=0;isoform_length=2661;expected_accuracy=0.997         | 1   | 1494 | 1495 | 2661 | 14  | 1502 | 1872 | 3038 |  |
| cb6111_c34/f1p0/1434    | gnl BL_ORD_ID 46715      cb6111_c23/f1p0/1599<br>isoform=cb6111_c34;full_length_coverage=1;non_full_length_coverage=0;isoform_length=1434;expected_accuracy=0.992       | 121 | 1434 | 1    | 122  | 269 | 1579 | 3    | 126  |  |
| cb3451_c8/f1p0/1800     | gnl BL_ORD_ID 41079      cb3451_c7/f2p0/2047                                                                                                                            | 103 | 1800 | 1    | 106  | 345 | 204  | 78   | 183  |  |

|                                                                                                                     |                                                                                                                       |     |      |      |      |     |  |     |      |     |  |   |
|---------------------------------------------------------------------------------------------------------------------|-----------------------------------------------------------------------------------------------------------------------|-----|------|------|------|-----|--|-----|------|-----|--|---|
| isoform=cb3451_c8;full_length_coverage=1;non_full_length_coverage=0;isoform_length=1800;expected_accuracy=0.997     | isoform=cb3451_c7;full_length_coverage=2;non_full_length_coverage=0;isoform_length=2047;expected_accuracy=1.000       |     |      |      |      |     |  |     |      |     |  | 1 |
| cb8564_c37361/f1p0/3076                                                                                             | gnl BL_ORD_ID 56002 cb8564_c51722/f1p1/3503                                                                           | 21  | 2481 | 2477 | 3070 | 67  |  | 252 | 2624 | 321 |  |   |
| cb8564_c16240/f1p3/2671                                                                                             | gnl BL_ORD_ID 11985 cb8564_c146172/f1p0/3320                                                                          |     |      |      |      |     |  |     |      |     |  |   |
| isoform=cb8564_c16240;full_length_coverage=1;non_full_length_coverage=3;isoform_length=2671;expected_accuracy=0.997 | isoform=cb8564_c146172;full_length_coverage=11;non_full_length_coverage=0;isoform_length=3320;expected_accuracy=1.000 | 1   | 2075 | 2072 | 2671 | 47  |  | 212 | 2659 | 325 |  |   |
| cb12422_c8/f1p1/1600                                                                                                | gnl BL_ORD_ID 23066 cb12422_c22/f35p1/1776                                                                            |     |      |      |      |     |  |     |      |     |  |   |
| isoform=cb12422_c8;full_length_coverage=1;non_full_length_coverage=1;isoform_length=1600;expected_accuracy=0.996    | isoform=cb12422_c22;full_length_coverage=35;non_full_length_coverage=1;isoform_length=1776;expected_accuracy=1.000    | 281 | 1600 | 4    | 285  | 456 |  | 177 | 60   | 345 |  |   |
| cb1569_c4/f1p0/2788                                                                                                 | gnl BL_ORD_ID 29609 cb1569_c3/f1p0/4264                                                                               |     |      |      |      |     |  |     |      |     |  |   |
| isoform=cb1569_c4;full_length_coverage=1;non_full_length_coverage=0;isoform_length=2788;expected_accuracy=0.993     | isoform=cb1569_c3;full_length_coverage=1;non_full_length_coverage=0;isoform_length=4264;expected_accuracy=0.994       | 1   | 2367 | 2363 | 2788 | 1   |  | 236 | 3771 | 419 |  |   |
| cb2803_c6/f1p0/2449                                                                                                 | gnl BL_ORD_ID 38212 cb2803_c5/f1p0/2932                                                                               |     |      |      |      |     |  |     |      |     |  |   |
| isoform=cb2803_c6;full_length_coverage=1;non_full_length_coverage=0;isoform_length=2449;expected_accuracy=0.990     | isoform=cb2803_c5;full_length_coverage=1;non_full_length_coverage=0;isoform_length=2932;expected_accuracy=0.998       | 1   | 2024 | 2023 | 2449 | 18  |  | 203 | 2505 | 293 |  |   |
| cb2087_c5/f1p0/3142                                                                                                 | gnl BL_ORD_ID 36296 cb2087_c11/f1p1/3204                                                                              |     |      |      |      |     |  |     |      |     |  |   |
| isoform=cb2087_c5;full_length_coverage=1;non_full_length_coverage=0;isoform_length=3142;expected_accuracy=0.991     | isoform=cb2087_c11;full_length_coverage=1;non_full_length_coverage=1;isoform_length=3204;expected_accuracy=0.994      | 325 | 3131 | 34   | 328  | 398 |  | 320 | 1    | 297 |  |   |
| cb289_c5/f1p0/4379                                                                                                  | gnl BL_ORD_ID 37169 cb289_c16/f1p0/4532                                                                               | 1   | 4156 | 4156 | 4379 | 1   |  | 415 | 4253 | 447 |  |   |

|                                                                                                                                                |                                                                                                                                                                                         |     |      |      |      |      |          |      |          |
|------------------------------------------------------------------------------------------------------------------------------------------------|-----------------------------------------------------------------------------------------------------------------------------------------------------------------------------------------|-----|------|------|------|------|----------|------|----------|
| isoform=cb289_c5;full_length_coverage=1;non_full_length_coverage=0;isoform_length=4379;expected_accuracy=0.997<br>cb8564_c10872/f1p2/2947      | isoform=cb289_c16;full_length_coverage=1;non_full_length_coverage=0;isoform_length=4532;expected_accuracy=0.992                                                                         |     |      |      |      |      |          | 2    | 4        |
| isoform=cb8564_c10872;full_length_coverage=1;non_full_length_coverage=2;isoform_length=2947;expected_accuracy=0.994                            | gnl BL_ORD_ID 53939 cb8564_c15654/f1p1/3152                                                                                                                                             | 1   | 2667 | 2666 | 2917 | 114  | 277<br>4 | 2915 | 316<br>7 |
| cb938_c15/f1p0/3219                                                                                                                            | gnl BL_ORD_ID 59101 cb938_c9/f1p0/4170                                                                                                                                                  | 1   | 2546 | 2541 | 3183 | 1    | 254<br>8 | 3521 | 416<br>3 |
| cb1333_c101/f1p0/1395<br>isoform=cb1333_c101;full_length_coverage=1;non_full_length_coverage=0;isoform_length=1395;expected_accuracy=0.997     | gnl BL_ORD_ID 26655                      cb1333_c7/f6p1/4935<br>isoform=cb1333_c7;full_length_coverage=6;non_full_length_coverage=1;isoform_length=4935;expected_accuracy=1.000         | 149 | 1395 | 27   | 150  | 3610 | 485<br>4 | 31   | 154      |
| cb8564_c38035/f1p0/2770                                                                                                                        | gnl BL_ORD_ID 57175 cb8564_c85646/f1p0/3480                                                                                                                                             | 19  | 2035 | 2033 | 2747 | 106  | 212<br>5 | 2315 | 303<br>0 |
| cb8564_c41756/f1p0/2738<br>isoform=cb8564_c41756;full_length_coverage=1;non_full_length_coverage=0;isoform_length=2738;expected_accuracy=0.996 | gnl BL_ORD_ID 16805                      cb8564_c66657/f4p6/2862<br>isoform=cb8564_c66657;full_length_coverage=4;non_full_length_coverage=6;isoform_length=2862;expected_accuracy=1.000 | 1   | 2173 | 2170 | 2734 | 29   | 217<br>6 | 2299 | 286<br>2 |
| cb3290_c35/f1p0/2163<br>isoform=cb3290_c35;full_length_coverage=1;non_full_length_coverage=0;isoform_length=2163;expected_accuracy=0.995       | gnl BL_ORD_ID 41313                      cb3290_c33/f1p0/3704<br>isoform=cb3290_c33;full_length_coverage=1;non_full_length_coverage=0;isoform_length=3704;expected_accuracy=0.998       | 14  | 1507 | 1508 | 2163 | 6    | 150<br>1 | 1619 | 227<br>5 |
| cb1052_c55/f1p0/2730                                                                                                                           | gnl BL_ORD_ID 1189                      cb1052_c16/f1p0/2854<br>isoform=cb1052_c16;full_length_coverage=1;non_full_length_coverage=0;isoform_length=2854;expected_accuracy=0.992        | 599 | 2726 | 75   | 604  | 730  | 285<br>4 | 1    | 525      |

|                                                                                                                                                |                                                                                                                                                                                                |     |      |      |      |      |          |      |          |
|------------------------------------------------------------------------------------------------------------------------------------------------|------------------------------------------------------------------------------------------------------------------------------------------------------------------------------------------------|-----|------|------|------|------|----------|------|----------|
| cb1812_c29/f1p0/2465<br>isoform=cb1812_c29;full_length_coverage=1;non_full_length_coverage=0;isoform_length=2465;expected_accuracy=0.992       | acy=0.995<br>gnl BL_ORD_ID 34232                      cb1812_c24/f1p0/4164<br>isoform=cb1812_c24;full_length_coverage=1;non_full_length_coverage=0;isoform_length=4164;expected_accuracy=0.996 | 280 | 2465 | 3    | 282  | 1981 | 416<br>4 | 1    | 281      |
| cb15510_c5/f1p1/1580                                                                                                                           | gnl BL_ORD_ID 72095   cb5048_c6/f1p0/2038                                                                                                                                                      | 1   | 1243 | 1243 | 1518 | 23   | 126<br>5 | 1706 | 198<br>1 |
| cb8564_c41756/f1p0/2738<br>isoform=cb8564_c41756;full_length_coverage=1;non_full_length_coverage=0;isoform_length=2738;expected_accuracy=0.996 | gnl BL_ORD_ID 55873   cb8564_c47701/f1p0/3144                                                                                                                                                  | 12  | 2173 | 2170 | 2738 | 24   | 218<br>9 | 2312 | 288<br>0 |
| cb8564_c36689/f1p1/2368<br>isoform=cb8564_c36689;full_length_coverage=1;non_full_length_coverage=1;isoform_length=2368;expected_accuracy=0.991 | gnl BL_ORD_ID 55280   cb8564_c37198/f1p5/2941                                                                                                                                                  | 1   | 1709 | 1706 | 2368 | 1    | 170<br>3 | 2260 | 292<br>4 |
| cb4367_c10/f1p1/1298<br>isoform=cb4367_c10;full_length_coverage=1;non_full_length_coverage=1;isoform_length=1298;expected_accuracy=0.995       | gnl BL_ORD_ID 42900                      cb4367_c2/f1p1/2510<br>isoform=cb4367_c2;full_length_coverage=1;non_full_length_coverage=1;isoform_length=2510;expected_accuracy=0.991                | 1   | 1129 | 1126 | 1298 | 20   | 1143     | 2289 | 245<br>7 |
| cb8564_c49562/f1p0/2838<br>isoform=cb8564_c49562;full_length_coverage=1;non_full_length_coverage=0;isoform_length=2838;expected_accuracy=0.995 | gnl BL_ORD_ID 54438   cb8564_c46124/f1p0/3383                                                                                                                                                  | 1   | 2331 | 2327 | 2836 | 147  | 248<br>2 | 2589 | 310<br>4 |
| cb8564_c39136/f1p0/3036<br>isoform=cb8564_c39136;full_length_coverage=1;non_full_length_coverage=0;isoform_length=3036;expected_               | gnl BL_ORD_ID 57017   cb8564_c80370/f1p0/3493                                                                                                                                                  | 118 | 2089 | 2085 | 3036 | 3085 | 1109     | 982  | 29       |

|                                                                                                                     |                                                                                                                      |                          |     |      |      |      |      |      |      |      |  |
|---------------------------------------------------------------------------------------------------------------------|----------------------------------------------------------------------------------------------------------------------|--------------------------|-----|------|------|------|------|------|------|------|--|
| accuracy=0.998                                                                                                      |                                                                                                                      |                          |     |      |      |      |      |      |      |      |  |
| cb3147_c6/f1p0/2136                                                                                                 | gnl BL_ORD_ID 38849                                                                                                  | cb3147_c3/f1p0/2291      |     |      |      |      |      |      |      |      |  |
| isoform=cb3147_c6;full_length_coverage=1;non_full_length_coverage=0;isoform_length=2136;expected_accuracy=1.000     | isoform=cb3147_c3;full_length_coverage=1;non_full_length_coverage=0;isoform_length=2291;expected_accuracy=0.993      |                          | 1   | 1270 | 1268 | 2130 | 32   | 1306 | 1457 | 2291 |  |
| cb1279_c10/f2p0/2859                                                                                                | gnl BL_ORD_ID 27064                                                                                                  | cb1279_c45/f1p3/3848     |     |      |      |      |      |      |      |      |  |
| isoform=cb1279_c10;full_length_coverage=2;non_full_length_coverage=0;isoform_length=2859;expected_accuracy=0.999    | isoform=cb1279_c45;full_length_coverage=1;non_full_length_coverage=3;isoform_length=3848;expected_accuracy=0.999     |                          | 202 | 2859 | 13   | 203  | 1146 | 3800 | 3    | 195  |  |
| cb8564_c40764/f1p0/2563                                                                                             | gnl BL_ORD_ID 13512                                                                                                  | cb8564_c186209/f1p0/2931 |     |      |      |      |      |      |      |      |  |
| isoform=cb8564_c40764;full_length_coverage=1;non_full_length_coverage=0;isoform_length=2563;expected_accuracy=0.997 | isoform=cb8564_c186209;full_length_coverage=1;non_full_length_coverage=0;isoform_length=2931;expected_accuracy=0.996 |                          | 1   | 2167 | 2162 | 2563 | 1    | 2144 | 2351 | 2752 |  |
| cb1684_c4/f1p0/3388                                                                                                 | gnl BL_ORD_ID 31193                                                                                                  | cb1684_c0/f1p0/4194      |     |      |      |      |      |      |      |      |  |
| isoform=cb1684_c4;full_length_coverage=1;non_full_length_coverage=0;isoform_length=3388;expected_accuracy=0.999     | isoform=cb1684_c0;full_length_coverage=1;non_full_length_coverage=0;isoform_length=4194;expected_accuracy=0.995      |                          | 1   | 1873 | 1872 | 3388 | 38   | 1909 | 2479 | 4001 |  |
| cb6084_c10/f1p0/2883                                                                                                | gnl BL_ORD_ID 44988                                                                                                  | cb6084_c3/f1p0/4275      |     |      |      |      |      |      |      |      |  |
| isoform=cb6084_c10;full_length_coverage=1;non_full_length_coverage=0;isoform_length=2883;expected_accuracy=0.992    | isoform=cb6084_c3;full_length_coverage=1;non_full_length_coverage=0;isoform_length=4275;expected_accuracy=0.993      |                          | 1   | 1850 | 1849 | 2883 | 1    | 1858 | 3139 | 4179 |  |
| cb8564_c15653/f1p4/2475                                                                                             | gnl BL_ORD_ID 15554                                                                                                  | cb8564_c47252/f1p0/2795  |     |      |      |      |      |      |      |      |  |
|                                                                                                                     | isoform=cb8564_c47252;full_length_coverage=1;non_full_length_coverage=0;isoform_length=2795;expected_accuracy=0.997  |                          | 1   | 2293 | 2289 | 2482 | 4    | 2296 | 2514 | 2707 |  |
| cb8564_c41162/f1p0/3158                                                                                             | gnl BL_ORD_ID 58037                                                                                                  | cb8564_c87188/f1p1/3426  |     |      |      |      |      |      |      |      |  |
|                                                                                                                     |                                                                                                                      |                          | 25  | 2553 | 2548 | 3042 | 127  | 265  | 2789 | 328  |  |

|                                                                                                                     |                                                                                                                      |     |      |      |      |     |     |      |     |
|---------------------------------------------------------------------------------------------------------------------|----------------------------------------------------------------------------------------------------------------------|-----|------|------|------|-----|-----|------|-----|
|                                                                                                                     |                                                                                                                      |     |      |      |      |     |     | 8    | 3   |
| cb8564_c51172/f1p0/3367                                                                                             | gnl BL_ORD_ID 55920 cb8564_c48949/f1p0/4357                                                                          | 21  | 2311 | 2312 | 2973 | 18  | 229 | 2847 | 350 |
|                                                                                                                     |                                                                                                                      |     |      |      |      |     | 3   |      | 5   |
| cb8564_c43779/f1p0/3021                                                                                             |                                                                                                                      |     |      |      |      |     |     |      |     |
| isoform=cb8564_c43779;full_length_coverage=1;non_full_length_coverage=0;isoform_length=3021;expected_accuracy=0.993 | gnl BL_ORD_ID 58037 cb8564_c87188/f1p1/3426                                                                          | 20  | 2344 | 2345 | 3021 | 127 | 245 | 2606 | 328 |
|                                                                                                                     |                                                                                                                      |     |      |      |      |     | 0   |      | 1   |
| cb8564_c5094/f3p0/3851                                                                                              | gnl BL_ORD_ID 16742 cb8564_c628/f3p1/4943                                                                            |     |      |      |      |     |     |      |     |
| isoform=cb8564_c5094;full_length_coverage=3;non_full_length_coverage=0;isoform_length=3851;expected_accuracy=1.000  | isoform=cb8564_c628;full_length_coverage=3;non_full_length_coverage=1;isoform_length=4943;expected_accuracy=1.000    | 1   | 1913 | 1911 | 3767 | 4   | 191 | 3085 | 494 |
|                                                                                                                     |                                                                                                                      |     |      |      |      |     | 6   |      | 3   |
| cb18456_c6530/f1p0/1200                                                                                             | gnl BL_ORD_ID 35900 cb18456_c3965/f1p2/1734                                                                          |     |      |      |      |     |     |      |     |
|                                                                                                                     | isoform=cb18456_c3965;full_length_coverage=1;non_full_length_coverage=2;isoform_length=1734;expected_accuracy=0.995  | 260 | 1166 | 3    | 259  | 759 | 166 | 8    | 264 |
|                                                                                                                     |                                                                                                                      |     |      |      |      |     | 3   |      |     |
| cb7639_c15/f1p0/2203                                                                                                |                                                                                                                      |     |      |      |      |     |     |      |     |
| isoform=cb7639_c15;full_length_coverage=1;non_full_length_coverage=0;isoform_length=2203;expected_accuracy=0.998    | gnl BL_ORD_ID 51427 cb7639_c11/f1p0/2532                                                                             | 1   | 1804 | 1803 | 2203 | 2   | 180 | 2081 | 250 |
|                                                                                                                     |                                                                                                                      |     |      |      |      |     | 1   |      | 8   |
| cb8564_c2323/f1p0/2212                                                                                              | gnl BL_ORD_ID 13199 cb8564_c182089/f1p0/2445                                                                         |     |      |      |      |     |     |      |     |
| isoform=cb8564_c2323;full_length_coverage=1;non_full_length_coverage=0;isoform_length=2212;expected_accuracy=0.995  | isoform=cb8564_c182089;full_length_coverage=1;non_full_length_coverage=0;isoform_length=2445;expected_accuracy=1.000 | 1   | 1320 | 1316 | 2208 | 1   | 132 | 1553 | 244 |
|                                                                                                                     |                                                                                                                      |     |      |      |      |     | 0   |      | 5   |
| cb2662_c6/f1p0/2449                                                                                                 | gnl BL_ORD_ID 38855 cb2662_c2/f1p0/3909                                                                              |     |      |      |      |     |     |      |     |
| isoform=cb2662_c6;full_length_coverage=1;non_full_length_coverage=0;isoform_length=2449;expected_accuracy=0.995     | isoform=cb2662_c2;full_length_coverage=1;non_full_length_coverage=0;isoform_length=3909;expected_accuracy=0.995      | 1   | 2243 | 2238 | 2449 | 680 | 292 | 3635 | 384 |
|                                                                                                                     |                                                                                                                      |     |      |      |      |     | 0   |      | 7   |

|                                                                                                                                                                            |                                                                                                                                                                                     |     |      |      |      |     |     |      |     |
|----------------------------------------------------------------------------------------------------------------------------------------------------------------------------|-------------------------------------------------------------------------------------------------------------------------------------------------------------------------------------|-----|------|------|------|-----|-----|------|-----|
| acy=0.993<br>cb8564_c185920/f1p0/2777<br>isoform=cb8564_c185920;full_length_coverage=1;non_full_length_coverage=0;isoform_length=2777;expected_accuracy=0.996              | cy=0.995<br>gnl BL_ORD_ID 15153      cb8564_c36883/f1p0/3072<br>isoform=cb8564_c36883;full_length_coverage=1;non_full_length_coverage=0;isoform_length=3072;expected_accuracy=0.996 | 174 | 2777 | 1    | 177  | 351 | 295 | 15   | 192 |
| cb3678_c20/f1p0/3156<br>isoform=cb3678_c20;full_length_coverage=11;non_full_length_coverage=0;isoform_length=3156;expected_accuracy=1.000                                  | gnl BL_ORD_ID 41572      cb3678_c2/f2p0/3245<br>isoform=cb3678_c2;full_length_coverage=2;non_full_length_coverage=0;isoform_length=3245;expected_accuracy=1.000                     | 493 | 3154 | 64   | 496  | 583 | 324 | 22   | 454 |
| cb3586_c10/f1p0/2722<br>isoform=cb3586_c10;full_length_coverage=1;non_full_length_coverage=0;isoform_length=2722;expected_accuracy=0.993                                   | gnl BL_ORD_ID 41150      cb3586_c3/f1p0/2988<br>isoform=cb3586_c3;full_length_coverage=1;non_full_length_coverage=0;isoform_length=2988;expected_accuracy=0.993                     | 252 | 2722 | 1    | 252  | 443 | 290 | 22   | 274 |
| cb4016_c33/f1p0/2507<br><br>cb8564_c20551/f2p0/2429<br>isoform=cb8564_c20551;full_length_coverage=2;non_full_length_coverage=0;isoform_length=2429;expected_accuracy=0.999 | gnl BL_ORD_ID 40900      cb4016_c14/f1p0/2928<br>isoform=cb4016_c14;full_length_coverage=1;non_full_length_coverage=0;isoform_length=2928;expected_accuracy=0.994                   | 207 | 2462 | 1    | 208  | 549 | 280 | 25   | 249 |
| cb7642_c139/f1p0/2022<br>isoform=cb7642_c139;full_length_coverage=1;non_full_length_coverage=0;isoform_length=2022;expected_accuracy=0.993                                 | gnl BL_ORD_ID 57228      cb8564_c87142/f1p0/3290                                                                                                                                    | 1   | 2235 | 2235 | 2429 | 75  | 230 | 2598 | 279 |
| cb8564_c45699/f1p0/3005                                                                                                                                                    | gnl BL_ORD_ID 50637      cb7642_c158/f1p0/2441                                                                                                                                      | 1   | 1475 | 1476 | 1994 | 200 | 167 | 1871 | 239 |
|                                                                                                                                                                            | gnl BL_ORD_ID 55844      cb8564_c44552/f1p0/3216                                                                                                                                    | 101 | 1888 | 1884 | 2842 | 129 | 193 | 2068 | 302 |

|                                                                                                                                                |                                                                                                                                                                    |     |      |      |      |      |          |      |          |
|------------------------------------------------------------------------------------------------------------------------------------------------|--------------------------------------------------------------------------------------------------------------------------------------------------------------------|-----|------|------|------|------|----------|------|----------|
|                                                                                                                                                |                                                                                                                                                                    |     |      |      |      |      |          | 0    | 8        |
| cb8995_c8/f1p0/2000<br>isoform=cb8995_c8;full_length_coverage=1;non_full_length_coverage=0;isoform_length=2000;expected_accuracy=1.000         | gnl BL_ORD_ID 59425 cb8995_c11/f1p0/2278                                                                                                                           | 97  | 2000 | 1    | 100  | 277  | 218<br>1 | 66   | 165      |
| cb6199_c22/f1p0/2552<br>isoform=cb6199_c22;full_length_coverage=1;non_full_length_coverage=0;isoform_length=2552;expected_accuracy=0.998       | gnl BL_ORD_ID 4354 cb6199_c20/f1p0/3192<br>isoform=cb6199_c20;full_length_coverage=1;non_full_length_coverage=0;isoform_length=3192;expected_accuracy=0.995        | 259 | 2552 | 3    | 261  | 749  | 304<br>1 | 3    | 246      |
| cb8564_c45300/f1p4/3014<br>isoform=cb8564_c45300;full_length_coverage=1;non_full_length_coverage=4;isoform_length=3014;expected_accuracy=0.996 | gnl BL_ORD_ID 14838 cb8564_c34060/f2p0/3214<br>isoform=cb8564_c34060;full_length_coverage=2;non_full_length_coverage=0;isoform_length=3214;expected_accuracy=0.993 | 243 | 3014 | 1    | 246  | 432  | 321<br>4 | 6    | 273      |
| cb964_c10/f1p0/2954<br>isoform=cb964_c10;full_length_coverage=1;non_full_length_coverage=0;isoform_length=2954;expected_accuracy=0.996         | gnl BL_ORD_ID 59142 cb964_c19/f1p0/4670                                                                                                                            | 147 | 2954 | 1    | 151  | 1582 | 438<br>9 | 122  | 272      |
| cb8564_c43917/f1p0/2346<br>isoform=cb8564_c43917;full_length_coverage=1;non_full_length_coverage=0;isoform_length=2346;expected_accuracy=1.000 | gnl BL_ORD_ID 55201 cb8564_c35323/f1p0/3479                                                                                                                        | 1   | 1728 | 1729 | 2242 | 93   | 181<br>9 | 2851 | 336<br>4 |
| cb1956_c25/f1p0/3810<br>isoform=cb1956_c4;full_length_coverage=3;non_full_length_coverage=0;isoform_length=3816;expected_accuracy=0.997        | gnl BL_ORD_ID 36250 cb1956_c4/f3p0/3816<br>isoform=cb1956_c4;full_length_coverage=3;non_full_length_coverage=0;isoform_length=3816;expected_accuracy=0.997         | 11  | 2553 | 2553 | 2990 | 1    | 254<br>1 | 3392 | 381<br>6 |
| cb8564_c68314/f3p1/1908                                                                                                                        | gnl BL_ORD_ID 11097 cb8564_c111419/f2p1/2850                                                                                                                       | 1   | 1318 | 1317 | 1908 | 8    | 133      | 2255 | 283      |



|                                                                                                                     |                                                                                                                                                                         |     |      |      |      |      |     |      |     |
|---------------------------------------------------------------------------------------------------------------------|-------------------------------------------------------------------------------------------------------------------------------------------------------------------------|-----|------|------|------|------|-----|------|-----|
| isoform=cb8564_c68314;full_length_coverage=3;non_full_length_coverage=1;isoform_length=1908;expected_accuracy=1.000 | isoform=cb8564_c111419;full_length_coverage=2;non_full_length_coverage=1;isoform_length=2850;expected_accuracy=1.000                                                    |     |      |      |      |      |     | 1    | 0   |
| cb12685_c3/f1p2/1466                                                                                                | gnl BL_ORD_ID 14860      cb8564_c24783/f1p1/3102<br>isoform=cb8564_c24783;full_length_coverage=1;non_full_length_coverage=1;isoform_length=3102;expected_accuracy=0.992 | 1   | 1294 | 1292 | 1463 | 16   | 134 | 2929 | 310 |
| cb90_c17/f1p1/4529                                                                                                  | gnl BL_ORD_ID 59036      cb90_c11/f1p0/4874<br>isoform=cb90_c17;full_length_coverage=1;non_full_length_coverage=1;isoform_length=4529;expected_accuracy=0.992           | 350 | 4529 | 21   | 349  | 712  | 488 | 148  | 477 |
| cb8564_c3183/f2p1/2280                                                                                              | gnl BL_ORD_ID 14565      cb8564_c3180/f1p0/3132<br>isoform=cb8564_c3183;full_length_coverage=2;non_full_length_coverage=1;isoform_length=2280;expected_accuracy=0.994   | 355 | 2280 | 63   | 352  | 961  | 288 | 1    | 290 |
| cb3988_c15/f1p0/2853                                                                                                | gnl BL_ORD_ID 41321      cb3988_c1/f1p1/3470<br>isoform=cb3988_c15;full_length_coverage=1;non_full_length_coverage=0;isoform_length=2853;expected_accuracy=0.997        | 1   | 1802 | 1798 | 2846 | 261  | 205 | 2423 | 347 |
| cb1988_c2/f4p2/3928                                                                                                 | gnl BL_ORD_ID 35813      cb1988_c27/f1p0/5263<br>isoform=cb1988_c2;full_length_coverage=4;non_full_length_coverage=2;isoform_length=3928;expected_accuracy=1.000        | 1   | 2672 | 2670 | 3892 | 1    | 267 | 4043 | 526 |
| cb8564_c51223/f1p4/1975                                                                                             | gnl BL_ORD_ID 52763      cb8564_c13243/f1p0/4432                                                                                                                        | 207 | 1937 | 21   | 208  | 2440 | 417 | 4    | 191 |
| cb4945_c3/f1p0/2690                                                                                                 | gnl BL_ORD_ID 73110      cb4945_c1/f1p0/3164                                                                                                                            | 1   | 1933 | 1930 | 2690 | 14   | 195 | 2295 | 305 |

|                                                                                                                     |                                                                                                                     |                         |      |      |      |      |      |     |      |     |
|---------------------------------------------------------------------------------------------------------------------|---------------------------------------------------------------------------------------------------------------------|-------------------------|------|------|------|------|------|-----|------|-----|
| isoform=cb4945_c3;full_length_coverage=1;non_full_length_coverage=0;isoform_length=2690;expected_accuracy=0.999     |                                                                                                                     |                         |      |      |      |      |      | 2   |      | 5   |
| cb8564_c44063/f1p0/2503                                                                                             |                                                                                                                     |                         |      |      |      |      |      |     |      |     |
| isoform=cb8564_c44063;full_length_coverage=1;non_full_length_coverage=0;isoform_length=2503;expected_accuracy=0.999 | gnl BL_ORD_ID 55231                                                                                                 | cb8564_c36011/f1p0/3015 | 397  | 2503 | 7    | 402  | 553  | 267 | 10   | 408 |
| cb8564_c87466/f1p1/3006                                                                                             | gnl BL_ORD_ID 16705                                                                                                 | cb8564_c53880/f1p0/3484 |      |      |      |      |      |     |      |     |
| isoform=cb8564_c87466;full_length_coverage=1;non_full_length_coverage=1;isoform_length=3006;expected_accuracy=0.994 | isoform=cb8564_c53880;full_length_coverage=1;non_full_length_coverage=0;isoform_length=3484;expected_accuracy=0.996 |                         | 1069 | 2900 | 1    | 1070 | 1672 | 348 | 1    | 105 |
| cb8564_c22279/f1p0/2983                                                                                             | gnl BL_ORD_ID 17366                                                                                                 | cb8564_c80423/f1p0/3018 |      |      |      |      |      |     |      |     |
| isoform=cb8564_c22279;full_length_coverage=1;non_full_length_coverage=0;isoform_length=2983;expected_accuracy=0.997 | isoform=cb8564_c80423;full_length_coverage=1;non_full_length_coverage=0;isoform_length=3018;expected_accuracy=1.000 |                         | 1    | 2095 | 2096 | 2897 | 1    | 209 | 2219 | 301 |
| cb8564_c86566/f1p0/2178                                                                                             | gnl BL_ORD_ID 57978                                                                                                 | cb8564_c85833/f1p0/2942 | 10   | 1709 | 1707 | 2194 | 12   | 170 | 2309 | 279 |
| cb8564_c43399/f1p0/2654                                                                                             |                                                                                                                     |                         |      |      |      |      |      | 9   |      | 5   |
| isoform=cb8564_c43399;full_length_coverage=1;non_full_length_coverage=0;isoform_length=2654;expected_accuracy=0.999 | gnl BL_ORD_ID 55962                                                                                                 | cb8564_c50282/f1p0/4402 | 15   | 2367 | 2363 | 2653 | 1457 | 380 | 4020 | 431 |
| cb8564_c50076/f1p1/2461                                                                                             | gnl BL_ORD_ID 12455                                                                                                 | cb8564_c12908/f1p0/2790 |      |      |      |      |      |     |      |     |
| isoform=cb8564_c50076;full_length_coverage=1;non_full_length_coverage=1;isoform_length=2461;expected_accuracy=0.993 | isoform=cb8564_c12908;full_length_coverage=1;non_full_length_coverage=0;isoform_length=2790;expected_accuracy=0.996 |                         | 1    | 1679 | 1675 | 2452 | 5    | 168 | 2009 | 279 |
| cb8564_c120694/f1p0/2801                                                                                            | gnl BL_ORD_ID 17728                                                                                                 | cb8564_c87595/f1p0/4323 | 260  | 2800 | 2    | 260  | 1793 | 432 | 1    | 257 |

|                                                                                                                      |                                                                                                                                                                                         |     |      |      |      |      |  |     |      |     |   |   |
|----------------------------------------------------------------------------------------------------------------------|-----------------------------------------------------------------------------------------------------------------------------------------------------------------------------------------|-----|------|------|------|------|--|-----|------|-----|---|---|
| isoform=cb8564_c120694;full_length_coverage=1;non_full_length_coverage=0;isoform_length=2801;expected_accuracy=0.997 | isoform=cb8564_c87595;full_length_coverage=1;non_full_length_coverage=0;isoform_length=4323;expected_accuracy=0.997                                                                     |     |      |      |      |      |  |     |      | 3   |   |   |
| cb5125_c34/f1p0/1890                                                                                                 | gnl BL_ORD_ID 43453                      cb5125_c17/f1p2/2087<br>isoform=cb5125_c17;full_length_coverage=1;non_full_length_coverage=2;isoform_length=2087;expected_accuracy=0.998       | 1   | 1145 | 1144 | 1780 | 67   |  | 122 | 1412 | 204 | 0 | 6 |
| cb8564_c84381/f1p0/2854                                                                                              | gnl BL_ORD_ID 56971   cb8564_c78998/f1p0/3377<br>isoform=cb8564_c84381;full_length_coverage=1;non_full_length_coverage=0;isoform_length=2854;expected_accuracy=0.992                    | 1   | 1944 | 1943 | 2854 | 1    |  | 193 | 2473 | 338 | 9 | 6 |
| cb1467_c1/f1p1/4278                                                                                                  | gnl BL_ORD_ID 63644   cb1467_c5/f1p0/5220<br>isoform=cb1467_c1;full_length_coverage=2;non_full_length_coverage=1;isoform_length=2486;expected_accuracy=0.996                            | 489 | 4286 | 78   | 491  | 1092 |  | 488 | 3    | 416 | 9 |   |
| cb7795_c1/f2p1/2486                                                                                                  | gnl BL_ORD_ID 6861                      cb7795_c2/f1p0/3536<br>isoform=cb7795_c2;full_length_coverage=1;non_full_length_coverage=0;isoform_length=3536;expected_accuracy=0.996          | 1   | 2059 | 2057 | 2449 | 23   |  | 208 | 3143 | 353 | 3 | 4 |
| cb2687_c4/f1p0/2406                                                                                                  | gnl BL_ORD_ID 38801                      cb2687_c1/f1p0/3839<br>isoform=cb2687_c1;full_length_coverage=1;non_full_length_coverage=0;isoform_length=3839;expected_accuracy=1.000         | 117 | 1989 | 1989 | 2414 | 1    |  | 187 | 3333 | 375 | 2 | 8 |
| cb18456_c1776/f1p0/1211                                                                                              | gnl BL_ORD_ID 34562                      cb18456_c1614/f2p5/1371<br>isoform=cb18456_c1614;full_length_coverage=2;non_full_length_coverage=5;isoform_length=1371;expected_accuracy=1.000 | 280 | 1214 | 9    | 285  | 384  |  | 131 | 2    | 272 | 8 |   |
| cb8564_c180116/f1p0/2944                                                                                             | gnl BL_ORD_ID 56764   cb8564_c70795/f1p0/3769<br>isoform=cb8564_c180116;full_length_coverage=1;non_full_length_coverage=0;isoform_length=2944;expected_accuracy=1.000                   | 22  | 2522 | 2520 | 2944 | 34   |  | 253 | 2763 | 318 |   |   |

|                                                                                                                                                  |                                                                                                                                                                                                           |     |      |      |      |     |      |      |      |
|--------------------------------------------------------------------------------------------------------------------------------------------------|-----------------------------------------------------------------------------------------------------------------------------------------------------------------------------------------------------------|-----|------|------|------|-----|------|------|------|
| isoform=cb8564_c180116;full_length_coverage=1;non_full_length_coverage=0;isoform_length=2944;expected_accuracy=0.996<br>cb8564_c145335/f3p0/1964 |                                                                                                                                                                                                           |     |      |      |      |     |      | 4    | 3    |
| isoform=cb8564_c145335;full_length_coverage=3;non_full_length_coverage=0;isoform_length=1964;expected_accuracy=0.999<br>cb8564_c77701/f1p0/2478  | gnl BL_ORD_ID 53375 cb8564_c123599/f1p0/2339                                                                                                                                                              | 136 | 1964 | 1    | 133  | 431 | 2259 | 1    | 133  |
| isoform=cb8564_c77701;full_length_coverage=1;non_full_length_coverage=0;isoform_length=2478;expected_accuracy=0.997<br>cb8564_c47522/f1p0/2954   | gnl BL_ORD_ID 55735 cb8564_c5247/f1p0/2805                                                                                                                                                                | 15  | 2077 | 2074 | 2478 | 22  | 2077 | 2319 | 2724 |
| cb8564_c107877/f2p1/3829                                                                                                                         | gnl BL_ORD_ID 16879 cb8564_c48606/f1p1/3308<br>isoform=cb8564_c48606;full_length_coverage=1;non_full_length_coverage=1;isoform_length=3308;expected_accuracy=0.998                                        | 1   | 2132 | 2128 | 2849 | 1   | 2151 | 2587 | 3308 |
| isoform=cb8564_c107877;full_length_coverage=2;non_full_length_coverage=1;isoform_length=3829;expected_accuracy=1.000<br>cb8564_c128609/f1p0/3058 | gnl BL_ORD_ID 16294 cb8564_c70697/f1p0/4245<br>isoform=cb8564_c70697;full_length_coverage=1;non_full_length_coverage=0;isoform_length=4245;expected_accuracy=0.993                                        | 1   | 2732 | 2730 | 3829 | 213 | 2954 | 3120 | 4220 |
| isoform=cb8564_c128609;full_length_coverage=1;non_full_length_coverage=0;isoform_length=3058;expected_accuracy=0.996<br>cb7837_c4/f1p0/2386      | gnl BL_ORD_ID 54634 cb8564_c128804/f1p0/3259<br>gnl BL_ORD_ID 7423 cb7837_c1/f2p0/2384<br>isoform=cb7837_c1;full_length_coverage=2;non_full_length_coverage=0;isoform_length=2384;expected_accuracy=0.996 | 1   | 2766 | 2767 | 3018 | 36  | 2798 | 2970 | 3222 |
| cb7837_c4/f1p0/2386                                                                                                                              | gnl BL_ORD_ID 7423 cb7837_c1/f2p0/2384<br>isoform=cb7837_c1;full_length_coverage=2;non_full_length_coverage=0;isoform_length=2384;expected_accuracy=0.996                                                 | 158 | 2270 | 1    | 158  | 272 | 2382 | 5    | 162  |

|                          |                                                                                                                                                                                                                                                                                                 |     |      |      |      |     |      |      |      |
|--------------------------|-------------------------------------------------------------------------------------------------------------------------------------------------------------------------------------------------------------------------------------------------------------------------------------------------|-----|------|------|------|-----|------|------|------|
| cb12714_c29/f1p2/1583    | cy=0.992<br>gnl BL_ORD_ID 13093      cb8564_c177392/f1p0/2423<br>isoform=cb8564_c177392;full_length_coverage=1;non_full_length_coverage=0;isoform_length=2423;expected_accuracy=0.996                                                                                                           | 1   | 1296 | 1293 | 1543 | 1   | 1296 | 2173 | 2423 |
| cb8564_c108344/f8p1/2362 | isoform=cb8564_c108344;full_length_coverage=8;non_full_length_coverage=1;isoform_length=2362;expected_accuracy=1.000<br>gnl BL_ORD_ID 55987      cb8564_c51257/f1p0/4656                                                                                                                        | 12  | 1613 | 1612 | 2325 | 1   | 1613 | 3621 | 4334 |
| cb8564_c188193/f1p0/2849 | isoform=cb8564_c188193;full_length_coverage=1;non_full_length_coverage=0;isoform_length=2849;expected_accuracy=0.997<br>gnl BL_ORD_ID 16879      cb8564_c48606/f1p1/3308<br>isoform=cb8564_c48606;full_length_coverage=1;non_full_length_coverage=1;isoform_length=3308;expected_accuracy=0.998 | 1   | 2132 | 2128 | 2849 | 1   | 2132 | 2587 | 3308 |
| cb8564_c43779/f1p0/3021  | isoform=cb8564_c43779;full_length_coverage=1;non_full_length_coverage=0;isoform_length=3021;expected_accuracy=0.993<br>gnl BL_ORD_ID 15924      cb8564_c52804/f1p5/3221<br>isoform=cb8564_c52804;full_length_coverage=1;non_full_length_coverage=5;isoform_length=3221;expected_accuracy=0.999  | 1   | 2344 | 2345 | 3021 | 1   | 2344 | 2499 | 3175 |
| cb649_c18/f1p1/3876      | gnl BL_ORD_ID 4016      cb649_c21/f1p0/4098<br>isoform=cb649_c21;full_length_coverage=1;non_full_length_coverage=0;isoform_length=4098;expected_accuracy=0.990                                                                                                                                  | 265 | 3847 | 1    | 265  | 445 | 4035 | 57   | 322  |
| cb6277_c7/f1p0/2614      | gnl BL_ORD_ID 4562      cb6277_c30/f4p0/2856<br>isoform=cb6277_c7;full_length_coverage=1;non_full_length_coverage=0;isoform_length=2614;expected_accuracy=0.996<br>isoform=cb6277_c30;full_length_coverage=4;non_full_length_coverage=0;isoform_length=2856;expected_accuracy=1.000             | 1   | 1457 | 1459 | 2614 | 113 | 1457 | 1703 | 2855 |
| cb8564_c123270/f1p0/1927 | gnl BL_ORD_ID 54874      cb8564_c3238/f1p0/2188                                                                                                                                                                                                                                                 | 245 | 1812 | 55   | 245  | 507 | 207  | 22   | 209  |

|                                                                                                                     |                                                                                                                      |                          |      |      |      |      |      |     |      |     |
|---------------------------------------------------------------------------------------------------------------------|----------------------------------------------------------------------------------------------------------------------|--------------------------|------|------|------|------|------|-----|------|-----|
| cb8564_c9136/f9p5/2606                                                                                              |                                                                                                                      |                          |      |      |      |      |      | 2   |      |     |
| isoform=cb8564_c9136;full_length_coverage=9;non_full_length_coverage=5;isoform_length=2606;expected_accuracy=1.000  | gnl BL_ORD_ID 53954                                                                                                  | cb8564_c15976/f1p0/2695  | 1052 | 2524 | 1    | 1055 | 1158 | 263 | 2    | 105 |
| cb6204_c6/f1p1/2162                                                                                                 | gnl BL_ORD_ID 4437                                                                                                   | cb6204_c9/f1p3/2742      |      |      |      |      |      |     |      |     |
| isoform=cb6204_c6;full_length_coverage=1;non_full_length_coverage=1;isoform_length=2162;expected_accuracy=1.000     | isoform=cb6204_c9;full_length_coverage=1;non_full_length_coverage=3;isoform_length=2742;expected_accuracy=0.991      |                          | 11   | 1249 | 1244 | 2162 | 1    | 123 | 1556 | 247 |
| cb15584_c0/f3p0/1259                                                                                                | gnl BL_ORD_ID 64762                                                                                                  | cb15584_c2/f1p0/1708     | 371  | 1226 | 7    | 371  | 856  | 171 | 20   | 375 |
| isoform=cb15584_c0;full_length_coverage=3;non_full_length_coverage=0;isoform_length=1259;expected_accuracy=0.992    |                                                                                                                      |                          |      |      |      |      |      | 2   |      |     |
| cb1489_c2/f1p0/3842                                                                                                 | gnl BL_ORD_ID 68232                                                                                                  | cb1945_c14/f1p2/3923     | 106  | 3607 | 3607 | 3869 | 3904 | 403 | 295  | 33  |
| cb8564_c91920/f1p0/2089                                                                                             | gnl BL_ORD_ID 57938                                                                                                  | cb8564_c84460/f1p0/2544  | 581  | 2080 | 64   | 581  | 911  | 241 | 1    | 517 |
| cb12972_c5/f2p0/1545                                                                                                | gnl BL_ORD_ID 15126                                                                                                  | cb8564_c2621/f1p1/2401   |      |      |      |      |      | 0   |      |     |
| isoform=cb12972_c5;full_length_coverage=2;non_full_length_coverage=0;isoform_length=1545;expected_accuracy=1.000    | isoform=cb8564_c2621;full_length_coverage=1;non_full_length_coverage=1;isoform_length=2401;expected_accuracy=1.000   |                          | 206  | 1545 | 9    | 208  | 1020 | 235 | 1    | 200 |
| cb8564_c21767/f1p1/2839                                                                                             | gnl BL_ORD_ID 12828                                                                                                  | cb8564_c171649/f2p1/3023 |      |      |      |      |      |     |      |     |
| isoform=cb8564_c21767;full_length_coverage=1;non_full_length_coverage=1;isoform_length=2839;expected_accuracy=0.996 | isoform=cb8564_c171649;full_length_coverage=2;non_full_length_coverage=1;isoform_length=3023;expected_accuracy=0.994 |                          | 1040 | 2839 | 1    | 1040 | 1217 | 302 | 32   | 107 |
| cb4528_c30/f1p0/1646                                                                                                | gnl BL_ORD_ID 42120                                                                                                  | cb4528_c39/f1p0/2046     | 1    | 1425 | 1423 | 1566 | 171  | 159 | 1903 | 204 |
|                                                                                                                     | isoform=cb4528_c39;full_length_coverage=1;non_full_length_coverage=1;isoform_length=2046;expected_accuracy=0.994     |                          |      |      |      |      |      | 5   |      | 6   |



|                                                                                                                                                  |                                                                                                                                                                           |     |      |      |      |      |      |      |      |
|--------------------------------------------------------------------------------------------------------------------------------------------------|---------------------------------------------------------------------------------------------------------------------------------------------------------------------------|-----|------|------|------|------|------|------|------|
| cb8564_c186967/f1p0/2513<br>isoform=cb8564_c186967;full_length_coverage=1;non_full_length_coverage=0;isoform_length=2513;expected_accuracy=0.998 | gnl BL_ORD_ID 13313      cb8564_c188075/f1p2/2904<br>isoform=cb8564_c188075;full_length_coverage=1;non_full_length_coverage=2;isoform_length=2904;expected_accuracy=0.996 | 1   | 1942 | 1938 | 2513 | 40   | 1983 | 2274 | 2850 |
| cb5755_c9/f1p0/2841                                                                                                                              | gnl BL_ORD_ID 45433      cb5755_c3/f1p0/2933<br>isoform=cb5755_c3;full_length_coverage=1;non_full_length_coverage=0;isoform_length=2933;expected_accuracy=0.993           | 1   | 1495 | 1493 | 2769 | 5    | 1496 | 1632 | 2933 |
| cb8564_c46562/f2p3/3196<br>isoform=cb8564_c46562;full_length_coverage=2;non_full_length_coverage=3;isoform_length=3196;expected_accuracy=0.995   | gnl BL_ORD_ID 55939      cb8564_c49630/f1p4/3487                                                                                                                          | 16  | 2940 | 2940 | 3189 | 8    | 2913 | 3243 | 3493 |
| cb2138_c7/f2p0/1767<br>isoform=cb2138_c7;full_length_coverage=2;non_full_length_coverage=0;isoform_length=1767;expected_accuracy=1.000           | gnl BL_ORD_ID 34570      cb2138_c3/f1p0/2395<br>isoform=cb2138_c3;full_length_coverage=1;non_full_length_coverage=0;isoform_length=2395;expected_accuracy=0.997           | 216 | 1767 | 5    | 220  | 818  | 2369 | 3    | 219  |
| cb2527_c19/f1p0/2292<br>isoform=cb2527_c19;full_length_coverage=1;non_full_length_coverage=0;isoform_length=2292;expected_accuracy=0.997         | gnl BL_ORD_ID 69796      cb2527_c31/f1p1/3358                                                                                                                             | 132 | 2248 | 1    | 136  | 1222 | 3339 | 160  | 288  |
| cb5909_c2/f3p0/1152<br>isoform=cb5909_c2;full_length_coverage=3;non_full_length_coverage=0;isoform_length=1152;expected_accuracy=0.997           | gnl BL_ORD_ID 46383      cb5909_c4/f2p1/3043<br>isoform=cb5909_c4;full_length_coverage=2;non_full_length_coverage=1;isoform_length=3043;expected_accuracy=0.996           | 532 | 1152 | 7    | 536  | 2418 | 3038 | 1    | 530  |
| cb18456_c1988/f1p0/1112                                                                                                                          | gnl BL_ORD_ID 69255      cb18456_c2252/f1p0/1653                                                                                                                          | 412 | 1026 | 5    | 416  | 728  | 1340 | 9    | 423  |



|                                                                                                                                                                  |                                                                                                                                                                     |     |      |      |      |     |          |      |          |
|------------------------------------------------------------------------------------------------------------------------------------------------------------------|---------------------------------------------------------------------------------------------------------------------------------------------------------------------|-----|------|------|------|-----|----------|------|----------|
| cb2733_c21/f1p0/1180<br>isoform=cb2733_c21;full_length_coverage=1;non_full_length_coverage=0;isoform_length=1180;expected_accuracy=1.000                         | gnl BL_ORD_ID 39010      cb2733_c26/f22p0/1425<br>isoform=cb2733_c26;full_length_coverage=22;non_full_length_coverage=0;isoform_length=1425;expected_accuracy=1.000 | 115 | 1180 | 1    | 115  | 281 | 134<br>6 | 21   | 138      |
| cb2831_c26/f1p0/2685<br>cb18649_c2/f1p0/3942<br>isoform=cb18649_c2;full_length_coverage=1;non_full_length_coverage=0;isoform_length=3942;expected_accuracy=0.993 | gnl BL_ORD_ID 68914      cb2831_c15/f1p0/3921<br>gnl BL_ORD_ID 67913      cb18649_c3/f1p0/5011                                                                      | 1   | 2172 | 2173 | 2480 | 70  | 223<br>0 | 3098 | 3411     |
| cb8564_c40764/f1p0/2563<br>isoform=cb8564_c40764;full_length_coverage=1;non_full_length_coverage=0;isoform_length=2563;expected_accuracy=0.997                   | gnl BL_ORD_ID 56961      cb8564_c78609/f1p0/3194                                                                                                                    | 19  | 2167 | 2162 | 2563 | 45  | 219<br>1 | 2398 | 279<br>9 |
| cb322_c35/f1p0/3437<br>isoform=cb322_c35;full_length_coverage=1;non_full_length_coverage=0;isoform_length=3437;expected_accuracy=0.997                           | gnl BL_ORD_ID 69561      cb322_c28/f1p0/3948                                                                                                                        | 114 | 3432 | 1    | 119  | 510 | 381<br>5 | 140  | 258      |
| cb8564_c72639/f1p3/2409<br>isoform=cb8564_c72639;full_length_coverage=1;non_full_length_coverage=3;isoform_length=2409;expected_accuracy=0.999                   | gnl BL_ORD_ID 58004      cb8564_c86464/f1p0/2629                                                                                                                    | 288 | 2409 | 35   | 288  | 456 | 257<br>9 | 83   | 336      |
| cb3753_c4/f1p0/2624<br>isoform=cb3753_c4;full_length_coverage=1;non_full_length_coverage=0;isoform_length=2624;expected_accuracy=0.992                           | gnl BL_ORD_ID 39849      cb3753_c0/f1p0/3525<br>isoform=cb3753_c0;full_length_coverage=1;non_full_length_coverage=0;isoform_length=3525;expected_accuracy=0.991     | 13  | 1659 | 1657 | 2610 | 17  | 165<br>7 | 2219 | 318<br>2 |

|                                                                                                                                                  |                                                                                                                                                                           |      |      |      |      |      |      |      |      |
|--------------------------------------------------------------------------------------------------------------------------------------------------|---------------------------------------------------------------------------------------------------------------------------------------------------------------------------|------|------|------|------|------|------|------|------|
| cb8564_c153580/f2p1/2306<br>isoform=cb8564_c153580;full_length_coverage=2;non_full_length_coverage=1;isoform_length=2306;expected_accuracy=1.000 | gnl BL_ORD_ID 10006      cb8564_c109862/f2p0/3191<br>isoform=cb8564_c109862;full_length_coverage=2;non_full_length_coverage=0;isoform_length=3191;expected_accuracy=0.999 | 155  | 2305 | 15   | 157  | 1032 | 3176 | 35   | 168  |
| cb3449_c13/f1p2/3050<br>isoform=cb3449_c13;full_length_coverage=1;non_full_length_coverage=2;isoform_length=3050;expected_accuracy=0.993         | gnl BL_ORD_ID 40995      cb3449_c50/f83p4/3327<br>isoform=cb3449_c50;full_length_coverage=83;non_full_length_coverage=4;isoform_length=3327;expected_accuracy=1.000       | 1    | 2755 | 2752 | 3050 | 95   | 2850 | 3018 | 3311 |
| cb8564_c176017/f8p2/2488<br>isoform=cb8564_c176017;full_length_coverage=8;non_full_length_coverage=2;isoform_length=2488;expected_accuracy=1.000 | gnl BL_ORD_ID 10058      cb8564_c119283/f1p1/2611<br>isoform=cb8564_c119283;full_length_coverage=1;non_full_length_coverage=1;isoform_length=2611;expected_accuracy=0.999 | 1048 | 2474 | 1    | 1048 | 1190 | 2610 | 1    | 1046 |
| cb18456_c3761/f1p0/1206<br>isoform=cb18456_c3761;full_length_coverage=1;non_full_length_coverage=0;isoform_length=1206;expected_accuracy=0.998   | gnl BL_ORD_ID 69281      cb18456_c3828/f1p4/1353<br>isoform=cb18456_c3828;full_length_coverage=1;non_full_length_coverage=0;isoform_length=1353;expected_accuracy=0.999   | 9    | 806  | 809  | 1120 | 4    | 804  | 907  | 1217 |
| cb4935_c5/f1p0/2681<br>isoform=cb4935_c5;full_length_coverage=1;non_full_length_coverage=0;isoform_length=2681;expected_accuracy=0.998           | gnl BL_ORD_ID 72053      cb4935_c9/f1p1/3034<br>isoform=cb4935_c9;full_length_coverage=1;non_full_length_coverage=0;isoform_length=3034;expected_accuracy=0.999           | 482  | 2681 | 49   | 482  | 612  | 2811 | 1    | 434  |
| cb6277_c7/f1p0/2614<br>isoform=cb6277_c7;full_length_coverage=1;non_full_length_coverage=0;isoform_length=2614;expected_accuracy=0.996           | gnl BL_ORD_ID 3491      cb6277_c8/f1p0/2793<br>isoform=cb6277_c8;full_length_coverage=1;non_full_length_coverage=0;isoform_length=2793;expected_accuracy=0.999            | 1    | 1457 | 1459 | 2522 | 140  | 1596 | 1730 | 2793 |
| cb2873_c7/f1p4/3001<br>isoform=cb2873_c7;full_length_coverage=1;non_full_length_coverage=4;isoform_length=3001;expected_accuracy=0.999           | gnl BL_ORD_ID 68966      cb2873_c10/f1p0/3294<br>isoform=cb2873_c10;full_length_coverage=1;non_full_length_coverage=0;isoform_length=3294;expected_accuracy=0.999         | 143  | 2976 | 1    | 143  | 321  | 3155 | 44   | 181  |

|                          |                                                                                                                                                                           |      |      |      |      |      |      |      |      |
|--------------------------|---------------------------------------------------------------------------------------------------------------------------------------------------------------------------|------|------|------|------|------|------|------|------|
| cb8564_c42677/f1p0/3180  | gnl BL_ORD_ID 18852      cb8564_c84488/f1p0/3408<br>isoform=cb8564_c84488;full_length_coverage=1;non_full_length_coverage=0;isoform_length=3408;expected_accuracy=0.996   | 231  | 2842 | 21   | 231  | 790  | 3407 | 14   | 217  |
| cb12685_c3/f1p2/1466     | gnl BL_ORD_ID 9759      cb8564_c108367/f4p6/3120<br>isoform=cb8564_c108367;full_length_coverage=4;non_full_length_coverage=6;isoform_length=3120;expected_accuracy=0.999  | 1    | 1295 | 1292 | 1463 | 21   | 1315 | 2921 | 3092 |
| cb4496_c3/f1p0/3329      | gnl BL_ORD_ID 72614      cb4496_c4/f1p0/4050                                                                                                                              | 1352 | 3332 | 1    | 1354 | 1871 | 3851 | 70   | 1423 |
| cb8564_c75977/f1p0/2165  | gnl BL_ORD_ID 58077      cb8564_c88175/f1p0/4011                                                                                                                          | 1    | 1393 | 1394 | 2130 | 63   | 1455 | 3255 | 3986 |
| cb653_c12/f1p0/3754      | gnl BL_ORD_ID 5130      cb653_c9/f1p0/4025<br>isoform=cb653_c12;full_length_coverage=1;non_full_length_coverage=0;isoform_length=3754;expected_accuracy=0.995             | 195  | 3754 | 1    | 194  | 424  | 3982 | 104  | 301  |
| cb7341_c3/f1p0/1290      | gnl BL_ORD_ID 8731      cb7341_c1/f2p0/2288<br>isoform=cb7341_c3;full_length_coverage=1;non_full_length_coverage=0;isoform_length=1290;expected_accuracy=1.000            | 220  | 1286 | 41   | 220  | 1222 | 2288 | 1    | 181  |
| cb8564_c91136/f1p0/3087  | gnl BL_ORD_ID 12830      cb8564_c158006/f2p1/3461<br>isoform=cb8564_c158006;full_length_coverage=2;non_full_length_coverage=1;isoform_length=3461;expected_accuracy=0.990 | 383  | 3072 | 9    | 384  | 509  | 3197 | 4    | 376  |
| cb8564_c124042/f1p0/1795 | gnl BL_ORD_ID 27781      cb14897_c3/f1p1/1884<br>isoform=cb14897_c3;full_length_coverage=1;non_full_l                                                                     | 11   | 1293 | 1293 | 1677 | 1    | 1285 | 1492 | 1875 |



|                                                                                                                                                |                                                                                                                                                                                           |      |      |      |      |      |      |      |      |  |  |
|------------------------------------------------------------------------------------------------------------------------------------------------|-------------------------------------------------------------------------------------------------------------------------------------------------------------------------------------------|------|------|------|------|------|------|------|------|--|--|
| ngth_coverage=0;isoform_length=2680;expected_accuracy=0.995                                                                                    | ngth_coverage=0;isoform_length=3464;expected_accuracy=0.999                                                                                                                               |      |      |      |      |      |      |      |      |  |  |
| cb8564_c37361/f1p0/3076                                                                                                                        | gnl BL_ORD_ID 58037 cb8564_c87188/f1p1/3426                                                                                                                                               | 20   | 2481 | 2477 | 3070 | 127  | 2587 | 2688 | 3281 |  |  |
| cb3037_c20/f1p0/2362<br>isoform=cb3037_c20;full_length_coverage=1;non_full_length_coverage=0;isoform_length=2362;expected_accuracy=0.998       | gnl BL_ORD_ID 38434                      cb3037_c15/f1p0/3566<br>isoform=cb3037_c15;full_length_coverage=1;non_full_length_coverage=0;isoform_length=3566;expected_accuracy=0.998         | 1    | 2130 | 2126 | 2362 | 63   | 2190 | 3248 | 3483 |  |  |
| cb12_c30/f1p2/4443<br>isoform=cb12_c30;full_length_coverage=1;non_full_length_coverage=2;isoform_length=4443;expected_accuracy=0.992           | gnl BL_ORD_ID 61090 cb12_c56/f1p0/6478                                                                                                                                                    | 373  | 4384 | 1    | 373  | 2283 | 6295 | 1376 | 1753 |  |  |
| cb8564_c119362/f1p0/2391                                                                                                                       | gnl BL_ORD_ID 11724                      cb8564_c124026/f1p1/2665<br>isoform=cb8564_c124026;full_length_coverage=1;non_full_length_coverage=1;isoform_length=2665;expected_accuracy=1.000 | 15   | 1662 | 1663 | 2240 | 29   | 1677 | 2071 | 2665 |  |  |
| cb5307_c9/f1p0/2902                                                                                                                            | gnl BL_ORD_ID 44817                      cb5307_c14/f1p0/3080<br>isoform=cb5307_c14;full_length_coverage=1;non_full_length_coverage=0;isoform_length=3080;expected_accuracy=0.993         | 1204 | 2896 | 1    | 1204 | 1307 | 2998 | 1    | 1199 |  |  |
| cb18456_c1523/f3p0/1472<br>isoform=cb18456_c1523;full_length_coverage=3;non_full_length_coverage=0;isoform_length=1472;expected_accuracy=0.994 | gnl BL_ORD_ID 19097                      cb8564_c86387/f1p0/3075<br>isoform=cb8564_c86387;full_length_coverage=1;non_full_length_coverage=0;isoform_length=3075;expected_accuracy=0.995   | 224  | 1472 | 49   | 225  | 1617 | 2869 | 1    | 177  |  |  |
| cb9823_c2/f1p0/1778                                                                                                                            | gnl BL_ORD_ID 19699                      cb9823_c0/f1p0/1963<br>isoform=cb9823_c0;full_length_coverage=1;non_full_length_coverage=0;isoform_length=1963;expected_accuracy=0.995           | 1    | 1304 | 1303 | 1720 | 107  | 1413 | 1517 | 1933 |  |  |

|                         |                                                                                                                                                                                                                                            |      |      |      |      |      |          |      |          |
|-------------------------|--------------------------------------------------------------------------------------------------------------------------------------------------------------------------------------------------------------------------------------------|------|------|------|------|------|----------|------|----------|
| cb8564_c5122/f1p0/3329  | ngth_coverage=0;isoform_length=1963;expected_accuracy=0.992<br>gnl BL_ORD_ID 12581      cb8564_c148448/f2p13/3821<br>isoform=cb8564_c148448;full_length_coverage=2;non_full_length_coverage=13;isoform_length=3821;expected_accuracy=0.995 | 1067 | 3334 | 1    | 1069 | 1473 | 374<br>2 | 113  | 1181     |
| cb2493_c40/f1p0/3431    | gnl BL_ORD_ID 36784      cb2493_c80/f1p4/3679<br>isoform=cb2493_c80;full_length_coverage=1;non_full_length_coverage=4;isoform_length=3679;expected_accuracy=0.995                                                                          | 485  | 3408 | 76   | 488  | 754  | 367<br>9 | 10   | 438      |
| cb8564_c25105/f3p1/4062 | isoform=cb8564_c25105;full_length_coverage=3;non_full_length_coverage=1;isoform_length=4062;expected_accuracy=0.995<br>gnl BL_ORD_ID 53968      cb8564_c16162/f1p1/4558                                                                    | 1    | 3253 | 3252 | 4041 | 77   | 332<br>9 | 3593 | 438<br>2 |
| cb3907_c5/f1p0/2446     | isoform=cb3907_c5;full_length_coverage=1;non_full_length_coverage=0;isoform_length=2446;expected_accuracy=0.994<br>gnl BL_ORD_ID 71630      cb3907_c9/f1p0/2875                                                                            | 225  | 2446 | 1    | 225  | 470  | 269<br>1 | 26   | 254      |
| cb1960_c41/f1p1/2517    | gnl BL_ORD_ID 66556      cb1960_c58/f1p0/2977                                                                                                                                                                                              | 1    | 2123 | 2120 | 2503 | 30   | 212<br>2 | 2520 | 290<br>3 |
| cb7209_c12/f1p0/2362    | gnl BL_ORD_ID 7147      cb7209_c20/f1p1/2581<br>isoform=cb7209_c20;full_length_coverage=1;non_full_length_coverage=1;isoform_length=2581;expected_accuracy=0.996                                                                           | 212  | 2366 | 1    | 211  | 422  | 257<br>5 | 93   | 313      |
| cb17884_c1/f1p0/1875    | gnl BL_ORD_ID 17831      cb8564_c84290/f1p0/3355<br>isoform=cb8564_c84290;full_length_coverage=1;non_full_length_coverage=0;isoform_length=3355;expected_accuracy=0.995                                                                    | 391  | 1881 | 75   | 394  | 1872 | 335<br>5 | 86   | 407      |

|                         |                                                                                                                                                                                                                                                                                                                                                                                                       |      |      |      |      |      |          |      |          |
|-------------------------|-------------------------------------------------------------------------------------------------------------------------------------------------------------------------------------------------------------------------------------------------------------------------------------------------------------------------------------------------------------------------------------------------------|------|------|------|------|------|----------|------|----------|
| cb7798_c5/f1p0/1815     | <p>ll_length_coverage=0;isoform_length=3355;expected_accuracy=0.998</p> <p>gnl BL_ORD_ID 8084                      cb7798_c1/f1p0/2530</p> <p>isoform=cb7798_c1;full_length_coverage=1;non_full_length_coverage=0;isoform_length=2530;expected_accuracy=0.996</p>                                                                                                                                     | 1    | 1452 | 1450 | 1809 | 151  | 160<br>2 | 2166 | 252<br>5 |
| cb8564_c42654/f1p1/2906 | <p>gnl BL_ORD_ID 16705                      cb8564_c53880/f1p0/3484</p> <p>isoform=cb8564_c42654;full_length_coverage=1;non_full_length_coverage=1;isoform_length=2906;expected_accuracy=0.990</p> <p>gnl BL_ORD_ID 16705                      cb8564_c53880/f1p0/3484</p> <p>isoform=cb8564_c53880;full_length_coverage=1;non_full_length_coverage=0;isoform_length=3484;expected_accuracy=0.996</p> | 1031 | 2824 | 1    | 1032 | 1672 | 346<br>0 | 1    | 105<br>6 |
| cb8564_c43779/f1p0/3021 | <p>gnl BL_ORD_ID 16447                      cb8564_c47202/f1p0/3195</p> <p>isoform=cb8564_c43779;full_length_coverage=1;non_full_length_coverage=0;isoform_length=3021;expected_accuracy=0.993</p> <p>gnl BL_ORD_ID 16447                      cb8564_c47202/f1p0/3195</p> <p>isoform=cb8564_c47202;full_length_coverage=1;non_full_length_coverage=0;isoform_length=3195;expected_accuracy=0.996</p> | 1    | 2344 | 2345 | 3018 | 1    | 234<br>5 | 2501 | 319<br>5 |
| cb500_c19/f1p1/3637     | <p>gnl BL_ORD_ID 72252                      cb500_c85/f1p1/5346</p> <p>isoform=cb500_c19;full_length_coverage=1;non_full_length_coverage=1;isoform_length=3637;expected_accuracy=0.996</p> <p>gnl BL_ORD_ID 72252                      cb500_c85/f1p1/5346</p>                                                                                                                                        | 176  | 3613 | 1    | 177  | 1883 | 532<br>2 | 764  | 941      |
| cb18646_c2/f1p5/6412    | <p>gnl BL_ORD_ID 34399                      cb18646_c1/f2p2/6581</p> <p>isoform=cb18646_c2;full_length_coverage=1;non_full_length_coverage=5;isoform_length=6412;expected_accuracy=0.997</p> <p>gnl BL_ORD_ID 34399                      cb18646_c1/f2p2/6581</p> <p>isoform=cb18646_c1;full_length_coverage=2;non_full_length_coverage=2;isoform_length=6581;expected_accuracy=0.999</p>             | 23   | 6140 | 6139 | 6412 | 3    | 612<br>0 | 6227 | 650<br>4 |
| cb10263_c1/f1p0/1823    | <p>gnl BL_ORD_ID 19715                      cb8960_c0/f3p0/1872</p> <p>isoform=cb8960_c0;full_length_coverage=3;non_full_length_coverage=0;isoform_length=1872;expected_accuracy=1.000</p> <p>gnl BL_ORD_ID 19715                      cb8960_c0/f3p0/1872</p> <p>isoform=cb8960_c0;full_length_coverage=3;non_full_length_coverage=0;isoform_length=1872;expected_accuracy=1.000</p>                 | 100  | 1621 | 1    | 103  | 330  | 185<br>2 | 114  | 218      |

|                          |                                                                                                                                                                          |     |      |      |      |     |      |      |      |
|--------------------------|--------------------------------------------------------------------------------------------------------------------------------------------------------------------------|-----|------|------|------|-----|------|------|------|
| cb8564_c5070/f1p0/2861   | gnl BL_ORD_ID 11412 cb8564_c147227/f33p12/2882<br>isoform=cb8564_c147227;full_length_coverage=33;non_full_length_coverage=12;isoform_length=2882;expected_accuracy=1.000 | 10  | 1660 | 1659 | 2831 | 58  | 1708 | 1601 | 2772 |
| cb8564_c49540/f1p2/2982  | gnl BL_ORD_ID 56386 cb8564_c75670/f1p2/3240                                                                                                                              | 750 | 2973 | 76   | 747  | 855 | 3077 | 1    | 672  |
| cb2825_c1/f4p1/2045      | gnl BL_ORD_ID 38762 cb2825_c3/f2p1/2885<br>isoform=cb2825_c1;full_length_coverage=4;non_full_length_coverage=1;isoform_length=2045;expected_accuracy=1.000               | 138 | 2045 | 1    | 139  | 966 | 2881 | 22   | 157  |
| cb8564_c130435/f1p3/3226 | gnl BL_ORD_ID 55939 cb8564_c49630/f1p4/3487<br>isoform=cb8564_c130435;full_length_coverage=1;non_full_length_coverage=3;isoform_length=3226;expected_accuracy=0.994      | 13  | 2943 | 2943 | 3201 | 7   | 2913 | 3243 | 3493 |
| cb8564_c180116/f1p0/2944 | gnl BL_ORD_ID 16886 cb8564_c50727/f1p0/3201<br>isoform=cb8564_c180116;full_length_coverage=1;non_full_length_coverage=0;isoform_length=2944;expected_accuracy=0.996      | 2   | 2522 | 2520 | 2944 | 1   | 2544 | 2773 | 3197 |
| cb8564_c49562/f1p0/2838  | gnl BL_ORD_ID 56764 cb8564_c70795/f1p0/3769<br>isoform=cb8564_c49562;full_length_coverage=1;non_full_length_coverage=0;isoform_length=2838;expected_accuracy=0.995       | 23  | 2331 | 2327 | 2838 | 34  | 2342 | 2674 | 3185 |
| cb10514_c1/f2p0/1767     | gnl BL_ORD_ID 48607 cb10514_c2/f1p0/1908<br>isoform=cb10514_c1;full_length_coverage=2;non_full_length_coverage=0;isoform_length=1767;expected_accuracy=0.999             | 1   | 1142 | 1141 | 1767 | 15  | 1150 | 1258 | 1884 |



|                                                                                                                                            |                                                                                                                                                                           |     |      |      |      |      |          |      |          |
|--------------------------------------------------------------------------------------------------------------------------------------------|---------------------------------------------------------------------------------------------------------------------------------------------------------------------------|-----|------|------|------|------|----------|------|----------|
| cb18058_c1/f1p0/1872<br>isoform=cb18058_c1;full_length_coverage=1;non_full_length_coverage=0;isoform_length=1872;expected_accuracy=0.999   | gnl BL_ORD_ID 16779      cb8564_c77829/f1p1/2227<br>isoform=cb8564_c77829;full_length_coverage=1;non_full_length_coverage=1;isoform_length=2227;expected_accuracy=0.999   | 205 | 1844 | 3    | 209  | 590  | 222<br>7 | 1    | 206      |
| cb12714_c29/f1p2/1583                                                                                                                      | gnl BL_ORD_ID 52776      cb8564_c13457/f1p1/2717                                                                                                                          | 1   | 1296 | 1293 | 1589 | 1    | 129<br>6 | 2410 | 270<br>6 |
| cb12893_c39/f1p0/1097<br>isoform=cb12893_c39;full_length_coverage=1;non_full_length_coverage=0;isoform_length=1097;expected_accuracy=0.996 | gnl BL_ORD_ID 26178      cb12893_c16/f1p5/1413<br>isoform=cb12893_c16;full_length_coverage=1;non_full_length_coverage=5;isoform_length=1413;expected_accuracy=0.998       | 234 | 1095 | 4    | 239  | 490  | 136<br>5 | 1    | 235      |
| cb8564_c125603/f1p0/2366                                                                                                                   | gnl BL_ORD_ID 12485      cb8564_c122733/f1p0/3383<br>isoform=cb8564_c122733;full_length_coverage=1;non_full_length_coverage=0;isoform_length=3383;expected_accuracy=0.993 | 274 | 2372 | 30   | 276  | 1289 | 338<br>3 | 26   | 270      |
| cb8564_c127997/f1p3/2802                                                                                                                   | gnl BL_ORD_ID 13176      cb8564_c15957/f1p0/2838<br>isoform=cb8564_c15957;full_length_coverage=1;non_full_length_coverage=0;isoform_length=2838;expected_accuracy=0.994   | 1   | 1695 | 1694 | 2746 | 1    | 168<br>4 | 1792 | 283<br>8 |
| cb2356_c20/f1p2/3214<br>isoform=cb2356_c20;full_length_coverage=1;non_full_length_coverage=2;isoform_length=3214;expected_accuracy=1.000   | gnl BL_ORD_ID 38122      cb2356_c8/f1p0/3478<br>isoform=cb2356_c8;full_length_coverage=1;non_full_length_coverage=0;isoform_length=3478;expected_accuracy=0.995           | 1   | 2372 | 2369 | 3147 | 254  | 259<br>6 | 2700 | 347<br>8 |
| cb1992_c44/f5p1/2983<br>isoform=cb1992_c44;full_length_coverage=5;non_full_length_coverage=1;isoform_length=2983;expected_accuracy=1.000   | gnl BL_ORD_ID 36459      cb1992_c8/f3p0/3590<br>isoform=cb1992_c8;full_length_coverage=3;non_full_length_coverage=0;isoform_length=3590;expected_accuracy=0.999           | 23  | 2452 | 2450 | 2983 | 1    | 243<br>0 | 3055 | 358<br>9 |

|                                                                                                                                              |                                                                                                                                                                         |     |      |      |      |     |          |      |          |
|----------------------------------------------------------------------------------------------------------------------------------------------|-------------------------------------------------------------------------------------------------------------------------------------------------------------------------|-----|------|------|------|-----|----------|------|----------|
| cb8800_c4/f1p0/1370<br>isoform=cb8800_c4;full_length_coverage=1;non_full_length_coverage=0;isoform_length=1370;expected_accuracy=0.992       | gnl BL_ORD_ID 19216      cb8800_c3/f1p0/2213<br>isoform=cb8800_c3;full_length_coverage=1;non_full_length_coverage=0;isoform_length=2213;expected_accuracy=0.993         | 1   | 1057 | 1052 | 1370 | 689 | 174<br>4 | 1890 | 2211     |
| cb5679_c4/f1p0/1908<br>isoform=cb5679_c4;full_length_coverage=1;non_full_length_coverage=0;isoform_length=1908;expected_accuracy=0.995       | gnl BL_ORD_ID 47066      cb5679_c1/f1p0/2272<br>isoform=cb5679_c1;full_length_coverage=1;non_full_length_coverage=0;isoform_length=2272;expected_accuracy=1.000         | 1   | 1286 | 1287 | 1902 | 43  | 133<br>7 | 1660 | 227<br>2 |
| cb8564_c3634/f2p0/3601<br>isoform=cb8564_c3634;full_length_coverage=2;non_full_length_coverage=0;isoform_length=3601;expected_accuracy=0.999 | gnl BL_ORD_ID 15111      cb8564_c46812/f3p0/4253<br>isoform=cb8564_c46812;full_length_coverage=3;non_full_length_coverage=0;isoform_length=4253;expected_accuracy=0.993 | 1   | 2017 | 2015 | 3586 | 103 | 212<br>0 | 2682 | 425<br>0 |
| cb6221_c23/f2p1/1839<br>isoform=cb6221_c23;full_length_coverage=2;non_full_length_coverage=1;isoform_length=1839;expected_accuracy=0.999     | gnl BL_ORD_ID 49542      cb6221_c14/f1p0/2546                                                                                                                           | 186 | 1839 | 4    | 186  | 756 | 2411     | 3    | 185      |
| cb4861_c2/f1p0/2642                                                                                                                          | gnl BL_ORD_ID 72035      cb4861_c0/f1p0/3233                                                                                                                            | 1   | 2057 | 2054 | 2538 | 104 | 213<br>9 | 2733 | 321<br>8 |
| cb8564_c4742/f1p0/2505<br>isoform=cb8564_c4742;full_length_coverage=1;non_full_length_coverage=0;isoform_length=2505;expected_accuracy=0.999 | gnl BL_ORD_ID 14698      cb8564_c4069/f2p0/2782<br>isoform=cb8564_c4069;full_length_coverage=2;non_full_length_coverage=0;isoform_length=2782;expected_accuracy=0.995   | 1   | 2086 | 2084 | 2473 | 1   | 210<br>3 | 2393 | 278<br>2 |
| cb11147_c1/f1p0/1304<br>isoform=cb11147_c1;full_length_coverage=1;non_full_length_coverage=0;isoform_length=1304;expected_accuracy=1.000     | gnl BL_ORD_ID 49209      cb11147_c2/f1p0/2053                                                                                                                           | 128 | 1304 | 13   | 132  | 715 | 189<br>7 | 2    | 121      |

|                                                                                                                                                  |                                                                                                                                                                  |     |      |      |      |      |      |      |      |
|--------------------------------------------------------------------------------------------------------------------------------------------------|------------------------------------------------------------------------------------------------------------------------------------------------------------------|-----|------|------|------|------|------|------|------|
| cb10255_c12/f1p0/1559<br>isoform=cb10255_c12;full_length_coverage=1;non_full_length_coverage=0;isoform_length=1559;expected_accuracy=0.992       | gnl BL_ORD_ID 48295 cb10255_c18/f1p0/1844                                                                                                                        | 144 | 1559 | 1    | 147  | 380  | 1779 | 96   | 242  |
| cb10784_c5/f4p0/1248<br>isoform=cb10784_c5;full_length_coverage=4;non_full_length_coverage=0;isoform_length=1248;expected_accuracy=0.999         | gnl BL_ORD_ID 324 cb10784_c2/f1p0/2941<br>isoform=cb10784_c2;full_length_coverage=1;non_full_length_coverage=0;isoform_length=2941;expected_accuracy=0.992       | 127 | 1248 | 8    | 125  | 1800 | 2920 | 1    | 118  |
| cb6221_c19/f1p0/1943                                                                                                                             | gnl BL_ORD_ID 49543 cb6221_c15/f1p0/2712                                                                                                                         | 247 | 1873 | 60   | 247  | 900  | 2529 | 1    | 189  |
| cb124_c43/f1p0/2759                                                                                                                              | gnl BL_ORD_ID 59063 cb124_c36/f1p0/2750                                                                                                                          | 234 | 2490 | 13   | 233  | 478  | 2734 | 12   | 232  |
| cb3483_c14/f1p0/2857                                                                                                                             | gnl BL_ORD_ID 41441 cb3483_c26/f7p1/2926<br>isoform=cb3483_c26;full_length_coverage=7;non_full_length_coverage=1;isoform_length=2926;expected_accuracy=1.000     | 161 | 2772 | 10   | 163  | 313  | 2923 | 2    | 157  |
| cb8564_c10064/f5p11/3897<br>isoform=cb8564_c10064;full_length_coverage=5;non_full_length_coverage=11;isoform_length=3897;expected_accuracy=0.996 | gnl BL_ORD_ID 19170 cb8564_c9757/f2p7/4230<br>isoform=cb8564_c9757;full_length_coverage=2;non_full_length_coverage=7;isoform_length=4230;expected_accuracy=0.999 | 1   | 3134 | 3135 | 3792 | 30   | 3162 | 3573 | 4230 |
| cb14664_c3/f1p0/1551<br>isoform=cb14664_c3;full_length_coverage=1;non_full_length_coverage=0;isoform_length=1551;expected_accuracy=1.000         | gnl BL_ORD_ID 52959 cb8564_c113186/f1p0/2216                                                                                                                     | 162 | 1551 | 55   | 167  | 692  | 2081 | 107  | 219  |
| cb2737_c42/f1p0/2881                                                                                                                             | gnl BL_ORD_ID 68777 cb2737_c19/f1p0/3583                                                                                                                         | 1   | 1427 | 1425 | 2632 | 779  | 2205 | 2337 | 3544 |

|                                                                                                                                                |                                                                                                                                                                         |      |      |      |      |      |      |      |      |
|------------------------------------------------------------------------------------------------------------------------------------------------|-------------------------------------------------------------------------------------------------------------------------------------------------------------------------|------|------|------|------|------|------|------|------|
| cb293_c6/f1p0/3758<br>isoform=cb293_c6;full_length_coverage=1;non_full_length_coverage=0;isoform_length=3758;expected_accuracy=0.997           | gnl BL_ORD_ID 37297      cb293_c2/f1p1/4354<br>isoform=cb293_c2;full_length_coverage=1;non_full_length_coverage=1;isoform_length=4354;expected_accuracy=0.994           | 1    | 1906 | 1903 | 3718 | 32   | 1936 | 2554 | 4354 |
| cb8564_c53418/f1p0/2602<br>isoform=cb8564_c53418;full_length_coverage=1;non_full_length_coverage=0;isoform_length=2602;expected_accuracy=0.991 | gnl BL_ORD_ID 55614      cb8564_c46839/f1p1/2758                                                                                                                        | 1171 | 2544 | 1    | 1168 | 1279 | 2653 | 2    | 1170 |
| cb14634_c52/f1p1/4305                                                                                                                          | gnl BL_ORD_ID 63292      cb14634_c71/f1p0/5060                                                                                                                          | 1    | 2658 | 2653 | 4320 | 59   | 2717 | 2835 | 4502 |
| cb8564_c38947/f1p0/2650<br>isoform=cb8564_c38947;full_length_coverage=1;non_full_length_coverage=0;isoform_length=2650;expected_accuracy=0.996 | gnl BL_ORD_ID 15154      cb8564_c32509/f1p1/2880<br>isoform=cb8564_c32509;full_length_coverage=1;non_full_length_coverage=1;isoform_length=2880;expected_accuracy=0.991 | 11   | 1441 | 1436 | 2625 | 2    | 1454 | 1673 | 2877 |
| cb8417_c0/f14p1/2119<br>isoform=cb8417_c0;full_length_coverage=14;non_full_length_coverage=1;isoform_length=2119;expected_accuracy=1.000       | gnl BL_ORD_ID 51937      cb8417_c8/f1p1/2695                                                                                                                            | 542  | 2119 | 74   | 543  | 999  | 2576 | 3    | 472  |
| cb8564_c45787/f1p3/3310                                                                                                                        | gnl BL_ORD_ID 55939      cb8564_c49630/f1p4/3487                                                                                                                        | 101  | 3010 | 3010 | 3260 | 3    | 2913 | 3243 | 3493 |
| cb3309_c10/f1p1/3166                                                                                                                           | gnl BL_ORD_ID 40140      cb3309_c4/f1p1/3664<br>isoform=cb3309_c4;full_length_coverage=1;non_full_length_coverage=1;isoform_length=3664;expected_accuracy=0.995         | 1467 | 3166 | 1    | 1470 | 1906 | 3605 | 1    | 1466 |
| cb8564_c36056/f1p0/2652<br>isoform=cb8564_c36056;full_length_coverage=1;non_f                                                                  | gnl BL_ORD_ID 57289      cb8564_c89122/f1p0/3335                                                                                                                        | 248  | 2639 | 1    | 251  | 523  | 2915 | 129  | 381  |

|                                                                                                                                          |                                                                                                                                         |                      |     |      |      |      |      |      |      |      |
|------------------------------------------------------------------------------------------------------------------------------------------|-----------------------------------------------------------------------------------------------------------------------------------------|----------------------|-----|------|------|------|------|------|------|------|
| ull_length_coverage=0;isoform_length=2652;expected_accuracy=0.999                                                                        |                                                                                                                                         |                      |     |      |      |      |      |      |      |      |
| cb5583_c0/f4p0/1845<br>isoform=cb5583_c0;full_length_coverage=4;non_full_length_coverage=0;isoform_length=1845;expected_accuracy=1.000   | gnl BL_ORD_ID 46284<br>isoform=cb5583_c1;full_length_coverage=1;non_full_length_coverage=0;isoform_length=3059;expected_accuracy=0.997  | cb5583_c1/f1p0/3059  | 132 | 1780 | 1    | 132  | 1417 | 3059 | 1    | 132  |
| cb14044_c6/f1p0/1650<br>isoform=cb14044_c6;full_length_coverage=1;non_full_length_coverage=0;isoform_length=1650;expected_accuracy=0.996 | gnl BL_ORD_ID 25840<br>isoform=cb14044_c2;full_length_coverage=4;non_full_length_coverage=1;isoform_length=1883;expected_accuracy=1.000 | cb14044_c2/f4p1/1883 | 1   | 1019 | 1015 | 1650 | 1    | 1030 | 1164 | 1800 |
| cb6596_c4/f1p0/1084                                                                                                                      | gnl BL_ORD_ID 4473<br>isoform=cb6596_c0;full_length_coverage=2;non_full_length_coverage=0;isoform_length=2822;expected_accuracy=0.997   | cb6596_c0/f2p0/2822  | 105 | 1096 | 1    | 105  | 1831 | 2822 | 5    | 110  |
| cb2737_c45/f1p0/2944                                                                                                                     | gnl BL_ORD_ID 38134<br>isoform=cb2737_c22;full_length_coverage=1;non_full_length_coverage=0;isoform_length=3196;expected_accuracy=0.995 | cb2737_c22/f1p0/3196 | 1   | 1476 | 1474 | 2756 | 301  | 1763 | 1894 | 3161 |
| cb1648_c4/f10p3/2031<br>isoform=cb1648_c4;full_length_coverage=10;non_full_length_coverage=3;isoform_length=2031;expected_accuracy=1.000 | gnl BL_ORD_ID 32503<br>isoform=cb1648_c15;full_length_coverage=1;non_full_length_coverage=0;isoform_length=2133;expected_accuracy=1.000 | cb1648_c15/f1p0/2133 | 234 | 2030 | 26   | 234  | 337  | 2133 | 1    | 195  |
| cb1772_c6/f2p1/3674<br>isoform=cb1772_c6;full_length_coverage=2;non_full_length_coverage=1;isoform_length=3674;expected_accuracy=1.000   | gnl BL_ORD_ID 66372<br>cb1772_c16/f1p1/4029                                                                                             |                      | 216 | 3674 | 1    | 218  | 430  | 3901 | 44   | 246  |

|                         |                                                                                                                                                                         |     |      |      |      |      |      |      |      |
|-------------------------|-------------------------------------------------------------------------------------------------------------------------------------------------------------------------|-----|------|------|------|------|------|------|------|
| cb8564_c46939/f1p1/2926 | gnl BL_ORD_ID 13575      cb8564_c20499/f3p0/3328<br>isoform=cb8564_c20499;full_length_coverage=3;non_full_length_coverage=0;isoform_length=3328;expected_accuracy=1.000 | 1   | 2134 | 2130 | 2870 | 1    | 2144 | 2249 | 2990 |
| cb8564_c4971/f2p0/2890  | gnl BL_ORD_ID 15755      cb8564_c4970/f1p0/3133<br>isoform=cb8564_c4971;full_length_coverage=2;non_full_length_coverage=0;isoform_length=2890;expected_accuracy=1.000   | 105 | 2890 | 1    | 106  | 292  | 3051 | 5    | 111  |
| cb8564_c36689/f1p1/2368 | gnl BL_ORD_ID 55170      cb8564_c34431/f1p0/3665<br>isoform=cb8564_c36689;full_length_coverage=1;non_full_length_coverage=1;isoform_length=2368;expected_accuracy=0.991 | 1   | 1709 | 1706 | 2368 | 4    | 1712 | 2511 | 3175 |
| cb2728_c6/f1p0/2834     | gnl BL_ORD_ID 38993      cb2728_c3/f1p0/3818<br>isoform=cb2728_c6;full_length_coverage=1;non_full_length_coverage=0;isoform_length=2834;expected_accuracy=0.999         | 589 | 2834 | 7    | 593  | 1546 | 3786 | 146  | 735  |
| cb8564_c42091/f1p0/3606 | gnl BL_ORD_ID 16529      cb8564_c48301/f1p2/3934<br>isoform=cb8564_c42091;full_length_coverage=1;non_full_length_coverage=0;isoform_length=3606;expected_accuracy=0.998 | 1   | 2325 | 2324 | 3606 | 1    | 2325 | 2618 | 3905 |
| cb5125_c34/f1p0/1890    | gnl BL_ORD_ID 72116      cb5125_c21/f1p3/2083<br>isoform=cb5125_c34;full_length_coverage=1;non_full_length_coverage=0;isoform_length=1890;expected_accuracy=0.999       | 1   | 1145 | 1144 | 1780 | 34   | 1178 | 1370 | 2005 |
| cb2071_c1/f5p0/2098     | gnl BL_ORD_ID 66664      cb2071_c6/f1p0/4059<br>isoform=cb2071_c1;full_length_coverage=5;non_full_length_coverage=0;isoform_length=2098;expected_accuracy=1.000         | 1   | 1118 | 1113 | 2019 | 35   | 1158 | 3156 | 4061 |

|                                                                                                                                            |                                             |      |      |      |      |      |      |      |      |
|--------------------------------------------------------------------------------------------------------------------------------------------|---------------------------------------------|------|------|------|------|------|------|------|------|
| cb8909_c12/f1p0/1836<br>isoform=cb8909_c12;full_length_coverage=1;non_full_length_coverage=0;isoform_length=1836;expected_accuracy=1.000   | gnl BL_ORD_ID 59367 cb8909_c4/f1p0/2185     | 1    | 1624 | 1620 | 1836 | 51   | 1667 | 1768 | 1981 |
| cb3010_c5/f2p0/2793<br>isoform=cb3010_c5;full_length_coverage=2;non_full_length_coverage=0;isoform_length=2793;expected_accuracy=1.000     | gnl BL_ORD_ID 70131 cb3010_c17/f1p1/3095    | 1307 | 2793 | 1    | 1308 | 1442 | 2928 | 4    | 1311 |
| cb1585_c21/f1p1/1983<br>isoform=cb1585_c10;full_length_coverage=1;non_full_length_coverage=0;isoform_length=2444;expected_accuracy=1.000   | gnl BL_ORD_ID 27809 cb1585_c10/f1p0/2444    | 1    | 1456 | 1455 | 1953 | 17   | 1473 | 1946 | 2444 |
| cb792_c31/f1p0/3278<br>isoform=cb792_c31;full_length_coverage=1;non_full_length_coverage=0;isoform_length=3278;expected_accuracy=0.993     | gnl BL_ORD_ID 49470 cb792_c35/f1p1/3973     | 566  | 3278 | 7    | 567  | 1168 | 3887 | 6    | 569  |
| cb5270_c33/f1p0/2572<br>isoform=cb5422_c12;full_length_coverage=1;non_full_length_coverage=0;isoform_length=5493;expected_accuracy=0.993   | gnl BL_ORD_ID 73713 cb5270_c16/f1p0/2707    | 1098 | 2566 | 1    | 1097 | 1199 | 2670 | 1    | 1096 |
| cb5422_c6/f1p0/1857<br>isoform=cb8564_c87595;full_length_coverage=1;non_full_length_coverage=0;isoform_length=4323;expected_accuracy=0.997 | gnl BL_ORD_ID 45247 cb5422_c12/f1p0/5493    | 1    | 1128 | 1127 | 1788 | 234  | 1357 | 4836 | 5493 |
| cb8564_c5271/f1p0/3205                                                                                                                     | gnl BL_ORD_ID 17728 cb8564_c87595/f1p0/4323 | 259  | 3193 | 1    | 261  | 1395 | 4323 | 1    | 259  |

|                                                                                                                                          |                                                                                                                                                                         |      |      |      |      |      |      |      |      |
|------------------------------------------------------------------------------------------------------------------------------------------|-------------------------------------------------------------------------------------------------------------------------------------------------------------------------|------|------|------|------|------|------|------|------|
| cb317_c5/f1p0/3451<br>isoform=cb317_c5;full_length_coverage=1;non_full_length_coverage=0;isoform_length=3451;expected_accuracy=0.998     | gnl BL_ORD_ID 37312      cb317_c14/f1p0/4548<br>isoform=cb317_c14;full_length_coverage=1;non_full_length_coverage=0;isoform_length=4548;expected_accuracy=0.992         | 1    | 3038 | 3033 | 3317 | 28   | 3053 | 3278 | 3562 |
| cb313_c22/f1p0/3103                                                                                                                      | gnl BL_ORD_ID 38275      cb313_c7/f1p0/4354<br>isoform=cb313_c7;full_length_coverage=1;non_full_length_coverage=0;isoform_length=4354;expected_accuracy=0.994           | 1    | 1950 | 1948 | 2985 | 1    | 1945 | 3217 | 4253 |
| cb8564_c84473/f1p0/2481                                                                                                                  | gnl BL_ORD_ID 57836      cb8564_c82188/f1p1/2590                                                                                                                        | 1109 | 2426 | 1    | 1113 | 1279 | 2596 | 30   | 1145 |
| cb8564_c35093/f1p5/2916                                                                                                                  | gnl BL_ORD_ID 14410      cb8564_c44256/f1p1/3267<br>isoform=cb8564_c44256;full_length_coverage=1;non_full_length_coverage=1;isoform_length=3267;expected_accuracy=0.995 | 20   | 2169 | 2165 | 2881 | 2    | 2119 | 2553 | 3267 |
| cb6646_c13/f1p0/2790                                                                                                                     | gnl BL_ORD_ID 3729      cb6646_c22/f1p1/2606<br>isoform=cb6646_c22;full_length_coverage=1;non_full_length_coverage=1;isoform_length=2606;expected_accuracy=0.996        | 314  | 2386 | 53   | 315  | 380  | 2452 | 1    | 263  |
| cb1822_c15/f1p0/1826<br>isoform=cb1822_c15;full_length_coverage=1;non_full_length_coverage=0;isoform_length=1826;expected_accuracy=0.998 | gnl BL_ORD_ID 32354      cb1822_c17/f1p0/5987<br>isoform=cb1822_c17;full_length_coverage=1;non_full_length_coverage=0;isoform_length=5987;expected_accuracy=0.997       | 1    | 1676 | 1671 | 1826 | 769  | 2449 | 5178 | 5333 |
| cb2831_c4/f3p1/2824<br>isoform=cb2831_c4;full_length_coverage=3;non_full_length_coverage=1;isoform_length=2824;expected_accuracy=0.998   | gnl BL_ORD_ID 68914      cb2831_c15/f1p0/3921                                                                                                                           | 124  | 2352 | 2353 | 2808 | 2    | 2230 | 3098 | 3553 |



|                                                                                                                                                  |                                                                                                                                                                         |      |      |      |      |      |      |      |      |
|--------------------------------------------------------------------------------------------------------------------------------------------------|-------------------------------------------------------------------------------------------------------------------------------------------------------------------------|------|------|------|------|------|------|------|------|
| cb8564_c107982/f2p0/2940<br>isoform=cb8564_c107982;full_length_coverage=2;non_full_length_coverage=0;isoform_length=2940;expected_accuracy=0.998 | gnl BL_ORD_ID 16997      cb8564_c75534/f1p0/3028<br>isoform=cb8564_c75534;full_length_coverage=1;non_full_length_coverage=0;isoform_length=3028;expected_accuracy=0.994 | 17   | 1784 | 1785 | 2909 | 21   | 1796 | 1904 | 3028 |
| cb5290_c64/f1p0/3128                                                                                                                             | gnl BL_ORD_ID 73746      cb5290_c79/f1p0/2804                                                                                                                           | 15   | 1748 | 1747 | 2651 | 26   | 1759 | 1885 | 2790 |
| cb8564_c41162/f1p0/3158                                                                                                                          | gnl BL_ORD_ID 56764      cb8564_c70795/f1p0/3769                                                                                                                        | 23   | 2553 | 2548 | 3040 | 34   | 2568 | 2699 | 3187 |
| cb7771_c4/f1p0/2059<br>isoform=cb7771_c4;full_length_coverage=1;non_full_length_coverage=0;isoform_length=2059;expected_accuracy=1.000           | gnl BL_ORD_ID 7436      cb7771_c3/f1p0/2176<br>isoform=cb7771_c3;full_length_coverage=1;non_full_length_coverage=0;isoform_length=2176;expected_accuracy=0.994          | 1    | 1351 | 1349 | 2059 | 16   | 1329 | 1432 | 2139 |
| cb8564_c45699/f1p0/3005                                                                                                                          | gnl BL_ORD_ID 14407      cb8564_c44036/f1p0/3258<br>isoform=cb8564_c44036;full_length_coverage=1;non_full_length_coverage=0;isoform_length=3258;expected_accuracy=0.992 | 1161 | 2844 | 1    | 1161 | 1575 | 3258 | 1    | 1147 |
| cb8564_c48235/f1p1/2252                                                                                                                          | gnl BL_ORD_ID 15623      cb8564_c51515/f1p1/2999<br>isoform=cb8564_c51515;full_length_coverage=1;non_full_length_coverage=1;isoform_length=2999;expected_accuracy=0.992 | 1    | 1600 | 1596 | 2234 | 4    | 1588 | 2367 | 2999 |
| cb12931_c15/f1p0/1493<br>isoform=cb12931_c15;full_length_coverage=1;non_full_length_coverage=0;isoform_length=1493;expected_accuracy=1.000       | gnl BL_ORD_ID 56601      cb8564_c48153/f1p0/3083                                                                                                                        | 1    | 1106 | 1104 | 1492 | 13   | 1109 | 2491 | 2879 |
| cb666_c12/f1p0/3434<br>isoform=cb666_c12;full_length_coverage=1;non_full_length_coverage=0;isoform_length=3434;expected_accuracy=1.000           | gnl BL_ORD_ID 47188      cb666_c0/f1p0/4630                                                                                                                             | 334  | 3434 | 1    | 334  | 1444 | 4578 | 133  | 467  |

|                                                                                                                                                                                                       |                                                                                                                                                                                          |     |      |      |      |      |          |      |          |
|-------------------------------------------------------------------------------------------------------------------------------------------------------------------------------------------------------|------------------------------------------------------------------------------------------------------------------------------------------------------------------------------------------|-----|------|------|------|------|----------|------|----------|
| ngth_coverage=0;isoform_length=3434;expected_accuracy=0.991<br>cb2252_c0/f2p0/1094<br>isoform=cb2252_c0;full_length_coverage=2;non_full_length_coverage=0;isoform_length=1094;expected_accuracy=1.000 | gnl BL_ORD_ID 69656 cb2252_c1/f1p0/4037                                                                                                                                                  | 367 | 1094 | 7    | 367  | 3052 | 377<br>9 | 4    | 363      |
| cb6875_c10/f1p0/1769                                                                                                                                                                                  | gnl BL_ORD_ID 5625                      cb6875_c5/f1p0/2662<br>isoform=cb6875_c5;full_length_coverage=1;non_full_length_coverage=0;isoform_length=2662;expected_accuracy=0.991           | 417 | 1743 | 55   | 417  | 1278 | 260<br>0 | 1    | 365      |
| cb8564_c24281/f1p0/3435                                                                                                                                                                               | gnl BL_ORD_ID 15789                      cb8564_c58034/f2p2/3989<br>isoform=cb8564_c58034;full_length_coverage=2;non_full_length_coverage=2;isoform_length=3989;expected_accuracy=0.996  | 15  | 3170 | 3166 | 3284 | 27   | 316<br>9 | 3288 | 340<br>4 |
| cb8564_c15376/f1p0/4060                                                                                                                                                                               | gnl BL_ORD_ID 9876                      cb8564_c10064/f5p11/3897<br>isoform=cb8564_c10064;full_length_coverage=5;non_full_length_coverage=11;isoform_length=3897;expected_accuracy=0.996 | 12  | 2717 | 2717 | 3675 | 10   | 271<br>2 | 2816 | 377<br>4 |
| cb8564_c44063/f1p0/2503<br>isoform=cb8564_c44063;full_length_coverage=1;non_full_length_coverage=0;isoform_length=2503;expected_accuracy=0.999                                                        | gnl BL_ORD_ID 55114 cb8564_c24784/f1p1/2695                                                                                                                                              | 398 | 2446 | 4    | 402  | 551  | 259<br>9 | 9    | 408      |
| cb2747_c15/f1p2/3376<br>isoform=cb2747_c15;full_length_coverage=1;non_full_length_coverage=2;isoform_length=3376;expected_accuracy=0.994                                                              | gnl BL_ORD_ID 68803 cb2747_c3/f1p0/3786                                                                                                                                                  | 13  | 2335 | 2331 | 3286 | 4    | 232<br>0 | 2741 | 371<br>4 |

|                                                                                                                                                  |                                                                                                                                                          |      |      |      |      |      |          |      |          |
|--------------------------------------------------------------------------------------------------------------------------------------------------|----------------------------------------------------------------------------------------------------------------------------------------------------------|------|------|------|------|------|----------|------|----------|
| cb8564_c51661/f1p0/3132                                                                                                                          | gnl BL_ORD_ID 55544 cb8564_c44764/f1p0/3516                                                                                                              | 1    | 2104 | 2099 | 3077 | 47   | 215<br>1 | 2308 | 328<br>6 |
| cb3383_c3/f1p0/3067<br>isoform=cb3383_c3;full_length_coverage=1;non_full_length_coverage=0;isoform_length=3067;expected_accuracy=0.996           | gnl BL_ORD_ID 71165 cb3383_c2/f1p0/3641                                                                                                                  | 1    | 2046 | 2045 | 3065 | 44   | 207<br>7 | 2217 | 323<br>5 |
| cb4452_c2/f3p0/1957<br>isoform=cb4452_c2;full_length_coverage=3;non_full_length_coverage=0;isoform_length=1957;expected_accuracy=1.000           | gnl BL_ORD_ID 72573 cb4452_c6/f1p0/3034                                                                                                                  | 1    | 1509 | 1507 | 1931 | 91   | 160<br>0 | 2600 | 302<br>3 |
| cb292_c11/f1p1/4167                                                                                                                              | gnl BL_ORD_ID 38399 cb292_c6/f1p0/4480<br>isoform=cb292_c6;full_length_coverage=1;non_full_length_coverage=0;isoform_length=4480;expected_accuracy=0.997 | 104  | 2211 | 2207 | 4142 | 1    | 210<br>8 | 2546 | 448<br>0 |
| cb8564_c146072/f3p3/2176<br>isoform=cb8564_c146072;full_length_coverage=3;non_full_length_coverage=3;isoform_length=2176;expected_accuracy=1.000 | gnl BL_ORD_ID 54238 cb8564_c21052/f1p2/3145                                                                                                              | 213  | 2165 | 1    | 215  | 1105 | 305<br>6 | 28   | 249      |
| cb8564_c40598/f1p4/3119                                                                                                                          | gnl BL_ORD_ID 55910 cb8564_c48645/f1p1/3287                                                                                                              | 12   | 2732 | 2729 | 2988 | 17   | 273<br>3 | 2854 | 3113     |
| cb8564_c188097/f1p0/2552<br>isoform=cb8564_c188097;full_length_coverage=1;non_full_length_coverage=0;isoform_length=2552;expected_accuracy=0.996 | gnl BL_ORD_ID 58179 cb8564_c90747/f1p0/2795                                                                                                              | 1    | 1945 | 1940 | 2552 | 1    | 191<br>8 | 2021 | 263<br>3 |
| cb5271_c13/f1p0/2572<br>isoform=cb5271_c13;full_length_coverage=1;non_full                                                                       | gnl BL_ORD_ID 73722 cb5271_c15/f1p0/2907                                                                                                                 | 1042 | 2553 | 1    | 1044 | 1245 | 275<br>8 | 100  | 1142     |

|                                                                                                                      |                                                                                                                     |                         |     |      |      |      |      |      |      |      |
|----------------------------------------------------------------------------------------------------------------------|---------------------------------------------------------------------------------------------------------------------|-------------------------|-----|------|------|------|------|------|------|------|
| length_coverage=0;isoform_length=2572;expected_accuracy=0.993                                                        |                                                                                                                     |                         |     |      |      |      |      |      |      |      |
| cb8564_c87022/f1p0/2331                                                                                              | gnl BL_ORD_ID 17359                                                                                                 | cb8564_c89607/f1p0/2600 |     |      |      |      |      |      |      |      |
| isoform=cb8564_c87022;full_length_coverage=1;non_full_length_coverage=0;isoform_length=2331;expected_accuracy=0.994  | isoform=cb8564_c89607;full_length_coverage=1;non_full_length_coverage=0;isoform_length=2600;expected_accuracy=1.000 |                         | 1   | 1183 | 1182 | 2330 | 1    | 1183 | 1441 | 2600 |
| cb5874_c15/f1p0/2254                                                                                                 | gnl BL_ORD_ID 45911                                                                                                 | cb5874_c11/f2p1/2975    |     |      |      |      |      |      |      |      |
|                                                                                                                      | isoform=cb5874_c11;full_length_coverage=2;non_full_length_coverage=1;isoform_length=2975;expected_accuracy=1.000    |                         | 225 | 2249 | 1    | 224  | 832  | 2856 | 409  | 632  |
| cb8564_c180116/f1p0/2944                                                                                             |                                                                                                                     |                         |     |      |      |      |      |      |      |      |
| isoform=cb8564_c180116;full_length_coverage=1;non_full_length_coverage=0;isoform_length=2944;expected_accuracy=0.996 | gnl BL_ORD_ID 57017                                                                                                 | cb8564_c80370/f1p0/3493 | 123 | 2522 | 2520 | 2944 | 3085 | 686  | 457  | 33   |
| cb8564_c36056/f1p0/2652                                                                                              |                                                                                                                     |                         |     |      |      |      |      |      |      |      |
| isoform=cb8564_c36056;full_length_coverage=1;non_full_length_coverage=0;isoform_length=2652;expected_accuracy=0.999  | gnl BL_ORD_ID 56601                                                                                                 | cb8564_c48153/f1p0/3083 | 248 | 2651 | 1    | 251  | 474  | 2879 | 82   | 330  |
| cb4795_c3/f1p0/1980                                                                                                  | gnl BL_ORD_ID 43899                                                                                                 | cb4795_c2/f1p0/3264     |     |      |      |      |      |      |      |      |
| isoform=cb4795_c3;full_length_coverage=1;non_full_length_coverage=0;isoform_length=1980;expected_accuracy=0.999      | isoform=cb4795_c2;full_length_coverage=1;non_full_length_coverage=0;isoform_length=3264;expected_accuracy=0.998     |                         | 262 | 1980 | 45   | 262  | 1546 | 3264 | 112  | 329  |
| cb3747_c11/f1p0/2520                                                                                                 |                                                                                                                     |                         |     |      |      |      |      |      |      |      |
| isoform=cb3747_c11;full_length_coverage=1;non_full_length_coverage=0;isoform_length=2520;expected_accuracy=0.994     | gnl BL_ORD_ID 70583                                                                                                 | cb3747_c16/f1p1/3060    | 1   | 1743 | 1742 | 2520 | 71   | 1813 | 2046 | 2824 |

|                                                                                                                                                  |                                                                                                                                                                                 |     |      |      |      |      |      |      |      |
|--------------------------------------------------------------------------------------------------------------------------------------------------|---------------------------------------------------------------------------------------------------------------------------------------------------------------------------------|-----|------|------|------|------|------|------|------|
| cb500_c43/f1p0/3109<br>isoform=cb500_c43;full_length_coverage=1;non_full_length_coverage=0;isoform_length=3109;expected_accuracy=0.992           | gnl BL_ORD_ID 72248 cb500_c53/f1p0/3672                                                                                                                                         | 13  | 2306 | 2303 | 3109 | 112  | 2414 | 2546 | 3353 |
| cb8564_c37936/f3p0/3317<br>isoform=cb8564_c37936;full_length_coverage=3;non_full_length_coverage=0;isoform_length=3317;expected_accuracy=0.998   | gnl BL_ORD_ID 55806 cb8564_c38998/f1p0/4043                                                                                                                                     | 25  | 2554 | 2553 | 3205 | 1    | 2527 | 3096 | 3748 |
| cb8564_c4643/f1p1/2554                                                                                                                           | gnl BL_ORD_ID 56319 cb8564_c74283/f1p0/3024                                                                                                                                     | 1   | 1705 | 1700 | 2542 | 13   | 1717 | 1850 | 2692 |
| cb9667_c4/f1p0/1542<br>isoform=cb9667_c4;full_length_coverage=1;non_full_length_coverage=0;isoform_length=1542;expected_accuracy=1.000           | gnl BL_ORD_ID 22169                      cb9667_c5/f7p0/1958<br>isoform=cb9667_c5;full_length_coverage=7;non_full_length_coverage=0;isoform_length=1958;expected_accuracy=0.999 | 1   | 1231 | 1231 | 1542 | 1    | 1232 | 1646 | 1958 |
| cb8564_c121435/f1p0/2218<br>isoform=cb8564_c121435;full_length_coverage=1;non_full_length_coverage=0;isoform_length=2218;expected_accuracy=0.997 | gnl BL_ORD_ID 55611 cb8564_c46736/f1p1/2681                                                                                                                                     | 12  | 1691 | 1693 | 2150 | 30   | 1705 | 2092 | 2550 |
| cb1317_c16/f1p1/2428                                                                                                                             | gnl BL_ORD_ID 61229 cb1317_c8/f1p0/4195                                                                                                                                         | 229 | 2361 | 1    | 227  | 2167 | 4297 | 9    | 232  |
| cb841_c30/f1p1/3368<br>isoform=cb841_c30;full_length_coverage=1;non_full_length_coverage=1;isoform_length=3368;expected_accuracy=0.997           | gnl BL_ORD_ID 9504                      cb841_c6/f1p1/4702<br>isoform=cb841_c6;full_length_coverage=1;non_full_length_coverage=1;isoform_length=4702;expected_accuracy=0.993    | 1   | 3072 | 3073 | 3368 | 1    | 3064 | 3200 | 3495 |
| cb8564_c34638/f1p0/2817<br>isoform=cb8564_c34638;full_length_coverage=1;non_f                                                                    | gnl BL_ORD_ID 16172                      cb8564_c53024/f1p0/3159<br>isoform=cb8564_c53024;full_length_coverage=1;non_fu                                                         | 1   | 1690 | 1687 | 2817 | 1    | 1699 | 2017 | 3157 |

|                                                                                                                                                                                                                                                                                                                                                                                                                                                                                                                                                                                                                                                                                                                                                                                                                                                                                                        |                                                                                                                                                                                                                                                                                                                                                                                                                                                                                                                                                                                                                 |     |      |      |      |      |     |      |     |
|--------------------------------------------------------------------------------------------------------------------------------------------------------------------------------------------------------------------------------------------------------------------------------------------------------------------------------------------------------------------------------------------------------------------------------------------------------------------------------------------------------------------------------------------------------------------------------------------------------------------------------------------------------------------------------------------------------------------------------------------------------------------------------------------------------------------------------------------------------------------------------------------------------|-----------------------------------------------------------------------------------------------------------------------------------------------------------------------------------------------------------------------------------------------------------------------------------------------------------------------------------------------------------------------------------------------------------------------------------------------------------------------------------------------------------------------------------------------------------------------------------------------------------------|-----|------|------|------|------|-----|------|-----|
| ull_length_coverage=0;isoform_length=2817;expected_accuracy=0.992<br>cb8971_c13/f1p6/3627<br>isoform=cb8971_c13;full_length_coverage=1;non_full_length_coverage=6;isoform_length=3627;expected_accuracy=0.996<br>cb9696_c0/f1p0/1994<br>isoform=cb9696_c0;full_length_coverage=1;non_full_length_coverage=0;isoform_length=1994;expected_accuracy=1.000<br>cb4273_c3/f1p0/3269<br>isoform=cb4273_c3;full_length_coverage=1;non_full_length_coverage=0;isoform_length=3269;expected_accuracy=1.000<br>cb4889_c22/f1p0/2625<br>isoform=cb4889_c22;full_length_coverage=1;non_full_length_coverage=0;isoform_length=2625;expected_accuracy=0.995<br>cb8564_c75453/f1p2/2270<br>isoform=cb8564_c75453;full_length_coverage=1;non_full_length_coverage=2;isoform_length=2270;expected_accuracy=0.996<br>cb7696_c12/f1p1/1985<br>cb3482_c32/f1p0/1683<br>isoform=cb3482_c32;full_length_coverage=1;non_full_ | ll_length_coverage=0;isoform_length=3159;expected_accuracy=0.996<br>gnl BL_ORD_ID 19877                      cb8971_c6/f1p2/4360<br>isoform=cb8971_c6;full_length_coverage=1;non_full_length_coverage=2;isoform_length=4360;expected_accuracy=0.997<br>gnl BL_ORD_ID 58853   cb9696_c1/f1p0/2146<br>gnl BL_ORD_ID 72419   cb4273_c1/f2p0/3358<br>gnl BL_ORD_ID 73050   cb4889_c18/f1p4/2830<br>gnl BL_ORD_ID 57038   cb8564_c81286/f1p2/3636<br>gnl BL_ORD_ID 50658   cb7696_c6/f1p0/2680<br>gnl BL_ORD_ID 40350                      cb3482_c6/f7p2/2166<br>isoform=cb3482_c6;full_length_coverage=7;non_full_ | 1   | 2329 | 2326 | 3627 | 23   | 234 | 3052 | 435 |
|                                                                                                                                                                                                                                                                                                                                                                                                                                                                                                                                                                                                                                                                                                                                                                                                                                                                                                        |                                                                                                                                                                                                                                                                                                                                                                                                                                                                                                                                                                                                                 | 4   |      |      |      |      |     | 0    |     |
|                                                                                                                                                                                                                                                                                                                                                                                                                                                                                                                                                                                                                                                                                                                                                                                                                                                                                                        |                                                                                                                                                                                                                                                                                                                                                                                                                                                                                                                                                                                                                 | 1   | 1363 | 1360 | 1993 | 39   | 140 | 1524 | 215 |
|                                                                                                                                                                                                                                                                                                                                                                                                                                                                                                                                                                                                                                                                                                                                                                                                                                                                                                        |                                                                                                                                                                                                                                                                                                                                                                                                                                                                                                                                                                                                                 |     |      |      |      |      | 1   |      | 4   |
|                                                                                                                                                                                                                                                                                                                                                                                                                                                                                                                                                                                                                                                                                                                                                                                                                                                                                                        |                                                                                                                                                                                                                                                                                                                                                                                                                                                                                                                                                                                                                 | 107 | 3183 | 1    | 106  | 278  | 336 | 1    | 104 |
|                                                                                                                                                                                                                                                                                                                                                                                                                                                                                                                                                                                                                                                                                                                                                                                                                                                                                                        |                                                                                                                                                                                                                                                                                                                                                                                                                                                                                                                                                                                                                 |     |      |      |      |      | 1   |      |     |
|                                                                                                                                                                                                                                                                                                                                                                                                                                                                                                                                                                                                                                                                                                                                                                                                                                                                                                        |                                                                                                                                                                                                                                                                                                                                                                                                                                                                                                                                                                                                                 | 280 | 2622 | 29   | 285  | 425  | 276 | 1    | 257 |
|                                                                                                                                                                                                                                                                                                                                                                                                                                                                                                                                                                                                                                                                                                                                                                                                                                                                                                        |                                                                                                                                                                                                                                                                                                                                                                                                                                                                                                                                                                                                                 |     |      |      |      |      | 7   |      |     |
|                                                                                                                                                                                                                                                                                                                                                                                                                                                                                                                                                                                                                                                                                                                                                                                                                                                                                                        |                                                                                                                                                                                                                                                                                                                                                                                                                                                                                                                                                                                                                 | 265 | 2270 | 84   | 267  | 1340 | 334 | 859  | 104 |
|                                                                                                                                                                                                                                                                                                                                                                                                                                                                                                                                                                                                                                                                                                                                                                                                                                                                                                        |                                                                                                                                                                                                                                                                                                                                                                                                                                                                                                                                                                                                                 |     |      |      |      |      | 4   |      | 2   |
|                                                                                                                                                                                                                                                                                                                                                                                                                                                                                                                                                                                                                                                                                                                                                                                                                                                                                                        |                                                                                                                                                                                                                                                                                                                                                                                                                                                                                                                                                                                                                 | 1   | 1746 | 1748 | 1980 | 4    | 174 | 2076 | 230 |
|                                                                                                                                                                                                                                                                                                                                                                                                                                                                                                                                                                                                                                                                                                                                                                                                                                                                                                        |                                                                                                                                                                                                                                                                                                                                                                                                                                                                                                                                                                                                                 |     |      |      |      |      | 9   |      | 8   |
|                                                                                                                                                                                                                                                                                                                                                                                                                                                                                                                                                                                                                                                                                                                                                                                                                                                                                                        |                                                                                                                                                                                                                                                                                                                                                                                                                                                                                                                                                                                                                 | 1   | 1586 | 1581 | 1683 | 110  | 171 | 1989 | 209 |
|                                                                                                                                                                                                                                                                                                                                                                                                                                                                                                                                                                                                                                                                                                                                                                                                                                                                                                        |                                                                                                                                                                                                                                                                                                                                                                                                                                                                                                                                                                                                                 |     |      |      |      |      | 0   |      | 1   |

|                                                               |                                                                                                                                                                          |      |      |      |      |      |          |      |          |
|---------------------------------------------------------------|--------------------------------------------------------------------------------------------------------------------------------------------------------------------------|------|------|------|------|------|----------|------|----------|
| length_coverage=0;isoform_length=1683;expected_accuracy=1.000 | length_coverage=2;isoform_length=2166;expected_accuracy=0.997                                                                                                            |      |      |      |      |      |          |      |          |
| cb5643_c42/f1p0/3067                                          | gnl BL_ORD_ID 45379      cb5643_c25/f1p0/3322<br>isoform=cb5643_c25;full_length_coverage=1;non_full_length_coverage=0;isoform_length=3322;expected_accuracy=0.998        | 109  | 2631 | 1    | 111  | 799  | 332<br>2 | 1    | 111      |
| cb8564_c21572/f1p1/3061                                       | gnl BL_ORD_ID 17336      cb8564_c9188/f4p3/3321<br>isoform=cb8564_c21572;full_length_coverage=1;non_full_length_coverage=1;isoform_length=3061;expected_accuracy=0.991   | 1127 | 3061 | 1    | 1125 | 1365 | 330<br>5 | 85   | 121<br>0 |
| cb8564_c46939/f1p1/2926                                       | gnl BL_ORD_ID 15924      cb8564_c52804/f1p5/3221<br>isoform=cb8564_c52804;full_length_coverage=1;non_full_length_coverage=5;isoform_length=3221;expected_accuracy=0.999  | 1    | 2134 | 2130 | 2870 | 1    | 214<br>2 | 2247 | 298<br>8 |
| cb8564_c13598/f1p0/3018                                       | gnl BL_ORD_ID 9831      cb8564_c106778/f15p6/3278<br>isoform=cb8564_c13598;full_length_coverage=1;non_full_length_coverage=0;isoform_length=3018;expected_accuracy=0.997 | 175  | 3016 | 1    | 180  | 401  | 324<br>2 | 2    | 181      |
| cb1142_c17/f1p1/2208                                          | gnl BL_ORD_ID 22503      cb1142_c24/f9p2/2781<br>isoform=cb1142_c24;full_length_coverage=9;non_full_length_coverage=2;isoform_length=2781;expected_accuracy=1.000        | 1    | 1127 | 1123 | 2211 | 52   | 1178     | 1600 | 268<br>8 |
| cb8564_c37409/f1p0/3153                                       | gnl BL_ORD_ID 17429      cb8564_c85447/f1p0/3196<br>isoform=cb8564_c85447;full_length_coverage=1;non_full_length_coverage=0;isoform_length=3196;expected_accuracy=0.997  | 1    | 2414 | 2413 | 2948 | 3    | 241<br>3 | 2660 | 319<br>1 |

|                          |                                                                                                                                                                            |      |      |      |      |      |      |      |      |
|--------------------------|----------------------------------------------------------------------------------------------------------------------------------------------------------------------------|------|------|------|------|------|------|------|------|
| cb8564_c40107/f1p0/4108  | gnl BL_ORD_ID 15822      cb8564_c50372/f4p2/4090<br>isoform=cb8564_c50372;full_length_coverage=4;non_full_length_coverage=2;isoform_length=4090;expected_accuracy=0.996    | 1603 | 3955 | 1    | 1599 | 1707 | 4059 | 235  | 1827 |
| cb396_c18/f1p0/2281      | gnl BL_ORD_ID 39231      cb396_c67/f28p0/2542<br>isoform=cb396_c18;full_length_coverage=1;non_full_length_coverage=0;isoform_length=2281;expected_accuracy=0.999           | 250  | 2275 | 58   | 251  | 523  | 2542 | 1    | 191  |
| cb8564_c111744/f1p1/2111 | gnl BL_ORD_ID 12654      cb8564_c126593/f1p2/2518<br>isoform=cb8564_c111744;full_length_coverage=1;non_full_length_coverage=1;isoform_length=2111;expected_accuracy=0.998  | 1    | 1639 | 1635 | 2111 | 49   | 1683 | 1856 | 2331 |
| cb8564_c15653/f1p4/2475  | gnl BL_ORD_ID 9475      cb8564_c108093/f2p11/2745<br>isoform=cb8564_c108093;full_length_coverage=2;non_full_length_coverage=11;isoform_length=2745;expected_accuracy=0.998 | 1    | 2293 | 2289 | 2478 | 11   | 2307 | 2526 | 2738 |
| cb3712_c4/f1p1/2242      | gnl BL_ORD_ID 71460      cb3712_c5/f1p1/2972<br>isoform=cb3712_c4;full_length_coverage=1;non_full_length_coverage=1;isoform_length=2242;expected_accuracy=0.995            | 272  | 2235 | 30   | 274  | 861  | 2821 | 1    | 243  |
| cb6696_c3/f1p0/1462      | gnl BL_ORD_ID 47655      cb6696_c0/f1p0/2790                                                                                                                               | 383  | 1461 | 6    | 384  | 1683 | 2761 | 1    | 380  |
| cb7550_c8/f1p0/1702      | gnl BL_ORD_ID 6825      cb7550_c0/f3p1/1956<br>isoform=cb7550_c0;full_length_coverage=3;non_full_length_coverage=1;isoform_length=1956;expected_accuracy=1.000             | 1    | 1177 | 1174 | 1652 | 45   | 1223 | 1432 | 1910 |



|                                                                                                                                                    |                                                                                                                                                                           |     |      |      |      |      |      |      |      |
|----------------------------------------------------------------------------------------------------------------------------------------------------|---------------------------------------------------------------------------------------------------------------------------------------------------------------------------|-----|------|------|------|------|------|------|------|
| cb8564_c106924/f3p13/3304<br>isoform=cb8564_c106924;full_length_coverage=3;non_full_length_coverage=13;isoform_length=3304;expected_accuracy=1.000 | gnl BL_ORD_ID 14377      cb8564_c36097/f1p2/3430<br>isoform=cb8564_c36097;full_length_coverage=1;non_full_length_coverage=2;isoform_length=3430;expected_accuracy=0.996   | 156 | 1895 | 1895 | 3304 | 130  | 1865 | 1995 | 3400 |
| cb3941_c92/f1p0/2573                                                                                                                               | gnl BL_ORD_ID 70694      cb3941_c42/f1p0/2695                                                                                                                             | 136 | 2167 | 10   | 141  | 669  | 2700 | 46   | 177  |
| cb3436_c2/f1p0/2155<br>isoform=cb3436_c2;full_length_coverage=1;non_full_length_coverage=0;isoform_length=2155;expected_accuracy=0.997             | gnl BL_ORD_ID 41176      cb3436_c1/f1p0/3048<br>isoform=cb3436_c1;full_length_coverage=1;non_full_length_coverage=0;isoform_length=3048;expected_accuracy=1.000           | 1   | 1429 | 1426 | 2151 | 12   | 1438 | 2321 | 3046 |
| cb8564_c40764/f1p0/2563<br>isoform=cb8564_c40764;full_length_coverage=1;non_full_length_coverage=0;isoform_length=2563;expected_accuracy=0.997     | gnl BL_ORD_ID 13312      cb8564_c188074/f1p0/2869<br>isoform=cb8564_c188074;full_length_coverage=1;non_full_length_coverage=0;isoform_length=2869;expected_accuracy=0.996 | 1   | 2161 | 2162 | 2563 | 1    | 2158 | 2287 | 2688 |
| cb8564_c68409/f2p0/2141<br>isoform=cb8564_c68409;full_length_coverage=2;non_full_length_coverage=0;isoform_length=2141;expected_accuracy=0.995     | gnl BL_ORD_ID 58113      cb8564_c89263/f1p0/2300                                                                                                                          | 264 | 2124 | 53   | 266  | 352  | 2213 | 1    | 214  |
| cb12972_c35/f1p0/1854                                                                                                                              | gnl BL_ORD_ID 14141      cb8564_c2622/f1p1/2613<br>isoform=cb8564_c2622;full_length_coverage=1;non_full_length_coverage=1;isoform_length=2613;expected_accuracy=0.996     | 247 | 1729 | 45   | 248  | 1054 | 2523 | 1    | 204  |
| cb8564_c48551/f1p0/2454<br>isoform=cb8564_c48551;full_length_coverage=1;non_full_length_coverage=0;isoform_length=2454;expected_accuracy=0.995     | gnl BL_ORD_ID 54752      cb8564_c167108/f1p0/2919                                                                                                                         | 1   | 1438 | 1438 | 2454 | 105  | 1541 | 1811 | 2828 |

|                                                                                                                                                  |                                                                                                                                                                             |      |      |      |      |      |          |      |          |
|--------------------------------------------------------------------------------------------------------------------------------------------------|-----------------------------------------------------------------------------------------------------------------------------------------------------------------------------|------|------|------|------|------|----------|------|----------|
| cb14420_c0/f4p0/1483<br>isoform=cb14420_c0;full_length_coverage=4;non_full_length_coverage=0;isoform_length=1483;expected_accuracy=1.000         | gnl BL_ORD_ID 11669      cb8564_c124605/f1p0/2372<br>isoform=cb8564_c124605;full_length_coverage=1;non_full_length_coverage=0;isoform_length=2372;expected_accuracy=0.999   | 595  | 1483 | 6    | 596  | 1484 | 237<br>2 | 1    | 592      |
| cb1913_c44/f1p0/2236<br>isoform=cb1913_c44;full_length_coverage=1;non_full_length_coverage=0;isoform_length=2236;expected_accuracy=0.998         | gnl BL_ORD_ID 66488      cb1913_c37/f1p0/2644                                                                                                                               | 1    | 1634 | 1630 | 2236 | 115  | 174<br>7 | 1881 | 248<br>7 |
| cb8564_c178226/f1p0/2728<br>isoform=cb8564_c178226;full_length_coverage=1;non_full_length_coverage=0;isoform_length=2728;expected_accuracy=0.998 | gnl BL_ORD_ID 55413      cb8564_c40978/f1p0/3073                                                                                                                            | 1284 | 2728 | 1    | 1288 | 1402 | 284<br>7 | 1    | 129<br>8 |
| cb8564_c34047/f2p0/3175<br>isoform=cb8564_c34047;full_length_coverage=2;non_full_length_coverage=0;isoform_length=3175;expected_accuracy=1.000   | gnl BL_ORD_ID 15354      cb8564_c45229/f4p1/3393<br>isoform=cb8564_c45229;full_length_coverage=4;non_full_length_coverage=1;isoform_length=3393;expected_accuracy=0.999     | 1    | 2174 | 2171 | 3121 | 149  | 232<br>1 | 2441 | 339<br>3 |
| cb16375_c1/f1p0/1380<br>isoform=cb16375_c1;full_length_coverage=1;non_full_length_coverage=0;isoform_length=1380;expected_accuracy=0.999         | gnl BL_ORD_ID 16832      cb8564_c48460/f1p0/2462<br>isoform=cb8564_c48460;full_length_coverage=1;non_full_length_coverage=0;isoform_length=2462;expected_accuracy=0.996     | 1    | 1051 | 1050 | 1380 | 93   | 1143     | 2048 | 237<br>5 |
| cb8564_c21767/f1p1/2839<br>isoform=cb8564_c21767;full_length_coverage=1;non_full_length_coverage=1;isoform_length=2839;expected_accuracy=0.996   | gnl BL_ORD_ID 11214      cb8564_c146144/f12p2/3048<br>isoform=cb8564_c146144;full_length_coverage=12;non_full_length_coverage=2;isoform_length=3048;expected_accuracy=0.999 | 1040 | 2839 | 1    | 1040 | 1244 | 304<br>7 | 57   | 109<br>7 |
| cb3586_c3/f1p0/2988<br>isoform=cb3586_c3;full_length_coverage=1;non_full_length_coverage=0;isoform_length=2988;expected_accuracy=0.999           | gnl BL_ORD_ID 71356      cb3586_c9/f1p0/3463                                                                                                                                | 292  | 2988 | 1    | 295  | 763  | 347<br>1 | 4    | 301      |

|                                                                                                                     |                                                                                                                     |                         |     |      |      |      |     |      |      |      |
|---------------------------------------------------------------------------------------------------------------------|---------------------------------------------------------------------------------------------------------------------|-------------------------|-----|------|------|------|-----|------|------|------|
| ngth_coverage=0;isoform_length=2988;expected_accuracy=0.993                                                         |                                                                                                                     |                         |     |      |      |      |     |      |      |      |
| cb9674_c0/f4p2/2017                                                                                                 | gnl BL_ORD_ID 20444                                                                                                 | cb9674_c9/f1p0/2070     |     |      |      |      |     |      |      |      |
| isoform=cb9674_c0;full_length_coverage=4;non_full_length_coverage=2;isoform_length=2017;expected_accuracy=1.000     | isoform=cb9674_c9;full_length_coverage=1;non_full_length_coverage=0;isoform_length=2070;expected_accuracy=0.996     |                         | 1   | 1134 | 1135 | 1974 | 1   | 1131 | 1231 | 2070 |
| cb90_c17/f1p1/4529                                                                                                  | gnl BL_ORD_ID 59041                                                                                                 | cb90_c48/f1p0/5124      |     |      |      |      |     |      |      |      |
| isoform=cb90_c17;full_length_coverage=1;non_full_length_coverage=1;isoform_length=4529;expected_accuracy=0.992      |                                                                                                                     |                         | 350 | 4494 | 2    | 349  | 602 | 4743 | 17   | 367  |
| cb8564_c34212/f2p0/3637                                                                                             | gnl BL_ORD_ID 55975                                                                                                 | cb8564_c50843/f1p0/4165 |     |      |      |      |     |      |      |      |
| isoform=cb8564_c34212;full_length_coverage=2;non_full_length_coverage=0;isoform_length=3637;expected_accuracy=1.000 |                                                                                                                     |                         | 2   | 3244 | 3243 | 3637 | 8   | 3252 | 3639 | 4034 |
| cb8564_c4758/f1p0/2319                                                                                              | gnl BL_ORD_ID 14468                                                                                                 | cb8564_c38219/f2p2/2476 |     |      |      |      |     |      |      |      |
|                                                                                                                     | isoform=cb8564_c38219;full_length_coverage=2;non_full_length_coverage=2;isoform_length=2476;expected_accuracy=0.996 |                         | 14  | 1703 | 1700 | 2224 | 1   | 1702 | 1960 | 2476 |
| cb8564_c35935/f1p0/4149                                                                                             | gnl BL_ORD_ID 14314                                                                                                 | cb8564_c45827/f2p2/4435 |     |      |      |      |     |      |      |      |
| isoform=cb8564_c35935;full_length_coverage=1;non_full_length_coverage=0;isoform_length=4149;expected_accuracy=0.993 | isoform=cb8564_c45827;full_length_coverage=2;non_full_length_coverage=2;isoform_length=4435;expected_accuracy=0.999 |                         | 15  | 3258 | 3254 | 4149 | 1   | 3255 | 3520 | 4421 |
| cb313_c5/f2p0/2828                                                                                                  | gnl BL_ORD_ID 36627                                                                                                 | cb313_c24/f1p0/3081     |     |      |      |      |     |      |      |      |
| isoform=cb313_c5;full_length_coverage=2;non_full_length_coverage=0;isoform_length=2828;expected_accuracy=0.997      | isoform=cb313_c24;full_length_coverage=1;non_full_length_coverage=0;isoform_length=3081;expected_accuracy=0.995     |                         | 1   | 2547 | 2545 | 2808 | 143 | 2688 | 2818 | 3081 |

|                                                                                                                                                |                                                                                                                                                                    |      |      |      |      |      |          |      |          |
|------------------------------------------------------------------------------------------------------------------------------------------------|--------------------------------------------------------------------------------------------------------------------------------------------------------------------|------|------|------|------|------|----------|------|----------|
| cb12_c37/f1p0/4067                                                                                                                             | gnl BL_ORD_ID 61080 cb12_c15/f1p1/4774                                                                                                                             | 286  | 4080 | 186  | 289  | 747  | 454<br>9 | 450  | 553      |
| cb8564_c36635/f1p0/4030<br>isoform=cb8564_c36635;full_length_coverage=1;non_full_length_coverage=0;isoform_length=4030;expected_accuracy=0.998 | gnl BL_ORD_ID 55207 cb8564_c35399/f1p0/4553                                                                                                                        | 184  | 4030 | 10   | 189  | 437  | 428<br>4 | 11   | 184      |
| cb2753_c18/f1p0/2859                                                                                                                           | gnl BL_ORD_ID 37926 cb2753_c3/f3p1/3689<br>isoform=cb2753_c3;full_length_coverage=3;non_full_length_coverage=1;isoform_length=3689;expected_accuracy=0.997         | 1    | 2193 | 2191 | 2700 | 687  | 288<br>5 | 3169 | 367<br>9 |
| cb7320_c3/f3p2/2470<br>isoform=cb7320_c3;full_length_coverage=3;non_full_length_coverage=2;isoform_length=2470;expected_accuracy=0.999         | gnl BL_ORD_ID 7016 cb7320_c7/f1p1/2801<br>isoform=cb7320_c7;full_length_coverage=1;non_full_length_coverage=1;isoform_length=2801;expected_accuracy=0.995          | 1241 | 2469 | 116  | 1241 | 1573 | 280<br>1 | 13   | 1137     |
| cb8564_c3788/f1p1/2424                                                                                                                         | gnl BL_ORD_ID 14097 cb8564_c3797/f2p1/2809<br>isoform=cb8564_c3797;full_length_coverage=2;non_full_length_coverage=1;isoform_length=2809;expected_accuracy=0.996   | 1    | 2114 | 2114 | 2382 | 281  | 239<br>5 | 2541 | 280<br>9 |
| cb8564_c44734/f1p1/3476<br>isoform=cb8564_c44734;full_length_coverage=1;non_full_length_coverage=1;isoform_length=3476;expected_accuracy=0.990 | gnl BL_ORD_ID 68032 cb18809_c1/f1p0/5493                                                                                                                           | 276  | 3476 | 17   | 275  | 2193 | 541<br>3 | 1    | 256      |
| cb8564_c35935/f1p0/4149<br>isoform=cb8564_c35935;full_length_coverage=1;non_full_length_coverage=0;isoform_length=4149;expected_accuracy=0.993 | gnl BL_ORD_ID 14819 cb8564_c40333/f1p2/4446<br>isoform=cb8564_c40333;full_length_coverage=1;non_full_length_coverage=2;isoform_length=4446;expected_accuracy=0.998 | 14   | 3258 | 3254 | 4149 | 1    | 328<br>0 | 3545 | 444<br>5 |

|                                                                                                                                                  |                                                                                                                                            |                         |      |      |      |      |      |      |      |      |
|--------------------------------------------------------------------------------------------------------------------------------------------------|--------------------------------------------------------------------------------------------------------------------------------------------|-------------------------|------|------|------|------|------|------|------|------|
| cb8564_c1933/f4p3/2042<br>isoform=cb8564_c1933;full_length_coverage=4;non_full_length_coverage=3;isoform_length=2042;expected_accuracy=0.992     | gnl BL_ORD_ID 13510<br>isoform=cb8564_c1931;full_length_coverage=2;non_full_length_coverage=1;isoform_length=2498;expected_accuracy=1.000  | cb8564_c1931/f2p1/2498  | 1    | 1210 | 1209 | 2000 | 1    | 1210 | 1708 | 2498 |
| cb4881_c4/f1p0/2342<br>isoform=cb4881_c4;full_length_coverage=1;non_full_length_coverage=0;isoform_length=2342;expected_accuracy=0.996           | gnl BL_ORD_ID 43200<br>isoform=cb4881_c1;full_length_coverage=2;non_full_length_coverage=1;isoform_length=2532;expected_accuracy=0.999     | cb4881_c1/f2p1/2532     | 136  | 2313 | 1    | 137  | 357  | 2532 | 99   | 236  |
| cb3366_c9/f1p1/2799<br>isoform=cb3366_c9;full_length_coverage=1;non_full_length_coverage=1;isoform_length=2799;expected_accuracy=0.996           | gnl BL_ORD_ID 41548<br>isoform=cb3366_c7;full_length_coverage=1;non_full_length_coverage=0;isoform_length=3317;expected_accuracy=0.997     | cb3366_c7/f1p0/3317     | 1    | 2217 | 2215 | 2669 | 8    | 2221 | 2863 | 3317 |
| cb8564_c108411/f1p1/3146<br>isoform=cb8564_c108411;full_length_coverage=1;non_full_length_coverage=1;isoform_length=3146;expected_accuracy=0.991 | gnl BL_ORD_ID 9449<br>isoform=cb8564_c12123;full_length_coverage=1;non_full_length_coverage=1;isoform_length=3473;expected_accuracy=1.000  | cb8564_c12123/f1p1/3473 | 1    | 2424 | 2422 | 3053 | 106  | 2501 | 2847 | 3473 |
| cb3229_c6/f1p0/2608<br>isoform=cb3229_c6;full_length_coverage=1;non_full_length_coverage=0;isoform_length=2608;expected_accuracy=1.000           | gnl BL_ORD_ID 40614<br>isoform=cb3229_c16;full_length_coverage=1;non_full_length_coverage=0;isoform_length=2853;expected_accuracy=0.997    | cb3229_c16/f1p0/2853    | 1    | 2322 | 2321 | 2608 | 16   | 2311 | 2451 | 2738 |
| cb2834_c17/f1p0/3060                                                                                                                             | gnl BL_ORD_ID 68923                                                                                                                        | cb2834_c8/f1p2/3513     | 1355 | 2943 | 1    | 1360 | 1937 | 3523 | 1    | 1360 |
| cb8564_c36689/f1p1/2368<br>isoform=cb8564_c36689;full_length_coverage=1;non_full_length_coverage=1;isoform_length=2368;expected_accuracy=0.991   | gnl BL_ORD_ID 16172<br>isoform=cb8564_c53024;full_length_coverage=1;non_full_length_coverage=0;isoform_length=3159;expected_accuracy=0.996 | cb8564_c53024/f1p0/3159 | 1    | 1709 | 1706 | 2368 | 1    | 1671 | 2490 | 3153 |

|                                                                                                                                          |                                                                                                                                                                             |      |      |      |      |      |      |      |      |
|------------------------------------------------------------------------------------------------------------------------------------------|-----------------------------------------------------------------------------------------------------------------------------------------------------------------------------|------|------|------|------|------|------|------|------|
| cb5900_c97/f1p0/2618<br>isoform=cb5900_c97;full_length_coverage=1;non_full_length_coverage=0;isoform_length=2618;expected_accuracy=0.993 | gnl BL_ORD_ID 44981      cb5900_c96/f1p0/2763<br>isoform=cb5900_c96;full_length_coverage=1;non_full_length_coverage=0;isoform_length=2763;expected_accuracy=0.996           | 1039 | 2614 | 1    | 1041 | 1194 | 2763 | 1    | 1032 |
| cb5842_c5/f1p0/1317                                                                                                                      | gnl BL_ORD_ID 47117      cb5842_c4/f1p0/1486<br>isoform=cb5842_c4;full_length_coverage=1;non_full_length_coverage=0;isoform_length=1486;expected_accuracy=0.998             | 112  | 1329 | 1    | 114  | 268  | 1486 | 42   | 155  |
| cb2779_c4/f1p0/1936<br>isoform=cb2779_c4;full_length_coverage=1;non_full_length_coverage=0;isoform_length=1936;expected_accuracy=1.000   | gnl BL_ORD_ID 39065      cb2779_c3/f1p1/3765<br>isoform=cb2779_c3;full_length_coverage=1;non_full_length_coverage=1;isoform_length=3765;expected_accuracy=0.991             | 1    | 1093 | 1092 | 1859 | 1    | 1098 | 2990 | 3765 |
| cb18456_c6530/f1p0/1200                                                                                                                  | gnl BL_ORD_ID 35899      cb18456_c3967/f1p4/1871<br>isoform=cb18456_c3967;full_length_coverage=1;non_full_length_coverage=4;isoform_length=1871;expected_accuracy=0.997     | 260  | 1166 | 3    | 259  | 926  | 1832 | 139  | 395  |
| cb12047_c103/f1p1/1531                                                                                                                   | gnl BL_ORD_ID 10309      cb8564_c106087/f1p13/1857<br>isoform=cb8564_c106087;full_length_coverage=1;non_full_length_coverage=13;isoform_length=1857;expected_accuracy=1.000 | 9    | 870  | 865  | 1546 | 4    | 874  | 1160 | 1842 |
| cb6904_c3/f4p5/1797<br>isoform=cb6904_c3;full_length_coverage=4;non_full_length_coverage=5;isoform_length=1797;expected_accuracy=1.000   | gnl BL_ORD_ID 47756      cb6904_c9/f1p1/2839                                                                                                                                | 395  | 1797 | 78   | 397  | 1328 | 2731 | 1    | 318  |
| cb13081_c10/f1p0/1495                                                                                                                    | gnl BL_ORD_ID 10154      cb8564_c11196/f5p0/2303<br>isoform=cb8564_c11196;full_length_coverage=5;non_full_length_coverage=0;isoform_length=2303;expected_accuracy=0.999     | 486  | 1284 | 7    | 488  | 1433 | 2230 | 11   | 492  |



|                                                                                                                                                  |                                                                                                                                             |                          |      |      |      |      |      |          |      |          |
|--------------------------------------------------------------------------------------------------------------------------------------------------|---------------------------------------------------------------------------------------------------------------------------------------------|--------------------------|------|------|------|------|------|----------|------|----------|
| cb8564_c34238/f4p1/4317<br>isoform=cb8564_c34238;full_length_coverage=4;non_full_length_coverage=1;isoform_length=4317;expected_accuracy=1.000   | gnl BL_ORD_ID 16628<br>isoform=cb8564_c47737;full_length_coverage=7;non_full_length_coverage=5;isoform_length=4351;expected_accuracy=0.998  | cb8564_c47737/f7p5/4351  | 285  | 4165 | 2    | 289  | 395  | 427<br>4 | 1    | 290      |
| cb8564_c75620/f1p0/2781<br>isoform=cb8564_c75620;full_length_coverage=1;non_full_length_coverage=0;isoform_length=2781;expected_accuracy=0.996   | gnl BL_ORD_ID 12051<br>isoform=cb8564_c147180;full_length_coverage=4;non_full_length_coverage=0;isoform_length=3043;expected_accuracy=0.998 | cb8564_c147180/f4p0/3043 | 1    | 1769 | 1764 | 2781 | 1    | 176<br>7 | 1963 | 297<br>9 |
| cb1573_c17/f1p1/3566                                                                                                                             | gnl BL_ORD_ID 28225<br>isoform=cb1573_c19;full_length_coverage=1;non_full_length_coverage=1;isoform_length=3913;expected_accuracy=0.996     | cb1573_c19/f1p1/3913     | 1217 | 3594 | 1    | 1220 | 1453 | 383<br>7 | 69   | 129<br>4 |
| cb8564_c183213/f1p3/3190<br>isoform=cb8564_c183213;full_length_coverage=1;non_full_length_coverage=3;isoform_length=3190;expected_accuracy=0.999 | gnl BL_ORD_ID 15728<br>isoform=cb8564_c69021;full_length_coverage=5;non_full_length_coverage=5;isoform_length=3899;expected_accuracy=1.000  | cb8564_c69021/f5p5/3899  | 1    | 2313 | 2318 | 3190 | 347  | 266<br>0 | 2987 | 384<br>8 |
| cb16752_c0/f4p2/1249<br>isoform=cb16752_c0;full_length_coverage=4;non_full_length_coverage=2;isoform_length=1249;expected_accuracy=1.000         | gnl BL_ORD_ID 43429<br>isoform=cb423_c5;full_length_coverage=1;non_full_length_coverage=0;isoform_length=2036;expected_accuracy=0.999       | cb423_c5/f1p0/2036       | 189  | 1249 | 3    | 191  | 975  | 203<br>6 | 15   | 204      |
| cb292_c24/f1p0/3303<br>isoform=cb292_c24;full_length_coverage=1;non_full_length_coverage=0;isoform_length=3303;expected_accuracy=0.991           | gnl BL_ORD_ID 38399<br>isoform=cb292_c6;full_length_coverage=1;non_full_length_coverage=0;isoform_length=4480;expected_accuracy=0.997       | cb292_c6/f1p0/4480       | 1484 | 3303 | 1    | 1488 | 2546 | 435<br>8 | 625  | 210<br>8 |
| cb12714_c29/f1p2/1583                                                                                                                            | gnl BL_ORD_ID 14796<br>isoform=cb8564_c24108;full_length_coverage=1;non_full_length_coverage=0;isoform_length=2227;expected_accuracy=0.999  | cb8564_c24108/f1p0/2227  | 1    | 1296 | 1293 | 1597 | 2    | 129<br>5 | 1867 | 217<br>1 |



|                          |                                                                                                                                                                                                                                               |      |      |      |      |      |      |      |      |
|--------------------------|-----------------------------------------------------------------------------------------------------------------------------------------------------------------------------------------------------------------------------------------------|------|------|------|------|------|------|------|------|
| cb8564_c121956/f1p0/2565 | ll_length_coverage=0;isoform_length=2227;expected_accuracy=0.993<br>gnl BL_ORD_ID 10058      cb8564_c119283/f1p1/2611<br>isoform=cb8564_c119283;full_length_coverage=1;non_full_length_coverage=1;isoform_length=2611;expected_accuracy=0.999 | 1048 | 2471 | 1    | 1048 | 1190 | 2611 | 1    | 1046 |
| cb8564_c70069/f1p0/2273  | gnl BL_ORD_ID 19157      cb8564_c90750/f1p0/2475<br>isoform=cb8564_c90750;full_length_coverage=1;non_full_length_coverage=0;isoform_length=2475;expected_accuracy=0.998                                                                       | 1    | 1762 | 1760 | 2275 | 31   | 1795 | 1898 | 2413 |
| cb8564_c90372/f1p0/2157  | gnl BL_ORD_ID 11600      cb8564_c128717/f3p4/2465<br>isoform=cb8564_c90372;full_length_coverage=1;non_full_length_coverage=0;isoform_length=2157;expected_accuracy=0.994                                                                      | 1    | 1092 | 1088 | 2157 | 91   | 1183 | 1355 | 2425 |
| cb8564_c126213/f1p0/1904 | gnl BL_ORD_ID 12129      cb8564_c146480/f11p0/2032<br>isoform=cb8564_c146480;full_length_coverage=11;non_full_length_coverage=0;isoform_length=2032;expected_accuracy=1.000                                                                   | 1    | 1585 | 1586 | 1805 | 35   | 1619 | 1801 | 2020 |
| cb8564_c41756/f1p0/2738  | gnl BL_ORD_ID 61972      cb12931_c30/f1p0/5903<br>isoform=cb8564_c41756;full_length_coverage=1;non_full_length_coverage=0;isoform_length=2738;expected_accuracy=0.996                                                                         | 1    | 2173 | 2170 | 2738 | 1    | 2177 | 2300 | 2868 |
| cb6719_c45/f1p0/1995     | gnl BL_ORD_ID 47668      cb6719_c58/f1p2/2659                                                                                                                                                                                                 | 276  | 2007 | 7    | 279  | 671  | 2404 | 75   | 348  |
| cb742_c31/f10p0/2606     | gnl BL_ORD_ID 50944      cb742_c26/f1p0/5447<br>isoform=cb742_c31;full_length_coverage=10;non_full_length_coverage=0;isoform_length=2606;expected_accuracy=0.999                                                                              | 631  | 2606 | 81   | 633  | 3057 | 5032 | 4    | 555  |

|                                                                                                                     |                                                                                                                  |                         |     |      |      |      |      |      |      |     |
|---------------------------------------------------------------------------------------------------------------------|------------------------------------------------------------------------------------------------------------------|-------------------------|-----|------|------|------|------|------|------|-----|
| length_coverage=0;isoform_length=2606;expected_accuracy=1.000                                                       |                                                                                                                  |                         |     |      |      |      |      |      |      |     |
| cb3450_c6/f1p0/2269                                                                                                 | gnl BL_ORD_ID 41482                                                                                              | cb3450_c1/f3p0/3084     |     |      |      |      |      |      |      |     |
| isoform=cb3450_c6;full_length_coverage=1;non_full_length_coverage=0;isoform_length=2269;expected_accuracy=0.997     | isoform=cb3450_c1;full_length_coverage=3;non_full_length_coverage=0;isoform_length=3084;expected_accuracy=1.000  |                         | 12  | 1623 | 1621 | 2216 | 97   | 170  | 2468 | 306 |
|                                                                                                                     |                                                                                                                  |                         |     |      |      |      |      | 2    |      | 4   |
| cb2707_c24/f1p0/2640                                                                                                | gnl BL_ORD_ID 38446                                                                                              | cb2707_c18/f1p1/3468    |     |      |      |      |      |      |      |     |
|                                                                                                                     | isoform=cb2707_c18;full_length_coverage=1;non_full_length_coverage=1;isoform_length=3468;expected_accuracy=0.997 |                         | 1   | 2430 | 2425 | 2649 | 304  | 273  | 3244 | 346 |
|                                                                                                                     |                                                                                                                  |                         |     |      |      |      |      | 3    |      | 8   |
| cb5432_c4/f1p1/1364                                                                                                 | gnl BL_ORD_ID 45887                                                                                              | cb5432_c1/f2p1/3036     |     |      |      |      |      |      |      |     |
| isoform=cb5432_c4;full_length_coverage=1;non_full_length_coverage=1;isoform_length=1364;expected_accuracy=0.996     | isoform=cb5432_c1;full_length_coverage=2;non_full_length_coverage=1;isoform_length=3036;expected_accuracy=1.000  |                         | 285 | 1362 | 46   | 286  | 1961 | 303  | 1    | 240 |
|                                                                                                                     |                                                                                                                  |                         |     |      |      |      |      | 6    |      |     |
| cb716_c1/f3p1/1472                                                                                                  | gnl BL_ORD_ID 4081                                                                                               | cb716_c10/f1p1/1798     |     |      |      |      |      |      |      |     |
| isoform=cb716_c1;full_length_coverage=3;non_full_length_coverage=1;isoform_length=1472;expected_accuracy=1.000      | isoform=cb716_c10;full_length_coverage=1;non_full_length_coverage=1;isoform_length=1798;expected_accuracy=0.995  |                         | 11  | 1182 | 1178 | 1472 | 1    | 1171 | 1474 | 176 |
|                                                                                                                     |                                                                                                                  |                         |     |      |      |      |      |      |      | 1   |
| cb8564_c86152/f1p2/2957                                                                                             | gnl BL_ORD_ID 57169                                                                                              | cb8564_c85269/f1p0/3455 |     |      |      |      |      |      |      |     |
| isoform=cb8564_c86152;full_length_coverage=1;non_full_length_coverage=2;isoform_length=2957;expected_accuracy=0.999 |                                                                                                                  |                         | 115 | 2957 | 1    | 114  | 225  | 306  | 1    | 114 |
|                                                                                                                     |                                                                                                                  |                         |     |      |      |      |      | 7    |      |     |
| cb6889_c6/f4p3/2381                                                                                                 | gnl BL_ORD_ID 47747                                                                                              | cb6889_c13/f1p0/2673    |     |      |      |      |      |      |      |     |
| isoform=cb6889_c6;full_length_coverage=4;non_full_length_coverage=3;isoform_length=2381;expected_accuracy=1.000     |                                                                                                                  |                         | 308 | 2375 | 59   | 313  | 588  | 265  | 1    | 255 |
|                                                                                                                     |                                                                                                                  |                         |     |      |      |      |      | 5    |      |     |

|                                                                                                                                                |                                                                                                                                                                      |     |      |      |      |     |      |      |      |
|------------------------------------------------------------------------------------------------------------------------------------------------|----------------------------------------------------------------------------------------------------------------------------------------------------------------------|-----|------|------|------|-----|------|------|------|
| cb8564_c40764/f1p0/2563<br>isoform=cb8564_c40764;full_length_coverage=1;non_full_length_coverage=0;isoform_length=2563;expected_accuracy=0.997 | gnl BL_ORD_ID 55607 cb8564_c46612/f1p1/3367                                                                                                                          | 1   | 2166 | 2162 | 2563 | 8   | 2169 | 2377 | 2778 |
| cb6608_c5/f1p1/2467<br>isoform=cb6608_c5;full_length_coverage=1;non_full_length_coverage=1;isoform_length=2467;expected_accuracy=0.993         | gnl BL_ORD_ID 5962 cb6608_c2/f2p0/3012<br>isoform=cb6608_c2;full_length_coverage=2;non_full_length_coverage=0;isoform_length=3012;expected_accuracy=0.997            | 233 | 2429 | 10   | 234  | 813 | 3012 | 3    | 227  |
| cb8564_c45596/f1p1/3430                                                                                                                        | gnl BL_ORD_ID 12535 cb8564_c132288/f2p0/3421<br>isoform=cb8564_c132288;full_length_coverage=2;non_full_length_coverage=0;isoform_length=3421;expected_accuracy=0.996 | 112 | 2780 | 2775 | 3378 | 1   | 2696 | 2816 | 3421 |
| cb14968_c1/f5p0/1289<br>isoform=cb14968_c1;full_length_coverage=5;non_full_length_coverage=0;isoform_length=1289;expected_accuracy=1.000       | gnl BL_ORD_ID 64376 cb14968_c10/f1p0/1444                                                                                                                            | 117 | 1287 | 1    | 117  | 235 | 1405 | 6    | 121  |
| cb3747_c11/f1p0/2520<br>isoform=cb3747_c11;full_length_coverage=1;non_full_length_coverage=0;isoform_length=2520;expected_accuracy=0.994       | gnl BL_ORD_ID 39693 cb3747_c15/f1p1/2985<br>isoform=cb3747_c15;full_length_coverage=1;non_full_length_coverage=1;isoform_length=2985;expected_accuracy=0.990         | 1   | 1743 | 1742 | 2520 | 10  | 1750 | 1985 | 2764 |
| cb7096_c28/f1p0/2545                                                                                                                           | gnl BL_ORD_ID 50336 cb7096_c16/f1p0/2638                                                                                                                             | 283 | 2570 | 86   | 284  | 316 | 2595 | 1    | 199  |
| cb8564_c46939/f1p1/2926                                                                                                                        | gnl BL_ORD_ID 55910 cb8564_c48645/f1p1/3287                                                                                                                          | 12  | 2134 | 2130 | 2870 | 17  | 2146 | 2251 | 2992 |
| cb8564_c118242/f1p2/3724<br>isoform=cb8564_c118242;full_length_coverage=1;non_                                                                 | gnl BL_ORD_ID 52933 cb8564_c112272/f1p0/3791                                                                                                                         | 121 | 2554 | 2550 | 3724 | 1   | 2428 | 2624 | 3798 |

|                                                                                                                      |                                                                                                                     |                          |     |      |      |      |      |      |      |      |
|----------------------------------------------------------------------------------------------------------------------|---------------------------------------------------------------------------------------------------------------------|--------------------------|-----|------|------|------|------|------|------|------|
| full_length_coverage=2;isoform_length=3724;expected_accuracy=0.990                                                   |                                                                                                                     |                          |     |      |      |      |      |      |      |      |
| cb3939_c16/f1p0/2356                                                                                                 | gnl BL_ORD_ID 39237                                                                                                 | cb3939_c13/f1p0/3298     |     |      |      |      |      |      |      |      |
| isoform=cb3939_c16;full_length_coverage=1;non_full_length_coverage=0;isoform_length=2356;expected_accuracy=0.992     | isoform=cb3939_c13;full_length_coverage=1;non_full_length_coverage=0;isoform_length=3298;expected_accuracy=0.997    |                          | 1   | 1186 | 1185 | 2315 | 6    | 1185 | 2148 | 3266 |
| cb18456_c1776/f1p0/1211                                                                                              | gnl BL_ORD_ID 36325                                                                                                 | cb18456_c1779/f1p1/1333  |     |      |      |      |      |      |      |      |
|                                                                                                                      | isoform=cb18456_c1779;full_length_coverage=1;non_full_length_coverage=1;isoform_length=1333;expected_accuracy=0.996 |                          | 280 | 1209 | 9    | 285  | 384  | 1333 | 2    | 271  |
| cb5274_c6/f1p1/2237                                                                                                  | gnl BL_ORD_ID 46078                                                                                                 | cb5274_c3/f1p1/3134      |     |      |      |      |      |      |      |      |
| isoform=cb5274_c6;full_length_coverage=1;non_full_length_coverage=1;isoform_length=2237;expected_accuracy=0.994      | isoform=cb5274_c3;full_length_coverage=1;non_full_length_coverage=1;isoform_length=3134;expected_accuracy=0.994     |                          | 1   | 1587 | 1585 | 2235 | 53   | 1625 | 2345 | 3006 |
| cb8564_c146097/f5p0/2205                                                                                             | gnl BL_ORD_ID 13817                                                                                                 | cb8564_c22336/f1p0/2652  |     |      |      |      |      |      |      |      |
| isoform=cb8564_c146097;full_length_coverage=5;non_full_length_coverage=0;isoform_length=2205;expected_accuracy=1.000 | isoform=cb8564_c22336;full_length_coverage=1;non_full_length_coverage=0;isoform_length=2652;expected_accuracy=0.996 |                          | 1   | 1749 | 1750 | 2178 | 30   | 1764 | 2219 | 2652 |
| cb2947_c0/f1p0/3761                                                                                                  | gnl BL_ORD_ID 70099                                                                                                 | cb2947_c16/f1p0/5590     |     |      |      |      |      |      |      |      |
|                                                                                                                      |                                                                                                                     |                          | 341 | 3557 | 1    | 342  | 2369 | 5585 | 54   | 395  |
| cb2662_c3/f1p0/3620                                                                                                  | gnl BL_ORD_ID 38855                                                                                                 | cb2662_c2/f1p0/3909      |     |      |      |      |      |      |      |      |
| isoform=cb2662_c3;full_length_coverage=1;non_full_length_coverage=0;isoform_length=3620;expected_accuracy=0.999      | isoform=cb2662_c2;full_length_coverage=1;non_full_length_coverage=0;isoform_length=3909;expected_accuracy=0.995     |                          | 1   | 2214 | 2211 | 3620 | 12   | 2227 | 2383 | 3792 |
| cb8564_c45440/f1p0/2458                                                                                              | gnl BL_ORD_ID 11125                                                                                                 | cb8564_c107332/f9p1/3308 |     |      |      |      |      |      |      |      |
| isoform=cb8564_c45440;full_length_coverage=1;non_f                                                                   | isoform=cb8564_c107332;full_length_coverage=9;non_f                                                                 |                          | 306 | 2458 | 4    | 310  | 1162 | 3300 | 1    | 306  |

|                                                                   |                                                                                                                                                                         |      |      |      |      |      |      |      |      |  |  |
|-------------------------------------------------------------------|-------------------------------------------------------------------------------------------------------------------------------------------------------------------------|------|------|------|------|------|------|------|------|--|--|
| ull_length_coverage=0;isoform_length=2458;expected_accuracy=0.992 | ull_length_coverage=1;isoform_length=3308;expected_accuracy=0.997                                                                                                       |      |      |      |      |      |      |      |      |  |  |
| cb8564_c23232/f1p3/2540                                           | gnl BL_ORD_ID 11988      cb8564_c13468/f1p0/3695<br>isoform=cb8564_c13468;full_length_coverage=1;non_full_length_coverage=0;isoform_length=3695;expected_accuracy=0.996 | 16   | 2172 | 2167 | 2402 | 10   | 2166 | 2268 | 2503 |  |  |
| cb8564_c24812/f1p0/2023                                           | gnl BL_ORD_ID 56609      cb8564_c48466/f1p0/2603<br>isoform=cb8564_c24812;full_length_coverage=1;non_full_length_coverage=0;isoform_length=2023;expected_accuracy=0.997 | 615  | 2004 | 81   | 619  | 1236 | 2626 | 1    | 540  |  |  |
| cb5667_c2/f3p2/2650                                               | gnl BL_ORD_ID 74259      cb5667_c10/f1p0/2842<br>isoform=cb5667_c2;full_length_coverage=3;non_full_length_coverage=2;isoform_length=2650;expected_accuracy=0.995        | 1135 | 2607 | 1    | 1135 | 1356 | 2826 | 6    | 1148 |  |  |
| cb8564_c37361/f1p0/3076                                           | gnl BL_ORD_ID 55521      cb8564_c44014/f1p0/3720<br>isoform=cb8564_c37361;full_length_coverage=1;non_full_length_coverage=0;isoform_length=3076;expected_accuracy=0.996 | 23   | 2481 | 2477 | 3070 | 40   | 2496 | 2597 | 3190 |  |  |
| cb8909_c12/f1p0/1836                                              | gnl BL_ORD_ID 20550      cb8909_c2/f3p0/1988<br>isoform=cb8909_c12;full_length_coverage=1;non_full_length_coverage=0;isoform_length=1836;expected_accuracy=1.000        | 1    | 1624 | 1620 | 1805 | 78   | 1702 | 1803 | 1988 |  |  |
| cb4016_c9/f1p1/2685                                               | gnl BL_ORD_ID 71723      cb4016_c11/f1p0/2688<br>isoform=cb4016_c9;full_length_coverage=1;non_full_length_coverage=1;isoform_length=2685;expected_accuracy=0.996        | 1    | 1921 | 1921 | 2616 | 4    | 1908 | 2016 | 2711 |  |  |
| cb5633_c78/f1p0/2529                                              | gnl BL_ORD_ID 74205      cb5633_c80/f1p0/2818<br>isoform=cb5633_c78;full_length_coverage=1;non_full_length_coverage=0;isoform_length=2529;expected_accuracy=0.996       | 16   | 1917 | 1912 | 2422 | 27   | 1922 | 2151 | 2656 |  |  |

|                          |                                                                                                                                                                          |      |      |      |      |      |      |      |      |
|--------------------------|--------------------------------------------------------------------------------------------------------------------------------------------------------------------------|------|------|------|------|------|------|------|------|
| cb8564_c38035/f1p0/2770  | gnl BL_ORD_ID 15315      cb8564_c39014/f1p0/3019<br>isoform=cb8564_c39014;full_length_coverage=1;non_full_length_coverage=0;isoform_length=3019;expected_accuracy=0.992  | 1    | 2035 | 2033 | 2755 | 1    | 2077 | 2273 | 3013 |
| cb8564_c1526/f1p0/1956   | gnl BL_ORD_ID 12063      cb8564_c1525/f1p0/2356<br>isoform=cb8564_c1526;full_length_coverage=1;non_full_length_coverage=0;isoform_length=1956;expected_accuracy=0.993    | 317  | 1956 | 71   | 317  | 708  | 2353 | 1    | 248  |
| cb8564_c15573/f1p0/3752  | gnl BL_ORD_ID 11490      cb8564_c145650/f1p1/3791<br>isoform=cb8564_c15573;full_length_coverage=1;non_full_length_coverage=0;isoform_length=3752;expected_accuracy=0.997 | 1    | 2900 | 2896 | 3593 | 40   | 2970 | 3086 | 3791 |
| cb8564_c41756/f1p0/2738  | gnl BL_ORD_ID 54403      cb8564_c35093/f1p5/2916<br>isoform=cb8564_c41756;full_length_coverage=1;non_full_length_coverage=0;isoform_length=2738;expected_accuracy=0.996  | 2    | 2173 | 2170 | 2738 | 20   | 2195 | 2318 | 2885 |
| cb8564_c44850/f1p0/3916  | gnl BL_ORD_ID 55445      cb8564_c41831/f1p0/4874<br>isoform=cb8564_c44850;full_length_coverage=1;non_full_length_coverage=0;isoform_length=3916;expected_accuracy=0.993  | 1846 | 3842 | 1    | 1846 | 1991 | 3987 | 61   | 1890 |
| cb51_c21/f1p0/2442       | gnl BL_ORD_ID 46998      cb51_c0/f6p0/2663<br>isoform=cb51_c21;full_length_coverage=1;non_full_length_coverage=0;isoform_length=2442;expected_accuracy=0.995             | 1    | 2129 | 2129 | 2442 | 46   | 2171 | 2310 | 2624 |
| cb8564_c178999/f1p0/2222 | gnl BL_ORD_ID 16681      cb8564_c54233/f1p1/3194<br>isoform=cb8564_c178999;full_length_coverage=1;non_                                                                   | 1    | 1778 | 1773 | 2217 | 3    | 1791 | 2748 | 3194 |

|                                                                    |                                                                                                                                                                         |     |      |      |      |      |      |      |      |
|--------------------------------------------------------------------|-------------------------------------------------------------------------------------------------------------------------------------------------------------------------|-----|------|------|------|------|------|------|------|
| full_length_coverage=0;isoform_length=2222;expected_accuracy=0.994 | ll_length_coverage=1;isoform_length=3194;expected_accuracy=0.995                                                                                                        |     |      |      |      |      |      |      |      |
| cb12714_c29/f1p2/1583                                              | gnl BL_ORD_ID 13595      cb8564_c22212/f1p0/2530<br>isoform=cb8564_c22212;full_length_coverage=1;non_full_length_coverage=0;isoform_length=2530;expected_accuracy=0.992 | 1   | 1296 | 1293 | 1532 | 1    | 1296 | 2291 | 2530 |
| cb5137_c53/f1p0/2672                                               | gnl BL_ORD_ID 41994      cb5137_c96/f1p2/2956<br>isoform=cb5137_c53;full_length_coverage=1;non_full_length_coverage=0;isoform_length=2672;expected_accuracy=0.992       | 14  | 2565 | 2562 | 2670 | 155  | 2715 | 2849 | 2956 |
| cb12714_c29/f1p2/1583                                              | gnl BL_ORD_ID 13302      cb8564_c19160/f1p2/2687<br>isoform=cb8564_c19160;full_length_coverage=1;non_full_length_coverage=2;isoform_length=2687;expected_accuracy=0.990 | 1   | 1296 | 1293 | 1589 | 1    | 1327 | 2392 | 2687 |
| cb1030_c0/f14p0/2912                                               | gnl BL_ORD_ID 47255      cb1030_c32/f1p0/3185<br>isoform=cb1030_c0;full_length_coverage=14;non_full_length_coverage=0;isoform_length=2912;expected_accuracy=1.000       | 1   | 1855 | 1853 | 2912 | 4    | 1866 | 2020 | 3073 |
| cb105_c15/f1p0/2861                                                | gnl BL_ORD_ID 368      cb105_c10/f1p0/4473<br>isoform=cb105_c10;full_length_coverage=1;non_full_length_coverage=0;isoform_length=4473;expected_accuracy=0.992           | 1   | 1911 | 1910 | 2789 | 1615 | 3518 | 3618 | 4473 |
| cb12714_c31/f1p3/1578                                              | gnl BL_ORD_ID 9350      cb8564_c11826/f1p0/2916<br>isoform=cb12714_c31;full_length_coverage=1;non_full_length_coverage=3;isoform_length=1578;expected_accuracy=0.991    | 282 | 1578 | 3    | 283  | 1543 | 2833 | 1022 | 1296 |

|                       |                                                                                                                                                                       |     |      |      |      |      |          |      |          |
|-----------------------|-----------------------------------------------------------------------------------------------------------------------------------------------------------------------|-----|------|------|------|------|----------|------|----------|
| cb2527_c40/f1p0/3341  | gnl BL_ORD_ID 38907      cb2527_c49/f15p2/3322<br>isoform=cb2527_c49;full_length_coverage=15;non_full_length_coverage=2;isoform_length=3322;expected_accuracy=1.000   | 24  | 2505 | 2505 | 3050 | 135  | 262<br>7 | 2777 | 332<br>2 |
| cb12714_c29/f1p2/1583 | gnl BL_ORD_ID 56670      cb8564_c51772/f1p0/2859                                                                                                                      | 1   | 1296 | 1293 | 1548 | 1    | 129<br>7 | 2409 | 266<br>4 |
| cb5258_c4/f2p0/1009   | gnl BL_ORD_ID 46339      cb5258_c2/f1p0/3657<br>isoform=cb5258_c4;full_length_coverage=2;non_full_length_coverage=0;isoform_length=1009;expected_accuracy=1.000       | 391 | 1009 | 8    | 393  | 2542 | 316<br>7 | 1    | 386      |
| cb8662_c5/f1p0/2097   | gnl BL_ORD_ID 17389      cb8662_c2/f1p0/2305<br>isoform=cb8662_c5;full_length_coverage=1;non_full_length_coverage=0;isoform_length=2097;expected_accuracy=1.000       | 1   | 1527 | 1528 | 2096 | 18   | 157<br>2 | 1737 | 230<br>5 |
| cb12931_c15/f1p0/1493 | gnl BL_ORD_ID 14844      cb8564_c36689/f1p1/2368<br>isoform=cb12931_c15;full_length_coverage=1;non_full_length_coverage=0;isoform_length=1493;expected_accuracy=1.000 | 1   | 1106 | 1104 | 1488 | 1    | 1105     | 1984 | 236<br>8 |
| cb246_c3/f1p3/3304    | gnl BL_ORD_ID 68112      cb246_c8/f1p2/3603<br>isoform=cb246_c3;full_length_coverage=1;non_full_length_coverage=3;isoform_length=3304;expected_accuracy=0.997         | 10  | 2715 | 2712 | 3291 | 7    | 271<br>2 | 2883 | 346<br>2 |
| cb500_c17/f1p0/2323   | gnl BL_ORD_ID 72247      cb500_c49/f1p0/3666<br>isoform=cb500_c17;full_length_coverage=1;non_full_length_coverage=0;isoform_length=2323;expected_accuracy=0.997       | 1   | 1293 | 1288 | 2321 | 900  | 216<br>7 | 2299 | 333<br>2 |



|                                                                                                                                                |                                                                                                                                                                   |     |      |      |      |     |      |      |      |
|------------------------------------------------------------------------------------------------------------------------------------------------|-------------------------------------------------------------------------------------------------------------------------------------------------------------------|-----|------|------|------|-----|------|------|------|
| cb5896_c51/f1p0/2173<br>isoform=cb5896_c51;full_length_coverage=1;non_full_length_coverage=0;isoform_length=2173;expected_accuracy=1.000       | gnl BL_ORD_ID 44481      cb5896_c50/f1p0/2391<br>isoform=cb5896_c50;full_length_coverage=1;non_full_length_coverage=0;isoform_length=2391;expected_accuracy=0.997 | 1   | 1371 | 1370 | 2173 | 7   | 1378 | 1591 | 2380 |
| cb6063_c13/f1p1/2429                                                                                                                           | gnl BL_ORD_ID 74844      cb6063_c11/f1p1/3128                                                                                                                     | 119 | 2325 | 1    | 120  | 662 | 2866 | 161  | 280  |
| cb8564_c45300/f1p4/3014<br>isoform=cb8564_c45300;full_length_coverage=1;non_full_length_coverage=4;isoform_length=3014;expected_accuracy=0.996 | gnl BL_ORD_ID 55377      cb8564_c39822/f1p0/3306                                                                                                                  | 243 | 3014 | 1    | 246  | 399 | 3168 | 1    | 242  |
| cb2674_c18/f1p2/3873<br>isoform=cb2674_c18;full_length_coverage=1;non_full_length_coverage=2;isoform_length=3873;expected_accuracy=0.998       | gnl BL_ORD_ID 38116      cb2674_c9/f1p2/4073<br>isoform=cb2674_c9;full_length_coverage=1;non_full_length_coverage=2;isoform_length=4073;expected_accuracy=0.993   | 1   | 2622 | 2623 | 3873 | 58  | 2679 | 2807 | 4063 |
| cb6716_c4/f1p0/2291                                                                                                                            | gnl BL_ORD_ID 47664      cb6716_c3/f1p0/2637                                                                                                                      | 1   | 1816 | 1815 | 2239 | 3   | 1818 | 2079 | 2503 |
| cb2533_c28/f1p0/3624                                                                                                                           | gnl BL_ORD_ID 38533      cb2533_c16/f1p0/4039<br>isoform=cb2533_c16;full_length_coverage=1;non_full_length_coverage=0;isoform_length=4039;expected_accuracy=0.994 | 1   | 2640 | 2639 | 3230 | 201 | 2836 | 3451 | 4039 |
| cb2804_c101/f1p0/2548<br>isoform=cb2804_c101;full_length_coverage=1;non_full_length_coverage=0;isoform_length=2548;expected_accuracy=0.995     | gnl BL_ORD_ID 38356      cb2804_c93/f1p0/3636<br>isoform=cb2804_c93;full_length_coverage=1;non_full_length_coverage=0;isoform_length=3636;expected_accuracy=0.991 | 132 | 2548 | 1    | 135  | 858 | 3262 | 1    | 131  |
| cb7506_c3/f1p0/2275                                                                                                                            | gnl BL_ORD_ID 7930      cb7506_c0/f1p0/2600<br>isoform=cb7506_c0;full_length_coverage=1;non_full_length_coverage=0;isoform_length=2600;expected_accuracy=0.997    | 1   | 1972 | 1975 | 2263 | 430 | 2398 | 2290 | 2583 |

|                         |                                                                                                                                                                                                                                                 |      |      |      |      |      |      |      |      |
|-------------------------|-------------------------------------------------------------------------------------------------------------------------------------------------------------------------------------------------------------------------------------------------|------|------|------|------|------|------|------|------|
| cb7442_c32/f1p0/1813    | ngth_coverage=0;isoform_length=2600;expected_accuracy=0.999<br>gnl BL_ORD_ID 8272                      cb7442_c31/f1p0/1802<br>isoform=cb7442_c31;full_length_coverage=1;non_full_length_coverage=0;isoform_length=1802;expected_accuracy=0.993 | 1    | 1401 | 1399 | 1669 | 20   | 1420 | 1532 | 1802 |
| cb8564_c91851/f1p1/2644 | gnl BL_ORD_ID 9350                      cb8564_c11826/f1p0/2916<br>isoform=cb8564_c91851;full_length_coverage=1;non_full_length_coverage=1;isoform_length=2644;expected_accuracy=0.993                                                          | 1    | 1295 | 1294 | 2644 | 4    | 1296 | 1543 | 2910 |
| cb3999_c3/f4p0/1978     | gnl BL_ORD_ID 39622                      cb3999_c22/f1p0/2445<br>isoform=cb3999_c3;full_length_coverage=4;non_full_length_coverage=0;isoform_length=1978;expected_accuracy=1.000                                                                | 1    | 1305 | 1305 | 1882 | 1    | 1305 | 1868 | 2445 |
| cb16997_c99/f1p0/3209   | gnl BL_ORD_ID 31274                      cb16997_c23/f1p0/6285<br>isoform=cb16997_c99;full_length_coverage=1;non_full_length_coverage=0;isoform_length=3209;expected_accuracy=0.993                                                             | 1518 | 3209 | 1    | 1521 | 4347 | 6035 | 21   | 1541 |
| cb8564_c9882/f2p0/2918  | gnl BL_ORD_ID 13661                      cb8564_c21127/f1p0/3234<br>isoform=cb8564_c9882;full_length_coverage=2;non_full_length_coverage=0;isoform_length=2918;expected_accuracy=0.999                                                          | 1    | 1742 | 1737 | 2887 | 4    | 1742 | 2084 | 3234 |
| cb8564_c608/f6p2/2608   | gnl BL_ORD_ID 9903                      cb8564_c1073/f1p1/3199<br>isoform=cb8564_c608;full_length_coverage=6;non_full_length_coverage=2;isoform_length=2608;expected_accuracy=1.000                                                             | 12   | 1433 | 1430 | 2608 | 1    | 1424 | 2019 | 3197 |

|                                                                                                                                                |                                                                                                                                                                         |     |      |      |      |     |      |      |      |
|------------------------------------------------------------------------------------------------------------------------------------------------|-------------------------------------------------------------------------------------------------------------------------------------------------------------------------|-----|------|------|------|-----|------|------|------|
| cb8564_c39546/f1p2/3023                                                                                                                        | gnl BL_ORD_ID 16172      cb8564_c53024/f1p0/3159<br>isoform=cb8564_c53024;full_length_coverage=1;non_full_length_coverage=0;isoform_length=3159;expected_accuracy=0.996 | 1   | 1700 | 1697 | 2841 | 1   | 1699 | 2017 | 3159 |
| cb5960_c4/f1p0/2967                                                                                                                            | gnl BL_ORD_ID 74707      cb5960_c9/f1p0/3444                                                                                                                            | 12  | 1974 | 1972 | 2596 | 99  | 2061 | 2806 | 3430 |
| cb1462_c20/f1p0/3600<br>isoform=cb1462_c20;full_length_coverage=1;non_full_length_coverage=0;isoform_length=3600;expected_accuracy=0.995       | gnl BL_ORD_ID 28515      cb1462_c7/f1p0/3911<br>isoform=cb1462_c7;full_length_coverage=1;non_full_length_coverage=0;isoform_length=3911;expected_accuracy=0.993         | 167 | 3518 | 1    | 167  | 579 | 3909 | 141  | 319  |
| cb8564_c44698/f1p5/2843<br>isoform=cb8564_c44698;full_length_coverage=1;non_full_length_coverage=5;isoform_length=2843;expected_accuracy=0.997 | gnl BL_ORD_ID 55433      cb8564_c41572/f1p1/3265                                                                                                                        | 1   | 2516 | 2511 | 2833 | 1   | 2504 | 2623 | 2952 |
| cb8992_c2/f1p0/1469<br>isoform=cb8992_c2;full_length_coverage=1;non_full_length_coverage=0;isoform_length=1469;expected_accuracy=0.996         | gnl BL_ORD_ID 21307      cb8992_c1/f1p0/2472<br>isoform=cb8992_c1;full_length_coverage=1;non_full_length_coverage=0;isoform_length=2472;expected_accuracy=0.996         | 1   | 1016 | 1015 | 1469 | 1   | 1015 | 1920 | 2373 |
| cb8564_c40598/f1p4/3119                                                                                                                        | gnl BL_ORD_ID 55472      cb8564_c42531/f1p0/3996                                                                                                                        | 127 | 2732 | 2729 | 3051 | 816 | 3420 | 3541 | 3863 |
| cb8564_c91948/f1p0/3509                                                                                                                        | gnl BL_ORD_ID 17316      cb8564_c81235/f1p0/3279<br>isoform=cb8564_c81235;full_length_coverage=1;non_full_length_coverage=0;isoform_length=3279;expected_accuracy=0.999 | 13  | 2139 | 2142 | 3059 | 11  | 2140 | 2362 | 3279 |
| cb6277_c19/f1p1/2357<br>isoform=cb6277_c19;full_length_coverage=1;non_full_length_coverage=0;isoform_length=2357;expected_accuracy=0.999       | gnl BL_ORD_ID 4096      cb6277_c14/f1p1/2588<br>isoform=cb6277_c14;full_length_coverage=1;non_full_length_coverage=0;isoform_length=2588;expected_accuracy=0.999        | 177 | 2338 | 1    | 178  | 430 | 2588 | 152  | 328  |

|                                                                                                                                                                                                           |                                                                                                                                                                                                                                                  |     |      |      |      |      |     |      |     |
|-----------------------------------------------------------------------------------------------------------------------------------------------------------------------------------------------------------|--------------------------------------------------------------------------------------------------------------------------------------------------------------------------------------------------------------------------------------------------|-----|------|------|------|------|-----|------|-----|
| length_coverage=1;isoform_length=2357;expected_accuracy=0.995<br>cb2242_c14/f1p0/1775<br>isoform=cb2242_c14;full_length_coverage=1;non_full_length_coverage=0;isoform_length=1775;expected_accuracy=0.992 | length_coverage=1;isoform_length=2588;expected_accuracy=0.995<br>gnl BL_ORD_ID 36765                      cb2242_c1/f4p0/1990<br>isoform=cb2242_c1;full_length_coverage=4;non_full_length_coverage=0;isoform_length=1990;expected_accuracy=1.000 | 1   | 1489 | 1484 | 1764 | 56   | 154 | 1710 | 199 |
| cb8450_c0/f1p0/2366<br>isoform=cb8450_c0;full_length_coverage=1;non_full_length_coverage=0;isoform_length=2366;expected_accuracy=0.993                                                                    | gnl BL_ORD_ID 11010                      cb8450_c1/f1p0/2835<br>isoform=cb8450_c1;full_length_coverage=1;non_full_length_coverage=0;isoform_length=2835;expected_accuracy=0.991                                                                  | 1   | 1957 | 1955 | 2293 | 7    | 196 | 2499 | 283 |
| cb8637_c55/f1p0/1852<br>isoform=cb8637_c55;full_length_coverage=1;non_full_length_coverage=0;isoform_length=1852;expected_accuracy=0.991                                                                  | gnl BL_ORD_ID 18514                      cb8637_c28/f1p0/1911<br>isoform=cb8637_c28;full_length_coverage=1;non_full_length_coverage=0;isoform_length=1911;expected_accuracy=0.994                                                                | 678 | 1840 | 74   | 681  | 716  | 187 | 1    | 608 |
| cb9230_c7/f1p0/1014                                                                                                                                                                                       | gnl BL_ORD_ID 19942                      cb9230_c3/f1p0/2239<br>isoform=cb9230_c3;full_length_coverage=1;non_full_length_coverage=0;isoform_length=2239;expected_accuracy=0.993                                                                  | 187 | 991  | 1    | 189  | 1064 | 186 | 24   | 210 |
| cb8564_c17220/f1p1/3235                                                                                                                                                                                   | gnl BL_ORD_ID 12196                      cb8564_c12654/f2p0/4122<br>isoform=cb8564_c12654;full_length_coverage=2;non_full_length_coverage=0;isoform_length=4122;expected_accuracy=1.000                                                          | 1   | 1901 | 1901 | 3157 | 1    | 190 | 2784 | 404 |
| cb15992_c0/f1p0/1875                                                                                                                                                                                      | gnl BL_ORD_ID 36216                      cb1854_c8/f1p0/2451<br>isoform=cb1854_c8;full_length_coverage=1;non_full_length_coverage=0;isoform_length=2451;expected_accuracy=0.994                                                                  | 435 | 1889 | 5    | 436  | 943  | 241 | 1    | 432 |

|                                                                                                                                                |                                                                                                                                                              |     |      |      |      |     |      |      |      |
|------------------------------------------------------------------------------------------------------------------------------------------------|--------------------------------------------------------------------------------------------------------------------------------------------------------------|-----|------|------|------|-----|------|------|------|
| cb8564_c37361/f1p0/3076                                                                                                                        | gnl BL_ORD_ID 55522 cb8564_c44123/f1p1/3230                                                                                                                  | 15  | 2481 | 2477 | 3070 | 15  | 2478 | 2579 | 3171 |
| cb8916_c33/f12p1/1738<br>isoform=cb8916_c33;full_length_coverage=12;non_full_length_coverage=1;isoform_length=1738;expected_accuracy=1.000     | gnl BL_ORD_ID 19815 cb8916_c26/f1p0/1759<br>isoform=cb8916_c26;full_length_coverage=1;non_full_length_coverage=0;isoform_length=1759;expected_accuracy=0.999 | 229 | 1698 | 33   | 231  | 289 | 1759 | 1    | 187  |
| cb8564_c129474/f1p0/1983                                                                                                                       | gnl BL_ORD_ID 53245 cb8564_c119806/f1p0/2166                                                                                                                 | 1   | 1448 | 1443 | 1881 | 69  | 1516 | 1650 | 2088 |
| cb8925_c12/f1p0/1705<br>isoform=cb8925_c12;full_length_coverage=1;non_full_length_coverage=0;isoform_length=1705;expected_accuracy=0.995       | gnl BL_ORD_ID 19880 cb8925_c6/f1p2/1925<br>isoform=cb8925_c6;full_length_coverage=1;non_full_length_coverage=2;isoform_length=1925;expected_accuracy=1.000   | 1   | 1312 | 1307 | 1705 | 1   | 1290 | 1392 | 1790 |
| cb8564_c36056/f1p0/2652<br>isoform=cb8564_c36056;full_length_coverage=1;non_full_length_coverage=0;isoform_length=2652;expected_accuracy=0.999 | gnl BL_ORD_ID 55596 cb8564_c46321/f1p2/2987                                                                                                                  | 248 | 2638 | 1    | 251  | 483 | 2873 | 87   | 339  |
| cb8564_c44698/f1p5/2843<br>isoform=cb8564_c44698;full_length_coverage=1;non_full_length_coverage=5;isoform_length=2843;expected_accuracy=0.997 | gnl BL_ORD_ID 55464 cb8564_c42285/f1p0/3370                                                                                                                  | 1   | 2516 | 2511 | 2830 | 1   | 2511 | 2632 | 2953 |
| cb11915_c17/f1p1/1371<br>isoform=cb11915_c17;full_length_coverage=1;non_full_length_coverage=1;isoform_length=1371;expected_accuracy=0.993     | gnl BL_ORD_ID 52316 cb8564_c117940/f1p0/1903                                                                                                                 | 442 | 1348 | 7    | 446  | 940 | 1846 | 1    | 441  |
| cb1945_c12/f1p2/4118<br>isoform=cb1945_c12;full_length_coverage=1;non_full_length_coverage=1;isoform_length=4118;expected_accuracy=0.999       | gnl BL_ORD_ID 34797 cb1945_c5/f1p2/4276<br>isoform=cb1945_c5;full_length_coverage=1;non_full_length_coverage=1;isoform_length=4276;expected_accuracy=0.999   | 229 | 4118 | 20   | 231  | 399 | 4274 | 73   | 286  |

|                                                                                                                                                                                                           |                                                                                                                                                                    |     |      |      |      |      |      |      |      |
|-----------------------------------------------------------------------------------------------------------------------------------------------------------------------------------------------------------|--------------------------------------------------------------------------------------------------------------------------------------------------------------------|-----|------|------|------|------|------|------|------|
| length_coverage=2;isoform_length=4118;expected_accuracy=0.999<br>cb2389_c15/f1p0/2930<br>isoform=cb2389_c15;full_length_coverage=1;non_full_length_coverage=0;isoform_length=2930;expected_accuracy=0.994 | length_coverage=2;isoform_length=4276;expected_accuracy=0.999<br>gnl BL_ORD_ID 68486 cb2389_c9/f1p0/3504                                                           | 1   | 2471 | 2471 | 2930 | 53   | 2519 | 2699 | 3158 |
| cb7495_c10/f3p2/2201<br>isoform=cb7495_c10;full_length_coverage=3;non_full_length_coverage=2;isoform_length=2201;expected_accuracy=0.998                                                                  | gnl BL_ORD_ID 6886 cb7495_c3/f1p5/2591<br>isoform=cb7495_c3;full_length_coverage=1;non_full_length_coverage=5;isoform_length=2591;expected_accuracy=0.999          | 99  | 2201 | 2    | 103  | 268  | 2367 | 1    | 102  |
| cb8564_c35890/f1p0/3157                                                                                                                                                                                   | gnl BL_ORD_ID 18906 cb8564_c90449/f1p3/3223<br>isoform=cb8564_c90449;full_length_coverage=1;non_full_length_coverage=3;isoform_length=3223;expected_accuracy=0.996 | 270 | 2836 | 1    | 271  | 640  | 3206 | 26   | 296  |
| cb10222_c5/f1p0/1560                                                                                                                                                                                      | gnl BL_ORD_ID 48246 cb10222_c2/f1p0/3592                                                                                                                           | 269 | 1489 | 38   | 272  | 2382 | 3602 | 1    | 235  |
| cb4163_c10/f1p0/2735<br>isoform=cb4163_c10;full_length_coverage=1;non_full_length_coverage=0;isoform_length=2735;expected_accuracy=0.995                                                                  | gnl BL_ORD_ID 71845 cb4163_c5/f1p0/3401                                                                                                                            | 1   | 1840 | 1841 | 2730 | 46   | 1885 | 2032 | 2924 |
| cb8564_c177939/f1p0/1977<br>isoform=cb8564_c177939;full_length_coverage=1;non_full_length_coverage=0;isoform_length=1977;expected_accuracy=1.000                                                          | gnl BL_ORD_ID 54766 cb8564_c2448/f1p0/2648                                                                                                                         | 1   | 1724 | 1723 | 1975 | 1    | 1722 | 2314 | 2566 |
| cb9864_c0/f1p0/1948<br>isoform=cb9864_c0;full_length_coverage=1;non_full_length_coverage=0;isoform_length=1948;expected_accuracy=1.000                                                                    | gnl BL_ORD_ID 21236 cb9864_c1/f1p0/2873<br>isoform=cb9864_c1;full_length_coverage=1;non_full_length_coverage=0;isoform_length=2873;expected_accuracy=1.000         | 1   | 1338 | 1336 | 1948 | 1    | 1338 | 1839 | 2451 |

|                                                                                                                                                                                                       |                                                                                                                                                                                                                                                |     |      |      |      |      |          |      |          |
|-------------------------------------------------------------------------------------------------------------------------------------------------------------------------------------------------------|------------------------------------------------------------------------------------------------------------------------------------------------------------------------------------------------------------------------------------------------|-----|------|------|------|------|----------|------|----------|
| ngth_coverage=0;isoform_length=1948;expected_accuracy=0.995<br>cb3586_c3/f1p0/2988<br>isoform=cb3586_c3;full_length_coverage=1;non_full_length_coverage=0;isoform_length=2988;expected_accuracy=0.993 | ngth_coverage=0;isoform_length=2873;expected_accuracy=0.995<br>gnl BL_ORD_ID 41149                      cb3586_c2/f1p0/3545<br>isoform=cb3586_c2;full_length_coverage=1;non_full_length_coverage=0;isoform_length=3545;expected_accuracy=0.998 | 293 | 2988 | 2    | 295  | 820  | 349<br>5 | 54   | 356      |
| cb8564_c22900/f1p1/3151<br>isoform=cb8564_c22900;full_length_coverage=1;non_full_length_coverage=1;isoform_length=3151;expected_accuracy=0.994                                                        | gnl BL_ORD_ID 17251                      cb8564_c93761/f8p4/3293<br>isoform=cb8564_c93761;full_length_coverage=8;non_full_length_coverage=4;isoform_length=3293;expected_accuracy=0.998                                                        | 15  | 1750 | 1746 | 3146 | 1    | 173<br>1 | 1892 | 329<br>3 |
| cb4077_c12/f1p0/1303<br>isoform=cb4077_c12;full_length_coverage=1;non_full_length_coverage=0;isoform_length=1303;expected_accuracy=0.991                                                              | gnl BL_ORD_ID 39141                      cb4077_c6/f1p0/3369<br>isoform=cb4077_c6;full_length_coverage=1;non_full_length_coverage=0;isoform_length=3369;expected_accuracy=0.997                                                                | 115 | 1275 | 10   | 114  | 2210 | 336<br>9 | 1    | 108      |
| cb8564_c157909/f1p2/2084<br>isoform=cb8564_c157909;full_length_coverage=1;non_full_length_coverage=2;isoform_length=2084;expected_accuracy=0.999                                                      | gnl BL_ORD_ID 13447                      cb8564_c22344/f1p0/2596<br>isoform=cb8564_c22344;full_length_coverage=1;non_full_length_coverage=0;isoform_length=2596;expected_accuracy=0.996                                                        | 11  | 1503 | 1502 | 2083 | 1    | 149<br>2 | 2015 | 259<br>6 |
| cb3341_c8/f1p0/1832<br>isoform=cb3341_c8;full_length_coverage=1;non_full_length_coverage=0;isoform_length=1832;expected_accuracy=0.996                                                                | gnl BL_ORD_ID 41612                      cb3341_c7/f1p0/2281<br>isoform=cb3341_c7;full_length_coverage=1;non_full_length_coverage=0;isoform_length=2281;expected_accuracy=0.996                                                                | 1   | 1048 | 1046 | 1819 | 1    | 104<br>5 | 1512 | 228<br>1 |
| cb8564_c53036/f1p0/2917<br>isoform=cb8564_c53036;full_length_coverage=1;non_full_length_coverage=0;isoform_length=2917;expected_accuracy=0.999                                                        | gnl BL_ORD_ID 14064                      cb8564_c44301/f1p0/3723<br>isoform=cb8564_c44301;full_length_coverage=1;non_full_length_coverage=0;isoform_length=3723;expected_accuracy=0.995                                                        | 235 | 2900 | 1    | 238  | 1060 | 372<br>3 | 1    | 238      |

|                                                                                                                                                |                                                                                                                                                                             |      |      |      |      |      |          |      |          |
|------------------------------------------------------------------------------------------------------------------------------------------------|-----------------------------------------------------------------------------------------------------------------------------------------------------------------------------|------|------|------|------|------|----------|------|----------|
| cb5772_c4/f3p1/1610<br>isoform=cb5772_c4;full_length_coverage=3;non_full_length_coverage=1;isoform_length=1610;expected_accuracy=1.000         | gnl BL_ORD_ID 74412 cb5772_c6/f1p0/2531                                                                                                                                     | 370  | 1606 | 43   | 371  | 1304 | 254<br>1 | 1    | 327      |
| cb8564_c45882/f1p0/3354                                                                                                                        | gnl BL_ORD_ID 48479 cb10398_c17/f1p0/5753                                                                                                                                   | 1    | 2021 | 2019 | 3199 | 584  | 260<br>4 | 4060 | 524<br>0 |
| cb12003_c142/f1p2/1168<br>isoform=cb12003_c142;full_length_coverage=1;non_full_length_coverage=2;isoform_length=1168;expected_accuracy=0.996   | gnl BL_ORD_ID 22350          cb12003_c33/f1p0/1360<br>isoform=cb12003_c33;full_length_coverage=1;non_full_length_coverage=0;isoform_length=1360;expected_accuracy=0.993     | 254  | 1163 | 3    | 254  | 407  | 131<br>7 | 2    | 250      |
| cb8564_c70588/f1p0/2189<br>isoform=cb8564_c70588;full_length_coverage=1;non_full_length_coverage=0;isoform_length=2189;expected_accuracy=0.994 | gnl BL_ORD_ID 16435          cb8564_c69070/f2p0/2710<br>isoform=cb8564_c69070;full_length_coverage=2;non_full_length_coverage=0;isoform_length=2710;expected_accuracy=0.997 | 1    | 1196 | 1195 | 2189 | 2    | 1195     | 1716 | 271<br>0 |
| cb7863_c23/f1p0/2057<br>isoform=cb7863_c23;full_length_coverage=1;non_full_length_coverage=0;isoform_length=2057;expected_accuracy=0.998       | gnl BL_ORD_ID 50766 cb7863_c14/f1p0/2372                                                                                                                                    | 264  | 2044 | 88   | 268  | 574  | 235<br>4 | 111  | 291      |
| cb3744_c16/f1p0/2234                                                                                                                           | gnl BL_ORD_ID 39623          cb3744_c17/f1p2/3148<br>isoform=cb3744_c17;full_length_coverage=1;non_full_length_coverage=2;isoform_length=3148;expected_accuracy=0.999       | 1    | 1429 | 1424 | 1922 | 172  | 159<br>9 | 2565 | 306<br>4 |
| cb953_c5/f1p0/2793                                                                                                                             | gnl BL_ORD_ID 20814          cb953_c3/f1p1/3159<br>isoform=cb953_c3;full_length_coverage=1;non_full_length_coverage=1;isoform_length=3159;expected_accuracy=0.994           | 1098 | 2645 | 1    | 1102 | 1611 | 315<br>9 | 18   | 1116     |



|                                                                                                                                                  |                                                                                                                                                                         |      |      |      |      |      |      |      |      |
|--------------------------------------------------------------------------------------------------------------------------------------------------|-------------------------------------------------------------------------------------------------------------------------------------------------------------------------|------|------|------|------|------|------|------|------|
| cb8564_c31910/f18p7/4258<br>isoform=cb8564_c31910;full_length_coverage=18;non_full_length_coverage=7;isoform_length=4258;expected_accuracy=1.000 | gnl BL_ORD_ID 13238      cb8564_c19346/f1p3/4270<br>isoform=cb8564_c19346;full_length_coverage=1;non_full_length_coverage=3;isoform_length=4270;expected_accuracy=0.995 | 2097 | 4257 | 121  | 2097 | 2112 | 4270 | 1    | 1970 |
| cb8760_c0/f3p0/1017<br>isoform=cb8760_c0;full_length_coverage=3;non_full_length_coverage=0;isoform_length=1017;expected_accuracy=1.000           | gnl BL_ORD_ID 58346      cb8760_c2/f1p0/2371                                                                                                                            | 157  | 994  | 1    | 158  | 1199 | 2031 | 1    | 160  |
| cb938_c12/f1p0/3486<br>isoform=cb938_c12;full_length_coverage=1;non_full_length_coverage=0;isoform_length=3486;expected_accuracy=0.996           | gnl BL_ORD_ID 59101      cb938_c9/f1p0/4170                                                                                                                             | 1    | 2585 | 2585 | 3486 | 1    | 2565 | 3262 | 4161 |
| cb8564_c43779/f1p0/3021<br>isoform=cb8564_c43779;full_length_coverage=1;non_full_length_coverage=0;isoform_length=3021;expected_accuracy=0.993   | gnl BL_ORD_ID 14411      cb8564_c44258/f1p0/3202<br>isoform=cb8564_c44258;full_length_coverage=1;non_full_length_coverage=0;isoform_length=3202;expected_accuracy=0.993 | 2    | 2344 | 2345 | 3011 | 3    | 2376 | 2535 | 3202 |
| cb1955_c26/f2p1/2336<br>isoform=cb1955_c26;full_length_coverage=2;non_full_length_coverage=1;isoform_length=2336;expected_accuracy=1.000         | gnl BL_ORD_ID 36339      cb1955_c43/f2p0/2634<br>isoform=cb1955_c43;full_length_coverage=2;non_full_length_coverage=0;isoform_length=2634;expected_accuracy=1.000       | 1    | 1569 | 1567 | 2335 | 1    | 1579 | 1858 | 2634 |
| cb1306_c36/f1p0/2164<br>isoform=cb1306_c36;full_length_coverage=1;non_full_length_coverage=0;isoform_length=2164;expected_accuracy=1.000         | gnl BL_ORD_ID 25572      cb1306_c1/f7p1/3196<br>isoform=cb1306_c1;full_length_coverage=7;non_full_length_coverage=1;isoform_length=3196;expected_accuracy=0.997         | 1    | 1793 | 1788 | 2164 | 106  | 1895 | 2820 | 3196 |
| cb1333_c76/f1p0/3569                                                                                                                             | gnl BL_ORD_ID 26655      cb1333_c7/f6p1/4935<br>isoform=cb1333_c7;full_length_coverage=6;non_full_length_coverage=0;isoform_length=4935;expected_accuracy=0.995         | 1    | 1784 | 1782 | 3554 | 1    | 1790 | 3135 | 4910 |

|                                                                                                                      |                                                                                                                     |     |      |      |      |      |          |      |          |  |
|----------------------------------------------------------------------------------------------------------------------|---------------------------------------------------------------------------------------------------------------------|-----|------|------|------|------|----------|------|----------|--|
|                                                                                                                      | ngth_coverage=1;isoform_length=4935;expected_accuracy=1.000                                                         |     |      |      |      |      |          |      |          |  |
| cb5022_c0/f4p0/3002                                                                                                  |                                                                                                                     |     |      |      |      |      |          |      |          |  |
| isoform=cb5022_c0;full_length_coverage=4;non_full_length_coverage=0;isoform_length=3002;expected_accuracy=1.000      | gnl BL_ORD_ID 73204 cb5022_c7/f1p0/3286                                                                             | 154 | 3002 | 11   | 155  | 257  | 310<br>7 | 1    | 144      |  |
| cb8564_c84130/f1p2/3574                                                                                              | gnl BL_ORD_ID 14727 cb8564_c37594/f3p1/3734                                                                         |     |      |      |      |      |          |      |          |  |
| isoform=cb8564_c84130;full_length_coverage=1;non_full_length_coverage=2;isoform_length=3574;expected_accuracy=0.995  | isoform=cb8564_c37594;full_length_coverage=3;non_full_length_coverage=1;isoform_length=3734;expected_accuracy=0.999 | 125 | 3514 | 1    | 127  | 317  | 370<br>4 | 18   | 145      |  |
| cb8564_c47839/f1p0/4186                                                                                              | gnl BL_ORD_ID 14377 cb8564_c36097/f1p2/3430                                                                         |     |      |      |      |      |          |      |          |  |
|                                                                                                                      | isoform=cb8564_c36097;full_length_coverage=1;non_full_length_coverage=2;isoform_length=3430;expected_accuracy=0.996 | 131 | 1870 | 1870 | 3263 | 130  | 186<br>5 | 1995 | 338<br>4 |  |
| cb2747_c7/f1p3/3310                                                                                                  | gnl BL_ORD_ID 68803 cb2747_c3/f1p0/3786                                                                             | 1   | 2315 | 2311 | 3243 | 6    | 232<br>0 | 2741 | 367<br>3 |  |
| cb965_c18/f1p0/2545                                                                                                  | gnl BL_ORD_ID 20095 cb965_c5/f2p7/4283                                                                              |     |      |      |      |      |          |      |          |  |
| isoform=cb965_c18;full_length_coverage=1;non_full_length_coverage=0;isoform_length=2545;expected_accuracy=1.000      | isoform=cb965_c5;full_length_coverage=2;non_full_length_coverage=7;isoform_length=4283;expected_accuracy=1.000      | 1   | 1828 | 1827 | 2544 | 1499 | 332<br>5 | 3550 | 426<br>8 |  |
| cb8564_c115454/f1p0/3174                                                                                             |                                                                                                                     |     |      |      |      |      |          |      |          |  |
| isoform=cb8564_c115454;full_length_coverage=1;non_full_length_coverage=0;isoform_length=3174;expected_accuracy=0.995 | gnl BL_ORD_ID 54602 cb8564_c127814/f1p0/3705                                                                        | 216 | 3174 | 10   | 220  | 624  | 358<br>2 | 1    | 207      |  |
| cb2831_c26/f1p0/2685                                                                                                 | gnl BL_ORD_ID 38321 cb2831_c8/f2p0/3387                                                                             |     |      |      |      |      |          |      |          |  |
|                                                                                                                      | isoform=cb2831_c8;full_length_coverage=2;non_full_length_coverage=0;isoform_length=3387;expected_accuracy=0.995     | 1   | 2172 | 2173 | 2480 | 67   | 223<br>8 | 3072 | 338<br>0 |  |



|                                                                                                                                              |                                                                                                                                            |                         |      |      |      |      |      |          |      |          |
|----------------------------------------------------------------------------------------------------------------------------------------------|--------------------------------------------------------------------------------------------------------------------------------------------|-------------------------|------|------|------|------|------|----------|------|----------|
| cb5773_c1/f5p0/2852<br>isoform=cb5773_c1;full_length_coverage=5;non_full_length_coverage=0;isoform_length=2852;expected_accuracy=1.000       | gnl BL_ORD_ID 46835<br>isoform=cb5773_c5;full_length_coverage=1;non_full_length_coverage=0;isoform_length=3003;expected_accuracy=0.999     | cb5773_c5/f1p0/3003     | 151  | 2852 | 1    | 151  | 307  | 300<br>2 | 1    | 145      |
| cb8564_c4930/f4p1/3125<br>isoform=cb8564_c4930;full_length_coverage=4;non_full_length_coverage=1;isoform_length=3125;expected_accuracy=0.999 | gnl BL_ORD_ID 57405<br>isoform=cb8564_c92124/f1p0/3563                                                                                     | cb8564_c92124/f1p0/3563 | 469  | 2973 | 6    | 471  | 1043 | 354<br>7 | 9    | 474      |
| cb3888_c4/f1p0/3311<br>isoform=cb3888_c4;full_length_coverage=1;non_full_length_coverage=0;isoform_length=3311;expected_accuracy=0.993       | gnl BL_ORD_ID 40212<br>isoform=cb3888_c3;full_length_coverage=1;non_full_length_coverage=0;isoform_length=3359;expected_accuracy=0.995     | cb3888_c3/f1p0/3359     | 226  | 3206 | 1    | 226  | 375  | 335<br>9 | 1    | 226      |
| cb2889_c6/f1p0/3520                                                                                                                          | gnl BL_ORD_ID 36512<br>isoform=cb2889_c4;full_length_coverage=1;non_full_length_coverage=0;isoform_length=3702;expected_accuracy=0.998     | cb2889_c4/f1p0/3702     | 1363 | 3377 | 1    | 1368 | 1689 | 370<br>2 | 69   | 143<br>6 |
| cb8564_c23645/f1p0/2729                                                                                                                      | gnl BL_ORD_ID 12425<br>isoform=cb8564_c15273;full_length_coverage=1;non_full_length_coverage=0;isoform_length=2696;expected_accuracy=0.991 | cb8564_c15273/f1p0/2696 | 1    | 2066 | 2062 | 2493 | 2    | 208<br>6 | 2219 | 264<br>3 |
| cb9533_c10/f1p0/1798<br>isoform=cb9533_c10;full_length_coverage=1;non_full_length_coverage=0;isoform_length=1798;expected_accuracy=0.994     | gnl BL_ORD_ID 21716<br>isoform=cb9533_c6;full_length_coverage=1;non_full_length_coverage=0;isoform_length=3583;expected_accuracy=0.998     | cb9533_c6/f1p0/3583     | 309  | 1798 | 74   | 313  | 1998 | 348<br>7 | 83   | 322      |
| cb2599_c18/f1p0/3075                                                                                                                         | gnl BL_ORD_ID 37160<br>isoform=cb2599_c7;full_length_coverage=1;non_full_length_coverage=0;isoform_length=3217;expected_accuracy=0.998     | cb2599_c7/f1p0/3217     | 282  | 3047 | 125  | 284  | 454  | 321<br>7 | 1    | 157      |

|                                                                                                                  |                                                                                                                     |                         |     |      |      |      |     |      |      |     |
|------------------------------------------------------------------------------------------------------------------|---------------------------------------------------------------------------------------------------------------------|-------------------------|-----|------|------|------|-----|------|------|-----|
| cb3485_c9/f1p0/2043                                                                                              | gnl BL_ORD_ID 40920                                                                                                 | cb3485_c8/f1p0/2724     | 365 | 2043 | 4    | 365  | 895 | 258  | 2    | 365 |
| isoform=cb3485_c9;full_length_coverage=1;non_full_length_coverage=0;isoform_length=2043;expected_accuracy=0.993  | isoform=cb3485_c8;full_length_coverage=1;non_full_length_coverage=0;isoform_length=2724;expected_accuracy=0.991     |                         |     |      |      |      |     | 9    |      |     |
| cb7263_c20/f1p0/2377                                                                                             | gnl BL_ORD_ID 8081                                                                                                  | cb7263_c14/f3p0/2616    | 1   | 2167 | 2162 | 2366 | 43  | 2211 | 2412 | 261 |
| isoform=cb7263_c20;full_length_coverage=1;non_full_length_coverage=0;isoform_length=2377;expected_accuracy=1.000 | isoform=cb7263_c14;full_length_coverage=3;non_full_length_coverage=0;isoform_length=2616;expected_accuracy=1.000    |                         |     |      |      |      |     |      |      | 6   |
| cb6391_c3/f2p0/2237                                                                                              | gnl BL_ORD_ID 3495                                                                                                  | cb6391_c11/f1p0/2658    | 125 | 2237 | 1    | 127  | 520 | 262  | 122  | 246 |
| isoform=cb6391_c3;full_length_coverage=2;non_full_length_coverage=0;isoform_length=2237;expected_accuracy=0.994  | isoform=cb6391_c11;full_length_coverage=1;non_full_length_coverage=0;isoform_length=2658;expected_accuracy=0.993    |                         |     |      |      |      |     | 7    |      |     |
| cb8564_c40598/f1p4/3119                                                                                          | gnl BL_ORD_ID 15924                                                                                                 | cb8564_c52804/f1p5/3221 | 1   | 2732 | 2729 | 3071 | 1   | 272  | 2850 | 319 |
|                                                                                                                  | isoform=cb8564_c52804;full_length_coverage=1;non_full_length_coverage=5;isoform_length=3221;expected_accuracy=0.999 |                         |     |      |      |      |     | 9    |      | 2   |
| cb6298_c2/f1p0/2038                                                                                              | gnl BL_ORD_ID 3607                                                                                                  | cb6298_c1/f1p0/2892     | 1   | 1564 | 1562 | 2038 | 74  | 163  | 2286 | 276 |
| isoform=cb6298_c2;full_length_coverage=1;non_full_length_coverage=0;isoform_length=2038;expected_accuracy=0.991  | isoform=cb6298_c1;full_length_coverage=1;non_full_length_coverage=0;isoform_length=2892;expected_accuracy=0.995     |                         |     |      |      |      |     | 8    |      | 5   |
| cb3248_c3/f1p0/2838                                                                                              | gnl BL_ORD_ID 70262                                                                                                 | cb3248_c1/f1p0/3306     | 1   | 1884 | 1883 | 2822 | 2   | 188  | 2355 | 329 |
|                                                                                                                  |                                                                                                                     |                         |     |      |      |      |     | 5    |      | 4   |
| cb8564_c15653/f1p4/2475                                                                                          | gnl BL_ORD_ID 55553                                                                                                 | cb8564_c45006/f1p1/2724 | 22  | 2293 | 2289 | 2433 | 31  | 229  | 2518 | 266 |
|                                                                                                                  |                                                                                                                     |                         |     |      |      |      |     | 9    |      | 2   |

|                                                                                                                                                  |                                                                                                                                                                         |      |      |      |      |      |      |      |      |
|--------------------------------------------------------------------------------------------------------------------------------------------------|-------------------------------------------------------------------------------------------------------------------------------------------------------------------------|------|------|------|------|------|------|------|------|
| cb8564_c44474/f1p1/3915<br>isoform=cb8564_c44474;full_length_coverage=1;non_full_length_coverage=1;isoform_length=3915;expected_accuracy=0.996   | gnl BL_ORD_ID 15868      cb8564_c47725/f1p0/4368<br>isoform=cb8564_c47725;full_length_coverage=1;non_full_length_coverage=0;isoform_length=4368;expected_accuracy=0.995 | 1    | 2090 | 2089 | 3821 | 3    | 2080 | 2608 | 4346 |
| cb8564_c128725/f1p1/2771<br>isoform=cb8564_c128725;full_length_coverage=1;non_full_length_coverage=1;isoform_length=2771;expected_accuracy=1.000 | gnl BL_ORD_ID 17161      cb8564_c87466/f1p1/3006<br>isoform=cb8564_c87466;full_length_coverage=1;non_full_length_coverage=1;isoform_length=3006;expected_accuracy=0.994 | 1    | 2669 | 2664 | 2771 | 1    | 2697 | 2811 | 2921 |
| cb309_c7/f1p2/4109<br>isoform=cb309_c7;full_length_coverage=1;non_full_length_coverage=2;isoform_length=4109;expected_accuracy=0.997             | gnl BL_ORD_ID 69546      cb309_c5/f1p0/4669                                                                                                                             | 1    | 3739 | 3740 | 4073 | 186  | 3918 | 4253 | 4585 |
| cb3543_c6/f1p0/2439                                                                                                                              | gnl BL_ORD_ID 70446      cb3543_c4/f1p0/3845                                                                                                                            | 1    | 1561 | 1559 | 2051 | 11   | 1570 | 3099 | 3591 |
| cb3570_c10/f1p0/2945<br>isoform=cb3570_c10;full_length_coverage=1;non_full_length_coverage=0;isoform_length=2945;expected_accuracy=0.991         | gnl BL_ORD_ID 39906      cb3570_c7/f1p0/3031<br>isoform=cb3570_c7;full_length_coverage=1;non_full_length_coverage=0;isoform_length=3031;expected_accuracy=0.997         | 285  | 2943 | 1    | 282  | 381  | 3029 | 1    | 274  |
| cb626_c52/f1p0/4764                                                                                                                              | gnl BL_ORD_ID 47167      cb626_c79/f1p0/5202                                                                                                                            | 1921 | 4416 | 190  | 1926 | 2580 | 5074 | 1    | 1739 |
| cb8564_c659/f1p3/2696<br>isoform=cb8564_c659;full_length_coverage=1;non_full_length_coverage=3;isoform_length=2696;expected_accuracy=0.990       | gnl BL_ORD_ID 55047      cb8564_c4680/f1p0/2928                                                                                                                         | 249  | 2682 | 1    | 253  | 385  | 2801 | 1    | 250  |
| cb1613_c5/f1p0/2054<br>isoform=cb1613_c5;full_length_coverage=1;non_full_length_coverage=1;isoform_length=2054;expected_accuracy=0.996           | gnl BL_ORD_ID 30939      cb1613_c11/f1p0/2425<br>isoform=cb1613_c11;full_length_coverage=1;non_full_length_coverage=1;isoform_length=2425;expected_accuracy=0.996       | 1    | 1200 | 1198 | 2052 | 12   | 1191 | 1569 | 2421 |

|                                                                                                                                                                                                               |                                                                                                                                                                    |      |      |      |      |      |          |      |          |
|---------------------------------------------------------------------------------------------------------------------------------------------------------------------------------------------------------------|--------------------------------------------------------------------------------------------------------------------------------------------------------------------|------|------|------|------|------|----------|------|----------|
| ngth_coverage=0;isoform_length=2054;expected_accuracy=1.000<br>cb8564_c36056/f1p0/2652<br>isoform=cb8564_c36056;full_length_coverage=1;non_full_length_coverage=0;isoform_length=2652;expected_accuracy=0.999 | ength_coverage=0;isoform_length=2425;expected_accuracy=0.996<br><br>gnl BL_ORD_ID 56602 cb8564_c48192/f1p6/3029                                                    | 248  | 2652 | 1    | 251  | 468  | 287<br>2 | 70   | 324      |
| cb8564_c11997/f1p2/2670                                                                                                                                                                                       | gnl BL_ORD_ID 14058 cb8564_c23936/f1p0/3016<br>isoform=cb8564_c23936;full_length_coverage=1;non_full_length_coverage=0;isoform_length=3016;expected_accuracy=0.995 | 1    | 1713 | 1711 | 2584 | 4    | 171<br>6 | 2143 | 301<br>6 |
| cb15973_c0/f4p0/1082<br>isoform=cb15973_c0;full_length_coverage=4;non_full_length_coverage=0;isoform_length=1082;expected_accuracy=0.992                                                                      | gnl BL_ORD_ID 29028 cb15973_c1/f1p0/1135<br>isoform=cb15973_c1;full_length_coverage=1;non_full_length_coverage=0;isoform_length=1135;expected_accuracy=0.999       | 430  | 1082 | 55   | 430  | 476  | 1128     | 1    | 376      |
| cb6597_c35/f1p1/2276                                                                                                                                                                                          | gnl BL_ORD_ID 49853 cb6597_c19/f1p0/3033                                                                                                                           | 1019 | 2147 | 1    | 1019 | 1938 | 306<br>6 | 3    | 102<br>0 |
| cb6540_c5/f1p1/1737<br>isoform=cb6540_c5;full_length_coverage=1;non_full_length_coverage=1;isoform_length=1737;expected_accuracy=0.998                                                                        | gnl BL_ORD_ID 5261 cb6540_c3/f1p0/2887<br>isoform=cb6540_c3;full_length_coverage=1;non_full_length_coverage=0;isoform_length=2887;expected_accuracy=0.998          | 1    | 1001 | 1002 | 1657 | 1    | 100<br>2 | 2231 | 288<br>7 |
| cb4016_c32/f1p0/1913                                                                                                                                                                                          | gnl BL_ORD_ID 39428 cb4016_c42/f1p1/2580<br>isoform=cb4016_c42;full_length_coverage=1;non_full_length_coverage=1;isoform_length=2580;expected_accuracy=0.993       | 191  | 1930 | 25   | 194  | 734  | 247<br>1 | 137  | 308      |
| cb8564_c44698/f1p5/2843<br>isoform=cb8564_c44698;full_length_coverage=1;non_f                                                                                                                                 | gnl BL_ORD_ID 57175 cb8564_c85646/f1p0/3480                                                                                                                        | 18   | 2516 | 2511 | 2818 | 106  | 260<br>0 | 2721 | 303<br>0 |

|                                                                                                                      |                                                                                                                      |                          |     |      |      |      |     |     |      |     |  |
|----------------------------------------------------------------------------------------------------------------------|----------------------------------------------------------------------------------------------------------------------|--------------------------|-----|------|------|------|-----|-----|------|-----|--|
| ull_length_coverage=5;isoform_length=2843;expected_accuracy=0.997                                                    |                                                                                                                      |                          |     |      |      |      |     |     |      |     |  |
| cb8564_c181853/f1p0/2119                                                                                             | gnl BL_ORD_ID 9418                                                                                                   | cb8564_c119193/f1p2/2975 |     |      |      |      |     |     |      |     |  |
| isoform=cb8564_c181853;full_length_coverage=1;non_full_length_coverage=0;isoform_length=2119;expected_accuracy=0.997 | isoform=cb8564_c119193;full_length_coverage=1;non_full_length_coverage=2;isoform_length=2975;expected_accuracy=0.998 |                          | 1   | 1339 | 1334 | 2116 | 1   | 135 | 2186 | 297 |  |
| cb8564_c2326/f1p0/2006                                                                                               |                                                                                                                      |                          |     |      |      |      |     | 2   |      | 5   |  |
| isoform=cb8564_c2326;full_length_coverage=1;non_full_length_coverage=0;isoform_length=2006;expected_accuracy=0.990   | gnl BL_ORD_ID 53847                                                                                                  | cb8564_c2458/f1p0/2930   | 230 | 2006 | 8    | 234  | 719 | 249 | 12   | 241 |  |
|                                                                                                                      |                                                                                                                      |                          |     |      |      |      |     | 2   |      |     |  |
| cb6111_c18/f1p0/1808                                                                                                 | gnl BL_ORD_ID 45375                                                                                                  | cb6111_c11/f2p0/2025     |     |      |      |      |     |     |      |     |  |
|                                                                                                                      | isoform=cb6111_c11;full_length_coverage=2;non_full_length_coverage=0;isoform_length=2025;expected_accuracy=1.000     |                          | 290 | 1600 | 7    | 292  | 715 | 202 | 120  | 404 |  |
|                                                                                                                      |                                                                                                                      |                          |     |      |      |      |     | 5   |      |     |  |
| cb8564_c17220/f1p1/3235                                                                                              | gnl BL_ORD_ID 13377                                                                                                  | cb8564_c22091/f2p0/3351  |     |      |      |      |     |     |      |     |  |
|                                                                                                                      | isoform=cb8564_c22091;full_length_coverage=2;non_full_length_coverage=0;isoform_length=3351;expected_accuracy=0.997  |                          | 1   | 1681 | 1678 | 3157 | 1   | 168 | 1805 | 328 |  |
|                                                                                                                      |                                                                                                                      |                          |     |      |      |      |     | 2   |      | 4   |  |
| cb6517_c67/f1p2/2665                                                                                                 | gnl BL_ORD_ID 49791                                                                                                  | cb6517_c27/f1p0/2894     | 222 | 2649 | 1    | 219  | 346 | 276 | 1    | 220 |  |
|                                                                                                                      |                                                                                                                      |                          |     |      |      |      |     | 8   |      |     |  |
| cb3057_c0/f4p0/1599                                                                                                  | gnl BL_ORD_ID 37411                                                                                                  | cb3057_c1/f2p0/2029      |     |      |      |      |     |     |      |     |  |
| isoform=cb3057_c0;full_length_coverage=4;non_full_length_coverage=0;isoform_length=1599;expected_accuracy=0.999      | isoform=cb3057_c1;full_length_coverage=2;non_full_length_coverage=0;isoform_length=2029;expected_accuracy=0.999      |                          | 346 | 1585 | 63   | 348  | 791 | 202 | 1    | 284 |  |
|                                                                                                                      |                                                                                                                      |                          |     |      |      |      |     | 9   |      |     |  |
| cb2838_c1/f1p0/2301                                                                                                  | gnl BL_ORD_ID 37790                                                                                                  | cb2838_c2/f1p0/2336      |     |      |      |      |     |     |      |     |  |
| isoform=cb2838_c1;full_length_coverage=1;non_full_length_coverage=0;isoform_length=2301;expected_accuracy=0.999      | isoform=cb2838_c2;full_length_coverage=1;non_full_length_coverage=0;isoform_length=2336;expected_accuracy=0.999      |                          | 100 | 1544 | 1543 | 2301 | 1   | 144 | 1576 | 233 |  |
|                                                                                                                      |                                                                                                                      |                          |     |      |      |      |     | 6   |      | 6   |  |



|                                                                                                                                                                                                                                                                                                                                                                                                                                                                                                                                                                                                                                                                                                                                                                                                                                              |                                                                                                                                                                                                                                                                                                                                                                                                                                                                                                                                                                                                                                                                                                                                                                                                                                                   |                                |                                              |                                         |                                            |                                   |                                              |                                         |                                            |
|----------------------------------------------------------------------------------------------------------------------------------------------------------------------------------------------------------------------------------------------------------------------------------------------------------------------------------------------------------------------------------------------------------------------------------------------------------------------------------------------------------------------------------------------------------------------------------------------------------------------------------------------------------------------------------------------------------------------------------------------------------------------------------------------------------------------------------------------|---------------------------------------------------------------------------------------------------------------------------------------------------------------------------------------------------------------------------------------------------------------------------------------------------------------------------------------------------------------------------------------------------------------------------------------------------------------------------------------------------------------------------------------------------------------------------------------------------------------------------------------------------------------------------------------------------------------------------------------------------------------------------------------------------------------------------------------------------|--------------------------------|----------------------------------------------|-----------------------------------------|--------------------------------------------|-----------------------------------|----------------------------------------------|-----------------------------------------|--------------------------------------------|
| ngth_coverage=0;isoform_length=2301;expected_accuracy=0.996<br>cb8564_c44698/f1p5/2843<br>isoform=cb8564_c44698;full_length_coverage=1;non_full_length_coverage=5;isoform_length=2843;expected_accuracy=0.997<br>cb7560_c35/f1p1/2004<br>isoform=cb7560_c35;full_length_coverage=1;non_full_length_coverage=1;isoform_length=2004;expected_accuracy=0.994<br>cb8564_c86230/f1p0/2481<br>isoform=cb8564_c86230;full_length_coverage=1;non_full_length_coverage=0;isoform_length=2481;expected_accuracy=0.993<br>cb8564_c41363/f1p0/2861<br>isoform=cb8564_c41363;full_length_coverage=1;non_full_length_coverage=0;isoform_length=2861;expected_accuracy=0.997<br>cb8564_c78992/f1p0/2856<br>cb8564_c108411/f1p1/3146<br>isoform=cb8564_c108411;full_length_coverage=1;non_full_length_coverage=1;isoform_length=3146;expected_accuracy=0.991 | ngth_coverage=0;isoform_length=2336;expected_accuracy=1.000<br>gnl BL_ORD_ID 54698 cb8564_c155298/f3p9/3822<br>gnl BL_ORD_ID 51343 cb7560_c37/f1p0/2673<br>gnl BL_ORD_ID 16238 cb8564_c75535/f2p0/3461<br>isoform=cb8564_c75535;full_length_coverage=2;non_full_length_coverage=0;isoform_length=3461;expected_accuracy=0.990<br>gnl BL_ORD_ID 17053 cb8564_c74966/f1p0/3265<br>isoform=cb8564_c74966;full_length_coverage=1;non_full_length_coverage=0;isoform_length=3265;expected_accuracy=0.992<br>gnl BL_ORD_ID 12600 cb8564_c137667/f2p2/2686<br>isoform=cb8564_c137667;full_length_coverage=2;non_full_length_coverage=2;isoform_length=2686;expected_accuracy=0.996<br>gnl BL_ORD_ID 10077 cb8564_c11751/f1p1/3395<br>isoform=cb8564_c11751;full_length_coverage=1;non_full_length_coverage=1;isoform_length=3395;expected_accuracy=0.995 | 1<br>1<br>455<br>1<br>196<br>1 | 2516<br>1446<br>2480<br>2122<br>2645<br>2012 | 2511<br>1444<br>59<br>2123<br>1<br>2012 | 2828<br>1996<br>456<br>2859<br>196<br>3146 | 1<br>230<br>1051<br>1<br>82<br>52 | 2513<br>1677<br>3051<br>2129<br>2533<br>2038 | 2634<br>1924<br>1<br>2529<br>20<br>2190 | 2953<br>2476<br>388<br>3265<br>214<br>3316 |
|----------------------------------------------------------------------------------------------------------------------------------------------------------------------------------------------------------------------------------------------------------------------------------------------------------------------------------------------------------------------------------------------------------------------------------------------------------------------------------------------------------------------------------------------------------------------------------------------------------------------------------------------------------------------------------------------------------------------------------------------------------------------------------------------------------------------------------------------|---------------------------------------------------------------------------------------------------------------------------------------------------------------------------------------------------------------------------------------------------------------------------------------------------------------------------------------------------------------------------------------------------------------------------------------------------------------------------------------------------------------------------------------------------------------------------------------------------------------------------------------------------------------------------------------------------------------------------------------------------------------------------------------------------------------------------------------------------|--------------------------------|----------------------------------------------|-----------------------------------------|--------------------------------------------|-----------------------------------|----------------------------------------------|-----------------------------------------|--------------------------------------------|

|                                                                                                                                                |                                                                                                                                                                                         |     |      |      |      |      |          |      |          |
|------------------------------------------------------------------------------------------------------------------------------------------------|-----------------------------------------------------------------------------------------------------------------------------------------------------------------------------------------|-----|------|------|------|------|----------|------|----------|
| cb8564_c3432/f1p0/2118                                                                                                                         | gnl BL_ORD_ID 54626 cb8564_c128456/f1p0/2321                                                                                                                                            | 619 | 2090 | 7    | 623  | 739  | 221<br>0 | 7    | 623      |
| cb3362_c27/f1p0/2905<br>isoform=cb3362_c27;full_length_coverage=1;non_full_length_coverage=0;isoform_length=2905;expected_accuracy=0.995       | gnl BL_ORD_ID 39772                      cb3362_c35/f1p3/3531<br>isoform=cb3362_c35;full_length_coverage=1;non_full_length_coverage=3;isoform_length=3531;expected_accuracy=0.996       | 1   | 1996 | 1997 | 2905 | 15   | 202<br>2 | 2587 | 349<br>7 |
| cb2927_c11/f1p2/2856<br>isoform=cb2927_c11;full_length_coverage=1;non_full_length_coverage=2;isoform_length=2856;expected_accuracy=0.997       | gnl BL_ORD_ID 37697                      cb2927_c6/f1p1/3514<br>isoform=cb2927_c6;full_length_coverage=1;non_full_length_coverage=1;isoform_length=3514;expected_accuracy=0.996         | 1   | 1689 | 1685 | 2840 | 21   | 1711     | 2359 | 351<br>4 |
| cb8564_c53551/f3p3/2373<br>isoform=cb8564_c53551;full_length_coverage=3;non_full_length_coverage=3;isoform_length=2373;expected_accuracy=1.000 | gnl BL_ORD_ID 14582                      cb8564_c41536/f1p0/3183<br>isoform=cb8564_c41536;full_length_coverage=1;non_full_length_coverage=0;isoform_length=3183;expected_accuracy=0.996 | 1   | 1304 | 1302 | 2314 | 3    | 130<br>5 | 2171 | 318<br>3 |
| cb8564_c48473/f1p2/2701<br>isoform=cb8564_c48473;full_length_coverage=1;non_full_length_coverage=2;isoform_length=2701;expected_accuracy=0.999 | gnl BL_ORD_ID 56712 cb8564_c53711/f1p0/3201                                                                                                                                             | 220 | 2701 | 1    | 225  | 406  | 288<br>6 | 37   | 262      |
| cb9351_c2/f1p0/1990                                                                                                                            | gnl BL_ORD_ID 15293                      cb8564_c25416/f2p0/1980<br>isoform=cb8564_c25416;full_length_coverage=2;non_full_length_coverage=0;isoform_length=1980;expected_accuracy=0.994 | 744 | 1878 | 83   | 745  | 1167 | 33       | 1980 | 131<br>7 |
| cb313_c26/f1p0/3095<br>isoform=cb313_c26;full_length_coverage=1;non_full_length_coverage=0;isoform_length=3095;expected_accuracy=0.996         | gnl BL_ORD_ID 38275                      cb313_c7/f1p0/4354<br>isoform=cb313_c7;full_length_coverage=1;non_full_length_coverage=0;isoform_length=4354;expected_accuracy=0.994           | 126 | 2072 | 2070 | 3095 | 1    | 194<br>5 | 3217 | 424<br>4 |

|                                                                                                                                                |                                                                                                                                             |                          |      |      |      |      |      |      |      |      |
|------------------------------------------------------------------------------------------------------------------------------------------------|---------------------------------------------------------------------------------------------------------------------------------------------|--------------------------|------|------|------|------|------|------|------|------|
| cb6111_c34/f1p0/1434<br>isoform=cb6111_c34;full_length_coverage=1;non_full_length_coverage=0;isoform_length=1434;expected_accuracy=0.992       | gnl BL_ORD_ID 44806<br>isoform=cb6111_c6;full_length_coverage=3;non_full_length_coverage=1;isoform_length=1599;expected_accuracy=1.000      | cb6111_c6/f3p1/1599      | 121  | 1388 | 1    | 122  | 330  | 1599 | 43   | 166  |
| cb8564_c78968/f1p1/3043<br>isoform=cb8564_c78968;full_length_coverage=1;non_full_length_coverage=1;isoform_length=3043;expected_accuracy=0.996 | gnl BL_ORD_ID 11491<br>isoform=cb8564_c147498;full_length_coverage=6;non_full_length_coverage=0;isoform_length=3283;expected_accuracy=0.997 | cb8564_c147498/f6p0/3283 | 244  | 3043 | 1    | 246  | 482  | 3281 | 40   | 284  |
| cb2737_c42/f1p0/2881                                                                                                                           | gnl BL_ORD_ID 36571<br>isoform=cb2737_c54;full_length_coverage=1;non_full_length_coverage=0;isoform_length=3029;expected_accuracy=0.995     | cb2737_c54/f1p0/3029     | 18   | 1799 | 1800 | 2632 | 222  | 1998 | 2110 | 2936 |
| cb8564_c88543/f1p0/3439<br>isoform=cb8564_c88543;full_length_coverage=1;non_full_length_coverage=0;isoform_length=3439;expected_accuracy=0.996 | gnl BL_ORD_ID 13600<br>isoform=cb8564_c21527;full_length_coverage=7;non_full_length_coverage=0;isoform_length=3631;expected_accuracy=1.000  | cb8564_c21527/f7p0/3631  | 235  | 3439 | 2    | 240  | 397  | 3588 | 34   | 273  |
| cb3253_c0/f2p0/2494<br>isoform=cb3253_c0;full_length_coverage=2;non_full_length_coverage=0;isoform_length=2494;expected_accuracy=1.000         | gnl BL_ORD_ID 41324<br>isoform=cb3253_c1;full_length_coverage=1;non_full_length_coverage=0;isoform_length=3675;expected_accuracy=0.997      | cb3253_c1/f1p0/3675      | 1190 | 2491 | 1    | 1194 | 2374 | 3675 | 1    | 1194 |
| cb8564_c41756/f1p0/2738<br>isoform=cb8564_c41756;full_length_coverage=1;non_full_length_coverage=0;isoform_length=2738;expected_accuracy=0.996 | gnl BL_ORD_ID 16795<br>isoform=cb8564_c73428;full_length_coverage=1;non_full_length_coverage=0;isoform_length=2966;expected_accuracy=0.994  | cb8564_c73428/f1p0/2966  | 1    | 2173 | 2170 | 2738 | 7    | 2182 | 2400 | 2965 |
| cb6047_c0/f2p0/2861<br>isoform=cb6047_c0;full_length_coverage=2;non_full_length_coverage=0;isoform_length=2861;expected_accuracy=0.996         | gnl BL_ORD_ID 44894<br>isoform=cb6047_c1;full_length_coverage=1;non_full_length_coverage=0;isoform_length=3255;expected_accuracy=0.996      | cb6047_c1/f1p0/2949      | 242  | 2861 | 100  | 247  | 325  | 2945 | 1    | 148  |

|                                                                                                                                                  |                                                                                                                                                                      |      |      |      |      |      |     |      |     |   |
|--------------------------------------------------------------------------------------------------------------------------------------------------|----------------------------------------------------------------------------------------------------------------------------------------------------------------------|------|------|------|------|------|-----|------|-----|---|
| ngth_coverage=0;isoform_length=2861;expected_accuracy=0.995                                                                                      | ngth_coverage=0;isoform_length=2949;expected_accuracy=0.996                                                                                                          |      |      |      |      |      |     |      |     |   |
| cb8564_c38710/f1p0/1997                                                                                                                          | gnl BL_ORD_ID 56700 cb8564_c52920/f1p0/1915                                                                                                                          | 244  | 1801 | 42   | 246  | 357  | 191 | 1    | 205 | 3 |
| cb8564_c128290/f1p0/2765<br>isoform=cb8564_c128290;full_length_coverage=1;non_full_length_coverage=0;isoform_length=2765;expected_accuracy=0.996 | gnl BL_ORD_ID 13152 cb8564_c179082/f1p1/2856<br>isoform=cb8564_c179082;full_length_coverage=1;non_full_length_coverage=1;isoform_length=2856;expected_accuracy=0.998 | 1    | 1820 | 1820 | 2679 | 4    | 182 | 1951 | 280 | 2 |
| cb6785_c11/f1p0/2230<br>isoform=cb6785_c11;full_length_coverage=1;non_full_length_coverage=0;isoform_length=2230;expected_accuracy=0.990         | gnl BL_ORD_ID 4712 cb6785_c4/f1p0/2768<br>isoform=cb6785_c4;full_length_coverage=1;non_full_length_coverage=0;isoform_length=2768;expected_accuracy=0.995            | 1    | 1562 | 1561 | 2154 | 84   | 164 | 2176 | 276 | 2 |
| cb7639_c0/f3p0/2226<br>isoform=cb7639_c0;full_length_coverage=3;non_full_length_coverage=0;isoform_length=2226;expected_accuracy=0.997           | gnl BL_ORD_ID 51428 cb7639_c14/f1p0/2787                                                                                                                             | 1    | 1800 | 1799 | 2226 | 37   | 183 | 2114 | 254 | 4 |
| cb8_c22/f1p1/3941<br>isoform=cb8_c22;full_length_coverage=1;non_full_length_coverage=1;isoform_length=3941;expected_accuracy=0.997               | gnl BL_ORD_ID 59029 cb8_c15/f1p0/4140                                                                                                                                | 375  | 3938 | 22   | 376  | 456  | 401 | 1    | 355 | 0 |
| cb1974_c7/f1p1/3734                                                                                                                              | gnl BL_ORD_ID 66571 cb1974_c2/f1p0/4104                                                                                                                              | 1785 | 3677 | 1    | 1786 | 2040 | 393 | 25   | 180 | 1 |
| cb8564_c40598/f1p4/3119                                                                                                                          | gnl BL_ORD_ID 14091 cb8564_c43119/f1p4/3194<br>isoform=cb8564_c43119;full_length_coverage=1;non_full_length_coverage=4;isoform_length=3194;expected_accuracy=0.995   | 1    | 2732 | 2729 | 3013 | 1    | 274 | 2871 | 315 | 9 |

|                                                                                                                                                  |                                                                                                                                                                         |      |      |      |      |      |          |      |          |
|--------------------------------------------------------------------------------------------------------------------------------------------------|-------------------------------------------------------------------------------------------------------------------------------------------------------------------------|------|------|------|------|------|----------|------|----------|
| cb8564_c77994/f1p2/2630<br>isoform=cb8564_c77994;full_length_coverage=1;non_full_length_coverage=2;isoform_length=2630;expected_accuracy=0.998   | gnl BL_ORD_ID 18842      cb8564_c85964/f7p5/2973<br>isoform=cb8564_c85964;full_length_coverage=7;non_full_length_coverage=5;isoform_length=2973;expected_accuracy=0.996 | 1    | 1819 | 1815 | 2630 | 52   | 187<br>3 | 2017 | 283<br>4 |
| cb8564_c107741/f4p0/3601<br>isoform=cb8564_c107741;full_length_coverage=4;non_full_length_coverage=0;isoform_length=3601;expected_accuracy=1.000 | gnl BL_ORD_ID 57760      cb8564_c79901/f1p0/4124                                                                                                                        | 137  | 2748 | 2744 | 3601 | 3    | 261<br>4 | 2807 | 366<br>6 |
| cb1955_c6/f2p0/2436<br>isoform=cb1955_c6;full_length_coverage=2;non_full_length_coverage=0;isoform_length=2436;expected_accuracy=0.993           | gnl BL_ORD_ID 35587      cb1955_c12/f1p1/2862<br>isoform=cb1955_c12;full_length_coverage=1;non_full_length_coverage=1;isoform_length=2862;expected_accuracy=1.000       | 1027 | 2327 | 1    | 1029 | 1569 | 286<br>2 | 92   | 1120     |
| cb8564_c3812/f2p0/2257                                                                                                                           | gnl BL_ORD_ID 14851      cb8564_c3811/f1p0/2840<br>isoform=cb8564_c3811;full_length_coverage=1;non_full_length_coverage=0;isoform_length=2840;expected_accuracy=0.996   | 1    | 1554 | 1553 | 2205 | 7    | 156<br>7 | 2188 | 284<br>0 |
| cb8564_c40598/f1p4/3119                                                                                                                          | gnl BL_ORD_ID 55600      cb8564_c46484/f1p0/3151                                                                                                                        | 104  | 2732 | 2729 | 3067 | 5    | 265<br>3 | 2773 | 3110     |
| cb8564_c66201/f2p1/2384<br>isoform=cb8564_c66201;full_length_coverage=2;non_full_length_coverage=1;isoform_length=2384;expected_accuracy=0.994   | gnl BL_ORD_ID 55080      cb8564_c24180/f1p0/4190                                                                                                                        | 499  | 2384 | 5    | 499  | 2245 | 410<br>3 | 7    | 501      |
| cb8564_c184250/f1p0/2256<br>isoform=cb8564_c184250;full_length_coverage=1;non_full_length_coverage=0;isoform_length=2256;expected_accuracy=0.996 | gnl BL_ORD_ID 56378      cb8564_c75558/f1p0/2635                                                                                                                        | 1    | 1642 | 1638 | 2256 | 3    | 164<br>4 | 1905 | 252<br>3 |

|                                                                                                                                                |                                                                                                                                                                           |      |      |      |      |      |          |      |          |
|------------------------------------------------------------------------------------------------------------------------------------------------|---------------------------------------------------------------------------------------------------------------------------------------------------------------------------|------|------|------|------|------|----------|------|----------|
| cb3584_c15/f1p2/2442<br>isoform=cb3584_c15;full_length_coverage=1;non_full_length_coverage=2;isoform_length=2442;expected_accuracy=0.994       | gnl BL_ORD_ID 40786      cb3584_c10/f1p1/3385<br>isoform=cb3584_c10;full_length_coverage=1;non_full_length_coverage=1;isoform_length=3385;expected_accuracy=0.992         | 14   | 1617 | 1616 | 2442 | 1    | 1611     | 1713 | 253<br>5 |
| cb8564_c37361/f1p0/3076                                                                                                                        | gnl BL_ORD_ID 12913      cb8564_c182049/f1p0/3195<br>isoform=cb8564_c182049;full_length_coverage=1;non_full_length_coverage=0;isoform_length=3195;expected_accuracy=0.997 | 1    | 2481 | 2477 | 3070 | 1    | 249<br>7 | 2599 | 319<br>5 |
| cb6730_c30/f4p0/2653<br>isoform=cb6730_c30;full_length_coverage=4;non_full_length_coverage=0;isoform_length=2653;expected_accuracy=1.000       | gnl BL_ORD_ID 49988      cb6730_c7/f1p0/2780                                                                                                                              | 10   | 1755 | 1754 | 2653 | 1    | 173<br>9 | 1896 | 277<br>6 |
| cb8564_c53418/f1p0/2602<br>isoform=cb8564_c53418;full_length_coverage=1;non_full_length_coverage=0;isoform_length=2602;expected_accuracy=0.991 | gnl BL_ORD_ID 58013      cb8564_c86635/f1p17/2750                                                                                                                         | 1163 | 2598 | 1    | 1168 | 1269 | 270<br>7 | 1    | 1168     |
| cb1279_c85/f1p0/1794<br>isoform=cb1279_c85;full_length_coverage=1;non_full_length_coverage=0;isoform_length=1794;expected_accuracy=0.998       | gnl BL_ORD_ID 26844      cb1279_c82/f1p1/2771<br>isoform=cb1279_c82;full_length_coverage=1;non_full_length_coverage=1;isoform_length=2771;expected_accuracy=0.996         | 1    | 1120 | 1115 | 1794 | 24   | 1141     | 2088 | 277<br>1 |
| cb8564_c39756/f1p1/3004                                                                                                                        | gnl BL_ORD_ID 14407      cb8564_c44036/f1p0/3258<br>isoform=cb8564_c44036;full_length_coverage=1;non_full_length_coverage=0;isoform_length=3258;expected_accuracy=0.992   | 1151 | 2847 | 1    | 1151 | 1575 | 325<br>6 | 1    | 1147     |
| cb8564_c16421/f1p0/2249                                                                                                                        | gnl BL_ORD_ID 54126      cb8564_c18992/f1p0/3876                                                                                                                          | 1    | 1694 | 1692 | 2259 | 113  | 180<br>6 | 2624 | 319<br>1 |

|                                                                                                                                            |                                                                                                                                                            |     |      |      |      |      |          |      |          |
|--------------------------------------------------------------------------------------------------------------------------------------------|------------------------------------------------------------------------------------------------------------------------------------------------------------|-----|------|------|------|------|----------|------|----------|
| cb653_c12/f1p0/3754<br>isoform=cb653_c12;full_length_coverage=1;non_full_length_coverage=0;isoform_length=3754;expected_accuracy=0.995     | gnl BL_ORD_ID 49383 cb653_c20/f1p2/4373                                                                                                                    | 195 | 3754 | 1    | 196  | 736  | 429<br>2 | 147  | 343      |
| cb2735_c14/f1p3/3537<br>isoform=cb2735_c14;full_length_coverage=1;non_full_length_coverage=3;isoform_length=3537;expected_accuracy=0.992   | gnl BL_ORD_ID 38523 cb2735_c8/f1p3/4461<br>isoform=cb2735_c8;full_length_coverage=1;non_full_length_coverage=3;isoform_length=4461;expected_accuracy=0.997 | 1   | 2978 | 2976 | 3537 | 1    | 298<br>0 | 3889 | 446<br>1 |
| cb3216_c5/f1p0/2919<br>isoform=cb3216_c5;full_length_coverage=1;non_full_length_coverage=1;isoform_length=1783;expected_accuracy=0.991     | gnl BL_ORD_ID 39686 cb3216_c3/f1p0/3686<br>isoform=cb3216_c3;full_length_coverage=1;non_full_length_coverage=0;isoform_length=3686;expected_accuracy=0.998 | 1   | 1869 | 1867 | 2683 | 56   | 192<br>2 | 2871 | 368<br>6 |
| cb10162_c5/f1p1/1783<br>isoform=cb10162_c5;full_length_coverage=1;non_full_length_coverage=1;isoform_length=1783;expected_accuracy=0.991   | gnl BL_ORD_ID 48152 cb10162_c4/f1p0/1934                                                                                                                   | 1   | 1292 | 1293 | 1718 | 50   | 133<br>9 | 1506 | 193<br>3 |
| cb10896_c0/f8p0/1202<br>isoform=cb10896_c0;full_length_coverage=8;non_full_length_coverage=0;isoform_length=1202;expected_accuracy=1.000   | gnl BL_ORD_ID 48959 cb10896_c2/f1p0/1971                                                                                                                   | 256 | 1202 | 37   | 256  | 1002 | 194<br>7 | 1    | 223      |
| cb4805_c7/f1p0/2117<br>isoform=cb4805_c7;full_length_coverage=1;non_full_length_coverage=0;isoform_length=2117;expected_accuracy=0.994     | gnl BL_ORD_ID 72016 cb4805_c19/f1p0/2494                                                                                                                   | 1   | 1754 | 1749 | 2077 | 2    | 175<br>5 | 2049 | 237<br>9 |
| cb12529_c35/f1p0/1800<br>isoform=cb12529_c35;full_length_coverage=1;non_full_length_coverage=0;isoform_length=1800;expected_accuracy=0.994 | gnl BL_ORD_ID 52013 cb8564_c1207/f1p0/2117                                                                                                                 | 1   | 1157 | 1157 | 1780 | 22   | 1185     | 1497 | 2119     |

|                                                                |                                                                                                                     |                         |      |      |      |      |      |     |      |     |
|----------------------------------------------------------------|---------------------------------------------------------------------------------------------------------------------|-------------------------|------|------|------|------|------|-----|------|-----|
| _length_coverage=0;isoform_length=1800;expected_accuracy=0.997 |                                                                                                                     |                         |      |      |      |      |      |     |      |     |
| cb8564_c43601/f1p0/2228                                        | gnl BL_ORD_ID 55229                                                                                                 | cb8564_c35853/f1p0/4871 | 1    | 1815 | 1814 | 2076 | 2011 | 382 | 4179 | 444 |
|                                                                |                                                                                                                     |                         |      |      |      |      |      | 6   |      | 4   |
| cb8564_c125377/f1p0/2751                                       | gnl BL_ORD_ID 17343                                                                                                 | cb8564_c84317/f1p0/2567 | 321  | 2477 | 61   | 321  | 412  | 256 | 1    | 261 |
|                                                                | isoform=cb8564_c84317;full_length_coverage=1;non_full_length_coverage=0;isoform_length=2567;expected_accuracy=0.995 |                         |      |      |      |      |      |     |      |     |
| cb8564_c53561/f1p0/2359                                        | gnl BL_ORD_ID 16440                                                                                                 | cb8564_c77380/f2p0/3010 | 495  | 2342 | 6    | 499  | 1155 | 300 | 144  | 637 |
|                                                                | isoform=cb8564_c77380;full_length_coverage=2;non_full_length_coverage=0;isoform_length=3010;expected_accuracy=0.998 |                         |      |      |      |      |      |     |      |     |
| cb6739_c19/f1p1/2409                                           | isoform=cb6739_c19;full_length_coverage=1;non_full_length_coverage=1;isoform_length=2409;expected_accuracy=0.998    |                         |      |      |      |      |      |     |      |     |
|                                                                | gnl BL_ORD_ID 47681                                                                                                 | cb6739_c22/f1p1/2639    | 10   | 2070 | 2067 | 2402 | 11   | 208 | 2204 | 254 |
|                                                                |                                                                                                                     |                         |      |      |      |      |      | 1   |      | 1   |
| cb8564_c20202/f1p0/2556                                        | gnl BL_ORD_ID 54270                                                                                                 | cb8564_c21511/f1p0/2859 | 1    | 2227 | 2224 | 2532 | 81   | 232 | 2493 | 279 |
|                                                                | isoform=cb8564_c20202;full_length_coverage=1;non_full_length_coverage=0;isoform_length=2556;expected_accuracy=0.999 |                         |      |      |      |      |      |     |      |     |
| cb8564_c4058/f1p0/2228                                         | gnl BL_ORD_ID 15435                                                                                                 | cb8564_c4057/f1p0/2872  | 1046 | 2228 | 1    | 1051 | 1681 | 286 | 22   | 106 |
|                                                                | isoform=cb8564_c4058;full_length_coverage=1;non_full_length_coverage=0;isoform_length=2228;expected_accuracy=0.999  |                         |      |      |      |      |      |     |      |     |
|                                                                | isoform=cb8564_c4057;full_length_coverage=1;non_full_length_coverage=0;isoform_length=2872;expected_accuracy=1.000  |                         |      |      |      |      |      |     |      |     |
| cb8564_c75565/f1p1/2477                                        | gnl BL_ORD_ID 15922                                                                                                 | cb8564_c75221/f1p1/2651 | 485  | 2477 | 7    | 485  | 632  | 263 | 51   | 530 |
|                                                                | isoform=cb8564_c75565;full_length_coverage=1;non_full_length_coverage=0;isoform_length=2477;expected_accuracy=0.999 |                         |      |      |      |      |      |     |      |     |
|                                                                | isoform=cb8564_c75221;full_length_coverage=1;non_full_length_coverage=0;isoform_length=2651;expected_accuracy=0.999 |                         |      |      |      |      |      |     |      |     |



|                                                                                                                                                                                                             |                                                                                                                                                                                                                                                     |      |      |      |      |      |     |      |     |
|-------------------------------------------------------------------------------------------------------------------------------------------------------------------------------------------------------------|-----------------------------------------------------------------------------------------------------------------------------------------------------------------------------------------------------------------------------------------------------|------|------|------|------|------|-----|------|-----|
| ull_length_coverage=1;isoform_length=2477;expected_accuracy=0.995<br>cb1665_c5/f1p0/2596<br>isoform=cb1665_c5;full_length_coverage=1;non_full_length_coverage=0;isoform_length=2596;expected_accuracy=0.997 | ll_length_coverage=1;isoform_length=2651;expected_accuracy=0.997<br>gnl BL_ORD_ID 31040                      cb1665_c6/f1p0/2770<br>isoform=cb1665_c6;full_length_coverage=1;non_full_length_coverage=0;isoform_length=2770;expected_accuracy=0.996 | 1    | 2258 | 2258 | 2592 | 55   | 229 | 2435 | 276 |
| cb1573_c17/f1p1/3566                                                                                                                                                                                        | gnl BL_ORD_ID 30371                      cb1573_c7/f1p2/3841<br>isoform=cb1573_c7;full_length_coverage=1;non_full_length_coverage=2;isoform_length=3841;expected_accuracy=1.000                                                                     | 1217 | 3594 | 1    | 1220 | 1445 | 382 | 69   | 128 |
| cb5564_c21/f1p0/1889                                                                                                                                                                                        | gnl BL_ORD_ID 45841                      cb5564_c6/f3p0/2246<br>isoform=cb5564_c6;full_length_coverage=3;non_full_length_coverage=0;isoform_length=2246;expected_accuracy=0.999                                                                     | 355  | 1872 | 5    | 359  | 710  | 223 | 113  | 471 |
| cb5108_c3/f2p0/2026                                                                                                                                                                                         | gnl BL_ORD_ID 43672                      cb5108_c12/f1p0/2615<br>isoform=cb5108_c12;full_length_coverage=1;non_full_length_coverage=0;isoform_length=2615;expected_accuracy=0.997                                                                   | 1    | 1480 | 1479 | 1986 | 1    | 148 | 2109 | 261 |
| cb8564_c47202/f1p0/3195                                                                                                                                                                                     | gnl BL_ORD_ID 55939                      cb8564_c49630/f1p4/3487<br>isoform=cb8564_c49630;full_length_coverage=1;non_full_length_coverage=0;isoform_length=3487;expected_accuracy=0.996                                                             | 2    | 2916 | 2916 | 3188 | 1    | 291 | 3243 | 349 |
| cb2959_c6/f1p0/3470                                                                                                                                                                                         | gnl BL_ORD_ID 38587                      cb2959_c4/f1p0/3532<br>isoform=cb2959_c4;full_length_coverage=1;non_full_length_coverage=0;isoform_length=3532;expected_accuracy=0.994                                                                     | 1008 | 3409 | 1    | 1008 | 1138 | 353 | 1    | 100 |

|                         |                                                                                                                                                                         |     |      |      |      |     |          |      |          |
|-------------------------|-------------------------------------------------------------------------------------------------------------------------------------------------------------------------|-----|------|------|------|-----|----------|------|----------|
| cb2242_c12/f1p0/1844    | gnl BL_ORD_ID 37986      cb2242_c10/f1p1/2221<br>isoform=cb2242_c10;full_length_coverage=1;non_full_length_coverage=1;isoform_length=2221;expected_accuracy=1.000       | 390 | 1778 | 45   | 390  | 751 | 213<br>9 | 1    | 346      |
| cb2133_c24/f1p0/3763    | gnl BL_ORD_ID 68291      cb2133_c31/f1p0/3897<br>isoform=cb2133_c24;full_length_coverage=1;non_full_length_coverage=0;isoform_length=3763;expected_accuracy=0.995       | 1   | 1952 | 1950 | 3763 | 21  | 196<br>6 | 2076 | 388<br>4 |
| cb357_c7/f1p0/1386      | gnl BL_ORD_ID 70825      cb357_c2/f1p0/1897<br>isoform=cb357_c7;full_length_coverage=1;non_full_length_coverage=0;isoform_length=1386;expected_accuracy=1.000           | 266 | 1386 | 53   | 268  | 652 | 177<br>2 | 92   | 307      |
| cb8564_c4966/f1p0/2245  | gnl BL_ORD_ID 53421      cb8564_c124689/f1p0/2316                                                                                                                       | 128 | 1994 | 1    | 128  | 362 | 222<br>8 | 47   | 174      |
| cb2507_c1/f3p1/3829     | gnl BL_ORD_ID 37052      cb2507_c18/f1p0/5572<br>isoform=cb2507_c1;full_length_coverage=3;non_full_length_coverage=1;isoform_length=3829;expected_accuracy=1.000        | 1   | 2536 | 2535 | 3774 | 15  | 253<br>7 | 4325 | 557<br>2 |
| cb5472_c6/f1p0/3267     | gnl BL_ORD_ID 73415      cb5472_c10/f1p0/4117<br>isoform=cb5472_c6;full_length_coverage=1;non_full_length_coverage=0;isoform_length=3267;expected_accuracy=0.991        | 1   | 2812 | 2813 | 3216 | 1   | 283<br>9 | 3684 | 408<br>4 |
| cb8564_c87900/f1p0/2261 | gnl BL_ORD_ID 57978      cb8564_c85833/f1p0/2942<br>isoform=cb8564_c87900;full_length_coverage=1;non_full_length_coverage=0;isoform_length=2261;expected_accuracy=0.995 | 1   | 1624 | 1622 | 2261 | 61  | 170<br>9 | 2309 | 294<br>8 |

|                                                                                                                                                |                                                                                                                                                                                         |      |      |      |      |      |      |      |      |
|------------------------------------------------------------------------------------------------------------------------------------------------|-----------------------------------------------------------------------------------------------------------------------------------------------------------------------------------------|------|------|------|------|------|------|------|------|
| cb3697_c0/f2p0/2080<br>isoform=cb3697_c0;full_length_coverage=2;non_full_length_coverage=0;isoform_length=2080;expected_accuracy=1.000         | gnl BL_ORD_ID 71450 cb3697_c1/f1p0/3564                                                                                                                                                 | 1    | 1084 | 1084 | 2073 | 1    | 1079 | 2504 | 3498 |
| cb507_c4/f1p0/3466                                                                                                                             | gnl BL_ORD_ID 72257 cb507_c0/f1p0/4657                                                                                                                                                  | 1    | 2743 | 2739 | 3390 | 1    | 2753 | 3944 | 4596 |
| cb1119_c6/f1p0/2308<br>isoform=cb1119_c6;full_length_coverage=1;non_full_length_coverage=0;isoform_length=2308;expected_accuracy=0.994         | gnl BL_ORD_ID 1538                      cb1119_c4/f1p1/4438<br>isoform=cb1119_c4;full_length_coverage=1;non_full_length_coverage=1;isoform_length=4438;expected_accuracy=0.999          | 1039 | 2308 | 1    | 1040 | 1468 | 2738 | 22   | 1060 |
| cb8564_c41162/f1p0/3158                                                                                                                        | gnl BL_ORD_ID 14539                      cb8564_c46562/f2p3/3196<br>isoform=cb8564_c46562;full_length_coverage=2;non_full_length_coverage=3;isoform_length=3196;expected_accuracy=0.995 | 12   | 2553 | 2548 | 3036 | 16   | 2577 | 2708 | 3195 |
| cb8564_c16090/f1p6/2546<br>isoform=cb8564_c16090;full_length_coverage=1;non_full_length_coverage=6;isoform_length=2546;expected_accuracy=1.000 | gnl BL_ORD_ID 9350                      cb8564_c11826/f1p0/2916<br>isoform=cb8564_c11826;full_length_coverage=1;non_full_length_coverage=0;isoform_length=2916;expected_accuracy=0.997  | 1    | 1294 | 1293 | 2482 | 4    | 1296 | 1543 | 2731 |
| cb5220_c14/f1p2/2375<br>isoform=cb5220_c14;full_length_coverage=1;non_full_length_coverage=2;isoform_length=2375;expected_accuracy=0.994       | gnl BL_ORD_ID 46711                      cb5220_c9/f1p0/2464<br>isoform=cb5220_c9;full_length_coverage=1;non_full_length_coverage=0;isoform_length=2464;expected_accuracy=0.991         | 188  | 2319 | 1    | 188  | 349  | 2464 | 2    | 190  |
| cb14382_c6/f1p0/1278                                                                                                                           | gnl BL_ORD_ID 49473 cb793_c3/f1p0/3227                                                                                                                                                  | 296  | 1248 | 6    | 297  | 2162 | 3114 | 1    | 292  |
| cb8564_c185920/f1p0/2777<br>isoform=cb8564_c185920;full_length_coverage=1;non_full_length_coverage=0;isoform_length=2777;expected              | gnl BL_ORD_ID 54698 cb8564_c155298/f3p9/3822                                                                                                                                            | 174  | 2775 | 1    | 177  | 351  | 2953 | 15   | 192  |

|                          |                                                                                                                                                                           |     |      |      |      |      |          |      |          |  |
|--------------------------|---------------------------------------------------------------------------------------------------------------------------------------------------------------------------|-----|------|------|------|------|----------|------|----------|--|
| _accuracy=0.996          |                                                                                                                                                                           |     |      |      |      |      |          |      |          |  |
| cb8564_c15230/f1p0/1944  | gnl BL_ORD_ID 11316      cb8564_c12355/f1p9/2685<br>isoform=cb8564_c12355;full_length_coverage=1;non_full_length_coverage=9;isoform_length=2685;expected_accuracy=0.999   | 352 | 1944 | 85   | 357  | 1085 | 267<br>7 | 103  | 375      |  |
| cb8564_c71195/f1p0/3415  | gnl BL_ORD_ID 57409      cb8564_c92262/f1p0/3503                                                                                                                          | 1   | 1755 | 1756 | 3373 | 47   | 180<br>1 | 1681 | 329<br>8 |  |
| cb7564_c36/f1p0/1940     | gnl BL_ORD_ID 51351      cb7564_c35/f1p0/2473<br>isoform=cb7564_c36;full_length_coverage=1;non_full_length_coverage=0;isoform_length=1940;expected_accuracy=0.998         | 231 | 1939 | 5    | 232  | 767  | 247<br>4 | 12   | 240      |  |
| cb7456_c0/f2p0/2350      | gnl BL_ORD_ID 6358      cb7456_c2/f1p0/2610<br>isoform=cb7456_c0;full_length_coverage=2;non_full_length_coverage=0;isoform_length=2350;expected_accuracy=1.000            | 1   | 1613 | 1613 | 2350 | 3    | 161<br>5 | 1841 | 257<br>8 |  |
| cb1259_c13/f1p1/3391     | gnl BL_ORD_ID 23434      cb1259_c4/f1p0/4412<br>isoform=cb1259_c4;full_length_coverage=1;non_full_length_coverage=0;isoform_length=4412;expected_accuracy=0.995           | 19  | 3002 | 3002 | 3258 | 10   | 298<br>5 | 4158 | 441<br>2 |  |
| cb8564_c115486/f1p1/3203 | gnl BL_ORD_ID 10287      cb8564_c118242/f1p2/3724<br>isoform=cb8564_c118242;full_length_coverage=1;non_full_length_coverage=2;isoform_length=3724;expected_accuracy=0.990 | 98  | 3222 | 1    | 102  | 600  | 372<br>4 | 177  | 279      |  |
| cb6063_c13/f1p1/2429     | gnl BL_ORD_ID 45456      cb6063_c27/f3p0/2968<br>isoform=cb6063_c27;full_length_coverage=3;non_full_length_coverage=0;isoform_length=2968;expected_accuracy=0.996         | 119 | 2430 | 1    | 120  | 656  | 296<br>5 | 118  | 237      |  |

|                                                                                                                                                  |                                                                                                                                                                  |     |      |      |      |     |      |      |      |  |
|--------------------------------------------------------------------------------------------------------------------------------------------------|------------------------------------------------------------------------------------------------------------------------------------------------------------------|-----|------|------|------|-----|------|------|------|--|
|                                                                                                                                                  | acy=1.000                                                                                                                                                        |     |      |      |      |     |      |      |      |  |
| cb5931_c13/f1p0/2426<br>isoform=cb5931_c13;full_length_coverage=1;non_full_length_coverage=0;isoform_length=2426;expected_accuracy=0.996         | gnl BL_ORD_ID 74667 cb5931_c3/f1p0/2877                                                                                                                          | 183 | 2371 | 1    | 185  | 502 | 2690 | 16   | 198  |  |
| cb13355_c8/f1p0/1342<br>isoform=cb13355_c8;full_length_coverage=1;non_full_length_coverage=0;isoform_length=1342;expected_accuracy=0.998         | gnl BL_ORD_ID 26684 cb13355_c19/f36p0/1483<br>isoform=cb13355_c19;full_length_coverage=36;non_full_length_coverage=0;isoform_length=1483;expected_accuracy=1.000 | 1   | 1017 | 1016 | 1335 | 39  | 1051 | 1164 | 1483 |  |
| cb8564_c181853/f1p0/2119<br>isoform=cb8564_c181853;full_length_coverage=1;non_full_length_coverage=0;isoform_length=2119;expected_accuracy=0.997 | gnl BL_ORD_ID 55291 cb8564_c37409/f1p0/3153                                                                                                                      | 1   | 1339 | 1334 | 2115 | 1   | 1335 | 2163 | 2948 |  |
| cb8564_c49562/f1p0/2838<br>isoform=cb8564_c49562;full_length_coverage=1;non_full_length_coverage=0;isoform_length=2838;expected_accuracy=0.995   | gnl BL_ORD_ID 57176 cb8564_c85665/f1p0/3087                                                                                                                      | 18  | 2331 | 2327 | 2837 | 2   | 2342 | 2449 | 2965 |  |
| cb1279_c77/f1p0/3526<br>isoform=cb1279_c77;full_length_coverage=1;non_full_length_coverage=0;isoform_length=3526;expected_accuracy=0.994         | gnl BL_ORD_ID 61178 cb1279_c17/f1p0/4392                                                                                                                         | 1   | 2976 | 2974 | 3398 | 1   | 2986 | 3860 | 4285 |  |
| cb1279_c29/f1p0/3632<br>isoform=cb1279_c29;full_length_coverage=1;non_full_length_coverage=0;isoform_length=3632;expected_accuracy=0.994         | gnl BL_ORD_ID 61178 cb1279_c17/f1p0/4392                                                                                                                         | 1   | 3104 | 3101 | 3526 | 1   | 3104 | 3860 | 4285 |  |
| cb6360_c3/f2p0/2156<br>isoform=cb6360_c3;full_length_coverage=2;non_full_length_coverage=0;isoform_length=2156;expected_accuracy=0.994           | gnl BL_ORD_ID 47452 cb6360_c5/f1p1/2881                                                                                                                          | 1   | 1546 | 1542 | 2156 | 1   | 1536 | 2202 | 2812 |  |

|                                                                                                                     |                                                                                                                  |                         |      |      |      |      |      |      |      |      |  |  |  |
|---------------------------------------------------------------------------------------------------------------------|------------------------------------------------------------------------------------------------------------------|-------------------------|------|------|------|------|------|------|------|------|--|--|--|
| acy=0.996                                                                                                           |                                                                                                                  |                         |      |      |      |      |      |      |      |      |  |  |  |
| cb4016_c2/f3p1/2863                                                                                                 | gnl BL_ORD_ID 39535                                                                                              | cb4016_c27/f1p1/3204    |      |      |      |      |      |      |      |      |  |  |  |
| isoform=cb4016_c2;full_length_coverage=3;non_full_length_coverage=1;isoform_length=2863;expected_accuracy=0.998     | isoform=cb4016_c27;full_length_coverage=1;non_full_length_coverage=1;isoform_length=3204;expected_accuracy=0.996 |                         | 489  | 2863 | 8    | 493  | 788  | 3163 | 3    | 485  |  |  |  |
| cb938_c6/f2p5/3513                                                                                                  | gnl BL_ORD_ID 21149                                                                                              | cb938_c5/f2p0/4567      |      |      |      |      |      |      |      |      |  |  |  |
| isoform=cb938_c6;full_length_coverage=2;non_full_length_coverage=5;isoform_length=3513;expected_accuracy=1.000      | isoform=cb938_c5;full_length_coverage=2;non_full_length_coverage=0;isoform_length=4567;expected_accuracy=0.998   |                         | 1153 | 3466 | 1    | 1156 | 2255 | 4567 | 1    | 1155 |  |  |  |
| cb7842_c1/f2p0/2139                                                                                                 | gnl BL_ORD_ID 6874                                                                                               | cb7842_c3/f1p0/2515     |      |      |      |      |      |      |      |      |  |  |  |
| isoform=cb7842_c1;full_length_coverage=2;non_full_length_coverage=0;isoform_length=2139;expected_accuracy=1.000     | isoform=cb7842_c3;full_length_coverage=1;non_full_length_coverage=0;isoform_length=2515;expected_accuracy=0.996  |                         | 1    | 1215 | 1213 | 2056 | 57   | 1272 | 1672 | 2515 |  |  |  |
| cb416_c58/f1p0/2505                                                                                                 | gnl BL_ORD_ID 44315                                                                                              | cb416_c53/f1p0/2998     |      |      |      |      |      |      |      |      |  |  |  |
| isoform=cb416_c58;full_length_coverage=1;non_full_length_coverage=0;isoform_length=2505;expected_accuracy=0.992     | isoform=cb416_c53;full_length_coverage=1;non_full_length_coverage=0;isoform_length=2998;expected_accuracy=0.999  |                         | 286  | 2505 | 4    | 287  | 680  | 2880 | 247  | 529  |  |  |  |
| cb8564_c36689/f1p1/2368                                                                                             |                                                                                                                  |                         |      |      |      |      |      |      |      |      |  |  |  |
| isoform=cb8564_c36689;full_length_coverage=1;non_full_length_coverage=1;isoform_length=2368;expected_accuracy=0.991 | gnl BL_ORD_ID 55414                                                                                              | cb8564_c41002/f1p3/2869 | 1    | 1709 | 1706 | 2368 | 6    | 1708 | 2146 | 2809 |  |  |  |
| cb1380_c36/f1p0/2344                                                                                                | gnl BL_ORD_ID 25511                                                                                              | cb1380_c6/f4p1/2530     |      |      |      |      |      |      |      |      |  |  |  |
| isoform=cb1380_c36;full_length_coverage=1;non_full_length_coverage=0;isoform_length=2344;expected_accuracy=0.998    | isoform=cb1380_c6;full_length_coverage=4;non_full_length_coverage=1;isoform_length=2530;expected_accuracy=1.000  |                         | 259  | 2344 | 38   | 262  | 436  | 2530 | 1    | 223  |  |  |  |
| cb416_c19/f1p0/2939                                                                                                 | gnl BL_ORD_ID 72151                                                                                              | cb416_c41/f1p0/3183     |      |      |      |      |      |      |      |      |  |  |  |
|                                                                                                                     |                                                                                                                  |                         | 105  | 2855 | 10   | 109  | 304  | 305  | 104  | 203  |  |  |  |

|                                                                                                                     |                                                                                                                     |                         |     |      |      |      |      |     |      |     |
|---------------------------------------------------------------------------------------------------------------------|---------------------------------------------------------------------------------------------------------------------|-------------------------|-----|------|------|------|------|-----|------|-----|
| cb8564_c42814/f1p0/2151                                                                                             | gnl BL_ORD_ID 15104                                                                                                 | cb8564_c37866/f1p3/2874 |     |      |      |      |      | 4   |      |     |
| isoform=cb8564_c42814;full_length_coverage=1;non_full_length_coverage=0;isoform_length=2151;expected_accuracy=0.993 | isoform=cb8564_c37866;full_length_coverage=1;non_full_length_coverage=3;isoform_length=2874;expected_accuracy=0.990 |                         | 650 | 2151 | 7    | 652  | 1345 | 286 | 1    | 648 |
| cb293_c8/f1p0/4316                                                                                                  | gnl BL_ORD_ID 69536                                                                                                 | cb293_c7/f1p0/4528      | 1   | 2223 | 2220 | 4295 | 10   | 223 | 2409 | 445 |
|                                                                                                                     | gnl BL_ORD_ID 38174                                                                                                 | cb2208_c2/f4p0/3275     |     |      |      |      |      | 2   |      | 6   |
| cb2208_c27/f1p0/2987                                                                                                | isoform=cb2208_c2;full_length_coverage=4;non_full_length_coverage=0;isoform_length=3275;expected_accuracy=0.999     |                         | 2   | 2173 | 2171 | 2961 | 75   | 225 | 2485 | 327 |
|                                                                                                                     | gnl BL_ORD_ID 38523                                                                                                 | cb2735_c8/f1p3/4461     |     |      |      |      |      | 1   |      | 4   |
| cb2735_c15/f1p0/2847                                                                                                | isoform=cb2735_c8;full_length_coverage=1;non_full_length_coverage=3;isoform_length=4461;expected_accuracy=0.997     |                         | 1   | 2286 | 2284 | 2847 | 690  | 298 | 3889 | 445 |
| isoform=cb2735_c15;full_length_coverage=1;non_full_length_coverage=0;isoform_length=2847;expected_accuracy=0.995    |                                                                                                                     |                         |     |      |      |      |      | 0   |      | 9   |
| cb8564_c72190/f1p0/2570                                                                                             | gnl BL_ORD_ID 56976                                                                                                 | cb8564_c79194/f1p0/3436 | 16  | 1899 | 1898 | 2524 | 59   | 193 | 2125 | 275 |
|                                                                                                                     | gnl BL_ORD_ID 33210                                                                                                 | cb1821_c9/f1p0/3939     |     |      |      |      |      | 8   |      | 5   |
| cb1821_c16/f1p1/3514                                                                                                | isoform=cb1821_c9;full_length_coverage=1;non_full_length_coverage=0;isoform_length=3939;expected_accuracy=0.997     |                         | 655 | 3312 | 76   | 655  | 1283 | 393 | 1    | 579 |
|                                                                                                                     | gnl BL_ORD_ID 71434                                                                                                 | cb3671_c14/f1p0/3470    |     |      |      |      |      | 9   |      |     |
| cb3671_c15/f1p1/3196                                                                                                | isoform=cb3671_c14;full_length_coverage=1;non_full_length_coverage=1;isoform_length=3196;expected_accuracy=0.996    |                         | 1   | 2731 | 2731 | 3083 | 209  | 294 | 3116 | 346 |
| isoform=cb3671_c15;full_length_coverage=1;non_full_length_coverage=1;isoform_length=3196;expected_accuracy=0.996    |                                                                                                                     |                         |     |      |      |      |      | 0   |      | 9   |
| cb7296_c2/f2p1/2070                                                                                                 | gnl BL_ORD_ID 6916                                                                                                  | cb7296_c3/f1p1/2653     | 1   | 1752 | 1751 | 2057 | 12   | 176 | 2347 | 265 |

|                                                                                                                                            |                                                                                                                 |     |      |      |      |      |      |      |  |      |
|--------------------------------------------------------------------------------------------------------------------------------------------|-----------------------------------------------------------------------------------------------------------------|-----|------|------|------|------|------|------|--|------|
| isoform=cb7296_c2;full_length_coverage=2;non_full_length_coverage=1;isoform_length=2070;expected_accuracy=1.000<br>cb18456_c4812/f1p2/1223 | isoform=cb7296_c3;full_length_coverage=1;non_full_length_coverage=1;isoform_length=2653;expected_accuracy=0.998 |     |      |      |      |      |      | 2    |  | 3    |
| isoform=cb18456_c4812;full_length_coverage=1;non_full_length_coverage=2;isoform_length=1223;expected_accuracy=0.996                        | gnl BL_ORD_ID 67493 cb18456_c4264/f1p1/1767                                                                     | 256 | 1223 | 7    | 256  | 805  | 1765 | 4    |  | 245  |
| cb8564_c122963/f1p0/3278                                                                                                                   | gnl BL_ORD_ID 52933 cb8564_c112272/f1p0/3791                                                                    | 142 | 2569 | 2565 | 3259 | 1    | 2428 | 2624 |  | 3318 |
| cb3470_c2/f1p0/2829                                                                                                                        | gnl BL_ORD_ID 71231 cb3470_c3/f1p0/3191                                                                         | 1   | 2208 | 2205 | 2823 | 218  | 2426 | 2531 |  | 3148 |
| cb4123_c103/f1p0/1158                                                                                                                      | gnl BL_ORD_ID 70776 cb4123_c24/f1p0/1575                                                                        | 292 | 1146 | 3    | 297  | 498  | 1352 | 30   |  | 324  |
| cb8564_c72116/f1p1/3397                                                                                                                    | gnl BL_ORD_ID 66137 cb18054_c3/f1p0/5284                                                                        | 1   | 2317 | 2315 | 3294 | 1125 | 3441 | 4305 |  | 5284 |
| cb8564_c15573/f1p0/3752                                                                                                                    | gnl BL_ORD_ID 53955 cb8564_c15989/f1p0/4352                                                                     | 26  | 2900 | 2896 | 3752 | 2    | 2877 | 2992 |  | 3849 |
| cb5199_c3/f8p5/2525                                                                                                                        | gnl BL_ORD_ID 73620 cb5199_c19/f1p2/3067                                                                        | 1   | 1899 | 1900 | 2525 | 1    | 1902 | 2461 |  | 3086 |
| isoform=cb5199_c3;full_length_coverage=8;non_full_length_coverage=5;isoform_length=2525;expected_accuracy=0.995<br>cb6605_c12/f1p0/1976    | gnl BL_ORD_ID 4293                      cb6605_c11/f1p1/2320                                                    | 1   | 1295 | 1291 | 1976 | 1    | 129  | 1452 |  | 213  |





|                                                                                                                                                        |                                                                                                                                                                    |     |      |      |      |      |          |      |          |
|--------------------------------------------------------------------------------------------------------------------------------------------------------|--------------------------------------------------------------------------------------------------------------------------------------------------------------------|-----|------|------|------|------|----------|------|----------|
| racy=0.993<br>cb17002_c1/f1p0/1846<br>isoform=cb17002_c1;full_length_coverage=1;non_full_length_coverage=0;isoform_length=1846;expected_accuracy=0.998 | gnl BL_ORD_ID 74699 cb5951_c1/f1p0/2950                                                                                                                            | 160 | 1846 | 1    | 161  | 1248 | 293<br>2 | 3    | 164      |
| cb6217_c5/f2p1/2238<br>isoform=cb6217_c5;full_length_coverage=2;non_full_length_coverage=1;isoform_length=2238;expected_accuracy=0.999                 | gnl BL_ORD_ID 3520 cb6217_c16/f1p0/2367<br>isoform=cb6217_c16;full_length_coverage=1;non_full_length_coverage=0;isoform_length=2367;expected_accuracy=0.991        | 150 | 2189 | 1    | 151  | 281  | 232<br>5 | 1    | 151      |
| cb357_c5/f1p0/1448<br>isoform=cb357_c5;full_length_coverage=1;non_full_length_coverage=0;isoform_length=1448;expected_accuracy=1.000                   | gnl BL_ORD_ID 70825 cb357_c2/f1p0/1897                                                                                                                             | 262 | 1448 | 43   | 264  | 652  | 183<br>9 | 84   | 307      |
| cb8564_c48473/f1p2/2701<br>isoform=cb8564_c48473;full_length_coverage=1;non_full_length_coverage=2;isoform_length=2701;expected_accuracy=0.999         | gnl BL_ORD_ID 18906 cb8564_c90449/f1p3/3223<br>isoform=cb8564_c90449;full_length_coverage=1;non_full_length_coverage=3;isoform_length=3223;expected_accuracy=0.996 | 220 | 2700 | 1    | 225  | 744  | 322<br>3 | 31   | 255      |
| cb3087_c5/f3p1/2943<br>isoform=cb3087_c5;full_length_coverage=3;non_full_length_coverage=1;isoform_length=2943;expected_accuracy=1.000                 | gnl BL_ORD_ID 37309 cb3087_c41/f8p0/3089<br>isoform=cb3087_c41;full_length_coverage=8;non_full_length_coverage=0;isoform_length=3089;expected_accuracy=1.000       | 1   | 2327 | 2323 | 2908 | 28   | 236<br>4 | 2503 | 308<br>9 |
| cb1824_c1/f1p0/3448<br>isoform=cb1824_c1;full_length_coverage=1;non_full_length_coverage=0;isoform_length=3448;expected_accuracy=0.996                 | gnl BL_ORD_ID 64001 cb1824_c4/f1p0/3840                                                                                                                            | 13  | 3224 | 3229 | 3448 | 5    | 320<br>2 | 3405 | 362<br>4 |
| cb8564_c39189/f1p1/2975                                                                                                                                | gnl BL_ORD_ID 17429 cb8564_c85447/f1p0/3196                                                                                                                        | 1   | 2436 | 2435 | 2975 | 3    | 241      | 2660 | 319      |

|                                                                                                                      |                                                                                                                     |   |      |      |      |     |      |      |      |
|----------------------------------------------------------------------------------------------------------------------|---------------------------------------------------------------------------------------------------------------------|---|------|------|------|-----|------|------|------|
| isoform=cb8564_c39189;full_length_coverage=1;non_full_length_coverage=1;isoform_length=2975;expected_accuracy=0.992  | isoform=cb8564_c85447;full_length_coverage=1;non_full_length_coverage=0;isoform_length=3196;expected_accuracy=0.997 |   |      |      |      |     |      | 3    | 5    |
| cb5058_c4/f1p0/2291                                                                                                  | gnl BL_ORD_ID 44019                      cb5058_c0/f1p0/3186                                                        |   |      |      |      |     |      |      |      |
| isoform=cb5058_c4;full_length_coverage=1;non_full_length_coverage=0;isoform_length=2291;expected_accuracy=0.997      | isoform=cb5058_c0;full_length_coverage=1;non_full_length_coverage=0;isoform_length=3186;expected_accuracy=0.997     | 1 | 2061 | 2056 | 2185 | 894 | 2953 | 3057 | 3186 |
| cb8205_c5/f2p0/2450                                                                                                  | gnl BL_ORD_ID 51822   cb8205_c7/f1p0/2934                                                                           |   |      |      |      |     |      |      |      |
| isoform=cb8205_c5;full_length_coverage=2;non_full_length_coverage=0;isoform_length=2450;expected_accuracy=0.999      | isoform=cb8205_c7;full_length_coverage=2;non_full_length_coverage=0;isoform_length=2934;expected_accuracy=0.999     | 1 | 1820 | 1820 | 2445 | 43  | 1879 | 2279 | 2908 |
| cb7736_c7/f1p0/3106                                                                                                  | gnl BL_ORD_ID 6316                      cb7736_c4/f1p0/3571                                                         |   |      |      |      |     |      |      |      |
| isoform=cb7736_c7;full_length_coverage=1;non_full_length_coverage=0;isoform_length=3106;expected_accuracy=0.996      | isoform=cb7736_c4;full_length_coverage=1;non_full_length_coverage=0;isoform_length=3571;expected_accuracy=0.996     | 1 | 1592 | 1587 | 2841 | 20  | 1615 | 2305 | 3565 |
| cb7965_c0/f10p0/2364                                                                                                 | gnl BL_ORD_ID 51667   cb7965_c3/f1p0/3001                                                                           |   |      |      |      |     |      |      |      |
| isoform=cb7965_c0;full_length_coverage=10;non_full_length_coverage=0;isoform_length=2364;expected_accuracy=1.000     | isoform=cb7965_c3;full_length_coverage=10;non_full_length_coverage=0;isoform_length=3001;expected_accuracy=1.000    | 1 | 1783 | 1783 | 2360 | 95  | 1878 | 2197 | 2774 |
| cb8564_c177939/f1p0/1977                                                                                             | gnl BL_ORD_ID 53846   cb8564_c2435/f1p1/2639                                                                        |   |      |      |      |     |      |      |      |
| isoform=cb8564_c177939;full_length_coverage=1;non_full_length_coverage=0;isoform_length=1977;expected_accuracy=1.000 | isoform=cb8564_c2435;full_length_coverage=1;non_full_length_coverage=0;isoform_length=2639;expected_accuracy=1.000  | 1 | 1724 | 1723 | 1977 | 26  | 1747 | 2265 | 2519 |
| cb12685_c3/f1p2/1466                                                                                                 | gnl BL_ORD_ID 54220   cb8564_c20798/f1p1/2960                                                                       |   |      |      |      |     |      |      |      |
| isoform=cb12685_c3;full_length_coverage=1;non_full_length_coverage=0;isoform_length=1466;expected_accuracy=1.000     | isoform=cb8564_c20798;full_length_coverage=1;non_full_length_coverage=0;isoform_length=2960;expected_accuracy=1.000 | 1 | 1295 | 1292 | 1463 | 1   | 1295 | 2752 | 2923 |
| cb5900_c24/f1p0/2855                                                                                                 | gnl BL_ORD_ID 45290                      cb5900_c36/f1p1/3423                                                       |   |      |      |      |     |      |      |      |
| isoform=cb5900_c24;full_length_coverage=1;non_full_length_coverage=0;isoform_length=2855;expected_accuracy=1.000     | isoform=cb5900_c36;full_length_coverage=1;non_full_length_coverage=0;isoform_length=3423;expected_accuracy=1.000    | 1 | 2184 | 2183 | 2855 | 7   | 219  | 2606 | 327  |

|                                                                                                                                                                |                                                                                                                                                                                 |     |      |      |      |     |  |     |      |     |
|----------------------------------------------------------------------------------------------------------------------------------------------------------------|---------------------------------------------------------------------------------------------------------------------------------------------------------------------------------|-----|------|------|------|-----|--|-----|------|-----|
| isoform=cb5900_c24;full_length_coverage=1;non_full_length_coverage=0;isoform_length=2855;expected_accuracy=0.996<br>cb6473_c12/f1p0/1867                       | isoform=cb5900_c36;full_length_coverage=1;non_full_length_coverage=1;isoform_length=3423;expected_accuracy=0.996                                                                |     |      |      |      |     |  | 0   |      | 8   |
| isoform=cb6473_c12;full_length_coverage=1;non_full_length_coverage=0;isoform_length=1867;expected_accuracy=0.991<br>cb8564_c43779/f1p0/3021                    | gnl BL_ORD_ID 47525 cb6473_c6/f1p0/2233                                                                                                                                         | 1   | 1131 | 1126 | 1867 | 95  |  | 122 | 1347 | 208 |
| isoform=cb8564_c43779;full_length_coverage=1;non_full_length_coverage=0;isoform_length=3021;expected_accuracy=0.993<br>cb8564_c15376/f1p0/4060                 | gnl BL_ORD_ID 56275 cb8564_c73216/f1p0/3006                                                                                                                                     | 21  | 2344 | 2345 | 3021 | 28  |  | 232 | 2481 | 315 |
| isoform=cb8564_c15376;full_length_coverage=1;non_full_length_coverage=0;isoform_length=4060                                                                    | gnl BL_ORD_ID 54224 cb8564_c20826/f1p0/4119                                                                                                                                     | 147 | 2717 | 2717 | 3673 | 383 |  | 295 | 3057 | 401 |
| cb2529_c5/f1p0/3561<br>isoform=cb2529_c5;full_length_coverage=1;non_full_length_coverage=0;isoform_length=3561;expected_accuracy=0.997<br>cb10696_c5/f1p0/1470 | gnl BL_ORD_ID 36768                      cb2529_c0/f2p0/3703<br>isoform=cb2529_c0;full_length_coverage=2;non_full_length_coverage=0;isoform_length=3703;expected_accuracy=0.996 | 1   | 2868 | 2868 | 3561 | 1   |  | 286 | 2992 | 368 |
| isoform=cb10696_c5;full_length_coverage=1;non_full_length_coverage=0;isoform_length=1470;expected_accuracy=0.990<br>cb8564_c46939/f1p1/2926                    | gnl BL_ORD_ID 61792 cb12662_c11/f1p0/1530                                                                                                                                       | 134 | 1431 | 1    | 138  | 234 |  | 153 | 1    | 129 |
| isoform=cb8564_c46939;full_length_coverage=1;non_full_length_coverage=0;isoform_length=2926                                                                    | gnl BL_ORD_ID 54425 cb8564_c42906/f1p2/3181                                                                                                                                     | 1   | 2134 | 2130 | 2870 | 1   |  | 212 | 2227 | 296 |
| cb822_c9/f1p3/4612<br>isoform=cb822_c9;full_length_coverage=1;non_full_length_coverage=3;isoform_length=4612;expected_accuracy=0.996                           | gnl BL_ORD_ID 6209                      cb822_c32/f1p1/5821<br>isoform=cb822_c32;full_length_coverage=1;non_full_length_coverage=1;isoform_length=5821;expected_accuracy=0.996  | 1   | 2798 | 2798 | 4557 | 4   |  | 280 | 4060 | 582 |

|                          |                                                                                                                                                                                         |     |      |      |      |     |      |      |      |  |  |  |
|--------------------------|-----------------------------------------------------------------------------------------------------------------------------------------------------------------------------------------|-----|------|------|------|-----|------|------|------|--|--|--|
| y=0.998                  | cy=0.999                                                                                                                                                                                |     |      |      |      |     |      |      |      |  |  |  |
| cb3895_c21/f1p0/3228     | gnl BL_ORD_ID 41273                      cb3895_c5/f3p0/3228<br>isoform=cb3895_c5;full_length_coverage=3;non_full_length_coverage=0;isoform_length=3228;expected_accuracy=0.998         | 1   | 2861 | 2857 | 3027 | 75  | 2935 | 3058 | 3228 |  |  |  |
| cb8564_c138545/f4p0/2007 | gnl BL_ORD_ID 53270   cb8564_c120391/f1p0/2526<br>isoform=cb8564_c138545;full_length_coverage=4;non_full_length_coverage=0;isoform_length=2007;expected_accuracy=1.000                  | 1   | 1016 | 1012 | 1927 | 1   | 1020 | 1504 | 2419 |  |  |  |
| cb1291_c9/f1p1/2168      | gnl BL_ORD_ID 26063                      cb1291_c2/f6p1/2729<br>isoform=cb1291_c9;full_length_coverage=1;non_full_length_coverage=1;isoform_length=2168;expected_accuracy=0.993         | 183 | 2168 | 1    | 182  | 630 | 2616 | 87   | 269  |  |  |  |
| cb396_c48/f1p0/2172      | gnl BL_ORD_ID 70865   cb396_c49/f1p0/3077                                                                                                                                               | 238 | 2104 | 5    | 238  | 553 | 2419 | 72   | 304  |  |  |  |
| cb3875_c6/f1p0/2825      | gnl BL_ORD_ID 40472                      cb3875_c0/f5p0/2930<br>isoform=cb3875_c6;full_length_coverage=1;non_full_length_coverage=0;isoform_length=2825;expected_accuracy=0.991         | 1   | 2616 | 2611 | 2813 | 1   | 2628 | 2728 | 2930 |  |  |  |
| cb8564_c89331/f1p0/2344  | gnl BL_ORD_ID 56303   cb8564_c73808/f1p0/3527                                                                                                                                           | 1   | 2105 | 2101 | 2382 | 90  | 2193 | 3007 | 3290 |  |  |  |
| cb8564_c91771/f1p0/2716  | gnl BL_ORD_ID 15663                      cb8564_c71422/f3p2/3204<br>isoform=cb8564_c91771;full_length_coverage=1;non_full_length_coverage=0;isoform_length=2716;expected_accuracy=0.991 | 328 | 2716 | 48   | 329  | 504 | 2893 | 1    | 281  |  |  |  |
| cb8564_c4679/f1p1/2608   | gnl BL_ORD_ID 55047   cb8564_c4680/f1p0/2928                                                                                                                                            | 251 | 2577 | 1    | 250  | 476 | 280  | 1    | 250  |  |  |  |

|                                                                                                                                                  |                                                                                                                                                                         |      |      |      |      |      |          |      |          |
|--------------------------------------------------------------------------------------------------------------------------------------------------|-------------------------------------------------------------------------------------------------------------------------------------------------------------------------|------|------|------|------|------|----------|------|----------|
| cb8564_c146882/f3p8/4113<br>isoform=cb8564_c146882;full_length_coverage=3;non_full_length_coverage=8;isoform_length=4113;expected_accuracy=0.998 | gnl BL_ORD_ID 14953      cb8564_c34238/f4p1/4317<br>isoform=cb8564_c34238;full_length_coverage=4;non_full_length_coverage=1;isoform_length=4317;expected_accuracy=1.000 | 181  | 4111 | 1    | 185  | 282  | 421<br>3 | 2    | 178      |
| cb4767_c5/f2p0/1630<br>isoform=cb4767_c5;full_length_coverage=2;non_full_length_coverage=0;isoform_length=1630;expected_accuracy=1.000           | gnl BL_ORD_ID 71993      cb4767_c2/f1p0/2894                                                                                                                            | 378  | 1624 | 7    | 381  | 1491 | 273<br>7 | 2    | 376      |
| cb653_c12/f1p0/3754<br>isoform=cb653_c12;full_length_coverage=1;non_full_length_coverage=0;isoform_length=3754;expected_accuracy=0.995           | gnl BL_ORD_ID 5915      cb653_c13/f1p2/4267<br>isoform=cb653_c13;full_length_coverage=1;non_full_length_coverage=2;isoform_length=4267;expected_accuracy=0.999          | 195  | 3754 | 1    | 196  | 596  | 415<br>2 | 101  | 297      |
| cb426_c5/f1p0/2309<br>isoform=cb426_c5;full_length_coverage=1;non_full_length_coverage=0;isoform_length=2309;expected_accuracy=0.998             | gnl BL_ORD_ID 42759      cb426_c0/f1p0/4818<br>isoform=cb426_c0;full_length_coverage=1;non_full_length_coverage=0;isoform_length=4818;expected_accuracy=0.996           | 1053 | 2307 | 1    | 1056 | 3567 | 481<br>8 | 36   | 109<br>6 |
| cb3599_c8/f1p1/2994<br>isoform=cb3599_c8;full_length_coverage=1;non_full_length_coverage=1;isoform_length=2994;expected_accuracy=0.992           | gnl BL_ORD_ID 71369      cb3599_c12/f1p0/3100                                                                                                                           | 1    | 1992 | 1993 | 2952 | 5    | 199<br>4 | 2115 | 307<br>1 |
| cb6633_c1/f5p1/1966<br>isoform=cb6633_c1;full_length_coverage=5;non_full_length_coverage=1;isoform_length=1966;expected_accuracy=1.000           | gnl BL_ORD_ID 3747      cb6633_c9/f1p0/2805<br>isoform=cb6633_c9;full_length_coverage=1;non_full_length_coverage=0;isoform_length=2805;expected_accuracy=0.997          | 1    | 1519 | 1516 | 1966 | 1    | 151<br>8 | 2261 | 271<br>3 |
| cb3485_c9/f1p0/2043                                                                                                                              | gnl BL_ORD_ID 71246      cb3485_c10/f1p0/2515                                                                                                                           | 365  | 2043 | 76   | 365  | 815  | 249      | 1    | 290      |

|                                                                                                                                                |                     |                                                                                                                                                  |     |      |      |      |      |     |      |     |   |   |
|------------------------------------------------------------------------------------------------------------------------------------------------|---------------------|--------------------------------------------------------------------------------------------------------------------------------------------------|-----|------|------|------|------|-----|------|-----|---|---|
| isoform=cb3485_c9;full_length_coverage=1;non_full_length_coverage=0;isoform_length=2043;expected_accuracy=0.993                                |                     |                                                                                                                                                  |     |      |      |      |      |     |      | 4   |   |   |
| cb8564_c39624/f1p1/3482<br>isoform=cb8564_c39624;full_length_coverage=1;non_full_length_coverage=1;isoform_length=3482;expected_accuracy=0.996 | gnl BL_ORD_ID 16467 | cb8564_c49872/f2p1/3689<br>isoform=cb8564_c49872;full_length_coverage=2;non_full_length_coverage=1;isoform_length=3689;expected_accuracy=1.000   | 1   | 2003 | 2003 | 3482 | 15   | 203 | 2209 | 368 | 1 | 9 |
| cb8564_c43779/f1p0/3021<br>isoform=cb8564_c43779;full_length_coverage=1;non_full_length_coverage=0;isoform_length=3021;expected_accuracy=0.993 | gnl BL_ORD_ID 55182 | cb8564_c34825/f1p2/3200<br>isoform=cb8564_c34825;full_length_coverage=1;non_full_length_coverage=0;isoform_length=3200;expected_accuracy=0.993   | 10  | 2344 | 2345 | 3021 | 6    | 236 | 2524 | 319 | 8 | 6 |
| cb6580_c2/f1p0/1593<br>isoform=cb6580_c2;full_length_coverage=1;non_full_length_coverage=0;isoform_length=1593;expected_accuracy=0.996         | gnl BL_ORD_ID 4017  | cb6580_c1/f1p0/2538<br>isoform=cb6580_c1;full_length_coverage=1;non_full_length_coverage=0;isoform_length=2538;expected_accuracy=0.996           | 351 | 1603 | 53   | 353  | 1250 | 250 | 26   | 326 | 2 |   |
| cb1822_c15/f1p0/1826<br>isoform=cb1822_c15;full_length_coverage=1;non_full_length_coverage=0;isoform_length=1826;expected_accuracy=0.998       | gnl BL_ORD_ID 36294 | cb18848_c0/f1p0/5897<br>isoform=cb18848_c0;full_length_coverage=1;non_full_length_coverage=0;isoform_length=5897;expected_accuracy=0.996         | 1   | 1676 | 1671 | 1826 | 753  | 243 | 5164 | 531 | 3 | 6 |
| cb16550_c1/f1p2/1845<br>isoform=cb16550_c1;full_length_coverage=1;non_full_length_coverage=2;isoform_length=1845;expected_accuracy=0.999       | gnl BL_ORD_ID 12468 | cb8564_c129985/f1p2/2126<br>isoform=cb8564_c129985;full_length_coverage=1;non_full_length_coverage=2;isoform_length=2126;expected_accuracy=0.996 | 1   | 1212 | 1207 | 1845 | 13   | 122 | 1443 | 207 | 0 | 6 |
| cb416_c58/f1p0/2505<br>isoform=cb416_c58;full_length_coverage=1;non_full_length_coverage=0;isoform_length=2505;expected_accuracy=0.993         | gnl BL_ORD_ID 44207 | cb416_c73/f3p0/3007<br>isoform=cb416_c73;full_length_coverage=3;non_full_length_coverage=0;isoform_length=3007;expected_accuracy=0.993           | 286 | 2498 | 4    | 287  | 813  | 300 | 380  | 662 | 6 |   |

|                                                                                                                                                       |                                                                                                                                                                                   |     |      |      |      |     |      |      |      |
|-------------------------------------------------------------------------------------------------------------------------------------------------------|-----------------------------------------------------------------------------------------------------------------------------------------------------------------------------------|-----|------|------|------|-----|------|------|------|
| acy=0.992<br>cb5613_c56/f1p1/2284<br>isoform=cb5613_c56;full_length_coverage=1;non_full_length_coverage=1;isoform_length=2284;expected_accuracy=0.991 | cy=1.000<br>gnl BL_ORD_ID 44685          cb5613_c26/f1p0/3883<br>isoform=cb5613_c26;full_length_coverage=1;non_full_length_coverage=0;isoform_length=3883;expected_accuracy=0.994 | 1   | 1740 | 1737 | 2262 | 157 | 184  | 3361 | 388  |
| cb8564_c34825/f1p2/3200                                                                                                                               | gnl BL_ORD_ID 55195      cb8564_c35170/f1p0/3386                                                                                                                                  | 493 | 3185 | 6    | 492  | 738 | 3399 | 11   | 497  |
| cb13565_c30/f1p12/1678<br>isoform=cb13565_c30;full_length_coverage=1;non_full_length_coverage=12;isoform_length=1678;expected_accuracy=0.999          | gnl BL_ORD_ID 4515          cb6452_c4/f1p3/2166<br>isoform=cb6452_c4;full_length_coverage=1;non_full_length_coverage=3;isoform_length=2166;expected_accuracy=1.000                | 429 | 1624 | 5    | 428  | 948 | 2146 | 2    | 414  |
| cb7023_c7/f1p0/1690                                                                                                                                   | gnl BL_ORD_ID 3662          cb7023_c0/f2p1/2542<br>isoform=cb7023_c0;full_length_coverage=2;non_full_length_coverage=1;isoform_length=2542;expected_accuracy=0.996                | 256 | 1693 | 27   | 258  | 975 | 2412 | 1    | 231  |
| cb2238_c51/f18p0/2624<br>isoform=cb2238_c51;full_length_coverage=18;non_full_length_coverage=0;isoform_length=2624;expected_accuracy=1.000            | gnl BL_ORD_ID 69645      cb2238_c16/f1p0/3348                                                                                                                                     | 138 | 2624 | 1    | 139  | 815 | 3301 | 1    | 139  |
| cb51_c21/f1p0/2442<br>isoform=cb51_c21;full_length_coverage=1;non_full_length_coverage=0;isoform_length=2442;expected_accuracy=0.995                  | gnl BL_ORD_ID 73496      cb51_c27/f1p0/3119                                                                                                                                       | 13  | 2129 | 2129 | 2442 | 1   | 2114 | 2253 | 2567 |
| cb13752_c0/f4p0/1812<br>isoform=cb13752_c0;full_length_coverage=4;non_full_length_coverage=0;isoform_length=1812;expected_accuracy=0.995              | gnl BL_ORD_ID 11857          cb8564_c1417/f1p0/3518<br>isoform=cb8564_c1417;full_length_coverage=1;non_full_length_coverage=0;isoform_length=3518;expected_accuracy=0.995         | 1   | 1376 | 1374 | 1812 | 80  | 1453 | 3081 | 3518 |



|                                                                                                                                                      |                                                                                                                                                                                       |     |      |      |      |      |          |      |          |
|------------------------------------------------------------------------------------------------------------------------------------------------------|---------------------------------------------------------------------------------------------------------------------------------------------------------------------------------------|-----|------|------|------|------|----------|------|----------|
| racy=0.999<br>cb1333_c9/f4p0/1480<br>isoform=cb1333_c9;full_length_coverage=4;non_full_length_coverage=0;isoform_length=1480;expected_accuracy=1.000 | curacy=0.997<br>gnl BL_ORD_ID 25626          cb1333_c96/f1p0/1554<br>isoform=cb1333_c96;full_length_coverage=1;non_full_length_coverage=0;isoform_length=1554;expected_accuracy=0.991 | 153 | 1459 | 29   | 152  | 254  | 155<br>4 | 19   | 142      |
| cb5643_c66/f1p0/2234<br>isoform=cb5643_c66;full_length_coverage=1;non_full_length_coverage=0;isoform_length=2234;expected_accuracy=0.996             | gnl BL_ORD_ID 74222   cb5643_c69/f1p0/2630                                                                                                                                            | 201 | 2234 | 18   | 203  | 557  | 260<br>5 | 156  | 352      |
| cb8564_c185920/f1p0/2777<br>isoform=cb8564_c185920;full_length_coverage=1;non_full_length_coverage=0;isoform_length=2777;expected_accuracy=0.996     | gnl BL_ORD_ID 55317   cb8564_c38251/f1p0/3243                                                                                                                                         | 174 | 2776 | 1    | 177  | 358  | 297<br>3 | 15   | 189      |
| cb18456_c6530/f1p0/1200                                                                                                                              | gnl BL_ORD_ID 35801   cb18456_c7725/f178p4/1767<br>isoform=cb18456_c7725;full_length_coverage=178;non_full_length_coverage=4;isoform_length=1767;expected_accuracy=1.000              | 260 | 1166 | 6    | 259  | 785  | 169<br>1 | 1    | 254      |
| cb2018_c2/f1p0/1820<br>isoform=cb2018_c2;full_length_coverage=1;non_full_length_coverage=0;isoform_length=1820;expected_accuracy=0.990               | gnl BL_ORD_ID 68251   cb2018_c0/f1p0/4091                                                                                                                                             | 199 | 1820 | 91   | 202  | 2102 | 372<br>5 | 3    | 116      |
| cb7320_c16/f1p1/1794<br>isoform=cb7320_c16;full_length_coverage=1;non_full_length_coverage=1;isoform_length=1794;expected_accuracy=0.995             | gnl BL_ORD_ID 7017          cb7320_c2/f3p2/2394<br>isoform=cb7320_c2;full_length_coverage=3;non_full_length_coverage=2;isoform_length=2394;expected_accuracy=1.000                    | 1   | 1400 | 1399 | 1794 | 1    | 140<br>3 | 1985 | 238<br>1 |
| cb8564_c17694/f1p1/3299                                                                                                                              | gnl BL_ORD_ID 65228   cb16355_c11/f1p4/5263                                                                                                                                           | 1   | 2347 | 2347 | 3251 | 1757 | 410      | 4333 | 523      |

|                                                                                                                                                  |                                                                                                                                                                           |      |      |      |      |      |          |      |          |
|--------------------------------------------------------------------------------------------------------------------------------------------------|---------------------------------------------------------------------------------------------------------------------------------------------------------------------------|------|------|------|------|------|----------|------|----------|
|                                                                                                                                                  |                                                                                                                                                                           |      |      |      |      |      |          | 5    | 7        |
| cb12302_c31/f1p0/1548<br>isoform=cb12302_c31;full_length_coverage=1;non_full_length_coverage=0;isoform_length=1548;expected_accuracy=1.000       | gnl BL_ORD_ID 27348      cb1380_c15/f1p6/2382<br>isoform=cb1380_c15;full_length_coverage=1;non_full_length_coverage=6;isoform_length=2382;expected_accuracy=0.995         | 324  | 1548 | 4    | 329  | 565  | 178<br>1 | 1    | 321      |
| cb8564_c125661/f1p1/2227                                                                                                                         | gnl BL_ORD_ID 11919      cb8564_c124232/f1p0/2536<br>isoform=cb8564_c124232;full_length_coverage=1;non_full_length_coverage=0;isoform_length=2536;expected_accuracy=0.997 | 1    | 1180 | 1179 | 2059 | 175  | 135<br>5 | 1656 | 253<br>6 |
| cb8564_c2743/f3p0/2883<br>isoform=cb8564_c2743;full_length_coverage=3;non_full_length_coverage=0;isoform_length=2883;expected_accuracy=0.997     | gnl BL_ORD_ID 14039      cb8564_c2753/f1p0/2971<br>isoform=cb8564_c2753;full_length_coverage=1;non_full_length_coverage=0;isoform_length=2971;expected_accuracy=0.997     | 1273 | 2882 | 118  | 1274 | 1361 | 297<br>1 | 1    | 1157     |
| cb8564_c23232/f1p3/2540                                                                                                                          | gnl BL_ORD_ID 52715      cb8564_c11997/f1p2/2670                                                                                                                          | 16   | 2172 | 2167 | 2518 | 5    | 216<br>1 | 2263 | 261<br>4 |
| cb8564_c182028/f1p0/2513<br>isoform=cb8564_c182028;full_length_coverage=1;non_full_length_coverage=0;isoform_length=2513;expected_accuracy=0.996 | gnl BL_ORD_ID 19105      cb8564_c98209/f1p10/2805<br>isoform=cb8564_c98209;full_length_coverage=1;non_full_length_coverage=10;isoform_length=2805;expected_accuracy=1.000 | 1    | 1971 | 1968 | 2513 | 3    | 197<br>2 | 2116 | 266<br>1 |
| cb1203_c25/f1p0/1362                                                                                                                             | gnl BL_ORD_ID 59262      cb1203_c12/f1p2/4460                                                                                                                             | 157  | 1269 | 3    | 157  | 3269 | 438<br>0 | 2286 | 244<br>0 |
| cb1301_c3/f1p0/2903                                                                                                                              | gnl BL_ORD_ID 61209      cb1301_c4/f1p0/3013                                                                                                                              | 1    | 2061 | 2062 | 2886 | 22   | 208<br>2 | 2198 | 302<br>2 |
| cb3586_c10/f1p0/2722<br>isoform=cb3586_c10;full_length_coverage=1;non_full_length_coverage=0;isoform_length=2722;expected_accuracy=0.996         | gnl BL_ORD_ID 41151      cb3586_c0/f4p0/3057<br>isoform=cb3586_c0;full_length_coverage=4;non_full_length_coverage=0;isoform_length=3057;expected_accuracy=0.995           | 252  | 2722 | 1    | 251  | 498  | 297<br>0 | 97   | 349      |

|                                                                                                                                                                |                                                                                                                                                              |      |      |      |      |      |      |      |      |
|----------------------------------------------------------------------------------------------------------------------------------------------------------------|--------------------------------------------------------------------------------------------------------------------------------------------------------------|------|------|------|------|------|------|------|------|
| racy=0.993<br>cb8564_c146516/f7p0/2412<br>isoform=cb8564_c146516;full_length_coverage=7;non_full_length_coverage=0;isoform_length=2412;expected_accuracy=1.000 | cy=1.000<br>gnl BL_ORD_ID 52094 cb8564_c110646/f1p0/2764                                                                                                     | 1    | 1773 | 1770 | 2411 | 59   | 1810 | 2110 | 2751 |
| cb9434_c3/f2p0/1464<br>isoform=cb9434_c3;full_length_coverage=2;non_full_length_coverage=0;isoform_length=1464;expected_accuracy=1.000                         | gnl BL_ORD_ID 58717 cb9434_c4/f1p0/2082                                                                                                                      | 1    | 1192 | 1190 | 1448 | 5    | 1197 | 1821 | 2079 |
| cb7972_c4/f1p0/2284<br>isoform=cb7972_c4;full_length_coverage=1;non_full_length_coverage=0;isoform_length=2284;expected_accuracy=0.990                         | gnl BL_ORD_ID 8320 cb7972_c0/f3p0/2450<br>isoform=cb7972_c0;full_length_coverage=3;non_full_length_coverage=0;isoform_length=2450;expected_accuracy=0.998    | 1    | 1463 | 1460 | 2224 | 40   | 1504 | 1682 | 2448 |
| cb1279_c11/f2p3/3084<br>isoform=cb1279_c11;full_length_coverage=2;non_full_length_coverage=3;isoform_length=3084;expected_accuracy=1.000                       | gnl BL_ORD_ID 27065 cb1279_c46/f1p3/3121<br>isoform=cb1279_c46;full_length_coverage=1;non_full_length_coverage=3;isoform_length=3121;expected_accuracy=1.000 | 236  | 2937 | 1    | 237  | 420  | 3121 | 2    | 245  |
| cb8564_c188097/f1p0/2552<br>isoform=cb8564_c188097;full_length_coverage=1;non_full_length_coverage=0;isoform_length=2552;expected_accuracy=0.996               | gnl BL_ORD_ID 54449 cb8564_c122906/f2p13/2871                                                                                                                | 1    | 1945 | 1940 | 2552 | 135  | 2079 | 2182 | 2794 |
| cb5221_c7/f1p0/3686<br>isoform=cb5221_c7;full_length_coverage=1;non_full_length_coverage=0;isoform_length=3686;expected_accuracy=0.996                         | gnl BL_ORD_ID 45936 cb5221_c6/f1p0/4147<br>isoform=cb5221_c6;full_length_coverage=1;non_full_length_coverage=0;isoform_length=4147;expected_accuracy=0.998   | 1106 | 3529 | 1    | 1105 | 1726 | 4147 | 1    | 1105 |
| cb3163_c12/f1p0/2539                                                                                                                                           | gnl BL_ORD_ID 37035 cb3163_c23/f9p0/2749                                                                                                                     | 1    | 1656 | 1654 | 2539 | 76   | 173  | 1861 | 274  |

|                                                                                                                                             |                                                                                                                                                                    |     |      |      |      |      |      |      |     |   |
|---------------------------------------------------------------------------------------------------------------------------------------------|--------------------------------------------------------------------------------------------------------------------------------------------------------------------|-----|------|------|------|------|------|------|-----|---|
| isoform=cb3163_c12;full_length_coverage=1;non_full_length_coverage=0;isoform_length=2539;expected_accuracy=0.994<br>cb8564_c49562/f1p0/2838 | isoform=cb3163_c23;full_length_coverage=9;non_full_length_coverage=0;isoform_length=2749;expected_accuracy=1.000                                                   |     |      |      |      |      |      | 8    |     | 7 |
| isoform=cb8564_c49562;full_length_coverage=1;non_full_length_coverage=0;isoform_length=2838;expected_accuracy=0.995                         | gnl BL_ORD_ID 55912 cb8564_c48681/f1p0/3431                                                                                                                        | 12  | 2331 | 2327 | 2838 | 6    | 232  | 2701 | 321 | 6 |
| cb8564_c10938/f1p1/2321                                                                                                                     | gnl BL_ORD_ID 53631 cb8564_c135683/f2p4/3808                                                                                                                       | 1   | 1315 | 1310 | 2292 | 1169 | 248  | 2602 | 358 | 4 |
| cb8564_c34825/f1p2/3200                                                                                                                     | gnl BL_ORD_ID 16149 cb8564_c47162/f1p0/3361<br>isoform=cb8564_c47162;full_length_coverage=1;non_full_length_coverage=0;isoform_length=3361;expected_accuracy=0.996 | 395 | 3194 | 6    | 396  | 592  | 336  | 11   | 402 |   |
| cb12714_c29/f1p2/1583                                                                                                                       | gnl BL_ORD_ID 55945 cb8564_c49862/f1p0/2807                                                                                                                        | 1   | 1296 | 1293 | 1594 | 1    | 129  | 2412 | 271 | 3 |
| cb4744_c6/f1p0/1496<br>isoform=cb4744_c6;full_length_coverage=1;non_full_length_coverage=0;isoform_length=1496;expected_accuracy=0.997      | gnl BL_ORD_ID 44018 cb4744_c0/f2p0/2942<br>isoform=cb4744_c0;full_length_coverage=2;non_full_length_coverage=0;isoform_length=2942;expected_accuracy=0.997         | 1   | 1159 | 1160 | 1496 | 1    | 1151 | 2565 | 290 | 1 |
| cb4957_c12/f1p0/1876<br>isoform=cb4957_c12;full_length_coverage=1;non_full_length_coverage=0;isoform_length=1876;expected_accuracy=1.000    | gnl BL_ORD_ID 41850 cb4957_c0/f1p0/3218<br>isoform=cb4957_c0;full_length_coverage=1;non_full_length_coverage=0;isoform_length=3218;expected_accuracy=0.996         | 1   | 1467 | 1468 | 1869 | 131  | 157  | 2818 | 321 | 8 |
| cb8564_c48473/f1p2/2701<br>isoform=cb8564_c48473;full_length_coverage=1;non_full_length_coverage=2;isoform_length=2701;expected_            | gnl BL_ORD_ID 10800 cb8564_c10037/f1p5/2946<br>isoform=cb8564_c10037;full_length_coverage=1;non_full_length_coverage=5;isoform_length=2946;expected_ac             | 220 | 2701 | 1    | 225  | 470  | 294  | 36   | 260 | 6 |

|                                                                                                                     |                                                                                                                     |     |      |      |      |      |      |      |      |  |
|---------------------------------------------------------------------------------------------------------------------|---------------------------------------------------------------------------------------------------------------------|-----|------|------|------|------|------|------|------|--|
| accuracy=0.999                                                                                                      | curacy=0.994                                                                                                        |     |      |      |      |      |      |      |      |  |
| cb8564_c5070/f1p0/2861                                                                                              | gnl BL_ORD_ID 56566 cb8564_c5065/f1p0/3147                                                                          | 10  | 1660 | 1659 | 2831 | 35   | 1685 | 1578 | 2749 |  |
| cb17884_c0/f3p1/1879                                                                                                | gnl BL_ORD_ID 17831 cb8564_c84290/f1p0/3355                                                                         |     |      |      |      |      |      |      |      |  |
| isoform=cb17884_c0;full_length_coverage=3;non_full_length_coverage=1;isoform_length=1879;expected_accuracy=1.000    | isoform=cb8564_c84290;full_length_coverage=1;non_full_length_coverage=0;isoform_length=3355;expected_accuracy=0.998 | 391 | 1879 | 4    | 394  | 1872 | 3353 | 14   | 407  |  |
| cb6390_c0/f5p0/2306                                                                                                 | gnl BL_ORD_ID 3696 cb6390_c2/f1p0/2643                                                                              |     |      |      |      |      |      |      |      |  |
| isoform=cb6390_c0;full_length_coverage=5;non_full_length_coverage=0;isoform_length=2306;expected_accuracy=1.000     | isoform=cb6390_c2;full_length_coverage=1;non_full_length_coverage=0;isoform_length=2643;expected_accuracy=0.998     | 1   | 1577 | 1575 | 2306 | 203  | 1776 | 1912 | 2643 |  |
| cb3485_c11/f1p0/2449                                                                                                | gnl BL_ORD_ID 40922 cb3485_c4/f1p0/3162                                                                             |     |      |      |      |      |      |      |      |  |
|                                                                                                                     | isoform=cb3485_c4;full_length_coverage=1;non_full_length_coverage=0;isoform_length=3162;expected_accuracy=0.996     | 1   | 1248 | 1246 | 2416 | 129  | 1375 | 1834 | 3003 |  |
| cb8564_c36827/f1p1/3524                                                                                             | gnl BL_ORD_ID 13964 cb8564_c46693/f1p0/4471                                                                         |     |      |      |      |      |      |      |      |  |
| isoform=cb8564_c36827;full_length_coverage=1;non_full_length_coverage=1;isoform_length=3524;expected_accuracy=0.997 | isoform=cb8564_c46693;full_length_coverage=1;non_full_length_coverage=0;isoform_length=4471;expected_accuracy=0.994 | 2   | 3014 | 3012 | 3524 | 1    | 3044 | 3299 | 3823 |  |
| cb8564_c23232/f1p3/2540                                                                                             | gnl BL_ORD_ID 55450 cb8564_c41908/f1p0/2743                                                                         |     |      |      |      |      |      |      |      |  |
| cb8564_c44005/f1p0/3815                                                                                             | gnl BL_ORD_ID 55964 cb8564_c50435/f1p0/4916                                                                         |     |      |      |      |      |      |      |      |  |
| isoform=cb8564_c44005;full_length_coverage=1;non_full_length_coverage=0;isoform_length=3815;expected_accuracy=0.993 |                                                                                                                     | 18  | 2046 | 2041 | 3773 | 4    | 2041 | 2141 | 3881 |  |
| cb4007_c19/f1p0/2782                                                                                                | gnl BL_ORD_ID 71719 cb4007_c46/f1p0/3154                                                                            |     |      |      |      |      |      |      |      |  |
|                                                                                                                     |                                                                                                                     | 136 | 1938 | 1937 | 2778 | 1    | 180  | 2145 | 298  |  |

|                                                                                                                  |                     |                         |                                                                                                                     |    |      |      |      |     |      |      |      |
|------------------------------------------------------------------------------------------------------------------|---------------------|-------------------------|---------------------------------------------------------------------------------------------------------------------|----|------|------|------|-----|------|------|------|
| isoform=cb4007_c19;full_length_coverage=1;non_full_length_coverage=0;isoform_length=2782;expected_accuracy=0.995 |                     |                         |                                                                                                                     |    |      |      |      | 3   |      | 5    |      |
| cb5550_c20/f1p0/3027                                                                                             | gnl BL_ORD_ID 45197 | cb5550_c10/f1p0/4832    | isoform=cb5550_c10;full_length_coverage=1;non_full_length_coverage=0;isoform_length=4832;expected_accuracy=0.998    | 10 | 2608 | 2603 | 2890 | 1   | 2599 | 4545 | 4832 |
| cb14634_c52/f1p1/4305                                                                                            | gnl BL_ORD_ID 27757 | cb14634_c75/f2p3/4631   | isoform=cb14634_c75;full_length_coverage=2;non_full_length_coverage=3;isoform_length=4631;expected_accuracy=0.996   | 23 | 2658 | 2653 | 4320 | 1   | 2636 | 2754 | 4418 |
| cb8564_c23232/f1p3/2540                                                                                          | gnl BL_ORD_ID 17008 | cb8564_c55271/f1p4/2648 | isoform=cb8564_c55271;full_length_coverage=1;non_full_length_coverage=4;isoform_length=2648;expected_accuracy=0.998 | 16 | 2172 | 2167 | 2511 | 6   | 2175 | 2277 | 2616 |
| cb12931_c15/f1p0/1493                                                                                            | gnl BL_ORD_ID 61972 | cb12931_c30/f1p0/5903   | isoform=cb12931_c15;full_length_coverage=1;non_full_length_coverage=0;isoform_length=1493;expected_accuracy=1.000   | 1  | 1106 | 1104 | 1493 | 1   | 1100 | 2480 | 2869 |
| cb2804_c78/f1p1/3184                                                                                             | gnl BL_ORD_ID 38356 | cb2804_c93/f1p0/3636    | isoform=cb2804_c78;full_length_coverage=1;non_full_length_coverage=1;isoform_length=3184;expected_accuracy=0.994    | 2  | 2528 | 2526 | 3148 | 1   | 2511 | 2771 | 3390 |
| cb2707_c10/f3p0/2850                                                                                             | gnl BL_ORD_ID 36995 | cb2707_c28/f1p1/3570    | isoform=cb2707_c10;full_length_coverage=3;non_full_length_coverage=0;isoform_length=2850;expected_accuracy=0.995    | 1  | 2379 | 2379 | 2850 | 309 | 2684 | 3012 | 3483 |

|                                                                                                                                                              |                                                                                                                                                                    |     |      |      |      |     |      |      |      |
|--------------------------------------------------------------------------------------------------------------------------------------------------------------|--------------------------------------------------------------------------------------------------------------------------------------------------------------------|-----|------|------|------|-----|------|------|------|
| racy=1.000<br>cb8564_c40764/f1p0/2563<br>isoform=cb8564_c40764;full_length_coverage=1;non_full_length_coverage=0;isoform_length=2563;expected_accuracy=0.997 | acy=0.996<br>gnl BL_ORD_ID 55464 cb8564_c42285/f1p0/3370                                                                                                           | 1   | 2166 | 2162 | 2563 | 1   | 2162 | 2370 | 2771 |
| cb2779_c5/f1p0/1790<br>isoform=cb2779_c5;full_length_coverage=1;non_full_length_coverage=0;isoform_length=1790;expected_accuracy=0.993                       | gnl BL_ORD_ID 39065 cb2779_c3/f1p1/3765<br>isoform=cb2779_c3;full_length_coverage=1;non_full_length_coverage=1;isoform_length=3765;expected_accuracy=0.991         | 1   | 1078 | 1077 | 1788 | 17  | 1098 | 2990 | 3697 |
| cb8564_c71816/f1p1/3018                                                                                                                                      | gnl BL_ORD_ID 17471 cb8564_c8798/f12p2/2958<br>isoform=cb8564_c8798;full_length_coverage=12;non_full_length_coverage=2;isoform_length=2958;expected_accuracy=1.000 | 1   | 2019 | 2020 | 2923 | 138 | 2155 | 2055 | 2958 |
| cb18456_c1776/f1p0/1211                                                                                                                                      | gnl BL_ORD_ID 53550 cb8564_c128527/f1p1/2034                                                                                                                       | 280 | 1214 | 8    | 285  | 964 | 30   | 1350 | 1076 |
| cb792_c53/f1p0/3930                                                                                                                                          | gnl BL_ORD_ID 50981 cb792_c47/f1p0/3981                                                                                                                            | 1   | 1842 | 1838 | 3663 | 104 | 1945 | 2076 | 3901 |
| cb2804_c187/f1p0/1491                                                                                                                                        | gnl BL_ORD_ID 38911 cb2804_c50/f2p0/2193<br>isoform=cb2804_c50;full_length_coverage=2;non_full_length_coverage=0;isoform_length=2193;expected_accuracy=0.992       | 133 | 1425 | 1    | 135  | 619 | 1909 | 1    | 133  |
| cb6889_c8/f1p0/2744                                                                                                                                          | gnl BL_ORD_ID 5980 cb6889_c7/f3p1/2671<br>isoform=cb6889_c7;full_length_coverage=3;non_full_length_coverage=1;isoform_length=2671;expected_accuracy=1.000          | 330 | 2348 | 41   | 335  | 653 | 2671 | 1    | 295  |
| cb426_c6/f1p0/2161                                                                                                                                           | gnl BL_ORD_ID 42757 cb426_c2/f1p0/2463                                                                                                                             | 1   | 1852 | 1847 | 2110 | 47  | 189  | 2201 | 246  |

|                                                                                                                     |                                                                                                                  |      |      |      |      |      |      |      |     |   |
|---------------------------------------------------------------------------------------------------------------------|------------------------------------------------------------------------------------------------------------------|------|------|------|------|------|------|------|-----|---|
|                                                                                                                     | isoform=cb426_c2;full_length_coverage=1;non_full_length_coverage=0;isoform_length=2463;expected_accuracy=0.998   |      |      |      |      |      |      | 7    |     | 3 |
| cb6448_c5/f2p0/2744                                                                                                 | gnl BL_ORD_ID 4720                      cb6448_c6/f1p0/3003                                                      |      |      |      |      |      |      |      |     |   |
| isoform=cb6448_c5;full_length_coverage=2;non_full_length_coverage=0;isoform_length=2744;expected_accuracy=1.000     | isoform=cb6448_c6;full_length_coverage=1;non_full_length_coverage=0;isoform_length=3003;expected_accuracy=0.995  | 1    | 2401 | 2402 | 2744 | 84   | 247  | 2630 | 297 | 3 |
| cb8564_c36056/f1p0/2652                                                                                             | gnl BL_ORD_ID 55160 cb8564_c34262/f1p0/3120                                                                      | 248  | 2652 | 131  | 251  | 419  | 282  | 155  | 275 |   |
| isoform=cb8564_c36056;full_length_coverage=1;non_full_length_coverage=0;isoform_length=2652;expected_accuracy=0.999 |                                                                                                                  |      |      |      |      |      | 4    |      |     |   |
| cb8564_c86635/f1p17/2750                                                                                            | gnl BL_ORD_ID 56381 cb8564_c75626/f1p2/3199                                                                      | 1    | 2113 | 2111 | 2699 | 4    | 2116 | 2611 | 319 | 9 |
| cb1626_c14/f1p0/2173                                                                                                | gnl BL_ORD_ID 33068                      cb1626_c13/f1p0/4596                                                    |      |      |      |      |      |      |      |     |   |
| isoform=cb1626_c14;full_length_coverage=1;non_full_length_coverage=0;isoform_length=2173;expected_accuracy=0.999    | isoform=cb1626_c13;full_length_coverage=1;non_full_length_coverage=0;isoform_length=4596;expected_accuracy=1.000 | 1001 | 2169 | 1    | 1002 | 3426 | 459  | 77   | 108 | 0 |
|                                                                                                                     | gnl BL_ORD_ID 6173                      cb6621_c0/f1p0/2807                                                      |      |      |      |      |      |      |      |     |   |
| cb6621_c2/f1p0/2658                                                                                                 | isoform=cb6621_c0;full_length_coverage=1;non_full_length_coverage=0;isoform_length=2807;expected_accuracy=0.996  | 214  | 2557 | 17   | 217  | 463  | 280  | 1    | 201 |   |
|                                                                                                                     |                                                                                                                  |      |      |      |      |      | 6    |      |     |   |
| cb5431_c1/f1p0/2992                                                                                                 | gnl BL_ORD_ID 73915 cb5431_c0/f1p0/3094                                                                          | 14   | 2811 | 2808 | 2992 | 1    | 279  | 2895 | 307 | 8 |
| isoform=cb5431_c1;full_length_coverage=1;non_full_length_coverage=0;isoform_length=2992;expected_accuracy=0.994     |                                                                                                                  |      |      |      |      |      | 5    |      |     |   |
| cb8564_c89122/f1p0/3335                                                                                             | gnl BL_ORD_ID 14585                      cb8564_c36952/f1p0/3622                                                 | 528  | 2915 | 81   | 528  | 1229 | 360  | 22   | 471 |   |



|                          |                                                                                                                                                                          |      |      |      |      |      |      |      |      |
|--------------------------|--------------------------------------------------------------------------------------------------------------------------------------------------------------------------|------|------|------|------|------|------|------|------|
|                          | isoform=cb8564_c36952;full_length_coverage=1;non_full_length_coverage=0;isoform_length=3622;expected_accuracy=0.994                                                      |      |      |      |      |      |      |      | 9    |
| cb8564_c49356/f1p0/3133  | gnl BL_ORD_ID 14407      cb8564_c44036/f1p0/3258<br>isoform=cb8564_c44036;full_length_coverage=1;non_full_length_coverage=0;isoform_length=3258;expected_accuracy=0.992  | 1144 | 2848 | 1    | 1144 | 1575 | 3258 | 1    | 1147 |
| cb8564_c79401/f1p0/4816  | gnl BL_ORD_ID 35088      cb18812_c9/f1p1/5153<br>isoform=cb18812_c9;full_length_coverage=1;non_full_length_coverage=1;isoform_length=5153;expected_accuracy=0.993        | 1072 | 4399 | 1    | 1068 | 1823 | 5153 | 866  | 1936 |
| cb396_c48/f1p0/2172      | gnl BL_ORD_ID 39524      cb396_c4/f9p0/2621<br>isoform=cb396_c4;full_length_coverage=9;non_full_length_coverage=0;isoform_length=2621;expected_accuracy=1.000            | 238  | 2104 | 4    | 238  | 644  | 2509 | 161  | 395  |
| cb8564_c183213/f1p3/3190 | gnl BL_ORD_ID 18665      cb8564_c78920/f1p1/3989<br>isoform=cb8564_c183213;full_length_coverage=1;non_full_length_coverage=3;isoform_length=3190;expected_accuracy=0.999 | 1    | 2313 | 2318 | 3190 | 1    | 2312 | 3128 | 3989 |
| cb3898_c1/f3p1/2663      | gnl BL_ORD_ID 39329      cb3898_c5/f1p0/2807<br>isoform=cb3898_c1;full_length_coverage=3;non_full_length_coverage=1;isoform_length=2663;expected_accuracy=0.999          | 1    | 1316 | 1315 | 2609 | 14   | 1333 | 1513 | 2807 |
| cb8564_c129284/f1p0/2118 | gnl BL_ORD_ID 13455      cb8564_c182847/f1p0/2435<br>isoform=cb8564_c129284;full_length_coverage=1;non_full_length_coverage=0;isoform_length=2118;expected_a             | 1    | 1970 | 1965 | 2118 | 42   | 2023 | 2206 | 2360 |

|                                                                                                                                                                  |                                                                                                                                                                                          |     |      |      |      |      |      |      |      |
|------------------------------------------------------------------------------------------------------------------------------------------------------------------|------------------------------------------------------------------------------------------------------------------------------------------------------------------------------------------|-----|------|------|------|------|------|------|------|
| accuracy=0.991<br>cb8564_c45242/f1p0/2126<br>isoform=cb8564_c45242;full_length_coverage=1;non_full_length_coverage=0;isoform_length=2126;expected_accuracy=0.990 | ccuracy=1.000<br>gnl BL_ORD_ID 16705      cb8564_c53880/f1p0/3484<br>isoform=cb8564_c53880;full_length_coverage=1;non_full_length_coverage=0;isoform_length=3484;expected_accuracy=0.996 | 320 | 2125 | 71   | 321  | 1672 | 3484 | 807  | 1056 |
| cb3039_c11/f1p0/3305                                                                                                                                             | gnl BL_ORD_ID 69065      cb3039_c9/f1p0/3676                                                                                                                                             | 131 | 3353 | 1    | 133  | 362  | 3584 | 53   | 185  |
| cb8564_c38947/f1p0/2650<br>isoform=cb8564_c38947;full_length_coverage=1;non_full_length_coverage=0;isoform_length=2650;expected_accuracy=0.996                   | gnl BL_ORD_ID 55574      cb8564_c45699/f1p0/3005                                                                                                                                         | 1   | 1441 | 1436 | 2650 | 1    | 1421 | 1636 | 2848 |
| cb14630_c37/f1p1/5449<br>isoform=cb14630_c37;full_length_coverage=1;non_full_length_coverage=1;isoform_length=5449;expected_accuracy=0.996                       | gnl BL_ORD_ID 64186      cb14630_c30/f1p0/5869                                                                                                                                           | 1   | 4273 | 4268 | 5449 | 31   | 4301 | 4474 | 5657 |
| cb8637_c62/f1p0/1631                                                                                                                                             | gnl BL_ORD_ID 19203      cb8637_c50/f9p0/1981<br>isoform=cb8637_c50;full_length_coverage=9;non_full_length_coverage=0;isoform_length=1981;expected_accuracy=1.000                        | 673 | 1595 | 75   | 678  | 1030 | 1952 | 111  | 714  |
| cb10162_c7/f1p0/1683<br>isoform=cb10162_c7;full_length_coverage=1;non_full_length_coverage=0;isoform_length=1683;expected_accuracy=0.995                         | gnl BL_ORD_ID 48152      cb10162_c4/f1p0/1934                                                                                                                                            | 1   | 1235 | 1238 | 1679 | 105  | 1338 | 1506 | 1933 |
| cb18456_c6049/f1p1/1546<br>isoform=cb18456_c6049;full_length_coverage=1;non_full_length_coverage=1;isoform_length=1546;expected_                                 | gnl BL_ORD_ID 17669      cb8564_c868/f2p9/1907<br>isoform=cb8564_c868;full_length_coverage=2;non_full_length_coverage=9;isoform_length=1907;expected_acc                                 | 294 | 1512 | 5    | 294  | 690  | 1907 | 1    | 285  |

|                                                                                                                                                              |                                                                                                                                                                                                      |      |      |      |      |      |          |      |          |
|--------------------------------------------------------------------------------------------------------------------------------------------------------------|------------------------------------------------------------------------------------------------------------------------------------------------------------------------------------------------------|------|------|------|------|------|----------|------|----------|
| accuracy=0.991<br>cb7642_c201/f1p0/1831<br>isoform=cb7642_c201;full_length_coverage=1;non_full_length_coverage=0;isoform_length=1831;expected_accuracy=0.992 | accuracy=1.000<br>gnl BL_ORD_ID 6564                      cb7642_c135/f1p0/2317<br>isoform=cb7642_c135;full_length_coverage=1;non_full_length_coverage=0;isoform_length=2317;expected_accuracy=0.992 | 1    | 1029 | 1028 | 1831 | 263  | 129<br>6 | 1513 | 231<br>5 |
| cb8564_c41692/f1p3/2987<br>isoform=cb8564_c41692;full_length_coverage=1;non_full_length_coverage=3;isoform_length=2987;expected_accuracy=0.995               | gnl BL_ORD_ID 17429                      cb8564_c85447/f1p0/3196<br>isoform=cb8564_c85447;full_length_coverage=1;non_full_length_coverage=0;isoform_length=3196;expected_accuracy=0.997              | 1    | 2450 | 2449 | 2987 | 3    | 241<br>3 | 2660 | 319<br>2 |
| cb6968_c6/f1p0/2273<br>isoform=cb6968_c6;full_length_coverage=1;non_full_length_coverage=0;isoform_length=2273;expected_accuracy=0.996                       | gnl BL_ORD_ID 6148                      cb6968_c18/f2p0/2681<br>isoform=cb6968_c18;full_length_coverage=2;non_full_length_coverage=0;isoform_length=2681;expected_accuracy=1.000                     | 185  | 2273 | 1    | 185  | 434  | 252<br>3 | 89   | 274      |
| cb4932_c8/f1p1/1956<br>isoform=cb4932_c8;full_length_coverage=1;non_full_length_coverage=1;isoform_length=1956;expected_accuracy=0.992                       | gnl BL_ORD_ID 42883                      cb4932_c5/f1p0/2219<br>isoform=cb4932_c5;full_length_coverage=1;non_full_length_coverage=0;isoform_length=2219;expected_accuracy=1.000                      | 1    | 1130 | 1129 | 1871 | 1    | 1132     | 1475 | 221<br>9 |
| cb2156_c24/f1p1/2545<br>isoform=cb2156_c24;full_length_coverage=1;non_full_length_coverage=1;isoform_length=2545;expected_accuracy=0.991                     | gnl BL_ORD_ID 35008                      cb2156_c83/f2p1/2873<br>isoform=cb2156_c83;full_length_coverage=2;non_full_length_coverage=1;isoform_length=2873;expected_accuracy=1.000                    | 1    | 1422 | 1420 | 2545 | 164  | 160<br>5 | 1730 | 286<br>0 |
| cb8564_c86591/f1p1/3640<br>isoform=cb8564_c86591;full_length_coverage=1;non_full_length_coverage=1;isoform_length=3640;expected_accuracy=0.997               | gnl BL_ORD_ID 57819                      cb8564_c81742/f1p0/3716                                                                                                                                     | 1791 | 3515 | 1    | 1792 | 1981 | 370<br>4 | 1    | 177<br>8 |
| cb8564_c40953/f1p3/3141                                                                                                                                      | gnl BL_ORD_ID 16338                      cb8564_c53034/f1p2/3495                                                                                                                                     | 113  | 3119 | 1    | 117  | 468  | 349      | 29   | 145      |

|                                                                                                                                             |                                                                                                                                                                                      |     |      |      |      |      |      |      |      |   |
|---------------------------------------------------------------------------------------------------------------------------------------------|--------------------------------------------------------------------------------------------------------------------------------------------------------------------------------------|-----|------|------|------|------|------|------|------|---|
| isoform=cb8564_c40953;full_length_coverage=1;non_full_length_coverage=3;isoform_length=3141;expected_accuracy=0.997<br>cb1279_c85/f1p0/1794 | isoform=cb8564_c53034;full_length_coverage=1;non_full_length_coverage=2;isoform_length=3495;expected_accuracy=0.998<br>gnl BL_ORD_ID 27062                      cb1279_c41/f1p1/2811 |     |      |      |      |      |      |      |      | 5 |
| isoform=cb1279_c85;full_length_coverage=1;non_full_length_coverage=0;isoform_length=1794;expected_accuracy=0.998<br>cb8564_c42814/f1p0/2151 | isoform=cb1279_c41;full_length_coverage=1;non_full_length_coverage=1;isoform_length=2811;expected_accuracy=0.995<br>gnl BL_ORD_ID 61972   cb12931_c30/f1p0/5903                      | 1   | 1120 | 1115 | 1794 | 41   | 1155 | 2143 | 2811 |   |
| isoform=cb8564_c42814;full_length_coverage=1;non_full_length_coverage=0;isoform_length=2151;expected_accuracy=0.993<br>cb4016_c32/f1p0/1913 | gnl BL_ORD_ID 40526                      cb4016_c7/f1p0/2879<br>isoform=cb4016_c7;full_length_coverage=1;non_full_length_coverage=0;isoform_length=2879;expected_accuracy=0.998      | 650 | 2151 | 7    | 652  | 1362 | 2866 | 1    | 674  |   |
| cb4016_c32/f1p0/1913                                                                                                                        | gnl BL_ORD_ID 37200                      cb2640_c10/f1p0/3278<br>isoform=cb2640_c10;full_length_coverage=1;non_full_length_coverage=0;isoform_length=3278;expected_accuracy=0.993    | 191 | 1930 | 23   | 194  | 1105 | 2844 | 504  | 677  |   |
| cb2640_c23/f1p0/2402                                                                                                                        | gnl BL_ORD_ID 4849                      cb7168_c13/f1p1/2387<br>isoform=cb7168_c13;full_length_coverage=1;non_full_length_coverage=1;isoform_length=2387;expected_accuracy=0.993     | 1   | 2036 | 2038 | 2406 | 1    | 2061 | 2788 | 3157 |   |
| cb7168_c7/f1p1/2326                                                                                                                         | gnl BL_ORD_ID 67930   cb18656_c10/f1p0/5311                                                                                                                                          | 1   | 1935 | 1934 | 2218 | 1    | 1932 | 2103 | 2387 |   |
| cb8564_c87089/f1p0/4524                                                                                                                     | gnl BL_ORD_ID 16165                      cb8564_c75981/f2p0/4046                                                                                                                     | 1   | 3980 | 3981 | 4466 | 123  | 4102 | 4844 | 5328 |   |
| cb15911_c2/f1p0/1696                                                                                                                        |                                                                                                                                                                                      | 1   | 1122 | 1120 | 1696 | 9    | 1129 | 3470 | 404  |   |

|                                                                                                                                               |                                                                                                                                                                                                   |      |      |      |      |      |     |      |     |   |
|-----------------------------------------------------------------------------------------------------------------------------------------------|---------------------------------------------------------------------------------------------------------------------------------------------------------------------------------------------------|------|------|------|------|------|-----|------|-----|---|
| isoform=cb15911_c2;full_length_coverage=1;non_full_length_coverage=0;isoform_length=1696;expected_accuracy=0.993<br>cb17744_c21/f1p1/1357     | isoform=cb8564_c75981;full_length_coverage=2;non_full_length_coverage=0;isoform_length=4046;expected_accuracy=0.995<br>gnl BL_ORD_ID 31103                      cb17744_c12/f1p0/5455             |      |      |      |      |      |     |      |     | 5 |
| isoform=cb17744_c21;full_length_coverage=1;non_full_length_coverage=1;isoform_length=1357;expected_accuracy=0.997<br>cb8564_c129284/f1p0/2118 | isoform=cb17744_c12;full_length_coverage=1;non_full_length_coverage=0;isoform_length=5455;expected_accuracy=0.998<br>gnl BL_ORD_ID 11977                      cb8564_c146395/f9p1/2471            | 470  | 1357 | 63   | 470  | 4443 | 532 | 1    | 407 |   |
| isoform=cb8564_c129284;full_length_coverage=1;non_full_length_coverage=0;isoform_length=2118;expected_accuracy=0.991<br>cb1038_c3/f1p0/3023   | isoform=cb8564_c146395;full_length_coverage=9;non_full_length_coverage=1;isoform_length=2471;expected_accuracy=0.998<br>gnl BL_ORD_ID 53                                      cb1038_c2/f1p0/3151 | 1    | 1970 | 1965 | 2118 | 1    | 198 | 2165 | 231 |   |
| isoform=cb1038_c2;full_length_coverage=1;non_full_length_coverage=0;isoform_length=3151;expected_accuracy=0.995<br>cb8564_c34922/f1p0/2696    | isoform=cb1038_c2;full_length_coverage=1;non_full_length_coverage=0;isoform_length=3151;expected_accuracy=0.995<br>gnl BL_ORD_ID 16705                      cb8564_c53880/f1p0/3484               | 1    | 2444 | 2440 | 2839 | 54   | 249 | 2733 | 313 |   |
| isoform=cb8564_c34922;full_length_coverage=1;non_full_length_coverage=0;isoform_length=2696;expected_accuracy=0.993<br>cb513_c3/f1p0/2903     | isoform=cb8564_c53880;full_length_coverage=1;non_full_length_coverage=0;isoform_length=3484;expected_accuracy=0.996<br>gnl BL_ORD_ID 43725                      cb513_c4/f1p0/3166                | 1053 | 2696 | 1    | 1054 | 1672 | 334 | 1    | 105 |   |
| isoform=cb513_c3;full_length_coverage=1;non_full_length_coverage=0;isoform_length=2903;expected_accuracy=1.000<br>cb8123_c3/f1p0/2320         | isoform=cb513_c4;full_length_coverage=1;non_full_length_coverage=0;isoform_length=3166;expected_accuracy=0.995<br>gnl BL_ORD_ID 8831                                      cb8123_c4/f1p0/3382     | 1    | 2041 | 2040 | 2902 | 85   | 214 | 2304 | 316 |   |
| isoform=cb8123_c3;full_length_coverage=1;non_full_length_coverage=0;isoform_length=2320;expected_accuracy=0.993                               | isoform=cb8123_c4;full_length_coverage=1;non_full_length_coverage=0;isoform_length=3382;expected_accuracy=0.993                                                                                   | 251  | 2306 | 45   | 250  | 1270 | 332 | 1    | 208 |   |

|                                                                                                                                                |                                                                                                                                                                           |     |      |      |      |      |          |      |          |  |
|------------------------------------------------------------------------------------------------------------------------------------------------|---------------------------------------------------------------------------------------------------------------------------------------------------------------------------|-----|------|------|------|------|----------|------|----------|--|
| acy=0.992                                                                                                                                      | cy=0.996                                                                                                                                                                  |     |      |      |      |      |          |      |          |  |
| cb13938_c10/f1p0/1187                                                                                                                          | gnl BL_ORD_ID 72021 cb4825_c12/f1p0/4476                                                                                                                                  | 151 | 1146 | 4    | 150  | 3496 | 449<br>1 | 2473 | 261<br>9 |  |
| cb8564_c89918/f1p1/2045<br>isoform=cb8564_c89918;full_length_coverage=1;non_full_length_coverage=1;isoform_length=2045;expected_accuracy=0.991 | gnl BL_ORD_ID 12415      cb8564_c147167/f5p5/2396<br>isoform=cb8564_c147167;full_length_coverage=5;non_full_length_coverage=5;isoform_length=2396;expected_accuracy=0.996 | 1   | 1616 | 1611 | 2045 | 92   | 171<br>3 | 1908 | 234<br>2 |  |
| cb4363_c5/f1p0/1115<br>isoform=cb4363_c5;full_length_coverage=1;non_full_length_coverage=0;isoform_length=1115;expected_accuracy=1.000         | gnl BL_ORD_ID 41671      cb4363_c4/f1p0/1267<br>isoform=cb4363_c4;full_length_coverage=1;non_full_length_coverage=0;isoform_length=1267;expected_accuracy=1.000           | 556 | 1115 | 56   | 558  | 691  | 125<br>0 | 38   | 540      |  |
| cb18646_c1/f2p2/6581<br>isoform=cb18646_c1;full_length_coverage=2;non_full_length_coverage=2;isoform_length=6581;expected_accuracy=0.999       | gnl BL_ORD_ID 34398      cb18646_c0/f2p2/6586<br>isoform=cb18646_c0;full_length_coverage=2;non_full_length_coverage=2;isoform_length=6586;expected_accuracy=0.999         | 1   | 6228 | 6226 | 6425 | 23   | 626<br>5 | 6390 | 658<br>6 |  |
| cb8564_c4687/f1p0/2736<br>isoform=cb8564_c4687;full_length_coverage=1;non_full_length_coverage=0;isoform_length=2736;expected_accuracy=0.995   | gnl BL_ORD_ID 15232      cb8564_c4689/f1p0/4442<br>isoform=cb8564_c4689;full_length_coverage=1;non_full_length_coverage=0;isoform_length=4442;expected_accuracy=0.997     | 247 | 2736 | 1    | 248  | 1870 | 436<br>3 | 1    | 245      |  |
| cb8564_c21515/f1p0/3130                                                                                                                        | gnl BL_ORD_ID 12196      cb8564_c12654/f2p0/4122<br>isoform=cb8564_c12654;full_length_coverage=2;non_full_length_coverage=0;isoform_length=4122;expected_accuracy=1.000   | 1   | 1388 | 1388 | 2726 | 514  | 190<br>1 | 2784 | 412<br>2 |  |
| cb415_c43/f1p0/3304<br>isoform=cb415_c43;full_length_coverage=1;non_full_length_coverage=0;isoform_length=3304;expected_accuracy=0.992         | gnl BL_ORD_ID 72143 cb415_c84/f1p0/3822                                                                                                                                   | 24  | 2924 | 2922 | 3304 | 88   | 298<br>1 | 3304 | 369<br>8 |  |

|                                                                                                                                                         |                                                                                                                                                                      |     |      |      |      |      |          |      |          |
|---------------------------------------------------------------------------------------------------------------------------------------------------------|----------------------------------------------------------------------------------------------------------------------------------------------------------------------|-----|------|------|------|------|----------|------|----------|
| acy=0.991<br>cb10206_c17/f1p0/1410<br>isoform=cb10206_c17;full_length_coverage=1;non_full_length_coverage=0;isoform_length=1410;expected_accuracy=0.995 | gnl BL_ORD_ID 52307 cb8564_c117746/f1p12/3020                                                                                                                        | 1   | 1001 | 1001 | 1410 | 1365 | 236<br>7 | 2475 | 288<br>7 |
| cb16544_c4/f1p0/1718<br>isoform=cb16544_c4;full_length_coverage=1;non_full_length_coverage=0;isoform_length=1718;expected_accuracy=0.995                | gnl BL_ORD_ID 43096 cb4493_c17/f1p0/3073<br>isoform=cb4493_c17;full_length_coverage=1;non_full_length_coverage=0;isoform_length=3073;expected_accuracy=0.999         | 1   | 1329 | 1325 | 1718 | 92   | 141<br>4 | 2643 | 303<br>7 |
| cb15567_c9/f1p1/1733<br>isoform=cb15567_c9;full_length_coverage=1;non_full_length_coverage=1;isoform_length=1733;expected_accuracy=0.994                | gnl BL_ORD_ID 9735 cb8564_c108152/f2p1/1972<br>isoform=cb8564_c108152;full_length_coverage=2;non_full_length_coverage=1;isoform_length=1972;expected_accuracy=1.000  | 1   | 1626 | 1622 | 1733 | 2    | 162<br>6 | 1739 | 185<br>0 |
| cb8564_c71195/f1p0/3415                                                                                                                                 | gnl BL_ORD_ID 15376 cb8564_c31588/f10p3/3394<br>isoform=cb8564_c31588;full_length_coverage=10;non_full_length_coverage=3;isoform_length=3394;expected_accuracy=1.000 | 1   | 1755 | 1756 | 3373 | 134  | 188<br>8 | 1768 | 338<br>4 |
| cb8516_c0/f3p1/2129<br>isoform=cb8516_c0;full_length_coverage=3;non_full_length_coverage=1;isoform_length=2129;expected_accuracy=0.999                  | gnl BL_ORD_ID 52576 cb8516_c3/f1p0/2479                                                                                                                              | 1   | 1817 | 1817 | 2129 | 20   | 185<br>4 | 1984 | 231<br>2 |
| cb8564_c129787/f1p0/2756                                                                                                                                | gnl BL_ORD_ID 12485 cb8564_c122733/f1p0/3383<br>isoform=cb8564_c122733;full_length_coverage=1;non_full_length_coverage=0;isoform_length=3383;expected_accuracy=0.993 | 154 | 2252 | 1    | 156  | 1289 | 338<br>3 | 120  | 270      |
| cb2229_c69/f3p1/2289                                                                                                                                    | gnl BL_ORD_ID 38403 cb2229_c71/f3p0/3903                                                                                                                             | 1   | 1771 | 1768 | 2289 | 5    | 177      | 3303 | 382      |

|                                                                                                                    |                                                                                                                      |     |      |      |      |      |     |      |     |
|--------------------------------------------------------------------------------------------------------------------|----------------------------------------------------------------------------------------------------------------------|-----|------|------|------|------|-----|------|-----|
| isoform=cb2229_c69;full_length_coverage=3;non_full_length_coverage=1;isoform_length=2289;expected_accuracy=1.000   | isoform=cb2229_c71;full_length_coverage=3;non_full_length_coverage=0;isoform_length=3903;expected_accuracy=1.000     |     |      |      |      |      | 4   |      | 4   |
| cb8564_c71076/f1p2/2391                                                                                            | gnl BL_ORD_ID 56913 cb8564_c76756/f1p1/3429                                                                          | 142 | 2363 | 1    | 142  | 1206 | 342 | 905  | 104 |
|                                                                                                                    | gnl BL_ORD_ID 15169 cb8564_c40218/f1p0/3146                                                                          |     |      |      |      |      | 7   |      | 6   |
| cb8564_c47011/f1p0/3100                                                                                            | isoform=cb8564_c40218;full_length_coverage=1;non_full_length_coverage=0;isoform_length=3146;expected_accuracy=0.993  | 2   | 2306 | 2301 | 2934 | 3    | 228 | 2519 | 314 |
|                                                                                                                    | gnl BL_ORD_ID 28515 cb1462_c7/f1p0/3911                                                                              |     |      |      |      |      | 4   |      | 3   |
| cb1462_c18/f1p0/3693                                                                                               | isoform=cb1462_c7;full_length_coverage=1;non_full_length_coverage=0;isoform_length=3911;expected_accuracy=0.993      | 250 | 3603 | 1    | 250  | 579  | 390 | 53   | 319 |
|                                                                                                                    | gnl BL_ORD_ID 28515 cb1462_c7/f1p0/3911                                                                              |     |      |      |      |      | 7   |      |     |
| cb8564_c51444/f1p0/2956                                                                                            | gnl BL_ORD_ID 57736 cb8564_c79306/f1p0/3361                                                                          | 2   | 2463 | 2458 | 2975 | 1    | 246 | 2562 | 307 |
|                                                                                                                    | gnl BL_ORD_ID 57736 cb8564_c79306/f1p0/3361                                                                          |     |      |      |      |      | 2   |      | 8   |
| cb8564_c129284/f1p0/2118                                                                                           | isoform=cb8564_c129284;full_length_coverage=1;non_full_length_coverage=0;isoform_length=2118;expected_accuracy=0.991 | 1   | 1970 | 1965 | 2118 | 1    | 197 | 2158 | 231 |
|                                                                                                                    | gnl BL_ORD_ID 55471 cb8564_c42491/f1p0/2564                                                                          |     |      |      |      |      | 5   |      | 2   |
| cb12003_c138/f1p0/1068                                                                                             | gnl BL_ORD_ID 42020 cb4768_c19/f1p4/2022                                                                             |     |      |      |      |      |     |      |     |
| isoform=cb12003_c138;full_length_coverage=1;non_full_length_coverage=0;isoform_length=1068;expected_accuracy=1.000 | isoform=cb4768_c19;full_length_coverage=1;non_full_length_coverage=4;isoform_length=2022;expected_accuracy=0.997     | 420 | 1068 | 9    | 424  | 636  | 128 | 1    | 415 |
|                                                                                                                    | gnl BL_ORD_ID 42020 cb4768_c19/f1p4/2022                                                                             |     |      |      |      |      | 5   |      |     |
| cb18456_c2265/f1p0/1523                                                                                            | isoform=cb18456_c2265;full_length_coverage=1;non_full_length_coverage=0;isoform_length=1523;expected_                | 164 | 1523 | 9    | 164  | 1517 | 285 | 2    | 151 |
|                                                                                                                    | gnl BL_ORD_ID 74175 cb5625_c0/f1p0/3054                                                                              |     |      |      |      |      | 5   |      |     |



---

|                          |                                                                                                                                             |                          |     |      |      |      |      |      |      |      |
|--------------------------|---------------------------------------------------------------------------------------------------------------------------------------------|--------------------------|-----|------|------|------|------|------|------|------|
| accuracy=0.997           |                                                                                                                                             |                          |     |      |      |      |      |      |      |      |
| cb7584_c15/f1p0/1293     | gnl BL_ORD_ID 6937<br>isoform=cb7584_c7;full_length_coverage=1;non_full_length_coverage=0;isoform_length=2579;expected_accuracy=0.997       | cb7584_c7/f1p0/2579      | 221 | 1310 | 37   | 225  | 1482 | 2579 | 1    | 190  |
| cb5688_c3/f2p0/1460      | gnl BL_ORD_ID 44795<br>isoform=cb5688_c3;full_length_coverage=2;non_full_length_coverage=0;isoform_length=1460;expected_accuracy=1.000      | cb5688_c9/f3p1/2411      | 124 | 1423 | 1    | 126  | 1112 | 2411 | 113  | 237  |
| cb8564_c40764/f1p0/2563  | gnl BL_ORD_ID 12938<br>isoform=cb8564_c40764;full_length_coverage=1;non_full_length_coverage=0;isoform_length=2563;expected_accuracy=0.997  | cb8564_c181163/f1p1/2936 | 1   | 2166 | 2165 | 2563 | 5    | 2154 | 2363 | 2757 |
| cb8564_c176017/f8p2/2488 | gnl BL_ORD_ID 54500<br>isoform=cb8564_c176017;full_length_coverage=8;non_full_length_coverage=2;isoform_length=2488;expected_accuracy=1.000 | cb8564_c124528/f1p0/4445 | 1   | 1225 | 1225 | 2395 | 1    | 1225 | 3079 | 4249 |
| cb454_c4/f3p0/2268       | gnl BL_ORD_ID 72201<br>isoform=cb454_c4;full_length_coverage=3;non_full_length_coverage=0;isoform_length=2268;expected_accuracy=1.000       | cb454_c19/f1p0/2558      | 221 | 2264 | 1    | 220  | 406  | 2453 | 81   | 300  |
| cb9079_c4/f1p0/1895      | gnl BL_ORD_ID 59491<br>isoform=cb9079_c4;full_length_coverage=1;non_full_length_coverage=0;isoform_length=1895;expected_accuracy=0.997      | cb9079_c2/f1p0/2193      | 292 | 1711 | 5    | 295  | 461  | 1881 | 15   | 305  |
| cb8564_c51223/f1p4/1975  | gnl BL_ORD_ID 14463<br>isoform=cb8564_c51223;full_length_coverage=1;non_full_length_coverage=5;isoform_length=4276;expected_accuracy=0.997  | cb8564_c25154/f1p5/4276  | 207 | 1937 | 21   | 208  | 2415 | 4145 | 2    | 189  |

---

|                          |                                                                                                                                                                                         |    |      |      |      |    |          |      |          |
|--------------------------|-----------------------------------------------------------------------------------------------------------------------------------------------------------------------------------------|----|------|------|------|----|----------|------|----------|
| cb8564_c118011/f1p0/1965 | curacy=0.995<br>gnl BL_ORD_ID 13895      cb8564_c23584/f1p4/2247<br>isoform=cb8564_c23584;full_length_coverage=1;non_full_length_coverage=4;isoform_length=2247;expected_accuracy=0.990 | 1  | 1321 | 1317 | 1964 | 60 | 137<br>7 | 1555 | 220<br>2 |
| cb862_c26/f1p0/2964      | gnl BL_ORD_ID 17904      cb862_c22/f1p0/3314<br>isoform=cb862_c22;full_length_coverage=1;non_full_length_coverage=0;isoform_length=3314;expected_accuracy=0.995                         | 1  | 1527 | 1526 | 2931 | 1  | 152<br>3 | 1914 | 331<br>4 |
| cb8564_c40764/f1p0/2563  | gnl BL_ORD_ID 14529      cb8564_c44074/f1p1/2922<br>isoform=cb8564_c40764;full_length_coverage=1;non_full_length_coverage=0;isoform_length=2563;expected_accuracy=0.997                 | 1  | 2167 | 2162 | 2563 | 1  | 214<br>2 | 2349 | 274<br>3 |
| cb8072_c0/f18p1/2410     | gnl BL_ORD_ID 6594      cb8072_c3/f1p0/2585<br>isoform=cb8072_c0;full_length_coverage=18;non_full_length_coverage=1;isoform_length=2410;expected_accuracy=1.000                         | 1  | 2130 | 2129 | 2407 | 1  | 212<br>8 | 2308 | 258<br>5 |
| cb3665_c20/f1p0/2779     | gnl BL_ORD_ID 71424      cb3665_c5/f1p0/2924                                                                                                                                            | 12 | 1482 | 1479 | 2669 | 1  | 147<br>1 | 1602 | 279<br>2 |
| cb8564_c76007/f1p0/2966  | gnl BL_ORD_ID 17429      cb8564_c85447/f1p0/3196<br>isoform=cb8564_c85447;full_length_coverage=1;non_full_length_coverage=0;isoform_length=3196;expected_accuracy=0.997                 | 12 | 2421 | 2420 | 2946 | 6  | 241<br>3 | 2660 | 319<br>3 |
| cb8564_c84695/f1p1/2710  | gnl BL_ORD_ID 13176      cb8564_c15957/f1p0/2838<br>isoform=cb8564_c84695;full_length_coverage=1;non_full_length_coverage=1;isoform_length=2710;expected_                               | 1  | 1692 | 1691 | 2660 | 1  | 168<br>4 | 1792 | 275<br>6 |

|                                                                                                                                                          |                                                                                                                                                                                         |     |      |      |      |      |          |      |          |
|----------------------------------------------------------------------------------------------------------------------------------------------------------|-----------------------------------------------------------------------------------------------------------------------------------------------------------------------------------------|-----|------|------|------|------|----------|------|----------|
| accuracy=0.998<br>cb5421_c1/f2p0/1551<br>isoform=cb5421_c1;full_length_coverage=2;non_full_length_coverage=0;isoform_length=1551;expected_accuracy=0.996 | curacy=0.994<br>gnl BL_ORD_ID 73402 cb5421_c7/f1p0/2594                                                                                                                                 | 127 | 1523 | 1    | 127  | 1207 | 260<br>4 | 1    | 127      |
| cb5714_c13/f1p0/1198<br>isoform=cb5714_c13;full_length_coverage=1;non_full_length_coverage=0;isoform_length=1198;expected_accuracy=0.996                 | gnl BL_ORD_ID 74326 cb5714_c1/f1p0/3032                                                                                                                                                 | 127 | 1198 | 16   | 129  | 1572 | 264<br>5 | 1    | 113      |
| cb4641_c4/f2p1/2180<br>isoform=cb4641_c4;full_length_coverage=2;non_full_length_coverage=1;isoform_length=2180;expected_accuracy=0.999                   | gnl BL_ORD_ID 42928                      cb4641_c7/f1p1/2278<br>isoform=cb4641_c7;full_length_coverage=1;non_full_length_coverage=1;isoform_length=2278;expected_accuracy=0.995         | 10  | 1173 | 1172 | 2178 | 4    | 1155     | 1267 | 227<br>5 |
| cb4997_c16/f1p0/2058<br>isoform=cb4997_c16;full_length_coverage=1;non_full_length_coverage=0;isoform_length=2058;expected_accuracy=0.996                 | gnl BL_ORD_ID 73169 cb4997_c12/f1p1/2947                                                                                                                                                | 1   | 1406 | 1404 | 1998 | 154  | 155<br>9 | 2281 | 287<br>6 |
| cb8564_c188097/f1p0/2552<br>isoform=cb8564_c188097;full_length_coverage=1;non_full_length_coverage=0;isoform_length=2552;expected_accuracy=0.996         | gnl BL_ORD_ID 55603 cb8564_c46500/f1p1/2752                                                                                                                                             | 1   | 1945 | 1940 | 2552 | 2    | 194<br>2 | 2043 | 265<br>5 |
| cb8564_c18838/f2p0/2444<br>isoform=cb8564_c18838;full_length_coverage=2;non_full_length_coverage=0;isoform_length=2444;expected_accuracy=0.994           | gnl BL_ORD_ID 55156 cb8564_c25661/f1p0/2727                                                                                                                                             | 154 | 2444 | 1    | 154  | 437  | 272<br>7 | 57   | 210      |
| cb8564_c18662/f1p0/2467<br>isoform=cb8564_c18662;full_length_coverage=1;non_full_length_coverage=0;isoform_length=2467;expected_accuracy=0.994           | gnl BL_ORD_ID 10489                      cb8564_c11876/f2p2/3220<br>isoform=cb8564_c11876;full_length_coverage=2;non_full_length_coverage=2;isoform_length=3220;expected_accuracy=0.994 | 1   | 1823 | 1824 | 2464 | 176  | 200<br>1 | 2469 | 3110     |

|                                                                                                                                                |                                                                                                                                                              |     |      |      |      |     |      |      |      |  |
|------------------------------------------------------------------------------------------------------------------------------------------------|--------------------------------------------------------------------------------------------------------------------------------------------------------------|-----|------|------|------|-----|------|------|------|--|
| accuracy=0.997                                                                                                                                 | curacy=0.998                                                                                                                                                 |     |      |      |      |     |      |      |      |  |
| cb18012_c2/f1p0/1829                                                                                                                           | gnl BL_ORD_ID 54874 cb8564_c3238/f1p0/2188                                                                                                                   | 176 | 1762 | 1    | 176  | 507 | 2093 | 34   | 209  |  |
| cb3229_c12/f1p0/2616                                                                                                                           | gnl BL_ORD_ID 39328 cb3229_c23/f1p0/2590<br>isoform=cb3229_c23;full_length_coverage=1;non_full_length_coverage=0;isoform_length=2590;expected_accuracy=0.996 | 444 | 2405 | 5    | 448  | 630 | 2590 | 12   | 466  |  |
| cb5896_c44/f1p0/2069<br>isoform=cb5896_c44;full_length_coverage=1;non_full_length_coverage=0;isoform_length=2069;expected_accuracy=0.991       | gnl BL_ORD_ID 74562 cb5896_c45/f1p0/2541                                                                                                                     | 1   | 1372 | 1371 | 2069 | 16  | 1387 | 1599 | 2297 |  |
| cb7345_c17/f1p0/1467<br>isoform=cb7345_c17;full_length_coverage=1;non_full_length_coverage=0;isoform_length=1467;expected_accuracy=0.990       | gnl BL_ORD_ID 51135 cb7345_c10/f1p2/1653                                                                                                                     | 1   | 1237 | 1235 | 1467 | 59  | 1295 | 1411 | 1643 |  |
| cb8564_c90427/f2p1/2823<br>isoform=cb8564_c90427;full_length_coverage=2;non_full_length_coverage=1;isoform_length=2823;expected_accuracy=0.994 | gnl BL_ORD_ID 57868 cb8564_c82903/f1p0/3274                                                                                                                  | 1   | 1912 | 1914 | 2823 | 1   | 1887 | 1994 | 2902 |  |
| cb307_c6/f1p1/4064<br>isoform=cb307_c6;full_length_coverage=1;non_full_length_coverage=1;isoform_length=4064;expected_accuracy=0.997           | gnl BL_ORD_ID 37483 cb307_c5/f1p1/4350<br>isoform=cb307_c5;full_length_coverage=1;non_full_length_coverage=1;isoform_length=4350;expected_accuracy=0.997     | 1   | 2744 | 2744 | 4064 | 4   | 2729 | 2978 | 4294 |  |
| cb8564_c181853/f1p0/2119<br>isoform=cb8564_c181853;full_length_coverage=1;non_full_length_coverage=0;isoform_length=2119;expected_             | gnl BL_ORD_ID 17100 cb8564_c78503/f1p0/2935<br>isoform=cb8564_c78503;full_length_coverage=1;non_full_length_coverage=0;isoform_length=2935;expected_ac       | 1   | 1339 | 1334 | 2119 | 1   | 1339 | 2137 | 2921 |  |

|                         |                                                                                                                                                                                                  |      |      |      |      |      |     |      |     |  |
|-------------------------|--------------------------------------------------------------------------------------------------------------------------------------------------------------------------------------------------|------|------|------|------|------|-----|------|-----|--|
| accuracy=0.997          | curacy=0.997                                                                                                                                                                                     |      |      |      |      |      |     |      |     |  |
| cb2208_c33/f1p0/3174    | gnl BL_ORD_ID 69620 cb2208_c18/f1p0/3335                                                                                                                                                         | 1    | 2195 | 2193 | 2861 | 58   | 225 | 2486 | 315 |  |
|                         |                                                                                                                                                                                                  |      |      |      |      |      | 2   |      | 4   |  |
| cb4016_c33/f1p0/2507    | gnl BL_ORD_ID 71727 cb4016_c35/f1p0/2920                                                                                                                                                         | 207  | 2462 | 1    | 209  | 468  | 272 | 22   | 210 |  |
|                         |                                                                                                                                                                                                  |      |      |      |      |      | 2   |      |     |  |
| cb1193_c21/f1p1/3672    | gnl BL_ORD_ID 59249 cb1193_c13/f1p1/3683                                                                                                                                                         | 1    | 2033 | 2031 | 3559 | 1    | 203 | 2158 | 368 |  |
|                         |                                                                                                                                                                                                  |      |      |      |      |      | 3   |      | 6   |  |
| cb5013_c16/f1p0/2722    | gnl BL_ORD_ID 42368                      cb5013_c14/f1p0/2747<br>isoform=cb5013_c14;full_length_coverage=1;non_full_l<br>ength_coverage=0;isoform_length=2747;expected_accu<br>racy=0.993        | 231  | 2594 | 12   | 231  | 374  | 273 | 1    | 215 |  |
|                         |                                                                                                                                                                                                  |      |      |      |      |      | 5   |      |     |  |
| cb4674_c83/f1p0/2467    | gnl BL_ORD_ID 43546                      cb4674_c13/f1p0/2776<br>isoform=cb4674_c13;full_length_coverage=1;non_full_l<br>ength_coverage=0;isoform_length=2776;expected_accu<br>racy=0.996        | 1    | 1913 | 1912 | 2438 | 12   | 194 | 2057 | 258 |  |
|                         |                                                                                                                                                                                                  |      |      |      |      |      | 8   |      | 3   |  |
| cb8564_c90478/f1p0/2233 | gnl BL_ORD_ID 13061                      cb8564_c163547/f1p1/2420<br>isoform=cb8564_c90478;full_length_coverage=1;non_f<br>ull_length_coverage=0;isoform_length=2233;expected_<br>accuracy=1.000 | 1064 | 2233 | 1    | 1066 | 1251 | 241 | 16   | 108 |  |
|                         |                                                                                                                                                                                                  |      |      |      |      |      | 9   |      | 5   |  |
| cb8564_c39136/f1p0/3036 | gnl BL_ORD_ID 14539                      cb8564_c46562/f2p3/3196<br>isoform=cb8564_c39136;full_length_coverage=1;non_f<br>ull_length_coverage=0;isoform_length=3036;expected_<br>accuracy=0.998  | 10   | 2089 | 2085 | 3032 | 16   | 212 | 2247 | 319 |  |
|                         |                                                                                                                                                                                                  |      |      |      |      |      | 0   |      | 5   |  |
| cb5643_c124/f5p1/2491   | gnl BL_ORD_ID 74221 cb5643_c68/f1p0/3247<br>isoform=cb5643_c124;full_length_coverage=5;non_full<br>_length_coverage=1;isoform_length=2491;expected_acc                                           | 1131 | 2472 | 100  | 1134 | 1897 | 323 | 1    | 103 |  |
|                         |                                                                                                                                                                                                  |      |      |      |      |      | 8   |      | 5   |  |

|                                                                                                                                                               |                                                                                                                                                                      |      |      |      |      |      |      |      |      |
|---------------------------------------------------------------------------------------------------------------------------------------------------------------|----------------------------------------------------------------------------------------------------------------------------------------------------------------------|------|------|------|------|------|------|------|------|
| uracy=0.997<br>cb8564_c48473/f1p2/2701<br>isoform=cb8564_c48473;full_length_coverage=1;non_full_length_coverage=2;isoform_length=2701;expected_accuracy=0.999 | gnl BL_ORD_ID 56580 cb8564_c47159/f1p0/3238                                                                                                                          | 220  | 2701 | 11   | 225  | 440  | 2920 | 81   | 296  |
| cb7531_c5/f2p1/2362<br>isoform=cb7531_c5;full_length_coverage=2;non_full_length_coverage=1;isoform_length=2362;expected_accuracy=1.000                        | gnl BL_ORD_ID 51316 cb7531_c18/f1p0/2730                                                                                                                             | 573  | 2325 | 6    | 574  | 744  | 2496 | 22   | 590  |
| cb4233_c84/f1p1/2344                                                                                                                                          | gnl BL_ORD_ID 43592 cb4233_c82/f1p1/2791<br>isoform=cb4233_c82;full_length_coverage=1;non_full_length_coverage=1;isoform_length=2791;expected_accuracy=0.993         | 227  | 2389 | 1    | 225  | 527  | 2687 | 503  | 726  |
| cb8564_c110954/f1p1/2392<br>isoform=cb8564_c110954;full_length_coverage=1;non_full_length_coverage=1;isoform_length=2392;expected_accuracy=0.994              | gnl BL_ORD_ID 11994 cb8564_c130264/f1p0/2624<br>isoform=cb8564_c130264;full_length_coverage=1;non_full_length_coverage=0;isoform_length=2624;expected_accuracy=0.995 | 1    | 2113 | 2109 | 2392 | 18   | 2155 | 2323 | 2605 |
| cb4286_c9/f1p1/2064<br>isoform=cb4286_c9;full_length_coverage=1;non_full_length_coverage=1;isoform_length=2064;expected_accuracy=0.993                        | gnl BL_ORD_ID 43994 cb4286_c20/f6p0/2191<br>isoform=cb4286_c20;full_length_coverage=6;non_full_length_coverage=0;isoform_length=2191;expected_accuracy=1.000         | 13   | 1563 | 1562 | 2048 | 1    | 1562 | 1705 | 2191 |
| cb8564_c4643/f1p1/2554                                                                                                                                        | gnl BL_ORD_ID 55045 cb8564_c4649/f1p0/3061                                                                                                                           | 1    | 1705 | 1700 | 2551 | 57   | 1761 | 1894 | 2744 |
| cb8564_c21439/f1p0/2587                                                                                                                                       | gnl BL_ORD_ID 52675 cb8564_c10772/f1p3/2796                                                                                                                          | 1226 | 2572 | 1    | 1228 | 1383 | 2729 | 32   | 1262 |
| cb415_c43/f1p0/3304                                                                                                                                           | gnl BL_ORD_ID 43085 cb415_c15/f3p0/3787                                                                                                                              | 17   | 2924 | 2922 | 3304 | 86   | 298  | 3310 | 369  |

|                                                                                                                                             |                                                                                                                                                                       |      |      |      |      |      |          |      |          |
|---------------------------------------------------------------------------------------------------------------------------------------------|-----------------------------------------------------------------------------------------------------------------------------------------------------------------------|------|------|------|------|------|----------|------|----------|
| isoform=cb415_c43;full_length_coverage=1;non_full_length_coverage=0;isoform_length=3304;expected_accuracy=0.991<br>cb13752_c8/f1p0/1329     | isoform=cb415_c15;full_length_coverage=3;non_full_length_coverage=0;isoform_length=3787;expected_accuracy=0.998<br>gnl BL_ORD_ID 15482          cb8564_c488/f6p0/1932 |      |      |      |      |      | 5        |      | 2        |
| isoform=cb13752_c8;full_length_coverage=1;non_full_length_coverage=0;isoform_length=1329;expected_accuracy=0.993<br>cb8564_c36689/f1p1/2368 | isoform=cb8564_c488;full_length_coverage=6;non_full_length_coverage=0;isoform_length=1932;expected_accuracy=1.000<br>gnl BL_ORD_ID 56601   cb8564_c48153/f1p0/3083    | 433  | 1329 | 7    | 434  | 1039 | 193<br>2 | 44   | 473      |
| isoform=cb8564_c36689;full_length_coverage=1;non_full_length_coverage=1;isoform_length=2368;expected_accuracy=0.991<br>cb1379_c0/f10p0/3693 | gnl BL_ORD_ID 27262          cb1379_c4/f1p0/4351<br>isoform=cb1379_c4;full_length_coverage=1;non_full_length_coverage=0;isoform_length=4351;expected_accuracy=0.999   | 1    | 1709 | 1706 | 2368 | 13   | 171<br>2 | 2211 | 287<br>5 |
| isoform=cb1379_c0;full_length_coverage=10;non_full_length_coverage=0;isoform_length=3693;expected_accuracy=1.000<br>cb5564_c13/f1p0/1988    | gnl BL_ORD_ID 45842          cb5564_c9/f1p0/2154<br>isoform=cb5564_c9;full_length_coverage=1;non_full_length_coverage=0;isoform_length=2154;expected_accuracy=0.992   | 1209 | 3693 | 1    | 1211 | 1805 | 429<br>1 | 28   | 124<br>0 |
| isoform=cb5564_c13;full_length_coverage=1;non_full_length_coverage=0;isoform_length=1988;expected_accuracy=0.995<br>cb8564_c42776/f1p0/2186 | gnl BL_ORD_ID 55276   cb8564_c37079/f1p0/2659<br>gnl BL_ORD_ID 41049          cb3535_c11/f1p1/3518                                                                    | 1    | 1082 | 1083 | 1981 | 21   | 1102     | 1256 | 215<br>4 |
| cb8564_c42776/f1p0/2186                                                                                                                     | gnl BL_ORD_ID 55276   cb8564_c37079/f1p0/2659                                                                                                                         | 508  | 2204 | 6    | 508  | 725  | 242<br>1 | 1    | 504      |
| cb3535_c16/f1p0/3449                                                                                                                        | gnl BL_ORD_ID 41049          cb3535_c11/f1p1/3518<br>isoform=cb3535_c11;full_length_coverage=1;non_full_length_coverage=1;isoform_length=3518;expected_accuracy=1.000 | 11   | 2589 | 2585 | 3416 | 1    | 257<br>9 | 2682 | 351<br>2 |
| cb8564_c45300/f1p4/3014                                                                                                                     | gnl BL_ORD_ID 55243   cb8564_c36242/f1p0/3335                                                                                                                         | 243  | 3014 | 1    | 246  | 401  | 317      | 1    | 244      |

|                                                                                                                     |                     |                         |                                                                                                                  |     |      |      |      |      |      |      |      |
|---------------------------------------------------------------------------------------------------------------------|---------------------|-------------------------|------------------------------------------------------------------------------------------------------------------|-----|------|------|------|------|------|------|------|
| isoform=cb8564_c45300;full_length_coverage=1;non_full_length_coverage=4;isoform_length=3014;expected_accuracy=0.996 |                     |                         |                                                                                                                  |     |      |      |      |      |      | 5    |      |
| cb373_c4/f2p0/3694                                                                                                  | gnl BL_ORD_ID 40699 | cb373_c6/f1p0/4615      | isoform=cb373_c6;full_length_coverage=1;non_full_length_coverage=0;isoform_length=4615;expected_accuracy=0.997   | 201 | 3695 | 1    | 201  | 1118 | 4615 | 87   | 286  |
| cb16130_c1/f2p0/1014                                                                                                | gnl BL_ORD_ID 29529 | cb16130_c3/f1p0/1347    | isoform=cb16130_c3;full_length_coverage=1;non_full_length_coverage=0;isoform_length=1347;expected_accuracy=0.993 | 244 | 1012 | 8    | 243  | 394  | 1157 | 58   | 290  |
| cb4456_c4/f1p0/1832                                                                                                 | gnl BL_ORD_ID 43644 | cb4456_c0/f1p0/3343     | isoform=cb4456_c0;full_length_coverage=1;non_full_length_coverage=0;isoform_length=3343;expected_accuracy=0.996  | 418 | 1830 | 50   | 423  | 1929 | 3341 | 1    | 360  |
| cb17535_c10/f1p0/1710                                                                                               | gnl BL_ORD_ID 4407  | cb7016_c6/f1p0/1894     | isoform=cb7016_c6;full_length_coverage=1;non_full_length_coverage=0;isoform_length=1894;expected_accuracy=1.000  | 1   | 1127 | 1128 | 1688 | 1    | 1127 | 1337 | 1894 |
| cb2739_c7/f1p0/3065                                                                                                 | gnl BL_ORD_ID 38774 | cb2739_c1/f2p0/3546     | isoform=cb2739_c1;full_length_coverage=2;non_full_length_coverage=0;isoform_length=3546;expected_accuracy=0.996  | 1   | 1801 | 1800 | 2872 | 430  | 2228 | 2453 | 3526 |
| cb8564_c113599/f1p0/2144                                                                                            | gnl BL_ORD_ID 58043 | cb8564_c87344/f1p0/2474 |                                                                                                                  | 1   | 1347 | 1346 | 2125 | 44   | 1389 | 1567 | 2345 |
| cb8455_c9/f1p0/2404                                                                                                 | gnl BL_ORD_ID 9508  | cb8455_c0/f5p0/2372     |                                                                                                                  | 655 | 2220 | 89   | 654  | 775  | 234  | 66   | 630  |



|                          |                                                                                                                      |                                             |      |      |      |      |      |          |      |          |
|--------------------------|----------------------------------------------------------------------------------------------------------------------|---------------------------------------------|------|------|------|------|------|----------|------|----------|
|                          | isoform=cb8455_c0;full_length_coverage=5;non_full_length_coverage=0;isoform_length=2372;expected_accuracy=1.000      |                                             |      |      |      |      |      | 0        |      |          |
| cb8564_c180679/f1p0/2109 | isoform=cb8564_c180679;full_length_coverage=1;non_full_length_coverage=0;isoform_length=2109;expected_accuracy=0.999 | gnl BL_ORD_ID 54765 cb8564_c2442/f1p1/2806  | 198  | 2109 | 1    | 202  | 581  | 249<br>2 | 2    | 203      |
| cb12336_c11/f1p0/1558    |                                                                                                                      | gnl BL_ORD_ID 58847 cb9677_c8/f1p0/2271     | 368  | 1460 | 8    | 371  | 1126 | 222<br>1 | 21   | 384      |
| cb6143_c2/f2p0/2755      | isoform=cb6143_c2;full_length_coverage=2;non_full_length_coverage=0;isoform_length=2755;expected_accuracy=0.998      | gnl BL_ORD_ID 45275 cb6143_c4/f1p1/2929     |      |      |      |      |      |          |      |          |
| cb2215_c11/f1p1/2465     | isoform=cb2215_c11;full_length_coverage=1;non_full_length_coverage=1;isoform_length=2465;expected_accuracy=0.997     | gnl BL_ORD_ID 38573 cb2215_c5/f1p0/4352     | 1249 | 2752 | 1    | 1250 | 1425 | 292<br>9 | 57   | 130<br>5 |
| cb1317_c3/f5p1/2427      | isoform=cb1317_c3;full_length_coverage=5;non_full_length_coverage=1;isoform_length=2427;expected_accuracy=1.000      | gnl BL_ORD_ID 27409 cb1317_c11/f1p1/4136    | 1    | 1442 | 1442 | 2447 | 1303 | 274<br>4 | 3336 | 435<br>2 |
| cb8564_c186356/f1p0/2744 | isoform=cb8564_c186356;full_length_coverage=1;non_full_length_coverage=0;isoform_length=2744;expected_accuracy=0.998 | gnl BL_ORD_ID 55873 cb8564_c47701/f1p0/3144 | 182  | 2371 | 16   | 181  | 1953 | 413<br>6 | 69   | 228      |
| cb8564_c50128/f1p0/4343  |                                                                                                                      | gnl BL_ORD_ID 14314 cb8564_c45827/f2p2/4435 | 12   | 1396 | 1393 | 2744 | 24   | 140<br>6 | 1526 | 287<br>7 |
|                          |                                                                                                                      |                                             | 29   | 3278 | 3274 | 4077 | 1    | 325      | 3520 | 432      |

|                                                                                                                      |                                                                                                                     |     |      |      |      |      |     |   |      |      |
|----------------------------------------------------------------------------------------------------------------------|---------------------------------------------------------------------------------------------------------------------|-----|------|------|------|------|-----|---|------|------|
|                                                                                                                      | isoform=cb8564_c45827;full_length_coverage=2;non_full_length_coverage=2;isoform_length=4435;expected_accuracy=0.999 |     |      |      |      |      |     | 5 |      | 3    |
| cb6802_c46/f1p0/2539                                                                                                 | gnl BL_ORD_ID 4195                      cb6802_c5/f2p0/2683                                                         |     |      |      |      |      |     |   |      |      |
| isoform=cb6802_c46;full_length_coverage=1;non_full_length_coverage=0;isoform_length=2539;expected_accuracy=0.991     | isoform=cb6802_c5;full_length_coverage=2;non_full_length_coverage=0;isoform_length=2683;expected_accuracy=0.998     | 205 | 2539 | 10   | 206  | 343  | 267 | 0 | 1    | 218  |
| cb8564_c89788/f1p0/3521                                                                                              | gnl BL_ORD_ID 56953      cb8564_c78479/f1p0/3692                                                                    | 12  | 2063 | 2061 | 3367 | 2    | 205 | 2 | 2162 | 346  |
| cb5523_c3/f1p0/2036                                                                                                  |                                                                                                                     |     |      |      |      |      |     |   |      |      |
| isoform=cb5523_c3;full_length_coverage=1;non_full_length_coverage=0;isoform_length=2036;expected_accuracy=0.997      | gnl BL_ORD_ID 73421      cb5523_c1/f1p0/3096                                                                        | 16  | 1720 | 1719 | 2036 | 8    | 171 | 2 | 2237 | 256  |
| cb8564_c162907/f1p0/2069                                                                                             |                                                                                                                     |     |      |      |      |      |     |   |      |      |
| isoform=cb8564_c162907;full_length_coverage=1;non_full_length_coverage=0;isoform_length=2069;expected_accuracy=0.993 | gnl BL_ORD_ID 52763      cb8564_c13243/f1p0/4432                                                                    | 261 | 2057 | 68   | 259  | 2443 | 423 | 5 | 2    | 191  |
| cb16569_c16/f1p0/1481                                                                                                |                                                                                                                     |     |      |      |      |      |     |   |      |      |
| isoform=cb16569_c16;full_length_coverage=1;non_full_length_coverage=0;isoform_length=1481;expected_accuracy=0.999    | gnl BL_ORD_ID 59373      cb8916_c10/f1p0/2236                                                                       | 612 | 1481 | 9    | 608  | 833  | 170 | 2 | 17   | 617  |
| cb910_c31/f1p1/2978                                                                                                  | gnl BL_ORD_ID 21606                      cb910_c32/f1p1/3242                                                        |     |      |      |      |      |     |   |      |      |
| isoform=cb910_c31;full_length_coverage=1;non_full_length_coverage=1;isoform_length=2978;expected_accuracy=0.997      | isoform=cb910_c32;full_length_coverage=1;non_full_length_coverage=1;isoform_length=3242;expected_accuracy=0.998     | 2   | 2085 | 2081 | 2978 | 1    | 208 | 5 | 2217 | 3114 |
| cb4006_c13/f1p0/2983                                                                                                 | gnl BL_ORD_ID 39614                      cb4006_c6/f2p3/3293                                                        | 274 | 2983 | 1    | 276  | 508  | 321 |   | 29   | 304  |

|                                                                                                                                        |                                                                                                                                                                                         |     |      |      |      |      |      |      |      |  |
|----------------------------------------------------------------------------------------------------------------------------------------|-----------------------------------------------------------------------------------------------------------------------------------------------------------------------------------------|-----|------|------|------|------|------|------|------|--|
| isoform=cb4006_c13;full_length_coverage=1;non_full_length_coverage=0;isoform_length=2983;expected_accuracy=0.994                       | isoform=cb4006_c6;full_length_coverage=2;non_full_length_coverage=3;isoform_length=3293;expected_accuracy=1.000                                                                         |     |      |      |      |      |      |      | 2    |  |
| cb4403_c2/f1p0/1938                                                                                                                    | gnl BL_ORD_ID 44241                      cb4403_c0/f4p0/1959<br>isoform=cb4403_c0;full_length_coverage=4;non_full_length_coverage=0;isoform_length=1959;expected_accuracy=1.000         | 1   | 1185 | 1186 | 1829 | 2    | 1183 | 1316 | 1959 |  |
| cb947_c27/f1p1/2208                                                                                                                    | gnl BL_ORD_ID 21933                      cb947_c14/f1p0/4429<br>isoform=cb947_c14;full_length_coverage=1;non_full_length_coverage=0;isoform_length=4429;expected_accuracy=0.998         | 1   | 1300 | 1296 | 2091 | 10   | 1309 | 3575 | 4370 |  |
| cb8564_c38233/f1p0/2780                                                                                                                | gnl BL_ORD_ID 58067   cb8564_c87983/f1p0/3569                                                                                                                                           | 1   | 1857 | 1856 | 2785 | 335  | 2191 | 2316 | 3244 |  |
| cb8564_c44621/f1p1/3432                                                                                                                | gnl BL_ORD_ID 14377                      cb8564_c36097/f1p2/3430<br>isoform=cb8564_c36097;full_length_coverage=1;non_full_length_coverage=2;isoform_length=3430;expected_accuracy=0.996 | 105 | 1947 | 1947 | 3335 | 3    | 1865 | 1995 | 3379 |  |
| cb7521_c46/f1p0/2168                                                                                                                   | gnl BL_ORD_ID 51305   cb7521_c32/f1p0/2623                                                                                                                                              | 1   | 1630 | 1626 | 2041 | 231  | 1860 | 2061 | 2476 |  |
| cb3848_c4/f2p0/2376<br>isoform=cb3848_c4;full_length_coverage=2;non_full_length_coverage=0;isoform_length=2376;expected_accuracy=0.995 | gnl BL_ORD_ID 40471                      cb3848_c18/f1p1/3165<br>isoform=cb3848_c18;full_length_coverage=1;non_full_length_coverage=1;isoform_length=3165;expected_accuracy=0.996       | 1   | 2051 | 2049 | 2376 | 2    | 2035 | 2763 | 3093 |  |
| cb13565_c43/f1p0/1770                                                                                                                  | gnl BL_ORD_ID 49739   cb6452_c8/f1p4/2559                                                                                                                                               | 446 | 1629 | 51   | 445  | 1263 | 2443 | 38   | 431  |  |
| cb8564_c115640/f1p0/2569                                                                                                               | gnl BL_ORD_ID 15184                      cb8564_c4258/f1p0/2766                                                                                                                         | 1   | 1409 | 1407 | 2569 | 11   | 141  | 1519 | 268  |  |

|                                                                                                                                              |                                                                                                                                                                           |      |      |      |      |      |          |      |          |
|----------------------------------------------------------------------------------------------------------------------------------------------|---------------------------------------------------------------------------------------------------------------------------------------------------------------------------|------|------|------|------|------|----------|------|----------|
| isoform=cb8564_c115640;full_length_coverage=1;non_full_length_coverage=0;isoform_length=2569;expected_accuracy=0.995                         | isoform=cb8564_c4258;full_length_coverage=1;non_full_length_coverage=0;isoform_length=2766;expected_accuracy=0.994                                                        |      |      |      |      |      | 9        |      | 0        |
| cb8564_c81238/f1p0/2739                                                                                                                      | gnl BL_ORD_ID 12122      cb8564_c152265/f2p1/2512<br>isoform=cb8564_c152265;full_length_coverage=2;non_full_length_coverage=1;isoform_length=2512;expected_accuracy=0.996 | 309  | 2510 | 7    | 307  | 223  | 244<br>0 | 43   | 343      |
| cb8564_c35300/f1p2/3912                                                                                                                      | gnl BL_ORD_ID 55207      cb8564_c35399/f1p0/4553                                                                                                                          | 185  | 3922 | 11   | 187  | 538  | 427<br>6 | 11   | 180      |
| cb12038_c26/f2p3/1762<br>isoform=cb12038_c26;full_length_coverage=2;non_full_length_coverage=3;isoform_length=1762;expected_accuracy=1.000   | gnl BL_ORD_ID 18863      cb8564_c82439/f1p4/3856<br>isoform=cb8564_c82439;full_length_coverage=1;non_full_length_coverage=4;isoform_length=3856;expected_accuracy=0.997   | 268  | 1762 | 57   | 270  | 2343 | 383<br>4 | 43   | 276      |
| cb8564_c48192/f1p6/3029                                                                                                                      | gnl BL_ORD_ID 16705      cb8564_c53880/f1p0/3484<br>isoform=cb8564_c53880;full_length_coverage=1;non_full_length_coverage=0;isoform_length=3484;expected_accuracy=0.996   | 1058 | 2871 | 1    | 1059 | 1672 | 348<br>4 | 1    | 105<br>6 |
| cb8564_c6125/f1p3/2690<br>isoform=cb8564_c6125;full_length_coverage=1;non_full_length_coverage=3;isoform_length=2690;expected_accuracy=0.996 | gnl BL_ORD_ID 14097      cb8564_c3797/f2p1/2809<br>isoform=cb8564_c3797;full_length_coverage=2;non_full_length_coverage=1;isoform_length=2809;expected_accuracy=0.996     | 1    | 2394 | 2394 | 2662 | 5    | 239<br>5 | 2541 | 280<br>9 |
| cb12189_c14/f1p1/1379<br>isoform=cb12189_c14;full_length_coverage=1;non_full_length_coverage=1;isoform_length=1379;expected_accuracy=1.000   | gnl BL_ORD_ID 71985      cb4719_c15/f1p4/2908                                                                                                                             | 291  | 1361 | 31   | 291  | 1856 | 292<br>5 | 1455 | 171<br>4 |
| cb15591_c1/f1p1/1413                                                                                                                         | gnl BL_ORD_ID 59643      cb9317_c9/f1p1/1734                                                                                                                              | 280  | 1413 | 4    | 284  | 542  | 167      | 1    | 281      |

|                                                                                                                                          |                                                                                                                                                                                  |     |      |      |      |     |      |      |      |  |  |
|------------------------------------------------------------------------------------------------------------------------------------------|----------------------------------------------------------------------------------------------------------------------------------------------------------------------------------|-----|------|------|------|-----|------|------|------|--|--|
| isoform=cb15591_c1;full_length_coverage=1;non_full_length_coverage=1;isoform_length=1413;expected_accuracy=0.999<br>cb1245_c3/flp0/3928  |                                                                                                                                                                                  |     |      |      |      |     |      |      | 5    |  |  |
| isoform=cb1245_c3;full_length_coverage=1;non_full_length_coverage=0;isoform_length=3928;expected_accuracy=0.997<br>cb13131_c34/flp1/1713 | gnl BL_ORD_ID 59306 cb1245_c4/flp0/4425                                                                                                                                          | 1   | 2779 | 2775 | 3928 | 20  | 2798 | 2941 | 4094 |  |  |
| isoform=cb13131_c34;full_length_coverage=1;non_full_length_coverage=1;isoform_length=1713;expected_accuracy=0.997<br>cb750_c29/flp0/3123 | gnl BL_ORD_ID 59771 cb9513_c46/flp2/3668                                                                                                                                         | 1   | 1292 | 1294 | 1713 | 5   | 1297 | 1401 | 1837 |  |  |
| isoform=cb750_c29;full_length_coverage=1;non_full_length_coverage=0;isoform_length=3123;expected_accuracy=0.995<br>cb8478_c39/flp0/3267  | gnl BL_ORD_ID 50949 cb750_c23/flp0/3659                                                                                                                                          | 1   | 2339 | 2338 | 3123 | 57  | 2399 | 2767 | 3551 |  |  |
| isoform=cb8478_c39;full_length_coverage=1;non_full_length_coverage=0;isoform_length=3267;expected_accuracy=1.000<br>cb6406_c37/flp0/3004 | gnl BL_ORD_ID 9996                      cb8478_c24/flp0/3383<br>isoform=cb8478_c24;full_length_coverage=1;non_full_length_coverage=0;isoform_length=3383;expected_accuracy=0.996 | 2   | 2959 | 2959 | 3219 | 44  | 2999 | 3125 | 3383 |  |  |
| isoform=cb6406_c37;full_length_coverage=1;non_full_length_coverage=0;isoform_length=3004;expected_accuracy=0.992<br>cb313_c5/f2p0/2828   | gnl BL_ORD_ID 5639                      cb6406_c38/flp0/3157<br>isoform=cb6406_c38;full_length_coverage=1;non_full_length_coverage=0;isoform_length=3157;expected_accuracy=0.998 | 297 | 2997 | 1    | 298  | 450 | 3155 | 10   | 308  |  |  |
| isoform=cb313_c5;full_length_coverage=2;non_full_length_coverage=0;isoform_length=2828;expected_accuracy=0.999                           | gnl BL_ORD_ID 68193 cb313_c25/flp0/3123                                                                                                                                          | 1   | 2547 | 2545 | 2828 | 4   | 2550 | 2679 | 2962 |  |  |

|                                                                                                                      |                                                                                                                      |                          |     |      |      |      |      |      |      |      |
|----------------------------------------------------------------------------------------------------------------------|----------------------------------------------------------------------------------------------------------------------|--------------------------|-----|------|------|------|------|------|------|------|
| y=0.997                                                                                                              |                                                                                                                      |                          |     |      |      |      |      |      |      |      |
| cb8586_c12/fl1p3/1403                                                                                                | gnl BL_ORD_ID 17411                                                                                                  | cb8586_c5/fl1p1/2288     |     |      |      |      |      |      |      |      |
| isoform=cb8586_c12;full_length_coverage=11;non_full_length_coverage=3;isoform_length=1403;expected_accuracy=1.000    | isoform=cb8586_c5;full_length_coverage=1;non_full_length_coverage=1;isoform_length=2288;expected_accuracy=0.994      |                          | 1   | 1112 | 1109 | 1364 | 1    | 1118 | 2033 | 2288 |
| cb8564_c185920/flp0/2777                                                                                             | gnl BL_ORD_ID 9418                                                                                                   | cb8564_c119193/flp2/2975 |     |      |      |      |      |      |      |      |
| isoform=cb8564_c185920;full_length_coverage=1;non_full_length_coverage=0;isoform_length=2777;expected_accuracy=0.996 | isoform=cb8564_c119193;full_length_coverage=1;non_full_length_coverage=2;isoform_length=2975;expected_accuracy=0.998 |                          | 174 | 2773 | 1    | 177  | 353  | 2975 | 15   | 193  |
| cb8564_c37361/flp0/3076                                                                                              | gnl BL_ORD_ID 15169                                                                                                  | cb8564_c40218/flp0/3146  |     |      |      |      |      |      |      |      |
|                                                                                                                      | isoform=cb8564_c40218;full_length_coverage=1;non_full_length_coverage=0;isoform_length=3146;expected_accuracy=0.993  |                          | 1   | 2481 | 2477 | 3066 | 4    | 2466 | 2566 | 3146 |
| cb8564_c71904/flp1/2820                                                                                              | gnl BL_ORD_ID 16025                                                                                                  | cb8564_c69594/f2p2/3247  |     |      |      |      |      |      |      |      |
| isoform=cb8564_c71904;full_length_coverage=1;non_full_length_coverage=1;isoform_length=2820;expected_accuracy=0.996  | isoform=cb8564_c69594;full_length_coverage=2;non_full_length_coverage=2;isoform_length=3247;expected_accuracy=1.000  |                          | 1   | 1983 | 1978 | 2768 | 292  | 2267 | 2456 | 3247 |
| cb4374_c2/flp0/2590                                                                                                  |                                                                                                                      |                          |     |      |      |      |      |      |      |      |
| isoform=cb4374_c2;full_length_coverage=1;non_full_length_coverage=0;isoform_length=2590;expected_accuracy=0.994      | gnl BL_ORD_ID 72517                                                                                                  | cb4374_c5/flp0/2755      | 1   | 2014 | 2011 | 2539 | 15   | 1990 | 2230 | 2762 |
| cb6835_c19/flp0/2028                                                                                                 | gnl BL_ORD_ID 4332                                                                                                   | cb6835_c11/flp2/2231     |     |      |      |      |      |      |      |      |
|                                                                                                                      | isoform=cb6835_c11;full_length_coverage=1;non_full_length_coverage=2;isoform_length=2231;expected_accuracy=0.998     |                          | 673 | 1860 | 72   | 676  | 1029 | 2216 | 106  | 711  |
| cb6511_c0/flp0/2835                                                                                                  | gnl BL_ORD_ID 49789                                                                                                  | cb6511_c1/flp0/3675      |     |      |      |      |      |      |      |      |
|                                                                                                                      |                                                                                                                      |                          | 109 | 2835 | 1    | 114  | 817  | 354  | 1    | 111  |



|                                                                                                                     |                                                                                                                      |     |      |      |      |      |      |      |     |   |
|---------------------------------------------------------------------------------------------------------------------|----------------------------------------------------------------------------------------------------------------------|-----|------|------|------|------|------|------|-----|---|
| accuracy=0.993                                                                                                      |                                                                                                                      |     |      |      |      |      |      |      |     |   |
| cb8564_c36688/f1p0/3356                                                                                             | gnl BL_ORD_ID 55195 cb8564_c35170/f1p0/3386                                                                          | 500 | 3162 | 6    | 499  | 738  | 339  | 4    | 497 |   |
| cb8564_c80488/f1p0/2745                                                                                             | gnl BL_ORD_ID 11179 cb8564_c11761/f4p0/2940                                                                          |     |      |      |      |      |      |      |     |   |
| isoform=cb8564_c80488;full_length_coverage=1;non_full_length_coverage=0;isoform_length=2745;expected_accuracy=0.993 | isoform=cb8564_c11761;full_length_coverage=4;non_full_length_coverage=0;isoform_length=2940;expected_accuracy=0.996  | 11  | 1821 | 1817 | 2687 | 8    | 180  | 2043 | 290 | 3 |
| cb6802_c57/f1p0/2631                                                                                                | gnl BL_ORD_ID 50085 cb6802_c53/f1p0/3720                                                                             | 191 | 2236 | 1    | 193  | 1377 | 342  | 3    | 195 |   |
| cb8564_c88629/f1p0/3306                                                                                             | gnl BL_ORD_ID 11814 cb8564_c155627/f1p2/3483                                                                         |     |      |      |      |      |      |      |     |   |
| isoform=cb8564_c88629;full_length_coverage=1;non_full_length_coverage=0;isoform_length=3306;expected_accuracy=0.999 | isoform=cb8564_c155627;full_length_coverage=1;non_full_length_coverage=2;isoform_length=3483;expected_accuracy=0.998 | 1   | 3122 | 3122 | 3306 | 8    | 3119 | 3300 | 348 | 3 |
| cb8942_c20/f1p0/2709                                                                                                | gnl BL_ORD_ID 19916 cb8942_c15/f1p2/2976                                                                             |     |      |      |      |      |      |      |     |   |
|                                                                                                                     | isoform=cb8942_c15;full_length_coverage=1;non_full_length_coverage=2;isoform_length=2976;expected_accuracy=0.999     | 219 | 2678 | 1    | 224  | 383  | 284  | 1    | 225 |   |
| cb8564_c113232/f1p0/3087                                                                                            | gnl BL_ORD_ID 9995 cb8564_c111409/f2p0/3661                                                                          |     |      |      |      |      |      |      |     |   |
|                                                                                                                     | isoform=cb8564_c111409;full_length_coverage=2;non_full_length_coverage=0;isoform_length=3661;expected_accuracy=0.999 | 2   | 2841 | 2839 | 2997 | 3    | 286  | 3093 | 325 | 1 |
| cb4023_c5/f1p1/3111                                                                                                 | gnl BL_ORD_ID 39792 cb4023_c6/f1p1/3725                                                                              |     |      |      |      |      |      |      |     |   |
| isoform=cb4023_c5;full_length_coverage=1;non_full_length_coverage=1;isoform_length=3111;expected_accuracy=0.994     | isoform=cb4023_c6;full_length_coverage=1;non_full_length_coverage=1;isoform_length=3725;expected_accuracy=0.993      | 207 | 3111 | 1    | 207  | 839  | 372  | 175  | 380 | 4 |
| cb6063_c19/f1p1/2514                                                                                                | gnl BL_ORD_ID 74844 cb6063_c11/f1p1/3128                                                                             | 157 | 2327 | 1    | 156  | 699  | 286  | 42   | 196 |   |



|                                                                                                                                                |                                                                                                                                                              |     |      |      |      |      |               |      |          |
|------------------------------------------------------------------------------------------------------------------------------------------------|--------------------------------------------------------------------------------------------------------------------------------------------------------------|-----|------|------|------|------|---------------|------|----------|
| cb8564_c89122/f1p0/3335                                                                                                                        | gnl BL_ORD_ID 55844 cb8564_c44552/f1p0/3216                                                                                                                  | 110 | 1965 | 1961 | 2915 | 68   | 6<br>193<br>0 | 2068 | 302<br>2 |
| cb322_c35/f1p0/3437<br>isoform=cb322_c35;full_length_coverage=1;non_full_length_coverage=0;isoform_length=3437;expected_accuracy=0.997         | gnl BL_ORD_ID 40333 cb322_c18/f1p0/4294<br>isoform=cb322_c18;full_length_coverage=1;non_full_length_coverage=0;isoform_length=4294;expected_accuracy=0.994   | 114 | 3437 | 1    | 119  | 389  | 370<br>7      | 4    | 129      |
| cb8564_c36056/f1p0/2652<br>isoform=cb8564_c36056;full_length_coverage=1;non_full_length_coverage=0;isoform_length=2652;expected_accuracy=0.999 | gnl BL_ORD_ID 61972 cb12931_c30/f1p0/5903                                                                                                                    | 248 | 2652 | 1    | 251  | 464  | 286<br>9      | 70   | 320      |
| cb8564_c15844/f1p3/3061<br>isoform=cb8564_c15844;full_length_coverage=1;non_full_length_coverage=3;isoform_length=3061;expected_accuracy=0.995 | gnl BL_ORD_ID 53642 cb8564_c141128/f1p1/3401                                                                                                                 | 1   | 2692 | 2688 | 3061 | 32   | 272<br>0      | 2894 | 326<br>3 |
| cb1371_c15/f1p2/3990<br>isoform=cb1371_c15;full_length_coverage=1;non_full_length_coverage=2;isoform_length=3990;expected_accuracy=0.993       | gnl BL_ORD_ID 25357 cb1371_c47/f1p1/5280<br>isoform=cb1371_c47;full_length_coverage=1;non_full_length_coverage=1;isoform_length=5280;expected_accuracy=0.998 | 380 | 3924 | 1    | 385  | 1725 | 528<br>0      | 9    | 393      |
| cb2324_c35/f1p1/3632<br>isoform=cb2324_c35;full_length_coverage=1;non_full_length_coverage=1;isoform_length=3632;expected_accuracy=0.996       | gnl BL_ORD_ID 68434 cb2324_c22/f1p0/3794                                                                                                                     | 205 | 3607 | 1    | 210  | 354  | 375<br>1      | 1    | 206      |
| cb1512_c15/f1p1/3322                                                                                                                           | gnl BL_ORD_ID 28156 cb1512_c10/f1p1/4211<br>isoform=cb1512_c10;full_length_coverage=1;non_full_length_coverage=1;isoform_length=4211;expected_accuracy=0.999 | 1   | 1681 | 1681 | 3228 | 138  | 180<br>9      | 2668 | 4211     |

|                                                                                                                                              |                                                                                                                                                              |      |      |      |      |      |          |      |          |  |
|----------------------------------------------------------------------------------------------------------------------------------------------|--------------------------------------------------------------------------------------------------------------------------------------------------------------|------|------|------|------|------|----------|------|----------|--|
|                                                                                                                                              | acy=0.991                                                                                                                                                    |      |      |      |      |      |          |      |          |  |
| cb4007_c32/f1p2/2576                                                                                                                         | gnl BL_ORD_ID 70713 cb4007_c23/f1p0/3263                                                                                                                     | 1    | 1627 | 1626 | 2466 | 203  | 182<br>8 | 2373 | 321<br>4 |  |
| cb6391_c2/f2p0/2236<br>isoform=cb6391_c2;full_length_coverage=2;non_full_length_coverage=0;isoform_length=2236;expected_accuracy=0.998       | gnl BL_ORD_ID 3496 cb6391_c13/f1p0/2480<br>isoform=cb6391_c13;full_length_coverage=1;non_full_length_coverage=0;isoform_length=2480;expected_accuracy=0.999  | 225  | 2236 | 93   | 227  | 467  | 247<br>8 | 4    | 138      |  |
| cb8393_c4/f1p0/1595<br>isoform=cb8393_c4;full_length_coverage=1;non_full_length_coverage=0;isoform_length=1595;expected_accuracy=0.999       | gnl BL_ORD_ID 9724 cb8393_c0/f1p0/2381<br>isoform=cb8393_c0;full_length_coverage=1;non_full_length_coverage=0;isoform_length=2381;expected_accuracy=1.000    | 205  | 1590 | 21   | 206  | 996  | 238<br>1 | 15   | 194      |  |
| cb6000_c52/f40p0/2861<br>isoform=cb6000_c52;full_length_coverage=40;non_full_length_coverage=0;isoform_length=2861;expected_accuracy=1.000   | gnl BL_ORD_ID 74753 cb6000_c20/f1p0/3241                                                                                                                     | 541  | 2846 | 91   | 543  | 933  | 323<br>7 | 1    | 447      |  |
| cb8564_c5118/f1p1/4889<br>isoform=cb8564_c5118;full_length_coverage=1;non_full_length_coverage=1;isoform_length=4889;expected_accuracy=0.991 | gnl BL_ORD_ID 30140 cb14859_c6/f1p4/5345<br>isoform=cb14859_c6;full_length_coverage=1;non_full_length_coverage=4;isoform_length=5345;expected_accuracy=0.999 | 1398 | 4854 | 1    | 1401 | 1837 | 531<br>5 | 1    | 140<br>9 |  |
| cb13415_c1/f2p0/1813<br>isoform=cb13415_c1;full_length_coverage=2;non_full_length_coverage=0;isoform_length=1813;expected_accuracy=0.998     | gnl BL_ORD_ID 44844 cb5659_c28/f2p0/1973<br>isoform=cb5659_c28;full_length_coverage=2;non_full_length_coverage=0;isoform_length=1973;expected_accuracy=0.996 | 235  | 1813 | 67   | 237  | 388  | 196<br>4 | 1    | 171      |  |
| cb8564_c181853/f1p0/2119<br>isoform=cb8564_c181853;full_length_coverage=1;non_full_length_coverage=0;isoform_length=2119;expected_           | gnl BL_ORD_ID 13976 cb8564_c43401/f1p2/3025<br>isoform=cb8564_c43401;full_length_coverage=1;non_full_length_coverage=2;isoform_length=3025;expected_ac       | 1    | 1339 | 1334 | 2119 | 1    | 139<br>1 | 2230 | 302<br>5 |  |

|                          |                                                                                                                                                                         |      |      |      |      |      |          |      |          |  |
|--------------------------|-------------------------------------------------------------------------------------------------------------------------------------------------------------------------|------|------|------|------|------|----------|------|----------|--|
| accuracy=0.997           | curacy=0.995                                                                                                                                                            |      |      |      |      |      |          |      |          |  |
| cb4684_c3/flp0/3284      | gnl BL_ORD_ID 41678      cb4684_c5/flp0/3247<br>isoform=cb4684_c5;full_length_coverage=1;non_full_length_coverage=0;isoform_length=3247;expected_accuracy=0.997         | 1443 | 2997 | 1    | 1445 | 1694 | 324<br>7 | 90   | 153<br>4 |  |
| cb18064_c0/flp0/1618     | gnl BL_ORD_ID 9171      cb8564_c119467/flp0/2716<br>isoform=cb18064_c0;full_length_coverage=1;non_full_length_coverage=0;isoform_length=1618;expected_accuracy=0.993    | 1    | 1034 | 1033 | 1618 | 23   | 105<br>7 | 1900 | 248<br>5 |  |
| cb1049_c13/flp0/3054     | gnl BL_ORD_ID 47283      cb1049_c16/flp0/3709                                                                                                                           | 10   | 1596 | 1593 | 3032 | 28   | 1611     | 1718 | 316<br>2 |  |
| cb649_c18/flp1/3876      | gnl BL_ORD_ID 5275      cb649_c14/flp2/4095<br>isoform=cb649_c14;full_length_coverage=1;non_full_length_coverage=2;isoform_length=4095;expected_accuracy=0.995          | 265  | 3847 | 1    | 265  | 404  | 400<br>0 | 26   | 289      |  |
| cb1770_c20/flp1/3435     | gnl BL_ORD_ID 33845      cb1770_c3/f3p0/3565<br>isoform=cb1770_c3;full_length_coverage=3;non_full_length_coverage=0;isoform_length=3565;expected_accuracy=0.999         | 18   | 1944 | 1942 | 3403 | 1    | 193<br>1 | 2096 | 356<br>5 |  |
| cb8564_c51244/flp0/2997  | gnl BL_ORD_ID 55929      cb8564_c49294/flp0/4356                                                                                                                        | 1    | 2130 | 2130 | 2967 | 16   | 214<br>5 | 2758 | 359<br>5 |  |
| cb8564_c53418/flp0/2602  | gnl BL_ORD_ID 11316      cb8564_c12355/flp9/2685<br>isoform=cb8564_c53418;full_length_coverage=1;non_full_length_coverage=0;isoform_length=2602;expected_accuracy=0.991 | 1163 | 2548 | 1    | 1168 | 1297 | 268<br>5 | 1    | 1196     |  |
| cb8564_c113842/flp0/1982 | gnl BL_ORD_ID 9467      cb8564_c109054/f5p0/2034                                                                                                                        | 216  | 1960 | 3    | 215  | 314  | 203      | 1    | 206      |  |

|                                                                                                                                               |                                                                                                                      |     |      |      |      |      |      |      |      |   |
|-----------------------------------------------------------------------------------------------------------------------------------------------|----------------------------------------------------------------------------------------------------------------------|-----|------|------|------|------|------|------|------|---|
| isoform=cb8564_c113842;full_length_coverage=1;non_full_length_coverage=0;isoform_length=1982;expected_accuracy=0.996<br>cb4674_c27/f1p1/2865  | isoform=cb8564_c109054;full_length_coverage=5;non_full_length_coverage=0;isoform_length=2034;expected_accuracy=1.000 |     |      |      |      |      |      |      |      | 4 |
| isoform=cb4674_c27;full_length_coverage=1;non_full_length_coverage=1;isoform_length=2865;expected_accuracy=0.993<br>cb8564_c4541/f3p0/2161    | gnl BL_ORD_ID 72844 cb4674_c33/f1p3/3281                                                                             | 1   | 2046 | 2041 | 2865 | 84   | 2136 | 2379 | 3207 |   |
| isoform=cb8564_c4541;full_length_coverage=3;non_full_length_coverage=0;isoform_length=2161;expected_accuracy=0.992<br>cb8564_c41115/f1p3/2751 | gnl BL_ORD_ID 14176 cb8564_c4538/f2p0/2766                                                                           | 1   | 1395 | 1393 | 2112 | 40   | 1430 | 2048 | 2766 |   |
| isoform=cb8564_c162907;full_length_coverage=1;non_full_length_coverage=0;isoform_length=2069;expected_accuracy=0.993<br>cb9436_c10/f1p0/2077  | gnl BL_ORD_ID 55596 cb8564_c46321/f1p2/2987                                                                          | 11  | 1542 | 1539 | 2685 | 26   | 1556 | 1728 | 2873 |   |
| isoform=cb8564_c162907;full_length_coverage=1;non_full_length_coverage=0;isoform_length=2069;expected_accuracy=0.993<br>cb9436_c10/f1p0/2077  | gnl BL_ORD_ID 14463 cb8564_c25154/f1p5/4276                                                                          | 261 | 2057 | 72   | 259  | 2418 | 4210 | 4    | 189  |   |
| isoform=cb9436_c10;full_length_coverage=1;non_full_length_coverage=0;isoform_length=2077;expected_accuracy=0.994<br>cb2482_c31/f1p1/2865      | gnl BL_ORD_ID 21678 cb9436_c4/f1p0/2516                                                                              | 688 | 2077 | 72   | 689  | 1088 | 2480 | 1    | 627  |   |
| isoform=cb2482_c31;full_length_coverage=1;non_full_length_coverage=1;isoform_length=2865;expected_accuracy=0.996<br>cb12495_c2/f1p0/1842      | gnl BL_ORD_ID 39015 cb2482_c57/f13p2/3062                                                                            | 1   | 2632 | 2631 | 2865 | 14   | 2636 | 2760 | 2994 |   |
|                                                                                                                                               | gnl BL_ORD_ID 72653 cb4536_c4/f1p0/2190                                                                              | 12  | 1407 | 1406 | 1840 | 1    | 136  | 1641 | 206  |   |

|                                                                                                                  |                                                                                                                                                                    |      |      |      |      |      |      |      |      |
|------------------------------------------------------------------------------------------------------------------|--------------------------------------------------------------------------------------------------------------------------------------------------------------------|------|------|------|------|------|------|------|------|
| isoform=cb12495_c2;full_length_coverage=1;non_full_length_coverage=0;isoform_length=1842;expected_accuracy=0.992 |                                                                                                                                                                    |      |      |      |      |      |      | 9    | 0    |
| cb8564_c117152/f1p0/2542                                                                                         | gnl BL_ORD_ID 52915 cb8564_c111606/f1p0/3227                                                                                                                       | 1057 | 2487 | 1    | 1058 | 1618 | 3048 | 3    | 1062 |
| cb5583_c3/f1p0/2163                                                                                              | gnl BL_ORD_ID 46284 cb5583_c1/f1p0/3059<br>isoform=cb5583_c1;full_length_coverage=1;non_full_length_coverage=0;isoform_length=3059;expected_accuracy=0.997         | 132  | 2071 | 1    | 137  | 1127 | 3059 | 1    | 138  |
| cb4128_c23/f1p0/2488                                                                                             | gnl BL_ORD_ID 70784 cb4128_c20/f1p0/3149<br>isoform=cb4128_c23;full_length_coverage=1;non_full_length_coverage=0;isoform_length=2488;expected_accuracy=0.999       | 1    | 1757 | 1756 | 2373 | 28   | 1785 | 2121 | 2738 |
| cb8564_c45300/f1p4/3014                                                                                          | gnl BL_ORD_ID 55246 cb8564_c36343/f1p0/3448<br>isoform=cb8564_c45300;full_length_coverage=1;non_full_length_coverage=4;isoform_length=3014;expected_accuracy=0.996 | 243  | 3014 | 2    | 246  | 410  | 3188 | 3    | 247  |
| cb6742_c12/f1p0/2398                                                                                             | gnl BL_ORD_ID 5508 cb6742_c3/f1p0/2514<br>isoform=cb6742_c3;full_length_coverage=1;non_full_length_coverage=0;isoform_length=2514;expected_accuracy=0.998          | 1    | 1343 | 1342 | 2304 | 55   | 1394 | 1508 | 2475 |
| cb2739_c7/f1p0/3065                                                                                              | gnl BL_ORD_ID 69937 cb2739_c8/f1p0/3454<br>isoform=cb2739_c7;full_length_coverage=1;non_full_length_coverage=0;isoform_length=3065;expected_accuracy=0.997         | 1    | 1801 | 1800 | 2810 | 428  | 2227 | 2450 | 3463 |
| cb8564_c42814/f1p0/2151                                                                                          | gnl BL_ORD_ID 13871 cb8564_c33702/f1p6/2850<br>isoform=cb8564_c42814;full_length_coverage=1;non_full_length_coverage=0;isoform_length=2151;expected_accuracy=0.995 | 650  | 2150 | 9    | 652  | 1350 | 2848 | 5    | 663  |

|                                                                                                                                                                         |                                                                                                                                                                                                 |     |      |      |      |     |          |      |          |
|-------------------------------------------------------------------------------------------------------------------------------------------------------------------------|-------------------------------------------------------------------------------------------------------------------------------------------------------------------------------------------------|-----|------|------|------|-----|----------|------|----------|
| accuracy=0.993<br>cb5440_c11/f2p0/1312<br>isoform=cb5440_c11;full_length_coverage=2;non_full_length_coverage=0;isoform_length=1312;expected_accuracy=0.995              | curacy=0.993<br>gnl BL_ORD_ID 46312                      cb5440_c8/f1p1/3070<br>isoform=cb5440_c8;full_length_coverage=1;non_full_length_coverage=1;isoform_length=3070;expected_accuracy=0.991 | 1   | 1019 | 1014 | 1312 | 126 | 1142     | 2735 | 303<br>7 |
| cb8564_c72680/f1p0/2685<br><br>cb2389_c15/f1p0/2930<br>isoform=cb2389_c15;full_length_coverage=1;non_full_length_coverage=0;isoform_length=2930;expected_accuracy=0.994 | gnl BL_ORD_ID 54696   cb8564_c154234/f1p3/3007<br><br>gnl BL_ORD_ID 68485   cb2389_c8/f1p0/3551                                                                                                 | 1   | 1735 | 1730 | 2636 | 13  | 174<br>7 | 1926 | 283<br>2 |
| cb8564_c49356/f1p0/3133                                                                                                                                                 | gnl BL_ORD_ID 18852                      cb8564_c84488/f1p0/3408<br>isoform=cb8564_c84488;full_length_coverage=1;non_full_length_coverage=0;isoform_length=3408;expected_accuracy=0.996         | 212 | 2848 | 1    | 212  | 790 | 340<br>8 | 1    | 217      |
| cb6283_c1/f1p0/2894<br>isoform=cb6283_c1;full_length_coverage=1;non_full_length_coverage=0;isoform_length=2894;expected_accuracy=1.000                                  | gnl BL_ORD_ID 5266                      cb6283_c2/f1p0/3571<br>isoform=cb6283_c2;full_length_coverage=1;non_full_length_coverage=0;isoform_length=3571;expected_accuracy=0.996                  | 1   | 2231 | 2228 | 2817 | 1   | 222<br>9 | 2982 | 357<br>1 |
| cb3537_c9/f1p0/3437                                                                                                                                                     | gnl BL_ORD_ID 39687                      cb3537_c0/f9p0/3405<br>isoform=cb3537_c0;full_length_coverage=9;non_full_length_coverage=0;isoform_length=3405;expected_accuracy=1.000                 | 369 | 3101 | 5    | 372  | 594 | 332<br>8 | 38   | 405      |
| cb1462_c0/f7p0/3659<br>isoform=cb1462_c0;full_length_coverage=7;non_full_length_coverage=0;isoform_length=3659;expected_accuracy=0.993                                  | gnl BL_ORD_ID 28515                      cb1462_c7/f1p0/3911<br>isoform=cb1462_c7;full_length_coverage=1;non_full_length_coverage=0;isoform_length=3911;expected_accuracy=0.991                 | 302 | 3655 | 1    | 302  | 579 | 3911     | 20   | 319      |

|                                                                                                                                                             |                                                                                                                                                                                     |     |      |      |      |    |      |      |      |
|-------------------------------------------------------------------------------------------------------------------------------------------------------------|-------------------------------------------------------------------------------------------------------------------------------------------------------------------------------------|-----|------|------|------|----|------|------|------|
| acy=1.000<br>cb8564_c47149/flp1/2601<br>isoform=cb8564_c47149;full_length_coverage=1;non_full_length_coverage=1;isoform_length=2601;expected_accuracy=0.997 | cy=0.993<br>gnl BL_ORD_ID 19224      cb8564_c87855/flp1/2779<br>isoform=cb8564_c87855;full_length_coverage=1;non_full_length_coverage=1;isoform_length=2779;expected_accuracy=0.997 | 1   | 1649 | 1649 | 2587 | 58 | 1705 | 1841 | 2779 |
| cb3449_c13/flp2/3050<br>isoform=cb3449_c13;full_length_coverage=1;non_full_length_coverage=2;isoform_length=3050;expected_accuracy=0.993                    | gnl BL_ORD_ID 39721      cb3449_c7/f3p0/3278<br>isoform=cb3449_c7;full_length_coverage=3;non_full_length_coverage=0;isoform_length=3278;expected_accuracy=1.000                     | 1   | 2755 | 2752 | 3045 | 21 | 2776 | 2944 | 3234 |
| cb8564_c181954/flp0/3278<br>isoform=cb8564_c181954;full_length_coverage=1;non_full_length_coverage=0;isoform_length=3278;expected_accuracy=0.994            | gnl BL_ORD_ID 55939      cb8564_c49630/flp4/3487                                                                                                                                    | 118 | 3024 | 3024 | 3272 | 3  | 2913 | 3243 | 3493 |
| cb7521_c46/flp0/2168                                                                                                                                        | gnl BL_ORD_ID 8990      cb7521_c33/fl4p4/2475<br>isoform=cb7521_c33;full_length_coverage=14;non_full_length_coverage=4;isoform_length=2475;expected_accuracy=1.000                  | 1   | 1630 | 1626 | 2043 | 89 | 1718 | 1919 | 2337 |
| cb8564_c89509/flp4/2644<br>isoform=cb8564_c89509;full_length_coverage=1;non_full_length_coverage=4;isoform_length=2644;expected_accuracy=1.000              | gnl BL_ORD_ID 15727      cb8564_c69026/f2p1/3011<br>isoform=cb8564_c69026;full_length_coverage=2;non_full_length_coverage=1;isoform_length=3011;expected_accuracy=0.999             | 13  | 1512 | 1509 | 2585 | 48 | 1534 | 1936 | 3011 |
| cb8564_c110973/flp0/1916<br>isoform=cb8564_c110973;full_length_coverage=1;non_full_length_coverage=0;isoform_length=1916;expected_accuracy=0.997            | gnl BL_ORD_ID 52629      cb8564_c1216/flp0/2122                                                                                                                                     | 10  | 1667 | 1667 | 1916 | 1  | 1654 | 1868 | 2117 |
| cb3354_c0/f6p0/1572                                                                                                                                         | gnl BL_ORD_ID 40592      cb3354_c3/flp0/2584                                                                                                                                        | 1   | 1213 | 1213 | 1572 | 2  | 121  | 2093 | 245  |

|                                                                                                                 |                                                                                                                                                                                           |     |      |      |      |      |          |      |          |
|-----------------------------------------------------------------------------------------------------------------|-------------------------------------------------------------------------------------------------------------------------------------------------------------------------------------------|-----|------|------|------|------|----------|------|----------|
| isoform=cb3354_c0;full_length_coverage=6;non_full_length_coverage=0;isoform_length=1572;expected_accuracy=1.000 | isoform=cb3354_c3;full_length_coverage=1;non_full_length_coverage=0;isoform_length=2584;expected_accuracy=0.999                                                                           |     |      |      |      |      | 3        |      | 2        |
| cb13617_c12/f1p0/1738                                                                                           | gnl BL_ORD_ID 25065                      cb13617_c5/f1p0/1777<br>isoform=cb13617_c5;full_length_coverage=1;non_full_length_coverage=0;isoform_length=1777;expected_accuracy=0.997         | 235 | 1663 | 5    | 236  | 348  | 177<br>6 | 4    | 235      |
| cb17137_c7/f1p1/1834                                                                                            | gnl BL_ORD_ID 10118                      cb8564_c109435/f1p1/2094<br>isoform=cb8564_c109435;full_length_coverage=1;non_full_length_coverage=1;isoform_length=2094;expected_accuracy=0.991 | 1   | 1291 | 1287 | 1692 | 1    | 131<br>7 | 1688 | 209<br>4 |
| cb3599_c13/f1p0/2987                                                                                            | gnl BL_ORD_ID 39122                      cb3599_c8/f1p1/2994<br>isoform=cb3599_c8;full_length_coverage=1;non_full_length_coverage=0;isoform_length=2987;expected_accuracy=0.998           | 1   | 2339 | 2334 | 2863 | 1    | 234<br>1 | 2460 | 299<br>1 |
| cb10092_c12/f1p5/1646                                                                                           | gnl BL_ORD_ID 16450                      cb8564_c72442/f2p1/2290<br>isoform=cb10092_c12;full_length_coverage=1;non_full_length_coverage=5;isoform_length=1646;expected_accuracy=0.992     | 569 | 1643 | 6    | 570  | 1158 | 223<br>4 | 14   | 583      |
| cb16968_c0/f1p0/1336                                                                                            | gnl BL_ORD_ID 71810                      cb4128_c17/f1p0/2338                                                                                                                             | 488 | 1232 | 6    | 489  | 1528 | 227<br>2 | 2    | 485      |
| cb2661_c7/f1p1/2908                                                                                             | gnl BL_ORD_ID 38208                      cb2661_c14/f6p2/3147<br>isoform=cb2661_c14;full_length_coverage=6;non_full_length_coverage=2;isoform_length=3147;expected_accuracy=1.000         | 1   | 2336 | 2332 | 2912 | 46   | 238<br>1 | 2545 | 312<br>5 |
| cb8564_c14767/f1p3/2856                                                                                         | gnl BL_ORD_ID 56381                      cb8564_c75626/f1p2/3199                                                                                                                          | 1   | 2112 | 2110 | 2607 | 4    | 2116     | 2611 | 310      |



|                          |                                                                                                                                                                         |      |      |      |      |      |      |      |      |   |
|--------------------------|-------------------------------------------------------------------------------------------------------------------------------------------------------------------------|------|------|------|------|------|------|------|------|---|
|                          |                                                                                                                                                                         |      |      |      |      |      |      |      |      | 8 |
| cb8564_c90231/f1p1/3635  | gnl BL_ORD_ID 13377      cb8564_c22091/f2p0/3351<br>isoform=cb8564_c22091;full_length_coverage=2;non_full_length_coverage=0;isoform_length=3351;expected_accuracy=0.997 | 1    | 1684 | 1681 | 3228 | 1    | 1682 | 1805 | 3351 |   |
| cb6622_c3/f2p0/2264      | gnl BL_ORD_ID 3916      cb6622_c4/f1p0/2808<br>isoform=cb6622_c3;full_length_coverage=2;non_full_length_coverage=0;isoform_length=2264;expected_accuracy=0.999          | 165  | 2229 | 1    | 162  | 743  | 2808 | 28   | 189  |   |
| cb5224_c19/f1p0/2383     | gnl BL_ORD_ID 73654      cb5224_c18/f1p0/2731<br>isoform=cb5224_c19;full_length_coverage=1;non_full_length_coverage=0;isoform_length=2383;expected_accuracy=0.995       | 123  | 2383 | 1    | 124  | 300  | 2569 | 1    | 124  |   |
| cb8167_c9/f1p0/2008      | gnl BL_ORD_ID 8220      cb8167_c17/f9p1/2166<br>isoform=cb8167_c9;full_length_coverage=1;non_full_length_coverage=0;isoform_length=2008;expected_accuracy=0.996         | 132  | 2006 | 1    | 130  | 292  | 2166 | 24   | 152  |   |
| cb8564_c10808/f1p0/2532  | gnl BL_ORD_ID 54302      cb8564_c22058/f1p5/3725                                                                                                                        | 426  | 2359 | 7    | 426  | 1786 | 3719 | 1127 | 1546 |   |
| cb8564_c1737/f1p0/3386   | gnl BL_ORD_ID 53750      cb8564_c1734/f1p0/3808                                                                                                                         | 1636 | 3399 | 1    | 1638 | 2011 | 3774 | 1    | 1638 |   |
| cb8564_c41756/f1p0/2738  | gnl BL_ORD_ID 55371      cb8564_c39756/f1p1/3004<br>isoform=cb8564_c41756;full_length_coverage=1;non_full_length_coverage=0;isoform_length=2738;expected_accuracy=0.996 | 1    | 2173 | 2170 | 2738 | 1    | 2151 | 2274 | 2854 |   |
| cb8564_c129284/f1p0/2118 | gnl BL_ORD_ID 12475      cb8564_c148406/f2p0/2449                                                                                                                       | 1    | 1970 | 1965 | 2118 | 49   | 203  | 2216 | 237  |   |

|                                                                                                                      |                                                                                                                                                                           |      |      |      |      |      |      |      |      |   |
|----------------------------------------------------------------------------------------------------------------------|---------------------------------------------------------------------------------------------------------------------------------------------------------------------------|------|------|------|------|------|------|------|------|---|
| isoform=cb8564_c129284;full_length_coverage=1;non_full_length_coverage=0;isoform_length=2118;expected_accuracy=0.991 | isoform=cb8564_c148406;full_length_coverage=2;non_full_length_coverage=0;isoform_length=2449;expected_accuracy=0.990                                                      |      |      |      |      |      |      | 1    |      | 0 |
| cb17137_c7/f1p1/1834                                                                                                 | gnl BL_ORD_ID 9597      cb8564_c122279/f1p2/2123<br>isoform=cb8564_c122279;full_length_coverage=1;non_full_length_coverage=2;isoform_length=2123;expected_accuracy=0.992  | 1    | 1291 | 1287 | 1694 | 1    | 1289 | 1660 | 2067 |   |
| cb8564_c145335/f3p0/1964                                                                                             | gnl BL_ORD_ID 12164      cb8564_c146670/f2p0/2135<br>isoform=cb8564_c146670;full_length_coverage=2;non_full_length_coverage=0;isoform_length=2135;expected_accuracy=0.998 | 136  | 1960 | 1    | 132  | 312  | 2135 | 1    | 130  |   |
| cb8564_c188097/f1p0/2552                                                                                             | gnl BL_ORD_ID 10640      cb8564_c100234/f2p5/2744<br>isoform=cb8564_c100234;full_length_coverage=2;non_full_length_coverage=5;isoform_length=2744;expected_accuracy=0.993 | 1    | 1945 | 1940 | 2552 | 6    | 1960 | 2063 | 2675 |   |
| cb548_c39/f1p3/2934                                                                                                  | gnl BL_ORD_ID 46779      cb548_c109/f1p0/3280<br>isoform=cb548_c109;full_length_coverage=1;non_full_length_coverage=3;isoform_length=2934;expected_accuracy=0.996         | 1313 | 2934 | 1    | 1316 | 1551 | 3165 | 45   | 1340 |   |
| cb6798_c22/f1p0/2208                                                                                                 | gnl BL_ORD_ID 50075      cb6798_c12/f1p4/2573                                                                                                                             | 619  | 2195 | 8    | 624  | 916  | 2492 | 76   | 679  |   |
| cb1573_c16/f1p0/3454                                                                                                 | gnl BL_ORD_ID 30864      cb1573_c21/f1p2/3728<br>isoform=cb1573_c21;full_length_coverage=1;non_full_length_coverage=2;isoform_length=3728;expected_accuracy=0.991         | 1249 | 3454 | 1    | 1252 | 1446 | 3669 | 27   | 1287 |   |
| cb5904_c10/f1p1/1410                                                                                                 | gnl BL_ORD_ID 46482      cb5904_c12/f1p0/1469                                                                                                                             | 437  | 1353 | 6    | 436  | 554  | 146  | 7    | 435  |   |

|                                                                                                                   |                                                                                                                   |                       |     |      |      |      |     |      |      |      |
|-------------------------------------------------------------------------------------------------------------------|-------------------------------------------------------------------------------------------------------------------|-----------------------|-----|------|------|------|-----|------|------|------|
|                                                                                                                   | isoform=cb5904_c12;full_length_coverage=1;non_full_length_coverage=0;isoform_length=1469;expected_accuracy=0.997  |                       |     |      |      |      |     |      |      | 9    |
| cb2785_c14/f1p0/2954                                                                                              | gnl BL_ORD_ID 36869                                                                                               | cb2785_c10/f1p0/3807  |     |      |      |      |     |      |      |      |
| isoform=cb2785_c14;full_length_coverage=1;non_full_length_coverage=0;isoform_length=2954;expected_accuracy=0.996  | isoform=cb2785_c10;full_length_coverage=1;non_full_length_coverage=0;isoform_length=3807;expected_accuracy=0.996  |                       | 1   | 2218 | 2220 | 2909 | 1   | 2210 | 3119 | 3807 |
| cb8234_c42/f3p0/2289                                                                                              | gnl BL_ORD_ID 8908                                                                                                | cb8234_c5/f4p2/3010   |     |      |      |      |     |      |      |      |
| isoform=cb8234_c42;full_length_coverage=3;non_full_length_coverage=0;isoform_length=2289;expected_accuracy=0.995  | isoform=cb8234_c5;full_length_coverage=4;non_full_length_coverage=2;isoform_length=3010;expected_accuracy=1.000   |                       | 176 | 2244 | 1    | 179  | 949 | 3010 | 55   | 232  |
| cb9813_c144/f1p0/1034                                                                                             | gnl BL_ORD_ID 58920                                                                                               | cb9813_c57/f1p0/1921  |     |      |      |      |     |      |      |      |
| isoform=cb9813_c144;full_length_coverage=1;non_full_length_coverage=0;isoform_length=1034;expected_accuracy=1.000 |                                                                                                                   |                       | 8   | 766  | 762  | 1034 | 4   | 762  | 1487 | 1758 |
| cb7642_c53/f1p0/1947                                                                                              | gnl BL_ORD_ID 6848                                                                                                | cb7642_c9/f1p2/2076   |     |      |      |      |     |      |      |      |
| isoform=cb7642_c53;full_length_coverage=1;non_full_length_coverage=0;isoform_length=1947;expected_accuracy=0.990  | isoform=cb7642_c9;full_length_coverage=1;non_full_length_coverage=2;isoform_length=2076;expected_accuracy=0.999   |                       | 1   | 1181 | 1178 | 1946 | 6   | 1194 | 1302 | 2073 |
| cb8564_c836/f4p0/2537                                                                                             | gnl BL_ORD_ID 17399                                                                                               | cb8564_c984/f3p0/2649 |     |      |      |      |     |      |      |      |
| isoform=cb8564_c836;full_length_coverage=4;non_full_length_coverage=0;isoform_length=2537;expected_accuracy=1.000 | isoform=cb8564_c984;full_length_coverage=3;non_full_length_coverage=0;isoform_length=2649;expected_accuracy=1.000 |                       | 148 | 2511 | 1    | 151  | 285 | 2649 | 2    | 154  |
| cb653_c12/f1p0/3754                                                                                               | gnl BL_ORD_ID 5131                                                                                                | cb653_c8/f1p1/4297    |     |      |      |      |     |      |      |      |
| isoform=cb653_c12;full_length_coverage=1;non_full_length_coverage=0;isoform_length=3754;expected_accuracy=1.000   | isoform=cb653_c8;full_length_coverage=1;non_full_length_coverage=1;isoform_length=4297;expected_accuracy=1.000    |                       | 195 | 3754 | 1    | 196  | 703 | 4259 | 110  | 308  |

|                                                                                                                     |                                                                                                                  |     |      |      |      |      |     |      |     |  |  |
|---------------------------------------------------------------------------------------------------------------------|------------------------------------------------------------------------------------------------------------------|-----|------|------|------|------|-----|------|-----|--|--|
| acy=0.995                                                                                                           | y=0.999                                                                                                          |     |      |      |      |      |     |      |     |  |  |
| cb401_c94/f1p0/2488                                                                                                 | gnl BL_ORD_ID 70873 cb401_c42/f1p0/2704                                                                          | 1   | 1605 | 1603 | 2280 | 90   | 167 | 2018 | 269 |  |  |
| cb8564_c44290/f1p1/3198                                                                                             | gnl BL_ORD_ID 56029 cb8564_c52782/f1p2/3327                                                                      | 339 | 2983 | 7    | 338  | 618  | 326 | 11   | 320 |  |  |
| cb8564_c89918/f1p1/2045                                                                                             |                                                                                                                  |     |      |      |      |      |     |      |     |  |  |
| isoform=cb8564_c89918;full_length_coverage=1;non_full_length_coverage=1;isoform_length=2045;expected_accuracy=0.991 | gnl BL_ORD_ID 53524 cb8564_c127653/f1p0/2575                                                                     | 1   | 1616 | 1611 | 2045 | 29   | 161 | 1811 | 224 |  |  |
| cb18199_c0/f1p0/1356                                                                                                | gnl BL_ORD_ID 29800 cb1494_c10/f1p0/3165                                                                         |     |      |      |      |      |     |      |     |  |  |
| isoform=cb18199_c0;full_length_coverage=1;non_full_length_coverage=0;isoform_length=1356;expected_accuracy=0.992    | isoform=cb1494_c10;full_length_coverage=1;non_full_length_coverage=0;isoform_length=3165;expected_accuracy=0.994 | 101 | 1344 | 1    | 102  | 1854 | 310 | 666  | 767 |  |  |
| cb6491_c8/f1p1/3298                                                                                                 | gnl BL_ORD_ID 3949 cb6491_c2/f1p0/4290                                                                           |     |      |      |      |      |     |      |     |  |  |
| isoform=cb6491_c8;full_length_coverage=1;non_full_length_coverage=1;isoform_length=3298;expected_accuracy=0.991     | isoform=cb6491_c2;full_length_coverage=1;non_full_length_coverage=0;isoform_length=4290;expected_accuracy=0.996  | 1   | 2917 | 2915 | 3295 | 11   | 293 | 3099 | 346 |  |  |
| cb5600_c21/f1p0/2784                                                                                                | gnl BL_ORD_ID 46920 cb5600_c22/f9p0/2763                                                                         |     |      |      |      |      |     |      |     |  |  |
|                                                                                                                     | isoform=cb5600_c22;full_length_coverage=9;non_full_length_coverage=0;isoform_length=2763;expected_accuracy=1.000 | 1   | 2095 | 2098 | 2525 | 44   | 213 | 2322 | 274 |  |  |
| cb1312_c24/f1p0/3018                                                                                                | gnl BL_ORD_ID 27493 cb1312_c35/f1p0/3895                                                                         |     |      |      |      |      |     |      |     |  |  |
|                                                                                                                     | isoform=cb1312_c35;full_length_coverage=1;non_full_length_coverage=0;isoform_length=3895;expected_accuracy=0.990 | 1   | 1532 | 1531 | 2888 | 146  | 167 | 2478 | 382 |  |  |
| cb8564_c127097/f1p0/2380                                                                                            | gnl BL_ORD_ID 14828 cb8564_c4561/f2p0/3092                                                                       | 1   | 1714 | 1713 | 2380 | 23   | 173 | 2383 | 304 |  |  |

|                                                                                                                                               |                                                                                                                                                                                         |     |      |      |      |      |      |      |      |
|-----------------------------------------------------------------------------------------------------------------------------------------------|-----------------------------------------------------------------------------------------------------------------------------------------------------------------------------------------|-----|------|------|------|------|------|------|------|
| isoform=cb8564_c127097;full_length_coverage=1;non_full_length_coverage=0;isoform_length=2380;expected_accuracy=0.994<br>cb4684_c0/f6p1/3038   | isoform=cb8564_c4561;full_length_coverage=2;non_full_length_coverage=0;isoform_length=3092;expected_accuracy=0.997<br>gnl BL_ORD_ID 41678                      cb4684_c5/f1p0/3247      |     |      |      |      |      | 6    |      | 9    |
| isoform=cb4684_c0;full_length_coverage=6;non_full_length_coverage=1;isoform_length=3038;expected_accuracy=1.000<br>cb8564_c38570/f2p2/2760    | isoform=cb4684_c5;full_length_coverage=1;non_full_length_coverage=0;isoform_length=3247;expected_accuracy=0.997<br>gnl BL_ORD_ID 16477                      cb8564_c53604/f2p1/4117     | 1   | 1525 | 1523 | 3038 | 7    | 1534 | 1694 | 3211 |
| isoform=cb8564_c38570;full_length_coverage=2;non_full_length_coverage=2;isoform_length=2760;expected_accuracy=0.996<br>cb16651_c20/f1p1/3052  | isoform=cb8564_c53604;full_length_coverage=2;non_full_length_coverage=1;isoform_length=4117;expected_accuracy=0.997<br>gnl BL_ORD_ID 31471                      cb16651_c8/f1p3/3966    | 198 | 2732 | 1    | 198  | 1581 | 4117 | 1260 | 1465 |
| isoform=cb16651_c20;full_length_coverage=1;non_full_length_coverage=1;isoform_length=3052;expected_accuracy=0.991<br>cb8564_c50697/f1p3/2172  | isoform=cb16651_c8;full_length_coverage=1;non_full_length_coverage=3;isoform_length=3966;expected_accuracy=0.999<br>gnl BL_ORD_ID 15568                      cb8564_c48661/f1p2/2634    | 440 | 3052 | 5    | 441  | 1295 | 3905 | 1    | 420  |
| isoform=cb8564_c50697;full_length_coverage=1;non_full_length_coverage=3;isoform_length=2172;expected_accuracy=0.993<br>cb8564_c9734/f3p3/2491 | isoform=cb8564_c48661;full_length_coverage=1;non_full_length_coverage=2;isoform_length=2634;expected_accuracy=0.998<br>gnl BL_ORD_ID 55287                      cb8564_c37310/f1p0/2716 | 106 | 2118 | 1    | 108  | 627  | 2634 | 15   | 122  |
| isoform=cb8564_c9734;full_length_coverage=3;non_full_length_coverage=3;isoform_length=2491;expected_accuracy=1.000<br>cb8564_c35865/f2p2/3469 | isoform=cb8564_c37310;full_length_coverage=1;non_full_length_coverage=1;isoform_length=2716;expected_accuracy=0.999<br>gnl BL_ORD_ID 55825                      cb8564_c41971/f1p0/3567 | 13  | 1753 | 1751 | 2438 | 1    | 1754 | 1860 | 2547 |
| isoform=cb8564_c35865;full_length_coverage=2;non_full_length_coverage=2;isoform_length=3469;expected_                                         |                                                                                                                                                                                         | 1   | 2819 | 2816 | 3452 | 1    | 2814 | 2943 | 3582 |

| accuracy=1.000                                                                                                                           |                                                                                                                                                                         |      |      |      |      |      |      |      |      |  |
|------------------------------------------------------------------------------------------------------------------------------------------|-------------------------------------------------------------------------------------------------------------------------------------------------------------------------|------|------|------|------|------|------|------|------|--|
| cb8564_c47522/f1p0/2954                                                                                                                  | gnl BL_ORD_ID 16705      cb8564_c53880/f1p0/3484<br>isoform=cb8564_c53880;full_length_coverage=1;non_full_length_coverage=0;isoform_length=3484;expected_accuracy=0.996 | 1035 | 2849 | 1    | 1036 | 1672 | 3484 | 1    | 1056 |  |
| cb8564_c54537/f1p0/3163                                                                                                                  | gnl BL_ORD_ID 56029      cb8564_c52782/f1p2/3327                                                                                                                        | 313  | 2933 | 6    | 312  | 618  | 3238 | 11   | 320  |  |
| cb8564_c14548/f1p0/3030                                                                                                                  | gnl BL_ORD_ID 9350      cb8564_c11826/f1p0/2916<br>isoform=cb8564_c11826;full_length_coverage=1;non_full_length_coverage=0;isoform_length=2916;expected_accuracy=0.997  | 1306 | 2656 | 13   | 1307 | 1543 | 2916 | 4    | 1296 |  |
| cb8564_c43601/f1p0/2228                                                                                                                  | gnl BL_ORD_ID 55236      cb8564_c36133/f1p0/4635                                                                                                                        | 1    | 1814 | 1814 | 2058 | 1817 | 3630 | 3984 | 4231 |  |
| cb2640_c12/f1p0/3046<br>isoform=cb2640_c12;full_length_coverage=1;non_full_length_coverage=0;isoform_length=3046;expected_accuracy=0.994 | gnl BL_ORD_ID 69859      cb2640_c29/f1p0/3441                                                                                                                           | 192  | 3046 | 1    | 193  | 355  | 3206 | 10   | 228  |  |
| cb13985_c3/f1p0/1395<br>isoform=cb13985_c3;full_length_coverage=1;non_full_length_coverage=0;isoform_length=1395;expected_accuracy=1.000 | gnl BL_ORD_ID 62962      cb13985_c10/f1p0/1780                                                                                                                          | 107  | 1389 | 1    | 111  | 347  | 1629 | 42   | 149  |  |
| cb8437_c0/f1p0/2371                                                                                                                      | gnl BL_ORD_ID 51940      cb8437_c1/f1p0/2316                                                                                                                            | 1    | 1824 | 1823 | 2201 | 1    | 1823 | 1947 | 2325 |  |
| cb6090_c5/f1p0/2373<br>isoform=cb6090_c5;full_length_coverage=1;non_full_length_coverage=0;isoform_length=2373;expected_accuracy=1.000   | gnl BL_ORD_ID 73488      cb6090_c3/f1p0/2843                                                                                                                            | 1    | 1689 | 1688 | 2372 | 4    | 1693 | 2176 | 2862 |  |

---

|                         |                     |                         |                                                                                                                     |      |      |      |      |      |      |      |      |
|-------------------------|---------------------|-------------------------|---------------------------------------------------------------------------------------------------------------------|------|------|------|------|------|------|------|------|
| acy=0.995               |                     |                         |                                                                                                                     |      |      |      |      |      |      |      |      |
| cb1065_c16/f1p0/2119    | gnl BL_ORD_ID 1631  | cb1065_c8/f1p0/2427     | isoform=cb1065_c8;full_length_coverage=1;non_full_length_coverage=0;isoform_length=2427;expected_accuracy=0.994     | 1014 | 2114 | 1    | 1016 | 1319 | 2427 | 81   | 1098 |
| cb2737_c35/f1p0/2780    | gnl BL_ORD_ID 68786 | cb2737_c50/f1p0/3706    | isoform=cb2737_c35;full_length_coverage=1;non_full_length_coverage=0;isoform_length=2780;expected_accuracy=0.993    | 134  | 1541 | 1539 | 2780 | 675  | 2082 | 2214 | 3456 |
| cb5183_c100/f1p2/1592   | gnl BL_ORD_ID 73597 | cb5183_c43/f1p0/2049    | isoform=cb5183_c100;full_length_coverage=1;non_full_length_coverage=2;isoform_length=1592;expected_accuracy=0.998   | 278  | 1577 | 66   | 282  | 436  | 1735 | 95   | 311  |
| cb8564_c36689/f1p1/2368 | gnl BL_ORD_ID 16805 | cb8564_c66657/f4p6/2862 | isoform=cb8564_c36689;full_length_coverage=1;non_full_length_coverage=1;isoform_length=2368;expected_accuracy=0.991 | 1    | 1709 | 1706 | 2368 | 29   | 1700 | 2199 | 2862 |
| cb3783_c10/f1p0/3098    | gnl BL_ORD_ID 40402 | cb3783_c2/f1p2/3529     | isoform=cb3783_c2;full_length_coverage=1;non_full_length_coverage=2;isoform_length=3529;expected_accuracy=0.998     | 1    | 1765 | 1761 | 3029 | 15   | 1779 | 2250 | 3518 |
| cb8564_c46939/f1p1/2926 | gnl BL_ORD_ID 55522 | cb8564_c44123/f1p1/3230 | isoform=cb8564_c46939;full_length_coverage=1;non_full_length_coverage=1;isoform_length=2926;expected_accuracy=0.991 | 16   | 2134 | 2130 | 2870 | 15   | 2140 | 2245 | 2985 |
| cb8564_c38035/f1p0/2770 | gnl BL_ORD_ID 13976 | cb8564_c43401/f1p2/3025 | isoform=cb8564_c38035;full_length_coverage=1;non_full_length_coverage=2;isoform_length=3025;expected_accuracy=0.991 | 1    | 2035 | 2033 | 2756 | 1    | 2099 | 2289 | 3023 |

---





|                                                                                                                     |                                                                                                                     |      |      |      |      |      |     |      |     |   |   |
|---------------------------------------------------------------------------------------------------------------------|---------------------------------------------------------------------------------------------------------------------|------|------|------|------|------|-----|------|-----|---|---|
| acy=0.998                                                                                                           | cy=0.993                                                                                                            |      |      |      |      |      |     |      |     |   |   |
| cb8564_c118011/f1p0/1965                                                                                            | gnl BL_ORD_ID 54731 cb8564_c160518/f1p2/2775                                                                        | 1    | 1321 | 1321 | 1964 | 530  | 186 | 2043 | 268 | 3 | 3 |
| cb8564_c43399/f1p0/2654                                                                                             |                                                                                                                     |      |      |      |      |      |     |      |     |   |   |
| isoform=cb8564_c43399;full_length_coverage=1;non_full_length_coverage=0;isoform_length=2654;expected_accuracy=0.999 | gnl BL_ORD_ID 54403 cb8564_c35093/f1p5/2916                                                                         | 2    | 2367 | 2363 | 2653 | 20   | 238 | 2596 | 288 | 0 | 5 |
| cb3856_c1/f2p0/1847                                                                                                 | gnl BL_ORD_ID 40760 cb3856_c3/f1p0/3507                                                                             |      |      |      |      |      |     |      |     |   |   |
| isoform=cb3856_c1;full_length_coverage=2;non_full_length_coverage=0;isoform_length=1847;expected_accuracy=0.996     | isoform=cb3856_c3;full_length_coverage=1;non_full_length_coverage=0;isoform_length=3507;expected_accuracy=0.998     | 365  | 1847 | 9    | 367  | 2020 | 350 | 1    | 363 | 1 |   |
| cb8564_c44698/f1p5/2843                                                                                             | gnl BL_ORD_ID 13976 cb8564_c43401/f1p2/3025                                                                         |      |      |      |      |      |     |      |     |   |   |
| isoform=cb8564_c44698;full_length_coverage=1;non_full_length_coverage=5;isoform_length=2843;expected_accuracy=0.997 | isoform=cb8564_c43401;full_length_coverage=1;non_full_length_coverage=2;isoform_length=3025;expected_accuracy=0.995 | 1    | 2516 | 2511 | 2829 | 1    | 257 | 2701 | 302 | 8 | 5 |
| cb7584_c3/f2p2/1694                                                                                                 |                                                                                                                     |      |      |      |      |      |     |      |     |   |   |
| isoform=cb7584_c3;full_length_coverage=2;non_full_length_coverage=2;isoform_length=1694;expected_accuracy=0.999     | gnl BL_ORD_ID 50612 cb7584_c12/f1p0/1881                                                                            | 1    | 1346 | 1345 | 1694 | 1    | 134 | 1495 | 184 | 5 | 4 |
| cb6342_c4/f1p0/2662                                                                                                 | gnl BL_ORD_ID 5291 cb6342_c3/f1p0/2889                                                                              |      |      |      |      |      |     |      |     |   |   |
| isoform=cb6342_c4;full_length_coverage=1;non_full_length_coverage=0;isoform_length=2662;expected_accuracy=0.998     | isoform=cb6342_c3;full_length_coverage=1;non_full_length_coverage=0;isoform_length=2889;expected_accuracy=0.999     | 1259 | 2593 | 1    | 1259 | 1555 | 288 | 196  | 145 | 9 | 3 |
| cb513_c6/f1p0/2997                                                                                                  | gnl BL_ORD_ID 43725 cb513_c4/f1p0/3166                                                                              |      |      |      |      |      |     |      |     |   |   |
| isoform=cb513_c6;full_length_coverage=1;non_full_length_coverage=0;isoform_length=2997;expected_accuracy=0.999      | isoform=cb513_c4;full_length_coverage=1;non_full_length_coverage=0;isoform_length=3166;expected_accuracy=0.999      | 1    | 2137 | 2136 | 2997 | 35   | 214 | 2304 | 316 | 9 | 5 |

|                                                                                                                                                           |                                                                                                                                                                         |     |      |      |      |     |          |      |          |
|-----------------------------------------------------------------------------------------------------------------------------------------------------------|-------------------------------------------------------------------------------------------------------------------------------------------------------------------------|-----|------|------|------|-----|----------|------|----------|
| y=0.997<br>cb8564_c15996/f1p5/3083<br>isoform=cb8564_c15996;full_length_coverage=1;non_full_length_coverage=5;isoform_length=3083;expected_accuracy=0.993 | y=0.995<br>gnl BL_ORD_ID 54027 cb8564_c17122/f1p0/3317                                                                                                                  | 323 | 3083 | 9    | 328  | 471 | 322<br>9 | 12   | 330      |
| cb5921_c27/f1p2/2226<br>isoform=cb5921_c27;full_length_coverage=1;non_full_length_coverage=2;isoform_length=2226;expected_accuracy=0.995                  | gnl BL_ORD_ID 74654 cb5921_c44/f1p1/2444                                                                                                                                | 1   | 2024 | 2025 | 2176 | 63  | 207<br>0 | 2184 | 233<br>6 |
| cb13842_c5/f1p0/1399<br>isoform=cb13842_c5;full_length_coverage=1;non_full_length_coverage=0;isoform_length=1399;expected_accuracy=0.992                  | gnl BL_ORD_ID 16206      cb8564_c74486/f1p0/4128<br>isoform=cb8564_c74486;full_length_coverage=1;non_full_length_coverage=0;isoform_length=4128;expected_accuracy=0.993 | 1   | 1043 | 1038 | 1398 | 89  | 1137     | 3757 | 412<br>8 |
| cb8564_c41385/f1p1/3331<br>isoform=cb8564_c41385;full_length_coverage=1;non_full_length_coverage=1;isoform_length=3331;expected_accuracy=0.996            | gnl BL_ORD_ID 18317      cb8564_c80643/f1p1/3548<br>isoform=cb8564_c80643;full_length_coverage=1;non_full_length_coverage=1;isoform_length=3548;expected_accuracy=0.991 | 2   | 2276 | 2276 | 3316 | 1   | 225<br>1 | 2509 | 354<br>8 |
| cb14752_c10/f1p1/6425                                                                                                                                     | gnl BL_ORD_ID 64264 cb14752_c8/f1p0/6702                                                                                                                                | 3   | 5073 | 5073 | 6196 | 3   | 507<br>3 | 5181 | 630<br>4 |
| cb8564_c46857/f1p0/2753<br>isoform=cb8564_c46857;full_length_coverage=1;non_full_length_coverage=0;isoform_length=2753;expected_accuracy=0.997            | gnl BL_ORD_ID 16567      cb8564_c50175/f1p0/2779<br>isoform=cb8564_c50175;full_length_coverage=1;non_full_length_coverage=0;isoform_length=2779;expected_accuracy=1.000 | 1   | 1659 | 1658 | 2692 | 4   | 164<br>6 | 1747 | 277<br>9 |
| cb8564_c146219/f5p0/2824<br>isoform=cb8564_c146219;full_length_coverage=5;non_full_length_coverage=0;isoform_length=2824;expected                         | gnl BL_ORD_ID 11423      cb8564_c12647/f1p0/3038<br>isoform=cb8564_c12647;full_length_coverage=1;non_full_length_coverage=0;isoform_length=3038;expected_ac             | 1   | 2012 | 2011 | 2788 | 150 | 216<br>2 | 2262 | 303<br>8 |

|                                                                                                                                                             |                                                                                                                                                                |      |      |      |      |      |          |      |          |
|-------------------------------------------------------------------------------------------------------------------------------------------------------------|----------------------------------------------------------------------------------------------------------------------------------------------------------------|------|------|------|------|------|----------|------|----------|
| _accuracy=0.997<br>cb15484_c3/f1p0/1383<br>isoform=cb15484_c3;full_length_coverage=1;non_full_length_coverage=0;isoform_length=1383;expected_accuracy=0.991 | curacy=1.000<br>gnl BL_ORD_ID 63438 cb15484_c1/f1p0/1723                                                                                                       | 1    | 1020 | 1019 | 1383 | 194  | 121<br>3 | 1332 | 169<br>2 |
| cb862_c7/f1p0/2681                                                                                                                                          | gnl BL_ORD_ID 17512 cb862_c1/f2p0/3252<br>isoform=cb862_c1;full_length_coverage=2;non_full_length_coverage=0;isoform_length=3252;expected_accuracy=0.998       | 1294 | 2697 | 1    | 1294 | 1810 | 321<br>3 | 1    | 129<br>5 |
| cb3143_c10/f1p1/2863                                                                                                                                        | gnl BL_ORD_ID 37665 cb3143_c33/f10p3/3441<br>isoform=cb3143_c33;full_length_coverage=10;non_full_length_coverage=3;isoform_length=3441;expected_accuracy=1.000 | 163  | 2870 | 1    | 163  | 723  | 342<br>8 | 163  | 325      |
| cb341_c7/f1p0/2819<br>isoform=cb341_c7;full_length_coverage=1;non_full_length_coverage=0;isoform_length=2819;expected_accuracy=1.000                        | gnl BL_ORD_ID 69575 cb341_c16/f1p0/3691                                                                                                                        | 1    | 2507 | 2507 | 2819 | 13   | 252<br>0 | 3002 | 331<br>4 |
| cb8564_c42285/f1p0/3370                                                                                                                                     | gnl BL_ORD_ID 55920 cb8564_c48949/f1p0/4357                                                                                                                    | 1    | 2288 | 2289 | 2953 | 2    | 229<br>3 | 2847 | 350<br>8 |
| cb3143_c7/f1p1/3040<br>isoform=cb3143_c7;full_length_coverage=1;non_full_length_coverage=1;isoform_length=3040;expected_accuracy=1.000                      | gnl BL_ORD_ID 37665 cb3143_c33/f10p3/3441<br>isoform=cb3143_c33;full_length_coverage=10;non_full_length_coverage=3;isoform_length=3441;expected_accuracy=1.000 | 321  | 3038 | 6    | 321  | 723  | 344<br>1 | 39   | 349      |
| cb1291_c2/f6p1/2729<br>isoform=cb1291_c2;full_length_coverage=6;non_full_length_coverage=1;isoform_length=2729;expected_accuracy=1.000                      | gnl BL_ORD_ID 26064 cb1291_c4/f1p1/4391<br>isoform=cb1291_c4;full_length_coverage=1;non_full_length_coverage=1;isoform_length=4391;expected_accuracy=1.000     | 1    | 2082 | 2081 | 2709 | 13   | 209<br>2 | 3764 | 439<br>1 |

|                                                                                                                                                       |                                                                                                                                                                               |     |      |      |      |      |      |      |      |
|-------------------------------------------------------------------------------------------------------------------------------------------------------|-------------------------------------------------------------------------------------------------------------------------------------------------------------------------------|-----|------|------|------|------|------|------|------|
| acy=1.000<br>cb6071_c14/f1p2/5103<br>isoform=cb6071_c14;full_length_coverage=1;non_full_length_coverage=2;isoform_length=5103;expected_accuracy=0.997 | cy=1.000<br>gnl BL_ORD_ID 45341      cb6071_c15/f2p2/5278<br>isoform=cb6071_c15;full_length_coverage=2;non_full_length_coverage=2;isoform_length=5278;expected_accuracy=0.997 | 305 | 5103 | 1    | 304  | 483  | 5278 | 10   | 316  |
| cb8564_c188097/f1p0/2552<br>isoform=cb8564_c188097;full_length_coverage=1;non_full_length_coverage=0;isoform_length=2552;expected_accuracy=0.996      | gnl BL_ORD_ID 17272      cb8564_c91851/f1p1/2644<br>isoform=cb8564_c91851;full_length_coverage=1;non_full_length_coverage=1;isoform_length=2644;expected_accuracy=0.993       | 1   | 1945 | 1940 | 2552 | 1    | 1944 | 2047 | 2643 |
| cb8564_c112420/f1p0/2041                                                                                                                              | gnl BL_ORD_ID 16302      cb8564_c5251/f1p0/3184<br>isoform=cb8564_c5251;full_length_coverage=1;non_full_length_coverage=0;isoform_length=3184;expected_accuracy=0.992         | 627 | 1728 | 8    | 628  | 2073 | 3171 | 43   | 665  |
| cb8564_c123294/f1p0/1926                                                                                                                              | gnl BL_ORD_ID 11640      cb8564_c127145/f1p0/2046<br>isoform=cb8564_c127145;full_length_coverage=1;non_full_length_coverage=0;isoform_length=2046;expected_accuracy=0.992     | 1   | 1473 | 1472 | 1827 | 35   | 1505 | 1691 | 2046 |
| cb14220_c21/f1p1/5537                                                                                                                                 | gnl BL_ORD_ID 25175      cb14220_c15/f1p5/6485<br>isoform=cb14220_c15;full_length_coverage=1;non_full_length_coverage=5;isoform_length=6485;expected_accuracy=0.999           | 1   | 4570 | 4569 | 5549 | 712  | 5268 | 5390 | 6384 |
| cb8564_c43455/f1p0/2242<br>isoform=cb8564_c43455;full_length_coverage=1;non_full_length_coverage=0;isoform_length=2242;expected_accuracy=0.995        | gnl BL_ORD_ID 55431      cb8564_c41557/f1p0/3003                                                                                                                              | 279 | 2242 | 4    | 283  | 550  | 2520 | 2    | 281  |
| cb11044_c2/f1p0/1717                                                                                                                                  | gnl BL_ORD_ID 2336      cb11044_c1/f1p1/2587                                                                                                                                  | 331 | 1691 | 58   | 331  | 1221 | 258  | 1    | 276  |

|                                                                                                                                                |                                                                                                                                                                                                                            |     |      |      |      |     |      |      |     |   |
|------------------------------------------------------------------------------------------------------------------------------------------------|----------------------------------------------------------------------------------------------------------------------------------------------------------------------------------------------------------------------------|-----|------|------|------|-----|------|------|-----|---|
| isoform=cb11044_c2;full_length_coverage=1;non_full_length_coverage=0;isoform_length=1717;expected_accuracy=0.998<br>cb12349_c8/f1p0/1434       | isoform=cb11044_c1;full_length_coverage=1;non_full_length_coverage=1;isoform_length=2587;expected_accuracy=0.997                                                                                                           |     |      |      |      |     |      |      |     | 7 |
| isoform=cb12349_c8;full_length_coverage=1;non_full_length_coverage=0;isoform_length=1434;expected_accuracy=0.995<br>cb8564_c43779/f1p0/3021    | gnl BL_ORD_ID 61692 cb12349_c11/f1p0/1764                                                                                                                                                                                  | 1   | 1193 | 1191 | 1434 | 7   | 1192 | 1293 | 153 | 5 |
| isoform=cb8564_c43779;full_length_coverage=1;non_full_length_coverage=0;isoform_length=3021;expected_accuracy=0.993<br>cb1837_c7/f1p2/3835     | gnl BL_ORD_ID 12913      cb8564_c182049/f1p0/3195<br>isoform=cb8564_c182049;full_length_coverage=1;non_full_length_coverage=0;isoform_length=3195;expected_accuracy=0.997                                                  | 1   | 2344 | 2345 | 3021 | 1   | 2360 | 2516 | 319 | 5 |
| cb8564_c74541/f1p1/3268                                                                                                                        | gnl BL_ORD_ID 66399 cb1837_c9/f1p1/3972                                                                                                                                                                                    | 170 | 3792 | 1    | 169  | 298 | 3923 | 21   | 189 |   |
| isoform=cb8564_c74541;full_length_coverage=1;non_full_length_coverage=1;isoform_length=3268;expected_accuracy=0.992<br>cb8564_c72349/f1p0/3248 | gnl BL_ORD_ID 57975 cb8564_c85634/f1p0/3815<br><br>gnl BL_ORD_ID 14019      cb8564_c39824/f1p0/3319<br>isoform=cb8564_c39824;full_length_coverage=1;non_full_length_coverage=0;isoform_length=3319;expected_accuracy=1.000 | 601 | 3268 | 8    | 597  | 813 | 3488 | 6    | 597 |   |
| cb8564_c41690/f1p1/3409                                                                                                                        | gnl BL_ORD_ID 55939 cb8564_c49630/f1p4/3487                                                                                                                                                                                | 2   | 2920 | 2920 | 3170 | 1   | 2913 | 3243 | 349 | 3 |
| cb3101_c12/f1p3/3007                                                                                                                           | gnl BL_ORD_ID 69128 cb3101_c14/f1p0/3479                                                                                                                                                                                   | 13  | 1950 | 1946 | 2932 | 3   | 1939 | 2235 | 321 | 9 |

|                                                                                                                                                                   |                                                                                                                                                                                                                                |     |      |      |      |      |          |      |          |
|-------------------------------------------------------------------------------------------------------------------------------------------------------------------|--------------------------------------------------------------------------------------------------------------------------------------------------------------------------------------------------------------------------------|-----|------|------|------|------|----------|------|----------|
| racy=0.993<br>cb850_c28/f1p0/3553<br>isoform=cb850_c28;full_length_coverage=1;non_full_length_coverage=0;isoform_length=3553;expected_accuracy=0.992              | gnl BL_ORD_ID 52431 cb850_c22/f1p0/4086                                                                                                                                                                                        | 303 | 3520 | 1    | 307  | 709  | 390<br>5 | 263  | 568      |
| cb2369_c2/f1p0/3530<br>isoform=cb2369_c2;full_length_coverage=1;non_full_length_coverage=0;isoform_length=3530;expected_accuracy=0.994                            | gnl BL_ORD_ID 38850                      cb2369_c1/f1p0/3700<br>isoform=cb2369_c1;full_length_coverage=1;non_full_length_coverage=0;isoform_length=3700;expected_accuracy=0.995                                                | 109 | 2853 | 2851 | 3530 | 1    | 274<br>5 | 2874 | 355<br>1 |
| cb8564_c35300/f1p2/3912<br>cb1581_c3/f2p4/2456<br>isoform=cb1581_c3;full_length_coverage=2;non_full_length_coverage=4;isoform_length=2456;expected_accuracy=0.999 | gnl BL_ORD_ID 55865 cb8564_c47461/f1p0/4325<br>gnl BL_ORD_ID 28676                      cb1581_c9/f1p2/2552<br>isoform=cb1581_c9;full_length_coverage=1;non_full_length_coverage=2;isoform_length=2552;expected_accuracy=0.999 | 185 | 3827 | 1    | 186  | 318  | 396<br>0 | 1    | 186      |
| cb10054_c49/f1p1/1123<br>isoform=cb10054_c49;full_length_coverage=1;non_full_length_coverage=1;isoform_length=1123;expected_accuracy=1.000                        | gnl BL_ORD_ID 2389                      cb10054_c52/f1p2/1369<br>isoform=cb10054_c52;full_length_coverage=1;non_full_length_coverage=2;isoform_length=1369;expected_accuracy=0.997                                             | 250 | 2450 | 47   | 249  | 353  | 255<br>2 | 1    | 204      |
| cb8564_c4945/f1p0/1950<br>isoform=cb8564_c4945;full_length_coverage=1;non_full_length_coverage=0;isoform_length=1950;expected_accuracy=1.000                      | gnl BL_ORD_ID 16586                      cb8564_c4940/f1p0/2731<br>isoform=cb8564_c4940;full_length_coverage=1;non_full_length_coverage=0;isoform_length=2731;expected_accuracy=0.996                                          | 258 | 1123 | 48   | 262  | 498  | 136<br>3 | 101  | 317      |
| cb3183_c8/f1p3/3030<br>isoform=cb3183_c8;full_length_coverage=1;non_full_length_coverage=3;isoform_length=3030;expected_accuracy=0.993                            | gnl BL_ORD_ID 37887                      cb3183_c3/f2p4/3655<br>isoform=cb3183_c3;full_length_coverage=2;non_full_length_coverage=4;isoform_length=3655;expected_accuracy=0.993                                                | 969 | 1950 | 99   | 973  | 1751 | 273<br>1 | 89   | 962      |
|                                                                                                                                                                   |                                                                                                                                                                                                                                | 147 | 3030 | 1    | 148  | 774  | 365<br>5 | 202  | 349      |

|                                                                                                                                                             |                                                                 |      |      |      |      |      |      |      |      |
|-------------------------------------------------------------------------------------------------------------------------------------------------------------|-----------------------------------------------------------------|------|------|------|------|------|------|------|------|
| acy=0.999<br>cb8564_c42308/f1p5/3192<br>isoform=cb8564_c42308;full_length_coverage=1;non_full_length_coverage=5;isoform_length=3192;expected_accuracy=0.995 | cy=1.000<br>gnl BL_ORD_ID 55939 cb8564_c49630/f1p4/3487         | 11   | 2934 | 2934 | 3190 | 6    | 2913 | 3243 | 3497 |
| cb2629_c6/f1p0/4836<br>isoform=cb2629_c6;full_length_coverage=1;non_full_length_coverage=0;isoform_length=4836;expected_accuracy=0.993                      | gnl BL_ORD_ID 69477 cb18844_c1/f1p0/5518                        | 1    | 2925 | 2922 | 4812 | 167  | 3101 | 3266 | 5162 |
| cb5667_c26/f1p1/2495<br>isoform=cb5667_c26;full_length_coverage=1;non_full_length_coverage=1;isoform_length=2495;expected_accuracy=0.995                    | gnl BL_ORD_ID 74259 cb5667_c10/f1p0/2842                        | 1099 | 2487 | 1    | 1099 | 1356 | 2741 | 50   | 1148 |
| cb6532_c2/f1p0/2075<br>isoform=cb6532_c1;full_length_coverage=1;non_full_length_coverage=0;isoform_length=2254;expected_accuracy=0.992                      | gnl BL_ORD_ID 4405                      cb6532_c1/f1p0/2254     | 1    | 1306 | 1304 | 2064 | 34   | 1337 | 1478 | 2237 |
| cb16655_c3/f1p0/1854<br>isoform=cb16655_c3;full_length_coverage=1;non_full_length_coverage=0;isoform_length=1854;expected_accuracy=0.997                    | gnl BL_ORD_ID 10633                      cb8564_c1210/f1p0/2120 | 148  | 1786 | 11   | 148  | 479  | 2120 | 1    | 137  |
| cb4835_c1/f3p1/2340<br>isoform=cb4835_c1;full_length_coverage=3;non_full_length_coverage=1;isoform_length=2340;expected_accuracy=1.000                      | gnl BL_ORD_ID 72029 cb4835_c11/f1p0/2717                        | 1    | 1418 | 1413 | 2338 | 9    | 1423 | 1631 | 2556 |
| cb227_c14/f1p0/2789                                                                                                                                         | gnl BL_ORD_ID 37093                      cb227_c5/f1p0/3888     | 1    | 2438 | 2438 | 2745 | 82   | 252  | 2712 | 301  |

|                                                                                                                      |                                                                                                                     |      |      |      |      |      |      |      |  |      |
|----------------------------------------------------------------------------------------------------------------------|---------------------------------------------------------------------------------------------------------------------|------|------|------|------|------|------|------|--|------|
|                                                                                                                      | isoform=cb227_c5;full_length_coverage=1;non_full_length_coverage=0;isoform_length=3888;expected_accuracy=0.998      |      |      |      |      |      |      | 3    |  | 9    |
| cb8564_c165050/f2p1/2091                                                                                             | gnl BL_ORD_ID 14463      cb8564_c25154/f1p5/4276                                                                    |      |      |      |      |      |      |      |  |      |
| isoform=cb8564_c165050;full_length_coverage=2;non_full_length_coverage=1;isoform_length=2091;expected_accuracy=0.997 | isoform=cb8564_c25154;full_length_coverage=1;non_full_length_coverage=5;isoform_length=4276;expected_accuracy=0.995 | 271  | 2091 | 85   | 269  | 2418 | 4236 | 4    |  | 189  |
| cb3010_c5/f2p0/2793                                                                                                  | gnl BL_ORD_ID 38461      cb3010_c8/f1p0/2925                                                                        |      |      |      |      |      |      |      |  |      |
| isoform=cb3010_c5;full_length_coverage=2;non_full_length_coverage=0;isoform_length=2793;expected_accuracy=1.000      | isoform=cb3010_c8;full_length_coverage=1;non_full_length_coverage=0;isoform_length=2925;expected_accuracy=0.998     | 1189 | 2793 | 1    | 1190 | 1304 | 2908 | 1    |  | 1190 |
| cb8564_c42814/f1p0/2151                                                                                              | gnl BL_ORD_ID 15229      cb8564_c40059/f1p0/3005                                                                    |      |      |      |      |      |      |      |  |      |
| isoform=cb8564_c42814;full_length_coverage=1;non_full_length_coverage=0;isoform_length=2151;expected_accuracy=0.993  | isoform=cb8564_c40059;full_length_coverage=1;non_full_length_coverage=0;isoform_length=3005;expected_accuracy=0.991 | 650  | 2151 | 7    | 652  | 1495 | 3003 | 1    |  | 678  |
| cb2527_c31/f1p1/3358                                                                                                 | gnl BL_ORD_ID 68590      cb2527_c17/f1p1/3542                                                                       |      |      |      |      |      |      |      |  |      |
|                                                                                                                      | gnl BL_ORD_ID 5637      cb6548_c10/f1p1/2515                                                                        |      |      |      |      |      |      |      |  |      |
| cb6548_c8/f1p0/2532                                                                                                  | isoform=cb6548_c10;full_length_coverage=1;non_full_length_coverage=1;isoform_length=2515;expected_accuracy=0.991    | 265  | 2327 | 58   | 267  | 451  | 2515 | 1    |  | 210  |
| cb18339_c0/f1p1/1860                                                                                                 |                                                                                                                     |      |      |      |      |      |      |      |  |      |
| isoform=cb18339_c0;full_length_coverage=1;non_full_length_coverage=1;isoform_length=1860;expected_accuracy=0.999     | gnl BL_ORD_ID 47594      cb6602_c12/f1p0/2867                                                                       | 291  | 1838 | 8    | 295  | 485  | 2034 | 1    |  | 280  |
| cb8564_c90410/f1p0/3234                                                                                              | gnl BL_ORD_ID 15394      cb8564_c24855/f2p0/3424                                                                    | 1    | 2091 | 2090 | 3200 | 104  | 219  | 2315 |  | 342  |



|                          |                                                                                                                                                                           |     |      |      |      |      |          |      |          |
|--------------------------|---------------------------------------------------------------------------------------------------------------------------------------------------------------------------|-----|------|------|------|------|----------|------|----------|
|                          | isoform=cb8564_c24855;full_length_coverage=2;non_full_length_coverage=0;isoform_length=3424;expected_accuracy=0.999                                                       |     |      |      |      |      |          | 0    | 4        |
| cb8564_c122951/f1p0/3293 | gnl BL_ORD_ID 12327      cb8564_c123675/f1p1/3399<br>isoform=cb8564_c123675;full_length_coverage=1;non_full_length_coverage=1;isoform_length=3399;expected_accuracy=0.995 | 2   | 2591 | 2589 | 3041 | 157  | 274<br>4 | 2931 | 338<br>1 |
| cb4128_c14/f1p1/2357     | gnl BL_ORD_ID 40767      cb4128_c10/f3p1/2897<br>isoform=cb4128_c10;full_length_coverage=3;non_full_length_coverage=1;isoform_length=2897;expected_accuracy=0.998         | 546 | 2341 | 64   | 549  | 1052 | 284<br>7 | 3    | 487      |
| cb1626_c15/f1p0/2204     | isoform=cb1626_c15;full_length_coverage=1;non_full_length_coverage=0;isoform_length=2204;expected_accuracy=0.998                                                          |     |      |      |      |      |          |      |          |
|                          | gnl BL_ORD_ID 63808      cb1626_c17/f1p0/3006                                                                                                                             | 1   | 1096 | 1093 | 2154 | 1    | 109<br>1 | 1919 | 297<br>6 |
| cb8564_c181074/f1p0/2725 | isoform=cb8564_c181074;full_length_coverage=1;non_full_length_coverage=0;isoform_length=2725;expected_accuracy=1.000                                                      |     |      |      |      |      |          |      |          |
|                          | gnl BL_ORD_ID 56772      cb8564_c71057/f1p4/4091                                                                                                                          | 148 | 2725 | 1    | 147  | 1498 | 408<br>0 | 12   | 154      |
| cb6609_c8/f1p0/2192      | gnl BL_ORD_ID 3768      cb6609_c2/f1p0/2814<br>isoform=cb6609_c2;full_length_coverage=1;non_full_length_coverage=0;isoform_length=2814;expected_accuracy=0.999            | 239 | 1956 | 29   | 243  | 917  | 263<br>3 | 1    | 213      |
| cb5773_c11/f1p0/2633     | gnl BL_ORD_ID 46836      cb5773_c0/f8p0/2821<br>isoform=cb5773_c0;full_length_coverage=8;non_full_length_coverage=0;isoform_length=2821;expected_accuracy=0.999           | 1   | 1756 | 1754 | 2631 | 1    | 175<br>9 | 1944 | 282<br>1 |

|                                                                                                                                                |                                                                                                                                                                    |     |      |      |      |      |     |      |     |   |
|------------------------------------------------------------------------------------------------------------------------------------------------|--------------------------------------------------------------------------------------------------------------------------------------------------------------------|-----|------|------|------|------|-----|------|-----|---|
| racy=0.995                                                                                                                                     | cy=1.000                                                                                                                                                           |     |      |      |      |      |     |      |     |   |
| cb808_c3/flp0/3813                                                                                                                             | gnl BL_ORD_ID 50993 cb808_c1/flp0/4621                                                                                                                             | 1   | 2545 | 2543 | 3568 | 89   | 263 | 3609 | 463 | 3 |
| cb18456_c6530/flp0/1200                                                                                                                        | gnl BL_ORD_ID 53228 cb8564_c119430/flp0/1961                                                                                                                       | 260 | 1166 | 3    | 259  | 799  | 170 | 12   | 268 | 5 |
| cb8564_c40978/flp0/3073                                                                                                                        | gnl BL_ORD_ID 16172 cb8564_c53024/flp0/3159<br>isoform=cb8564_c53024;full_length_coverage=1;non_full_length_coverage=0;isoform_length=3159;expected_accuracy=0.996 | 1   | 1711 | 1708 | 2850 | 1    | 169 | 2017 | 315 | 8 |
| cb11589_c0/flp0/1162                                                                                                                           | gnl BL_ORD_ID 60276 cb11589_c1/flp0/2770                                                                                                                           | 131 | 1138 | 3    | 134  | 1724 | 272 | 734  | 865 | 7 |
| cb1176_c32/flp0/3993                                                                                                                           | gnl BL_ORD_ID 22295 cb1176_c4/flp0/4212<br>isoform=cb1176_c4;full_length_coverage=1;non_full_length_coverage=0;isoform_length=4212;expected_accuracy=0.997         | 111 | 3923 | 1    | 112  | 374  | 418 | 24   | 135 | 4 |
| cb8564_c83489/flp1/2514<br>isoform=cb8564_c83489;full_length_coverage=1;non_full_length_coverage=1;isoform_length=2514;expected_accuracy=0.995 | gnl BL_ORD_ID 18587 cb8564_c84653/f6p1/2944<br>isoform=cb8564_c84653;full_length_coverage=6;non_full_length_coverage=1;isoform_length=2944;expected_accuracy=0.994 | 342 | 2514 | 5    | 347  | 553  | 272 | 1    | 343 | 9 |
| cb8564_c53654/f2p0/3797<br>isoform=cb8564_c53654;full_length_coverage=2;non_full_length_coverage=0;isoform_length=3797;expected_accuracy=0.996 | gnl BL_ORD_ID 55975 cb8564_c50843/flp0/4165                                                                                                                        | 2   | 3272 | 3271 | 3761 | 8    | 325 | 3639 | 413 | 2 |
| cb6548_c12/flp1/2464                                                                                                                           | gnl BL_ORD_ID 5637 cb6548_c10/flp1/2515<br>isoform=cb6548_c10;full_length_coverage=1;non_full_length_coverage=1;isoform_length=2515;expected_accuracy=0.996        | 259 | 2427 | 52   | 260  | 345  | 251 | 1    | 209 | 5 |

|                          |                                                                                                                                                                                            |      |      |      |      |      |      |      |      |
|--------------------------|--------------------------------------------------------------------------------------------------------------------------------------------------------------------------------------------|------|------|------|------|------|------|------|------|
| cb938_c15/f1p0/3219      | acy=0.991<br>gnl BL_ORD_ID 21148                      cb938_c6/f2p5/3513<br>isoform=cb938_c6;full_length_coverage=2;non_full_length_coverage=5;isoform_length=3513;expected_accuracy=1.000 | 1    | 2546 | 2541 | 3188 | 1    | 2548 | 2824 | 3471 |
| cb4706_c4/f1p0/1315      | isoform=cb4706_c4;full_length_coverage=1;non_full_length_coverage=0;isoform_length=1315;expected_accuracy=0.995<br>gnl BL_ORD_ID 71982   cb4706_c2/f1p0/1537                               | 1    | 1019 | 1018 | 1315 | 4    | 1023 | 1156 | 1455 |
| cb9427_c6/f1p0/2067      | gnl BL_ORD_ID 20412                      cb9427_c3/f1p0/2379<br>isoform=cb9427_c6;full_length_coverage=1;non_full_length_coverage=0;isoform_length=2067;expected_accuracy=0.994            | 881  | 2067 | 97   | 882  | 1148 | 2336 | 1    | 783  |
| cb7023_c6/f1p0/1630      | gnl BL_ORD_ID 47818   cb7023_c7/f1p0/1690                                                                                                                                                  | 129  | 1564 | 1    | 129  | 258  | 1693 | 10   | 138  |
| cb1952_c4/f5p0/2247      | isoform=cb1952_c4;full_length_coverage=5;non_full_length_coverage=0;isoform_length=2247;expected_accuracy=1.000<br>gnl BL_ORD_ID 66522   cb1952_c18/f1p0/2527                              | 1    | 2025 | 2022 | 2194 | 21   | 2057 | 2196 | 2366 |
| cb4579_c3/f1p0/2979      | gnl BL_ORD_ID 42018                      cb4579_c0/f2p0/3304<br>isoform=cb4579_c0;full_length_coverage=2;non_full_length_coverage=0;isoform_length=3304;expected_accuracy=1.000            | 1243 | 2872 | 1    | 1246 | 1677 | 3304 | 71   | 1316 |
| cb8564_c125514/f1p0/2141 | gnl BL_ORD_ID 54874   cb8564_c3238/f1p0/2188                                                                                                                                               | 361  | 1947 | 4    | 361  | 507  | 2093 | 9    | 366  |
| cb3939_c29/f1p0/2382     | gnl BL_ORD_ID 39238                      cb3939_c10/f3p0/3353                                                                                                                              | 1208 | 2324 | 101  | 1209 | 2181 | 329  | 108  | 121  |

|                                                                                                                      |                                                                                                                      |     |      |      |      |      |      |      |      |
|----------------------------------------------------------------------------------------------------------------------|----------------------------------------------------------------------------------------------------------------------|-----|------|------|------|------|------|------|------|
|                                                                                                                      | isoform=cb3939_c10;full_length_coverage=3;non_full_length_coverage=0;isoform_length=3353;expected_accuracy=0.998     |     |      |      |      |      |      | 7    | 6    |
| cb3580_c20/f2p2/2486                                                                                                 | gnl BL_ORD_ID 40393                      cb3580_c24/f1p0/3582                                                        |     |      |      |      |      |      |      |      |
| isoform=cb3580_c20;full_length_coverage=2;non_full_length_coverage=2;isoform_length=2486;expected_accuracy=0.997     | isoform=cb3580_c24;full_length_coverage=1;non_full_length_coverage=0;isoform_length=3582;expected_accuracy=0.992     | 179 | 2414 | 1    | 183  | 1337 | 3567 | 765  | 948  |
| cb12424_c19/f1p0/1100                                                                                                | gnl BL_ORD_ID 61720   cb12424_c18/f1p0/1829                                                                          | 203 | 1009 | 28   | 207  | 770  | 1576 | 33   | 212  |
| cb8564_c14964/f3p2/2488                                                                                              |                                                                                                                      |     |      |      |      |      |      |      |      |
| isoform=cb8564_c14964;full_length_coverage=3;non_full_length_coverage=2;isoform_length=2488;expected_accuracy=0.995  | gnl BL_ORD_ID 52423   cb8564_c122458/f1p0/2664                                                                       | 1   | 2156 | 2155 | 2487 | 1    | 2157 | 2310 | 2642 |
| cb8564_c10938/f1p1/2321                                                                                              | gnl BL_ORD_ID 54156   cb8564_c19563/f1p0/4354                                                                        | 1   | 1315 | 1310 | 2292 | 1318 | 2632 | 2751 | 3733 |
| cb8564_c87256/f1p0/2285                                                                                              | gnl BL_ORD_ID 16094                      cb8564_c72701/f1p0/2931                                                     |     |      |      |      |      |      |      |      |
| isoform=cb8564_c87256;full_length_coverage=1;non_full_length_coverage=0;isoform_length=2285;expected_accuracy=0.992  | isoform=cb8564_c72701;full_length_coverage=1;non_full_length_coverage=0;isoform_length=2931;expected_accuracy=0.996  | 1   | 1703 | 1700 | 2270 | 515  | 2221 | 2355 | 2931 |
| cb8564_c176017/f8p2/2488                                                                                             | gnl BL_ORD_ID 10848                      cb8564_c112467/f1p0/3061                                                    |     |      |      |      |      |      |      |      |
| isoform=cb8564_c176017;full_length_coverage=8;non_full_length_coverage=2;isoform_length=2488;expected_accuracy=1.000 | isoform=cb8564_c112467;full_length_coverage=1;non_full_length_coverage=0;isoform_length=3061;expected_accuracy=0.994 | 1   | 1875 | 1874 | 2417 | 1    | 1846 | 2518 | 3061 |
| cb6348_c12/f4p0/1764                                                                                                 | gnl BL_ORD_ID 4828                      cb6348_c4/f1p0/2643                                                          |     |      |      |      |      |      |      |      |
| isoform=cb6348_c12;full_length_coverage=4;non_full_length_coverage=0;isoform_length=1764;expected_accuracy=0.997     | isoform=cb6348_c4;full_length_coverage=1;non_full_length_coverage=0;isoform_length=2643;expected_accuracy=0.997      | 1   | 1103 | 1099 | 1764 | 15   | 1121 | 1952 | 2618 |

|                                                                                                                                                                |                                                                                                                                                                                     |      |      |      |      |      |      |      |      |
|----------------------------------------------------------------------------------------------------------------------------------------------------------------|-------------------------------------------------------------------------------------------------------------------------------------------------------------------------------------|------|------|------|------|------|------|------|------|
| racy=0.998<br>cb8564_c178653/f1p0/2779<br>isoform=cb8564_c178653;full_length_coverage=1;non_full_length_coverage=0;isoform_length=2779;expected_accuracy=0.994 | cy=0.999<br>gnl BL_ORD_ID 16795      cb8564_c73428/f1p0/2966<br>isoform=cb8564_c73428;full_length_coverage=1;non_full_length_coverage=0;isoform_length=2966;expected_accuracy=0.994 | 1    | 2179 | 2177 | 2779 | 7    | 2180 | 2338 | 2937 |
| cb2155_c11/f1p0/2668<br>isoform=cb2155_c11;full_length_coverage=1;non_full_length_coverage=0;isoform_length=2668;expected_accuracy=1.000                       | gnl BL_ORD_ID 35418      cb2155_c26/f5p0/2830<br>isoform=cb2155_c26;full_length_coverage=5;non_full_length_coverage=0;isoform_length=2830;expected_accuracy=1.000                   | 1    | 2105 | 2106 | 2668 | 38   | 2135 | 2253 | 2805 |
| cb3576_c2/f1p0/3257<br>isoform=cb3576_c2;full_length_coverage=1;non_full_length_coverage=0;isoform_length=3257;expected_accuracy=0.997                         | gnl BL_ORD_ID 41240      cb3576_c1/f1p0/3587<br>isoform=cb3576_c1;full_length_coverage=1;non_full_length_coverage=0;isoform_length=3587;expected_accuracy=0.995                     | 1    | 1704 | 1703 | 3257 | 15   | 1719 | 1898 | 3451 |
| cb8564_c49958/f1p0/3088<br>isoform=cb8564_c49958;full_length_coverage=1;non_full_length_coverage=0;isoform_length=3088;expected_accuracy=0.995                 | gnl BL_ORD_ID 55804      cb8564_c38892/f1p1/3313                                                                                                                                    | 1353 | 3080 | 1    | 1355 | 1481 | 3206 | 1    | 1356 |
| cb3387_c4/f1p0/2366<br>isoform=cb3387_c4;full_length_coverage=1;non_full_length_coverage=0;isoform_length=2366;expected_accuracy=0.997                         | gnl BL_ORD_ID 70355      cb3387_c7/f1p0/3232                                                                                                                                        | 1    | 1821 | 1818 | 2341 | 74   | 1895 | 2683 | 3205 |
| cb8564_c33702/f1p6/2850<br>isoform=cb8564_c33702;full_length_coverage=1;non_full_length_coverage=6;isoform_length=2850;expected_accuracy=0.993                 | gnl BL_ORD_ID 56029      cb8564_c52782/f1p2/3327                                                                                                                                    | 236  | 2848 | 1    | 236  | 617  | 3236 | 1    | 225  |
| cb16807_c2/f1p0/1293                                                                                                                                           | gnl BL_ORD_ID 9869      cb8564_c109825/f2p0/2137                                                                                                                                    | 233  | 1272 | 5    | 233  | 1098 | 213  | 10   | 238  |

|                                                                                                                      |                                                                                                                      |                          |     |      |      |      |      |     |      |     |   |   |
|----------------------------------------------------------------------------------------------------------------------|----------------------------------------------------------------------------------------------------------------------|--------------------------|-----|------|------|------|------|-----|------|-----|---|---|
|                                                                                                                      | isoform=cb8564_c109825;full_length_coverage=2;non_full_length_coverage=0;isoform_length=2137;expected_accuracy=0.995 |                          |     |      |      |      |      |     |      | 7   |   |   |
| cb6090_c0/f5p0/2362                                                                                                  | gnl BL_ORD_ID 44623                                                                                                  | cb6090_c1/f1p0/2937      |     |      |      |      |      |     |      |     |   |   |
| isoform=cb6090_c0;full_length_coverage=5;non_full_length_coverage=0;isoform_length=2362;expected_accuracy=1.000      | isoform=cb6090_c1;full_length_coverage=1;non_full_length_coverage=0;isoform_length=2937;expected_accuracy=0.997      |                          | 1   | 1688 | 1686 | 2360 | 1    | 168 | 2265 | 293 | 6 | 7 |
| cb8564_c131385/f1p1/2665                                                                                             | gnl BL_ORD_ID 54560                                                                                                  | cb8564_c126417/f1p0/2804 |     |      |      |      |      |     |      |     |   |   |
| isoform=cb8564_c131385;full_length_coverage=1;non_full_length_coverage=1;isoform_length=2665;expected_accuracy=0.996 | isoform=cb8564_c126417;full_length_coverage=1;non_full_length_coverage=1;isoform_length=2804;expected_accuracy=0.996 |                          | 1   | 1724 | 1722 | 2665 | 2    | 172 | 1830 | 277 | 5 | 3 |
| cb8564_c74375/f1p1/2718                                                                                              | gnl BL_ORD_ID 57029                                                                                                  | cb8564_c81055/f1p0/3110  |     |      |      |      |      |     |      |     |   |   |
| isoform=cb8564_c74375;full_length_coverage=1;non_full_length_coverage=1;isoform_length=2718;expected_accuracy=1.000  | isoform=cb8564_c81055;full_length_coverage=1;non_full_length_coverage=1;isoform_length=3110;expected_accuracy=1.000  |                          | 1   | 1609 | 1608 | 2718 | 132  | 174 | 1853 | 296 | 4 | 2 |
| cb396_c42/f1p0/2343                                                                                                  | gnl BL_ORD_ID 39231                                                                                                  | cb396_c67/f28p0/2542     |     |      |      |      |      |     |      |     |   |   |
| isoform=cb396_c42;full_length_coverage=1;non_full_length_coverage=0;isoform_length=2343;expected_accuracy=1.000      | isoform=cb396_c67;full_length_coverage=28;non_full_length_coverage=0;isoform_length=2542;expected_accuracy=1.000     |                          | 1   | 1458 | 1457 | 2346 | 7    | 146 | 1635 | 252 | 5 | 4 |
| cb8564_c41756/f1p0/2738                                                                                              | gnl BL_ORD_ID 17161                                                                                                  | cb8564_c87466/f1p1/3006  |     |      |      |      |      |     |      |     |   |   |
| isoform=cb8564_c41756;full_length_coverage=1;non_full_length_coverage=0;isoform_length=2738;expected_accuracy=0.996  | isoform=cb8564_c87466;full_length_coverage=1;non_full_length_coverage=1;isoform_length=3006;expected_accuracy=0.994  |                          | 1   | 2173 | 2170 | 2738 | 1    | 219 | 2321 | 290 | 6 | 0 |
| cb4444_c24/f1p1/1945                                                                                                 | gnl BL_ORD_ID 43663                                                                                                  | cb4444_c8/f1p0/2558      |     |      |      |      |      |     |      |     |   |   |
| isoform=cb4444_c24;full_length_coverage=1;non_full_length_coverage=0;isoform_length=1945;expected_accuracy=1.000     | isoform=cb4444_c8;full_length_coverage=1;non_full_length_coverage=0;isoform_length=2558;expected_accuracy=1.000      |                          | 592 | 1943 | 6    | 592  | 1068 | 240 | 1    | 583 | 5 |   |

|                         |                                                                                                                                                                                       |      |      |      |      |      |      |      |      |
|-------------------------|---------------------------------------------------------------------------------------------------------------------------------------------------------------------------------------|------|------|------|------|------|------|------|------|
| cb8564_c15653/f1p4/2475 | cy=0.994<br>gnl BL_ORD_ID 10640      cb8564_c100234/f2p5/2744<br>isoform=cb8564_c100234;full_length_coverage=2;non_full_length_coverage=5;isoform_length=2744;expected_accuracy=0.993 | 15   | 2293 | 2289 | 2482 | 38   | 2318 | 2537 | 2734 |
| cb8564_c21439/f1p0/2587 | gnl BL_ORD_ID 57311      cb8564_c89547/f1p0/2973                                                                                                                                      | 1226 | 2572 | 1    | 1228 | 1441 | 2787 | 91   | 1320 |
| cb5564_c21/f1p0/1889    | gnl BL_ORD_ID 45842      cb5564_c9/f1p0/2154<br>isoform=cb5564_c9;full_length_coverage=1;non_full_length_coverage=0;isoform_length=2154;expected_accuracy=0.992                       | 355  | 1872 | 46   | 359  | 619  | 2137 | 67   | 380  |
| cb2430_c25/f5p0/2633    | gnl BL_ORD_ID 38549      cb2430_c6/f1p0/3031<br>isoform=cb2430_c6;full_length_coverage=1;non_full_length_coverage=0;isoform_length=3031;expected_accuracy=0.998                       | 1    | 1837 | 1835 | 2632 | 1    | 1832 | 2239 | 3031 |
| cb2747_c0/f11p2/3395    | gnl BL_ORD_ID 68803      cb2747_c3/f1p0/3786<br>isoform=cb2747_c0;full_length_coverage=11;non_full_length_coverage=2;isoform_length=3395;expected_accuracy=1.000                      | 19   | 2335 | 2331 | 3304 | 4    | 2320 | 2741 | 3714 |
| cb8564_c83196/f1p0/2505 | gnl BL_ORD_ID 57277      cb8564_c88819/f1p0/3550<br>isoform=cb8564_c83196;full_length_coverage=1;non_full_length_coverage=0;isoform_length=2505;expected_accuracy=0.995               | 1    | 1642 | 1642 | 2485 | 945  | 2587 | 2700 | 3543 |
| cb12389_c6/f9p1/1860    | gnl BL_ORD_ID 20471      cb9943_c3/f1p0/2123<br>isoform=cb12389_c6;full_length_coverage=9;non_full_length_coverage=1;isoform_length=1860;expected_accuracy=1.000                      | 1    | 1490 | 1487 | 1812 | 8    | 1498 | 1798 | 2123 |

|                                                                                                                                                        |                                                                                                                                                                                             |      |      |      |      |      |          |      |          |
|--------------------------------------------------------------------------------------------------------------------------------------------------------|---------------------------------------------------------------------------------------------------------------------------------------------------------------------------------------------|------|------|------|------|------|----------|------|----------|
| racy=0.995<br>cb2640_c12/f1p0/3046<br>isoform=cb2640_c12;full_length_coverage=1;non_full_length_coverage=0;isoform_length=3046;expected_accuracy=0.994 | cy=0.999<br>gnl BL_ORD_ID 39029                      cb2640_c3/f2p1/3206<br>isoform=cb2640_c3;full_length_coverage=2;non_full_length_coverage=1;isoform_length=3206;expected_accuracy=0.998 | 192  | 3046 | 1    | 193  | 334  | 318<br>4 | 16   | 207      |
| cb9100_c7/f1p0/2182                                                                                                                                    | gnl BL_ORD_ID 20675                      cb9100_c8/f1p0/2665<br>isoform=cb9100_c8;full_length_coverage=1;non_full_length_coverage=0;isoform_length=2665;expected_accuracy=0.998             | 19   | 1934 | 1931 | 2182 | 20   | 193<br>4 | 2413 | 266<br>4 |
| cb8564_c81333/f1p0/2975                                                                                                                                | gnl BL_ORD_ID 13635                      cb8564_c21316/f1p2/2982<br>isoform=cb8564_c21316;full_length_coverage=1;non_full_length_coverage=2;isoform_length=2982;expected_accuracy=0.997     | 1    | 1864 | 1863 | 2700 | 115  | 197<br>8 | 2146 | 298<br>2 |
| cb10304_c5/f1p0/1455<br>isoform=cb10304_c5;full_length_coverage=1;non_full_length_coverage=0;isoform_length=1455;expected_accuracy=1.000               | gnl BL_ORD_ID 2572                      cb10304_c8/f3p0/1648<br>isoform=cb10304_c8;full_length_coverage=3;non_full_length_coverage=0;isoform_length=1648;expected_accuracy=0.994            | 1    | 1333 | 1328 | 1455 | 5    | 133<br>7 | 1522 | 164<br>8 |
| cb1772_c11/f1p0/3842<br>isoform=cb1772_c11;full_length_coverage=1;non_full_length_coverage=0;isoform_length=3842;expected_accuracy=0.994               | gnl BL_ORD_ID 63938   cb1772_c19/f1p0/4042                                                                                                                                                  | 285  | 3814 | 2    | 286  | 441  | 397<br>0 | 4    | 307      |
| cb1573_c16/f1p0/3454<br>isoform=cb1573_c16;full_length_coverage=1;non_full_length_coverage=0;isoform_length=3454;expected_accuracy=0.998               | gnl BL_ORD_ID 30372                      cb1573_c3/f4p1/3618<br>isoform=cb1573_c3;full_length_coverage=4;non_full_length_coverage=1;isoform_length=3618;expected_accuracy=0.996             | 1249 | 3363 | 1    | 1252 | 1497 | 361<br>8 | 85   | 133<br>8 |
| cb7214_c10/f1p0/1871                                                                                                                                   | gnl BL_ORD_ID 8880                      cb7214_c4/f1p0/2395                                                                                                                                 | 134  | 1878 | 1    | 136  | 650  | 239      | 21   | 156      |



|                          |                                                                                                                                                                                       |      |      |      |      |      |      |      |      |  |
|--------------------------|---------------------------------------------------------------------------------------------------------------------------------------------------------------------------------------|------|------|------|------|------|------|------|------|--|
|                          | isoform=cb7214_c4;full_length_coverage=1;non_full_length_coverage=0;isoform_length=2395;expected_accuracy=0.999                                                                       |      |      |      |      |      |      |      | 5    |  |
| cb3411_c39/f1p2/3337     | gnl BL_ORD_ID 40175                      cb3411_c12/f1p0/3570<br>isoform=cb3411_c12;full_length_coverage=1;non_full_length_coverage=0;isoform_length=3570;expected_accuracy=0.995     | 273  | 3239 | 1    | 274  | 608  | 3570 | 42   | 316  |  |
| cb9157_c9/f1p0/1707      | gnl BL_ORD_ID 19853                      cb9157_c6/f1p0/2119<br>isoform=cb9157_c9;full_length_coverage=1;non_full_length_coverage=0;isoform_length=1707;expected_accuracy=0.996       | 1    | 1330 | 1327 | 1707 | 102  | 1429 | 1571 | 1951 |  |
| cb1016_c1/f2p1/1266      | gnl BL_ORD_ID 47223                      cb1016_c4/f1p1/2801<br>isoform=cb1016_c1;full_length_coverage=2;non_full_length_coverage=1;isoform_length=1266;expected_accuracy=1.000       | 1    | 1008 | 1007 | 1266 | 99   | 1106 | 2409 | 2668 |  |
| cb90_c4/f2p0/4575        | gnl BL_ORD_ID 57571                      cb90_c32/f1p0/4642<br>isoform=cb90_c4;full_length_coverage=2;non_full_length_coverage=0;isoform_length=4575;expected_accuracy=0.999          | 1615 | 4574 | 114  | 1618 | 1731 | 4690 | 102  | 1605 |  |
| cb12513_c62/f1p0/1798    | gnl BL_ORD_ID 14254                      cb8564_c3885/f1p7/2735<br>isoform=cb8564_c3885;full_length_coverage=1;non_full_length_coverage=7;isoform_length=2735;expected_accuracy=0.999 | 294  | 1539 | 38   | 295  | 1490 | 2735 | 17   | 274  |  |
| cb8564_c135684/f4p2/3618 | gnl BL_ORD_ID 57396                      cb8564_c91806/f1p1/3620<br>isoform=cb8564_c135684;full_length_coverage=4;non_full_length_coverage=2;isoform_length=3618;expected             | 1    | 2743 | 2741 | 3468 | 1    | 2745 | 2895 | 3622 |  |

|                        |                                                                                                                                                                        |      |      |      |      |      |      |      |     |   |
|------------------------|------------------------------------------------------------------------------------------------------------------------------------------------------------------------|------|------|------|------|------|------|------|-----|---|
| _accuracy=0.996        |                                                                                                                                                                        |      |      |      |      |      |      |      |     |   |
| cb13515_c9/f1p0/1348   | gnl BL_ORD_ID 26579      cb13515_c1/f2p1/1462<br>isoform=cb13515_c1;full_length_coverage=2;non_full_length_coverage=1;isoform_length=1462;expected_accuracy=1.000      | 1    | 1117 | 1114 | 1295 | 62   | 1173 | 1282 | 146 | 2 |
| cb6430_c3/f1p1/2522    | gnl BL_ORD_ID 49714      cb6430_c2/f1p0/2694                                                                                                                           | 2    | 2071 | 2068 | 2463 | 2    | 2098 | 2286 | 268 | 1 |
| cb322_c15/f1p0/3487    | gnl BL_ORD_ID 70802      cb322_c34/f1p0/3998<br>isoform=cb322_c15;full_length_coverage=1;non_full_length_coverage=0;isoform_length=3487;expected_accuracy=0.997        | 17   | 2729 | 2728 | 3487 | 1    | 2717 | 3203 | 396 | 2 |
| cb998_c6/f1p0/3781     | gnl BL_ORD_ID 67910      cb18641_c0/f1p0/4940<br>isoform=cb998_c6;full_length_coverage=1;non_full_length_coverage=0;isoform_length=3781;expected_accuracy=0.995        | 1682 | 3781 | 16   | 1687 | 2393 | 4496 | 1    | 167 | 7 |
| cb8564_c2323/f1p0/2212 | gnl BL_ORD_ID 14025      cb8564_c31262/f7p4/2729<br>isoform=cb8564_c2323;full_length_coverage=1;non_full_length_coverage=0;isoform_length=2212;expected_accuracy=0.995 | 1    | 1320 | 1316 | 2212 | 139  | 1458 | 1737 | 263 | 4 |
| cb12047_c134/f1p0/1727 | gnl BL_ORD_ID 54402      cb8564_c34765/f1p1/1931<br>isoform=cb12047_c134;full_length_coverage=1;non_full_length_coverage=0;isoform_length=1727;expected_accuracy=0.999 | 1    | 1006 | 1001 | 1727 | 1    | 1006 | 1112 | 183 | 8 |
| cb12189_c18/f1p5/1510  | gnl BL_ORD_ID 60618      cb12189_c37/f1p0/1873<br>isoform=cb12189_c18;full_length_coverage=1;non_full_length_coverage=5;isoform_length=1510;expected_acc               | 556  | 1505 | 6    | 560  | 788  | 1732 | 1    | 556 |   |

|                                                                                                                     |                                                                                                                      |                          |     |      |      |      |      |      |      |      |
|---------------------------------------------------------------------------------------------------------------------|----------------------------------------------------------------------------------------------------------------------|--------------------------|-----|------|------|------|------|------|------|------|
| accuracy=0.991                                                                                                      |                                                                                                                      |                          |     |      |      |      |      |      |      |      |
| cb5622_c4/f1p0/1701                                                                                                 | gnl BL_ORD_ID 74169                                                                                                  | cb5622_c2/f1p0/2496      | 1   | 1188 | 1188 | 1567 | 31   | 1217 | 2011 | 2390 |
| cb8564_c40764/f1p0/2563                                                                                             | gnl BL_ORD_ID 11225                                                                                                  | cb8564_c150144/f1p7/2784 |     |      |      |      |      |      |      |      |
| isoform=cb8564_c40764;full_length_coverage=1;non_full_length_coverage=0;isoform_length=2563;expected_accuracy=0.997 | isoform=cb8564_c150144;full_length_coverage=1;non_full_length_coverage=7;isoform_length=2784;expected_accuracy=0.991 |                          | 1   | 2166 | 2162 | 2563 | 2    | 2164 | 2371 | 2773 |
| cb13515_c9/f1p0/1348                                                                                                | gnl BL_ORD_ID 26398                                                                                                  | cb13515_c13/f4p0/1446    |     |      |      |      |      |      |      |      |
|                                                                                                                     | isoform=cb13515_c13;full_length_coverage=4;non_full_length_coverage=0;isoform_length=1446;expected_accuracy=0.993    |                          | 1   | 1117 | 1114 | 1318 | 18   | 1133 | 1242 | 1446 |
| cb8564_c36774/f1p0/2756                                                                                             |                                                                                                                      |                          |     |      |      |      |      |      |      |      |
| isoform=cb8564_c36774;full_length_coverage=1;non_full_length_coverage=0;isoform_length=2756;expected_accuracy=0.990 | gnl BL_ORD_ID 55187                                                                                                  | cb8564_c34994/f1p0/3482  | 145 | 2756 | 1    | 145  | 881  | 3500 | 152  | 295  |
| cb12_c30/f1p2/4443                                                                                                  |                                                                                                                      |                          |     |      |      |      |      |      |      |      |
| isoform=cb12_c30;full_length_coverage=1;non_full_length_coverage=2;isoform_length=4443;expected_accuracy=0.992      | gnl BL_ORD_ID 61091                                                                                                  | cb12_c58/f1p0/5377       | 369 | 4256 | 1    | 373  | 1404 | 5292 | 73   | 450  |
| cb6360_c2/f2p1/2193                                                                                                 |                                                                                                                      |                          |     |      |      |      |      |      |      |      |
| isoform=cb6360_c2;full_length_coverage=2;non_full_length_coverage=1;isoform_length=2193;expected_accuracy=0.995     | gnl BL_ORD_ID 47452                                                                                                  | cb6360_c5/f1p1/2881      | 1   | 1542 | 1538 | 2192 | 1    | 1536 | 2202 | 2858 |
| cb8564_c88594/f2p0/3794                                                                                             | gnl BL_ORD_ID 17407                                                                                                  | cb8564_c85285/f1p0/4248  |     |      |      |      |      |      |      |      |
| isoform=cb8564_c88594;full_length_coverage=2;non_full_length_coverage=0;isoform_length=3794;expected_accuracy=0.991 | isoform=cb8564_c85285;full_length_coverage=1;non_full_length_coverage=0;isoform_length=4248;expected_accuracy=0.991  |                          | 1   | 1942 | 1941 | 3786 | 1    | 1930 | 2402 | 4248 |

|                                                                                                                                                                    |                                                                                                                                                                                                   |      |      |      |      |      |          |      |          |
|--------------------------------------------------------------------------------------------------------------------------------------------------------------------|---------------------------------------------------------------------------------------------------------------------------------------------------------------------------------------------------|------|------|------|------|------|----------|------|----------|
| accuracy=0.997<br>cb3690_c7/f1p1/3164<br>isoform=cb3690_c7;full_length_coverage=1;non_full_length_coverage=1;isoform_length=3164;expected_accuracy=1.000           | accuracy=0.997<br>gnl BL_ORD_ID 39399                      cb3690_c1/f1p0/3553<br>isoform=cb3690_c1;full_length_coverage=1;non_full_length_coverage=0;isoform_length=3553;expected_accuracy=0.996 | 147  | 1796 | 1794 | 3164 | 1    | 164<br>8 | 2183 | 355<br>3 |
| cb14241_c0/f3p0/1412<br>isoform=cb14241_c0;full_length_coverage=3;non_full_length_coverage=0;isoform_length=1412;expected_accuracy=1.000                           | gnl BL_ORD_ID 25524                      cb14241_c1/f2p0/1587<br>isoform=cb14241_c1;full_length_coverage=2;non_full_length_coverage=0;isoform_length=1587;expected_accuracy=1.000                 | 169  | 1412 | 55   | 174  | 343  | 158<br>5 | 1    | 120      |
| cb2640_c13/f1p0/3176<br>cb12972_c15/f1p0/1541<br>isoform=cb12972_c15;full_length_coverage=1;non_full_length_coverage=0;isoform_length=1541;expected_accuracy=0.996 | gnl BL_ORD_ID 68659   cb2640_c11/f1p0/3319<br>gnl BL_ORD_ID 54792   cb8564_c2623/f1p1/2475                                                                                                        | 203  | 3176 | 2    | 206  | 352  | 332<br>6 | 23   | 227      |
| cb9467_c19/f1p0/3033<br>isoform=cb9467_c19;full_length_coverage=1;non_full_length_coverage=0;isoform_length=3033;expected_accuracy=0.991                           | gnl BL_ORD_ID 20200                      cb9467_c17/f1p0/3298<br>isoform=cb9467_c17;full_length_coverage=1;non_full_length_coverage=0;isoform_length=3298;expected_accuracy=1.000                 | 1477 | 3033 | 1    | 1477 | 1614 | 317<br>3 | 7    | 150<br>4 |
| cb500_c17/f1p0/2323<br>isoform=cb500_c17;full_length_coverage=1;non_full_length_coverage=0;isoform_length=2323;expected_accuracy=0.997                             | gnl BL_ORD_ID 41883                      cb500_c72/f1p0/4040<br>isoform=cb500_c72;full_length_coverage=1;non_full_length_coverage=0;isoform_length=4040;expected_accuracy=0.996                   | 1    | 1293 | 1288 | 2323 | 1378 | 267<br>0 | 2802 | 383<br>6 |
| cb3813_c6/f1p0/1430<br>isoform=cb3813_c6;full_length_coverage=1;non_full_length_coverage=0;isoform_length=1430;expected_accuracy=0.997                             | gnl BL_ORD_ID 39713                      cb3813_c1/f1p0/3520<br>isoform=cb3813_c1;full_length_coverage=1;non_full_length_coverage=0;isoform_length=3520;expected_accuracy=0.997                   | 144  | 1430 | 31   | 147  | 2236 | 351<br>6 | 1937 | 205<br>1 |

|                                                                                                                                                     |                                                                                                                                                                                 |     |      |      |      |      |      |      |      |
|-----------------------------------------------------------------------------------------------------------------------------------------------------|---------------------------------------------------------------------------------------------------------------------------------------------------------------------------------|-----|------|------|------|------|------|------|------|
| acy=1.000<br>cb5564_c6/f3p0/2246<br>isoform=cb5564_c6;full_length_coverage=3;non_full_length_coverage=0;isoform_length=2246;expected_accuracy=0.999 | cy=0.997<br>gnl BL_ORD_ID 44963      cb5564_c14/f14p1/2858<br>isoform=cb5564_c14;full_length_coverage=14;non_full_length_coverage=1;isoform_length=2858;expected_accuracy=1.000 | 156 | 2203 | 1    | 159  | 810  | 2858 | 121  | 279  |
| cb1514_c4/f2p1/3503<br>isoform=cb1514_c4;full_length_coverage=2;non_full_length_coverage=1;isoform_length=3503;expected_accuracy=0.997              | gnl BL_ORD_ID 29253      cb1514_c14/f1p1/3711<br>isoform=cb1514_c14;full_length_coverage=1;non_full_length_coverage=1;isoform_length=3711;expected_accuracy=0.997               | 1   | 3277 | 3277 | 3480 | 131  | 3408 | 3508 | 3711 |
| cb8564_c78480/f1p0/2950                                                                                                                             | gnl BL_ORD_ID 16743      cb8564_c68940/f2p0/3028<br>isoform=cb8564_c68940;full_length_coverage=2;non_full_length_coverage=0;isoform_length=3028;expected_accuracy=0.998         | 1   | 1506 | 1506 | 2889 | 22   | 1529 | 1645 | 3028 |
| cb17862_c4/f1p0/1707                                                                                                                                | gnl BL_ORD_ID 5715      cb6802_c24/f1p0/4072<br>isoform=cb6802_c24;full_length_coverage=1;non_full_length_coverage=0;isoform_length=4072;expected_accuracy=0.995                | 358 | 1682 | 64   | 360  | 2752 | 4072 | 224  | 520  |
| cb8564_c52869/f3p2/3055<br>isoform=cb8564_c52869;full_length_coverage=3;non_full_length_coverage=2;isoform_length=3055;expected_accuracy=1.000      | gnl BL_ORD_ID 11261      cb8564_c146388/f5p4/3129<br>isoform=cb8564_c146388;full_length_coverage=5;non_full_length_coverage=4;isoform_length=3129;expected_accuracy=0.999       | 130 | 3004 | 1    | 129  | 255  | 3129 | 1    | 129  |
| cb8564_c46939/f1p1/2926                                                                                                                             | gnl BL_ORD_ID 55182      cb8564_c34825/f1p2/3200                                                                                                                                | 11  | 2134 | 2130 | 2870 | 6    | 2167 | 2272 | 3013 |
| cb8564_c41756/f1p0/2738<br>isoform=cb8564_c41756;full_length_coverage=1;non_full_length_coverage=0;isoform_length=2738;expected_                    | gnl BL_ORD_ID 55280      cb8564_c37198/f1p5/2941                                                                                                                                | 1   | 2173 | 2170 | 2738 | 1    | 2179 | 2360 | 2928 |

|                                                                                                                      |                                                                                                                      |                          |     |      |      |      |     |      |      |      |  |
|----------------------------------------------------------------------------------------------------------------------|----------------------------------------------------------------------------------------------------------------------|--------------------------|-----|------|------|------|-----|------|------|------|--|
| accuracy=0.996                                                                                                       |                                                                                                                      |                          |     |      |      |      |     |      |      |      |  |
| cb289_c5/f1p0/4379                                                                                                   | gnl BL_ORD_ID 38647                                                                                                  | cb289_c27/f5p1/4551      |     |      |      |      |     |      |      |      |  |
| isoform=cb289_c5;full_length_coverage=1;non_full_length_coverage=0;isoform_length=4379;expected_accuracy=0.997       | isoform=cb289_c27;full_length_coverage=5;non_full_length_coverage=1;isoform_length=4551;expected_accuracy=0.999      |                          | 1   | 4156 | 4156 | 4378 | 69  | 4226 | 4328 | 4551 |  |
| cb7680_c12/f1p1/2361                                                                                                 | gnl BL_ORD_ID 51460                                                                                                  | cb7680_c7/f1p3/2568      |     |      |      |      |     |      |      |      |  |
| isoform=cb7680_c12;full_length_coverage=1;non_full_length_coverage=1;isoform_length=2361;expected_accuracy=0.997     |                                                                                                                      |                          | 1   | 1797 | 1794 | 2361 | 7   | 1805 | 1955 | 2523 |  |
| cb3450_c6/f1p0/2269                                                                                                  | gnl BL_ORD_ID 41480                                                                                                  | cb3450_c4/f1p1/3102      |     |      |      |      |     |      |      |      |  |
| isoform=cb3450_c6;full_length_coverage=1;non_full_length_coverage=0;isoform_length=2269;expected_accuracy=0.997      | isoform=cb3450_c4;full_length_coverage=1;non_full_length_coverage=1;isoform_length=3102;expected_accuracy=0.997      |                          | 1   | 1625 | 1621 | 2269 | 30  | 1646 | 2409 | 3059 |  |
| cb293_c2/f1p1/4354                                                                                                   | gnl BL_ORD_ID 69536                                                                                                  | cb293_c7/f1p0/4528       |     |      |      |      |     |      |      |      |  |
| isoform=cb293_c2;full_length_coverage=1;non_full_length_coverage=1;isoform_length=4354;expected_accuracy=0.994       |                                                                                                                      |                          | 23  | 2319 | 2318 | 4354 | 1   | 2302 | 2411 | 4432 |  |
| cb8564_c154696/f1p1/2190                                                                                             | gnl BL_ORD_ID 9841                                                                                                   | cb8564_c115378/f1p0/2599 |     |      |      |      |     |      |      |      |  |
| isoform=cb8564_c154696;full_length_coverage=1;non_full_length_coverage=1;isoform_length=2190;expected_accuracy=0.993 | isoform=cb8564_c115378;full_length_coverage=1;non_full_length_coverage=0;isoform_length=2599;expected_accuracy=0.991 |                          | 224 | 2190 | 48   | 225  | 604 | 2563 | 1    | 180  |  |
| cb8564_c38570/f2p2/2760                                                                                              | gnl BL_ORD_ID 56650                                                                                                  | cb8564_c50769/f1p0/3074  |     |      |      |      |     |      |      |      |  |
| isoform=cb8564_c38570;full_length_coverage=2;non_full_length_coverage=2;isoform_length=2760;expected_accuracy=0.996  |                                                                                                                      |                          | 198 | 2732 | 1    | 198  | 333 | 2855 | 22   | 219  |  |
| cb4563_c37/f5p0/2841                                                                                                 | gnl BL_ORD_ID 42501                                                                                                  | cb4563_c10/f1p1/4024     |     |      |      |      |     |      |      |      |  |
|                                                                                                                      |                                                                                                                      |                          | 1   | 2337 | 2332 | 2748 | 1   | 233  | 3608 | 402  |  |



|                                                                                                                                                                  |                                                                                                                                                                    |      |      |      |      |      |      |      |      |
|------------------------------------------------------------------------------------------------------------------------------------------------------------------|--------------------------------------------------------------------------------------------------------------------------------------------------------------------|------|------|------|------|------|------|------|------|
| accuracy=0.999<br>cb8564_c77080/f1p0/2613<br>isoform=cb8564_c77080;full_length_coverage=1;non_full_length_coverage=0;isoform_length=2613;expected_accuracy=0.995 | curacy=0.998<br>gnl BL_ORD_ID 57804 cb8564_c81209/f1p0/3275                                                                                                        | 1    | 2048 | 2043 | 2613 | 117  | 2159 | 2340 | 2911 |
| cb946_c19/f1p0/3156<br>isoform=cb946_c19;full_length_coverage=1;non_full_length_coverage=0;isoform_length=3156;expected_accuracy=0.997                           | gnl BL_ORD_ID 19592 cb946_c2/f3p0/3333<br>isoform=cb946_c2;full_length_coverage=3;non_full_length_coverage=0;isoform_length=3333;expected_accuracy=1.000           | 1096 | 3156 | 1    | 1096 | 1206 | 3267 | 3    | 1098 |
| cb4286_c9/f1p1/2064<br>isoform=cb4286_c9;full_length_coverage=1;non_full_length_coverage=1;isoform_length=2064;expected_accuracy=0.993                           | gnl BL_ORD_ID 42550 cb4286_c14/f1p0/2234<br>isoform=cb4286_c14;full_length_coverage=1;non_full_length_coverage=0;isoform_length=2234;expected_accuracy=0.996       | 1    | 1563 | 1562 | 2042 | 56   | 1612 | 1755 | 2234 |
| cb18456_c3695/f1p0/1345                                                                                                                                          | gnl BL_ORD_ID 13743 cb8564_c21615/f1p7/4576<br>isoform=cb8564_c21615;full_length_coverage=1;non_full_length_coverage=7;isoform_length=4576;expected_accuracy=0.993 | 1    | 1051 | 1047 | 1293 | 235  | 1284 | 1459 | 1705 |
| cb8564_c39756/f1p1/3004                                                                                                                                          | gnl BL_ORD_ID 16172 cb8564_c53024/f1p0/3159<br>isoform=cb8564_c53024;full_length_coverage=1;non_full_length_coverage=0;isoform_length=3159;expected_accuracy=0.996 | 1    | 1703 | 1700 | 2854 | 1    | 1699 | 2017 | 3157 |
| cb233_c23/f1p0/2935                                                                                                                                              | gnl BL_ORD_ID 37995 cb233_c12/f1p0/3006<br>isoform=cb233_c12;full_length_coverage=1;non_full_length_coverage=0;isoform_length=3006;expected_accuracy=0.997         | 1    | 1912 | 1912 | 2911 | 2    | 1907 | 2008 | 3006 |
| cb8564_c4543/f1p0/2457                                                                                                                                           | gnl BL_ORD_ID 14176 cb8564_c4538/f2p0/2766                                                                                                                         | 1    | 2225 | 2223 | 2457 | 39   | 224  | 2436 | 266  |



|                                                                                                                      |                                                                                                                    |      |      |      |      |      |     |      |     |
|----------------------------------------------------------------------------------------------------------------------|--------------------------------------------------------------------------------------------------------------------|------|------|------|------|------|-----|------|-----|
| isoform=cb8564_c4543;full_length_coverage=1;non_full_length_coverage=0;isoform_length=2457;expected_accuracy=0.995   | isoform=cb8564_c4538;full_length_coverage=2;non_full_length_coverage=0;isoform_length=2766;expected_accuracy=0.994 |      |      |      |      |      |     | 3    | 4   |
| cb8564_c118011/f1p0/1965                                                                                             | gnl BL_ORD_ID 55292 cb8564_c37449/f1p0/2947                                                                        | 1    | 1321 | 1317 | 1964 | 482  | 180 | 1981 | 262 |
| cb2981_c7/f1p2/3345                                                                                                  | gnl BL_ORD_ID 38098 cb2981_c1/f1p0/3757                                                                            |      |      |      |      |      | 2   |      | 8   |
| isoform=cb2981_c7;full_length_coverage=1;non_full_length_coverage=2;isoform_length=3345;expected_accuracy=0.992      | isoform=cb2981_c1;full_length_coverage=1;non_full_length_coverage=0;isoform_length=3757;expected_accuracy=0.997    | 1    | 2656 | 2653 | 3296 | 118  | 276 | 3112 | 375 |
| cb388_c28/f1p3/3528                                                                                                  | gnl BL_ORD_ID 39449 cb388_c17/f1p0/3583                                                                            |      |      |      |      |      |     |      |     |
| isoform=cb388_c28;full_length_coverage=1;non_full_length_coverage=3;isoform_length=3528;expected_accuracy=1.000      | isoform=cb388_c17;full_length_coverage=1;non_full_length_coverage=0;isoform_length=3583;expected_accuracy=0.996    | 223  | 3466 | 21   | 222  | 339  | 358 | 22   | 221 |
| cb6947_c8/f2p0/1909                                                                                                  | gnl BL_ORD_ID 4835 cb6947_c6/f2p0/2118                                                                             |      |      |      |      |      |     |      |     |
|                                                                                                                      | isoform=cb6947_c6;full_length_coverage=2;non_full_length_coverage=0;isoform_length=2118;expected_accuracy=0.998    | 604  | 1898 | 9    | 604  | 807  | 210 | 1    | 592 |
| cb10480_c25/f1p0/2414                                                                                                | gnl BL_ORD_ID 48572 cb10480_c27/f1p0/3699                                                                          | 1    | 2076 | 2074 | 2429 | 712  | 278 | 3173 | 352 |
| cb8564_c178226/f1p0/2728                                                                                             |                                                                                                                    |      |      |      |      |      | 9   |      | 9   |
| isoform=cb8564_c178226;full_length_coverage=1;non_full_length_coverage=0;isoform_length=2728;expected_accuracy=0.998 | gnl BL_ORD_ID 61972 cb12931_c30/f1p0/5903                                                                          | 1284 | 2728 | 1    | 1288 | 1420 | 286 | 1    | 131 |
| cb8564_c111744/f1p1/2111                                                                                             |                                                                                                                    |      |      |      |      |      | 6   |      | 6   |
| isoform=cb8564_c111744;full_length_coverage=1;non_full_length_coverage=1;isoform_length=2111;expected_               | gnl BL_ORD_ID 52178 cb8564_c113392/f1p0/2376                                                                       | 1    | 1639 | 1635 | 2111 | 22   | 165 | 1830 | 230 |
|                                                                                                                      |                                                                                                                    |      |      |      |      |      | 7   |      | 6   |

|                                                                                                                                                                  |                                                                                                                                                                    |      |      |      |      |      |      |      |      |
|------------------------------------------------------------------------------------------------------------------------------------------------------------------|--------------------------------------------------------------------------------------------------------------------------------------------------------------------|------|------|------|------|------|------|------|------|
| accuracy=0.998<br>cb8564_c37390/f1p0/2683<br>isoform=cb8564_c37390;full_length_coverage=1;non_full_length_coverage=0;isoform_length=2683;expected_accuracy=1.000 | gnl BL_ORD_ID 57026 cb8564_c80880/f1p0/3252                                                                                                                        | 265  | 2683 | 1    | 267  | 837  | 3256 | 122  | 388  |
| cb7296_c1/f4p1/2068<br>isoform=cb7296_c1;full_length_coverage=4;non_full_length_coverage=1;isoform_length=2068;expected_accuracy=0.997                           | gnl BL_ORD_ID 6916 cb7296_c3/f1p1/2653<br>isoform=cb7296_c3;full_length_coverage=1;non_full_length_coverage=1;isoform_length=2653;expected_accuracy=0.998          | 1    | 1704 | 1703 | 1978 | 39   | 1741 | 2347 | 2622 |
| cb9143_c30/f2p0/2817<br>isoform=cb9143_c30;full_length_coverage=2;non_full_length_coverage=0;isoform_length=2817;expected_accuracy=0.996                         | gnl BL_ORD_ID 20976 cb9143_c192/f178p0/3055<br>isoform=cb9143_c192;full_length_coverage=178;non_full_length_coverage=0;isoform_length=3055;expected_accuracy=1.000 | 199  | 2817 | 1    | 203  | 437  | 3055 | 101  | 303  |
| cb2739_c8/f1p0/3454                                                                                                                                              | gnl BL_ORD_ID 69934 cb2739_c3/f1p0/3875                                                                                                                            | 1247 | 3463 | 1    | 1252 | 1505 | 3715 | 157  | 1401 |
| cb7984_c7/f1p0/1936                                                                                                                                              | gnl BL_ORD_ID 7814 cb7984_c6/f1p0/2519<br>isoform=cb7984_c6;full_length_coverage=1;non_full_length_coverage=0;isoform_length=2519;expected_accuracy=0.994          | 304  | 1937 | 35   | 306  | 754  | 2392 | 1    | 270  |
| cb3334_c2/f1p0/2904                                                                                                                                              | gnl BL_ORD_ID 41020 cb3334_c1/f1p0/3655<br>isoform=cb3334_c1;full_length_coverage=1;non_full_length_coverage=0;isoform_length=3655;expected_accuracy=0.996         | 552  | 2916 | 71   | 555  | 1291 | 3655 | 1    | 482  |
| cb8564_c116509/f1p0/3009                                                                                                                                         | gnl BL_ORD_ID 52900 cb8564_c111266/f1p0/3561                                                                                                                       | 10   | 2016 | 2015 | 2985 | 37   | 2043 | 2267 | 3237 |
| cb3290_c38/f1p0/2345                                                                                                                                             | gnl BL_ORD_ID 40879 cb3290_c194/f3p0/2878                                                                                                                          | 1150 | 2345 | 1    | 1151 | 1574 | 276  | 267  | 141  |

|                                                                                                                                                |                                                                                                                                                                         |      |      |      |      |      |      |      |      |
|------------------------------------------------------------------------------------------------------------------------------------------------|-------------------------------------------------------------------------------------------------------------------------------------------------------------------------|------|------|------|------|------|------|------|------|
| isoform=cb3290_c38;full_length_coverage=1;non_full_length_coverage=0;isoform_length=2345;expected_accuracy=0.996<br>cb8564_c24710/f1p0/2430    | isoform=cb3290_c194;full_length_coverage=3;non_full_length_coverage=0;isoform_length=2878;expected_accuracy=0.997<br>gnl BL_ORD_ID 10372      cb8564_c10402/f1p1/2617   |      |      |      |      |      | 9    |      | 7    |
| isoform=cb8564_c24710;full_length_coverage=1;non_full_length_coverage=0;isoform_length=2430;expected_accuracy=0.996<br>cb8564_c68610/f6p0/2150 | isoform=cb8564_c10402;full_length_coverage=1;non_full_length_coverage=1;isoform_length=2617;expected_accuracy=0.994<br>gnl BL_ORD_ID 58113      cb8564_c89263/f1p0/2300 | 1    | 1499 | 1502 | 2430 | 2    | 1505 | 1605 | 2539 |
| isoform=cb8564_c68610;full_length_coverage=6;non_full_length_coverage=0;isoform_length=2150;expected_accuracy=1.000<br>cb8564_c45300/f1p4/3014 | isoform=cb8564_c50151;full_length_coverage=1;non_full_length_coverage=0;isoform_length=3198;expected_accuracy=0.995<br>gnl BL_ORD_ID 16622      cb8564_c50151/f1p0/3198 | 212  | 2072 | 4    | 214  | 352  | 2213 | 4    | 214  |
| isoform=cb8564_c45300;full_length_coverage=1;non_full_length_coverage=4;isoform_length=3014;expected_accuracy=0.996<br>cb5943_c6/f1p0/1364     | isoform=cb8564_c50151;full_length_coverage=1;non_full_length_coverage=0;isoform_length=3198;expected_accuracy=0.995<br>gnl BL_ORD_ID 46197      cb5943_c4/f1p0/1485     | 243  | 3014 | 1    | 246  | 404  | 3198 | 6    | 247  |
| isoform=cb5943_c4;full_length_coverage=1;non_full_length_coverage=0;isoform_length=1485;expected_accuracy=0.992<br>cb14220_c12/f1p0/6602       | isoform=cb5943_c4;full_length_coverage=1;non_full_length_coverage=0;isoform_length=1485;expected_accuracy=0.992<br>gnl BL_ORD_ID 63134      cb14220_c9/f1p0/6925        | 326  | 1329 | 5    | 327  | 482  | 1485 | 1    | 323  |
| isoform=cb14220_c9;full_length_coverage=1;non_full_length_coverage=0;isoform_length=6925;expected_accuracy=0.996<br>cb8564_c182028/f1p0/2513   | isoform=cb14220_c9;full_length_coverage=1;non_full_length_coverage=0;isoform_length=6925;expected_accuracy=0.996<br>gnl BL_ORD_ID 52675      cb8564_c10772/f1p3/2796    | 2263 | 6512 | 1    | 2265 | 2708 | 6950 | 32   | 2293 |
| isoform=cb8564_c182028;full_length_coverage=1;non_full_length_coverage=0;isoform_length=2513;expected_accuracy=0.996<br>cb8790_c5/f1p0/1874    | isoform=cb8564_c10772;full_length_coverage=1;non_full_length_coverage=0;isoform_length=2796;expected_accuracy=0.996<br>gnl BL_ORD_ID 58367      cb8790_c3/f1p0/2841     | 1    | 1971 | 1968 | 2513 | 32   | 2004 | 2148 | 2693 |
|                                                                                                                                                |                                                                                                                                                                         | 1    | 1375 | 1375 | 1696 | 17   | 139  | 2511 | 283  |

|                         |                                                                                                                                                                           |     |      |      |      |      |          |      |          |
|-------------------------|---------------------------------------------------------------------------------------------------------------------------------------------------------------------------|-----|------|------|------|------|----------|------|----------|
|                         |                                                                                                                                                                           |     |      |      |      |      |          | 3    | 2        |
| cb12714_c29/f1p2/1583   | gnl BL_ORD_ID 10640      cb8564_c100234/f2p5/2744<br>isoform=cb8564_c100234;full_length_coverage=2;non_full_length_coverage=5;isoform_length=2744;expected_accuracy=0.993 | 1   | 1296 | 1293 | 1597 | 6    | 1311     | 2378 | 268<br>2 |
| cb5440_c11/f2p0/1312    | gnl BL_ORD_ID 73927      cb5440_c7/f1p1/3066<br>isoform=cb5440_c11;full_length_coverage=2;non_full_length_coverage=0;isoform_length=1312;expected_accuracy=0.995          | 1   | 1019 | 1014 | 1312 | 61   | 107<br>3 | 2668 | 296<br>4 |
| cb1240_c4/f1p1/4081     | gnl BL_ORD_ID 61170      cb1240_c6/f1p0/4543<br>isoform=cb1240_c4;full_length_coverage=1;non_full_length_coverage=1;isoform_length=4081;expected_accuracy=0.995           | 1   | 2657 | 2654 | 4071 | 84   | 274<br>6 | 2878 | 430<br>1 |
| cb8564_c46212/f3p1/4373 | gnl BL_ORD_ID 14942      cb8564_c34188/f2p3/4546<br>isoform=cb8564_c46212;full_length_coverage=3;non_full_length_coverage=1;isoform_length=4373;expected_accuracy=0.999   | 184 | 4322 | 1    | 185  | 407  | 454<br>6 | 5    | 181      |
| cb8564_c42814/f1p0/2151 | gnl BL_ORD_ID 55359      cb8564_c39546/f1p2/3023<br>isoform=cb8564_c42814;full_length_coverage=1;non_full_length_coverage=0;isoform_length=2151;expected_accuracy=0.993   | 650 | 2151 | 7    | 652  | 1333 | 283<br>7 | 1    | 645      |
| cb2460_c3/f1p0/2273     | gnl BL_ORD_ID 68527      cb2460_c4/f1p0/3681<br>isoform=cb2460_c3;full_length_coverage=1;non_full_length_coverage=0;isoform_length=2273;expected_accuracy=0.994           | 294 | 2246 | 47   | 293  | 1737 | 368<br>9 | 55   | 301      |
| cb955_c17/f1p0/2026     | gnl BL_ORD_ID 59133      cb955_c46/f1p0/2377<br>isoform=cb955_c17;full_length_coverage=1;non_full_length_coverage=0;isoform_length=2026;expected_accuracy=0.993           | 229 | 2026 | 4    | 228  | 403  | 219      | 6    | 230      |

|                                                                                                                                                  |                                                                                                                                                                             |     |      |      |      |      |     |      |     |   |
|--------------------------------------------------------------------------------------------------------------------------------------------------|-----------------------------------------------------------------------------------------------------------------------------------------------------------------------------|-----|------|------|------|------|-----|------|-----|---|
| isoform=cb955_c17;full_length_coverage=1;non_full_length_coverage=0;isoform_length=2026;expected_accuracy=0.990                                  |                                                                                                                                                                             |     |      |      |      |      |     |      |     | 7 |
| cb8564_c1140/f1p3/1962<br>isoform=cb8564_c1140;full_length_coverage=1;non_full_length_coverage=3;isoform_length=1962;expected_accuracy=0.997     | gnl BL_ORD_ID 12027      cb8564_c146113/f15p5/2092<br>isoform=cb8564_c146113;full_length_coverage=15;non_full_length_coverage=5;isoform_length=2092;expected_accuracy=1.000 | 112 | 1962 | 1    | 112  | 235  | 208 | 14   | 123 |   |
| cb8564_c45300/f1p4/3014<br>isoform=cb8564_c45300;full_length_coverage=1;non_full_length_coverage=4;isoform_length=3014;expected_accuracy=0.996   | gnl BL_ORD_ID 12440      cb8564_c130435/f1p3/3226<br>isoform=cb8564_c130435;full_length_coverage=1;non_full_length_coverage=3;isoform_length=3226;expected_accuracy=0.994   | 243 | 3014 | 1    | 246  | 417  | 320 | 2    | 260 |   |
| cb3493_c11/f1p0/3332                                                                                                                             | gnl BL_ORD_ID 40022      cb3493_c4/f1p0/3469<br>isoform=cb3493_c4;full_length_coverage=1;non_full_length_coverage=0;isoform_length=3469;expected_accuracy=1.000             | 1   | 2347 | 2342 | 3014 | 22   | 236 | 2477 | 314 | 8 |
| cb8564_c76007/f1p0/2966                                                                                                                          | gnl BL_ORD_ID 55920      cb8564_c48949/f1p0/4357                                                                                                                            | 13  | 2291 | 2292 | 2946 | 5    | 229 | 2847 | 350 | 5 |
| cb8564_c126419/f1p0/1910<br>isoform=cb8564_c126419;full_length_coverage=1;non_full_length_coverage=0;isoform_length=1910;expected_accuracy=0.995 | gnl BL_ORD_ID 12781      cb8564_c159074/f1p3/2275<br>isoform=cb8564_c159074;full_length_coverage=1;non_full_length_coverage=3;isoform_length=2275;expected_accuracy=0.997   | 11  | 1731 | 1728 | 1899 | 1    | 171 | 2102 | 227 | 5 |
| cb8564_c36689/f1p1/2368<br>isoform=cb8564_c36689;full_length_coverage=1;non_full_length_coverage=1;isoform_length=2368;expected_accuracy=0.991   | gnl BL_ORD_ID 17161      cb8564_c87466/f1p1/3006<br>isoform=cb8564_c87466;full_length_coverage=1;non_full_length_coverage=1;isoform_length=3006;expected_accuracy=0.994     | 1   | 1709 | 1706 | 2368 | 1    | 171 | 2219 | 289 | 6 |
| cb18009_c1/f1p0/1857                                                                                                                             | gnl BL_ORD_ID 42205      cb4848_c5/f1p1/3168                                                                                                                                | 1   | 1504 | 1502 | 1799 | 1028 | 253 | 2873 | 316 |   |

|                                                                                                                      |                                                                                                                     |      |      |      |      |      |      |      |     |   |
|----------------------------------------------------------------------------------------------------------------------|---------------------------------------------------------------------------------------------------------------------|------|------|------|------|------|------|------|-----|---|
|                                                                                                                      | isoform=cb4848_c5;full_length_coverage=1;non_full_length_coverage=1;isoform_length=3168;expected_accuracy=0.994     |      |      |      |      |      |      | 0    |     | 8 |
| cb8564_c9734/f3p3/2491                                                                                               | gnl BL_ORD_ID 13265      cb8564_c21898/f1p1/2652                                                                    |      |      |      |      |      |      |      |     |   |
| isoform=cb8564_c9734;full_length_coverage=3;non_full_length_coverage=3;isoform_length=2491;expected_accuracy=1.000   | isoform=cb8564_c21898;full_length_coverage=1;non_full_length_coverage=1;isoform_length=2652;expected_accuracy=0.999 | 1214 | 2440 | 1    | 1219 | 1425 | 2652 | 1    | 122 | 2 |
| cb10352_c15/f1p1/1494                                                                                                | gnl BL_ORD_ID 2478      cb10352_c4/f1p0/2586                                                                        |      |      |      |      |      |      |      |     |   |
| isoform=cb10352_c15;full_length_coverage=1;non_full_length_coverage=1;isoform_length=1494;expected_accuracy=0.991    | isoform=cb10352_c4;full_length_coverage=1;non_full_length_coverage=0;isoform_length=2586;expected_accuracy=0.996    | 1    | 1159 | 1159 | 1494 | 79   | 1213 | 2244 | 257 | 9 |
| cb8564_c43779/f1p0/3021                                                                                              | gnl BL_ORD_ID 55377      cb8564_c39822/f1p0/3306                                                                    |      |      |      |      |      |      |      |     |   |
| isoform=cb8564_c43779;full_length_coverage=1;non_full_length_coverage=0;isoform_length=3021;expected_accuracy=0.993  |                                                                                                                     | 1    | 2344 | 2345 | 3020 | 1    | 2341 | 2497 | 316 | 9 |
| cb5001_c11/f1p0/2067                                                                                                 | gnl BL_ORD_ID 73185      cb5001_c5/f1p0/3084                                                                        |      |      |      |      |      |      |      |     |   |
| isoform=cb5001_c11;full_length_coverage=1;non_full_length_coverage=0;isoform_length=2067;expected_accuracy=0.997     |                                                                                                                     | 1    | 1585 | 1580 | 2073 | 7    | 1591 | 2367 | 286 | 0 |
| cb8564_c188193/f1p0/2849                                                                                             | gnl BL_ORD_ID 14531      cb8564_c41778/f1p9/3482                                                                    |      |      |      |      |      |      |      |     |   |
| isoform=cb8564_c188193;full_length_coverage=1;non_full_length_coverage=0;isoform_length=2849;expected_accuracy=0.997 | isoform=cb8564_c41778;full_length_coverage=1;non_full_length_coverage=9;isoform_length=3482;expected_accuracy=0.992 | 243  | 2849 | 1    | 247  | 812  | 3439 | 1    | 247 |   |
| cb8564_c122963/f1p0/3278                                                                                             | gnl BL_ORD_ID 53405      cb8564_c124255/f1p0/3874                                                                   |      |      |      |      |      |      |      |     |   |
| isoform=cb8564_c122963;full_length_coverage=1;non_full_length_coverage=0;isoform_length=3278;expected_accuracy=0.997 |                                                                                                                     | 1    | 2240 | 2237 | 3259 | 3    | 2221 | 2351 | 337 | 9 |
| cb7429_c17/f6p1/1677                                                                                                 | gnl BL_ORD_ID 8417      cb7429_c2/f1p0/2599                                                                         |      |      |      |      |      |      |      |     |   |
| isoform=cb7429_c17;full_length_coverage=6;non_full_length_coverage=1;isoform_length=1677;expected_accuracy=0.997     | isoform=cb7429_c2;full_length_coverage=1;non_full_length_coverage=0;isoform_length=2599;expected_accuracy=0.997     | 251  | 1677 | 48   | 252  | 1156 | 2581 | 43   | 248 |   |

|                                                                                                                                                      |                                                                                                                                                                                 |      |      |      |      |      |      |      |      |
|------------------------------------------------------------------------------------------------------------------------------------------------------|---------------------------------------------------------------------------------------------------------------------------------------------------------------------------------|------|------|------|------|------|------|------|------|
| racy=1.000<br>cb6028_c3/f1p0/2608<br>isoform=cb6028_c3;full_length_coverage=1;non_full_length_coverage=0;isoform_length=2608;expected_accuracy=0.994 | cy=0.997<br>gnl BL_ORD_ID 45690          cb6028_c4/f1p0/3558<br>isoform=cb6028_c4;full_length_coverage=1;non_full_length_coverage=0;isoform_length=3558;expected_accuracy=0.998 | 1142 | 2583 | 1    | 1144 | 2114 | 3558 | 1    | 1144 |
| cb8564_c35356/f1p0/2738<br>isoform=cb8564_c35356;full_length_coverage=1;non_full_length_coverage=0;isoform_length=2738;expected_accuracy=0.994       | gnl BL_ORD_ID 14539          cb8564_c46562/f2p3/3196<br>isoform=cb8564_c46562;full_length_coverage=2;non_full_length_coverage=3;isoform_length=3196;expected_accuracy=0.995     | 10   | 2072 | 2068 | 2737 | 16   | 2101 | 2525 | 3195 |
| cb3699_c5/f1p0/2467<br>isoform=cb3699_c5;full_length_coverage=1;non_full_length_coverage=0;isoform_length=2467;expected_accuracy=1.000               | gnl BL_ORD_ID 40092          cb3699_c9/f1p0/2741<br>isoform=cb3699_c9;full_length_coverage=1;non_full_length_coverage=0;isoform_length=2741;expected_accuracy=0.996             | 1161 | 2445 | 1    | 1162 | 1458 | 2741 | 1    | 1126 |
| cb7639_c0/f3p0/2226<br>isoform=cb7639_c0;full_length_coverage=3;non_full_length_coverage=0;isoform_length=2226;expected_accuracy=0.997               | gnl BL_ORD_ID 51425          cb7639_c7/f1p0/2500                                                                                                                                | 1    | 1800 | 1799 | 2226 | 1    | 1800 | 2079 | 2530 |
| cb1279_c9/f3p1/2959<br>isoform=cb1279_c9;full_length_coverage=3;non_full_length_coverage=1;isoform_length=2959;expected_accuracy=1.000               | gnl BL_ORD_ID 27065          cb1279_c46/f1p3/3121<br>isoform=cb1279_c46;full_length_coverage=1;non_full_length_coverage=3;isoform_length=3121;expected_accuracy=1.000           | 248  | 2959 | 1    | 249  | 420  | 3106 | 1    | 245  |
| cb8564_c89263/f1p0/2300<br>isoform=cb8564_c89263;full_length_coverage=1;non_full_length_coverage=0;isoform_length=2300;expected_accuracy=0.997       | gnl BL_ORD_ID 12420          cb8564_c125410/f1p0/2472<br>isoform=cb8564_c125410;full_length_coverage=1;non_full_length_coverage=0;isoform_length=2472;expected_accuracy=0.997   | 304  | 2213 | 4    | 300  | 552  | 2461 | 1    | 297  |
| cb8564_c146112/f14p3/2729<br>isoform=cb8564_c146112;full_length_coverage=1;non_full_length_coverage=0;isoform_length=2729;expected_accuracy=0.997    | gnl BL_ORD_ID 11493          cb8564_c1323/f1p1/2810<br>isoform=cb8564_c1323;full_length_coverage=1;non_full_length_coverage=0;isoform_length=2810;expected_accuracy=0.997       | 1    | 1508 | 1508 | 2699 | 5    | 151  | 1618 | 280  |

|                                                                                                                                              |                                                                                                                                                                                       |      |      |      |      |      |     |   |      |      |
|----------------------------------------------------------------------------------------------------------------------------------------------|---------------------------------------------------------------------------------------------------------------------------------------------------------------------------------------|------|------|------|------|------|-----|---|------|------|
| isoform=cb8564_c146112;full_length_coverage=14;non_full_length_coverage=3;isoform_length=2729;expected_accuracy=1.000<br>cb2710_c2/f1p0/2584 | isoform=cb8564_c1323;full_length_coverage=1;non_full_length_coverage=1;isoform_length=2810;expected_accuracy=1.000<br>gnl BL_ORD_ID 37908                      cb2710_c1/f1p0/3833    |      |      |      |      |      |     | 2 |      | 9    |
| isoform=cb2710_c2;full_length_coverage=1;non_full_length_coverage=0;isoform_length=2584;expected_accuracy=0.995<br>cb317_c13/f1p0/4439       | isoform=cb2710_c1;full_length_coverage=1;non_full_length_coverage=0;isoform_length=3833;expected_accuracy=0.997<br>gnl BL_ORD_ID 68195   cb317_c8/f1p1/4711                           | 363  | 2584 | 77   | 362  | 402  | 262 | 9 | 1    | 289  |
| isoform=cb9533_c10;full_length_coverage=1;non_full_length_coverage=0;isoform_length=1798;expected_accuracy=0.994<br>cb8564_c68409/f2p0/2141  | isoform=cb9533_c2;full_length_coverage=1;non_full_length_coverage=0;isoform_length=1999;expected_accuracy=0.996<br>gnl BL_ORD_ID 21714                      cb9533_c2/f1p0/1999       | 2    | 3147 | 3142 | 4217 | 8    | 315 | 9 | 3385 | 446  |
| isoform=cb8564_c68409;full_length_coverage=2;non_full_length_coverage=0;isoform_length=2141;expected_accuracy=0.995<br>cb1494_c16/f1p0/2427  | isoform=cb8564_c82833/f1p0/2593<br>gnl BL_ORD_ID 57089   cb8564_c82833/f1p0/2593                                                                                                      | 313  | 1798 | 74   | 313  | 419  | 190 | 5 | 2    | 241  |
| isoform=cb4981_c3;full_length_coverage=1;non_full_length_coverage=0;isoform_length=3014;expected_accuracy=0.994<br>cb16404_c11/f1p0/1451     | isoform=cb1494_c10;full_length_coverage=1;non_full_length_coverage=0;isoform_length=3165;expected_accuracy=0.994<br>gnl BL_ORD_ID 29800                      cb1494_c10/f1p0/3165     | 265  | 2110 | 53   | 265  | 590  | 243 | 5 | 1    | 212  |
|                                                                                                                                              | isoform=cb4981_c2;full_length_coverage=1;non_full_length_coverage=0;isoform_length=3208;expected_accuracy=0.994<br>gnl BL_ORD_ID 42532                      cb4981_c2/f1p0/3208       | 1199 | 2433 | 1    | 1199 | 1864 | 310 | 0 | 3    | 1197 |
|                                                                                                                                              | isoform=cb16404_c11;full_length_coverage=1;non_full_length_coverage=0;isoform_length=1451;expected_accuracy=0.994<br>gnl BL_ORD_ID 13367                      cb8564_c18807/f5p0/1966 | 1    | 2434 | 2432 | 3013 | 19   | 245 | 4 | 2626 | 320  |
|                                                                                                                                              |                                                                                                                                                                                       | 160  | 1451 | 32   | 164  | 660  | 195 | 1 |      | 133  |



|                                                                                                                   |                                                                                                                                                                         |      |      |      |      |      |      |      |      |  |
|-------------------------------------------------------------------------------------------------------------------|-------------------------------------------------------------------------------------------------------------------------------------------------------------------------|------|------|------|------|------|------|------|------|--|
| isoform=cb16404_c11;full_length_coverage=1;non_full_length_coverage=0;isoform_length=1451;expected_accuracy=1.000 | isoform=cb8564_c18807;full_length_coverage=5;non_full_length_coverage=0;isoform_length=1966;expected_accuracy=0.997                                                     |      |      |      |      |      |      | 0    |      |  |
| cb8564_c91716/f1p2/1902                                                                                           | gnl BL_ORD_ID 18575      cb8564_c90782/f1p0/2732<br>isoform=cb8564_c90782;full_length_coverage=1;non_full_length_coverage=0;isoform_length=2732;expected_accuracy=0.997 | 1    | 1445 | 1442 | 1817 | 48   | 1489 | 2357 | 2732 |  |
| cb8564_c2326/f1p0/2006                                                                                            | gnl BL_ORD_ID 14440      cb8564_c2355/f1p4/2493<br>isoform=cb8564_c2326;full_length_coverage=1;non_full_length_coverage=0;isoform_length=2006;expected_accuracy=0.990   | 230  | 2001 | 4    | 234  | 720  | 2488 | 4    | 240  |  |
| cb8564_c45884/f1p0/3837                                                                                           | gnl BL_ORD_ID 55587      cb8564_c46008/f1p0/4134                                                                                                                        | 1523 | 3846 | 1    | 1525 | 1752 | 4100 | 120  | 1644 |  |
| cb2415_c18/f1p5/5570                                                                                              | gnl BL_ORD_ID 37646      cb2415_c15/f1p3/5862<br>isoform=cb2415_c18;full_length_coverage=1;non_full_length_coverage=5;isoform_length=5570;expected_accuracy=0.998       | 1    | 4609 | 4609 | 5513 | 5    | 4597 | 4960 | 5862 |  |
| cb1142_c17/f1p1/2208                                                                                              | gnl BL_ORD_ID 59186      cb1142_c19/f1p0/2913                                                                                                                           | 1123 | 2211 | 1    | 1127 | 1597 | 2685 | 22   | 1175 |  |
| cb4932_c18/f1p0/1876                                                                                              | gnl BL_ORD_ID 73087      cb4932_c9/f1p0/2989                                                                                                                            | 173  | 1852 | 14   | 173  | 1225 | 2904 | 7    | 165  |  |
| cb1545_c34/f1p0/3898                                                                                              | gnl BL_ORD_ID 63730      cb1545_c15/f1p0/3646                                                                                                                           | 1    | 1854 | 1854 | 3462 | 10   | 1862 | 2020 | 3627 |  |
| cb18456_c7053/f1p3/1132                                                                                           | gnl BL_ORD_ID 20952      cb9521_c5/f1p0/2804<br>isoform=cb18456_c7053;full_length_coverage=1;non_full_length_coverage=3;isoform_length=1132;expected_                   | 395  | 1132 | 5    | 399  | 1999 | 2735 | 3    | 393  |  |

|                                                                                                                                                                  |                                                                                                                                                                    |      |      |      |      |      |      |      |      |
|------------------------------------------------------------------------------------------------------------------------------------------------------------------|--------------------------------------------------------------------------------------------------------------------------------------------------------------------|------|------|------|------|------|------|------|------|
| accuracy=0.997<br>cb8564_c81775/f1p0/2506<br>isoform=cb8564_c81775;full_length_coverage=1;non_full_length_coverage=0;isoform_length=2506;expected_accuracy=0.990 | cy=0.991<br>gnl BL_ORD_ID 58115 cb8564_c89322/f1p0/2588                                                                                                            | 1    | 1376 | 1371 | 2457 | 1    | 1379 | 1498 | 2588 |
| cb8564_c44063/f1p0/2503<br>isoform=cb8564_c44063;full_length_coverage=1;non_full_length_coverage=0;isoform_length=2503;expected_accuracy=0.999                   | gnl BL_ORD_ID 55407 cb8564_c40851/f1p0/2747                                                                                                                        | 397  | 2421 | 4    | 402  | 553  | 2572 | 9    | 408  |
| cb8564_c112962/f1p0/2169<br>isoform=cb8564_c112962;full_length_coverage=1;non_full_length_coverage=0;isoform_length=2169;expected_accuracy=0.990                 | gnl BL_ORD_ID 15991 cb8564_c69437/f1p0/2197<br>isoform=cb8564_c69437;full_length_coverage=1;non_full_length_coverage=0;isoform_length=2197;expected_accuracy=0.996 | 1    | 1194 | 1194 | 2108 | 1    | 1185 | 1294 | 2197 |
| cb8564_c126213/f1p0/1904                                                                                                                                         | gnl BL_ORD_ID 52157 cb8564_c112829/f1p1/2052                                                                                                                       | 1    | 1585 | 1586 | 1773 | 27   | 1611 | 1802 | 1989 |
| cb1540_c17/f1p0/3387<br>isoform=cb1540_c17;full_length_coverage=1;non_full_length_coverage=0;isoform_length=3387;expected_accuracy=0.996                         | gnl BL_ORD_ID 28145 cb1540_c7/f1p0/4274<br>isoform=cb1540_c7;full_length_coverage=1;non_full_length_coverage=0;isoform_length=4274;expected_accuracy=0.996         | 136  | 3387 | 1    | 137  | 991  | 4265 | 315  | 462  |
| cb953_c5/f1p0/2793                                                                                                                                               | gnl BL_ORD_ID 20813 cb953_c2/f2p1/3253<br>isoform=cb953_c2;full_length_coverage=2;non_full_length_coverage=1;isoform_length=3253;expected_accuracy=1.000           | 1098 | 2641 | 1    | 1103 | 1711 | 3253 | 18   | 1123 |
| cb2737_c26/f1p0/2992<br>isoform=cb2737_c26;full_length_coverage=1;non_full_length_coverage=0;isoform_length=2992;expected_accuracy=0.999                         | gnl BL_ORD_ID 38133 cb2737_c21/f1p2/3479<br>isoform=cb2737_c21;full_length_coverage=1;non_full_length_coverage=2;isoform_length=3479;expected_accuracy=0.999       | 1    | 1804 | 1802 | 2992 | 196  | 2003 | 2135 | 3348 |

|                                                                                                                                                                                                                                                                                                                   |                                                                                                                                                                                                                                                                                                                                                                    |   |      |      |      |     |      |      |      |
|-------------------------------------------------------------------------------------------------------------------------------------------------------------------------------------------------------------------------------------------------------------------------------------------------------------------|--------------------------------------------------------------------------------------------------------------------------------------------------------------------------------------------------------------------------------------------------------------------------------------------------------------------------------------------------------------------|---|------|------|------|-----|------|------|------|
| <p>racy=0.996<br/>cb8564_c51533/f1p0/2888<br/>isoform=cb8564_c51533;full_length_coverage=1;non_full_length_coverage=0;isoform_length=2888;expected_accuracy=0.998<br/>cb3694_c3/f1p0/2055<br/>isoform=cb3694_c3;full_length_coverage=1;non_full_length_coverage=0;isoform_length=2055;expected_accuracy=0.997</p> | <p>acy=1.000<br/>gnl BL_ORD_ID 17053      cb8564_c74966/f1p0/3265<br/>isoform=cb8564_c74966;full_length_coverage=1;non_full_length_coverage=0;isoform_length=3265;expected_accuracy=0.992<br/>gnl BL_ORD_ID 41488      cb3694_c1/f1p0/2763<br/>isoform=cb3694_c1;full_length_coverage=1;non_full_length_coverage=0;isoform_length=2763;expected_accuracy=0.996</p> | 1 | 2144 | 2145 | 2881 | 15  | 2129 | 2529 | 3265 |
| <p>cb16334_c1/f1p0/1310<br/><br/>cb8564_c2073/f1p0/2565<br/>isoform=cb8564_c2073;full_length_coverage=1;non_full_length_coverage=0;isoform_length=2565;expected_accuracy=0.994</p>                                                                                                                                | <p>gnl BL_ORD_ID 12345      cb8564_c126557/f1p0/3867<br/>isoform=cb8564_c126557;full_length_coverage=1;non_full_length_coverage=0;isoform_length=3867;expected_accuracy=1.000<br/>gnl BL_ORD_ID 53822      cb8564_c2075/f2p0/3362</p>                                                                                                                              | 9 | 774  | 773  | 1317 | 19  | 795  | 3323 | 3867 |
| <p>cb8564_c71904/f1p1/2820<br/>isoform=cb8564_c71904;full_length_coverage=1;non_full_length_coverage=1;isoform_length=2820;expected_accuracy=0.996<br/>cb5741_c21/f7p1/1853<br/>isoform=cb5741_c21;full_length_coverage=7;non_full_length_coverage=1;isoform_length=1853;expected_accuracy=1.000</p>              | <p>gnl BL_ORD_ID 9611      cb8564_c107820/f9p3/3289<br/>isoform=cb8564_c107820;full_length_coverage=9;non_full_length_coverage=3;isoform_length=3289;expected_accuracy=1.000<br/>gnl BL_ORD_ID 44912      cb5741_c6/f2p0/2553<br/>isoform=cb5741_c6;full_length_coverage=2;non_full_length_coverage=0;isoform_length=2553;expected_accuracy=0.996</p>              | 1 | 1983 | 1978 | 2768 | 324 | 2309 | 2498 | 3289 |
| <p>cb7442_c43/f1p0/1720</p>                                                                                                                                                                                                                                                                                       | <p>gnl BL_ORD_ID 8272      cb7442_c31/f1p0/1802</p>                                                                                                                                                                                                                                                                                                                | 1 | 1391 | 1389 | 1659 | 28  | 142  | 1532 | 180  |

|                         |                                                                                                                                                                                  |     |      |      |      |     |      |      |      |
|-------------------------|----------------------------------------------------------------------------------------------------------------------------------------------------------------------------------|-----|------|------|------|-----|------|------|------|
|                         | isoform=cb7442_c31;full_length_coverage=1;non_full_length_coverage=0;isoform_length=1802;expected_accuracy=0.993                                                                 |     |      |      |      |     |      | 0    | 2    |
| cb6646_c26/f1p0/2555    | gnl BL_ORD_ID 3729                      cb6646_c22/f1p1/2606<br>isoform=cb6646_c22;full_length_coverage=1;non_full_length_coverage=1;isoform_length=2606;expected_accuracy=0.996 | 277 | 2504 | 93   | 278  | 380 | 2606 | 78   | 263  |
| cb395_c4/f1p0/3249      | gnl BL_ORD_ID 40012                      cb395_c1/f1p0/4857<br>isoform=cb395_c1;full_length_coverage=1;non_full_length_coverage=0;isoform_length=4857;expected_accuracy=0.999    | 13  | 2127 | 2123 | 3014 | 1   | 2109 | 3967 | 4857 |
| cb8564_c40598/f1p4/3119 | gnl BL_ORD_ID 55522   cb8564_c44123/f1p1/3230                                                                                                                                    | 16  | 2732 | 2729 | 3053 | 15  | 2726 | 2847 | 3171 |
| cb4746_c2/f2p1/2607     | gnl BL_ORD_ID 72931   cb4746_c3/f1p0/3262                                                                                                                                        | 113 | 1543 | 1542 | 2607 | 25  | 1454 | 2180 | 3245 |
| cb293_c6/f1p0/3758      | gnl BL_ORD_ID 68176   cb293_c8/f1p0/4316                                                                                                                                         | 1   | 1906 | 1903 | 3758 | 1   | 1910 | 2456 | 4311 |
| cb500_c47/f1p0/3506     | gnl BL_ORD_ID 72251   cb500_c68/f1p0/4152                                                                                                                                        | 302 | 3375 | 23   | 302  | 962 | 4035 | 133  | 424  |
| cb5013_c16/f1p0/2722    | gnl BL_ORD_ID 44297                      cb5013_c1/f4p0/2651<br>isoform=cb5013_c1;full_length_coverage=4;non_full_length_coverage=0;isoform_length=2651;expected_accuracy=0.997  | 231 | 2499 | 12   | 231  | 383 | 2651 | 7    | 224  |

|                                                                                                                                                  |                                                                                                                                                                                 |     |      |      |      |     |     |      |     |
|--------------------------------------------------------------------------------------------------------------------------------------------------|---------------------------------------------------------------------------------------------------------------------------------------------------------------------------------|-----|------|------|------|-----|-----|------|-----|
| cb13433_c61/f1p1/3251<br>isoform=cb13433_c61;full_length_coverage=1;non_full_length_coverage=1;isoform_length=3251;expected_accuracy=0.995       | cy=1.000<br>gnl BL_ORD_ID 25932      cb13433_c33/f2p1/4835<br>isoform=cb13433_c33;full_length_coverage=2;non_full_length_coverage=1;isoform_length=4835;expected_accuracy=1.000 | 105 | 2302 | 2301 | 3221 | 1   | 219 | 3915 | 483 |
| cb4016_c34/f1p0/2560<br>isoform=cb4016_c34;full_length_coverage=1;non_full_length_coverage=0;isoform_length=2560;expected_accuracy=0.998         | gnl BL_ORD_ID 39429      cb4016_c43/f1p0/2750<br>isoform=cb4016_c43;full_length_coverage=1;non_full_length_coverage=0;isoform_length=2750;expected_accuracy=0.994               | 194 | 2560 | 12   | 195  | 360 | 272 | 2    | 186 |
| cb13565_c12/f1p6/1695<br>isoform=cb13565_c12;full_length_coverage=1;non_full_length_coverage=6;isoform_length=1695;expected_accuracy=0.993       | gnl BL_ORD_ID 4515      cb6452_c4/f1p3/2166<br>isoform=cb6452_c4;full_length_coverage=1;non_full_length_coverage=3;isoform_length=2166;expected_accuracy=1.000                  | 428 | 1641 | 5    | 427  | 948 | 216 | 2    | 414 |
| cb3580_c45/f1p0/2434<br>isoform=cb3580_c45;full_length_coverage=1;non_full_length_coverage=0;isoform_length=2434;expected_accuracy=0.994         | gnl BL_ORD_ID 70487      cb3580_c58/f1p0/3103                                                                                                                                   | 220 | 2434 | 1    | 219  | 795 | 298 | 91   | 309 |
| cb8564_c121763/f1p2/2624<br>isoform=cb8564_c121763;full_length_coverage=1;non_full_length_coverage=2;isoform_length=2624;expected_accuracy=0.997 | gnl BL_ORD_ID 53109      cb8564_c116513/f1p1/2958                                                                                                                               | 1   | 2416 | 2417 | 2624 | 65  | 248 | 2656 | 286 |
| cb6065_c10/f1p0/2720<br>isoform=cb6065_c10;full_length_coverage=1;non_full_length_coverage=0;isoform_length=2720;expected_accuracy=0.998         | gnl BL_ORD_ID 46672      cb6065_c8/f1p0/3176<br>isoform=cb6065_c8;full_length_coverage=1;non_full_length_coverage=0;isoform_length=3176;expected_accuracy=0.995                 | 1   | 2044 | 2042 | 2705 | 5   | 205 | 2525 | 317 |
| cb8564_c179140/f1p0/2477                                                                                                                         | gnl BL_ORD_ID 17272      cb8564_c91851/f1p1/2644                                                                                                                                | 14  | 2041 | 2037 | 2471 | 26  | 205 | 2210 | 264 |

|                                                                                                                                                                                 |                                                                                                                                                                                        |     |      |      |      |     |          |      |          |
|---------------------------------------------------------------------------------------------------------------------------------------------------------------------------------|----------------------------------------------------------------------------------------------------------------------------------------------------------------------------------------|-----|------|------|------|-----|----------|------|----------|
| isoform=cb8564_c179140;full_length_coverage=1;non_full_length_coverage=0;isoform_length=2477;expected_accuracy=0.998<br>cb9571_c24/f1p2/1208                                    | isoform=cb8564_c91851;full_length_coverage=1;non_full_length_coverage=1;isoform_length=2644;expected_accuracy=0.993<br>gnl BL_ORD_ID 20599                      cb9571_c21/f1p2/1540   |     |      |      |      |     | 0        |      | 4        |
| isoform=cb9571_c24;full_length_coverage=1;non_full_length_coverage=2;isoform_length=1208;expected_accuracy=1.000<br>cb8564_c4645/f1p1/2620                                      | isoform=cb9571_c21;full_length_coverage=1;non_full_length_coverage=2;isoform_length=1540;expected_accuracy=0.999<br>gnl BL_ORD_ID 16733                      cb8564_c583/f1p2/2795     | 293 | 1208 | 35   | 298  | 561 | 147<br>7 | 20   | 283      |
| isoform=cb8564_c4645;full_length_coverage=1;non_full_length_coverage=1;isoform_length=2620;expected_accuracy=0.994<br>cb8564_c42091/f1p0/3606                                   | isoform=cb8564_c583;full_length_coverage=12;non_full_length_coverage=2;isoform_length=2795;expected_accuracy=1.000<br>gnl BL_ORD_ID 15834                      cb8564_c66814/f4p0/3927 | 1   | 1828 | 1829 | 2620 | 28  | 186<br>6 | 1990 | 278<br>0 |
| isoform=cb8564_c42091;full_length_coverage=1;non_full_length_coverage=0;isoform_length=3606;expected_accuracy=0.998<br>cb6730_c26/f1p1/2468                                     | isoform=cb8564_c66814;full_length_coverage=4;non_full_length_coverage=0;isoform_length=3927;expected_accuracy=1.000<br>gnl BL_ORD_ID 5875                      cb6730_c2/f5p0/2632     | 1   | 2325 | 2324 | 3606 | 4   | 233<br>0 | 2640 | 392<br>6 |
| isoform=cb6730_c26;full_length_coverage=1;non_full_length_coverage=1;isoform_length=2468;expected_accuracy=0.998<br>cb396_c48/f1p0/2172                                         | isoform=cb6730_c2;full_length_coverage=5;non_full_length_coverage=0;isoform_length=2632;expected_accuracy=1.000<br>gnl BL_ORD_ID 39504                      cb396_c16/f1p0/2356        | 1   | 1841 | 1842 | 2431 | 46  | 188<br>1 | 2062 | 263<br>2 |
| isoform=cb396_c48;full_length_coverage=1;non_full_length_coverage=0;isoform_length=2356;expected_accuracy=1.000<br>cb322_c54/f1p0/3800                                          | isoform=cb396_c16;full_length_coverage=1;non_full_length_coverage=0;isoform_length=2356;expected_accuracy=1.000<br>gnl BL_ORD_ID 39504                      cb396_c16/f1p0/2356        | 238 | 2063 | 3    | 238  | 531 | 235<br>6 | 70   | 282      |
| isoform=cb322_c54;full_length_coverage=1;non_full_length_coverage=0;isoform_length=3800;expected_accuracy=0.998<br>gnl BL_ORD_ID 70802                      cb322_c34/f1p0/3998 |                                                                                                                                                                                        | 25  | 2736 | 2734 | 3691 | 1   | 271<br>8 | 3056 | 401<br>2 |

|                                                                                                                  |                                                                                                                     |                         |     |      |      |      |     |      |      |     |   |   |
|------------------------------------------------------------------------------------------------------------------|---------------------------------------------------------------------------------------------------------------------|-------------------------|-----|------|------|------|-----|------|------|-----|---|---|
| acy=0.996                                                                                                        |                                                                                                                     |                         |     |      |      |      |     |      |      |     |   |   |
| cb2723_c2/f5p0/2798                                                                                              | gnl BL_ORD_ID 36753                                                                                                 | cb2723_c4/f2p0/4552     |     |      |      |      |     |      |      |     |   |   |
| isoform=cb2723_c2;full_length_coverage=5;non_full_length_coverage=0;isoform_length=2798;expected_accuracy=0.999  | isoform=cb2723_c4;full_length_coverage=2;non_full_length_coverage=0;isoform_length=4552;expected_accuracy=1.000     |                         | 22  | 2410 | 2410 | 2798 | 1   | 238  | 3276 | 366 | 8 | 4 |
| cb4226_c3/f1p0/2436                                                                                              | gnl BL_ORD_ID 42622                                                                                                 | cb4226_c4/f1p0/2756     |     |      |      |      |     |      |      |     |   |   |
| isoform=cb4226_c3;full_length_coverage=1;non_full_length_coverage=0;isoform_length=2436;expected_accuracy=1.000  | isoform=cb4226_c4;full_length_coverage=1;non_full_length_coverage=0;isoform_length=2756;expected_accuracy=0.995     |                         | 1   | 1768 | 1766 | 2334 | 23  | 178  | 1969 | 253 | 8 | 5 |
| cb12972_c26/f1p0/1766                                                                                            | gnl BL_ORD_ID 53852                                                                                                 | cb8564_c2734/f1p0/2131  | 203 | 1675 | 35   | 206  | 289 | 176  | 1    | 172 | 0 |   |
| cb5017_c3/f1p0/2006                                                                                              | gnl BL_ORD_ID 42855                                                                                                 | cb5017_c2/f1p0/2301     |     |      |      |      |     |      |      |     |   |   |
| isoform=cb5017_c3;full_length_coverage=1;non_full_length_coverage=0;isoform_length=2006;expected_accuracy=0.997  | isoform=cb5017_c2;full_length_coverage=1;non_full_length_coverage=0;isoform_length=2301;expected_accuracy=1.000     |                         | 1   | 1365 | 1363 | 2006 | 91  | 145  | 1658 | 230 | 5 | 1 |
| cb16315_c3/f1p0/1559                                                                                             |                                                                                                                     |                         |     |      |      |      |     |      |      |     |   |   |
| isoform=cb16315_c3;full_length_coverage=1;non_full_length_coverage=0;isoform_length=1559;expected_accuracy=0.992 | gnl BL_ORD_ID 72532                                                                                                 | cb4391_c5/f1p0/3162     | 184 | 1559 | 25   | 187  | 827 | 219  | 1    | 161 | 3 |   |
| cb8564_c48153/f1p0/3083                                                                                          | gnl BL_ORD_ID 14410                                                                                                 | cb8564_c44256/f1p1/3267 |     |      |      |      |     |      |      |     |   |   |
|                                                                                                                  | isoform=cb8564_c44256;full_length_coverage=1;non_full_length_coverage=1;isoform_length=3267;expected_accuracy=0.995 |                         | 13  | 2162 | 2158 | 2875 | 1   | 2119 | 2553 | 326 |   | 7 |
| cb8564_c139315/f1p2/3949                                                                                         | gnl BL_ORD_ID 13983                                                                                                 | cb8564_c40988/f2p0/4134 |     |      |      |      |     |      |      |     |   |   |
| isoform=cb8564_c139315;full_length_coverage=1;non_full_length_coverage=2;isoform_length=3949;expected            | isoform=cb8564_c40988;full_length_coverage=2;non_full_length_coverage=0;isoform_length=4134;expected_ac             |                         | 213 | 3825 | 1    | 214  | 477 | 409  | 2    | 216 | 5 |   |





|                         |                                                                                                                                                                         |     |      |      |      |      |          |      |          |  |
|-------------------------|-------------------------------------------------------------------------------------------------------------------------------------------------------------------------|-----|------|------|------|------|----------|------|----------|--|
| racy=0.995              | cy=0.997                                                                                                                                                                |     |      |      |      |      |          |      |          |  |
| cb1508_c6/f1p1/1904     | gnl BL_ORD_ID 30078      cb1508_c2/f2p0/1941<br>isoform=cb1508_c2;full_length_coverage=2;non_full_length_coverage=0;isoform_length=1941;expected_accuracy=1.000         | 372 | 1847 | 65   | 373  | 464  | 194<br>1 | 1    | 309      |  |
| cb12931_c15/f1p0/1493   | gnl BL_ORD_ID 16879      cb8564_c48606/f1p1/3308<br>isoform=cb12931_c15;full_length_coverage=1;non_full_length_coverage=0;isoform_length=1493;expected_accuracy=1.000   | 1   | 1106 | 1104 | 1492 | 1    | 1101     | 2920 | 330<br>8 |  |
| cb2097_c120/f1p0/1809   | gnl BL_ORD_ID 66707      cb2097_c91/f1p0/2631<br>isoform=cb2097_c120;full_length_coverage=1;non_full_length_coverage=0;isoform_length=1809;expected_accuracy=0.994      | 1   | 1422 | 1420 | 1753 | 442  | 186<br>7 | 1977 | 231<br>0 |  |
| cb8564_c45300/f1p4/3014 | gnl BL_ORD_ID 15169      cb8564_c40218/f1p0/3146<br>isoform=cb8564_c45300;full_length_coverage=1;non_full_length_coverage=4;isoform_length=3014;expected_accuracy=0.996 | 243 | 3012 | 1    | 246  | 399  | 314<br>6 | 4    | 243      |  |
| cb1648_c40/f1p0/1455    | gnl BL_ORD_ID 32504      cb1648_c14/f1p0/3818<br>isoform=cb1648_c40;full_length_coverage=1;non_full_length_coverage=0;isoform_length=1455;expected_accuracy=0.992       | 579 | 1455 | 6    | 583  | 2897 | 377<br>5 | 1    | 585      |  |
| cb8564_c23528/f1p0/4715 | gnl BL_ORD_ID 13659      cb8564_c20252/f1p0/4765<br>isoform=cb8564_c23528;full_length_coverage=1;non_full_length_coverage=0;isoform_length=4715;expected_accuracy=0.997 | 138 | 3161 | 3161 | 4485 | 1    | 302<br>4 | 3408 | 473<br>0 |  |
| cb8564_c88543/f1p0/3439 | gnl BL_ORD_ID 11721      cb8564_c145906/f6p0/3616                                                                                                                       | 235 | 3439 | 2    | 240  | 403  | 3611     | 40   | 279      |  |

|                                                                                                                                            |                                                                                                                                                                                         |     |      |      |      |      |      |      |      |
|--------------------------------------------------------------------------------------------------------------------------------------------|-----------------------------------------------------------------------------------------------------------------------------------------------------------------------------------------|-----|------|------|------|------|------|------|------|
| isoform=cb8564_c88543;full_length_coverage=1;non_full_length_coverage=0;isoform_length=3439;expected_accuracy=0.996<br>cb3088_c2/f1p0/3439 | isoform=cb8564_c145906;full_length_coverage=6;non_full_length_coverage=0;isoform_length=3616;expected_accuracy=1.000<br>gnl BL_ORD_ID 37821                      cb3088_c1/f1p0/3724    | 17  | 3121 | 3121 | 3439 | 1    | 3103 | 3392 | 3709 |
| isoform=cb3088_c2;full_length_coverage=1;non_full_length_coverage=0;isoform_length=3439;expected_accuracy=0.994<br>cb581_c7/f1p0/2369      | isoform=cb3088_c1;full_length_coverage=1;non_full_length_coverage=0;isoform_length=3724;expected_accuracy=0.998<br>gnl BL_ORD_ID 45253                      cb581_c2/f2p1/2578          | 1   | 1631 | 1627 | 2369 | 106  | 1735 | 1840 | 2578 |
| isoform=cb581_c7;full_length_coverage=1;non_full_length_coverage=0;isoform_length=2369;expected_accuracy=0.990<br>cb4768_c85/f1p0/1983     | isoform=cb581_c2;full_length_coverage=2;non_full_length_coverage=1;isoform_length=2578;expected_accuracy=0.998<br>gnl BL_ORD_ID 43790                      cb4768_c6/f5p3/2655          | 103 | 1983 | 1    | 106  | 773  | 2654 | 353  | 459  |
| isoform=cb4768_c85;full_length_coverage=1;non_full_length_coverage=0;isoform_length=1983;expected_accuracy=1.000<br>cb273_c4/f1p0/1772     | isoform=cb4768_c6;full_length_coverage=5;non_full_length_coverage=3;isoform_length=2655;expected_accuracy=1.000<br>gnl BL_ORD_ID 68135   cb273_c7/f1p0/5028                             | 1   | 1084 | 1084 | 1771 | 3098 | 4181 | 4321 | 4980 |
| isoform=cb273_c4;full_length_coverage=1;non_full_length_coverage=0;isoform_length=1772;expected_accuracy=0.999<br>cb2097_c50/f1p0/2824     | gnl BL_ORD_ID 66695   cb2097_c41/f1p3/3227                                                                                                                                              | 1   | 2323 | 2318 | 2754 | 76   | 2399 | 2574 | 3011 |
| cb8564_c15230/f1p0/1944                                                                                                                    | gnl BL_ORD_ID 12686                      cb8564_c15404/f1p9/2596<br>isoform=cb8564_c15404;full_length_coverage=1;non_full_length_coverage=9;isoform_length=2596;expected_accuracy=0.991 | 352 | 1944 | 6    | 357  | 1002 | 2596 | 7    | 360  |
| cb6067_c6/f1p0/2318                                                                                                                        | gnl BL_ORD_ID 74859   cb6067_c3/f1p0/2859                                                                                                                                               | 12  | 1201 | 1201 | 2269 | 29   | 121  | 1780 | 286  |

|                          |                                                                                                                                                                     |     |      |      |      |      |     |      |     |
|--------------------------|---------------------------------------------------------------------------------------------------------------------------------------------------------------------|-----|------|------|------|------|-----|------|-----|
|                          |                                                                                                                                                                     |     |      |      |      |      |     | 8    | 2   |
| cb8564_c15653/f1p4/2475  | gnl BL_ORD_ID 55119 cb8564_c24867/f1p3/2846                                                                                                                         | 22  | 2293 | 2289 | 2436 | 24   | 229 | 2516 | 266 |
|                          |                                                                                                                                                                     |     |      |      |      |      | 7   |      | 3   |
| cb18456_c1776/f1p0/1211  | gnl BL_ORD_ID 18624 cb8564_c83199/f1p1/2355<br>isoform=cb8564_c83199;full_length_coverage=1;non_full_length_coverage=1;isoform_length=2355;expected_accuracy=0.994  | 280 | 1214 | 9    | 285  | 977  | 43  | 1361 | 108 |
| cb3143_c10/f1p1/2863     | gnl BL_ORD_ID 37814 cb3143_c5/f1p3/3440<br>isoform=cb3143_c5;full_length_coverage=1;non_full_length_coverage=3;isoform_length=3440;expected_accuracy=0.999          | 163 | 2870 | 1    | 163  | 677  | 338 | 113  | 275 |
| cb8564_c112645/f1p0/3358 | gnl BL_ORD_ID 9642 cb8564_c117476/f1p1/3616<br>isoform=cb8564_c112645;full_length_coverage=1;non_full_length_coverage=0;isoform_length=3358;expected_accuracy=0.999 | 1   | 2943 | 2944 | 3357 | 4    | 293 | 3205 | 361 |
|                          |                                                                                                                                                                     |     |      |      |      |      | 7   |      | 6   |
| cb8564_c37361/f1p0/3076  | gnl BL_ORD_ID 55600 cb8564_c46484/f1p0/3151                                                                                                                         | 102 | 2481 | 2477 | 3070 | 5    | 240 | 2505 | 309 |
|                          |                                                                                                                                                                     |     |      |      |      |      | 4   |      | 7   |
| cb8564_c13735/f1p1/2121  | gnl BL_ORD_ID 18458 cb8564_c9882/f2p0/2918<br>isoform=cb8564_c13735;full_length_coverage=1;non_full_length_coverage=1;isoform_length=2121;expected_accuracy=0.994   | 264 | 2121 | 4    | 265  | 1056 | 291 | 1    | 263 |
|                          |                                                                                                                                                                     |     |      |      |      |      | 8   |      |     |
| cb8564_c16237/f1p1/3663  | gnl BL_ORD_ID 10513 cb8564_c11019/f3p1/4099<br>isoform=cb8564_c16237;full_length_coverage=1;non_full_length_coverage=1;isoform_length=3663;expected_accuracy=0.997  | 190 | 3663 | 1    | 190  | 615  | 409 | 4    | 193 |
|                          |                                                                                                                                                                     |     |      |      |      |      | 2   |      |     |
| cb4889_c22/f1p0/2625     | gnl BL_ORD_ID 73053 cb4889_c51/f1p5/2911                                                                                                                            | 280 | 2625 | 5    | 285  | 451  | 279 | 3    | 283 |

|                                                                                                                     |                                                                                                                     |                         |     |      |      |      |     |      |      |      |
|---------------------------------------------------------------------------------------------------------------------|---------------------------------------------------------------------------------------------------------------------|-------------------------|-----|------|------|------|-----|------|------|------|
| isoform=cb4889_c22;full_length_coverage=1;non_full_length_coverage=0;isoform_length=2625;expected_accuracy=0.995    |                                                                                                                     |                         |     |      |      |      |     |      |      | 6    |
| cb8564_c37866/f1p3/2874                                                                                             | gnl BL_ORD_ID 18852                                                                                                 | cb8564_c84488/f1p0/3408 |     |      |      |      |     |      |      |      |
| isoform=cb8564_c37866;full_length_coverage=1;non_full_length_coverage=3;isoform_length=2874;expected_accuracy=0.990 | isoform=cb8564_c84488;full_length_coverage=1;non_full_length_coverage=0;isoform_length=3408;expected_accuracy=0.996 |                         | 220 | 2863 | 1    | 220  | 790 | 3408 | 1    | 217  |
| cb8564_c83196/f1p0/2505                                                                                             | gnl BL_ORD_ID 16320                                                                                                 | cb8564_c68304/f3p0/3488 |     |      |      |      |     |      |      |      |
| isoform=cb8564_c83196;full_length_coverage=1;non_full_length_coverage=0;isoform_length=2505;expected_accuracy=0.995 | isoform=cb8564_c68304;full_length_coverage=3;non_full_length_coverage=0;isoform_length=3488;expected_accuracy=1.000 |                         | 1   | 1642 | 1642 | 2479 | 897 | 2539 | 2652 | 3488 |
| cb234_c1/f1p1/4574                                                                                                  | gnl BL_ORD_ID 38041                                                                                                 | cb234_c2/f1p2/4728      |     |      |      |      |     |      |      |      |
| isoform=cb234_c1;full_length_coverage=1;non_full_length_coverage=1;isoform_length=4574;expected_accuracy=0.997      | isoform=cb234_c2;full_length_coverage=1;non_full_length_coverage=2;isoform_length=4728;expected_accuracy=0.997      |                         | 1   | 4236 | 4231 | 4574 | 4   | 4240 | 4357 | 4699 |
| cb8564_c51923/f1p1/2966                                                                                             | gnl BL_ORD_ID 55920                                                                                                 | cb8564_c48949/f1p0/4357 |     |      |      |      |     |      |      |      |
| isoform=cb8564_c51923;full_length_coverage=1;non_full_length_coverage=1;isoform_length=2966;expected_accuracy=0.997 |                                                                                                                     |                         | 17  | 2301 | 2302 | 2966 | 16  | 2293 | 2847 | 3508 |
| cb2831_c22/f1p0/2102                                                                                                | gnl BL_ORD_ID 68917                                                                                                 | cb2831_c35/f1p0/2886    |     |      |      |      |     |      |      |      |
|                                                                                                                     | gnl BL_ORD_ID 14531                                                                                                 | cb8564_c41778/f1p9/3482 |     |      |      |      |     |      |      |      |
| cb8564_c35093/f1p5/2916                                                                                             | isoform=cb8564_c41778;full_length_coverage=1;non_full_length_coverage=9;isoform_length=3482;expected_accuracy=0.992 |                         | 259 | 2885 | 20   | 263  | 812 | 3439 | 2    | 247  |
| cb8564_c47159/f1p0/3238                                                                                             | gnl BL_ORD_ID 18906                                                                                                 | cb8564_c90449/f1p3/3223 |     |      |      |      |     |      |      |      |
|                                                                                                                     |                                                                                                                     |                         | 336 | 2919 | 81   | 337  | 640 | 322  | 41   | 296  |

|                         |                                                                                                                                                                       |      |      |      |      |      |      |      |      |   |
|-------------------------|-----------------------------------------------------------------------------------------------------------------------------------------------------------------------|------|------|------|------|------|------|------|------|---|
|                         | isoform=cb8564_c90449;full_length_coverage=1;non_full_length_coverage=3;isoform_length=3223;expected_accuracy=0.996                                                   |      |      |      |      |      |      |      |      | 3 |
| cb12972_c26/f1p0/1766   | gnl BL_ORD_ID 14141      cb8564_c2622/f1p1/2613<br>isoform=cb8564_c2622;full_length_coverage=1;non_full_length_coverage=1;isoform_length=2613;expected_accuracy=0.996 | 203  | 1675 | 6    | 204  | 1144 | 2613 | 7    | 205  |   |
| cb4489_c12/f1p0/1870    | gnl BL_ORD_ID 43268      cb4489_c6/f2p1/2678<br>isoform=cb4489_c12;full_length_coverage=1;non_full_length_coverage=0;isoform_length=1870;expected_accuracy=0.997      | 1    | 1118 | 1115 | 1870 | 1    | 1111 | 1862 | 2622 |   |
| cb1573_c16/f1p0/3454    | gnl BL_ORD_ID 28225      cb1573_c19/f1p1/3913<br>isoform=cb1573_c16;full_length_coverage=1;non_full_length_coverage=0;isoform_length=3454;expected_accuracy=0.998     | 1249 | 3454 | 1    | 1252 | 1453 | 3665 | 33   | 1294 |   |
| cb1913_c44/f1p0/2236    | gnl BL_ORD_ID 34517      cb1913_c65/f5p2/2595<br>isoform=cb1913_c44;full_length_coverage=1;non_full_length_coverage=0;isoform_length=2236;expected_accuracy=0.998     | 1    | 1634 | 1630 | 2236 | 111  | 1743 | 1868 | 2485 |   |
| cb8564_c41863/f2p3/2080 | gnl BL_ORD_ID 56001      cb8564_c51701/f1p0/2495                                                                                                                      | 127  | 1982 | 1    | 132  | 516  | 2371 | 1    | 132  |   |
| cb581_c5/f1p1/2742      | gnl BL_ORD_ID 45252      cb581_c3/f1p1/4740<br>isoform=cb581_c5;full_length_coverage=1;non_full_length_coverage=1;isoform_length=2742;expected_accuracy=0.996         | 1207 | 2742 | 1    | 1209 | 3107 | 4642 | 32   | 1227 |   |
| cb3037_c32/f1p0/2518    | gnl BL_ORD_ID 38434      cb3037_c15/f1p0/3566                                                                                                                         | 1    | 2228 | 2225 | 2473 | 30   | 224  | 3318 | 356  |   |

|                         |                                                                                                                                                             |     |      |      |      |      |          |      |          |
|-------------------------|-------------------------------------------------------------------------------------------------------------------------------------------------------------|-----|------|------|------|------|----------|------|----------|
|                         | isoform=cb3037_c15;full_length_coverage=1;non_full_length_coverage=0;isoform_length=3566;expected_accuracy=0.998                                            |     |      |      |      |      | 9        |      | 4        |
| cb4543_c0/f1p0/3310     | gnl BL_ORD_ID 71945 cb4543_c1/f1p0/3821                                                                                                                     | 652 | 3159 | 73   | 651  | 767  | 328<br>6 | 81   | 659      |
| cb8564_c38233/f1p0/2780 | gnl BL_ORD_ID 54732 cb8564_c160631/f1p4/3629                                                                                                                | 1   | 1857 | 1856 | 2785 | 716  | 257<br>2 | 2697 | 362<br>5 |
| cb4263_c4/f1p1/2943     | gnl BL_ORD_ID 43864 cb4263_c5/f1p1/3378<br>isoform=cb4263_c5;full_length_coverage=1;non_full_length_coverage=1;isoform_length=3378;expected_accuracy=1.000  | 242 | 2985 | 1    | 243  | 620  | 337<br>8 | 100  | 342      |
| cb7637_c9/f1p1/2355     | gnl BL_ORD_ID 7361 cb7637_c21/f8p0/2509<br>isoform=cb7637_c21;full_length_coverage=8;non_full_length_coverage=0;isoform_length=2509;expected_accuracy=1.000 | 14  | 1619 | 1618 | 2347 | 55   | 166<br>0 | 1780 | 250<br>7 |
| cb2520_c14/f1p1/2870    | isoform=cb2520_c14;full_length_coverage=1;non_full_length_coverage=1;isoform_length=2870;expected_accuracy=0.996                                            |     |      |      |      |      |          |      |          |
|                         | gnl BL_ORD_ID 69793 cb2520_c6/f1p0/4295                                                                                                                     | 103 | 2740 | 1    | 104  | 1637 | 427<br>4 | 1031 | 1136     |
| cb1909_c6/f1p0/3557     | gnl BL_ORD_ID 36390 cb1909_c3/f1p0/3823<br>isoform=cb1909_c3;full_length_coverage=1;non_full_length_coverage=0;isoform_length=3823;expected_accuracy=0.997  | 1   | 3344 | 3342 | 3484 | 117  | 345<br>9 | 3681 | 382<br>3 |
| cb2482_c31/f1p1/2865    | isoform=cb2482_c31;full_length_coverage=1;non_full_length_coverage=1;isoform_length=2865;expected_accuracy=0.997                                            |     |      |      |      |      |          |      |          |
|                         | gnl BL_ORD_ID 68553 cb2482_c45/f1p0/3357                                                                                                                    | 26  | 2632 | 2631 | 2865 | 61   | 266<br>4 | 2788 | 302<br>2 |

|                                                                                                                                                       |                                                                                                                                                                           |      |      |      |      |      |      |      |      |
|-------------------------------------------------------------------------------------------------------------------------------------------------------|---------------------------------------------------------------------------------------------------------------------------------------------------------------------------|------|------|------|------|------|------|------|------|
| racy=0.996<br>cb3307_c0/f1p2/2144<br>isoform=cb3307_c0;full_length_coverage=16;non_full_length_coverage=2;isoform_length=2144;expected_accuracy=1.000 | gnl BL_ORD_ID 41080      cb3307_c5/f2p0/3313<br>isoform=cb3307_c5;full_length_coverage=2;non_full_length_coverage=0;isoform_length=3313;expected_accuracy=0.997           | 168  | 2144 | 14   | 169  | 1342 | 3313 | 1    | 155  |
| cb5748_c6/f1p0/1754<br>isoform=cb5748_c6;full_length_coverage=1;non_full_length_coverage=0;isoform_length=1754;expected_accuracy=0.997                | gnl BL_ORD_ID 74381      cb5748_c4/f1p0/2096                                                                                                                              | 1    | 1063 | 1063 | 1754 | 1    | 1063 | 1359 | 2050 |
| cb8564_c2818/f1p0/2964<br>isoform=cb8564_c2818;full_length_coverage=1;non_full_length_coverage=0;isoform_length=2964;expected_accuracy=0.993          | gnl BL_ORD_ID 11783      cb8564_c149467/f1p0/3280<br>isoform=cb8564_c149467;full_length_coverage=1;non_full_length_coverage=0;isoform_length=3280;expected_accuracy=0.990 | 1127 | 2942 | 1    | 1126 | 1461 | 3279 | 1    | 1123 |
| cb8564_c40764/f1p0/2563<br>isoform=cb8564_c40764;full_length_coverage=1;non_full_length_coverage=0;isoform_length=2563;expected_accuracy=0.997        | gnl BL_ORD_ID 57176      cb8564_c85665/f1p0/3087                                                                                                                          | 14   | 2166 | 2162 | 2563 | 2    | 2174 | 2382 | 2787 |
| cb5641_c4/f1p1/1901<br>isoform=cb5641_c4;full_length_coverage=1;non_full_length_coverage=1;isoform_length=1901;expected_accuracy=0.996                | gnl BL_ORD_ID 74212      cb5641_c5/f1p0/2136                                                                                                                              | 1    | 1251 | 1250 | 1899 | 55   | 1305 | 1491 | 2140 |
| cb5743_c23/f1p0/2696                                                                                                                                  | gnl BL_ORD_ID 74377      cb5743_c16/f1p0/2959                                                                                                                             | 12   | 1581 | 1577 | 2602 | 4    | 1573 | 1679 | 2704 |
| cb1176_c32/f1p0/3993                                                                                                                                  | gnl BL_ORD_ID 23232      cb1176_c18/f1p2/4249<br>isoform=cb1176_c18;full_length_coverage=1;non_full_length_coverage=2;isoform_length=4249;expected_accuracy=0.997         | 110  | 3923 | 1    | 112  | 410  | 4199 | 10   | 122  |

|                                                                                                                                            |                                                                                                                                                                                  |      |      |      |      |      |          |      |          |  |
|--------------------------------------------------------------------------------------------------------------------------------------------|----------------------------------------------------------------------------------------------------------------------------------------------------------------------------------|------|------|------|------|------|----------|------|----------|--|
|                                                                                                                                            | acy=0.994                                                                                                                                                                        |      |      |      |      |      |          |      |          |  |
| cb416_c19/f1p0/2939                                                                                                                        | gnl BL_ORD_ID 72153 cb416_c49/f1p0/3164                                                                                                                                          | 1042 | 2856 | 10   | 1043 | 1254 | 307<br>0 | 7    | 104<br>2 |  |
| cb4674_c26/f1p1/3006<br>isoform=cb4674_c26;full_length_coverage=1;non_full_length_coverage=1;isoform_length=3006;expected_accuracy=0.995   | gnl BL_ORD_ID 72841 cb4674_c25/f1p0/3544                                                                                                                                         | 1    | 2157 | 2158 | 3004 | 5    | 214<br>1 | 2657 | 350<br>3 |  |
| cb11067_c13/f1p0/1371<br>isoform=cb11067_c13;full_length_coverage=1;non_full_length_coverage=0;isoform_length=1371;expected_accuracy=0.993 | gnl BL_ORD_ID 49133 cb11067_c3/f1p0/1547                                                                                                                                         | 1    | 1177 | 1176 | 1368 | 27   | 120<br>3 | 1312 | 150<br>4 |  |
| cb8041_c10/f1p2/2193<br>isoform=cb8041_c10;full_length_coverage=1;non_full_length_coverage=2;isoform_length=2193;expected_accuracy=1.000   | gnl BL_ORD_ID 8273                      cb8041_c27/f1p2/2321<br>isoform=cb8041_c27;full_length_coverage=1;non_full_length_coverage=2;isoform_length=2321;expected_accuracy=0.995 | 1    | 1495 | 1494 | 2133 | 25   | 151<br>9 | 1682 | 232<br>1 |  |
| cb7736_c8/f1p0/3317<br>isoform=cb7736_c8;full_length_coverage=1;non_full_length_coverage=0;isoform_length=3317;expected_accuracy=0.994     | gnl BL_ORD_ID 6316                      cb7736_c4/f1p0/3571<br>isoform=cb7736_c4;full_length_coverage=1;non_full_length_coverage=0;isoform_length=3571;expected_accuracy=0.996   | 1192 | 3317 | 1    | 1192 | 1439 | 356<br>5 | 17   | 121<br>6 |  |
| cb5874_c30/f1p0/2210                                                                                                                       | gnl BL_ORD_ID 74533 cb5874_c16/f1p0/3263                                                                                                                                         | 145  | 2190 | 1    | 145  | 875  | 292<br>1 | 533  | 677      |  |
| cb373_c6/f1p0/4615<br>isoform=cb373_c6;full_length_coverage=1;non_full_length_coverage=0;isoform_length=4615;expected_accuracy=0.997       | gnl BL_ORD_ID 40118                      cb373_c48/f1p0/5064<br>isoform=cb373_c48;full_length_coverage=1;non_full_length_coverage=0;isoform_length=5064;expected_accuracy=0.992  | 1    | 4223 | 4221 | 4474 | 6    | 420<br>0 | 4810 | 506<br>4 |  |
| cb8564_c53266/f1p2/2976                                                                                                                    | gnl BL_ORD_ID 60642 cb12244_c4/f1p1/4997                                                                                                                                         | 1    | 2754 | 2751 | 2985 | 1670 | 442      | 4545 | 477      |  |



|                         |                                                                                                                                                                                         |     |      |      |      |      |      |      |      |
|-------------------------|-----------------------------------------------------------------------------------------------------------------------------------------------------------------------------------------|-----|------|------|------|------|------|------|------|
|                         |                                                                                                                                                                                         |     |      |      |      |      |      | 3    | 9    |
| cb3106_c11/f1p0/2728    | gnl BL_ORD_ID 37403                      cb3106_c8/f1p0/3729<br>isoform=cb3106_c8;full_length_coverage=1;non_full_length_coverage=0;isoform_length=3729;expected_accuracy=0.994         | 1   | 1889 | 1885 | 2475 | 21   | 1906 | 3143 | 3727 |
| cb8564_c2323/f1p0/2212  | gnl BL_ORD_ID 54765                      cb8564_c2442/f1p1/2806<br>isoform=cb8564_c2323;full_length_coverage=1;non_full_length_coverage=0;isoform_length=2212;expected_accuracy=0.995   | 1   | 1320 | 1316 | 2209 | 2    | 1321 | 1599 | 2492 |
| cb341_c7/f1p0/2819      | gnl BL_ORD_ID 69573                      cb341_c10/f1p0/3009<br>isoform=cb341_c7;full_length_coverage=1;non_full_length_coverage=0;isoform_length=2819;expected_accuracy=1.000          | 1   | 2507 | 2507 | 2819 | 4    | 2509 | 2684 | 2996 |
| cb8564_c46939/f1p1/2926 | gnl BL_ORD_ID 55377                      cb8564_c39822/f1p0/3306<br>isoform=cb8564_c46939;full_length_coverage=1;non_full_length_coverage=0;isoform_length=2926;expected_accuracy=0.998 | 1   | 2134 | 2130 | 2870 | 1    | 2140 | 2245 | 2986 |
| cb16651_c18/f1p1/3071   | gnl BL_ORD_ID 31471                      cb16651_c8/f1p3/3966<br>isoform=cb16651_c18;full_length_coverage=1;non_full_length_coverage=1;isoform_length=3071;expected_accuracy=0.998      | 426 | 3071 | 5    | 428  | 1261 | 3910 | 1    | 420  |
| cb8564_c4940/f1p0/2731  | gnl BL_ORD_ID 16554                      cb8564_c701/f3p0/3014<br>isoform=cb8564_c4940;full_length_coverage=1;non_full_length_coverage=0;isoform_length=2731;expected_accuracy=0.996    | 1   | 1756 | 1755 | 2731 | 8    | 1770 | 2014 | 2992 |
| cb12972_c26/f1p0/1766   | gnl BL_ORD_ID 26048                      cb12972_c38/f1p0/1837<br>isoform=cb12972_c26;full_length_coverage=1;non_full_length_coverage=0;isoform_length=1766;expected_accuracy=0.997     | 203 | 1673 | 6    | 206  | 368  | 1837 | 51   | 251  |

|                         |                                                                                                                                                                                        |      |      |      |      |      |      |      |      |
|-------------------------|----------------------------------------------------------------------------------------------------------------------------------------------------------------------------------------|------|------|------|------|------|------|------|------|
| cb8564_c44063/f1p0/2503 | uracy=0.992<br>gnl BL_ORD_ID 13302      cb8564_c19160/f1p2/2687<br>isoform=cb8564_c19160;full_length_coverage=1;non_full_length_coverage=0;isoform_length=2503;expected_accuracy=0.999 | 397  | 2496 | 72   | 402  | 591  | 2687 | 105  | 446  |
| cb3665_c20/f1p0/2779    | gnl BL_ORD_ID 39192      cb3665_c4/f1p0/2857<br>isoform=cb3665_c4;full_length_coverage=1;non_full_length_coverage=0;isoform_length=2857;expected_accuracy=1.000                        | 1    | 1482 | 1479 | 2669 | 11   | 1492 | 1623 | 2813 |
| cb9214_c10/f1p0/1968    | gnl BL_ORD_ID 59579      cb9214_c8/f1p0/2150                                                                                                                                           | 1    | 1370 | 1368 | 1973 | 1    | 1370 | 1516 | 2121 |
| cb8889_c1/f2p1/2254     | gnl BL_ORD_ID 20509      cb8889_c9/f1p1/2462<br>isoform=cb8889_c1;full_length_coverage=2;non_full_length_coverage=1;isoform_length=2254;expected_accuracy=0.994                        | 1    | 1221 | 1221 | 2252 | 1    | 1205 | 1423 | 2462 |
| cb2658_c0/f3p1/7250     | gnl BL_ORD_ID 68687      cb2658_c3/f1p0/8266<br>isoform=cb2658_c0;full_length_coverage=3;non_full_length_coverage=1;isoform_length=7250;expected_accuracy=0.998                        | 3612 | 7248 | 12   | 3617 | 4576 | 8215 | 5    | 3612 |
| cb5121_c4/f1p0/2356     | gnl BL_ORD_ID 43684      cb5121_c3/f1p0/3174<br>isoform=cb5121_c4;full_length_coverage=1;non_full_length_coverage=0;isoform_length=2356;expected_accuracy=0.993                        | 1    | 1949 | 1946 | 2356 | 31   | 1984 | 2763 | 3173 |
| cb16776_c28/f1p0/5224   | gnl BL_ORD_ID 31806      cb16776_c17/f1p1/6143<br>isoform=cb16776_c28;full_length_coverage=1;non_full_length_coverage=0;isoform_length=5224;expected_acc                               | 2    | 4960 | 4959 | 5224 | 120  | 5077 | 5545 | 5812 |

|                                                                                                                  |                                                                                                                  |      |      |      |      |      |          |      |          |  |
|------------------------------------------------------------------------------------------------------------------|------------------------------------------------------------------------------------------------------------------|------|------|------|------|------|----------|------|----------|--|
| uracy=0.997                                                                                                      | uracy=0.995                                                                                                      |      |      |      |      |      |          |      |          |  |
| cb3421_c16/f1p0/2946                                                                                             | gnl BL_ORD_ID 71191 cb3421_c13/f1p0/4144                                                                         | 389  | 2896 | 43   | 389  | 1645 | 415<br>2 | 1    | 347      |  |
| cb1616_c20/f1p1/2895                                                                                             |                                                                                                                  |      |      |      |      |      |          |      |          |  |
| isoform=cb1616_c20;full_length_coverage=1;non_full_length_coverage=1;isoform_length=2895;expected_accuracy=0.997 | gnl BL_ORD_ID 63795 cb1616_c6/f1p1/3449                                                                          | 1    | 1968 | 1966 | 2864 | 79   | 204<br>3 | 2556 | 345<br>5 |  |
| cb2125_c25/f1p0/3582                                                                                             | gnl BL_ORD_ID 35696                      cb2125_c8/f2p0/3728                                                     |      |      |      |      |      |          |      |          |  |
| isoform=cb2125_c25;full_length_coverage=1;non_full_length_coverage=0;isoform_length=3582;expected_accuracy=0.995 | isoform=cb2125_c8;full_length_coverage=2;non_full_length_coverage=0;isoform_length=3728;expected_accuracy=0.995  | 236  | 3582 | 1    | 235  | 384  | 372<br>4 | 4    | 237      |  |
| cb8564_c48153/f1p0/3083                                                                                          | gnl BL_ORD_ID 56029 cb8564_c52782/f1p2/3327                                                                      | 255  | 2878 | 18   | 255  | 617  | 323<br>8 | 11   | 225      |  |
| cb8564_c4683/f1p0/2938                                                                                           | gnl BL_ORD_ID 55047 cb8564_c4680/f1p0/2928                                                                       | 243  | 2660 | 1    | 247  | 385  | 280<br>1 | 3    | 250      |  |
| cb10829_c0/f5p0/1551                                                                                             | gnl BL_ORD_ID 450                      cb10829_c1/f1p0/2092                                                      |      |      |      |      |      |          |      |          |  |
| isoform=cb10829_c0;full_length_coverage=5;non_full_length_coverage=0;isoform_length=1551;expected_accuracy=1.000 | isoform=cb10829_c1;full_length_coverage=1;non_full_length_coverage=0;isoform_length=2092;expected_accuracy=0.995 | 272  | 1550 | 57   | 277  | 814  | 209<br>2 | 1    | 221      |  |
| cb2875_c0/f7p0/3313                                                                                              | gnl BL_ORD_ID 38285                      cb2875_c11/f1p0/3661                                                    |      |      |      |      |      |          |      |          |  |
| isoform=cb2875_c0;full_length_coverage=7;non_full_length_coverage=0;isoform_length=3313;expected_accuracy=0.997  | isoform=cb2875_c11;full_length_coverage=1;non_full_length_coverage=0;isoform_length=3661;expected_accuracy=0.997 | 1590 | 3313 | 1    | 1591 | 1942 | 366<br>0 | 1    | 158<br>6 |  |
| cb7114_c7/f1p0/2312                                                                                              | gnl BL_ORD_ID 5846                      cb7114_c6/f1p0/2697                                                      |      |      |      |      |      |          |      |          |  |
|                                                                                                                  | isoform=cb7114_c6;full_length_coverage=1;non_full_length_coverage=0;isoform_length=2697;expected_accuracy=0.997  | 1    | 1515 | 1513 | 2306 | 7    | 152<br>4 | 1890 | 268<br>3 |  |



|                                                                                                                                                             |                                                                                                                                                                         |     |      |      |      |      |          |      |          |
|-------------------------------------------------------------------------------------------------------------------------------------------------------------|-------------------------------------------------------------------------------------------------------------------------------------------------------------------------|-----|------|------|------|------|----------|------|----------|
| acy=0.995<br>cb8564_c43779/f1p0/3021<br>isoform=cb8564_c43779;full_length_coverage=1;non_full_length_coverage=0;isoform_length=3021;expected_accuracy=0.993 | cy=0.998<br>gnl BL_ORD_ID 55472 cb8564_c42531/f1p0/3996                                                                                                                 | 124 | 2344 | 2345 | 3019 | 816  | 303<br>4 | 3190 | 386<br>3 |
| cb8564_c91159/f1p0/3159<br>isoform=cb8564_c91159;full_length_coverage=1;non_full_length_coverage=0;isoform_length=3159;expected_accuracy=0.998              | gnl BL_ORD_ID 15570      cb8564_c75349/f1p0/3566<br>isoform=cb8564_c75349;full_length_coverage=1;non_full_length_coverage=0;isoform_length=3566;expected_accuracy=0.995 | 1   | 1630 | 1628 | 3107 | 48   | 167<br>8 | 2088 | 356<br>6 |
| cb8564_c42814/f1p0/2151<br>isoform=cb8564_c42814;full_length_coverage=1;non_full_length_coverage=0;isoform_length=2151;expected_accuracy=0.993              | gnl BL_ORD_ID 14407      cb8564_c44036/f1p0/3258<br>isoform=cb8564_c44036;full_length_coverage=1;non_full_length_coverage=0;isoform_length=3258;expected_accuracy=0.992 | 650 | 2149 | 7    | 652  | 1757 | 325<br>8 | 1    | 645      |
| cb7010_c28/f1p0/2721<br>isoform=cb7010_c28;full_length_coverage=1;non_full_length_coverage=0;isoform_length=2721;expected_accuracy=0.997                    | gnl BL_ORD_ID 4517      cb7010_c8/f3p3/3171<br>isoform=cb7010_c8;full_length_coverage=3;non_full_length_coverage=3;isoform_length=3171;expected_accuracy=1.000          | 182 | 2721 | 1    | 185  | 559  | 309<br>7 | 5    | 189      |
| cb7096_c21/f1p0/2561                                                                                                                                        | gnl BL_ORD_ID 50336 cb7096_c16/f1p0/2638                                                                                                                                | 184 | 2463 | 1    | 185  | 316  | 259<br>5 | 15   | 199      |
| cb9445_c2/f1p0/1972<br>isoform=cb9445_c2;full_length_coverage=1;non_full_length_coverage=0;isoform_length=1972;expected_accuracy=0.991                      | gnl BL_ORD_ID 34648      cb2101_c3/f1p0/4051<br>isoform=cb2101_c3;full_length_coverage=1;non_full_length_coverage=0;isoform_length=4051;expected_accuracy=0.996         | 262 | 1972 | 36   | 263  | 2782 | 108<br>0 | 3971 | 375<br>2 |
| cb8564_c54537/f1p0/3163                                                                                                                                     | gnl BL_ORD_ID 18852      cb8564_c84488/f1p0/3408<br>isoform=cb8564_c84488;full_length_coverage=1;non_full_length_coverage=0;isoform_length=3408;expected_ac             | 313 | 2930 | 4    | 312  | 791  | 340<br>8 | 4    | 312      |

|                                                                                                                                                |                                                                                                                                                                           |     |      |      |      |      |          |      |          |  |
|------------------------------------------------------------------------------------------------------------------------------------------------|---------------------------------------------------------------------------------------------------------------------------------------------------------------------------|-----|------|------|------|------|----------|------|----------|--|
|                                                                                                                                                | curacy=0.996                                                                                                                                                              |     |      |      |      |      |          |      |          |  |
| cb8120_c4/flp0/2175                                                                                                                            | gnl BL_ORD_ID 51763 cb8120_c3/flp0/2751                                                                                                                                   | 945 | 2171 | 98   | 946  | 1477 | 270<br>3 | 1    | 849      |  |
| cb8564_c44014/flp0/3720                                                                                                                        | gnl BL_ORD_ID 56041 cb8564_c53077/flp2/3406                                                                                                                               | 353 | 3215 | 40   | 353  | 452  | 331<br>4 | 24   | 337      |  |
| cb8564_c43546/flp1/3276                                                                                                                        | gnl BL_ORD_ID 18852      cb8564_c84488/flp0/3408<br>isoform=cb8564_c84488;full_length_coverage=1;non_full_length_coverage=0;isoform_length=3408;expected_accuracy=0.996   | 247 | 2854 | 10   | 247  | 790  | 339<br>7 | 1    | 217      |  |
| cb8564_c4643/flp1/2554                                                                                                                         | gnl BL_ORD_ID 12605      cb8564_c147470/flp2/2765<br>isoform=cb8564_c147470;full_length_coverage=1;non_full_length_coverage=2;isoform_length=2765;expected_accuracy=0.992 | 1   | 1705 | 1700 | 2551 | 76   | 178<br>1 | 1914 | 276<br>5 |  |
| cb8564_c73853/flp0/2443<br>isoform=cb8564_c73853;full_length_coverage=1;non_full_length_coverage=0;isoform_length=2443;expected_accuracy=1.000 | gnl BL_ORD_ID 12899      cb8564_c181074/flp0/2725<br>isoform=cb8564_c181074;full_length_coverage=1;non_full_length_coverage=0;isoform_length=2725;expected_accuracy=1.000 | 1   | 1281 | 1276 | 2443 | 1    | 125<br>4 | 1534 | 270<br>4 |  |
| cb18646_c2/flp5/6412<br>isoform=cb18646_c2;full_length_coverage=1;non_full_length_coverage=5;isoform_length=6412;expected_accuracy=0.997       | gnl BL_ORD_ID 34400      cb18646_c6/flp3/6738<br>isoform=cb18646_c6;full_length_coverage=1;non_full_length_coverage=3;isoform_length=6738;expected_accuracy=0.995         | 2   | 6140 | 6140 | 6412 | 3    | 613<br>7 | 6371 | 664<br>4 |  |
| cb2324_c36/flp1/3463                                                                                                                           | gnl BL_ORD_ID 68434 cb2324_c22/flp0/3794                                                                                                                                  | 100 | 3473 | 1    | 100  | 382  | 375<br>1 | 20   | 118      |  |
| cb1163_c19/flp0/3148<br>isoform=cb1163_c19;full_length_coverage=1;non_full_length_coverage=0;isoform_length=3148;expected_accuracy=0.996       | gnl BL_ORD_ID 23459      cb1163_c11/f2p1/3742<br>isoform=cb1163_c11;full_length_coverage=2;non_full_length_coverage=1;isoform_length=3742;expected_accuracy=0.996         | 1   | 1982 | 1981 | 3101 | 522  | 250<br>4 | 2616 | 374<br>2 |  |

|                                                                                                                                                |                                                                                                                                                                      |      |      |      |      |      |          |      |          |  |  |
|------------------------------------------------------------------------------------------------------------------------------------------------|----------------------------------------------------------------------------------------------------------------------------------------------------------------------|------|------|------|------|------|----------|------|----------|--|--|
| racy=0.996                                                                                                                                     | acy=0.999                                                                                                                                                            |      |      |      |      |      |          |      |          |  |  |
| cb415_c102/f1p0/3685                                                                                                                           | gnl BL_ORD_ID 72143 cb415_c84/f1p0/3822                                                                                                                              | 15   | 2090 | 2085 | 3634 | 17   | 210<br>5 | 2225 | 378<br>5 |  |  |
| cb1088_c12/f1p0/2593                                                                                                                           | gnl BL_ORD_ID 2693 cb1088_c21/f6p2/3255<br>isoform=cb1088_c21;full_length_coverage=6;non_full_length_coverage=2;isoform_length=3255;expected_accuracy=1.000          | 1    | 1648 | 1650 | 2496 | 271  | 191<br>9 | 2409 | 325<br>5 |  |  |
| cb8564_c25160/f1p0/3126<br>isoform=cb8564_c25160;full_length_coverage=1;non_full_length_coverage=0;isoform_length=3126;expected_accuracy=0.996 | gnl BL_ORD_ID 13835 cb8564_c22647/f1p0/3442<br>isoform=cb8564_c22647;full_length_coverage=1;non_full_length_coverage=0;isoform_length=3442;expected_accuracy=0.995   | 1199 | 3081 | 1    | 1200 | 1570 | 344<br>2 | 26   | 122<br>2 |  |  |
| cb18275_c11/f1p1/1730                                                                                                                          | gnl BL_ORD_ID 11253 cb8564_c151174/f1p2/2106<br>isoform=cb8564_c151174;full_length_coverage=1;non_full_length_coverage=2;isoform_length=2106;expected_accuracy=0.997 | 131  | 1733 | 1    | 134  | 392  | 199<br>4 | 68   | 202      |  |  |
| cb309_c9/f1p2/4191<br>isoform=cb309_c9;full_length_coverage=1;non_full_length_coverage=2;isoform_length=4191;expected_accuracy=0.998           | gnl BL_ORD_ID 69547 cb309_c21/f1p0/4520                                                                                                                              | 1    | 3777 | 3776 | 4190 | 22   | 377<br>7 | 3986 | 440<br>0 |  |  |
| cb8564_c2579/f1p0/2358                                                                                                                         | gnl BL_ORD_ID 15217 cb8564_c2575/f1p0/3633<br>isoform=cb8564_c2575;full_length_coverage=1;non_full_length_coverage=0;isoform_length=3633;expected_accuracy=0.995     | 1050 | 2369 | 1    | 1050 | 2174 | 349<br>3 | 6    | 106<br>0 |  |  |
| cb2211_c8/f1p0/2631<br>isoform=cb2211_c8;full_length_coverage=1;non_full_length_coverage=0;isoform_length=2631;expected_accuracy=0.996         | gnl BL_ORD_ID 38588 cb2211_c5/f1p0/2638<br>isoform=cb2211_c5;full_length_coverage=1;non_full_length_coverage=0;isoform_length=2638;expected_accuracy=0.997           | 105  | 2535 | 1    | 105  | 207  | 263<br>8 | 1    | 107      |  |  |

|                                                                                                                                                     |                                                                                                                                                                         |     |      |      |      |      |          |      |          |
|-----------------------------------------------------------------------------------------------------------------------------------------------------|-------------------------------------------------------------------------------------------------------------------------------------------------------------------------|-----|------|------|------|------|----------|------|----------|
| acy=0.991<br>cb3971_c4/f1p0/2436<br>isoform=cb3971_c4;full_length_coverage=1;non_full_length_coverage=0;isoform_length=2436;expected_accuracy=0.995 | cy=1.000<br>gnl BL_ORD_ID 71682 cb3971_c1/f1p0/3443                                                                                                                     | 1   | 1594 | 1592 | 2436 | 241  | 183<br>7 | 2317 | 316<br>2 |
| cb8564_c14624/f1p0/1901<br>isoform=cb8564_c14624;full_length_coverage=1;non_full_length_coverage=0;isoform_length=1901;expected_accuracy=0.994      | gnl BL_ORD_ID 11748      cb8564_c12743/f1p0/2150<br>isoform=cb8564_c12743;full_length_coverage=1;non_full_length_coverage=0;isoform_length=2150;expected_accuracy=0.995 | 880 | 1901 | 9    | 881  | 1129 | 215<br>0 | 1    | 892      |
| cb8564_c73422/f1p0/3612                                                                                                                             | gnl BL_ORD_ID 14394      cb8564_c39181/f2p0/3796<br>isoform=cb8564_c39181;full_length_coverage=2;non_full_length_coverage=0;isoform_length=3796;expected_accuracy=0.997 | 1   | 3079 | 3074 | 3608 | 1    | 307<br>7 | 3215 | 376<br>8 |
| cb955_c24/f1p2/2194                                                                                                                                 | gnl BL_ORD_ID 59129 cb955_c25/f1p0/3018                                                                                                                                 | 1   | 1538 | 1538 | 2190 | 120  | 165<br>7 | 2345 | 299<br>7 |
| cb8564_c70156/f1p0/2250<br>isoform=cb8564_c70156;full_length_coverage=1;non_full_length_coverage=0;isoform_length=2250;expected_accuracy=0.996      | gnl BL_ORD_ID 17866      cb8564_c81520/f1p0/2464<br>isoform=cb8564_c81520;full_length_coverage=1;non_full_length_coverage=0;isoform_length=2464;expected_accuracy=1.000 | 110 | 2239 | 1    | 110  | 334  | 246<br>4 | 52   | 162      |
| cb8564_c157572/f1p0/3807<br>isoform=cb8564_c157572;full_length_coverage=1;non_full_length_coverage=0;isoform_length=3807;expected_accuracy=0.994    | gnl BL_ORD_ID 54591 cb8564_c127438/f1p0/3910                                                                                                                            | 316 | 3807 | 118  | 318  | 445  | 393<br>6 | 33   | 232      |
| cb500_c17/f1p0/2323<br>isoform=cb500_c17;full_length_coverage=1;non_full_length_coverage=0;isoform_length=2323;expected_accuracy=0.994              | gnl BL_ORD_ID 72249 cb500_c64/f1p0/4276                                                                                                                                 | 1   | 1293 | 1288 | 2323 | 1520 | 281<br>2 | 2944 | 397<br>9 |



|                                                                                                                                                               |                                                                                                                                                                  |      |      |      |      |      |          |      |          |
|---------------------------------------------------------------------------------------------------------------------------------------------------------------|------------------------------------------------------------------------------------------------------------------------------------------------------------------|------|------|------|------|------|----------|------|----------|
| acy=0.997<br>cb8564_c145840/f9p2/3901<br>isoform=cb8564_c145840;full_length_coverage=9;non_full_length_coverage=2;isoform_length=3901;expected_accuracy=0.999 | gnl BL_ORD_ID 56594 cb8564_c47777/f1p0/4391                                                                                                                      | 228  | 3882 | 15   | 229  | 476  | 413<br>3 | 1    | 215      |
| cb8564_c1783/f1p0/2556                                                                                                                                        | gnl BL_ORD_ID 12956 cb8564_c1771/f3p1/3767<br>isoform=cb8564_c1771;full_length_coverage=3;non_full_length_coverage=1;isoform_length=3767;expected_accuracy=0.996 | 1    | 1222 | 1220 | 2340 | 115  | 133<br>4 | 2646 | 376<br>4 |
| cb16416_c3/f1p0/1533<br>isoform=cb16416_c3;full_length_coverage=1;non_full_length_coverage=0;isoform_length=1533;expected_accuracy=0.998                      | gnl BL_ORD_ID 31689 cb16416_c0/f2p0/1780<br>isoform=cb16416_c0;full_length_coverage=2;non_full_length_coverage=0;isoform_length=1780;expected_accuracy=0.999     | 1    | 1011 | 1006 | 1533 | 4    | 101<br>5 | 1241 | 177<br>0 |
| cb6879_c5/f1p0/2258<br>isoform=cb6879_c5;full_length_coverage=1;non_full_length_coverage=0;isoform_length=2258;expected_accuracy=0.991                        | gnl BL_ORD_ID 47740 cb6879_c1/f1p0/2571                                                                                                                          | 401  | 2258 | 5    | 401  | 723  | 257<br>7 | 29   | 441      |
| cb2918_c67/f1p0/2483<br>isoform=cb2918_c67;full_length_coverage=1;non_full_length_coverage=0;isoform_length=2483;expected_accuracy=1.000                      | gnl BL_ORD_ID 37248 cb2918_c86/f74p0/2712<br>isoform=cb2918_c86;full_length_coverage=74;non_full_length_coverage=0;isoform_length=2712;expected_accuracy=1.000   | 1080 | 2483 | 1    | 1085 | 1309 | 271<br>2 | 69   | 1152     |
| cb8564_c158845/f2p1/2551<br>isoform=cb8564_c158845;full_length_coverage=2;non_full_length_coverage=1;isoform_length=2551;expected_accuracy=0.995              | gnl BL_ORD_ID 19058 cb8564_c9477/f9p0/2721<br>isoform=cb8564_c9477;full_length_coverage=9;non_full_length_coverage=0;isoform_length=2721;expected_accuracy=0.996 | 1    | 2202 | 2200 | 2546 | 55   | 223<br>9 | 2392 | 271<br>8 |
| cb8564_c43779/f1p0/3021                                                                                                                                       | gnl BL_ORD_ID 55521 cb8564_c44014/f1p0/3720                                                                                                                      | 23   | 2344 | 2345 | 3021 | 40   | 235      | 2515 | 319      |

|                                                                                                                     |                     |                         |     |      |      |      |      |      |      |      |
|---------------------------------------------------------------------------------------------------------------------|---------------------|-------------------------|-----|------|------|------|------|------|------|------|
| isoform=cb8564_c43779;full_length_coverage=1;non_full_length_coverage=0;isoform_length=3021;expected_accuracy=0.993 |                     |                         |     |      |      |      |      | 9    | 0    |      |
| cb2661_c14/f6p2/3147                                                                                                |                     |                         |     |      |      |      |      |      |      |      |
| isoform=cb2661_c14;full_length_coverage=6;non_full_length_coverage=2;isoform_length=3147;expected_accuracy=1.000    | gnl BL_ORD_ID 68689 | cb2661_c5/f1p0/3850     | 1   | 2275 | 2276 | 3147 | 37   | 2311 | 2804 | 3675 |
| cb7601_c7/f1p0/1884                                                                                                 | gnl BL_ORD_ID 7860  | cb7601_c1/f3p0/1952     | 1   | 1492 | 1497 | 1805 | 34   | 1525 | 1644 | 1952 |
| isoform=cb7601_c1;full_length_coverage=3;non_full_length_coverage=0;isoform_length=1952;expected_accuracy=1.000     |                     |                         |     |      |      |      |      |      |      |      |
| cb295_c53/f1p0/1719                                                                                                 | gnl BL_ORD_ID 34400 | cb18646_c6/f1p3/6738    | 1   | 1347 | 1347 | 1719 | 4898 | 6245 | 6371 | 6737 |
| isoform=cb295_c53;full_length_coverage=1;non_full_length_coverage=0;isoform_length=1719;expected_accuracy=0.994     |                     |                         |     |      |      |      |      |      |      |      |
| cb3143_c17/f1p0/2870                                                                                                | gnl BL_ORD_ID 36612 | cb3143_c11/f1p1/3005    | 162 | 2870 | 1    | 163  | 294  | 2992 | 21   | 181  |
| isoform=cb3143_c17;full_length_coverage=1;non_full_length_coverage=0;isoform_length=2870;expected_accuracy=0.993    |                     |                         |     |      |      |      |      |      |      |      |
| cb1935_c14/f1p0/3028                                                                                                | gnl BL_ORD_ID 66508 | cb1935_c19/f1p0/3130    | 11  | 1968 | 1963 | 2978 | 12   | 1968 | 2091 | 3106 |
| cb4128_c19/f1p0/2260                                                                                                | gnl BL_ORD_ID 70784 | cb4128_c20/f1p0/3149    | 1   | 1761 | 1760 | 2263 | 28   | 1785 | 2121 | 2625 |
| cb8564_c15608/f1p3/3110                                                                                             | gnl BL_ORD_ID 54322 | cb8564_c22408/f1p2/3368 | 10  | 2790 | 2785 | 3095 | 1    | 2781 | 2925 | 3235 |
| cb8564_c40764/f1p0/2563                                                                                             | gnl BL_ORD_ID 15315 | cb8564_c39014/f1p0/3019 | 1   | 2167 | 2164 | 2563 | 1    | 220  | 2421 | 283  |

|                                                                                                                                                |                                                                                                                                                                                       |     |      |      |      |      |      |      |      |
|------------------------------------------------------------------------------------------------------------------------------------------------|---------------------------------------------------------------------------------------------------------------------------------------------------------------------------------------|-----|------|------|------|------|------|------|------|
| isoform=cb8564_c40764;full_length_coverage=1;non_full_length_coverage=0;isoform_length=2563;expected_accuracy=0.997<br>cb9467_c3/f4p0/2200     | isoform=cb8564_c39014;full_length_coverage=1;non_full_length_coverage=0;isoform_length=3019;expected_accuracy=0.992<br>gnl BL_ORD_ID 21565                      cb9467_c22/f1p0/2220  |     |      |      |      |      | 9    |      | 1    |
| isoform=cb9467_c3;full_length_coverage=4;non_full_length_coverage=0;isoform_length=2200;expected_accuracy=1.000<br>cb7774_c10/f1p0/2476        | isoform=cb9467_c22;full_length_coverage=1;non_full_length_coverage=0;isoform_length=2220;expected_accuracy=0.995<br>gnl BL_ORD_ID 51514   cb7774_c5/f1p0/3020                         | 258 | 2197 | 96   | 257  | 281  | 2220 | 1    | 161  |
| cb1262_c28/f1p1/3930                                                                                                                           | gnl BL_ORD_ID 23602                      cb1262_c27/f1p1/4094                                                                                                                         | 1   | 1551 | 1550 | 2351 | 91   | 1641 | 2241 | 3042 |
| isoform=cb1262_c28;full_length_coverage=1;non_full_length_coverage=1;isoform_length=3930;expected_accuracy=0.994<br>cb8564_c43779/f1p0/3021    | isoform=cb1262_c27;full_length_coverage=1;non_full_length_coverage=1;isoform_length=4094;expected_accuracy=0.996<br>gnl BL_ORD_ID 55522   cb8564_c44123/f1p1/3230                     | 189 | 3744 | 1    | 190  | 529  | 4094 | 32   | 224  |
| isoform=cb8564_c43779;full_length_coverage=1;non_full_length_coverage=0;isoform_length=3021;expected_accuracy=0.993<br>cb8564_c41756/f1p0/2738 | gnl BL_ORD_ID 15154                      cb8564_c32509/f1p1/2880                                                                                                                      | 15  | 2344 | 2345 | 3021 | 15   | 2341 | 2497 | 3171 |
| isoform=cb8564_c41756;full_length_coverage=1;non_full_length_coverage=0;isoform_length=2738;expected_accuracy=0.996<br>cb8942_c20/f1p0/2709    | isoform=cb8564_c32509;full_length_coverage=1;non_full_length_coverage=1;isoform_length=2880;expected_accuracy=0.991<br>gnl BL_ORD_ID 21372                      cb8942_c67/f49p2/2933 | 11  | 2173 | 2170 | 2713 | 2    | 2207 | 2330 | 2877 |
| isoform=cb8942_c67;full_length_coverage=49;non_full_length_coverage=2;isoform_length=2933;expected_accuracy=1.000<br>cb4016_c16/f3p2/2553      | gnl BL_ORD_ID 71722   cb4016_c5/f1p0/3485                                                                                                                                             | 219 | 2678 | 1    | 224  | 473  | 2932 | 90   | 315  |
|                                                                                                                                                |                                                                                                                                                                                       | 121 | 1787 | 1787 | 2553 | 1008 | 267  | 2783 | 354  |

|                                                                                                                      |                                                                                                                    |                         |     |      |      |      |      |      |      |      |
|----------------------------------------------------------------------------------------------------------------------|--------------------------------------------------------------------------------------------------------------------|-------------------------|-----|------|------|------|------|------|------|------|
| isoform=cb4016_c16;full_length_coverage=3;non_full_length_coverage=2;isoform_length=2553;expected_accuracy=0.996     |                                                                                                                    |                         |     |      |      |      |      | 5    |      | 9    |
| cb8564_c1780/f1p1/3143                                                                                               | gnl BL_ORD_ID 12956                                                                                                | cb8564_c1771/f3p1/3767  |     |      |      |      |      |      |      |      |
| isoform=cb8564_c1780;full_length_coverage=1;non_full_length_coverage=1;isoform_length=3143;expected_accuracy=0.995   | isoform=cb8564_c1771;full_length_coverage=3;non_full_length_coverage=1;isoform_length=3767;expected_accuracy=0.996 |                         | 192 | 3110 | 1    | 194  | 849  | 3767 | 119  | 312  |
| cb8564_c40764/f1p0/2563                                                                                              | gnl BL_ORD_ID 55327                                                                                                | cb8564_c38462/f1p0/3241 |     |      |      |      |      |      |      |      |
| isoform=cb8564_c40764;full_length_coverage=1;non_full_length_coverage=0;isoform_length=2563;expected_accuracy=0.997  |                                                                                                                    |                         | 1   | 2166 | 2162 | 2563 | 1    | 2154 | 2362 | 2762 |
| cb4067_c11/f1p0/2801                                                                                                 | gnl BL_ORD_ID 71765                                                                                                | cb4067_c2/f1p1/3451     |     |      |      |      |      |      |      |      |
|                                                                                                                      |                                                                                                                    |                         | 231 | 2802 | 1    | 228  | 820  | 3391 | 77   | 304  |
| cb8564_c188097/f1p0/2552                                                                                             | gnl BL_ORD_ID 54246                                                                                                | cb8564_c21138/f1p3/2652 |     |      |      |      |      |      |      |      |
| isoform=cb8564_c188097;full_length_coverage=1;non_full_length_coverage=0;isoform_length=2552;expected_accuracy=0.996 |                                                                                                                    |                         | 1   | 1945 | 1940 | 2496 | 1    | 1942 | 2045 | 2600 |
| cb848_c2/f2p2/3920                                                                                                   | gnl BL_ORD_ID 51017                                                                                                | cb848_c11/f1p1/4011     |     |      |      |      |      |      |      |      |
| isoform=cb848_c2;full_length_coverage=2;non_full_length_coverage=2;isoform_length=3920;expected_accuracy=0.993       |                                                                                                                    |                         | 1   | 3501 | 3500 | 3899 | 23   | 3516 | 3627 | 4025 |
| cb5714_c6/f1p0/1426                                                                                                  | gnl BL_ORD_ID 45534                                                                                                | cb5714_c2/f1p0/2670     |     |      |      |      |      |      |      |      |
| isoform=cb5714_c6;full_length_coverage=1;non_full_length_coverage=0;isoform_length=1426;expected_accuracy=0.996      | isoform=cb5714_c2;full_length_coverage=1;non_full_length_coverage=0;isoform_length=2670;expected_accuracy=0.998    |                         | 263 | 1426 | 32   | 265  | 1506 | 2669 | 1    | 234  |
| cb2744_c3/f1p0/1362                                                                                                  | gnl BL_ORD_ID 38153                                                                                                | cb2744_c0/f1p1/3821     |     |      |      |      |      |      |      |      |
|                                                                                                                      |                                                                                                                    |                         | 1   | 1042 | 1042 | 1362 | 196  | 123  | 1877 | 219  |

|                                                                                                                                               |                                                                                                                                                                                          |      |      |      |      |      |          |      |          |
|-----------------------------------------------------------------------------------------------------------------------------------------------|------------------------------------------------------------------------------------------------------------------------------------------------------------------------------------------|------|------|------|------|------|----------|------|----------|
| isoform=cb2744_c3;full_length_coverage=1;non_full_length_coverage=0;isoform_length=1362;expected_accuracy=0.991<br>cb1115_c11/f6p4/3674       | isoform=cb2744_c0;full_length_coverage=1;non_full_length_coverage=1;isoform_length=3821;expected_accuracy=0.997<br>gnl BL_ORD_ID 3245                      cb1115_c1/f1p1/4461           |      |      |      |      |      | 9        |      | 7        |
| isoform=cb1115_c11;full_length_coverage=6;non_full_length_coverage=4;isoform_length=3674;expected_accuracy=1.000<br>cb8564_c4691/f1p0/3446    | isoform=cb1115_c1;full_length_coverage=1;non_full_length_coverage=1;isoform_length=4461;expected_accuracy=0.994<br>gnl BL_ORD_ID 15232                      cb8564_c4689/f1p0/4442       | 1647 | 3666 | 119  | 1649 | 2445 | 446<br>1 | 1    | 152<br>9 |
| isoform=cb8564_c4691;full_length_coverage=1;non_full_length_coverage=0;isoform_length=3446;expected_accuracy=0.992<br>cb8564_c82539/f7p3/2550 | isoform=cb8564_c4689;full_length_coverage=1;non_full_length_coverage=0;isoform_length=4442;expected_accuracy=0.997<br>gnl BL_ORD_ID 16732                      cb8564_c71389/f1p1/2659   | 1    | 3048 | 3045 | 3443 | 1    | 304<br>2 | 4012 | 439<br>4 |
| cb8564_c82539/f7p3/2550                                                                                                                       | isoform=cb8564_c71389;full_length_coverage=1;non_full_length_coverage=1;isoform_length=2659;expected_accuracy=0.994<br>gnl BL_ORD_ID 11241                      cb8564_c145555/f2p1/3366 | 1    | 1356 | 1352 | 2471 | 2    | 136<br>1 | 1538 | 265<br>6 |
| cb8564_c72349/f1p0/3248                                                                                                                       | isoform=cb8564_c145555;full_length_coverage=2;non_full_length_coverage=1;isoform_length=3366;expected_accuracy=0.997<br>gnl BL_ORD_ID 39579                      cb3281_c6/f1p0/2227     | 1    | 2662 | 2659 | 3068 | 62   | 272<br>3 | 2882 | 329<br>1 |
| cb3281_c0/f4p0/1900                                                                                                                           | isoform=cb3281_c6;full_length_coverage=1;non_full_length_coverage=0;isoform_length=2227;expected_accuracy=0.997                                                                          | 1    | 1183 | 1180 | 1895 | 68   | 125<br>1 | 1513 | 222<br>7 |
| cb18456_c1776/f1p0/1211                                                                                                                       | gnl BL_ORD_ID 69242   cb18456_c1755/f1p0/1422                                                                                                                                            | 280  | 1214 | 6    | 285  | 394  | 132<br>8 | 3    | 282      |
| cb233_c13/f1p0/2651                                                                                                                           | gnl BL_ORD_ID 38487                      cb233_c6/f2p1/3007                                                                                                                              | 377  | 2651 | 4    | 382  | 684  | 296      | 28   | 408      |

|                                                                                                                 |                                                                                                                                                                                     |      |      |      |      |      |      |      |      |  |
|-----------------------------------------------------------------------------------------------------------------|-------------------------------------------------------------------------------------------------------------------------------------------------------------------------------------|------|------|------|------|------|------|------|------|--|
| isoform=cb233_c13;full_length_coverage=1;non_full_length_coverage=0;isoform_length=2651;expected_accuracy=0.992 | isoform=cb233_c6;full_length_coverage=2;non_full_length_coverage=1;isoform_length=3007;expected_accuracy=0.998                                                                      |      |      |      |      |      |      | 6    |      |  |
| cb1691_c9/f1p0/2851                                                                                             | gnl BL_ORD_ID 32447                      cb1691_c22/f1p0/3569<br>isoform=cb1691_c22;full_length_coverage=1;non_full_length_coverage=0;isoform_length=3569;expected_accuracy=0.999   | 1256 | 2807 | 1    | 1257 | 2019 | 3569 | 1    | 1257 |  |
| cb14859_c10/f1p0/5042                                                                                           | gnl BL_ORD_ID 30141                      cb14859_c7/f1p3/5317<br>isoform=cb14859_c7;full_length_coverage=1;non_full_length_coverage=3;isoform_length=5317;expected_accuracy=0.995   | 1404 | 4810 | 1    | 1407 | 1913 | 5317 | 78   | 1486 |  |
| cb5643_c112/f1p0/1970                                                                                           | gnl BL_ORD_ID 46678                      cb5643_c124/f5p1/2491<br>isoform=cb5643_c124;full_length_coverage=5;non_full_length_coverage=1;isoform_length=2491;expected_accuracy=0.997 | 1    | 1433 | 1434 | 1970 | 53   | 1475 | 1871 | 2401 |  |
| cb500_c43/f1p0/3109                                                                                             | gnl BL_ORD_ID 42492                      cb500_c6/f4p0/3398<br>isoform=cb500_c6;full_length_coverage=4;non_full_length_coverage=0;isoform_length=3398;expected_accuracy=1.000       | 1    | 2306 | 2303 | 3109 | 94   | 2408 | 2540 | 3347 |  |
| cb8564_c51223/f1p4/1975                                                                                         | gnl BL_ORD_ID 54351                      cb8564_c22815/f1p0/4618                                                                                                                    | 207  | 1937 | 21   | 208  | 2508 | 4238 | 79   | 266  |  |
| cb6320_c0/f6p0/1902                                                                                             | gnl BL_ORD_ID 5687                      cb6320_c2/f1p0/2874<br>isoform=cb6320_c2;full_length_coverage=1;non_full_length_coverage=0;isoform_length=2874;expected_accuracy=0.995      | 1    | 1257 | 1253 | 1901 | 31   | 1283 | 2226 | 2874 |  |
| cb427_c10/f1p0/1930                                                                                             | gnl BL_ORD_ID 43369                      cb427_c7/f2p0/4808                                                                                                                         | 1    | 1561 | 1560 | 1928 | 18   | 157  | 3184 | 355  |  |

|                                                                                                                 |                                                                                                                  |     |      |      |      |     |      |      |      |
|-----------------------------------------------------------------------------------------------------------------|------------------------------------------------------------------------------------------------------------------|-----|------|------|------|-----|------|------|------|
| isoform=cb427_c10;full_length_coverage=1;non_full_length_coverage=0;isoform_length=1930;expected_accuracy=0.996 | isoform=cb427_c7;full_length_coverage=2;non_full_length_coverage=0;isoform_length=4808;expected_accuracy=0.998   |     |      |      |      |     |      | 0    | 0    |
| cb1193_c34/f1p0/4247                                                                                            | gnl BL_ORD_ID 59249 cb1193_c13/f1p1/3683                                                                         | 2   | 2038 | 2036 | 3564 | 1   | 2033 | 2158 | 3686 |
| cb8564_c40598/f1p4/3119                                                                                         | gnl BL_ORD_ID 55623 cb8564_c47027/f1p0/3544                                                                      | 1   | 2732 | 2729 | 3054 | 1   | 2755 | 2876 | 3201 |
| cb8564_c38035/f1p0/2770                                                                                         | gnl BL_ORD_ID 57176 cb8564_c85665/f1p0/3087                                                                      | 14  | 2035 | 2033 | 2755 | 2   | 2048 | 2238 | 2965 |
| cb3773_c9/f1p0/2032                                                                                             | gnl BL_ORD_ID 40493 cb3773_c4/f1p1/2259                                                                          |     |      |      |      |     |      |      |      |
| isoform=cb3773_c9;full_length_coverage=1;non_full_length_coverage=0;isoform_length=2032;expected_accuracy=0.995 | isoform=cb3773_c4;full_length_coverage=1;non_full_length_coverage=1;isoform_length=2259;expected_accuracy=0.995  | 1   | 1355 | 1355 | 2032 | 1   | 1352 | 1454 | 2131 |
| cb135_c26/f1p0/3634                                                                                             | gnl BL_ORD_ID 27202 cb135_c17/f1p0/4316                                                                          |     |      |      |      |     |      |      |      |
|                                                                                                                 | isoform=cb135_c17;full_length_coverage=1;non_full_length_coverage=0;isoform_length=4316;expected_accuracy=0.995  | 1   | 2610 | 2609 | 3662 | 1   | 2598 | 3236 | 4286 |
| cb3406_c10/f1p0/2005                                                                                            | gnl BL_ORD_ID 40557 cb3406_c11/f1p0/2573                                                                         |     |      |      |      |     |      |      |      |
|                                                                                                                 | isoform=cb3406_c11;full_length_coverage=1;non_full_length_coverage=0;isoform_length=2573;expected_accuracy=0.992 | 179 | 1922 | 12   | 179  | 832 | 2573 | 1    | 167  |
| cb6518_c6/f1p0/2920                                                                                             | gnl BL_ORD_ID 5046 cb6518_c8/f1p0/3970                                                                           |     |      |      |      |     |      |      |      |
| isoform=cb6518_c6;full_length_coverage=1;non_full_length_coverage=0;isoform_length=2920;expected_accuracy=0.997 | isoform=cb6518_c8;full_length_coverage=1;non_full_length_coverage=0;isoform_length=3970;expected_accuracy=0.991  | 1   | 1982 | 1980 | 2866 | 1   | 1973 | 3080 | 3970 |
| cb3747_c11/f1p0/2520                                                                                            | gnl BL_ORD_ID 39414 cb3747_c3/f6p1/2970                                                                          |     |      |      |      |     |      |      |      |
|                                                                                                                 |                                                                                                                  | 1   | 1743 | 1742 | 2520 | 11  | 177  | 2010 | 278  |

|                                                                                                                  |                                                                                                                   |      |      |      |      |      |      |      |     |   |
|------------------------------------------------------------------------------------------------------------------|-------------------------------------------------------------------------------------------------------------------|------|------|------|------|------|------|------|-----|---|
| isoform=cb3747_c11;full_length_coverage=1;non_full_length_coverage=0;isoform_length=2520;expected_accuracy=0.994 | isoform=cb3747_c3;full_length_coverage=6;non_full_length_coverage=1;isoform_length=2970;expected_accuracy=1.000   |      |      |      |      |      |      | 7    |     | 8 |
| cb7377_c9/f1p0/2341                                                                                              | gnl BL_ORD_ID 51155 cb7377_c0/f1p0/2631                                                                           | 162  | 2233 | 1    | 162  | 511  | 258  | 127  | 289 |   |
| cb7359_c4/f1p0/2420                                                                                              | gnl BL_ORD_ID 51144 cb7359_c2/f1p0/2609                                                                           | 318  | 2269 | 4    | 320  | 589  | 254  | 150  | 466 |   |
| cb3281_c8/f1p0/2225                                                                                              | gnl BL_ORD_ID 39582 cb3281_c5/f1p0/2482                                                                           |      |      |      |      |      |      |      |     |   |
| isoform=cb3281_c8;full_length_coverage=1;non_full_length_coverage=0;isoform_length=2225;expected_accuracy=0.996  | isoform=cb3281_c5;full_length_coverage=1;non_full_length_coverage=0;isoform_length=2482;expected_accuracy=0.995   | 1087 | 2201 | 1    | 1090 | 1357 | 248  | 5    | 109 | 5 |
| cb2927_c1/f2p1/2815                                                                                              | gnl BL_ORD_ID 37697 cb2927_c6/f1p1/3514                                                                           |      |      |      |      |      |      |      |     |   |
| isoform=cb2927_c1;full_length_coverage=2;non_full_length_coverage=1;isoform_length=2815;expected_accuracy=0.994  | isoform=cb2927_c6;full_length_coverage=1;non_full_length_coverage=1;isoform_length=3514;expected_accuracy=0.996   | 1    | 1658 | 1654 | 2808 | 32   | 1711 | 2359 | 351 | 4 |
| cb6365_c8/f1p1/2052                                                                                              | gnl BL_ORD_ID 49655 cb6365_c12/f1p0/2331                                                                          |      |      |      |      |      |      |      |     |   |
| isoform=cb6365_c8;full_length_coverage=1;non_full_length_coverage=1;isoform_length=2052;expected_accuracy=0.997  |                                                                                                                   | 10   | 1762 | 1762 | 2050 | 10   | 176  | 2044 | 233 | 2 |
| cb3716_c27/f1p2/1719                                                                                             | gnl BL_ORD_ID 40690 cb3716_c31/f1p2/1866                                                                          |      |      |      |      |      |      |      |     |   |
| isoform=cb3716_c27;full_length_coverage=1;non_full_length_coverage=2;isoform_length=1719;expected_accuracy=0.997 | isoform=cb3716_c31;full_length_coverage=11;non_full_length_coverage=2;isoform_length=1866;expected_accuracy=1.000 | 1    | 1492 | 1492 | 1719 | 31   | 152  | 1635 | 186 | 3 |
| cb8564_c119745/f1p1/2751                                                                                         | gnl BL_ORD_ID 16193 cb8564_c76962/f1p2/3049                                                                       |      |      |      |      |      |      |      |     |   |
| isoform=cb8564_c119745;full_length_coverage=1;non_full_length_coverage=1;isoform_length=2751;expected            | isoform=cb8564_c76962;full_length_coverage=1;non_full_length_coverage=2;isoform_length=3049;expected_ac           | 1    | 1745 | 1745 | 2684 | 2    | 173  | 2113 | 304 | 9 |



|                                                                                                                                                                                                                                                                                                           |                                                                                                                                                                                                                                                 |     |      |      |      |      |          |      |          |
|-----------------------------------------------------------------------------------------------------------------------------------------------------------------------------------------------------------------------------------------------------------------------------------------------------------|-------------------------------------------------------------------------------------------------------------------------------------------------------------------------------------------------------------------------------------------------|-----|------|------|------|------|----------|------|----------|
| _accuracy=0.992<br>cb9143_c30/f2p0/2817<br>isoform=cb9143_c30;full_length_coverage=2;non_full_length_coverage=0;isoform_length=2817;expected_accuracy=0.996<br>cb13938_c20/f1p0/1134<br>isoform=cb13938_c20;full_length_coverage=1;non_full_length_coverage=0;isoform_length=1134;expected_accuracy=1.000 | curacy=0.997<br>gnl BL_ORD_ID 19844                      cb9143_c57/f1p0/3069<br>isoform=cb9143_c57;full_length_coverage=1;non_full_length_coverage=0;isoform_length=3069;expected_accuracy=1.000<br>gnl BL_ORD_ID 72020   cb4825_c11/f1p0/4859 | 199 | 2817 | 1    | 203  | 441  | 305<br>4 | 105  | 307      |
| cb9612_c1/f1p0/2025<br>cb7786_c9/f1p1/2310<br>isoform=cb7786_c9;full_length_coverage=1;non_full_length_coverage=1;isoform_length=2310;expected_accuracy=0.995                                                                                                                                             | gnl BL_ORD_ID 59850   cb9612_c2/f1p0/2534<br>gnl BL_ORD_ID 6654                      cb7786_c5/f1p1/2527<br>isoform=cb7786_c5;full_length_coverage=1;non_full_length_coverage=1;isoform_length=2527;expected_accuracy=0.999                     | 1   | 1606 | 1601 | 1980 | 15   | 1611     | 1894 | 227<br>2 |
| cb8564_c122989/f1p0/4055<br>cb8564_c42814/f1p0/2151<br>isoform=cb8564_c42814;full_length_coverage=1;non_full_length_coverage=0;isoform_length=2151;expected_accuracy=0.993                                                                                                                                | gnl BL_ORD_ID 10539      cb8564_c109091/f5p0/3765<br>isoform=cb8564_c109091;full_length_coverage=5;non_full_length_coverage=0;isoform_length=3765;expected_accuracy=1.000<br>gnl BL_ORD_ID 55866   cb8564_c47522/f1p0/2954                      | 1   | 2587 | 2589 | 3750 | 139  | 272<br>5 | 2601 | 376<br>2 |
| cb6629_c5/f1p2/1294<br>isoform=cb6629_c5;full_length_coverage=1;non_full_length_coverage=2;isoform_length=1294;expected_accuracy=0.993                                                                                                                                                                    | gnl BL_ORD_ID 4820                      cb6629_c2/f1p1/2552<br>isoform=cb6629_c2;full_length_coverage=1;non_full_length_coverage=1;isoform_length=2552;expected_accuracy=1.000                                                                  | 650 | 2151 | 7    | 652  | 1343 | 284<br>7 | 1    | 655      |
|                                                                                                                                                                                                                                                                                                           |                                                                                                                                                                                                                                                 | 9   | 781  | 778  | 1292 | 15   | 788      | 2040 | 255<br>0 |

|                                                                                                                                                             |                                                                                                                                                                                     |     |      |      |      |      |          |      |          |
|-------------------------------------------------------------------------------------------------------------------------------------------------------------|-------------------------------------------------------------------------------------------------------------------------------------------------------------------------------------|-----|------|------|------|------|----------|------|----------|
| acy=1.000<br>cb8564_c46212/f3p1/4373<br>isoform=cb8564_c46212;full_length_coverage=3;non_full_length_coverage=1;isoform_length=4373;expected_accuracy=0.999 | cy=0.998<br>gnl BL_ORD_ID 14819      cb8564_c40333/f1p2/4446<br>isoform=cb8564_c40333;full_length_coverage=1;non_full_length_coverage=2;isoform_length=4446;expected_accuracy=0.998 | 184 | 4322 | 14   | 185  | 280  | 444<br>6 | 1    | 165      |
| cb8564_c45300/f1p4/3014<br>isoform=cb8564_c45300;full_length_coverage=1;non_full_length_coverage=4;isoform_length=3014;expected_accuracy=0.996              | gnl BL_ORD_ID 14471      cb8564_c34518/f1p0/3136<br>isoform=cb8564_c34518;full_length_coverage=1;non_full_length_coverage=0;isoform_length=3136;expected_accuracy=0.991             | 243 | 3014 | 1    | 246  | 393  | 313<br>4 | 1    | 238      |
| cb8564_c44698/f1p5/2843<br>isoform=cb8564_c44698;full_length_coverage=1;non_full_length_coverage=5;isoform_length=2843;expected_accuracy=0.997              | gnl BL_ORD_ID 15994      cb8564_c54019/f1p1/2940<br>isoform=cb8564_c54019;full_length_coverage=1;non_full_length_coverage=1;isoform_length=2940;expected_accuracy=0.991             | 1   | 2516 | 2511 | 2834 | 7    | 249<br>8 | 2619 | 294<br>0 |
| cb18456_c6530/f1p0/1200                                                                                                                                     | gnl BL_ORD_ID 67487      cb18456_c4043/f1p0/1830                                                                                                                                    | 260 | 1161 | 3    | 259  | 794  | 169<br>4 | 8    | 264      |
| cb5896_c76/f1p0/4056                                                                                                                                        | gnl BL_ORD_ID 44038      cb4253_c10/f1p0/5750<br>isoform=cb4253_c10;full_length_coverage=1;non_full_length_coverage=0;isoform_length=5750;expected_accuracy=0.995                   | 336 | 3654 | 19   | 338  | 2428 | 575<br>0 | 1    | 320      |
| cb7521_c46/f1p0/2168                                                                                                                                        | gnl BL_ORD_ID 7810      cb7521_c1/f5p2/2475<br>isoform=cb7521_c1;full_length_coverage=5;non_full_length_coverage=2;isoform_length=2475;expected_accuracy=1.000                      | 1   | 1630 | 1626 | 2043 | 210  | 183<br>9 | 2040 | 245<br>8 |
| cb8564_c36056/f1p0/2652<br>isoform=cb8564_c36056;full_length_coverage=1;non_full_length_coverage=0;isoform_length=2652;expected_                            | gnl BL_ORD_ID 55873      cb8564_c47701/f1p0/3144                                                                                                                                    | 248 | 2651 | 1    | 251  | 476  | 288<br>0 | 82   | 332      |

---

|                          |                                                                                                                                                                           |     |      |      |      |     |      |      |      |  |  |  |
|--------------------------|---------------------------------------------------------------------------------------------------------------------------------------------------------------------------|-----|------|------|------|-----|------|------|------|--|--|--|
| accuracy=0.999           |                                                                                                                                                                           |     |      |      |      |     |      |      |      |  |  |  |
| cb18301_c34/f1p0/1551    | gnl BL_ORD_ID 12295      cb8564_c123425/f1p0/2833<br>isoform=cb8564_c123425;full_length_coverage=1;non_full_length_coverage=0;isoform_length=2833;expected_accuracy=0.994 | 1   | 1075 | 1072 | 1468 | 14  | 1085 | 2437 | 2833 |  |  |  |
| cb8564_c188097/f1p0/2552 | gnl BL_ORD_ID 55935      cb8564_c49443/f1p0/2984<br>isoform=cb8564_c188097;full_length_coverage=1;non_full_length_coverage=0;isoform_length=2552;expected_accuracy=0.996  | 1   | 1945 | 1940 | 2543 | 35  | 1979 | 2080 | 2681 |  |  |  |
| cb6033_c2/f1p0/1294      | gnl BL_ORD_ID 46393      cb6033_c1/f1p0/2556<br>isoform=cb6033_c2;full_length_coverage=1;non_full_length_coverage=0;isoform_length=1294;expected_accuracy=0.998           | 1   | 1065 | 1063 | 1294 | 968 | 2038 | 2323 | 2553 |  |  |  |
| cb8564_c74699/f1p0/3492  | gnl BL_ORD_ID 57694      cb8564_c78332/f1p0/4781                                                                                                                          | 20  | 2738 | 2736 | 3461 | 12  | 2742 | 3636 | 4361 |  |  |  |
| cb401_c50/f1p0/2173      | gnl BL_ORD_ID 70875      cb401_c74/f1p1/2481<br>isoform=cb401_c50;full_length_coverage=1;non_full_length_coverage=0;isoform_length=2173;expected_accuracy=0.998           | 96  | 2171 | 1    | 101  | 290 | 2383 | 49   | 149  |  |  |  |
| cb8564_c75977/f1p0/2165  | gnl BL_ORD_ID 17175      cb8564_c90057/f1p0/3709<br>isoform=cb8564_c90057;full_length_coverage=1;non_full_length_coverage=0;isoform_length=3709;expected_accuracy=0.997   | 1   | 1393 | 1394 | 2124 | 60  | 1451 | 2981 | 3709 |  |  |  |
| cb1788_c6/f1p0/3148      | gnl BL_ORD_ID 31766      cb1788_c1/f1p0/3299<br>isoform=cb1788_c1;full_length_coverage=1;non_full_length_coverage=0;isoform_length=3299;expected_accuracy=0.999           | 146 | 3063 | 1    | 145  | 295 | 3208 | 1    | 145  |  |  |  |

---

|                                                                                                                                        |                                                                                                                                                              |      |      |      |      |      |          |      |          |  |
|----------------------------------------------------------------------------------------------------------------------------------------|--------------------------------------------------------------------------------------------------------------------------------------------------------------|------|------|------|------|------|----------|------|----------|--|
|                                                                                                                                        | cy=0.992                                                                                                                                                     |      |      |      |      |      |          |      |          |  |
| cb466_c12/f1p0/3253<br>isoform=cb466_c12;full_length_coverage=1;non_full_length_coverage=0;isoform_length=3253;expected_accuracy=0.991 | gnl BL_ORD_ID 72211 cb466_c17/f1p0/4598                                                                                                                      | 1135 | 3123 | 1    | 1133 | 1870 | 386<br>5 | 48   | 1178     |  |
| cb1626_c16/f1p0/2872                                                                                                                   | gnl BL_ORD_ID 33068 cb1626_c13/f1p0/4596<br>isoform=cb1626_c13;full_length_coverage=1;non_full_length_coverage=0;isoform_length=4596;expected_accuracy=1.000 | 1003 | 2842 | 1    | 1003 | 2692 | 453<br>0 | 78   | 107<br>9 |  |
| cb1468_c12/f1p1/3132                                                                                                                   | gnl BL_ORD_ID 63645 cb1468_c3/f1p0/4312                                                                                                                      | 1    | 2095 | 2094 | 2905 | 46   | 214<br>0 | 3043 | 385<br>5 |  |
| cb7126_c3/f1p0/2121<br>isoform=cb7126_c3;full_length_coverage=1;non_full_length_coverage=0;isoform_length=2121;expected_accuracy=0.998 | gnl BL_ORD_ID 47851 cb7126_c4/f1p0/2520                                                                                                                      | 122  | 2121 | 1    | 125  | 272  | 227<br>5 | 1    | 134      |  |
| cb1626_c16/f1p0/2872                                                                                                                   | gnl BL_ORD_ID 32074 cb1626_c4/f2p1/4537<br>isoform=cb1626_c4;full_length_coverage=2;non_full_length_coverage=1;isoform_length=4537;expected_accuracy=0.998   | 1003 | 2842 | 1    | 1003 | 2635 | 446<br>9 | 55   | 106<br>9 |  |
| cb9009_c2/f8p1/1614<br>isoform=cb9009_c2;full_length_coverage=8;non_full_length_coverage=1;isoform_length=1614;expected_accuracy=0.996 | gnl BL_ORD_ID 20136 cb9009_c6/f1p0/4294<br>isoform=cb9009_c6;full_length_coverage=1;non_full_length_coverage=0;isoform_length=4294;expected_accuracy=0.992   | 1    | 1190 | 1188 | 1614 | 1    | 1179     | 3472 | 389<br>8 |  |
| cb8564_c4159/f1p2/3687<br>isoform=cb8564_c4159;full_length_coverage=1;non_full_length_coverage=2;isoform_length=3687;expected_ac       | gnl BL_ORD_ID 17221 cb8564_c945/f5p5/4929<br>isoform=cb8564_c945;full_length_coverage=5;non_full_length_coverage=5;isoform_length=4929;expected_acc          | 1    | 2927 | 2923 | 3687 | 57   | 298<br>2 | 4164 | 492<br>7 |  |

|                         |                                                                                                                                                                                         |     |      |      |      |      |          |      |          |  |
|-------------------------|-----------------------------------------------------------------------------------------------------------------------------------------------------------------------------------------|-----|------|------|------|------|----------|------|----------|--|
| curacy=0.999            | uracy=1.000                                                                                                                                                                             |     |      |      |      |      |          |      |          |  |
| cb6499_c24/f1p0/1697    | gnl BL_ORD_ID 5990                      cb6499_c15/f1p1/1972<br>isoform=cb6499_c15;full_length_coverage=1;non_full_length_coverage=1;isoform_length=1972;expected_accuracy=0.994        | 1   | 1336 | 1333 | 1658 | 8    | 134<br>2 | 1581 | 190<br>6 |  |
| cb6340_c37/f1p2/2383    | gnl BL_ORD_ID 47442   cb6340_c10/f1p0/2833<br>isoform=cb6340_c37;full_length_coverage=1;non_full_length_coverage=2;isoform_length=2383;expected_accuracy=0.994                          | 223 | 2314 | 1    | 228  | 497  | 259<br>0 | 98   | 325      |  |
| cb8564_c18575/f1p0/1939 | gnl BL_ORD_ID 13824                      cb8564_c20404/f1p3/3974<br>isoform=cb8564_c18575;full_length_coverage=1;non_full_length_coverage=0;isoform_length=1939;expected_accuracy=0.990 | 1   | 1427 | 1422 | 1939 | 774  | 221<br>3 | 3194 | 371<br>8 |  |
| cb13025_c13/f1p0/1286   | gnl BL_ORD_ID 27037                      cb13025_c3/f2p1/1451<br>isoform=cb13025_c3;full_length_coverage=2;non_full_length_coverage=1;isoform_length=1451;expected_accuracy=1.000       | 244 | 1285 | 41   | 243  | 395  | 145<br>1 | 1    | 203      |  |
| cb8564_c42409/f1p0/3007 | gnl BL_ORD_ID 55844   cb8564_c44552/f1p0/3216                                                                                                                                           | 108 | 1939 | 1936 | 2893 | 94   | 192<br>9 | 2069 | 302<br>8 |  |
| cb12038_c22/f5p6/1857   | gnl BL_ORD_ID 18863                      cb8564_c82439/f1p4/3856<br>isoform=cb12038_c22;full_length_coverage=5;non_full_length_coverage=6;isoform_length=1857;expected_accuracy=1.000   | 342 | 1857 | 76   | 344  | 2343 | 385<br>5 | 5    | 276      |  |
| cb8564_c40996/f1p0/1966 | gnl BL_ORD_ID 55939   cb8564_c49630/f1p4/3487<br>isoform=cb8564_c40996;full_length_coverage=1;non_full_length_coverage=0;isoform_length=1966;expected_                                  | 1   | 1700 | 1700 | 1955 | 1230 | 291<br>3 | 3243 | 349<br>3 |  |

|                                                                                                                      |                                                                                                                      |                          |      |      |      |      |      |      |      |      |
|----------------------------------------------------------------------------------------------------------------------|----------------------------------------------------------------------------------------------------------------------|--------------------------|------|------|------|------|------|------|------|------|
| accuracy=0.991                                                                                                       |                                                                                                                      |                          |      |      |      |      |      |      |      |      |
| cb8564_c110053/f2p0/2311                                                                                             | gnl BL_ORD_ID 9253                                                                                                   | cb8564_c121717/f1p0/2419 |      |      |      |      |      |      |      |      |
| isoform=cb8564_c110053;full_length_coverage=2;non_full_length_coverage=0;isoform_length=2311;expected_accuracy=0.996 | isoform=cb8564_c121717;full_length_coverage=1;non_full_length_coverage=0;isoform_length=2419;expected_accuracy=0.999 |                          | 1027 | 2311 | 1    | 1032 | 1132 | 2418 | 1    | 1028 |
| cb396_c57/f1p0/2029                                                                                                  | gnl BL_ORD_ID 70867                                                                                                  | cb396_c51/f1p1/2465      |      |      |      |      |      |      |      |      |
| isoform=cb396_c57;full_length_coverage=1;non_full_length_coverage=0;isoform_length=2029;expected_accuracy=0.995      |                                                                                                                      |                          | 1    | 1399 | 1395 | 2029 | 12   | 1411 | 1672 | 2307 |
| cb8564_c90747/f1p0/2795                                                                                              | gnl BL_ORD_ID 9350                                                                                                   | cb8564_c11826/f1p0/2916  |      |      |      |      |      |      |      |      |
|                                                                                                                      | isoform=cb8564_c11826;full_length_coverage=1;non_full_length_coverage=0;isoform_length=2916;expected_accuracy=0.997  |                          | 1    | 1295 | 1294 | 2640 | 4    | 1296 | 1543 | 2916 |
| cb8564_c45242/f1p0/2126                                                                                              | gnl BL_ORD_ID 15226                                                                                                  | cb8564_c34123/f2p0/3784  |      |      |      |      |      |      |      |      |
| isoform=cb8564_c45242;full_length_coverage=1;non_full_length_coverage=0;isoform_length=2126;expected_accuracy=0.990  | isoform=cb8564_c34123;full_length_coverage=2;non_full_length_coverage=0;isoform_length=3784;expected_accuracy=1.000  |                          | 320  | 2126 | 71   | 321  | 1969 | 3784 | 1101 | 1351 |
| cb1224_c13/f1p1/3758                                                                                                 | gnl BL_ORD_ID 24622                                                                                                  | cb1224_c6/f1p0/4422      |      |      |      |      |      |      |      |      |
|                                                                                                                      | isoform=cb1224_c6;full_length_coverage=1;non_full_length_coverage=0;isoform_length=4422;expected_accuracy=0.997      |                          | 1    | 2859 | 2863 | 3552 | 690  | 3548 | 3728 | 4422 |
| cb3907_c5/f1p0/2446                                                                                                  | gnl BL_ORD_ID 71631                                                                                                  | cb3907_c10/f1p0/2898     |      |      |      |      |      |      |      |      |
| isoform=cb3907_c5;full_length_coverage=1;non_full_length_coverage=0;isoform_length=2446;expected_accuracy=0.994      |                                                                                                                      |                          | 225  | 2420 | 1    | 225  | 450  | 2642 | 6    | 234  |
| cb1333_c9/f4p0/1480                                                                                                  | gnl BL_ORD_ID 61260                                                                                                  | cb1333_c110/f1p0/5352    |      |      |      |      |      |      |      |      |
|                                                                                                                      |                                                                                                                      |                          | 153  | 1473 | 3    | 154  | 3730 | 504  | 1    | 152  |



|                         |                                                                                                                                            |                         |      |      |      |      |      |      |      |      |
|-------------------------|--------------------------------------------------------------------------------------------------------------------------------------------|-------------------------|------|------|------|------|------|------|------|------|
| acy=0.995               |                                                                                                                                            |                         |      |      |      |      |      |      |      |      |
| cb396_c48/f1p0/2172     | gnl BL_ORD_ID 39231<br>isoform=cb396_c67;full_length_coverage=28;non_full_length_coverage=0;isoform_length=2542;expected_accuracy=1.000    | cb396_c67/f28p0/2542    | 238  | 2104 | 3    | 238  | 554  | 2420 | 70   | 305  |
| cb8564_c4546/f2p0/2151  | gnl BL_ORD_ID 55032                                                                                                                        | cb8564_c4537/f1p0/2998  | 1    | 1329 | 1327 | 2152 | 1    | 1332 | 2198 | 3019 |
| cb8564_c69012/f2p0/2088 | gnl BL_ORD_ID 16545<br>isoform=cb8564_c69012;full_length_coverage=2;non_full_length_coverage=0;isoform_length=2088;expected_accuracy=0.995 | cb8564_c71990/f1p0/2407 | 569  | 2088 | 74   | 569  | 889  | 2406 | 1    | 496  |
| cb6063_c4/f2p0/2706     | gnl BL_ORD_ID 45238<br>isoform=cb6063_c4;full_length_coverage=2;non_full_length_coverage=0;isoform_length=2706;expected_accuracy=0.999     | cb6063_c0/f15p2/2941    | 241  | 2691 | 1    | 239  | 485  | 2941 | 1    | 238  |
| cb8564_c20798/f1p1/2960 | gnl BL_ORD_ID 14860<br>isoform=cb8564_c24783;full_length_coverage=1;non_full_length_coverage=1;isoform_length=3102;expected_accuracy=0.992 | cb8564_c24783/f1p1/3102 | 1314 | 2925 | 1    | 1319 | 1509 | 3102 | 16   | 1365 |
| cb8564_c49562/f1p0/2838 | gnl BL_ORD_ID 55182<br>isoform=cb8564_c49562;full_length_coverage=1;non_full_length_coverage=0;isoform_length=2838;expected_accuracy=0.995 | cb8564_c34825/f1p2/3200 | 15   | 2331 | 2327 | 2838 | 6    | 2350 | 2682 | 3194 |
| cb8564_c88311/f1p1/2475 | gnl BL_ORD_ID 57409<br>isoform=cb8564_c88311;full_length_coverage=1;non_full_length_coverage=1;isoform_length=2475;expected_               | cb8564_c92262/f1p0/3503 | 1    | 1814 | 1812 | 2473 | 128  | 1949 | 2640 | 3302 |



| accuracy=0.993          |                     |                         |                                                                                                                     |      |      |      |      |      |      |      |      |
|-------------------------|---------------------|-------------------------|---------------------------------------------------------------------------------------------------------------------|------|------|------|------|------|------|------|------|
| cb8564_c35645/f1p0/2804 | gnl BL_ORD_ID 13439 | cb8564_c22195/f4p0/2939 | isoform=cb8564_c22195;full_length_coverage=4;non_full_length_coverage=0;isoform_length=2939;expected_accuracy=0.996 | 149  | 2726 | 1    | 151  | 330  | 2907 | 1    | 151  |
| cb4142_c2/f1p0/1937     | gnl BL_ORD_ID 40544 | cb4142_c3/f1p0/2089     | isoform=cb4142_c3;full_length_coverage=1;non_full_length_coverage=0;isoform_length=1937;expected_accuracy=1.000     | 1    | 1594 | 1592 | 1927 | 1    | 1594 | 1706 | 2041 |
| cb1972_c0/f2p0/3980     | gnl BL_ORD_ID 35212 | cb1972_c8/f1p1/3986     | isoform=cb1972_c8;full_length_coverage=1;non_full_length_coverage=0;isoform_length=3980;expected_accuracy=1.000     | 1346 | 3876 | 11   | 1347 | 1456 | 3986 | 1    | 1334 |
| cb2707_c17/f1p1/3162    | gnl BL_ORD_ID 38446 | cb2707_c18/f1p1/3468    | isoform=cb2707_c18;full_length_coverage=1;non_full_length_coverage=1;isoform_length=3162;expected_accuracy=0.995    | 11   | 2572 | 2571 | 3030 | 312  | 2877 | 3009 | 3468 |
| cb8564_c72680/f1p0/2685 | gnl BL_ORD_ID 56759 | cb8564_c70577/f1p0/3111 |                                                                                                                     | 15   | 1735 | 1730 | 2636 | 1    | 1722 | 1901 | 2807 |
| cb8564_c12637/f1p2/3697 | gnl BL_ORD_ID 9961  | cb8564_c12013/f1p0/4420 | isoform=cb8564_c12013;full_length_coverage=1;non_full_length_coverage=0;isoform_length=4420;expected_accuracy=0.993 | 1    | 2998 | 2994 | 3575 | 86   | 3077 | 3654 | 4233 |
| cb7497_c22/f1p0/2606    | gnl BL_ORD_ID 6379  | cb7497_c10/f1p1/3177    | isoform=cb7497_c10;full_length_coverage=1;non_full_length_coverage=1;isoform_length=3177;expected_accuracy=0.993    | 998  | 2581 | 1    | 1001 | 1572 | 3156 | 1    | 1004 |

|                                                                                                                                                |                                                                                                                                                                      |     |      |      |      |     |      |      |      |  |
|------------------------------------------------------------------------------------------------------------------------------------------------|----------------------------------------------------------------------------------------------------------------------------------------------------------------------|-----|------|------|------|-----|------|------|------|--|
|                                                                                                                                                | acy=0.995                                                                                                                                                            |     |      |      |      |     |      |      |      |  |
| cb5068_c5/f1p1/2699<br>isoform=cb5068_c5;full_length_coverage=1;non_full_length_coverage=1;isoform_length=2699;expected_accuracy=0.995         | gnl BL_ORD_ID 73235 cb5068_c2/f1p0/3358                                                                                                                              | 2   | 2431 | 2426 | 2699 | 10  | 2440 | 2586 | 2859 |  |
| cb3082_c6/f1p1/2400<br>isoform=cb3082_c6;full_length_coverage=1;non_full_length_coverage=1;isoform_length=2400;expected_accuracy=0.995         | gnl BL_ORD_ID 69100 cb3082_c8/f1p0/2797                                                                                                                              | 110 | 2367 | 1    | 110  | 437 | 2692 | 3    | 108  |  |
| cb8564_c41756/f1p0/2738<br>isoform=cb8564_c41756;full_length_coverage=1;non_full_length_coverage=0;isoform_length=2738;expected_accuracy=0.996 | gnl BL_ORD_ID 14263 cb8564_c42654/f1p1/2906<br>isoform=cb8564_c42654;full_length_coverage=1;non_full_length_coverage=1;isoform_length=2906;expected_accuracy=0.990   | 1   | 2173 | 2170 | 2714 | 1   | 2155 | 2278 | 2824 |  |
| cb595_c0/f3p1/4752<br>isoform=cb595_c0;full_length_coverage=3;non_full_length_coverage=1;isoform_length=4752;expected_accuracy=0.999           | gnl BL_ORD_ID 72286 cb595_c23/f1p1/5099                                                                                                                              | 3   | 4402 | 4399 | 4665 | 1   | 4412 | 4576 | 4842 |  |
| cb12446_c3/f1p0/1412<br>isoform=cb12446_c3;full_length_coverage=1;non_full_length_coverage=0;isoform_length=1412;expected_accuracy=1.000       | gnl BL_ORD_ID 11282 cb8564_c150160/f1p3/2042<br>isoform=cb8564_c150160;full_length_coverage=1;non_full_length_coverage=3;isoform_length=2042;expected_accuracy=0.991 | 109 | 1412 | 1    | 111  | 712 | 2013 | 117  | 227  |  |
| cb3557_c22/f1p0/2990<br>isoform=cb3557_c9;full_length_coverage=1;non_full_length_coverage=0;isoform_length=3261;expected_accuracy=0.995        | gnl BL_ORD_ID 39538 cb3557_c9/f1p0/3261<br>isoform=cb3557_c9;full_length_coverage=1;non_full_length_coverage=0;isoform_length=3261;expected_accuracy=0.995           | 16  | 2070 | 2068 | 2722 | 1   | 2056 | 2608 | 3261 |  |
| cb8564_c72849/f1p0/2326<br>isoform=cb8564_c72849;full_length_coverage=1;non_full_length_coverage=0;isoform_length=2326;expected_accuracy=0.995 | gnl BL_ORD_ID 12630 cb8564_c123147/f1p0/2657                                                                                                                         | 1   | 1520 | 1520 | 2332 | 37  | 155  | 1757 | 257  |  |

|                                                                                                                      |                                                                                                                      |     |      |      |      |      |      |      |  |      |
|----------------------------------------------------------------------------------------------------------------------|----------------------------------------------------------------------------------------------------------------------|-----|------|------|------|------|------|------|--|------|
|                                                                                                                      | isoform=cb8564_c123147;full_length_coverage=1;non_full_length_coverage=0;isoform_length=2657;expected_accuracy=0.997 |     |      |      |      |      |      | 4    |  | 6    |
| cb3771_c11/f1p0/3160                                                                                                 | gnl BL_ORD_ID 40598      cb3771_c5/f1p0/3508                                                                         |     |      |      |      |      |      |      |  |      |
| isoform=cb3771_c11;full_length_coverage=1;non_full_length_coverage=0;isoform_length=3160;expected_accuracy=0.992     | isoform=cb3771_c5;full_length_coverage=1;non_full_length_coverage=0;isoform_length=3508;expected_accuracy=0.993      | 166 | 3084 | 1    | 167  | 590  | 3508 | 43   |  | 213  |
| cb8564_c39739/f1p1/2219                                                                                              | gnl BL_ORD_ID 16312      cb8564_c53551/f3p3/2373                                                                     |     |      |      |      |      |      |      |  |      |
| isoform=cb8564_c39739;full_length_coverage=1;non_full_length_coverage=1;isoform_length=2219;expected_accuracy=0.993  | isoform=cb8564_c53551;full_length_coverage=3;non_full_length_coverage=3;isoform_length=2373;expected_accuracy=1.000  | 10  | 1840 | 1840 | 2195 | 7    | 1850 | 1969 |  | 2325 |
| cb8564_c35607/f1p0/2587                                                                                              | gnl BL_ORD_ID 14819      cb8564_c40333/f1p2/4446                                                                     |     |      |      |      |      |      |      |  |      |
| isoform=cb8564_c35607;full_length_coverage=1;non_full_length_coverage=0;isoform_length=2587;expected_accuracy=0.993  | isoform=cb8564_c40333;full_length_coverage=1;non_full_length_coverage=2;isoform_length=4446;expected_accuracy=0.998  | 1   | 1685 | 1685 | 2581 | 1619 | 3300 | 3549 |  | 4446 |
| cb8564_c118488/f1p0/2066                                                                                             |                                                                                                                      |     |      |      |      |      |      |      |  |      |
| isoform=cb8564_c118488;full_length_coverage=1;non_full_length_coverage=0;isoform_length=2066;expected_accuracy=0.991 | gnl BL_ORD_ID 53375      cb8564_c123599/f1p0/2339                                                                    | 198 | 2055 | 11   | 200  | 435  | 2300 | 1    |  | 181  |
| cb4564_c26/f74p3/1694                                                                                                |                                                                                                                      |     |      |      |      |      |      |      |  |      |
| isoform=cb4564_c26;full_length_coverage=74;non_full_length_coverage=3;isoform_length=1694;expected_accuracy=0.999    | gnl BL_ORD_ID 72689      cb4564_c15/f1p0/1760                                                                        | 447 | 1635 | 6    | 448  | 588  | 1771 | 1    |  | 446  |
| cb5725_c17/f1p0/2282                                                                                                 |                                                                                                                      |     |      |      |      |      |      |      |  |      |
| isoform=cb5725_c17;full_length_coverage=1;non_full_length_coverage=0;isoform_length=2282;expected_accuracy=0.999     | gnl BL_ORD_ID 74341      cb5725_c19/f1p0/3053                                                                        | 1   | 1367 | 1364 | 2202 | 55   | 1418 | 2201 |  | 3040 |

|                                                                                                                     |                                                                                                                      |                          |     |      |      |      |     |      |      |      |
|---------------------------------------------------------------------------------------------------------------------|----------------------------------------------------------------------------------------------------------------------|--------------------------|-----|------|------|------|-----|------|------|------|
| racy=0.991                                                                                                          |                                                                                                                      |                          |     |      |      |      |     |      |      |      |
| cb8564_c50697/f1p3/2172                                                                                             | gnl BL_ORD_ID 11343                                                                                                  | cb8564_c148508/f1p3/2825 |     |      |      |      |     |      |      |      |
| isoform=cb8564_c50697;full_length_coverage=1;non_full_length_coverage=3;isoform_length=2172;expected_accuracy=0.993 | isoform=cb8564_c148508;full_length_coverage=1;non_full_length_coverage=3;isoform_length=2825;expected_accuracy=0.994 |                          | 106 | 2171 | 1    | 108  | 771 | 2825 | 47   | 153  |
| cb762_c11/f1p0/4026                                                                                                 | gnl BL_ORD_ID 8132                                                                                                   | cb762_c4/f1p0/4517       |     |      |      |      |     |      |      |      |
|                                                                                                                     | isoform=cb762_c4;full_length_coverage=1;non_full_length_coverage=0;isoform_length=4517;expected_accuracy=0.996       |                          | 1   | 2803 | 2801 | 3954 | 88  | 2890 | 3356 | 4508 |
| cb8564_c81975/f1p2/2386                                                                                             | gnl BL_ORD_ID 17162                                                                                                  | cb8564_c87465/f2p9/3179  |     |      |      |      |     |      |      |      |
| isoform=cb8564_c81975;full_length_coverage=1;non_full_length_coverage=2;isoform_length=2386;expected_accuracy=0.996 | isoform=cb8564_c87465;full_length_coverage=2;non_full_length_coverage=9;isoform_length=3179;expected_accuracy=1.000  |                          | 1   | 1315 | 1310 | 2386 | 625 | 1939 | 2083 | 3160 |
| cb7872_c9/f1p0/2221                                                                                                 | gnl BL_ORD_ID 50770                                                                                                  | cb7872_c10/f1p0/2367     |     |      |      |      |     |      |      |      |
|                                                                                                                     |                                                                                                                      |                          | 199 | 2041 | 11   | 197  | 353 | 2196 | 25   | 211  |
| cb7296_c10/f1p1/1975                                                                                                | gnl BL_ORD_ID 6916                                                                                                   | cb7296_c3/f1p1/2653      |     |      |      |      |     |      |      |      |
| isoform=cb7296_c10;full_length_coverage=1;non_full_length_coverage=1;isoform_length=1975;expected_accuracy=0.999    | isoform=cb7296_c3;full_length_coverage=1;non_full_length_coverage=1;isoform_length=2653;expected_accuracy=0.998      |                          | 1   | 1658 | 1657 | 1963 | 62  | 1720 | 2347 | 2653 |
| cb8564_c38464/f1p0/2918                                                                                             | gnl BL_ORD_ID 14058                                                                                                  | cb8564_c23936/f1p0/3016  |     |      |      |      |     |      |      |      |
|                                                                                                                     | isoform=cb8564_c23936;full_length_coverage=1;non_full_length_coverage=0;isoform_length=3016;expected_accuracy=0.995  |                          | 1   | 1713 | 1711 | 2584 | 4   | 1716 | 2143 | 3016 |
| cb8564_c36635/f1p0/4030                                                                                             | gnl BL_ORD_ID 55955                                                                                                  | cb8564_c50128/f1p0/4343  |     |      |      |      |     |      |      |      |
| isoform=cb8564_c36635;full_length_coverage=1;non_full_length_coverage=0;isoform_length=4030;expected_               |                                                                                                                      |                          | 184 | 3927 | 1    | 189  | 334 | 4077 | 15   | 204  |

|                                                                                                                                                          |                                             |      |      |      |      |      |          |      |          |
|----------------------------------------------------------------------------------------------------------------------------------------------------------|---------------------------------------------|------|------|------|------|------|----------|------|----------|
| accuracy=0.998<br>cb6519_c1/flp0/2399<br>isoform=cb6519_c1;full_length_coverage=1;non_full_length_coverage=0;isoform_length=2399;expected_accuracy=0.996 | gnl BL_ORD_ID 49795 cb6519_c0/flp0/2728     | 305  | 2385 | 5    | 307  | 423  | 253<br>2 | 6    | 309      |
| cb1658_c23/flp0/2662<br>isoform=cb1658_c23;full_length_coverage=1;non_full_length_coverage=0;isoform_length=2662;expected_accuracy=0.996                 | gnl BL_ORD_ID 63834 cb1658_c42/flp0/3937    | 1132 | 2620 | 1    | 1135 | 2400 | 389<br>3 | 18   | 1161     |
| cb499_c21/flp0/3092<br>isoform=cb499_c21;full_length_coverage=1;non_full_length_coverage=0;isoform_length=3092;expected_accuracy=0.996                   | gnl BL_ORD_ID 72233 cb499_c34/flp0/3463     | 1420 | 3084 | 1    | 1420 | 1763 | 342<br>7 | 29   | 144<br>8 |
| cb8564_c49562/flp0/2838<br>isoform=cb8564_c49562;full_length_coverage=1;non_full_length_coverage=0;isoform_length=2838;expected_accuracy=0.995           | gnl BL_ORD_ID 55910 cb8564_c48645/flp1/3287 | 16   | 2331 | 2327 | 2776 | 17   | 232<br>9 | 2661 | 3113     |
| cb12003_c138/flp0/1068<br>isoform=cb12003_c138;full_length_coverage=1;non_full_length_coverage=0;isoform_length=1068;expected_accuracy=1.000             | gnl BL_ORD_ID 60477 cb12003_c35/flp0/1418   | 420  | 1068 | 5    | 421  | 729  | 137<br>8 | 1    | 417      |
| cb500_c38/flp0/2822<br>isoform=cb500_c38;full_length_coverage=1;non_full_length_coverage=0;isoform_length=2822;expected_accuracy=0.999                   | gnl BL_ORD_ID 72248 cb500_c53/flp0/3672     | 13   | 2396 | 2391 | 2822 | 114  | 249<br>8 | 2960 | 339<br>1 |
| cb13515_c9/flp0/1348<br>isoform=cb13515_c9;full_length_coverage=1;non_full_length_coverage=0;isoform_length=1348;expected_accuracy=0.999                 | gnl BL_ORD_ID 62505 cb13515_c5/flp0/1553    | 1    | 1117 | 1114 | 1291 | 53   | 1168     | 1277 | 145<br>4 |
| cb8564_c117803/flp0/3246<br>isoform=cb8564_c117803;full_length_coverage=1;non_full_length_coverage=0;isoform_length=3246;expected_accuracy=0.999         | gnl BL_ORD_ID 9642 cb8564_c117476/flp1/3616 | 1    | 2822 | 2823 | 3236 | 99   | 293      | 3205 | 361      |

|                                                                                                                                              |                                                                                                                      |     |      |      |      |     |      |      |      |
|----------------------------------------------------------------------------------------------------------------------------------------------|----------------------------------------------------------------------------------------------------------------------|-----|------|------|------|-----|------|------|------|
| isoform=cb8564_c117803;full_length_coverage=1;non_full_length_coverage=0;isoform_length=3246;expected_accuracy=0.995<br>cb4674_c27/f1p1/2865 | isoform=cb8564_c117476;full_length_coverage=1;non_full_length_coverage=1;isoform_length=3616;expected_accuracy=0.997 |     |      |      |      |     |      | 7    | 6    |
| isoform=cb4674_c27;full_length_coverage=1;non_full_length_coverage=1;isoform_length=2865;expected_accuracy=0.993                             | gnl BL_ORD_ID 72841 cb4674_c25/f1p0/3544                                                                             | 1   | 2046 | 2046 | 2865 | 5   | 2057 | 2656 | 3478 |
| cb8564_c46939/f1p1/2926                                                                                                                      | gnl BL_ORD_ID 55472 cb8564_c42531/f1p0/3996                                                                          | 125 | 2134 | 2130 | 2870 | 816 | 2833 | 2938 | 3679 |
| cb4128_c10/f3p1/2897                                                                                                                         | gnl BL_ORD_ID 71809 cb4128_c15/f1p0/3851                                                                             | 1   | 2152 | 2151 | 2777 | 1   | 2154 | 3114 | 3740 |
| cb3451_c8/f1p0/1800                                                                                                                          | gnl BL_ORD_ID 39654 cb3451_c0/f1p0/2080                                                                              |     |      |      |      |     |      |      |      |
| isoform=cb3451_c8;full_length_coverage=1;non_full_length_coverage=0;isoform_length=1800;expected_accuracy=0.997                              | isoform=cb3451_c0;full_length_coverage=1;non_full_length_coverage=0;isoform_length=2080;expected_accuracy=0.992      | 103 | 1776 | 1    | 106  | 410 | 2080 | 143  | 248  |
| cb8564_c36689/f1p1/2368                                                                                                                      | gnl BL_ORD_ID 56727 cb8564_c66920/f3p3/2894                                                                          | 1   | 1709 | 1706 | 2365 | 1   | 1703 | 2202 | 2863 |
| isoform=cb8564_c36689;full_length_coverage=1;non_full_length_coverage=1;isoform_length=2368;expected_accuracy=0.991                          |                                                                                                                      |     |      |      |      |     |      |      |      |
| cb416_c58/f1p0/2505                                                                                                                          | gnl BL_ORD_ID 42631 cb416_c29/f1p0/2757                                                                              |     |      |      |      |     |      |      |      |
| isoform=cb416_c58;full_length_coverage=1;non_full_length_coverage=0;isoform_length=2505;expected_accuracy=0.992                              | isoform=cb416_c29;full_length_coverage=1;non_full_length_coverage=0;isoform_length=2757;expected_accuracy=0.993      | 286 | 2505 | 4    | 287  | 550 | 2747 | 121  | 400  |
| cb8564_c109958/f2p0/2267                                                                                                                     | gnl BL_ORD_ID 53549 cb8564_c128508/f1p0/4775                                                                         | 1   | 1291 | 1289 | 2266 | 1   | 129  | 3791 | 476  |

|                                                                                                                      |                                                                                                                      |                          |      |      |      |      |      |      |      |      |
|----------------------------------------------------------------------------------------------------------------------|----------------------------------------------------------------------------------------------------------------------|--------------------------|------|------|------|------|------|------|------|------|
| isoform=cb8564_c109958;full_length_coverage=2;non_full_length_coverage=0;isoform_length=2267;expected_accuracy=1.000 |                                                                                                                      |                          |      |      |      |      |      | 1    |      | 8    |
| cb1926_c7/f1p0/3660                                                                                                  | gnl BL_ORD_ID 34504                                                                                                  | cb1926_c1/f2p1/3871      |      |      |      |      |      |      |      |      |
| isoform=cb1926_c7;full_length_coverage=1;non_full_length_coverage=0;isoform_length=3660;expected_accuracy=0.994      | isoform=cb1926_c1;full_length_coverage=2;non_full_length_coverage=1;isoform_length=3871;expected_accuracy=1.000      |                          | 18   | 3453 | 3452 | 3660 | 51   | 3486 | 3626 | 3833 |
| cb8564_c75527/f1p1/1992                                                                                              | gnl BL_ORD_ID 13172                                                                                                  | cb8564_c159486/f2p1/2104 |      |      |      |      |      |      |      |      |
| isoform=cb8564_c75527;full_length_coverage=1;non_full_length_coverage=1;isoform_length=1992;expected_accuracy=0.993  | isoform=cb8564_c159486;full_length_coverage=2;non_full_length_coverage=1;isoform_length=2104;expected_accuracy=1.000 |                          | 1    | 1063 | 1059 | 1954 | 1    | 1063 | 1209 | 2104 |
| cb8564_c86643/f1p0/2138                                                                                              | gnl BL_ORD_ID 57913                                                                                                  | cb8564_c83955/f1p0/2930  |      |      |      |      |      |      |      |      |
|                                                                                                                      | gnl BL_ORD_ID 36231                                                                                                  | cb18812_c11/f1p2/5013    |      |      |      |      |      |      |      |      |
| cb8564_c79401/f1p0/4816                                                                                              | isoform=cb18812_c11;full_length_coverage=1;non_full_length_coverage=2;isoform_length=5013;expected_accuracy=0.997    |                          | 1072 | 4317 | 1    | 1068 | 1763 | 5009 | 809  | 1876 |
| cb17354_c1/f1p0/1440                                                                                                 | gnl BL_ORD_ID 65774                                                                                                  | cb17354_c3/f1p0/1686     |      |      |      |      |      |      |      |      |
| cb4074_c19/f3p1/2467                                                                                                 | gnl BL_ORD_ID 39766                                                                                                  | cb4074_c7/f1p1/2826      |      |      |      |      |      |      |      |      |
| isoform=cb4074_c19;full_length_coverage=3;non_full_length_coverage=1;isoform_length=2467;expected_accuracy=1.000     | isoform=cb4074_c7;full_length_coverage=1;non_full_length_coverage=1;isoform_length=2826;expected_accuracy=0.994      |                          | 1    | 1361 | 1357 | 2408 | 2    | 1335 | 1781 | 2826 |
| cb2430_c24/f16p1/2568                                                                                                | gnl BL_ORD_ID 36773                                                                                                  | cb2430_c19/f1p0/2700     |      |      |      |      |      |      |      |      |
| isoform=cb2430_c24;full_length_coverage=16;non_full_length_coverage=1;isoform_length=2568;expected_accuracy=0.994    | isoform=cb2430_c19;full_length_coverage=1;non_full_length_coverage=0;isoform_length=2700;expected_accuracy=0.994     |                          | 2    | 2130 | 2125 | 2564 | 8    | 2125 | 2263 | 2700 |

|                                                                                                                                                         |                                                       |     |      |      |      |     |      |      |      |
|---------------------------------------------------------------------------------------------------------------------------------------------------------|-------------------------------------------------------|-----|------|------|------|-----|------|------|------|
| uracy=1.000<br>cb1955_c12/f1p1/2862<br>isoform=cb1955_c12;full_length_coverage=1;non_full_length_coverage=1;isoform_length=2862;expected_accuracy=1.000 | acy=0.993<br>gnl BL_ORD_ID 66534 cb1955_c27/f1p0/3020 | 107 | 2021 | 2019 | 2861 | 1   | 1915 | 2196 | 3044 |
| cb15911_c1/f1p0/1420<br>isoform=cb15911_c0;full_length_coverage=1;non_full_length_coverage=0;isoform_length=1558;expected_accuracy=0.990                | gnl BL_ORD_ID 30166 cb15911_c0/f1p0/1558              | 292 | 1291 | 32   | 291  | 559 | 1558 | 1    | 259  |
| cb2533_c26/f1p1/3568<br>isoform=cb2533_c26;full_length_coverage=1;non_full_length_coverage=1;isoform_length=3568;expected_accuracy=0.997                | gnl BL_ORD_ID 38533 cb2533_c16/f1p0/4039              | 133 | 2983 | 2982 | 3565 | 1   | 2836 | 3451 | 4031 |
| cb7804_c1/f1p0/1940<br>isoform=cb7804_c0;full_length_coverage=1;non_full_length_coverage=0;isoform_length=2529;expected_accuracy=0.998                  | gnl BL_ORD_ID 8602 cb7804_c0/f1p0/2529                | 1   | 1128 | 1126 | 1952 | 84  | 1211 | 1704 | 2529 |
| cb12931_c15/f1p0/1493<br>isoform=cb12931_c15;full_length_coverage=1;non_full_length_coverage=0;isoform_length=1493;expected_accuracy=1.000              | gnl BL_ORD_ID 55391 cb8564_c40278/f3p2/3083           | 1   | 1106 | 1104 | 1493 | 1   | 1102 | 2482 | 2871 |
| cb4664_c15/f1p0/2526<br>isoform=cb4664_c0;full_length_coverage=6;non_full_length_coverage=1;isoform_length=2463;expected_accuracy=0.996                 | gnl BL_ORD_ID 42518 cb4664_c0/f6p1/2463               | 229 | 2260 | 7    | 232  | 437 | 2463 | 3    | 228  |
| cb8564_c953/f2p0/2607                                                                                                                                   | gnl BL_ORD_ID 14419 cb8564_c3905/f3p1/2854            | 154 | 2603 | 1    | 154  | 380 | 282  | 96   | 248  |



|                                                                                                                                                 |                                                                                                                                                                                         |     |      |      |      |     |      |      |      |
|-------------------------------------------------------------------------------------------------------------------------------------------------|-----------------------------------------------------------------------------------------------------------------------------------------------------------------------------------------|-----|------|------|------|-----|------|------|------|
| isoform=cb8564_c953;full_length_coverage=2;non_full_length_coverage=0;isoform_length=2607;expected_accuracy=0.997<br>cb4370_c6/f1p0/2015        | isoform=cb8564_c3905;full_length_coverage=3;non_full_length_coverage=1;isoform_length=2854;expected_accuracy=0.999<br>gnl BL_ORD_ID 44190                      cb4370_c7/f1p0/2660      |     |      |      |      |     |      |      | 9    |
| isoform=cb4370_c6;full_length_coverage=1;non_full_length_coverage=0;isoform_length=2015;expected_accuracy=0.993<br>cb48_c3/f1p2/4932            | isoform=cb4370_c7;full_length_coverage=1;non_full_length_coverage=0;isoform_length=2660;expected_accuracy=0.996<br>gnl BL_ORD_ID 42658                      cb48_c8/f1p2/5695           | 1   | 1310 | 1310 | 1981 | 135 | 144  | 1987 | 2660 |
| isoform=cb48_c3;full_length_coverage=1;non_full_length_coverage=2;isoform_length=4932;expected_accuracy=0.996<br>cb7432_c6/f2p0/2148            | isoform=cb48_c8;full_length_coverage=1;non_full_length_coverage=2;isoform_length=5695;expected_accuracy=0.998<br>gnl BL_ORD_ID 6353                      cb7432_c13/f1p0/2615           | 1   | 4362 | 4362 | 4932 | 1   | 4364 | 5032 | 5600 |
| isoform=cb7432_c6;full_length_coverage=2;non_full_length_coverage=0;isoform_length=2148;expected_accuracy=1.000<br>cb8564_c122994/f1p1/1940     | isoform=cb7432_c13;full_length_coverage=1;non_full_length_coverage=0;isoform_length=2615;expected_accuracy=0.995<br>gnl BL_ORD_ID 54581                      cb8564_c127099/f1p0/2249   | 154 | 2148 | 1    | 158  | 622 | 2615 | 41   | 196  |
| isoform=cb8564_c122994;full_length_coverage=1;non_full_length_coverage=1;isoform_length=1940;expected_accuracy=1.000<br>cb8564_c43779/f1p0/3021 | gnl BL_ORD_ID 16622                      cb8564_c50151/f1p0/3198                                                                                                                        | 13  | 1748 | 1748 | 1940 | 104 | 1839 | 1981 | 2173 |
| isoform=cb8564_c43779;full_length_coverage=1;non_full_length_coverage=0;isoform_length=3021;expected_accuracy=0.993<br>cb8564_c25160/f1p0/3126  | isoform=cb8564_c50151;full_length_coverage=1;non_full_length_coverage=0;isoform_length=3198;expected_accuracy=0.995<br>gnl BL_ORD_ID 54223                      cb8564_c20818/f1p0/3419 | 1   | 2344 | 2345 | 3019 | 6   | 2369 | 2525 | 3198 |
| isoform=cb8564_c25160;full_length_coverage=1;non_full_length_coverage=0;isoform_length=3126;expected_                                           |                                                                                                                                                                                         | 1   | 2710 | 2706 | 2995 | 2   | 2712 | 3070 | 3359 |

|                                                                                                                                                                  |                                                                                                                                                                      |      |      |      |      |      |      |      |      |
|------------------------------------------------------------------------------------------------------------------------------------------------------------------|----------------------------------------------------------------------------------------------------------------------------------------------------------------------|------|------|------|------|------|------|------|------|
| accuracy=0.996<br>cb8564_c24921/f3p0/3854<br>isoform=cb8564_c24921;full_length_coverage=3;non_full_length_coverage=0;isoform_length=3854;expected_accuracy=0.996 | gnl BL_ORD_ID 52730 cb8564_c12303/f1p0/3960                                                                                                                          | 1    | 2016 | 2016 | 3852 | 4    | 2020 | 2135 | 3972 |
| cb8564_c4544/f1p1/2154                                                                                                                                           | gnl BL_ORD_ID 14176 cb8564_c4538/f2p0/2766<br>isoform=cb8564_c4538;full_length_coverage=2;non_full_length_coverage=0;isoform_length=2766;expected_accuracy=0.994     | 1    | 1433 | 1431 | 2073 | 1    | 1430 | 2048 | 2690 |
| cb8564_c90610/f1p0/2901                                                                                                                                          | gnl BL_ORD_ID 12722 cb8564_c164043/f3p3/2848<br>isoform=cb8564_c164043;full_length_coverage=3;non_full_length_coverage=3;isoform_length=2848;expected_accuracy=1.000 | 1087 | 2722 | 1    | 1087 | 1169 | 2803 | 210  | 1296 |
| cb8564_c180116/f1p0/2944<br>isoform=cb8564_c180116;full_length_coverage=1;non_full_length_coverage=0;isoform_length=2944;expected_accuracy=0.996                 | gnl BL_ORD_ID 14539 cb8564_c46562/f2p3/3196<br>isoform=cb8564_c46562;full_length_coverage=2;non_full_length_coverage=3;isoform_length=3196;expected_accuracy=0.995   | 1    | 2522 | 2520 | 2944 | 4    | 2543 | 2772 | 3195 |
| cb4269_c10/f1p0/1931<br>isoform=cb4269_c10;full_length_coverage=1;non_full_length_coverage=0;isoform_length=1931;expected_accuracy=0.997                         | gnl BL_ORD_ID 72418 cb4269_c7/f1p0/2973                                                                                                                              | 129  | 1931 | 1    | 130  | 1121 | 2922 | 2    | 122  |
| cb500_c16/f1p0/3627                                                                                                                                              | gnl BL_ORD_ID 41882 cb500_c76/f1p0/3763<br>isoform=cb500_c76;full_length_coverage=1;non_full_length_coverage=0;isoform_length=3763;expected_accuracy=0.997           | 1    | 1882 | 1880 | 3554 | 1    | 1884 | 2090 | 3763 |
| cb8564_c33702/f1p6/2850                                                                                                                                          | gnl BL_ORD_ID 56633 cb8564_c49796/f2p5/3077                                                                                                                          | 580  | 2847 | 6    | 575  | 740  | 301  | 3    | 555  |



|                                                                                                                       |                                                                                                                     |                         |      |      |      |      |      |      |      |      |
|-----------------------------------------------------------------------------------------------------------------------|---------------------------------------------------------------------------------------------------------------------|-------------------------|------|------|------|------|------|------|------|------|
| racy=0.993                                                                                                            |                                                                                                                     |                         |      |      |      |      |      |      |      |      |
| cb8564_c148448/f2p13/3821                                                                                             | gnl BL_ORD_ID 16742                                                                                                 | cb8564_c628/f3p1/4943   |      |      |      |      |      |      |      |      |
| isoform=cb8564_c148448;full_length_coverage=2;non_full_length_coverage=13;isoform_length=3821;expected_accuracy=0.995 | isoform=cb8564_c628;full_length_coverage=3;non_full_length_coverage=1;isoform_length=4943;expected_accuracy=1.000   |                         | 17   | 1937 | 1935 | 3787 | 1    | 1916 | 3085 | 4937 |
| cb8564_c10484/f1p0/2516                                                                                               | gnl BL_ORD_ID 9857                                                                                                  | cb8564_c10041/f6p0/3368 |      |      |      |      |      |      |      |      |
|                                                                                                                       | isoform=cb8564_c10041;full_length_coverage=6;non_full_length_coverage=0;isoform_length=3368;expected_accuracy=0.998 |                         | 2    | 2227 | 2227 | 2464 | 3    | 2243 | 3131 | 3368 |
| cb6318_c23/f1p1/2399                                                                                                  | gnl BL_ORD_ID 4834                                                                                                  | cb6318_c36/f11p0/2697   |      |      |      |      |      |      |      |      |
| isoform=cb6318_c23;full_length_coverage=1;non_full_length_coverage=1;isoform_length=2399;expected_accuracy=0.991      | isoform=cb6318_c36;full_length_coverage=11;non_full_length_coverage=0;isoform_length=2697;expected_accuracy=1.000   |                         | 1    | 1848 | 1844 | 2399 | 55   | 1892 | 2037 | 2592 |
| cb416_c19/f1p0/2939                                                                                                   | gnl BL_ORD_ID 72150                                                                                                 | cb416_c40/f1p0/3116     |      |      |      |      |      |      |      |      |
|                                                                                                                       |                                                                                                                     |                         | 105  | 2873 | 10   | 109  | 224  | 2970 | 24   | 123  |
| cb8564_c178226/f1p0/2728                                                                                              | gnl BL_ORD_ID 55371                                                                                                 | cb8564_c39756/f1p1/3004 |      |      |      |      |      |      |      |      |
| isoform=cb8564_c178226;full_length_coverage=1;non_full_length_coverage=0;isoform_length=2728;expected_accuracy=0.998  |                                                                                                                     |                         | 1284 | 2728 | 1    | 1288 | 1394 | 2852 | 1    | 1290 |
| cb16508_c2/f1p0/1556                                                                                                  | gnl BL_ORD_ID 65309                                                                                                 | cb16508_c0/f1p0/1682    |      |      |      |      |      |      |      |      |
|                                                                                                                       |                                                                                                                     |                         | 248  | 1552 | 34   | 247  | 358  | 1662 | 4    | 209  |
| cb8564_c91425/f1p1/3198                                                                                               | gnl BL_ORD_ID 15431                                                                                                 | cb8564_c43034/f1p2/3197 |      |      |      |      |      |      |      |      |
|                                                                                                                       | isoform=cb8564_c43034;full_length_coverage=1;non_full_length_coverage=2;isoform_length=3197;expected_accuracy=0.996 |                         | 1    | 2525 | 2522 | 3025 | 4    | 2522 | 2663 | 3165 |
| cb5631_c16/f1p0/2621                                                                                                  | gnl BL_ORD_ID 74185                                                                                                 | cb5631_c19/f1p0/3377    |      |      |      |      |      |      |      |      |
|                                                                                                                       |                                                                                                                     |                         | 15   | 1949 | 1945 | 2621 | 1    | 193  | 2234 | 291  |

|                                                                                                                                              |                                                                                                                                                                                         |      |      |      |      |      |          |      |          |
|----------------------------------------------------------------------------------------------------------------------------------------------|-----------------------------------------------------------------------------------------------------------------------------------------------------------------------------------------|------|------|------|------|------|----------|------|----------|
| isoform=cb5631_c16;full_length_coverage=1;non_full_length_coverage=0;isoform_length=2621;expected_accuracy=0.991<br>cb322_c9/f2p0/3136       |                                                                                                                                                                                         |      |      |      |      |      |          | 3    | 5        |
| isoform=cb322_c9;full_length_coverage=2;non_full_length_coverage=0;isoform_length=3136;expected_accuracy=1.000<br>cb187_c5/f1p0/3727         | gnl BL_ORD_ID 69560 cb322_c25/f1p0/3845                                                                                                                                                 | 1    | 2718 | 2718 | 3135 | 18   | 273<br>1 | 3220 | 363<br>6 |
| isoform=cb187_c5;full_length_coverage=1;non_full_length_coverage=0;isoform_length=3727;expected_accuracy=0.996<br>cb5125_c36/f1p0/1789       | gnl BL_ORD_ID 68081 cb187_c18/f1p0/4376                                                                                                                                                 | 152  | 3727 | 1    | 151  | 737  | 431<br>2 | 20   | 174      |
| isoform=cb5125_c36;full_length_coverage=1;non_full_length_coverage=0;isoform_length=1789;expected_accuracy=0.998<br>cb8564_c118011/f1p0/1965 | gnl BL_ORD_ID 43457                      cb5125_c11/f2p1/2545<br>isoform=cb5125_c11;full_length_coverage=2;non_full_length_coverage=1;isoform_length=2545;expected_accuracy=1.000       | 1    | 1163 | 1158 | 1789 | 53   | 121<br>5 | 1865 | 249<br>7 |
| cb8564_c118011/f1p0/1965                                                                                                                     | gnl BL_ORD_ID 52770 cb8564_c13377/f1p0/4350                                                                                                                                             | 1    | 1321 | 1321 | 1964 | 1986 | 331<br>9 | 3499 | 413<br>9 |
| cb2208_c33/f1p0/3174                                                                                                                         | gnl BL_ORD_ID 38174                      cb2208_c2/f4p0/3275<br>isoform=cb2208_c2;full_length_coverage=4;non_full_length_coverage=0;isoform_length=3275;expected_accuracy=0.999         | 1    | 2195 | 2193 | 2861 | 60   | 225<br>1 | 2485 | 315<br>3 |
| cb8564_c180776/f1p0/2895                                                                                                                     | gnl BL_ORD_ID 18852                      cb8564_c84488/f1p0/3408<br>isoform=cb8564_c84488;full_length_coverage=1;non_full_length_coverage=0;isoform_length=3408;expected_accuracy=0.996 | 281  | 2895 | 1    | 280  | 791  | 340<br>7 | 1    | 281      |
| cb166_c11/f1p0/4188                                                                                                                          | gnl BL_ORD_ID 32008                      cb166_c21/f4p1/4388                                                                                                                            | 1392 | 4118 | 1    | 1394 | 1662 | 438      | 81   | 146      |

|                                                                                                                      |                                                                                                                      |     |      |      |      |      |      |      |      |
|----------------------------------------------------------------------------------------------------------------------|----------------------------------------------------------------------------------------------------------------------|-----|------|------|------|------|------|------|------|
|                                                                                                                      | isoform=cb166_c21;full_length_coverage=4;non_full_length_coverage=1;isoform_length=4388;expected_accuracy=1.000      |     |      |      |      |      |      | 8    | 9    |
| cb313_c3/f2p0/2434                                                                                                   | gnl BL_ORD_ID 36627      cb313_c24/f1p0/3081                                                                         |     |      |      |      |      |      |      |      |
| isoform=cb313_c3;full_length_coverage=2;non_full_length_coverage=0;isoform_length=2434;expected_accuracy=0.995       | isoform=cb313_c24;full_length_coverage=1;non_full_length_coverage=0;isoform_length=3081;expected_accuracy=0.995      | 1   | 2112 | 2112 | 2373 | 146  | 2255 | 2820 | 3081 |
| cb8564_c4645/f1p1/2620                                                                                               | gnl BL_ORD_ID 12102      cb8564_c136340/f3p2/2729                                                                    |     |      |      |      |      |      |      |      |
| isoform=cb8564_c4645;full_length_coverage=1;non_full_length_coverage=1;isoform_length=2620;expected_accuracy=0.994   | isoform=cb8564_c136340;full_length_coverage=3;non_full_length_coverage=2;isoform_length=2729;expected_accuracy=0.998 | 1   | 1828 | 1829 | 2528 | 66   | 1905 | 2029 | 2729 |
| cb227_c12/f1p1/2303                                                                                                  | gnl BL_ORD_ID 37093      cb227_c5/f1p0/3888                                                                          |     |      |      |      |      |      |      |      |
| isoform=cb227_c12;full_length_coverage=1;non_full_length_coverage=1;isoform_length=2303;expected_accuracy=0.990      | isoform=cb227_c5;full_length_coverage=1;non_full_length_coverage=0;isoform_length=3888;expected_accuracy=0.998       | 1   | 2073 | 2073 | 2303 | 428  | 2523 | 2712 | 2948 |
| cb3290_c199/f1p0/1897                                                                                                | gnl BL_ORD_ID 40424      cb3290_c67/f1p0/2784                                                                        |     |      |      |      |      |      |      |      |
| isoform=cb3290_c199;full_length_coverage=1;non_full_length_coverage=0;isoform_length=1897;expected_accuracy=0.993    | isoform=cb3290_c67;full_length_coverage=1;non_full_length_coverage=0;isoform_length=2784;expected_accuracy=0.999     | 255 | 1896 | 4    | 258  | 1145 | 2784 | 37   | 293  |
| cb8564_c23232/f1p3/2540                                                                                              | gnl BL_ORD_ID 55416      cb8564_c41107/f1p0/2832                                                                     |     |      |      |      |      |      |      |      |
| isoform=cb8564_c23232;full_length_coverage=1;non_full_length_coverage=0;isoform_length=2540;expected_accuracy=0.993  | isoform=cb8564_c41107;full_length_coverage=1;non_full_length_coverage=0;isoform_length=2832;expected_accuracy=0.999  | 16  | 2172 | 2167 | 2518 | 6    | 2163 | 2265 | 2615 |
| cb8564_c129801/f1p0/2269                                                                                             | gnl BL_ORD_ID 54524      cb8564_c125248/f1p0/3365                                                                    |     |      |      |      |      |      |      |      |
| isoform=cb8564_c129801;full_length_coverage=1;non_full_length_coverage=0;isoform_length=2269;expected_accuracy=0.993 | isoform=cb8564_c125248;full_length_coverage=1;non_full_length_coverage=0;isoform_length=3365;expected_accuracy=0.999 | 196 | 2197 | 1    | 197  | 1114 | 3106 | 1    | 186  |
| cb8564_c81944/f1p1/3166                                                                                              | gnl BL_ORD_ID 56083      cb8564_c54532/f1p0/3806                                                                     |     |      |      |      |      |      |      |      |
| isoform=cb8564_c81944;full_length_coverage=1;non_full_length_coverage=0;isoform_length=3166;expected_accuracy=0.993  | isoform=cb8564_c54532;full_length_coverage=1;non_full_length_coverage=0;isoform_length=3806;expected_accuracy=0.999  | 2   | 2661 | 2666 | 3166 | 2    | 265  | 2794 | 329  |

|                                                                                                                       |                                                                                                                    |                          |      |      |      |      |      |      |      |      |
|-----------------------------------------------------------------------------------------------------------------------|--------------------------------------------------------------------------------------------------------------------|--------------------------|------|------|------|------|------|------|------|------|
| isoform=cb8564_c81944;full_length_coverage=1;non_full_length_coverage=1;isoform_length=3166;expected_accuracy=0.995   |                                                                                                                    |                          |      |      |      |      |      | 3    |      | 8    |
| cb1658_c18/f1p0/2729                                                                                                  | gnl BL_ORD_ID 31084                                                                                                | cb1658_c11/f1p0/3913     |      |      |      |      |      |      |      |      |
| isoform=cb1658_c18;full_length_coverage=1;non_full_length_coverage=0;isoform_length=2729;expected_accuracy=0.999      | isoform=cb1658_c11;full_length_coverage=1;non_full_length_coverage=0;isoform_length=3913;expected_accuracy=0.994   |                          | 1147 | 2661 | 1    | 1150 | 2404 | 3913 | 29   | 1174 |
| cb12587_c9/f1p0/1679                                                                                                  | gnl BL_ORD_ID 53017                                                                                                | cb8564_c114342/f1p0/2738 | 160  | 1616 | 1    | 160  | 1321 | 2777 | 30   | 189  |
| cb2737_c35/f1p0/2780                                                                                                  | gnl BL_ORD_ID 68785                                                                                                | cb2737_c49/f1p0/3341     | 134  | 2780 | 1    | 134  | 430  | 3081 | 4    | 137  |
| isoform=cb2737_c35;full_length_coverage=1;non_full_length_coverage=0;isoform_length=2780;expected_accuracy=0.993      |                                                                                                                    |                          |      |      |      |      |      |      |      |      |
| cb3456_c3/f1p0/2774                                                                                                   | gnl BL_ORD_ID 41300                                                                                                | cb3456_c0/f4p1/3471      | 1221 | 2781 | 1    | 1223 | 1452 | 3011 | 53   | 1275 |
| isoform=cb3456_c0;full_length_coverage=4;non_full_length_coverage=1;isoform_length=3471;expected_accuracy=0.997       |                                                                                                                    |                          |      |      |      |      |      |      |      |      |
| cb7845_c1/f1p0/2303                                                                                                   | gnl BL_ORD_ID 8537                                                                                                 | cb7845_c4/f1p0/2414      | 182  | 2225 | 1    | 183  | 365  | 2414 | 1    | 178  |
| isoform=cb7845_c1;full_length_coverage=1;non_full_length_coverage=0;isoform_length=2303;expected_accuracy=0.991       | isoform=cb7845_c4;full_length_coverage=1;non_full_length_coverage=0;isoform_length=2414;expected_accuracy=0.997    |                          |      |      |      |      |      |      |      |      |
| cb8564_c146099/f10p9/3818                                                                                             | gnl BL_ORD_ID 19170                                                                                                | cb8564_c9757/f2p7/4230   | 1    | 3164 | 3165 | 3818 | 1    | 3162 | 3573 | 4226 |
| isoform=cb8564_c146099;full_length_coverage=10;non_full_length_coverage=9;isoform_length=3818;expected_accuracy=1.000 | isoform=cb8564_c9757;full_length_coverage=2;non_full_length_coverage=7;isoform_length=4230;expected_accuracy=0.999 |                          |      |      |      |      |      |      |      |      |
| cb4437_c10/f1p0/2497                                                                                                  | gnl BL_ORD_ID 72558                                                                                                | cb4437_c8/f1p0/2629      | 269  | 2494 | 9    | 270  | 402  | 262  | 2    | 263  |

|                                                                                                                                                 |                                                                                                                                                                    |      |      |      |      |      |      |      |      |  |
|-------------------------------------------------------------------------------------------------------------------------------------------------|--------------------------------------------------------------------------------------------------------------------------------------------------------------------|------|------|------|------|------|------|------|------|--|
| isoform=cb4437_c10;full_length_coverage=1;non_full_length_coverage=0;isoform_length=2497;expected_accuracy=0.996<br>cb1235_c4/f2p0/2309         |                                                                                                                                                                    |      |      |      |      |      |      | 8    |      |  |
| isoform=cb1235_c4;full_length_coverage=2;non_full_length_coverage=0;isoform_length=2309;expected_accuracy=0.997<br>cb1772_c6/f2p1/3674          | gnl BL_ORD_ID 59297 cb1235_c21/f1p0/3452                                                                                                                           | 1    | 1981 | 1980 | 2309 | 128  | 2108 | 3041 | 3370 |  |
| isoform=cb1772_c6;full_length_coverage=2;non_full_length_coverage=1;isoform_length=3674;expected_accuracy=1.000<br>cb8564_c111233/f1p0/3006     | gnl BL_ORD_ID 63938 cb1772_c19/f1p0/4042                                                                                                                           | 216  | 3674 | 1    | 218  | 440  | 3898 | 40   | 258  |  |
| isoform=cb8564_c111233;full_length_coverage=1;non_full_length_coverage=0;isoform_length=3006;expected_accuracy=0.998<br>cb8564_c53806/f1p3/3974 | gnl BL_ORD_ID 53359 cb8564_c123159/f1p0/3209                                                                                                                       | 1214 | 2955 | 1    | 1215 | 1441 | 3182 | 71   | 1265 |  |
| isoform=cb8564_c53806;full_length_coverage=1;non_full_length_coverage=3;isoform_length=3974;expected_accuracy=0.990<br>cb288_c0/f4p0/4339       | gnl BL_ORD_ID 13890 cb8564_c35935/f1p0/4149<br>isoform=cb8564_c35935;full_length_coverage=1;non_full_length_coverage=0;isoform_length=4149;expected_accuracy=0.993 | 169  | 3974 | 1    | 173  | 288  | 4055 | 15   | 183  |  |
| isoform=cb288_c0;full_length_coverage=4;non_full_length_coverage=0;isoform_length=4339;expected_accuracy=1.000<br>cb1658_c23/f1p0/2662          | gnl BL_ORD_ID 68166 cb288_c5/f1p0/4834                                                                                                                             | 176  | 4339 | 1    | 175  | 638  | 4818 | 4    | 191  |  |
| isoform=cb1658_c23;full_length_coverage=1;non_full_length_coverage=0;isoform_length=2662;expected_accuracy=0.996<br>cb1658_c15/f1p0/2863        | gnl BL_ORD_ID 31082 cb1658_c15/f1p0/2863<br>isoform=cb1658_c15;full_length_coverage=1;non_full_length_coverage=0;isoform_length=2863;expected_accuracy=0.996       | 1132 | 2590 | 1    | 1134 | 1401 | 2863 | 10   | 1156 |  |



|                         |                                                                                                                                                                         |     |      |      |      |      |      |      |      |  |
|-------------------------|-------------------------------------------------------------------------------------------------------------------------------------------------------------------------|-----|------|------|------|------|------|------|------|--|
| racy=0.996              | acy=0.994                                                                                                                                                               |     |      |      |      |      |      |      |      |  |
| cb8564_c71631/f1p0/1923 | gnl BL_ORD_ID 13387      cb8564_c22413/f1p0/3916<br>isoform=cb8564_c22413;full_length_coverage=1;non_full_length_coverage=0;isoform_length=3916;expected_accuracy=0.991 | 198 | 1902 | 8    | 200  | 2213 | 3916 | 1    | 197  |  |
| cb7771_c5/f1p0/2063     | gnl BL_ORD_ID 7436      cb7771_c3/f1p0/2176<br>isoform=cb7771_c3;full_length_coverage=1;non_full_length_coverage=0;isoform_length=2176;expected_accuracy=0.994          | 1   | 1339 | 1337 | 1982 | 1    | 1329 | 1432 | 2076 |  |
| cb4487_c20/f1p0/1667    | gnl BL_ORD_ID 43657      cb4487_c12/f1p0/3251<br>isoform=cb4487_c12;full_length_coverage=1;non_full_length_coverage=0;isoform_length=3251;expected_accuracy=0.997       | 267 | 1557 | 3    | 270  | 1931 | 3221 | 73   | 340  |  |
| cb3493_c11/f1p0/3332    | gnl BL_ORD_ID 70409      cb3493_c9/f1p0/3311                                                                                                                            | 1   | 2347 | 2342 | 3014 | 123  | 2469 | 2578 | 3249 |  |
| cb2218_c8/f1p1/2956     | isoform=cb2218_c8;full_length_coverage=1;non_full_length_coverage=1;isoform_length=2956;expected_accuracy=0.996                                                         |     |      |      |      |      |      |      |      |  |
|                         | gnl BL_ORD_ID 68350      cb2218_c14/f1p0/3547                                                                                                                           | 109 | 2907 | 1    | 112  | 357  | 3151 | 74   | 185  |  |
| cb2324_c36/f1p1/3463    | gnl BL_ORD_ID 37505      cb2324_c35/f1p1/3632<br>isoform=cb2324_c35;full_length_coverage=1;non_full_length_coverage=1;isoform_length=3632;expected_accuracy=0.996       | 100 | 3477 | 1    | 100  | 234  | 3611 | 21   | 120  |  |
| cb8564_c84468/f1p0/3473 | gnl BL_ORD_ID 15223      cb8564_c35037/f1p0/3377<br>isoform=cb8564_c35037;full_length_coverage=1;non_full_length_coverage=0;isoform_length=3377;expected_ac             | 129 | 2753 | 2751 | 3246 | 138  | 2761 | 2866 | 3361 |  |

|                                                                                                                                                  |                                                                                                                                                                    |      |      |      |      |      |          |      |          |  |
|--------------------------------------------------------------------------------------------------------------------------------------------------|--------------------------------------------------------------------------------------------------------------------------------------------------------------------|------|------|------|------|------|----------|------|----------|--|
|                                                                                                                                                  | curacy=0.996                                                                                                                                                       |      |      |      |      |      |          |      |          |  |
| cb3534_c9/f1p0/2857                                                                                                                              | gnl BL_ORD_ID 71286 cb3534_c10/f1p0/3148                                                                                                                           | 1310 | 2716 | 1    | 1313 | 1678 | 308<br>4 | 1    | 131<br>2 |  |
| cb8564_c146072/f3p3/2176<br>isoform=cb8564_c146072;full_length_coverage=3;non_full_length_coverage=3;isoform_length=2176;expected_accuracy=1.000 | gnl BL_ORD_ID 55345 cb8564_c39002/f1p2/2677                                                                                                                        | 1    | 1351 | 1349 | 2165 | 13   | 136<br>4 | 1721 | 253<br>9 |  |
| cb13049_c13/f1p1/1357<br>isoform=cb13049_c13;full_length_coverage=1;non_full_length_coverage=1;isoform_length=1357;expected_accuracy=0.993       | gnl BL_ORD_ID 18258 cb8564_c84027/f1p0/2419<br>isoform=cb8564_c84027;full_length_coverage=1;non_full_length_coverage=0;isoform_length=2419;expected_accuracy=0.997 | 314  | 1332 | 5    | 314  | 1414 | 241<br>9 | 4    | 305      |  |
| cb8564_c188097/f1p0/2552<br>isoform=cb8564_c188097;full_length_coverage=1;non_full_length_coverage=0;isoform_length=2552;expected_accuracy=0.996 | gnl BL_ORD_ID 54044 cb8564_c17331/f1p0/3185                                                                                                                        | 1    | 1945 | 1940 | 2505 | 35   | 198<br>0 | 2083 | 264<br>8 |  |
| cb2737_c55/f1p1/2936<br>isoform=cb2737_c55;full_length_coverage=1;non_full_length_coverage=1;isoform_length=2936;expected_accuracy=1.000         | gnl BL_ORD_ID 38133 cb2737_c21/f1p2/3479<br>isoform=cb2737_c21;full_length_coverage=1;non_full_length_coverage=2;isoform_length=3479;expected_accuracy=1.000       | 1    | 1595 | 1593 | 2936 | 413  | 200<br>3 | 2135 | 347<br>9 |  |
| cb4536_c2/f1p0/1954<br>isoform=cb4536_c2;full_length_coverage=1;non_full_length_coverage=0;isoform_length=1954;expected_accuracy=0.990           | gnl BL_ORD_ID 72653 cb4536_c4/f1p0/2190                                                                                                                            | 11   | 1377 | 1376 | 1943 | 1    | 136<br>9 | 1641 | 219<br>8 |  |
| cb3763_c32/f1p1/2854<br>isoform=cb3763_c32;full_length_coverage=1;non_full_length_coverage=1;isoform_length=2854;expected_accuracy=1.000         | gnl BL_ORD_ID 39926 cb3763_c51/f1p1/2991<br>isoform=cb3763_c51;full_length_coverage=1;non_full_length_coverage=1;isoform_length=2991;expected_accuracy=1.000       | 334  | 2825 | 6    | 335  | 497  | 299<br>1 | 1    | 335      |  |

|                         |                                                                                                                                                                           |      |      |      |      |      |      |      |      |  |
|-------------------------|---------------------------------------------------------------------------------------------------------------------------------------------------------------------------|------|------|------|------|------|------|------|------|--|
| racy=0.996              | acy=0.999                                                                                                                                                                 |      |      |      |      |      |      |      |      |  |
| cb3975_c6/f1p0/1965     | gnl BL_ORD_ID 41591      cb3975_c7/f1p1/2550<br>isoform=cb3975_c7;full_length_coverage=1;non_full_length_coverage=1;isoform_length=2550;expected_accuracy=0.990           | 1    | 1559 | 1558 | 1964 | 3    | 1564 | 2014 | 2414 |  |
| cb1166_c1/f2p0/2173     | gnl BL_ORD_ID 23338      cb1166_c2/f4p1/2715<br>isoform=cb1166_c1;full_length_coverage=2;non_full_length_coverage=0;isoform_length=2173;expected_accuracy=0.995           | 435  | 2168 | 9    | 440  | 984  | 2715 | 40   | 461  |  |
| cb8564_c40823/f1p2/3537 | gnl BL_ORD_ID 14669      cb8564_c44765/f1p1/4352<br>isoform=cb8564_c44765;full_length_coverage=1;non_full_length_coverage=1;isoform_length=4352;expected_accuracy=0.995   | 1412 | 3391 | 1    | 1414 | 2375 | 4352 | 111  | 1524 |  |
| cb8881_c18/f1p0/1628    | gnl BL_ORD_ID 20989      cb8881_c4/f1p0/2063<br>isoform=cb8881_c18;full_length_coverage=1;non_full_length_coverage=0;isoform_length=1628;expected_accuracy=0.997          | 1    | 1226 | 1225 | 1628 | 3    | 1231 | 1636 | 2036 |  |
| cb8564_c47011/f1p0/3100 | gnl BL_ORD_ID 12440      cb8564_c130435/f1p3/3226<br>isoform=cb8564_c130435;full_length_coverage=1;non_full_length_coverage=3;isoform_length=3226;expected_accuracy=0.994 | 12   | 2306 | 2301 | 2934 | 14   | 2320 | 2561 | 3204 |  |
| cb8564_c89271/f1p0/2023 | gnl BL_ORD_ID 18863      cb8564_c82439/f1p4/3856<br>isoform=cb8564_c82439;full_length_coverage=1;non_full_length_coverage=4;isoform_length=3856;expected_accuracy=0.997   | 309  | 1808 | 55   | 311  | 2343 | 3837 | 5    | 276  |  |
| cb8564_c50309/f1p5/3075 | gnl BL_ORD_ID 55920      cb8564_c48949/f1p0/4357                                                                                                                          | 1    | 2289 | 2290 | 2954 | 2    | 229  | 2847 | 351  |  |

|                                                                                                                                                |                                                                                                                                                                         |      |      |      |      |      |      |      |      |
|------------------------------------------------------------------------------------------------------------------------------------------------|-------------------------------------------------------------------------------------------------------------------------------------------------------------------------|------|------|------|------|------|------|------|------|
|                                                                                                                                                |                                                                                                                                                                         |      |      |      |      |      |      | 3    | 0    |
| cb8564_c71742/f1p0/2675                                                                                                                        | gnl BL_ORD_ID 16169      cb8564_c66877/f3p0/2938<br>isoform=cb8564_c66877;full_length_coverage=3;non_full_length_coverage=0;isoform_length=2938;expected_accuracy=0.996 | 1    | 1309 | 1310 | 2484 | 77   | 137  | 1764 | 2938 |
| cb8564_c1521/f1p0/2226                                                                                                                         | gnl BL_ORD_ID 52647      cb8564_c1520/f1p0/2355                                                                                                                         | 1105 | 2186 | 105  | 1108 | 1221 | 2302 | 1    | 1004 |
| cb8824_c3/f1p0/1749<br>isoform=cb8824_c3;full_length_coverage=1;non_full_length_coverage=0;isoform_length=1749;expected_accuracy=0.994         | gnl BL_ORD_ID 18297      cb8824_c1/f1p0/2259<br>isoform=cb8824_c1;full_length_coverage=1;non_full_length_coverage=0;isoform_length=2259;expected_accuracy=0.994         | 1    | 1315 | 1310 | 1749 | 1    | 1312 | 1687 | 2125 |
| cb500_c17/f1p0/2323<br>isoform=cb500_c17;full_length_coverage=1;non_full_length_coverage=0;isoform_length=2323;expected_accuracy=0.997         | gnl BL_ORD_ID 72246      cb500_c47/f1p0/3506                                                                                                                            | 1    | 1293 | 1288 | 2322 | 917  | 2209 | 2341 | 3375 |
| cb295_c26/f1p1/1869                                                                                                                            | gnl BL_ORD_ID 69537      cb295_c9/f1p0/4883                                                                                                                             | 1    | 1359 | 1358 | 1857 | 2    | 1352 | 1483 | 1986 |
| cb8564_c2326/f1p0/2006<br>isoform=cb8564_c2326;full_length_coverage=1;non_full_length_coverage=0;isoform_length=2006;expected_accuracy=0.990   | gnl BL_ORD_ID 53844      cb8564_c2432/f1p2/2768                                                                                                                         | 230  | 2006 | 4    | 234  | 784  | 2557 | 73   | 306  |
| cb8564_c75969/f1p1/2798<br>isoform=cb8564_c75969;full_length_coverage=1;non_full_length_coverage=1;isoform_length=2798;expected_accuracy=0.997 | gnl BL_ORD_ID 18906      cb8564_c90449/f1p3/3223<br>isoform=cb8564_c90449;full_length_coverage=1;non_full_length_coverage=3;isoform_length=3223;expected_accuracy=0.996 | 250  | 2798 | 1    | 251  | 640  | 3167 | 47   | 296  |
| cb8564_c87358/f1p0/2586                                                                                                                        | gnl BL_ORD_ID 57228      cb8564_c87142/f1p0/3290                                                                                                                        | 2    | 2283 | 2281 | 2477 | 69   | 235  | 2596 | 279  |

|                                                                                                                                             |                                                                                                                                                                    |     |      |      |      |      |      |      |      |
|---------------------------------------------------------------------------------------------------------------------------------------------|--------------------------------------------------------------------------------------------------------------------------------------------------------------------|-----|------|------|------|------|------|------|------|
| isoform=cb8564_c87358;full_length_coverage=1;non_full_length_coverage=0;isoform_length=2586;expected_accuracy=0.994<br>cb3618_c23/f1p0/2587 |                                                                                                                                                                    |     |      |      |      |      |      | 0    | 3    |
| isoform=cb3618_c23;full_length_coverage=1;non_full_length_coverage=0;isoform_length=2587;expected_accuracy=0.999<br>cb7432_c15/f1p0/2249    | gnl BL_ORD_ID 71383 cb3618_c11/f1p0/2951                                                                                                                           | 1   | 2348 | 2346 | 2585 | 76   | 2426 | 2555 | 2794 |
| isoform=cb7432_c15;full_length_coverage=1;non_full_length_coverage=0;isoform_length=2249;expected_accuracy=0.995                            | gnl BL_ORD_ID 51232 cb7432_c24/f1p0/2569                                                                                                                           | 156 | 2249 | 12   | 156  | 331  | 2425 | 13   | 159  |
| cb12714_c29/f1p2/1583                                                                                                                       | gnl BL_ORD_ID 12810 cb8564_c18099/f1p1/2597<br>isoform=cb8564_c18099;full_length_coverage=1;non_full_length_coverage=1;isoform_length=2597;expected_accuracy=0.992 | 1   | 1296 | 1293 | 1590 | 1    | 1296 | 2299 | 2597 |
| cb2815_c2/f1p0/1100                                                                                                                         | gnl BL_ORD_ID 37531 cb2815_c0/f2p0/3776<br>isoform=cb2815_c0;full_length_coverage=2;non_full_length_coverage=0;isoform_length=3776;expected_accuracy=1.000         | 165 | 1100 | 41   | 166  | 2800 | 3735 | 14   | 142  |
| cb5999_c2/f1p0/2957                                                                                                                         | gnl BL_ORD_ID 45208 cb5999_c3/f1p0/2890<br>isoform=cb5999_c3;full_length_coverage=1;non_full_length_coverage=0;isoform_length=2890;expected_accuracy=0.995         | 635 | 2645 | 87   | 638  | 889  | 2890 | 1    | 552  |
| cb15326_c7/f1p0/1319                                                                                                                        | gnl BL_ORD_ID 57950 cb8564_c84847/f1p0/2279                                                                                                                        | 1   | 1151 | 1150 | 1319 | 396  | 1549 | 1976 | 2145 |

|                         |                     |                          |                                                                                                                      |      |      |      |      |      |      |      |      |      |   |
|-------------------------|---------------------|--------------------------|----------------------------------------------------------------------------------------------------------------------|------|------|------|------|------|------|------|------|------|---|
| racy=0.998              |                     |                          |                                                                                                                      |      |      |      |      |      |      |      |      |      |   |
| cb6941_c2/flp0/1794     | gnl BL_ORD_ID 3443  | cb6941_c1/flp0/2504      | isoform=cb6941_c1;full_length_coverage=1;non_full_length_coverage=0;isoform_length=2504;expected_accuracy=0.997      | 1    | 1097 | 1096 | 1774 | 27   | 1116 | 1828 | 250  | 2    |   |
| cb7498_c3/flp0/1859     | gnl BL_ORD_ID 51292 | cb7498_c1/flp0/2180      |                                                                                                                      | 547  | 1650 | 6    | 551  | 1103 | 220  | 7    | 50   | 595  |   |
| cb8564_c10716/flp3/2179 | gnl BL_ORD_ID 12438 | cb8564_c125968/f2p3/2612 | isoform=cb8564_c125968;full_length_coverage=2;non_full_length_coverage=3;isoform_length=2612;expected_accuracy=0.997 | 258  | 2210 | 76   | 263  | 564  | 251  | 8    | 226  | 405  |   |
| cb5659_c78/flp0/2309    | gnl BL_ORD_ID 46024 | cb5659_c74/flp3/2885     | isoform=cb5659_c74;full_length_coverage=1;non_full_length_coverage=3;isoform_length=2885;expected_accuracy=0.994     | 10   | 1676 | 1675 | 2137 | 72   | 175  | 7    | 2337 | 279  | 9 |
| cb8564_c78858/flp0/2927 |                     |                          | isoform=cb8564_c78858;full_length_coverage=1;non_full_length_coverage=0;isoform_length=2927;expected_accuracy=0.995  |      |      |      |      |      |      |      |      |      |   |
| cb3292_c11/flp0/2790    | gnl BL_ORD_ID 56772 | cb8564_c71057/flp4/4091  |                                                                                                                      | 175  | 2927 | 1    | 174  | 1294 | 405  | 3    | 12   | 181  |   |
| cb3292_c11/flp0/2790    | gnl BL_ORD_ID 41083 | cb3292_c10/flp0/3715     | isoform=cb3292_c10;full_length_coverage=1;non_full_length_coverage=0;isoform_length=3715;expected_accuracy=0.993     | 1298 | 2788 | 1    | 1300 | 2235 | 371  | 5    | 817  | 2112 |   |
| cb7845_c2/flp0/2265     | gnl BL_ORD_ID 8537  | cb7845_c4/flp0/2414      | isoform=cb7845_c4;full_length_coverage=1;non_full_length_coverage=0;isoform_length=2414;expected_accuracy=0.994      | 183  | 2233 | 1    | 184  | 365  | 241  | 4    | 1    | 178  |   |

|                                                                                                                                                         |                                                                                                                                                                    |     |      |      |      |      |      |      |      |
|---------------------------------------------------------------------------------------------------------------------------------------------------------|--------------------------------------------------------------------------------------------------------------------------------------------------------------------|-----|------|------|------|------|------|------|------|
| acy=1.000<br>cb2097_c120/f1p0/1809<br>isoform=cb2097_c120;full_length_coverage=1;non_full_length_coverage=0;isoform_length=1809;expected_accuracy=0.994 | cy=0.997<br>gnl BL_ORD_ID 66706 cb2097_c89/f1p2/2414                                                                                                               | 1   | 1422 | 1420 | 1809 | 413  | 1834 | 1944 | 2333 |
| cb8564_c42513/f1p2/3770<br>isoform=cb8564_c42513;full_length_coverage=1;non_full_length_coverage=2;isoform_length=3770;expected_accuracy=0.997          | gnl BL_ORD_ID 15360 cb8564_c32914/f9p2/4297<br>isoform=cb8564_c32914;full_length_coverage=9;non_full_length_coverage=2;isoform_length=4297;expected_accuracy=1.000 | 1   | 2951 | 2947 | 3767 | 72   | 3008 | 3480 | 4297 |
| cb1489_c4/f1p0/3013<br>isoform=cb1489_c4;full_length_coverage=1;non_full_length_coverage=0;isoform_length=3013;expected_accuracy=0.993                  | gnl BL_ORD_ID 63666 cb1489_c2/f1p0/3842                                                                                                                            | 99  | 3013 | 1    | 103  | 959  | 3869 | 61   | 168  |
| cb965_c18/f1p0/2545<br>isoform=cb965_c18;full_length_coverage=1;non_full_length_coverage=0;isoform_length=2545;expected_accuracy=1.000                  | gnl BL_ORD_ID 20094 cb965_c9/f2p4/4285<br>isoform=cb965_c9;full_length_coverage=2;non_full_length_coverage=4;isoform_length=4285;expected_accuracy=0.999           | 1   | 1828 | 1831 | 2527 | 1526 | 3351 | 3579 | 4285 |
| cb8564_c70954/f1p0/2365                                                                                                                                 | gnl BL_ORD_ID 57978 cb8564_c85833/f1p0/2942                                                                                                                        | 1   | 1708 | 1707 | 2257 | 1    | 1708 | 2376 | 2926 |
| cb1772_c20/f1p0/3984                                                                                                                                    | gnl BL_ORD_ID 63938 cb1772_c19/f1p0/4042                                                                                                                           | 193 | 3722 | 1    | 194  | 441  | 3970 | 114  | 307  |
| cb5137_c53/f1p0/2672<br>isoform=cb5137_c53;full_length_coverage=1;non_full_length_coverage=0;isoform_length=2672;expected_accuracy=0.992                | gnl BL_ORD_ID 73312 cb5137_c30/f1p2/3623                                                                                                                           | 19  | 2565 | 2562 | 2672 | 847  | 3397 | 3501 | 3610 |
| cb8564_c38035/f1p0/2770                                                                                                                                 | gnl BL_ORD_ID 55464 cb8564_c42285/f1p0/3370                                                                                                                        | 1   | 2035 | 2033 | 2756 | 1    | 203  | 2226 | 295  |

|                                                                                                                                                |                     |                                                                                                                                                |     |      |      |      |     |          |      |          |
|------------------------------------------------------------------------------------------------------------------------------------------------|---------------------|------------------------------------------------------------------------------------------------------------------------------------------------|-----|------|------|------|-----|----------|------|----------|
|                                                                                                                                                |                     |                                                                                                                                                |     |      |      |      |     | 6        | 0    |          |
| cb8564_c18641/f1p0/2364                                                                                                                        | gnl BL_ORD_ID 54398 | cb8564_c24870/f1p0/2605                                                                                                                        | 15  | 1650 | 1645 | 2321 | 38  | 167<br>3 | 1883 | 255<br>9 |
| cb8564_c92076/f1p0/3037                                                                                                                        | gnl BL_ORD_ID 15755 | cb8564_c4970/f1p0/3133<br>isoform=cb8564_c4970;full_length_coverage=1;non_full_length_coverage=0;isoform_length=3133;expected_accuracy=0.996   | 111 | 2954 | 1    | 112  | 292 | 313<br>3 | 1    | 111      |
| cb7126_c8/f1p0/1757                                                                                                                            | gnl BL_ORD_ID 4216  | cb7126_c5/f1p0/1933<br>isoform=cb7126_c5;full_length_coverage=1;non_full_length_coverage=0;isoform_length=1933;expected_accuracy=0.996         | 122 | 1749 | 1    | 125  | 295 | 192<br>1 | 33   | 157      |
| cb8564_c4766/f1p0/2565                                                                                                                         | gnl BL_ORD_ID 55688 | cb8564_c4747/f1p0/2838                                                                                                                         | 1   | 1336 | 1334 | 2377 | 225 | 155<br>9 | 1807 | 285<br>3 |
| cb8564_c34205/f6p1/2161<br>isoform=cb8564_c34205;full_length_coverage=6;non_full_length_coverage=1;isoform_length=2161;expected_accuracy=0.996 | gnl BL_ORD_ID 14555 | cb8564_c40580/f3p1/2616<br>isoform=cb8564_c40580;full_length_coverage=3;non_full_length_coverage=1;isoform_length=2616;expected_accuracy=0.992 | 1   | 1993 | 1991 | 2161 | 1   | 195<br>8 | 2204 | 237<br>3 |
| cb7377_c9/f1p0/2341                                                                                                                            | gnl BL_ORD_ID 8470  | cb7377_c2/f1p0/2583<br>isoform=cb7377_c2;full_length_coverage=1;non_full_length_coverage=0;isoform_length=2583;expected_accuracy=0.997         | 162 | 2233 | 1    | 162  | 418 | 248<br>8 | 128  | 290      |
| cb6388_c7/f1p1/2217<br>isoform=cb6388_c7;full_length_coverage=1;non_full_length_coverage=1;isoform_length=2217;expected_accuracy=0.999         | gnl BL_ORD_ID 4572  | cb6388_c3/f1p0/2513<br>isoform=cb6388_c3;full_length_coverage=1;non_full_length_coverage=0;isoform_length=2513;expected_accuracy=0.996         | 1   | 1379 | 1376 | 2206 | 31  | 141<br>0 | 1560 | 239<br>1 |
| cb2177_c32/f1p0/2567                                                                                                                           | gnl BL_ORD_ID 36019 | cb2177_c26/f1p2/3500                                                                                                                           | 1   | 1568 | 1567 | 2534 | 768 | 235      | 2526 | 350      |



|                                                                                                                                             |                                                                                                                                                            |     |      |      |      |     |      |      |     |   |
|---------------------------------------------------------------------------------------------------------------------------------------------|------------------------------------------------------------------------------------------------------------------------------------------------------------|-----|------|------|------|-----|------|------|-----|---|
| isoform=cb2177_c32;full_length_coverage=1;non_full_length_coverage=0;isoform_length=2567;expected_accuracy=0.990<br>cb8564_c43399/f1p0/2654 | isoform=cb2177_c26;full_length_coverage=1;non_full_length_coverage=2;isoform_length=3500;expected_accuracy=0.999                                           |     |      |      |      |     |      | 1    |     | 0 |
| isoform=cb8564_c43399;full_length_coverage=1;non_full_length_coverage=0;isoform_length=2654;expected_accuracy=0.999                         | gnl BL_ORD_ID 55866 cb8564_c47522/f1p0/2954                                                                                                                | 1   | 2367 | 2363 | 2653 | 1   | 234  | 2559 | 284 | 9 |
| cb955_c24/f1p2/2194                                                                                                                         | gnl BL_ORD_ID 22154 cb955_c13/f2p0/3026<br>isoform=cb955_c13;full_length_coverage=2;non_full_length_coverage=0;isoform_length=3026;expected_accuracy=0.998 | 1   | 1850 | 1849 | 2190 | 4   | 185  | 2641 | 298 | 2 |
| cb2122_c5/f1p0/3100<br>isoform=cb2122_c5;full_length_coverage=1;non_full_length_coverage=0;isoform_length=3100;expected_accuracy=0.999      | gnl BL_ORD_ID 34252 cb2122_c9/f1p0/3797<br>isoform=cb2122_c9;full_length_coverage=1;non_full_length_coverage=0;isoform_length=3797;expected_accuracy=0.997 | 160 | 3097 | 1    | 165  | 862 | 379  | 1    | 165 | 7 |
| cb6066_c7/f1p0/1915                                                                                                                         | gnl BL_ORD_ID 45957 cb6066_c2/f1p0/2806<br>isoform=cb6066_c2;full_length_coverage=1;non_full_length_coverage=0;isoform_length=2806;expected_accuracy=0.999 | 1   | 1074 | 1070 | 1899 | 3   | 107  | 1978 | 280 | 5 |
| cb12931_c15/f1p0/1493<br>isoform=cb12931_c15;full_length_coverage=1;non_full_length_coverage=0;isoform_length=1493;expected_accuracy=1.000  | gnl BL_ORD_ID 55170 cb8564_c34431/f1p0/3665                                                                                                                | 1   | 1106 | 1104 | 1492 | 4   | 1111 | 2791 | 317 | 9 |
| cb4233_c84/f1p1/2344                                                                                                                        | gnl BL_ORD_ID 71860 cb4233_c118/f1p0/3085                                                                                                                  | 227 | 2391 | 1    | 225  | 584 | 274  | 560  | 784 | 8 |
| cb8564_c47853/f1p0/2927                                                                                                                     | gnl BL_ORD_ID 17429 cb8564_c85447/f1p0/3196                                                                                                                | 1   | 2401 | 2400 | 2927 | 3   | 241  | 2660 | 319 |   |

|                                                                                                                                                  |                                                                                                                                                                           |     |      |      |      |     |      |      |      |   |
|--------------------------------------------------------------------------------------------------------------------------------------------------|---------------------------------------------------------------------------------------------------------------------------------------------------------------------------|-----|------|------|------|-----|------|------|------|---|
| isoform=cb8564_c47853;full_length_coverage=1;non_full_length_coverage=0;isoform_length=2927;expected_accuracy=0.991<br>cb8564_c88629/f1p0/3306   | isoform=cb8564_c85447;full_length_coverage=1;non_full_length_coverage=0;isoform_length=3196;expected_accuracy=0.997<br>gnl BL_ORD_ID 11236      cb8564_c145778/f9p1/3503  |     |      |      |      |     |      | 3    |      | 2 |
| isoform=cb8564_c88629;full_length_coverage=1;non_full_length_coverage=0;isoform_length=3306;expected_accuracy=0.999<br>cb8478_c37/f1p0/3192      | isoform=cb8564_c145778;full_length_coverage=9;non_full_length_coverage=1;isoform_length=3503;expected_accuracy=1.000<br>gnl BL_ORD_ID 51961      cb8478_c22/f1p0/3564     | 1   | 3122 | 3122 | 3306 | 1   | 3124 | 3306 | 3490 |   |
| isoform=cb2229_c66;full_length_coverage=60;non_full_length_coverage=1;isoform_length=2354;expected_accuracy=0.999<br>cb2229_c66/f60p1/2354       | isoform=cb2229_c24;full_length_coverage=1;non_full_length_coverage=0;isoform_length=2736;expected_accuracy=0.994<br>gnl BL_ORD_ID 37324      cb2229_c24/f1p0/2736         | 16  | 2659 | 2657 | 3154 | 1   | 2644 | 2998 | 3495 |   |
| isoform=cb1648_c4;full_length_coverage=10;non_full_length_coverage=3;isoform_length=2031;expected_accuracy=1.000<br>cb1648_c4/f10p3/2031         | isoform=cb8564_c132760;full_length_coverage=5;non_full_length_coverage=6;isoform_length=2734;expected_accuracy=0.999<br>gnl BL_ORD_ID 66333      cb1648_c27/f1p1/2264     | 1   | 1758 | 1759 | 2317 | 61  | 1821 | 2181 | 2736 |   |
| isoform=cb8564_c116345;full_length_coverage=1;non_full_length_coverage=1;isoform_length=2198;expected_accuracy=0.991<br>cb8564_c116345/f1p1/2198 | isoform=cb8564_c44123;full_length_coverage=1;non_full_length_coverage=3;isoform_length=2031;expected_accuracy=1.000<br>gnl BL_ORD_ID 66333      cb1648_c27/f1p1/2264      | 234 | 2031 | 7    | 234  | 382 | 2178 | 9    | 233  |   |
| isoform=cb8564_c116345;full_length_coverage=1;non_full_length_coverage=1;isoform_length=2198;expected_accuracy=0.991<br>cb8564_c116345/f1p1/2198 | isoform=cb8564_c132760;full_length_coverage=5;non_full_length_coverage=6;isoform_length=2734;expected_accuracy=0.999<br>gnl BL_ORD_ID 11911      cb8564_c132760/f5p6/2734 | 369 | 2142 | 5    | 373  | 876 | 2653 | 4    | 369  |   |
| isoform=cb8564_c47011;full_length_coverage=1;non_full_length_coverage=1;isoform_length=3100;expected_accuracy=0.991<br>cb8564_c47011/f1p0/3100   | isoform=cb4098_c13;full_length_coverage=2;non_full_length_coverage=1;isoform_length=3772;expected_accuracy=0.999<br>gnl BL_ORD_ID 55522      cb8564_c44123/f1p1/3230      | 18  | 2306 | 2301 | 2934 | 15  | 2294 | 2532 | 3164 |   |
| isoform=cb4098_c71;full_length_coverage=2;non_full_length_coverage=1;isoform_length=3728;expected_accuracy=0.999<br>cb4098_c71/f2p1/3728         | isoform=cb4098_c13;full_length_coverage=2;non_full_length_coverage=1;isoform_length=3772;expected_accuracy=0.999<br>gnl BL_ORD_ID 40754      cb4098_c13/f2p1/3772         | 108 | 1973 | 1974 | 3728 | 1   | 1867 | 2002 | 3758 |   |

|                                                                                                                                                                           |                                                                                                                                                                                                  |      |      |      |      |      |      |      |      |
|---------------------------------------------------------------------------------------------------------------------------------------------------------------------------|--------------------------------------------------------------------------------------------------------------------------------------------------------------------------------------------------|------|------|------|------|------|------|------|------|
| <p>racy=1.000<br/> cb8564_c127097/f1p0/2380<br/> isoform=cb8564_c127097;full_length_coverage=1;non_full_length_coverage=0;isoform_length=2380;expected_accuracy=0.994</p> | <p>acy=0.998<br/> gnl BL_ORD_ID 9453      cb8564_c113395/f1p0/2950<br/> isoform=cb8564_c113395;full_length_coverage=1;non_full_length_coverage=0;isoform_length=2950;expected_accuracy=0.995</p> | 1    | 1714 | 1713 | 2379 | 26   | 1738 | 2283 | 2950 |
| <p>cb8564_c20384/f1p4/2475<br/> isoform=cb8564_c20384;full_length_coverage=1;non_full_length_coverage=4;isoform_length=2475;expected_accuracy=0.999</p>                   | <p>gnl BL_ORD_ID 13109      cb8564_c16444/f5p10/3053<br/> isoform=cb8564_c16444;full_length_coverage=5;non_full_length_coverage=10;isoform_length=3053;expected_accuracy=0.992</p>               | 1    | 1492 | 1493 | 2475 | 551  | 2042 | 1385 | 2368 |
| <p>cb8564_c41162/f1p0/3158<br/> isoform=cb8564_c41162;full_length_coverage=1;non_full_length_coverage=3;isoform_length=3158;expected_accuracy=0.999</p>                   | <p>gnl BL_ORD_ID 55246      cb8564_c36343/f1p0/3448<br/> isoform=cb8564_c36343;full_length_coverage=1;non_full_length_coverage=3;isoform_length=3448;expected_accuracy=0.999</p>                 | 21   | 2553 | 2548 | 3038 | 21   | 2567 | 2698 | 3188 |
| <p>cb8564_c72639/f1p3/2409<br/> isoform=cb8564_c72639;full_length_coverage=1;non_full_length_coverage=3;isoform_length=2409;expected_accuracy=0.999</p>                   | <p>gnl BL_ORD_ID 57107      cb8564_c83478/f1p0/3224<br/> isoform=cb8564_c83478;full_length_coverage=1;non_full_length_coverage=3;isoform_length=3224;expected_accuracy=0.999</p>                 | 288  | 2409 | 36   | 288  | 374  | 2497 | 2    | 254  |
| <p>cb3183_c8/f1p3/3030<br/> isoform=cb3183_c8;full_length_coverage=1;non_full_length_coverage=3;isoform_length=3030;expected_accuracy=0.999</p>                           | <p>gnl BL_ORD_ID 37888      cb3183_c6/f2p4/3666<br/> isoform=cb3183_c6;full_length_coverage=2;non_full_length_coverage=4;isoform_length=3666;expected_accuracy=1.000</p>                         | 147  | 3029 | 1    | 148  | 785  | 3666 | 211  | 358  |
| <p>cb8564_c188095/f1p0/3177<br/> isoform=cb8564_c188095;full_length_coverage=1;non_full_length_coverage=0;isoform_length=3177;expected_accuracy=0.998</p>                 | <p>gnl BL_ORD_ID 55376      cb8564_c39821/f1p0/3886<br/> isoform=cb8564_c39821;full_length_coverage=1;non_full_length_coverage=0;isoform_length=3886;expected_accuracy=0.998</p>                 | 1345 | 3152 | 1    | 1346 | 1943 | 3735 | 1    | 1317 |
| <p>cb5896_c134/f1p0/4910<br/> isoform=cb5896_c134;full_length_coverage=1;non_full_length_coverage=0;isoform_length=4910;expected_accuracy=0.999</p>                       | <p>gnl BL_ORD_ID 67969      cb18734_c0/f1p0/5102<br/> isoform=cb18734_c0;full_length_coverage=1;non_full_length_coverage=0;isoform_length=5102;expected_accuracy=0.999</p>                       | 1    | 4256 | 4255 | 4870 | 62   | 4328 | 4439 | 5056 |

|                                                                                                                                                |                                                                                                                                                                         |     |      |      |      |      |      |      |      |  |
|------------------------------------------------------------------------------------------------------------------------------------------------|-------------------------------------------------------------------------------------------------------------------------------------------------------------------------|-----|------|------|------|------|------|------|------|--|
| uracy=0.999                                                                                                                                    |                                                                                                                                                                         |     |      |      |      |      |      |      |      |  |
| cb8564_c37802/f1p0/2973                                                                                                                        | gnl BL_ORD_ID 15464      cb8564_c48625/f1p1/3232<br>isoform=cb8564_c48625;full_length_coverage=1;non_full_length_coverage=1;isoform_length=3232;expected_accuracy=0.991 | 1   | 2292 | 2287 | 2755 | 1    | 2269 | 2764 | 3232 |  |
| cb8564_c46939/f1p1/2926                                                                                                                        | gnl BL_ORD_ID 55551      cb8564_c44964/f1p0/3508                                                                                                                        | 1   | 2134 | 2130 | 2870 | 1    | 2140 | 2245 | 2988 |  |
| cb6407_c4/f3p0/2587<br>isoform=cb6407_c4;full_length_coverage=3;non_full_length_coverage=0;isoform_length=2587;expected_accuracy=1.000         | gnl BL_ORD_ID 6061      cb6407_c18/f1p1/2768<br>isoform=cb6407_c18;full_length_coverage=1;non_full_length_coverage=1;isoform_length=2768;expected_accuracy=0.996        | 1   | 1340 | 1337 | 2587 | 1    | 1338 | 1503 | 2753 |  |
| cb8564_c73607/f1p0/2892<br>isoform=cb8564_c73607;full_length_coverage=1;non_full_length_coverage=0;isoform_length=2892;expected_accuracy=0.995 | gnl BL_ORD_ID 56103      cb8564_c69762/f2p0/4058                                                                                                                        | 1   | 2114 | 2115 | 2892 | 6    | 2119 | 2230 | 3009 |  |
| cb8564_c74556/f2p1/3463<br>isoform=cb8564_c74556;full_length_coverage=2;non_full_length_coverage=1;isoform_length=3463;expected_accuracy=0.997 | gnl BL_ORD_ID 52659      cb8564_c10244/f1p0/4022                                                                                                                        | 1   | 2906 | 2904 | 3391 | 58   | 2965 | 3383 | 3870 |  |
| cb8564_c37361/f1p0/3076                                                                                                                        | gnl BL_ORD_ID 57017      cb8564_c80370/f1p0/3493                                                                                                                        | 119 | 2481 | 2477 | 3070 | 3085 | 723  | 622  | 29   |  |
| cb4211_c3/f2p5/1253<br>isoform=cb4211_c3;full_length_coverage=2;non_full_length_coverage=5;isoform_length=1253;expected_accuracy=1.000         | gnl BL_ORD_ID 71851      cb4211_c4/f1p2/3385                                                                                                                            | 155 | 1253 | 8    | 156  | 2200 | 3298 | 1    | 148  |  |
| cb8564_c146882/f3p8/4113<br>isoform=cb8564_c146882;full_length_coverage=3;non_                                                                 | gnl BL_ORD_ID 55207      cb8564_c35399/f1p0/4553                                                                                                                        | 184 | 4111 | 10   | 185  | 396  | 4324 | 11   | 179  |  |

|                                                                                                                      |                                                                                                                      |                          |      |      |      |      |      |          |                  |
|----------------------------------------------------------------------------------------------------------------------|----------------------------------------------------------------------------------------------------------------------|--------------------------|------|------|------|------|------|----------|------------------|
| full_length_coverage=8;isoform_length=4113;expected_accuracy=0.998                                                   |                                                                                                                      |                          |      |      |      |      |      |          |                  |
| cb3301_c3/f1p0/2960                                                                                                  | gnl BL_ORD_ID 41447                                                                                                  | cb3301_c0/f1p0/3662      |      |      |      |      |      |          |                  |
| isoform=cb3301_c3;full_length_coverage=1;non_full_length_coverage=0;isoform_length=2960;expected_accuracy=0.996      | isoform=cb3301_c0;full_length_coverage=1;non_full_length_coverage=0;isoform_length=3662;expected_accuracy=0.994      |                          | 1368 | 2946 | 1    | 1369 | 2063 | 366<br>2 | 90<br>145<br>9   |
| cb8564_c68941/f7p1/2708                                                                                              | gnl BL_ORD_ID 10231                                                                                                  | cb8564_c107778/f4p4/2753 |      |      |      |      |      |          |                  |
| isoform=cb8564_c68941;full_length_coverage=7;non_full_length_coverage=1;isoform_length=2708;expected_accuracy=1.000  | isoform=cb8564_c107778;full_length_coverage=4;non_full_length_coverage=4;isoform_length=2753;expected_accuracy=0.996 |                          | 583  | 2708 | 62   | 585  | 633  | 275<br>3 | 10<br>525        |
| cb293_c5/f1p0/4488                                                                                                   | gnl BL_ORD_ID 69536                                                                                                  | cb293_c7/f1p0/4528       |      |      |      |      |      |          |                  |
|                                                                                                                      |                                                                                                                      |                          | 2    | 2289 | 2288 | 4337 | 15   | 230<br>2 | 2411<br>443<br>2 |
| cb8564_c36731/f1p2/2761                                                                                              | gnl BL_ORD_ID 55531                                                                                                  | cb8564_c44297/f1p0/3146  |      |      |      |      |      |          |                  |
|                                                                                                                      |                                                                                                                      |                          | 1    | 1977 | 1972 | 2737 | 1    | 197<br>7 | 2362<br>312<br>7 |
| cb8564_c102411/f1p1/2832                                                                                             | gnl BL_ORD_ID 14785                                                                                                  | cb8564_c36335/f1p0/3172  |      |      |      |      |      |          |                  |
| isoform=cb8564_c102411;full_length_coverage=1;non_full_length_coverage=1;isoform_length=2832;expected_accuracy=0.994 | isoform=cb8564_c36335;full_length_coverage=1;non_full_length_coverage=0;isoform_length=3172;expected_accuracy=0.997  |                          | 231  | 2770 | 2    | 234  | 631  | 317<br>2 | 3<br>235         |
| cb8052_c0/f2p0/1908                                                                                                  | gnl BL_ORD_ID 6981                                                                                                   | cb8052_c1/f1p0/2472      |      |      |      |      |      |          |                  |
| isoform=cb8052_c0;full_length_coverage=2;non_full_length_coverage=0;isoform_length=1908;expected_accuracy=0.998      | isoform=cb8052_c1;full_length_coverage=1;non_full_length_coverage=0;isoform_length=2472;expected_accuracy=0.996      |                          | 1    | 1081 | 1080 | 1908 | 112  | 1191     | 1644<br>247<br>2 |
| cb6376_c0/f2p0/2298                                                                                                  | gnl BL_ORD_ID 3753                                                                                                   | cb6376_c2/f1p0/2859      |      |      |      |      |      |          |                  |
| isoform=cb6376_c0;full_length_coverage=2;non_full_length_coverage=0;isoform_length=2298;expected_accuracy=0.996      | isoform=cb6376_c2;full_length_coverage=1;non_full_length_coverage=0;isoform_length=2859;expected_accuracy=0.997      |                          | 1    | 1438 | 1437 | 2294 | 33   | 145<br>9 | 2004<br>285<br>9 |



|                                                                                                                                                                                                                     |                                                                                                                                                                |     |      |      |      |     |          |      |          |
|---------------------------------------------------------------------------------------------------------------------------------------------------------------------------------------------------------------------|----------------------------------------------------------------------------------------------------------------------------------------------------------------|-----|------|------|------|-----|----------|------|----------|
| ull_length_coverage=0;isoform_length=2817;expected_accuracy=0.992<br>cb8564_c45300/f1p4/3014<br>isoform=cb8564_c45300;full_length_coverage=1;non_full_length_coverage=4;isoform_length=3014;expected_accuracy=0.996 | ll_length_coverage=1;isoform_length=3267;expected_accuracy=0.995<br>gnl BL_ORD_ID 56041 cb8564_c53077/f1p2/3406                                                | 243 | 3014 | 1    | 246  | 515 | 328<br>7 | 1    | 243      |
| cb3599_c13/f1p0/2987<br>isoform=cb3599_c13;full_length_coverage=1;non_full_length_coverage=0;isoform_length=2987;expected_accuracy=0.998                                                                            | gnl BL_ORD_ID 41082 cb3599_c17/f12p0/3112<br>isoform=cb3599_c17;full_length_coverage=12;non_full_length_coverage=0;isoform_length=3112;expected_accuracy=1.000 | 1   | 2339 | 2334 | 2987 | 1   | 233<br>9 | 2458 | 3111     |
| cb3586_c11/f1p0/2822<br>isoform=cb3586_c11;full_length_coverage=1;non_full_length_coverage=0;isoform_length=2822;expected_accuracy=0.995                                                                            | gnl BL_ORD_ID 41149 cb3586_c2/f1p0/3545<br>isoform=cb3586_c2;full_length_coverage=1;non_full_length_coverage=0;isoform_length=3545;expected_accuracy=0.998     | 278 | 2822 | 2    | 278  | 950 | 349<br>5 | 54   | 335      |
| cb1770_c25/f1p0/3573                                                                                                                                                                                                | gnl BL_ORD_ID 33845 cb1770_c3/f3p0/3565<br>isoform=cb1770_c3;full_length_coverage=3;non_full_length_coverage=0;isoform_length=3565;expected_accuracy=0.999     | 1   | 1910 | 1908 | 3369 | 19  | 193<br>1 | 2096 | 356<br>5 |
| cb2831_c22/f1p0/2102                                                                                                                                                                                                | gnl BL_ORD_ID 38322 cb2831_c7/f3p0/2914<br>isoform=cb2831_c7;full_length_coverage=3;non_full_length_coverage=0;isoform_length=2914;expected_accuracy=1.000     | 1   | 1598 | 1598 | 2097 | 65  | 166<br>1 | 2401 | 291<br>4 |
| cb1138_c21/f1p4/3386<br>isoform=cb1138_c21;full_length_coverage=1;non_full_length_coverage=4;isoform_length=3386;expected_accuracy=0.995                                                                            | gnl BL_ORD_ID 59178 cb1138_c38/f1p0/3611                                                                                                                       | 1   | 2841 | 2836 | 3321 | 1   | 284<br>2 | 2946 | 343<br>1 |

|                          |                                                                                                                                                                          |      |      |      |      |      |      |      |      |
|--------------------------|--------------------------------------------------------------------------------------------------------------------------------------------------------------------------|------|------|------|------|------|------|------|------|
| cb8564_c77604/f1p0/3355  | gnl BL_ORD_ID 17154      cb8564_c82503/f1p0/4455<br>isoform=cb8564_c82503;full_length_coverage=1;non_full_length_coverage=0;isoform_length=4455;expected_accuracy=0.995  | 12   | 2619 | 2617 | 3351 | 47   | 2632 | 3722 | 4453 |
| cb8564_c116701/f1p0/2471 | gnl BL_ORD_ID 9882      cb8564_c116615/f1p0/3195<br>isoform=cb8564_c116701;full_length_coverage=1;non_full_length_coverage=0;isoform_length=2471;expected_accuracy=0.992 | 1    | 1929 | 1927 | 2471 | 603  | 2527 | 2631 | 3175 |
| cb4977_c0/f1p0/3210      | gnl BL_ORD_ID 44251      cb4977_c1/f1p0/3648<br>isoform=cb4977_c0;full_length_coverage=1;non_full_length_coverage=0;isoform_length=3210;expected_accuracy=0.994          | 23   | 2832 | 2830 | 3210 | 1    | 2825 | 2998 | 3381 |
| cb2707_c24/f1p0/2640     | gnl BL_ORD_ID 36995      cb2707_c28/f1p1/3570<br>isoform=cb2707_c28;full_length_coverage=1;non_full_length_coverage=1;isoform_length=3570;expected_accuracy=0.996        | 1    | 2430 | 2425 | 2649 | 309  | 2738 | 3245 | 3469 |
| cb3411_c18/f1p0/3101     | gnl BL_ORD_ID 39887      cb3411_c9/f1p0/3617<br>isoform=cb3411_c18;full_length_coverage=1;non_full_length_coverage=0;isoform_length=3101;expected_accuracy=0.998         | 1238 | 3100 | 104  | 1241 | 1756 | 3617 | 258  | 1393 |
| cb1496_c3/f1p2/1807      | gnl BL_ORD_ID 30710      cb1496_c9/f1p1/3684<br>isoform=cb1496_c3;full_length_coverage=1;non_full_length_coverage=2;isoform_length=1807;expected_accuracy=0.994          | 440  | 1800 | 58   | 444  | 2304 | 3664 | 6    | 390  |
| cb4528_c29/f1p0/1646     | gnl BL_ORD_ID 43229      cb4528_c40/f4p0/1916<br>isoform=cb4528_c40;full_length_coverage=4;non_full_l                                                                    | 1    | 1441 | 1439 | 1580 | 30   | 1470 | 1775 | 1916 |



|                                                                                                                     |                                                                                                                     |      |      |      |      |      |      |      |      |  |
|---------------------------------------------------------------------------------------------------------------------|---------------------------------------------------------------------------------------------------------------------|------|------|------|------|------|------|------|------|--|
|                                                                                                                     | ength_coverage=0;isoform_length=1916;expected_accuracy=1.000                                                        |      |      |      |      |      |      |      |      |  |
| cb2918_c29/f1p0/2588                                                                                                | gnl BL_ORD_ID 70088 cb2918_c33/f1p3/2817                                                                            | 18   | 2300 | 2297 | 2554 | 52   | 2335 | 2445 | 2702 |  |
| cb6716_c4/f1p0/2291                                                                                                 | gnl BL_ORD_ID 47663 cb6716_c1/f1p1/2898                                                                             | 1    | 1816 | 1817 | 2239 | 70   | 1886 | 2167 | 2584 |  |
| cb8564_c72800/f1p0/2322                                                                                             |                                                                                                                     |      |      |      |      |      |      |      |      |  |
| isoform=cb8564_c72800;full_length_coverage=1;non_full_length_coverage=0;isoform_length=2322;expected_accuracy=0.996 | gnl BL_ORD_ID 57089 cb8564_c82833/f1p0/2593                                                                         | 210  | 2269 | 2    | 212  | 376  | 2435 | 1    | 212  |  |
| cb13434_c28/f1p1/1476                                                                                               |                                                                                                                     |      |      |      |      |      |      |      |      |  |
| isoform=cb13434_c28;full_length_coverage=1;non_full_length_coverage=1;isoform_length=1476;expected_accuracy=0.997   | gnl BL_ORD_ID 53863 cb8564_c4654/f1p2/3045                                                                          | 8    | 728  | 727  | 1418 | 8    | 730  | 2131 | 2817 |  |
| cb14517_c18/f1p1/2779                                                                                               | gnl BL_ORD_ID 30661 cb14517_c1/f4p1/5912                                                                            |      |      |      |      |      |      |      |      |  |
| isoform=cb14517_c18;full_length_coverage=1;non_full_length_coverage=1;isoform_length=2779;expected_accuracy=0.990   | isoform=cb14517_c1;full_length_coverage=4;non_full_length_coverage=1;isoform_length=5912;expected_accuracy=0.999    | 1339 | 2779 | 1    | 1343 | 4387 | 5830 | 64   | 1409 |  |
| cb8564_c78992/f1p0/2856                                                                                             | gnl BL_ORD_ID 16701 cb8564_c69366/f5p4/2938                                                                         |      |      |      |      |      |      |      |      |  |
|                                                                                                                     | isoform=cb8564_c69366;full_length_coverage=5;non_full_length_coverage=4;isoform_length=2938;expected_accuracy=1.000 | 196  | 2645 | 1    | 196  | 72   | 2523 | 10   | 205  |  |
| cb8564_c89322/f1p0/2588                                                                                             | gnl BL_ORD_ID 17419 cb8564_c87724/f1p0/2766                                                                         |      |      |      |      |      |      |      |      |  |
|                                                                                                                     | isoform=cb8564_c87724;full_length_coverage=1;non_full_length_coverage=0;isoform_length=2766;expected_accuracy=0.993 | 397  | 2588 | 5    | 402  | 534  | 2718 | 1    | 395  |  |

|                          |                                                                                                                                                                           |      |      |      |      |      |          |      |          |
|--------------------------|---------------------------------------------------------------------------------------------------------------------------------------------------------------------------|------|------|------|------|------|----------|------|----------|
| cb910_c16/f1p2/3352      | gnl BL_ORD_ID 21892      cb910_c15/f1p2/4577<br>isoform=cb910_c15;full_length_coverage=1;non_full_length_coverage=2;isoform_length=4577;expected_accuracy=0.997           | 1500 | 3367 | 1    | 1501 | 2127 | 398<br>8 | 208  | 169<br>7 |
| cb2177_c32/f1p0/2567     | gnl BL_ORD_ID 35944      cb2177_c49/f1p2/3375<br>isoform=cb2177_c32;full_length_coverage=1;non_full_length_coverage=0;isoform_length=2567;expected_accuracy=0.990         | 1    | 1568 | 1567 | 2543 | 650  | 222<br>4 | 2399 | 337<br>5 |
| cb8564_c40764/f1p0/2563  | gnl BL_ORD_ID 14556      cb8564_c45150/f1p0/2940<br>isoform=cb8564_c40764;full_length_coverage=1;non_full_length_coverage=0;isoform_length=2563;expected_accuracy=0.997   | 1    | 2166 | 2162 | 2563 | 1    | 214<br>8 | 2355 | 275<br>5 |
| cb8564_c118659/f2p0/3437 | gnl BL_ORD_ID 11650      cb8564_c152526/f1p6/3802<br>isoform=cb8564_c118659;full_length_coverage=2;non_full_length_coverage=0;isoform_length=3437;expected_accuracy=0.994 | 1    | 2906 | 2907 | 3427 | 85   | 301<br>5 | 3282 | 380<br>2 |
| cb3427_c5/f1p0/3487      | gnl BL_ORD_ID 39943      cb3427_c4/f1p0/3709<br>isoform=cb3427_c5;full_length_coverage=1;non_full_length_coverage=0;isoform_length=3487;expected_accuracy=0.997           | 1    | 3084 | 3086 | 3447 | 43   | 312<br>9 | 3351 | 370<br>9 |
| cb12714_c29/f1p2/1583    | gnl BL_ORD_ID 58179      cb8564_c90747/f1p0/2795                                                                                                                          | 1    | 1296 | 1293 | 1597 | 1    | 129<br>6 | 2336 | 264<br>0 |
| cb2208_c27/f1p0/2987     | gnl BL_ORD_ID 69620      cb2208_c18/f1p0/3335                                                                                                                             | 2    | 2173 | 2171 | 2949 | 73   | 225<br>2 | 2486 | 326<br>4 |
| cb8564_c53401/f1p1/3828  | gnl BL_ORD_ID 14193      cb8564_c31973/f2p1/4589<br>isoform=cb8564_c31973;full_length_coverage=2;non_full_length_coverage=0;isoform_length=4589;expected_accuracy=0.997   | 2    | 2988 | 2984 | 3601 | 69   | 305<br>5 | 3965 | 458<br>6 |

|                          |                                                                                                                                                                                                                                                   |     |      |      |      |      |      |      |      |
|--------------------------|---------------------------------------------------------------------------------------------------------------------------------------------------------------------------------------------------------------------------------------------------|-----|------|------|------|------|------|------|------|
| cb567_c14/f1p0/3377      | ll_length_coverage=1;isoform_length=4589;expected_accuracy=0.996<br>gnl BL_ORD_ID 45927                      cb567_c3/f1p0/3308<br>isoform=cb567_c3;full_length_coverage=1;non_full_length_coverage=0;isoform_length=3308;expected_accuracy=1.000 | 381 | 3058 | 94   | 383  | 631  | 3308 | 1    | 293  |
| cb8564_c43601/f1p0/2228  | gnl BL_ORD_ID 16946                      cb8564_c49998/f1p1/4102<br>isoform=cb8564_c49998;full_length_coverage=1;non_full_length_coverage=1;isoform_length=4102;expected_accuracy=0.998                                                           | 1   | 1814 | 1814 | 2071 | 1667 | 3479 | 3844 | 4102 |
| cb8564_c128725/f1p1/2771 | gnl BL_ORD_ID 10510                      cb8564_c111713/f6p2/3032<br>isoform=cb8564_c111713;full_length_coverage=6;non_full_length_coverage=1;isoform_length=2771;expected_accuracy=1.000                                                         | 1   | 2669 | 2664 | 2771 | 1    | 2642 | 2751 | 2859 |
| cb12931_c15/f1p0/1493    | gnl BL_ORD_ID 13273                      cb8564_c188193/f1p0/2849<br>isoform=cb12931_c15;full_length_coverage=1;non_full_length_coverage=0;isoform_length=1493;expected_accuracy=1.000                                                            | 1   | 1106 | 1104 | 1492 | 1    | 1102 | 2461 | 2849 |
| cb396_c42/f1p0/2343      | gnl BL_ORD_ID 39524                      cb396_c4/f9p0/2621<br>isoform=cb396_c4;full_length_coverage=9;non_full_length_coverage=0;isoform_length=2621;expected_accuracy=1.000                                                                     | 1   | 1458 | 1457 | 2346 | 99   | 1555 | 1725 | 2618 |
| cb8564_c75977/f1p0/2165  | gnl BL_ORD_ID 57894                      cb8564_c83545/f1p0/3678                                                                                                                                                                                  | 1   | 1393 | 1394 | 2135 | 63   | 1455 | 2743 | 3480 |
| cb401_c50/f1p0/2173      | gnl BL_ORD_ID 70878                      cb401_c109/f1p1/2463<br>isoform=cb401_c50;full_length_coverage=1;non_full_length_coverage=0;isoform_length=2173;expected_accuracy=1.000                                                                  | 96  | 2171 | 1    | 101  | 266  | 2338 | 25   | 125  |

---

|                                                             |                                                                                                                                          |                          |     |      |      |      |      |          |      |          |
|-------------------------------------------------------------|------------------------------------------------------------------------------------------------------------------------------------------|--------------------------|-----|------|------|------|------|----------|------|----------|
| ngth_coverage=0;isoform_length=2173;expected_accuracy=0.998 |                                                                                                                                          |                          |     |      |      |      |      |          |      |          |
| cb2279_c20/f1p0/1654                                        | gnl BL_ORD_ID 36528<br>isoform=cb2279_c4;full_length_coverage=1;non_full_length_coverage=2;isoform_length=2606;expected_accuracy=0.996   | cb2279_c4/f1p2/2606      | 212 | 1455 | 24   | 214  | 1357 | 260<br>2 | 11   | 201      |
| cb12931_c15/f1p0/1493                                       | gnl BL_ORD_ID 11085<br>isoform=cb12931_c15;full_length_coverage=1;non_full_length_coverage=0;isoform_length=1493;expected_accuracy=1.000 | cb8564_c115872/f1p0/2750 | 1   | 1106 | 1104 | 1488 | 1    | 1104     | 2368 | 275<br>0 |
| cb18537_c0/f1p0/1839                                        | gnl BL_ORD_ID 54218<br>isoform=cb18537_c0;full_length_coverage=1;non_full_length_coverage=0;isoform_length=1839;expected_accuracy=0.993  | cb8564_c20754/f1p0/2472  | 1   | 1495 | 1492 | 1789 | 26   | 152<br>2 | 2166 | 246<br>3 |
| cb7849_c18/f1p0/2052                                        | gnl BL_ORD_ID 50752<br>isoform=cb7849_c18;full_length_coverage=1;non_full_length_coverage=0;isoform_length=2052;expected_accuracy=0.991  | cb7849_c20/f1p0/2279     | 12  | 1375 | 1373 | 2048 | 22   | 138<br>5 | 1518 | 219<br>8 |
| cb4509_c18/f1p0/2940                                        | gnl BL_ORD_ID 72624<br>isoform=cb4509_c18;full_length_coverage=1;non_full_length_coverage=0;isoform_length=2940;expected_accuracy=0.997  | cb4509_c10/f1p1/3560     | 1   | 1499 | 1499 | 2940 | 243  | 174<br>1 | 2113 | 355<br>4 |
| cb1955_c15/f1p0/2361                                        | gnl BL_ORD_ID 36339<br>isoform=cb1955_c43;full_length_coverage=2;non_full_length_coverage=0;isoform_length=2634;expected_accuracy=1.000  | cb1955_c43/f2p0/2634     | 1   | 1505 | 1503 | 2278 | 74   | 157<br>9 | 1858 | 263<br>4 |

---

|                                                                                                                                                |                                                                                                                                                                           |     |      |      |      |      |      |      |      |
|------------------------------------------------------------------------------------------------------------------------------------------------|---------------------------------------------------------------------------------------------------------------------------------------------------------------------------|-----|------|------|------|------|------|------|------|
| cb8564_c54461/f1p0/2024<br>isoform=cb8564_c54461;full_length_coverage=1;non_full_length_coverage=0;isoform_length=2024;expected_accuracy=0.992 | gnl BL_ORD_ID 10792      cb8564_c117151/f1p0/2256<br>isoform=cb8564_c117151;full_length_coverage=1;non_full_length_coverage=0;isoform_length=2256;expected_accuracy=0.993 | 671 | 2024 | 7    | 670  | 868  | 2233 | 1    | 670  |
| cb9061_c16/f1p1/2248<br>isoform=cb9061_c16;full_length_coverage=1;non_full_length_coverage=1;isoform_length=2248;expected_accuracy=0.999       | gnl BL_ORD_ID 58527      cb9061_c19/f1p0/2376                                                                                                                             | 1   | 1438 | 1439 | 2189 | 36   | 1473 | 1581 | 2331 |
| cb3759_c6/f1p0/2298                                                                                                                            | gnl BL_ORD_ID 70597      cb3759_c2/f1p0/3671                                                                                                                              | 1   | 1727 | 1729 | 2238 | 71   | 1797 | 2639 | 3148 |
| cb792_c53/f1p0/3930                                                                                                                            | gnl BL_ORD_ID 8413      cb792_c27/f1p3/4257<br>isoform=cb792_c27;full_length_coverage=1;non_full_length_coverage=3;isoform_length=4257;expected_accuracy=0.993            | 1   | 1842 | 1838 | 3677 | 442  | 2268 | 2399 | 4225 |
| cb4374_c3/f1p0/2557<br>isoform=cb4374_c3;full_length_coverage=1;non_full_length_coverage=0;isoform_length=2557;expected_accuracy=0.997         | gnl BL_ORD_ID 72517      cb4374_c5/f1p0/2755                                                                                                                              | 1   | 2030 | 2027 | 2556 | 15   | 1990 | 2230 | 2762 |
| cb5466_c1/f1p0/2860                                                                                                                            | gnl BL_ORD_ID 47101      cb5466_c0/f1p0/3093<br>isoform=cb5466_c0;full_length_coverage=1;non_full_length_coverage=0;isoform_length=3093;expected_accuracy=0.995           | 121 | 2744 | 1    | 120  | 470  | 3093 | 44   | 162  |
| cb822_c36/f4p1/2420<br>isoform=cb822_c36;full_length_coverage=4;non_full_length_coverage=1;isoform_length=2420;expected_accuracy=1.000         | gnl BL_ORD_ID 51002      cb822_c19/f1p2/4163                                                                                                                              | 655 | 2417 | 96   | 656  | 2386 | 4147 | 2    | 562  |

|                         |                                                                                                                                                                         |     |      |      |      |      |      |      |      |
|-------------------------|-------------------------------------------------------------------------------------------------------------------------------------------------------------------------|-----|------|------|------|------|------|------|------|
| cb8564_c40823/f1p2/3537 | gnl BL_ORD_ID 16467      cb8564_c49872/f2p1/3689<br>isoform=cb8564_c49872;full_length_coverage=2;non_full_length_coverage=1;isoform_length=3689;expected_accuracy=1.000 | 1   | 1897 | 1897 | 3378 | 137  | 2031 | 2209 | 3689 |
| cb6376_c0/f2p0/2298     | gnl BL_ORD_ID 4338      cb6376_c1/f1p0/2877<br>isoform=cb6376_c0;full_length_coverage=2;non_full_length_coverage=0;isoform_length=2298;expected_accuracy=0.996          | 1   | 1438 | 1437 | 2292 | 23   | 1477 | 2022 | 2877 |
| cb8564_c45300/f1p4/3014 | gnl BL_ORD_ID 55623      cb8564_c47027/f1p0/3544<br>isoform=cb8564_c45300;full_length_coverage=1;non_full_length_coverage=4;isoform_length=3014;expected_accuracy=0.996 | 243 | 3014 | 1    | 246  | 401  | 3198 | 1    | 244  |
| cb5896_c10/f2p1/2427    | gnl BL_ORD_ID 44558      cb5896_c2/f6p2/2670<br>isoform=cb5896_c10;full_length_coverage=2;non_full_length_coverage=1;isoform_length=2427;expected_accuracy=0.998        | 1   | 1304 | 1303 | 2427 | 54   | 1357 | 1482 | 2609 |
| cb8564_c38035/f1p0/2770 | gnl BL_ORD_ID 56722      cb8564_c54360/f1p0/3040<br>isoform=cb8564_c38035;full_length_coverage=1;non_full_length_coverage=0;isoform_length=2770;expected_accuracy=0.999 | 1   | 2035 | 2033 | 2745 | 1    | 2038 | 2195 | 2908 |
| cb7781_c0/f2p0/1925     | gnl BL_ORD_ID 7844      cb7781_c1/f1p0/2534<br>isoform=cb7781_c0;full_length_coverage=2;non_full_length_coverage=0;isoform_length=1925;expected_accuracy=0.999          | 500 | 1853 | 6    | 504  | 1181 | 2534 | 1    | 496  |
| cb2737_c63/f1p2/2799    | gnl BL_ORD_ID 68786      cb2737_c50/f1p0/3706<br>isoform=cb2737_c63;full_length_coverage=1;non_full_length_coverage=2;isoform_length=2799;expected_accuracy=0.994       | 109 | 1514 | 1512 | 2799 | 675  | 2082 | 2214 | 3504 |

|                                                                                                                                                |                                                                                                                                                                         |     |      |      |      |      |      |      |      |
|------------------------------------------------------------------------------------------------------------------------------------------------|-------------------------------------------------------------------------------------------------------------------------------------------------------------------------|-----|------|------|------|------|------|------|------|
| cb8564_c48538/f1p0/2599                                                                                                                        | gnl BL_ORD_ID 14026      cb8564_c43137/f1p0/2726<br>isoform=cb8564_c43137;full_length_coverage=1;non_full_length_coverage=0;isoform_length=2726;expected_accuracy=0.996 | 553 | 2462 | 81   | 558  | 807  | 2715 | 160  | 637  |
| cb8757_c7/f1p1/1789                                                                                                                            | gnl BL_ORD_ID 17194      cb8757_c2/f1p1/2156<br>isoform=cb8757_c2;full_length_coverage=1;non_full_length_coverage=1;isoform_length=2156;expected_accuracy=0.993         | 221 | 1756 | 6    | 223  | 623  | 2155 | 3    | 220  |
| cb2304_c1/f2p0/2952<br>isoform=cb2304_c1;full_length_coverage=2;non_full_length_coverage=0;isoform_length=2952;expected_accuracy=0.997         | gnl BL_ORD_ID 68424      cb2304_c9/f1p0/6807                                                                                                                            | 99  | 2914 | 1    | 101  | 4069 | 6892 | 3362 | 3462 |
| cb12939_c8/f1p0/1310<br>isoform=cb12939_c8;full_length_coverage=1;non_full_length_coverage=0;isoform_length=1310;expected_accuracy=0.993       | gnl BL_ORD_ID 61984      cb12939_c13/f1p0/6119                                                                                                                          | 109 | 1283 | 1    | 110  | 4551 | 5722 | 5    | 116  |
| cb584_c19/f1p0/3377<br>isoform=cb584_c19;full_length_coverage=1;non_full_length_coverage=0;isoform_length=3377;expected_accuracy=0.995         | gnl BL_ORD_ID 46932      cb584_c20/f1p0/4710<br>isoform=cb584_c20;full_length_coverage=1;non_full_length_coverage=0;isoform_length=4710;expected_accuracy=0.995         | 629 | 3377 | 66   | 631  | 1035 | 3772 | 1    | 568  |
| cb8564_c43779/f1p0/3021<br>isoform=cb8564_c43779;full_length_coverage=1;non_full_length_coverage=0;isoform_length=3021;expected_accuracy=0.993 | gnl BL_ORD_ID 16886      cb8564_c50727/f1p0/3201<br>isoform=cb8564_c50727;full_length_coverage=1;non_full_length_coverage=0;isoform_length=3201;expected_accuracy=0.999 | 1   | 2344 | 2345 | 3021 | 3    | 2370 | 2526 | 3201 |
| cb6063_c4/f2p0/2706<br>isoform=cb6063_c4;full_length_coverage=2;non_full_length_coverage=0;isoform_length=2706;expected_accuracy=0.993         | gnl BL_ORD_ID 45456      cb6063_c27/f3p0/2968<br>isoform=cb6063_c27;full_length_coverage=3;non_full_length_coverage=0;isoform_length=2968;expected_accuracy=0.993       | 238 | 2681 | 1    | 239  | 518  | 2965 | 1    | 237  |

|                                                             |                                                                                                                                                                          |      |      |      |      |      |          |      |          |  |
|-------------------------------------------------------------|--------------------------------------------------------------------------------------------------------------------------------------------------------------------------|------|------|------|------|------|----------|------|----------|--|
| ngth_coverage=0;isoform_length=2706;expected_accuracy=0.999 | ength_coverage=0;isoform_length=2968;expected_accuracy=1.000                                                                                                             |      |      |      |      |      |          |      |          |  |
| cb8564_c5122/f1p0/3329                                      | gnl BL_ORD_ID 15704      cb8564_c5094/f3p0/3851<br>isoform=cb8564_c5094;full_length_coverage=3;non_full_length_coverage=0;isoform_length=3851;expected_accuracy=1.000    | 1067 | 3334 | 1    | 1069 | 1449 | 371<br>6 | 89   | 1157     |  |
| cb581_c2/f2p1/2578                                          | gnl BL_ORD_ID 45252      cb581_c3/f1p1/4740<br>isoform=cb581_c2;full_length_coverage=2;non_full_length_coverage=1;isoform_length=2578;expected_accuracy=0.998            | 1014 | 2578 | 1    | 1016 | 3107 | 467<br>1 | 192  | 122<br>7 |  |
| cb5909_c2/f3p0/1152                                         | gnl BL_ORD_ID 74631      cb5909_c6/f1p1/3343<br>isoform=cb5909_c2;full_length_coverage=3;non_full_length_coverage=0;isoform_length=1152;expected_accuracy=0.997          | 532  | 1141 | 6    | 536  | 2511 | 312<br>0 | 1    | 530      |  |
| cb396_c48/f1p0/2172                                         | gnl BL_ORD_ID 40201      cb396_c30/f1p0/2423<br>isoform=cb396_c30;full_length_coverage=1;non_full_length_coverage=0;isoform_length=2423;expected_accuracy=0.996          | 238  | 2104 | 40   | 238  | 458  | 232<br>5 | 3    | 208      |  |
| cb8564_c49562/f1p0/2838                                     | gnl BL_ORD_ID 12938      cb8564_c181163/f1p1/2936<br>isoform=cb8564_c49562;full_length_coverage=1;non_full_length_coverage=0;isoform_length=2838;expected_accuracy=0.995 | 1    | 2331 | 2327 | 2838 | 1    | 232<br>1 | 2427 | 293<br>3 |  |
| cb5281_c9/f1p0/3211                                         | gnl BL_ORD_ID 73727      cb5281_c5/f1p0/3493<br>isoform=cb5281_c9;full_length_coverage=1;non_full_length_coverage=0;isoform_length=3211;expected_accuracy=0.995          | 1309 | 3211 | 1    | 1313 | 1471 | 337<br>5 | 1    | 130<br>2 |  |



|                                                                                                                                                |                                                                                                                                                                    |      |      |      |      |      |          |      |          |
|------------------------------------------------------------------------------------------------------------------------------------------------|--------------------------------------------------------------------------------------------------------------------------------------------------------------------|------|------|------|------|------|----------|------|----------|
| cb5487_c5/f1p0/2472                                                                                                                            | gnl BL_ORD_ID 73975 cb5487_c11/f1p0/2702                                                                                                                           | 1    | 1481 | 1481 | 2482 | 4    | 147<br>7 | 1646 | 267<br>1 |
| cb8564_c52804/f1p5/3221<br>isoform=cb8564_c52804;full_length_coverage=1;non_full_length_coverage=5;isoform_length=3221;expected_accuracy=0.999 | gnl BL_ORD_ID 55939 cb8564_c49630/f1p4/3487                                                                                                                        | 2    | 2914 | 2914 | 3164 | 1    | 291<br>3 | 3243 | 349<br>2 |
| cb8564_c46939/f1p1/2926                                                                                                                        | gnl BL_ORD_ID 16681 cb8564_c54233/f1p1/3194<br>isoform=cb8564_c54233;full_length_coverage=1;non_full_length_coverage=1;isoform_length=3194;expected_accuracy=0.995 | 2    | 2134 | 2130 | 2870 | 8    | 216<br>6 | 2271 | 301<br>2 |
| cb2055_c16/f1p0/2452                                                                                                                           | gnl BL_ORD_ID 35222 cb2055_c22/f1p0/3295<br>isoform=cb2055_c22;full_length_coverage=1;non_full_length_coverage=0;isoform_length=3295;expected_accuracy=0.994       | 1    | 1898 | 1896 | 2406 | 145  | 203<br>4 | 2784 | 329<br>5 |
| cb396_c18/f1p0/2281<br>isoform=cb396_c18;full_length_coverage=1;non_full_length_coverage=0;isoform_length=2281;expected_accuracy=0.999         | gnl BL_ORD_ID 70865 cb396_c49/f1p0/3077                                                                                                                            | 249  | 2265 | 84   | 251  | 521  | 253<br>5 | 21   | 190      |
| cb2875_c0/f7p0/3313<br>isoform=cb2875_c0;full_length_coverage=7;non_full_length_coverage=0;isoform_length=3313;expected_accuracy=0.997         | gnl BL_ORD_ID 70060 cb2875_c14/f1p1/3543                                                                                                                           | 1592 | 3298 | 1    | 1591 | 1816 | 352<br>3 | 1    | 158<br>7 |
| cb8564_c45300/f1p4/3014<br>isoform=cb8564_c45300;full_length_coverage=1;non_full_length_coverage=4;isoform_length=3014;expected_accuracy=0.996 | gnl BL_ORD_ID 16447 cb8564_c47202/f1p0/3195<br>isoform=cb8564_c47202;full_length_coverage=1;non_full_length_coverage=0;isoform_length=3195;expected_accuracy=0.996 | 243  | 3013 | 1    | 246  | 400  | 319<br>5 | 1    | 243      |

|                                                                                                                                                |                                                                                                                                                                    |     |      |      |      |      |      |      |      |
|------------------------------------------------------------------------------------------------------------------------------------------------|--------------------------------------------------------------------------------------------------------------------------------------------------------------------|-----|------|------|------|------|------|------|------|
| cb12302_c31/f1p0/1548<br>isoform=cb12302_c31;full_length_coverage=1;non_full_length_coverage=0;isoform_length=1548;expected_accuracy=1.000     | gnl BL_ORD_ID 61307 cb1380_c29/f1p2/1918                                                                                                                           | 324 | 1548 | 8    | 329  | 579  | 1803 | 14   | 335  |
| cb8564_c45300/f1p4/3014<br>isoform=cb8564_c45300;full_length_coverage=1;non_full_length_coverage=4;isoform_length=3014;expected_accuracy=0.996 | gnl BL_ORD_ID 15924 cb8564_c52804/f1p5/3221<br>isoform=cb8564_c52804;full_length_coverage=1;non_full_length_coverage=5;isoform_length=3221;expected_accuracy=0.999 | 243 | 3014 | 1    | 246  | 398  | 3173 | 1    | 241  |
| cb13355_c8/f1p0/1342<br>isoform=cb13355_c8;full_length_coverage=1;non_full_length_coverage=0;isoform_length=1342;expected_accuracy=0.998       | gnl BL_ORD_ID 25368 cb13355_c6/f5p0/1516<br>isoform=cb13355_c6;full_length_coverage=5;non_full_length_coverage=0;isoform_length=1516;expected_accuracy=1.000       | 1   | 1017 | 1016 | 1342 | 11   | 1021 | 1134 | 1460 |
| cb395_c4/f1p0/3249                                                                                                                             | gnl BL_ORD_ID 40013 cb395_c2/f1p0/3218<br>isoform=cb395_c2;full_length_coverage=1;non_full_length_coverage=0;isoform_length=3218;expected_accuracy=0.992           | 15  | 2595 | 2598 | 3082 | 1    | 2563 | 2738 | 3218 |
| cb8564_c36731/f1p2/2761                                                                                                                        | gnl BL_ORD_ID 16886 cb8564_c50727/f1p0/3201<br>isoform=cb8564_c50727;full_length_coverage=1;non_full_length_coverage=0;isoform_length=3201;expected_accuracy=0.999 | 1   | 1977 | 1972 | 2738 | 3    | 1982 | 2434 | 3201 |
| cb3427_c11/f1p1/1420<br>isoform=cb3427_c11;full_length_coverage=1;non_full_length_coverage=1;isoform_length=1420;expected_accuracy=1.000       | gnl BL_ORD_ID 39944 cb3427_c5/f1p0/3487<br>isoform=cb3427_c5;full_length_coverage=1;non_full_length_coverage=0;isoform_length=3487;expected_accuracy=0.997         | 478 | 1375 | 8    | 483  | 2590 | 3487 | 1    | 465  |
| cb8564_c110147/f1p0/3399<br>isoform=cb8564_c110147;full_length_coverage=1;non_                                                                 | gnl BL_ORD_ID 54608 cb8564_c127899/f1p0/3880                                                                                                                       | 1   | 2834 | 2832 | 3347 | 221  | 3075 | 3305 | 3820 |

|                                                                                                                     |                                                                                                                   |     |      |      |      |      |      |      |     |   |
|---------------------------------------------------------------------------------------------------------------------|-------------------------------------------------------------------------------------------------------------------|-----|------|------|------|------|------|------|-----|---|
| full_length_coverage=0;isoform_length=3399;expected_accuracy=0.999                                                  |                                                                                                                   |     |      |      |      |      |      |      |     |   |
| cb12934_c0/f2p0/1538                                                                                                |                                                                                                                   |     |      |      |      |      |      |      |     |   |
| isoform=cb12934_c0;full_length_coverage=2;non_full_length_coverage=0;isoform_length=1538;expected_accuracy=1.000    | gnl BL_ORD_ID 64566 cb15252_c15/f1p0/2529                                                                         | 1   | 1201 | 1199 | 1512 | 1    | 1187 | 2147 | 246 | 3 |
| cb4233_c169/f1p0/2382                                                                                               | gnl BL_ORD_ID 71865 cb4233_c138/f1p0/3035                                                                         | 119 | 1697 | 1692 | 2378 | 7    | 158  | 2306 | 299 | 3 |
| cb8564_c36056/f1p0/2652                                                                                             |                                                                                                                   |     |      |      |      |      |      |      |     |   |
| isoform=cb8564_c36056;full_length_coverage=1;non_full_length_coverage=0;isoform_length=2652;expected_accuracy=0.999 | gnl BL_ORD_ID 55962 cb8564_c50282/f1p0/4402                                                                       | 248 | 2651 | 1    | 251  | 1906 | 431  | 1512 | 176 | 2 |
| cb1928_c2/f3p3/3017                                                                                                 |                                                                                                                   |     |      |      |      |      |      |      |     |   |
| isoform=cb1928_c2;full_length_coverage=3;non_full_length_coverage=3;isoform_length=3017;expected_accuracy=0.998     | gnl BL_ORD_ID 66501 cb1928_c9/f1p0/3652                                                                           | 193 | 3017 | 1    | 195  | 359  | 318  | 3    | 200 |   |
| cb8564_c43074/f1p0/3464                                                                                             | gnl BL_ORD_ID 56041 cb8564_c53077/f1p2/3406                                                                       | 357 | 3198 | 37   | 357  | 452  | 329  | 25   | 337 |   |
| cb2804_c108/f1p0/3215                                                                                               | gnl BL_ORD_ID 37800 cb2804_c106/f1p0/3501                                                                         |     |      |      |      |      |      |      |     |   |
| isoform=cb2804_c108;full_length_coverage=1;non_full_length_coverage=0;isoform_length=3215;expected_accuracy=0.999   | isoform=cb2804_c106;full_length_coverage=1;non_full_length_coverage=0;isoform_length=3501;expected_accuracy=0.996 | 1   | 1879 | 1876 | 3215 | 3    | 188  | 2062 | 339 | 6 |
| cb1203_c25/f1p0/1362                                                                                                | gnl BL_ORD_ID 22718 cb1203_c2/f1p2/4432                                                                           |     |      |      |      |      |      |      |     |   |
|                                                                                                                     | isoform=cb1203_c2;full_length_coverage=1;non_full_length_coverage=2;isoform_length=4432;expected_accuracy=0.997   | 157 | 1269 | 4    | 157  | 3204 | 431  | 2222 | 237 | 5 |

|                                                                                                                                          |                                                                                                                                                               |      |      |      |      |      |     |      |     |
|------------------------------------------------------------------------------------------------------------------------------------------|---------------------------------------------------------------------------------------------------------------------------------------------------------------|------|------|------|------|------|-----|------|-----|
| cb8564_c38035/f1p0/2770                                                                                                                  | gnl BL_ORD_ID 54698 cb8564_c155298/f3p9/3822                                                                                                                  | 1    | 2035 | 2033 | 2756 | 1    | 203 | 2228 | 295 |
|                                                                                                                                          |                                                                                                                                                               |      |      |      |      |      | 8   |      | 2   |
| cb4563_c33/f1p0/2825                                                                                                                     | gnl BL_ORD_ID 72683 cb4563_c12/f1p0/3843                                                                                                                      | 229  | 2605 | 2    | 225  | 1426 | 379 | 636  | 860 |
|                                                                                                                                          |                                                                                                                                                               |      |      |      |      |      | 1   |      |     |
| cb567_c14/f1p0/3377                                                                                                                      | gnl BL_ORD_ID 45926 cb567_c4/f1p0/3256<br>isoform=cb567_c4;full_length_coverage=1;non_full_length_coverage=0;isoform_length=3256;expected_accuracy=0.996      | 1    | 2644 | 2642 | 3073 | 54   | 268 | 2829 | 325 |
|                                                                                                                                          |                                                                                                                                                               |      |      |      |      |      | 9   |      | 6   |
| cb2640_c18/f1p0/3205<br>isoform=cb2640_c18;full_length_coverage=1;non_full_length_coverage=0;isoform_length=3205;expected_accuracy=0.991 | gnl BL_ORD_ID 69859 cb2640_c29/f1p0/3441                                                                                                                      | 188  | 3094 | 1    | 189  | 355  | 324 | 40   | 228 |
|                                                                                                                                          |                                                                                                                                                               |      |      |      |      |      | 9   |      |     |
| cb8564_c74180/f1p1/2858                                                                                                                  | gnl BL_ORD_ID 42781 cb4681_c0/f1p1/3285<br>isoform=cb4681_c0;full_length_coverage=1;non_full_length_coverage=1;isoform_length=3285;expected_accuracy=0.995    | 1    | 2587 | 2585 | 2854 | 3161 | 575 | 436  | 167 |
|                                                                                                                                          |                                                                                                                                                               |      |      |      |      |      |     |      |     |
| cb14859_c10/f1p0/5042                                                                                                                    | gnl BL_ORD_ID 30140 cb14859_c6/f1p4/5345<br>isoform=cb14859_c6;full_length_coverage=1;non_full_length_coverage=4;isoform_length=5345;expected_accuracy=0.999  | 1404 | 4825 | 1    | 1407 | 1837 | 526 | 1    | 140 |
|                                                                                                                                          |                                                                                                                                                               |      |      |      |      |      | 1   |      | 9   |
| cb6691_c13/f1p0/2308                                                                                                                     | gnl BL_ORD_ID 5097 cb6691_c22/f13p0/2328<br>isoform=cb6691_c22;full_length_coverage=13;non_full_length_coverage=0;isoform_length=2328;expected_accuracy=1.000 | 1010 | 2135 | 1    | 1010 | 1192 | 231 | 83   | 109 |
|                                                                                                                                          |                                                                                                                                                               |      |      |      |      |      | 7   |      | 2   |
| cb8288_c8/f1p0/1153                                                                                                                      | gnl BL_ORD_ID 9352 cb8288_c2/f2p0/2253<br>isoform=cb8288_c2;full_length_coverage=2;non_full_length_coverage=0;isoform_length=2253;expected_accuracy=0.999     | 170  | 1071 | 2    | 171  | 1344 | 224 | 11   | 181 |
|                                                                                                                                          |                                                                                                                                                               |      |      |      |      |      | 5   |      |     |

|                                                                                                                                                |                                                                                                                                                                      |      |      |      |      |      |      |      |      |  |
|------------------------------------------------------------------------------------------------------------------------------------------------|----------------------------------------------------------------------------------------------------------------------------------------------------------------------|------|------|------|------|------|------|------|------|--|
|                                                                                                                                                | ngth_coverage=0;isoform_length=2253;expected_accuracy=1.000                                                                                                          |      |      |      |      |      |      |      |      |  |
| cb12714_c29/f1p2/1583                                                                                                                          | gnl BL_ORD_ID 55603 cb8564_c46500/f1p1/2752                                                                                                                          | 1    | 1296 | 1293 | 1596 | 2    | 1294 | 2358 | 2661 |  |
| cb8564_c21439/f1p0/2587                                                                                                                        | gnl BL_ORD_ID 19105 cb8564_c98209/f1p10/2805<br>isoform=cb8564_c98209;full_length_coverage=1;non_full_length_coverage=10;isoform_length=2805;expected_accuracy=1.000 | 1226 | 2572 | 1    | 1228 | 1351 | 2697 | 3    | 1230 |  |
| cb8564_c5239/f2p0/2655<br>isoform=cb8564_c5239;full_length_coverage=2;non_full_length_coverage=0;isoform_length=2655;expected_accuracy=0.996   | gnl BL_ORD_ID 16140 cb8564_c5238/f1p0/2896<br>isoform=cb8564_c5238;full_length_coverage=1;non_full_length_coverage=0;isoform_length=2896;expected_accuracy=0.996     | 1    | 2253 | 2250 | 2654 | 13   | 2248 | 2490 | 2896 |  |
| cb7214_c2/f1p0/2219<br>isoform=cb7214_c2;full_length_coverage=1;non_full_length_coverage=0;isoform_length=2219;expected_accuracy=0.992         | gnl BL_ORD_ID 7790 cb7214_c1/f1p0/2667<br>isoform=cb7214_c1;full_length_coverage=1;non_full_length_coverage=0;isoform_length=2667;expected_accuracy=0.997            | 1    | 1470 | 1468 | 2217 | 2    | 1479 | 1909 | 2663 |  |
| cb1822_c3/f1p1/3787<br>isoform=cb1822_c3;full_length_coverage=1;non_full_length_coverage=1;isoform_length=3787;expected_accuracy=0.998         | gnl BL_ORD_ID 36294 cb18848_c0/f1p0/5897<br>isoform=cb18848_c0;full_length_coverage=1;non_full_length_coverage=0;isoform_length=5897;expected_accuracy=0.996         | 1    | 3205 | 3206 | 3711 | 2017 | 5227 | 5393 | 5897 |  |
| cb8564_c40764/f1p0/2563<br>isoform=cb8564_c40764;full_length_coverage=1;non_full_length_coverage=0;isoform_length=2563;expected_accuracy=0.997 | gnl BL_ORD_ID 55291 cb8564_c37409/f1p0/3153                                                                                                                          | 1    | 2167 | 2162 | 2563 | 1    | 2159 | 2366 | 2766 |  |
| cb8564_c42506/f1p0/2909                                                                                                                        | gnl BL_ORD_ID 14992 cb8564_c45033/f1p5/3781<br>isoform=cb8564_c45033;full_length_coverage=1;non_full_length_coverage=0;isoform_length=3781;expected_accuracy=0.996   | 1    | 2203 | 2199 | 2850 | 1057 | 3258 | 3128 | 3781 |  |

|                     |                                                                                                                                                                                                                                                     |      |      |      |      |      |      |      |      |
|---------------------|-----------------------------------------------------------------------------------------------------------------------------------------------------------------------------------------------------------------------------------------------------|------|------|------|------|------|------|------|------|
| cb4744_c3/f1p0/2848 | ll_length_coverage=5;isoform_length=3781;expected_accuracy=1.000<br>gnl BL_ORD_ID 44018                      cb4744_c0/f2p0/2942<br>isoform=cb4744_c0;full_length_coverage=2;non_full_length_coverage=0;isoform_length=2942;expected_accuracy=0.997 | 1    | 2456 | 2452 | 2829 | 8    | 2454 | 2565 | 2942 |
| cb1253_c8/f1p0/3618 | gnl BL_ORD_ID 23170                      cb1253_c2/f2p0/3323<br>isoform=cb1253_c2;full_length_coverage=2;non_full_length_coverage=0;isoform_length=3323;expected_accuracy=0.999                                                                     | 197  | 3164 | 101  | 199  | 313  | 3278 | 3    | 99   |
| cb944_c34/f1p0/3024 | gnl BL_ORD_ID 19525                      cb944_c27/f2p0/3667<br>isoform=cb944_c34;full_length_coverage=1;non_full_length_coverage=0;isoform_length=3024;expected_accuracy=0.995                                                                     | 1449 | 3024 | 1    | 1451 | 2068 | 3656 | 1    | 1465 |
| cb4342_c4/f1p0/2299 | gnl BL_ORD_ID 43927                      cb4342_c1/f2p0/3323<br>isoform=cb4342_c4;full_length_coverage=1;non_full_length_coverage=0;isoform_length=2299;expected_accuracy=1.000                                                                     | 1    | 1739 | 1737 | 2299 | 12   | 1758 | 2561 | 3115 |
| cb8645_c5/f1p0/1752 | gnl BL_ORD_ID 18589                      cb8645_c4/f1p0/2467<br>isoform=cb8645_c5;full_length_coverage=1;non_full_length_coverage=0;isoform_length=1752;expected_accuracy=0.997                                                                     | 486  | 1752 | 82   | 488  | 1099 | 2365 | 3    | 410  |
| cb1467_c0/f2p0/4330 | gnl BL_ORD_ID 30647                      cb1467_c6/f1p0/5175<br>isoform=cb1467_c0;full_length_coverage=2;non_full_length_coverage=0;isoform_length=4330;expected_accuracy=0.994                                                                     | 382  | 4330 | 1    | 384  | 1187 | 5156 | 127  | 512  |

|                                                                                                                                          |                                                                                                                                                                                    |     |      |      |      |      |      |      |      |
|------------------------------------------------------------------------------------------------------------------------------------------|------------------------------------------------------------------------------------------------------------------------------------------------------------------------------------|-----|------|------|------|------|------|------|------|
| cb9718_c43/f1p0/1655<br>isoform=cb9718_c43;full_length_coverage=1;non_full_length_coverage=0;isoform_length=1655;expected_accuracy=0.996 | gnl BL_ORD_ID 59925 cb9718_c13/f1p0/1961                                                                                                                                           | 288 | 1655 | 3    | 290  | 391  | 1758 | 4    | 291  |
| cb5345_c7/f1p0/1521<br>isoform=cb5345_c7;full_length_coverage=1;non_full_length_coverage=0;isoform_length=1521;expected_accuracy=0.998   | gnl BL_ORD_ID 73806 cb5345_c0/f1p1/3127                                                                                                                                            | 1   | 1141 | 1141 | 1521 | 28   | 1168 | 2440 | 2820 |
| cb4761_c1/f8p0/2802<br>isoform=cb4761_c1;full_length_coverage=8;non_full_length_coverage=0;isoform_length=2802;expected_accuracy=0.999   | gnl BL_ORD_ID 43068                      cb4761_c2/f1p0/3263<br>isoform=cb4761_c2;full_length_coverage=1;non_full_length_coverage=0;isoform_length=3263;expected_accuracy=0.996    | 285 | 2793 | 41   | 285  | 756  | 3263 | 1    | 245  |
| cb8564_c37361/f1p0/3076                                                                                                                  | gnl BL_ORD_ID 55243 cb8564_c36242/f1p0/3335                                                                                                                                        | 1   | 2481 | 2477 | 3069 | 1    | 2484 | 2585 | 3176 |
| cb8564_c45609/f1p0/3991                                                                                                                  | gnl BL_ORD_ID 56019 cb8564_c52510/f6p2/4563                                                                                                                                        | 260 | 3797 | 1    | 260  | 489  | 4040 | 41   | 300  |
| cb9467_c4/f9p0/2081<br>isoform=cb9467_c4;full_length_coverage=9;non_full_length_coverage=0;isoform_length=2081;expected_accuracy=0.999   | gnl BL_ORD_ID 21565                      cb9467_c22/f1p0/2220<br>isoform=cb9467_c22;full_length_coverage=1;non_full_length_coverage=0;isoform_length=2220;expected_accuracy=0.995  | 163 | 2067 | 1    | 162  | 281  | 2179 | 1    | 161  |
| cb10088_c26/f1p0/1030                                                                                                                    | gnl BL_ORD_ID 2975                      cb10088_c25/f1p3/1453<br>isoform=cb10088_c25;full_length_coverage=1;non_full_length_coverage=3;isoform_length=1453;expected_accuracy=1.000 | 476 | 1034 | 7    | 479  | 716  | 1274 | 1    | 473  |
| cb10486_c1/f13p1/1234<br>isoform=cb10486_c1;full_length_coverage=13;non_full                                                             | gnl BL_ORD_ID 1068                      cb10486_c2/f1p0/2550<br>isoform=cb10486_c2;full_length_coverage=1;non_full_l                                                               | 525 | 1234 | 6    | 526  | 1841 | 2550 | 3    | 523  |

|                                                                |                                                                                                                                                                         |     |      |      |      |      |          |      |          |  |  |  |
|----------------------------------------------------------------|-------------------------------------------------------------------------------------------------------------------------------------------------------------------------|-----|------|------|------|------|----------|------|----------|--|--|--|
| _length_coverage=1;isoform_length=1234;expected_accuracy=1.000 | ength_coverage=0;isoform_length=2550;expected_accuracy=0.997                                                                                                            |     |      |      |      |      |          |      |          |  |  |  |
| cb8564_c36731/f1p2/2761                                        | gnl BL_ORD_ID 14471      cb8564_c34518/f1p0/3136<br>isoform=cb8564_c34518;full_length_coverage=1;non_full_length_coverage=0;isoform_length=3136;expected_accuracy=0.991 | 1   | 1977 | 1972 | 2738 | 1    | 195<br>2 | 2376 | 313<br>6 |  |  |  |
| cb1913_c44/f1p0/2236                                           | gnl BL_ORD_ID 35835      cb1913_c34/f1p1/2444<br>isoform=cb1913_c44;full_length_coverage=1;non_full_length_coverage=0;isoform_length=2236;expected_accuracy=0.998       | 1   | 1634 | 1630 | 2234 | 42   | 169<br>2 | 1817 | 243<br>1 |  |  |  |
| cb5425_c29/f1p0/1623                                           | gnl BL_ORD_ID 45676      cb5425_c6/f4p0/1999<br>isoform=cb5425_c6;full_length_coverage=4;non_full_length_coverage=0;isoform_length=1999;expected_accuracy=1.000         | 1   | 1218 | 1216 | 1628 | 5    | 123<br>1 | 1558 | 197<br>0 |  |  |  |
| cb2737_c64/f1p1/2838                                           | gnl BL_ORD_ID 36735      cb2737_c13/f1p0/3105<br>isoform=cb2737_c64;full_length_coverage=1;non_full_length_coverage=1;isoform_length=2838;expected_accuracy=0.993       | 1   | 1537 | 1535 | 2838 | 154  | 167<br>6 | 1808 | 310<br>3 |  |  |  |
| cb6391_c14/f1p1/2258                                           | gnl BL_ORD_ID 3495      cb6391_c11/f1p0/2658<br>isoform=cb6391_c14;full_length_coverage=1;non_full_length_coverage=1;isoform_length=2258;expected_accuracy=0.994        | 197 | 2258 | 1    | 199  | 520  | 257<br>8 | 49   | 246      |  |  |  |
| cb4848_c10/f1p0/1930                                           | gnl BL_ORD_ID 72032      cb4848_c9/f1p1/2843<br>isoform=cb4848_c10;full_length_coverage=1;non_full_length_coverage=0;isoform_length=1930;expected_accuracy=0.993        | 138 | 1930 | 1    | 137  | 1010 | 280<br>1 | 304  | 442      |  |  |  |



|                         |                                                                                                                                                                         |      |      |      |      |      |      |      |      |
|-------------------------|-------------------------------------------------------------------------------------------------------------------------------------------------------------------------|------|------|------|------|------|------|------|------|
| cb8564_c45873/f1p2/2968 | gnl BL_ORD_ID 9350      cb8564_c11826/f1p0/2916<br>isoform=cb8564_c11826;full_length_coverage=1;non_full_length_coverage=0;isoform_length=2916;expected_accuracy=0.997  | 1293 | 2665 | 1    | 1294 | 1543 | 2916 | 4    | 1296 |
| cb11024_c1/f1p0/1252    | gnl BL_ORD_ID 49094      cb11024_c2/f1p0/2609                                                                                                                           | 431  | 1251 | 8    | 433  | 1811 | 2631 | 6    | 431  |
| cb6258_c22/f1p0/2295    | gnl BL_ORD_ID 6049      cb6258_c8/f2p1/2472<br>isoform=cb6258_c22;full_length_coverage=1;non_full_length_coverage=0;isoform_length=2295;expected_accuracy=0.997         | 449  | 2295 | 53   | 451  | 535  | 2382 | 1    | 399  |
| cb7635_c12/f1p0/1743    | gnl BL_ORD_ID 7418      cb7635_c1/f5p2/2333<br>isoform=cb7635_c12;full_length_coverage=1;non_full_length_coverage=0;isoform_length=1743;expected_accuracy=0.995         | 1    | 1347 | 1344 | 1743 | 1    | 1335 | 1868 | 2272 |
| cb14663_c3/f1p0/1061    | gnl BL_ORD_ID 902      cb10034_c28/f1p5/2081<br>isoform=cb14663_c3;full_length_coverage=1;non_full_length_coverage=0;isoform_length=1061;expected_accuracy=0.998        | 6    | 599  | 599  | 1039 | 1557 | 966  | 464  | 23   |
| cb8564_c23436/f1p0/3497 | gnl BL_ORD_ID 11711      cb8564_c14355/f1p0/3726<br>isoform=cb8564_c23436;full_length_coverage=1;non_full_length_coverage=0;isoform_length=3497;expected_accuracy=0.994 | 179  | 3497 | 1    | 182  | 397  | 3715 | 1    | 182  |
| cb8564_c4904/f1p0/3104  | gnl BL_ORD_ID 55701      cb8564_c4898/f1p0/3489<br>isoform=cb8564_c4904;full_length_coverage=1;non_full_length_coverage=0;isoform_length=3104;expected_accuracy=0.998   | 237  | 3082 | 1    | 236  | 454  | 3303 | 31   | 266  |

|                                                                                                                                                  |                                                                                                                                                                           |      |      |      |      |      |      |      |      |
|--------------------------------------------------------------------------------------------------------------------------------------------------|---------------------------------------------------------------------------------------------------------------------------------------------------------------------------|------|------|------|------|------|------|------|------|
| cb2533_c30/f1p0/3420<br>isoform=cb2533_c30;full_length_coverage=1;non_full_length_coverage=0;isoform_length=3420;expected_accuracy=0.996         | gnl BL_ORD_ID 69802 cb2533_c17/f1p0/3689                                                                                                                                  | 17   | 2837 | 2834 | 3420 | 16   | 2834 | 3018 | 3605 |
| cb8564_c90621/f1p2/3030<br>isoform=cb8564_c90621;full_length_coverage=1;non_full_length_coverage=2;isoform_length=3030;expected_accuracy=0.994   | gnl BL_ORD_ID 57409 cb8564_c92262/f1p0/3503                                                                                                                               | 206  | 3030 | 1    | 205  | 459  | 3282 | 121  | 325  |
| cb8564_c49562/f1p0/2838<br>isoform=cb8564_c49562;full_length_coverage=1;non_full_length_coverage=0;isoform_length=2838;expected_accuracy=0.995   | gnl BL_ORD_ID 15994      cb8564_c54019/f1p1/2940<br>isoform=cb8564_c54019;full_length_coverage=1;non_full_length_coverage=1;isoform_length=2940;expected_accuracy=0.991   | 1    | 2331 | 2327 | 2836 | 3    | 2320 | 2425 | 2932 |
| cb5564_c21/f1p0/1889                                                                                                                             | gnl BL_ORD_ID 74068 cb5564_c17/f1p0/2403                                                                                                                                  | 355  | 1844 | 5    | 359  | 816  | 2306 | 219  | 577  |
| cb5896_c25/f1p1/3090<br>isoform=cb5896_c25;full_length_coverage=1;non_full_length_coverage=1;isoform_length=3090;expected_accuracy=1.000         | gnl BL_ORD_ID 74558 cb5896_c23/f1p0/4184                                                                                                                                  | 114  | 1791 | 1792 | 3090 | 1    | 1678 | 2860 | 4157 |
| cb8564_c108739/f1p0/2789<br>isoform=cb8564_c108739;full_length_coverage=7;non_full_length_coverage=0;isoform_length=2789;expected_accuracy=1.000 | gnl BL_ORD_ID 11086      cb8564_c118096/f1p0/2820<br>isoform=cb8564_c118096;full_length_coverage=1;non_full_length_coverage=0;isoform_length=2820;expected_accuracy=0.991 | 1    | 1546 | 1543 | 2720 | 7    | 1544 | 1653 | 2820 |
| cb6490_c6/f1p0/2575                                                                                                                              | gnl BL_ORD_ID 49764 cb6490_c1/f1p0/2838                                                                                                                                   | 1    | 1469 | 1468 | 2465 | 2    | 1463 | 1840 | 2837 |
| cb8564_c123436/f1p0/3559                                                                                                                         | gnl BL_ORD_ID 10971      cb8564_c115642/f1p0/3794<br>isoform=cb8564_c115642;full_length_coverage=1;non_f                                                                  | 1011 | 3262 | 1    | 1012 | 1550 | 3794 | 42   | 1048 |



|                                                                                                                                                |                                                                                                                                                                         |     |      |      |      |      |      |      |      |
|------------------------------------------------------------------------------------------------------------------------------------------------|-------------------------------------------------------------------------------------------------------------------------------------------------------------------------|-----|------|------|------|------|------|------|------|
| cb816_c20/f5p2/2306<br>isoform=cb816_c20;full_length_coverage=5;non_full_length_coverage=2;isoform_length=2306;expected_accuracy=1.000         | gnl BL_ORD_ID 49480 cb816_c12/f1p0/3158                                                                                                                                 | 1   | 1340 | 1340 | 2228 | 1    | 1335 | 2121 | 3006 |
| cb8564_c84198/f1p0/2418                                                                                                                        | gnl BL_ORD_ID 17748      cb8564_c89509/f1p4/2644<br>isoform=cb8564_c89509;full_length_coverage=1;non_full_length_coverage=4;isoform_length=2644;expected_accuracy=1.000 | 1   | 2008 | 2006 | 2428 | 12   | 2034 | 2151 | 2573 |
| cb341_c10/f1p0/3009                                                                                                                            | gnl BL_ORD_ID 69575 cb341_c16/f1p0/3691                                                                                                                                 | 1   | 2686 | 2683 | 3015 | 10   | 2697 | 3001 | 3333 |
| cb584_c29/f1p0/4045                                                                                                                            | gnl BL_ORD_ID 45629      cb584_c18/f1p0/3716<br>isoform=cb584_c18;full_length_coverage=1;non_full_length_coverage=0;isoform_length=3716;expected_accuracy=0.996         | 227 | 3444 | 18   | 228  | 481  | 3715 | 1    | 218  |
| cb4016_c32/f1p0/1913                                                                                                                           | gnl BL_ORD_ID 71727 cb4016_c35/f1p0/2920                                                                                                                                | 191 | 1930 | 23   | 194  | 1066 | 2805 | 466  | 638  |
| cb18456_c1988/f1p0/1112                                                                                                                        | gnl BL_ORD_ID 67384 cb18456_c1991/f1p0/1481                                                                                                                             | 412 | 1017 | 8    | 416  | 716  | 1320 | 1    | 411  |
| cb8564_c74541/f1p1/3268<br>isoform=cb8564_c74541;full_length_coverage=1;non_full_length_coverage=1;isoform_length=3268;expected_accuracy=0.992 | gnl BL_ORD_ID 15223      cb8564_c35037/f1p0/3377<br>isoform=cb8564_c35037;full_length_coverage=1;non_full_length_coverage=0;isoform_length=3377;expected_accuracy=0.996 | 14  | 2774 | 2772 | 3268 | 2    | 2761 | 2866 | 3367 |
| cb2918_c65/f1p0/3088                                                                                                                           | gnl BL_ORD_ID 70088 cb2918_c33/f1p3/2817                                                                                                                                | 1   | 1818 | 1818 | 2770 | 118  | 1934 | 1755 | 2708 |
| cb8687_c5/f1p0/1932<br>isoform=cb8687_c5;full_length_coverage=1;non_full_length_coverage=0;isoform_length=1932;expected_accuracy=0.996         | gnl BL_ORD_ID 18632      cb8687_c4/f1p0/3035<br>isoform=cb8687_c4;full_length_coverage=1;non_full_length_coverage=0;isoform_length=3035;expected_accuracy=0.996         | 1   | 1322 | 1321 | 1897 | 31   | 1360 | 2459 | 3035 |

|                                                                                                                     |                                                             |     |      |      |      |     |          |      |          |  |
|---------------------------------------------------------------------------------------------------------------------|-------------------------------------------------------------|-----|------|------|------|-----|----------|------|----------|--|
| ngth_coverage=0;isoform_length=1932;expected_accuracy=1.000<br>cb8564_c45300/f1p4/3014                              | ngth_coverage=0;isoform_length=3035;expected_accuracy=0.990 |     |      |      |      |     |          |      |          |  |
| isoform=cb8564_c45300;full_length_coverage=1;non_full_length_coverage=4;isoform_length=3014;expected_accuracy=0.996 | gnl BL_ORD_ID 54425 cb8564_c42906/f1p2/3181                 | 243 | 3014 | 1    | 246  | 399 | 315<br>2 | 1    | 242      |  |
| cb8564_c84022/f1p0/2360                                                                                             | gnl BL_ORD_ID 56412 cb8564_c76337/f1p1/2735                 | 1   | 1561 | 1559 | 2334 | 2   | 156<br>3 | 1699 | 247<br>4 |  |
