# Supplementary material for: Single-molecule long-read sequencing of the full-length transcriptome of Rhododendron lapponicum L
Source: PubMed Central journal article supplement (PMC7174332; doi:10.1038/s41598-020-63814-x), 2020-04-21
Supplement: 41598_2020_63814_MOESM3_ESM.pdf [file 41598_2020_63814_MOESM3_ESM.pdf]

# Single-molecule long-read sequencing of the full-length transcriptome of *Rhododendron lapponicum* L.

Xinping Jia, Ling Tang, Xueying Mei, Huazhou Liu, Hairong Luo, Yanming Deng, Jiale Su

Institute of Leisure Agriculture, Jiangsu Academy of Agricultural Sciences, Jiangsu Key Laboratory for Horticultural Crop Genetic Improvement, Nanjing 210014, China

Table S3 Summary of lncRNAs predicted by CPC, CNCI, CPAT, and pfam protein structure domain analysis

| ID                          | cnci                        | cpat                        | cpc                         | pfam                        |
|-----------------------------|-----------------------------|-----------------------------|-----------------------------|-----------------------------|
| R01_cb8196_c10/f2p0/1238    | NA                          | NA                          | R01_cb8196_c10/f2p0/1238    | R01_cb8196_c10/f2p0/1238    |
| R01_cb10380_c2/f1p0/669     | NA                          | NA                          | NA                          | R01_cb10380_c2/f1p0/669     |
| R01_cb8564_c83711/f2p0/3575 | NA                          | R01_cb8564_c83711/f2p0/3575 | NA                          | NA                          |
| R01_cb5578_c3/f1p0/2902     | NA                          | R01_cb5578_c3/f1p0/2902     | NA                          | NA                          |
| R01_cb6691_c20/f1p0/892     | NA                          | NA                          | NA                          | R01_cb6691_c20/f1p0/892     |
| R01_cb8564_c146693/f2p0/204 | R01_cb8564_c146693/f2p0/204 | R01_cb8564_c146693/f2p0/204 | R01_cb8564_c146693/f2p0/204 | R01_cb8564_c146693/f2p0/204 |
| 6                           | 46                          | 6                           | 6                           | 6                           |
| R01_cb8564_c69331/f3p0/3241 | NA                          | R01_cb8564_c69331/f3p0/3241 | NA                          | NA                          |
| R01_cb13003_c5/f1p1/1779    | NA                          | R01_cb13003_c5/f1p1/1779    | NA                          | NA                          |
| R01_cb8564_c123957/f1p0/243 | NA                          | R01_cb8564_c123957/f1p0/243 | NA                          | NA                          |
| 2                           |                             | 2                           |                             |                             |
| R01_cb8030_c5/f1p0/2391     | NA                          | NA                          | NA                          | R01_cb8030_c5/f1p0/2391     |
| R01_cb16132_c14/f1p0/806    | NA                          | NA                          | R01_cb16132_c14/f1p0/806    | R01_cb16132_c14/f1p0/806    |
| R01_cb4370_c5/f1p0/2518     | NA                          | NA                          | NA                          | R01_cb4370_c5/f1p0/2518     |
| R01_cb9611_c5/f1p0/2100     | NA                          | R01_cb9611_c5/f1p0/2100     | NA                          | R01_cb9611_c5/f1p0/2100     |
| R01_cb18456_c6567/f1p0/933  | R01_cb18456_c6567/f1p0/933  | NA                          | NA                          | NA                          |
| R01_cb14239_c16/f1p0/1540   | NA                          | R01_cb14239_c16/f1p0/1540   | NA                          | NA                          |
| R01_cb17067_c0/f2p0/1255    | NA                          | NA                          | R01_cb17067_c0/f2p0/1255    | R01_cb17067_c0/f2p0/1255    |
| R01_cb5911_c4/f1p0/3602     | NA                          | NA                          | NA                          | R01_cb5911_c4/f1p0/3602     |
| R01_cb3088_c8/f1p0/1078     | R01_cb3088_c8/f1p0/1078     | R01_cb3088_c8/f1p0/1078     | R01_cb3088_c8/f1p0/1078     | R01_cb3088_c8/f1p0/1078     |
| R01_cb11665_c0/f1p0/911     | R01_cb11665_c0/f1p0/911     | R01_cb11665_c0/f1p0/911     | R01_cb11665_c0/f1p0/911     | R01_cb11665_c0/f1p0/911     |
| R01_cb1074_c3/f1p0/615      | R01_cb1074_c3/f1p0/615      | R01_cb1074_c3/f1p0/615      | R01_cb1074_c3/f1p0/615      | R01_cb1074_c3/f1p0/615      |
| R01_cb10391_c5/f1p0/1036    | R01_cb10391_c5/f1p0/1036    | R01_cb10391_c5/f1p0/1036    | NA                          | R01_cb10391_c5/f1p0/1036    |
| R01_cb4964_c4/f1p0/2572     | NA                          | R01_cb4964_c4/f1p0/2572     | NA                          | NA                          |

|                              |                             |                              |                             |                              |
|------------------------------|-----------------------------|------------------------------|-----------------------------|------------------------------|
| R01_cb8564_c113574/f1p0/3901 | NA                          | R01_cb8564_c113574/f1p0/3901 | NA                          | R01_cb8564_c113574/f1p0/3901 |
| R01_cb2749_c17/f1p0/1031     | R01_cb2749_c17/f1p0/1031    | R01_cb2749_c17/f1p0/1031     | R01_cb2749_c17/f1p0/1031    | R01_cb2749_c17/f1p0/1031     |
| R01_cb10832_c4/f1p0/412      | R01_cb10832_c4/f1p0/412     | R01_cb10832_c4/f1p0/412      | R01_cb10832_c4/f1p0/412     | R01_cb10832_c4/f1p0/412      |
| R01_cb15811_c30/f1p0/1139    | NA                          | R01_cb15811_c30/f1p0/1139    | R01_cb15811_c30/f1p0/1139   | R01_cb15811_c30/f1p0/1139    |
| R01_cb8564_c4589/f1p0/3384   | R01_cb8564_c4589/f1p0/3384  | R01_cb8564_c4589/f1p0/3384   | NA                          | R01_cb8564_c4589/f1p0/3384   |
| R01_cb6057_c6/f1p0/3908      | NA                          | R01_cb6057_c6/f1p0/3908      | NA                          | R01_cb6057_c6/f1p0/3908      |
| R01_cb17_c41/f1p0/1777       | NA                          | R01_cb17_c41/f1p0/1777       | NA                          | R01_cb17_c41/f1p0/1777       |
| R01_cb16038_c3/f1p0/452      | NA                          | R01_cb16038_c3/f1p0/452      | R01_cb16038_c3/f1p0/452     | R01_cb16038_c3/f1p0/452      |
| R01_cb8564_c10048/f2p0/2438  | R01_cb8564_c10048/f2p0/2438 | R01_cb8564_c10048/f2p0/2438  | R01_cb8564_c10048/f2p0/2438 | R01_cb8564_c10048/f2p0/2438  |
| R01_cb9107_c7/f1p0/2306      | R01_cb9107_c7/f1p0/2306     | R01_cb9107_c7/f1p0/2306      | NA                          | R01_cb9107_c7/f1p0/2306      |
| R01_cb8564_c10792/f1p0/3310  | NA                          | R01_cb8564_c10792/f1p0/3310  | NA                          | NA                           |
| R01_cb8564_c35088/f1p0/3430  | NA                          | R01_cb8564_c35088/f1p0/3430  | NA                          | NA                           |
| R01_cb3370_c2/f1p0/3098      | NA                          | R01_cb3370_c2/f1p0/3098      | NA                          | NA                           |
| R01_cb15053_c10/f1p0/816     | NA                          | R01_cb15053_c10/f1p0/816     | R01_cb15053_c10/f1p0/816    | NA                           |
| R01_cb10496_c8/f3p0/1467     | NA                          | NA                           | NA                          | R01_cb10496_c8/f3p0/1467     |
| R01_cb8564_c24967/f1p0/1960  | NA                          | R01_cb8564_c24967/f1p0/1960  | R01_cb8564_c24967/f1p0/1960 | R01_cb8564_c24967/f1p0/1960  |
| R01_cb8564_c88650/f1p0/2939  | R01_cb8564_c88650/f1p0/2939 | R01_cb8564_c88650/f1p0/2939  | R01_cb8564_c88650/f1p0/2939 | R01_cb8564_c88650/f1p0/2939  |
| R01_cb9936_c12/f1p0/2901     | NA                          | R01_cb9936_c12/f1p0/2901     | R01_cb9936_c12/f1p0/2901    | NA                           |
| R01_cb8564_c23942/f1p0/3454  | NA                          | NA                           | NA                          | R01_cb8564_c23942/f1p0/3454  |
| R01_cb14663_c3/f1p0/1061     | NA                          | R01_cb14663_c3/f1p0/1061     | NA                          | R01_cb14663_c3/f1p0/1061     |
| R01_cb5502_c4/f1p0/2613      | NA                          | R01_cb5502_c4/f1p0/2613      | NA                          | R01_cb5502_c4/f1p0/2613      |
| R01_cb18173_c1/f1p0/645      | R01_cb18173_c1/f1p0/645     | R01_cb18173_c1/f1p0/645      | NA                          | R01_cb18173_c1/f1p0/645      |
| R01_cb3180_c1/f1p0/3569      | NA                          | NA                           | NA                          | R01_cb3180_c1/f1p0/3569      |

|                             |                            |                             |                             |                             |
|-----------------------------|----------------------------|-----------------------------|-----------------------------|-----------------------------|
| R01_cb279_c33/f5p1/4837     | NA                         | NA                          | NA                          | R01_cb279_c33/f5p1/4837     |
| R01_cb4434_c4/f1p1/3289     | NA                         | NA                          | NA                          | R01_cb4434_c4/f1p1/3289     |
| R01_cb4657_c9/f1p0/3253     | NA                         | R01_cb4657_c9/f1p0/3253     | R01_cb4657_c9/f1p0/3253     | NA                          |
| R01_cb14751_c3/f1p1/769     | NA                         | R01_cb14751_c3/f1p1/769     | NA                          | NA                          |
| R01_cb11142_c2/f1p0/2496    | NA                         | R01_cb11142_c2/f1p0/2496    | NA                          | NA                          |
| R01_cb13538_c9/f10p1/776    | NA                         | R01_cb13538_c9/f10p1/776    | NA                          | NA                          |
| R01_cb16319_c0/f3p0/836     | NA                         | NA                          | NA                          | R01_cb16319_c0/f3p0/836     |
| R01_cb17394_c0/f1p0/1335    | NA                         | NA                          | NA                          | R01_cb17394_c0/f1p0/1335    |
| R01_cb14845_c0/f3p1/1699    | NA                         | NA                          | NA                          | R01_cb14845_c0/f3p1/1699    |
| R01_cb3025_c7/f1p0/3430     | NA                         | NA                          | NA                          | R01_cb3025_c7/f1p0/3430     |
| R01_cb8564_c119069/f1p0/189 | NA                         | R01_cb8564_c119069/f1p0/189 | R01_cb8564_c119069/f1p0/189 | R01_cb8564_c119069/f1p0/189 |
| 8                           | NA                         | 8                           | 8                           | 8                           |
| R01_cb8564_c77171/f1p0/3121 | NA                         | R01_cb8564_c77171/f1p0/3121 | NA                          | NA                          |
| R01_cb14086_c1/f2p0/704     | NA                         | NA                          | NA                          | R01_cb14086_c1/f2p0/704     |
| R01_cb18456_c7514/f1p0/808  | NA                         | R01_cb18456_c7514/f1p0/808  | NA                          | NA                          |
| R01_cb8823_c3/f1p2/4298     | NA                         | NA                          | NA                          | R01_cb8823_c3/f1p2/4298     |
| R01_cb18383_c0/f1p0/1437    | NA                         | R01_cb18383_c0/f1p0/1437    | NA                          | R01_cb18383_c0/f1p0/1437    |
| R01_cb479_c3/f6p5/4750      | NA                         | NA                          | NA                          | R01_cb479_c3/f6p5/4750      |
| R01_cb7695_c0/f1p0/2539     | NA                         | NA                          | NA                          | R01_cb7695_c0/f1p0/2539     |
| R01_cb15032_c2/f1p0/1081    | NA                         | NA                          | NA                          | R01_cb15032_c2/f1p0/1081    |
| R01_cb8564_c1824/f1p0/2524  | NA                         | R01_cb8564_c1824/f1p0/2524  | NA                          | NA                          |
| R01_cb4354_c12/f1p1/3170    | NA                         | NA                          | NA                          | R01_cb4354_c12/f1p1/3170    |
| R01_cb1779_c4/f1p0/3691     | NA                         | NA                          | NA                          | R01_cb1779_c4/f1p0/3691     |
| R01_cb8564_c124893/f1p0/348 | NA                         | R01_cb8564_c124893/f1p0/348 | NA                          | NA                          |
| 7                           | NA                         | 7                           | NA                          | NA                          |
| R01_cb8564_c50069/f1p0/2242 | R01_cb8564_c50069/f1p0/224 | R01_cb8564_c50069/f1p0/2242 | NA                          | R01_cb8564_c50069/f1p0/2242 |



|                             |                          |                             |                             |                             |
|-----------------------------|--------------------------|-----------------------------|-----------------------------|-----------------------------|
|                             | 2                        |                             |                             |                             |
| R01_cb709_c12/flp0/2237     | NA                       | R01_cb709_c12/flp0/2237     | NA                          | NA                          |
| R01_cb12452_c10/flp1/889    | NA                       | R01_cb12452_c10/flp1/889    | NA                          | NA                          |
| R01_cb10186_c4/flp0/1588    | NA                       | NA                          | NA                          | R01_cb10186_c4/flp0/1588    |
| R01_cb1860_c13/flp0/2150    | NA                       | NA                          | NA                          | R01_cb1860_c13/flp0/2150    |
| R01_cb3121_c5/flp0/3594     | NA                       | R01_cb3121_c5/flp0/3594     | R01_cb3121_c5/flp0/3594     | NA                          |
| R01_cb14985_c1/flp0/1395    | NA                       | NA                          | NA                          | R01_cb14985_c1/flp0/1395    |
| R01_cb8564_c11574/flp0/3962 | NA                       | R01_cb8564_c11574/flp0/3962 | NA                          | NA                          |
| R01_cb1479_c32/flp0/1175    | NA                       | R01_cb1479_c32/flp0/1175    | NA                          | NA                          |
| R01_cb15828_c0/flp0/1009    | NA                       | R01_cb15828_c0/flp0/1009    | R01_cb15828_c0/flp0/1009    | R01_cb15828_c0/flp0/1009    |
| R01_cb684_c2/flp0/4395      | NA                       | NA                          | NA                          | R01_cb684_c2/flp0/4395      |
| R01_cb8690_c20/flp0/1538    | NA                       | R01_cb8690_c20/flp0/1538    | NA                          | R01_cb8690_c20/flp0/1538    |
| R01_cb8564_c110039/f2p0/407 | NA                       | R01_cb8564_c110039/f2p0/407 | R01_cb8564_c110039/f2p0/407 | NA                          |
| 5                           |                          | 5                           | 5                           |                             |
| R01_cb8356_c1/flp0/1927     | NA                       | R01_cb8356_c1/flp0/1927     | NA                          | NA                          |
| R01_cb1567_c1/flp1/4383     | NA                       | NA                          | NA                          | R01_cb1567_c1/flp1/4383     |
| R01_cb1228_c25/flp0/2415    | NA                       | NA                          | NA                          | R01_cb1228_c25/flp0/2415    |
| R01_cb8564_c12743/flp0/2150 | NA                       | NA                          | NA                          | R01_cb8564_c12743/flp0/2150 |
| R01_cb14792_c1/flp0/1720    | NA                       | R01_cb14792_c1/flp0/1720    | NA                          | NA                          |
| R01_cb2357_c6/flp0/4143     | NA                       | NA                          | NA                          | R01_cb2357_c6/flp0/4143     |
| R01_cb9009_c6/flp0/4294     | NA                       | R01_cb9009_c6/flp0/4294     | NA                          | NA                          |
| R01_cb8564_c75993/flp0/4476 | NA                       | NA                          | NA                          | R01_cb8564_c75993/flp0/4476 |
| R01_cb1030_c18/flp0/2489    | NA                       | NA                          | NA                          | R01_cb1030_c18/flp0/2489    |
| R01_cb8970_c1/flp0/2482     | NA                       | R01_cb8970_c1/flp0/2482     | NA                          | NA                          |
| R01_cb1333_c90/flp0/2033    | R01_cb1333_c90/flp0/2033 | R01_cb1333_c90/flp0/2033    | R01_cb1333_c90/flp0/2033    | R01_cb1333_c90/flp0/2033    |
| R01_cb8564_c91709/flp1/2474 | NA                       | NA                          | NA                          | R01_cb8564_c91709/flp1/2474 |

|                             |                          |                             |                             |                             |
|-----------------------------|--------------------------|-----------------------------|-----------------------------|-----------------------------|
| R01_cb17276_c4/flp0/444     | NA                       | R01_cb17276_c4/flp0/444     | NA                          | R01_cb17276_c4/flp0/444     |
| R01_cb12098_c27/flp0/626    | R01_cb12098_c27/flp0/626 | R01_cb12098_c27/flp0/626    | R01_cb12098_c27/flp0/626    | R01_cb12098_c27/flp0/626    |
| R01_cb16199_c1/flp0/808     | R01_cb16199_c1/flp0/808  | R01_cb16199_c1/flp0/808     | R01_cb16199_c1/flp0/808     | R01_cb16199_c1/flp0/808     |
| R01_cb9818_c4/flp0/398      | NA                       | R01_cb9818_c4/flp0/398      | NA                          | R01_cb9818_c4/flp0/398      |
| R01_cb11440_c2/flp0/986     | NA                       | NA                          | NA                          | R01_cb11440_c2/flp0/986     |
| R01_cb12722_c17/flp0/1712   | NA                       | NA                          | NA                          | R01_cb12722_c17/flp0/1712   |
| R01_cb18178_c1/flp0/853     | NA                       | NA                          | NA                          | R01_cb18178_c1/flp0/853     |
| R01_cb11190_c2/flp0/2717    | NA                       | NA                          | NA                          | R01_cb11190_c2/flp0/2717    |
| R01_cb2072_c33/flp0/3133    | NA                       | NA                          | NA                          | R01_cb2072_c33/flp0/3133    |
| R01_cb6375_c7/flp0/3856     | NA                       | NA                          | NA                          | R01_cb6375_c7/flp0/3856     |
| R01_cb13545_c37/flp0/708    | NA                       | NA                          | NA                          | R01_cb13545_c37/flp0/708    |
| R01_cb6792_c8/flp1/2711     | NA                       | NA                          | NA                          | R01_cb6792_c8/flp1/2711     |
| R01_cb5158_c0/f3p0/1341     | NA                       | NA                          | NA                          | R01_cb5158_c0/f3p0/1341     |
| R01_cb10161_c3/flp0/695     | NA                       | R01_cb10161_c3/flp0/695     | NA                          | NA                          |
| R01_cb18250_c0/flp0/1093    | NA                       | R01_cb18250_c0/flp0/1093    | NA                          | NA                          |
| R01_cb2970_c3/f2p0/3720     | NA                       | R01_cb2970_c3/f2p0/3720     | NA                          | R01_cb2970_c3/f2p0/3720     |
| R01_cb15701_c1/flp0/1582    | NA                       | R01_cb15701_c1/flp0/1582    | R01_cb15701_c1/flp0/1582    | R01_cb15701_c1/flp0/1582    |
| R01_cb13920_c4/flp0/1358    | NA                       | R01_cb13920_c4/flp0/1358    | NA                          | NA                          |
| R01_cb11828_c0/flp0/1022    | NA                       | R01_cb11828_c0/flp0/1022    | NA                          | NA                          |
| R01_cb10611_c3/flp0/2122    | NA                       | NA                          | NA                          | R01_cb10611_c3/flp0/2122    |
| R01_cb8564_c84847/flp0/2279 | NA                       | R01_cb8564_c84847/flp0/2279 | R01_cb8564_c84847/flp0/2279 | R01_cb8564_c84847/flp0/2279 |
| R01_cb3079_c5/flp0/2068     | NA                       | NA                          | NA                          | R01_cb3079_c5/flp0/2068     |
| R01_cb2027_c1/flp0/4082     | NA                       | NA                          | R01_cb2027_c1/flp0/4082     | NA                          |
| R01_cb10917_c5/flp0/1172    | NA                       | R01_cb10917_c5/flp0/1172    | NA                          | NA                          |
| R01_cb8564_c37993/flp0/3281 | NA                       | NA                          | NA                          | R01_cb8564_c37993/flp0/3281 |
| R01_cb101_c1/flp0/2131      | NA                       | NA                          | NA                          | R01_cb101_c1/flp0/2131      |

|                             |                            |                             |                            |                             |
|-----------------------------|----------------------------|-----------------------------|----------------------------|-----------------------------|
| R01_cb7530_c4/flp1/2539     | NA                         | NA                          | NA                         | R01_cb7530_c4/flp1/2539     |
| R01_cb17363_c10/flp0/407    | R01_cb17363_c10/flp0/407   | R01_cb17363_c10/flp0/407    | R01_cb17363_c10/flp0/407   | NA                          |
| R01_cb4943_c0/flp0/3164     | R01_cb4943_c0/flp0/3164    | R01_cb4943_c0/flp0/3164     | NA                         | NA                          |
| R01_cb17973_c53/flp0/1649   | NA                         | R01_cb17973_c53/flp0/1649   | NA                         | R01_cb17973_c53/flp0/1649   |
| R01_cb11344_c3/flp0/621     | R01_cb11344_c3/flp0/621    | R01_cb11344_c3/flp0/621     | NA                         | R01_cb11344_c3/flp0/621     |
| R01_cb2161_c12/flp1/6037    | NA                         | NA                          | NA                         | R01_cb2161_c12/flp1/6037    |
| R01_cb6947_c12/flp0/2035    | NA                         | NA                          | NA                         | R01_cb6947_c12/flp0/2035    |
| R01_cb1307_c21/flp0/2796    | NA                         | R01_cb1307_c21/flp0/2796    | R01_cb1307_c21/flp0/2796   | NA                          |
| R01_cb11538_c0/flp0/562     | NA                         | R01_cb11538_c0/flp0/562     | NA                         | R01_cb11538_c0/flp0/562     |
| R01_cb18456_c2314/flp0/497  | R01_cb18456_c2314/flp0/497 | R01_cb18456_c2314/flp0/497  | R01_cb18456_c2314/flp0/497 | R01_cb18456_c2314/flp0/497  |
| R01_cb11212_c2/flp0/2170    | NA                         | R01_cb11212_c2/flp0/2170    | NA                         | NA                          |
| R01_cb8564_c74859/flp2/2677 | NA                         | R01_cb8564_c74859/flp2/2677 | NA                         | NA                          |
| R01_cb4268_c2/flp0/2781     | NA                         | NA                          | NA                         | R01_cb4268_c2/flp0/2781     |
| R01_cb2104_c11/flp0/1367    | NA                         | NA                          | R01_cb2104_c11/flp0/1367   | R01_cb2104_c11/flp0/1367    |
| R01_cb5139_c5/flp0/3383     | NA                         | NA                          | NA                         | R01_cb5139_c5/flp0/3383     |
| R01_cb12819_c4/flp0/518     | NA                         | R01_cb12819_c4/flp0/518     | NA                         | NA                          |
| R01_cb8564_c84694/f3p1/2594 | NA                         | NA                          | NA                         | R01_cb8564_c84694/f3p1/2594 |
| R01_cb5758_c3/flp0/3000     | NA                         | R01_cb5758_c3/flp0/3000     | R01_cb5758_c3/flp0/3000    | R01_cb5758_c3/flp0/3000     |
| R01_cb4338_c5/flp0/889      | NA                         | NA                          | NA                         | R01_cb4338_c5/flp0/889      |
| R01_cb11677_c1/flp0/2817    | NA                         | R01_cb11677_c1/flp0/2817    | R01_cb11677_c1/flp0/2817   | R01_cb11677_c1/flp0/2817    |
| R01_cb17975_c0/flp0/961     | NA                         | NA                          | NA                         | R01_cb17975_c0/flp0/961     |
| R01_cb6606_c10/flp0/2105    | NA                         | NA                          | NA                         | R01_cb6606_c10/flp0/2105    |
| R01_cb6715_c1/flp0/4218     | NA                         | NA                          | NA                         | R01_cb6715_c1/flp0/4218     |
| R01_cb16772_c2/flp0/1355    | NA                         | NA                          | NA                         | R01_cb16772_c2/flp0/1355    |
| R01_cb18355_c2/flp0/5068    | NA                         | R01_cb18355_c2/flp0/5068    | R01_cb18355_c2/flp0/5068   | NA                          |
| R01_cb10017_c71/flp0/489    | R01_cb10017_c71/flp0/489   | R01_cb10017_c71/flp0/489    | NA                         | NA                          |

|                                  |                            |                             |                            |                                  |
|----------------------------------|----------------------------|-----------------------------|----------------------------|----------------------------------|
| R01_cb2170_c4/flp0/7876          | R01_cb2170_c4/flp0/7876    | NA                          | NA                         | NA                               |
| R01_cb18456_c3247/flp0/884       | NA                         | R01_cb18456_c3247/flp0/884  | NA                         | NA                               |
| R01_cb7802_c1/f5p2/1708          | NA                         | NA                          | NA                         | R01_cb7802_c1/f5p2/1708          |
| R01_cb17589_c6/flp0/1450         | NA                         | NA                          | NA                         | R01_cb17589_c6/flp0/1450         |
| R01_cb16269_c1/flp0/764          | NA                         | NA                          | NA                         | R01_cb16269_c1/flp0/764          |
| R01_cb7441_c6/flp0/1891          | NA                         | R01_cb7441_c6/flp0/1891     | NA                         | NA                               |
| R01_cb11912_c0/flp0/1267         | NA                         | NA                          | NA                         | R01_cb11912_c0/flp0/1267         |
| R01_cb13112_c14/flp0/724         | NA                         | NA                          | R01_cb13112_c14/flp0/724   | R01_cb13112_c14/flp0/724         |
| R01_cb13214_c9/flp0/402          | R01_cb13214_c9/flp0/402    | R01_cb13214_c9/flp0/402     | NA                         | NA                               |
| R01_cb1459_c4/flp1/2579          | NA                         | R01_cb1459_c4/flp1/2579     | NA                         | NA                               |
| R01_cb18409_c72/flp0/1479        | NA                         | R01_cb18409_c72/flp0/1479   | R01_cb18409_c72/flp0/1479  | R01_cb18409_c72/flp0/1479        |
| R01_cb18456_c6979/flp0/492       | R01_cb18456_c6979/flp0/492 | R01_cb18456_c6979/flp0/492  | R01_cb18456_c6979/flp0/492 | R01_cb18456_c6979/flp0/492       |
| R01_cb8909_c10/flp1/1976         | NA                         | R01_cb8909_c10/flp1/1976    | NA                         | NA                               |
| R01_cb5909_c13/flp0/782          | NA                         | NA                          | NA                         | R01_cb5909_c13/flp0/782          |
| R01_cb14344_c3/flp0/1259         | NA                         | R01_cb14344_c3/flp0/1259    | R01_cb14344_c3/flp0/1259   | R01_cb14344_c3/flp0/1259         |
| R01_cb16755_c1/flp0/1708         | NA                         | R01_cb16755_c1/flp0/1708    | NA                         | NA                               |
| R01_cb8564_c147548/f5p1/324<br>3 | NA                         | NA                          | NA                         | R01_cb8564_c147548/f5p1/324<br>3 |
| R01_cb8131_c4/flp0/995           | NA                         | NA                          | NA                         | R01_cb8131_c4/flp0/995           |
| R01_cb13943_c6/flp1/1376         | NA                         | NA                          | NA                         | R01_cb13943_c6/flp1/1376         |
| R01_cb17756_c13/flp0/1400        | R01_cb17756_c13/flp0/1400  | R01_cb17756_c13/flp0/1400   | R01_cb17756_c13/flp0/1400  | R01_cb17756_c13/flp0/1400        |
| R01_cb2108_c24/flp0/1390         | NA                         | R01_cb2108_c24/flp0/1390    | NA                         | NA                               |
| R01_cb12432_c1/f22p1/567         | NA                         | NA                          | R01_cb12432_c1/f22p1/567   | R01_cb12432_c1/f22p1/567         |
| R01_cb167_c59/flp0/2031          | NA                         | NA                          | NA                         | R01_cb167_c59/flp0/2031          |
| R01_cb8564_c88325/flp0/2456      | NA                         | R01_cb8564_c88325/flp0/2456 | NA                         | R01_cb8564_c88325/flp0/2456      |
| R01_cb1178_c10/flp0/2304         | NA                         | NA                          | NA                         | R01_cb1178_c10/flp0/2304         |

|                             |                             |                             |                             |                             |
|-----------------------------|-----------------------------|-----------------------------|-----------------------------|-----------------------------|
| R01_cb8941_c4/flp0/1811     | NA                          | NA                          | NA                          | R01_cb8941_c4/flp0/1811     |
| R01_cb8564_c11905/flp0/3160 | NA                          | R01_cb8564_c11905/flp0/3160 | R01_cb8564_c11905/flp0/3160 | R01_cb8564_c11905/flp0/3160 |
| R01_cb5234_c10/flp0/7710    | NA                          | NA                          | NA                          | R01_cb5234_c10/flp0/7710    |
| R01_cb3575_c7/flp1/3444     | NA                          | NA                          | NA                          | R01_cb3575_c7/flp1/3444     |
| R01_cb10950_c1/flp0/2520    | R01_cb10950_c1/flp0/2520    | R01_cb10950_c1/flp0/2520    | NA                          | NA                          |
| R01_cb2451_c39/flp0/3469    | NA                          | NA                          | NA                          | R01_cb2451_c39/flp0/3469    |
| R01_cb13801_c3/f4p0/598     | NA                          | R01_cb13801_c3/f4p0/598     | NA                          | NA                          |
| R01_cb17973_c47/flp1/887    | NA                          | NA                          | R01_cb17973_c47/flp1/887    | R01_cb17973_c47/flp1/887    |
| R01_cb17973_c38/flp0/480    | NA                          | R01_cb17973_c38/flp0/480    | R01_cb17973_c38/flp0/480    | NA                          |
| R01_cb8564_c84862/flp2/2064 | NA                          | R01_cb8564_c84862/flp2/2064 | NA                          | NA                          |
| R01_cb8564_c129794/flp0/225 | R01_cb8564_c129794/flp0/225 | R01_cb8564_c129794/flp0/225 | R01_cb8564_c129794/flp0/225 | R01_cb8564_c129794/flp0/225 |
| 9                           | 59                          | 9                           | 9                           | 9                           |
| R01_cb8104_c5/flp0/1048     | NA                          | NA                          | NA                          | R01_cb8104_c5/flp0/1048     |
| R01_cb16719_c2/flp0/969     | NA                          | R01_cb16719_c2/flp0/969     | NA                          | NA                          |
| R01_cb5471_c13/flp1/2689    | NA                          | NA                          | NA                          | R01_cb5471_c13/flp1/2689    |
| R01_cb15777_c2/flp0/1094    | NA                          | NA                          | NA                          | R01_cb15777_c2/flp0/1094    |
| R01_cb1905_c13/flp0/3167    | NA                          | R01_cb1905_c13/flp0/3167    | R01_cb1905_c13/flp0/3167    | NA                          |
| R01_cb13696_c4/flp0/1591    | NA                          | NA                          | NA                          | R01_cb13696_c4/flp0/1591    |
| R01_cb9506_c11/flp0/1083    | NA                          | NA                          | NA                          | R01_cb9506_c11/flp0/1083    |
| R01_cb8564_c91056/flp2/2552 | NA                          | NA                          | NA                          | R01_cb8564_c91056/flp2/2552 |
| R01_cb6861_c10/flp0/2927    | R01_cb6861_c10/flp0/2927    | R01_cb6861_c10/flp0/2927    | NA                          | R01_cb6861_c10/flp0/2927    |
| R01_cb7221_c13/flp1/2577    | NA                          | NA                          | NA                          | R01_cb7221_c13/flp1/2577    |
| R01_cb9747_c1/flp1/2201     | NA                          | R01_cb9747_c1/flp1/2201     | NA                          | NA                          |
| R01_cb2164_c1/flp0/3263     | NA                          | R01_cb2164_c1/flp0/3263     | NA                          | NA                          |
| R01_cb8782_c0/flp0/2273     | NA                          | NA                          | NA                          | R01_cb8782_c0/flp0/2273     |
| R01_cb8564_c2728/flp0/2835  | NA                          | R01_cb8564_c2728/flp0/2835  | R01_cb8564_c2728/flp0/2835  | R01_cb8564_c2728/flp0/2835  |

|                                  |                          |                                  |                                  |                                  |
|----------------------------------|--------------------------|----------------------------------|----------------------------------|----------------------------------|
| R01_cb8564_c111209/f1p0/290<br>7 | NA                       | R01_cb8564_c111209/f1p0/290<br>7 | R01_cb8564_c111209/f1p0/290<br>7 | R01_cb8564_c111209/f1p0/290<br>7 |
| R01_cb9723_c2/f1p0/1998          | NA                       | NA                               | NA                               | R01_cb9723_c2/f1p0/1998          |
| R01_cb6732_c26/f1p0/680          | NA                       | R01_cb6732_c26/f1p0/680          | NA                               | R01_cb6732_c26/f1p0/680          |
| R01_cb17251_c8/f1p0/1878         | R01_cb17251_c8/f1p0/1878 | R01_cb17251_c8/f1p0/1878         | R01_cb17251_c8/f1p0/1878         | R01_cb17251_c8/f1p0/1878         |
| R01_cb8564_c109489/f3p0/291<br>4 | NA                       | R01_cb8564_c109489/f3p0/291<br>4 | NA                               | NA                               |
| R01_cb18753_c0/f1p1/5035         | NA                       | R01_cb18753_c0/f1p1/5035         | R01_cb18753_c0/f1p1/5035         | R01_cb18753_c0/f1p1/5035         |
| R01_cb9993_c6/f1p0/1174          | NA                       | NA                               | NA                               | R01_cb9993_c6/f1p0/1174          |
| R01_cb17172_c1/f1p0/1363         | NA                       | R01_cb17172_c1/f1p0/1363         | NA                               | R01_cb17172_c1/f1p0/1363         |
| R01_cb4455_c11/f1p1/2840         | NA                       | R01_cb4455_c11/f1p1/2840         | NA                               | NA                               |
| R01_cb15998_c2/f1p0/1533         | NA                       | NA                               | NA                               | R01_cb15998_c2/f1p0/1533         |
| R01_cb14940_c5/f1p0/1420         | NA                       | R01_cb14940_c5/f1p0/1420         | R01_cb14940_c5/f1p0/1420         | NA                               |
| R01_cb12421_c70/f1p7/721         | NA                       | R01_cb12421_c70/f1p7/721         | NA                               | NA                               |
| R01_cb16997_c98/f1p0/2258        | NA                       | R01_cb16997_c98/f1p0/2258        | NA                               | NA                               |
| R01_cb13834_c2/f1p0/706          | R01_cb13834_c2/f1p0/706  | R01_cb13834_c2/f1p0/706          | R01_cb13834_c2/f1p0/706          | R01_cb13834_c2/f1p0/706          |
| R01_cb8991_c9/f1p0/2306          | NA                       | NA                               | NA                               | R01_cb8991_c9/f1p0/2306          |
| R01_cb14761_c2/f2p0/789          | R01_cb14761_c2/f2p0/789  | R01_cb14761_c2/f2p0/789          | R01_cb14761_c2/f2p0/789          | R01_cb14761_c2/f2p0/789          |
| R01_cb13249_c2/f1p0/1126         | NA                       | NA                               | NA                               | R01_cb13249_c2/f1p0/1126         |
| R01_cb8407_c4/f1p0/918           | R01_cb8407_c4/f1p0/918   | R01_cb8407_c4/f1p0/918           | R01_cb8407_c4/f1p0/918           | R01_cb8407_c4/f1p0/918           |
| R01_cb8564_c81705/f1p0/2305      | NA                       | R01_cb8564_c81705/f1p0/2305      | NA                               | NA                               |
| R01_cb2845_c4/f2p1/3455          | NA                       | NA                               | NA                               | R01_cb2845_c4/f2p1/3455          |
| R01_cb11232_c3/f1p0/2508         | NA                       | R01_cb11232_c3/f1p0/2508         | R01_cb11232_c3/f1p0/2508         | NA                               |
| R01_cb2488_c1/f1p0/3123          | NA                       | R01_cb2488_c1/f1p0/3123          | R01_cb2488_c1/f1p0/3123          | NA                               |
| R01_cb8564_c18112/f1p0/2321      | NA                       | NA                               | R01_cb8564_c18112/f1p0/2321      | R01_cb8564_c18112/f1p0/2321      |
| R01_cb14337_c8/f1p0/709          | NA                       | NA                               | NA                               | R01_cb14337_c8/f1p0/709          |

|                             |                          |                             |                             |                             |
|-----------------------------|--------------------------|-----------------------------|-----------------------------|-----------------------------|
| R01_cb16095_c2/f1p0/1146    | NA                       | R01_cb16095_c2/f1p0/1146    | NA                          | NA                          |
| R01_cb10380_c0/f2p1/833     | NA                       | NA                          | NA                          | R01_cb10380_c0/f2p1/833     |
| R01_cb15516_c0/f2p0/1385    | NA                       | NA                          | NA                          | R01_cb15516_c0/f2p0/1385    |
| R01_cb10611_c5/f1p0/1402    | NA                       | NA                          | NA                          | R01_cb10611_c5/f1p0/1402    |
| R01_cb13433_c99/f1p0/650    | R01_cb13433_c99/f1p0/650 | R01_cb13433_c99/f1p0/650    | R01_cb13433_c99/f1p0/650    | R01_cb13433_c99/f1p0/650    |
| R01_cb5855_c2/f1p0/2032     | NA                       | R01_cb5855_c2/f1p0/2032     | NA                          | NA                          |
| R01_cb8031_c0/f4p0/2437     | NA                       | NA                          | R01_cb8031_c0/f4p0/2437     | R01_cb8031_c0/f4p0/2437     |
| R01_cb9583_c5/f1p0/1887     | NA                       | R01_cb9583_c5/f1p0/1887     | NA                          | NA                          |
| R01_cb13283_c10/f1p0/1848   | NA                       | NA                          | NA                          | R01_cb13283_c10/f1p0/1848   |
| R01_cb10062_c29/f1p0/688    | NA                       | NA                          | NA                          | R01_cb10062_c29/f1p0/688    |
| R01_cb18223_c27/f1p0/739    | R01_cb18223_c27/f1p0/739 | R01_cb18223_c27/f1p0/739    | R01_cb18223_c27/f1p0/739    | R01_cb18223_c27/f1p0/739    |
| R01_cb8564_c70645/f1p0/3759 | NA                       | R01_cb8564_c70645/f1p0/3759 | R01_cb8564_c70645/f1p0/3759 | R01_cb8564_c70645/f1p0/3759 |
| R01_cb2821_c3/f1p0/1030     | NA                       | R01_cb2821_c3/f1p0/1030     | NA                          | NA                          |
| R01_cb8564_c2089/f1p0/2900  | NA                       | R01_cb8564_c2089/f1p0/2900  | R01_cb8564_c2089/f1p0/2900  | R01_cb8564_c2089/f1p0/2900  |
| R01_cb17756_c2/f3p0/314     | NA                       | R01_cb17756_c2/f3p0/314     | R01_cb17756_c2/f3p0/314     | R01_cb17756_c2/f3p0/314     |
| R01_cb1739_c15/f1p0/5595    | NA                       | NA                          | NA                          | R01_cb1739_c15/f1p0/5595    |
| R01_cb10333_c6/f1p0/375     | R01_cb10333_c6/f1p0/375  | R01_cb10333_c6/f1p0/375     | NA                          | R01_cb10333_c6/f1p0/375     |
| R01_cb3563_c0/f2p0/1482     | NA                       | NA                          | NA                          | R01_cb3563_c0/f2p0/1482     |
| R01_cb8107_c0/f2p0/420      | R01_cb8107_c0/f2p0/420   | R01_cb8107_c0/f2p0/420      | R01_cb8107_c0/f2p0/420      | R01_cb8107_c0/f2p0/420      |
| R01_cb10353_c2/f1p0/660     | NA                       | R01_cb10353_c2/f1p0/660     | R01_cb10353_c2/f1p0/660     | R01_cb10353_c2/f1p0/660     |
| R01_cb6037_c1/f2p1/2755     | NA                       | R01_cb6037_c1/f2p1/2755     | NA                          | NA                          |
| R01_cb2826_c9/f1p0/2724     | NA                       | R01_cb2826_c9/f1p0/2724     | NA                          | NA                          |
| R01_cb7539_c3/f1p0/2258     | NA                       | NA                          | R01_cb7539_c3/f1p0/2258     | R01_cb7539_c3/f1p0/2258     |
| R01_cb8564_c10740/f1p0/2021 | NA                       | R01_cb8564_c10740/f1p0/2021 | NA                          | R01_cb8564_c10740/f1p0/2021 |
| R01_cb8564_c81245/f1p0/2959 | NA                       | R01_cb8564_c81245/f1p0/2959 | NA                          | NA                          |
| R01_cb14947_c1/f1p1/567     | R01_cb14947_c1/f1p1/567  | R01_cb14947_c1/f1p1/567     | NA                          | R01_cb14947_c1/f1p1/567     |

|                             |                          |                             |                             |                             |
|-----------------------------|--------------------------|-----------------------------|-----------------------------|-----------------------------|
| R01_cb6278_c7/flp0/2569     | NA                       | NA                          | NA                          | R01_cb6278_c7/flp0/2569     |
| R01_cb1138_c8/f3p0/2824     | NA                       | NA                          | R01_cb1138_c8/f3p0/2824     | NA                          |
| R01_cb4529_c13/flp0/614     | NA                       | R01_cb4529_c13/flp0/614     | NA                          | NA                          |
| R01_cb13021_c0/f4p0/544     | R01_cb13021_c0/f4p0/544  | R01_cb13021_c0/f4p0/544     | NA                          | NA                          |
| R01_cb2804_c141/flp0/2031   | NA                       | R01_cb2804_c141/flp0/2031   | R01_cb2804_c141/flp0/2031   | R01_cb2804_c141/flp0/2031   |
| R01_cb5739_c1/flp0/2437     | NA                       | R01_cb5739_c1/flp0/2437     | R01_cb5739_c1/flp0/2437     | NA                          |
| R01_cb16590_c1/flp0/1306    | R01_cb16590_c1/flp0/1306 | R01_cb16590_c1/flp0/1306    | R01_cb16590_c1/flp0/1306    | R01_cb16590_c1/flp0/1306    |
| R01_cb13715_c0/flp0/327     | R01_cb13715_c0/flp0/327  | R01_cb13715_c0/flp0/327     | R01_cb13715_c0/flp0/327     | R01_cb13715_c0/flp0/327     |
| R01_cb8564_c73845/flp0/3547 | NA                       | R01_cb8564_c73845/flp0/3547 | NA                          | NA                          |
| R01_cb8564_c109985/f4p0/333 | NA                       | R01_cb8564_c109985/f4p0/333 | R01_cb8564_c109985/f4p0/333 | R01_cb8564_c109985/f4p0/333 |
| 3                           |                          | 3                           | 3                           | 3                           |
| R01_cb11624_c2/flp0/738     | R01_cb11624_c2/flp0/738  | R01_cb11624_c2/flp0/738     | R01_cb11624_c2/flp0/738     | R01_cb11624_c2/flp0/738     |
| R01_cb4469_c12/flp0/1520    | NA                       | NA                          | NA                          | R01_cb4469_c12/flp0/1520    |
| R01_cb8564_c123532/flp0/302 | NA                       | R01_cb8564_c123532/flp0/302 | R01_cb8564_c123532/flp0/302 | NA                          |
| 8                           |                          | 8                           | 8                           |                             |
| R01_cb4777_c0/f3p0/733      | NA                       | NA                          | NA                          | R01_cb4777_c0/f3p0/733      |
| R01_cb17973_c25/flp0/888    | R01_cb17973_c25/flp0/888 | R01_cb17973_c25/flp0/888    | R01_cb17973_c25/flp0/888    | NA                          |
| R01_cb6885_c2/flp0/2745     | NA                       | NA                          | NA                          | R01_cb6885_c2/flp0/2745     |
| R01_cb13545_c32/flp0/832    | NA                       | NA                          | R01_cb13545_c32/flp0/832    | R01_cb13545_c32/flp0/832    |
| R01_cb10042_c0/flp0/1693    | NA                       | NA                          | NA                          | R01_cb10042_c0/flp0/1693    |
| R01_cb8564_c111833/flp0/257 | NA                       | R01_cb8564_c111833/flp0/257 | NA                          | R01_cb8564_c111833/flp0/257 |
| 4                           |                          | 4                           |                             | 4                           |
| R01_cb16125_c21/flp0/1679   | NA                       | R01_cb16125_c21/flp0/1679   | NA                          | R01_cb16125_c21/flp0/1679   |
| R01_cb12165_c16/flp0/959    | NA                       | R01_cb12165_c16/flp0/959    | NA                          | NA                          |
| R01_cb5647_c0/f4p0/3050     | NA                       | NA                          | NA                          | R01_cb5647_c0/f4p0/3050     |
| R01_cb7611_c14/flp0/2456    | NA                       | NA                          | NA                          | R01_cb7611_c14/flp0/2456    |



|                                  |    |                                  |                             |                                  |
|----------------------------------|----|----------------------------------|-----------------------------|----------------------------------|
| R01_cb8564_c124964/flp0/214<br>2 | NA | NA                               | NA                          | R01_cb8564_c124964/flp0/214<br>2 |
| R01_cb13688_c3/flp0/1199         | NA | R01_cb13688_c3/flp0/1199         | NA                          | NA                               |
| R01_cb8564_c2908/flp0/4349       | NA | R01_cb8564_c2908/flp0/4349       | NA                          | NA                               |
| R01_cb2806_c4/flp0/3477          | NA | NA                               | NA                          | R01_cb2806_c4/flp0/3477          |
| R01_cb3699_c7/flp0/2126          | NA | R01_cb3699_c7/flp0/2126          | NA                          | NA                               |
| R01_cb18591_c1/flp0/756          | NA | R01_cb18591_c1/flp0/756          | R01_cb18591_c1/flp0/756     | R01_cb18591_c1/flp0/756          |
| R01_cb4627_c1/flp0/2699          | NA | NA                               | NA                          | R01_cb4627_c1/flp0/2699          |
| R01_cb12427_c2/flp0/1451         | NA | R01_cb12427_c2/flp0/1451         | NA                          | NA                               |
| R01_cb16123_c0/f2p0/1577         | NA | R01_cb16123_c0/f2p0/1577         | NA                          | NA                               |
| R01_cb8564_c14195/flp0/3596      | NA | R01_cb8564_c14195/flp0/3596      | R01_cb8564_c14195/flp0/3596 | R01_cb8564_c14195/flp0/3596      |
| R01_cb9313_c1/flp0/2119          | NA | R01_cb9313_c1/flp0/2119          | NA                          | R01_cb9313_c1/flp0/2119          |
| R01_cb7419_c4/flp1/2584          | NA | NA                               | NA                          | R01_cb7419_c4/flp1/2584          |
| R01_cb8564_c77314/f9p0/3031      | NA | R01_cb8564_c77314/f9p0/3031      | R01_cb8564_c77314/f9p0/3031 | NA                               |
| R01_cb8564_c117355/flp0/243<br>1 | NA | R01_cb8564_c117355/flp0/243<br>1 | NA                          | NA                               |
| R01_cb8564_c80964/flp0/2248      | NA | R01_cb8564_c80964/flp0/2248      | R01_cb8564_c80964/flp0/2248 | R01_cb8564_c80964/flp0/2248      |
| R01_cb18409_c23/f2p0/447         | NA | R01_cb18409_c23/f2p0/447         | R01_cb18409_c23/f2p0/447    | R01_cb18409_c23/f2p0/447         |
| R01_cb7342_c4/flp1/2046          | NA | NA                               | NA                          | R01_cb7342_c4/flp1/2046          |
| R01_cb8706_c2/flp0/2252          | NA | R01_cb8706_c2/flp0/2252          | NA                          | NA                               |
| R01_cb8564_c3039/flp0/2656       | NA | R01_cb8564_c3039/flp0/2656       | NA                          | NA                               |
| R01_cb8564_c39047/flp0/2845      | NA | R01_cb8564_c39047/flp0/2845      | NA                          | NA                               |
| R01_cb13897_c1/flp1/1422         | NA | NA                               | NA                          | R01_cb13897_c1/flp1/1422         |
| R01_cb1124_c16/flp0/1079         | NA | NA                               | NA                          | R01_cb1124_c16/flp0/1079         |
| R01_cb8056_c7/flp0/4756          | NA | R01_cb8056_c7/flp0/4756          | NA                          | NA                               |
| R01_cb16247_c1/flp0/539          | NA | R01_cb16247_c1/flp0/539          | R01_cb16247_c1/flp0/539     | R01_cb16247_c1/flp0/539          |

|                             |                             |                             |                           |                             |
|-----------------------------|-----------------------------|-----------------------------|---------------------------|-----------------------------|
| R01_cb9168_c3/flp0/2165     | NA                          | R01_cb9168_c3/flp0/2165     | NA                        | NA                          |
| R01_cb17098_c0/flp0/663     | R01_cb17098_c0/flp0/663     | R01_cb17098_c0/flp0/663     | NA                        | NA                          |
| R01_cb3655_c0/f2p0/2991     | NA                          | R01_cb3655_c0/f2p0/2991     | NA                        | NA                          |
| R01_cb4140_c11/flp0/3083    | NA                          | NA                          | NA                        | R01_cb4140_c11/flp0/3083    |
| R01_cb12666_c5/flp0/1889    | NA                          | R01_cb12666_c5/flp0/1889    | NA                        | NA                          |
| R01_cb10261_c2/flp0/1677    | NA                          | R01_cb10261_c2/flp0/1677    | NA                        | NA                          |
| R01_cb7942_c14/flp0/1977    | NA                          | R01_cb7942_c14/flp0/1977    | NA                        | NA                          |
| R01_cb17756_c17/flp0/1768   | R01_cb17756_c17/flp0/1768   | R01_cb17756_c17/flp0/1768   | R01_cb17756_c17/flp0/1768 | R01_cb17756_c17/flp0/1768   |
| R01_cb3941_c87/flp0/1928    | NA                          | R01_cb3941_c87/flp0/1928    | NA                        | NA                          |
| R01_cb8564_c68740/f3p0/3027 | NA                          | NA                          | NA                        | R01_cb8564_c68740/f3p0/3027 |
| R01_cb124_c39/flp0/2659     | NA                          | R01_cb124_c39/flp0/2659     | NA                        | R01_cb124_c39/flp0/2659     |
| R01_cb16950_c0/flp0/958     | NA                          | R01_cb16950_c0/flp0/958     | NA                        | NA                          |
| R01_cb8564_c85126/f2p0/3277 | R01_cb8564_c85126/f2p0/3277 | R01_cb8564_c85126/f2p0/3277 | NA                        | NA                          |
| R01_cb8564_c14252/flp0/2308 | NA                          | R01_cb8564_c14252/flp0/2308 | NA                        | R01_cb8564_c14252/flp0/2308 |
| R01_cb8564_c91348/flp0/2713 | NA                          | NA                          | NA                        | R01_cb8564_c91348/flp0/2713 |
| R01_cb11442_c1/flp0/3117    | R01_cb11442_c1/flp0/3117    | R01_cb11442_c1/flp0/3117    | NA                        | NA                          |
| R01_cb9418_c4/flp1/1988     | NA                          | NA                          | NA                        | R01_cb9418_c4/flp1/1988     |
| R01_cb7296_c1/f4p1/2068     | NA                          | NA                          | NA                        | R01_cb7296_c1/f4p1/2068     |
| R01_cb8564_c90285/flp0/2883 | NA                          | NA                          | NA                        | R01_cb8564_c90285/flp0/2883 |
| R01_cb6802_c66/flp0/1928    | NA                          | R01_cb6802_c66/flp0/1928    | R01_cb6802_c66/flp0/1928  | R01_cb6802_c66/flp0/1928    |
| R01_cb1304_c1/f2p0/926      | NA                          | NA                          | NA                        | R01_cb1304_c1/f2p0/926      |
| R01_cb8379_c11/flp0/1372    | NA                          | R01_cb8379_c11/flp0/1372    | NA                        | NA                          |
| R01_cb16256_c1/flp0/716     | R01_cb16256_c1/flp0/716     | R01_cb16256_c1/flp0/716     | R01_cb16256_c1/flp0/716   | R01_cb16256_c1/flp0/716     |
| R01_cb10365_c14/flp0/1680   | NA                          | R01_cb10365_c14/flp0/1680   | NA                        | NA                          |
| R01_cb15038_c15/flp0/489    | R01_cb15038_c15/flp0/489    | R01_cb15038_c15/flp0/489    | NA                        | NA                          |

|                              |                              |                              |                              |                              |
|------------------------------|------------------------------|------------------------------|------------------------------|------------------------------|
| R01_cb6069_c4/flp0/2745      | NA                           | NA                           | NA                           | R01_cb6069_c4/flp0/2745      |
| R01_cb8564_c1991/flp0/2537   | NA                           | R01_cb8564_c1991/flp0/2537   | R01_cb8564_c1991/flp0/2537   | R01_cb8564_c1991/flp0/2537   |
| R01_cb11838_c1/flp0/3003     | R01_cb11838_c1/flp0/3003     | R01_cb11838_c1/flp0/3003     | R01_cb11838_c1/flp0/3003     | R01_cb11838_c1/flp0/3003     |
| R01_cb905_c0/flp0/4576       | NA                           | NA                           | NA                           | R01_cb905_c0/flp0/4576       |
| R01_cb480_c0/flp1/4778       | NA                           | R01_cb480_c0/flp1/4778       | NA                           | R01_cb480_c0/flp1/4778       |
| R01_cb18132_c13/flp0/1614    | NA                           | R01_cb18132_c13/flp0/1614    | NA                           | NA                           |
| R01_cb10921_c3/flp0/1562     | NA                           | NA                           | NA                           | R01_cb10921_c3/flp0/1562     |
| R01_cb8564_c79662/flp0/4430  | NA                           | NA                           | NA                           | R01_cb8564_c79662/flp0/4430  |
| R01_cb12386_c10/flp0/807     | NA                           | R01_cb12386_c10/flp0/807     | R01_cb12386_c10/flp0/807     | R01_cb12386_c10/flp0/807     |
| R01_cb3580_c71/flp1/2713     | NA                           | R01_cb3580_c71/flp1/2713     | NA                           | NA                           |
| R01_cb18526_c12/flp0/858     | R01_cb18526_c12/flp0/858     | R01_cb18526_c12/flp0/858     | R01_cb18526_c12/flp0/858     | R01_cb18526_c12/flp0/858     |
| R01_cb4211_c1/f6p0/2760      | NA                           | R01_cb4211_c1/f6p0/2760      | NA                           | NA                           |
| R01_cb15068_c14/f2p0/1162    | NA                           | R01_cb15068_c14/f2p0/1162    | NA                           | NA                           |
| R01_cb124_c43/flp0/2759      | NA                           | NA                           | NA                           | R01_cb124_c43/flp0/2759      |
| R01_cb4536_c0/flp1/3324      | NA                           | NA                           | NA                           | R01_cb4536_c0/flp1/3324      |
| R01_cb8564_c79463/flp0/2118  | R01_cb8564_c79463/flp0/2118  | R01_cb8564_c79463/flp0/2118  | NA                           | R01_cb8564_c79463/flp0/2118  |
| R01_cb4453_c0/flp0/3346      | NA                           | NA                           | NA                           | R01_cb4453_c0/flp0/3346      |
| R01_cb8703_c3/flp0/1515      | NA                           | R01_cb8703_c3/flp0/1515      | NA                           | NA                           |
| R01_cb8564_c84278/flp0/2530  | NA                           | R01_cb8564_c84278/flp0/2530  | R01_cb8564_c84278/flp0/2530  | NA                           |
| R01_cb8564_c115030/flp0/1946 | R01_cb8564_c115030/flp0/1946 | R01_cb8564_c115030/flp0/1946 | R01_cb8564_c115030/flp0/1946 | R01_cb8564_c115030/flp0/1946 |
| R01_cb10533_c2/flp0/3054     | NA                           | R01_cb10533_c2/flp0/3054     | NA                           | R01_cb10533_c2/flp0/3054     |
| R01_cb2997_c4/flp0/3859      | NA                           | NA                           | NA                           | R01_cb2997_c4/flp0/3859      |
| R01_cb7114_c7/flp0/2312      | NA                           | NA                           | NA                           | R01_cb7114_c7/flp0/2312      |
| R01_cb3680_c5/flp0/1263      | NA                           | NA                           | NA                           | R01_cb3680_c5/flp0/1263      |

|                              |                            |                              |                             |                              |
|------------------------------|----------------------------|------------------------------|-----------------------------|------------------------------|
| R01_cb392_c12/flp0/2249      | R01_cb392_c12/flp0/2249    | R01_cb392_c12/flp0/2249      | R01_cb392_c12/flp0/2249     | R01_cb392_c12/flp0/2249      |
| R01_cb14226_c0/flp0/873      | NA                         | NA                           | R01_cb14226_c0/flp0/873     | R01_cb14226_c0/flp0/873      |
| R01_cb8564_c86578/flp0/2991  | NA                         | R01_cb8564_c86578/flp0/2991  | NA                          | NA                           |
| R01_cb8564_c20384/flp4/2475  | NA                         | R01_cb8564_c20384/flp4/2475  | NA                          | R01_cb8564_c20384/flp4/2475  |
| R01_cb8564_c109543/f3p0/1969 | NA                         | R01_cb8564_c109543/f3p0/1969 | NA                          | R01_cb8564_c109543/f3p0/1969 |
| R01_cb16334_c0/flp0/939      | R01_cb16334_c0/flp0/939    | R01_cb16334_c0/flp0/939      | R01_cb16334_c0/flp0/939     | R01_cb16334_c0/flp0/939      |
| R01_cb2570_c3/f2p1/2455      | NA                         | NA                           | NA                          | R01_cb2570_c3/f2p1/2455      |
| R01_cb9242_c1/flp0/2019      | NA                         | NA                           | R01_cb9242_c1/flp0/2019     | NA                           |
| R01_cb18055_c0/flp0/398      | NA                         | NA                           | R01_cb18055_c0/flp0/398     | R01_cb18055_c0/flp0/398      |
| R01_cb18456_c2541/flp0/789   | R01_cb18456_c2541/flp0/789 | R01_cb18456_c2541/flp0/789   | R01_cb18456_c2541/flp0/789  | R01_cb18456_c2541/flp0/789   |
| R01_cb13003_c7/flp0/1133     | NA                         | R01_cb13003_c7/flp0/1133     | NA                          | NA                           |
| R01_cb18456_c1830/flp0/1793  | NA                         | R01_cb18456_c1830/flp0/1793  | R01_cb18456_c1830/flp0/1793 | R01_cb18456_c1830/flp0/1793  |
| R01_cb1892_c3/flp0/2379      | NA                         | NA                           | NA                          | R01_cb1892_c3/flp0/2379      |
| R01_cb2463_c5/flp0/2823      | NA                         | NA                           | NA                          | R01_cb2463_c5/flp0/2823      |
| R01_cb2962_c19/flp0/2430     | NA                         | R01_cb2962_c19/flp0/2430     | R01_cb2962_c19/flp0/2430    | NA                           |
| R01_cb8564_c78524/flp0/3201  | NA                         | R01_cb8564_c78524/flp0/3201  | R01_cb8564_c78524/flp0/3201 | R01_cb8564_c78524/flp0/3201  |
| R01_cb6285_c2/flp0/2340      | R01_cb6285_c2/flp0/2340    | R01_cb6285_c2/flp0/2340      | R01_cb6285_c2/flp0/2340     | R01_cb6285_c2/flp0/2340      |
| R01_cb18456_c1853/flp0/984   | NA                         | NA                           | NA                          | R01_cb18456_c1853/flp0/984   |
| R01_cb3390_c2/flp0/1813      | NA                         | R01_cb3390_c2/flp0/1813      | NA                          | NA                           |
| R01_cb14968_c16/flp0/1700    | NA                         | NA                           | NA                          | R01_cb14968_c16/flp0/1700    |
| R01_cb6221_c11/flp0/2100     | NA                         | R01_cb6221_c11/flp0/2100     | NA                          | NA                           |
| R01_cb1297_c11/f2p0/3854     | NA                         | NA                           | NA                          | R01_cb1297_c11/f2p0/3854     |
| R01_cb15034_c3/flp0/1650     | R01_cb15034_c3/flp0/1650   | R01_cb15034_c3/flp0/1650     | NA                          | R01_cb15034_c3/flp0/1650     |
| R01_cb8564_c81809/f2p0/2165  | NA                         | NA                           | NA                          | R01_cb8564_c81809/f2p0/2165  |
| R01_cb5412_c2/flp0/3104      | NA                         | NA                           | NA                          | R01_cb5412_c2/flp0/3104      |

|                             |                            |                             |                             |                             |
|-----------------------------|----------------------------|-----------------------------|-----------------------------|-----------------------------|
| R01_cb8564_c35079/flp0/4002 | NA                         | R01_cb8564_c35079/flp0/4002 | NA                          | NA                          |
| R01_cb12133_c1/flp0/1064    | NA                         | NA                          | NA                          | R01_cb12133_c1/flp0/1064    |
| R01_cb18456_c7167/flp0/604  | NA                         | R01_cb18456_c7167/flp0/604  | NA                          | NA                          |
| R01_cb11988_c9/flp0/634     | NA                         | R01_cb11988_c9/flp0/634     | NA                          | NA                          |
| R01_cb14344_c4/flp0/1632    | R01_cb14344_c4/flp0/1632   | R01_cb14344_c4/flp0/1632    | R01_cb14344_c4/flp0/1632    | R01_cb14344_c4/flp0/1632    |
| R01_cb8564_c25480/f2p4/4527 | NA                         | R01_cb8564_c25480/f2p4/4527 | R01_cb8564_c25480/f2p4/4527 | R01_cb8564_c25480/f2p4/4527 |
| R01_cb699_c2/flp0/1518      | NA                         | NA                          | NA                          | R01_cb699_c2/flp0/1518      |
| R01_cb18456_c5139/flp2/634  | R01_cb18456_c5139/flp2/634 | NA                          | NA                          | NA                          |
| R01_cb8433_c13/flp0/2356    | NA                         | NA                          | NA                          | R01_cb8433_c13/flp0/2356    |
| R01_cb9127_c3/flp0/2334     | NA                         | R01_cb9127_c3/flp0/2334     | NA                          | NA                          |
| R01_cb13857_c0/flp0/920     | NA                         | NA                          | NA                          | R01_cb13857_c0/flp0/920     |
| R01_cb4821_c15/flp0/362     | R01_cb4821_c15/flp0/362    | R01_cb4821_c15/flp0/362     | R01_cb4821_c15/flp0/362     | R01_cb4821_c15/flp0/362     |
| R01_cb11120_c4/flp0/862     | NA                         | NA                          | R01_cb11120_c4/flp0/862     | R01_cb11120_c4/flp0/862     |
| R01_cb16814_c1/flp0/693     | NA                         | NA                          | NA                          | R01_cb16814_c1/flp0/693     |
| R01_cb12321_c847/flp0/414   | R01_cb12321_c847/flp0/414  | NA                          | NA                          | NA                          |
| R01_cb8564_c20839/flp0/1972 | NA                         | NA                          | NA                          | R01_cb8564_c20839/flp0/1972 |
| R01_cb396_c69/flp0/1086     | R01_cb396_c69/flp0/1086    | R01_cb396_c69/flp0/1086     | NA                          | R01_cb396_c69/flp0/1086     |
| R01_cb12818_c0/flp0/940     | NA                         | R01_cb12818_c0/flp0/940     | R01_cb12818_c0/flp0/940     | R01_cb12818_c0/flp0/940     |
| R01_cb6453_c3/f2p0/2779     | NA                         | R01_cb6453_c3/f2p0/2779     | R01_cb6453_c3/f2p0/2779     | NA                          |
| R01_cb8564_c124865/flp0/230 | NA                         | R01_cb8564_c124865/flp0/230 | NA                          | R01_cb8564_c124865/flp0/230 |
| 2                           |                            | 2                           |                             | 2                           |
| R01_cb18423_c1/flp0/602     | R01_cb18423_c1/flp0/602    | NA                          | NA                          | R01_cb18423_c1/flp0/602     |
| R01_cb8564_c77683/flp0/2153 | NA                         | NA                          | NA                          | R01_cb8564_c77683/flp0/2153 |
| R01_cb8564_c9762/f2p1/4234  | NA                         | NA                          | NA                          | R01_cb8564_c9762/f2p1/4234  |
| R01_cb11187_c1/flp0/1994    | NA                         | NA                          | R01_cb11187_c1/flp0/1994    | R01_cb11187_c1/flp0/1994    |
| R01_cb5846_c56/flp0/2248    | R01_cb5846_c56/flp0/2248   | R01_cb5846_c56/flp0/2248    | R01_cb5846_c56/flp0/2248    | R01_cb5846_c56/flp0/2248    |

|                              |                              |                              |                              |                              |
|------------------------------|------------------------------|------------------------------|------------------------------|------------------------------|
| R01_cb3368_c1/flp1/2770      | NA                           | NA                           | NA                           | R01_cb3368_c1/flp1/2770      |
| R01_cb16475_c0/flp0/625      | R01_cb16475_c0/flp0/625      | R01_cb16475_c0/flp0/625      | R01_cb16475_c0/flp0/625      | R01_cb16475_c0/flp0/625      |
| R01_cb15176_c1/flp0/948      | NA                           | R01_cb15176_c1/flp0/948      | NA                           | NA                           |
| R01_cb18409_c150/flp0/498    | R01_cb18409_c150/flp0/498    | R01_cb18409_c150/flp0/498    | R01_cb18409_c150/flp0/498    | R01_cb18409_c150/flp0/498    |
| R01_cb5622_c3/flp0/1762      | NA                           | NA                           | NA                           | R01_cb5622_c3/flp0/1762      |
| R01_cb8564_c2518/flp3/2187   | NA                           | R01_cb8564_c2518/flp3/2187   | NA                           | NA                           |
| R01_cb4191_c43/flp0/3513     | NA                           | R01_cb4191_c43/flp0/3513     | NA                           | NA                           |
| R01_cb13532_c2/flp3/1066     | R01_cb13532_c2/flp3/1066     | NA                           | R01_cb13532_c2/flp3/1066     | R01_cb13532_c2/flp3/1066     |
| R01_cb11017_c2/flp0/823      | NA                           | NA                           | R01_cb11017_c2/flp0/823      | R01_cb11017_c2/flp0/823      |
| R01_cb17430_c1/flp0/1790     | R01_cb17430_c1/flp0/1790     | R01_cb17430_c1/flp0/1790     | R01_cb17430_c1/flp0/1790     | R01_cb17430_c1/flp0/1790     |
| R01_cb9207_c0/flp0/2153      | NA                           | NA                           | NA                           | R01_cb9207_c0/flp0/2153      |
| R01_cb580_c0/flp0/4754       | NA                           | R01_cb580_c0/flp0/4754       | NA                           | NA                           |
| R01_cb5533_c18/f2p0/3079     | R01_cb5533_c18/f2p0/3079     | R01_cb5533_c18/f2p0/3079     | R01_cb5533_c18/f2p0/3079     | R01_cb5533_c18/f2p0/3079     |
| R01_cb12148_c13/flp0/797     | NA                           | NA                           | NA                           | R01_cb12148_c13/flp0/797     |
| R01_cb7356_c5/flp0/2091      | NA                           | NA                           | NA                           | R01_cb7356_c5/flp0/2091      |
| R01_cb9932_c7/f9p0/623       | NA                           | R01_cb9932_c7/f9p0/623       | R01_cb9932_c7/f9p0/623       | R01_cb9932_c7/f9p0/623       |
| R01_cb8564_c23560/flp0/2533  | NA                           | R01_cb8564_c23560/flp0/2533  | NA                           | R01_cb8564_c23560/flp0/2533  |
| R01_cb8564_c125538/flp0/2703 | R01_cb8564_c125538/flp0/2703 | R01_cb8564_c125538/flp0/2703 | R01_cb8564_c125538/flp0/2703 | R01_cb8564_c125538/flp0/2703 |
| R01_cb8564_c109164/f5p0/2121 | R01_cb8564_c109164/f5p0/2121 | R01_cb8564_c109164/f5p0/2121 | R01_cb8564_c109164/f5p0/2121 | NA                           |
| R01_cb8564_c3040/flp0/2523   | NA                           | R01_cb8564_c3040/flp0/2523   | R01_cb8564_c3040/flp0/2523   | NA                           |
| R01_cb14092_c1/flp0/1038     | NA                           | NA                           | NA                           | R01_cb14092_c1/flp0/1038     |
| R01_cb8031_c2/f2p0/1878      | NA                           | NA                           | R01_cb8031_c2/f2p0/1878      | NA                           |
| R01_cb8564_c81895/flp0/2889  | NA                           | R01_cb8564_c81895/flp0/2889  | R01_cb8564_c81895/flp0/2889  | NA                           |
| R01_cb10948_c5/flp0/3487     | NA                           | NA                           | NA                           | R01_cb10948_c5/flp0/3487     |

|                              |                            |                              |                              |                              |
|------------------------------|----------------------------|------------------------------|------------------------------|------------------------------|
| R01_cb6148_c1/flp0/2678      | NA                         | R01_cb6148_c1/flp0/2678      | NA                           | NA                           |
| R01_cb11213_c2/flp0/470      | R01_cb11213_c2/flp0/470    | R01_cb11213_c2/flp0/470      | NA                           | NA                           |
| R01_cb13178_c2/f5p0/545      | NA                         | R01_cb13178_c2/f5p0/545      | NA                           | NA                           |
| R01_cb10458_c7/flp1/1759     | NA                         | NA                           | NA                           | R01_cb10458_c7/flp1/1759     |
| R01_cb6204_c15/flp0/2717     | NA                         | NA                           | NA                           | R01_cb6204_c15/flp0/2717     |
| R01_cb4381_c4/flp0/3153      | NA                         | R01_cb4381_c4/flp0/3153      | NA                           | NA                           |
| R01_cb18456_c5295/flp2/806   | NA                         | R01_cb18456_c5295/flp2/806   | NA                           | NA                           |
| R01_cb10054_c29/flp0/1317    | NA                         | R01_cb10054_c29/flp0/1317    | NA                           | NA                           |
| R01_cb13654_c0/f3p1/1096     | NA                         | NA                           | NA                           | R01_cb13654_c0/f3p1/1096     |
| R01_cb8564_c4627/flp0/3317   | NA                         | R01_cb8564_c4627/flp0/3317   | R01_cb8564_c4627/flp0/3317   | R01_cb8564_c4627/flp0/3317   |
| R01_cb11147_c4/flp0/624      | NA                         | NA                           | NA                           | R01_cb11147_c4/flp0/624      |
| R01_cb15089_c1/flp0/444      | R01_cb15089_c1/flp0/444    | R01_cb15089_c1/flp0/444      | R01_cb15089_c1/flp0/444      | R01_cb15089_c1/flp0/444      |
| R01_cb8564_c24150/flp1/3249  | NA                         | NA                           | NA                           | R01_cb8564_c24150/flp1/3249  |
| R01_cb10795_c2/flp0/1560     | NA                         | NA                           | NA                           | R01_cb10795_c2/flp0/1560     |
| R01_cb8564_c116875/f2p0/2610 | NA                         | R01_cb8564_c116875/f2p0/2610 | R01_cb8564_c116875/f2p0/2610 | R01_cb8564_c116875/f2p0/2610 |
| R01_cb1961_c1/f2p0/2344      | NA                         | R01_cb1961_c1/f2p0/2344      | NA                           | NA                           |
| R01_cb2836_c14/flp1/2537     | NA                         | NA                           | NA                           | R01_cb2836_c14/flp1/2537     |
| R01_cb10107_c0/f4p0/1573     | NA                         | NA                           | NA                           | R01_cb10107_c0/f4p0/1573     |
| R01_cb9750_c11/flp0/1846     | NA                         | NA                           | NA                           | R01_cb9750_c11/flp0/1846     |
| R01_cb8564_c35805/flp0/3489  | NA                         | R01_cb8564_c35805/flp0/3489  | NA                           | R01_cb8564_c35805/flp0/3489  |
| R01_cb16452_c13/flp0/533     | R01_cb16452_c13/flp0/533   | R01_cb16452_c13/flp0/533     | R01_cb16452_c13/flp0/533     | R01_cb16452_c13/flp0/533     |
| R01_cb11017_c4/flp0/726      | NA                         | NA                           | R01_cb11017_c4/flp0/726      | R01_cb11017_c4/flp0/726      |
| R01_cb18456_c5430/flp3/652   | R01_cb18456_c5430/flp3/652 | R01_cb18456_c5430/flp3/652   | R01_cb18456_c5430/flp3/652   | R01_cb18456_c5430/flp3/652   |
| R01_cb18004_c0/f2p0/574      | NA                         | R01_cb18004_c0/f2p0/574      | NA                           | R01_cb18004_c0/f2p0/574      |
| R01_cb658_c8/flp0/2734       | NA                         | NA                           | NA                           | R01_cb658_c8/flp0/2734       |

|                             |                            |                             |                             |                             |
|-----------------------------|----------------------------|-----------------------------|-----------------------------|-----------------------------|
| R01_cb8503_c6/flp0/330      | R01_cb8503_c6/flp0/330     | R01_cb8503_c6/flp0/330      | R01_cb8503_c6/flp0/330      | R01_cb8503_c6/flp0/330      |
| R01_cb8564_c77553/f2p0/1972 | NA                         | R01_cb8564_c77553/f2p0/1972 | R01_cb8564_c77553/f2p0/1972 | R01_cb8564_c77553/f2p0/1972 |
| R01_cb5873_c2/flp0/2402     | NA                         | R01_cb5873_c2/flp0/2402     | NA                          | NA                          |
| R01_cb7023_c7/flp0/1690     | NA                         | R01_cb7023_c7/flp0/1690     | R01_cb7023_c7/flp0/1690     | R01_cb7023_c7/flp0/1690     |
| R01_cb13651_c31/flp0/1464   | NA                         | R01_cb13651_c31/flp0/1464   | NA                          | NA                          |
| R01_cb16564_c5/flp0/758     | R01_cb16564_c5/flp0/758    | R01_cb16564_c5/flp0/758     | R01_cb16564_c5/flp0/758     | R01_cb16564_c5/flp0/758     |
| R01_cb5736_c11/flp2/5702    | NA                         | NA                          | NA                          | R01_cb5736_c11/flp2/5702    |
| R01_cb2710_c9/flp0/2880     | NA                         | NA                          | NA                          | R01_cb2710_c9/flp0/2880     |
| R01_cb18409_c65/flp0/542    | R01_cb18409_c65/flp0/542   | R01_cb18409_c65/flp0/542    | R01_cb18409_c65/flp0/542    | R01_cb18409_c65/flp0/542    |
| R01_cb14904_c0/flp0/1239    | NA                         | NA                          | NA                          | R01_cb14904_c0/flp0/1239    |
| R01_cb16558_c0/flp0/1650    | R01_cb16558_c0/flp0/1650   | R01_cb16558_c0/flp0/1650    | R01_cb16558_c0/flp0/1650    | R01_cb16558_c0/flp0/1650    |
| R01_cb8564_c3744/f3p1/2994  | R01_cb8564_c3744/f3p1/2994 | R01_cb8564_c3744/f3p1/2994  | R01_cb8564_c3744/f3p1/2994  | R01_cb8564_c3744/f3p1/2994  |
| R01_cb8564_c77191/flp0/3234 | NA                         | R01_cb8564_c77191/flp0/3234 | R01_cb8564_c77191/flp0/3234 | NA                          |
| R01_cb2826_c3/flp0/3798     | NA                         | R01_cb2826_c3/flp0/3798     | NA                          | R01_cb2826_c3/flp0/3798     |
| R01_cb639_c3/flp0/3003      | NA                         | NA                          | NA                          | R01_cb639_c3/flp0/3003      |
| R01_cb14278_c9/flp0/5606    | R01_cb14278_c9/flp0/5606   | R01_cb14278_c9/flp0/5606    | NA                          | NA                          |
| R01_cb2082_c21/flp0/2561    | NA                         | NA                          | NA                          | R01_cb2082_c21/flp0/2561    |
| R01_cb15326_c3/flp1/1861    | NA                         | R01_cb15326_c3/flp1/1861    | R01_cb15326_c3/flp1/1861    | R01_cb15326_c3/flp1/1861    |
| R01_cb14720_c2/flp0/575     | NA                         | NA                          | NA                          | R01_cb14720_c2/flp0/575     |
| R01_cb10873_c7/f5p0/1367    | NA                         | NA                          | NA                          | R01_cb10873_c7/f5p0/1367    |
| R01_cb7659_c0/f2p0/2555     | NA                         | R01_cb7659_c0/f2p0/2555     | R01_cb7659_c0/f2p0/2555     | R01_cb7659_c0/f2p0/2555     |
| R01_cb7528_c5/flp0/4606     | NA                         | R01_cb7528_c5/flp0/4606     | NA                          | NA                          |
| R01_cb8564_c4495/flp1/2391  | NA                         | R01_cb8564_c4495/flp1/2391  | R01_cb8564_c4495/flp1/2391  | R01_cb8564_c4495/flp1/2391  |
| R01_cb13771_c2/f2p0/1265    | NA                         | R01_cb13771_c2/f2p0/1265    | R01_cb13771_c2/f2p0/1265    | R01_cb13771_c2/f2p0/1265    |
| R01_cb10641_c1/flp0/1966    | NA                         | NA                          | NA                          | R01_cb10641_c1/flp0/1966    |
| R01_cb6608_c7/flp0/2631     | NA                         | NA                          | NA                          | R01_cb6608_c7/flp0/2631     |



|                             |                           |                             |                           |                             |
|-----------------------------|---------------------------|-----------------------------|---------------------------|-----------------------------|
| R01_cb16645_c31/flp0/1069   | R01_cb16645_c31/flp0/1069 | R01_cb16645_c31/flp0/1069   | R01_cb16645_c31/flp0/1069 | R01_cb16645_c31/flp0/1069   |
| R01_cb8564_c86878/flp3/3516 | NA                        | R01_cb8564_c86878/flp3/3516 | NA                        | R01_cb8564_c86878/flp3/3516 |
| R01_cb10828_c2/flp0/2432    | NA                        | R01_cb10828_c2/flp0/2432    | NA                        | R01_cb10828_c2/flp0/2432    |
| R01_cb14247_c1/flp0/1563    | NA                        | R01_cb14247_c1/flp0/1563    | NA                        | NA                          |
| R01_cb3863_c7/flp1/3404     | NA                        | NA                          | NA                        | R01_cb3863_c7/flp1/3404     |
| R01_cb8564_c21456/flp0/2826 | NA                        | R01_cb8564_c21456/flp0/2826 | NA                        | NA                          |
| R01_cb289_c18/flp0/2079     | NA                        | NA                          | NA                        | R01_cb289_c18/flp0/2079     |
| R01_cb3478_c0/f3p0/526      | R01_cb3478_c0/f3p0/526    | R01_cb3478_c0/f3p0/526      | R01_cb3478_c0/f3p0/526    | R01_cb3478_c0/f3p0/526      |
| R01_cb18708_c0/flp0/7035    | NA                        | R01_cb18708_c0/flp0/7035    | NA                        | NA                          |
| R01_cb12932_c2/flp0/993     | NA                        | R01_cb12932_c2/flp0/993     | NA                        | NA                          |
| R01_cb18611_c1/flp0/4508    | NA                        | R01_cb18611_c1/flp0/4508    | R01_cb18611_c1/flp0/4508  | NA                          |
| R01_cb10015_c159/flp0/2408  | NA                        | R01_cb10015_c159/flp0/2408  | NA                        | NA                          |
| R01_cb1077_c26/flp0/2821    | NA                        | NA                          | NA                        | R01_cb1077_c26/flp0/2821    |
| R01_cb3228_c4/flp0/4440     | NA                        | R01_cb3228_c4/flp0/4440     | NA                        | NA                          |
| R01_cb8564_c9393/f4p0/4187  | NA                        | NA                          | NA                        | R01_cb8564_c9393/f4p0/4187  |
| R01_cb12421_c17/f2p0/715    | NA                        | R01_cb12421_c17/f2p0/715    | NA                        | NA                          |
| R01_cb18456_c3390/flp1/1027 | NA                        | R01_cb18456_c3390/flp1/1027 | NA                        | NA                          |
| R01_cb18456_c7595/flp0/1521 | NA                        | R01_cb18456_c7595/flp0/1521 | NA                        | R01_cb18456_c7595/flp0/1521 |
| R01_cb2648_c13/flp0/2771    | NA                        | NA                          | NA                        | R01_cb2648_c13/flp0/2771    |
| R01_cb5983_c0/f4p1/881      | NA                        | NA                          | NA                        | R01_cb5983_c0/f4p1/881      |
| R01_cb3962_c1/flp0/3111     | NA                        | R01_cb3962_c1/flp0/3111     | R01_cb3962_c1/flp0/3111   | R01_cb3962_c1/flp0/3111     |
| R01_cb7268_c1/flp0/2659     | NA                        | NA                          | R01_cb7268_c1/flp0/2659   | NA                          |
| R01_cb7087_c5/flp0/2262     | NA                        | NA                          | NA                        | R01_cb7087_c5/flp0/2262     |
| R01_cb383_c36/flp0/1410     | NA                        | R01_cb383_c36/flp0/1410     | NA                        | R01_cb383_c36/flp0/1410     |
| R01_cb4340_c2/flp0/1819     | NA                        | R01_cb4340_c2/flp0/1819     | R01_cb4340_c2/flp0/1819   | R01_cb4340_c2/flp0/1819     |
| R01_cb17740_c1/flp0/1364    | NA                        | NA                          | NA                        | R01_cb17740_c1/flp0/1364    |

|                                  |    |                                  |                             |                             |
|----------------------------------|----|----------------------------------|-----------------------------|-----------------------------|
| R01_cb2445_c5/f2p0/3324          | NA | NA                               | NA                          | R01_cb2445_c5/f2p0/3324     |
| R01_cb18456_c1380/flp3/689       | NA | R01_cb18456_c1380/flp3/689       | NA                          | NA                          |
| R01_cb2716_c0/flp0/3829          | NA | R01_cb2716_c0/flp0/3829          | NA                          | NA                          |
| R01_cb10920_c10/flp0/1435        | NA | R01_cb10920_c10/flp0/1435        | NA                          | NA                          |
| R01_cb8809_c16/flp3/2364         | NA | NA                               | NA                          | R01_cb8809_c16/flp3/2364    |
| R01_cb10352_c15/flp1/1494        | NA | R01_cb10352_c15/flp1/1494        | NA                          | NA                          |
| R01_cb2431_c3/flp0/4221          | NA | NA                               | NA                          | R01_cb2431_c3/flp0/4221     |
| R01_cb18181_c0/flp0/1267         | NA | NA                               | NA                          | R01_cb18181_c0/flp0/1267    |
| R01_cb16784_c2/flp0/1591         | NA | NA                               | NA                          | R01_cb16784_c2/flp0/1591    |
| R01_cb18480_c2/flp0/831          | NA | R01_cb18480_c2/flp0/831          | NA                          | R01_cb18480_c2/flp0/831     |
| R01_cb8564_c124750/flp0/217<br>6 | NA | R01_cb8564_c124750/flp0/217<br>6 | NA                          | NA                          |
| R01_cb15573_c0/flp0/1344         | NA | R01_cb15573_c0/flp0/1344         | NA                          | NA                          |
| R01_cb8417_c23/flp0/1193         | NA | NA                               | NA                          | R01_cb8417_c23/flp0/1193    |
| R01_cb8564_c18910/flp2/2764      | NA | NA                               | NA                          | R01_cb8564_c18910/flp2/2764 |
| R01_cb8564_c39692/flp0/4120      | NA | R01_cb8564_c39692/flp0/4120      | NA                          | NA                          |
| R01_cb9658_c4/flp0/2058          | NA | NA                               | NA                          | R01_cb9658_c4/flp0/2058     |
| R01_cb14835_c10/flp1/917         | NA | R01_cb14835_c10/flp1/917         | NA                          | R01_cb14835_c10/flp1/917    |
| R01_cb15233_c1/f3p0/869          | NA | NA                               | R01_cb15233_c1/f3p0/869     | R01_cb15233_c1/f3p0/869     |
| R01_cb8564_c41187/flp0/2814      | NA | NA                               | R01_cb8564_c41187/flp0/2814 | R01_cb8564_c41187/flp0/2814 |
| R01_cb1813_c44/f9p0/2520         | NA | NA                               | NA                          | R01_cb1813_c44/f9p0/2520    |
| R01_cb3941_c68/flp0/3496         | NA | R01_cb3941_c68/flp0/3496         | NA                          | NA                          |
| R01_cb8441_c5/flp0/2025          | NA | R01_cb8441_c5/flp0/2025          | NA                          | R01_cb8441_c5/flp0/2025     |
| R01_cb11017_c3/flp0/865          | NA | R01_cb11017_c3/flp0/865          | R01_cb11017_c3/flp0/865     | R01_cb11017_c3/flp0/865     |
| R01_cb8564_c21600/flp2/3364      | NA | R01_cb8564_c21600/flp2/3364      | NA                          | R01_cb8564_c21600/flp2/3364 |
| R01_cb9410_c0/flp1/2063          | NA | NA                               | NA                          | R01_cb9410_c0/flp1/2063     |

|                             |                           |                             |                             |                             |
|-----------------------------|---------------------------|-----------------------------|-----------------------------|-----------------------------|
| R01_cb625_c4/flp2/3185      | NA                        | NA                          | NA                          | R01_cb625_c4/flp2/3185      |
| R01_cb5774_c2/flp0/391      | NA                        | R01_cb5774_c2/flp0/391      | NA                          | R01_cb5774_c2/flp0/391      |
| R01_cb10767_c1/flp0/3410    | NA                        | NA                          | NA                          | R01_cb10767_c1/flp0/3410    |
| R01_cb5725_c40/flp0/2259    | NA                        | NA                          | NA                          | R01_cb5725_c40/flp0/2259    |
| R01_cb11401_c1/flp1/881     | NA                        | NA                          | R01_cb11401_c1/flp1/881     | R01_cb11401_c1/flp1/881     |
| R01_cb9797_c136/flp0/869    | NA                        | R01_cb9797_c136/flp0/869    | NA                          | NA                          |
| R01_cb5581_c4/flp0/2101     | NA                        | R01_cb5581_c4/flp0/2101     | NA                          | NA                          |
| R01_cb1508_c3/flp0/4285     | NA                        | R01_cb1508_c3/flp0/4285     | NA                          | R01_cb1508_c3/flp0/4285     |
| R01_cb12827_c0/f2p0/1391    | NA                        | NA                          | NA                          | R01_cb12827_c0/f2p0/1391    |
| R01_cb18526_c13/flp0/1830   | NA                        | R01_cb18526_c13/flp0/1830   | R01_cb18526_c13/flp0/1830   | R01_cb18526_c13/flp0/1830   |
| R01_cb8564_c880/f2p0/2557   | R01_cb8564_c880/f2p0/2557 | R01_cb8564_c880/f2p0/2557   | R01_cb8564_c880/f2p0/2557   | R01_cb8564_c880/f2p0/2557   |
| R01_cb15102_c1/flp0/890     | NA                        | NA                          | NA                          | R01_cb15102_c1/flp0/890     |
| R01_cb9609_c2/flp1/1941     | NA                        | NA                          | NA                          | R01_cb9609_c2/flp1/1941     |
| R01_cb8564_c92238/flp0/2090 | NA                        | NA                          | NA                          | R01_cb8564_c92238/flp0/2090 |
| R01_cb18456_c7437/flp0/1496 | NA                        | R01_cb18456_c7437/flp0/1496 | R01_cb18456_c7437/flp0/1496 | R01_cb18456_c7437/flp0/1496 |
| R01_cb16437_c2/flp0/418     | R01_cb16437_c2/flp0/418   | R01_cb16437_c2/flp0/418     | NA                          | NA                          |
| R01_cb4293_c14/flp0/3805    | NA                        | R01_cb4293_c14/flp0/3805    | NA                          | NA                          |
| R01_cb1077_c7/f3p1/1886     | NA                        | NA                          | NA                          | R01_cb1077_c7/f3p1/1886     |
| R01_cb11107_c3/flp0/6000    | NA                        | R01_cb11107_c3/flp0/6000    | NA                          | NA                          |
| R01_cb8564_c73676/flp0/2280 | NA                        | NA                          | NA                          | R01_cb8564_c73676/flp0/2280 |
| R01_cb13970_c2/f2p0/998     | NA                        | NA                          | NA                          | R01_cb13970_c2/f2p0/998     |
| R01_cb13602_c9/f2p0/1811    | NA                        | NA                          | NA                          | R01_cb13602_c9/f2p0/1811    |
| R01_cb9063_c8/flp0/1064     | R01_cb9063_c8/flp0/1064   | R01_cb9063_c8/flp0/1064     | NA                          | R01_cb9063_c8/flp0/1064     |
| R01_cb8285_c0/flp0/2410     | NA                        | NA                          | NA                          | R01_cb8285_c0/flp0/2410     |
| R01_cb8564_c18659/flp0/2786 | NA                        | R01_cb8564_c18659/flp0/2786 | NA                          | R01_cb8564_c18659/flp0/2786 |
| R01_cb4250_c1/flp0/2776     | R01_cb4250_c1/flp0/2776   | R01_cb4250_c1/flp0/2776     | R01_cb4250_c1/flp0/2776     | NA                          |

|                             |                                  |                             |                             |                             |
|-----------------------------|----------------------------------|-----------------------------|-----------------------------|-----------------------------|
| R01_cb8564_c73895/f1p0/4051 | R01_cb8564_c73895/f1p0/4051<br>1 | R01_cb8564_c73895/f1p0/4051 | NA                          | NA                          |
| R01_cb15564_c0/f2p0/817     | NA                               | R01_cb15564_c0/f2p0/817     | R01_cb15564_c0/f2p0/817     | R01_cb15564_c0/f2p0/817     |
| R01_cb1297_c27/f2p0/4120    | NA                               | NA                          | NA                          | R01_cb1297_c27/f2p0/4120    |
| R01_cb7055_c57/f1p1/2206    | NA                               | R01_cb7055_c57/f1p1/2206    | NA                          | NA                          |
| R01_cb2691_c5/f1p0/1612     | NA                               | R01_cb2691_c5/f1p0/1612     | NA                          | R01_cb2691_c5/f1p0/1612     |
| R01_cb12897_c1/f2p0/623     | R01_cb12897_c1/f2p0/623          | R01_cb12897_c1/f2p0/623     | NA                          | NA                          |
| R01_cb3046_c12/f1p0/2338    | NA                               | NA                          | NA                          | R01_cb3046_c12/f1p0/2338    |
| R01_cb17091_c0/f2p0/1653    | R01_cb17091_c0/f2p0/1653         | R01_cb17091_c0/f2p0/1653    | R01_cb17091_c0/f2p0/1653    | R01_cb17091_c0/f2p0/1653    |
| R01_cb4702_c9/f1p0/2908     | NA                               | R01_cb4702_c9/f1p0/2908     | R01_cb4702_c9/f1p0/2908     | R01_cb4702_c9/f1p0/2908     |
| R01_cb2033_c16/f1p0/2147    | NA                               | NA                          | NA                          | R01_cb2033_c16/f1p0/2147    |
| R01_cb8564_c89244/f1p0/2755 | NA                               | R01_cb8564_c89244/f1p0/2755 | R01_cb8564_c89244/f1p0/2755 | R01_cb8564_c89244/f1p0/2755 |
| R01_cb8564_c70887/f1p0/2052 | NA                               | R01_cb8564_c70887/f1p0/2052 | NA                          | NA                          |
| R01_cb14502_c21/f1p0/1607   | R01_cb14502_c21/f1p0/1607        | R01_cb14502_c21/f1p0/1607   | R01_cb14502_c21/f1p0/1607   | R01_cb14502_c21/f1p0/1607   |
| R01_cb7976_c1/f2p0/1868     | NA                               | R01_cb7976_c1/f2p0/1868     | NA                          | NA                          |
| R01_cb16455_c2/f1p0/533     | R01_cb16455_c2/f1p0/533          | R01_cb16455_c2/f1p0/533     | R01_cb16455_c2/f1p0/533     | R01_cb16455_c2/f1p0/533     |
| R01_cb7836_c3/f1p0/1935     | NA                               | NA                          | NA                          | R01_cb7836_c3/f1p0/1935     |
| R01_cb285_c18/f1p0/2884     | NA                               | R01_cb285_c18/f1p0/2884     | NA                          | NA                          |
| R01_cb18409_c87/f1p0/374    | R01_cb18409_c87/f1p0/374         | R01_cb18409_c87/f1p0/374    | R01_cb18409_c87/f1p0/374    | R01_cb18409_c87/f1p0/374    |
| R01_cb2192_c0/f1p0/4018     | NA                               | NA                          | NA                          | R01_cb2192_c0/f1p0/4018     |
| R01_cb14125_c55/f1p2/681    | NA                               | R01_cb14125_c55/f1p2/681    | R01_cb14125_c55/f1p2/681    | NA                          |
| R01_cb8564_c76807/f1p0/2283 | NA                               | NA                          | NA                          | R01_cb8564_c76807/f1p0/2283 |
| R01_cb14524_c4/f1p0/1330    | NA                               | NA                          | NA                          | R01_cb14524_c4/f1p0/1330    |
| R01_cb18386_c8/f1p0/1021    | R01_cb18386_c8/f1p0/1021         | R01_cb18386_c8/f1p0/1021    | NA                          | R01_cb18386_c8/f1p0/1021    |
| R01_cb7234_c10/f1p1/2606    | NA                               | R01_cb7234_c10/f1p1/2606    | NA                          | NA                          |
| R01_cb16875_c3/f1p0/900     | NA                               | NA                          | NA                          | R01_cb16875_c3/f1p0/900     |

|                             |                            |                             |                             |                             |
|-----------------------------|----------------------------|-----------------------------|-----------------------------|-----------------------------|
| R01_cb8564_c89084/f2p0/2474 | NA                         | NA                          | NA                          | R01_cb8564_c89084/f2p0/2474 |
| R01_cb18490_c1/f1p0/900     | NA                         | NA                          | R01_cb18490_c1/f1p0/900     | R01_cb18490_c1/f1p0/900     |
| R01_cb11481_c3/f1p0/615     | NA                         | R01_cb11481_c3/f1p0/615     | NA                          | R01_cb11481_c3/f1p0/615     |
| R01_cb12883_c2/f2p0/803     | R01_cb12883_c2/f2p0/803    | R01_cb12883_c2/f2p0/803     | NA                          | R01_cb12883_c2/f2p0/803     |
| R01_cb18456_c7175/f1p0/506  | R01_cb18456_c7175/f1p0/506 | R01_cb18456_c7175/f1p0/506  | R01_cb18456_c7175/f1p0/506  | R01_cb18456_c7175/f1p0/506  |
| R01_cb16061_c2/f1p0/557     | NA                         | R01_cb16061_c2/f1p0/557     | NA                          | NA                          |
| R01_cb6456_c0/f2p0/2553     | R01_cb6456_c0/f2p0/2553    | R01_cb6456_c0/f2p0/2553     | NA                          | R01_cb6456_c0/f2p0/2553     |
| R01_cb1425_c3/f1p0/2584     | NA                         | NA                          | NA                          | R01_cb1425_c3/f1p0/2584     |
| R01_cb454_c12/f1p0/4005     | NA                         | R01_cb454_c12/f1p0/4005     | NA                          | R01_cb454_c12/f1p0/4005     |
| R01_cb4532_c4/f1p0/2791     | NA                         | R01_cb4532_c4/f1p0/2791     | NA                          | NA                          |
| R01_cb8564_c79596/f1p0/4895 | NA                         | R01_cb8564_c79596/f1p0/4895 | NA                          | NA                          |
| R01_cb8564_c51637/f1p7/3093 | NA                         | R01_cb8564_c51637/f1p7/3093 | NA                          | NA                          |
| R01_cb8564_c3325/f1p0/2023  | NA                         | R01_cb8564_c3325/f1p0/2023  | NA                          | NA                          |
| R01_cb2219_c6/f1p2/1909     | NA                         | R01_cb2219_c6/f1p2/1909     | NA                          | NA                          |
| R01_cb7810_c2/f1p0/1116     | R01_cb7810_c2/f1p0/1116    | R01_cb7810_c2/f1p0/1116     | R01_cb7810_c2/f1p0/1116     | NA                          |
| R01_cb2936_c7/f1p0/2430     | NA                         | R01_cb2936_c7/f1p0/2430     | NA                          | NA                          |
| R01_cb10129_c2/f1p0/3753    | NA                         | R01_cb10129_c2/f1p0/3753    | NA                          | NA                          |
| R01_cb8564_c89737/f1p0/3593 | NA                         | R01_cb8564_c89737/f1p0/3593 | NA                          | NA                          |
| R01_cb8215_c4/f1p0/2103     | NA                         | R01_cb8215_c4/f1p0/2103     | NA                          | NA                          |
| R01_cb9540_c0/f1p0/2047     | NA                         | NA                          | NA                          | R01_cb9540_c0/f1p0/2047     |
| R01_cb6118_c2/f1p0/2944     | NA                         | R01_cb6118_c2/f1p0/2944     | R01_cb6118_c2/f1p0/2944     | NA                          |
| R01_cb12972_c28/f1p0/932    | NA                         | R01_cb12972_c28/f1p0/932    | R01_cb12972_c28/f1p0/932    | R01_cb12972_c28/f1p0/932    |
| R01_cb1885_c1/f2p0/2694     | NA                         | R01_cb1885_c1/f2p0/2694     | NA                          | NA                          |
| R01_cb8564_c119154/f1p0/218 | NA                         | NA                          | R01_cb8564_c119154/f1p0/218 | NA                          |
| 7                           |                            |                             | 7                           |                             |
| R01_cb15805_c1/f1p0/628     | NA                         | NA                          | NA                          | R01_cb15805_c1/f1p0/628     |

|                             |                             |                             |                             |                             |
|-----------------------------|-----------------------------|-----------------------------|-----------------------------|-----------------------------|
| R01_cb8564_c82516/flp0/3019 | NA                          | R01_cb8564_c82516/flp0/3019 | NA                          | NA                          |
| R01_cb7645_c5/flp0/884      | R01_cb7645_c5/flp0/884      | NA                          | R01_cb7645_c5/flp0/884      | R01_cb7645_c5/flp0/884      |
| R01_cb8564_c85733/f4p1/4182 | NA                          | NA                          | NA                          | R01_cb8564_c85733/f4p1/4182 |
| R01_cb11134_c2/flp0/892     | NA                          | R01_cb11134_c2/flp0/892     | R01_cb11134_c2/flp0/892     | R01_cb11134_c2/flp0/892     |
| R01_cb2907_c11/flp0/2418    | NA                          | NA                          | NA                          | R01_cb2907_c11/flp0/2418    |
| R01_cb16177_c2/flp0/711     | NA                          | NA                          | NA                          | R01_cb16177_c2/flp0/711     |
| R01_cb11397_c4/flp0/1908    | NA                          | R01_cb11397_c4/flp0/1908    | NA                          | NA                          |
| R01_cb12462_c40/flp0/769    | NA                          | R01_cb12462_c40/flp0/769    | NA                          | NA                          |
| R01_cb10769_c3/f6p0/1025    | NA                          | NA                          | NA                          | R01_cb10769_c3/f6p0/1025    |
| R01_cb9750_c3/flp0/1926     | NA                          | NA                          | NA                          | R01_cb9750_c3/flp0/1926     |
| R01_cb6704_c2/flp0/2788     | NA                          | R01_cb6704_c2/flp0/2788     | NA                          | NA                          |
| R01_cb14293_c1/f2p0/903     | NA                          | R01_cb14293_c1/f2p0/903     | NA                          | NA                          |
| R01_cb3483_c19/flp0/2872    | NA                          | NA                          | NA                          | R01_cb3483_c19/flp0/2872    |
| R01_cb17683_c0/f2p0/1527    | NA                          | NA                          | NA                          | R01_cb17683_c0/f2p0/1527    |
| R01_cb8564_c87865/flp0/3752 | NA                          | R01_cb8564_c87865/flp0/3752 | NA                          | NA                          |
| R01_cb4494_c3/flp0/2950     | NA                          | R01_cb4494_c3/flp0/2950     | NA                          | NA                          |
| R01_cb16242_c12/flp1/1019   | NA                          | R01_cb16242_c12/flp1/1019   | NA                          | NA                          |
| R01_cb17251_c3/flp0/767     | NA                          | R01_cb17251_c3/flp0/767     | NA                          | NA                          |
| R01_cb8564_c46392/flp0/2511 | R01_cb8564_c46392/flp0/2511 | R01_cb8564_c46392/flp0/2511 | R01_cb8564_c46392/flp0/2511 | R01_cb8564_c46392/flp0/2511 |
| R01_cb18456_c7432/flp0/774  | NA                          | R01_cb18456_c7432/flp0/774  | R01_cb18456_c7432/flp0/774  | R01_cb18456_c7432/flp0/774  |
| R01_cb8564_c1913/flp0/2470  | R01_cb8564_c1913/flp0/2470  | R01_cb8564_c1913/flp0/2470  | NA                          | R01_cb8564_c1913/flp0/2470  |
| R01_cb8564_c115209/flp2/242 | NA                          | NA                          | NA                          | R01_cb8564_c115209/flp2/242 |
| R01_cb18456_c5351/flp3/831  | NA                          | R01_cb18456_c5351/flp3/831  | NA                          | NA                          |
| R01_cb6931_c0/f3p0/1780     | NA                          | NA                          | NA                          | R01_cb6931_c0/f3p0/1780     |

|                                  |                                   |                                  |                                  |                                  |
|----------------------------------|-----------------------------------|----------------------------------|----------------------------------|----------------------------------|
| R01_cb3341_c7/flp0/2281          | NA                                | R01_cb3341_c7/flp0/2281          | NA                               | NA                               |
| R01_cb119_c29/flp0/1939          | NA                                | NA                               | NA                               | R01_cb119_c29/flp0/1939          |
| R01_cb8564_c116479/f2p1/350<br>3 | R01_cb8564_c116479/f2p1/350<br>03 | R01_cb8564_c116479/f2p1/350<br>3 | R01_cb8564_c116479/f2p1/350<br>3 | R01_cb8564_c116479/f2p1/350<br>3 |
| R01_cb8564_c54312/flp0/2789      | R01_cb8564_c54312/flp0/2789<br>9  | R01_cb8564_c54312/flp0/2789      | NA                               | R01_cb8564_c54312/flp0/2789      |
| R01_cb2926_c31/flp0/797          | NA                                | NA                               | NA                               | R01_cb2926_c31/flp0/797          |
| R01_cb14223_c3/flp0/886          | NA                                | NA                               | R01_cb14223_c3/flp0/886          | R01_cb14223_c3/flp0/886          |
| R01_cb2275_c6/flp0/7298          | NA                                | NA                               | NA                               | R01_cb2275_c6/flp0/7298          |
| R01_cb10623_c2/flp0/2574         | NA                                | R01_cb10623_c2/flp0/2574         | R01_cb10623_c2/flp0/2574         | NA                               |
| R01_cb3888_c10/flp0/2356         | NA                                | R01_cb3888_c10/flp0/2356         | NA                               | NA                               |
| R01_cb14684_c3/flp0/1666         | NA                                | R01_cb14684_c3/flp0/1666         | NA                               | NA                               |
| R01_cb10655_c2/flp0/1974         | R01_cb10655_c2/flp0/1974          | R01_cb10655_c2/flp0/1974         | R01_cb10655_c2/flp0/1974         | R01_cb10655_c2/flp0/1974         |
| R01_cb7057_c3/flp0/4016          | NA                                | NA                               | NA                               | R01_cb7057_c3/flp0/4016          |
| R01_cb11703_c0/flp1/861          | R01_cb11703_c0/flp1/861           | R01_cb11703_c0/flp1/861          | R01_cb11703_c0/flp1/861          | NA                               |
| R01_cb17963_c0/f2p0/680          | R01_cb17963_c0/f2p0/680           | R01_cb17963_c0/f2p0/680          | R01_cb17963_c0/f2p0/680          | R01_cb17963_c0/f2p0/680          |
| R01_cb12897_c2/flp0/623          | R01_cb12897_c2/flp0/623           | R01_cb12897_c2/flp0/623          | NA                               | NA                               |
| R01_cb7687_c6/flp0/2480          | NA                                | NA                               | NA                               | R01_cb7687_c6/flp0/2480          |
| R01_cb8564_c117175/f2p0/243<br>9 | R01_cb8564_c117175/f2p0/243<br>39 | R01_cb8564_c117175/f2p0/243<br>9 | NA                               | R01_cb8564_c117175/f2p0/243<br>9 |
| R01_cb17475_c3/flp0/714          | NA                                | R01_cb17475_c3/flp0/714          | R01_cb17475_c3/flp0/714          | R01_cb17475_c3/flp0/714          |
| R01_cb17103_c3/flp0/1303         | NA                                | NA                               | NA                               | R01_cb17103_c3/flp0/1303         |
| R01_cb2048_c19/f7p0/1989         | NA                                | NA                               | NA                               | R01_cb2048_c19/f7p0/1989         |
| R01_cb10027_c4/f2p4/1653         | NA                                | NA                               | NA                               | R01_cb10027_c4/f2p4/1653         |
| R01_cb12480_c5/flp2/930          | NA                                | R01_cb12480_c5/flp2/930          | R01_cb12480_c5/flp2/930          | R01_cb12480_c5/flp2/930          |
| R01_cb8564_c1648/flp0/3092       | NA                                | R01_cb8564_c1648/flp0/3092       | NA                               | R01_cb8564_c1648/flp0/3092       |

|                              |                             |                              |                              |                             |
|------------------------------|-----------------------------|------------------------------|------------------------------|-----------------------------|
| R01_cb646_c2/flp0/4655       | NA                          | NA                           | NA                           | R01_cb646_c2/flp0/4655      |
| R01_cb18456_c7633/flp0/489   | R01_cb18456_c7633/flp0/489  | R01_cb18456_c7633/flp0/489   | R01_cb18456_c7633/flp0/489   | R01_cb18456_c7633/flp0/489  |
| R01_cb8885_c4/flp0/2736      | NA                          | NA                           | NA                           | R01_cb8885_c4/flp0/2736     |
| R01_cb9373_c5/flp0/661       | R01_cb9373_c5/flp0/661      | R01_cb9373_c5/flp0/661       | NA                           | NA                          |
| R01_cb6990_c3/flp0/2720      | R01_cb6990_c3/flp0/2720     | R01_cb6990_c3/flp0/2720      | NA                           | NA                          |
| R01_cb8564_c77579/flp0/2057  | NA                          | NA                           | NA                           | R01_cb8564_c77579/flp0/2057 |
| R01_cb8564_c114759/flp0/2134 | NA                          | R01_cb8564_c114759/flp0/2134 | R01_cb8564_c114759/flp0/2134 | NA                          |
| R01_cb12644_c5/f5p0/555      | NA                          | R01_cb12644_c5/f5p0/555      | NA                           | NA                          |
| R01_cb16777_c1/flp0/633      | R01_cb16777_c1/flp0/633     | R01_cb16777_c1/flp0/633      | R01_cb16777_c1/flp0/633      | R01_cb16777_c1/flp0/633     |
| R01_cb5507_c1/flp0/2959      | NA                          | R01_cb5507_c1/flp0/2959      | NA                           | NA                          |
| R01_cb6623_c15/flp0/2688     | NA                          | NA                           | NA                           | R01_cb6623_c15/flp0/2688    |
| R01_cb18352_c0/flp0/507      | R01_cb18352_c0/flp0/507     | R01_cb18352_c0/flp0/507      | R01_cb18352_c0/flp0/507      | R01_cb18352_c0/flp0/507     |
| R01_cb2826_c2/f2p0/2665      | NA                          | R01_cb2826_c2/f2p0/2665      | NA                           | NA                          |
| R01_cb8564_c38562/flp0/2020  | NA                          | R01_cb8564_c38562/flp0/2020  | R01_cb8564_c38562/flp0/2020  | R01_cb8564_c38562/flp0/2020 |
| R01_cb4490_c10/flp0/2154     | NA                          | NA                           | NA                           | R01_cb4490_c10/flp0/2154    |
| R01_cb18456_c7239/flp0/340   | R01_cb18456_c7239/flp0/340  | R01_cb18456_c7239/flp0/340   | R01_cb18456_c7239/flp0/340   | R01_cb18456_c7239/flp0/340  |
| R01_cb16844_c0/f4p0/1511     | NA                          | NA                           | NA                           | R01_cb16844_c0/f4p0/1511    |
| R01_cb14070_c1/flp0/1408     | NA                          | R01_cb14070_c1/flp0/1408     | R01_cb14070_c1/flp0/1408     | NA                          |
| R01_cb17184_c1/f2p0/758      | NA                          | R01_cb17184_c1/f2p0/758      | NA                           | NA                          |
| R01_cb2160_c22/flp0/878      | NA                          | R01_cb2160_c22/flp0/878      | R01_cb2160_c22/flp0/878      | R01_cb2160_c22/flp0/878     |
| R01_cb8564_c51823/flp0/3843  | R01_cb8564_c51823/flp0/3843 | R01_cb8564_c51823/flp0/3843  | R01_cb8564_c51823/flp0/3843  | R01_cb8564_c51823/flp0/3843 |
| R01_cb18582_c0/flp0/1650     | NA                          | R01_cb18582_c0/flp0/1650     | NA                           | NA                          |
| R01_cb6406_c68/flp0/5111     | NA                          | R01_cb6406_c68/flp0/5111     | NA                           | R01_cb6406_c68/flp0/5111    |
| R01_cb3500_c25/flp0/3053     | NA                          | NA                           | NA                           | R01_cb3500_c25/flp0/3053    |



|                             |                            |                             |                          |                             |
|-----------------------------|----------------------------|-----------------------------|--------------------------|-----------------------------|
| R01_cb8975_c4/flp0/2062     | NA                         | NA                          | NA                       | R01_cb8975_c4/flp0/2062     |
| R01_cb8564_c69340/f2p0/3851 | NA                         | R01_cb8564_c69340/f2p0/3851 | NA                       | NA                          |
| R01_cb4923_c1/f5p0/2836     | NA                         | NA                          | NA                       | R01_cb4923_c1/f5p0/2836     |
| R01_cb5190_c4/flp1/2412     | NA                         | NA                          | NA                       | R01_cb5190_c4/flp1/2412     |
| R01_cb11441_c0/flp0/842     | R01_cb11441_c0/flp0/842    | R01_cb11441_c0/flp0/842     | R01_cb11441_c0/flp0/842  | R01_cb11441_c0/flp0/842     |
| R01_cb6665_c6/f2p0/956      | R01_cb6665_c6/f2p0/956     | R01_cb6665_c6/f2p0/956      | R01_cb6665_c6/f2p0/956   | R01_cb6665_c6/f2p0/956      |
| R01_cb2154_c5/flp1/4034     | NA                         | R01_cb2154_c5/flp1/4034     | NA                       | NA                          |
| R01_cb15214_c0/f7p0/1843    | NA                         | NA                          | NA                       | R01_cb15214_c0/f7p0/1843    |
| R01_cb4920_c1/flp0/1983     | R01_cb4920_c1/flp0/1983    | R01_cb4920_c1/flp0/1983     | R01_cb4920_c1/flp0/1983  | R01_cb4920_c1/flp0/1983     |
| R01_cb11637_c0/flp0/1510    | NA                         | R01_cb11637_c0/flp0/1510    | NA                       | NA                          |
| R01_cb18456_c4755/flp0/454  | NA                         | R01_cb18456_c4755/flp0/454  | NA                       | R01_cb18456_c4755/flp0/454  |
| R01_cb13289_c9/flp0/1728    | NA                         | R01_cb13289_c9/flp0/1728    | R01_cb13289_c9/flp0/1728 | NA                          |
| R01_cb18456_c6279/flp0/557  | R01_cb18456_c6279/flp0/557 | R01_cb18456_c6279/flp0/557  | NA                       | R01_cb18456_c6279/flp0/557  |
| R01_cb8528_c10/flp0/447     | R01_cb8528_c10/flp0/447    | R01_cb8528_c10/flp0/447     | R01_cb8528_c10/flp0/447  | R01_cb8528_c10/flp0/447     |
| R01_cb709_c3/flp0/2461      | NA                         | NA                          | R01_cb709_c3/flp0/2461   | NA                          |
| R01_cb2445_c17/flp0/2819    | NA                         | NA                          | NA                       | R01_cb2445_c17/flp0/2819    |
| R01_cb14796_c5/f2p0/646     | NA                         | R01_cb14796_c5/f2p0/646     | NA                       | NA                          |
| R01_cb6004_c5/flp1/2116     | NA                         | NA                          | NA                       | R01_cb6004_c5/flp1/2116     |
| R01_cb3872_c1/f2p0/3514     | NA                         | R01_cb3872_c1/f2p0/3514     | R01_cb3872_c1/f2p0/3514  | R01_cb3872_c1/f2p0/3514     |
| R01_cb8564_c76420/flp0/2783 | NA                         | R01_cb8564_c76420/flp0/2783 | NA                       | NA                          |
| R01_cb8564_c10779/flp2/2282 | NA                         | NA                          | NA                       | R01_cb8564_c10779/flp2/2282 |
| R01_cb9241_c3/flp0/1448     | R01_cb9241_c3/flp0/1448    | R01_cb9241_c3/flp0/1448     | NA                       | R01_cb9241_c3/flp0/1448     |
| R01_cb17241_c1/flp0/1516    | NA                         | NA                          | NA                       | R01_cb17241_c1/flp0/1516    |
| R01_cb17756_c1/f3p0/381     | R01_cb17756_c1/f3p0/381    | R01_cb17756_c1/f3p0/381     | R01_cb17756_c1/f3p0/381  | R01_cb17756_c1/f3p0/381     |
| R01_cb8564_c52937/flp0/3075 | NA                         | R01_cb8564_c52937/flp0/3075 | NA                       | R01_cb8564_c52937/flp0/3075 |
| R01_cb17467_c1/flp0/1089    | R01_cb17467_c1/flp0/1089   | R01_cb17467_c1/flp0/1089    | R01_cb17467_c1/flp0/1089 | R01_cb17467_c1/flp0/1089    |

|                              |                             |                             |                             |                              |
|------------------------------|-----------------------------|-----------------------------|-----------------------------|------------------------------|
| R01_cb13842_c0/flp0/1450     | NA                          | R01_cb13842_c0/flp0/1450    | NA                          | NA                           |
| R01_cb8564_c68664/f5p0/2301  | NA                          | R01_cb8564_c68664/f5p0/2301 | R01_cb8564_c68664/f5p0/2301 | R01_cb8564_c68664/f5p0/2301  |
| R01_cb8564_c117101/flp0/2770 | NA                          | NA                          | NA                          | R01_cb8564_c117101/flp0/2770 |
| R01_cb10641_c4/flp1/1619     | NA                          | NA                          | NA                          | R01_cb10641_c4/flp1/1619     |
| R01_cb8564_c15731/flp0/3195  | NA                          | R01_cb8564_c15731/flp0/3195 | NA                          | R01_cb8564_c15731/flp0/3195  |
| R01_cb5911_c2/flp0/1941      | NA                          | NA                          | NA                          | R01_cb5911_c2/flp0/1941      |
| R01_cb12200_c0/flp0/1686     | NA                          | NA                          | NA                          | R01_cb12200_c0/flp0/1686     |
| R01_cb9052_c1/flp0/2217      | NA                          | NA                          | NA                          | R01_cb9052_c1/flp0/2217      |
| R01_cb8564_c78144/flp0/2954  | R01_cb8564_c78144/flp0/2954 | R01_cb8564_c78144/flp0/2954 | R01_cb8564_c78144/flp0/2954 | R01_cb8564_c78144/flp0/2954  |
| R01_cb5159_c4/f2p1/1986      | NA                          | NA                          | NA                          | R01_cb5159_c4/f2p1/1986      |
| R01_cb3750_c35/flp1/2165     | NA                          | NA                          | NA                          | R01_cb3750_c35/flp1/2165     |
| R01_cb3759_c5/flp0/2655      | NA                          | R01_cb3759_c5/flp0/2655     | NA                          | NA                           |
| R01_cb10145_c2/flp0/2311     | NA                          | NA                          | NA                          | R01_cb10145_c2/flp0/2311     |
| R01_cb5550_c19/flp0/3088     | NA                          | R01_cb5550_c19/flp0/3088    | NA                          | NA                           |
| R01_cb3732_c5/f2p0/3545      | NA                          | NA                          | NA                          | R01_cb3732_c5/f2p0/3545      |
| R01_cb13024_c2/flp0/681      | NA                          | NA                          | NA                          | R01_cb13024_c2/flp0/681      |
| R01_cb11953_c3/flp0/380      | R01_cb11953_c3/flp0/380     | R01_cb11953_c3/flp0/380     | R01_cb11953_c3/flp0/380     | R01_cb11953_c3/flp0/380      |
| R01_cb18456_c7248/flp0/1461  | NA                          | R01_cb18456_c7248/flp0/1461 | R01_cb18456_c7248/flp0/1461 | NA                           |
| R01_cb18456_c6986/flp0/1316  | NA                          | R01_cb18456_c6986/flp0/1316 | R01_cb18456_c6986/flp0/1316 | R01_cb18456_c6986/flp0/1316  |
| R01_cb14211_c2/flp0/1530     | NA                          | NA                          | NA                          | R01_cb14211_c2/flp0/1530     |
| R01_cb8564_c86230/flp0/2481  | NA                          | R01_cb8564_c86230/flp0/2481 | NA                          | NA                           |
| R01_cb15436_c1/flp0/799      | NA                          | NA                          | NA                          | R01_cb15436_c1/flp0/799      |
| R01_cb2991_c7/flp0/2926      | NA                          | NA                          | NA                          | R01_cb2991_c7/flp0/2926      |
| R01_cb9941_c9/flp0/579       | NA                          | R01_cb9941_c9/flp0/579      | R01_cb9941_c9/flp0/579      | R01_cb9941_c9/flp0/579       |

|                              |    |                              |                            |                            |
|------------------------------|----|------------------------------|----------------------------|----------------------------|
| R01_cb9057_c2/flp0/2081      | NA | R01_cb9057_c2/flp0/2081      | NA                         | NA                         |
| R01_cb16660_c1/f2p0/752      | NA | R01_cb16660_c1/f2p0/752      | NA                         | R01_cb16660_c1/f2p0/752    |
| R01_cb12057_c14/flp0/1492    | NA | R01_cb12057_c14/flp0/1492    | NA                         | NA                         |
| R01_cb8564_c128333/flp1/2000 | NA | R01_cb8564_c128333/flp1/2000 | NA                         | NA                         |
| R01_cb2334_c7/flp0/2732      | NA | R01_cb2334_c7/flp0/2732      | NA                         | NA                         |
| R01_cb8564_c119927/flp0/2616 | NA | R01_cb8564_c119927/flp0/2616 | NA                         | NA                         |
| R01_cb8564_c85521/flp0/3423  | NA | R01_cb8564_c85521/flp0/3423  | NA                         | NA                         |
| R01_cb10156_c3/flp0/1158     | NA | R01_cb10156_c3/flp0/1158     | NA                         | NA                         |
| R01_cb14627_c6/flp0/1063     | NA | NA                           | NA                         | R01_cb14627_c6/flp0/1063   |
| R01_cb570_c6/flp0/4743       | NA | R01_cb570_c6/flp0/4743       | NA                         | NA                         |
| R01_cb8564_c2546/flp0/3021   | NA | NA                           | R01_cb8564_c2546/flp0/3021 | R01_cb8564_c2546/flp0/3021 |
| R01_cb15714_c3/flp0/705      | NA | R01_cb15714_c3/flp0/705      | NA                         | NA                         |
| R01_cb16182_c2/flp1/1825     | NA | NA                           | NA                         | R01_cb16182_c2/flp1/1825   |
| R01_cb17640_c1/flp0/1318     | NA | NA                           | NA                         | R01_cb17640_c1/flp0/1318   |
| R01_cb15145_c2/flp0/608      | NA | R01_cb15145_c2/flp0/608      | R01_cb15145_c2/flp0/608    | NA                         |
| R01_cb3359_c26/flp0/2229     | NA | NA                           | NA                         | R01_cb3359_c26/flp0/2229   |
| R01_cb10138_c8/flp0/780      | NA | NA                           | NA                         | R01_cb10138_c8/flp0/780    |
| R01_cb9112_c1/flp0/2224      | NA | R01_cb9112_c1/flp0/2224      | R01_cb9112_c1/flp0/2224    | R01_cb9112_c1/flp0/2224    |
| R01_cb17201_c0/flp0/1540     | NA | NA                           | R01_cb17201_c0/flp0/1540   | R01_cb17201_c0/flp0/1540   |
| R01_cb3053_c3/flp0/3737      | NA | R01_cb3053_c3/flp0/3737      | NA                         | R01_cb3053_c3/flp0/3737    |
| R01_cb18409_c41/flp0/890     | NA | NA                           | NA                         | R01_cb18409_c41/flp0/890   |
| R01_cb11685_c0/flp0/1539     | NA | R01_cb11685_c0/flp0/1539     | NA                         | R01_cb11685_c0/flp0/1539   |
| R01_cb10118_c1/flp0/2135     | NA | R01_cb10118_c1/flp0/2135     | NA                         | NA                         |
| R01_cb16470_c1/flp0/701      | NA | R01_cb16470_c1/flp0/701      | NA                         | NA                         |

|                              |                             |                              |                             |                              |
|------------------------------|-----------------------------|------------------------------|-----------------------------|------------------------------|
| R01_cb17946_c1/flp0/657      | NA                          | R01_cb17946_c1/flp0/657      | NA                          | NA                           |
| R01_cb781_c18/flp0/2084      | NA                          | NA                           | NA                          | R01_cb781_c18/flp0/2084      |
| R01_cb8564_c111062/flp0/1980 | NA                          | R01_cb8564_c111062/flp0/1980 | NA                          | NA                           |
| R01_cb17736_c0/flp0/444      | NA                          | NA                           | R01_cb17736_c0/flp0/444     | R01_cb17736_c0/flp0/444      |
| R01_cb12178_c3/f2p0/527      | R01_cb12178_c3/f2p0/527     | R01_cb12178_c3/f2p0/527      | NA                          | NA                           |
| R01_cb12603_c7/flp0/1521     | NA                          | NA                           | R01_cb12603_c7/flp0/1521    | R01_cb12603_c7/flp0/1521     |
| R01_cb18456_c7201/flp0/1409  | NA                          | R01_cb18456_c7201/flp0/1409  | NA                          | NA                           |
| R01_cb16797_c1/flp0/1311     | R01_cb16797_c1/flp0/1311    | R01_cb16797_c1/flp0/1311     | R01_cb16797_c1/flp0/1311    | R01_cb16797_c1/flp0/1311     |
| R01_cb8564_c69597/flp0/4104  | NA                          | R01_cb8564_c69597/flp0/4104  | NA                          | R01_cb8564_c69597/flp0/4104  |
| R01_cb17990_c0/flp0/788      | R01_cb17990_c0/flp0/788     | R01_cb17990_c0/flp0/788      | R01_cb17990_c0/flp0/788     | R01_cb17990_c0/flp0/788      |
| R01_cb3563_c8/flp0/1656      | NA                          | NA                           | NA                          | R01_cb3563_c8/flp0/1656      |
| R01_cb8564_c75856/flp1/3365  | R01_cb8564_c75856/flp1/3365 | R01_cb8564_c75856/flp1/3365  | R01_cb8564_c75856/flp1/3365 | R01_cb8564_c75856/flp1/3365  |
| R01_cb17236_c1/f2p0/543      | NA                          | R01_cb17236_c1/f2p0/543      | R01_cb17236_c1/f2p0/543     | R01_cb17236_c1/f2p0/543      |
| R01_cb12946_c3/flp0/1018     | NA                          | R01_cb12946_c3/flp0/1018     | NA                          | NA                           |
| R01_cb8564_c125018/flp0/3452 | NA                          | R01_cb8564_c125018/flp0/3452 | NA                          | NA                           |
| R01_cb2027_c3/flp0/3757      | NA                          | R01_cb2027_c3/flp0/3757      | R01_cb2027_c3/flp0/3757     | NA                           |
| R01_cb3145_c2/flp0/3679      | NA                          | R01_cb3145_c2/flp0/3679      | NA                          | NA                           |
| R01_cb18456_c7953/f6p0/550   | NA                          | R01_cb18456_c7953/f6p0/550   | R01_cb18456_c7953/f6p0/550  | R01_cb18456_c7953/f6p0/550   |
| R01_cb16403_c1/flp0/839      | NA                          | R01_cb16403_c1/flp0/839      | R01_cb16403_c1/flp0/839     | R01_cb16403_c1/flp0/839      |
| R01_cb8564_c17223/flp0/4169  | NA                          | R01_cb8564_c17223/flp0/4169  | R01_cb8564_c17223/flp0/4169 | NA                           |
| R01_cb8564_c117034/flp1/2624 | NA                          | R01_cb8564_c117034/flp1/2624 | NA                          | R01_cb8564_c117034/flp1/2624 |
| R01_cb10708_c1/flp0/2292     | R01_cb10708_c1/flp0/2292    | R01_cb10708_c1/flp0/2292     | NA                          | NA                           |

|                             |                             |                             |                             |                             |
|-----------------------------|-----------------------------|-----------------------------|-----------------------------|-----------------------------|
| R01_cb8564_c80864/flp0/3876 | NA                          | R01_cb8564_c80864/flp0/3876 | R01_cb8564_c80864/flp0/3876 | R01_cb8564_c80864/flp0/3876 |
| R01_cb18173_c0/flp0/614     | NA                          | R01_cb18173_c0/flp0/614     | NA                          | R01_cb18173_c0/flp0/614     |
| R01_cb10206_c28/f2p0/1569   | NA                          | R01_cb10206_c28/f2p0/1569   | NA                          | NA                          |
| R01_cb7814_c4/flp0/2751     | NA                          | NA                          | NA                          | R01_cb7814_c4/flp0/2751     |
| R01_cb4785_c7/flp0/2764     | NA                          | NA                          | NA                          | R01_cb4785_c7/flp0/2764     |
| R01_cb8564_c24387/flp0/2638 | NA                          | R01_cb8564_c24387/flp0/2638 | NA                          | NA                          |
| R01_cb8324_c10/flp0/1375    | NA                          | NA                          | NA                          | R01_cb8324_c10/flp0/1375    |
| R01_cb17065_c2/flp0/1048    | NA                          | R01_cb17065_c2/flp0/1048    | NA                          | R01_cb17065_c2/flp0/1048    |
| R01_cb3464_c3/flp0/3337     | NA                          | NA                          | NA                          | R01_cb3464_c3/flp0/3337     |
| R01_cb15765_c0/f2p0/867     | R01_cb15765_c0/f2p0/867     | R01_cb15765_c0/f2p0/867     | R01_cb15765_c0/f2p0/867     | R01_cb15765_c0/f2p0/867     |
| R01_cb18456_c5358/flp0/875  | NA                          | R01_cb18456_c5358/flp0/875  | NA                          | NA                          |
| R01_cb18287_c5/flp0/1095    | R01_cb18287_c5/flp0/1095    | R01_cb18287_c5/flp0/1095    | R01_cb18287_c5/flp0/1095    | R01_cb18287_c5/flp0/1095    |
| R01_cb10015_c264/flp0/568   | NA                          | R01_cb10015_c264/flp0/568   | NA                          | NA                          |
| R01_cb8564_c83310/flp0/2140 | R01_cb8564_c83310/flp0/2140 | R01_cb8564_c83310/flp0/2140 | NA                          | R01_cb8564_c83310/flp0/2140 |
| R01_cb9609_c0/f7p1/2034     | NA                          | NA                          | NA                          | R01_cb9609_c0/f7p1/2034     |
| R01_cb8564_c112577/flp0/404 | R01_cb8564_c112577/flp0/404 | R01_cb8564_c112577/flp0/404 | R01_cb8564_c112577/flp0/404 | R01_cb8564_c112577/flp0/404 |
| R01_cb4471_c11/flp0/3111    | NA                          | NA                          | NA                          | R01_cb4471_c11/flp0/3111    |
| R01_cb8564_c23940/flp0/3025 | NA                          | NA                          | NA                          | R01_cb8564_c23940/flp0/3025 |
| R01_cb15710_c3/flp0/630     | NA                          | R01_cb15710_c3/flp0/630     | NA                          | NA                          |
| R01_cb16422_c3/flp0/643     | NA                          | NA                          | R01_cb16422_c3/flp0/643     | R01_cb16422_c3/flp0/643     |
| R01_cb5581_c2/flp0/3067     | NA                          | R01_cb5581_c2/flp0/3067     | NA                          | NA                          |
| R01_cb8564_c80984/flp0/3227 | NA                          | R01_cb8564_c80984/flp0/3227 | R01_cb8564_c80984/flp0/3227 | NA                          |
| R01_cb11230_c1/flp0/3015    | R01_cb11230_c1/flp0/3015    | R01_cb11230_c1/flp0/3015    | R01_cb11230_c1/flp0/3015    | R01_cb11230_c1/flp0/3015    |
| R01_cb279_c13/flp0/4553     | NA                          | NA                          | NA                          | R01_cb279_c13/flp0/4553     |

|                             |                             |                             |                             |                             |
|-----------------------------|-----------------------------|-----------------------------|-----------------------------|-----------------------------|
| R01_cb10114_c4/flp0/1307    | NA                          | R01_cb10114_c4/flp0/1307    | NA                          | R01_cb10114_c4/flp0/1307    |
| R01_cb8564_c84266/flp2/3194 | NA                          | NA                          | NA                          | R01_cb8564_c84266/flp2/3194 |
| R01_cb11248_c0/f2p0/726     | NA                          | R01_cb11248_c0/f2p0/726     | NA                          | NA                          |
| R01_cb10732_c2/flp0/3472    | NA                          | R01_cb10732_c2/flp0/3472    | NA                          | NA                          |
| R01_cb16071_c1/flp0/813     | NA                          | R01_cb16071_c1/flp0/813     | NA                          | R01_cb16071_c1/flp0/813     |
| R01_cb18223_c14/flp0/1132   | R01_cb18223_c14/flp0/1132   | R01_cb18223_c14/flp0/1132   | NA                          | NA                          |
| R01_cb7420_c15/flp0/499     | NA                          | R01_cb7420_c15/flp0/499     | R01_cb7420_c15/flp0/499     | R01_cb7420_c15/flp0/499     |
| R01_cb8564_c90640/flp0/3061 | NA                          | NA                          | NA                          | R01_cb8564_c90640/flp0/3061 |
| R01_cb13703_c4/flp2/523     | R01_cb13703_c4/flp2/523     | NA                          | NA                          | NA                          |
| R01_cb479_c0/f6p6/4735      | NA                          | NA                          | NA                          | R01_cb479_c0/f6p6/4735      |
| R01_cb8564_c16568/f9p0/2643 | NA                          | R01_cb8564_c16568/f9p0/2643 | NA                          | NA                          |
| R01_cb7999_c10/flp0/814     | NA                          | NA                          | NA                          | R01_cb7999_c10/flp0/814     |
| R01_cb7178_c1/flp0/2668     | NA                          | R01_cb7178_c1/flp0/2668     | NA                          | NA                          |
| R01_cb13438_c0/f3p0/911     | NA                          | NA                          | NA                          | R01_cb13438_c0/f3p0/911     |
| R01_cb8127_c4/flp0/2058     | NA                          | R01_cb8127_c4/flp0/2058     | NA                          | NA                          |
| R01_cb763_c11/flp0/818      | R01_cb763_c11/flp0/818      | R01_cb763_c11/flp0/818      | R01_cb763_c11/flp0/818      | R01_cb763_c11/flp0/818      |
| R01_cb8564_c79747/flp0/3160 | R01_cb8564_c79747/flp0/3160 | R01_cb8564_c79747/flp0/3160 | R01_cb8564_c79747/flp0/3160 | R01_cb8564_c79747/flp0/3160 |
| R01_cb714_c13/flp0/2393     | NA                          | NA                          | NA                          | R01_cb714_c13/flp0/2393     |
| R01_cb931_c2/flp0/2178      | NA                          | R01_cb931_c2/flp0/2178      | R01_cb931_c2/flp0/2178      | NA                          |
| R01_cb11772_c0/flp0/551     | R01_cb11772_c0/flp0/551     | R01_cb11772_c0/flp0/551     | R01_cb11772_c0/flp0/551     | R01_cb11772_c0/flp0/551     |
| R01_cb977_c1/flp0/4540      | NA                          | NA                          | NA                          | R01_cb977_c1/flp0/4540      |
| R01_cb18627_c1/flp0/924     | NA                          | R01_cb18627_c1/flp0/924     | R01_cb18627_c1/flp0/924     | R01_cb18627_c1/flp0/924     |
| R01_cb16853_c0/f2p0/1229    | NA                          | NA                          | NA                          | R01_cb16853_c0/f2p0/1229    |
| R01_cb8324_c1/f3p1/1379     | NA                          | NA                          | NA                          | R01_cb8324_c1/f3p1/1379     |
| R01_cb8564_c87724/flp0/2766 | NA                          | R01_cb8564_c87724/flp0/2766 | NA                          | NA                          |

|                              |                           |                           |                             |                              |
|------------------------------|---------------------------|---------------------------|-----------------------------|------------------------------|
| R01_cb1938_c8/flp0/2471      | NA                        | NA                        | NA                          | R01_cb1938_c8/flp0/2471      |
| R01_cb8564_c110276/f2p0/2540 | NA                        | NA                        | NA                          | R01_cb8564_c110276/f2p0/2540 |
| R01_cb10154_c0/flp1/1631     | NA                        | NA                        | NA                          | R01_cb10154_c0/flp1/1631     |
| R01_cb11682_c0/flp0/1226     | NA                        | NA                        | NA                          | R01_cb11682_c0/flp0/1226     |
| R01_cb3848_c22/flp1/3080     | NA                        | NA                        | NA                          | R01_cb3848_c22/flp1/3080     |
| R01_cb6608_c13/flp0/1941     | NA                        | NA                        | NA                          | R01_cb6608_c13/flp0/1941     |
| R01_cb5307_c14/flp0/3080     | NA                        | NA                        | NA                          | R01_cb5307_c14/flp0/3080     |
| R01_cb4169_c11/flp0/1444     | NA                        | NA                        | NA                          | R01_cb4169_c11/flp0/1444     |
| R01_cb3287_c4/flp0/3898      | NA                        | NA                        | NA                          | R01_cb3287_c4/flp0/3898      |
| R01_cb12566_c8/flp0/495      | NA                        | R01_cb12566_c8/flp0/495   | NA                          | NA                           |
| R01_cb8564_c21087/flp0/2226  | NA                        | NA                        | R01_cb8564_c21087/flp0/2226 | R01_cb8564_c21087/flp0/2226  |
| R01_cb9916_c3/flp1/1541      | NA                        | NA                        | NA                          | R01_cb9916_c3/flp1/1541      |
| R01_cb18158_c1/flp0/571      | NA                        | R01_cb18158_c1/flp0/571   | NA                          | NA                           |
| R01_cb16682_c13/flp0/743     | NA                        | R01_cb16682_c13/flp0/743  | R01_cb16682_c13/flp0/743    | NA                           |
| R01_cb8564_c111413/flp0/2839 | NA                        | NA                        | NA                          | R01_cb8564_c111413/flp0/2839 |
| R01_cb1228_c13/flp0/2005     | NA                        | R01_cb1228_c13/flp0/2005  | NA                          | R01_cb1228_c13/flp0/2005     |
| R01_cb13867_c10/flp0/1652    | R01_cb13867_c10/flp0/1652 | R01_cb13867_c10/flp0/1652 | NA                          | R01_cb13867_c10/flp0/1652    |
| R01_cb16303_c9/flp0/2953     | NA                        | NA                        | NA                          | R01_cb16303_c9/flp0/2953     |
| R01_cb7679_c4/flp0/3465      | NA                        | R01_cb7679_c4/flp0/3465   | NA                          | NA                           |
| R01_cb2129_c1/flp0/2099      | R01_cb2129_c1/flp0/2099   | R01_cb2129_c1/flp0/2099   | NA                          | NA                           |
| R01_cb4535_c10/flp0/937      | R01_cb4535_c10/flp0/937   | R01_cb4535_c10/flp0/937   | NA                          | R01_cb4535_c10/flp0/937      |
| R01_cb17326_c0/flp0/712      | NA                        | R01_cb17326_c0/flp0/712   | NA                          | R01_cb17326_c0/flp0/712      |
| R01_cb13910_c10/flp0/1230    | NA                        | R01_cb13910_c10/flp0/1230 | R01_cb13910_c10/flp0/1230   | R01_cb13910_c10/flp0/1230    |
| R01_cb10587_c2/flp0/2777     | R01_cb10587_c2/flp0/2777  | R01_cb10587_c2/flp0/2777  | R01_cb10587_c2/flp0/2777    | NA                           |

|                             |                         |                             |                             |                             |
|-----------------------------|-------------------------|-----------------------------|-----------------------------|-----------------------------|
| R01_cb7224_c14/flp0/734     | NA                      | R01_cb7224_c14/flp0/734     | NA                          | R01_cb7224_c14/flp0/734     |
| R01_cb8407_c1/f2p0/1264     | NA                      | NA                          | NA                          | R01_cb8407_c1/f2p0/1264     |
| R01_cb1915_c17/flp0/2421    | NA                      | R01_cb1915_c17/flp0/2421    | NA                          | NA                          |
| R01_cb13938_c11/flp0/1528   | NA                      | NA                          | NA                          | R01_cb13938_c11/flp0/1528   |
| R01_cb5736_c2/flp0/2717     | NA                      | NA                          | NA                          | R01_cb5736_c2/flp0/2717     |
| R01_cb1691_c16/flp0/3702    | NA                      | R01_cb1691_c16/flp0/3702    | NA                          | NA                          |
| R01_cb1739_c8/flp0/5910     | NA                      | NA                          | NA                          | R01_cb1739_c8/flp0/5910     |
| R01_cb11870_c0/flp0/410     | R01_cb11870_c0/flp0/410 | R01_cb11870_c0/flp0/410     | R01_cb11870_c0/flp0/410     | NA                          |
| R01_cb226_c9/flp0/5006      | NA                      | NA                          | NA                          | R01_cb226_c9/flp0/5006      |
| R01_cb3575_c4/flp2/3595     | NA                      | NA                          | NA                          | R01_cb3575_c4/flp2/3595     |
| R01_cb12057_c12/flp0/580    | NA                      | R01_cb12057_c12/flp0/580    | R01_cb12057_c12/flp0/580    | NA                          |
| R01_cb2750_c2/flp0/2741     | NA                      | R01_cb2750_c2/flp0/2741     | NA                          | NA                          |
| R01_cb6608_c3/flp0/2812     | NA                      | NA                          | NA                          | R01_cb6608_c3/flp0/2812     |
| R01_cb8564_c76062/flp0/4468 | NA                      | NA                          | R01_cb8564_c76062/flp0/4468 | NA                          |
| R01_cb3162_c3/flp0/1716     | NA                      | R01_cb3162_c3/flp0/1716     | NA                          | NA                          |
| R01_cb6636_c1/flp0/2429     | NA                      | R01_cb6636_c1/flp0/2429     | NA                          | R01_cb6636_c1/flp0/2429     |
| R01_cb8564_c49718/flp0/2132 | NA                      | R01_cb8564_c49718/flp0/2132 | NA                          | R01_cb8564_c49718/flp0/2132 |
| R01_cb4900_c10/flp0/2337    | NA                      | NA                          | NA                          | R01_cb4900_c10/flp0/2337    |
| R01_cb5236_c67/flp0/1062    | NA                      | NA                          | NA                          | R01_cb5236_c67/flp0/1062    |
| R01_cb16240_c3/flp0/5417    | NA                      | R01_cb16240_c3/flp0/5417    | NA                          | NA                          |
| R01_cb5000_c5/flp0/3206     | R01_cb5000_c5/flp0/3206 | R01_cb5000_c5/flp0/3206     | R01_cb5000_c5/flp0/3206     | R01_cb5000_c5/flp0/3206     |
| R01_cb1900_c12/flp2/3840    | NA                      | NA                          | NA                          | R01_cb1900_c12/flp2/3840    |
| R01_cb8564_c5038/flp0/2526  | NA                      | NA                          | NA                          | R01_cb8564_c5038/flp0/2526  |
| R01_cb10207_c9/f2p0/645     | NA                      | R01_cb10207_c9/f2p0/645     | NA                          | NA                          |
| R01_cb13910_c8/flp0/1292    | NA                      | R01_cb13910_c8/flp0/1292    | R01_cb13910_c8/flp0/1292    | R01_cb13910_c8/flp0/1292    |
| R01_cb13545_c57/flp0/1021   | NA                      | R01_cb13545_c57/flp0/1021   | NA                          | R01_cb13545_c57/flp0/1021   |



|                             |                             |                             |                             |                             |
|-----------------------------|-----------------------------|-----------------------------|-----------------------------|-----------------------------|
| R01_cb17269_c2/f3p0/439     | NA                          | NA                          | R01_cb17269_c2/f3p0/439     | R01_cb17269_c2/f3p0/439     |
| R01_cb18456_c1865/f1p0/1641 | NA                          | R01_cb18456_c1865/f1p0/1641 | NA                          | NA                          |
| R01_cb1333_c32/f1p0/2647    | NA                          | R01_cb1333_c32/f1p0/2647    | R01_cb1333_c32/f1p0/2647    | R01_cb1333_c32/f1p0/2647    |
| R01_cb1794_c34/f1p0/863     | NA                          | R01_cb1794_c34/f1p0/863     | NA                          | R01_cb1794_c34/f1p0/863     |
| R01_cb8200_c2/f2p0/934      | NA                          | R01_cb8200_c2/f2p0/934      | NA                          | NA                          |
| R01_cb8564_c25125/f1p0/2068 | NA                          | NA                          | NA                          | R01_cb8564_c25125/f1p0/2068 |
| R01_cb10310_c3/f1p0/642     | R01_cb10310_c3/f1p0/642     | R01_cb10310_c3/f1p0/642     | R01_cb10310_c3/f1p0/642     | R01_cb10310_c3/f1p0/642     |
| R01_cb12422_c9/f1p2/1757    | NA                          | NA                          | NA                          | R01_cb12422_c9/f1p2/1757    |
| R01_cb16066_c0/f7p0/484     | R01_cb16066_c0/f7p0/484     | R01_cb16066_c0/f7p0/484     | R01_cb16066_c0/f7p0/484     | R01_cb16066_c0/f7p0/484     |
| R01_cb8564_c1028/f2p0/1918  | NA                          | NA                          | NA                          | R01_cb8564_c1028/f2p0/1918  |
| R01_cb8564_c79732/f1p0/2999 | NA                          | R01_cb8564_c79732/f1p0/2999 | NA                          | NA                          |
| R01_cb18223_c10/f1p0/1469   | R01_cb18223_c10/f1p0/1469   | NA                          | NA                          | NA                          |
| R01_cb8564_c112064/f1p0/278 | R01_cb8564_c112064/f1p0/278 | R01_cb8564_c112064/f1p0/278 | R01_cb8564_c112064/f1p0/278 | NA                          |
| 6                           | 86                          | 6                           | 6                           | NA                          |
| R01_cb7193_c2/f1p0/3593     | NA                          | R01_cb7193_c2/f1p0/3593     | NA                          | NA                          |
| R01_cb13124_c9/f1p0/1633    | NA                          | R01_cb13124_c9/f1p0/1633    | NA                          | NA                          |
| R01_cb10332_c1/f1p1/3046    | NA                          | NA                          | NA                          | R01_cb10332_c1/f1p1/3046    |
| R01_cb13234_c0/f3p0/592     | NA                          | R01_cb13234_c0/f3p0/592     | NA                          | NA                          |
| R01_cb1954_c1/f1p0/4115     | NA                          | R01_cb1954_c1/f1p0/4115     | NA                          | R01_cb1954_c1/f1p0/4115     |
| R01_cb13976_c4/f1p0/466     | NA                          | NA                          | NA                          | R01_cb13976_c4/f1p0/466     |
| R01_cb16447_c11/f1p0/918    | NA                          | NA                          | NA                          | R01_cb16447_c11/f1p0/918    |
| R01_cb8293_c5/f1p0/416      | R01_cb8293_c5/f1p0/416      | R01_cb8293_c5/f1p0/416      | R01_cb8293_c5/f1p0/416      | R01_cb8293_c5/f1p0/416      |
| R01_cb17533_c0/f1p0/677     | NA                          | NA                          | R01_cb17533_c0/f1p0/677     | R01_cb17533_c0/f1p0/677     |
| R01_cb8564_c7774/f3p4/1962  | NA                          | NA                          | NA                          | R01_cb8564_c7774/f3p4/1962  |
| R01_cb8564_c69296/f2p0/2798 | NA                          | R01_cb8564_c69296/f2p0/2798 | NA                          | NA                          |
| R01_cb18456_c7237/f1p0/982  | NA                          | R01_cb18456_c7237/f1p0/982  | R01_cb18456_c7237/f1p0/982  | R01_cb18456_c7237/f1p0/982  |

|                             |                            |                             |                             |                             |
|-----------------------------|----------------------------|-----------------------------|-----------------------------|-----------------------------|
| R01_cb8564_c91808/f1p0/2973 | NA                         | NA                          | NA                          | R01_cb8564_c91808/f1p0/2973 |
| R01_cb11477_c1/f1p0/3293    | NA                         | R01_cb11477_c1/f1p0/3293    | R01_cb11477_c1/f1p0/3293    | NA                          |
| R01_cb8564_c80587/f1p0/2798 | NA                         | R01_cb8564_c80587/f1p0/2798 | NA                          | NA                          |
| R01_cb11003_c0/f1p0/757     | NA                         | NA                          | NA                          | R01_cb11003_c0/f1p0/757     |
| R01_cb10941_c2/f1p1/2105    | NA                         | R01_cb10941_c2/f1p1/2105    | NA                          | NA                          |
| R01_cb10676_c4/f2p0/439     | NA                         | NA                          | NA                          | R01_cb10676_c4/f2p0/439     |
| R01_cb18456_c5918/f1p0/449  | R01_cb18456_c5918/f1p0/449 | R01_cb18456_c5918/f1p0/449  | R01_cb18456_c5918/f1p0/449  | R01_cb18456_c5918/f1p0/449  |
| R01_cb8433_c7/f1p0/2501     | R01_cb8433_c7/f1p0/2501    | R01_cb8433_c7/f1p0/2501     | R01_cb8433_c7/f1p0/2501     | R01_cb8433_c7/f1p0/2501     |
| R01_cb13467_c1/f1p0/731     | NA                         | R01_cb13467_c1/f1p0/731     | R01_cb13467_c1/f1p0/731     | R01_cb13467_c1/f1p0/731     |
| R01_cb4169_c9/f1p0/1562     | NA                         | NA                          | NA                          | R01_cb4169_c9/f1p0/1562     |
| R01_cb3848_c17/f1p0/3076    | NA                         | NA                          | NA                          | R01_cb3848_c17/f1p0/3076    |
| R01_cb16818_c3/f1p0/745     | R01_cb16818_c3/f1p0/745    | R01_cb16818_c3/f1p0/745     | R01_cb16818_c3/f1p0/745     | R01_cb16818_c3/f1p0/745     |
| R01_cb12273_c6/f1p0/1463    | NA                         | NA                          | NA                          | R01_cb12273_c6/f1p0/1463    |
| R01_cb8564_c121826/f1p0/270 | NA                         | R01_cb8564_c121826/f1p0/270 | R01_cb8564_c121826/f1p0/270 | R01_cb8564_c121826/f1p0/270 |
| 8                           | NA                         | 8                           | 8                           | 8                           |
| R01_cb8564_c120211/f1p0/236 | NA                         | R01_cb8564_c120211/f1p0/236 | NA                          | R01_cb8564_c120211/f1p0/236 |
| 3                           | NA                         | 3                           | NA                          | 3                           |
| R01_cb15207_c124/f5p2/466   | R01_cb15207_c124/f5p2/466  | R01_cb15207_c124/f5p2/466   | R01_cb15207_c124/f5p2/466   | R01_cb15207_c124/f5p2/466   |
| R01_cb9993_c5/f1p0/1238     | NA                         | NA                          | NA                          | R01_cb9993_c5/f1p0/1238     |
| R01_cb15958_c7/f1p0/1312    | NA                         | R01_cb15958_c7/f1p0/1312    | NA                          | R01_cb15958_c7/f1p0/1312    |
| R01_cb14060_c0/f1p1/1332    | NA                         | NA                          | NA                          | R01_cb14060_c0/f1p1/1332    |
| R01_cb8564_c68358/f4p0/2256 | NA                         | NA                          | R01_cb8564_c68358/f4p0/2256 | R01_cb8564_c68358/f4p0/2256 |
| R01_cb17363_c2/f4p1/650     | NA                         | R01_cb17363_c2/f4p1/650     | R01_cb17363_c2/f4p1/650     | R01_cb17363_c2/f4p1/650     |
| R01_cb14537_c1/f1p0/441     | R01_cb14537_c1/f1p0/441    | R01_cb14537_c1/f1p0/441     | NA                          | R01_cb14537_c1/f1p0/441     |
| R01_cb14363_c4/f1p0/365     | R01_cb14363_c4/f1p0/365    | R01_cb14363_c4/f1p0/365     | R01_cb14363_c4/f1p0/365     | R01_cb14363_c4/f1p0/365     |
| R01_cb16645_c42/f1p0/1259   | NA                         | NA                          | NA                          | R01_cb16645_c42/f1p0/1259   |

|                              |                           |                              |                           |                              |
|------------------------------|---------------------------|------------------------------|---------------------------|------------------------------|
| R01_cb8564_c117614/f2p1/1909 | NA                        | NA                           | NA                        | R01_cb8564_c117614/f2p1/1909 |
| R01_cb8564_c1112/f1p0/1849   | NA                        | NA                           | NA                        | R01_cb8564_c1112/f1p0/1849   |
| R01_cb1599_c2/f1p0/3360      | NA                        | NA                           | NA                        | R01_cb1599_c2/f1p0/3360      |
| R01_cb1676_c1/f1p0/4216      | NA                        | R01_cb1676_c1/f1p0/4216      | NA                        | NA                           |
| R01_cb2314_c8/f1p0/842       | R01_cb2314_c8/f1p0/842    | R01_cb2314_c8/f1p0/842       | NA                        | NA                           |
| R01_cb4576_c167/f1p0/410     | R01_cb4576_c167/f1p0/410  | R01_cb4576_c167/f1p0/410     | R01_cb4576_c167/f1p0/410  | R01_cb4576_c167/f1p0/410     |
| R01_cb8288_c5/f1p0/1571      | NA                        | R01_cb8288_c5/f1p0/1571      | NA                        | NA                           |
| R01_cb7568_c5/f1p0/476       | NA                        | R01_cb7568_c5/f1p0/476       | NA                        | R01_cb7568_c5/f1p0/476       |
| R01_cb8564_c4133/f1p0/3185   | NA                        | R01_cb8564_c4133/f1p0/3185   | NA                        | NA                           |
| R01_cb14524_c12/f1p0/972     | NA                        | NA                           | NA                        | R01_cb14524_c12/f1p0/972     |
| R01_cb16937_c1/f1p0/829      | NA                        | NA                           | NA                        | R01_cb16937_c1/f1p0/829      |
| R01_cb13068_c4/f1p0/514      | NA                        | R01_cb13068_c4/f1p0/514      | NA                        | NA                           |
| R01_cb17184_c2/f1p0/761      | NA                        | R01_cb17184_c2/f1p0/761      | NA                        | NA                           |
| R01_cb16725_c4/f4p0/871      | R01_cb16725_c4/f4p0/871   | NA                           | NA                        | NA                           |
| R01_cb14720_c7/f1p0/556      | NA                        | NA                           | NA                        | R01_cb14720_c7/f1p0/556      |
| R01_cb12600_c2/f1p0/609      | NA                        | R01_cb12600_c2/f1p0/609      | NA                        | R01_cb12600_c2/f1p0/609      |
| R01_cb13778_c3/f1p0/758      | R01_cb13778_c3/f1p0/758   | R01_cb13778_c3/f1p0/758      | R01_cb13778_c3/f1p0/758   | R01_cb13778_c3/f1p0/758      |
| R01_cb8564_c123222/f1p0/2361 | NA                        | R01_cb8564_c123222/f1p0/2361 | NA                        | R01_cb8564_c123222/f1p0/2361 |
| R01_cb18404_c2/f1p0/962      | NA                        | R01_cb18404_c2/f1p0/962      | NA                        | NA                           |
| R01_cb14481_c7/f1p0/478      | R01_cb14481_c7/f1p0/478   | R01_cb14481_c7/f1p0/478      | NA                        | R01_cb14481_c7/f1p0/478      |
| R01_cb10350_c6/f1p1/1107     | NA                        | NA                           | NA                        | R01_cb10350_c6/f1p1/1107     |
| R01_cb3921_c3/f1p0/1894      | NA                        | NA                           | NA                        | R01_cb3921_c3/f1p0/1894      |
| R01_cb8564_c78758/f1p0/3299  | NA                        | R01_cb8564_c78758/f1p0/3299  | NA                        | NA                           |
| R01_cb13761_c13/f1p0/1259    | R01_cb13761_c13/f1p0/1259 | R01_cb13761_c13/f1p0/1259    | R01_cb13761_c13/f1p0/1259 | R01_cb13761_c13/f1p0/1259    |

|                             |                             |                             |                             |                             |
|-----------------------------|-----------------------------|-----------------------------|-----------------------------|-----------------------------|
| R01_cb10306_c4/flp0/642     | NA                          | R01_cb10306_c4/flp0/642     | NA                          | R01_cb10306_c4/flp0/642     |
| R01_cb15890_c2/flp0/735     | NA                          | NA                          | NA                          | R01_cb15890_c2/flp0/735     |
| R01_cb8564_c86543/f2p0/2775 | NA                          | R01_cb8564_c86543/f2p0/2775 | NA                          | NA                          |
| R01_cb10259_c4/flp0/2516    | NA                          | R01_cb10259_c4/flp0/2516    | NA                          | NA                          |
| R01_cb16774_c6/flp1/1292    | NA                          | R01_cb16774_c6/flp1/1292    | NA                          | NA                          |
| R01_cb10693_c1/f2p0/1622    | NA                          | NA                          | NA                          | R01_cb10693_c1/f2p0/1622    |
| R01_cb11868_c1/flp0/597     | NA                          | NA                          | R01_cb11868_c1/flp0/597     | R01_cb11868_c1/flp0/597     |
| R01_cb17728_c1/flp0/1524    | NA                          | R01_cb17728_c1/flp0/1524    | NA                          | NA                          |
| R01_cb7773_c3/flp0/2091     | R01_cb7773_c3/flp0/2091     | R01_cb7773_c3/flp0/2091     | NA                          | R01_cb7773_c3/flp0/2091     |
| R01_cb9380_c8/fl2p0/1954    | NA                          | NA                          | NA                          | R01_cb9380_c8/fl2p0/1954    |
| R01_cb8564_c1058/flp0/2453  | NA                          | R01_cb8564_c1058/flp0/2453  | R01_cb8564_c1058/flp0/2453  | R01_cb8564_c1058/flp0/2453  |
| R01_cb13802_c1/flp0/1380    | NA                          | NA                          | NA                          | R01_cb13802_c1/flp0/1380    |
| R01_cb15136_c1/flp0/567     | R01_cb15136_c1/flp0/567     | R01_cb15136_c1/flp0/567     | R01_cb15136_c1/flp0/567     | R01_cb15136_c1/flp0/567     |
| R01_cb8564_c90076/flp1/3925 | NA                          | NA                          | NA                          | R01_cb8564_c90076/flp1/3925 |
| R01_cb8121_c4/flp0/1279     | NA                          | NA                          | NA                          | R01_cb8121_c4/flp0/1279     |
| R01_cb18409_c85/flp0/1048   | R01_cb18409_c85/flp0/1048   | R01_cb18409_c85/flp0/1048   | R01_cb18409_c85/flp0/1048   | R01_cb18409_c85/flp0/1048   |
| R01_cb17183_c2/flp2/667     | NA                          | NA                          | NA                          | R01_cb17183_c2/flp2/667     |
| R01_cb8564_c114197/flp0/242 | R01_cb8564_c114197/flp0/242 | R01_cb8564_c114197/flp0/242 | R01_cb8564_c114197/flp0/242 | NA                          |
| 8                           | 28                          | 8                           | 8                           |                             |
| R01_cb2243_c2/flp0/8205     | NA                          | NA                          | NA                          | R01_cb2243_c2/flp0/8205     |
| R01_cb1847_c2/flp0/4060     | NA                          | NA                          | NA                          | R01_cb1847_c2/flp0/4060     |
| R01_cb18456_c6443/flp1/629  | NA                          | R01_cb18456_c6443/flp1/629  | NA                          | NA                          |
| R01_cb15526_c0/f2p0/1121    | NA                          | NA                          | NA                          | R01_cb15526_c0/f2p0/1121    |
| R01_cb8198_c6/flp1/1844     | NA                          | NA                          | NA                          | R01_cb8198_c6/flp1/1844     |
| R01_cb8564_c83128/flp0/3323 | NA                          | NA                          | NA                          | R01_cb8564_c83128/flp0/3323 |
| R01_cb7302_c1/flp0/2651     | NA                          | NA                          | NA                          | R01_cb7302_c1/flp0/2651     |

|                                  |                                   |                                  |                                  |                            |
|----------------------------------|-----------------------------------|----------------------------------|----------------------------------|----------------------------|
| R01_cb7705_c0/flp0/2553          | R01_cb7705_c0/flp0/2553           | R01_cb7705_c0/flp0/2553          | R01_cb7705_c0/flp0/2553          | R01_cb7705_c0/flp0/2553    |
| R01_cb11936_c24/flp0/479         | R01_cb11936_c24/flp0/479          | R01_cb11936_c24/flp0/479         | R01_cb11936_c24/flp0/479         | R01_cb11936_c24/flp0/479   |
| R01_cb13467_c0/f2p0/1476         | NA                                | R01_cb13467_c0/f2p0/1476         | R01_cb13467_c0/f2p0/1476         | R01_cb13467_c0/f2p0/1476   |
| R01_cb13027_c1/f2p0/1126         | NA                                | NA                               | NA                               | R01_cb13027_c1/f2p0/1126   |
| R01_cb5659_c65/flp0/2179         | NA                                | NA                               | NA                               | R01_cb5659_c65/flp0/2179   |
| R01_cb8564_c128731/flp0/226<br>2 | NA                                | R01_cb8564_c128731/flp0/226<br>2 | R01_cb8564_c128731/flp0/226<br>2 | NA                         |
| R01_cb11022_c1/flp0/2335         | NA                                | NA                               | R01_cb11022_c1/flp0/2335         | NA                         |
| R01_cb18456_c5797/flp0/856       | NA                                | NA                               | NA                               | R01_cb18456_c5797/flp0/856 |
| R01_cb16915_c2/flp0/751          | R01_cb16915_c2/flp0/751           | R01_cb16915_c2/flp0/751          | NA                               | NA                         |
| R01_cb6758_c7/flp0/1936          | NA                                | NA                               | NA                               | R01_cb6758_c7/flp0/1936    |
| R01_cb16064_c1/flp0/1086         | NA                                | NA                               | NA                               | R01_cb16064_c1/flp0/1086   |
| R01_cb8564_c117708/flp0/197<br>9 | R01_cb8564_c117708/flp0/197<br>79 | R01_cb8564_c117708/flp0/197<br>9 | NA                               | NA                         |
| R01_cb14823_c8/flp0/1380         | NA                                | NA                               | NA                               | R01_cb14823_c8/flp0/1380   |
| R01_cb10782_c1/flp0/4624         | NA                                | NA                               | R01_cb10782_c1/flp0/4624         | R01_cb10782_c1/flp0/4624   |
| R01_cb10260_c1/flp0/3041         | NA                                | NA                               | NA                               | R01_cb10260_c1/flp0/3041   |
| R01_cb12980_c5/flp0/300          | R01_cb12980_c5/flp0/300           | R01_cb12980_c5/flp0/300          | R01_cb12980_c5/flp0/300          | R01_cb12980_c5/flp0/300    |
| R01_cb17949_c0/f2p0/553          | R01_cb17949_c0/f2p0/553           | R01_cb17949_c0/f2p0/553          | NA                               | R01_cb17949_c0/f2p0/553    |
| R01_cb8564_c1646/flp0/3260       | NA                                | NA                               | NA                               | R01_cb8564_c1646/flp0/3260 |
| R01_cb16277_c3/flp0/1306         | R01_cb16277_c3/flp0/1306          | R01_cb16277_c3/flp0/1306         | NA                               | NA                         |
| R01_cb4373_c9/flp0/3071          | NA                                | NA                               | NA                               | R01_cb4373_c9/flp0/3071    |
| R01_cb11456_c2/flp0/3006         | NA                                | R01_cb11456_c2/flp0/3006         | NA                               | NA                         |
| R01_cb10144_c1/flp1/1897         | NA                                | NA                               | NA                               | R01_cb10144_c1/flp1/1897   |
| R01_cb10694_c5/flp1/613          | R01_cb10694_c5/flp1/613           | NA                               | NA                               | R01_cb10694_c5/flp1/613    |
| R01_cb1610_c6/flp0/2698          | NA                                | NA                               | NA                               | R01_cb1610_c6/flp0/2698    |

|                              |                             |                              |                             |                             |
|------------------------------|-----------------------------|------------------------------|-----------------------------|-----------------------------|
| R01_cb8564_c15369/f2p0/3807  | NA                          | NA                           | NA                          | R01_cb8564_c15369/f2p0/3807 |
| R01_cb10952_c1/f1p0/1950     | NA                          | NA                           | NA                          | R01_cb10952_c1/f1p0/1950    |
| R01_cb18065_c1/f1p0/1845     | R01_cb18065_c1/f1p0/1845    | R01_cb18065_c1/f1p0/1845     | R01_cb18065_c1/f1p0/1845    | R01_cb18065_c1/f1p0/1845    |
| R01_cb4916_c5/f1p0/1981      | NA                          | NA                           | NA                          | R01_cb4916_c5/f1p0/1981     |
| R01_cb11717_c2/f1p0/1301     | NA                          | NA                           | R01_cb11717_c2/f1p0/1301    | R01_cb11717_c2/f1p0/1301    |
| R01_cb8136_c5/f1p0/2657      | NA                          | R01_cb8136_c5/f1p0/2657      | NA                          | NA                          |
| R01_cb1860_c6/f1p0/3927      | NA                          | NA                           | NA                          | R01_cb1860_c6/f1p0/3927     |
| R01_cb14638_c1/f2p0/1355     | NA                          | NA                           | NA                          | R01_cb14638_c1/f2p0/1355    |
| R01_cb1856_c0/f1p0/3930      | NA                          | R01_cb1856_c0/f1p0/3930      | NA                          | R01_cb1856_c0/f1p0/3930     |
| R01_cb8564_c45750/f1p0/3236  | R01_cb8564_c45750/f1p0/3236 | R01_cb8564_c45750/f1p0/3236  | R01_cb8564_c45750/f1p0/3236 | NA                          |
| R01_cb8564_c76909/f2p1/3012  | NA                          | NA                           | NA                          | R01_cb8564_c76909/f2p1/3012 |
| R01_cb1938_c4/f1p1/2103      | NA                          | NA                           | NA                          | R01_cb1938_c4/f1p1/2103     |
| R01_cb5847_c14/f3p0/2230     | NA                          | NA                           | NA                          | R01_cb5847_c14/f3p0/2230    |
| R01_cb8564_c46156/f1p0/2786  | NA                          | R01_cb8564_c46156/f1p0/2786  | NA                          | NA                          |
| R01_cb8564_c115624/f1p0/2261 | NA                          | R01_cb8564_c115624/f1p0/2261 | NA                          | NA                          |
| R01_cb10270_c1/f1p0/2670     | NA                          | R01_cb10270_c1/f1p0/2670     | NA                          | NA                          |
| R01_cb1955_c23/f1p2/2518     | NA                          | NA                           | NA                          | R01_cb1955_c23/f1p2/2518    |
| R01_cb17358_c4/f1p0/1871     | NA                          | NA                           | NA                          | R01_cb17358_c4/f1p0/1871    |
| R01_cb8529_c7/f1p0/1126      | NA                          | NA                           | NA                          | R01_cb8529_c7/f1p0/1126     |
| R01_cb18456_c7379/f1p0/408   | R01_cb18456_c7379/f1p0/408  | R01_cb18456_c7379/f1p0/408   | R01_cb18456_c7379/f1p0/408  | R01_cb18456_c7379/f1p0/408  |
| R01_cb2072_c0/f7p0/3079      | NA                          | NA                           | NA                          | R01_cb2072_c0/f7p0/3079     |
| R01_cb4180_c8/f1p1/6772      | NA                          | NA                           | NA                          | R01_cb4180_c8/f1p1/6772     |
| R01_cb11355_c1/f1p0/2062     | NA                          | R01_cb11355_c1/f1p0/2062     | NA                          | NA                          |
| R01_cb15443_c1/f2p0/1068     | NA                          | NA                           | NA                          | R01_cb15443_c1/f2p0/1068    |

|                              |                            |                             |                            |                              |
|------------------------------|----------------------------|-----------------------------|----------------------------|------------------------------|
| R01_cb7821_c3/flp0/1820      | NA                         | NA                          | NA                         | R01_cb7821_c3/flp0/1820      |
| R01_cb18456_c6847/flp0/799   | NA                         | R01_cb18456_c6847/flp0/799  | NA                         | NA                           |
| R01_cb18038_c1/flp1/1813     | NA                         | R01_cb18038_c1/flp1/1813    | NA                         | NA                           |
| R01_cb6332_c6/flp0/1065      | NA                         | R01_cb6332_c6/flp0/1065     | NA                         | R01_cb6332_c6/flp0/1065      |
| R01_cb10664_c0/flp0/1214     | R01_cb10664_c0/flp0/1214   | R01_cb10664_c0/flp0/1214    | R01_cb10664_c0/flp0/1214   | NA                           |
| R01_cb8564_c14191/flp0/4011  | NA                         | R01_cb8564_c14191/flp0/4011 | NA                         | R01_cb8564_c14191/flp0/4011  |
| R01_cb5390_c2/f2p0/2906      | NA                         | R01_cb5390_c2/f2p0/2906     | NA                         | NA                           |
| R01_cb14238_c1/f4p2/1240     | NA                         | NA                          | NA                         | R01_cb14238_c1/f4p2/1240     |
| R01_cb3421_c13/flp0/4144     | NA                         | NA                          | NA                         | R01_cb3421_c13/flp0/4144     |
| R01_cb15293_c0/flp0/827      | NA                         | R01_cb15293_c0/flp0/827     | R01_cb15293_c0/flp0/827    | NA                           |
| R01_cb12319_c2/flp0/373      | R01_cb12319_c2/flp0/373    | NA                          | NA                         | R01_cb12319_c2/flp0/373      |
| R01_cb18456_c7505/flp0/720   | NA                         | R01_cb18456_c7505/flp0/720  | NA                         | NA                           |
| R01_cb18628_c1/flp0/1981     | NA                         | NA                          | NA                         | R01_cb18628_c1/flp0/1981     |
| R01_cb8564_c117154/flp1/3067 | NA                         | NA                          | NA                         | R01_cb8564_c117154/flp1/3067 |
| R01_cb12743_c4/flp0/1043     | NA                         | R01_cb12743_c4/flp0/1043    | NA                         | R01_cb12743_c4/flp0/1043     |
| R01_cb15279_c0/flp0/1473     | NA                         | NA                          | NA                         | R01_cb15279_c0/flp0/1473     |
| R01_cb8564_c3668/flp0/3187   | R01_cb8564_c3668/flp0/3187 | R01_cb8564_c3668/flp0/3187  | NA                         | NA                           |
| R01_cb4180_c4/flp0/3590      | NA                         | NA                          | NA                         | R01_cb4180_c4/flp0/3590      |
| R01_cb10062_c30/flp0/1248    | NA                         | R01_cb10062_c30/flp0/1248   | NA                         | NA                           |
| R01_cb480_c3/flp0/3684       | NA                         | NA                          | NA                         | R01_cb480_c3/flp0/3684       |
| R01_cb6071_c8/flp0/2512      | NA                         | NA                          | NA                         | R01_cb6071_c8/flp0/2512      |
| R01_cb13405_c0/f7p0/835      | NA                         | NA                          | NA                         | R01_cb13405_c0/f7p0/835      |
| R01_cb10229_c10/flp0/1188    | R01_cb10229_c10/flp0/1188  | R01_cb10229_c10/flp0/1188   | R01_cb10229_c10/flp0/1188  | R01_cb10229_c10/flp0/1188    |
| R01_cb17557_c1/flp0/1756     | NA                         | R01_cb17557_c1/flp0/1756    | NA                         | R01_cb17557_c1/flp0/1756     |
| R01_cb18456_c4767/flp0/370   | R01_cb18456_c4767/flp0/370 | R01_cb18456_c4767/flp0/370  | R01_cb18456_c4767/flp0/370 | R01_cb18456_c4767/flp0/370   |

|                              |                             |                              |                             |                              |
|------------------------------|-----------------------------|------------------------------|-----------------------------|------------------------------|
| R01_cb1178_c22/flp0/1348     | NA                          | NA                           | NA                          | R01_cb1178_c22/flp0/1348     |
| R01_cb8564_c11904/flp0/2709  | R01_cb8564_c11904/flp0/2709 | R01_cb8564_c11904/flp0/2709  | NA                          | NA                           |
| R01_cb8710_c9/flp0/3582      | NA                          | NA                           | R01_cb8710_c9/flp0/3582     | R01_cb8710_c9/flp0/3582      |
| R01_cb8564_c70727/flp0/3055  | R01_cb8564_c70727/flp0/3055 | R01_cb8564_c70727/flp0/3055  | R01_cb8564_c70727/flp0/3055 | R01_cb8564_c70727/flp0/3055  |
| R01_cb438_c2/flp0/4812       | NA                          | R01_cb438_c2/flp0/4812       | NA                          | R01_cb438_c2/flp0/4812       |
| R01_cb11453_c1/flp0/3600     | NA                          | NA                           | NA                          | R01_cb11453_c1/flp0/3600     |
| R01_cb18456_c4754/flp1/487   | R01_cb18456_c4754/flp1/487  | R01_cb18456_c4754/flp1/487   | NA                          | NA                           |
| R01_cb6615_c11/flp0/2412     | NA                          | R01_cb6615_c11/flp0/2412     | R01_cb6615_c11/flp0/2412    | R01_cb6615_c11/flp0/2412     |
| R01_cb8564_c121990/flp0/2391 | NA                          | R01_cb8564_c121990/flp0/2391 | NA                          | R01_cb8564_c121990/flp0/2391 |
| R01_cb10080_c13/flp0/719     | NA                          | R01_cb10080_c13/flp0/719     | NA                          | NA                           |
| R01_cb18223_c25/flp1/1052    | NA                          | R01_cb18223_c25/flp1/1052    | R01_cb18223_c25/flp1/1052   | R01_cb18223_c25/flp1/1052    |
| R01_cb8564_c70514/flp0/2375  | NA                          | NA                           | NA                          | R01_cb8564_c70514/flp0/2375  |
| R01_cb2719_c20/flp0/2940     | NA                          | NA                           | R01_cb2719_c20/flp0/2940    | R01_cb2719_c20/flp0/2940     |
| R01_cb4503_c9/f2p0/3305      | NA                          | R01_cb4503_c9/f2p0/3305      | NA                          | R01_cb4503_c9/f2p0/3305      |
| R01_cb8564_c17855/flp0/3100  | NA                          | R01_cb8564_c17855/flp0/3100  | NA                          | NA                           |
| R01_cb8564_c1317/flp0/2253   | NA                          | NA                           | R01_cb8564_c1317/flp0/2253  | NA                           |
| R01_cb1510_c1/flp0/2691      | NA                          | NA                           | NA                          | R01_cb1510_c1/flp0/2691      |
| R01_cb11613_c0/flp0/1719     | NA                          | R01_cb11613_c0/flp0/1719     | NA                          | NA                           |
| R01_cb4059_c4/flp0/2239      | NA                          | NA                           | NA                          | R01_cb4059_c4/flp0/2239      |
| R01_cb6345_c0/f2p1/2864      | NA                          | NA                           | NA                          | R01_cb6345_c0/f2p1/2864      |
| R01_cb101_c4/flp0/2110       | NA                          | NA                           | NA                          | R01_cb101_c4/flp0/2110       |
| R01_cb10244_c1/flp0/1277     | NA                          | R01_cb10244_c1/flp0/1277     | NA                          | NA                           |
| R01_cb14409_c0/f8p0/636      | R01_cb14409_c0/f8p0/636     | R01_cb14409_c0/f8p0/636      | R01_cb14409_c0/f8p0/636     | R01_cb14409_c0/f8p0/636      |



|                             |                            |                             |                            |                             |
|-----------------------------|----------------------------|-----------------------------|----------------------------|-----------------------------|
| R01_cb5963_c2/f1p0/3029     | NA                         | R01_cb5963_c2/f1p0/3029     | NA                         | NA                          |
| R01_cb6141_c1/f1p0/2928     | NA                         | R01_cb6141_c1/f1p0/2928     | NA                         | NA                          |
| R01_cb4444_c6/f1p0/3234     | NA                         | R01_cb4444_c6/f1p0/3234     | NA                         | R01_cb4444_c6/f1p0/3234     |
| R01_cb233_c28/f1p0/2010     | NA                         | NA                          | NA                         | R01_cb233_c28/f1p0/2010     |
| R01_cb8564_c1971/f1p0/2751  | NA                         | R01_cb8564_c1971/f1p0/2751  | NA                         | NA                          |
| R01_cb8327_c2/f1p0/1824     | NA                         | NA                          | NA                         | R01_cb8327_c2/f1p0/1824     |
| R01_cb8925_c16/f1p0/645     | NA                         | R01_cb8925_c16/f1p0/645     | NA                         | NA                          |
| R01_cb8564_c74606/f1p0/2240 | NA                         | R01_cb8564_c74606/f1p0/2240 | NA                         | NA                          |
| R01_cb5617_c11/f1p0/2501    | NA                         | R01_cb5617_c11/f1p0/2501    | NA                         | NA                          |
| R01_cb8478_c8/f2p0/2643     | NA                         | NA                          | NA                         | R01_cb8478_c8/f2p0/2643     |
| R01_cb8564_c84947/f1p0/3313 | NA                         | R01_cb8564_c84947/f1p0/3313 | NA                         | R01_cb8564_c84947/f1p0/3313 |
| R01_cb5190_c11/f7p3/2263    | NA                         | NA                          | NA                         | R01_cb5190_c11/f7p3/2263    |
| R01_cb18456_c7222/f1p0/1670 | NA                         | R01_cb18456_c7222/f1p0/1670 | NA                         | NA                          |
| R01_cb5756_c0/f1p0/2946     | R01_cb5756_c0/f1p0/2946    | R01_cb5756_c0/f1p0/2946     | R01_cb5756_c0/f1p0/2946    | R01_cb5756_c0/f1p0/2946     |
| R01_cb10694_c4/f1p0/2489    | NA                         | R01_cb10694_c4/f1p0/2489    | R01_cb10694_c4/f1p0/2489   | R01_cb10694_c4/f1p0/2489    |
| R01_cb18456_c6458/f1p0/389  | R01_cb18456_c6458/f1p0/389 | R01_cb18456_c6458/f1p0/389  | R01_cb18456_c6458/f1p0/389 | R01_cb18456_c6458/f1p0/389  |
| R01_cb12091_c0/f2p0/465     | R01_cb12091_c0/f2p0/465    | R01_cb12091_c0/f2p0/465     | R01_cb12091_c0/f2p0/465    | R01_cb12091_c0/f2p0/465     |
| R01_cb13781_c8/f1p0/575     | NA                         | NA                          | NA                         | R01_cb13781_c8/f1p0/575     |
| R01_cb15188_c1/f1p0/1754    | R01_cb15188_c1/f1p0/1754   | R01_cb15188_c1/f1p0/1754    | NA                         | R01_cb15188_c1/f1p0/1754    |
| R01_cb8650_c3/f1p0/2250     | R01_cb8650_c3/f1p0/2250    | R01_cb8650_c3/f1p0/2250     | R01_cb8650_c3/f1p0/2250    | NA                          |
| R01_cb10076_c3/f1p0/1902    | R01_cb10076_c3/f1p0/1902   | R01_cb10076_c3/f1p0/1902    | NA                         | R01_cb10076_c3/f1p0/1902    |
| R01_cb16452_c14/f1p0/1698   | R01_cb16452_c14/f1p0/1698  | R01_cb16452_c14/f1p0/1698   | R01_cb16452_c14/f1p0/1698  | R01_cb16452_c14/f1p0/1698   |
| R01_cb8564_c2472/f1p0/3325  | NA                         | R01_cb8564_c2472/f1p0/3325  | R01_cb8564_c2472/f1p0/3325 | R01_cb8564_c2472/f1p0/3325  |
| R01_cb13144_c9/f26p0/480    | R01_cb13144_c9/f26p0/480   | NA                          | NA                         | R01_cb13144_c9/f26p0/480    |
| R01_cb2921_c4/f1p0/1890     | NA                         | NA                          | NA                         | R01_cb2921_c4/f1p0/1890     |
| R01_cb11007_c6/f1p0/1412    | NA                         | NA                          | R01_cb11007_c6/f1p0/1412   | NA                          |

|                                  |                            |                                  |                            |                                  |
|----------------------------------|----------------------------|----------------------------------|----------------------------|----------------------------------|
| R01_cb8564_c115063/f1p0/230<br>2 | NA                         | R01_cb8564_c115063/f1p0/230<br>2 | NA                         | NA                               |
| R01_cb8564_c114859/f1p0/281<br>5 | NA                         | R01_cb8564_c114859/f1p0/281<br>5 | NA                         | NA                               |
| R01_cb10971_c1/f1p0/2098         | NA                         | R01_cb10971_c1/f1p0/2098         | R01_cb10971_c1/f1p0/2098   | NA                               |
| R01_cb2729_c0/f1p0/3826          | R01_cb2729_c0/f1p0/3826    | R01_cb2729_c0/f1p0/3826          | NA                         | R01_cb2729_c0/f1p0/3826          |
| R01_cb9877_c1/f1p0/2616          | NA                         | NA                               | NA                         | R01_cb9877_c1/f1p0/2616          |
| R01_cb15383_c2/f1p0/578          | NA                         | R01_cb15383_c2/f1p0/578          | NA                         | NA                               |
| R01_cb18378_c0/f2p0/646          | NA                         | R01_cb18378_c0/f2p0/646          | NA                         | R01_cb18378_c0/f2p0/646          |
| R01_cb9422_c3/f1p0/2269          | R01_cb9422_c3/f1p0/2269    | R01_cb9422_c3/f1p0/2269          | NA                         | NA                               |
| R01_cb8564_c3876/f1p0/2859       | R01_cb8564_c3876/f1p0/2859 | R01_cb8564_c3876/f1p0/2859       | R01_cb8564_c3876/f1p0/2859 | R01_cb8564_c3876/f1p0/2859       |
| R01_cb454_c23/f1p0/2557          | NA                         | NA                               | NA                         | R01_cb454_c23/f1p0/2557          |
| R01_cb7184_c7/f1p0/1882          | NA                         | R01_cb7184_c7/f1p0/1882          | NA                         | NA                               |
| R01_cb18456_c3582/f1p0/986       | NA                         | R01_cb18456_c3582/f1p0/986       | NA                         | NA                               |
| R01_cb6914_c16/f1p0/2349         | NA                         | NA                               | NA                         | R01_cb6914_c16/f1p0/2349         |
| R01_cb6284_c4/f3p0/1096          | NA                         | NA                               | NA                         | R01_cb6284_c4/f3p0/1096          |
| R01_cb18766_c1/f1p0/1220         | NA                         | R01_cb18766_c1/f1p0/1220         | R01_cb18766_c1/f1p0/1220   | R01_cb18766_c1/f1p0/1220         |
| R01_cb12641_c27/f1p0/1111        | NA                         | NA                               | NA                         | R01_cb12641_c27/f1p0/1111        |
| R01_cb8564_c109799/f2p0/216<br>7 | NA                         | R01_cb8564_c109799/f2p0/216<br>7 | NA                         | NA                               |
| R01_cb8564_c146635/f3p0/360<br>7 | NA                         | R01_cb8564_c146635/f3p0/360<br>7 | NA                         | R01_cb8564_c146635/f3p0/360<br>7 |
| R01_cb8564_c19073/f1p0/4292      | NA                         | NA                               | NA                         | R01_cb8564_c19073/f1p0/4292      |
| R01_cb11967_c10/f1p0/490         | NA                         | R01_cb11967_c10/f1p0/490         | R01_cb11967_c10/f1p0/490   | R01_cb11967_c10/f1p0/490         |
| R01_cb8564_c83860/f1p0/2902      | NA                         | R01_cb8564_c83860/f1p0/2902      | NA                         | NA                               |
| R01_cb12057_c40/f1p0/752         | R01_cb12057_c40/f1p0/752   | R01_cb12057_c40/f1p0/752         | NA                         | NA                               |

|                             |                            |                             |                             |                             |
|-----------------------------|----------------------------|-----------------------------|-----------------------------|-----------------------------|
| R01_cb18456_c7234/f1p0/521  | R01_cb18456_c7234/f1p0/521 | R01_cb18456_c7234/f1p0/521  | R01_cb18456_c7234/f1p0/521  | R01_cb18456_c7234/f1p0/521  |
| R01_cb16317_c2/f2p0/1287    | NA                         | NA                          | NA                          | R01_cb16317_c2/f2p0/1287    |
| R01_cb14920_c3/f1p0/598     | NA                         | R01_cb14920_c3/f1p0/598     | NA                          | NA                          |
| R01_cb8564_c18225/f1p0/2693 | NA                         | R01_cb8564_c18225/f1p0/2693 | NA                          | NA                          |
| R01_cb14283_c9/f13p1/514    | R01_cb14283_c9/f13p1/514   | R01_cb14283_c9/f13p1/514    | R01_cb14283_c9/f13p1/514    | NA                          |
| R01_cb14413_c3/f1p0/531     | NA                         | R01_cb14413_c3/f1p0/531     | NA                          | R01_cb14413_c3/f1p0/531     |
| R01_cb14128_c0/f4p0/1013    | NA                         | R01_cb14128_c0/f4p0/1013    | NA                          | NA                          |
| R01_cb8564_c4622/f2p2/2848  | NA                         | R01_cb8564_c4622/f2p2/2848  | R01_cb8564_c4622/f2p2/2848  | R01_cb8564_c4622/f2p2/2848  |
| R01_cb480_c2/f1p0/3018      | NA                         | NA                          | NA                          | R01_cb480_c2/f1p0/3018      |
| R01_cb6015_c11/f1p0/2374    | R01_cb6015_c11/f1p0/2374   | R01_cb6015_c11/f1p0/2374    | NA                          | NA                          |
| R01_cb10385_c10/f1p0/1526   | NA                         | R01_cb10385_c10/f1p0/1526   | NA                          | NA                          |
| R01_cb11557_c2/f1p1/917     | R01_cb11557_c2/f1p1/917    | R01_cb11557_c2/f1p1/917     | NA                          | R01_cb11557_c2/f1p1/917     |
| R01_cb1258_c1/f1p0/4428     | NA                         | R01_cb1258_c1/f1p0/4428     | R01_cb1258_c1/f1p0/4428     | NA                          |
| R01_cb14839_c2/f1p0/737     | R01_cb14839_c2/f1p0/737    | R01_cb14839_c2/f1p0/737     | R01_cb14839_c2/f1p0/737     | R01_cb14839_c2/f1p0/737     |
| R01_cb8564_c36636/f1p0/2302 | NA                         | R01_cb8564_c36636/f1p0/2302 | R01_cb8564_c36636/f1p0/2302 | R01_cb8564_c36636/f1p0/2302 |
| R01_cb3907_c4/f1p0/3038     | NA                         | R01_cb3907_c4/f1p0/3038     | NA                          | NA                          |
| R01_cb1331_c33/f1p4/1874    | NA                         | R01_cb1331_c33/f1p4/1874    | NA                          | NA                          |
| R01_cb15089_c0/f2p0/387     | R01_cb15089_c0/f2p0/387    | R01_cb15089_c0/f2p0/387     | R01_cb15089_c0/f2p0/387     | R01_cb15089_c0/f2p0/387     |
| R01_cb16132_c29/f1p0/826    | NA                         | NA                          | NA                          | R01_cb16132_c29/f1p0/826    |
| R01_cb639_c9/f1p0/652       | NA                         | NA                          | NA                          | R01_cb639_c9/f1p0/652       |
| R01_cb8564_c91180/f1p0/3622 | NA                         | R01_cb8564_c91180/f1p0/3622 | R01_cb8564_c91180/f1p0/3622 | R01_cb8564_c91180/f1p0/3622 |
| R01_cb110_c18/f1p0/3101     | NA                         | NA                          | NA                          | R01_cb110_c18/f1p0/3101     |
| R01_cb8030_c4/f1p0/2295     | NA                         | NA                          | NA                          | R01_cb8030_c4/f1p0/2295     |
| R01_cb10875_c1/f1p0/2477    | NA                         | R01_cb10875_c1/f1p0/2477    | NA                          | NA                          |
| R01_cb4490_c1/f2p0/2409     | NA                         | NA                          | NA                          | R01_cb4490_c1/f2p0/2409     |
| R01_cb10864_c1/f1p0/1920    | R01_cb10864_c1/f1p0/1920   | R01_cb10864_c1/f1p0/1920    | NA                          | NA                          |

|                             |                             |                             |                             |                             |
|-----------------------------|-----------------------------|-----------------------------|-----------------------------|-----------------------------|
| R01_cb16160_c4/flp1/879     | NA                          | R01_cb16160_c4/flp1/879     | NA                          | NA                          |
| R01_cb11850_c7/flp0/593     | R01_cb11850_c7/flp0/593     | R01_cb11850_c7/flp0/593     | NA                          | NA                          |
| R01_cb2177_c98/flp1/3415    | NA                          | NA                          | NA                          | R01_cb2177_c98/flp1/3415    |
| R01_cb8669_c10/flp0/1140    | NA                          | NA                          | NA                          | R01_cb8669_c10/flp0/1140    |
| R01_cb3752_c6/flp0/1186     | NA                          | NA                          | NA                          | R01_cb3752_c6/flp0/1186     |
| R01_cb18456_c7497/flp0/562  | R01_cb18456_c7497/flp0/562  | R01_cb18456_c7497/flp0/562  | R01_cb18456_c7497/flp0/562  | R01_cb18456_c7497/flp0/562  |
| R01_cb8564_c16062/flp0/4315 | R01_cb8564_c16062/flp0/4315 | R01_cb8564_c16062/flp0/4315 | NA                          | R01_cb8564_c16062/flp0/4315 |
| R01_cb6057_c0/f2p0/3239     | NA                          | R01_cb6057_c0/f2p0/3239     | NA                          | R01_cb6057_c0/f2p0/3239     |
| R01_cb14909_c2/flp0/797     | R01_cb14909_c2/flp0/797     | NA                          | R01_cb14909_c2/flp0/797     | R01_cb14909_c2/flp0/797     |
| R01_cb8564_c25451/flp0/3935 | NA                          | NA                          | NA                          | R01_cb8564_c25451/flp0/3935 |
| R01_cb10063_c7/f2p3/828     | NA                          | R01_cb10063_c7/f2p3/828     | NA                          | NA                          |
| R01_cb14980_c0/f5p0/535     | NA                          | R01_cb14980_c0/f5p0/535     | NA                          | NA                          |
| R01_cb8687_c4/flp0/3035     | NA                          | R01_cb8687_c4/flp0/3035     | NA                          | NA                          |
| R01_cb16871_c1/flp0/1446    | NA                          | NA                          | NA                          | R01_cb16871_c1/flp0/1446    |
| R01_cb709_c4/flp0/2561      | NA                          | R01_cb709_c4/flp0/2561      | R01_cb709_c4/flp0/2561      | NA                          |
| R01_cb3051_c15/flp0/2400    | NA                          | NA                          | NA                          | R01_cb3051_c15/flp0/2400    |
| R01_cb5953_c4/flp0/3405     | NA                          | NA                          | NA                          | R01_cb5953_c4/flp0/3405     |
| R01_cb15255_c1/flp0/760     | NA                          | NA                          | NA                          | R01_cb15255_c1/flp0/760     |
| R01_cb8564_c115297/flp0/252 | R01_cb8564_c115297/flp0/252 | R01_cb8564_c115297/flp0/252 | NA                          | NA                          |
| R01_cb18456_c5804/flp0/477  | R01_cb18456_c5804/flp0/477  | R01_cb18456_c5804/flp0/477  | R01_cb18456_c5804/flp0/477  | R01_cb18456_c5804/flp0/477  |
| R01_cb18025_c0/flp0/1087    | NA                          | R01_cb18025_c0/flp0/1087    | NA                          | NA                          |
| R01_cb8564_c19642/flp0/4457 | NA                          | R01_cb8564_c19642/flp0/4457 | NA                          | NA                          |
| R01_cb8564_c47016/flp0/2372 | R01_cb8564_c47016/flp0/2372 | R01_cb8564_c47016/flp0/2372 | R01_cb8564_c47016/flp0/2372 | R01_cb8564_c47016/flp0/2372 |

|                             |                             |                             |                             |                             |
|-----------------------------|-----------------------------|-----------------------------|-----------------------------|-----------------------------|
| R01_cb3026_c7/flp0/2238     | NA                          | R01_cb3026_c7/flp0/2238     | NA                          | NA                          |
| R01_cb13602_c25/flp0/1663   | NA                          | NA                          | NA                          | R01_cb13602_c25/flp0/1663   |
| R01_cb8564_c1396/flp0/2152  | R01_cb8564_c1396/flp0/2152  | NA                          | NA                          | NA                          |
| R01_cb1676_c11/flp0/5120    | NA                          | R01_cb1676_c11/flp0/5120    | NA                          | NA                          |
| R01_cb13322_c1/flp0/704     | NA                          | R01_cb13322_c1/flp0/704     | NA                          | NA                          |
| R01_cb12152_c3/flp0/747     | NA                          | NA                          | R01_cb12152_c3/flp0/747     | R01_cb12152_c3/flp0/747     |
| R01_cb10961_c1/flp0/3504    | NA                          | R01_cb10961_c1/flp0/3504    | NA                          | NA                          |
| R01_cb8564_c38225/flp0/4002 | NA                          | R01_cb8564_c38225/flp0/4002 | NA                          | NA                          |
| R01_cb8564_c49342/flp0/2182 | R01_cb8564_c49342/flp0/2182 | R01_cb8564_c49342/flp0/2182 | R01_cb8564_c49342/flp0/2182 | R01_cb8564_c49342/flp0/2182 |
| R01_cb3989_c3/flp1/2020     | NA                          | R01_cb3989_c3/flp1/2020     | NA                          | R01_cb3989_c3/flp1/2020     |
| R01_cb15118_c6/flp1/541     | NA                          | NA                          | NA                          | R01_cb15118_c6/flp1/541     |
| R01_cb16248_c2/flp0/1067    | NA                          | R01_cb16248_c2/flp0/1067    | NA                          | NA                          |
| R01_cb2803_c20/flp0/590     | NA                          | R01_cb2803_c20/flp0/590     | R01_cb2803_c20/flp0/590     | R01_cb2803_c20/flp0/590     |
| R01_cb5659_c101/f45p0/2187  | NA                          | NA                          | NA                          | R01_cb5659_c101/f45p0/2187  |
| R01_cb8564_c22153/flp0/2545 | NA                          | R01_cb8564_c22153/flp0/2545 | R01_cb8564_c22153/flp0/2545 | R01_cb8564_c22153/flp0/2545 |
| R01_cb12618_c0/f2p0/954     | NA                          | R01_cb12618_c0/f2p0/954     | NA                          | NA                          |
| R01_cb2344_c3/flp0/716      | NA                          | R01_cb2344_c3/flp0/716      | NA                          | NA                          |
| R01_cb1779_c5/flp0/3168     | NA                          | NA                          | NA                          | R01_cb1779_c5/flp0/3168     |
| R01_cb14522_c1/flp0/641     | NA                          | R01_cb14522_c1/flp0/641     | R01_cb14522_c1/flp0/641     | R01_cb14522_c1/flp0/641     |
| R01_cb17553_c5/flp1/368     | NA                          | R01_cb17553_c5/flp1/368     | R01_cb17553_c5/flp1/368     | R01_cb17553_c5/flp1/368     |
| R01_cb11124_c2/flp0/4565    | R01_cb11124_c2/flp0/4565    | R01_cb11124_c2/flp0/4565    | NA                          | NA                          |
| R01_cb18214_c2/flp0/1801    | NA                          | R01_cb18214_c2/flp0/1801    | NA                          | NA                          |
| R01_cb7741_c10/flp0/515     | R01_cb7741_c10/flp0/515     | R01_cb7741_c10/flp0/515     | R01_cb7741_c10/flp0/515     | R01_cb7741_c10/flp0/515     |
| R01_cb14579_c6/flp0/686     | NA                          | R01_cb14579_c6/flp0/686     | NA                          | NA                          |
| R01_cb14718_c1/flp0/1771    | NA                          | R01_cb14718_c1/flp0/1771    | NA                          | NA                          |

|                              |                             |                              |                             |                             |
|------------------------------|-----------------------------|------------------------------|-----------------------------|-----------------------------|
| R01_cb18456_c5328/flp0/695   | NA                          | R01_cb18456_c5328/flp0/695   | NA                          | NA                          |
| R01_cb742_c17/flp0/2527      | NA                          | R01_cb742_c17/flp0/2527      | NA                          | NA                          |
| R01_cb7828_c1/f2p0/2163      | NA                          | NA                           | NA                          | R01_cb7828_c1/f2p0/2163     |
| R01_cb3001_c0/flp0/3750      | NA                          | R01_cb3001_c0/flp0/3750      | NA                          | NA                          |
| R01_cb8564_c121926/flp0/1893 | NA                          | R01_cb8564_c121926/flp0/1893 | NA                          | NA                          |
| R01_cb3575_c3/f2p1/3187      | NA                          | NA                           | NA                          | R01_cb3575_c3/f2p1/3187     |
| R01_cb3941_c27/flp0/2126     | NA                          | NA                           | NA                          | R01_cb3941_c27/flp0/2126    |
| R01_cb8564_c72966/flp0/3209  | NA                          | R01_cb8564_c72966/flp0/3209  | R01_cb8564_c72966/flp0/3209 | R01_cb8564_c72966/flp0/3209 |
| R01_cb9061_c27/flp1/2278     | NA                          | NA                           | NA                          | R01_cb9061_c27/flp1/2278    |
| R01_cb326_c10/flp0/2712      | NA                          | NA                           | NA                          | R01_cb326_c10/flp0/2712     |
| R01_cb2729_c5/flp0/2525      | R01_cb2729_c5/flp0/2525     | R01_cb2729_c5/flp0/2525      | NA                          | R01_cb2729_c5/flp0/2525     |
| R01_cb8564_c84760/flp0/2389  | R01_cb8564_c84760/flp0/2389 | R01_cb8564_c84760/flp0/2389  | R01_cb8564_c84760/flp0/2389 | R01_cb8564_c84760/flp0/2389 |
| R01_cb8564_c87581/flp0/3082  | NA                          | R01_cb8564_c87581/flp0/3082  | R01_cb8564_c87581/flp0/3082 | R01_cb8564_c87581/flp0/3082 |
| R01_cb8564_c4910/flp0/2450   | R01_cb8564_c4910/flp0/2450  | R01_cb8564_c4910/flp0/2450   | R01_cb8564_c4910/flp0/2450  | R01_cb8564_c4910/flp0/2450  |
| R01_cb8564_c4666/f3p0/3234   | NA                          | R01_cb8564_c4666/f3p0/3234   | R01_cb8564_c4666/f3p0/3234  | R01_cb8564_c4666/f3p0/3234  |
| R01_cb5698_c5/flp0/2397      | R01_cb5698_c5/flp0/2397     | R01_cb5698_c5/flp0/2397      | NA                          | R01_cb5698_c5/flp0/2397     |
| R01_cb16937_c0/flp0/435      | R01_cb16937_c0/flp0/435     | R01_cb16937_c0/flp0/435      | NA                          | R01_cb16937_c0/flp0/435     |
| R01_cb5554_c5/flp0/2444      | R01_cb5554_c5/flp0/2444     | R01_cb5554_c5/flp0/2444      | R01_cb5554_c5/flp0/2444     | R01_cb5554_c5/flp0/2444     |
| R01_cb3398_c2/flp0/3309      | R01_cb3398_c2/flp0/3309     | R01_cb3398_c2/flp0/3309      | NA                          | NA                          |
| R01_cb17456_c0/flp0/1574     | NA                          | R01_cb17456_c0/flp0/1574     | NA                          | NA                          |
| R01_cb7257_c0/flp0/2663      | NA                          | NA                           | NA                          | R01_cb7257_c0/flp0/2663     |
| R01_cb12620_c17/f3p0/1192    | NA                          | NA                           | NA                          | R01_cb12620_c17/f3p0/1192   |
| R01_cb4493_c13/flp1/4300     | NA                          | NA                           | NA                          | R01_cb4493_c13/flp1/4300    |
| R01_cb11625_c1/flp0/2559     | NA                          | NA                           | NA                          | R01_cb11625_c1/flp0/2559    |

|                              |                           |                             |                             |                              |
|------------------------------|---------------------------|-----------------------------|-----------------------------|------------------------------|
| R01_cb9797_c36/flp0/2929     | NA                        | R01_cb9797_c36/flp0/2929    | NA                          | NA                           |
| R01_cb69_c27/flp1/1310       | NA                        | NA                          | NA                          | R01_cb69_c27/flp1/1310       |
| R01_cb1936_c2/flp0/2075      | R01_cb1936_c2/flp0/2075   | R01_cb1936_c2/flp0/2075     | R01_cb1936_c2/flp0/2075     | R01_cb1936_c2/flp0/2075      |
| R01_cb1031_c4/flp0/3637      | NA                        | NA                          | NA                          | R01_cb1031_c4/flp0/3637      |
| R01_cb6802_c72/flp0/2240     | NA                        | R01_cb6802_c72/flp0/2240    | NA                          | NA                           |
| R01_cb5259_c6/flp0/3922      | NA                        | NA                          | R01_cb5259_c6/flp0/3922     | R01_cb5259_c6/flp0/3922      |
| R01_cb13284_c13/flp0/1185    | NA                        | NA                          | NA                          | R01_cb13284_c13/flp0/1185    |
| R01_cb13692_c2/flp0/1508     | NA                        | R01_cb13692_c2/flp0/1508    | NA                          | NA                           |
| R01_cb18456_c6993/flp2/1172  | NA                        | NA                          | NA                          | R01_cb18456_c6993/flp2/1172  |
| R01_cb18409_c182/flp0/359    | R01_cb18409_c182/flp0/359 | R01_cb18409_c182/flp0/359   | R01_cb18409_c182/flp0/359   | R01_cb18409_c182/flp0/359    |
| R01_cb8564_c12707/flp0/3555  | NA                        | R01_cb8564_c12707/flp0/3555 | R01_cb8564_c12707/flp0/3555 | R01_cb8564_c12707/flp0/3555  |
| R01_cb8564_c17790/flp0/2283  | NA                        | NA                          | NA                          | R01_cb8564_c17790/flp0/2283  |
| R01_cb5498_c1/flp0/3651      | NA                        | R01_cb5498_c1/flp0/3651     | R01_cb5498_c1/flp0/3651     | NA                           |
| R01_cb6059_c1/flp0/1894      | NA                        | NA                          | NA                          | R01_cb6059_c1/flp0/1894      |
| R01_cb8868_c1/flp1/2171      | NA                        | R01_cb8868_c1/flp1/2171     | R01_cb8868_c1/flp1/2171     | R01_cb8868_c1/flp1/2171      |
| R01_cb8564_c79187/flp0/2963  | NA                        | R01_cb8564_c79187/flp0/2963 | R01_cb8564_c79187/flp0/2963 | R01_cb8564_c79187/flp0/2963  |
| R01_cb5168_c2/flp0/3330      | NA                        | R01_cb5168_c2/flp0/3330     | R01_cb5168_c2/flp0/3330     | R01_cb5168_c2/flp0/3330      |
| R01_cb8564_c126032/flp0/3058 | NA                        | NA                          | NA                          | R01_cb8564_c126032/flp0/3058 |
| R01_cb10243_c4/flp0/829      | R01_cb10243_c4/flp0/829   | R01_cb10243_c4/flp0/829     | R01_cb10243_c4/flp0/829     | R01_cb10243_c4/flp0/829      |
| R01_cb1487_c5/flp0/1318      | NA                        | NA                          | NA                          | R01_cb1487_c5/flp0/1318      |
| R01_cb6602_c25/flp0/2937     | NA                        | R01_cb6602_c25/flp0/2937    | NA                          | R01_cb6602_c25/flp0/2937     |
| R01_cb8564_c35145/f2p0/3283  | NA                        | R01_cb8564_c35145/f2p0/3283 | NA                          | NA                           |
| R01_cb6529_c3/flp0/2068      | NA                        | NA                          | NA                          | R01_cb6529_c3/flp0/2068      |
| R01_cb2845_c6/flp0/4170      | NA                        | NA                          | NA                          | R01_cb2845_c6/flp0/4170      |
| R01_cb13726_c0/f2p1/1081     | NA                        | NA                          | NA                          | R01_cb13726_c0/f2p1/1081     |

|                             |                             |                             |                             |                             |
|-----------------------------|-----------------------------|-----------------------------|-----------------------------|-----------------------------|
| R01_cb3046_c9/flp2/2311     | NA                          | R01_cb3046_c9/flp2/2311     | NA                          | R01_cb3046_c9/flp2/2311     |
| R01_cb454_c13/flp0/2437     | NA                          | NA                          | NA                          | R01_cb454_c13/flp0/2437     |
| R01_cb8564_c22011/flp0/3477 | NA                          | R01_cb8564_c22011/flp0/3477 | R01_cb8564_c22011/flp0/3477 | R01_cb8564_c22011/flp0/3477 |
| R01_cb15760_c1/flp0/636     | R01_cb15760_c1/flp0/636     | R01_cb15760_c1/flp0/636     | R01_cb15760_c1/flp0/636     | R01_cb15760_c1/flp0/636     |
| R01_cb12972_c31/flp0/621    | NA                          | R01_cb12972_c31/flp0/621    | R01_cb12972_c31/flp0/621    | R01_cb12972_c31/flp0/621    |
| R01_cb17749_c0/f2p0/489     | NA                          | R01_cb17749_c0/f2p0/489     | R01_cb17749_c0/f2p0/489     | R01_cb17749_c0/f2p0/489     |
| R01_cb16342_c0/f2p0/560     | NA                          | R01_cb16342_c0/f2p0/560     | R01_cb16342_c0/f2p0/560     | R01_cb16342_c0/f2p0/560     |
| R01_cb5331_c0/f2p0/3049     | NA                          | R01_cb5331_c0/f2p0/3049     | NA                          | NA                          |
| R01_cb8564_c76721/flp0/2245 | R01_cb8564_c76721/flp0/2245 | R01_cb8564_c76721/flp0/2245 | NA                          | NA                          |
| R01_cb15714_c2/flp0/483     | NA                          | R01_cb15714_c2/flp0/483     | NA                          | NA                          |
| R01_cb11870_c1/flp0/360     | R01_cb11870_c1/flp0/360     | R01_cb11870_c1/flp0/360     | R01_cb11870_c1/flp0/360     | R01_cb11870_c1/flp0/360     |
| R01_cb4047_c18/fl4p4/2895   | NA                          | NA                          | NA                          | R01_cb4047_c18/fl4p4/2895   |
| R01_cb2870_c6/flp1/3040     | NA                          | NA                          | NA                          | R01_cb2870_c6/flp1/3040     |
| R01_cb7507_c10/flp0/2506    | NA                          | R01_cb7507_c10/flp0/2506    | NA                          | NA                          |
| R01_cb17973_c37/flp0/399    | R01_cb17973_c37/flp0/399    | R01_cb17973_c37/flp0/399    | R01_cb17973_c37/flp0/399    | NA                          |
| R01_cb13990_c1/flp0/926     | R01_cb13990_c1/flp0/926     | R01_cb13990_c1/flp0/926     | NA                          | R01_cb13990_c1/flp0/926     |
| R01_cb15186_c22/flp0/530    | R01_cb15186_c22/flp0/530    | R01_cb15186_c22/flp0/530    | R01_cb15186_c22/flp0/530    | NA                          |
| R01_cb15578_c3/flp0/702     | NA                          | R01_cb15578_c3/flp0/702     | NA                          | R01_cb15578_c3/flp0/702     |
| R01_cb12603_c9/flp1/1411    | NA                          | R01_cb12603_c9/flp1/1411    | R01_cb12603_c9/flp1/1411    | R01_cb12603_c9/flp1/1411    |
| R01_cb2445_c6/f2p0/3518     | NA                          | NA                          | NA                          | R01_cb2445_c6/f2p0/3518     |
| R01_cb3352_c2/flp0/3409     | NA                          | R01_cb3352_c2/flp0/3409     | NA                          | NA                          |
| R01_cb9617_c6/flp2/1946     | NA                          | NA                          | NA                          | R01_cb9617_c6/flp2/1946     |
| R01_cb16831_c1/f2p0/729     | NA                          | NA                          | NA                          | R01_cb16831_c1/f2p0/729     |
| R01_cb454_c2/f4p0/2393      | NA                          | NA                          | NA                          | R01_cb454_c2/f4p0/2393      |
| R01_cb17981_c2/flp0/417     | R01_cb17981_c2/flp0/417     | R01_cb17981_c2/flp0/417     | NA                          | R01_cb17981_c2/flp0/417     |



|                                  |                                   |                                  |                                  |                             |
|----------------------------------|-----------------------------------|----------------------------------|----------------------------------|-----------------------------|
| R01_cb10343_c2/flp0/1518         | R01_cb10343_c2/flp0/1518          | R01_cb10343_c2/flp0/1518         | R01_cb10343_c2/flp0/1518         | NA                          |
| R01_cb2854_c48/flp0/2955         | NA                                | R01_cb2854_c48/flp0/2955         | NA                               | NA                          |
| R01_cb8564_c86285/flp0/2375      | NA                                | NA                               | NA                               | R01_cb8564_c86285/flp0/2375 |
| R01_cb6571_c4/flp0/1506          | NA                                | R01_cb6571_c4/flp0/1506          | NA                               | R01_cb6571_c4/flp0/1506     |
| R01_cb10338_c6/flp0/1350         | NA                                | R01_cb10338_c6/flp0/1350         | NA                               | NA                          |
| R01_cb7164_c1/flp0/4448          | NA                                | NA                               | NA                               | R01_cb7164_c1/flp0/4448     |
| R01_cb4169_c10/flp0/1452         | NA                                | NA                               | NA                               | R01_cb4169_c10/flp0/1452    |
| R01_cb1676_c9/flp0/594           | NA                                | R01_cb1676_c9/flp0/594           | NA                               | NA                          |
| R01_cb12575_c5/f3p0/968          | NA                                | NA                               | NA                               | R01_cb12575_c5/f3p0/968     |
| R01_cb14955_c4/f6p1/1054         | NA                                | NA                               | NA                               | R01_cb14955_c4/f6p1/1054    |
| R01_cb10015_c188/flp0/586        | R01_cb10015_c188/flp0/586         | R01_cb10015_c188/flp0/586        | R01_cb10015_c188/flp0/586        | R01_cb10015_c188/flp0/586   |
| R01_cb8564_c120117/flp0/267<br>2 | R01_cb8564_c120117/flp0/267<br>72 | R01_cb8564_c120117/flp0/267<br>2 | R01_cb8564_c120117/flp0/267<br>2 | NA                          |
| R01_cb8564_c21995/flp0/2135      | R01_cb8564_c21995/flp0/2135<br>5  | R01_cb8564_c21995/flp0/2135      | NA                               | NA                          |
| R01_cb2104_c9/flp0/2916          | NA                                | NA                               | R01_cb2104_c9/flp0/2916          | R01_cb2104_c9/flp0/2916     |
| R01_cb2676_c7/flp0/2966          | NA                                | NA                               | NA                               | R01_cb2676_c7/flp0/2966     |
| R01_cb6959_c0/f2p0/2357          | NA                                | NA                               | NA                               | R01_cb6959_c0/f2p0/2357     |
| R01_cb8564_c82244/flp3/3163      | NA                                | R01_cb8564_c82244/flp3/3163      | NA                               | NA                          |
| R01_cb1614_c5/flp0/2234          | NA                                | NA                               | NA                               | R01_cb1614_c5/flp0/2234     |
| R01_cb8564_c126515/flp0/248<br>7 | R01_cb8564_c126515/flp0/248<br>87 | R01_cb8564_c126515/flp0/248<br>7 | NA                               | NA                          |
| R01_cb8564_c4070/flp0/2882       | NA                                | R01_cb8564_c4070/flp0/2882       | NA                               | R01_cb8564_c4070/flp0/2882  |
| R01_cb17670_c0/flp0/444          | R01_cb17670_c0/flp0/444           | R01_cb17670_c0/flp0/444          | R01_cb17670_c0/flp0/444          | R01_cb17670_c0/flp0/444     |
| R01_cb385_c8/flp1/9473           | R01_cb385_c8/flp1/9473            | NA                               | NA                               | NA                          |
| R01_cb18150_c3/flp0/1737         | NA                                | R01_cb18150_c3/flp0/1737         | R01_cb18150_c3/flp0/1737         | R01_cb18150_c3/flp0/1737    |

|                             |                             |                             |                          |                             |
|-----------------------------|-----------------------------|-----------------------------|--------------------------|-----------------------------|
| R01_cb11924_c22/flp2/514    | R01_cb11924_c22/flp2/514    | R01_cb11924_c22/flp2/514    | R01_cb11924_c22/flp2/514 | NA                          |
| R01_cb8564_c107873/f2p0/361 | R01_cb8564_c107873/f2p0/361 | R01_cb8564_c107873/f2p0/361 | NA                       | NA                          |
| 5                           | 15                          | 5                           |                          |                             |
| R01_cb10968_c0/f5p1/605     | NA                          | R01_cb10968_c0/f5p1/605     | R01_cb10968_c0/f5p1/605  | R01_cb10968_c0/f5p1/605     |
| R01_cb4923_c14/flp0/1430    | NA                          | R01_cb4923_c14/flp0/1430    | NA                       | R01_cb4923_c14/flp0/1430    |
| R01_cb7502_c13/flp1/2270    | NA                          | NA                          | R01_cb7502_c13/flp1/2270 | R01_cb7502_c13/flp1/2270    |
| R01_cb10593_c1/flp0/3134    | NA                          | R01_cb10593_c1/flp0/3134    | R01_cb10593_c1/flp0/3134 | NA                          |
| R01_cb16678_c7/flp0/1720    | NA                          | R01_cb16678_c7/flp0/1720    | R01_cb16678_c7/flp0/1720 | R01_cb16678_c7/flp0/1720    |
| R01_cb11522_c2/flp0/802     | NA                          | R01_cb11522_c2/flp0/802     | NA                       | R01_cb11522_c2/flp0/802     |
| R01_cb12750_c3/flp0/621     | NA                          | R01_cb12750_c3/flp0/621     | NA                       | R01_cb12750_c3/flp0/621     |
| R01_cb8809_c1/fl0p2/2405    | NA                          | NA                          | NA                       | R01_cb8809_c1/fl0p2/2405    |
| R01_cb8564_c89534/flp0/2521 | NA                          | R01_cb8564_c89534/flp0/2521 | NA                       | NA                          |
| R01_cb14004_c14/flp1/1355   | NA                          | NA                          | NA                       | R01_cb14004_c14/flp1/1355   |
| R01_cb12365_c1/f5p0/651     | NA                          | R01_cb12365_c1/f5p0/651     | NA                       | NA                          |
| R01_cb16321_c3/flp0/1486    | R01_cb16321_c3/flp0/1486    | R01_cb16321_c3/flp0/1486    | NA                       | R01_cb16321_c3/flp0/1486    |
| R01_cb18373_c0/flp0/1573    | NA                          | R01_cb18373_c0/flp0/1573    | R01_cb18373_c0/flp0/1573 | R01_cb18373_c0/flp0/1573    |
| R01_cb4368_c13/flp0/517     | NA                          | NA                          | R01_cb4368_c13/flp0/517  | R01_cb4368_c13/flp0/517     |
| R01_cb8564_c71574/flp0/3073 | NA                          | R01_cb8564_c71574/flp0/3073 | NA                       | NA                          |
| R01_cb17997_c7/f2p1/919     | NA                          | NA                          | NA                       | R01_cb17997_c7/f2p1/919     |
| R01_cb11703_c1/flp0/2075    | NA                          | R01_cb11703_c1/flp0/2075    | R01_cb11703_c1/flp0/2075 | NA                          |
| R01_cb12195_c3/flp1/1611    | NA                          | R01_cb12195_c3/flp1/1611    | NA                       | NA                          |
| R01_cb4952_c2/flp0/3420     | NA                          | NA                          | NA                       | R01_cb4952_c2/flp0/3420     |
| R01_cb10383_c2/flp0/364     | NA                          | NA                          | R01_cb10383_c2/flp0/364  | R01_cb10383_c2/flp0/364     |
| R01_cb8564_c122886/flp1/274 | NA                          | R01_cb8564_c122886/flp1/274 | NA                       | R01_cb8564_c122886/flp1/274 |
| 8                           |                             | 8                           |                          | 8                           |
| R01_cb7757_c10/flp1/1977    | NA                          | NA                          | R01_cb7757_c10/flp1/1977 | R01_cb7757_c10/flp1/1977    |

|                             |                             |                             |                             |                             |
|-----------------------------|-----------------------------|-----------------------------|-----------------------------|-----------------------------|
| R01_cb8564_c23893/flp0/4543 | R01_cb8564_c23893/flp0/4543 | R01_cb8564_c23893/flp0/4543 | R01_cb8564_c23893/flp0/4543 | R01_cb8564_c23893/flp0/4543 |
| R01_cb10865_c1/flp0/3004    | NA                          | R01_cb10865_c1/flp0/3004    | NA                          | R01_cb10865_c1/flp0/3004    |
| R01_cb18409_c53/flp0/1144   | R01_cb18409_c53/flp0/1144   | R01_cb18409_c53/flp0/1144   | R01_cb18409_c53/flp0/1144   | R01_cb18409_c53/flp0/1144   |
| R01_cb13875_c5/flp1/1301    | NA                          | NA                          | NA                          | R01_cb13875_c5/flp1/1301    |
| R01_cb4768_c17/flp1/2380    | NA                          | R01_cb4768_c17/flp1/2380    | NA                          | NA                          |
| R01_cb14968_c17/flp0/1774   | NA                          | NA                          | NA                          | R01_cb14968_c17/flp0/1774   |
| R01_cb16828_c1/flp0/1216    | NA                          | R01_cb16828_c1/flp0/1216    | NA                          | NA                          |
| R01_cb8564_c123310/flp0/240 | R01_cb8564_c123310/flp0/240 | R01_cb8564_c123310/flp0/240 | R01_cb8564_c123310/flp0/240 | R01_cb8564_c123310/flp0/240 |
| R01_cb12722_c4/f3p5/1707    | NA                          | NA                          | NA                          | R01_cb12722_c4/f3p5/1707    |
| R01_cb12786_c11/flp1/726    | NA                          | R01_cb12786_c11/flp1/726    | NA                          | R01_cb12786_c11/flp1/726    |
| R01_cb17993_c0/flp0/421     | R01_cb17993_c0/flp0/421     | R01_cb17993_c0/flp0/421     | R01_cb17993_c0/flp0/421     | R01_cb17993_c0/flp0/421     |
| R01_cb8564_c3077/flp0/3195  | NA                          | R01_cb8564_c3077/flp0/3195  | R01_cb8564_c3077/flp0/3195  | R01_cb8564_c3077/flp0/3195  |
| R01_cb8564_c73271/f2p1/2234 | R01_cb8564_c73271/f2p1/2234 | R01_cb8564_c73271/f2p1/2234 | R01_cb8564_c73271/f2p1/2234 | R01_cb8564_c73271/f2p1/2234 |
| R01_cb17216_c3/flp0/443     | R01_cb17216_c3/flp0/443     | R01_cb17216_c3/flp0/443     | R01_cb17216_c3/flp0/443     | R01_cb17216_c3/flp0/443     |
| R01_cb16852_c1/flp0/1143    | NA                          | R01_cb16852_c1/flp0/1143    | NA                          | NA                          |
| R01_cb14560_c8/flp0/765     | NA                          | NA                          | NA                          | R01_cb14560_c8/flp0/765     |
| R01_cb10952_c0/f2p0/1453    | NA                          | NA                          | NA                          | R01_cb10952_c0/f2p0/1453    |
| R01_cb18427_c1/flp0/628     | NA                          | NA                          | NA                          | R01_cb18427_c1/flp0/628     |
| R01_cb1333_c71/flp0/2902    | NA                          | R01_cb1333_c71/flp0/2902    | R01_cb1333_c71/flp0/2902    | NA                          |
| R01_cb8564_c86753/flp0/3161 | NA                          | NA                          | NA                          | R01_cb8564_c86753/flp0/3161 |
| R01_cb9650_c0/flp0/2021     | R01_cb9650_c0/flp0/2021     | R01_cb9650_c0/flp0/2021     | R01_cb9650_c0/flp0/2021     | R01_cb9650_c0/flp0/2021     |
| R01_cb14131_c5/flp0/1228    | NA                          | NA                          | NA                          | R01_cb14131_c5/flp0/1228    |
| R01_cb7663_c4/flp0/2878     | NA                          | NA                          | NA                          | R01_cb7663_c4/flp0/2878     |

|                                   |                                   |                                   |                                   |                                   |
|-----------------------------------|-----------------------------------|-----------------------------------|-----------------------------------|-----------------------------------|
| R01_cb11036_c1/flp0/1951          | NA                                | R01_cb11036_c1/flp0/1951          | NA                                | NA                                |
| R01_cb17973_c52/flp0/1770         | NA                                | R01_cb17973_c52/flp0/1770         | NA                                | R01_cb17973_c52/flp0/1770         |
| R01_cb8564_c149971/flp13/48<br>27 | NA                                | R01_cb8564_c149971/flp13/48<br>27 | R01_cb8564_c149971/flp13/48<br>27 | R01_cb8564_c149971/flp13/48<br>27 |
| R01_cb16556_c3/flp0/1419          | NA                                | NA                                | NA                                | R01_cb16556_c3/flp0/1419          |
| R01_cb10916_c0/flp0/686           | NA                                | NA                                | NA                                | R01_cb10916_c0/flp0/686           |
| R01_cb7927_c1/flp0/2046           | NA                                | NA                                | NA                                | R01_cb7927_c1/flp0/2046           |
| R01_cb8564_c107823/f3p0/338<br>9  | NA                                | NA                                | NA                                | R01_cb8564_c107823/f3p0/338<br>9  |
| R01_cb17458_c0/f2p0/638           | NA                                | NA                                | NA                                | R01_cb17458_c0/f2p0/638           |
| R01_cb13765_c0/f2p0/660           | NA                                | NA                                | R01_cb13765_c0/f2p0/660           | R01_cb13765_c0/f2p0/660           |
| R01_cb381_c5/flp0/1422            | NA                                | R01_cb381_c5/flp0/1422            | NA                                | NA                                |
| R01_cb8564_c130287/flp0/258<br>7  | R01_cb8564_c130287/flp0/258<br>87 | R01_cb8564_c130287/flp0/258<br>7  | R01_cb8564_c130287/flp0/258<br>7  | R01_cb8564_c130287/flp0/258<br>7  |
| R01_cb15335_c1/flp0/896           | NA                                | R01_cb15335_c1/flp0/896           | NA                                | NA                                |
| R01_cb17644_c0/flp0/711           | R01_cb17644_c0/flp0/711           | R01_cb17644_c0/flp0/711           | R01_cb17644_c0/flp0/711           | R01_cb17644_c0/flp0/711           |
| R01_cb8564_c77607/flp1/2082       | NA                                | R01_cb8564_c77607/flp1/2082       | NA                                | NA                                |
| R01_cb8564_c17273/f2p0/3222       | NA                                | R01_cb8564_c17273/f2p0/3222       | R01_cb8564_c17273/f2p0/3222       | R01_cb8564_c17273/f2p0/3222       |
| R01_cb17792_c2/flp0/1259          | NA                                | NA                                | NA                                | R01_cb17792_c2/flp0/1259          |
| R01_cb1459_c2/flp1/4317           | NA                                | R01_cb1459_c2/flp1/4317           | NA                                | NA                                |
| R01_cb7986_c17/flp0/2091          | NA                                | R01_cb7986_c17/flp0/2091          | NA                                | NA                                |
| R01_cb6281_c2/flp0/1039           | NA                                | NA                                | NA                                | R01_cb6281_c2/flp0/1039           |
| R01_cb18456_c6793/flp0/649        | NA                                | R01_cb18456_c6793/flp0/649        | R01_cb18456_c6793/flp0/649        | R01_cb18456_c6793/flp0/649        |
| R01_cb10993_c0/flp0/1345          | NA                                | NA                                | NA                                | R01_cb10993_c0/flp0/1345          |
| R01_cb2895_c5/flp0/1683           | NA                                | R01_cb2895_c5/flp0/1683           | NA                                | NA                                |
| R01_cb16646_c0/flp0/1068          | NA                                | NA                                | NA                                | R01_cb16646_c0/flp0/1068          |

|                             |                          |                             |                             |                             |
|-----------------------------|--------------------------|-----------------------------|-----------------------------|-----------------------------|
| R01_cb15312_c2/flp0/728     | NA                       | R01_cb15312_c2/flp0/728     | R01_cb15312_c2/flp0/728     | R01_cb15312_c2/flp0/728     |
| R01_cb13704_c2/flp0/1392    | NA                       | R01_cb13704_c2/flp0/1392    | NA                          | NA                          |
| R01_cb18409_c40/flp0/1884   | NA                       | R01_cb18409_c40/flp0/1884   | R01_cb18409_c40/flp0/1884   | NA                          |
| R01_cb506_c8/flp0/2351      | NA                       | NA                          | R01_cb506_c8/flp0/2351      | R01_cb506_c8/flp0/2351      |
| R01_cb8564_c19077/flp2/4634 | NA                       | R01_cb8564_c19077/flp2/4634 | R01_cb8564_c19077/flp2/4634 | R01_cb8564_c19077/flp2/4634 |
| R01_cb2183_c1/f3p0/3312     | NA                       | NA                          | R01_cb2183_c1/f3p0/3312     | R01_cb2183_c1/f3p0/3312     |
| R01_cb17697_c1/flp0/647     | NA                       | NA                          | R01_cb17697_c1/flp0/647     | R01_cb17697_c1/flp0/647     |
| R01_cb11624_c1/flp0/3523    | R01_cb11624_c1/flp0/3523 | R01_cb11624_c1/flp0/3523    | R01_cb11624_c1/flp0/3523    | R01_cb11624_c1/flp0/3523    |
| R01_cb11245_c3/flp0/1718    | NA                       | R01_cb11245_c3/flp0/1718    | NA                          | NA                          |
| R01_cb8564_c116270/flp0/259 | NA                       | R01_cb8564_c116270/flp0/259 | R01_cb8564_c116270/flp0/259 | R01_cb8564_c116270/flp0/259 |
| 6                           |                          | 6                           | 6                           | 6                           |
| R01_cb7611_c4/flp0/2712     | NA                       | NA                          | NA                          | R01_cb7611_c4/flp0/2712     |
| R01_cb8564_c4475/flp0/2475  | NA                       | R01_cb8564_c4475/flp0/2475  | NA                          | NA                          |
| R01_cb5929_c7/flp1/2665     | NA                       | NA                          | NA                          | R01_cb5929_c7/flp1/2665     |
| R01_cb12686_c1/flp0/447     | NA                       | NA                          | NA                          | R01_cb12686_c1/flp0/447     |
| R01_cb8564_c71789/flp0/2971 | NA                       | R01_cb8564_c71789/flp0/2971 | NA                          | R01_cb8564_c71789/flp0/2971 |
| R01_cb2763_c0/flp0/3814     | NA                       | R01_cb2763_c0/flp0/3814     | NA                          | NA                          |
| R01_cb8564_c3169/flp0/3080  | NA                       | R01_cb8564_c3169/flp0/3080  | NA                          | NA                          |
| R01_cb5705_c3/flp3/2535     | NA                       | R01_cb5705_c3/flp3/2535     | R01_cb5705_c3/flp3/2535     | NA                          |
| R01_cb84_c13/flp0/5191      | NA                       | R01_cb84_c13/flp0/5191      | NA                          | NA                          |
| R01_cb6601_c0/f2p0/959      | NA                       | R01_cb6601_c0/f2p0/959      | NA                          | NA                          |
| R01_cb8564_c80479/flp0/2462 | NA                       | R01_cb8564_c80479/flp0/2462 | R01_cb8564_c80479/flp0/2462 | R01_cb8564_c80479/flp0/2462 |
| R01_cb11106_c3/flp0/629     | NA                       | R01_cb11106_c3/flp0/629     | R01_cb11106_c3/flp0/629     | R01_cb11106_c3/flp0/629     |
| R01_cb2851_c10/flp0/2281    | NA                       | NA                          | NA                          | R01_cb2851_c10/flp0/2281    |
| R01_cb2536_c13/flp0/2887    | R01_cb2536_c13/flp0/2887 | R01_cb2536_c13/flp0/2887    | NA                          | NA                          |
| R01_cb16413_c1/flp0/787     | R01_cb16413_c1/flp0/787  | R01_cb16413_c1/flp0/787     | R01_cb16413_c1/flp0/787     | R01_cb16413_c1/flp0/787     |

|                             |    |                             |                             |                             |
|-----------------------------|----|-----------------------------|-----------------------------|-----------------------------|
| R01_cb8564_c9914/f2p1/3768  | NA | R01_cb8564_c9914/f2p1/3768  | NA                          | R01_cb8564_c9914/f2p1/3768  |
| R01_cb8173_c15/f83p4/1211   | NA | R01_cb8173_c15/f83p4/1211   | R01_cb8173_c15/f83p4/1211   | R01_cb8173_c15/f83p4/1211   |
| R01_cb5896_c142/f1p0/3587   | NA | R01_cb5896_c142/f1p0/3587   | NA                          | NA                          |
| R01_cb12554_c2/f1p1/1592    | NA | NA                          | NA                          | R01_cb12554_c2/f1p1/1592    |
| R01_cb7472_c1/f1p0/2353     | NA | NA                          | NA                          | R01_cb7472_c1/f1p0/2353     |
| R01_cb5327_c3/f1p0/2049     | NA | R01_cb5327_c3/f1p0/2049     | R01_cb5327_c3/f1p0/2049     | NA                          |
| R01_cb510_c7/f1p0/3515      | NA | NA                          | NA                          | R01_cb510_c7/f1p0/3515      |
| R01_cb11509_c2/f1p0/1979    | NA | R01_cb11509_c2/f1p0/1979    | NA                          | R01_cb11509_c2/f1p0/1979    |
| R01_cb8564_c25493/f1p2/2246 | NA | R01_cb8564_c25493/f1p2/2246 | NA                          | R01_cb8564_c25493/f1p2/2246 |
| R01_cb1119_c13/f1p0/3370    | NA | R01_cb1119_c13/f1p0/3370    | NA                          | NA                          |
| R01_cb14067_c5/f1p0/1824    | NA | R01_cb14067_c5/f1p0/1824    | R01_cb14067_c5/f1p0/1824    | R01_cb14067_c5/f1p0/1824    |
| R01_cb16984_c0/f2p0/1439    | NA | NA                          | NA                          | R01_cb16984_c0/f2p0/1439    |
| R01_cb12402_c2/f1p0/642     | NA | R01_cb12402_c2/f1p0/642     | R01_cb12402_c2/f1p0/642     | R01_cb12402_c2/f1p0/642     |
| R01_cb17973_c22/f1p0/750    | NA | R01_cb17973_c22/f1p0/750    | R01_cb17973_c22/f1p0/750    | R01_cb17973_c22/f1p0/750    |
| R01_cb8564_c91417/f2p0/2105 | NA | R01_cb8564_c91417/f2p0/2105 | R01_cb8564_c91417/f2p0/2105 | R01_cb8564_c91417/f2p0/2105 |
| R01_cb13938_c7/f2p0/1237    | NA | NA                          | NA                          | R01_cb13938_c7/f2p0/1237    |
| R01_cb8564_c151509/f1p0/280 | NA | R01_cb8564_c151509/f1p0/280 | NA                          | NA                          |
| 1                           |    | 1                           |                             |                             |
| R01_cb17973_c34/f1p0/741    | NA | R01_cb17973_c34/f1p0/741    | R01_cb17973_c34/f1p0/741    | NA                          |
| R01_cb1683_c30/f1p0/2666    | NA | R01_cb1683_c30/f1p0/2666    | NA                          | NA                          |
| R01_cb8564_c116077/f1p0/261 | NA | R01_cb8564_c116077/f1p0/261 | NA                          | NA                          |
| 8                           |    | 8                           |                             |                             |
| R01_cb5815_c3/f1p0/2886     | NA | NA                          | NA                          | R01_cb5815_c3/f1p0/2886     |
| R01_cb8564_c81339/f1p0/2660 | NA | NA                          | NA                          | R01_cb8564_c81339/f1p0/2660 |
| R01_cb16662_c6/f1p0/5962    | NA | NA                          | R01_cb16662_c6/f1p0/5962    | NA                          |
| R01_cb5755_c3/f1p0/2933     | NA | R01_cb5755_c3/f1p0/2933     | NA                          | NA                          |

|                              |                            |                              |                             |                             |
|------------------------------|----------------------------|------------------------------|-----------------------------|-----------------------------|
| R01_cb17901_c1/flp0/960      | R01_cb17901_c1/flp0/960    | R01_cb17901_c1/flp0/960      | R01_cb17901_c1/flp0/960     | R01_cb17901_c1/flp0/960     |
| R01_cb15125_c1/flp0/747      | R01_cb15125_c1/flp0/747    | R01_cb15125_c1/flp0/747      | R01_cb15125_c1/flp0/747     | R01_cb15125_c1/flp0/747     |
| R01_cb8564_c115345/flp0/2353 | NA                         | R01_cb8564_c115345/flp0/2353 | NA                          | NA                          |
| R01_cb8564_c68606/f3p0/2311  | NA                         | NA                           | R01_cb8564_c68606/f3p0/2311 | R01_cb8564_c68606/f3p0/2311 |
| R01_cb8564_c10172/flp0/2353  | NA                         | NA                           | NA                          | R01_cb8564_c10172/flp0/2353 |
| R01_cb8120_c3/flp0/2751      | NA                         | NA                           | NA                          | R01_cb8120_c3/flp0/2751     |
| R01_cb17139_c3/flp1/1263     | NA                         | NA                           | NA                          | R01_cb17139_c3/flp1/1263    |
| R01_cb4293_c25/flp0/3171     | NA                         | R01_cb4293_c25/flp0/3171     | NA                          | NA                          |
| R01_cb17086_c2/flp0/1302     | NA                         | R01_cb17086_c2/flp0/1302     | NA                          | R01_cb17086_c2/flp0/1302    |
| R01_cb18456_c7212/flp0/509   | R01_cb18456_c7212/flp0/509 | R01_cb18456_c7212/flp0/509   | R01_cb18456_c7212/flp0/509  | R01_cb18456_c7212/flp0/509  |
| R01_cb1376_c10/flp0/2448     | R01_cb1376_c10/flp0/2448   | R01_cb1376_c10/flp0/2448     | R01_cb1376_c10/flp0/2448    | R01_cb1376_c10/flp0/2448    |
| R01_cb8564_c128241/flp0/2723 | NA                         | R01_cb8564_c128241/flp0/2723 | NA                          | NA                          |
| R01_cb11287_c1/flp0/3609     | NA                         | NA                           | NA                          | R01_cb11287_c1/flp0/3609    |
| R01_cb7748_c2/f2p0/2406      | NA                         | R01_cb7748_c2/f2p0/2406      | NA                          | NA                          |
| R01_cb14633_c0/f3p1/917      | NA                         | NA                           | NA                          | R01_cb14633_c0/f3p1/917     |
| R01_cb4891_c1/flp0/3228      | NA                         | NA                           | NA                          | R01_cb4891_c1/flp0/3228     |
| R01_cb2701_c2/flp0/3840      | R01_cb2701_c2/flp0/3840    | R01_cb2701_c2/flp0/3840      | NA                          | R01_cb2701_c2/flp0/3840     |
| R01_cb8564_c77521/flp0/2505  | NA                         | R01_cb8564_c77521/flp0/2505  | NA                          | NA                          |
| R01_cb14351_c0/fl3p0/739     | NA                         | NA                           | NA                          | R01_cb14351_c0/fl3p0/739    |
| R01_cb18456_c2286/flp0/708   | NA                         | R01_cb18456_c2286/flp0/708   | R01_cb18456_c2286/flp0/708  | R01_cb18456_c2286/flp0/708  |
| R01_cb1190_c2/flp0/2447      | NA                         | R01_cb1190_c2/flp0/2447      | NA                          | NA                          |
| R01_cb18456_c342/flp6/960    | NA                         | R01_cb18456_c342/flp6/960    | NA                          | NA                          |
| R01_cb14352_c0/f2p0/976      | NA                         | NA                           | R01_cb14352_c0/f2p0/976     | R01_cb14352_c0/f2p0/976     |
| R01_cb3363_c17/flp0/1084     | NA                         | NA                           | NA                          | R01_cb3363_c17/flp0/1084    |

|                              |                            |                             |                             |                              |
|------------------------------|----------------------------|-----------------------------|-----------------------------|------------------------------|
| R01_cb5717_c6/flp0/3822      | NA                         | NA                          | NA                          | R01_cb5717_c6/flp0/3822      |
| R01_cb9325_c0/flp0/2118      | NA                         | R01_cb9325_c0/flp0/2118     | R01_cb9325_c0/flp0/2118     | R01_cb9325_c0/flp0/2118      |
| R01_cb18346_c0/flp0/1620     | NA                         | R01_cb18346_c0/flp0/1620    | R01_cb18346_c0/flp0/1620    | NA                           |
| R01_cb15116_c0/fl4p0/995     | NA                         | NA                          | NA                          | R01_cb15116_c0/fl4p0/995     |
| R01_cb8564_c75018/flp0/2051  | NA                         | R01_cb8564_c75018/flp0/2051 | NA                          | R01_cb8564_c75018/flp0/2051  |
| R01_cb8564_c117577/flp2/2076 | NA                         | NA                          | NA                          | R01_cb8564_c117577/flp2/2076 |
| R01_cb8564_c138590/flp1/2653 | NA                         | NA                          | NA                          | R01_cb8564_c138590/flp1/2653 |
| R01_cb14982_c3/flp0/673      | NA                         | R01_cb14982_c3/flp0/673     | R01_cb14982_c3/flp0/673     | R01_cb14982_c3/flp0/673      |
| R01_cb8564_c76250/flp1/3808  | NA                         | NA                          | NA                          | R01_cb8564_c76250/flp1/3808  |
| R01_cb454_c33/flp0/2337      | NA                         | NA                          | NA                          | R01_cb454_c33/flp0/2337      |
| R01_cb3793_c2/flp0/3376      | NA                         | NA                          | NA                          | R01_cb3793_c2/flp0/3376      |
| R01_cb10578_c1/flp0/3966     | NA                         | NA                          | NA                          | R01_cb10578_c1/flp0/3966     |
| R01_cb18762_c1/flp0/4297     | NA                         | R01_cb18762_c1/flp0/4297    | R01_cb18762_c1/flp0/4297    | R01_cb18762_c1/flp0/4297     |
| R01_cb12003_c142/flp2/1168   | NA                         | R01_cb12003_c142/flp2/1168  | NA                          | NA                           |
| R01_cb8564_c33844/f4p0/2678  | NA                         | NA                          | NA                          | R01_cb8564_c33844/f4p0/2678  |
| R01_cb9052_c0/flp0/2202      | NA                         | NA                          | NA                          | R01_cb9052_c0/flp0/2202      |
| R01_cb8564_c71557/flp1/3111  | NA                         | R01_cb8564_c71557/flp1/3111 | NA                          | NA                           |
| R01_cb16038_c2/flp0/516      | NA                         | R01_cb16038_c2/flp0/516     | R01_cb16038_c2/flp0/516     | R01_cb16038_c2/flp0/516      |
| R01_cb8564_c70590/flp0/3216  | NA                         | R01_cb8564_c70590/flp0/3216 | R01_cb8564_c70590/flp0/3216 | NA                           |
| R01_cb13478_c17/flp0/507     | NA                         | R01_cb13478_c17/flp0/507    | R01_cb13478_c17/flp0/507    | R01_cb13478_c17/flp0/507     |
| R01_cb8564_c69095/f2p1/4286  | NA                         | R01_cb8564_c69095/f2p1/4286 | R01_cb8564_c69095/f2p1/4286 | R01_cb8564_c69095/f2p1/4286  |
| R01_cb8564_c1635/flp0/2390   | R01_cb8564_c1635/flp0/2390 | R01_cb8564_c1635/flp0/2390  | R01_cb8564_c1635/flp0/2390  | NA                           |
| R01_cb11629_c1/flp0/3194     | NA                         | R01_cb11629_c1/flp0/3194    | NA                          | R01_cb11629_c1/flp0/3194     |
| R01_cb10148_c8/flp0/1389     | NA                         | NA                          | NA                          | R01_cb10148_c8/flp0/1389     |



|                             |                          |                             |                             |                             |
|-----------------------------|--------------------------|-----------------------------|-----------------------------|-----------------------------|
| R01_cb10902_c1/flp0/1552    | NA                       | NA                          | NA                          | R01_cb10902_c1/flp0/1552    |
| R01_cb12383_c14/flp0/927    | R01_cb12383_c14/flp0/927 | NA                          | NA                          | NA                          |
| R01_cb18451_c3/flp0/979     | NA                       | NA                          | NA                          | R01_cb18451_c3/flp0/979     |
| R01_cb5756_c1/flp0/3055     | R01_cb5756_c1/flp0/3055  | R01_cb5756_c1/flp0/3055     | R01_cb5756_c1/flp0/3055     | R01_cb5756_c1/flp0/3055     |
| R01_cb5621_c50/flp0/693     | NA                       | R01_cb5621_c50/flp0/693     | R01_cb5621_c50/flp0/693     | R01_cb5621_c50/flp0/693     |
| R01_cb7334_c7/flp0/2085     | NA                       | NA                          | NA                          | R01_cb7334_c7/flp0/2085     |
| R01_cb8564_c71376/flp0/3368 | NA                       | NA                          | NA                          | R01_cb8564_c71376/flp0/3368 |
| R01_cb2154_c11/flp0/2343    | NA                       | R01_cb2154_c11/flp0/2343    | NA                          | NA                          |
| R01_cb5415_c6/flp0/2542     | NA                       | R01_cb5415_c6/flp0/2542     | NA                          | R01_cb5415_c6/flp0/2542     |
| R01_cb6170_c20/flp0/2823    | NA                       | NA                          | NA                          | R01_cb6170_c20/flp0/2823    |
| R01_cb8564_c51456/flp0/2928 | NA                       | R01_cb8564_c51456/flp0/2928 | NA                          | NA                          |
| R01_cb16294_c0/f4p0/1001    | NA                       | NA                          | NA                          | R01_cb16294_c0/f4p0/1001    |
| R01_cb17550_c1/flp0/995     | NA                       | R01_cb17550_c1/flp0/995     | NA                          | R01_cb17550_c1/flp0/995     |
| R01_cb124_c46/flp0/3756     | NA                       | NA                          | NA                          | R01_cb124_c46/flp0/3756     |
| R01_cb18132_c26/flp0/1670   | NA                       | R01_cb18132_c26/flp0/1670   | NA                          | NA                          |
| R01_cb8569_c15/flp0/5086    | NA                       | R01_cb8569_c15/flp0/5086    | NA                          | NA                          |
| R01_cb7645_c1/flp0/2570     | R01_cb7645_c1/flp0/2570  | R01_cb7645_c1/flp0/2570     | NA                          | NA                          |
| R01_cb13249_c1/flp1/1112    | NA                       | NA                          | NA                          | R01_cb13249_c1/flp1/1112    |
| R01_cb5790_c3/flp0/4598     | NA                       | R01_cb5790_c3/flp0/4598     | NA                          | R01_cb5790_c3/flp0/4598     |
| R01_cb8564_c90018/flp0/2229 | NA                       | NA                          | R01_cb8564_c90018/flp0/2229 | R01_cb8564_c90018/flp0/2229 |
| R01_cb4824_c7/flp0/2973     | NA                       | R01_cb4824_c7/flp0/2973     | R01_cb4824_c7/flp0/2973     | R01_cb4824_c7/flp0/2973     |
| R01_cb8564_c1831/f2p0/4066  | NA                       | R01_cb8564_c1831/f2p0/4066  | R01_cb8564_c1831/f2p0/4066  | R01_cb8564_c1831/f2p0/4066  |
| R01_cb8564_c107647/f5p1/257 | NA                       | NA                          | R01_cb8564_c107647/f5p1/257 | R01_cb8564_c107647/f5p1/257 |
| 5                           |                          |                             | 5                           | 5                           |
| R01_cb5304_c23/flp0/2591    | NA                       | NA                          | NA                          | R01_cb5304_c23/flp0/2591    |
| R01_cb7810_c0/f2p0/2528     | R01_cb7810_c0/f2p0/2528  | R01_cb7810_c0/f2p0/2528     | R01_cb7810_c0/f2p0/2528     | NA                          |

|                              |                           |                              |                           |                              |
|------------------------------|---------------------------|------------------------------|---------------------------|------------------------------|
| R01_cb18386_c7/flp0/1299     | NA                        | R01_cb18386_c7/flp0/1299     | NA                        | NA                           |
| R01_cb2387_c11/flp0/3299     | NA                        | R01_cb2387_c11/flp0/3299     | NA                        | NA                           |
| R01_cb2970_c1/fl8p0/524      | NA                        | NA                           | NA                        | R01_cb2970_c1/fl8p0/524      |
| R01_cb13144_c4/flp0/544      | R01_cb13144_c4/flp0/544   | R01_cb13144_c4/flp0/544      | NA                        | R01_cb13144_c4/flp0/544      |
| R01_cb11119_c1/flp0/2722     | NA                        | NA                           | NA                        | R01_cb11119_c1/flp0/2722     |
| R01_cb12623_c3/flp0/1490     | NA                        | R01_cb12623_c3/flp0/1490     | NA                        | R01_cb12623_c3/flp0/1490     |
| R01_cb3301_c8/flp0/2455      | NA                        | R01_cb3301_c8/flp0/2455      | NA                        | R01_cb3301_c8/flp0/2455      |
| R01_cb15214_c1/flp0/1712     | NA                        | NA                           | NA                        | R01_cb15214_c1/flp0/1712     |
| R01_cb6631_c21/flp0/2503     | NA                        | NA                           | NA                        | R01_cb6631_c21/flp0/2503     |
| R01_cb18409_c177/flp0/369    | R01_cb18409_c177/flp0/369 | R01_cb18409_c177/flp0/369    | R01_cb18409_c177/flp0/369 | R01_cb18409_c177/flp0/369    |
| R01_cb16541_c0/flp0/1140     | NA                        | NA                           | NA                        | R01_cb16541_c0/flp0/1140     |
| R01_cb18301_c51/flp0/1190    | NA                        | R01_cb18301_c51/flp0/1190    | NA                        | R01_cb18301_c51/flp0/1190    |
| R01_cb4676_c2/flp0/2211      | NA                        | NA                           | NA                        | R01_cb4676_c2/flp0/2211      |
| R01_cb12992_c9/flp0/977      | NA                        | R01_cb12992_c9/flp0/977      | NA                        | NA                           |
| R01_cb15967_c1/flp0/557      | R01_cb15967_c1/flp0/557   | R01_cb15967_c1/flp0/557      | NA                        | NA                           |
| R01_cb8564_c88698/flp0/3459  | NA                        | NA                           | NA                        | R01_cb8564_c88698/flp0/3459  |
| R01_cb8564_c21454/flp0/2405  | NA                        | R01_cb8564_c21454/flp0/2405  | NA                        | NA                           |
| R01_cb8596_c3/flp0/1801      | NA                        | NA                           | NA                        | R01_cb8596_c3/flp0/1801      |
| R01_cb10014_c15/flp0/1536    | R01_cb10014_c15/flp0/1536 | R01_cb10014_c15/flp0/1536    | NA                        | NA                           |
| R01_cb10556_c2/flp0/2132     | NA                        | R01_cb10556_c2/flp0/2132     | NA                        | NA                           |
| R01_cb1609_c3/flp0/2358      | NA                        | R01_cb1609_c3/flp0/2358      | NA                        | NA                           |
| R01_cb8564_c126647/f2p1/2497 | NA                        | R01_cb8564_c126647/f2p1/2497 | NA                        | NA                           |
| R01_cb8564_c112825/flp0/2597 | NA                        | NA                           | NA                        | R01_cb8564_c112825/flp0/2597 |
| R01_cb7946_c5/flp0/903       | R01_cb7946_c5/flp0/903    | R01_cb7946_c5/flp0/903       | R01_cb7946_c5/flp0/903    | R01_cb7946_c5/flp0/903       |

|                              |                             |                              |                              |                             |
|------------------------------|-----------------------------|------------------------------|------------------------------|-----------------------------|
| R01_cb6281_c1/flp0/2403      | NA                          | NA                           | NA                           | R01_cb6281_c1/flp0/2403     |
| R01_cb8564_c79804/flp0/1916  | NA                          | R01_cb8564_c79804/flp0/1916  | NA                           | NA                          |
| R01_cb14125_c92/flp0/376     | R01_cb14125_c92/flp0/376    | R01_cb14125_c92/flp0/376     | R01_cb14125_c92/flp0/376     | NA                          |
| R01_cb5900_c41/flp0/2729     | NA                          | R01_cb5900_c41/flp0/2729     | NA                           | R01_cb5900_c41/flp0/2729    |
| R01_cb8564_c77120/flp0/2159  | R01_cb8564_c77120/flp0/2159 | R01_cb8564_c77120/flp0/2159  | NA                           | R01_cb8564_c77120/flp0/2159 |
| R01_cb7899_c6/flp0/1274      | NA                          | NA                           | NA                           | R01_cb7899_c6/flp0/1274     |
| R01_cb8564_c78626/flp0/2262  | NA                          | R01_cb8564_c78626/flp0/2262  | NA                           | NA                          |
| R01_cb8564_c91190/flp0/4963  | NA                          | NA                           | NA                           | R01_cb8564_c91190/flp0/4963 |
| R01_cb14316_c3/flp0/1725     | R01_cb14316_c3/flp0/1725    | R01_cb14316_c3/flp0/1725     | R01_cb14316_c3/flp0/1725     | R01_cb14316_c3/flp0/1725    |
| R01_cb18649_c7/flp0/5612     | NA                          | NA                           | NA                           | R01_cb18649_c7/flp0/5612    |
| R01_cb8564_c36134/flp0/3837  | NA                          | R01_cb8564_c36134/flp0/3837  | NA                           | NA                          |
| R01_cb16677_c2/flp0/1783     | NA                          | R01_cb16677_c2/flp0/1783     | R01_cb16677_c2/flp0/1783     | NA                          |
| R01_cb7927_c2/flp0/2011      | NA                          | NA                           | R01_cb7927_c2/flp0/2011      | R01_cb7927_c2/flp0/2011     |
| R01_cb8564_c129049/flp0/2875 | NA                          | R01_cb8564_c129049/flp0/2875 | NA                           | NA                          |
| R01_cb3774_c78/flp0/1141     | NA                          | NA                           | NA                           | R01_cb3774_c78/flp0/1141    |
| R01_cb16979_c6/flp0/1287     | R01_cb16979_c6/flp0/1287    | R01_cb16979_c6/flp0/1287     | R01_cb16979_c6/flp0/1287     | NA                          |
| R01_cb8564_c42719/flp0/2476  | R01_cb8564_c42719/flp0/2476 | R01_cb8564_c42719/flp0/2476  | R01_cb8564_c42719/flp0/2476  | R01_cb8564_c42719/flp0/2476 |
| R01_cb13304_c0/flp0/941      | NA                          | R01_cb13304_c0/flp0/941      | NA                           | R01_cb13304_c0/flp0/941     |
| R01_cb18456_c7558/flp0/1732  | NA                          | R01_cb18456_c7558/flp0/1732  | NA                           | NA                          |
| R01_cb6785_c16/flp0/2272     | NA                          | R01_cb6785_c16/flp0/2272     | NA                           | NA                          |
| R01_cb8564_c129909/flp1/2314 | NA                          | R01_cb8564_c129909/flp1/2314 | R01_cb8564_c129909/flp1/2314 | NA                          |
| R01_cb3374_c1/flp0/4903      | NA                          | R01_cb3374_c1/flp0/4903      | R01_cb3374_c1/flp0/4903      | NA                          |

|                             |                          |                             |                             |                             |
|-----------------------------|--------------------------|-----------------------------|-----------------------------|-----------------------------|
| R01_cb8827_c5/f1p0/2191     | NA                       | R01_cb8827_c5/f1p0/2191     | NA                          | NA                          |
| R01_cb11271_c2/f1p0/2520    | NA                       | R01_cb11271_c2/f1p0/2520    | NA                          | NA                          |
| R01_cb6802_c63/f1p0/2997    | R01_cb6802_c63/f1p0/2997 | R01_cb6802_c63/f1p0/2997    | R01_cb6802_c63/f1p0/2997    | R01_cb6802_c63/f1p0/2997    |
| R01_cb13025_c1/f3p0/1232    | NA                       | NA                          | NA                          | R01_cb13025_c1/f3p0/1232    |
| R01_cb16132_c35/f1p0/630    | R01_cb16132_c35/f1p0/630 | R01_cb16132_c35/f1p0/630    | R01_cb16132_c35/f1p0/630    | R01_cb16132_c35/f1p0/630    |
| R01_cb10993_c1/f1p0/2295    | NA                       | NA                          | NA                          | R01_cb10993_c1/f1p0/2295    |
| R01_cb6794_c35/f1p0/2673    | NA                       | R01_cb6794_c35/f1p0/2673    | NA                          | NA                          |
| R01_cb2588_c3/f1p0/618      | NA                       | R01_cb2588_c3/f1p0/618      | R01_cb2588_c3/f1p0/618      | R01_cb2588_c3/f1p0/618      |
| R01_cb454_c34/f1p0/2241     | NA                       | R01_cb454_c34/f1p0/2241     | NA                          | R01_cb454_c34/f1p0/2241     |
| R01_cb16557_c0/f2p0/800     | NA                       | R01_cb16557_c0/f2p0/800     | NA                          | R01_cb16557_c0/f2p0/800     |
| R01_cb10363_c1/f1p0/3898    | NA                       | R01_cb10363_c1/f1p0/3898    | R01_cb10363_c1/f1p0/3898    | NA                          |
| R01_cb4383_c2/f1p0/2404     | NA                       | NA                          | R01_cb4383_c2/f1p0/2404     | NA                          |
| R01_cb2177_c76/f1p0/4006    | NA                       | NA                          | NA                          | R01_cb2177_c76/f1p0/4006    |
| R01_cb13938_c5/f4p0/1530    | NA                       | NA                          | NA                          | R01_cb13938_c5/f4p0/1530    |
| R01_cb3968_c13/f1p0/3540    | NA                       | R01_cb3968_c13/f1p0/3540    | NA                          | NA                          |
| R01_cb8564_c85200/f1p0/2237 | NA                       | R01_cb8564_c85200/f1p0/2237 | R01_cb8564_c85200/f1p0/2237 | R01_cb8564_c85200/f1p0/2237 |
| R01_cb8564_c4867/f1p0/3090  | NA                       | R01_cb8564_c4867/f1p0/3090  | NA                          | NA                          |
| R01_cb8564_c11630/f1p0/3365 | NA                       | R01_cb8564_c11630/f1p0/3365 | R01_cb8564_c11630/f1p0/3365 | R01_cb8564_c11630/f1p0/3365 |
| R01_cb8564_c24669/f1p0/3626 | NA                       | R01_cb8564_c24669/f1p0/3626 | R01_cb8564_c24669/f1p0/3626 | R01_cb8564_c24669/f1p0/3626 |
| R01_cb7327_c4/f1p0/1677     | NA                       | R01_cb7327_c4/f1p0/1677     | NA                          | NA                          |
| R01_cb2378_c26/f1p0/3396    | NA                       | NA                          | NA                          | R01_cb2378_c26/f1p0/3396    |
| R01_cb261_c13/f1p0/3047     | NA                       | NA                          | NA                          | R01_cb261_c13/f1p0/3047     |
| R01_cb15867_c9/f1p0/1296    | NA                       | R01_cb15867_c9/f1p0/1296    | NA                          | NA                          |
| R01_cb1380_c32/f1p0/4415    | NA                       | R01_cb1380_c32/f1p0/4415    | NA                          | NA                          |
| R01_cb5900_c52/f1p0/3276    | NA                       | R01_cb5900_c52/f1p0/3276    | R01_cb5900_c52/f1p0/3276    | R01_cb5900_c52/f1p0/3276    |
| R01_cb8564_c1332/f1p0/2677  | NA                       | NA                          | NA                          | R01_cb8564_c1332/f1p0/2677  |

|                              |                         |                              |                          |                          |
|------------------------------|-------------------------|------------------------------|--------------------------|--------------------------|
| R01_cb18456_c1987/f1p0/1000  | NA                      | R01_cb18456_c1987/f1p0/1000  | NA                       | NA                       |
| R01_cb15396_c1/f1p0/949      | NA                      | NA                           | NA                       | R01_cb15396_c1/f1p0/949  |
| R01_cb3854_c2/f1p0/2571      | NA                      | NA                           | R01_cb3854_c2/f1p0/2571  | NA                       |
| R01_cb18016_c1/f1p0/416      | R01_cb18016_c1/f1p0/416 | R01_cb18016_c1/f1p0/416      | R01_cb18016_c1/f1p0/416  | R01_cb18016_c1/f1p0/416  |
| R01_cb18287_c6/f1p0/783      | R01_cb18287_c6/f1p0/783 | R01_cb18287_c6/f1p0/783      | R01_cb18287_c6/f1p0/783  | R01_cb18287_c6/f1p0/783  |
| R01_cb6948_c11/f1p0/2702     | NA                      | NA                           | NA                       | R01_cb6948_c11/f1p0/2702 |
| R01_cb4768_c20/f1p0/2201     | NA                      | R01_cb4768_c20/f1p0/2201     | NA                       | NA                       |
| R01_cb9352_c9/f1p0/1685      | NA                      | NA                           | NA                       | R01_cb9352_c9/f1p0/1685  |
| R01_cb16311_c0/f6p0/1230     | NA                      | NA                           | NA                       | R01_cb16311_c0/f6p0/1230 |
| R01_cb8279_c6/f1p1/2612      | NA                      | NA                           | NA                       | R01_cb8279_c6/f1p1/2612  |
| R01_cb1021_c6/f1p0/1849      | NA                      | R01_cb1021_c6/f1p0/1849      | NA                       | NA                       |
| R01_cb2540_c2/f1p0/3407      | NA                      | R01_cb2540_c2/f1p0/3407      | NA                       | NA                       |
| R01_cb8947_c0/f1p0/2228      | NA                      | NA                           | NA                       | R01_cb8947_c0/f1p0/2228  |
| R01_cb5190_c2/f3p1/2405      | NA                      | NA                           | NA                       | R01_cb5190_c2/f3p1/2405  |
| R01_cb6206_c10/f1p0/609      | NA                      | R01_cb6206_c10/f1p0/609      | NA                       | R01_cb6206_c10/f1p0/609  |
| R01_cb8564_c129502/f1p0/2808 | NA                      | R01_cb8564_c129502/f1p0/2808 | NA                       | NA                       |
| R01_cb3149_c67/f1p0/2831     | NA                      | R01_cb3149_c67/f1p0/2831     | NA                       | NA                       |
| R01_cb1567_c2/f1p0/4024      | NA                      | NA                           | NA                       | R01_cb1567_c2/f1p0/4024  |
| R01_cb1758_c3/f1p0/3123      | NA                      | NA                           | NA                       | R01_cb1758_c3/f1p0/3123  |
| R01_cb1666_c9/f1p0/2297      | NA                      | NA                           | NA                       | R01_cb1666_c9/f1p0/2297  |
| R01_cb15102_c0/f3p0/776      | NA                      | NA                           | NA                       | R01_cb15102_c0/f3p0/776  |
| R01_cb506_c14/f1p0/4569      | NA                      | NA                           | NA                       | R01_cb506_c14/f1p0/4569  |
| R01_cb15326_c2/f1p0/1436     | NA                      | R01_cb15326_c2/f1p0/1436     | R01_cb15326_c2/f1p0/1436 | R01_cb15326_c2/f1p0/1436 |
| R01_cb11278_c1/f3p2/1790     | NA                      | NA                           | NA                       | R01_cb11278_c1/f3p2/1790 |
| R01_cb9587_c0/f1p0/2041      | R01_cb9587_c0/f1p0/2041 | R01_cb9587_c0/f1p0/2041      | R01_cb9587_c0/f1p0/2041  | R01_cb9587_c0/f1p0/2041  |

|                              |                          |                              |                              |                              |
|------------------------------|--------------------------|------------------------------|------------------------------|------------------------------|
| R01_cb9079_c12/flp0/823      | NA                       | NA                           | NA                           | R01_cb9079_c12/flp0/823      |
| R01_cb2788_c18/flp0/1890     | NA                       | NA                           | R01_cb2788_c18/flp0/1890     | R01_cb2788_c18/flp0/1890     |
| R01_cb1554_c8/flp0/5253      | NA                       | R01_cb1554_c8/flp0/5253      | R01_cb1554_c8/flp0/5253      | R01_cb1554_c8/flp0/5253      |
| R01_cb7151_c1/flp0/2697      | R01_cb7151_c1/flp0/2697  | R01_cb7151_c1/flp0/2697      | NA                           | NA                           |
| R01_cb13654_c1/flp0/1030     | NA                       | NA                           | NA                           | R01_cb13654_c1/flp0/1030     |
| R01_cb8564_c119063/flp0/2299 | NA                       | R01_cb8564_c119063/flp0/2299 | R01_cb8564_c119063/flp0/2299 | R01_cb8564_c119063/flp0/2299 |
| R01_cb10024_c516/flp1/746    | NA                       | NA                           | R01_cb10024_c516/flp1/746    | NA                           |
| R01_cb13667_c0/f6p0/847      | R01_cb13667_c0/f6p0/847  | R01_cb13667_c0/f6p0/847      | R01_cb13667_c0/f6p0/847      | R01_cb13667_c0/f6p0/847      |
| R01_cb8564_c69825/flp0/2606  | NA                       | R01_cb8564_c69825/flp0/2606  | NA                           | R01_cb8564_c69825/flp0/2606  |
| R01_cb15682_c2/flp0/813      | NA                       | NA                           | R01_cb15682_c2/flp0/813      | R01_cb15682_c2/flp0/813      |
| R01_cb6365_c14/flp0/2471     | NA                       | R01_cb6365_c14/flp0/2471     | NA                           | NA                           |
| R01_cb11682_c2/flp0/1288     | NA                       | NA                           | NA                           | R01_cb11682_c2/flp0/1288     |
| R01_cb15760_c3/flp0/611      | NA                       | R01_cb15760_c3/flp0/611      | R01_cb15760_c3/flp0/611      | R01_cb15760_c3/flp0/611      |
| R01_cb16188_c14/flp0/348     | R01_cb16188_c14/flp0/348 | R01_cb16188_c14/flp0/348     | R01_cb16188_c14/flp0/348     | R01_cb16188_c14/flp0/348     |
| R01_cb16383_c8/flp0/1866     | NA                       | NA                           | NA                           | R01_cb16383_c8/flp0/1866     |
| R01_cb2073_c0/flp0/3846      | NA                       | R01_cb2073_c0/flp0/3846      | R01_cb2073_c0/flp0/3846      | R01_cb2073_c0/flp0/3846      |
| R01_cb8564_c36233/flp0/3072  | NA                       | NA                           | R01_cb8564_c36233/flp0/3072  | NA                           |
| R01_cb14197_c3/flp0/1737     | NA                       | NA                           | NA                           | R01_cb14197_c3/flp0/1737     |
| R01_cb4345_c6/flp1/3369      | NA                       | NA                           | NA                           | R01_cb4345_c6/flp1/3369      |
| R01_cb7214_c8/flp0/2224      | NA                       | NA                           | NA                           | R01_cb7214_c8/flp0/2224      |
| R01_cb5567_c0/flp0/3070      | NA                       | NA                           | R01_cb5567_c0/flp0/3070      | R01_cb5567_c0/flp0/3070      |
| R01_cb15096_c2/flp0/662      | R01_cb15096_c2/flp0/662  | R01_cb15096_c2/flp0/662      | R01_cb15096_c2/flp0/662      | R01_cb15096_c2/flp0/662      |
| R01_cb5122_c18/flp0/2982     | NA                       | NA                           | NA                           | R01_cb5122_c18/flp0/2982     |
| R01_cb14545_c3/flp1/1803     | NA                       | NA                           | NA                           | R01_cb14545_c3/flp1/1803     |
| R01_cb9587_c1/flp0/2265      | R01_cb9587_c1/flp0/2265  | R01_cb9587_c1/flp0/2265      | R01_cb9587_c1/flp0/2265      | R01_cb9587_c1/flp0/2265      |

|                              |                             |                              |                              |                              |
|------------------------------|-----------------------------|------------------------------|------------------------------|------------------------------|
| R01_cb18456_c5435/flp2/623   | R01_cb18456_c5435/flp2/623  | R01_cb18456_c5435/flp2/623   | R01_cb18456_c5435/flp2/623   | R01_cb18456_c5435/flp2/623   |
| R01_cb8564_c81388/flp0/3266  | R01_cb8564_c81388/flp0/3266 | R01_cb8564_c81388/flp0/3266  | NA                           | NA                           |
| R01_cb18409_c183/flp0/318    | R01_cb18409_c183/flp0/318   | R01_cb18409_c183/flp0/318    | R01_cb18409_c183/flp0/318    | R01_cb18409_c183/flp0/318    |
| R01_cb14675_c0/f25p2/843     | R01_cb14675_c0/f25p2/843    | R01_cb14675_c0/f25p2/843     | R01_cb14675_c0/f25p2/843     | R01_cb14675_c0/f25p2/843     |
| R01_cb3025_c1/flp0/3471      | NA                          | NA                           | NA                           | R01_cb3025_c1/flp0/3471      |
| R01_cb8564_c129450/flp0/3060 | NA                          | R01_cb8564_c129450/flp0/3060 | R01_cb8564_c129450/flp0/3060 | R01_cb8564_c129450/flp0/3060 |
| R01_cb16746_c2/flp0/1369     | NA                          | NA                           | NA                           | R01_cb16746_c2/flp0/1369     |
| R01_cb8564_c125660/flp1/2006 | NA                          | NA                           | NA                           | R01_cb8564_c125660/flp1/2006 |
| R01_cb16422_c4/flp0/1648     | NA                          | R01_cb16422_c4/flp0/1648     | R01_cb16422_c4/flp0/1648     | R01_cb16422_c4/flp0/1648     |
| R01_cb8564_c110953/flp0/2771 | NA                          | R01_cb8564_c110953/flp0/2771 | NA                           | NA                           |
| R01_cb4180_c9/flp0/6243      | NA                          | NA                           | NA                           | R01_cb4180_c9/flp0/6243      |
| R01_cb12397_c2/flp0/970      | R01_cb12397_c2/flp0/970     | R01_cb12397_c2/flp0/970      | R01_cb12397_c2/flp0/970      | R01_cb12397_c2/flp0/970      |
| R01_cb10889_c0/flp0/1533     | NA                          | R01_cb10889_c0/flp0/1533     | NA                           | NA                           |
| R01_cb5415_c4/flp0/3103      | NA                          | NA                           | NA                           | R01_cb5415_c4/flp0/3103      |
| R01_cb606_c27/flp3/4332      | NA                          | NA                           | NA                           | R01_cb606_c27/flp3/4332      |
| R01_cb15883_c2/flp0/672      | NA                          | R01_cb15883_c2/flp0/672      | NA                           | NA                           |
| R01_cb7221_c6/flp0/2447      | NA                          | NA                           | NA                           | R01_cb7221_c6/flp0/2447      |
| R01_cb9763_c9/flp0/1987      | NA                          | R01_cb9763_c9/flp0/1987      | NA                           | NA                           |
| R01_cb11401_c2/flp0/2430     | NA                          | R01_cb11401_c2/flp0/2430     | R01_cb11401_c2/flp0/2430     | R01_cb11401_c2/flp0/2430     |
| R01_cb10398_c4/flp0/654      | R01_cb10398_c4/flp0/654     | R01_cb10398_c4/flp0/654      | NA                           | R01_cb10398_c4/flp0/654      |
| R01_cb2571_c7/f3p1/3711      | NA                          | NA                           | NA                           | R01_cb2571_c7/f3p1/3711      |
| R01_cb10129_c5/flp0/550      | NA                          | R01_cb10129_c5/flp0/550      | NA                           | NA                           |

|                             |                             |                             |                             |                             |
|-----------------------------|-----------------------------|-----------------------------|-----------------------------|-----------------------------|
| R01_cb17363_c9/flp0/400     | R01_cb17363_c9/flp0/400     | R01_cb17363_c9/flp0/400     | R01_cb17363_c9/flp0/400     | R01_cb17363_c9/flp0/400     |
| R01_cb4777_c3/flp0/717      | NA                          | R01_cb4777_c3/flp0/717      | NA                          | R01_cb4777_c3/flp0/717      |
| R01_cb5120_c0/flp0/3176     | NA                          | NA                          | NA                          | R01_cb5120_c0/flp0/3176     |
| R01_cb18456_c2298/flp0/329  | R01_cb18456_c2298/flp0/329  | R01_cb18456_c2298/flp0/329  | NA                          | NA                          |
| R01_cb8564_c69287/f2p0/1920 | NA                          | R01_cb8564_c69287/f2p0/1920 | R01_cb8564_c69287/f2p0/1920 | R01_cb8564_c69287/f2p0/1920 |
| R01_cb8564_c1884/flp0/1965  | NA                          | NA                          | NA                          | R01_cb8564_c1884/flp0/1965  |
| R01_cb5378_c5/flp0/6519     | NA                          | R01_cb5378_c5/flp0/6519     | R01_cb5378_c5/flp0/6519     | NA                          |
| R01_cb16425_c1/flp0/708     | NA                          | R01_cb16425_c1/flp0/708     | R01_cb16425_c1/flp0/708     | R01_cb16425_c1/flp0/708     |
| R01_cb18456_c1717/f2p0/1339 | NA                          | R01_cb18456_c1717/f2p0/1339 | R01_cb18456_c1717/f2p0/1339 | R01_cb18456_c1717/f2p0/1339 |
| R01_cb8564_c2857/flp0/2224  | R01_cb8564_c2857/flp0/2224  | R01_cb8564_c2857/flp0/2224  | R01_cb8564_c2857/flp0/2224  | R01_cb8564_c2857/flp0/2224  |
| R01_cb8564_c41520/flp0/2300 | R01_cb8564_c41520/flp0/2300 | R01_cb8564_c41520/flp0/2300 | R01_cb8564_c41520/flp0/2300 | R01_cb8564_c41520/flp0/2300 |
| R01_cb17036_c1/flp0/936     | NA                          | R01_cb17036_c1/flp0/936     | NA                          | NA                          |
| R01_cb18016_c0/flp0/445     | R01_cb18016_c0/flp0/445     | R01_cb18016_c0/flp0/445     | R01_cb18016_c0/flp0/445     | R01_cb18016_c0/flp0/445     |
| R01_cb8084_c5/flp0/1379     | NA                          | NA                          | NA                          | R01_cb8084_c5/flp0/1379     |
| R01_cb8564_c1920/flp0/2430  | NA                          | R01_cb8564_c1920/flp0/2430  | NA                          | R01_cb8564_c1920/flp0/2430  |
| R01_cb12273_c11/f2p0/1517   | NA                          | NA                          | NA                          | R01_cb12273_c11/f2p0/1517   |
| R01_cb2701_c4/flp0/3079     | NA                          | R01_cb2701_c4/flp0/3079     | NA                          | R01_cb2701_c4/flp0/3079     |
| R01_cb17809_c0/f3p0/1677    | NA                          | NA                          | NA                          | R01_cb17809_c0/f3p0/1677    |
| R01_cb3832_c3/flp0/3385     | NA                          | R01_cb3832_c3/flp0/3385     | NA                          | NA                          |
| R01_cb8564_c51515/flp1/2999 | NA                          | R01_cb8564_c51515/flp1/2999 | NA                          | NA                          |
| R01_cb7027_c5/flp0/1053     | R01_cb7027_c5/flp0/1053     | R01_cb7027_c5/flp0/1053     | R01_cb7027_c5/flp0/1053     | R01_cb7027_c5/flp0/1053     |
| R01_cb5896_c161/flp0/3233   | NA                          | NA                          | R01_cb5896_c161/flp0/3233   | R01_cb5896_c161/flp0/3233   |
| R01_cb647_c7/flp0/2791      | NA                          | R01_cb647_c7/flp0/2791      | NA                          | R01_cb647_c7/flp0/2791      |
| R01_cb11895_c0/f3p0/1393    | NA                          | NA                          | NA                          | R01_cb11895_c0/f3p0/1393    |
| R01_cb8609_c13/flp0/3821    | NA                          | R01_cb8609_c13/flp0/3821    | NA                          | NA                          |



|                             |                             |                             |                             |                             |
|-----------------------------|-----------------------------|-----------------------------|-----------------------------|-----------------------------|
| R01_cb1905_c19/flp0/2075    | NA                          | NA                          | R01_cb1905_c19/flp0/2075    | NA                          |
| R01_cb8564_c24832/flp0/4329 | NA                          | NA                          | NA                          | R01_cb8564_c24832/flp0/4329 |
| R01_cb16125_c15/flp0/1737   | NA                          | R01_cb16125_c15/flp0/1737   | NA                          | NA                          |
| R01_cb14429_c2/flp0/617     | R01_cb14429_c2/flp0/617     | R01_cb14429_c2/flp0/617     | R01_cb14429_c2/flp0/617     | R01_cb14429_c2/flp0/617     |
| R01_cb8564_c75455/flp0/3605 | NA                          | R01_cb8564_c75455/flp0/3605 | NA                          | R01_cb8564_c75455/flp0/3605 |
| R01_cb7533_c13/flp0/2022    | NA                          | NA                          | NA                          | R01_cb7533_c13/flp0/2022    |
| R01_cb15682_c0/f5p0/917     | NA                          | NA                          | NA                          | R01_cb15682_c0/f5p0/917     |
| R01_cb1813_c39/flp0/5087    | NA                          | NA                          | NA                          | R01_cb1813_c39/flp0/5087    |
| R01_cb48_c3/flp2/4932       | NA                          | NA                          | NA                          | R01_cb48_c3/flp2/4932       |
| R01_cb7113_c0/flp0/2694     | NA                          | NA                          | NA                          | R01_cb7113_c0/flp0/2694     |
| R01_cb14805_c2/f3p0/575     | NA                          | R01_cb14805_c2/f3p0/575     | NA                          | NA                          |
| R01_cb8564_c127092/flp0/257 | NA                          | R01_cb8564_c127092/flp0/257 | R01_cb8564_c127092/flp0/257 | R01_cb8564_c127092/flp0/257 |
| 6                           | 6                           | 6                           | 6                           | 6                           |
| R01_cb8564_c124009/flp0/340 | NA                          | R01_cb8564_c124009/flp0/340 | NA                          | R01_cb8564_c124009/flp0/340 |
| 2                           | 2                           | 2                           | 2                           | 2                           |
| R01_cb13127_c4/flp0/769     | NA                          | R01_cb13127_c4/flp0/769     | NA                          | NA                          |
| R01_cb15255_c0/f3p0/724     | NA                          | NA                          | NA                          | R01_cb15255_c0/f3p0/724     |
| R01_cb8379_c15/flp0/1325    | NA                          | R01_cb8379_c15/flp0/1325    | NA                          | NA                          |
| R01_cb8954_c13/flp0/2289    | NA                          | R01_cb8954_c13/flp0/2289    | NA                          | R01_cb8954_c13/flp0/2289    |
| R01_cb8564_c33591/f5p1/2462 | R01_cb8564_c33591/f5p1/2462 | R01_cb8564_c33591/f5p1/2462 | R01_cb8564_c33591/f5p1/2462 | R01_cb8564_c33591/f5p1/2462 |
| 2                           | 2                           | 2                           | 2                           | 2                           |
| R01_cb2845_c10/flp1/3408    | NA                          | NA                          | NA                          | R01_cb2845_c10/flp1/3408    |
| R01_cb10217_c1/flp0/1958    | NA                          | NA                          | NA                          | R01_cb10217_c1/flp0/1958    |
| R01_cb119_c14/flp2/4826     | NA                          | NA                          | NA                          | R01_cb119_c14/flp2/4826     |
| R01_cb9592_c6/flp1/1652     | NA                          | NA                          | NA                          | R01_cb9592_c6/flp1/1652     |
| R01_cb18409_c127/flp0/781   | R01_cb18409_c127/flp0/781   | R01_cb18409_c127/flp0/781   | R01_cb18409_c127/flp0/781   | R01_cb18409_c127/flp0/781   |

|                             |                             |                             |                             |                             |
|-----------------------------|-----------------------------|-----------------------------|-----------------------------|-----------------------------|
| R01_cb17562_c2/f5p0/526     | NA                          | R01_cb17562_c2/f5p0/526     | NA                          | NA                          |
| R01_cb8564_c70445/f1p0/3004 | R01_cb8564_c70445/f1p0/3004 | R01_cb8564_c70445/f1p0/3004 | NA                          | NA                          |
| R01_cb1346_c9/f1p0/1789     | NA                          | R01_cb1346_c9/f1p0/1789     | NA                          | NA                          |
| R01_cb8564_c76406/f1p1/3251 | NA                          | R01_cb8564_c76406/f1p1/3251 | NA                          | NA                          |
| R01_cb10539_c0/f13p0/1103   | NA                          | NA                          | NA                          | R01_cb10539_c0/f13p0/1103   |
| R01_cb17374_c2/f1p1/790     | NA                          | NA                          | NA                          | R01_cb17374_c2/f1p1/790     |
| R01_cb1077_c11/f1p0/2476    | NA                          | R01_cb1077_c11/f1p0/2476    | NA                          | R01_cb1077_c11/f1p0/2476    |
| R01_cb3088_c3/f1p0/3699     | NA                          | R01_cb3088_c3/f1p0/3699     | R01_cb3088_c3/f1p0/3699     | R01_cb3088_c3/f1p0/3699     |
| R01_cb10787_c1/f1p0/1515    | NA                          | NA                          | NA                          | R01_cb10787_c1/f1p0/1515    |
| R01_cb737_c31/f1p0/1563     | NA                          | NA                          | NA                          | R01_cb737_c31/f1p0/1563     |
| R01_cb9906_c0/f1p0/1921     | NA                          | R01_cb9906_c0/f1p0/1921     | R01_cb9906_c0/f1p0/1921     | R01_cb9906_c0/f1p0/1921     |
| R01_cb8564_c85255/f1p1/2783 | NA                          | NA                          | NA                          | R01_cb8564_c85255/f1p1/2783 |
| R01_cb7492_c6/f1p1/2833     | NA                          | NA                          | NA                          | R01_cb7492_c6/f1p1/2833     |
| R01_cb10948_c6/f1p0/1409    | NA                          | NA                          | NA                          | R01_cb10948_c6/f1p0/1409    |
| R01_cb15034_c4/f1p0/1585    | NA                          | NA                          | NA                          | R01_cb15034_c4/f1p0/1585    |
| R01_cb8564_c1992/f3p0/2129  | R01_cb8564_c1992/f3p0/2129  | R01_cb8564_c1992/f3p0/2129  | R01_cb8564_c1992/f3p0/2129  | R01_cb8564_c1992/f3p0/2129  |
| R01_cb8564_c74830/f1p0/2373 | NA                          | NA                          | R01_cb8564_c74830/f1p0/2373 | NA                          |
| R01_cb124_c6/f3p0/2872      | NA                          | NA                          | NA                          | R01_cb124_c6/f3p0/2872      |
| R01_cb13033_c2/f2p0/1032    | NA                          | R01_cb13033_c2/f2p0/1032    | NA                          | R01_cb13033_c2/f2p0/1032    |
| R01_cb8564_c23888/f1p0/2702 | R01_cb8564_c23888/f1p0/2702 | R01_cb8564_c23888/f1p0/2702 | R01_cb8564_c23888/f1p0/2702 | R01_cb8564_c23888/f1p0/2702 |
| R01_cb11488_c0/f1p0/726     | NA                          | R01_cb11488_c0/f1p0/726     | R01_cb11488_c0/f1p0/726     | R01_cb11488_c0/f1p0/726     |
| R01_cb18456_c7179/f1p0/640  | NA                          | R01_cb18456_c7179/f1p0/640  | R01_cb18456_c7179/f1p0/640  | R01_cb18456_c7179/f1p0/640  |
| R01_cb7048_c1/f1p0/2706     | NA                          | R01_cb7048_c1/f1p0/2706     | NA                          | NA                          |
| R01_cb16451_c1/f2p0/1240    | NA                          | NA                          | NA                          | R01_cb16451_c1/f2p0/1240    |

|                             |                             |                             |                             |                             |
|-----------------------------|-----------------------------|-----------------------------|-----------------------------|-----------------------------|
| R01_cb18456_c5360/flp4/791  | NA                          | R01_cb18456_c5360/flp4/791  | NA                          | NA                          |
| R01_cb11081_c5/flp0/1144    | NA                          | R01_cb11081_c5/flp0/1144    | R01_cb11081_c5/flp0/1144    | NA                          |
| R01_cb12421_c33/flp0/658    | NA                          | R01_cb12421_c33/flp0/658    | R01_cb12421_c33/flp0/658    | R01_cb12421_c33/flp0/658    |
| R01_cb12525_c0/flp0/1227    | NA                          | R01_cb12525_c0/flp0/1227    | NA                          | NA                          |
| R01_cb17756_c30/flp0/384    | R01_cb17756_c30/flp0/384    | R01_cb17756_c30/flp0/384    | R01_cb17756_c30/flp0/384    | R01_cb17756_c30/flp0/384    |
| R01_cb8564_c20158/flp0/3961 | NA                          | NA                          | NA                          | R01_cb8564_c20158/flp0/3961 |
| R01_cb1215_c8/flp0/3148     | NA                          | R01_cb1215_c8/flp0/3148     | NA                          | R01_cb1215_c8/flp0/3148     |
| R01_cb8335_c10/flp0/2301    | NA                          | NA                          | NA                          | R01_cb8335_c10/flp0/2301    |
| R01_cb14843_c1/f2p0/790     | NA                          | NA                          | NA                          | R01_cb14843_c1/f2p0/790     |
| R01_cb8564_c90145/flp0/2345 | NA                          | R01_cb8564_c90145/flp0/2345 | NA                          | NA                          |
| R01_cb1508_c1/f3p3/1904     | NA                          | NA                          | NA                          | R01_cb1508_c1/f3p3/1904     |
| R01_cb3941_c29/flp0/3410    | NA                          | NA                          | NA                          | R01_cb3941_c29/flp0/3410    |
| R01_cb8564_c85433/flp0/3121 | NA                          | NA                          | R01_cb8564_c85433/flp0/3121 | NA                          |
| R01_cb4793_c7/flp1/3859     | NA                          | NA                          | NA                          | R01_cb4793_c7/flp1/3859     |
| R01_cb8564_c24476/flp0/2808 | R01_cb8564_c24476/flp0/2808 | R01_cb8564_c24476/flp0/2808 | R01_cb8564_c24476/flp0/2808 | R01_cb8564_c24476/flp0/2808 |
| R01_cb1567_c4/flp0/1922     | NA                          | NA                          | NA                          | R01_cb1567_c4/flp0/1922     |
| R01_cb9354_c3/flp0/1866     | NA                          | NA                          | NA                          | R01_cb9354_c3/flp0/1866     |
| R01_cb2879_c1/flp0/3059     | NA                          | R01_cb2879_c1/flp0/3059     | NA                          | NA                          |
| R01_cb13284_c5/flp0/1429    | NA                          | NA                          | NA                          | R01_cb13284_c5/flp0/1429    |
| R01_cb17448_c5/flp0/1415    | NA                          | R01_cb17448_c5/flp0/1415    | NA                          | NA                          |
| R01_cb8900_c4/flp0/2171     | NA                          | NA                          | NA                          | R01_cb8900_c4/flp0/2171     |
| R01_cb13856_c0/flp0/617     | NA                          | NA                          | R01_cb13856_c0/flp0/617     | NA                          |
| R01_cb12881_c0/flp0/950     | NA                          | R01_cb12881_c0/flp0/950     | NA                          | NA                          |
| R01_cb16341_c3/flp0/528     | R01_cb16341_c3/flp0/528     | R01_cb16341_c3/flp0/528     | R01_cb16341_c3/flp0/528     | R01_cb16341_c3/flp0/528     |
| R01_cb16966_c1/flp0/434     | R01_cb16966_c1/flp0/434     | R01_cb16966_c1/flp0/434     | NA                          | NA                          |

|                             |                         |                             |                             |                             |
|-----------------------------|-------------------------|-----------------------------|-----------------------------|-----------------------------|
| R01_cb7814_c11/flp0/2626    | NA                      | NA                          | NA                          | R01_cb7814_c11/flp0/2626    |
| R01_cb14030_c4/f4p0/705     | NA                      | R01_cb14030_c4/f4p0/705     | NA                          | NA                          |
| R01_cb17_c44/flp0/1099      | NA                      | R01_cb17_c44/flp0/1099      | NA                          | NA                          |
| R01_cb3445_c1/f2p1/2852     | NA                      | NA                          | NA                          | R01_cb3445_c1/f2p1/2852     |
| R01_cb17035_c2/flp0/403     | R01_cb17035_c2/flp0/403 | R01_cb17035_c2/flp0/403     | R01_cb17035_c2/flp0/403     | R01_cb17035_c2/flp0/403     |
| R01_cb18225_c0/flp0/389     | R01_cb18225_c0/flp0/389 | R01_cb18225_c0/flp0/389     | R01_cb18225_c0/flp0/389     | R01_cb18225_c0/flp0/389     |
| R01_cb12882_c1/flp1/1245    | NA                      | NA                          | NA                          | R01_cb12882_c1/flp1/1245    |
| R01_cb10355_c2/flp0/3063    | NA                      | R01_cb10355_c2/flp0/3063    | NA                          | NA                          |
| R01_cb2875_c20/flp0/3213    | NA                      | NA                          | NA                          | R01_cb2875_c20/flp0/3213    |
| R01_cb17604_c10/flp0/520    | NA                      | NA                          | R01_cb17604_c10/flp0/520    | R01_cb17604_c10/flp0/520    |
| R01_cb8564_c75293/flp0/4683 | NA                      | R01_cb8564_c75293/flp0/4683 | NA                          | NA                          |
| R01_cb18456_c7992/flp0/589  | NA                      | NA                          | R01_cb18456_c7992/flp0/589  | R01_cb18456_c7992/flp0/589  |
| R01_cb8564_c3802/flp0/2813  | NA                      | R01_cb8564_c3802/flp0/2813  | NA                          | R01_cb8564_c3802/flp0/2813  |
| R01_cb14067_c3/flp0/1762    | NA                      | R01_cb14067_c3/flp0/1762    | R01_cb14067_c3/flp0/1762    | R01_cb14067_c3/flp0/1762    |
| R01_cb13071_c1/flp0/802     | R01_cb13071_c1/flp0/802 | R01_cb13071_c1/flp0/802     | R01_cb13071_c1/flp0/802     | NA                          |
| R01_cb8564_c69207/f3p0/2096 | NA                      | R01_cb8564_c69207/f3p0/2096 | R01_cb8564_c69207/f3p0/2096 | R01_cb8564_c69207/f3p0/2096 |
| R01_cb8564_c10890/flp0/2612 | NA                      | R01_cb8564_c10890/flp0/2612 | R01_cb8564_c10890/flp0/2612 | NA                          |
| R01_cb16929_c3/flp0/439     | NA                      | R01_cb16929_c3/flp0/439     | NA                          | R01_cb16929_c3/flp0/439     |
| R01_cb16342_c2/flp0/557     | R01_cb16342_c2/flp0/557 | R01_cb16342_c2/flp0/557     | R01_cb16342_c2/flp0/557     | R01_cb16342_c2/flp0/557     |
| R01_cb8564_c7851/f2p0/2741  | NA                      | R01_cb8564_c7851/f2p0/2741  | R01_cb8564_c7851/f2p0/2741  | NA                          |
| R01_cb7221_c15/f2p1/2622    | NA                      | NA                          | NA                          | R01_cb7221_c15/f2p1/2622    |
| R01_cb9420_c1/flp0/2105     | NA                      | NA                          | NA                          | R01_cb9420_c1/flp0/2105     |
| R01_cb13289_c8/flp2/1749    | NA                      | NA                          | R01_cb13289_c8/flp2/1749    | NA                          |
| R01_cb15058_c1/flp0/1073    | NA                      | NA                          | NA                          | R01_cb15058_c1/flp0/1073    |
| R01_cb15222_c1/flp0/684     | NA                      | R01_cb15222_c1/flp0/684     | NA                          | R01_cb15222_c1/flp0/684     |
| R01_cb18753_c1/flp0/1379    | NA                      | R01_cb18753_c1/flp0/1379    | R01_cb18753_c1/flp0/1379    | R01_cb18753_c1/flp0/1379    |

|                              |                             |                              |                             |                              |
|------------------------------|-----------------------------|------------------------------|-----------------------------|------------------------------|
| R01_cb10051_c1/f1p0/2385     | NA                          | NA                           | NA                          | R01_cb10051_c1/f1p0/2385     |
| R01_cb10428_c3/f1p0/2435     | NA                          | R01_cb10428_c3/f1p0/2435     | NA                          | NA                           |
| R01_cb8801_c0/f1p0/2266      | NA                          | R01_cb8801_c0/f1p0/2266      | NA                          | NA                           |
| R01_cb8564_c52337/f1p0/2050  | R01_cb8564_c52337/f1p0/2050 | R01_cb8564_c52337/f1p0/2050  | R01_cb8564_c52337/f1p0/2050 | R01_cb8564_c52337/f1p0/2050  |
| R01_cb6845_c21/f1p1/2394     | NA                          | NA                           | NA                          | R01_cb6845_c21/f1p1/2394     |
| R01_cb8529_c3/f1p0/2056      | NA                          | NA                           | NA                          | R01_cb8529_c3/f1p0/2056      |
| R01_cb6216_c2/f1p0/2910      | NA                          | NA                           | NA                          | R01_cb6216_c2/f1p0/2910      |
| R01_cb5101_c9/f1p0/2315      | NA                          | R01_cb5101_c9/f1p0/2315      | NA                          | NA                           |
| R01_cb16410_c0/f2p0/629      | NA                          | NA                           | NA                          | R01_cb16410_c0/f2p0/629      |
| R01_cb9724_c5/f1p0/985       | NA                          | R01_cb9724_c5/f1p0/985       | NA                          | NA                           |
| R01_cb8564_c120446/f1p0/3511 | NA                          | R01_cb8564_c120446/f1p0/3511 | NA                          | NA                           |
| R01_cb12524_c2/f2p4/676      | NA                          | R01_cb12524_c2/f2p4/676      | NA                          | NA                           |
| R01_cb11147_c3/f1p0/770      | NA                          | NA                           | NA                          | R01_cb11147_c3/f1p0/770      |
| R01_cb5468_c2/f1p0/3107      | NA                          | R01_cb5468_c2/f1p0/3107      | NA                          | NA                           |
| R01_cb17483_c0/f2p0/556      | R01_cb17483_c0/f2p0/556     | R01_cb17483_c0/f2p0/556      | R01_cb17483_c0/f2p0/556     | R01_cb17483_c0/f2p0/556      |
| R01_cb14672_c3/f1p0/867      | NA                          | NA                           | NA                          | R01_cb14672_c3/f1p0/867      |
| R01_cb8564_c123891/f1p0/2434 | NA                          | R01_cb8564_c123891/f1p0/2434 | NA                          | NA                           |
| R01_cb18344_c0/f2p0/569      | NA                          | NA                           | NA                          | R01_cb18344_c0/f2p0/569      |
| R01_cb11583_c0/f1p0/1384     | NA                          | NA                           | R01_cb11583_c0/f1p0/1384    | R01_cb11583_c0/f1p0/1384     |
| R01_cb8209_c1/f1p0/2427      | NA                          | NA                           | NA                          | R01_cb8209_c1/f1p0/2427      |
| R01_cb8564_c107371/f2p3/3175 | NA                          | NA                           | NA                          | R01_cb8564_c107371/f2p3/3175 |
| R01_cb3774_c23/f1p0/2036     | NA                          | NA                           | NA                          | R01_cb3774_c23/f1p0/2036     |

|                              |                             |                              |                             |                              |
|------------------------------|-----------------------------|------------------------------|-----------------------------|------------------------------|
| R01_cb3667_c6/f1p0/2059      | NA                          | NA                           | NA                          | R01_cb3667_c6/f1p0/2059      |
| R01_cb8564_c52008/f1p0/2194  | NA                          | R01_cb8564_c52008/f1p0/2194  | NA                          | NA                           |
| R01_cb8564_c112078/f1p0/2630 | NA                          | R01_cb8564_c112078/f1p0/2630 | NA                          | NA                           |
| R01_cb8564_c115743/f1p0/2801 | NA                          | R01_cb8564_c115743/f1p0/2801 | NA                          | R01_cb8564_c115743/f1p0/2801 |
| R01_cb8564_c14624/f1p0/1901  | NA                          | R01_cb8564_c14624/f1p0/1901  | NA                          | NA                           |
| R01_cb8564_c69034/f2p0/2001  | NA                          | R01_cb8564_c69034/f2p0/2001  | R01_cb8564_c69034/f2p0/2001 | R01_cb8564_c69034/f2p0/2001  |
| R01_cb8120_c5/f1p0/2294      | NA                          | NA                           | NA                          | R01_cb8120_c5/f1p0/2294      |
| R01_cb15811_c14/f1p0/865     | NA                          | R01_cb15811_c14/f1p0/865     | R01_cb15811_c14/f1p0/865    | R01_cb15811_c14/f1p0/865     |
| R01_cb14533_c2/f1p1/1096     | NA                          | NA                           | R01_cb14533_c2/f1p1/1096    | R01_cb14533_c2/f1p1/1096     |
| R01_cb18456_c1722/f2p0/455   | NA                          | R01_cb18456_c1722/f2p0/455   | R01_cb18456_c1722/f2p0/455  | R01_cb18456_c1722/f2p0/455   |
| R01_cb540_c2/f1p0/4764       | NA                          | NA                           | NA                          | R01_cb540_c2/f1p0/4764       |
| R01_cb8564_c22565/f1p0/3743  | NA                          | NA                           | R01_cb8564_c22565/f1p0/3743 | R01_cb8564_c22565/f1p0/3743  |
| R01_cb8564_c128010/f1p0/3976 | NA                          | R01_cb8564_c128010/f1p0/3976 | NA                          | NA                           |
| R01_cb11443_c1/f1p0/3789     | NA                          | R01_cb11443_c1/f1p0/3789     | NA                          | NA                           |
| R01_cb18456_c4701/f1p0/349   | R01_cb18456_c4701/f1p0/349  | R01_cb18456_c4701/f1p0/349   | R01_cb18456_c4701/f1p0/349  | R01_cb18456_c4701/f1p0/349   |
| R01_cb3941_c93/f1p0/2611     | NA                          | R01_cb3941_c93/f1p0/2611     | R01_cb3941_c93/f1p0/2611    | R01_cb3941_c93/f1p0/2611     |
| R01_cb392_c14/f1p0/621       | NA                          | R01_cb392_c14/f1p0/621       | R01_cb392_c14/f1p0/621      | R01_cb392_c14/f1p0/621       |
| R01_cb8564_c78887/f1p0/2186  | R01_cb8564_c78887/f1p0/2186 | R01_cb8564_c78887/f1p0/2186  | R01_cb8564_c78887/f1p0/2186 | R01_cb8564_c78887/f1p0/2186  |
| R01_cb10768_c2/f1p0/2062     | NA                          | R01_cb10768_c2/f1p0/2062     | NA                          | NA                           |
| R01_cb536_c21/f1p0/498       | R01_cb536_c21/f1p0/498      | R01_cb536_c21/f1p0/498       | R01_cb536_c21/f1p0/498      | R01_cb536_c21/f1p0/498       |
| R01_cb10814_c0/f1p0/1169     | R01_cb10814_c0/f1p0/1169    | R01_cb10814_c0/f1p0/1169     | R01_cb10814_c0/f1p0/1169    | R01_cb10814_c0/f1p0/1169     |
| R01_cb13490_c2/f2p2/826      | NA                          | R01_cb13490_c2/f2p2/826      | R01_cb13490_c2/f2p2/826     | R01_cb13490_c2/f2p2/826      |

|                              |                             |                              |                              |                              |
|------------------------------|-----------------------------|------------------------------|------------------------------|------------------------------|
| R01_cb18456_c7771/f38p0/508  | R01_cb18456_c7771/f38p0/508 | R01_cb18456_c7771/f38p0/508  | R01_cb18456_c7771/f38p0/508  | R01_cb18456_c7771/f38p0/508  |
| R01_cb10385_c3/flp0/3720     | NA                          | R01_cb10385_c3/flp0/3720     | NA                           | NA                           |
| R01_cb5144_c4/flp0/2056      | R01_cb5144_c4/flp0/2056     | R01_cb5144_c4/flp0/2056      | NA                           | R01_cb5144_c4/flp0/2056      |
| R01_cb12329_c14/flp0/1384    | NA                          | NA                           | NA                           | R01_cb12329_c14/flp0/1384    |
| R01_cb8564_c1104/flp0/2522   | NA                          | R01_cb8564_c1104/flp0/2522   | R01_cb8564_c1104/flp0/2522   | NA                           |
| R01_cb16425_c7/flp0/784      | R01_cb16425_c7/flp0/784     | R01_cb16425_c7/flp0/784      | R01_cb16425_c7/flp0/784      | R01_cb16425_c7/flp0/784      |
| R01_cb14254_c1/flp0/693      | NA                          | R01_cb14254_c1/flp0/693      | NA                           | R01_cb14254_c1/flp0/693      |
| R01_cb8564_c73420/flp0/2593  | NA                          | R01_cb8564_c73420/flp0/2593  | NA                           | R01_cb8564_c73420/flp0/2593  |
| R01_cb12641_c18/flp0/880     | NA                          | R01_cb12641_c18/flp0/880     | NA                           | R01_cb12641_c18/flp0/880     |
| R01_cb3426_c3/f2p1/3451      | NA                          | NA                           | NA                           | R01_cb3426_c3/f2p1/3451      |
| R01_cb18349_c1/flp0/706      | NA                          | R01_cb18349_c1/flp0/706      | NA                           | NA                           |
| R01_cb14334_c2/f2p1/876      | NA                          | R01_cb14334_c2/f2p1/876      | NA                           | NA                           |
| R01_cb8564_c124082/flp0/3008 | NA                          | R01_cb8564_c124082/flp0/3008 | NA                           | NA                           |
| R01_cb8564_c121759/flp0/2250 | NA                          | NA                           | R01_cb8564_c121759/flp0/2250 | R01_cb8564_c121759/flp0/2250 |
| R01_cb15074_c1/f3p0/315      | R01_cb15074_c1/f3p0/315     | R01_cb15074_c1/f3p0/315      | NA                           | NA                           |
| R01_cb2648_c15/flp0/2639     | NA                          | NA                           | NA                           | R01_cb2648_c15/flp0/2639     |
| R01_cb10620_c9/flp0/671      | R01_cb10620_c9/flp0/671     | R01_cb10620_c9/flp0/671      | NA                           | NA                           |
| R01_cb1230_c8/flp0/974       | NA                          | R01_cb1230_c8/flp0/974       | R01_cb1230_c8/flp0/974       | R01_cb1230_c8/flp0/974       |
| R01_cb1228_c28/flp0/2440     | NA                          | NA                           | NA                           | R01_cb1228_c28/flp0/2440     |
| R01_cb2723_c10/flp0/2817     | NA                          | R01_cb2723_c10/flp0/2817     | NA                           | NA                           |
| R01_cb3014_c8/flp0/2250      | NA                          | R01_cb3014_c8/flp0/2250      | NA                           | NA                           |
| R01_cb10166_c3/flp0/1941     | R01_cb10166_c3/flp0/1941    | R01_cb10166_c3/flp0/1941     | NA                           | NA                           |
| R01_cb10587_c0/f2p0/566      | NA                          | R01_cb10587_c0/f2p0/566      | R01_cb10587_c0/f2p0/566      | R01_cb10587_c0/f2p0/566      |

|                              |                            |                              |                            |                            |
|------------------------------|----------------------------|------------------------------|----------------------------|----------------------------|
| R01_cb17897_c0/f2p0/733      | NA                         | NA                           | NA                         | R01_cb17897_c0/f2p0/733    |
| R01_cb536_c20/flp0/745       | R01_cb536_c20/flp0/745     | R01_cb536_c20/flp0/745       | R01_cb536_c20/flp0/745     | R01_cb536_c20/flp0/745     |
| R01_cb16642_c4/flp1/1366     | NA                         | NA                           | R01_cb16642_c4/flp1/1366   | R01_cb16642_c4/flp1/1366   |
| R01_cb781_c2/f3p0/1827       | NA                         | NA                           | NA                         | R01_cb781_c2/f3p0/1827     |
| R01_cb1093_c3/flp0/4314      | NA                         | NA                           | NA                         | R01_cb1093_c3/flp0/4314    |
| R01_cb3243_c3/flp1/2007      | NA                         | NA                           | NA                         | R01_cb3243_c3/flp1/2007    |
| R01_cb7592_c0/flp0/2563      | NA                         | R01_cb7592_c0/flp0/2563      | NA                         | NA                         |
| R01_cb11400_c1/flp0/2487     | NA                         | R01_cb11400_c1/flp0/2487     | NA                         | NA                         |
| R01_cb8564_c24205/flp0/2604  | NA                         | R01_cb8564_c24205/flp0/2604  | NA                         | NA                         |
| R01_cb17756_c20/flp0/352     | R01_cb17756_c20/flp0/352   | R01_cb17756_c20/flp0/352     | R01_cb17756_c20/flp0/352   | R01_cb17756_c20/flp0/352   |
| R01_cb5139_c4/flp0/3171      | NA                         | R01_cb5139_c4/flp0/3171      | R01_cb5139_c4/flp0/3171    | R01_cb5139_c4/flp0/3171    |
| R01_cb6777_c1/flp0/2731      | R01_cb6777_c1/flp0/2731    | R01_cb6777_c1/flp0/2731      | NA                         | R01_cb6777_c1/flp0/2731    |
| R01_cb11662_c1/flp0/2546     | NA                         | R01_cb11662_c1/flp0/2546     | NA                         | R01_cb11662_c1/flp0/2546   |
| R01_cb3807_c3/flp0/2875      | NA                         | R01_cb3807_c3/flp0/2875      | NA                         | NA                         |
| R01_cb18456_c6442/flp0/909   | R01_cb18456_c6442/flp0/909 | R01_cb18456_c6442/flp0/909   | R01_cb18456_c6442/flp0/909 | NA                         |
| R01_cb4223_c1/flp0/2582      | NA                         | NA                           | NA                         | R01_cb4223_c1/flp0/2582    |
| R01_cb18456_c7502/flp1/545   | NA                         | NA                           | NA                         | R01_cb18456_c7502/flp1/545 |
| R01_cb7104_c5/flp0/1869      | NA                         | R01_cb7104_c5/flp0/1869      | NA                         | NA                         |
| R01_cb8564_c116305/flp0/2020 | NA                         | R01_cb8564_c116305/flp0/2020 | NA                         | NA                         |
| R01_cb8669_c0/f2p0/1888      | NA                         | NA                           | R01_cb8669_c0/f2p0/1888    | NA                         |
| R01_cb9803_c2/flp0/934       | R01_cb9803_c2/flp0/934     | R01_cb9803_c2/flp0/934       | R01_cb9803_c2/flp0/934     | R01_cb9803_c2/flp0/934     |
| R01_cb18456_c4752/flp1/360   | R01_cb18456_c4752/flp1/360 | R01_cb18456_c4752/flp1/360   | R01_cb18456_c4752/flp1/360 | R01_cb18456_c4752/flp1/360 |
| R01_cb8057_c1/flp0/3112      | R01_cb8057_c1/flp0/3112    | R01_cb8057_c1/flp0/3112      | R01_cb8057_c1/flp0/3112    | R01_cb8057_c1/flp0/3112    |
| R01_cb17266_c25/flp0/1381    | R01_cb17266_c25/flp0/1381  | R01_cb17266_c25/flp0/1381    | R01_cb17266_c25/flp0/1381  | R01_cb17266_c25/flp0/1381  |
| R01_cb11501_c1/flp0/1938     | NA                         | NA                           | NA                         | R01_cb11501_c1/flp0/1938   |



|                              |                             |                              |                             |                             |
|------------------------------|-----------------------------|------------------------------|-----------------------------|-----------------------------|
| R01_cb8298_c1/flp1/2312      | R01_cb8298_c1/flp1/2312     | R01_cb8298_c1/flp1/2312      | R01_cb8298_c1/flp1/2312     | R01_cb8298_c1/flp1/2312     |
| R01_cb8688_c2/flp0/2404      | NA                          | NA                           | NA                          | R01_cb8688_c2/flp0/2404     |
| R01_cb10386_c0/f2p0/1003     | R01_cb10386_c0/f2p0/1003    | R01_cb10386_c0/f2p0/1003     | R01_cb10386_c0/f2p0/1003    | R01_cb10386_c0/f2p0/1003    |
| R01_cb18456_c7678/flp0/1882  | NA                          | R01_cb18456_c7678/flp0/1882  | NA                          | NA                          |
| R01_cb8564_c1027/flp0/1955   | NA                          | NA                           | NA                          | R01_cb8564_c1027/flp0/1955  |
| R01_cb17429_c2/flp0/322      | R01_cb17429_c2/flp0/322     | R01_cb17429_c2/flp0/322      | NA                          | R01_cb17429_c2/flp0/322     |
| R01_cb17412_c1/flp0/1450     | NA                          | R01_cb17412_c1/flp0/1450     | R01_cb17412_c1/flp0/1450    | R01_cb17412_c1/flp0/1450    |
| R01_cb8564_c82859/flp0/2107  | NA                          | R01_cb8564_c82859/flp0/2107  | NA                          | R01_cb8564_c82859/flp0/2107 |
| R01_cb6117_c1/flp0/2549      | R01_cb6117_c1/flp0/2549     | R01_cb6117_c1/flp0/2549      | NA                          | NA                          |
| R01_cb763_c4/flp0/4192       | NA                          | R01_cb763_c4/flp0/4192       | R01_cb763_c4/flp0/4192      | R01_cb763_c4/flp0/4192      |
| R01_cb12781_c1/flp0/558      | NA                          | R01_cb12781_c1/flp0/558      | NA                          | NA                          |
| R01_cb4134_c50/flp0/2932     | NA                          | NA                           | NA                          | R01_cb4134_c50/flp0/2932    |
| R01_cb8564_c3906/flp0/2659   | NA                          | R01_cb8564_c3906/flp0/2659   | NA                          | R01_cb8564_c3906/flp0/2659  |
| R01_cb8564_c24053/flp0/2918  | NA                          | R01_cb8564_c24053/flp0/2918  | NA                          | NA                          |
| R01_cb8564_c122281/flp0/2794 | NA                          | R01_cb8564_c122281/flp0/2794 | NA                          | NA                          |
| R01_cb9986_c3/flp0/458       | NA                          | NA                           | NA                          | R01_cb9986_c3/flp0/458      |
| R01_cb11905_c8/flp3/1156     | NA                          | R01_cb11905_c8/flp3/1156     | NA                          | NA                          |
| R01_cb7086_c0/flp0/2700      | NA                          | NA                           | NA                          | R01_cb7086_c0/flp0/2700     |
| R01_cb5265_c83/flp1/2645     | NA                          | R01_cb5265_c83/flp1/2645     | NA                          | NA                          |
| R01_cb8564_c86716/flp0/2030  | R01_cb8564_c86716/flp0/2030 | R01_cb8564_c86716/flp0/2030  | R01_cb8564_c86716/flp0/2030 | R01_cb8564_c86716/flp0/2030 |
| R01_cb10518_c2/flp0/960      | NA                          | R01_cb10518_c2/flp0/960      | NA                          | NA                          |
| R01_cb17584_c1/flp0/1478     | NA                          | R01_cb17584_c1/flp0/1478     | NA                          | NA                          |
| R01_cb13438_c3/flp0/1884     | NA                          | R01_cb13438_c3/flp0/1884     | R01_cb13438_c3/flp0/1884    | NA                          |
| R01_cb6742_c12/flp0/2398     | NA                          | NA                           | NA                          | R01_cb6742_c12/flp0/2398    |

|                             |                            |                             |                            |                            |
|-----------------------------|----------------------------|-----------------------------|----------------------------|----------------------------|
| R01_cb8564_c74006/f1p0/2813 | NA                         | R01_cb8564_c74006/f1p0/2813 | NA                         | NA                         |
| R01_cb8062_c1/f2p0/2258     | NA                         | R01_cb8062_c1/f2p0/2258     | NA                         | NA                         |
| R01_cb16076_c2/f1p0/669     | NA                         | NA                          | R01_cb16076_c2/f1p0/669    | R01_cb16076_c2/f1p0/669    |
| R01_cb10029_c2815/f2p0/752  | NA                         | R01_cb10029_c2815/f2p0/752  | NA                         | NA                         |
| R01_cb8564_c3243/f1p0/1951  | R01_cb8564_c3243/f1p0/1951 | R01_cb8564_c3243/f1p0/1951  | R01_cb8564_c3243/f1p0/1951 | R01_cb8564_c3243/f1p0/1951 |
| R01_cb9855_c3/f1p0/3029     | NA                         | R01_cb9855_c3/f1p0/3029     | NA                         | R01_cb9855_c3/f1p0/3029    |
| R01_cb4128_c20/f1p0/3149    | NA                         | NA                          | NA                         | R01_cb4128_c20/f1p0/3149   |
| R01_cb18107_c0/f1p0/1163    | NA                         | R01_cb18107_c0/f1p0/1163    | NA                         | R01_cb18107_c0/f1p0/1163   |
| R01_cb5706_c2/f1p0/2577     | R01_cb5706_c2/f1p0/2577    | R01_cb5706_c2/f1p0/2577     | NA                         | NA                         |
| R01_cb12240_c10/f1p0/432    | R01_cb12240_c10/f1p0/432   | R01_cb12240_c10/f1p0/432    | NA                         | NA                         |
| R01_cb10402_c2/f1p0/1390    | NA                         | R01_cb10402_c2/f1p0/1390    | NA                         | NA                         |
| R01_cb1077_c8/f2p0/1992     | NA                         | NA                          | NA                         | R01_cb1077_c8/f2p0/1992    |
| R01_cb8564_c721/f3p0/3116   | R01_cb8564_c721/f3p0/3116  | R01_cb8564_c721/f3p0/3116   | NA                         | NA                         |
| R01_cb9807_c0/f1p0/1972     | NA                         | R01_cb9807_c0/f1p0/1972     | NA                         | NA                         |
| R01_cb13390_c14/f1p0/1686   | NA                         | R01_cb13390_c14/f1p0/1686   | NA                         | R01_cb13390_c14/f1p0/1686  |
| R01_cb13199_c1/f1p0/1603    | NA                         | NA                          | NA                         | R01_cb13199_c1/f1p0/1603   |
| R01_cb7303_c6/f1p0/2762     | NA                         | NA                          | NA                         | R01_cb7303_c6/f1p0/2762    |
| R01_cb6118_c19/f1p0/430     | R01_cb6118_c19/f1p0/430    | R01_cb6118_c19/f1p0/430     | R01_cb6118_c19/f1p0/430    | R01_cb6118_c19/f1p0/430    |
| R01_cb13427_c4/f1p1/891     | NA                         | NA                          | NA                         | R01_cb13427_c4/f1p1/891    |
| R01_cb7539_c0/f2p0/2288     | NA                         | NA                          | R01_cb7539_c0/f2p0/2288    | R01_cb7539_c0/f2p0/2288    |
| R01_cb8564_c2729/f1p0/3613  | NA                         | R01_cb8564_c2729/f1p0/3613  | R01_cb8564_c2729/f1p0/3613 | R01_cb8564_c2729/f1p0/3613 |
| R01_cb17584_c0/f2p0/1649    | NA                         | NA                          | NA                         | R01_cb17584_c0/f2p0/1649   |
| R01_cb8564_c10877/f1p0/3585 | NA                         | R01_cb8564_c10877/f1p0/3585 | NA                         | NA                         |
| R01_cb4368_c14/f1p0/491     | R01_cb4368_c14/f1p0/491    | R01_cb4368_c14/f1p0/491     | R01_cb4368_c14/f1p0/491    | R01_cb4368_c14/f1p0/491    |
| R01_cb2806_c2/f1p0/3415     | NA                         | NA                          | NA                         | R01_cb2806_c2/f1p0/3415    |
| R01_cb2313_c7/f1p0/403      | NA                         | R01_cb2313_c7/f1p0/403      | R01_cb2313_c7/f1p0/403     | R01_cb2313_c7/f1p0/403     |

|                             |                             |                             |                             |                             |
|-----------------------------|-----------------------------|-----------------------------|-----------------------------|-----------------------------|
| R01_cb16078_c2/f3p0/395     | R01_cb16078_c2/f3p0/395     | R01_cb16078_c2/f3p0/395     | R01_cb16078_c2/f3p0/395     | NA                          |
| R01_cb17797_c0/flp0/971     | NA                          | R01_cb17797_c0/flp0/971     | NA                          | NA                          |
| R01_cb3228_c3/flp0/2752     | NA                          | R01_cb3228_c3/flp0/2752     | NA                          | NA                          |
| R01_cb2030_c6/f3p0/581      | NA                          | NA                          | NA                          | R01_cb2030_c6/f3p0/581      |
| R01_cb16956_c0/f4p0/544     | R01_cb16956_c0/f4p0/544     | R01_cb16956_c0/f4p0/544     | R01_cb16956_c0/f4p0/544     | R01_cb16956_c0/f4p0/544     |
| R01_cb7103_c3/flp0/1750     | NA                          | R01_cb7103_c3/flp0/1750     | NA                          | R01_cb7103_c3/flp0/1750     |
| R01_cb13651_c13/flp0/1535   | NA                          | R01_cb13651_c13/flp0/1535   | NA                          | NA                          |
| R01_cb10913_c6/flp0/1886    | NA                          | R01_cb10913_c6/flp0/1886    | NA                          | R01_cb10913_c6/flp0/1886    |
| R01_cb14192_c11/flp0/688    | R01_cb14192_c11/flp0/688    | R01_cb14192_c11/flp0/688    | R01_cb14192_c11/flp0/688    | R01_cb14192_c11/flp0/688    |
| R01_cb8564_c12792/flp0/3267 | NA                          | R01_cb8564_c12792/flp0/3267 | NA                          | NA                          |
| R01_cb15755_c1/f2p0/815     | NA                          | NA                          | NA                          | R01_cb15755_c1/f2p0/815     |
| R01_cb7719_c6/flp0/5135     | NA                          | R01_cb7719_c6/flp0/5135     | NA                          | NA                          |
| R01_cb2792_c21/flp0/3291    | NA                          | R01_cb2792_c21/flp0/3291    | NA                          | NA                          |
| R01_cb2682_c5/flp0/3554     | NA                          | NA                          | NA                          | R01_cb2682_c5/flp0/3554     |
| R01_cb7066_c0/flp0/2704     | NA                          | R01_cb7066_c0/flp0/2704     | R01_cb7066_c0/flp0/2704     | R01_cb7066_c0/flp0/2704     |
| R01_cb18634_c5/flp0/1196    | NA                          | R01_cb18634_c5/flp0/1196    | R01_cb18634_c5/flp0/1196    | R01_cb18634_c5/flp0/1196    |
| R01_cb3699_c9/flp0/2741     | NA                          | R01_cb3699_c9/flp0/2741     | NA                          | NA                          |
| R01_cb13054_c1/flp0/523     | NA                          | NA                          | R01_cb13054_c1/flp0/523     | R01_cb13054_c1/flp0/523     |
| R01_cb8564_c121394/flp0/253 | R01_cb8564_c121394/flp0/253 | R01_cb8564_c121394/flp0/253 | R01_cb8564_c121394/flp0/253 | R01_cb8564_c121394/flp0/253 |
| 3                           | 33                          | 3                           | 3                           | 3                           |
| R01_cb14429_c0/flp0/1028    | R01_cb14429_c0/flp0/1028    | R01_cb14429_c0/flp0/1028    | R01_cb14429_c0/flp0/1028    | R01_cb14429_c0/flp0/1028    |
| R01_cb8564_c80175/flp0/2488 | NA                          | R01_cb8564_c80175/flp0/2488 | R01_cb8564_c80175/flp0/2488 | NA                          |
| R01_cb15173_c1/flp0/1108    | NA                          | NA                          | NA                          | R01_cb15173_c1/flp0/1108    |
| R01_cb8611_c4/flp0/2174     | NA                          | NA                          | NA                          | R01_cb8611_c4/flp0/2174     |
| R01_cb15069_c3/flp1/546     | NA                          | R01_cb15069_c3/flp1/546     | NA                          | NA                          |
| R01_cb781_c38/flp0/1400     | NA                          | NA                          | NA                          | R01_cb781_c38/flp0/1400     |

|                             |                          |                             |                           |                             |
|-----------------------------|--------------------------|-----------------------------|---------------------------|-----------------------------|
| R01_cb2804_c105/flp0/2811   | NA                       | R01_cb2804_c105/flp0/2811   | R01_cb2804_c105/flp0/2811 | R01_cb2804_c105/flp0/2811   |
| R01_cb8564_c14097/flp1/3734 | NA                       | NA                          | NA                        | R01_cb8564_c14097/flp1/3734 |
| R01_cb943_c0/flp0/4542      | NA                       | NA                          | NA                        | R01_cb943_c0/flp0/4542      |
| R01_cb1247_c0/flp0/4224     | NA                       | R01_cb1247_c0/flp0/4224     | NA                        | NA                          |
| R01_cb9513_c35/flp0/2739    | NA                       | R01_cb9513_c35/flp0/2739    | NA                        | NA                          |
| R01_cb18172_c1/flp0/326     | R01_cb18172_c1/flp0/326  | R01_cb18172_c1/flp0/326     | NA                        | R01_cb18172_c1/flp0/326     |
| R01_cb950_c45/flp0/4455     | NA                       | R01_cb950_c45/flp0/4455     | R01_cb950_c45/flp0/4455   | NA                          |
| R01_cb8564_c70740/flp0/3814 | NA                       | R01_cb8564_c70740/flp0/3814 | NA                        | NA                          |
| R01_cb13493_c7/flp0/406     | R01_cb13493_c7/flp0/406  | R01_cb13493_c7/flp0/406     | R01_cb13493_c7/flp0/406   | R01_cb13493_c7/flp0/406     |
| R01_cb10853_c2/flp0/2911    | NA                       | R01_cb10853_c2/flp0/2911    | NA                        | NA                          |
| R01_cb8991_c15/f7p1/2056    | NA                       | NA                          | NA                        | R01_cb8991_c15/f7p1/2056    |
| R01_cb6251_c1/f3p0/2892     | R01_cb6251_c1/f3p0/2892  | R01_cb6251_c1/f3p0/2892     | NA                        | R01_cb6251_c1/f3p0/2892     |
| R01_cb16958_c1/flp0/1052    | NA                       | NA                          | NA                        | R01_cb16958_c1/flp0/1052    |
| R01_cb8020_c1/flp0/1980     | R01_cb8020_c1/flp0/1980  | R01_cb8020_c1/flp0/1980     | R01_cb8020_c1/flp0/1980   | R01_cb8020_c1/flp0/1980     |
| R01_cb11972_c2/flp0/1254    | NA                       | NA                          | NA                        | R01_cb11972_c2/flp0/1254    |
| R01_cb17019_c3/flp0/1166    | NA                       | NA                          | NA                        | R01_cb17019_c3/flp0/1166    |
| R01_cb14264_c0/f3p0/516     | NA                       | NA                          | R01_cb14264_c0/f3p0/516   | R01_cb14264_c0/f3p0/516     |
| R01_cb7825_c1/f2p0/2450     | R01_cb7825_c1/f2p0/2450  | R01_cb7825_c1/f2p0/2450     | NA                        | R01_cb7825_c1/f2p0/2450     |
| R01_cb10723_c0/f2p0/870     | NA                       | NA                          | NA                        | R01_cb10723_c0/f2p0/870     |
| R01_cb17740_c0/flp0/1594    | NA                       | NA                          | NA                        | R01_cb17740_c0/flp0/1594    |
| R01_cb11063_c0/f2p0/715     | NA                       | NA                          | NA                        | R01_cb11063_c0/f2p0/715     |
| R01_cb11321_c2/flp0/1485    | NA                       | NA                          | NA                        | R01_cb11321_c2/flp0/1485    |
| R01_cb8564_c4581/flp0/2440  | NA                       | NA                          | NA                        | R01_cb8564_c4581/flp0/2440  |
| R01_cb17154_c2/flp0/1201    | R01_cb17154_c2/flp0/1201 | R01_cb17154_c2/flp0/1201    | R01_cb17154_c2/flp0/1201  | R01_cb17154_c2/flp0/1201    |
| R01_cb10458_c5/flp1/2138    | NA                       | NA                          | NA                        | R01_cb10458_c5/flp1/2138    |
| R01_cb8564_c121536/flp0/279 | NA                       | R01_cb8564_c121536/flp0/279 | NA                        | R01_cb8564_c121536/flp0/279 |

|                             |                            |                             |                             |                             |
|-----------------------------|----------------------------|-----------------------------|-----------------------------|-----------------------------|
| 9                           |                            | 9                           |                             | 9                           |
| R01_cb4044_c4/f1p0/3942     | NA                         | R01_cb4044_c4/f1p0/3942     | NA                          | NA                          |
| R01_cb8564_c124642/f1p0/234 | NA                         | R01_cb8564_c124642/f1p0/234 | R01_cb8564_c124642/f1p0/234 | R01_cb8564_c124642/f1p0/234 |
| 5                           |                            | 5                           | 5                           | 5                           |
| R01_cb4493_c5/f2p0/1014     | NA                         | NA                          | NA                          | R01_cb4493_c5/f2p0/1014     |
| R01_cb8564_c11131/f1p0/4051 | NA                         | R01_cb8564_c11131/f1p0/4051 | R01_cb8564_c11131/f1p0/4051 | R01_cb8564_c11131/f1p0/4051 |
| R01_cb8564_c3804/f2p0/2944  | R01_cb8564_c3804/f2p0/2944 | R01_cb8564_c3804/f2p0/2944  | R01_cb8564_c3804/f2p0/2944  | NA                          |
| R01_cb6113_c12/f1p0/844     | NA                         | NA                          | NA                          | R01_cb6113_c12/f1p0/844     |
| R01_cb2226_c0/f1p0/4006     | NA                         | NA                          | NA                          | R01_cb2226_c0/f1p0/4006     |
| R01_cb5417_c0/f2p0/3113     | NA                         | R01_cb5417_c0/f2p0/3113     | R01_cb5417_c0/f2p0/3113     | R01_cb5417_c0/f2p0/3113     |
| R01_cb5996_c3/f2p0/2942     | NA                         | R01_cb5996_c3/f2p0/2942     | NA                          | NA                          |
| R01_cb13161_c3/f2p0/327     | R01_cb13161_c3/f2p0/327    | R01_cb13161_c3/f2p0/327     | R01_cb13161_c3/f2p0/327     | R01_cb13161_c3/f2p0/327     |
| R01_cb16689_c0/f1p0/750     | R01_cb16689_c0/f1p0/750    | NA                          | NA                          | R01_cb16689_c0/f1p0/750     |
| R01_cb11603_c3/f1p0/878     | R01_cb11603_c3/f1p0/878    | R01_cb11603_c3/f1p0/878     | R01_cb11603_c3/f1p0/878     | R01_cb11603_c3/f1p0/878     |
| R01_cb1031_c2/f1p0/2730     | NA                         | NA                          | NA                          | R01_cb1031_c2/f1p0/2730     |
| R01_cb10641_c3/f1p0/1455    | NA                         | NA                          | NA                          | R01_cb10641_c3/f1p0/1455    |
| R01_cb2494_c8/f1p0/3407     | R01_cb2494_c8/f1p0/3407    | R01_cb2494_c8/f1p0/3407     | R01_cb2494_c8/f1p0/3407     | R01_cb2494_c8/f1p0/3407     |
| R01_cb1301_c0/f1p0/4386     | NA                         | NA                          | NA                          | R01_cb1301_c0/f1p0/4386     |
| R01_cb15277_c1/f2p0/900     | NA                         | R01_cb15277_c1/f2p0/900     | NA                          | NA                          |
| R01_cb16752_c4/f1p0/880     | NA                         | R01_cb16752_c4/f1p0/880     | NA                          | R01_cb16752_c4/f1p0/880     |
| R01_cb8102_c24/f1p0/1791    | NA                         | R01_cb8102_c24/f1p0/1791    | NA                          | R01_cb8102_c24/f1p0/1791    |
| R01_cb12452_c5/f1p0/1595    | NA                         | NA                          | NA                          | R01_cb12452_c5/f1p0/1595    |
| R01_cb5533_c133/f1p0/2167   | NA                         | NA                          | NA                          | R01_cb5533_c133/f1p0/2167   |
| R01_cb12003_c31/f1p0/1799   | NA                         | R01_cb12003_c31/f1p0/1799   | NA                          | NA                          |
| R01_cb16721_c6/f1p0/794     | NA                         | R01_cb16721_c6/f1p0/794     | R01_cb16721_c6/f1p0/794     | R01_cb16721_c6/f1p0/794     |
| R01_cb15804_c1/f2p0/872     | NA                         | NA                          | NA                          | R01_cb15804_c1/f2p0/872     |

|                             |                          |                             |                             |                             |
|-----------------------------|--------------------------|-----------------------------|-----------------------------|-----------------------------|
| R01_cb7810_c3/flp0/862      | R01_cb7810_c3/flp0/862   | R01_cb7810_c3/flp0/862      | R01_cb7810_c3/flp0/862      | NA                          |
| R01_cb8564_c80344/flp0/2421 | NA                       | R01_cb8564_c80344/flp0/2421 | R01_cb8564_c80344/flp0/2421 | R01_cb8564_c80344/flp0/2421 |
| R01_cb8564_c5186/flp0/2130  | NA                       | NA                          | NA                          | R01_cb8564_c5186/flp0/2130  |
| R01_cb10014_c22/f7p0/575    | NA                       | R01_cb10014_c22/f7p0/575    | NA                          | NA                          |
| R01_cb1896_c66/flp0/666     | R01_cb1896_c66/flp0/666  | R01_cb1896_c66/flp0/666     | R01_cb1896_c66/flp0/666     | R01_cb1896_c66/flp0/666     |
| R01_cb11918_c19/f5p1/1082   | NA                       | NA                          | NA                          | R01_cb11918_c19/f5p1/1082   |
| R01_cb261_c40/flp0/2567     | NA                       | NA                          | NA                          | R01_cb261_c40/flp0/2567     |
| R01_cb3896_c4/flp0/2487     | R01_cb3896_c4/flp0/2487  | R01_cb3896_c4/flp0/2487     | R01_cb3896_c4/flp0/2487     | NA                          |
| R01_cb17183_c3/flp0/815     | NA                       | NA                          | NA                          | R01_cb17183_c3/flp0/815     |
| R01_cb11742_c0/f2p0/599     | NA                       | R01_cb11742_c0/f2p0/599     | NA                          | NA                          |
| R01_cb8564_c78291/flp0/2076 | NA                       | NA                          | NA                          | R01_cb8564_c78291/flp0/2076 |
| R01_cb8564_c2100/flp0/2688  | NA                       | NA                          | NA                          | R01_cb8564_c2100/flp0/2688  |
| R01_cb13761_c9/flp0/1071    | R01_cb13761_c9/flp0/1071 | R01_cb13761_c9/flp0/1071    | R01_cb13761_c9/flp0/1071    | R01_cb13761_c9/flp0/1071    |
| R01_cb8981_c3/flp0/2033     | NA                       | NA                          | NA                          | R01_cb8981_c3/flp0/2033     |
| R01_cb9380_c5/flp0/2003     | NA                       | NA                          | NA                          | R01_cb9380_c5/flp0/2003     |
| R01_cb15522_c0/f2p0/986     | NA                       | NA                          | NA                          | R01_cb15522_c0/f2p0/986     |
| R01_cb7932_c3/flp0/464      | R01_cb7932_c3/flp0/464   | R01_cb7932_c3/flp0/464      | R01_cb7932_c3/flp0/464      | R01_cb7932_c3/flp0/464      |
| R01_cb1331_c12/flp0/2731    | NA                       | R01_cb1331_c12/flp0/2731    | NA                          | NA                          |
| R01_cb16120_c1/flp0/1022    | NA                       | R01_cb16120_c1/flp0/1022    | R01_cb16120_c1/flp0/1022    | R01_cb16120_c1/flp0/1022    |
| R01_cb17046_c0/flp0/1461    | NA                       | NA                          | NA                          | R01_cb17046_c0/flp0/1461    |
| R01_cb10624_c2/flp0/3472    | NA                       | R01_cb10624_c2/flp0/3472    | NA                          | NA                          |
| R01_cb13398_c3/flp0/422     | NA                       | R01_cb13398_c3/flp0/422     | NA                          | NA                          |
| R01_cb18760_c0/flp0/5959    | R01_cb18760_c0/flp0/5959 | R01_cb18760_c0/flp0/5959    | R01_cb18760_c0/flp0/5959    | R01_cb18760_c0/flp0/5959    |
| R01_cb8954_c24/flp0/731     | NA                       | R01_cb8954_c24/flp0/731     | NA                          | NA                          |
| R01_cb8877_c1/flp0/2150     | NA                       | NA                          | NA                          | R01_cb8877_c1/flp0/2150     |
| R01_cb18759_c0/flp0/5269    | NA                       | R01_cb18759_c0/flp0/5269    | NA                          | NA                          |

|                             |                             |                             |                          |                             |
|-----------------------------|-----------------------------|-----------------------------|--------------------------|-----------------------------|
| R01_cb14078_c2/flp0/300     | R01_cb14078_c2/flp0/300     | R01_cb14078_c2/flp0/300     | R01_cb14078_c2/flp0/300  | R01_cb14078_c2/flp0/300     |
| R01_cb4471_c2/f2p3/3079     | NA                          | NA                          | NA                       | R01_cb4471_c2/f2p3/3079     |
| R01_cb16205_c0/f3p0/1642    | NA                          | NA                          | NA                       | R01_cb16205_c0/f3p0/1642    |
| R01_cb8564_c19551/flp0/3209 | R01_cb8564_c19551/flp0/3209 | R01_cb8564_c19551/flp0/3209 | NA                       | R01_cb8564_c19551/flp0/3209 |
| R01_cb10127_c2/flp0/1105    | R01_cb10127_c2/flp0/1105    | R01_cb10127_c2/flp0/1105    | NA                       | R01_cb10127_c2/flp0/1105    |
| R01_cb8564_c23126/flp1/4221 | NA                          | NA                          | NA                       | R01_cb8564_c23126/flp1/4221 |
| R01_cb1626_c16/flp0/2872    | NA                          | NA                          | NA                       | R01_cb1626_c16/flp0/2872    |
| R01_cb9609_c1/flp1/3401     | NA                          | NA                          | NA                       | R01_cb9609_c1/flp1/3401     |
| R01_cb8564_c80892/flp1/1944 | NA                          | R01_cb8564_c80892/flp1/1944 | NA                       | NA                          |
| R01_cb4169_c16/flp0/1095    | NA                          | NA                          | NA                       | R01_cb4169_c16/flp0/1095    |
| R01_cb16631_c1/flp0/539     | NA                          | R01_cb16631_c1/flp0/539     | NA                       | R01_cb16631_c1/flp0/539     |
| R01_cb17412_c0/flp0/1442    | NA                          | R01_cb17412_c0/flp0/1442    | R01_cb17412_c0/flp0/1442 | R01_cb17412_c0/flp0/1442    |
| R01_cb10778_c1/flp0/2691    | NA                          | R01_cb10778_c1/flp0/2691    | NA                       | NA                          |
| R01_cb14131_c4/f2p0/1362    | NA                          | NA                          | NA                       | R01_cb14131_c4/f2p0/1362    |
| R01_cb17307_c0/flp0/1188    | R01_cb17307_c0/flp0/1188    | R01_cb17307_c0/flp0/1188    | NA                       | R01_cb17307_c0/flp0/1188    |
| R01_cb8564_c52830/flp0/3091 | NA                          | R01_cb8564_c52830/flp0/3091 | NA                       | NA                          |
| R01_cb2095_c18/flp1/2010    | NA                          | NA                          | NA                       | R01_cb2095_c18/flp1/2010    |
| R01_cb13766_c7/flp2/1458    | NA                          | R01_cb13766_c7/flp2/1458    | NA                       | NA                          |
| R01_cb14770_c2/flp0/1105    | NA                          | NA                          | NA                       | R01_cb14770_c2/flp0/1105    |
| R01_cb6802_c10/flp0/3714    | R01_cb6802_c10/flp0/3714    | R01_cb6802_c10/flp0/3714    | R01_cb6802_c10/flp0/3714 | R01_cb6802_c10/flp0/3714    |
| R01_cb4233_c81/flp0/4601    | R01_cb4233_c81/flp0/4601    | R01_cb4233_c81/flp0/4601    | R01_cb4233_c81/flp0/4601 | R01_cb4233_c81/flp0/4601    |
| R01_cb9473_c7/flp0/1752     | NA                          | R01_cb9473_c7/flp0/1752     | NA                       | NA                          |
| R01_cb9155_c6/flp0/1036     | NA                          | R01_cb9155_c6/flp0/1036     | NA                       | NA                          |
| R01_cb8564_c90030/flp0/2483 | NA                          | R01_cb8564_c90030/flp0/2483 | NA                       | NA                          |
| R01_cb8564_c80524/flp0/3995 | NA                          | R01_cb8564_c80524/flp0/3995 | NA                       | NA                          |

|                              |                             |                             |                             |                              |
|------------------------------|-----------------------------|-----------------------------|-----------------------------|------------------------------|
| R01_cb6990_c5/f1p0/2763      | NA                          | R01_cb6990_c5/f1p0/2763     | NA                          | NA                           |
| R01_cb18549_c0/f1p0/1077     | NA                          | NA                          | NA                          | R01_cb18549_c0/f1p0/1077     |
| R01_cb1297_c15/f1p0/4176     | NA                          | NA                          | NA                          | R01_cb1297_c15/f1p0/4176     |
| R01_cb12602_c1/f1p0/1074     | NA                          | R01_cb12602_c1/f1p0/1074    | R01_cb12602_c1/f1p0/1074    | R01_cb12602_c1/f1p0/1074     |
| R01_cb10272_c3/f5p2/1680     | NA                          | NA                          | NA                          | R01_cb10272_c3/f5p2/1680     |
| R01_cb1626_c9/f1p1/2460      | NA                          | NA                          | NA                          | R01_cb1626_c9/f1p1/2460      |
| R01_cb13386_c7/f1p0/528      | NA                          | R01_cb13386_c7/f1p0/528     | NA                          | NA                           |
| R01_cb18259_c1/f1p0/737      | NA                          | NA                          | R01_cb18259_c1/f1p0/737     | NA                           |
| R01_cb2822_c2/f1p0/3718      | NA                          | R01_cb2822_c2/f1p0/3718     | NA                          | NA                           |
| R01_cb2602_c13/f1p0/1680     | NA                          | R01_cb2602_c13/f1p0/1680    | NA                          | NA                           |
| R01_cb17167_c0/f7p1/583      | NA                          | R01_cb17167_c0/f7p1/583     | NA                          | NA                           |
| R01_cb4094_c7/f5p1/2899      | NA                          | R01_cb4094_c7/f5p1/2899     | NA                          | NA                           |
| R01_cb8564_c40879/f1p0/2848  | R01_cb8564_c40879/f1p0/2848 | R01_cb8564_c40879/f1p0/2848 | R01_cb8564_c40879/f1p0/2848 | R01_cb8564_c40879/f1p0/2848  |
| R01_cb14619_c8/f2p0/1440     | NA                          | R01_cb14619_c8/f2p0/1440    | R01_cb14619_c8/f2p0/1440    | R01_cb14619_c8/f2p0/1440     |
| R01_cb18456_c5798/f1p0/682   | NA                          | NA                          | NA                          | R01_cb18456_c5798/f1p0/682   |
| R01_cb606_c5/f1p1/3393       | NA                          | NA                          | NA                          | R01_cb606_c5/f1p1/3393       |
| R01_cb13099_c0/f3p0/653      | NA                          | R01_cb13099_c0/f3p0/653     | NA                          | NA                           |
| R01_cb11718_c0/f1p0/893      | NA                          | NA                          | NA                          | R01_cb11718_c0/f1p0/893      |
| R01_cb8564_c121217/f1p0/2846 | NA                          | NA                          | NA                          | R01_cb8564_c121217/f1p0/2846 |
| R01_cb8564_c4535/f1p1/2090   | NA                          | R01_cb8564_c4535/f1p1/2090  | R01_cb8564_c4535/f1p1/2090  | R01_cb8564_c4535/f1p1/2090   |
| R01_cb5513_c4/f1p0/2795      | NA                          | NA                          | NA                          | R01_cb5513_c4/f1p0/2795      |
| R01_cb5414_c4/f2p0/3076      | NA                          | NA                          | R01_cb5414_c4/f2p0/3076     | NA                           |
| R01_cb8779_c14/f1p0/3251     | R01_cb8779_c14/f1p0/3251    | R01_cb8779_c14/f1p0/3251    | NA                          | NA                           |
| R01_cb8564_c51353/f1p0/2964  | NA                          | R01_cb8564_c51353/f1p0/2964 | NA                          | R01_cb8564_c51353/f1p0/2964  |



|                             |                             |                             |                             |                             |
|-----------------------------|-----------------------------|-----------------------------|-----------------------------|-----------------------------|
| R01_cb17199_c5/flp0/904     | NA                          | R01_cb17199_c5/flp0/904     | NA                          | NA                          |
| R01_cb1124_c7/flp0/2043     | NA                          | NA                          | NA                          | R01_cb1124_c7/flp0/2043     |
| R01_cb10385_c5/flp0/1837    | NA                          | R01_cb10385_c5/flp0/1837    | NA                          | NA                          |
| R01_cb11283_c2/flp0/546     | R01_cb11283_c2/flp0/546     | R01_cb11283_c2/flp0/546     | NA                          | R01_cb11283_c2/flp0/546     |
| R01_cb11461_c1/flp0/3729    | NA                          | R01_cb11461_c1/flp0/3729    | NA                          | R01_cb11461_c1/flp0/3729    |
| R01_cb11888_c0/flp0/1138    | NA                          | R01_cb11888_c0/flp0/1138    | R01_cb11888_c0/flp0/1138    | R01_cb11888_c0/flp0/1138    |
| R01_cb124_c28/flp0/2797     | NA                          | NA                          | NA                          | R01_cb124_c28/flp0/2797     |
| R01_cb15824_c1/flp0/1148    | NA                          | NA                          | NA                          | R01_cb15824_c1/flp0/1148    |
| R01_cb15585_c12/flp0/502    | R01_cb15585_c12/flp0/502    | R01_cb15585_c12/flp0/502    | R01_cb15585_c12/flp0/502    | R01_cb15585_c12/flp0/502    |
| R01_cb7822_c0/flp0/2475     | NA                          | NA                          | R01_cb7822_c0/flp0/2475     | R01_cb7822_c0/flp0/2475     |
| R01_cb3601_c10/flp0/2500    | NA                          | R01_cb3601_c10/flp0/2500    | NA                          | NA                          |
| R01_cb12001_c4/flp0/1844    | NA                          | R01_cb12001_c4/flp0/1844    | NA                          | NA                          |
| R01_cb10653_c5/f21p0/526    | NA                          | R01_cb10653_c5/f21p0/526    | NA                          | NA                          |
| R01_cb15364_c3/flp0/1145    | NA                          | NA                          | NA                          | R01_cb15364_c3/flp0/1145    |
| R01_cb4047_c8/flp0/2511     | NA                          | NA                          | NA                          | R01_cb4047_c8/flp0/2511     |
| R01_cb5042_c6/flp0/1108     | NA                          | NA                          | R01_cb5042_c6/flp0/1108     | NA                          |
| R01_cb8564_c76570/flp0/3381 | NA                          | R01_cb8564_c76570/flp0/3381 | NA                          | NA                          |
| R01_cb8198_c4/flp0/2054     | NA                          | NA                          | NA                          | R01_cb8198_c4/flp0/2054     |
| R01_cb5471_c8/f2p0/2562     | NA                          | NA                          | NA                          | R01_cb5471_c8/f2p0/2562     |
| R01_cb6953_c3/flp0/3317     | NA                          | R01_cb6953_c3/flp0/3317     | NA                          | R01_cb6953_c3/flp0/3317     |
| R01_cb8564_c17636/flp0/2212 | R01_cb8564_c17636/flp0/2212 | R01_cb8564_c17636/flp0/2212 | R01_cb8564_c17636/flp0/2212 | R01_cb8564_c17636/flp0/2212 |
| R01_cb8564_c69530/flp0/2919 | NA                          | NA                          | R01_cb8564_c69530/flp0/2919 | NA                          |
| R01_cb279_c11/flp1/4423     | NA                          | NA                          | NA                          | R01_cb279_c11/flp1/4423     |
| R01_cb4932_c4/flp1/3225     | NA                          | NA                          | NA                          | R01_cb4932_c4/flp1/3225     |
| R01_cb18456_c2305/flp0/1016 | NA                          | R01_cb18456_c2305/flp0/1016 | NA                          | NA                          |

|                             |                             |                             |                             |                             |
|-----------------------------|-----------------------------|-----------------------------|-----------------------------|-----------------------------|
| R01_cb12286_c7/f1p0/648     | R01_cb12286_c7/f1p0/648     | R01_cb12286_c7/f1p0/648     | NA                          | NA                          |
| R01_cb15345_c26/f1p1/1557   | NA                          | R01_cb15345_c26/f1p1/1557   | NA                          | NA                          |
| R01_cb8564_c20932/f1p0/3622 | NA                          | R01_cb8564_c20932/f1p0/3622 | NA                          | R01_cb8564_c20932/f1p0/3622 |
| R01_cb13178_c6/f3p0/494     | NA                          | R01_cb13178_c6/f3p0/494     | NA                          | NA                          |
| R01_cb11318_c0/f2p0/1159    | NA                          | NA                          | NA                          | R01_cb11318_c0/f2p0/1159    |
| R01_cb8564_c4192/f1p0/2498  | NA                          | R01_cb8564_c4192/f1p0/2498  | NA                          | R01_cb8564_c4192/f1p0/2498  |
| R01_cb4444_c25/f1p0/4660    | NA                          | R01_cb4444_c25/f1p0/4660    | NA                          | NA                          |
| R01_cb8506_c3/f1p0/1960     | R01_cb8506_c3/f1p0/1960     | R01_cb8506_c3/f1p0/1960     | NA                          | NA                          |
| R01_cb5251_c2/f1p0/1994     | NA                          | NA                          | NA                          | R01_cb5251_c2/f1p0/1994     |
| R01_cb6615_c24/f1p0/874     | NA                          | NA                          | NA                          | R01_cb6615_c24/f1p0/874     |
| R01_cb2594_c2/f1p0/622      | NA                          | R01_cb2594_c2/f1p0/622      | NA                          | NA                          |
| R01_cb11206_c1/f1p0/2097    | R01_cb11206_c1/f1p0/2097    | R01_cb11206_c1/f1p0/2097    | R01_cb11206_c1/f1p0/2097    | R01_cb11206_c1/f1p0/2097    |
| R01_cb10674_c2/f1p1/1881    | NA                          | R01_cb10674_c2/f1p1/1881    | NA                          | NA                          |
| R01_cb16182_c1/f1p1/1623    | NA                          | NA                          | NA                          | R01_cb16182_c1/f1p1/1623    |
| R01_cb8564_c121789/f1p0/225 | R01_cb8564_c121789/f1p0/225 | R01_cb8564_c121789/f1p0/225 | NA                          | NA                          |
| R01_cb8564_c80737/f1p0/2317 | NA                          | NA                          | NA                          | R01_cb8564_c80737/f1p0/2317 |
| R01_cb4128_c23/f1p0/2488    | NA                          | NA                          | NA                          | R01_cb4128_c23/f1p0/2488    |
| R01_cb5151_c1/f1p0/2796     | NA                          | NA                          | NA                          | R01_cb5151_c1/f1p0/2796     |
| R01_cb6802_c13/f1p0/3135    | R01_cb6802_c13/f1p0/3135    | R01_cb6802_c13/f1p0/3135    | R01_cb6802_c13/f1p0/3135    | R01_cb6802_c13/f1p0/3135    |
| R01_cb13761_c11/f1p0/1433   | NA                          | R01_cb13761_c11/f1p0/1433   | R01_cb13761_c11/f1p0/1433   | R01_cb13761_c11/f1p0/1433   |
| R01_cb3079_c11/f1p0/1658    | NA                          | NA                          | NA                          | R01_cb3079_c11/f1p0/1658    |
| R01_cb8564_c70588/f1p0/2189 | NA                          | R01_cb8564_c70588/f1p0/2189 | NA                          | NA                          |
| R01_cb18409_c60/f1p0/397    | R01_cb18409_c60/f1p0/397    | R01_cb18409_c60/f1p0/397    | R01_cb18409_c60/f1p0/397    | R01_cb18409_c60/f1p0/397    |
| R01_cb8564_c25155/f1p3/4069 | NA                          | R01_cb8564_c25155/f1p3/4069 | R01_cb8564_c25155/f1p3/4069 | R01_cb8564_c25155/f1p3/4069 |
| R01_cb5647_c4/f1p0/1749     | NA                          | NA                          | NA                          | R01_cb5647_c4/f1p0/1749     |

|                              |                          |                              |                             |                             |
|------------------------------|--------------------------|------------------------------|-----------------------------|-----------------------------|
| R01_cb14344_c1/flp2/1550     | NA                       | R01_cb14344_c1/flp2/1550     | R01_cb14344_c1/flp2/1550    | R01_cb14344_c1/flp2/1550    |
| R01_cb3445_c6/flp1/2781      | NA                       | NA                           | NA                          | R01_cb3445_c6/flp1/2781     |
| R01_cb7666_c8/flp0/2399      | NA                       | R01_cb7666_c8/flp0/2399      | NA                          | NA                          |
| R01_cb8904_c0/flp0/2239      | NA                       | NA                           | NA                          | R01_cb8904_c0/flp0/2239     |
| R01_cb8564_c22732/flp0/3568  | NA                       | NA                           | R01_cb8564_c22732/flp0/3568 | R01_cb8564_c22732/flp0/3568 |
| R01_cb17110_c2/flp0/1234     | NA                       | R01_cb17110_c2/flp0/1234     | R01_cb17110_c2/flp0/1234    | R01_cb17110_c2/flp0/1234    |
| R01_cb18409_c58/flp0/1658    | NA                       | NA                           | NA                          | R01_cb18409_c58/flp0/1658   |
| R01_cb5190_c5/flp1/2260      | NA                       | NA                           | NA                          | R01_cb5190_c5/flp1/2260     |
| R01_cb10761_c1/flp0/2641     | R01_cb10761_c1/flp0/2641 | R01_cb10761_c1/flp0/2641     | NA                          | NA                          |
| R01_cb2804_c65/flp0/3384     | NA                       | R01_cb2804_c65/flp0/3384     | NA                          | NA                          |
| R01_cb8564_c91334/flp0/3631  | NA                       | R01_cb8564_c91334/flp0/3631  | NA                          | R01_cb8564_c91334/flp0/3631 |
| R01_cb13760_c2/flp1/1807     | NA                       | NA                           | NA                          | R01_cb13760_c2/flp1/1807    |
| R01_cb10054_c55/f2p0/1317    | NA                       | R01_cb10054_c55/f2p0/1317    | NA                          | NA                          |
| R01_cb7108_c7/flp0/2457      | NA                       | NA                           | NA                          | R01_cb7108_c7/flp0/2457     |
| R01_cb6143_c8/flp0/1742      | NA                       | R01_cb6143_c8/flp0/1742      | R01_cb6143_c8/flp0/1742     | R01_cb6143_c8/flp0/1742     |
| R01_cb8658_c5/flp0/3411      | NA                       | NA                           | NA                          | R01_cb8658_c5/flp0/3411     |
| R01_cb1259_c7/flp1/3256      | NA                       | NA                           | NA                          | R01_cb1259_c7/flp1/3256     |
| R01_cb8564_c118410/flp1/2510 | NA                       | R01_cb8564_c118410/flp1/2510 | NA                          | NA                          |
| R01_cb15540_c7/flp1/1414     | NA                       | NA                           | NA                          | R01_cb15540_c7/flp1/1414    |
| R01_cb8400_c2/f2p0/2145      | R01_cb8400_c2/f2p0/2145  | R01_cb8400_c2/f2p0/2145      | R01_cb8400_c2/f2p0/2145     | R01_cb8400_c2/f2p0/2145     |
| R01_cb12494_c4/flp0/1114     | NA                       | R01_cb12494_c4/flp0/1114     | NA                          | NA                          |
| R01_cb12577_c5/flp1/1133     | NA                       | NA                           | NA                          | R01_cb12577_c5/flp1/1133    |
| R01_cb2807_c6/flp0/1046      | NA                       | R01_cb2807_c6/flp0/1046      | R01_cb2807_c6/flp0/1046     | R01_cb2807_c6/flp0/1046     |
| R01_cb8105_c1/flp0/3855      | NA                       | R01_cb8105_c1/flp0/3855      | NA                          | NA                          |
| R01_cb14839_c1/flp0/982      | NA                       | NA                           | R01_cb14839_c1/flp0/982     | R01_cb14839_c1/flp0/982     |

|                              |                           |                              |                             |                             |
|------------------------------|---------------------------|------------------------------|-----------------------------|-----------------------------|
| R01_cb15364_c0/flp0/1094     | NA                        | NA                           | NA                          | R01_cb15364_c0/flp0/1094    |
| R01_cb8564_c82568/f7p1/2364  | NA                        | NA                           | NA                          | R01_cb8564_c82568/f7p1/2364 |
| R01_cb17756_c31/flp0/421     | R01_cb17756_c31/flp0/421  | R01_cb17756_c31/flp0/421     | R01_cb17756_c31/flp0/421    | R01_cb17756_c31/flp0/421    |
| R01_cb15864_c1/flp0/1127     | R01_cb15864_c1/flp0/1127  | R01_cb15864_c1/flp0/1127     | R01_cb15864_c1/flp0/1127    | R01_cb15864_c1/flp0/1127    |
| R01_cb7335_c9/flp0/3031      | NA                        | R01_cb7335_c9/flp0/3031      | NA                          | NA                          |
| R01_cb18209_c1/flp0/1129     | R01_cb18209_c1/flp0/1129  | R01_cb18209_c1/flp0/1129     | NA                          | R01_cb18209_c1/flp0/1129    |
| R01_cb8564_c86288/flp0/3127  | NA                        | R01_cb8564_c86288/flp0/3127  | R01_cb8564_c86288/flp0/3127 | R01_cb8564_c86288/flp0/3127 |
| R01_cb10015_c595/f6p1/762    | R01_cb10015_c595/f6p1/762 | R01_cb10015_c595/f6p1/762    | NA                          | NA                          |
| R01_cb17277_c1/flp0/1589     | NA                        | R01_cb17277_c1/flp0/1589     | NA                          | R01_cb17277_c1/flp0/1589    |
| R01_cb18697_c2/flp0/1535     | NA                        | NA                           | NA                          | R01_cb18697_c2/flp0/1535    |
| R01_cb8564_c1437/flp0/3322   | NA                        | R01_cb8564_c1437/flp0/3322   | NA                          | NA                          |
| R01_cb3757_c2/flp0/3524      | NA                        | NA                           | NA                          | R01_cb3757_c2/flp0/3524     |
| R01_cb8564_c127695/flp0/2536 | NA                        | R01_cb8564_c127695/flp0/2536 | NA                          | NA                          |
| R01_cb18456_c7434/flp0/848   | NA                        | R01_cb18456_c7434/flp0/848   | R01_cb18456_c7434/flp0/848  | R01_cb18456_c7434/flp0/848  |
| R01_cb8564_c49600/f2p2/4344  | NA                        | NA                           | NA                          | R01_cb8564_c49600/f2p2/4344 |
| R01_cb5896_c155/flp0/2946    | NA                        | NA                           | R01_cb5896_c155/flp0/2946   | R01_cb5896_c155/flp0/2946   |
| R01_cb9533_c10/flp0/1798     | NA                        | R01_cb9533_c10/flp0/1798     | NA                          | NA                          |
| R01_cb8564_c54023/flp1/1945  | NA                        | R01_cb8564_c54023/flp1/1945  | NA                          | R01_cb8564_c54023/flp1/1945 |
| R01_cb4493_c11/flp3/4695     | NA                        | NA                           | NA                          | R01_cb4493_c11/flp3/4695    |
| R01_cb438_c8/flp0/3035       | NA                        | R01_cb438_c8/flp0/3035       | NA                          | R01_cb438_c8/flp0/3035      |
| R01_cb3887_c12/f2p0/2396     | NA                        | R01_cb3887_c12/f2p0/2396     | NA                          | NA                          |
| R01_cb15373_c2/flp0/1400     | NA                        | R01_cb15373_c2/flp0/1400     | NA                          | R01_cb15373_c2/flp0/1400    |
| R01_cb11110_c3/flp0/1566     | NA                        | NA                           | NA                          | R01_cb11110_c3/flp0/1566    |
| R01_cb4147_c16/flp1/4275     | NA                        | R01_cb4147_c16/flp1/4275     | R01_cb4147_c16/flp1/4275    | R01_cb4147_c16/flp1/4275    |
| R01_cb12972_c0/f4p0/763      | NA                        | R01_cb12972_c0/f4p0/763      | R01_cb12972_c0/f4p0/763     | R01_cb12972_c0/f4p0/763     |

|                             |                         |                             |                             |                             |
|-----------------------------|-------------------------|-----------------------------|-----------------------------|-----------------------------|
| R01_cb8564_c91954/flp0/3366 | NA                      | NA                          | NA                          | R01_cb8564_c91954/flp0/3366 |
| R01_cb14627_c0/f4p0/981     | NA                      | NA                          | NA                          | R01_cb14627_c0/f4p0/981     |
| R01_cb14715_c0/f3p0/669     | NA                      | R01_cb14715_c0/f3p0/669     | R01_cb14715_c0/f3p0/669     | R01_cb14715_c0/f3p0/669     |
| R01_cb8564_c153798/flp0/261 | NA                      | R01_cb8564_c153798/flp0/261 | R01_cb8564_c153798/flp0/261 | R01_cb8564_c153798/flp0/261 |
| 6                           |                         | 6                           | 6                           | 6                           |
| R01_cb8564_c92080/flp0/4203 | NA                      | R01_cb8564_c92080/flp0/4203 | NA                          | NA                          |
| R01_cb8564_c122627/flp0/204 | NA                      | R01_cb8564_c122627/flp0/204 | R01_cb8564_c122627/flp0/204 | R01_cb8564_c122627/flp0/204 |
| 3                           |                         | 3                           | 3                           | 3                           |
| R01_cb4785_c2/f3p0/2776     | NA                      | NA                          | NA                          | R01_cb4785_c2/f3p0/2776     |
| R01_cb5229_c3/flp0/3004     | NA                      | NA                          | NA                          | R01_cb5229_c3/flp0/3004     |
| R01_cb16334_c2/flp0/5402    | NA                      | R01_cb16334_c2/flp0/5402    | R01_cb16334_c2/flp0/5402    | NA                          |
| R01_cb3539_c2/f2p0/1181     | NA                      | R01_cb3539_c2/f2p0/1181     | NA                          | NA                          |
| R01_cb1388_c31/flp1/6318    | NA                      | NA                          | NA                          | R01_cb1388_c31/flp1/6318    |
| R01_cb5183_c116/flp0/5153   | NA                      | NA                          | NA                          | R01_cb5183_c116/flp0/5153   |
| R01_cb8564_c21684/flp0/2591 | NA                      | NA                          | R01_cb8564_c21684/flp0/2591 | R01_cb8564_c21684/flp0/2591 |
| R01_cb8564_c16600/flp0/4693 | NA                      | R01_cb8564_c16600/flp0/4693 | NA                          | NA                          |
| R01_cb8564_c1116/flp1/1964  | NA                      | R01_cb8564_c1116/flp1/1964  | NA                          | NA                          |
| R01_cb7304_c2/flp0/2611     | NA                      | NA                          | NA                          | R01_cb7304_c2/flp0/2611     |
| R01_cb8328_c4/flp0/1158     | R01_cb8328_c4/flp0/1158 | NA                          | NA                          | NA                          |
| R01_cb9853_c1/flp0/1907     | NA                      | R01_cb9853_c1/flp0/1907     | R01_cb9853_c1/flp0/1907     | NA                          |
| R01_cb1155_c0/f6p2/3977     | NA                      | NA                          | NA                          | R01_cb1155_c0/f6p2/3977     |
| R01_cb8564_c69449/flp0/3123 | NA                      | R01_cb8564_c69449/flp0/3123 | NA                          | NA                          |
| R01_cb13512_c0/flp0/1232    | NA                      | NA                          | NA                          | R01_cb13512_c0/flp0/1232    |
| R01_cb6547_c3/flp0/2827     | NA                      | NA                          | NA                          | R01_cb6547_c3/flp0/2827     |
| R01_cb10843_c6/flp2/1195    | NA                      | NA                          | NA                          | R01_cb10843_c6/flp2/1195    |
| R01_cb4784_c3/flp1/2082     | NA                      | NA                          | NA                          | R01_cb4784_c3/flp1/2082     |

|                              |                              |                              |                              |                              |
|------------------------------|------------------------------|------------------------------|------------------------------|------------------------------|
| R01_cb16447_c4/flp0/1082     | NA                           | NA                           | NA                           | R01_cb16447_c4/flp0/1082     |
| R01_cb8564_c117842/flp0/2249 | NA                           | NA                           | NA                           | R01_cb8564_c117842/flp0/2249 |
| R01_cb8564_c53691/flp0/3380  | NA                           | R01_cb8564_c53691/flp0/3380  | NA                           | NA                           |
| R01_cb3359_c28/flp0/2729     | NA                           | R01_cb3359_c28/flp0/2729     | NA                           | NA                           |
| R01_cb2991_c16/flp0/2235     | NA                           | NA                           | NA                           | R01_cb2991_c16/flp0/2235     |
| R01_cb7398_c4/flp0/1901      | NA                           | NA                           | NA                           | R01_cb7398_c4/flp0/1901      |
| R01_cb2543_c33/flp0/2215     | NA                           | R01_cb2543_c33/flp0/2215     | R01_cb2543_c33/flp0/2215     | NA                           |
| R01_cb6948_c10/flp0/2541     | NA                           | NA                           | NA                           | R01_cb6948_c10/flp0/2541     |
| R01_cb9522_c3/flp0/1794      | NA                           | NA                           | NA                           | R01_cb9522_c3/flp0/1794      |
| R01_cb8564_c120555/flp0/1972 | R01_cb8564_c120555/flp0/1972 | R01_cb8564_c120555/flp0/1972 | NA                           | NA                           |
| R01_cb3792_c6/flp0/5744      | NA                           | NA                           | NA                           | R01_cb3792_c6/flp0/5744      |
| R01_cb8564_c18708/flp0/3168  | NA                           | R01_cb8564_c18708/flp0/3168  | NA                           | NA                           |
| R01_cb8564_c18027/flp0/3948  | NA                           | NA                           | NA                           | R01_cb8564_c18027/flp0/3948  |
| R01_cb6742_c9/flp0/2591      | NA                           | NA                           | NA                           | R01_cb6742_c9/flp0/2591      |
| R01_cb8564_c87465/f2p9/3179  | NA                           | R01_cb8564_c87465/f2p9/3179  | NA                           | R01_cb8564_c87465/f2p9/3179  |
| R01_cb2997_c2/flp0/3744      | NA                           | NA                           | NA                           | R01_cb2997_c2/flp0/3744      |
| R01_cb5304_c19/flp0/2807     | NA                           | NA                           | NA                           | R01_cb5304_c19/flp0/2807     |
| R01_cb8564_c117574/flp0/2644 | NA                           | NA                           | NA                           | R01_cb8564_c117574/flp0/2644 |
| R01_cb8564_c17846/f2p0/3233  | NA                           | NA                           | NA                           | R01_cb8564_c17846/f2p0/3233  |
| R01_cb2804_c110/flp0/2555    | NA                           | R01_cb2804_c110/flp0/2555    | R01_cb2804_c110/flp0/2555    | R01_cb2804_c110/flp0/2555    |
| R01_cb8564_c116123/flp0/2206 | NA                           | NA                           | R01_cb8564_c116123/flp0/2206 | R01_cb8564_c116123/flp0/2206 |
| R01_cb8564_c123301/flp0/247  | R01_cb8564_c123301/flp0/247  | R01_cb8564_c123301/flp0/247  | R01_cb8564_c123301/flp0/247  | R01_cb8564_c123301/flp0/247  |

|                             |                            |                             |                             |                             |
|-----------------------------|----------------------------|-----------------------------|-----------------------------|-----------------------------|
| 5                           | 75                         | 5                           | 5                           | 5                           |
| R01_cb18456_c5432/f1p0/1276 | NA                         | R01_cb18456_c5432/f1p0/1276 | NA                          | R01_cb18456_c5432/f1p0/1276 |
| R01_cb5042_c2/f1p0/2318     | NA                         | NA                          | R01_cb5042_c2/f1p0/2318     | R01_cb5042_c2/f1p0/2318     |
| R01_cb13057_c4/f1p0/962     | NA                         | NA                          | NA                          | R01_cb13057_c4/f1p0/962     |
| R01_cb13026_c5/f1p0/775     | NA                         | R01_cb13026_c5/f1p0/775     | NA                          | R01_cb13026_c5/f1p0/775     |
| R01_cb18456_c6072/f1p0/370  | R01_cb18456_c6072/f1p0/370 | R01_cb18456_c6072/f1p0/370  | R01_cb18456_c6072/f1p0/370  | R01_cb18456_c6072/f1p0/370  |
| R01_cb3931_c7/f1p0/694      | NA                         | NA                          | NA                          | R01_cb3931_c7/f1p0/694      |
| R01_cb16813_c1/f1p0/372     | R01_cb16813_c1/f1p0/372    | R01_cb16813_c1/f1p0/372     | R01_cb16813_c1/f1p0/372     | R01_cb16813_c1/f1p0/372     |
| R01_cb1283_c5/f1p0/3409     | NA                         | NA                          | NA                          | R01_cb1283_c5/f1p0/3409     |
| R01_cb8564_c24039/f1p0/1907 | NA                         | R01_cb8564_c24039/f1p0/1907 | NA                          | NA                          |
| R01_cb2451_c12/f1p0/3730    | NA                         | NA                          | NA                          | R01_cb2451_c12/f1p0/3730    |
| R01_cb6352_c9/f1p0/1956     | NA                         | R01_cb6352_c9/f1p0/1956     | NA                          | R01_cb6352_c9/f1p0/1956     |
| R01_cb6947_c6/f2p0/2118     | NA                         | R01_cb6947_c6/f2p0/2118     | NA                          | R01_cb6947_c6/f2p0/2118     |
| R01_cb15811_c11/f1p0/750    | NA                         | R01_cb15811_c11/f1p0/750    | R01_cb15811_c11/f1p0/750    | R01_cb15811_c11/f1p0/750    |
| R01_cb10800_c1/f1p0/1522    | NA                         | NA                          | NA                          | R01_cb10800_c1/f1p0/1522    |
| R01_cb8564_c18575/f1p0/1939 | NA                         | R01_cb8564_c18575/f1p0/1939 | R01_cb8564_c18575/f1p0/1939 | R01_cb8564_c18575/f1p0/1939 |
| R01_cb7515_c10/f1p0/2808    | NA                         | NA                          | NA                          | R01_cb7515_c10/f1p0/2808    |
| R01_cb18456_c1340/f1p0/507  | R01_cb18456_c1340/f1p0/507 | R01_cb18456_c1340/f1p0/507  | R01_cb18456_c1340/f1p0/507  | R01_cb18456_c1340/f1p0/507  |
| R01_cb2048_c13/f1p0/1293    | R01_cb2048_c13/f1p0/1293   | R01_cb2048_c13/f1p0/1293    | NA                          | NA                          |
| R01_cb4676_c3/f1p0/709      | R01_cb4676_c3/f1p0/709     | R01_cb4676_c3/f1p0/709      | R01_cb4676_c3/f1p0/709      | R01_cb4676_c3/f1p0/709      |
| R01_cb10865_c3/f1p0/1384    | NA                         | NA                          | NA                          | R01_cb10865_c3/f1p0/1384    |
| R01_cb750_c69/f1p0/899      | R01_cb750_c69/f1p0/899     | R01_cb750_c69/f1p0/899      | R01_cb750_c69/f1p0/899      | R01_cb750_c69/f1p0/899      |
| R01_cb5552_c0/f2p0/3064     | NA                         | NA                          | NA                          | R01_cb5552_c0/f2p0/3064     |
| R01_cb4054_c1/f1p0/3451     | NA                         | R01_cb4054_c1/f1p0/3451     | NA                          | NA                          |
| R01_cb15318_c6/f2p3/600     | NA                         | NA                          | NA                          | R01_cb15318_c6/f2p3/600     |
| R01_cb8564_c122719/f1p0/257 | NA                         | NA                          | NA                          | R01_cb8564_c122719/f1p0/257 |

|                             |                             |                             |                             |                             |
|-----------------------------|-----------------------------|-----------------------------|-----------------------------|-----------------------------|
| 9                           |                             |                             |                             | 9                           |
| R01_cb14217_c3/flp0/876     | NA                          | R01_cb14217_c3/flp0/876     | R01_cb14217_c3/flp0/876     | R01_cb14217_c3/flp0/876     |
| R01_cb1856_c3/flp0/3033     | NA                          | R01_cb1856_c3/flp0/3033     | NA                          | R01_cb1856_c3/flp0/3033     |
| R01_cb6636_c4/flp0/1118     | NA                          | NA                          | NA                          | R01_cb6636_c4/flp0/1118     |
| R01_cb16182_c4/flp0/1615    | NA                          | NA                          | NA                          | R01_cb16182_c4/flp0/1615    |
| R01_cb15882_c2/flp0/1003    | NA                          | R01_cb15882_c2/flp0/1003    | NA                          | R01_cb15882_c2/flp0/1003    |
| R01_cb16341_c4/flp1/545     | R01_cb16341_c4/flp1/545     | R01_cb16341_c4/flp1/545     | R01_cb16341_c4/flp1/545     | R01_cb16341_c4/flp1/545     |
| R01_cb9995_c0/flp0/1864     | NA                          | R01_cb9995_c0/flp0/1864     | NA                          | NA                          |
| R01_cb14552_c3/flp0/1689    | NA                          | R01_cb14552_c3/flp0/1689    | NA                          | NA                          |
| R01_cb8564_c119861/flp0/222 | NA                          | R01_cb8564_c119861/flp0/222 | R01_cb8564_c119861/flp0/222 | R01_cb8564_c119861/flp0/222 |
| 6                           |                             | 6                           | 6                           | 6                           |
| R01_cb8564_c18488/flp0/3855 | NA                          | R01_cb8564_c18488/flp0/3855 | NA                          | NA                          |
| R01_cb10808_c0/flp0/1353    | NA                          | R01_cb10808_c0/flp0/1353    | NA                          | NA                          |
| R01_cb5229_c10/flp1/603     | NA                          | NA                          | R01_cb5229_c10/flp1/603     | R01_cb5229_c10/flp1/603     |
| R01_cb2698_c1/flp0/3833     | NA                          | NA                          | NA                          | R01_cb2698_c1/flp0/3833     |
| R01_cb10155_c4/flp0/2424    | NA                          | R01_cb10155_c4/flp0/2424    | NA                          | NA                          |
| R01_cb8706_c6/flp0/2039     | R01_cb8706_c6/flp0/2039     | R01_cb8706_c6/flp0/2039     | NA                          | R01_cb8706_c6/flp0/2039     |
| R01_cb17187_c1/f2p0/614     | R01_cb17187_c1/f2p0/614     | R01_cb17187_c1/f2p0/614     | NA                          | NA                          |
| R01_cb13044_c2/flp0/579     | NA                          | R01_cb13044_c2/flp0/579     | NA                          | NA                          |
| R01_cb8564_c75707/flp1/4363 | NA                          | NA                          | NA                          | R01_cb8564_c75707/flp1/4363 |
| R01_cb2302_c2/flp0/3985     | NA                          | R01_cb2302_c2/flp0/3985     | NA                          | NA                          |
| R01_cb12114_c17/flp0/944    | R01_cb12114_c17/flp0/944    | NA                          | NA                          | NA                          |
| R01_cb8564_c4906/flp0/2813  | NA                          | NA                          | NA                          | R01_cb8564_c4906/flp0/2813  |
| R01_cb11684_c0/flp0/1044    | NA                          | R01_cb11684_c0/flp0/1044    | NA                          | NA                          |
| R01_cb8564_c86964/flp0/2501 | R01_cb8564_c86964/flp0/2501 | R01_cb8564_c86964/flp0/2501 | NA                          | R01_cb8564_c86964/flp0/2501 |
|                             | 1                           |                             |                             |                             |



|                              |                          |                              |                              |                             |
|------------------------------|--------------------------|------------------------------|------------------------------|-----------------------------|
| R01_cb2055_c71/f1p1/415      | R01_cb2055_c71/f1p1/415  | R01_cb2055_c71/f1p1/415      | R01_cb2055_c71/f1p1/415      | R01_cb2055_c71/f1p1/415     |
| R01_cb5900_c132/f1p0/2808    | NA                       | R01_cb5900_c132/f1p0/2808    | NA                           | R01_cb5900_c132/f1p0/2808   |
| R01_cb7777_c1/f1p0/2534      | NA                       | R01_cb7777_c1/f1p0/2534      | NA                           | NA                          |
| R01_cb7620_c0/f1p0/2577      | NA                       | R01_cb7620_c0/f1p0/2577      | NA                           | NA                          |
| R01_cb8564_c90127/f1p0/3554  | NA                       | R01_cb8564_c90127/f1p0/3554  | NA                           | NA                          |
| R01_cb8564_c4630/f1p1/3004   | NA                       | R01_cb8564_c4630/f1p1/3004   | R01_cb8564_c4630/f1p1/3004   | R01_cb8564_c4630/f1p1/3004  |
| R01_cb16587_c1/f1p0/589      | NA                       | R01_cb16587_c1/f1p0/589      | NA                           | NA                          |
| R01_cb10448_c4/f1p0/1242     | R01_cb10448_c4/f1p0/1242 | R01_cb10448_c4/f1p0/1242     | NA                           | NA                          |
| R01_cb8564_c18034/f1p0/4267  | NA                       | R01_cb8564_c18034/f1p0/4267  | NA                           | NA                          |
| R01_cb8564_c73937/f2p2/2133  | NA                       | R01_cb8564_c73937/f2p2/2133  | R01_cb8564_c73937/f2p2/2133  | R01_cb8564_c73937/f2p2/2133 |
| R01_cb8564_c13688/f1p0/2489  | NA                       | R01_cb8564_c13688/f1p0/2489  | NA                           | R01_cb8564_c13688/f1p0/2489 |
| R01_cb4490_c14/f1p0/2307     | NA                       | NA                           | NA                           | R01_cb4490_c14/f1p0/2307    |
| R01_cb5032_c3/f1p0/1686      | NA                       | R01_cb5032_c3/f1p0/1686      | NA                           | R01_cb5032_c3/f1p0/1686     |
| R01_cb2445_c21/f1p0/3289     | NA                       | NA                           | NA                           | R01_cb2445_c21/f1p0/3289    |
| R01_cb4141_c0/f2p0/3159      | NA                       | R01_cb4141_c0/f2p0/3159      | NA                           | NA                          |
| R01_cb8564_c87314/f1p0/2163  | NA                       | R01_cb8564_c87314/f1p0/2163  | NA                           | R01_cb8564_c87314/f1p0/2163 |
| R01_cb1993_c0/f2p1/3166      | NA                       | NA                           | NA                           | R01_cb1993_c0/f2p1/3166     |
| R01_cb10615_c0/f1p0/1078     | NA                       | R01_cb10615_c0/f1p0/1078     | NA                           | NA                          |
| R01_cb8564_c123948/f1p0/3409 | NA                       | R01_cb8564_c123948/f1p0/3409 | NA                           | NA                          |
| R01_cb8131_c1/f1p0/3086      | NA                       | R01_cb8131_c1/f1p0/3086      | NA                           | R01_cb8131_c1/f1p0/3086     |
| R01_cb17721_c1/f1p0/930      | NA                       | R01_cb17721_c1/f1p0/930      | R01_cb17721_c1/f1p0/930      | R01_cb17721_c1/f1p0/930     |
| R01_cb12552_c0/f1p0/785      | NA                       | NA                           | NA                           | R01_cb12552_c0/f1p0/785     |
| R01_cb8564_c122847/f1p0/2777 | NA                       | R01_cb8564_c122847/f1p0/2777 | R01_cb8564_c122847/f1p0/2777 | NA                          |
| R01_cb18581_c1/f1p0/958      | NA                       | NA                           | NA                           | R01_cb18581_c1/f1p0/958     |

|                             |                             |                             |                             |                             |
|-----------------------------|-----------------------------|-----------------------------|-----------------------------|-----------------------------|
| R01_cb6546_c2/f2p0/2676     | NA                          | R01_cb6546_c2/f2p0/2676     | NA                          | NA                          |
| R01_cb18138_c1/f1p0/1771    | NA                          | NA                          | NA                          | R01_cb18138_c1/f1p0/1771    |
| R01_cb8564_c42230/f1p0/4284 | NA                          | R01_cb8564_c42230/f1p0/4284 | NA                          | NA                          |
| R01_cb17572_c4/f1p0/802     | NA                          | R01_cb17572_c4/f1p0/802     | R01_cb17572_c4/f1p0/802     | R01_cb17572_c4/f1p0/802     |
| R01_cb8515_c2/f1p0/2544     | NA                          | NA                          | NA                          | R01_cb8515_c2/f1p0/2544     |
| R01_cb17700_c0/f1p0/1131    | NA                          | R01_cb17700_c0/f1p0/1131    | R01_cb17700_c0/f1p0/1131    | R01_cb17700_c0/f1p0/1131    |
| R01_cb6805_c1/f1p0/2205     | NA                          | NA                          | NA                          | R01_cb6805_c1/f1p0/2205     |
| R01_cb3582_c3/f1p0/3545     | NA                          | R01_cb3582_c3/f1p0/3545     | NA                          | R01_cb3582_c3/f1p0/3545     |
| R01_cb9364_c0/f3p0/2104     | NA                          | NA                          | NA                          | R01_cb9364_c0/f3p0/2104     |
| R01_cb69_c14/f1p0/3614      | NA                          | NA                          | NA                          | R01_cb69_c14/f1p0/3614      |
| R01_cb6004_c7/f1p1/1878     | NA                          | NA                          | NA                          | R01_cb6004_c7/f1p1/1878     |
| R01_cb14937_c1/f1p0/807     | NA                          | R01_cb14937_c1/f1p0/807     | R01_cb14937_c1/f1p0/807     | R01_cb14937_c1/f1p0/807     |
| R01_cb15515_c0/f2p0/1814    | R01_cb15515_c0/f2p0/1814    | R01_cb15515_c0/f2p0/1814    | R01_cb15515_c0/f2p0/1814    | R01_cb15515_c0/f2p0/1814    |
| R01_cb14524_c10/f1p0/1106   | NA                          | R01_cb14524_c10/f1p0/1106   | NA                          | NA                          |
| R01_cb5258_c3/f1p0/1036     | NA                          | NA                          | NA                          | R01_cb5258_c3/f1p0/1036     |
| R01_cb14878_c1/f1p0/744     | NA                          | R01_cb14878_c1/f1p0/744     | R01_cb14878_c1/f1p0/744     | R01_cb14878_c1/f1p0/744     |
| R01_cb8991_c6/f1p0/2524     | NA                          | NA                          | NA                          | R01_cb8991_c6/f1p0/2524     |
| R01_cb8564_c77107/f1p0/2107 | R01_cb8564_c77107/f1p0/2107 | R01_cb8564_c77107/f1p0/2107 | R01_cb8564_c77107/f1p0/2107 | R01_cb8564_c77107/f1p0/2107 |
| R01_cb12465_c7/f1p0/516     | NA                          | R01_cb12465_c7/f1p0/516     | R01_cb12465_c7/f1p0/516     | R01_cb12465_c7/f1p0/516     |
| R01_cb8564_c89153/f1p0/3105 | R01_cb8564_c89153/f1p0/3105 | R01_cb8564_c89153/f1p0/3105 | NA                          | R01_cb8564_c89153/f1p0/3105 |
| R01_cb4637_c9/f2p0/827      | R01_cb4637_c9/f2p0/827      | NA                          | NA                          | NA                          |
| R01_cb7654_c2/f1p0/2492     | NA                          | R01_cb7654_c2/f1p0/2492     | NA                          | R01_cb7654_c2/f1p0/2492     |
| R01_cb8564_c35468/f1p0/4536 | NA                          | R01_cb8564_c35468/f1p0/4536 | NA                          | NA                          |
| R01_cb947_c44/f1p0/957      | NA                          | NA                          | NA                          | R01_cb947_c44/f1p0/957      |

|                             |                            |                             |                             |                             |
|-----------------------------|----------------------------|-----------------------------|-----------------------------|-----------------------------|
| R01_cb8564_c1106/flp0/2055  | NA                         | NA                          | R01_cb8564_c1106/flp0/2055  | NA                          |
| R01_cb6953_c5/flp0/1068     | R01_cb6953_c5/flp0/1068    | R01_cb6953_c5/flp0/1068     | R01_cb6953_c5/flp0/1068     | R01_cb6953_c5/flp0/1068     |
| R01_cb9630_c36/flp0/2967    | NA                         | R01_cb9630_c36/flp0/2967    | NA                          | NA                          |
| R01_cb18456_c7608/flp0/1780 | NA                         | NA                          | NA                          | R01_cb18456_c7608/flp0/1780 |
| R01_cb7741_c13/f7p0/574     | R01_cb7741_c13/f7p0/574    | R01_cb7741_c13/f7p0/574     | R01_cb7741_c13/f7p0/574     | R01_cb7741_c13/f7p0/574     |
| R01_cb8564_c74578/flp0/3393 | NA                         | NA                          | NA                          | R01_cb8564_c74578/flp0/3393 |
| R01_cb9901_c5/flp0/1372     | NA                         | R01_cb9901_c5/flp0/1372     | NA                          | NA                          |
| R01_cb18429_c0/flp0/796     | NA                         | R01_cb18429_c0/flp0/796     | NA                          | NA                          |
| R01_cb8564_c45829/flp0/2882 | NA                         | R01_cb8564_c45829/flp0/2882 | NA                          | R01_cb8564_c45829/flp0/2882 |
| R01_cb3017_c4/flp0/2611     | R01_cb3017_c4/flp0/2611    | R01_cb3017_c4/flp0/2611     | R01_cb3017_c4/flp0/2611     | R01_cb3017_c4/flp0/2611     |
| R01_cb9982_c0/f2p0/1901     | NA                         | R01_cb9982_c0/f2p0/1901     | NA                          | R01_cb9982_c0/f2p0/1901     |
| R01_cb8564_c1998/flp0/2561  | NA                         | R01_cb8564_c1998/flp0/2561  | NA                          | NA                          |
| R01_cb4166_c2/flp0/3422     | NA                         | R01_cb4166_c2/flp0/3422     | NA                          | NA                          |
| R01_cb8564_c3271/flp0/2435  | R01_cb8564_c3271/flp0/2435 | R01_cb8564_c3271/flp0/2435  | NA                          | NA                          |
| R01_cb8564_c70449/flp0/2914 | NA                         | NA                          | R01_cb8564_c70449/flp0/2914 | NA                          |
| R01_cb7064_c11/flp0/985     | R01_cb7064_c11/flp0/985    | R01_cb7064_c11/flp0/985     | R01_cb7064_c11/flp0/985     | R01_cb7064_c11/flp0/985     |
| R01_cb18335_c0/flp0/1689    | R01_cb18335_c0/flp0/1689   | R01_cb18335_c0/flp0/1689    | R01_cb18335_c0/flp0/1689    | R01_cb18335_c0/flp0/1689    |
| R01_cb7087_c6/flp0/2226     | NA                         | R01_cb7087_c6/flp0/2226     | NA                          | R01_cb7087_c6/flp0/2226     |
| R01_cb9535_c5/f9p1/1843     | NA                         | R01_cb9535_c5/f9p1/1843     | R01_cb9535_c5/f9p1/1843     | R01_cb9535_c5/f9p1/1843     |
| R01_cb5428_c0/flp0/3109     | R01_cb5428_c0/flp0/3109    | R01_cb5428_c0/flp0/3109     | NA                          | NA                          |
| R01_cb18456_c5723/flp8/805  | NA                         | R01_cb18456_c5723/flp8/805  | NA                          | NA                          |
| R01_cb16192_c2/flp0/1142    | NA                         | R01_cb16192_c2/flp0/1142    | NA                          | R01_cb16192_c2/flp0/1142    |
| R01_cb18456_c6507/flp0/832  | NA                         | R01_cb18456_c6507/flp0/832  | NA                          | NA                          |
| R01_cb10024_c208/flp0/959   | NA                         | NA                          | R01_cb10024_c208/flp0/959   | NA                          |
| R01_cb8564_c71010/flp0/3699 | NA                         | R01_cb8564_c71010/flp0/3699 | NA                          | NA                          |
| R01_cb7645_c2/flp0/2329     | R01_cb7645_c2/flp0/2329    | R01_cb7645_c2/flp0/2329     | R01_cb7645_c2/flp0/2329     | R01_cb7645_c2/flp0/2329     |

|                             |                            |                             |                            |                             |
|-----------------------------|----------------------------|-----------------------------|----------------------------|-----------------------------|
| R01_cb6768_c4/flp0/2585     | NA                         | R01_cb6768_c4/flp0/2585     | NA                         | NA                          |
| R01_cb13452_c0/flp0/1061    | NA                         | NA                          | NA                         | R01_cb13452_c0/flp0/1061    |
| R01_cb17470_c0/flp0/1257    | NA                         | R01_cb17470_c0/flp0/1257    | NA                         | NA                          |
| R01_cb18456_c1510/f3p0/589  | NA                         | R01_cb18456_c1510/f3p0/589  | R01_cb18456_c1510/f3p0/589 | R01_cb18456_c1510/f3p0/589  |
| R01_cb6615_c21/flp0/1151    | NA                         | NA                          | NA                         | R01_cb6615_c21/flp0/1151    |
| R01_cb15804_c3/flp0/977     | NA                         | NA                          | NA                         | R01_cb15804_c3/flp0/977     |
| R01_cb17657_c0/f2p0/881     | NA                         | NA                          | NA                         | R01_cb17657_c0/f2p0/881     |
| R01_cb8564_c35607/flp0/2587 | NA                         | R01_cb8564_c35607/flp0/2587 | NA                         | R01_cb8564_c35607/flp0/2587 |
| R01_cb18456_c7614/flp0/956  | NA                         | R01_cb18456_c7614/flp0/956  | NA                         | NA                          |
| R01_cb18456_c6902/flp0/629  | R01_cb18456_c6902/flp0/629 | R01_cb18456_c6902/flp0/629  | NA                         | R01_cb18456_c6902/flp0/629  |
| R01_cb14574_c1/flp0/462     | R01_cb14574_c1/flp0/462    | R01_cb14574_c1/flp0/462     | NA                         | R01_cb14574_c1/flp0/462     |
| R01_cb8827_c4/flp0/3061     | NA                         | R01_cb8827_c4/flp0/3061     | NA                         | NA                          |
| R01_cb8564_c84179/flp0/4163 | NA                         | R01_cb8564_c84179/flp0/4163 | NA                         | NA                          |
| R01_cb2770_c71/flp0/2441    | NA                         | R01_cb2770_c71/flp0/2441    | R01_cb2770_c71/flp0/2441   | NA                          |
| R01_cb18409_c95/flp0/942    | R01_cb18409_c95/flp0/942   | R01_cb18409_c95/flp0/942    | R01_cb18409_c95/flp0/942   | R01_cb18409_c95/flp0/942    |
| R01_cb679_c13/flp0/2623     | R01_cb679_c13/flp0/2623    | R01_cb679_c13/flp0/2623     | R01_cb679_c13/flp0/2623    | NA                          |
| R01_cb8564_c79368/flp0/2361 | NA                         | R01_cb8564_c79368/flp0/2361 | NA                         | NA                          |
| R01_cb17871_c3/flp0/857     | NA                         | R01_cb17871_c3/flp0/857     | NA                         | NA                          |
| R01_cb8564_c70508/flp0/2348 | NA                         | R01_cb8564_c70508/flp0/2348 | NA                         | NA                          |
| R01_cb5808_c4/flp0/1226     | NA                         | NA                          | NA                         | R01_cb5808_c4/flp0/1226     |
| R01_cb5756_c2/flp0/1667     | R01_cb5756_c2/flp0/1667    | R01_cb5756_c2/flp0/1667     | R01_cb5756_c2/flp0/1667    | R01_cb5756_c2/flp0/1667     |
| R01_cb391_c5/flp0/3775      | NA                         | NA                          | NA                         | R01_cb391_c5/flp0/3775      |
| R01_cb17358_c1/flp0/1623    | NA                         | NA                          | NA                         | R01_cb17358_c1/flp0/1623    |
| R01_cb10436_c4/flp1/2632    | NA                         | R01_cb10436_c4/flp1/2632    | NA                         | NA                          |
| R01_cb5338_c3/flp0/1722     | NA                         | R01_cb5338_c3/flp0/1722     | NA                         | NA                          |
| R01_cb16274_c2/flp0/776     | NA                         | R01_cb16274_c2/flp0/776     | NA                         | NA                          |

|                             |                             |                             |                             |                             |
|-----------------------------|-----------------------------|-----------------------------|-----------------------------|-----------------------------|
| R01_cb8564_c4572/flp0/2292  | NA                          | R01_cb8564_c4572/flp0/2292  | NA                          | R01_cb8564_c4572/flp0/2292  |
| R01_cb17610_c4/flp0/1359    | NA                          | R01_cb17610_c4/flp0/1359    | NA                          | R01_cb17610_c4/flp0/1359    |
| R01_cb8564_c35349/flp0/2576 | R01_cb8564_c35349/flp0/2576 | R01_cb8564_c35349/flp0/2576 | R01_cb8564_c35349/flp0/2576 | R01_cb8564_c35349/flp0/2576 |
| R01_cb13247_c3/flp0/450     | R01_cb13247_c3/flp0/450     | R01_cb13247_c3/flp0/450     | R01_cb13247_c3/flp0/450     | R01_cb13247_c3/flp0/450     |
| R01_cb13771_c5/flp0/1292    | NA                          | R01_cb13771_c5/flp0/1292    | R01_cb13771_c5/flp0/1292    | R01_cb13771_c5/flp0/1292    |
| R01_cb2367_c0/flp0/3959     | NA                          | R01_cb2367_c0/flp0/3959     | NA                          | NA                          |
| R01_cb15590_c1/flp0/679     | NA                          | R01_cb15590_c1/flp0/679     | NA                          | NA                          |
| R01_cb119_c37/flp0/2258     | NA                          | NA                          | NA                          | R01_cb119_c37/flp0/2258     |
| R01_cb8564_c1799/f2p0/3268  | NA                          | R01_cb8564_c1799/f2p0/3268  | NA                          | NA                          |
| R01_cb17973_c7/f2p0/585     | R01_cb17973_c7/f2p0/585     | R01_cb17973_c7/f2p0/585     | R01_cb17973_c7/f2p0/585     | R01_cb17973_c7/f2p0/585     |
| R01_cb15772_c2/flp0/810     | NA                          | NA                          | R01_cb15772_c2/flp0/810     | R01_cb15772_c2/flp0/810     |
| R01_cb14924_c8/flp0/923     | NA                          | R01_cb14924_c8/flp0/923     | R01_cb14924_c8/flp0/923     | R01_cb14924_c8/flp0/923     |
| R01_cb8803_c1/flp0/2386     | NA                          | R01_cb8803_c1/flp0/2386     | NA                          | NA                          |
| R01_cb8564_c35539/flp0/4052 | NA                          | R01_cb8564_c35539/flp0/4052 | NA                          | R01_cb8564_c35539/flp0/4052 |
| R01_cb16351_c0/f2p0/569     | NA                          | R01_cb16351_c0/f2p0/569     | R01_cb16351_c0/f2p0/569     | R01_cb16351_c0/f2p0/569     |
| R01_cb3292_c13/flp0/3135    | NA                          | R01_cb3292_c13/flp0/3135    | NA                          | NA                          |
| R01_cb380_c15/flp0/3104     | NA                          | R01_cb380_c15/flp0/3104     | NA                          | NA                          |
| R01_cb18456_c2279/flp1/622  | NA                          | R01_cb18456_c2279/flp1/622  | NA                          | NA                          |
| R01_cb14341_c2/flp0/644     | R01_cb14341_c2/flp0/644     | R01_cb14341_c2/flp0/644     | R01_cb14341_c2/flp0/644     | R01_cb14341_c2/flp0/644     |
| R01_cb7497_c21/f9p0/2537    | NA                          | NA                          | NA                          | R01_cb7497_c21/f9p0/2537    |
| R01_cb4819_c2/flp0/3115     | NA                          | R01_cb4819_c2/flp0/3115     | NA                          | NA                          |
| R01_cb2378_c23/flp0/3951    | NA                          | NA                          | NA                          | R01_cb2378_c23/flp0/3951    |
| R01_cb14882_c8/flp0/1272    | NA                          | NA                          | NA                          | R01_cb14882_c8/flp0/1272    |
| R01_cb8564_c88607/flp0/3417 | R01_cb8564_c88607/flp0/3417 | R01_cb8564_c88607/flp0/3417 | R01_cb8564_c88607/flp0/3417 | R01_cb8564_c88607/flp0/3417 |

|                             |                            |                             |                            |                            |
|-----------------------------|----------------------------|-----------------------------|----------------------------|----------------------------|
| R01_cb15796_c3/flp0/1454    | NA                         | NA                          | NA                         | R01_cb15796_c3/flp0/1454   |
| R01_cb3390_c14/flp0/1861    | NA                         | R01_cb3390_c14/flp0/1861    | NA                         | NA                         |
| R01_cb10261_c3/flp0/2105    | NA                         | R01_cb10261_c3/flp0/2105    | NA                         | NA                         |
| R01_cb11448_c2/flp0/1813    | NA                         | R01_cb11448_c2/flp0/1813    | NA                         | NA                         |
| R01_cb15647_c3/flp0/1516    | NA                         | NA                          | NA                         | R01_cb15647_c3/flp0/1516   |
| R01_cb11314_c3/flp0/900     | NA                         | R01_cb11314_c3/flp0/900     | NA                         | R01_cb11314_c3/flp0/900    |
| R01_cb8037_c2/flp0/2480     | NA                         | NA                          | NA                         | R01_cb8037_c2/flp0/2480    |
| R01_cb16662_c2/flp0/415     | R01_cb16662_c2/flp0/415    | R01_cb16662_c2/flp0/415     | R01_cb16662_c2/flp0/415    | R01_cb16662_c2/flp0/415    |
| R01_cb18456_c7521/flp0/613  | R01_cb18456_c7521/flp0/613 | R01_cb18456_c7521/flp0/613  | R01_cb18456_c7521/flp0/613 | R01_cb18456_c7521/flp0/613 |
| R01_cb1839_c7/flp0/1962     | NA                         | R01_cb1839_c7/flp0/1962     | NA                         | R01_cb1839_c7/flp0/1962    |
| R01_cb5896_c57/flp0/1933    | NA                         | NA                          | NA                         | R01_cb5896_c57/flp0/1933   |
| R01_cb293_c4/flp0/3063      | NA                         | NA                          | NA                         | R01_cb293_c4/flp0/3063     |
| R01_cb2844_c4/flp0/3076     | NA                         | NA                          | NA                         | R01_cb2844_c4/flp0/3076    |
| R01_cb6399_c12/flp0/546     | R01_cb6399_c12/flp0/546    | R01_cb6399_c12/flp0/546     | NA                         | NA                         |
| R01_cb10587_c5/flp0/1000    | NA                         | R01_cb10587_c5/flp0/1000    | R01_cb10587_c5/flp0/1000   | R01_cb10587_c5/flp0/1000   |
| R01_cb14148_c2/flp0/1258    | NA                         | NA                          | R01_cb14148_c2/flp0/1258   | R01_cb14148_c2/flp0/1258   |
| R01_cb9445_c2/flp0/1972     | NA                         | R01_cb9445_c2/flp0/1972     | R01_cb9445_c2/flp0/1972    | R01_cb9445_c2/flp0/1972    |
| R01_cb12092_c9/flp0/1052    | NA                         | R01_cb12092_c9/flp0/1052    | NA                         | NA                         |
| R01_cb18456_c2534/flp0/1292 | NA                         | R01_cb18456_c2534/flp0/1292 | NA                         | NA                         |
| R01_cb6655_c4/flp0/443      | R01_cb6655_c4/flp0/443     | R01_cb6655_c4/flp0/443      | R01_cb6655_c4/flp0/443     | R01_cb6655_c4/flp0/443     |
| R01_cb16760_c0/f6p0/388     | R01_cb16760_c0/f6p0/388    | R01_cb16760_c0/f6p0/388     | R01_cb16760_c0/f6p0/388    | R01_cb16760_c0/f6p0/388    |
| R01_cb8981_c5/flp0/1690     | NA                         | R01_cb8981_c5/flp0/1690     | NA                         | R01_cb8981_c5/flp0/1690    |
| R01_cb16038_c0/f2p0/505     | NA                         | R01_cb16038_c0/f2p0/505     | R01_cb16038_c0/f2p0/505    | R01_cb16038_c0/f2p0/505    |
| R01_cb18409_c52/flp0/594    | R01_cb18409_c52/flp0/594   | R01_cb18409_c52/flp0/594    | R01_cb18409_c52/flp0/594   | R01_cb18409_c52/flp0/594   |
| R01_cb2298_c4/flp1/3154     | NA                         | NA                          | NA                         | R01_cb2298_c4/flp1/3154    |
| R01_cb8564_c115764/flp0/262 | NA                         | R01_cb8564_c115764/flp0/262 | NA                         | NA                         |

|                             |                             |                             |                          |                             |
|-----------------------------|-----------------------------|-----------------------------|--------------------------|-----------------------------|
| 6                           |                             | 6                           |                          |                             |
| R01_cb8564_c37220/flp2/4071 | NA                          | NA                          | NA                       | R01_cb8564_c37220/flp2/4071 |
| R01_cb2445_c11/flp0/3504    | NA                          | NA                          | NA                       | R01_cb2445_c11/flp0/3504    |
| R01_cb7674_c1/flp0/2563     | NA                          | R01_cb7674_c1/flp0/2563     | NA                       | NA                          |
| R01_cb14317_c13/flp0/1454   | NA                          | R01_cb14317_c13/flp0/1454   | NA                       | NA                          |
| R01_cb6042_c1/flp0/3073     | NA                          | R01_cb6042_c1/flp0/3073     | NA                       | NA                          |
| R01_cb8564_c3333/flp0/3954  | NA                          | R01_cb8564_c3333/flp0/3954  | NA                       | NA                          |
| R01_cb405_c3/flp1/3781      | NA                          | R01_cb405_c3/flp1/3781      | NA                       | NA                          |
| R01_cb8104_c2/flp0/2665     | NA                          | NA                          | NA                       | R01_cb8104_c2/flp0/2665     |
| R01_cb3359_c5/f2p0/3265     | NA                          | R01_cb3359_c5/f2p0/3265     | NA                       | NA                          |
| R01_cb4582_c1/flp0/3310     | NA                          | R01_cb4582_c1/flp0/3310     | NA                       | NA                          |
| R01_cb14005_c1/flp0/724     | NA                          | R01_cb14005_c1/flp0/724     | R01_cb14005_c1/flp0/724  | NA                          |
| R01_cb737_c69/flp0/1707     | NA                          | R01_cb737_c69/flp0/1707     | NA                       | NA                          |
| R01_cb4123_c100/flp0/1220   | NA                          | R01_cb4123_c100/flp0/1220   | NA                       | NA                          |
| R01_cb10742_c9/f5p0/879     | NA                          | NA                          | NA                       | R01_cb10742_c9/f5p0/879     |
| R01_cb17046_c1/flp0/1386    | NA                          | NA                          | NA                       | R01_cb17046_c1/flp0/1386    |
| R01_cb7999_c1/flp0/2485     | R01_cb7999_c1/flp0/2485     | NA                          | NA                       | R01_cb7999_c1/flp0/2485     |
| R01_cb1132_c0/flp0/4461     | NA                          | R01_cb1132_c0/flp0/4461     | NA                       | NA                          |
| R01_cb18108_c0/f2p0/630     | NA                          | NA                          | NA                       | R01_cb18108_c0/f2p0/630     |
| R01_cb17118_c7/flp0/1440    | R01_cb17118_c7/flp0/1440    | R01_cb17118_c7/flp0/1440    | R01_cb17118_c7/flp0/1440 | R01_cb17118_c7/flp0/1440    |
| R01_cb7416_c10/flp0/1320    | NA                          | NA                          | NA                       | R01_cb7416_c10/flp0/1320    |
| R01_cb8564_c45849/flp0/2741 | NA                          | R01_cb8564_c45849/flp0/2741 | NA                       | NA                          |
| R01_cb8564_c54478/flp0/2734 | R01_cb8564_c54478/flp0/2734 | R01_cb8564_c54478/flp0/2734 | NA                       | NA                          |
| R01_cb8564_c70110/flp0/2376 | NA                          | R01_cb8564_c70110/flp0/2376 | NA                       | NA                          |
| R01_cb7089_c2/flp0/2614     | NA                          | R01_cb7089_c2/flp0/2614     | NA                       | NA                          |

|                             |                            |                             |                            |                             |
|-----------------------------|----------------------------|-----------------------------|----------------------------|-----------------------------|
| R01_cb8564_c14159/flp0/4420 | NA                         | NA                          | NA                         | R01_cb8564_c14159/flp0/4420 |
| R01_cb7303_c15/flp0/2191    | NA                         | NA                          | NA                         | R01_cb7303_c15/flp0/2191    |
| R01_cb6571_c3/flp0/1651     | NA                         | NA                          | NA                         | R01_cb6571_c3/flp0/1651     |
| R01_cb3359_c24/flp0/3501    | NA                         | R01_cb3359_c24/flp0/3501    | R01_cb3359_c24/flp0/3501   | R01_cb3359_c24/flp0/3501    |
| R01_cb4952_c6/flp0/1530     | NA                         | NA                          | NA                         | R01_cb4952_c6/flp0/1530     |
| R01_cb3444_c4/flp0/2189     | NA                         | NA                          | R01_cb3444_c4/flp0/2189    | R01_cb3444_c4/flp0/2189     |
| R01_cb8564_c76988/flp0/3903 | NA                         | R01_cb8564_c76988/flp0/3903 | NA                         | NA                          |
| R01_cb18189_c2/flp0/302     | R01_cb18189_c2/flp0/302    | R01_cb18189_c2/flp0/302     | NA                         | NA                          |
| R01_cb17756_c28/flp0/632    | NA                         | R01_cb17756_c28/flp0/632    | R01_cb17756_c28/flp0/632   | R01_cb17756_c28/flp0/632    |
| R01_cb8564_c75254/flp0/2642 | NA                         | NA                          | NA                         | R01_cb8564_c75254/flp0/2642 |
| R01_cb261_c52/flp0/1878     | NA                         | NA                          | NA                         | R01_cb261_c52/flp0/1878     |
| R01_cb18301_c41/flp0/1112   | NA                         | R01_cb18301_c41/flp0/1112   | R01_cb18301_c41/flp0/1112  | R01_cb18301_c41/flp0/1112   |
| R01_cb8475_c4/flp0/1264     | NA                         | R01_cb8475_c4/flp0/1264     | NA                         | NA                          |
| R01_cb16415_c1/flp0/853     | NA                         | R01_cb16415_c1/flp0/853     | NA                         | NA                          |
| R01_cb18456_c7580/flp0/1737 | NA                         | R01_cb18456_c7580/flp0/1737 | NA                         | NA                          |
| R01_cb5271_c16/flp0/1936    | NA                         | NA                          | NA                         | R01_cb5271_c16/flp0/1936    |
| R01_cb13185_c0/flp0/1751    | NA                         | NA                          | NA                         | R01_cb13185_c0/flp0/1751    |
| R01_cb110_c35/flp0/5257     | NA                         | NA                          | NA                         | R01_cb110_c35/flp0/5257     |
| R01_cb4737_c2/flp0/3452     | NA                         | NA                          | NA                         | R01_cb4737_c2/flp0/3452     |
| R01_cb1077_c12/flp0/3339    | NA                         | R01_cb1077_c12/flp0/3339    | NA                         | NA                          |
| R01_cb8564_c1008/flp0/2295  | R01_cb8564_c1008/flp0/2295 | R01_cb8564_c1008/flp0/2295  | NA                         | NA                          |
| R01_cb18456_c1870/flp0/366  | R01_cb18456_c1870/flp0/366 | R01_cb18456_c1870/flp0/366  | R01_cb18456_c1870/flp0/366 | R01_cb18456_c1870/flp0/366  |
| R01_cb9189_c4/flp0/2159     | NA                         | R01_cb9189_c4/flp0/2159     | NA                         | NA                          |
| R01_cb15066_c1/flp1/726     | NA                         | R01_cb15066_c1/flp1/726     | NA                         | NA                          |
| R01_cb12094_c29/flp0/5160   | NA                         | R01_cb12094_c29/flp0/5160   | NA                         | NA                          |
| R01_cb7484_c2/flp0/2401     | NA                         | R01_cb7484_c2/flp0/2401     | NA                         | R01_cb7484_c2/flp0/2401     |



|                             |                            |                             |                            |                            |
|-----------------------------|----------------------------|-----------------------------|----------------------------|----------------------------|
| R01_cb7362_c10/flp0/2570    | NA                         | R01_cb7362_c10/flp0/2570    | NA                         | NA                         |
| R01_cb7168_c15/flp0/2247    | NA                         | NA                          | NA                         | R01_cb7168_c15/flp0/2247   |
| R01_cb1221_c0/flp0/4421     | NA                         | NA                          | NA                         | R01_cb1221_c0/flp0/4421    |
| R01_cb8564_c1524/flp0/2360  | R01_cb8564_c1524/flp0/2360 | R01_cb8564_c1524/flp0/2360  | R01_cb8564_c1524/flp0/2360 | R01_cb8564_c1524/flp0/2360 |
| R01_cb11778_c1/flp0/2667    | NA                         | NA                          | R01_cb11778_c1/flp0/2667   | NA                         |
| R01_cb730_c0/flp0/4659      | NA                         | R01_cb730_c0/flp0/4659      | NA                         | R01_cb730_c0/flp0/4659     |
| R01_cb1340_c2/flp0/3014     | NA                         | R01_cb1340_c2/flp0/3014     | NA                         | NA                         |
| R01_cb10188_c5/flp0/2275    | R01_cb10188_c5/flp0/2275   | R01_cb10188_c5/flp0/2275    | NA                         | NA                         |
| R01_cb8564_c3042/flp1/2663  | NA                         | NA                          | NA                         | R01_cb8564_c3042/flp1/2663 |
| R01_cb18181_c1/flp0/1292    | NA                         | NA                          | NA                         | R01_cb18181_c1/flp0/1292   |
| R01_cb110_c26/flp1/2308     | NA                         | NA                          | NA                         | R01_cb110_c26/flp1/2308    |
| R01_cb6365_c8/flp1/2052     | NA                         | R01_cb6365_c8/flp1/2052     | NA                         | NA                         |
| R01_cb17799_c1/flp0/657     | NA                         | R01_cb17799_c1/flp0/657     | NA                         | R01_cb17799_c1/flp0/657    |
| R01_cb10539_c3/flp0/1144    | NA                         | NA                          | NA                         | R01_cb10539_c3/flp0/1144   |
| R01_cb6974_c1/flp0/2508     | NA                         | R01_cb6974_c1/flp0/2508     | NA                         | R01_cb6974_c1/flp0/2508    |
| R01_cb17973_c45/flp0/1248   | NA                         | NA                          | R01_cb17973_c45/flp0/1248  | NA                         |
| R01_cb4493_c1/f5p2/4262     | NA                         | NA                          | NA                         | R01_cb4493_c1/f5p2/4262    |
| R01_cb9196_c8/flp0/958      | R01_cb9196_c8/flp0/958     | R01_cb9196_c8/flp0/958      | R01_cb9196_c8/flp0/958     | R01_cb9196_c8/flp0/958     |
| R01_cb5903_c5/flp0/2158     | NA                         | R01_cb5903_c5/flp0/2158     | NA                         | R01_cb5903_c5/flp0/2158    |
| R01_cb1533_c10/flp0/861     | R01_cb1533_c10/flp0/861    | R01_cb1533_c10/flp0/861     | NA                         | R01_cb1533_c10/flp0/861    |
| R01_cb17610_c7/f2p0/1728    | NA                         | R01_cb17610_c7/f2p0/1728    | NA                         | R01_cb17610_c7/f2p0/1728   |
| R01_cb11113_c1/flp0/2246    | NA                         | NA                          | NA                         | R01_cb11113_c1/flp0/2246   |
| R01_cb10015_c288/flp0/705   | R01_cb10015_c288/flp0/705  | R01_cb10015_c288/flp0/705   | R01_cb10015_c288/flp0/705  | NA                         |
| R01_cb13064_c1/flp0/1748    | NA                         | NA                          | NA                         | R01_cb13064_c1/flp0/1748   |
| R01_cb15136_c0/flp0/1567    | NA                         | NA                          | NA                         | R01_cb15136_c0/flp0/1567   |
| R01_cb8564_c69762/f2p0/4058 | NA                         | R01_cb8564_c69762/f2p0/4058 | NA                         | NA                         |

|                             |                         |                             |                             |                             |
|-----------------------------|-------------------------|-----------------------------|-----------------------------|-----------------------------|
| R01_cb11648_c0/flp0/1155    | NA                      | NA                          | NA                          | R01_cb11648_c0/flp0/1155    |
| R01_cb15825_c6/flp0/1524    | NA                      | NA                          | R01_cb15825_c6/flp0/1524    | R01_cb15825_c6/flp0/1524    |
| R01_cb4444_c15/flp0/1913    | NA                      | R01_cb4444_c15/flp0/1913    | NA                          | NA                          |
| R01_cb9222_c17/flp0/4814    | NA                      | R01_cb9222_c17/flp0/4814    | NA                          | NA                          |
| R01_cb8564_c78005/flp0/1973 | NA                      | R01_cb8564_c78005/flp0/1973 | NA                          | NA                          |
| R01_cb8564_c4312/flp0/2961  | NA                      | NA                          | R01_cb8564_c4312/flp0/2961  | NA                          |
| R01_cb18456_c6820/flp0/532  | NA                      | R01_cb18456_c6820/flp0/532  | R01_cb18456_c6820/flp0/532  | NA                          |
| R01_cb11594_c1/flp0/2093    | NA                      | R01_cb11594_c1/flp0/2093    | NA                          | R01_cb11594_c1/flp0/2093    |
| R01_cb438_c11/flp1/942      | NA                      | R01_cb438_c11/flp1/942      | NA                          | R01_cb438_c11/flp1/942      |
| R01_cb8564_c71914/flp0/2596 | NA                      | R01_cb8564_c71914/flp0/2596 | R01_cb8564_c71914/flp0/2596 | R01_cb8564_c71914/flp0/2596 |
| R01_cb8260_c15/flp0/893     | R01_cb8260_c15/flp0/893 | R01_cb8260_c15/flp0/893     | R01_cb8260_c15/flp0/893     | R01_cb8260_c15/flp0/893     |
| R01_cb7592_c2/flp0/2427     | NA                      | R01_cb7592_c2/flp0/2427     | NA                          | NA                          |
| R01_cb10702_c1/flp0/2594    | NA                      | R01_cb10702_c1/flp0/2594    | R01_cb10702_c1/flp0/2594    | R01_cb10702_c1/flp0/2594    |
| R01_cb2104_c8/flp0/1922     | NA                      | NA                          | R01_cb2104_c8/flp0/1922     | R01_cb2104_c8/flp0/1922     |
| R01_cb6645_c0/flp0/2792     | NA                      | R01_cb6645_c0/flp0/2792     | R01_cb6645_c0/flp0/2792     | R01_cb6645_c0/flp0/2792     |
| R01_cb10719_c3/flp0/1171    | NA                      | R01_cb10719_c3/flp0/1171    | NA                          | NA                          |
| R01_cb1594_c15/flp1/2480    | NA                      | NA                          | NA                          | R01_cb1594_c15/flp1/2480    |
| R01_cb1835_c6/flp0/1453     | NA                      | R01_cb1835_c6/flp0/1453     | NA                          | R01_cb1835_c6/flp0/1453     |
| R01_cb8564_c14030/flp1/2977 | NA                      | R01_cb8564_c14030/flp1/2977 | R01_cb8564_c14030/flp1/2977 | R01_cb8564_c14030/flp1/2977 |
| R01_cb7612_c0/flp1/2574     | NA                      | NA                          | NA                          | R01_cb7612_c0/flp1/2574     |
| R01_cb11708_c1/flp0/1947    | NA                      | R01_cb11708_c1/flp0/1947    | NA                          | NA                          |
| R01_cb8564_c19611/flp1/4575 | NA                      | R01_cb8564_c19611/flp1/4575 | NA                          | R01_cb8564_c19611/flp1/4575 |
| R01_cb4809_c4/flp0/3009     | NA                      | NA                          | NA                          | R01_cb4809_c4/flp0/3009     |
| R01_cb3180_c0/flp0/3698     | NA                      | NA                          | NA                          | R01_cb3180_c0/flp0/3698     |
| R01_cb4964_c6/flp1/6906     | NA                      | R01_cb4964_c6/flp1/6906     | NA                          | NA                          |
| R01_cb13535_c10/flp0/1440   | NA                      | R01_cb13535_c10/flp0/1440   | NA                          | NA                          |

|                              |                         |                              |                             |                              |
|------------------------------|-------------------------|------------------------------|-----------------------------|------------------------------|
| R01_cb14971_c9/flp0/681      | R01_cb14971_c9/flp0/681 | NA                           | NA                          | R01_cb14971_c9/flp0/681      |
| R01_cb3426_c6/flp0/3094      | NA                      | NA                           | NA                          | R01_cb3426_c6/flp0/3094      |
| R01_cb6758_c8/flp1/2488      | NA                      | NA                           | NA                          | R01_cb6758_c8/flp1/2488      |
| R01_cb8564_c86664/flp0/2934  | NA                      | R01_cb8564_c86664/flp0/2934  | NA                          | NA                           |
| R01_cb8564_c34436/flp2/4197  | NA                      | NA                           | NA                          | R01_cb8564_c34436/flp2/4197  |
| R01_cb261_c20/flp0/4244      | NA                      | NA                           | NA                          | R01_cb261_c20/flp0/4244      |
| R01_cb8564_c91945/flp0/4138  | NA                      | R01_cb8564_c91945/flp0/4138  | R01_cb8564_c91945/flp0/4138 | R01_cb8564_c91945/flp0/4138  |
| R01_cb12152_c4/flp0/413      | NA                      | R01_cb12152_c4/flp0/413      | R01_cb12152_c4/flp0/413     | R01_cb12152_c4/flp0/413      |
| R01_cb8901_c6/flp0/1695      | NA                      | R01_cb8901_c6/flp0/1695      | R01_cb8901_c6/flp0/1695     | NA                           |
| R01_cb3750_c3/f4p2/2344      | NA                      | NA                           | NA                          | R01_cb3750_c3/f4p2/2344      |
| R01_cb5345_c5/flp0/3016      | R01_cb5345_c5/flp0/3016 | R01_cb5345_c5/flp0/3016      | R01_cb5345_c5/flp0/3016     | R01_cb5345_c5/flp0/3016      |
| R01_cb9274_c9/flp0/2424      | NA                      | R01_cb9274_c9/flp0/2424      | NA                          | NA                           |
| R01_cb8564_c1882/flp2/3030   | NA                      | NA                           | NA                          | R01_cb8564_c1882/flp2/3030   |
| R01_cb4233_c43/flp0/3399     | NA                      | R01_cb4233_c43/flp0/3399     | NA                          | R01_cb4233_c43/flp0/3399     |
| R01_cb6414_c0/flp1/2869      | NA                      | R01_cb6414_c0/flp1/2869      | R01_cb6414_c0/flp1/2869     | R01_cb6414_c0/flp1/2869      |
| R01_cb6865_c24/flp0/1587     | NA                      | R01_cb6865_c24/flp0/1587     | NA                          | NA                           |
| R01_cb4543_c2/flp0/2903      | NA                      | R01_cb4543_c2/flp0/2903      | R01_cb4543_c2/flp0/2903     | NA                           |
| R01_cb3234_c3/flp0/2215      | NA                      | R01_cb3234_c3/flp0/2215      | NA                          | NA                           |
| R01_cb8564_c126458/flp0/2314 | NA                      | R01_cb8564_c126458/flp0/2314 | NA                          | R01_cb8564_c126458/flp0/2314 |
| R01_cb7822_c5/flp0/681       | NA                      | NA                           | NA                          | R01_cb7822_c5/flp0/681       |
| R01_cb14708_c4/flp0/1322     | NA                      | R01_cb14708_c4/flp0/1322     | NA                          | NA                           |
| R01_cb4368_c15/flp0/473      | R01_cb4368_c15/flp0/473 | R01_cb4368_c15/flp0/473      | R01_cb4368_c15/flp0/473     | R01_cb4368_c15/flp0/473      |
| R01_cb8145_c2/flp0/1890      | NA                      | NA                           | NA                          | R01_cb8145_c2/flp0/1890      |
| R01_cb11972_c7/flp0/736      | NA                      | R01_cb11972_c7/flp0/736      | NA                          | R01_cb11972_c7/flp0/736      |
| R01_cb6645_c4/flp0/1775      | NA                      | NA                           | NA                          | R01_cb6645_c4/flp0/1775      |

|                             |                             |                             |                             |                             |
|-----------------------------|-----------------------------|-----------------------------|-----------------------------|-----------------------------|
| R01_cb8120_c4/flp0/2175     | NA                          | NA                          | NA                          | R01_cb8120_c4/flp0/2175     |
| R01_cb15792_c0/f2p0/1682    | NA                          | R01_cb15792_c0/f2p0/1682    | R01_cb15792_c0/f2p0/1682    | R01_cb15792_c0/f2p0/1682    |
| R01_cb8564_c111165/flp0/220 | NA                          | R01_cb8564_c111165/flp0/220 | R01_cb8564_c111165/flp0/220 | R01_cb8564_c111165/flp0/220 |
| 1                           |                             | 1                           | 1                           | 1                           |
| R01_cb9723_c3/flp0/1848     | NA                          | NA                          | NA                          | R01_cb9723_c3/flp0/1848     |
| R01_cb16372_c0/f8p0/445     | NA                          | NA                          | R01_cb16372_c0/f8p0/445     | R01_cb16372_c0/f8p0/445     |
| R01_cb8564_c77634/flp0/4360 | R01_cb8564_c77634/flp0/4360 | R01_cb8564_c77634/flp0/4360 | NA                          | NA                          |
| R01_cb1230_c7/flp0/3618     | NA                          | R01_cb1230_c7/flp0/3618     | R01_cb1230_c7/flp0/3618     | R01_cb1230_c7/flp0/3618     |
| R01_cb6442_c6/flp0/2577     | R01_cb6442_c6/flp0/2577     | R01_cb6442_c6/flp0/2577     | NA                          | NA                          |
| R01_cb10015_c583/flp0/479   | NA                          | R01_cb10015_c583/flp0/479   | R01_cb10015_c583/flp0/479   | R01_cb10015_c583/flp0/479   |
| R01_cb10230_c4/flp0/435     | NA                          | R01_cb10230_c4/flp0/435     | NA                          | NA                          |
| R01_cb16195_c0/f2p0/1323    | NA                          | R01_cb16195_c0/f2p0/1323    | NA                          | NA                          |
| R01_cb16746_c1/flp0/532     | NA                          | NA                          | R01_cb16746_c1/flp0/532     | R01_cb16746_c1/flp0/532     |
| R01_cb10015_c502/flp0/548   | NA                          | R01_cb10015_c502/flp0/548   | NA                          | NA                          |
| R01_cb11371_c3/flp0/1425    | NA                          | R01_cb11371_c3/flp0/1425    | NA                          | NA                          |
| R01_cb14532_c1/flp0/996     | NA                          | NA                          | NA                          | R01_cb14532_c1/flp0/996     |
| R01_cb8564_c110689/flp0/332 | R01_cb8564_c110689/flp0/332 | R01_cb8564_c110689/flp0/332 | R01_cb8564_c110689/flp0/332 | R01_cb8564_c110689/flp0/332 |
| 1                           | 21                          | 1                           | 1                           | 1                           |
| R01_cb9029_c2/flp0/2126     | NA                          | NA                          | NA                          | R01_cb9029_c2/flp0/2126     |
| R01_cb9433_c0/flp0/2082     | NA                          | R01_cb9433_c0/flp0/2082     | NA                          | NA                          |
| R01_cb16341_c6/flp1/517     | R01_cb16341_c6/flp1/517     | R01_cb16341_c6/flp1/517     | R01_cb16341_c6/flp1/517     | R01_cb16341_c6/flp1/517     |
| R01_cb12204_c2/flp0/1237    | NA                          | R01_cb12204_c2/flp0/1237    | R01_cb12204_c2/flp0/1237    | R01_cb12204_c2/flp0/1237    |
| R01_cb3613_c0/flp0/3576     | R01_cb3613_c0/flp0/3576     | R01_cb3613_c0/flp0/3576     | R01_cb3613_c0/flp0/3576     | R01_cb3613_c0/flp0/3576     |
| R01_cb1074_c1/flp0/4377     | R01_cb1074_c1/flp0/4377     | R01_cb1074_c1/flp0/4377     | R01_cb1074_c1/flp0/4377     | R01_cb1074_c1/flp0/4377     |
| R01_cb6973_c5/flp0/2729     | NA                          | R01_cb6973_c5/flp0/2729     | NA                          | NA                          |

|                              |                            |                              |                             |                             |
|------------------------------|----------------------------|------------------------------|-----------------------------|-----------------------------|
| R01_cb8564_c75785/flp0/2612  | NA                         | R01_cb8564_c75785/flp0/2612  | R01_cb8564_c75785/flp0/2612 | R01_cb8564_c75785/flp0/2612 |
| R01_cb1739_c4/flp0/3401      | NA                         | NA                           | NA                          | R01_cb1739_c4/flp0/3401     |
| R01_cb8564_c36957/flp0/3448  | NA                         | R01_cb8564_c36957/flp0/3448  | NA                          | NA                          |
| R01_cb8564_c82013/flp0/3323  | NA                         | NA                           | NA                          | R01_cb8564_c82013/flp0/3323 |
| R01_cb8564_c15290/flp0/4550  | NA                         | R01_cb8564_c15290/flp0/4550  | NA                          | NA                          |
| R01_cb8564_c85370/flp0/3037  | NA                         | R01_cb8564_c85370/flp0/3037  | R01_cb8564_c85370/flp0/3037 | R01_cb8564_c85370/flp0/3037 |
| R01_cb8865_c2/flp0/2211      | NA                         | NA                           | NA                          | R01_cb8865_c2/flp0/2211     |
| R01_cb6280_c0/flp0/2895      | R01_cb6280_c0/flp0/2895    | NA                           | NA                          | NA                          |
| R01_cb4269_c7/flp0/2973      | NA                         | NA                           | NA                          | R01_cb4269_c7/flp0/2973     |
| R01_cb8564_c113188/flp0/2625 | NA                         | R01_cb8564_c113188/flp0/2625 | NA                          | NA                          |
| R01_cb17118_c1/flp0/657      | R01_cb17118_c1/flp0/657    | R01_cb17118_c1/flp0/657      | R01_cb17118_c1/flp0/657     | R01_cb17118_c1/flp0/657     |
| R01_cb2701_c0/f3p0/3296      | NA                         | NA                           | NA                          | R01_cb2701_c0/f3p0/3296     |
| R01_cb9577_c4/flp0/1736      | R01_cb9577_c4/flp0/1736    | R01_cb9577_c4/flp0/1736      | R01_cb9577_c4/flp0/1736     | R01_cb9577_c4/flp0/1736     |
| R01_cb12420_c3/flp0/1535     | NA                         | NA                           | NA                          | R01_cb12420_c3/flp0/1535    |
| R01_cb9270_c2/flp0/2756      | R01_cb9270_c2/flp0/2756    | R01_cb9270_c2/flp0/2756      | R01_cb9270_c2/flp0/2756     | NA                          |
| R01_cb3463_c10/flp0/2833     | NA                         | R01_cb3463_c10/flp0/2833     | NA                          | NA                          |
| R01_cb8564_c23230/flp0/3818  | NA                         | R01_cb8564_c23230/flp0/3818  | NA                          | NA                          |
| R01_cb12641_c24/flp0/1080    | NA                         | NA                           | NA                          | R01_cb12641_c24/flp0/1080   |
| R01_cb12070_c1/flp0/501      | NA                         | R01_cb12070_c1/flp0/501      | R01_cb12070_c1/flp0/501     | R01_cb12070_c1/flp0/501     |
| R01_cb2465_c1/f2p0/3700      | NA                         | R01_cb2465_c1/f2p0/3700      | NA                          | R01_cb2465_c1/f2p0/3700     |
| R01_cb14627_c3/flp0/772      | NA                         | NA                           | R01_cb14627_c3/flp0/772     | R01_cb14627_c3/flp0/772     |
| R01_cb8564_c1004/flp0/2033   | R01_cb8564_c1004/flp0/2033 | R01_cb8564_c1004/flp0/2033   | NA                          | NA                          |
| R01_cb18221_c0/flp0/1090     | NA                         | NA                           | R01_cb18221_c0/flp0/1090    | R01_cb18221_c0/flp0/1090    |
| R01_cb2571_c28/flp0/4193     | NA                         | NA                           | NA                          | R01_cb2571_c28/flp0/4193    |
| R01_cb8356_c0/flp0/2393      | NA                         | R01_cb8356_c0/flp0/2393      | NA                          | NA                          |

|                             |                             |                             |                             |                             |
|-----------------------------|-----------------------------|-----------------------------|-----------------------------|-----------------------------|
| R01_cb2033_c12/flp0/3978    | NA                          | NA                          | NA                          | R01_cb2033_c12/flp0/3978    |
| R01_cb18456_c5449/flp2/597  | R01_cb18456_c5449/flp2/597  | R01_cb18456_c5449/flp2/597  | R01_cb18456_c5449/flp2/597  | R01_cb18456_c5449/flp2/597  |
| R01_cb18192_c3/flp0/804     | R01_cb18192_c3/flp0/804     | R01_cb18192_c3/flp0/804     | R01_cb18192_c3/flp0/804     | NA                          |
| R01_cb18119_c0/flp0/430     | NA                          | R01_cb18119_c0/flp0/430     | NA                          | R01_cb18119_c0/flp0/430     |
| R01_cb12593_c4/flp0/974     | NA                          | R01_cb12593_c4/flp0/974     | NA                          | NA                          |
| R01_cb8564_c90393/flp0/2948 | R01_cb8564_c90393/flp0/2948 | R01_cb8564_c90393/flp0/2948 | R01_cb8564_c90393/flp0/2948 | R01_cb8564_c90393/flp0/2948 |
| R01_cb17042_c1/flp0/873     | NA                          | NA                          | R01_cb17042_c1/flp0/873     | NA                          |
| R01_cb8564_c53318/flp0/3075 | NA                          | R01_cb8564_c53318/flp0/3075 | R01_cb8564_c53318/flp0/3075 | R01_cb8564_c53318/flp0/3075 |
| R01_cb9271_c0/f4p0/1721     | NA                          | R01_cb9271_c0/f4p0/1721     | NA                          | NA                          |
| R01_cb110_c0/flp0/2226      | NA                          | NA                          | NA                          | R01_cb110_c0/flp0/2226      |
| R01_cb14448_c1/f5p0/768     | NA                          | NA                          | NA                          | R01_cb14448_c1/f5p0/768     |
| R01_cb1258_c2/flp1/3295     | R01_cb1258_c2/flp1/3295     | R01_cb1258_c2/flp1/3295     | R01_cb1258_c2/flp1/3295     | R01_cb1258_c2/flp1/3295     |
| R01_cb1182_c0/flp0/4439     | NA                          | R01_cb1182_c0/flp0/4439     | NA                          | NA                          |
| R01_cb7841_c3/flp0/3976     | NA                          | R01_cb7841_c3/flp0/3976     | NA                          | R01_cb7841_c3/flp0/3976     |
| R01_cb11396_c1/flp0/2506    | NA                          | R01_cb11396_c1/flp0/2506    | NA                          | NA                          |
| R01_cb13433_c86/flp0/2799   | NA                          | R01_cb13433_c86/flp0/2799   | NA                          | NA                          |
| R01_cb11190_c1/flp0/1730    | NA                          | NA                          | NA                          | R01_cb11190_c1/flp0/1730    |
| R01_cb3791_c12/flp0/1510    | NA                          | NA                          | NA                          | R01_cb3791_c12/flp0/1510    |
| R01_cb6123_c11/flp0/2465    | NA                          | R01_cb6123_c11/flp0/2465    | NA                          | NA                          |
| R01_cb8064_c4/flp0/1357     | NA                          | R01_cb8064_c4/flp0/1357     | NA                          | NA                          |
| R01_cb3732_c24/flp0/2226    | NA                          | NA                          | NA                          | R01_cb3732_c24/flp0/2226    |
| R01_cb3359_c31/flp0/2357    | NA                          | R01_cb3359_c31/flp0/2357    | NA                          | R01_cb3359_c31/flp0/2357    |
| R01_cb2219_c5/flp1/1918     | NA                          | NA                          | NA                          | R01_cb2219_c5/flp1/1918     |
| R01_cb11117_c4/flp1/1055    | NA                          | R01_cb11117_c4/flp1/1055    | NA                          | NA                          |
| R01_cb15721_c0/flp0/1424    | NA                          | R01_cb15721_c0/flp0/1424    | NA                          | NA                          |

|                             |                            |                             |                            |                             |
|-----------------------------|----------------------------|-----------------------------|----------------------------|-----------------------------|
| R01_cb13028_c1/f2p0/809     | NA                         | NA                          | NA                         | R01_cb13028_c1/f2p0/809     |
| R01_cb9620_c0/f1p0/2029     | R01_cb9620_c0/f1p0/2029    | R01_cb9620_c0/f1p0/2029     | NA                         | R01_cb9620_c0/f1p0/2029     |
| R01_cb7498_c0/f1p0/2603     | NA                         | R01_cb7498_c0/f1p0/2603     | NA                         | NA                          |
| R01_cb13724_c7/f2p0/439     | NA                         | NA                          | R01_cb13724_c7/f2p0/439    | R01_cb13724_c7/f2p0/439     |
| R01_cb4953_c2/f1p0/3215     | R01_cb4953_c2/f1p0/3215    | R01_cb4953_c2/f1p0/3215     | NA                         | R01_cb4953_c2/f1p0/3215     |
| R01_cb8564_c53289/f1p0/3265 | NA                         | R01_cb8564_c53289/f1p0/3265 | NA                         | NA                          |
| R01_cb12444_c46/f1p0/748    | R01_cb12444_c46/f1p0/748   | R01_cb12444_c46/f1p0/748    | R01_cb12444_c46/f1p0/748   | R01_cb12444_c46/f1p0/748    |
| R01_cb8195_c4/f1p0/837      | NA                         | R01_cb8195_c4/f1p0/837      | NA                         | R01_cb8195_c4/f1p0/837      |
| R01_cb1892_c8/f1p0/3052     | NA                         | R01_cb1892_c8/f1p0/3052     | NA                         | NA                          |
| R01_cb11002_c0/f2p0/1515    | NA                         | NA                          | NA                         | R01_cb11002_c0/f2p0/1515    |
| R01_cb15605_c4/f1p0/849     | R01_cb15605_c4/f1p0/849    | NA                          | R01_cb15605_c4/f1p0/849    | R01_cb15605_c4/f1p0/849     |
| R01_cb13979_c29/f1p0/440    | R01_cb13979_c29/f1p0/440   | R01_cb13979_c29/f1p0/440    | R01_cb13979_c29/f1p0/440   | R01_cb13979_c29/f1p0/440    |
| R01_cb8564_c1049/f1p0/2651  | R01_cb8564_c1049/f1p0/2651 | R01_cb8564_c1049/f1p0/2651  | R01_cb8564_c1049/f1p0/2651 | R01_cb8564_c1049/f1p0/2651  |
| R01_cb15804_c2/f1p0/911     | NA                         | NA                          | NA                         | R01_cb15804_c2/f1p0/911     |
| R01_cb13507_c1/f1p0/1148    | R01_cb13507_c1/f1p0/1148   | R01_cb13507_c1/f1p0/1148    | R01_cb13507_c1/f1p0/1148   | NA                          |
| R01_cb8393_c2/f1p0/2003     | NA                         | R01_cb8393_c2/f1p0/2003     | NA                         | NA                          |
| R01_cb8564_c3685/f1p0/2452  | NA                         | R01_cb8564_c3685/f1p0/2452  | NA                         | NA                          |
| R01_cb2750_c9/f1p0/369      | NA                         | R01_cb2750_c9/f1p0/369      | NA                         | NA                          |
| R01_cb6452_c11/f1p0/1407    | NA                         | NA                          | NA                         | R01_cb6452_c11/f1p0/1407    |
| R01_cb8564_c129444/f1p0/237 | NA                         | R01_cb8564_c129444/f1p0/237 | NA                         | NA                          |
| 4                           |                            | 4                           |                            |                             |
| R01_cb6033_c2/f1p0/1294     | NA                         | NA                          | R01_cb6033_c2/f1p0/1294    | R01_cb6033_c2/f1p0/1294     |
| R01_cb8564_c73056/f1p0/4161 | NA                         | R01_cb8564_c73056/f1p0/4161 | NA                         | R01_cb8564_c73056/f1p0/4161 |
| R01_cb11077_c0/f6p1/1624    | NA                         | R01_cb11077_c0/f6p1/1624    | R01_cb11077_c0/f6p1/1624   | R01_cb11077_c0/f6p1/1624    |
| R01_cb14502_c12/f1p0/746    | R01_cb14502_c12/f1p0/746   | R01_cb14502_c12/f1p0/746    | NA                         | NA                          |
| R01_cb12520_c9/f1p0/873     | NA                         | R01_cb12520_c9/f1p0/873     | NA                         | NA                          |

|                              |                            |                              |                             |                             |
|------------------------------|----------------------------|------------------------------|-----------------------------|-----------------------------|
| R01_cb10702_c2/flp0/1731     | NA                         | NA                           | NA                          | R01_cb10702_c2/flp0/1731    |
| R01_cb4334_c3/flp0/4377      | NA                         | R01_cb4334_c3/flp0/4377      | R01_cb4334_c3/flp0/4377     | R01_cb4334_c3/flp0/4377     |
| R01_cb4115_c5/flp0/2908      | NA                         | NA                           | NA                          | R01_cb4115_c5/flp0/2908     |
| R01_cb8564_c44455/flp0/2540  | NA                         | R01_cb8564_c44455/flp0/2540  | R01_cb8564_c44455/flp0/2540 | R01_cb8564_c44455/flp0/2540 |
| R01_cb11767_c0/flp0/1856     | R01_cb11767_c0/flp0/1856   | R01_cb11767_c0/flp0/1856     | R01_cb11767_c0/flp0/1856    | R01_cb11767_c0/flp0/1856    |
| R01_cb17973_c60/flp0/1680    | R01_cb17973_c60/flp0/1680  | R01_cb17973_c60/flp0/1680    | NA                          | R01_cb17973_c60/flp0/1680   |
| R01_cb8354_c11/flp0/1554     | NA                         | NA                           | NA                          | R01_cb8354_c11/flp0/1554    |
| R01_cb293_c1/flp0/4190       | NA                         | NA                           | NA                          | R01_cb293_c1/flp0/4190      |
| R01_cb6365_c12/flp0/2331     | NA                         | R01_cb6365_c12/flp0/2331     | NA                          | NA                          |
| R01_cb8564_c112663/flp0/2320 | NA                         | R01_cb8564_c112663/flp0/2320 | NA                          | NA                          |
| R01_cb302_c7/flp0/3991       | NA                         | NA                           | NA                          | R01_cb302_c7/flp0/3991      |
| R01_cb8786_c1/flp0/2134      | NA                         | NA                           | NA                          | R01_cb8786_c1/flp0/2134     |
| R01_cb15485_c1/flp0/1209     | NA                         | NA                           | NA                          | R01_cb15485_c1/flp0/1209    |
| R01_cb15849_c0/flp0/898      | NA                         | NA                           | NA                          | R01_cb15849_c0/flp0/898     |
| R01_cb6354_c1/flp0/2101      | NA                         | NA                           | NA                          | R01_cb6354_c1/flp0/2101     |
| R01_cb13026_c4/flp0/679      | R01_cb13026_c4/flp0/679    | R01_cb13026_c4/flp0/679      | R01_cb13026_c4/flp0/679     | R01_cb13026_c4/flp0/679     |
| R01_cb8513_c2/flp0/1631      | NA                         | NA                           | NA                          | R01_cb8513_c2/flp0/1631     |
| R01_cb13396_c3/flp0/1287     | NA                         | R01_cb13396_c3/flp0/1287     | R01_cb13396_c3/flp0/1287    | R01_cb13396_c3/flp0/1287    |
| R01_cb6199_c21/flp0/3005     | NA                         | NA                           | NA                          | R01_cb6199_c21/flp0/3005    |
| R01_cb8564_c2875/flp0/3292   | NA                         | R01_cb8564_c2875/flp0/3292   | R01_cb8564_c2875/flp0/3292  | NA                          |
| R01_cb13161_c9/flp0/1486     | NA                         | R01_cb13161_c9/flp0/1486     | NA                          | R01_cb13161_c9/flp0/1486    |
| R01_cb10778_c2/flp0/888      | NA                         | R01_cb10778_c2/flp0/888      | NA                          | NA                          |
| R01_cb4000_c3/flp0/2269      | NA                         | R01_cb4000_c3/flp0/2269      | NA                          | NA                          |
| R01_cb17973_c14/flp0/1672    | R01_cb17973_c14/flp0/1672  | R01_cb17973_c14/flp0/1672    | R01_cb17973_c14/flp0/1672   | NA                          |
| R01_cb18456_c1877/flp0/496   | R01_cb18456_c1877/flp0/496 | R01_cb18456_c1877/flp0/496   | R01_cb18456_c1877/flp0/496  | R01_cb18456_c1877/flp0/496  |



|                                  |                                  |                                  |                                  |                                  |
|----------------------------------|----------------------------------|----------------------------------|----------------------------------|----------------------------------|
| R01_cb10742_c1/f1p0/911          | NA                               | NA                               | NA                               | R01_cb10742_c1/f1p0/911          |
| R01_cb10017_c146/f1p0/983        | NA                               | R01_cb10017_c146/f1p0/983        | NA                               | NA                               |
| R01_cb10145_c7/f2p0/1566         | NA                               | NA                               | NA                               | R01_cb10145_c7/f2p0/1566         |
| R01_cb8564_c127412/f1p0/226<br>2 | NA                               | R01_cb8564_c127412/f1p0/226<br>2 | NA                               | R01_cb8564_c127412/f1p0/226<br>2 |
| R01_cb17869_c3/f1p0/1681         | NA                               | NA                               | NA                               | R01_cb17869_c3/f1p0/1681         |
| R01_cb7171_c19/f3p1/2330         | NA                               | NA                               | NA                               | R01_cb7171_c19/f3p1/2330         |
| R01_cb8564_c34231/f2p1/3144<br>4 | R01_cb8564_c34231/f2p1/3144<br>4 | R01_cb8564_c34231/f2p1/3144      | R01_cb8564_c34231/f2p1/3144      | R01_cb8564_c34231/f2p1/3144      |
| R01_cb3381_c12/f1p0/3573         | NA                               | R01_cb3381_c12/f1p0/3573         | NA                               | R01_cb3381_c12/f1p0/3573         |
| R01_cb6969_c7/f1p0/2591          | NA                               | R01_cb6969_c7/f1p0/2591          | NA                               | NA                               |
| R01_cb8564_c22629/f1p0/2616      | NA                               | R01_cb8564_c22629/f1p0/2616      | NA                               | NA                               |
| R01_cb8564_c146700/f2p0/228<br>4 | NA                               | R01_cb8564_c146700/f2p0/228<br>4 | R01_cb8564_c146700/f2p0/228<br>4 | R01_cb8564_c146700/f2p0/228<br>4 |
| R01_cb10775_c0/f1p0/1207         | NA                               | NA                               | R01_cb10775_c0/f1p0/1207         | R01_cb10775_c0/f1p0/1207         |
| R01_cb18456_c7268/f1p4/809       | NA                               | R01_cb18456_c7268/f1p4/809       | NA                               | NA                               |
| R01_cb8564_c2801/f1p0/2143       | NA                               | R01_cb8564_c2801/f1p0/2143       | NA                               | NA                               |
| R01_cb18624_c1/f1p0/4718         | NA                               | R01_cb18624_c1/f1p0/4718         | NA                               | NA                               |
| R01_cb14217_c5/f2p0/775          | NA                               | NA                               | NA                               | R01_cb14217_c5/f2p0/775          |
| R01_cb4361_c1/f1p0/2264          | NA                               | R01_cb4361_c1/f1p0/2264          | R01_cb4361_c1/f1p0/2264          | R01_cb4361_c1/f1p0/2264          |
| R01_cb13428_c6/f1p0/797          | NA                               | R01_cb13428_c6/f1p0/797          | NA                               | NA                               |
| R01_cb9856_c4/f1p0/1148          | NA                               | R01_cb9856_c4/f1p0/1148          | NA                               | NA                               |
| R01_cb17627_c1/f1p0/474          | R01_cb17627_c1/f1p0/474          | R01_cb17627_c1/f1p0/474          | R01_cb17627_c1/f1p0/474          | R01_cb17627_c1/f1p0/474          |
| R01_cb8564_c119075/f1p0/255<br>4 | NA                               | R01_cb8564_c119075/f1p0/255<br>4 | NA                               | R01_cb8564_c119075/f1p0/255<br>4 |
| R01_cb8564_c82675/f1p0/2204      | NA                               | R01_cb8564_c82675/f1p0/2204      | R01_cb8564_c82675/f1p0/2204      | R01_cb8564_c82675/f1p0/2204      |

|                                  |                            |                                  |                                  |                                  |
|----------------------------------|----------------------------|----------------------------------|----------------------------------|----------------------------------|
| R01_cb8564_c128785/flp0/293<br>1 | NA                         | R01_cb8564_c128785/flp0/293<br>1 | R01_cb8564_c128785/flp0/293<br>1 | R01_cb8564_c128785/flp0/293<br>1 |
| R01_cb1758_c0/f3p1/2141          | NA                         | NA                               | NA                               | R01_cb1758_c0/f3p1/2141          |
| R01_cb8564_c22247/flp0/4265      | NA                         | NA                               | NA                               | R01_cb8564_c22247/flp0/4265      |
| R01_cb13862_c3/flp0/1839         | NA                         | R01_cb13862_c3/flp0/1839         | R01_cb13862_c3/flp0/1839         | R01_cb13862_c3/flp0/1839         |
| R01_cb8564_c39296/flp0/2315      | NA                         | NA                               | R01_cb8564_c39296/flp0/2315      | R01_cb8564_c39296/flp0/2315      |
| R01_cb8564_c37939/flp0/4573      | NA                         | R01_cb8564_c37939/flp0/4573      | NA                               | NA                               |
| R01_cb15572_c5/flp0/1537         | NA                         | R01_cb15572_c5/flp0/1537         | NA                               | NA                               |
| R01_cb8865_c0/flp0/2207          | NA                         | NA                               | NA                               | R01_cb8865_c0/flp0/2207          |
| R01_cb7019_c0/flp0/2710          | NA                         | R01_cb7019_c0/flp0/2710          | R01_cb7019_c0/flp0/2710          | R01_cb7019_c0/flp0/2710          |
| R01_cb18456_c7412/flp0/350       | R01_cb18456_c7412/flp0/350 | R01_cb18456_c7412/flp0/350       | R01_cb18456_c7412/flp0/350       | R01_cb18456_c7412/flp0/350       |
| R01_cb15768_c5/flp0/1848         | NA                         | R01_cb15768_c5/flp0/1848         | NA                               | R01_cb15768_c5/flp0/1848         |
| R01_cb2616_c3/flp0/1293          | NA                         | NA                               | NA                               | R01_cb2616_c3/flp0/1293          |
| R01_cb8882_c0/flp0/2261          | NA                         | R01_cb8882_c0/flp0/2261          | NA                               | NA                               |
| R01_cb15883_c1/flp0/828          | NA                         | R01_cb15883_c1/flp0/828          | NA                               | NA                               |
| R01_cb4001_c2/flp0/3202          | NA                         | NA                               | NA                               | R01_cb4001_c2/flp0/3202          |
| R01_cb16383_c0/f2p0/1838         | NA                         | R01_cb16383_c0/f2p0/1838         | NA                               | R01_cb16383_c0/f2p0/1838         |
| R01_cb525_c3/flp0/4745           | NA                         | NA                               | NA                               | R01_cb525_c3/flp0/4745           |
| R01_cb18014_c1/flp0/913          | NA                         | NA                               | NA                               | R01_cb18014_c1/flp0/913          |
| R01_cb8564_c79841/f2p0/3174      | NA                         | NA                               | NA                               | R01_cb8564_c79841/f2p0/3174      |
| R01_cb7999_c8/flp0/897           | NA                         | NA                               | NA                               | R01_cb7999_c8/flp0/897           |
| R01_cb17973_c30/flp0/588         | R01_cb17973_c30/flp0/588   | R01_cb17973_c30/flp0/588         | R01_cb17973_c30/flp0/588         | NA                               |
| R01_cb5640_c3/flp1/2302          | NA                         | NA                               | NA                               | R01_cb5640_c3/flp1/2302          |
| R01_cb9354_c2/flp0/2020          | NA                         | NA                               | NA                               | R01_cb9354_c2/flp0/2020          |
| R01_cb11566_c4/flp0/420          | R01_cb11566_c4/flp0/420    | R01_cb11566_c4/flp0/420          | R01_cb11566_c4/flp0/420          | R01_cb11566_c4/flp0/420          |
| R01_cb5513_c0/f2p0/2985          | NA                         | NA                               | NA                               | R01_cb5513_c0/f2p0/2985          |

|                              |                            |                              |                            |                            |
|------------------------------|----------------------------|------------------------------|----------------------------|----------------------------|
| R01_cb5593_c2/flp0/2301      | NA                         | R01_cb5593_c2/flp0/2301      | NA                         | NA                         |
| R01_cb6845_c17/flp1/2530     | NA                         | NA                           | NA                         | R01_cb6845_c17/flp1/2530   |
| R01_cb13439_c61/flp1/1069    | R01_cb13439_c61/flp1/1069  | R01_cb13439_c61/flp1/1069    | NA                         | NA                         |
| R01_cb10029_c359/flp0/1037   | NA                         | R01_cb10029_c359/flp0/1037   | NA                         | NA                         |
| R01_cb18456_c7177/flp0/556   | R01_cb18456_c7177/flp0/556 | R01_cb18456_c7177/flp0/556   | R01_cb18456_c7177/flp0/556 | R01_cb18456_c7177/flp0/556 |
| R01_cb16552_c1/flp0/1266     | NA                         | NA                           | NA                         | R01_cb16552_c1/flp0/1266   |
| R01_cb6286_c17/f2p1/2683     | NA                         | NA                           | NA                         | R01_cb6286_c17/f2p1/2683   |
| R01_cb16949_c1/flp0/1799     | NA                         | R01_cb16949_c1/flp0/1799     | NA                         | NA                         |
| R01_cb10681_c2/flp0/1029     | R01_cb10681_c2/flp0/1029   | R01_cb10681_c2/flp0/1029     | NA                         | R01_cb10681_c2/flp0/1029   |
| R01_cb4768_c40/flp1/2478     | NA                         | R01_cb4768_c40/flp1/2478     | NA                         | NA                         |
| R01_cb9201_c7/flp0/2183      | NA                         | NA                           | NA                         | R01_cb9201_c7/flp0/2183    |
| R01_cb8564_c128014/flp0/2813 | NA                         | R01_cb8564_c128014/flp0/2813 | NA                         | NA                         |
| R01_cb9704_c2/flp0/1857      | NA                         | NA                           | NA                         | R01_cb9704_c2/flp0/1857    |
| R01_cb7654_c1/flp0/2566      | NA                         | R01_cb7654_c1/flp0/2566      | NA                         | R01_cb7654_c1/flp0/2566    |
| R01_cb8564_c1324/flp1/2459   | NA                         | NA                           | NA                         | R01_cb8564_c1324/flp1/2459 |
| R01_cb18632_c3/flp0/1136     | NA                         | R01_cb18632_c3/flp0/1136     | NA                         | R01_cb18632_c3/flp0/1136   |
| R01_cb13938_c23/flp0/1164    | NA                         | NA                           | NA                         | R01_cb13938_c23/flp0/1164  |
| R01_cb16833_c9/flp0/6462     | NA                         | R01_cb16833_c9/flp0/6462     | NA                         | NA                         |
| R01_cb10272_c18/flp2/1699    | NA                         | NA                           | NA                         | R01_cb10272_c18/flp2/1699  |
| R01_cb16248_c0/f2p2/567      | NA                         | R01_cb16248_c0/f2p2/567      | NA                         | NA                         |
| R01_cb4368_c1/f9p1/1403      | NA                         | NA                           | NA                         | R01_cb4368_c1/f9p1/1403    |
| R01_cb4555_c1/flp0/3308      | NA                         | R01_cb4555_c1/flp0/3308      | NA                         | R01_cb4555_c1/flp0/3308    |
| R01_cb15606_c2/flp0/993      | NA                         | NA                           | NA                         | R01_cb15606_c2/flp0/993    |
| R01_cb15982_c2/flp0/869      | NA                         | R01_cb15982_c2/flp0/869      | NA                         | R01_cb15982_c2/flp0/869    |
| R01_cb5987_c2/flp0/1938      | NA                         | NA                           | NA                         | R01_cb5987_c2/flp0/1938    |

|                              |                              |                              |                              |                             |
|------------------------------|------------------------------|------------------------------|------------------------------|-----------------------------|
| R01_cb13259_c3/f1p0/1611     | NA                           | R01_cb13259_c3/f1p0/1611     | NA                           | NA                          |
| R01_cb822_c6/f2p3/4553       | NA                           | NA                           | NA                           | R01_cb822_c6/f2p3/4553      |
| R01_cb8564_c161493/f1p2/2096 | NA                           | R01_cb8564_c161493/f1p2/2096 | NA                           | NA                          |
| R01_cb16085_c0/f2p0/1547     | NA                           | R01_cb16085_c0/f2p0/1547     | R01_cb16085_c0/f2p0/1547     | R01_cb16085_c0/f2p0/1547    |
| R01_cb8564_c73731/f2p0/4847  | NA                           | R01_cb8564_c73731/f2p0/4847  | NA                           | R01_cb8564_c73731/f2p0/4847 |
| R01_cb16655_c5/f1p0/1468     | NA                           | R01_cb16655_c5/f1p0/1468     | R01_cb16655_c5/f1p0/1468     | R01_cb16655_c5/f1p0/1468    |
| R01_cb10392_c3/f1p0/748      | NA                           | R01_cb10392_c3/f1p0/748      | NA                           | NA                          |
| R01_cb18456_c2496/f1p0/1862  | NA                           | R01_cb18456_c2496/f1p0/1862  | NA                           | R01_cb18456_c2496/f1p0/1862 |
| R01_cb3337_c3/f1p0/3629      | NA                           | R01_cb3337_c3/f1p0/3629      | NA                           | NA                          |
| R01_cb8564_c17286/f1p0/4865  | NA                           | R01_cb8564_c17286/f1p0/4865  | NA                           | NA                          |
| R01_cb17475_c0/f1p0/463      | R01_cb17475_c0/f1p0/463      | R01_cb17475_c0/f1p0/463      | R01_cb17475_c0/f1p0/463      | R01_cb17475_c0/f1p0/463     |
| R01_cb17043_c1/f1p0/999      | NA                           | NA                           | NA                           | R01_cb17043_c1/f1p0/999     |
| R01_cb3001_c3/f1p0/3303      | NA                           | R01_cb3001_c3/f1p0/3303      | NA                           | R01_cb3001_c3/f1p0/3303     |
| R01_cb11352_c0/f3p0/509      | NA                           | R01_cb11352_c0/f3p0/509      | NA                           | NA                          |
| R01_cb6553_c4/f1p0/3048      | NA                           | R01_cb6553_c4/f1p0/3048      | NA                           | R01_cb6553_c4/f1p0/3048     |
| R01_cb1569_c2/f2p0/755       | R01_cb1569_c2/f2p0/755       | R01_cb1569_c2/f2p0/755       | NA                           | NA                          |
| R01_cb5853_c2/f1p1/2472      | R01_cb5853_c2/f1p1/2472      | R01_cb5853_c2/f1p1/2472      | R01_cb5853_c2/f1p1/2472      | NA                          |
| R01_cb8564_c120577/f1p0/2300 | R01_cb8564_c120577/f1p0/2300 | R01_cb8564_c120577/f1p0/2300 | R01_cb8564_c120577/f1p0/2300 | NA                          |
| R01_cb18456_c7831/f5p0/560   | NA                           | R01_cb18456_c7831/f5p0/560   | R01_cb18456_c7831/f5p0/560   | R01_cb18456_c7831/f5p0/560  |
| R01_cb684_c0/f1p0/4683       | NA                           | NA                           | NA                           | R01_cb684_c0/f1p0/4683      |
| R01_cb8564_c85950/f1p0/3005  | NA                           | R01_cb8564_c85950/f1p0/3005  | R01_cb8564_c85950/f1p0/3005  | R01_cb8564_c85950/f1p0/3005 |
| R01_cb8564_c118096/f1p0/2820 | NA                           | R01_cb8564_c118096/f1p0/2820 | NA                           | NA                          |
| R01_cb8564_c4688/f1p0/4180   | NA                           | R01_cb8564_c4688/f1p0/4180   | NA                           | R01_cb8564_c4688/f1p0/4180  |

|                             |                             |                             |                             |                             |
|-----------------------------|-----------------------------|-----------------------------|-----------------------------|-----------------------------|
| R01_cb8037_c3/flp0/1939     | NA                          | NA                          | NA                          | R01_cb8037_c3/flp0/1939     |
| R01_cb4180_c2/flp0/4669     | NA                          | NA                          | NA                          | R01_cb4180_c2/flp0/4669     |
| R01_cb18456_c4740/flp1/492  | R01_cb18456_c4740/flp1/492  | NA                          | NA                          | R01_cb18456_c4740/flp1/492  |
| R01_cb8564_c84603/flp0/2080 | NA                          | R01_cb8564_c84603/flp0/2080 | NA                          | NA                          |
| R01_cb5725_c26/flp0/2912    | NA                          | NA                          | NA                          | R01_cb5725_c26/flp0/2912    |
| R01_cb8564_c1447/flp1/2111  | NA                          | R01_cb8564_c1447/flp1/2111  | NA                          | NA                          |
| R01_cb7197_c8/flp0/2460     | NA                          | R01_cb7197_c8/flp0/2460     | NA                          | NA                          |
| R01_cb12912_c9/flp0/1766    | NA                          | R01_cb12912_c9/flp0/1766    | R01_cb12912_c9/flp0/1766    | NA                          |
| R01_cb3791_c3/flp0/2226     | NA                          | NA                          | NA                          | R01_cb3791_c3/flp0/2226     |
| R01_cb8564_c23701/flp0/3521 | NA                          | R01_cb8564_c23701/flp0/3521 | NA                          | NA                          |
| R01_cb14078_c0/f2p0/583     | NA                          | R01_cb14078_c0/f2p0/583     | NA                          | NA                          |
| R01_cb6411_c0/flp0/2865     | NA                          | NA                          | NA                          | R01_cb6411_c0/flp0/2865     |
| R01_cb12302_c42/flp0/379    | R01_cb12302_c42/flp0/379    | R01_cb12302_c42/flp0/379    | R01_cb12302_c42/flp0/379    | R01_cb12302_c42/flp0/379    |
| R01_cb8564_c53807/flp1/2773 | R01_cb8564_c53807/flp1/2773 | R01_cb8564_c53807/flp1/2773 | R01_cb8564_c53807/flp1/2773 | R01_cb8564_c53807/flp1/2773 |
| R01_cb8564_c33756/f5p0/2174 | NA                          | R01_cb8564_c33756/f5p0/2174 | R01_cb8564_c33756/f5p0/2174 | R01_cb8564_c33756/f5p0/2174 |
| R01_cb7814_c1/f3p1/2550     | NA                          | NA                          | NA                          | R01_cb7814_c1/f3p1/2550     |
| R01_cb10458_c2/f2p1/1875    | NA                          | NA                          | NA                          | R01_cb10458_c2/f2p1/1875    |
| R01_cb17715_c4/flp0/1613    | NA                          | NA                          | NA                          | R01_cb17715_c4/flp0/1613    |
| R01_cb16125_c6/flp0/1476    | NA                          | NA                          | NA                          | R01_cb16125_c6/flp0/1476    |
| R01_cb5595_c20/flp0/2290    | R01_cb5595_c20/flp0/2290    | NA                          | R01_cb5595_c20/flp0/2290    | R01_cb5595_c20/flp0/2290    |
| R01_cb4345_c17/flp0/1868    | NA                          | NA                          | NA                          | R01_cb4345_c17/flp0/1868    |
| R01_cb18529_c0/flp0/1784    | NA                          | R01_cb18529_c0/flp0/1784    | NA                          | R01_cb18529_c0/flp0/1784    |
| R01_cb9612_c1/flp0/2025     | NA                          | NA                          | NA                          | R01_cb9612_c1/flp0/2025     |
| R01_cb10024_c695/f8p0/663   | NA                          | NA                          | R01_cb10024_c695/f8p0/663   | NA                          |
| R01_cb4762_c3/flp0/1130     | NA                          | R01_cb4762_c3/flp0/1130     | NA                          | NA                          |

|                              |                           |                              |                              |                              |
|------------------------------|---------------------------|------------------------------|------------------------------|------------------------------|
| R01_cb8295_c1/f6p0/1642      | NA                        | NA                           | NA                           | R01_cb8295_c1/f6p0/1642      |
| R01_cb9916_c2/f1p1/2310      | NA                        | NA                           | NA                           | R01_cb9916_c2/f1p1/2310      |
| R01_cb4514_c1/f3p1/1912      | NA                        | NA                           | NA                           | R01_cb4514_c1/f3p1/1912      |
| R01_cb8564_c119638/f1p0/2467 | NA                        | R01_cb8564_c119638/f1p0/2467 | R01_cb8564_c119638/f1p0/2467 | NA                           |
| R01_cb13875_c1/f4p1/1304     | NA                        | NA                           | NA                           | R01_cb13875_c1/f4p1/1304     |
| R01_cb14502_c16/f1p0/1544    | R01_cb14502_c16/f1p0/1544 | R01_cb14502_c16/f1p0/1544    | NA                           | R01_cb14502_c16/f1p0/1544    |
| R01_cb7797_c4/f1p0/2493      | NA                        | NA                           | NA                           | R01_cb7797_c4/f1p0/2493      |
| R01_cb8564_c69250/f2p0/2678  | NA                        | R01_cb8564_c69250/f2p0/2678  | NA                           | NA                           |
| R01_cb8564_c51027/f1p0/3064  | NA                        | NA                           | R01_cb8564_c51027/f1p0/3064  | R01_cb8564_c51027/f1p0/3064  |
| R01_cb7113_c3/f1p0/1224      | NA                        | NA                           | NA                           | R01_cb7113_c3/f1p0/1224      |
| R01_cb2471_c20/f1p0/3413     | NA                        | R01_cb2471_c20/f1p0/3413     | NA                           | R01_cb2471_c20/f1p0/3413     |
| R01_cb8564_c3993/f1p0/4381   | NA                        | R01_cb8564_c3993/f1p0/4381   | R01_cb8564_c3993/f1p0/4381   | R01_cb8564_c3993/f1p0/4381   |
| R01_cb4609_c5/f1p0/743       | NA                        | NA                           | NA                           | R01_cb4609_c5/f1p0/743       |
| R01_cb9377_c3/f1p0/1645      | NA                        | NA                           | NA                           | R01_cb9377_c3/f1p0/1645      |
| R01_cb8564_c127129/f1p1/2311 | NA                        | NA                           | R01_cb8564_c127129/f1p1/2311 | R01_cb8564_c127129/f1p1/2311 |
| R01_cb5120_c3/f1p0/1716      | NA                        | NA                           | NA                           | R01_cb5120_c3/f1p0/1716      |
| R01_cb2925_c1/f1p0/3769      | NA                        | R01_cb2925_c1/f1p0/3769      | NA                           | NA                           |
| R01_cb7784_c5/f1p1/2103      | NA                        | R01_cb7784_c5/f1p1/2103      | NA                           | NA                           |
| R01_cb8564_c3735/f3p4/2692   | NA                        | NA                           | NA                           | R01_cb8564_c3735/f3p4/2692   |
| R01_cb8564_c89585/f1p0/3611  | NA                        | R01_cb8564_c89585/f1p0/3611  | NA                           | NA                           |
| R01_cb1279_c72/f1p0/2264     | NA                        | R01_cb1279_c72/f1p0/2264     | NA                           | R01_cb1279_c72/f1p0/2264     |
| R01_cb2378_c31/f1p1/3720     | NA                        | NA                           | NA                           | R01_cb2378_c31/f1p1/3720     |
| R01_cb4656_c6/f1p0/1966      | NA                        | R01_cb4656_c6/f1p0/1966      | NA                           | NA                           |
| R01_cb2204_c1/f1p0/4012      | R01_cb2204_c1/f1p0/4012   | R01_cb2204_c1/f1p0/4012      | R01_cb2204_c1/f1p0/4012      | R01_cb2204_c1/f1p0/4012      |

|                             |                            |                             |                             |                             |
|-----------------------------|----------------------------|-----------------------------|-----------------------------|-----------------------------|
| R01_cb6480_c3/flp1/2681     | NA                         | NA                          | NA                          | R01_cb6480_c3/flp1/2681     |
| R01_cb1437_c12/flp0/2951    | NA                         | NA                          | NA                          | R01_cb1437_c12/flp0/2951    |
| R01_cb9646_c6/flp0/1128     | NA                         | NA                          | NA                          | R01_cb9646_c6/flp0/1128     |
| R01_cb17756_c16/flp0/478    | R01_cb17756_c16/flp0/478   | R01_cb17756_c16/flp0/478    | R01_cb17756_c16/flp0/478    | R01_cb17756_c16/flp0/478    |
| R01_cb8564_c69884/flp1/2650 | NA                         | R01_cb8564_c69884/flp1/2650 | R01_cb8564_c69884/flp1/2650 | R01_cb8564_c69884/flp1/2650 |
| R01_cb7584_c7/flp0/2579     | R01_cb7584_c7/flp0/2579    | R01_cb7584_c7/flp0/2579     | NA                          | NA                          |
| R01_cb5524_c3/flp0/2077     | NA                         | R01_cb5524_c3/flp0/2077     | NA                          | NA                          |
| R01_cb18409_c67/flp0/809    | R01_cb18409_c67/flp0/809   | R01_cb18409_c67/flp0/809    | R01_cb18409_c67/flp0/809    | R01_cb18409_c67/flp0/809    |
| R01_cb9812_c2/flp0/3208     | NA                         | NA                          | NA                          | R01_cb9812_c2/flp0/3208     |
| R01_cb8564_c68701/f5p0/2447 | NA                         | NA                          | R01_cb8564_c68701/f5p0/2447 | R01_cb8564_c68701/f5p0/2447 |
| R01_cb849_c7/flp0/2513      | NA                         | R01_cb849_c7/flp0/2513      | NA                          | NA                          |
| R01_cb8564_c23581/flp0/3057 | NA                         | R01_cb8564_c23581/flp0/3057 | NA                          | R01_cb8564_c23581/flp0/3057 |
| R01_cb18456_c207/flp4/978   | NA                         | R01_cb18456_c207/flp4/978   | NA                          | NA                          |
| R01_cb10075_c41/flp0/1031   | NA                         | NA                          | NA                          | R01_cb10075_c41/flp0/1031   |
| R01_cb8564_c17408/f3p0/2782 | NA                         | R01_cb8564_c17408/f3p0/2782 | NA                          | R01_cb8564_c17408/f3p0/2782 |
| R01_cb18456_c4759/flp1/489  | R01_cb18456_c4759/flp1/489 | NA                          | NA                          | R01_cb18456_c4759/flp1/489  |
| R01_cb5516_c58/flp0/3485    | NA                         | R01_cb5516_c58/flp0/3485    | NA                          | R01_cb5516_c58/flp0/3485    |
| R01_cb17791_c0/flp0/1378    | NA                         | NA                          | NA                          | R01_cb17791_c0/flp0/1378    |
| R01_cb9043_c6/flp0/1371     | NA                         | R01_cb9043_c6/flp0/1371     | NA                          | R01_cb9043_c6/flp0/1371     |
| R01_cb416_c32/flp0/2621     | NA                         | NA                          | NA                          | R01_cb416_c32/flp0/2621     |
| R01_cb7698_c0/flp0/2542     | NA                         | R01_cb7698_c0/flp0/2542     | NA                          | NA                          |
| R01_cb12421_c0/f99p5/674    | NA                         | R01_cb12421_c0/f99p5/674    | NA                          | NA                          |
| R01_cb9143_c23/f4p0/2041    | NA                         | R01_cb9143_c23/f4p0/2041    | NA                          | NA                          |
| R01_cb13938_c14/flp0/1325   | NA                         | NA                          | NA                          | R01_cb13938_c14/flp0/1325   |
| R01_cb17668_c3/flp0/710     | NA                         | NA                          | NA                          | R01_cb17668_c3/flp0/710     |
| R01_cb8180_c1/flp0/3811     | NA                         | R01_cb8180_c1/flp0/3811     | NA                          | NA                          |

|                                  |                            |                                  |                                  |                                  |
|----------------------------------|----------------------------|----------------------------------|----------------------------------|----------------------------------|
| R01_cb8564_c125323/flp0/419<br>1 | NA                         | NA                               | R01_cb8564_c125323/flp0/419<br>1 | R01_cb8564_c125323/flp0/419<br>1 |
| R01_cb2156_c24/flp1/2545         | NA                         | R01_cb2156_c24/flp1/2545         | NA                               | NA                               |
| R01_cb12329_c5/f2p0/1609         | NA                         | NA                               | NA                               | R01_cb12329_c5/f2p0/1609         |
| R01_cb8564_c42301/flp0/3750      | NA                         | R01_cb8564_c42301/flp0/3750      | R01_cb8564_c42301/flp0/3750      | NA                               |
| R01_cb18409_c84/flp0/547         | R01_cb18409_c84/flp0/547   | R01_cb18409_c84/flp0/547         | R01_cb18409_c84/flp0/547         | R01_cb18409_c84/flp0/547         |
| R01_cb9648_c13/flp0/1753         | NA                         | R01_cb9648_c13/flp0/1753         | NA                               | NA                               |
| R01_cb11147_c2/flp0/2053         | NA                         | R01_cb11147_c2/flp0/2053         | NA                               | R01_cb11147_c2/flp0/2053         |
| R01_cb17314_c1/flp0/1206         | R01_cb17314_c1/flp0/1206   | R01_cb17314_c1/flp0/1206         | R01_cb17314_c1/flp0/1206         | R01_cb17314_c1/flp0/1206         |
| R01_cb12399_c1/f3p0/435          | NA                         | R01_cb12399_c1/f3p0/435          | R01_cb12399_c1/f3p0/435          | NA                               |
| R01_cb2497_c7/flp0/2495          | NA                         | NA                               | NA                               | R01_cb2497_c7/flp0/2495          |
| R01_cb15346_c4/flp1/778          | NA                         | NA                               | R01_cb15346_c4/flp1/778          | R01_cb15346_c4/flp1/778          |
| R01_cb2806_c3/flp0/3653          | NA                         | NA                               | NA                               | R01_cb2806_c3/flp0/3653          |
| R01_cb15448_c1/flp0/377          | R01_cb15448_c1/flp0/377    | R01_cb15448_c1/flp0/377          | NA                               | R01_cb15448_c1/flp0/377          |
| R01_cb16248_c1/flp1/613          | NA                         | R01_cb16248_c1/flp1/613          | NA                               | NA                               |
| R01_cb10483_c0/flp0/1385         | NA                         | NA                               | NA                               | R01_cb10483_c0/flp0/1385         |
| R01_cb10254_c2/flp0/498          | R01_cb10254_c2/flp0/498    | R01_cb10254_c2/flp0/498          | R01_cb10254_c2/flp0/498          | R01_cb10254_c2/flp0/498          |
| R01_cb15922_c1/flp0/1880         | NA                         | R01_cb15922_c1/flp0/1880         | R01_cb15922_c1/flp0/1880         | R01_cb15922_c1/flp0/1880         |
| R01_cb11354_c5/flp0/5247         | NA                         | NA                               | NA                               | R01_cb11354_c5/flp0/5247         |
| R01_cb10506_c9/flp0/1490         | NA                         | R01_cb10506_c9/flp0/1490         | NA                               | NA                               |
| R01_cb11068_c1/flp0/2816         | NA                         | NA                               | NA                               | R01_cb11068_c1/flp0/2816         |
| R01_cb5449_c19/flp0/2626         | NA                         | R01_cb5449_c19/flp0/2626         | NA                               | NA                               |
| R01_cb8564_c125927/flp0/247<br>7 | NA                         | R01_cb8564_c125927/flp0/247<br>7 | R01_cb8564_c125927/flp0/247<br>7 | R01_cb8564_c125927/flp0/247<br>7 |
| R01_cb9049_c2/flp0/2201          | NA                         | R01_cb9049_c2/flp0/2201          | NA                               | R01_cb9049_c2/flp0/2201          |
| R01_cb8564_c84844/flp0/1945      | R01_cb8564_c84844/flp0/194 | R01_cb8564_c84844/flp0/1945      | NA                               | R01_cb8564_c84844/flp0/1945      |



---

|                             |                           |                             |                            |                             |
|-----------------------------|---------------------------|-----------------------------|----------------------------|-----------------------------|
|                             | 5                         |                             |                            |                             |
| R01_cb9225_c1/flp0/2148     | NA                        | R01_cb9225_c1/flp0/2148     | NA                         | NA                          |
| R01_cb5790_c4/flp0/1051     | NA                        | NA                          | NA                         | R01_cb5790_c4/flp0/1051     |
| R01_cb8564_c4098/flp0/3713  | NA                        | R01_cb8564_c4098/flp0/3713  | R01_cb8564_c4098/flp0/3713 | NA                          |
| R01_cb3575_c21/flp0/2927    | NA                        | NA                          | NA                         | R01_cb3575_c21/flp0/2927    |
| R01_cb2367_c2/flp0/2706     | NA                        | R01_cb2367_c2/flp0/2706     | R01_cb2367_c2/flp0/2706    | NA                          |
| R01_cb12093_c3/flp0/434     | NA                        | R01_cb12093_c3/flp0/434     | NA                         | NA                          |
| R01_cb8564_c2542/flp0/2705  | NA                        | R01_cb8564_c2542/flp0/2705  | NA                         | NA                          |
| R01_cb12079_c9/flp0/642     | NA                        | R01_cb12079_c9/flp0/642     | NA                         | R01_cb12079_c9/flp0/642     |
| R01_cb8564_c73607/flp0/2892 | NA                        | R01_cb8564_c73607/flp0/2892 | NA                         | R01_cb8564_c73607/flp0/2892 |
| R01_cb1839_c3/flp0/4333     | NA                        | NA                          | NA                         | R01_cb1839_c3/flp0/4333     |
| R01_cb15396_c0/flp0/1842    | NA                        | R01_cb15396_c0/flp0/1842    | NA                         | NA                          |
| R01_cb2765_c8/flp0/2925     | NA                        | R01_cb2765_c8/flp0/2925     | NA                         | R01_cb2765_c8/flp0/2925     |
| R01_cb9550_c6/flp0/1996     | NA                        | R01_cb9550_c6/flp0/1996     | NA                         | NA                          |
| R01_cb13408_c4/flp0/521     | R01_cb13408_c4/flp0/521   | R01_cb13408_c4/flp0/521     | R01_cb13408_c4/flp0/521    | R01_cb13408_c4/flp0/521     |
| R01_cb3228_c2/flp0/3680     | NA                        | R01_cb3228_c2/flp0/3680     | NA                         | NA                          |
| R01_cb8564_c1412/flp0/2246  | NA                        | R01_cb8564_c1412/flp0/2246  | NA                         | R01_cb8564_c1412/flp0/2246  |
| R01_cb10310_c1/flp0/1974    | NA                        | NA                          | NA                         | R01_cb10310_c1/flp0/1974    |
| R01_cb16288_c0/f2p0/702     | NA                        | NA                          | NA                         | R01_cb16288_c0/f2p0/702     |
| R01_cb6118_c3/flp0/2779     | NA                        | R01_cb6118_c3/flp0/2779     | NA                         | NA                          |
| R01_cb4915_c6/flp0/2189     | NA                        | R01_cb4915_c6/flp0/2189     | NA                         | NA                          |
| R01_cb18260_c0/flp0/1386    | NA                        | NA                          | NA                         | R01_cb18260_c0/flp0/1386    |
| R01_cb18526_c14/flp0/1392   | R01_cb18526_c14/flp0/1392 | R01_cb18526_c14/flp0/1392   | R01_cb18526_c14/flp0/1392  | R01_cb18526_c14/flp0/1392   |
| R01_cb4030_c4/flp0/2419     | NA                        | NA                          | NA                         | R01_cb4030_c4/flp0/2419     |
| R01_cb3031_c3/flp0/10931    | NA                        | R01_cb3031_c3/flp0/10931    | NA                         | R01_cb3031_c3/flp0/10931    |
| R01_cb16376_c4/flp0/791     | NA                        | R01_cb16376_c4/flp0/791     | NA                         | NA                          |

---

|                             |                             |                             |                             |                             |
|-----------------------------|-----------------------------|-----------------------------|-----------------------------|-----------------------------|
| R01_cb18456_c7795/f6p0/544  | R01_cb18456_c7795/f6p0/544  | R01_cb18456_c7795/f6p0/544  | R01_cb18456_c7795/f6p0/544  | R01_cb18456_c7795/f6p0/544  |
| R01_cb2581_c2/flp0/2882     | NA                          | R01_cb2581_c2/flp0/2882     | R01_cb2581_c2/flp0/2882     | R01_cb2581_c2/flp0/2882     |
| R01_cb8564_c73225/flp0/2221 | R01_cb8564_c73225/flp0/2221 | R01_cb8564_c73225/flp0/2221 | R01_cb8564_c73225/flp0/2221 | R01_cb8564_c73225/flp0/2221 |
| R01_cb18456_c7458/flp0/619  | NA                          | NA                          | R01_cb18456_c7458/flp0/619  | R01_cb18456_c7458/flp0/619  |
| R01_cb8564_c23528/flp0/4715 | NA                          | R01_cb8564_c23528/flp0/4715 | NA                          | NA                          |
| R01_cb13044_c1/f2p0/629     | NA                          | R01_cb13044_c1/f2p0/629     | NA                          | NA                          |
| R01_cb6365_c5/flp1/2516     | NA                          | R01_cb6365_c5/flp1/2516     | NA                          | NA                          |
| R01_cb4352_c13/flp0/2355    | NA                          | NA                          | NA                          | R01_cb4352_c13/flp0/2355    |
| R01_cb18182_c1/flp0/1264    | NA                          | NA                          | NA                          | R01_cb18182_c1/flp0/1264    |
| R01_cb4604_c21/flp0/3095    | R01_cb4604_c21/flp0/3095    | R01_cb4604_c21/flp0/3095    | R01_cb4604_c21/flp0/3095    | R01_cb4604_c21/flp0/3095    |
| R01_cb9859_c3/flp0/1042     | NA                          | NA                          | NA                          | R01_cb9859_c3/flp0/1042     |
| R01_cb4490_c5/flp0/2738     | NA                          | NA                          | NA                          | R01_cb4490_c5/flp0/2738     |
| R01_cb8564_c80017/flp0/4204 | NA                          | NA                          | NA                          | R01_cb8564_c80017/flp0/4204 |
| R01_cb12896_c3/flp0/1086    | R01_cb12896_c3/flp0/1086    | R01_cb12896_c3/flp0/1086    | R01_cb12896_c3/flp0/1086    | R01_cb12896_c3/flp0/1086    |
| R01_cb3046_c4/flp1/3736     | NA                          | R01_cb3046_c4/flp1/3736     | NA                          | R01_cb3046_c4/flp1/3736     |
| R01_cb2101_c3/flp0/4051     | NA                          | R01_cb2101_c3/flp0/4051     | NA                          | NA                          |
| R01_cb14125_c49/flp0/477    | R01_cb14125_c49/flp0/477    | R01_cb14125_c49/flp0/477    | R01_cb14125_c49/flp0/477    | NA                          |
| R01_cb1915_c11/flp0/2308    | NA                          | R01_cb1915_c11/flp0/2308    | NA                          | NA                          |
| R01_cb8564_c4907/flp0/2588  | NA                          | R01_cb8564_c4907/flp0/2588  | NA                          | R01_cb8564_c4907/flp0/2588  |
| R01_cb11184_c2/flp0/2351    | R01_cb11184_c2/flp0/2351    | R01_cb11184_c2/flp0/2351    | NA                          | NA                          |
| R01_cb8564_c36257/flp0/4640 | NA                          | NA                          | NA                          | R01_cb8564_c36257/flp0/4640 |
| R01_cb16929_c0/f2p0/491     | NA                          | NA                          | NA                          | R01_cb16929_c0/f2p0/491     |
| R01_cb6861_c21/flp0/1681    | R01_cb6861_c21/flp0/1681    | R01_cb6861_c21/flp0/1681    | NA                          | R01_cb6861_c21/flp0/1681    |
| R01_cb11254_c6/flp0/1763    | NA                          | NA                          | NA                          | R01_cb11254_c6/flp0/1763    |
| R01_cb8564_c12406/flp0/3337 | NA                          | R01_cb8564_c12406/flp0/3337 | R01_cb8564_c12406/flp0/3337 | R01_cb8564_c12406/flp0/3337 |

|                              |                             |                              |                             |                             |
|------------------------------|-----------------------------|------------------------------|-----------------------------|-----------------------------|
| R01_cb8564_c4216/flp0/3677   | NA                          | NA                           | R01_cb8564_c4216/flp0/3677  | R01_cb8564_c4216/flp0/3677  |
| R01_cb6163_c18/flp0/1078     | NA                          | R01_cb6163_c18/flp0/1078     | NA                          | NA                          |
| R01_cb8564_c86398/flp0/2019  | NA                          | R01_cb8564_c86398/flp0/2019  | R01_cb8564_c86398/flp0/2019 | R01_cb8564_c86398/flp0/2019 |
| R01_cb10787_c0/f2p0/1172     | NA                          | NA                           | NA                          | R01_cb10787_c0/f2p0/1172    |
| R01_cb12714_c37/flp0/308     | R01_cb12714_c37/flp0/308    | R01_cb12714_c37/flp0/308     | R01_cb12714_c37/flp0/308    | R01_cb12714_c37/flp0/308    |
| R01_cb4715_c2/flp0/2552      | NA                          | NA                           | R01_cb4715_c2/flp0/2552     | R01_cb4715_c2/flp0/2552     |
| R01_cb8564_c121351/flp0/3350 | NA                          | R01_cb8564_c121351/flp0/3350 | NA                          | NA                          |
| R01_cb1203_c19/flp0/2824     | NA                          | NA                           | NA                          | R01_cb1203_c19/flp0/2824    |
| R01_cb8564_c14886/flp1/3641  | NA                          | NA                           | NA                          | R01_cb8564_c14886/flp1/3641 |
| R01_cb13177_c8/flp0/1612     | NA                          | NA                           | NA                          | R01_cb13177_c8/flp0/1612    |
| R01_cb8564_c89691/flp0/3554  | R01_cb8564_c89691/flp0/3554 | R01_cb8564_c89691/flp0/3554  | R01_cb8564_c89691/flp0/3554 | R01_cb8564_c89691/flp0/3554 |
| R01_cb1301_c5/flp0/2947      | NA                          | NA                           | NA                          | R01_cb1301_c5/flp0/2947     |
| R01_cb8564_c10166/flp0/2336  | NA                          | R01_cb8564_c10166/flp0/2336  | NA                          | NA                          |
| R01_cb18238_c0/f2p0/529      | NA                          | R01_cb18238_c0/f2p0/529      | R01_cb18238_c0/f2p0/529     | R01_cb18238_c0/f2p0/529     |
| R01_cb5156_c3/f2p2/627       | NA                          | R01_cb5156_c3/f2p2/627       | NA                          | R01_cb5156_c3/f2p2/627      |
| R01_cb4800_c2/flp0/3257      | NA                          | R01_cb4800_c2/flp0/3257      | NA                          | NA                          |
| R01_cb8187_c1/flp0/2033      | R01_cb8187_c1/flp0/2033     | R01_cb8187_c1/flp0/2033      | R01_cb8187_c1/flp0/2033     | R01_cb8187_c1/flp0/2033     |
| R01_cb4973_c14/flp0/444      | R01_cb4973_c14/flp0/444     | R01_cb4973_c14/flp0/444      | R01_cb4973_c14/flp0/444     | R01_cb4973_c14/flp0/444     |
| R01_cb1228_c9/f3p0/2548      | NA                          | NA                           | NA                          | R01_cb1228_c9/f3p0/2548     |
| R01_cb5554_c3/flp0/2720      | NA                          | R01_cb5554_c3/flp0/2720      | NA                          | NA                          |
| R01_cb18604_c1/flp0/455      | NA                          | R01_cb18604_c1/flp0/455      | NA                          | R01_cb18604_c1/flp0/455     |
| R01_cb16984_c2/flp0/1256     | NA                          | NA                           | NA                          | R01_cb16984_c2/flp0/1256    |
| R01_cb15379_c1/flp0/1771     | NA                          | NA                           | R01_cb15379_c1/flp0/1771    | R01_cb15379_c1/flp0/1771    |
| R01_cb11196_c1/flp0/3451     | NA                          | R01_cb11196_c1/flp0/3451     | NA                          | NA                          |

|                             |                            |                             |                             |                             |
|-----------------------------|----------------------------|-----------------------------|-----------------------------|-----------------------------|
| R01_cb8564_c80717/flp1/2766 | NA                         | R01_cb8564_c80717/flp1/2766 | R01_cb8564_c80717/flp1/2766 | NA                          |
| R01_cb14292_c12/flp0/1656   | NA                         | R01_cb14292_c12/flp0/1656   | NA                          | NA                          |
| R01_cb14613_c0/flp2/596     | NA                         | NA                          | NA                          | R01_cb14613_c0/flp2/596     |
| R01_cb8564_c14841/flp0/3290 | NA                         | R01_cb8564_c14841/flp0/3290 | R01_cb8564_c14841/flp0/3290 | R01_cb8564_c14841/flp0/3290 |
| R01_cb7612_c2/flp1/2003     | NA                         | NA                          | NA                          | R01_cb7612_c2/flp1/2003     |
| R01_cb11055_c1/flp0/2751    | NA                         | R01_cb11055_c1/flp0/2751    | NA                          | NA                          |
| R01_cb8564_c24875/flp0/3485 | NA                         | NA                          | NA                          | R01_cb8564_c24875/flp0/3485 |
| R01_cb10741_c1/flp0/1891    | R01_cb10741_c1/flp0/1891   | R01_cb10741_c1/flp0/1891    | R01_cb10741_c1/flp0/1891    | NA                          |
| R01_cb17302_c2/flp0/711     | NA                         | R01_cb17302_c2/flp0/711     | NA                          | R01_cb17302_c2/flp0/711     |
| R01_cb18456_c7093/flp0/442  | R01_cb18456_c7093/flp0/442 | R01_cb18456_c7093/flp0/442  | R01_cb18456_c7093/flp0/442  | R01_cb18456_c7093/flp0/442  |
| R01_cb5847_c5/flp0/2404     | NA                         | NA                          | NA                          | R01_cb5847_c5/flp0/2404     |
| R01_cb8023_c6/flp0/2383     | NA                         | R01_cb8023_c6/flp0/2383     | NA                          | NA                          |
| R01_cb15186_c14/flp0/562    | R01_cb15186_c14/flp0/562   | R01_cb15186_c14/flp0/562    | R01_cb15186_c14/flp0/562    | NA                          |
| R01_cb1259_c13/flp1/3391    | NA                         | NA                          | NA                          | R01_cb1259_c13/flp1/3391    |
| R01_cb8564_c49756/flp0/4302 | NA                         | NA                          | NA                          | R01_cb8564_c49756/flp0/4302 |
| R01_cb17761_c3/flp0/778     | NA                         | NA                          | NA                          | R01_cb17761_c3/flp0/778     |
| R01_cb5100_c0/flp0/3168     | NA                         | R01_cb5100_c0/flp0/3168     | R01_cb5100_c0/flp0/3168     | NA                          |
| R01_cb18456_c843/flp1/795   | NA                         | R01_cb18456_c843/flp1/795   | NA                          | NA                          |
| R01_cb18456_c4055/flp0/1156 | NA                         | R01_cb18456_c4055/flp0/1156 | NA                          | NA                          |
| R01_cb438_c10/flp0/1811     | NA                         | R01_cb438_c10/flp0/1811     | NA                          | R01_cb438_c10/flp0/1811     |
| R01_cb18044_c0/flp0/828     | R01_cb18044_c0/flp0/828    | R01_cb18044_c0/flp0/828     | R01_cb18044_c0/flp0/828     | R01_cb18044_c0/flp0/828     |
| R01_cb8564_c20131/flp1/3881 | NA                         | NA                          | NA                          | R01_cb8564_c20131/flp1/3881 |
| R01_cb781_c16/flp0/1990     | NA                         | NA                          | NA                          | R01_cb781_c16/flp0/1990     |
| R01_cb18456_c7668/flp0/470  | NA                         | NA                          | NA                          | R01_cb18456_c7668/flp0/470  |
| R01_cb8564_c4928/f2p0/2999  | NA                         | NA                          | NA                          | R01_cb8564_c4928/f2p0/2999  |
| R01_cb3601_c26/flp0/968     | NA                         | R01_cb3601_c26/flp0/968     | NA                          | NA                          |

|                              |                          |                             |                            |                              |
|------------------------------|--------------------------|-----------------------------|----------------------------|------------------------------|
| R01_cb18192_c7/flp0/541      | R01_cb18192_c7/flp0/541  | R01_cb18192_c7/flp0/541     | R01_cb18192_c7/flp0/541    | R01_cb18192_c7/flp0/541      |
| R01_cb8564_c22854/flp0/3435  | NA                       | R01_cb8564_c22854/flp0/3435 | NA                         | R01_cb8564_c22854/flp0/3435  |
| R01_cb18456_c6650/flp0/664   | NA                       | NA                          | R01_cb18456_c6650/flp0/664 | R01_cb18456_c6650/flp0/664   |
| R01_cb8564_c2851/f2p0/2612   | NA                       | NA                          | NA                         | R01_cb8564_c2851/f2p0/2612   |
| R01_cb8564_c78756/flp0/2985  | NA                       | R01_cb8564_c78756/flp0/2985 | NA                         | NA                           |
| R01_cb7168_c17/flp0/3074     | NA                       | R01_cb7168_c17/flp0/3074    | NA                         | R01_cb7168_c17/flp0/3074     |
| R01_cb15796_c2/f2p0/1511     | NA                       | NA                          | NA                         | R01_cb15796_c2/f2p0/1511     |
| R01_cb10504_c0/fl1p0/521     | R01_cb10504_c0/fl1p0/521 | R01_cb10504_c0/fl1p0/521    | NA                         | R01_cb10504_c0/fl1p0/521     |
| R01_cb16645_c59/flp0/1411    | NA                       | R01_cb16645_c59/flp0/1411   | R01_cb16645_c59/flp0/1411  | R01_cb16645_c59/flp0/1411    |
| R01_cb9116_c7/flp0/2169      | R01_cb9116_c7/flp0/2169  | NA                          | NA                         | NA                           |
| R01_cb489_c2/flp0/2009       | NA                       | R01_cb489_c2/flp0/2009      | NA                         | NA                           |
| R01_cb3732_c23/flp0/2519     | NA                       | NA                          | NA                         | R01_cb3732_c23/flp0/2519     |
| R01_cb17266_c24/flp0/608     | R01_cb17266_c24/flp0/608 | R01_cb17266_c24/flp0/608    | R01_cb17266_c24/flp0/608   | R01_cb17266_c24/flp0/608     |
| R01_cb13489_c7/flp0/1342     | NA                       | R01_cb13489_c7/flp0/1342    | NA                         | NA                           |
| R01_cb8564_c123657/flp0/1999 | NA                       | NA                          | NA                         | R01_cb8564_c123657/flp0/1999 |
| R01_cb8564_c21727/flp0/3130  | NA                       | NA                          | NA                         | R01_cb8564_c21727/flp0/3130  |
| R01_cb18456_c3441/flp0/1135  | NA                       | R01_cb18456_c3441/flp0/1135 | NA                         | NA                           |
| R01_cb13252_c4/flp0/586      | R01_cb13252_c4/flp0/586  | R01_cb13252_c4/flp0/586     | NA                         | NA                           |
| R01_cb13169_c1/flp0/725      | R01_cb13169_c1/flp0/725  | R01_cb13169_c1/flp0/725     | R01_cb13169_c1/flp0/725    | R01_cb13169_c1/flp0/725      |
| R01_cb7502_c8/flp0/2419      | NA                       | NA                          | R01_cb7502_c8/flp0/2419    | R01_cb7502_c8/flp0/2419      |
| R01_cb18054_c3/flp0/5284     | NA                       | R01_cb18054_c3/flp0/5284    | NA                         | NA                           |
| R01_cb17019_c1/flp0/1070     | NA                       | NA                          | NA                         | R01_cb17019_c1/flp0/1070     |
| R01_cb11022_c0/flp0/1052     | NA                       | R01_cb11022_c0/flp0/1052    | R01_cb11022_c0/flp0/1052   | R01_cb11022_c0/flp0/1052     |
| R01_cb7096_c20/flp0/2641     | NA                       | NA                          | NA                         | R01_cb7096_c20/flp0/2641     |
| R01_cb16304_c1/flp0/1546     | NA                       | NA                          | NA                         | R01_cb16304_c1/flp0/1546     |

|                             |                             |                             |                             |                             |
|-----------------------------|-----------------------------|-----------------------------|-----------------------------|-----------------------------|
| R01_cb4768_c24/flp1/2479    | NA                          | R01_cb4768_c24/flp1/2479    | NA                          | NA                          |
| R01_cb12512_c16/flp0/1365   | NA                          | R01_cb12512_c16/flp0/1365   | R01_cb12512_c16/flp0/1365   | R01_cb12512_c16/flp0/1365   |
| R01_cb8985_c7/flp0/960      | NA                          | R01_cb8985_c7/flp0/960      | NA                          | NA                          |
| R01_cb8564_c9880/f2p0/3052  | NA                          | R01_cb8564_c9880/f2p0/3052  | NA                          | R01_cb8564_c9880/f2p0/3052  |
| R01_cb1686_c12/flp0/1251    | R01_cb1686_c12/flp0/1251    | R01_cb1686_c12/flp0/1251    | R01_cb1686_c12/flp0/1251    | R01_cb1686_c12/flp0/1251    |
| R01_cb3256_c3/flp0/3065     | NA                          | R01_cb3256_c3/flp0/3065     | NA                          | NA                          |
| R01_cb18456_c7995/flp0/560  | NA                          | R01_cb18456_c7995/flp0/560  | R01_cb18456_c7995/flp0/560  | R01_cb18456_c7995/flp0/560  |
| R01_cb17562_c6/f6p0/579     | NA                          | R01_cb17562_c6/f6p0/579     | NA                          | NA                          |
| R01_cb18225_c1/flp0/395     | R01_cb18225_c1/flp0/395     | R01_cb18225_c1/flp0/395     | R01_cb18225_c1/flp0/395     | R01_cb18225_c1/flp0/395     |
| R01_cb7686_c2/flp0/2145     | NA                          | NA                          | NA                          | R01_cb7686_c2/flp0/2145     |
| R01_cb4708_c5/flp0/3255     | NA                          | R01_cb4708_c5/flp0/3255     | NA                          | NA                          |
| R01_cb8564_c12543/flp0/4114 | R01_cb8564_c12543/flp0/4114 | R01_cb8564_c12543/flp0/4114 | R01_cb8564_c12543/flp0/4114 | R01_cb8564_c12543/flp0/4114 |
| R01_cb4819_c3/flp1/2594     | NA                          | R01_cb4819_c3/flp1/2594     | NA                          | NA                          |
| R01_cb11429_c4/flp0/1046    | NA                          | NA                          | NA                          | R01_cb11429_c4/flp0/1046    |
| R01_cb9418_c0/f3p1/1849     | NA                          | NA                          | NA                          | R01_cb9418_c0/f3p1/1849     |
| R01_cb18120_c0/flp0/518     | NA                          | R01_cb18120_c0/flp0/518     | R01_cb18120_c0/flp0/518     | R01_cb18120_c0/flp0/518     |
| R01_cb18249_c1/flp0/718     | NA                          | R01_cb18249_c1/flp0/718     | R01_cb18249_c1/flp0/718     | R01_cb18249_c1/flp0/718     |
| R01_cb14478_c5/flp0/382     | R01_cb14478_c5/flp0/382     | R01_cb14478_c5/flp0/382     | R01_cb14478_c5/flp0/382     | R01_cb14478_c5/flp0/382     |
| R01_cb16076_c4/flp0/727     | NA                          | NA                          | R01_cb16076_c4/flp0/727     | R01_cb16076_c4/flp0/727     |
| R01_cb8564_c11892/flp1/3919 | NA                          | NA                          | NA                          | R01_cb8564_c11892/flp1/3919 |
| R01_cb11353_c2/flp0/2568    | NA                          | R01_cb11353_c2/flp0/2568    | NA                          | R01_cb11353_c2/flp0/2568    |
| R01_cb7663_c1/f2p0/1001     | NA                          | NA                          | NA                          | R01_cb7663_c1/f2p0/1001     |
| R01_cb16019_c3/flp0/946     | NA                          | R01_cb16019_c3/flp0/946     | NA                          | NA                          |
| R01_cb8564_c23069/flp0/2858 | NA                          | NA                          | NA                          | R01_cb8564_c23069/flp0/2858 |
| R01_cb4115_c3/flp0/3785     | NA                          | R01_cb4115_c3/flp0/3785     | R01_cb4115_c3/flp0/3785     | R01_cb4115_c3/flp0/3785     |

|                             |                         |                             |                             |                             |
|-----------------------------|-------------------------|-----------------------------|-----------------------------|-----------------------------|
| R01_cb11692_c1/flp0/2024    | NA                      | NA                          | NA                          | R01_cb11692_c1/flp0/2024    |
| R01_cb8564_c86404/f2p2/3245 | NA                      | NA                          | NA                          | R01_cb8564_c86404/f2p2/3245 |
| R01_cb11938_c9/flp0/884     | NA                      | R01_cb11938_c9/flp0/884     | R01_cb11938_c9/flp0/884     | R01_cb11938_c9/flp0/884     |
| R01_cb4603_c2/flp0/3728     | NA                      | NA                          | NA                          | R01_cb4603_c2/flp0/3728     |
| R01_cb1905_c35/flp0/2423    | NA                      | R01_cb1905_c35/flp0/2423    | R01_cb1905_c35/flp0/2423    | NA                          |
| R01_cb14228_c4/f2p0/714     | NA                      | NA                          | NA                          | R01_cb14228_c4/f2p0/714     |
| R01_cb8564_c24830/flp2/2205 | NA                      | NA                          | NA                          | R01_cb8564_c24830/flp2/2205 |
| R01_cb15695_c0/flp0/789     | R01_cb15695_c0/flp0/789 | R01_cb15695_c0/flp0/789     | R01_cb15695_c0/flp0/789     | R01_cb15695_c0/flp0/789     |
| R01_cb1432_c2/flp0/4443     | NA                      | R01_cb1432_c2/flp0/4443     | NA                          | R01_cb1432_c2/flp0/4443     |
| R01_cb2018_c0/flp0/4091     | NA                      | NA                          | NA                          | R01_cb2018_c0/flp0/4091     |
| R01_cb18456_c7107/flp0/429  | NA                      | R01_cb18456_c7107/flp0/429  | NA                          | NA                          |
| R01_cb69_c35/flp0/3346      | NA                      | NA                          | NA                          | R01_cb69_c35/flp0/3346      |
| R01_cb8564_c82927/flp0/2073 | NA                      | R01_cb8564_c82927/flp0/2073 | R01_cb8564_c82927/flp0/2073 | R01_cb8564_c82927/flp0/2073 |
| R01_cb7538_c14/flp0/391     | R01_cb7538_c14/flp0/391 | R01_cb7538_c14/flp0/391     | NA                          | NA                          |
| R01_cb4911_c1/flp0/3143     | NA                      | R01_cb4911_c1/flp0/3143     | NA                          | NA                          |
| R01_cb3518_c5/flp0/3706     | NA                      | R01_cb3518_c5/flp0/3706     | NA                          | NA                          |
| R01_cb8564_c1484/flp0/3004  | NA                      | R01_cb8564_c1484/flp0/3004  | NA                          | NA                          |
| R01_cb16918_c0/flp0/843     | R01_cb16918_c0/flp0/843 | R01_cb16918_c0/flp0/843     | R01_cb16918_c0/flp0/843     | R01_cb16918_c0/flp0/843     |
| R01_cb146_c4/flp0/3484      | NA                      | NA                          | NA                          | R01_cb146_c4/flp0/3484      |
| R01_cb5234_c8/flp0/3066     | NA                      | NA                          | NA                          | R01_cb5234_c8/flp0/3066     |
| R01_cb5755_c13/flp0/2471    | NA                      | R01_cb5755_c13/flp0/2471    | NA                          | R01_cb5755_c13/flp0/2471    |
| R01_cb15756_c3/flp0/646     | NA                      | NA                          | R01_cb15756_c3/flp0/646     | R01_cb15756_c3/flp0/646     |
| R01_cb4702_c26/flp0/1026    | NA                      | R01_cb4702_c26/flp0/1026    | NA                          | R01_cb4702_c26/flp0/1026    |
| R01_cb11218_c1/flp0/3101    | NA                      | R01_cb11218_c1/flp0/3101    | NA                          | NA                          |
| R01_cb18569_c0/flp0/587     | R01_cb18569_c0/flp0/587 | R01_cb18569_c0/flp0/587     | NA                          | R01_cb18569_c0/flp0/587     |
| R01_cb4074_c7/flp1/2826     | NA                      | R01_cb4074_c7/flp1/2826     | NA                          | NA                          |

|                                  |                         |                                  |                             |                                  |
|----------------------------------|-------------------------|----------------------------------|-----------------------------|----------------------------------|
| R01_cb8564_c119359/f1p0/253<br>2 | NA                      | R01_cb8564_c119359/f1p0/253<br>2 | NA                          | NA                               |
| R01_cb10232_c2/f2p0/669          | NA                      | R01_cb10232_c2/f2p0/669          | NA                          | NA                               |
| R01_cb124_c25/f1p0/3900          | NA                      | NA                               | NA                          | R01_cb124_c25/f1p0/3900          |
| R01_cb18456_c5795/f1p0/611       | NA                      | NA                               | R01_cb18456_c5795/f1p0/611  | NA                               |
| R01_cb14617_c1/f1p0/1491         | NA                      | R01_cb14617_c1/f1p0/1491         | R01_cb14617_c1/f1p0/1491    | R01_cb14617_c1/f1p0/1491         |
| R01_cb7128_c9/f1p0/855           | NA                      | NA                               | NA                          | R01_cb7128_c9/f1p0/855           |
| R01_cb13771_c9/f4p0/1177         | NA                      | R01_cb13771_c9/f4p0/1177         | R01_cb13771_c9/f4p0/1177    | R01_cb13771_c9/f4p0/1177         |
| R01_cb5378_c0/f1p0/3125          | NA                      | NA                               | NA                          | R01_cb5378_c0/f1p0/3125          |
| R01_cb8564_c124838/f1p1/315<br>2 | NA                      | R01_cb8564_c124838/f1p1/315<br>2 | NA                          | NA                               |
| R01_cb6931_c5/f1p0/1796          | NA                      | NA                               | NA                          | R01_cb6931_c5/f1p0/1796          |
| R01_cb423_c5/f1p0/2036           | NA                      | NA                               | NA                          | R01_cb423_c5/f1p0/2036           |
| R01_cb8564_c71473/f1p0/3250      | NA                      | R01_cb8564_c71473/f1p0/3250      | R01_cb8564_c71473/f1p0/3250 | R01_cb8564_c71473/f1p0/3250      |
| R01_cb4248_c1/f1p0/3385          | NA                      | R01_cb4248_c1/f1p0/3385          | NA                          | NA                               |
| R01_cb8564_c88670/f1p0/2846      | NA                      | R01_cb8564_c88670/f1p0/2846      | R01_cb8564_c88670/f1p0/2846 | R01_cb8564_c88670/f1p0/2846      |
| R01_cb4614_c1/f1p0/3298          | NA                      | R01_cb4614_c1/f1p0/3298          | NA                          | NA                               |
| R01_cb2845_c19/f1p0/3016         | NA                      | NA                               | NA                          | R01_cb2845_c19/f1p0/3016         |
| R01_cb7806_c10/f1p0/991          | R01_cb7806_c10/f1p0/991 | R01_cb7806_c10/f1p0/991          | R01_cb7806_c10/f1p0/991     | R01_cb7806_c10/f1p0/991          |
| R01_cb13464_c2/f3p0/437          | NA                      | R01_cb13464_c2/f3p0/437          | NA                          | NA                               |
| R01_cb17973_c16/f1p0/1313        | NA                      | R01_cb17973_c16/f1p0/1313        | NA                          | R01_cb17973_c16/f1p0/1313        |
| R01_cb12480_c15/f1p0/631         | NA                      | R01_cb12480_c15/f1p0/631         | R01_cb12480_c15/f1p0/631    | R01_cb12480_c15/f1p0/631         |
| R01_cb12217_c2/f1p0/662          | NA                      | R01_cb12217_c2/f1p0/662          | NA                          | NA                               |
| R01_cb8564_c123204/f1p0/243<br>4 | NA                      | NA                               | NA                          | R01_cb8564_c123204/f1p0/243<br>4 |
| R01_cb3099_c1/f1p0/3606          | R01_cb3099_c1/f1p0/3606 | R01_cb3099_c1/f1p0/3606          | R01_cb3099_c1/f1p0/3606     | R01_cb3099_c1/f1p0/3606          |



|                              |                              |                              |                              |                              |
|------------------------------|------------------------------|------------------------------|------------------------------|------------------------------|
| R01_cb10759_c0/flp0/950      | NA                           | NA                           | NA                           | R01_cb10759_c0/flp0/950      |
| R01_cb15745_c6/flp0/1124     | NA                           | R01_cb15745_c6/flp0/1124     | R01_cb15745_c6/flp0/1124     | R01_cb15745_c6/flp0/1124     |
| R01_cb1982_c8/flp0/863       | R01_cb1982_c8/flp0/863       | R01_cb1982_c8/flp0/863       | R01_cb1982_c8/flp0/863       | R01_cb1982_c8/flp0/863       |
| R01_cb1964_c3/flp0/3397      | NA                           | R01_cb1964_c3/flp0/3397      | NA                           | R01_cb1964_c3/flp0/3397      |
| R01_cb15227_c5/flp0/1255     | NA                           | NA                           | NA                           | R01_cb15227_c5/flp0/1255     |
| R01_cb8564_c83309/flp0/2039  | NA                           | R01_cb8564_c83309/flp0/2039  | NA                           | R01_cb8564_c83309/flp0/2039  |
| R01_cb13257_c5/flp0/1109     | NA                           | R01_cb13257_c5/flp0/1109     | NA                           | NA                           |
| R01_cb9179_c0/flp0/2162      | NA                           | NA                           | NA                           | R01_cb9179_c0/flp0/2162      |
| R01_cb11918_c9/flp0/766      | NA                           | NA                           | NA                           | R01_cb11918_c9/flp0/766      |
| R01_cb12240_c4/f2p1/605      | R01_cb12240_c4/f2p1/605      | R01_cb12240_c4/f2p1/605      | NA                           | NA                           |
| R01_cb8564_c13387/flp0/2824  | NA                           | NA                           | R01_cb8564_c13387/flp0/2824  | R01_cb8564_c13387/flp0/2824  |
| R01_cb11507_c2/flp0/1259     | R01_cb11507_c2/flp0/1259     | R01_cb11507_c2/flp0/1259     | R01_cb11507_c2/flp0/1259     | R01_cb11507_c2/flp0/1259     |
| R01_cb15334_c3/flp0/1167     | R01_cb15334_c3/flp0/1167     | R01_cb15334_c3/flp0/1167     | R01_cb15334_c3/flp0/1167     | R01_cb15334_c3/flp0/1167     |
| R01_cb8564_c116623/flp0/2525 | NA                           | R01_cb8564_c116623/flp0/2525 | NA                           | NA                           |
| R01_cb11660_c1/flp0/2817     | NA                           | R01_cb11660_c1/flp0/2817     | NA                           | NA                           |
| R01_cb8564_c112331/flp4/2084 | NA                           | R01_cb8564_c112331/flp4/2084 | NA                           | NA                           |
| R01_cb18301_c11/flp0/1709    | R01_cb18301_c11/flp0/1709    | R01_cb18301_c11/flp0/1709    | R01_cb18301_c11/flp0/1709    | R01_cb18301_c11/flp0/1709    |
| R01_cb14968_c18/flp0/1816    | NA                           | NA                           | NA                           | R01_cb14968_c18/flp0/1816    |
| R01_cb7248_c1/flp0/3567      | NA                           | R01_cb7248_c1/flp0/3567      | NA                           | NA                           |
| R01_cb4286_c7/flp0/3033      | NA                           | R01_cb4286_c7/flp0/3033      | NA                           | NA                           |
| R01_cb10844_c2/flp0/1392     | NA                           | NA                           | NA                           | R01_cb10844_c2/flp0/1392     |
| R01_cb12110_c2/flp1/658      | R01_cb12110_c2/flp1/658      | R01_cb12110_c2/flp1/658      | NA                           | R01_cb12110_c2/flp1/658      |
| R01_cb8564_c47502/flp0/22066 | R01_cb8564_c47502/flp0/22066 | R01_cb8564_c47502/flp0/22066 | R01_cb8564_c47502/flp0/22066 | R01_cb8564_c47502/flp0/22066 |

|                             |                             |                             |                             |                             |
|-----------------------------|-----------------------------|-----------------------------|-----------------------------|-----------------------------|
| R01_cb10702_c0/flp0/1132    | R01_cb10702_c0/flp0/1132    | R01_cb10702_c0/flp0/1132    | R01_cb10702_c0/flp0/1132    | R01_cb10702_c0/flp0/1132    |
| R01_cb16269_c0/flp0/1523    | R01_cb16269_c0/flp0/1523    | R01_cb16269_c0/flp0/1523    | NA                          | R01_cb16269_c0/flp0/1523    |
| R01_cb822_c36/f4p1/2420     | NA                          | NA                          | NA                          | R01_cb822_c36/f4p1/2420     |
| R01_cb16875_c1/flp0/641     | R01_cb16875_c1/flp0/641     | R01_cb16875_c1/flp0/641     | R01_cb16875_c1/flp0/641     | R01_cb16875_c1/flp0/641     |
| R01_cb12740_c14/flp0/525    | R01_cb12740_c14/flp0/525    | R01_cb12740_c14/flp0/525    | NA                          | R01_cb12740_c14/flp0/525    |
| R01_cb8564_c554/f4p0/3007   | NA                          | NA                          | NA                          | R01_cb8564_c554/f4p0/3007   |
| R01_cb4768_c28/flp0/2027    | NA                          | R01_cb4768_c28/flp0/2027    | NA                          | NA                          |
| R01_cb18386_c22/flp0/5179   | NA                          | R01_cb18386_c22/flp0/5179   | NA                          | NA                          |
| R01_cb4198_c0/f2p0/1850     | NA                          | NA                          | NA                          | R01_cb4198_c0/f2p0/1850     |
| R01_cb1264_c1/f2p0/4088     | NA                          | NA                          | NA                          | R01_cb1264_c1/f2p0/4088     |
| R01_cb8564_c89156/flp0/3538 | NA                          | R01_cb8564_c89156/flp0/3538 | NA                          | NA                          |
| R01_cb18456_c512/flp1/991   | NA                          | R01_cb18456_c512/flp1/991   | NA                          | NA                          |
| R01_cb5625_c3/flp0/2869     | NA                          | R01_cb5625_c3/flp0/2869     | NA                          | R01_cb5625_c3/flp0/2869     |
| R01_cb11147_c1/flp0/1304    | NA                          | R01_cb11147_c1/flp0/1304    | NA                          | R01_cb11147_c1/flp0/1304    |
| R01_cb8564_c78670/flp0/3869 | NA                          | NA                          | NA                          | R01_cb8564_c78670/flp0/3869 |
| R01_cb17314_c0/flp0/888     | R01_cb17314_c0/flp0/888     | R01_cb17314_c0/flp0/888     | R01_cb17314_c0/flp0/888     | R01_cb17314_c0/flp0/888     |
| R01_cb5659_c76/flp0/2387    | NA                          | NA                          | NA                          | R01_cb5659_c76/flp0/2387    |
| R01_cb8564_c10936/flp0/3711 | NA                          | R01_cb8564_c10936/flp0/3711 | NA                          | R01_cb8564_c10936/flp0/3711 |
| R01_cb12420_c5/flp0/1235    | NA                          | NA                          | NA                          | R01_cb12420_c5/flp0/1235    |
| R01_cb8564_c91686/flp0/3380 | NA                          | NA                          | NA                          | R01_cb8564_c91686/flp0/3380 |
| R01_cb18456_c7187/flp0/1303 | R01_cb18456_c7187/flp0/1303 | R01_cb18456_c7187/flp0/1303 | R01_cb18456_c7187/flp0/1303 | R01_cb18456_c7187/flp0/1303 |
| R01_cb10175_c0/f2p0/1005    | NA                          | R01_cb10175_c0/f2p0/1005    | NA                          | NA                          |
| R01_cb7985_c0/f2p0/2381     | NA                          | R01_cb7985_c0/f2p0/2381     | R01_cb7985_c0/f2p0/2381     | R01_cb7985_c0/f2p0/2381     |
| R01_cb6645_c1/flp0/2041     | NA                          | NA                          | R01_cb6645_c1/flp0/2041     | R01_cb6645_c1/flp0/2041     |
| R01_cb6802_c6/flp0/2764     | NA                          | R01_cb6802_c6/flp0/2764     | NA                          | NA                          |

|                              |                             |                              |                              |                              |
|------------------------------|-----------------------------|------------------------------|------------------------------|------------------------------|
| R01_cb18456_c7803/f6p0/729   | NA                          | R01_cb18456_c7803/f6p0/729   | R01_cb18456_c7803/f6p0/729   | R01_cb18456_c7803/f6p0/729   |
| R01_cb1377_c4/f1p0/1849      | NA                          | NA                           | NA                           | R01_cb1377_c4/f1p0/1849      |
| R01_cb1248_c6/f1p0/6793      | NA                          | NA                           | NA                           | R01_cb1248_c6/f1p0/6793      |
| R01_cb18456_c5454/f1p0/1203  | NA                          | R01_cb18456_c5454/f1p0/1203  | NA                           | NA                           |
| R01_cb15569_c1/f2p0/1413     | NA                          | NA                           | R01_cb15569_c1/f2p0/1413     | NA                           |
| R01_cb15917_c0/f1p0/479      | NA                          | R01_cb15917_c0/f1p0/479      | NA                           | NA                           |
| R01_cb8564_c88696/f1p0/3540  | NA                          | NA                           | NA                           | R01_cb8564_c88696/f1p0/3540  |
| R01_cb14704_c7/f1p0/1661     | NA                          | R01_cb14704_c7/f1p0/1661     | NA                           | NA                           |
| R01_cb9987_c3/f1p0/1686      | NA                          | R01_cb9987_c3/f1p0/1686      | NA                           | R01_cb9987_c3/f1p0/1686      |
| R01_cb10237_c2/f1p0/1256     | NA                          | NA                           | NA                           | R01_cb10237_c2/f1p0/1256     |
| R01_cb14727_c0/f2p0/785      | NA                          | NA                           | R01_cb14727_c0/f2p0/785      | R01_cb14727_c0/f2p0/785      |
| R01_cb9422_c4/f1p0/1518      | NA                          | R01_cb9422_c4/f1p0/1518      | NA                           | NA                           |
| R01_cb261_c44/f1p0/2433      | NA                          | R01_cb261_c44/f1p0/2433      | NA                           | R01_cb261_c44/f1p0/2433      |
| R01_cb763_c5/f1p0/4241       | NA                          | R01_cb763_c5/f1p0/4241       | R01_cb763_c5/f1p0/4241       | R01_cb763_c5/f1p0/4241       |
| R01_cb12061_c6/f1p0/796      | NA                          | NA                           | R01_cb12061_c6/f1p0/796      | R01_cb12061_c6/f1p0/796      |
| R01_cb7814_c9/f1p0/2692      | NA                          | NA                           | NA                           | R01_cb7814_c9/f1p0/2692      |
| R01_cb8564_c18745/f3p1/4268  | R01_cb8564_c18745/f3p1/4268 | R01_cb8564_c18745/f3p1/4268  | R01_cb8564_c18745/f3p1/4268  | R01_cb8564_c18745/f3p1/4268  |
| R01_cb8281_c0/f5p0/2077      | NA                          | NA                           | NA                           | R01_cb8281_c0/f5p0/2077      |
| R01_cb2154_c8/f1p0/3166      | NA                          | R01_cb2154_c8/f1p0/3166      | NA                           | NA                           |
| R01_cb8564_c124811/f1p0/2286 | NA                          | R01_cb8564_c124811/f1p0/2286 | R01_cb8564_c124811/f1p0/2286 | R01_cb8564_c124811/f1p0/2286 |
| R01_cb13558_c4/f1p0/696      | NA                          | NA                           | R01_cb13558_c4/f1p0/696      | R01_cb13558_c4/f1p0/696      |
| R01_cb1077_c9/f1p0/4487      | NA                          | R01_cb1077_c9/f1p0/4487      | NA                           | NA                           |
| R01_cb11543_c0/f1p0/1881     | NA                          | NA                           | NA                           | R01_cb11543_c0/f1p0/1881     |
| R01_cb2571_c22/f1p0/3889     | NA                          | NA                           | NA                           | R01_cb2571_c22/f1p0/3889     |

|                              |                          |                              |                              |                              |
|------------------------------|--------------------------|------------------------------|------------------------------|------------------------------|
| R01_cb9757_c5/flp0/2750      | NA                       | R01_cb9757_c5/flp0/2750      | R01_cb9757_c5/flp0/2750      | R01_cb9757_c5/flp0/2750      |
| R01_cb6752_c1/flp0/2113      | NA                       | R01_cb6752_c1/flp0/2113      | NA                           | R01_cb6752_c1/flp0/2113      |
| R01_cb11743_c0/flp0/1002     | NA                       | R01_cb11743_c0/flp0/1002     | R01_cb11743_c0/flp0/1002     | R01_cb11743_c0/flp0/1002     |
| R01_cb18398_c0/flp0/1444     | NA                       | R01_cb18398_c0/flp0/1444     | R01_cb18398_c0/flp0/1444     | NA                           |
| R01_cb9232_c1/flp0/2771      | NA                       | NA                           | NA                           | R01_cb9232_c1/flp0/2771      |
| R01_cb14502_c17/flp0/402     | R01_cb14502_c17/flp0/402 | R01_cb14502_c17/flp0/402     | R01_cb14502_c17/flp0/402     | R01_cb14502_c17/flp0/402     |
| R01_cb8564_c3241/flp0/3032   | NA                       | R01_cb8564_c3241/flp0/3032   | R01_cb8564_c3241/flp0/3032   | R01_cb8564_c3241/flp0/3032   |
| R01_cb17149_c1/flp0/1676     | R01_cb17149_c1/flp0/1676 | R01_cb17149_c1/flp0/1676     | R01_cb17149_c1/flp0/1676     | R01_cb17149_c1/flp0/1676     |
| R01_cb4434_c6/flp0/3018      | NA                       | NA                           | NA                           | R01_cb4434_c6/flp0/3018      |
| R01_cb18513_c0/flp0/749      | R01_cb18513_c0/flp0/749  | R01_cb18513_c0/flp0/749      | R01_cb18513_c0/flp0/749      | R01_cb18513_c0/flp0/749      |
| R01_cb8564_c112416/flp0/1908 | NA                       | R01_cb8564_c112416/flp0/1908 | NA                           | R01_cb8564_c112416/flp0/1908 |
| R01_cb7653_c10/flp0/3029     | NA                       | R01_cb7653_c10/flp0/3029     | NA                           | R01_cb7653_c10/flp0/3029     |
| R01_cb8564_c69950/flp0/2760  | NA                       | R01_cb8564_c69950/flp0/2760  | R01_cb8564_c69950/flp0/2760  | NA                           |
| R01_cb8564_c121937/flp0/2803 | NA                       | R01_cb8564_c121937/flp0/2803 | R01_cb8564_c121937/flp0/2803 | R01_cb8564_c121937/flp0/2803 |
| R01_cb10397_c2/flp0/816      | NA                       | R01_cb10397_c2/flp0/816      | NA                           | R01_cb10397_c2/flp0/816      |
| R01_cb8564_c69529/flp0/4528  | NA                       | NA                           | NA                           | R01_cb8564_c69529/flp0/4528  |
| R01_cb7552_c1/flp0/2685      | NA                       | NA                           | NA                           | R01_cb7552_c1/flp0/2685      |
| R01_cb12785_c30/f2p0/1064    | NA                       | NA                           | R01_cb12785_c30/f2p0/1064    | NA                           |
| R01_cb4505_c1/flp0/2787      | NA                       | R01_cb4505_c1/flp0/2787      | R01_cb4505_c1/flp0/2787      | NA                           |
| R01_cb8865_c3/flp0/2075      | NA                       | R01_cb8865_c3/flp0/2075      | NA                           | R01_cb8865_c3/flp0/2075      |
| R01_cb18473_c2/flp1/1761     | NA                       | NA                           | NA                           | R01_cb18473_c2/flp1/1761     |
| R01_cb4094_c19/flp3/693      | NA                       | R01_cb4094_c19/flp3/693      | NA                           | NA                           |
| R01_cb8809_c13/flp0/2609     | NA                       | NA                           | NA                           | R01_cb8809_c13/flp0/2609     |
| R01_cb8564_c68762/f3p0/2900  | NA                       | NA                           | NA                           | R01_cb8564_c68762/f3p0/2900  |

|                              |                           |                              |                           |                            |
|------------------------------|---------------------------|------------------------------|---------------------------|----------------------------|
| R01_cb6454_c11/flp2/2533     | NA                        | R01_cb6454_c11/flp2/2533     | NA                        | NA                         |
| R01_cb7642_c167/flp2/2047    | R01_cb7642_c167/flp2/2047 | R01_cb7642_c167/flp2/2047    | NA                        | NA                         |
| R01_cb6258_c22/flp0/2295     | NA                        | NA                           | NA                        | R01_cb6258_c22/flp0/2295   |
| R01_cb10328_c7/flp1/971      | R01_cb10328_c7/flp1/971   | R01_cb10328_c7/flp1/971      | NA                        | NA                         |
| R01_cb8973_c4/flp0/387       | R01_cb8973_c4/flp0/387    | R01_cb8973_c4/flp0/387       | R01_cb8973_c4/flp0/387    | NA                         |
| R01_cb17910_c0/flp0/951      | NA                        | R01_cb17910_c0/flp0/951      | NA                        | NA                         |
| R01_cb8564_c110469/flp0/2627 | NA                        | R01_cb8564_c110469/flp0/2627 | NA                        | NA                         |
| R01_cb2543_c34/flp1/2506     | R01_cb2543_c34/flp1/2506  | NA                           | NA                        | NA                         |
| R01_cb947_c12/flp0/2397      | NA                        | R01_cb947_c12/flp0/2397      | NA                        | NA                         |
| R01_cb5910_c20/flp0/1822     | R01_cb5910_c20/flp0/1822  | R01_cb5910_c20/flp0/1822     | NA                        | NA                         |
| R01_cb12401_c14/f3p1/1451    | NA                        | R01_cb12401_c14/f3p1/1451    | NA                        | NA                         |
| R01_cb17044_c16/flp0/1871    | R01_cb17044_c16/flp0/1871 | R01_cb17044_c16/flp0/1871    | R01_cb17044_c16/flp0/1871 | R01_cb17044_c16/flp0/1871  |
| R01_cb15675_c0/f4p0/503      | R01_cb15675_c0/f4p0/503   | R01_cb15675_c0/f4p0/503      | R01_cb15675_c0/f4p0/503   | R01_cb15675_c0/f4p0/503    |
| R01_cb14316_c19/flp0/399     | R01_cb14316_c19/flp0/399  | R01_cb14316_c19/flp0/399     | R01_cb14316_c19/flp0/399  | R01_cb14316_c19/flp0/399   |
| R01_cb14019_c2/flp0/1643     | NA                        | R01_cb14019_c2/flp0/1643     | R01_cb14019_c2/flp0/1643  | R01_cb14019_c2/flp0/1643   |
| R01_cb1459_c7/flp1/2451      | NA                        | R01_cb1459_c7/flp1/2451      | NA                        | NA                         |
| R01_cb9312_c1/flp0/2107      | NA                        | R01_cb9312_c1/flp0/2107      | R01_cb9312_c1/flp0/2107   | R01_cb9312_c1/flp0/2107    |
| R01_cb2686_c5/flp0/3171      | NA                        | R01_cb2686_c5/flp0/3171      | NA                        | NA                         |
| R01_cb4968_c0/f2p0/764       | R01_cb4968_c0/f2p0/764    | R01_cb4968_c0/f2p0/764       | R01_cb4968_c0/f2p0/764    | R01_cb4968_c0/f2p0/764     |
| R01_cb6923_c27/flp0/2324     | NA                        | R01_cb6923_c27/flp0/2324     | NA                        | R01_cb6923_c27/flp0/2324   |
| R01_cb2445_c24/flp0/3446     | NA                        | NA                           | NA                        | R01_cb2445_c24/flp0/3446   |
| R01_cb11564_c1/flp0/2645     | NA                        | R01_cb11564_c1/flp0/2645     | NA                        | NA                         |
| R01_cb16312_c2/flp0/858      | NA                        | R01_cb16312_c2/flp0/858      | NA                        | NA                         |
| R01_cb18456_c4768/flp0/552   | NA                        | NA                           | NA                        | R01_cb18456_c4768/flp0/552 |
| R01_cb12175_c1/flp0/351      | R01_cb12175_c1/flp0/351   | R01_cb12175_c1/flp0/351      | R01_cb12175_c1/flp0/351   | R01_cb12175_c1/flp0/351    |

|                             |                             |                             |                             |                             |
|-----------------------------|-----------------------------|-----------------------------|-----------------------------|-----------------------------|
| R01_cb8564_c89955/f1p0/2396 | NA                          | R01_cb8564_c89955/f1p0/2396 | R01_cb8564_c89955/f1p0/2396 | R01_cb8564_c89955/f1p0/2396 |
| R01_cb18482_c1/f1p0/1852    | NA                          | NA                          | NA                          | R01_cb18482_c1/f1p0/1852    |
| R01_cb12059_c11/f1p0/551    | NA                          | R01_cb12059_c11/f1p0/551    | NA                          | NA                          |
| R01_cb16387_c14/f1p0/795    | R01_cb16387_c14/f1p0/795    | R01_cb16387_c14/f1p0/795    | R01_cb16387_c14/f1p0/795    | R01_cb16387_c14/f1p0/795    |
| R01_cb18456_c2477/f1p0/1616 | NA                          | R01_cb18456_c2477/f1p0/1616 | NA                          | R01_cb18456_c2477/f1p0/1616 |
| R01_cb10413_c3/f1p0/1833    | R01_cb10413_c3/f1p0/1833    | R01_cb10413_c3/f1p0/1833    | R01_cb10413_c3/f1p0/1833    | R01_cb10413_c3/f1p0/1833    |
| R01_cb17008_c0/f1p0/898     | NA                          | NA                          | R01_cb17008_c0/f1p0/898     | NA                          |
| R01_cb16722_c1/f2p0/500     | R01_cb16722_c1/f2p0/500     | R01_cb16722_c1/f2p0/500     | NA                          | R01_cb16722_c1/f2p0/500     |
| R01_cb8564_c23105/f3p0/4922 | NA                          | R01_cb8564_c23105/f3p0/4922 | NA                          | NA                          |
| R01_cb11376_c2/f1p0/946     | NA                          | R01_cb11376_c2/f1p0/946     | NA                          | R01_cb11376_c2/f1p0/946     |
| R01_cb506_c0/f2p0/4721      | NA                          | NA                          | NA                          | R01_cb506_c0/f2p0/4721      |
| R01_cb8213_c1/f4p2/2420     | NA                          | NA                          | NA                          | R01_cb8213_c1/f4p2/2420     |
| R01_cb11064_c1/f1p0/2698    | NA                          | R01_cb11064_c1/f1p0/2698    | NA                          | R01_cb11064_c1/f1p0/2698    |
| R01_cb18587_c1/f1p0/968     | NA                          | NA                          | NA                          | R01_cb18587_c1/f1p0/968     |
| R01_cb8564_c69463/f1p0/3886 | NA                          | NA                          | NA                          | R01_cb8564_c69463/f1p0/3886 |
| R01_cb6113_c5/f1p0/1920     | NA                          | NA                          | NA                          | R01_cb6113_c5/f1p0/1920     |
| R01_cb69_c20/f1p0/3744      | NA                          | NA                          | NA                          | R01_cb69_c20/f1p0/3744      |
| R01_cb8564_c121948/f1p0/324 | NA                          | NA                          | NA                          | R01_cb8564_c121948/f1p0/324 |
| 5                           |                             |                             |                             | 5                           |
| R01_cb1085_c16/f1p0/3999    | NA                          | NA                          | NA                          | R01_cb1085_c16/f1p0/3999    |
| R01_cb8564_c3064/f2p0/3451  | NA                          | R01_cb8564_c3064/f2p0/3451  | NA                          | R01_cb8564_c3064/f2p0/3451  |
| R01_cb8564_c9972/f2p0/3952  | NA                          | NA                          | NA                          | R01_cb8564_c9972/f2p0/3952  |
| R01_cb2701_c5/f1p0/3508     | NA                          | R01_cb2701_c5/f1p0/3508     | NA                          | R01_cb2701_c5/f1p0/3508     |
| R01_cb8564_c72283/f1p0/2502 | R01_cb8564_c72283/f1p0/2502 | R01_cb8564_c72283/f1p0/2502 | R01_cb8564_c72283/f1p0/2502 | R01_cb8564_c72283/f1p0/2502 |
| 2                           |                             |                             |                             |                             |
| R01_cb8564_c12568/f1p3/3477 | NA                          | R01_cb8564_c12568/f1p3/3477 | R01_cb8564_c12568/f1p3/3477 | R01_cb8564_c12568/f1p3/3477 |

|                              |                             |                             |                             |                              |
|------------------------------|-----------------------------|-----------------------------|-----------------------------|------------------------------|
| R01_cb8564_c3691/f1p0/3023   | R01_cb8564_c3691/f1p0/3023  | R01_cb8564_c3691/f1p0/3023  | R01_cb8564_c3691/f1p0/3023  | R01_cb8564_c3691/f1p0/3023   |
| R01_cb10602_c2/f1p0/1509     | NA                          | R01_cb10602_c2/f1p0/1509    | NA                          | NA                           |
| R01_cb8564_c127948/f1p0/2638 | NA                          | NA                          | NA                          | R01_cb8564_c127948/f1p0/2638 |
| R01_cb7268_c2/f1p0/1955      | NA                          | NA                          | R01_cb7268_c2/f1p0/1955     | NA                           |
| R01_cb7484_c8/f1p0/836       | NA                          | R01_cb7484_c8/f1p0/836      | NA                          | R01_cb7484_c8/f1p0/836       |
| R01_cb9359_c5/f1p0/741       | NA                          | R01_cb9359_c5/f1p0/741      | R01_cb9359_c5/f1p0/741      | R01_cb9359_c5/f1p0/741       |
| R01_cb8564_c108071/f9p6/4539 | NA                          | NA                          | NA                          | R01_cb8564_c108071/f9p6/4539 |
| R01_cb14524_c7/f1p1/1689     | NA                          | R01_cb14524_c7/f1p1/1689    | NA                          | NA                           |
| R01_cb2619_c5/f1p0/1091      | NA                          | NA                          | NA                          | R01_cb2619_c5/f1p0/1091      |
| R01_cb8564_c4957/f1p0/2371   | R01_cb8564_c4957/f1p0/2371  | R01_cb8564_c4957/f1p0/2371  | R01_cb8564_c4957/f1p0/2371  | R01_cb8564_c4957/f1p0/2371   |
| R01_cb8265_c1/f1p0/2774      | NA                          | NA                          | NA                          | R01_cb8265_c1/f1p0/2774      |
| R01_cb12722_c11/f1p0/539     | NA                          | R01_cb12722_c11/f1p0/539    | NA                          | R01_cb12722_c11/f1p0/539     |
| R01_cb18409_c19/f2p0/522     | R01_cb18409_c19/f2p0/522    | R01_cb18409_c19/f2p0/522    | R01_cb18409_c19/f2p0/522    | R01_cb18409_c19/f2p0/522     |
| R01_cb17476_c8/f1p0/779      | NA                          | R01_cb17476_c8/f1p0/779     | NA                          | NA                           |
| R01_cb8564_c10008/f3p1/1921  | R01_cb8564_c10008/f3p1/1921 | R01_cb8564_c10008/f3p1/1921 | R01_cb8564_c10008/f3p1/1921 | R01_cb8564_c10008/f3p1/1921  |
| R01_cb7618_c8/f1p0/620       | R01_cb7618_c8/f1p0/620      | NA                          | NA                          | NA                           |
| R01_cb13626_c1/f1p0/620      | NA                          | R01_cb13626_c1/f1p0/620     | NA                          | R01_cb13626_c1/f1p0/620      |
| R01_cb18539_c0/f1p0/617      | NA                          | R01_cb18539_c0/f1p0/617     | R01_cb18539_c0/f1p0/617     | R01_cb18539_c0/f1p0/617      |
| R01_cb8564_c13186/f1p0/3566  | NA                          | R01_cb8564_c13186/f1p0/3566 | NA                          | NA                           |
| R01_cb8564_c83392/f1p0/2890  | NA                          | NA                          | NA                          | R01_cb8564_c83392/f1p0/2890  |
| R01_cb18780_c4/f1p15/7629    | NA                          | R01_cb18780_c4/f1p15/7629   | NA                          | NA                           |
| R01_cb9551_c1/f1p0/2283      | NA                          | NA                          | NA                          | R01_cb9551_c1/f1p0/2283      |
| R01_cb14831_c3/f1p0/925      | NA                          | R01_cb14831_c3/f1p0/925     | NA                          | NA                           |

|                              |                          |                              |                              |                             |
|------------------------------|--------------------------|------------------------------|------------------------------|-----------------------------|
| R01_cb3295_c0/f3p0/3001      | NA                       | R01_cb3295_c0/f3p0/3001      | R01_cb3295_c0/f3p0/3001      | R01_cb3295_c0/f3p0/3001     |
| R01_cb6547_c1/f3p1/2576      | NA                       | NA                           | NA                           | R01_cb6547_c1/f3p1/2576     |
| R01_cb6141_c2/f1p0/2862      | NA                       | R01_cb6141_c2/f1p0/2862      | NA                           | NA                          |
| R01_cb8564_c717/f5p1/2631    | NA                       | R01_cb8564_c717/f5p1/2631    | NA                           | NA                          |
| R01_cb1448_c8/f1p0/3617      | NA                       | R01_cb1448_c8/f1p0/3617      | NA                           | NA                          |
| R01_cb18159_c0/f1p0/1722     | R01_cb18159_c0/f1p0/1722 | R01_cb18159_c0/f1p0/1722     | R01_cb18159_c0/f1p0/1722     | NA                          |
| R01_cb15814_c3/f2p0/1207     | NA                       | NA                           | NA                           | R01_cb15814_c3/f2p0/1207    |
| R01_cb1673_c1/f1p0/4194      | R01_cb1673_c1/f1p0/4194  | R01_cb1673_c1/f1p0/4194      | NA                           | R01_cb1673_c1/f1p0/4194     |
| R01_cb8564_c69249/f3p0/2365  | NA                       | R01_cb8564_c69249/f3p0/2365  | R01_cb8564_c69249/f3p0/2365  | R01_cb8564_c69249/f3p0/2365 |
| R01_cb8564_c91569/f1p0/3035  | NA                       | R01_cb8564_c91569/f1p0/3035  | R01_cb8564_c91569/f1p0/3035  | NA                          |
| R01_cb3478_c4/f1p1/2986      | NA                       | R01_cb3478_c4/f1p1/2986      | R01_cb3478_c4/f1p1/2986      | R01_cb3478_c4/f1p1/2986     |
| R01_cb8564_c23361/f1p0/3463  | NA                       | R01_cb8564_c23361/f1p0/3463  | NA                           | NA                          |
| R01_cb18113_c3/f1p0/913      | NA                       | R01_cb18113_c3/f1p0/913      | R01_cb18113_c3/f1p0/913      | R01_cb18113_c3/f1p0/913     |
| R01_cb10467_c3/f1p1/2340     | NA                       | R01_cb10467_c3/f1p1/2340     | NA                           | NA                          |
| R01_cb6032_c10/f2p0/2950     | R01_cb6032_c10/f2p0/2950 | R01_cb6032_c10/f2p0/2950     | NA                           | R01_cb6032_c10/f2p0/2950    |
| R01_cb6333_c6/f1p0/2996      | NA                       | R01_cb6333_c6/f1p0/2996      | NA                           | NA                          |
| R01_cb4819_c5/f1p0/1224      | NA                       | R01_cb4819_c5/f1p0/1224      | R01_cb4819_c5/f1p0/1224      | R01_cb4819_c5/f1p0/1224     |
| R01_cb8564_c11209/f1p0/2189  | NA                       | NA                           | NA                           | R01_cb8564_c11209/f1p0/2189 |
| R01_cb10556_c3/f1p0/1457     | NA                       | NA                           | NA                           | R01_cb10556_c3/f1p0/1457    |
| R01_cb8564_c115621/f1p0/2138 | NA                       | R01_cb8564_c115621/f1p0/2138 | R01_cb8564_c115621/f1p0/2138 | NA                          |
| R01_cb7334_c5/f1p0/1950      | NA                       | NA                           | NA                           | R01_cb7334_c5/f1p0/1950     |
| R01_cb6582_c18/f1p0/3412     | NA                       | NA                           | R01_cb6582_c18/f1p0/3412     | R01_cb6582_c18/f1p0/3412    |
| R01_cb16152_c1/f1p0/724      | R01_cb16152_c1/f1p0/724  | R01_cb16152_c1/f1p0/724      | R01_cb16152_c1/f1p0/724      | R01_cb16152_c1/f1p0/724     |
| R01_cb15169_c2/f3p0/1079     | NA                       | NA                           | NA                           | R01_cb15169_c2/f3p0/1079    |
| R01_cb16465_c3/f1p0/1112     | NA                       | NA                           | NA                           | R01_cb16465_c3/f1p0/1112    |



|                                  |                          |                                  |                                  |                                  |
|----------------------------------|--------------------------|----------------------------------|----------------------------------|----------------------------------|
| R01_cb1030_c19/flp0/4124         | NA                       | NA                               | NA                               | R01_cb1030_c19/flp0/4124         |
| R01_cb3014_c1/flp0/3259          | NA                       | R01_cb3014_c1/flp0/3259          | NA                               | NA                               |
| R01_cb3295_c1/flp0/3665          | NA                       | R01_cb3295_c1/flp0/3665          | R01_cb3295_c1/flp0/3665          | R01_cb3295_c1/flp0/3665          |
| R01_cb10909_c5/flp0/1742         | NA                       | R01_cb10909_c5/flp0/1742         | NA                               | R01_cb10909_c5/flp0/1742         |
| R01_cb8564_c176016/f8p4/482<br>3 | NA                       | R01_cb8564_c176016/f8p4/482<br>3 | R01_cb8564_c176016/f8p4/482<br>3 | R01_cb8564_c176016/f8p4/482<br>3 |
| R01_cb5800_c2/flp0/3449          | NA                       | R01_cb5800_c2/flp0/3449          | NA                               | NA                               |
| R01_cb8564_c74065/flp0/2258      | NA                       | R01_cb8564_c74065/flp0/2258      | NA                               | NA                               |
| R01_cb18409_c50/flp0/376         | R01_cb18409_c50/flp0/376 | R01_cb18409_c50/flp0/376         | R01_cb18409_c50/flp0/376         | R01_cb18409_c50/flp0/376         |
| R01_cb7257_c2/flp0/2073          | NA                       | NA                               | NA                               | R01_cb7257_c2/flp0/2073          |
| R01_cb8102_c19/flp0/1683         | NA                       | NA                               | NA                               | R01_cb8102_c19/flp0/1683         |
| R01_cb2309_c7/flp0/2411          | NA                       | R01_cb2309_c7/flp0/2411          | NA                               | NA                               |
| R01_cb4030_c1/flp0/3459          | NA                       | NA                               | NA                               | R01_cb4030_c1/flp0/3459          |
| R01_cb14316_c18/flp0/485         | R01_cb14316_c18/flp0/485 | R01_cb14316_c18/flp0/485         | R01_cb14316_c18/flp0/485         | R01_cb14316_c18/flp0/485         |
| R01_cb18456_c4709/flp0/480       | NA                       | NA                               | NA                               | R01_cb18456_c4709/flp0/480       |
| R01_cb16758_c1/flp0/1652         | NA                       | R01_cb16758_c1/flp0/1652         | NA                               | NA                               |
| R01_cb639_c7/flp0/748            | R01_cb639_c7/flp0/748    | R01_cb639_c7/flp0/748            | NA                               | R01_cb639_c7/flp0/748            |
| R01_cb9404_c2/flp0/2832          | R01_cb9404_c2/flp0/2832  | R01_cb9404_c2/flp0/2832          | NA                               | NA                               |
| R01_cb6352_c13/flp0/5504         | R01_cb6352_c13/flp0/5504 | R01_cb6352_c13/flp0/5504         | NA                               | R01_cb6352_c13/flp0/5504         |
| R01_cb12740_c12/flp0/374         | R01_cb12740_c12/flp0/374 | R01_cb12740_c12/flp0/374         | R01_cb12740_c12/flp0/374         | R01_cb12740_c12/flp0/374         |
| R01_cb4715_c0/flp0/3277          | NA                       | NA                               | R01_cb4715_c0/flp0/3277          | R01_cb4715_c0/flp0/3277          |
| R01_cb2771_c13/flp0/3186         | NA                       | NA                               | NA                               | R01_cb2771_c13/flp0/3186         |
| R01_cb8533_c5/flp0/2301          | NA                       | R01_cb8533_c5/flp0/2301          | NA                               | NA                               |
| R01_cb8564_c22603/flp0/2515      | NA                       | R01_cb8564_c22603/flp0/2515      | NA                               | R01_cb8564_c22603/flp0/2515      |
| R01_cb11481_c0/flp0/576          | NA                       | R01_cb11481_c0/flp0/576          | NA                               | R01_cb11481_c0/flp0/576          |
| R01_cb18249_c0/flp0/1819         | R01_cb18249_c0/flp0/1819 | R01_cb18249_c0/flp0/1819         | R01_cb18249_c0/flp0/1819         | R01_cb18249_c0/flp0/1819         |

|                              |                              |                              |                              |                              |
|------------------------------|------------------------------|------------------------------|------------------------------|------------------------------|
| R01_cb16097_c0/flp0/1292     | NA                           | R01_cb16097_c0/flp0/1292     | NA                           | NA                           |
| R01_cb7738_c1/flp0/2547      | NA                           | NA                           | NA                           | R01_cb7738_c1/flp0/2547      |
| R01_cb7946_c1/flp0/2399      | R01_cb7946_c1/flp0/2399      | R01_cb7946_c1/flp0/2399      | NA                           | NA                           |
| R01_cb8564_c91695/flp1/2356  | NA                           | R01_cb8564_c91695/flp1/2356  | R01_cb8564_c91695/flp1/2356  | NA                           |
| R01_cb8882_c3/flp0/691       | NA                           | R01_cb8882_c3/flp0/691       | NA                           | NA                           |
| R01_cb3618_c8/flp0/3557      | NA                           | NA                           | NA                           | R01_cb3618_c8/flp0/3557      |
| R01_cb13318_c0/f2p0/1440     | NA                           | NA                           | NA                           | R01_cb13318_c0/f2p0/1440     |
| R01_cb3071_c2/flp0/1901      | NA                           | NA                           | NA                           | R01_cb3071_c2/flp0/1901      |
| R01_cb5683_c5/flp0/1541      | NA                           | R01_cb5683_c5/flp0/1541      | NA                           | NA                           |
| R01_cb16246_c2/flp0/1881     | NA                           | R01_cb16246_c2/flp0/1881     | NA                           | NA                           |
| R01_cb8564_c128354/flp0/2707 | R01_cb8564_c128354/flp0/2707 | R01_cb8564_c128354/flp0/2707 | R01_cb8564_c128354/flp0/2707 | R01_cb8564_c128354/flp0/2707 |
| R01_cb13146_c12/f72p7/663    | R01_cb13146_c12/f72p7/663    | R01_cb13146_c12/f72p7/663    | R01_cb13146_c12/f72p7/663    | R01_cb13146_c12/f72p7/663    |
| R01_cb1398_c13/flp0/2329     | NA                           | R01_cb1398_c13/flp0/2329     | R01_cb1398_c13/flp0/2329     | NA                           |
| R01_cb11465_c0/flp0/1245     | NA                           | NA                           | NA                           | R01_cb11465_c0/flp0/1245     |
| R01_cb5717_c0/flp0/3026      | NA                           | NA                           | NA                           | R01_cb5717_c0/flp0/3026      |
| R01_cb2804_c151/flp0/2463    | NA                           | R01_cb2804_c151/flp0/2463    | R01_cb2804_c151/flp0/2463    | R01_cb2804_c151/flp0/2463    |
| R01_cb8564_c114729/flp1/2091 | NA                           | R01_cb8564_c114729/flp1/2091 | R01_cb8564_c114729/flp1/2091 | NA                           |
| R01_cb8564_c85227/flp0/2741  | NA                           | NA                           | NA                           | R01_cb8564_c85227/flp0/2741  |
| R01_cb3281_c2/f2p0/2588      | NA                           | R01_cb3281_c2/f2p0/2588      | NA                           | NA                           |
| R01_cb928_c7/flp0/2634       | NA                           | NA                           | NA                           | R01_cb928_c7/flp0/2634       |
| R01_cb16682_c2/f3p0/954      | R01_cb16682_c2/f3p0/954      | R01_cb16682_c2/f3p0/954      | R01_cb16682_c2/f3p0/954      | R01_cb16682_c2/f3p0/954      |
| R01_cb10394_c1/flp0/1985     | NA                           | NA                           | NA                           | R01_cb10394_c1/flp0/1985     |
| R01_cb8564_c13441/f2p2/3005  | NA                           | NA                           | NA                           | R01_cb8564_c13441/f2p2/3005  |
| R01_cb8564_c129572/flp0/248  | NA                           | R01_cb8564_c129572/flp0/248  | NA                           | NA                           |

|                             |                         |                             |                          |                             |
|-----------------------------|-------------------------|-----------------------------|--------------------------|-----------------------------|
| 3                           |                         | 3                           |                          |                             |
| R01_cb10640_c6/flp0/450     | R01_cb10640_c6/flp0/450 | R01_cb10640_c6/flp0/450     | R01_cb10640_c6/flp0/450  | R01_cb10640_c6/flp0/450     |
| R01_cb14267_c2/flp0/385     | R01_cb14267_c2/flp0/385 | R01_cb14267_c2/flp0/385     | R01_cb14267_c2/flp0/385  | R01_cb14267_c2/flp0/385     |
| R01_cb4410_c4/flp0/5344     | NA                      | R01_cb4410_c4/flp0/5344     | NA                       | NA                          |
| R01_cb2226_c4/flp1/4842     | NA                      | NA                          | NA                       | R01_cb2226_c4/flp1/4842     |
| R01_cb18456_c2533/flp1/1470 | NA                      | R01_cb18456_c2533/flp1/1470 | NA                       | NA                          |
| R01_cb8564_c91933/flp0/2295 | NA                      | NA                          | NA                       | R01_cb8564_c91933/flp0/2295 |
| R01_cb5017_c3/flp0/2006     | NA                      | NA                          | NA                       | R01_cb5017_c3/flp0/2006     |
| R01_cb10636_c10/flp1/1193   | NA                      | R01_cb10636_c10/flp1/1193   | NA                       | NA                          |
| R01_cb17744_c16/flp0/3043   | NA                      | NA                          | NA                       | R01_cb17744_c16/flp0/3043   |
| R01_cb8564_c81975/flp2/2386 | NA                      | R01_cb8564_c81975/flp2/2386 | NA                       | R01_cb8564_c81975/flp2/2386 |
| R01_cb8564_c4523/flp0/2561  | NA                      | R01_cb8564_c4523/flp0/2561  | NA                       | NA                          |
| R01_cb18487_c2/flp0/1532    | NA                      | R01_cb18487_c2/flp0/1532    | R01_cb18487_c2/flp0/1532 | R01_cb18487_c2/flp0/1532    |
| R01_cb8564_c38665/flp0/4695 | NA                      | R01_cb8564_c38665/flp0/4695 | NA                       | NA                          |
| R01_cb8564_c146271/f5p0/427 | NA                      | R01_cb8564_c146271/f5p0/427 | NA                       | NA                          |
| 6                           |                         | 6                           |                          |                             |
| R01_cb4805_c5/flp0/3640     | NA                      | R01_cb4805_c5/flp0/3640     | NA                       | NA                          |
| R01_cb15537_c4/flp0/633     | NA                      | R01_cb15537_c4/flp0/633     | R01_cb15537_c4/flp0/633  | R01_cb15537_c4/flp0/633     |
| R01_cb5331_c5/flp0/424      | R01_cb5331_c5/flp0/424  | R01_cb5331_c5/flp0/424      | R01_cb5331_c5/flp0/424   | R01_cb5331_c5/flp0/424      |
| R01_cb8564_c91928/flp0/3426 | NA                      | NA                          | NA                       | R01_cb8564_c91928/flp0/3426 |
| R01_cb1948_c1/flp0/4109     | NA                      | NA                          | NA                       | R01_cb1948_c1/flp0/4109     |
| R01_cb8564_c111464/flp0/203 | NA                      | NA                          | NA                       | R01_cb8564_c111464/flp0/203 |
| 2                           |                         |                             |                          | 2                           |
| R01_cb8564_c10353/flp0/3086 | NA                      | R01_cb8564_c10353/flp0/3086 | NA                       | NA                          |
| R01_cb12896_c5/flp0/545     | R01_cb12896_c5/flp0/545 | R01_cb12896_c5/flp0/545     | R01_cb12896_c5/flp0/545  | R01_cb12896_c5/flp0/545     |
| R01_cb3516_c7/flp0/2664     | NA                      | NA                          | NA                       | R01_cb3516_c7/flp0/2664     |

|                             |                          |                             |                             |                             |
|-----------------------------|--------------------------|-----------------------------|-----------------------------|-----------------------------|
| R01_cb3171_c29/flp0/3071    | NA                       | R01_cb3171_c29/flp0/3071    | NA                          | R01_cb3171_c29/flp0/3071    |
| R01_cb8564_c22988/flp0/2831 | NA                       | R01_cb8564_c22988/flp0/2831 | NA                          | NA                          |
| R01_cb14560_c10/f6p0/844    | NA                       | NA                          | NA                          | R01_cb14560_c10/f6p0/844    |
| R01_cb8564_c88915/flp0/2486 | NA                       | R01_cb8564_c88915/flp0/2486 | NA                          | NA                          |
| R01_cb5815_c6/flp0/2548     | NA                       | R01_cb5815_c6/flp0/2548     | NA                          | NA                          |
| R01_cb5158_c1/f2p0/1308     | NA                       | NA                          | R01_cb5158_c1/f2p0/1308     | R01_cb5158_c1/f2p0/1308     |
| R01_cb17654_c1/flp1/382     | R01_cb17654_c1/flp1/382  | R01_cb17654_c1/flp1/382     | R01_cb17654_c1/flp1/382     | R01_cb17654_c1/flp1/382     |
| R01_cb8298_c2/flp1/2328     | R01_cb8298_c2/flp1/2328  | R01_cb8298_c2/flp1/2328     | R01_cb8298_c2/flp1/2328     | R01_cb8298_c2/flp1/2328     |
| R01_cb11140_c1/flp0/4513    | R01_cb11140_c1/flp0/4513 | R01_cb11140_c1/flp0/4513    | R01_cb11140_c1/flp0/4513    | R01_cb11140_c1/flp0/4513    |
| R01_cb3972_c1/flp0/3475     | NA                       | R01_cb3972_c1/flp0/3475     | NA                          | NA                          |
| R01_cb8564_c71065/flp0/2706 | NA                       | R01_cb8564_c71065/flp0/2706 | NA                          | NA                          |
| R01_cb10628_c1/flp0/2324    | NA                       | R01_cb10628_c1/flp0/2324    | NA                          | R01_cb10628_c1/flp0/2324    |
| R01_cb16191_c5/flp0/1779    | NA                       | NA                          | NA                          | R01_cb16191_c5/flp0/1779    |
| R01_cb4117_c7/flp0/1706     | NA                       | NA                          | NA                          | R01_cb4117_c7/flp0/1706     |
| R01_cb260_c3/flp1/4897      | NA                       | NA                          | NA                          | R01_cb260_c3/flp1/4897      |
| R01_cb8564_c121319/flp0/249 | NA                       | R01_cb8564_c121319/flp0/249 | R01_cb8564_c121319/flp0/249 | R01_cb8564_c121319/flp0/249 |
| 5                           | NA                       | 5                           | 5                           | 5                           |
| R01_cb11429_c1/flp0/914     | NA                       | NA                          | NA                          | R01_cb11429_c1/flp0/914     |
| R01_cb13283_c3/flp2/1684    | NA                       | NA                          | NA                          | R01_cb13283_c3/flp2/1684    |
| R01_cb17386_c0/f2p0/609     | R01_cb17386_c0/f2p0/609  | R01_cb17386_c0/f2p0/609     | R01_cb17386_c0/f2p0/609     | R01_cb17386_c0/f2p0/609     |
| R01_cb14358_c0/flp0/643     | NA                       | NA                          | NA                          | R01_cb14358_c0/flp0/643     |
| R01_cb11463_c0/flp0/572     | NA                       | R01_cb11463_c0/flp0/572     | NA                          | NA                          |
| R01_cb8564_c112582/flp0/237 | NA                       | R01_cb8564_c112582/flp0/237 | NA                          | R01_cb8564_c112582/flp0/237 |
| 5                           | NA                       | 5                           | NA                          | 5                           |
| R01_cb1686_c13/flp0/975     | R01_cb1686_c13/flp0/975  | NA                          | R01_cb1686_c13/flp0/975     | R01_cb1686_c13/flp0/975     |
| R01_cb17973_c13/flp0/676    | R01_cb17973_c13/flp0/676 | R01_cb17973_c13/flp0/676    | R01_cb17973_c13/flp0/676    | NA                          |

|                                  |                            |                            |                          |                                  |
|----------------------------------|----------------------------|----------------------------|--------------------------|----------------------------------|
| R01_cb10587_c4/flp0/802          | R01_cb10587_c4/flp0/802    | R01_cb10587_c4/flp0/802    | R01_cb10587_c4/flp0/802  | R01_cb10587_c4/flp0/802          |
| R01_cb7659_c1/flp0/2433          | NA                         | R01_cb7659_c1/flp0/2433    | R01_cb7659_c1/flp0/2433  | R01_cb7659_c1/flp0/2433          |
| R01_cb15299_c2/flp0/654          | R01_cb15299_c2/flp0/654    | R01_cb15299_c2/flp0/654    | R01_cb15299_c2/flp0/654  | NA                               |
| R01_cb18195_c0/f2p0/873          | R01_cb18195_c0/f2p0/873    | R01_cb18195_c0/f2p0/873    | R01_cb18195_c0/f2p0/873  | R01_cb18195_c0/f2p0/873          |
| R01_cb8564_c5300/flp0/3199       | R01_cb8564_c5300/flp0/3199 | R01_cb8564_c5300/flp0/3199 | NA                       | NA                               |
| R01_cb16192_c0/f3p0/1335         | NA                         | NA                         | NA                       | R01_cb16192_c0/f3p0/1335         |
| R01_cb8085_c34/flp0/436          | R01_cb8085_c34/flp0/436    | R01_cb8085_c34/flp0/436    | R01_cb8085_c34/flp0/436  | R01_cb8085_c34/flp0/436          |
| R01_cb15104_c0/flp0/863          | NA                         | NA                         | NA                       | R01_cb15104_c0/flp0/863          |
| R01_cb13884_c12/flp0/774         | R01_cb13884_c12/flp0/774   | NA                         | R01_cb13884_c12/flp0/774 | R01_cb13884_c12/flp0/774         |
| R01_cb12577_c24/flp1/929         | NA                         | NA                         | NA                       | R01_cb12577_c24/flp1/929         |
| R01_cb1301_c2/flp0/2816          | NA                         | NA                         | NA                       | R01_cb1301_c2/flp0/2816          |
| R01_cb17053_c2/f2p0/606          | NA                         | R01_cb17053_c2/f2p0/606    | NA                       | R01_cb17053_c2/f2p0/606          |
| R01_cb13134_c11/f13p0/1303       | NA                         | NA                         | NA                       | R01_cb13134_c11/f13p0/1303       |
| R01_cb14179_c1/f2p1/606          | NA                         | NA                         | NA                       | R01_cb14179_c1/f2p1/606          |
| R01_cb10918_c0/f2p0/1762         | NA                         | NA                         | NA                       | R01_cb10918_c0/f2p0/1762         |
| R01_cb2854_c23/flp0/2438         | NA                         | R01_cb2854_c23/flp0/2438   | NA                       | NA                               |
| R01_cb8564_c14972/flp0/2171      | NA                         | NA                         | NA                       | R01_cb8564_c14972/flp0/2171      |
| R01_cb6627_c1/flp0/2322          | NA                         | R01_cb6627_c1/flp0/2322    | NA                       | NA                               |
| R01_cb8564_c3851/flp0/3843       | NA                         | NA                         | NA                       | R01_cb8564_c3851/flp0/3843       |
| R01_cb9993_c10/flp0/1028         | NA                         | NA                         | NA                       | R01_cb9993_c10/flp0/1028         |
| R01_cb8564_c109277/f6p2/204<br>6 | NA                         | NA                         | NA                       | R01_cb8564_c109277/f6p2/204<br>6 |
| R01_cb10635_c1/flp0/2867         | R01_cb10635_c1/flp0/2867   | R01_cb10635_c1/flp0/2867   | NA                       | NA                               |
| R01_cb14997_c1/flp0/789          | NA                         | R01_cb14997_c1/flp0/789    | NA                       | NA                               |
| R01_cb13953_c34/flp0/904         | NA                         | R01_cb13953_c34/flp0/904   | NA                       | NA                               |
| R01_cb14971_c6/flp0/1435         | R01_cb14971_c6/flp0/1435   | NA                         | NA                       | R01_cb14971_c6/flp0/1435         |

|                              |                             |                              |                          |                              |
|------------------------------|-----------------------------|------------------------------|--------------------------|------------------------------|
| R01_cb9713_c2/flp0/1862      | R01_cb9713_c2/flp0/1862     | R01_cb9713_c2/flp0/1862      | NA                       | NA                           |
| R01_cb6989_c2/flp0/2658      | NA                          | R01_cb6989_c2/flp0/2658      | NA                       | NA                           |
| R01_cb8564_c73940/flp0/2228  | NA                          | R01_cb8564_c73940/flp0/2228  | NA                       | NA                           |
| R01_cb8564_c73163/flp0/2503  | NA                          | R01_cb8564_c73163/flp0/2503  | NA                       | NA                           |
| R01_cb13217_c2/f2p0/1110     | NA                          | R01_cb13217_c2/f2p0/1110     | R01_cb13217_c2/f2p0/1110 | R01_cb13217_c2/f2p0/1110     |
| R01_cb422_c6/flp0/7951       | NA                          | NA                           | NA                       | R01_cb422_c6/flp0/7951       |
| R01_cb14426_c4/flp0/596      | R01_cb14426_c4/flp0/596     | R01_cb14426_c4/flp0/596      | R01_cb14426_c4/flp0/596  | R01_cb14426_c4/flp0/596      |
| R01_cb8564_c112902/flp1/4489 | NA                          | R01_cb8564_c112902/flp1/4489 | NA                       | NA                           |
| R01_cb9520_c2/flp0/1936      | NA                          | R01_cb9520_c2/flp0/1936      | R01_cb9520_c2/flp0/1936  | R01_cb9520_c2/flp0/1936      |
| R01_cb14524_c8/flp0/1159     | NA                          | NA                           | NA                       | R01_cb14524_c8/flp0/1159     |
| R01_cb454_c22/flp0/2434      | NA                          | NA                           | NA                       | R01_cb454_c22/flp0/2434      |
| R01_cb12503_c7/flp0/1197     | R01_cb12503_c7/flp0/1197    | R01_cb12503_c7/flp0/1197     | NA                       | NA                           |
| R01_cb8564_c21230/f2p0/3496  | R01_cb8564_c21230/f2p0/3496 | R01_cb8564_c21230/f2p0/3496  | NA                       | NA                           |
| R01_cb8564_c112596/flp1/2137 | NA                          | R01_cb8564_c112596/flp1/2137 | NA                       | NA                           |
| R01_cb8564_c113554/flp0/2949 | NA                          | R01_cb8564_c113554/flp0/2949 | NA                       | R01_cb8564_c113554/flp0/2949 |
| R01_cb15537_c1/flp0/713      | NA                          | R01_cb15537_c1/flp0/713      | R01_cb15537_c1/flp0/713  | R01_cb15537_c1/flp0/713      |
| R01_cb8564_c3519/flp0/2826   | R01_cb8564_c3519/flp0/2826  | R01_cb8564_c3519/flp0/2826   | NA                       | NA                           |
| R01_cb13033_c3/flp0/844      | NA                          | R01_cb13033_c3/flp0/844      | R01_cb13033_c3/flp0/844  | R01_cb13033_c3/flp0/844      |
| R01_cb2926_c14/flp0/3432     | NA                          | R01_cb2926_c14/flp0/3432     | NA                       | NA                           |
| R01_cb4738_c6/flp1/1674      | NA                          | R01_cb4738_c6/flp1/1674      | NA                       | NA                           |
| R01_cb15744_c4/flp0/1789     | NA                          | R01_cb15744_c4/flp0/1789     | NA                       | R01_cb15744_c4/flp0/1789     |
| R01_cb11049_c2/flp0/1962     | NA                          | NA                           | NA                       | R01_cb11049_c2/flp0/1962     |

|                             |                                  |                             |                             |                             |
|-----------------------------|----------------------------------|-----------------------------|-----------------------------|-----------------------------|
| R01_cb1822_c3/f1p1/3787     | NA                               | NA                          | NA                          | R01_cb1822_c3/f1p1/3787     |
| R01_cb10817_c2/f1p0/1000    | NA                               | NA                          | NA                          | R01_cb10817_c2/f1p0/1000    |
| R01_cb15940_c0/f3p0/691     | R01_cb15940_c0/f3p0/691          | NA                          | R01_cb15940_c0/f3p0/691     | R01_cb15940_c0/f3p0/691     |
| R01_cb12577_c1/f2p2/959     | NA                               | NA                          | NA                          | R01_cb12577_c1/f2p2/959     |
| R01_cb16065_c0/f1p0/396     | R01_cb16065_c0/f1p0/396          | R01_cb16065_c0/f1p0/396     | R01_cb16065_c0/f1p0/396     | R01_cb16065_c0/f1p0/396     |
| R01_cb12165_c22/f1p0/415    | R01_cb12165_c22/f1p0/415         | R01_cb12165_c22/f1p0/415    | R01_cb12165_c22/f1p0/415    | R01_cb12165_c22/f1p0/415    |
| R01_cb12743_c1/f3p0/1017    | NA                               | NA                          | NA                          | R01_cb12743_c1/f3p0/1017    |
| R01_cb10843_c3/f2p0/872     | NA                               | NA                          | NA                          | R01_cb10843_c3/f2p0/872     |
| R01_cb5540_c6/f1p0/3242     | NA                               | R01_cb5540_c6/f1p0/3242     | NA                          | NA                          |
| R01_cb16137_c4/f4p0/1348    | NA                               | NA                          | NA                          | R01_cb16137_c4/f4p0/1348    |
| R01_cb4471_c6/f1p1/3051     | NA                               | NA                          | NA                          | R01_cb4471_c6/f1p1/3051     |
| R01_cb6121_c1/f2p0/2872     | NA                               | R01_cb6121_c1/f2p0/2872     | NA                          | NA                          |
| R01_cb7484_c3/f1p0/2926     | NA                               | R01_cb7484_c3/f1p0/2926     | NA                          | R01_cb7484_c3/f1p0/2926     |
| R01_cb8564_c51420/f1p1/3936 | NA                               | NA                          | NA                          | R01_cb8564_c51420/f1p1/3936 |
| R01_cb18045_c1/f1p0/528     | NA                               | R01_cb18045_c1/f1p0/528     | NA                          | R01_cb18045_c1/f1p0/528     |
| R01_cb15060_c3/f1p0/1224    | NA                               | NA                          | NA                          | R01_cb15060_c3/f1p0/1224    |
| R01_cb5565_c71/f1p0/3162    | R01_cb5565_c71/f1p0/3162         | R01_cb5565_c71/f1p0/3162    | R01_cb5565_c71/f1p0/3162    | R01_cb5565_c71/f1p0/3162    |
| R01_cb8564_c49159/f1p0/2101 | R01_cb8564_c49159/f1p0/2101<br>1 | R01_cb8564_c49159/f1p0/2101 | R01_cb8564_c49159/f1p0/2101 | R01_cb8564_c49159/f1p0/2101 |
| R01_cb13488_c11/f6p1/814    | NA                               | NA                          | NA                          | R01_cb13488_c11/f6p1/814    |
| R01_cb14761_c0/f3p0/704     | R01_cb14761_c0/f3p0/704          | R01_cb14761_c0/f3p0/704     | R01_cb14761_c0/f3p0/704     | R01_cb14761_c0/f3p0/704     |
| R01_cb8564_c44941/f1p0/4540 | NA                               | R01_cb8564_c44941/f1p0/4540 | NA                          | NA                          |
| R01_cb18456_c7250/f1p0/589  | NA                               | NA                          | NA                          | R01_cb18456_c7250/f1p0/589  |
| R01_cb17565_c3/f1p0/1593    | R01_cb17565_c3/f1p0/1593         | R01_cb17565_c3/f1p0/1593    | NA                          | NA                          |
| R01_cb16034_c0/f2p0/411     | R01_cb16034_c0/f2p0/411          | R01_cb16034_c0/f2p0/411     | R01_cb16034_c0/f2p0/411     | R01_cb16034_c0/f2p0/411     |
| R01_cb11287_c4/f1p0/762     | NA                               | NA                          | NA                          | R01_cb11287_c4/f1p0/762     |

|                             |                             |                             |                            |                             |
|-----------------------------|-----------------------------|-----------------------------|----------------------------|-----------------------------|
| R01_cb8564_c72011/flp0/2524 | R01_cb8564_c72011/flp0/2524 | R01_cb8564_c72011/flp0/2524 | NA                         | R01_cb8564_c72011/flp0/2524 |
| R01_cb5745_c11/flp0/1408    | NA                          | NA                          | NA                         | R01_cb5745_c11/flp0/1408    |
| R01_cb10024_c510/flp0/626   | R01_cb10024_c510/flp0/626   | NA                          | R01_cb10024_c510/flp0/626  | R01_cb10024_c510/flp0/626   |
| R01_cb11630_c1/flp0/3027    | NA                          | R01_cb11630_c1/flp0/3027    | R01_cb11630_c1/flp0/3027   | R01_cb11630_c1/flp0/3027    |
| R01_cb8564_c15292/flp0/2336 | NA                          | R01_cb8564_c15292/flp0/2336 | NA                         | NA                          |
| R01_cb14955_c3/flp1/1130    | NA                          | NA                          | NA                         | R01_cb14955_c3/flp1/1130    |
| R01_cb4411_c16/flp0/2254    | NA                          | R01_cb4411_c16/flp0/2254    | R01_cb4411_c16/flp0/2254   | R01_cb4411_c16/flp0/2254    |
| R01_cb12515_c14/flp0/640    | R01_cb12515_c14/flp0/640    | R01_cb12515_c14/flp0/640    | R01_cb12515_c14/flp0/640   | R01_cb12515_c14/flp0/640    |
| R01_cb13433_c96/flp0/971    | R01_cb13433_c96/flp0/971    | R01_cb13433_c96/flp0/971    | R01_cb13433_c96/flp0/971   | NA                          |
| R01_cb3774_c24/flp0/2226    | NA                          | NA                          | NA                         | R01_cb3774_c24/flp0/2226    |
| R01_cb6529_c2/flp0/2832     | NA                          | NA                          | NA                         | R01_cb6529_c2/flp0/2832     |
| R01_cb4524_c18/flp0/315     | R01_cb4524_c18/flp0/315     | R01_cb4524_c18/flp0/315     | R01_cb4524_c18/flp0/315    | R01_cb4524_c18/flp0/315     |
| R01_cb10423_c5/flp0/1989    | NA                          | R01_cb10423_c5/flp0/1989    | NA                         | NA                          |
| R01_cb260_c26/flp0/5382     | NA                          | NA                          | NA                         | R01_cb260_c26/flp0/5382     |
| R01_cb17583_c1/flp0/1788    | NA                          | NA                          | NA                         | R01_cb17583_c1/flp0/1788    |
| R01_cb16996_c2/flp0/446     | NA                          | R01_cb16996_c2/flp0/446     | R01_cb16996_c2/flp0/446    | R01_cb16996_c2/flp0/446     |
| R01_cb8564_c79500/flp0/4029 | NA                          | NA                          | NA                         | R01_cb8564_c79500/flp0/4029 |
| R01_cb1388_c10/flp2/4356    | NA                          | NA                          | NA                         | R01_cb1388_c10/flp2/4356    |
| R01_cb13696_c1/flp0/1166    | NA                          | NA                          | NA                         | R01_cb13696_c1/flp0/1166    |
| R01_cb8102_c17/flp0/1782    | NA                          | R01_cb8102_c17/flp0/1782    | NA                         | R01_cb8102_c17/flp0/1782    |
| R01_cb8785_c6/flp0/2187     | NA                          | NA                          | NA                         | R01_cb8785_c6/flp0/2187     |
| R01_cb12579_c19/f49p3/975   | R01_cb12579_c19/f49p3/975   | R01_cb12579_c19/f49p3/975   | R01_cb12579_c19/f49p3/975  | R01_cb12579_c19/f49p3/975   |
| R01_cb872_c1/flp0/4457      | NA                          | NA                          | NA                         | R01_cb872_c1/flp0/4457      |
| R01_cb5643_c112/flp0/1970   | NA                          | R01_cb5643_c112/flp0/1970   | NA                         | NA                          |
| R01_cb18456_c1341/f4p0/621  | R01_cb18456_c1341/f4p0/621  | R01_cb18456_c1341/f4p0/621  | R01_cb18456_c1341/f4p0/621 | R01_cb18456_c1341/f4p0/621  |



|                             |                             |                             |                             |                             |
|-----------------------------|-----------------------------|-----------------------------|-----------------------------|-----------------------------|
| R01_cb13287_c2/f6p0/537     | NA                          | R01_cb13287_c2/f6p0/537     | NA                          | R01_cb13287_c2/f6p0/537     |
| R01_cb2352_c10/flp0/3308    | NA                          | R01_cb2352_c10/flp0/3308    | R01_cb2352_c10/flp0/3308    | R01_cb2352_c10/flp0/3308    |
| R01_cb18727_c2/flp0/2155    | NA                          | NA                          | R01_cb18727_c2/flp0/2155    | R01_cb18727_c2/flp0/2155    |
| R01_cb302_c3/f2p0/2680      | NA                          | NA                          | NA                          | R01_cb302_c3/f2p0/2680      |
| R01_cb2875_c21/flp1/3307    | NA                          | NA                          | NA                          | R01_cb2875_c21/flp1/3307    |
| R01_cb15465_c0/f2p2/523     | R01_cb15465_c0/f2p2/523     | NA                          | R01_cb15465_c0/f2p2/523     | R01_cb15465_c0/f2p2/523     |
| R01_cb2715_c3/flp0/1560     | NA                          | R01_cb2715_c3/flp0/1560     | NA                          | NA                          |
| R01_cb8564_c79363/flp0/1977 | NA                          | R01_cb8564_c79363/flp0/1977 | NA                          | NA                          |
| R01_cb8564_c15990/flp0/4062 | NA                          | R01_cb8564_c15990/flp0/4062 | NA                          | NA                          |
| R01_cb17371_c0/flp0/727     | NA                          | R01_cb17371_c0/flp0/727     | R01_cb17371_c0/flp0/727     | R01_cb17371_c0/flp0/727     |
| R01_cb8564_c75651/flp0/1934 | R01_cb8564_c75651/flp0/1934 | R01_cb8564_c75651/flp0/1934 | R01_cb8564_c75651/flp0/1934 | R01_cb8564_c75651/flp0/1934 |
| R01_cb8564_c50128/flp0/4343 | NA                          | NA                          | NA                          | R01_cb8564_c50128/flp0/4343 |
| R01_cb4338_c4/flp0/2505     | NA                          | R01_cb4338_c4/flp0/2505     | NA                          | R01_cb4338_c4/flp0/2505     |
| R01_cb16613_c1/flp0/1655    | NA                          | R01_cb16613_c1/flp0/1655    | NA                          | R01_cb16613_c1/flp0/1655    |
| R01_cb11263_c1/flp0/2587    | NA                          | R01_cb11263_c1/flp0/2587    | NA                          | NA                          |
| R01_cb12444_c51/flp0/758    | R01_cb12444_c51/flp0/758    | R01_cb12444_c51/flp0/758    | R01_cb12444_c51/flp0/758    | R01_cb12444_c51/flp0/758    |
| R01_cb1097_c0/f3p0/3913     | NA                          | NA                          | NA                          | R01_cb1097_c0/f3p0/3913     |
| R01_cb1228_c15/flp0/2516    | NA                          | NA                          | NA                          | R01_cb1228_c15/flp0/2516    |
| R01_cb8564_c12758/flp0/2368 | NA                          | NA                          | NA                          | R01_cb8564_c12758/flp0/2368 |
| R01_cb13724_c2/flp2/533     | NA                          | NA                          | R01_cb13724_c2/flp2/533     | R01_cb13724_c2/flp2/533     |
| R01_cb15712_c1/flp0/551     | NA                          | NA                          | NA                          | R01_cb15712_c1/flp0/551     |
| R01_cb3578_c9/flp0/1757     | NA                          | R01_cb3578_c9/flp0/1757     | NA                          | R01_cb3578_c9/flp0/1757     |
| R01_cb18303_c0/flp0/546     | NA                          | R01_cb18303_c0/flp0/546     | NA                          | R01_cb18303_c0/flp0/546     |
| R01_cb8564_c124837/flp0/208 | NA                          | R01_cb8564_c124837/flp0/208 | NA                          | NA                          |
| 5                           |                             | 5                           |                             |                             |

|                             |                         |                             |                             |                             |
|-----------------------------|-------------------------|-----------------------------|-----------------------------|-----------------------------|
| R01_cb15934_c3/flp0/777     | NA                      | R01_cb15934_c3/flp0/777     | NA                          | R01_cb15934_c3/flp0/777     |
| R01_cb13686_c13/flp0/1157   | NA                      | R01_cb13686_c13/flp0/1157   | NA                          | NA                          |
| R01_cb8564_c3739/f3p2/2520  | NA                      | NA                          | NA                          | R01_cb8564_c3739/f3p2/2520  |
| R01_cb6974_c0/flp0/2726     | NA                      | R01_cb6974_c0/flp0/2726     | NA                          | R01_cb6974_c0/flp0/2726     |
| R01_cb8322_c1/flp0/2109     | NA                      | NA                          | NA                          | R01_cb8322_c1/flp0/2109     |
| R01_cb6875_c9/flp0/1845     | NA                      | R01_cb6875_c9/flp0/1845     | NA                          | NA                          |
| R01_cb4649_c0/flp0/3217     | NA                      | NA                          | NA                          | R01_cb4649_c0/flp0/3217     |
| R01_cb8564_c75742/flp0/4694 | NA                      | R01_cb8564_c75742/flp0/4694 | NA                          | NA                          |
| R01_cb13746_c0/f6p1/450     | R01_cb13746_c0/f6p1/450 | R01_cb13746_c0/f6p1/450     | NA                          | NA                          |
| R01_cb15326_c1/flp0/1838    | NA                      | R01_cb15326_c1/flp0/1838    | R01_cb15326_c1/flp0/1838    | R01_cb15326_c1/flp0/1838    |
| R01_cb9808_c5/flp0/1886     | NA                      | R01_cb9808_c5/flp0/1886     | NA                          | NA                          |
| R01_cb16606_c6/flp0/445     | R01_cb16606_c6/flp0/445 | R01_cb16606_c6/flp0/445     | NA                          | R01_cb16606_c6/flp0/445     |
| R01_cb16532_c0/f4p0/549     | NA                      | R01_cb16532_c0/f4p0/549     | NA                          | NA                          |
| R01_cb10015_c314/flp0/591   | NA                      | R01_cb10015_c314/flp0/591   | NA                          | NA                          |
| R01_cb18456_c2544/flp0/1197 | NA                      | NA                          | NA                          | R01_cb18456_c2544/flp0/1197 |
| R01_cb2997_c6/flp0/3552     | NA                      | NA                          | NA                          | R01_cb2997_c6/flp0/3552     |
| R01_cb16736_c2/flp1/950     | NA                      | R01_cb16736_c2/flp1/950     | NA                          | NA                          |
| R01_cb8279_c1/f2p0/2077     | NA                      | NA                          | NA                          | R01_cb8279_c1/f2p0/2077     |
| R01_cb2769_c4/flp0/2801     | NA                      | R01_cb2769_c4/flp0/2801     | NA                          | NA                          |
| R01_cb684_c1/flp0/3859      | NA                      | NA                          | NA                          | R01_cb684_c1/flp0/3859      |
| R01_cb2845_c34/flp0/3557    | NA                      | NA                          | NA                          | R01_cb2845_c34/flp0/3557    |
| R01_cb8779_c9/flp0/3643     | NA                      | NA                          | NA                          | R01_cb8779_c9/flp0/3643     |
| R01_cb5007_c7/flp0/2427     | NA                      | R01_cb5007_c7/flp0/2427     | NA                          | NA                          |
| R01_cb8564_c91116/flp0/3098 | NA                      | R01_cb8564_c91116/flp0/3098 | NA                          | NA                          |
| R01_cb8564_c92144/flp1/2528 | NA                      | R01_cb8564_c92144/flp1/2528 | R01_cb8564_c92144/flp1/2528 | R01_cb8564_c92144/flp1/2528 |
| R01_cb709_c6/flp0/2450      | NA                      | R01_cb709_c6/flp0/2450      | R01_cb709_c6/flp0/2450      | R01_cb709_c6/flp0/2450      |

|                              |                            |                             |                             |                              |
|------------------------------|----------------------------|-----------------------------|-----------------------------|------------------------------|
| R01_cb8564_c109800/f6p1/3270 | NA                         | NA                          | NA                          | R01_cb8564_c109800/f6p1/3270 |
| R01_cb16110_c2/f1p0/910      | NA                         | R01_cb16110_c2/f1p0/910     | NA                          | R01_cb16110_c2/f1p0/910      |
| R01_cb11823_c1/f1p0/2012     | R01_cb11823_c1/f1p0/2012   | R01_cb11823_c1/f1p0/2012    | R01_cb11823_c1/f1p0/2012    | R01_cb11823_c1/f1p0/2012     |
| R01_cb6779_c4/f1p1/1903      | NA                         | NA                          | NA                          | R01_cb6779_c4/f1p1/1903      |
| R01_cb12443_c8/f1p0/480      | R01_cb12443_c8/f1p0/480    | R01_cb12443_c8/f1p0/480     | R01_cb12443_c8/f1p0/480     | R01_cb12443_c8/f1p0/480      |
| R01_cb8564_c13431/f1p0/3551  | NA                         | R01_cb8564_c13431/f1p0/3551 | R01_cb8564_c13431/f1p0/3551 | R01_cb8564_c13431/f1p0/3551  |
| R01_cb8564_c49958/f1p0/3088  | NA                         | R01_cb8564_c49958/f1p0/3088 | NA                          | NA                           |
| R01_cb14634_c58/f1p0/2616    | NA                         | R01_cb14634_c58/f1p0/2616   | NA                          | NA                           |
| R01_cb15346_c3/f3p2/764      | NA                         | NA                          | R01_cb15346_c3/f3p2/764     | R01_cb15346_c3/f3p2/764      |
| R01_cb295_c32/f1p2/2147      | NA                         | R01_cb295_c32/f1p2/2147     | NA                          | NA                           |
| R01_cb2378_c21/f1p0/3447     | NA                         | NA                          | NA                          | R01_cb2378_c21/f1p0/3447     |
| R01_cb15959_c3/f1p0/591      | NA                         | R01_cb15959_c3/f1p0/591     | NA                          | R01_cb15959_c3/f1p0/591      |
| R01_cb1915_c44/f1p0/832      | NA                         | R01_cb1915_c44/f1p0/832     | NA                          | NA                           |
| R01_cb8564_c7830/f2p0/2010   | R01_cb8564_c7830/f2p0/2010 | R01_cb8564_c7830/f2p0/2010  | R01_cb8564_c7830/f2p0/2010  | R01_cb8564_c7830/f2p0/2010   |
| R01_cb18456_c2538/f1p0/1445  | NA                         | NA                          | NA                          | R01_cb18456_c2538/f1p0/1445  |
| R01_cb3848_c18/f1p1/3165     | NA                         | NA                          | NA                          | R01_cb3848_c18/f1p1/3165     |
| R01_cb18485_c1/f1p0/476      | R01_cb18485_c1/f1p0/476    | R01_cb18485_c1/f1p0/476     | NA                          | R01_cb18485_c1/f1p0/476      |
| R01_cb8564_c4497/f1p1/2337   | NA                         | R01_cb8564_c4497/f1p1/2337  | R01_cb8564_c4497/f1p1/2337  | R01_cb8564_c4497/f1p1/2337   |
| R01_cb9793_c3/f1p1/1975      | NA                         | NA                          | NA                          | R01_cb9793_c3/f1p1/1975      |
| R01_cb4762_c2/f1p0/3400      | NA                         | R01_cb4762_c2/f1p0/3400     | NA                          | NA                           |
| R01_cb8564_c20845/f1p0/3839  | NA                         | R01_cb8564_c20845/f1p0/3839 | NA                          | NA                           |
| R01_cb5896_c139/f1p0/4158    | NA                         | R01_cb5896_c139/f1p0/4158   | NA                          | NA                           |
| R01_cb14226_c1/f1p0/757      | NA                         | NA                          | R01_cb14226_c1/f1p0/757     | R01_cb14226_c1/f1p0/757      |
| R01_cb17358_c0/f1p0/1368     | NA                         | NA                          | NA                          | R01_cb17358_c0/f1p0/1368     |
| R01_cb8564_c23368/f1p0/2544  | NA                         | R01_cb8564_c23368/f1p0/2544 | NA                          | NA                           |

|                              |                             |                              |                             |                             |
|------------------------------|-----------------------------|------------------------------|-----------------------------|-----------------------------|
| R01_cb14231_c6/flp0/1169     | NA                          | R01_cb14231_c6/flp0/1169     | NA                          | NA                          |
| R01_cb11107_c6/flp0/4998     | NA                          | R01_cb11107_c6/flp0/4998     | NA                          | NA                          |
| R01_cb2451_c23/f4p2/3389     | NA                          | NA                           | NA                          | R01_cb2451_c23/f4p2/3389    |
| R01_cb18456_c6904/flp0/504   | R01_cb18456_c6904/flp0/504  | R01_cb18456_c6904/flp0/504   | NA                          | R01_cb18456_c6904/flp0/504  |
| R01_cb16070_c0/flp0/1512     | NA                          | NA                           | NA                          | R01_cb16070_c0/flp0/1512    |
| R01_cb14846_c0/flp0/1147     | NA                          | R01_cb14846_c0/flp0/1147     | R01_cb14846_c0/flp0/1147    | R01_cb14846_c0/flp0/1147    |
| R01_cb11248_c2/flp0/3966     | NA                          | R01_cb11248_c2/flp0/3966     | R01_cb11248_c2/flp0/3966    | NA                          |
| R01_cb8564_c51432/flp0/2855  | R01_cb8564_c51432/flp0/2855 | R01_cb8564_c51432/flp0/2855  | R01_cb8564_c51432/flp0/2855 | R01_cb8564_c51432/flp0/2855 |
| R01_cb16451_c0/f2p0/1367     | NA                          | NA                           | NA                          | R01_cb16451_c0/f2p0/1367    |
| R01_cb9797_c61/flp0/2920     | NA                          | NA                           | NA                          | R01_cb9797_c61/flp0/2920    |
| R01_cb7776_c24/flp1/1975     | NA                          | NA                           | NA                          | R01_cb7776_c24/flp1/1975    |
| R01_cb16426_c4/flp0/333      | R01_cb16426_c4/flp0/333     | R01_cb16426_c4/flp0/333      | R01_cb16426_c4/flp0/333     | R01_cb16426_c4/flp0/333     |
| R01_cb16442_c0/f2p0/1405     | NA                          | R01_cb16442_c0/f2p0/1405     | R01_cb16442_c0/f2p0/1405    | R01_cb16442_c0/f2p0/1405    |
| R01_cb12714_c44/flp0/666     | NA                          | R01_cb12714_c44/flp0/666     | R01_cb12714_c44/flp0/666    | R01_cb12714_c44/flp0/666    |
| R01_cb8205_c13/flp0/2089     | NA                          | R01_cb8205_c13/flp0/2089     | NA                          | NA                          |
| R01_cb1972_c6/flp1/3771      | NA                          | NA                           | NA                          | R01_cb1972_c6/flp1/3771     |
| R01_cb9105_c4/flp1/2503      | R01_cb9105_c4/flp1/2503     | R01_cb9105_c4/flp1/2503      | R01_cb9105_c4/flp1/2503     | R01_cb9105_c4/flp1/2503     |
| R01_cb8564_c113842/flp0/1982 | NA                          | R01_cb8564_c113842/flp0/1982 | NA                          | NA                          |
| R01_cb18456_c4730/flp2/491   | NA                          | NA                           | NA                          | R01_cb18456_c4730/flp2/491  |
| R01_cb6121_c11/flp0/2005     | NA                          | R01_cb6121_c11/flp0/2005     | NA                          | R01_cb6121_c11/flp0/2005    |
| R01_cb16520_c2/flp0/1071     | NA                          | NA                           | NA                          | R01_cb16520_c2/flp0/1071    |
| R01_cb18456_c1513/f3p0/459   | R01_cb18456_c1513/f3p0/459  | R01_cb18456_c1513/f3p0/459   | R01_cb18456_c1513/f3p0/459  | R01_cb18456_c1513/f3p0/459  |
| R01_cb14647_c3/f2p0/1563     | NA                          | NA                           | NA                          | R01_cb14647_c3/f2p0/1563    |
| R01_cb12204_c6/f7p0/1219     | R01_cb12204_c6/f7p0/1219    | R01_cb12204_c6/f7p0/1219     | R01_cb12204_c6/f7p0/1219    | R01_cb12204_c6/f7p0/1219    |

|                              |                              |                              |                              |                              |
|------------------------------|------------------------------|------------------------------|------------------------------|------------------------------|
| R01_cb17299_c0/flp0/1077     | NA                           | NA                           | NA                           | R01_cb17299_c0/flp0/1077     |
| R01_cb1779_c8/flp0/2872      | NA                           | NA                           | NA                           | R01_cb1779_c8/flp0/2872      |
| R01_cb8564_c117051/flp0/2397 | R01_cb8564_c117051/flp0/2397 | R01_cb8564_c117051/flp0/2397 | R01_cb8564_c117051/flp0/2397 | R01_cb8564_c117051/flp0/2397 |
| R01_cb2729_c4/flp0/2000      | NA                           | R01_cb2729_c4/flp0/2000      | NA                           | R01_cb2729_c4/flp0/2000      |
| R01_cb15845_c1/flp0/625      | NA                           | R01_cb15845_c1/flp0/625      | NA                           | NA                           |
| R01_cb17266_c27/flp0/1588    | R01_cb17266_c27/flp0/1588    | R01_cb17266_c27/flp0/1588    | R01_cb17266_c27/flp0/1588    | R01_cb17266_c27/flp0/1588    |
| R01_cb2842_c19/flp0/2967     | NA                           | R01_cb2842_c19/flp0/2967     | NA                           | NA                           |
| R01_cb8564_c112735/flp0/2180 | NA                           | R01_cb8564_c112735/flp0/2180 | R01_cb8564_c112735/flp0/2180 | NA                           |
| R01_cb8564_c43330/flp0/3011  | NA                           | R01_cb8564_c43330/flp0/3011  | NA                           | R01_cb8564_c43330/flp0/3011  |
| R01_cb11679_c0/flp0/974      | NA                           | R01_cb11679_c0/flp0/974      | NA                           | NA                           |
| R01_cb17221_c2/f2p0/1091     | NA                           | R01_cb17221_c2/f2p0/1091     | NA                           | R01_cb17221_c2/f2p0/1091     |
| R01_cb8564_c52651/flp0/3529  | NA                           | R01_cb8564_c52651/flp0/3529  | NA                           | NA                           |
| R01_cb8564_c85766/flp0/2274  | NA                           | NA                           | NA                           | R01_cb8564_c85766/flp0/2274  |
| R01_cb16982_c0/f2p0/1397     | NA                           | NA                           | NA                           | R01_cb16982_c0/f2p0/1397     |
| R01_cb11741_c0/flp0/1246     | NA                           | R01_cb11741_c0/flp0/1246     | R01_cb11741_c0/flp0/1246     | R01_cb11741_c0/flp0/1246     |
| R01_cb8564_c81210/flp0/2478  | NA                           | R01_cb8564_c81210/flp0/2478  | NA                           | NA                           |
| R01_cb9871_c1/f4p2/762       | NA                           | R01_cb9871_c1/f4p2/762       | NA                           | NA                           |
| R01_cb16051_c4/flp0/990      | R01_cb16051_c4/flp0/990      | R01_cb16051_c4/flp0/990      | R01_cb16051_c4/flp0/990      | R01_cb16051_c4/flp0/990      |
| R01_cb15496_c0/f4p0/795      | NA                           | NA                           | NA                           | R01_cb15496_c0/f4p0/795      |
| R01_cb14619_c9/flp0/1471     | NA                           | R01_cb14619_c9/flp0/1471     | R01_cb14619_c9/flp0/1471     | R01_cb14619_c9/flp0/1471     |
| R01_cb16555_c1/flp1/733      | NA                           | NA                           | NA                           | R01_cb16555_c1/flp1/733      |
| R01_cb10218_c4/flp0/976      | NA                           | R01_cb10218_c4/flp0/976      | NA                           | NA                           |
| R01_cb13884_c2/f2p0/528      | R01_cb13884_c2/f2p0/528      | NA                           | R01_cb13884_c2/f2p0/528      | R01_cb13884_c2/f2p0/528      |
| R01_cb10960_c2/flp0/1269     | NA                           | NA                           | NA                           | R01_cb10960_c2/flp0/1269     |

|                             |                            |                             |                             |                             |
|-----------------------------|----------------------------|-----------------------------|-----------------------------|-----------------------------|
| R01_cb8564_c68286/f3p0/2248 | NA                         | R01_cb8564_c68286/f3p0/2248 | R01_cb8564_c68286/f3p0/2248 | R01_cb8564_c68286/f3p0/2248 |
| R01_cb3596_c3/f1p0/2873     | R01_cb3596_c3/f1p0/2873    | R01_cb3596_c3/f1p0/2873     | NA                          | R01_cb3596_c3/f1p0/2873     |
| R01_cb9932_c4/f1p0/615      | NA                         | R01_cb9932_c4/f1p0/615      | R01_cb9932_c4/f1p0/615      | NA                          |
| R01_cb8564_c40810/f1p0/3998 | NA                         | NA                          | NA                          | R01_cb8564_c40810/f1p0/3998 |
| R01_cb10660_c6/f1p0/392     | NA                         | R01_cb10660_c6/f1p0/392     | NA                          | R01_cb10660_c6/f1p0/392     |
| R01_cb18456_c6564/f1p0/879  | R01_cb18456_c6564/f1p0/879 | NA                          | NA                          | NA                          |
| R01_cb3863_c9/f5p0/3156     | NA                         | NA                          | NA                          | R01_cb3863_c9/f5p0/3156     |
| R01_cb16656_c0/f1p0/671     | NA                         | R01_cb16656_c0/f1p0/671     | NA                          | NA                          |
| R01_cb3840_c3/f1p0/2107     | NA                         | R01_cb3840_c3/f1p0/2107     | NA                          | NA                          |
| R01_cb10326_c4/f1p0/2046    | R01_cb10326_c4/f1p0/2046   | R01_cb10326_c4/f1p0/2046    | R01_cb10326_c4/f1p0/2046    | R01_cb10326_c4/f1p0/2046    |
| R01_cb11261_c3/f1p0/695     | NA                         | R01_cb11261_c3/f1p0/695     | R01_cb11261_c3/f1p0/695     | R01_cb11261_c3/f1p0/695     |
| R01_cb6309_c7/f1p0/634      | R01_cb6309_c7/f1p0/634     | R01_cb6309_c7/f1p0/634      | R01_cb6309_c7/f1p0/634      | R01_cb6309_c7/f1p0/634      |
| R01_cb13505_c2/f2p0/1492    | R01_cb13505_c2/f2p0/1492   | R01_cb13505_c2/f2p0/1492    | NA                          | NA                          |
| R01_cb4441_c1/f1p0/2698     | NA                         | NA                          | R01_cb4441_c1/f1p0/2698     | NA                          |
| R01_cb7392_c1/f1p0/2538     | NA                         | NA                          | NA                          | R01_cb7392_c1/f1p0/2538     |
| R01_cb8564_c86250/f1p0/3654 | NA                         | NA                          | NA                          | R01_cb8564_c86250/f1p0/3654 |
| R01_cb4657_c27/f1p0/3021    | NA                         | NA                          | NA                          | R01_cb4657_c27/f1p0/3021    |
| R01_cb7230_c1/f2p0/1276     | NA                         | R01_cb7230_c1/f2p0/1276     | NA                          | NA                          |
| R01_cb17899_c0/f1p0/680     | R01_cb17899_c0/f1p0/680    | R01_cb17899_c0/f1p0/680     | NA                          | R01_cb17899_c0/f1p0/680     |
| R01_cb11918_c11/f1p1/862    | NA                         | NA                          | NA                          | R01_cb11918_c11/f1p1/862    |
| R01_cb17838_c0/f1p0/1140    | NA                         | NA                          | R01_cb17838_c0/f1p0/1140    | NA                          |
| R01_cb2817_c3/f1p0/3142     | NA                         | R01_cb2817_c3/f1p0/3142     | NA                          | NA                          |
| R01_cb2451_c9/f1p0/3925     | NA                         | NA                          | NA                          | R01_cb2451_c9/f1p0/3925     |
| R01_cb5736_c3/f1p2/7025     | NA                         | NA                          | NA                          | R01_cb5736_c3/f1p2/7025     |
| R01_cb17013_c2/f1p0/791     | NA                         | NA                          | NA                          | R01_cb17013_c2/f1p0/791     |
| R01_cb18203_c0/f1p0/1475    | NA                         | R01_cb18203_c0/f1p0/1475    | R01_cb18203_c0/f1p0/1475    | R01_cb18203_c0/f1p0/1475    |

|                             |                             |                             |                            |                             |
|-----------------------------|-----------------------------|-----------------------------|----------------------------|-----------------------------|
| R01_cb16397_c0/flp0/796     | R01_cb16397_c0/flp0/796     | R01_cb16397_c0/flp0/796     | R01_cb16397_c0/flp0/796    | R01_cb16397_c0/flp0/796     |
| R01_cb4037_c5/flp0/1879     | NA                          | NA                          | NA                         | R01_cb4037_c5/flp0/1879     |
| R01_cb15735_c1/flp0/592     | R01_cb15735_c1/flp0/592     | R01_cb15735_c1/flp0/592     | NA                         | NA                          |
| R01_cb5808_c1/f2p0/1133     | NA                          | NA                          | NA                         | R01_cb5808_c1/f2p0/1133     |
| R01_cb11263_c0/flp0/638     | R01_cb11263_c0/flp0/638     | R01_cb11263_c0/flp0/638     | R01_cb11263_c0/flp0/638    | R01_cb11263_c0/flp0/638     |
| R01_cb17053_c4/flp0/722     | NA                          | R01_cb17053_c4/flp0/722     | NA                         | R01_cb17053_c4/flp0/722     |
| R01_cb7443_c0/flp0/2611     | NA                          | NA                          | NA                         | R01_cb7443_c0/flp0/2611     |
| R01_cb18456_c1817/flp0/1206 | R01_cb18456_c1817/flp0/1206 | R01_cb18456_c1817/flp0/1206 | NA                         | R01_cb18456_c1817/flp0/1206 |
| R01_cb6845_c36/fl1p1/2381   | NA                          | NA                          | NA                         | R01_cb6845_c36/fl1p1/2381   |
| R01_cb13938_c12/flp0/1533   | NA                          | NA                          | NA                         | R01_cb13938_c12/flp0/1533   |
| R01_cb1915_c25/flp0/1838    | NA                          | R01_cb1915_c25/flp0/1838    | NA                         | NA                          |
| R01_cb5896_c75/flp0/2348    | NA                          | R01_cb5896_c75/flp0/2348    | R01_cb5896_c75/flp0/2348   | R01_cb5896_c75/flp0/2348    |
| R01_cb8564_c71710/flp0/1983 | NA                          | R01_cb8564_c71710/flp0/1983 | NA                         | NA                          |
| R01_cb12757_c2/flp0/1113    | NA                          | NA                          | NA                         | R01_cb12757_c2/flp0/1113    |
| R01_cb6570_c1/flp0/2821     | NA                          | R01_cb6570_c1/flp0/2821     | NA                         | R01_cb6570_c1/flp0/2821     |
| R01_cb18456_c4747/flp0/430  | NA                          | R01_cb18456_c4747/flp0/430  | R01_cb18456_c4747/flp0/430 | R01_cb18456_c4747/flp0/430  |
| R01_cb15312_c4/f2p1/655     | NA                          | R01_cb15312_c4/f2p1/655     | R01_cb15312_c4/f2p1/655    | R01_cb15312_c4/f2p1/655     |
| R01_cb12336_c12/flp0/1003   | NA                          | R01_cb12336_c12/flp0/1003   | NA                         | R01_cb12336_c12/flp0/1003   |
| R01_cb17468_c1/flp0/816     | NA                          | NA                          | R01_cb17468_c1/flp0/816    | R01_cb17468_c1/flp0/816     |
| R01_cb1228_c40/flp0/2699    | NA                          | NA                          | NA                         | R01_cb1228_c40/flp0/2699    |
| R01_cb8564_c88969/flp0/2150 | NA                          | R01_cb8564_c88969/flp0/2150 | NA                         | NA                          |
| R01_cb6057_c4/flp0/1955     | NA                          | NA                          | NA                         | R01_cb6057_c4/flp0/1955     |
| R01_cb4580_c6/flp0/6353     | NA                          | NA                          | NA                         | R01_cb4580_c6/flp0/6353     |
| R01_cb8564_c75714/flp0/1945 | NA                          | R01_cb8564_c75714/flp0/1945 | NA                         | NA                          |
| R01_cb14480_c1/f2p0/810     | NA                          | NA                          | NA                         | R01_cb14480_c1/f2p0/810     |

|                              |                             |                             |                             |                              |
|------------------------------|-----------------------------|-----------------------------|-----------------------------|------------------------------|
| R01_cb2382_c7/flp0/5459      | NA                          | NA                          | NA                          | R01_cb2382_c7/flp0/5459      |
| R01_cb14547_c15/f2p1/787     | NA                          | R01_cb14547_c15/f2p1/787    | NA                          | NA                           |
| R01_cb8564_c23224/flp0/2195  | R01_cb8564_c23224/flp0/2195 | R01_cb8564_c23224/flp0/2195 | NA                          | NA                           |
| R01_cb12696_c13/flp0/572     | NA                          | R01_cb12696_c13/flp0/572    | NA                          | NA                           |
| R01_cb4094_c24/flp0/618      | NA                          | R01_cb4094_c24/flp0/618     | NA                          | NA                           |
| R01_cb10913_c0/f5p0/975      | NA                          | NA                          | NA                          | R01_cb10913_c0/f5p0/975      |
| R01_cb16867_c1/flp0/1256     | NA                          | NA                          | NA                          | R01_cb16867_c1/flp0/1256     |
| R01_cb8135_c1/flp0/2447      | NA                          | R01_cb8135_c1/flp0/2447     | NA                          | NA                           |
| R01_cb3542_c18/flp0/5167     | NA                          | R01_cb3542_c18/flp0/5167    | NA                          | NA                           |
| R01_cb5554_c8/flp0/1768      | NA                          | R01_cb5554_c8/flp0/1768     | R01_cb5554_c8/flp0/1768     | NA                           |
| R01_cb18456_c7224/f2p0/465   | R01_cb18456_c7224/f2p0/465  | R01_cb18456_c7224/f2p0/465  | R01_cb18456_c7224/f2p0/465  | R01_cb18456_c7224/f2p0/465   |
| R01_cb7096_c21/flp0/2561     | NA                          | NA                          | NA                          | R01_cb7096_c21/flp0/2561     |
| R01_cb8564_c109754/f2p0/1926 | NA                          | NA                          | NA                          | R01_cb8564_c109754/f2p0/1926 |
| R01_cb17192_c0/flp0/969      | NA                          | R01_cb17192_c0/flp0/969     | NA                          | NA                           |
| R01_cb11204_c5/flp0/1010     | NA                          | NA                          | NA                          | R01_cb11204_c5/flp0/1010     |
| R01_cb454_c19/flp0/2558      | NA                          | NA                          | NA                          | R01_cb454_c19/flp0/2558      |
| R01_cb13820_c7/flp0/1282     | R01_cb13820_c7/flp0/1282    | R01_cb13820_c7/flp0/1282    | R01_cb13820_c7/flp0/1282    | R01_cb13820_c7/flp0/1282     |
| R01_cb12641_c34/flp0/690     | NA                          | R01_cb12641_c34/flp0/690    | R01_cb12641_c34/flp0/690    | R01_cb12641_c34/flp0/690     |
| R01_cb6888_c3/flp0/1552      | NA                          | R01_cb6888_c3/flp0/1552     | NA                          | NA                           |
| R01_cb8564_c69069/f2p2/2031  | NA                          | R01_cb8564_c69069/f2p2/2031 | R01_cb8564_c69069/f2p2/2031 | R01_cb8564_c69069/f2p2/2031  |
| R01_cb8374_c4/flp0/2094      | NA                          | R01_cb8374_c4/flp0/2094     | NA                          | NA                           |
| R01_cb18456_c6834/flp0/1557  | NA                          | NA                          | NA                          | R01_cb18456_c6834/flp0/1557  |
| R01_cb2616_c1/flp0/4840      | NA                          | NA                          | NA                          | R01_cb2616_c1/flp0/4840      |
| R01_cb10133_c7/flp1/1730     | NA                          | NA                          | NA                          | R01_cb10133_c7/flp1/1730     |



|                              |                          |                             |                             |                              |
|------------------------------|--------------------------|-----------------------------|-----------------------------|------------------------------|
| R01_cb507_c6/flp0/1656       | NA                       | NA                          | NA                          | R01_cb507_c6/flp0/1656       |
| R01_cb8564_c152980/flp0/3128 | NA                       | NA                          | NA                          | R01_cb8564_c152980/flp0/3128 |
| R01_cb10337_c6/flp2/1204     | NA                       | R01_cb10337_c6/flp2/1204    | NA                          | NA                           |
| R01_cb2133_c36/flp0/2399     | NA                       | R01_cb2133_c36/flp0/2399    | NA                          | NA                           |
| R01_cb11338_c1/flp1/2802     | NA                       | R01_cb11338_c1/flp1/2802    | NA                          | R01_cb11338_c1/flp1/2802     |
| R01_cb12155_c20/flp1/1710    | NA                       | R01_cb12155_c20/flp1/1710   | NA                          | NA                           |
| R01_cb13042_c4/flp0/1356     | NA                       | R01_cb13042_c4/flp0/1356    | NA                          | NA                           |
| R01_cb7484_c5/flp0/3868      | NA                       | R01_cb7484_c5/flp0/3868     | R01_cb7484_c5/flp0/3868     | NA                           |
| R01_cb3563_c5/flp0/2705      | NA                       | NA                          | NA                          | R01_cb3563_c5/flp0/2705      |
| R01_cb10855_c0/flp0/1369     | NA                       | R01_cb10855_c0/flp0/1369    | NA                          | NA                           |
| R01_cb10543_c1/flp0/2241     | NA                       | R01_cb10543_c1/flp0/2241    | NA                          | NA                           |
| R01_cb13515_c7/flp0/1823     | NA                       | R01_cb13515_c7/flp0/1823    | NA                          | R01_cb13515_c7/flp0/1823     |
| R01_cb17118_c6/flp0/1474     | R01_cb17118_c6/flp0/1474 | R01_cb17118_c6/flp0/1474    | R01_cb17118_c6/flp0/1474    | R01_cb17118_c6/flp0/1474     |
| R01_cb365_c1/f2p1/4237       | NA                       | NA                          | NA                          | R01_cb365_c1/f2p1/4237       |
| R01_cb10303_c0/flp0/704      | R01_cb10303_c0/flp0/704  | R01_cb10303_c0/flp0/704     | R01_cb10303_c0/flp0/704     | R01_cb10303_c0/flp0/704      |
| R01_cb4652_c4/flp0/2883      | NA                       | R01_cb4652_c4/flp0/2883     | NA                          | NA                           |
| R01_cb17274_c3/flp0/1657     | NA                       | R01_cb17274_c3/flp0/1657    | R01_cb17274_c3/flp0/1657    | R01_cb17274_c3/flp0/1657     |
| R01_cb191_c15/flp1/5569      | NA                       | NA                          | NA                          | R01_cb191_c15/flp1/5569      |
| R01_cb18363_c1/flp0/766      | NA                       | NA                          | R01_cb18363_c1/flp0/766     | R01_cb18363_c1/flp0/766      |
| R01_cb11557_c1/flp0/3488     | NA                       | R01_cb11557_c1/flp0/3488    | NA                          | R01_cb11557_c1/flp0/3488     |
| R01_cb11721_c0/flp0/793      | NA                       | R01_cb11721_c0/flp0/793     | R01_cb11721_c0/flp0/793     | R01_cb11721_c0/flp0/793      |
| R01_cb8564_c85248/flp0/3015  | NA                       | R01_cb8564_c85248/flp0/3015 | R01_cb8564_c85248/flp0/3015 | R01_cb8564_c85248/flp0/3015  |
| R01_cb18456_c2308/flp0/1537  | NA                       | NA                          | NA                          | R01_cb18456_c2308/flp0/1537  |
| R01_cb13809_c0/flp0/1776     | R01_cb13809_c0/flp0/1776 | R01_cb13809_c0/flp0/1776    | R01_cb13809_c0/flp0/1776    | R01_cb13809_c0/flp0/1776     |
| R01_cb15145_c1/flp0/417      | NA                       | R01_cb15145_c1/flp0/417     | R01_cb15145_c1/flp0/417     | NA                           |

|                             |                             |                             |                             |                             |
|-----------------------------|-----------------------------|-----------------------------|-----------------------------|-----------------------------|
| R01_cb10024_c318/flp0/642   | NA                          | NA                          | R01_cb10024_c318/flp0/642   | NA                          |
| R01_cb8564_c88321/flp0/2683 | NA                          | NA                          | NA                          | R01_cb8564_c88321/flp0/2683 |
| R01_cb14316_c10/flp0/571    | R01_cb14316_c10/flp0/571    | R01_cb14316_c10/flp0/571    | R01_cb14316_c10/flp0/571    | R01_cb14316_c10/flp0/571    |
| R01_cb4824_c10/flp0/3091    | R01_cb4824_c10/flp0/3091    | R01_cb4824_c10/flp0/3091    | R01_cb4824_c10/flp0/3091    | R01_cb4824_c10/flp0/3091    |
| R01_cb8564_c69907/flp0/2519 | NA                          | R01_cb8564_c69907/flp0/2519 | R01_cb8564_c69907/flp0/2519 | R01_cb8564_c69907/flp0/2519 |
| R01_cb2154_c7/flp0/3516     | R01_cb2154_c7/flp0/3516     | R01_cb2154_c7/flp0/3516     | NA                          | NA                          |
| R01_cb18456_c7425/flp0/503  | R01_cb18456_c7425/flp0/503  | R01_cb18456_c7425/flp0/503  | R01_cb18456_c7425/flp0/503  | R01_cb18456_c7425/flp0/503  |
| R01_cb2970_c7/flp0/528      | NA                          | NA                          | NA                          | R01_cb2970_c7/flp0/528      |
| R01_cb9081_c4/flp0/2358     | NA                          | NA                          | NA                          | R01_cb9081_c4/flp0/2358     |
| R01_cb3582_c2/flp0/3551     | NA                          | R01_cb3582_c2/flp0/3551     | NA                          | NA                          |
| R01_cb17973_c19/flp0/1044   | NA                          | R01_cb17973_c19/flp0/1044   | NA                          | NA                          |
| R01_cb8628_c0/f2p0/2305     | R01_cb8628_c0/f2p0/2305     | R01_cb8628_c0/f2p0/2305     | R01_cb8628_c0/f2p0/2305     | R01_cb8628_c0/f2p0/2305     |
| R01_cb15286_c6/flp0/665     | NA                          | R01_cb15286_c6/flp0/665     | NA                          | NA                          |
| R01_cb4273_c13/flp1/5739    | NA                          | R01_cb4273_c13/flp1/5739    | NA                          | NA                          |
| R01_cb8564_c69195/f2p0/2514 | R01_cb8564_c69195/f2p0/2514 | R01_cb8564_c69195/f2p0/2514 | NA                          | NA                          |
| R01_cb3079_c2/flp0/3958     | NA                          | NA                          | NA                          | R01_cb3079_c2/flp0/3958     |
| R01_cb17749_c1/flp0/1516    | NA                          | R01_cb17749_c1/flp0/1516    | R01_cb17749_c1/flp0/1516    | R01_cb17749_c1/flp0/1516    |
| R01_cb12369_c12/f5p1/561    | NA                          | NA                          | R01_cb12369_c12/f5p1/561    | NA                          |
| R01_cb6391_c5/flp0/2187     | NA                          | R01_cb6391_c5/flp0/2187     | NA                          | NA                          |
| R01_cb9928_c7/flp0/2076     | NA                          | NA                          | NA                          | R01_cb9928_c7/flp0/2076     |
| R01_cb8564_c22694/flp0/4624 | NA                          | R01_cb8564_c22694/flp0/4624 | R01_cb8564_c22694/flp0/4624 | R01_cb8564_c22694/flp0/4624 |
| R01_cb16914_c1/flp0/1100    | NA                          | R01_cb16914_c1/flp0/1100    | NA                          | NA                          |
| R01_cb10593_c0/flp0/1416    | R01_cb10593_c0/flp0/1416    | R01_cb10593_c0/flp0/1416    | R01_cb10593_c0/flp0/1416    | R01_cb10593_c0/flp0/1416    |
| R01_cb16861_c2/flp0/671     | NA                          | R01_cb16861_c2/flp0/671     | NA                          | NA                          |
| R01_cb2133_c43/flp0/3110    | NA                          | R01_cb2133_c43/flp0/3110    | NA                          | NA                          |

|                             |                             |                             |                            |                             |
|-----------------------------|-----------------------------|-----------------------------|----------------------------|-----------------------------|
| R01_cb5774_c1/flp0/3101     | NA                          | R01_cb5774_c1/flp0/3101     | NA                         | R01_cb5774_c1/flp0/3101     |
| R01_cb10696_c3/flp0/1087    | R01_cb10696_c3/flp0/1087    | R01_cb10696_c3/flp0/1087    | R01_cb10696_c3/flp0/1087   | NA                          |
| R01_cb3426_c14/flp0/3417    | NA                          | NA                          | NA                         | R01_cb3426_c14/flp0/3417    |
| R01_cb8335_c8/flp0/2650     | NA                          | NA                          | NA                         | R01_cb8335_c8/flp0/2650     |
| R01_cb6802_c60/flp0/3428    | NA                          | R01_cb6802_c60/flp0/3428    | R01_cb6802_c60/flp0/3428   | R01_cb6802_c60/flp0/3428    |
| R01_cb10024_c215/flp0/586   | NA                          | NA                          | R01_cb10024_c215/flp0/586  | R01_cb10024_c215/flp0/586   |
| R01_cb7741_c3/flp0/2544     | NA                          | NA                          | R01_cb7741_c3/flp0/2544    | R01_cb7741_c3/flp0/2544     |
| R01_cb13033_c0/f5p0/948     | NA                          | R01_cb13033_c0/f5p0/948     | R01_cb13033_c0/f5p0/948    | R01_cb13033_c0/f5p0/948     |
| R01_cb13463_c11/flp0/556    | NA                          | R01_cb13463_c11/flp0/556    | NA                         | R01_cb13463_c11/flp0/556    |
| R01_cb1130_c5/flp0/2483     | NA                          | R01_cb1130_c5/flp0/2483     | NA                         | NA                          |
| R01_cb14125_c159/flp0/767   | NA                          | R01_cb14125_c159/flp0/767   | R01_cb14125_c159/flp0/767  | NA                          |
| R01_cb2552_c4/flp0/2025     | NA                          | R01_cb2552_c4/flp0/2025     | NA                         | NA                          |
| R01_cb14832_c0/f2p0/721     | NA                          | NA                          | NA                         | R01_cb14832_c0/f2p0/721     |
| R01_cb8564_c116137/flp0/249 | R01_cb8564_c116137/flp0/249 | R01_cb8564_c116137/flp0/249 | NA                         | R01_cb8564_c116137/flp0/249 |
| R01_cb6141_c3/flp0/2881     | NA                          | R01_cb6141_c3/flp0/2881     | R01_cb6141_c3/flp0/2881    | NA                          |
| R01_cb2176_c10/flp0/797     | NA                          | R01_cb2176_c10/flp0/797     | NA                         | NA                          |
| R01_cb9382_c0/f2p0/2105     | NA                          | NA                          | NA                         | R01_cb9382_c0/f2p0/2105     |
| R01_cb10015_c403/flp0/830   | NA                          | R01_cb10015_c403/flp0/830   | NA                         | NA                          |
| R01_cb2902_c2/flp0/1960     | NA                          | R01_cb2902_c2/flp0/1960     | NA                         | NA                          |
| R01_cb13602_c23/flp0/1802   | NA                          | NA                          | NA                         | R01_cb13602_c23/flp0/1802   |
| R01_cb16016_c1/flp0/1051    | NA                          | NA                          | NA                         | R01_cb16016_c1/flp0/1051    |
| R01_cb1388_c23/flp1/4341    | NA                          | NA                          | NA                         | R01_cb1388_c23/flp1/4341    |
| R01_cb18456_c7214/flp0/538  | NA                          | R01_cb18456_c7214/flp0/538  | R01_cb18456_c7214/flp0/538 | R01_cb18456_c7214/flp0/538  |
| R01_cb8957_c1/flp0/2225     | NA                          | R01_cb8957_c1/flp0/2225     | NA                         | NA                          |
| R01_cb2415_c12/flp1/6668    | NA                          | NA                          | NA                         | R01_cb2415_c12/flp1/6668    |

|                             |                            |                             |                            |                             |
|-----------------------------|----------------------------|-----------------------------|----------------------------|-----------------------------|
| R01_cb3854_c1/f1p0/2568     | NA                         | NA                          | R01_cb3854_c1/f1p0/2568    | NA                          |
| R01_cb2845_c31/f1p0/3444    | NA                         | NA                          | NA                         | R01_cb2845_c31/f1p0/3444    |
| R01_cb11230_c3/f1p0/1066    | R01_cb11230_c3/f1p0/1066   | NA                          | NA                         | NA                          |
| R01_cb2773_c7/f1p0/3071     | NA                         | R01_cb2773_c7/f1p0/3071     | NA                         | NA                          |
| R01_cb17248_c0/f2p0/412     | R01_cb17248_c0/f2p0/412    | R01_cb17248_c0/f2p0/412     | R01_cb17248_c0/f2p0/412    | R01_cb17248_c0/f2p0/412     |
| R01_cb5595_c45/f1p0/824     | NA                         | R01_cb5595_c45/f1p0/824     | NA                         | R01_cb5595_c45/f1p0/824     |
| R01_cb10207_c8/f1p0/677     | NA                         | R01_cb10207_c8/f1p0/677     | NA                         | NA                          |
| R01_cb8564_c13661/f1p0/2830 | NA                         | R01_cb8564_c13661/f1p0/2830 | NA                         | NA                          |
| R01_cb17101_c2/f1p0/1063    | NA                         | NA                          | NA                         | R01_cb17101_c2/f1p0/1063    |
| R01_cb13383_c5/f1p0/725     | NA                         | R01_cb13383_c5/f1p0/725     | NA                         | NA                          |
| R01_cb8564_c70642/f1p0/2852 | NA                         | R01_cb8564_c70642/f1p0/2852 | NA                         | R01_cb8564_c70642/f1p0/2852 |
| R01_cb13955_c6/f2p0/480     | NA                         | NA                          | NA                         | R01_cb13955_c6/f2p0/480     |
| R01_cb13766_c6/f1p0/659     | NA                         | R01_cb13766_c6/f1p0/659     | NA                         | NA                          |
| R01_cb7468_c4/f1p0/5986     | NA                         | R01_cb7468_c4/f1p0/5986     | NA                         | NA                          |
| R01_cb7296_c9/f1p1/2007     | NA                         | NA                          | NA                         | R01_cb7296_c9/f1p1/2007     |
| R01_cb8564_c2572/f1p0/2028  | NA                         | NA                          | NA                         | R01_cb8564_c2572/f1p0/2028  |
| R01_cb18456_c4774/f1p1/493  | NA                         | NA                          | NA                         | R01_cb18456_c4774/f1p1/493  |
| R01_cb8575_c12/f1p0/362     | R01_cb8575_c12/f1p0/362    | R01_cb8575_c12/f1p0/362     | R01_cb8575_c12/f1p0/362    | R01_cb8575_c12/f1p0/362     |
| R01_cb14882_c7/f1p0/1833    | NA                         | R01_cb14882_c7/f1p0/1833    | NA                         | NA                          |
| R01_cb18456_c7812/f7p0/505  | R01_cb18456_c7812/f7p0/505 | R01_cb18456_c7812/f7p0/505  | R01_cb18456_c7812/f7p0/505 | R01_cb18456_c7812/f7p0/505  |
| R01_cb18223_c22/f1p0/974    | R01_cb18223_c22/f1p0/974   | R01_cb18223_c22/f1p0/974    | R01_cb18223_c22/f1p0/974   | R01_cb18223_c22/f1p0/974    |
| R01_cb8564_c88558/f1p0/2939 | NA                         | NA                          | NA                         | R01_cb8564_c88558/f1p0/2939 |
| R01_cb1080_c4/f1p0/973      | NA                         | R01_cb1080_c4/f1p0/973      | R01_cb1080_c4/f1p0/973     | R01_cb1080_c4/f1p0/973      |
| R01_cb9422_c2/f1p0/2085     | NA                         | R01_cb9422_c2/f1p0/2085     | NA                         | NA                          |
| R01_cb3156_c15/f1p0/5054    | NA                         | NA                          | NA                         | R01_cb3156_c15/f1p0/5054    |
| R01_cb16284_c1/f2p0/583     | R01_cb16284_c1/f2p0/583    | NA                          | NA                         | NA                          |

|                              |                             |                              |                             |                              |
|------------------------------|-----------------------------|------------------------------|-----------------------------|------------------------------|
| R01_cb8564_c48449/f1p0/2775  | R01_cb8564_c48449/f1p0/2775 | R01_cb8564_c48449/f1p0/2775  | NA                          | NA                           |
| R01_cb18456_c1497/f1p1/540   | NA                          | NA                           | NA                          | R01_cb18456_c1497/f1p1/540   |
| R01_cb11155_c0/f7p0/938      | NA                          | R01_cb11155_c0/f7p0/938      | NA                          | NA                           |
| R01_cb8564_c125014/f1p0/2392 | NA                          | NA                           | NA                          | R01_cb8564_c125014/f1p0/2392 |
| R01_cb16037_c6/f1p0/913      | NA                          | R01_cb16037_c6/f1p0/913      | NA                          | NA                           |
| R01_cb8564_c151174/f1p2/2106 | NA                          | R01_cb8564_c151174/f1p2/2106 | NA                          | NA                           |
| R01_cb1905_c11/f1p0/2713     | NA                          | R01_cb1905_c11/f1p0/2713     | R01_cb1905_c11/f1p0/2713    | NA                           |
| R01_cb17885_c11/f1p0/1543    | NA                          | NA                           | NA                          | R01_cb17885_c11/f1p0/1543    |
| R01_cb3929_c9/f1p0/3280      | R01_cb3929_c9/f1p0/3280     | R01_cb3929_c9/f1p0/3280      | R01_cb3929_c9/f1p0/3280     | R01_cb3929_c9/f1p0/3280      |
| R01_cb2027_c5/f1p0/3571      | NA                          | NA                           | R01_cb2027_c5/f1p0/3571     | NA                           |
| R01_cb5100_c1/f1p0/2539      | NA                          | R01_cb5100_c1/f1p0/2539      | R01_cb5100_c1/f1p0/2539     | NA                           |
| R01_cb17895_c0/f1p0/591      | NA                          | NA                           | NA                          | R01_cb17895_c0/f1p0/591      |
| R01_cb1658_c14/f1p2/2824     | NA                          | NA                           | NA                          | R01_cb1658_c14/f1p2/2824     |
| R01_cb10693_c5/f1p0/1679     | NA                          | R01_cb10693_c5/f1p0/1679     | NA                          | R01_cb10693_c5/f1p0/1679     |
| R01_cb16315_c2/f1p0/1297     | NA                          | R01_cb16315_c2/f1p0/1297     | NA                          | NA                           |
| R01_cb4434_c8/f1p1/5298      | NA                          | NA                           | NA                          | R01_cb4434_c8/f1p1/5298      |
| R01_cb8564_c19675/f1p0/4124  | NA                          | R01_cb8564_c19675/f1p0/4124  | R01_cb8564_c19675/f1p0/4124 | R01_cb8564_c19675/f1p0/4124  |
| R01_cb18456_c1554/f3p0/1519  | NA                          | R01_cb18456_c1554/f3p0/1519  | R01_cb18456_c1554/f3p0/1519 | R01_cb18456_c1554/f3p0/1519  |
| R01_cb7222_c5/f2p0/2309      | NA                          | NA                           | NA                          | R01_cb7222_c5/f2p0/2309      |
| R01_cb5896_c64/f1p0/2959     | NA                          | R01_cb5896_c64/f1p0/2959     | NA                          | NA                           |
| R01_cb13178_c20/f1p0/679     | NA                          | R01_cb13178_c20/f1p0/679     | NA                          | NA                           |
| R01_cb15186_c20/f1p0/527     | NA                          | R01_cb15186_c20/f1p0/527     | R01_cb15186_c20/f1p0/527    | R01_cb15186_c20/f1p0/527     |
| R01_cb8564_c934/f2p0/2904    | NA                          | R01_cb8564_c934/f2p0/2904    | R01_cb8564_c934/f2p0/2904   | R01_cb8564_c934/f2p0/2904    |

|                              |                                  |                             |                             |                              |
|------------------------------|----------------------------------|-----------------------------|-----------------------------|------------------------------|
| R01_cb16729_c1/f1p0/921      | NA                               | NA                          | NA                          | R01_cb16729_c1/f1p0/921      |
| R01_cb13857_c2/f1p0/1033     | NA                               | NA                          | NA                          | R01_cb13857_c2/f1p0/1033     |
| R01_cb13478_c4/f4p0/593      | NA                               | R01_cb13478_c4/f4p0/593     | R01_cb13478_c4/f4p0/593     | R01_cb13478_c4/f4p0/593      |
| R01_cb635_c13/f1p0/2491      | NA                               | R01_cb635_c13/f1p0/2491     | R01_cb635_c13/f1p0/2491     | NA                           |
| R01_cb11972_c1/f3p0/1240     | NA                               | NA                          | NA                          | R01_cb11972_c1/f3p0/1240     |
| R01_cb2451_c2/f3p2/3379      | NA                               | NA                          | NA                          | R01_cb2451_c2/f3p2/3379      |
| R01_cb9201_c6/f1p0/2240      | NA                               | NA                          | NA                          | R01_cb9201_c6/f1p0/2240      |
| R01_cb8564_c47145/f1p1/2285  | R01_cb8564_c47145/f1p1/2285<br>5 | R01_cb8564_c47145/f1p1/2285 | R01_cb8564_c47145/f1p1/2285 | R01_cb8564_c47145/f1p1/2285  |
| R01_cb15631_c0/f3p0/776      | NA                               | NA                          | R01_cb15631_c0/f3p0/776     | R01_cb15631_c0/f3p0/776      |
| R01_cb929_c6/f1p0/1332       | NA                               | NA                          | NA                          | R01_cb929_c6/f1p0/1332       |
| R01_cb12575_c2/f1p0/1022     | NA                               | NA                          | NA                          | R01_cb12575_c2/f1p0/1022     |
| R01_cb11629_c3/f1p0/2019     | NA                               | NA                          | NA                          | R01_cb11629_c3/f1p0/2019     |
| R01_cb16347_c0/f6p0/939      | NA                               | R01_cb16347_c0/f6p0/939     | R01_cb16347_c0/f6p0/939     | R01_cb16347_c0/f6p0/939      |
| R01_cb8564_c89194/f2p0/4007  | NA                               | NA                          | NA                          | R01_cb8564_c89194/f2p0/4007  |
| R01_cb8564_c72321/f1p0/3764  | NA                               | NA                          | NA                          | R01_cb8564_c72321/f1p0/3764  |
| R01_cb3637_c6/f1p0/1344      | NA                               | R01_cb3637_c6/f1p0/1344     | NA                          | NA                           |
| R01_cb8564_c52563/f2p0/2936  | R01_cb8564_c52563/f2p0/2936<br>6 | R01_cb8564_c52563/f2p0/2936 | R01_cb8564_c52563/f2p0/2936 | R01_cb8564_c52563/f2p0/2936  |
| R01_cb8564_c3045/f2p0/2896   | R01_cb8564_c3045/f2p0/2896       | R01_cb8564_c3045/f2p0/2896  | R01_cb8564_c3045/f2p0/2896  | NA                           |
| R01_cb8254_c2/f2p0/2398      | NA                               | NA                          | NA                          | R01_cb8254_c2/f2p0/2398      |
| R01_cb10380_c1/f1p0/2987     | NA                               | NA                          | NA                          | R01_cb10380_c1/f1p0/2987     |
| R01_cb8336_c5/f1p0/1195      | R01_cb8336_c5/f1p0/1195          | R01_cb8336_c5/f1p0/1195     | R01_cb8336_c5/f1p0/1195     | R01_cb8336_c5/f1p0/1195      |
| R01_cb18456_c6858/f1p0/409   | NA                               | R01_cb18456_c6858/f1p0/409  | NA                          | NA                           |
| R01_cb8564_c125213/f1p1/2452 | NA                               | NA                          | NA                          | R01_cb8564_c125213/f1p1/2452 |

|                             |                             |                             |                             |                             |
|-----------------------------|-----------------------------|-----------------------------|-----------------------------|-----------------------------|
| R01_cb8564_c18096/flp0/2378 | NA                          | R01_cb8564_c18096/flp0/2378 | R01_cb8564_c18096/flp0/2378 | R01_cb8564_c18096/flp0/2378 |
| R01_cb8564_c115604/flp0/265 | NA                          | R01_cb8564_c115604/flp0/265 | NA                          | NA                          |
| 1                           |                             | 1                           |                             |                             |
| R01_cb8252_c5/flp0/2191     | NA                          | NA                          | NA                          | R01_cb8252_c5/flp0/2191     |
| R01_cb8209_c3/flp0/2130     | NA                          | NA                          | NA                          | R01_cb8209_c3/flp0/2130     |
| R01_cb8564_c17623/flp0/4985 | NA                          | R01_cb8564_c17623/flp0/4985 | R01_cb8564_c17623/flp0/4985 | NA                          |
| R01_cb17250_c0/f2p0/593     | NA                          | R01_cb17250_c0/f2p0/593     | NA                          | R01_cb17250_c0/f2p0/593     |
| R01_cb11590_c1/flp0/3691    | NA                          | R01_cb11590_c1/flp0/3691    | NA                          | NA                          |
| R01_cb14146_c4/f4p0/1224    | NA                          | NA                          | NA                          | R01_cb14146_c4/f4p0/1224    |
| R01_cb1380_c14/flp0/2371    | R01_cb1380_c14/flp0/2371    | R01_cb1380_c14/flp0/2371    | NA                          | R01_cb1380_c14/flp0/2371    |
| R01_cb4173_c8/flp0/3178     | NA                          | R01_cb4173_c8/flp0/3178     | NA                          | NA                          |
| R01_cb8564_c4534/flp0/2993  | NA                          | R01_cb8564_c4534/flp0/2993  | R01_cb8564_c4534/flp0/2993  | R01_cb8564_c4534/flp0/2993  |
| R01_cb14316_c17/flp0/1083   | NA                          | R01_cb14316_c17/flp0/1083   | R01_cb14316_c17/flp0/1083   | R01_cb14316_c17/flp0/1083   |
| R01_cb13178_c4/f2p0/524     | NA                          | R01_cb13178_c4/f2p0/524     | NA                          | NA                          |
| R01_cb1437_c2/flp0/4325     | NA                          | NA                          | NA                          | R01_cb1437_c2/flp0/4325     |
| R01_cb8564_c51232/flp0/1905 | R01_cb8564_c51232/flp0/1905 | R01_cb8564_c51232/flp0/1905 | R01_cb8564_c51232/flp0/1905 | R01_cb8564_c51232/flp0/1905 |
| 5                           |                             |                             |                             |                             |
| R01_cb17040_c0/flp0/1080    | NA                          | R01_cb17040_c0/flp0/1080    | NA                          | R01_cb17040_c0/flp0/1080    |
| R01_cb12923_c8/flp1/1062    | NA                          | NA                          | R01_cb12923_c8/flp1/1062    | R01_cb12923_c8/flp1/1062    |
| R01_cb8564_c9813/f2p1/2854  | NA                          | R01_cb8564_c9813/f2p1/2854  | R01_cb8564_c9813/f2p1/2854  | R01_cb8564_c9813/f2p1/2854  |
| R01_cb18409_c7/f4p0/376     | R01_cb18409_c7/f4p0/376     | R01_cb18409_c7/f4p0/376     | R01_cb18409_c7/f4p0/376     | R01_cb18409_c7/f4p0/376     |
| R01_cb6636_c3/flp0/1512     | NA                          | NA                          | NA                          | R01_cb6636_c3/flp0/1512     |
| R01_cb8564_c4491/flp0/2977  | NA                          | NA                          | NA                          | R01_cb8564_c4491/flp0/2977  |
| R01_cb8564_c469/f3p3/2572   | NA                          | NA                          | NA                          | R01_cb8564_c469/f3p3/2572   |
| R01_cb9535_c14/flp0/2723    | NA                          | R01_cb9535_c14/flp0/2723    | R01_cb9535_c14/flp0/2723    | NA                          |
| R01_cb8564_c1860/flp0/2527  | NA                          | NA                          | NA                          | R01_cb8564_c1860/flp0/2527  |

|                              |                           |                              |                           |                              |
|------------------------------|---------------------------|------------------------------|---------------------------|------------------------------|
| R01_cb7293_c2/flp0/2455      | R01_cb7293_c2/flp0/2455   | R01_cb7293_c2/flp0/2455      | NA                        | NA                           |
| R01_cb8564_c115967/flp0/2355 | NA                        | R01_cb8564_c115967/flp0/2355 | NA                        | R01_cb8564_c115967/flp0/2355 |
| R01_cb7954_c2/flp0/1046      | NA                        | NA                           | NA                        | R01_cb7954_c2/flp0/1046      |
| R01_cb17823_c0/flp0/1685     | NA                        | R01_cb17823_c0/flp0/1685     | NA                        | NA                           |
| R01_cb8564_c79729/flp0/2580  | NA                        | NA                           | NA                        | R01_cb8564_c79729/flp0/2580  |
| R01_cb4313_c2/flp0/3379      | NA                        | R01_cb4313_c2/flp0/3379      | NA                        | NA                           |
| R01_cb8564_c75399/flp0/3099  | NA                        | NA                           | NA                        | R01_cb8564_c75399/flp0/3099  |
| R01_cb10599_c3/flp0/1697     | NA                        | R01_cb10599_c3/flp0/1697     | NA                        | NA                           |
| R01_cb5533_c136/flp0/2939    | NA                        | NA                           | NA                        | R01_cb5533_c136/flp0/2939    |
| R01_cb8564_c115154/flp0/3120 | NA                        | R01_cb8564_c115154/flp0/3120 | NA                        | R01_cb8564_c115154/flp0/3120 |
| R01_cb17973_c40/flp0/885     | R01_cb17973_c40/flp0/885  | R01_cb17973_c40/flp0/885     | R01_cb17973_c40/flp0/885  | NA                           |
| R01_cb273_c3/flp0/2380       | NA                        | R01_cb273_c3/flp0/2380       | NA                        | NA                           |
| R01_cb17266_c11/flp0/1070    | NA                        | R01_cb17266_c11/flp0/1070    | R01_cb17266_c11/flp0/1070 | R01_cb17266_c11/flp0/1070    |
| R01_cb10015_c482/flp0/446    | R01_cb10015_c482/flp0/446 | R01_cb10015_c482/flp0/446    | R01_cb10015_c482/flp0/446 | R01_cb10015_c482/flp0/446    |
| R01_cb16813_c0/flp0/1207     | R01_cb16813_c0/flp0/1207  | R01_cb16813_c0/flp0/1207     | R01_cb16813_c0/flp0/1207  | R01_cb16813_c0/flp0/1207     |
| R01_cb15053_c9/flp0/882      | NA                        | R01_cb15053_c9/flp0/882      | R01_cb15053_c9/flp0/882   | NA                           |
| R01_cb10912_c8/flp0/1076     | NA                        | R01_cb10912_c8/flp0/1076     | NA                        | NA                           |
| R01_cb16296_c0/flp0/1101     | NA                        | NA                           | NA                        | R01_cb16296_c0/flp0/1101     |
| R01_cb3426_c13/flp0/3035     | NA                        | NA                           | NA                        | R01_cb3426_c13/flp0/3035     |
| R01_cb4198_c3/flp0/2176      | NA                        | NA                           | NA                        | R01_cb4198_c3/flp0/2176      |
| R01_cb7219_c3/f3p3/2350      | NA                        | NA                           | NA                        | R01_cb7219_c3/f3p3/2350      |
| R01_cb14557_c1/flp0/1434     | NA                        | NA                           | NA                        | R01_cb14557_c1/flp0/1434     |
| R01_cb8564_c43567/flp0/2412  | NA                        | R01_cb8564_c43567/flp0/2412  | NA                        | NA                           |
| R01_cb12022_c8/flp0/539      | NA                        | R01_cb12022_c8/flp0/539      | NA                        | NA                           |



|                             |                             |                             |                             |                             |
|-----------------------------|-----------------------------|-----------------------------|-----------------------------|-----------------------------|
| R01_cb12328_c6/flp1/1569    | NA                          | NA                          | NA                          | R01_cb12328_c6/flp1/1569    |
| R01_cb17538_c0/f2p0/1497    | NA                          | NA                          | NA                          | R01_cb17538_c0/f2p0/1497    |
| R01_cb8564_c48640/flp0/3383 | R01_cb8564_c48640/flp0/3383 | R01_cb8564_c48640/flp0/3383 | NA                          | R01_cb8564_c48640/flp0/3383 |
| R01_cb14849_c3/flp0/1248    | NA                          | R01_cb14849_c3/flp0/1248    | NA                          | NA                          |
| R01_cb2822_c3/flp0/3144     | NA                          | R01_cb2822_c3/flp0/3144     | NA                          | NA                          |
| R01_cb9448_c4/flp1/2080     | NA                          | NA                          | NA                          | R01_cb9448_c4/flp1/2080     |
| R01_cb10042_c1/flp0/2066    | NA                          | NA                          | NA                          | R01_cb10042_c1/flp0/2066    |
| R01_cb17236_c3/flp0/623     | R01_cb17236_c3/flp0/623     | R01_cb17236_c3/flp0/623     | R01_cb17236_c3/flp0/623     | R01_cb17236_c3/flp0/623     |
| R01_cb16645_c60/flp0/926    | R01_cb16645_c60/flp0/926    | R01_cb16645_c60/flp0/926    | R01_cb16645_c60/flp0/926    | R01_cb16645_c60/flp0/926    |
| R01_cb8564_c1286/flp0/3383  | NA                          | R01_cb8564_c1286/flp0/3383  | R01_cb8564_c1286/flp0/3383  | R01_cb8564_c1286/flp0/3383  |
| R01_cb17951_c0/flp0/1033    | NA                          | NA                          | NA                          | R01_cb17951_c0/flp0/1033    |
| R01_cb1391_c0/flp0/4343     | NA                          | R01_cb1391_c0/flp0/4343     | NA                          | NA                          |
| R01_cb14523_c0/f2p0/1763    | NA                          | NA                          | NA                          | R01_cb14523_c0/f2p0/1763    |
| R01_cb15574_c5/f6p0/548     | NA                          | NA                          | R01_cb15574_c5/f6p0/548     | R01_cb15574_c5/f6p0/548     |
| R01_cb6777_c2/flp0/328      | R01_cb6777_c2/flp0/328      | R01_cb6777_c2/flp0/328      | NA                          | R01_cb6777_c2/flp0/328      |
| R01_cb12703_c3/flp0/1794    | NA                          | NA                          | NA                          | R01_cb12703_c3/flp0/1794    |
| R01_cb16768_c1/flp0/714     | NA                          | R01_cb16768_c1/flp0/714     | NA                          | NA                          |
| R01_cb2970_c10/fl2p0/519    | NA                          | NA                          | NA                          | R01_cb2970_c10/fl2p0/519    |
| R01_cb17555_c5/f2p0/690     | R01_cb17555_c5/f2p0/690     | NA                          | NA                          | NA                          |
| R01_cb8564_c83321/flp0/2077 | NA                          | R01_cb8564_c83321/flp0/2077 | R01_cb8564_c83321/flp0/2077 | R01_cb8564_c83321/flp0/2077 |
| R01_cb8564_c68642/f7p2/2593 | NA                          | R01_cb8564_c68642/f7p2/2593 | R01_cb8564_c68642/f7p2/2593 | R01_cb8564_c68642/f7p2/2593 |
| R01_cb392_c5/flp0/1982      | NA                          | R01_cb392_c5/flp0/1982      | NA                          | NA                          |
| R01_cb8564_c89795/flp0/3174 | R01_cb8564_c89795/flp0/3174 | R01_cb8564_c89795/flp0/3174 | R01_cb8564_c89795/flp0/3174 | R01_cb8564_c89795/flp0/3174 |
| R01_cb12554_c1/flp1/1603    | NA                          | NA                          | NA                          | R01_cb12554_c1/flp1/1603    |

|                             |                             |                             |                          |                             |
|-----------------------------|-----------------------------|-----------------------------|--------------------------|-----------------------------|
| R01_cb16678_c9/f1p0/680     | NA                          | R01_cb16678_c9/f1p0/680     | R01_cb16678_c9/f1p0/680  | R01_cb16678_c9/f1p0/680     |
| R01_cb13884_c5/f2p0/931     | R01_cb13884_c5/f2p0/931     | NA                          | R01_cb13884_c5/f2p0/931  | R01_cb13884_c5/f2p0/931     |
| R01_cb2226_c2/f1p0/3587     | NA                          | NA                          | NA                       | R01_cb2226_c2/f1p0/3587     |
| R01_cb16425_c5/f1p0/1201    | R01_cb16425_c5/f1p0/1201    | R01_cb16425_c5/f1p0/1201    | NA                       | NA                          |
| R01_cb11455_c1/f3p0/529     | NA                          | R01_cb11455_c1/f3p0/529     | NA                       | R01_cb11455_c1/f3p0/529     |
| R01_cb16730_c0/f4p0/509     | NA                          | R01_cb16730_c0/f4p0/509     | NA                       | R01_cb16730_c0/f4p0/509     |
| R01_cb8564_c70563/f1p1/2317 | NA                          | R01_cb8564_c70563/f1p1/2317 | NA                       | R01_cb8564_c70563/f1p1/2317 |
| R01_cb10539_c8/f1p0/869     | NA                          | NA                          | NA                       | R01_cb10539_c8/f1p0/869     |
| R01_cb15891_c0/f3p0/925     | NA                          | R01_cb15891_c0/f3p0/925     | NA                       | NA                          |
| R01_cb5218_c3/f1p0/2697     | NA                          | R01_cb5218_c3/f1p0/2697     | NA                       | NA                          |
| R01_cb699_c1/f1p0/2587      | NA                          | NA                          | NA                       | R01_cb699_c1/f1p0/2587      |
| R01_cb8564_c14735/f1p0/2354 | NA                          | R01_cb8564_c14735/f1p0/2354 | NA                       | NA                          |
| R01_cb14477_c0/f2p1/965     | NA                          | NA                          | NA                       | R01_cb14477_c0/f2p1/965     |
| R01_cb16688_c1/f1p1/584     | R01_cb16688_c1/f1p1/584     | R01_cb16688_c1/f1p1/584     | R01_cb16688_c1/f1p1/584  | NA                          |
| R01_cb15644_c0/f2p0/470     | NA                          | R01_cb15644_c0/f2p0/470     | R01_cb15644_c0/f2p0/470  | R01_cb15644_c0/f2p0/470     |
| R01_cb3362_c56/f1p0/8236    | NA                          | R01_cb3362_c56/f1p0/8236    | NA                       | NA                          |
| R01_cb16297_c2/f1p0/996     | NA                          | R01_cb16297_c2/f1p0/996     | NA                       | NA                          |
| R01_cb17973_c49/f1p0/712    | NA                          | NA                          | R01_cb17973_c49/f1p0/712 | R01_cb17973_c49/f1p0/712    |
| R01_cb9274_c8/f1p1/2058     | NA                          | NA                          | NA                       | R01_cb9274_c8/f1p1/2058     |
| R01_cb18372_c0/f4p0/2681    | NA                          | NA                          | NA                       | R01_cb18372_c0/f4p0/2681    |
| R01_cb8564_c68692/f6p1/3141 | R01_cb8564_c68692/f6p1/3141 | R01_cb8564_c68692/f6p1/3141 | NA                       | NA                          |
| R01_cb15724_c2/f1p0/1445    | R01_cb15724_c2/f1p0/1445    | R01_cb15724_c2/f1p0/1445    | R01_cb15724_c2/f1p0/1445 | R01_cb15724_c2/f1p0/1445    |
| R01_cb2756_c14/f1p0/991     | NA                          | NA                          | R01_cb2756_c14/f1p0/991  | R01_cb2756_c14/f1p0/991     |
| R01_cb17166_c2/f1p0/1788    | NA                          | R01_cb17166_c2/f1p0/1788    | NA                       | NA                          |
| R01_cb8779_c11/f1p0/3602    | NA                          | R01_cb8779_c11/f1p0/3602    | NA                       | R01_cb8779_c11/f1p0/3602    |

|                             |                          |                             |                             |                             |
|-----------------------------|--------------------------|-----------------------------|-----------------------------|-----------------------------|
| R01_cb1903_c2/f2p0/2546     | NA                       | R01_cb1903_c2/f2p0/2546     | R01_cb1903_c2/f2p0/2546     | R01_cb1903_c2/f2p0/2546     |
| R01_cb8779_c4/flp0/2202     | NA                       | R01_cb8779_c4/flp0/2202     | NA                          | R01_cb8779_c4/flp0/2202     |
| R01_cb8564_c52978/flp0/2089 | NA                       | R01_cb8564_c52978/flp0/2089 | NA                          | R01_cb8564_c52978/flp0/2089 |
| R01_cb8564_c3781/flp0/3919  | NA                       | NA                          | NA                          | R01_cb8564_c3781/flp0/3919  |
| R01_cb10758_c4/flp0/560     | R01_cb10758_c4/flp0/560  | R01_cb10758_c4/flp0/560     | R01_cb10758_c4/flp0/560     | R01_cb10758_c4/flp0/560     |
| R01_cb15566_c0/flp0/756     | NA                       | NA                          | NA                          | R01_cb15566_c0/flp0/756     |
| R01_cb1706_c12/flp0/2418    | NA                       | NA                          | NA                          | R01_cb1706_c12/flp0/2418    |
| R01_cb1706_c16/flp0/2348    | NA                       | NA                          | NA                          | R01_cb1706_c16/flp0/2348    |
| R01_cb15756_c1/f2p0/628     | NA                       | NA                          | NA                          | R01_cb15756_c1/f2p0/628     |
| R01_cb15074_c11/flp0/907    | R01_cb15074_c11/flp0/907 | R01_cb15074_c11/flp0/907    | NA                          | NA                          |
| R01_cb10326_c8/flp0/1789    | R01_cb10326_c8/flp0/1789 | R01_cb10326_c8/flp0/1789    | NA                          | R01_cb10326_c8/flp0/1789    |
| R01_cb2845_c25/flp0/3405    | NA                       | NA                          | NA                          | R01_cb2845_c25/flp0/3405    |
| R01_cb18301_c29/flp0/1194   | NA                       | R01_cb18301_c29/flp0/1194   | NA                          | NA                          |
| R01_cb8564_c89297/flp0/2453 | NA                       | NA                          | NA                          | R01_cb8564_c89297/flp0/2453 |
| R01_cb8564_c88606/flp0/2421 | NA                       | R01_cb8564_c88606/flp0/2421 | R01_cb8564_c88606/flp0/2421 | R01_cb8564_c88606/flp0/2421 |
| R01_cb16106_c0/f2p1/602     | NA                       | R01_cb16106_c0/f2p1/602     | NA                          | NA                          |
| R01_cb16094_c3/flp0/756     | NA                       | NA                          | NA                          | R01_cb16094_c3/flp0/756     |
| R01_cb18409_c71/flp0/1795   | NA                       | R01_cb18409_c71/flp0/1795   | NA                          | NA                          |
| R01_cb10086_c2/f4p1/1350    | NA                       | NA                          | NA                          | R01_cb10086_c2/f4p1/1350    |
| R01_cb5107_c1/flp0/1929     | NA                       | R01_cb5107_c1/flp0/1929     | NA                          | NA                          |
| R01_cb17446_c0/flp0/1723    | NA                       | NA                          | NA                          | R01_cb17446_c0/flp0/1723    |
| R01_cb2807_c5/flp0/1094     | NA                       | NA                          | R01_cb2807_c5/flp0/1094     | R01_cb2807_c5/flp0/1094     |
| R01_cb7463_c9/flp0/2403     | NA                       | R01_cb7463_c9/flp0/2403     | NA                          | NA                          |
| R01_cb1835_c1/flp0/4155     | NA                       | NA                          | NA                          | R01_cb1835_c1/flp0/4155     |
| R01_cb4836_c5/flp1/1805     | NA                       | NA                          | NA                          | R01_cb4836_c5/flp1/1805     |
| R01_cb8564_c119851/flp0/231 | NA                       | NA                          | R01_cb8564_c119851/flp0/231 | R01_cb8564_c119851/flp0/231 |

|                             |                            |                            |                          |                             |
|-----------------------------|----------------------------|----------------------------|--------------------------|-----------------------------|
| 0                           |                            |                            | 0                        | 0                           |
| R01_cb17103_c4/flp0/1440    | NA                         | NA                         | NA                       | R01_cb17103_c4/flp0/1440    |
| R01_cb14010_c0/flp0/1302    | NA                         | NA                         | NA                       | R01_cb14010_c0/flp0/1302    |
| R01_cb8564_c68122/f5p2/2959 | NA                         | NA                         | NA                       | R01_cb8564_c68122/f5p2/2959 |
| R01_cb15526_c2/flp0/1242    | NA                         | NA                         | NA                       | R01_cb15526_c2/flp0/1242    |
| R01_cb10385_c2/flp0/1609    | NA                         | R01_cb10385_c2/flp0/1609   | NA                       | NA                          |
| R01_cb5720_c5/flp0/2641     | NA                         | NA                         | NA                       | R01_cb5720_c5/flp0/2641     |
| R01_cb6563_c1/flp0/3933     | NA                         | R01_cb6563_c1/flp0/3933    | NA                       | NA                          |
| R01_cb16080_c0/f2p0/1212    | NA                         | NA                         | R01_cb16080_c0/f2p0/1212 | NA                          |
| R01_cb16396_c0/flp0/1814    | NA                         | R01_cb16396_c0/flp0/1814   | NA                       | NA                          |
| R01_cb7008_c12/flp0/3438    | NA                         | R01_cb7008_c12/flp0/3438   | NA                       | NA                          |
| R01_cb2552_c5/flp0/1147     | NA                         | R01_cb2552_c5/flp0/1147    | R01_cb2552_c5/flp0/1147  | NA                          |
| R01_cb13146_c7/flp0/647     | NA                         | NA                         | R01_cb13146_c7/flp0/647  | R01_cb13146_c7/flp0/647     |
| R01_cb17973_c10/flp0/826    | R01_cb17973_c10/flp0/826   | R01_cb17973_c10/flp0/826   | NA                       | R01_cb17973_c10/flp0/826    |
| R01_cb17154_c1/flp0/735     | NA                         | R01_cb17154_c1/flp0/735    | R01_cb17154_c1/flp0/735  | R01_cb17154_c1/flp0/735     |
| R01_cb9834_c7/flp0/926      | R01_cb9834_c7/flp0/926     | R01_cb9834_c7/flp0/926     | NA                       | R01_cb9834_c7/flp0/926      |
| R01_cb2229_c45/flp0/3297    | NA                         | R01_cb2229_c45/flp0/3297   | NA                       | NA                          |
| R01_cb13761_c0/flp0/1165    | R01_cb13761_c0/flp0/1165   | R01_cb13761_c0/flp0/1165   | R01_cb13761_c0/flp0/1165 | R01_cb13761_c0/flp0/1165    |
| R01_cb16806_c1/flp0/691     | NA                         | R01_cb16806_c1/flp0/691    | R01_cb16806_c1/flp0/691  | NA                          |
| R01_cb14308_c2/flp0/550     | R01_cb14308_c2/flp0/550    | R01_cb14308_c2/flp0/550    | R01_cb14308_c2/flp0/550  | R01_cb14308_c2/flp0/550     |
| R01_cb1326_c10/flp0/3807    | NA                         | R01_cb1326_c10/flp0/3807   | NA                       | NA                          |
| R01_cb18456_c6283/flp0/883  | R01_cb18456_c6283/flp0/883 | R01_cb18456_c6283/flp0/883 | NA                       | NA                          |
| R01_cb16673_c9/flp1/628     | NA                         | R01_cb16673_c9/flp1/628    | NA                       | NA                          |
| R01_cb12443_c3/flp0/341     | R01_cb12443_c3/flp0/341    | R01_cb12443_c3/flp0/341    | R01_cb12443_c3/flp0/341  | R01_cb12443_c3/flp0/341     |
| R01_cb4030_c3/flp0/2235     | NA                         | NA                         | NA                       | R01_cb4030_c3/flp0/2235     |
| R01_cb10846_c3/flp0/1852    | NA                         | R01_cb10846_c3/flp0/1852   | NA                       | NA                          |

|                              |                            |                            |                          |                              |
|------------------------------|----------------------------|----------------------------|--------------------------|------------------------------|
| R01_cb10816_c2/flp0/2866     | NA                         | R01_cb10816_c2/flp0/2866   | NA                       | NA                           |
| R01_cb8564_c118424/flp0/2950 | NA                         | NA                         | NA                       | R01_cb8564_c118424/flp0/2950 |
| R01_cb7539_c2/flp0/2284      | NA                         | NA                         | R01_cb7539_c2/flp0/2284  | R01_cb7539_c2/flp0/2284      |
| R01_cb12722_c7/flp0/1353     | NA                         | NA                         | NA                       | R01_cb12722_c7/flp0/1353     |
| R01_cb1437_c8/flp1/4051      | NA                         | NA                         | NA                       | R01_cb1437_c8/flp1/4051      |
| R01_cb3228_c1/f2p0/544       | NA                         | R01_cb3228_c1/f2p0/544     | NA                       | NA                           |
| R01_cb7254_c6/flp0/2354      | NA                         | NA                         | NA                       | R01_cb7254_c6/flp0/2354      |
| R01_cb18192_c10/flp0/737     | NA                         | R01_cb18192_c10/flp0/737   | R01_cb18192_c10/flp0/737 | R01_cb18192_c10/flp0/737     |
| R01_cb9192_c1/flp0/2077      | NA                         | NA                         | NA                       | R01_cb9192_c1/flp0/2077      |
| R01_cb15540_c1/f2p2/1575     | NA                         | NA                         | NA                       | R01_cb15540_c1/f2p2/1575     |
| R01_cb1203_c25/flp0/1362     | NA                         | NA                         | NA                       | R01_cb1203_c25/flp0/1362     |
| R01_cb11178_c1/flp0/2680     | NA                         | R01_cb11178_c1/flp0/2680   | NA                       | NA                           |
| R01_cb8865_c1/flp0/2492      | NA                         | NA                         | NA                       | R01_cb8865_c1/flp0/2492      |
| R01_cb15931_c0/f3p0/1004     | NA                         | NA                         | NA                       | R01_cb15931_c0/f3p0/1004     |
| R01_cb18456_c7681/flp0/450   | R01_cb18456_c7681/flp0/450 | R01_cb18456_c7681/flp0/450 | NA                       | R01_cb18456_c7681/flp0/450   |
| R01_cb3498_c20/flp0/745      | R01_cb3498_c20/flp0/745    | R01_cb3498_c20/flp0/745    | NA                       | NA                           |
| R01_cb8564_c659/flp3/2696    | NA                         | R01_cb8564_c659/flp3/2696  | NA                       | NA                           |
| R01_cb16153_c0/f5p1/1226     | NA                         | NA                         | R01_cb16153_c0/f5p1/1226 | R01_cb16153_c0/f5p1/1226     |
| R01_cb15916_c3/flp0/1788     | NA                         | NA                         | NA                       | R01_cb15916_c3/flp0/1788     |
| R01_cb13178_c0/f3p0/551      | NA                         | R01_cb13178_c0/f3p0/551    | NA                       | NA                           |
| R01_cb15663_c1/flp0/1537     | NA                         | NA                         | NA                       | R01_cb15663_c1/flp0/1537     |
| R01_cb1964_c2/flp0/2293      | NA                         | R01_cb1964_c2/flp0/2293    | NA                       | R01_cb1964_c2/flp0/2293      |
| R01_cb1581_c6/flp0/3854      | NA                         | R01_cb1581_c6/flp0/3854    | NA                       | NA                           |
| R01_cb17281_c0/flp0/1012     | NA                         | NA                         | NA                       | R01_cb17281_c0/flp0/1012     |
| R01_cb10650_c6/flp0/1828     | NA                         | R01_cb10650_c6/flp0/1828   | NA                       | NA                           |

|                              |                             |                              |                              |                              |
|------------------------------|-----------------------------|------------------------------|------------------------------|------------------------------|
| R01_cb2602_c3/f1p0/3860      | NA                          | R01_cb2602_c3/f1p0/3860      | NA                           | NA                           |
| R01_cb16141_c0/f2p0/581      | R01_cb16141_c0/f2p0/581     | R01_cb16141_c0/f2p0/581      | R01_cb16141_c0/f2p0/581      | R01_cb16141_c0/f2p0/581      |
| R01_cb12191_c4/f1p1/838      | NA                          | NA                           | NA                           | R01_cb12191_c4/f1p1/838      |
| R01_cb14886_c5/f1p0/848      | NA                          | NA                           | R01_cb14886_c5/f1p0/848      | NA                           |
| R01_cb17083_c4/f1p0/963      | NA                          | R01_cb17083_c4/f1p0/963      | R01_cb17083_c4/f1p0/963      | R01_cb17083_c4/f1p0/963      |
| R01_cb14886_c1/f2p0/335      | R01_cb14886_c1/f2p0/335     | R01_cb14886_c1/f2p0/335      | R01_cb14886_c1/f2p0/335      | R01_cb14886_c1/f2p0/335      |
| R01_cb8564_c116212/f1p0/2680 | NA                          | R01_cb8564_c116212/f1p0/2680 | R01_cb8564_c116212/f1p0/2680 | R01_cb8564_c116212/f1p0/2680 |
| R01_cb8564_c13299/f1p0/3229  | NA                          | R01_cb8564_c13299/f1p0/3229  | R01_cb8564_c13299/f1p0/3229  | R01_cb8564_c13299/f1p0/3229  |
| R01_cb8814_c12/f1p0/1511     | NA                          | R01_cb8814_c12/f1p0/1511     | NA                           | NA                           |
| R01_cb10708_c0/f1p0/1783     | NA                          | R01_cb10708_c0/f1p0/1783     | NA                           | NA                           |
| R01_cb4953_c4/f1p0/2996      | NA                          | NA                           | NA                           | R01_cb4953_c4/f1p0/2996      |
| R01_cb5480_c1/f1p0/3608      | NA                          | R01_cb5480_c1/f1p0/3608      | R01_cb5480_c1/f1p0/3608      | NA                           |
| R01_cb13273_c0/f2p0/1111     | R01_cb13273_c0/f2p0/1111    | R01_cb13273_c0/f2p0/1111     | R01_cb13273_c0/f2p0/1111     | R01_cb13273_c0/f2p0/1111     |
| R01_cb18456_c5911/f1p0/444   | R01_cb18456_c5911/f1p0/444  | R01_cb18456_c5911/f1p0/444   | R01_cb18456_c5911/f1p0/444   | R01_cb18456_c5911/f1p0/444   |
| R01_cb17907_c1/f1p0/1120     | NA                          | R01_cb17907_c1/f1p0/1120     | NA                           | NA                           |
| R01_cb2022_c17/f1p0/2034     | NA                          | NA                           | NA                           | R01_cb2022_c17/f1p0/2034     |
| R01_cb10024_c188/f2p0/742    | NA                          | NA                           | R01_cb10024_c188/f2p0/742    | NA                           |
| R01_cb7320_c6/f1p0/4635      | NA                          | NA                           | NA                           | R01_cb7320_c6/f1p0/4635      |
| R01_cb18285_c0/f1p0/966      | NA                          | NA                           | NA                           | R01_cb18285_c0/f1p0/966      |
| R01_cb13475_c2/f1p0/603      | R01_cb13475_c2/f1p0/603     | R01_cb13475_c2/f1p0/603      | R01_cb13475_c2/f1p0/603      | R01_cb13475_c2/f1p0/603      |
| R01_cb15890_c1/f1p0/1180     | NA                          | NA                           | NA                           | R01_cb15890_c1/f1p0/1180     |
| R01_cb4785_c8/f2p0/2680      | NA                          | NA                           | NA                           | R01_cb4785_c8/f2p0/2680      |
| R01_cb10008_c4/f2p0/799      | NA                          | R01_cb10008_c4/f2p0/799      | NA                           | NA                           |
| R01_cb13433_c92/f1p1/1433    | NA                          | R01_cb13433_c92/f1p1/1433    | NA                           | NA                           |
| R01_cb8564_c25336/f1p0/1982  | R01_cb8564_c25336/f1p0/1982 | R01_cb8564_c25336/f1p0/1982  | R01_cb8564_c25336/f1p0/1982  | R01_cb8564_c25336/f1p0/1982  |

|                              |                             |                             |                             |                              |
|------------------------------|-----------------------------|-----------------------------|-----------------------------|------------------------------|
|                              | 2                           |                             |                             |                              |
| R01_cb11141_c1/flp0/1309     | NA                          | NA                          | NA                          | R01_cb11141_c1/flp0/1309     |
| R01_cb8564_c37679/flp0/4074  | NA                          | NA                          | NA                          | R01_cb8564_c37679/flp0/4074  |
| R01_cb8564_c182504/flp1/2670 | NA                          | NA                          | NA                          | R01_cb8564_c182504/flp1/2670 |
| R01_cb18456_c1866/flp0/1138  | NA                          | R01_cb18456_c1866/flp0/1138 | R01_cb18456_c1866/flp0/1138 | R01_cb18456_c1866/flp0/1138  |
| R01_cb8564_c15756/flp0/2871  | NA                          | R01_cb8564_c15756/flp0/2871 | NA                          | NA                           |
| R01_cb7625_c9/flp1/475       | NA                          | NA                          | NA                          | R01_cb7625_c9/flp1/475       |
| R01_cb8564_c85849/flp0/2262  | NA                          | R01_cb8564_c85849/flp0/2262 | R01_cb8564_c85849/flp0/2262 | R01_cb8564_c85849/flp0/2262  |
| R01_cb4077_c5/flp0/2133      | NA                          | R01_cb4077_c5/flp0/2133     | NA                          | NA                           |
| R01_cb8564_c69988/flp0/2405  | NA                          | R01_cb8564_c69988/flp0/2405 | NA                          | NA                           |
| R01_cb17806_c2/flp0/827      | NA                          | R01_cb17806_c2/flp0/827     | NA                          | R01_cb17806_c2/flp0/827      |
| R01_cb13273_c1/flp0/1620     | R01_cb13273_c1/flp0/1620    | R01_cb13273_c1/flp0/1620    | R01_cb13273_c1/flp0/1620    | R01_cb13273_c1/flp0/1620     |
| R01_cb8564_c146692/f3p0/2128 | NA                          | NA                          | NA                          | R01_cb8564_c146692/f3p0/2128 |
| R01_cb8564_c9368/f3p0/3414   | NA                          | NA                          | NA                          | R01_cb8564_c9368/f3p0/3414   |
| R01_cb11189_c0/flp0/1527     | NA                          | R01_cb11189_c0/flp0/1527    | NA                          | R01_cb11189_c0/flp0/1527     |
| R01_cb3426_c16/flp1/3300     | NA                          | NA                          | NA                          | R01_cb3426_c16/flp1/3300     |
| R01_cb5950_c5/flp0/2305      | NA                          | NA                          | NA                          | R01_cb5950_c5/flp0/2305      |
| R01_cb17520_c1/flp0/462      | NA                          | R01_cb17520_c1/flp0/462     | R01_cb17520_c1/flp0/462     | R01_cb17520_c1/flp0/462      |
| R01_cb5900_c101/flp0/2044    | NA                          | R01_cb5900_c101/flp0/2044   | NA                          | R01_cb5900_c101/flp0/2044    |
| R01_cb8564_c72324/flp0/2625  | R01_cb8564_c72324/flp0/2625 | R01_cb8564_c72324/flp0/2625 | NA                          | NA                           |
| R01_cb9306_c0/f3p1/2058      | NA                          | R01_cb9306_c0/f3p1/2058     | NA                          | NA                           |
| R01_cb18456_c1363/f4p0/419   | R01_cb18456_c1363/f4p0/419  | R01_cb18456_c1363/f4p0/419  | R01_cb18456_c1363/f4p0/419  | R01_cb18456_c1363/f4p0/419   |
| R01_cb8564_c78003/flp1/2972  | NA                          | R01_cb8564_c78003/flp1/2972 | R01_cb8564_c78003/flp1/2972 | R01_cb8564_c78003/flp1/2972  |

|                              |                          |                              |                              |                              |
|------------------------------|--------------------------|------------------------------|------------------------------|------------------------------|
| R01_cb8564_c85405/flp0/3073  | NA                       | R01_cb8564_c85405/flp0/3073  | R01_cb8564_c85405/flp0/3073  | R01_cb8564_c85405/flp0/3073  |
| R01_cb14120_c0/flp0/1105     | NA                       | NA                           | NA                           | R01_cb14120_c0/flp0/1105     |
| R01_cb803_c2/flp0/1849       | NA                       | R01_cb803_c2/flp0/1849       | NA                           | NA                           |
| R01_cb16645_c33/flp0/1229    | NA                       | R01_cb16645_c33/flp0/1229    | NA                           | NA                           |
| R01_cb11704_c1/flp0/2570     | NA                       | R01_cb11704_c1/flp0/2570     | NA                           | NA                           |
| R01_cb9617_c13/flp0/1660     | NA                       | NA                           | R01_cb9617_c13/flp0/1660     | R01_cb9617_c13/flp0/1660     |
| R01_cb18556_c1/flp0/1059     | NA                       | NA                           | NA                           | R01_cb18556_c1/flp0/1059     |
| R01_cb12349_c8/flp0/1434     | NA                       | R01_cb12349_c8/flp0/1434     | NA                           | NA                           |
| R01_cb6132_c4/flp0/2723      | NA                       | NA                           | NA                           | R01_cb6132_c4/flp0/2723      |
| R01_cb8564_c70069/flp0/2273  | NA                       | NA                           | NA                           | R01_cb8564_c70069/flp0/2273  |
| R01_cb16196_c1/flp0/1726     | NA                       | R01_cb16196_c1/flp0/1726     | R01_cb16196_c1/flp0/1726     | R01_cb16196_c1/flp0/1726     |
| R01_cb8564_c130103/flp0/2695 | NA                       | NA                           | R01_cb8564_c130103/flp0/2695 | R01_cb8564_c130103/flp0/2695 |
| R01_cb15251_c2/flp0/1559     | NA                       | NA                           | NA                           | R01_cb15251_c2/flp0/1559     |
| R01_cb11441_c1/flp0/2643     | R01_cb11441_c1/flp0/2643 | R01_cb11441_c1/flp0/2643     | R01_cb11441_c1/flp0/2643     | R01_cb11441_c1/flp0/2643     |
| R01_cb2822_c0/f2p1/2683      | R01_cb2822_c0/f2p1/2683  | R01_cb2822_c0/f2p1/2683      | NA                           | NA                           |
| R01_cb8543_c2/flp0/4131      | NA                       | R01_cb8543_c2/flp0/4131      | R01_cb8543_c2/flp0/4131      | NA                           |
| R01_cb2423_c29/flp0/3163     | NA                       | NA                           | R01_cb2423_c29/flp0/3163     | NA                           |
| R01_cb8564_c73565/flp0/2797  | NA                       | R01_cb8564_c73565/flp0/2797  | NA                           | NA                           |
| R01_cb3637_c0/flp0/3571      | NA                       | R01_cb3637_c0/flp0/3571      | NA                           | NA                           |
| R01_cb3732_c19/flp0/2925     | NA                       | NA                           | NA                           | R01_cb3732_c19/flp0/2925     |
| R01_cb6802_c11/flp0/3639     | R01_cb6802_c11/flp0/3639 | R01_cb6802_c11/flp0/3639     | R01_cb6802_c11/flp0/3639     | R01_cb6802_c11/flp0/3639     |
| R01_cb11446_c1/flp0/2790     | NA                       | NA                           | NA                           | R01_cb11446_c1/flp0/2790     |
| R01_cb8564_c87490/flp0/2768  | NA                       | NA                           | NA                           | R01_cb8564_c87490/flp0/2768  |
| R01_cb8564_c112866/flp0/2579 | NA                       | R01_cb8564_c112866/flp0/2579 | NA                           | R01_cb8564_c112866/flp0/2579 |



|                              |                             |                             |                             |                              |
|------------------------------|-----------------------------|-----------------------------|-----------------------------|------------------------------|
| R01_cb8564_c118326/flp0/1878 | NA                          | NA                          | NA                          | R01_cb8564_c118326/flp0/1878 |
| R01_cb15951_c6/flp0/465      | R01_cb15951_c6/flp0/465     | R01_cb15951_c6/flp0/465     | R01_cb15951_c6/flp0/465     | R01_cb15951_c6/flp0/465      |
| R01_cb4708_c8/flp0/1739      | NA                          | R01_cb4708_c8/flp0/1739     | NA                          | NA                           |
| R01_cb11160_c1/flp0/2026     | NA                          | NA                          | R01_cb11160_c1/flp0/2026    | NA                           |
| R01_cb15860_c2/flp0/609      | NA                          | NA                          | NA                          | R01_cb15860_c2/flp0/609      |
| R01_cb7398_c1/flp0/3093      | NA                          | NA                          | NA                          | R01_cb7398_c1/flp0/3093      |
| R01_cb2970_c6/flp0/652       | R01_cb2970_c6/flp0/652      | NA                          | NA                          | R01_cb2970_c6/flp0/652       |
| R01_cb4915_c5/flp0/2344      | NA                          | R01_cb4915_c5/flp0/2344     | NA                          | NA                           |
| R01_cb16078_c7/flp0/420      | R01_cb16078_c7/flp0/420     | R01_cb16078_c7/flp0/420     | R01_cb16078_c7/flp0/420     | NA                           |
| R01_cb18516_c1/flp0/879      | R01_cb18516_c1/flp0/879     | R01_cb18516_c1/flp0/879     | R01_cb18516_c1/flp0/879     | R01_cb18516_c1/flp0/879      |
| R01_cb18456_c7374/flp0/621   | NA                          | R01_cb18456_c7374/flp0/621  | R01_cb18456_c7374/flp0/621  | R01_cb18456_c7374/flp0/621   |
| R01_cb649_c35/flp0/2888      | NA                          | R01_cb649_c35/flp0/2888     | NA                          | NA                           |
| R01_cb4768_c25/flp0/3150     | NA                          | R01_cb4768_c25/flp0/3150    | NA                          | NA                           |
| R01_cb17676_c1/flp0/531      | NA                          | R01_cb17676_c1/flp0/531     | NA                          | R01_cb17676_c1/flp0/531      |
| R01_cb7403_c6/flp0/2070      | NA                          | R01_cb7403_c6/flp0/2070     | NA                          | NA                           |
| R01_cb18456_c5452/flp0/1496  | NA                          | R01_cb18456_c5452/flp0/1496 | NA                          | R01_cb18456_c5452/flp0/1496  |
| R01_cb17372_c1/flp0/546      | NA                          | NA                          | R01_cb17372_c1/flp0/546     | R01_cb17372_c1/flp0/546      |
| R01_cb8564_c88724/flp0/2681  | R01_cb8564_c88724/flp0/2681 | R01_cb8564_c88724/flp0/2681 | R01_cb8564_c88724/flp0/2681 | R01_cb8564_c88724/flp0/2681  |
| R01_cb15168_c1/flp0/1570     | NA                          | NA                          | NA                          | R01_cb15168_c1/flp0/1570     |
| R01_cb7296_c4/flp0/3705      | NA                          | NA                          | NA                          | R01_cb7296_c4/flp0/3705      |
| R01_cb11719_c0/flp0/1370     | NA                          | NA                          | NA                          | R01_cb11719_c0/flp0/1370     |
| R01_cb7899_c1/flp0/2391      | NA                          | NA                          | NA                          | R01_cb7899_c1/flp0/2391      |
| R01_cb13112_c13/flp0/909     | NA                          | NA                          | R01_cb13112_c13/flp0/909    | R01_cb13112_c13/flp0/909     |
| R01_cb8564_c69636/flp0/3820  | R01_cb8564_c69636/flp0/382  | R01_cb8564_c69636/flp0/3820 | NA                          | NA                           |

|                                  |                          |                                  |                                  |                                  |
|----------------------------------|--------------------------|----------------------------------|----------------------------------|----------------------------------|
|                                  | 0                        |                                  |                                  |                                  |
| R01_cb8564_c113069/f1p0/240<br>3 | NA                       | R01_cb8564_c113069/f1p0/240<br>3 | R01_cb8564_c113069/f1p0/240<br>3 | R01_cb8564_c113069/f1p0/240<br>3 |
| R01_cb1298_c3/f1p1/4105          | NA                       | R01_cb1298_c3/f1p1/4105          | R01_cb1298_c3/f1p1/4105          | R01_cb1298_c3/f1p1/4105          |
| R01_cb7030_c8/f1p1/2327          | NA                       | NA                               | NA                               | R01_cb7030_c8/f1p1/2327          |
| R01_cb15568_c3/f1p0/1032         | NA                       | NA                               | NA                               | R01_cb15568_c3/f1p0/1032         |
| R01_cb4141_c5/f1p0/2520          | NA                       | R01_cb4141_c5/f1p0/2520          | NA                               | NA                               |
| R01_cb18456_c1539/f3p2/993       | NA                       | R01_cb18456_c1539/f3p2/993       | NA                               | NA                               |
| R01_cb8507_c2/f1p1/2344          | NA                       | R01_cb8507_c2/f1p1/2344          | NA                               | NA                               |
| R01_cb8564_c69070/f2p0/2710      | NA                       | R01_cb8564_c69070/f2p0/2710      | NA                               | R01_cb8564_c69070/f2p0/2710      |
| R01_cb5480_c2/f1p0/696           | R01_cb5480_c2/f1p0/696   | R01_cb5480_c2/f1p0/696           | R01_cb5480_c2/f1p0/696           | R01_cb5480_c2/f1p0/696           |
| R01_cb625_c2/f1p2/4717           | NA                       | NA                               | NA                               | R01_cb625_c2/f1p2/4717           |
| R01_cb16871_c2/f1p0/1428         | NA                       | NA                               | NA                               | R01_cb16871_c2/f1p0/1428         |
| R01_cb8564_c73920/f1p0/2465      | NA                       | R01_cb8564_c73920/f1p0/2465      | NA                               | R01_cb8564_c73920/f1p0/2465      |
| R01_cb12916_c6/f1p0/671          | NA                       | NA                               | R01_cb12916_c6/f1p0/671          | R01_cb12916_c6/f1p0/671          |
| R01_cb18409_c30/f2p0/442         | NA                       | R01_cb18409_c30/f2p0/442         | R01_cb18409_c30/f2p0/442         | R01_cb18409_c30/f2p0/442         |
| R01_cb2985_c6/f1p0/3392          | NA                       | NA                               | NA                               | R01_cb2985_c6/f1p0/3392          |
| R01_cb18223_c7/f2p2/1729         | NA                       | R01_cb18223_c7/f2p2/1729         | NA                               | R01_cb18223_c7/f2p2/1729         |
| R01_cb8400_c4/f2p0/1858          | NA                       | NA                               | NA                               | R01_cb8400_c4/f2p0/1858          |
| R01_cb12534_c3/f1p0/1065         | R01_cb12534_c3/f1p0/1065 | R01_cb12534_c3/f1p0/1065         | R01_cb12534_c3/f1p0/1065         | R01_cb12534_c3/f1p0/1065         |
| R01_cb8564_c127487/f2p0/224<br>5 | NA                       | NA                               | NA                               | R01_cb8564_c127487/f2p0/224<br>5 |
| R01_cb3517_c6/f1p0/3112          | NA                       | R01_cb3517_c6/f1p0/3112          | NA                               | NA                               |
| R01_cb1935_c25/f1p0/581          | R01_cb1935_c25/f1p0/581  | R01_cb1935_c25/f1p0/581          | NA                               | R01_cb1935_c25/f1p0/581          |
| R01_cb4744_c4/f1p0/1625          | NA                       | R01_cb4744_c4/f1p0/1625          | R01_cb4744_c4/f1p0/1625          | R01_cb4744_c4/f1p0/1625          |
| R01_cb6278_c11/f1p0/2978         | NA                       | R01_cb6278_c11/f1p0/2978         | NA                               | R01_cb6278_c11/f1p0/2978         |

|                              |                            |                             |                            |                              |
|------------------------------|----------------------------|-----------------------------|----------------------------|------------------------------|
| R01_cb12369_c13/flp1/719     | NA                         | NA                          | R01_cb12369_c13/flp1/719   | NA                           |
| R01_cb10106_c6/flp1/965      | NA                         | R01_cb10106_c6/flp1/965     | NA                         | NA                           |
| R01_cb17708_c2/flp0/871      | R01_cb17708_c2/flp0/871    | R01_cb17708_c2/flp0/871     | R01_cb17708_c2/flp0/871    | R01_cb17708_c2/flp0/871      |
| R01_cb8564_c77817/flp0/2256  | NA                         | R01_cb8564_c77817/flp0/2256 | NA                         | NA                           |
| R01_cb10402_c3/flp0/2605     | NA                         | R01_cb10402_c3/flp0/2605    | NA                         | NA                           |
| R01_cb7720_c6/flp0/694       | R01_cb7720_c6/flp0/694     | NA                          | NA                         | R01_cb7720_c6/flp0/694       |
| R01_cb8283_c8/flp0/6712      | NA                         | R01_cb8283_c8/flp0/6712     | NA                         | NA                           |
| R01_cb9346_c1/f2p0/995       | NA                         | NA                          | NA                         | R01_cb9346_c1/f2p0/995       |
| R01_cb18456_c6623/flp0/334   | R01_cb18456_c6623/flp0/334 | R01_cb18456_c6623/flp0/334  | R01_cb18456_c6623/flp0/334 | R01_cb18456_c6623/flp0/334   |
| R01_cb6760_c1/flp0/2583      | NA                         | NA                          | NA                         | R01_cb6760_c1/flp0/2583      |
| R01_cb3601_c8/flp0/2759      | NA                         | R01_cb3601_c8/flp0/2759     | NA                         | NA                           |
| R01_cb4012_c1/flp0/3469      | NA                         | R01_cb4012_c1/flp0/3469     | NA                         | NA                           |
| R01_cb15753_c1/flp0/1641     | R01_cb15753_c1/flp0/1641   | R01_cb15753_c1/flp0/1641    | NA                         | NA                           |
| R01_cb8564_c115122/flp0/2598 | NA                         | NA                          | NA                         | R01_cb8564_c115122/flp0/2598 |
| R01_cb3483_c26/f7p1/2926     | NA                         | NA                          | NA                         | R01_cb3483_c26/f7p1/2926     |
| R01_cb12603_c5/f3p0/1448     | NA                         | NA                          | R01_cb12603_c5/f3p0/1448   | R01_cb12603_c5/f3p0/1448     |
| R01_cb15030_c2/f2p0/1420     | NA                         | NA                          | NA                         | R01_cb15030_c2/f2p0/1420     |
| R01_cb3294_c1/flp0/3292      | NA                         | NA                          | NA                         | R01_cb3294_c1/flp0/3292      |
| R01_cb11368_c0/f2p0/604      | NA                         | NA                          | NA                         | R01_cb11368_c0/f2p0/604      |
| R01_cb9472_c4/flp0/1359      | NA                         | NA                          | NA                         | R01_cb9472_c4/flp0/1359      |
| R01_cb8564_c90571/flp0/3114  | NA                         | R01_cb8564_c90571/flp0/3114 | NA                         | R01_cb8564_c90571/flp0/3114  |
| R01_cb16521_c0/flp0/1199     | NA                         | NA                          | NA                         | R01_cb16521_c0/flp0/1199     |
| R01_cb16447_c2/flp1/992      | NA                         | NA                          | NA                         | R01_cb16447_c2/flp1/992      |
| R01_cb15811_c28/flp0/1054    | NA                         | R01_cb15811_c28/flp0/1054   | R01_cb15811_c28/flp0/1054  | R01_cb15811_c28/flp0/1054    |
| R01_cb260_c10/flp0/4722      | NA                         | NA                          | NA                         | R01_cb260_c10/flp0/4722      |

|                              |                              |                              |                              |                              |
|------------------------------|------------------------------|------------------------------|------------------------------|------------------------------|
| R01_cb8564_c1257/flp0/4087   | NA                           | R01_cb8564_c1257/flp0/4087   | R01_cb8564_c1257/flp0/4087   | NA                           |
| R01_cb8564_c90498/flp0/3794  | NA                           | R01_cb8564_c90498/flp0/3794  | NA                           | NA                           |
| R01_cb7100_c1/flp0/2838      | R01_cb7100_c1/flp0/2838      | R01_cb7100_c1/flp0/2838      | R01_cb7100_c1/flp0/2838      | R01_cb7100_c1/flp0/2838      |
| R01_cb15915_c1/flp0/757      | NA                           | R01_cb15915_c1/flp0/757      | R01_cb15915_c1/flp0/757      | R01_cb15915_c1/flp0/757      |
| R01_cb3099_c0/f2p1/3378      | R01_cb3099_c0/f2p1/3378      | R01_cb3099_c0/f2p1/3378      | R01_cb3099_c0/f2p1/3378      | R01_cb3099_c0/f2p1/3378      |
| R01_cb4047_c12/flp0/2852     | NA                           | NA                           | NA                           | R01_cb4047_c12/flp0/2852     |
| R01_cb8564_c10722/flp0/2907  | NA                           | R01_cb8564_c10722/flp0/2907  | NA                           | R01_cb8564_c10722/flp0/2907  |
| R01_cb13136_c13/flp1/857     | NA                           | R01_cb13136_c13/flp1/857     | NA                           | NA                           |
| R01_cb13737_c2/flp0/1861     | R01_cb13737_c2/flp0/1861     | R01_cb13737_c2/flp0/1861     | NA                           | NA                           |
| R01_cb6163_c22/flp0/953      | NA                           | R01_cb6163_c22/flp0/953      | NA                           | NA                           |
| R01_cb10010_c1/flp0/2391     | NA                           | R01_cb10010_c1/flp0/2391     | NA                           | R01_cb10010_c1/flp0/2391     |
| R01_cb10778_c3/flp0/858      | NA                           | R01_cb10778_c3/flp0/858      | NA                           | NA                           |
| R01_cb18691_c3/flp0/748      | R01_cb18691_c3/flp0/748      | R01_cb18691_c3/flp0/748      | NA                           | R01_cb18691_c3/flp0/748      |
| R01_cb17973_c4/f3p0/755      | R01_cb17973_c4/f3p0/755      | R01_cb17973_c4/f3p0/755      | R01_cb17973_c4/f3p0/755      | R01_cb17973_c4/f3p0/755      |
| R01_cb8564_c129513/flp0/2758 | R01_cb8564_c129513/flp0/2758 | R01_cb8564_c129513/flp0/2758 | R01_cb8564_c129513/flp0/2758 | R01_cb8564_c129513/flp0/2758 |
| R01_cb8625_c2/flp0/5358      | NA                           | R01_cb8625_c2/flp0/5358      | NA                           | NA                           |
| R01_cb8564_c18629/flp0/3619  | R01_cb8564_c18629/flp0/3619  | R01_cb8564_c18629/flp0/3619  | R01_cb8564_c18629/flp0/3619  | R01_cb8564_c18629/flp0/3619  |
| R01_cb8564_c34660/flp0/2579  | NA                           | R01_cb8564_c34660/flp0/2579  | NA                           | R01_cb8564_c34660/flp0/2579  |
| R01_cb15934_c2/flp0/566      | NA                           | R01_cb15934_c2/flp0/566      | NA                           | R01_cb15934_c2/flp0/566      |
| R01_cb14141_c0/flp0/745      | R01_cb14141_c0/flp0/745      | R01_cb14141_c0/flp0/745      | R01_cb14141_c0/flp0/745      | R01_cb14141_c0/flp0/745      |
| R01_cb8564_c9783/f2p3/3332   | NA                           | NA                           | NA                           | R01_cb8564_c9783/f2p3/3332   |
| R01_cb5007_c6/flp0/2296      | R01_cb5007_c6/flp0/2296      | R01_cb5007_c6/flp0/2296      | NA                           | NA                           |
| R01_cb18456_c7439/flp0/658   | NA                           | R01_cb18456_c7439/flp0/658   | R01_cb18456_c7439/flp0/658   | R01_cb18456_c7439/flp0/658   |
| R01_cb2602_c6/flp0/2468      | NA                           | NA                           | NA                           | R01_cb2602_c6/flp0/2468      |

|                             |                          |                             |                             |                             |
|-----------------------------|--------------------------|-----------------------------|-----------------------------|-----------------------------|
| R01_cb4469_c3/f1p0/2816     | NA                       | R01_cb4469_c3/f1p0/2816     | NA                          | R01_cb4469_c3/f1p0/2816     |
| R01_cb8564_c88848/f2p0/2346 | NA                       | NA                          | R01_cb8564_c88848/f2p0/2346 | R01_cb8564_c88848/f2p0/2346 |
| R01_cb12493_c6/f1p0/722     | R01_cb12493_c6/f1p0/722  | R01_cb12493_c6/f1p0/722     | R01_cb12493_c6/f1p0/722     | R01_cb12493_c6/f1p0/722     |
| R01_cb5471_c12/f1p0/2589    | NA                       | NA                          | NA                          | R01_cb5471_c12/f1p0/2589    |
| R01_cb17723_c1/f1p0/713     | NA                       | NA                          | R01_cb17723_c1/f1p0/713     | NA                          |
| R01_cb16275_c0/f3p0/350     | R01_cb16275_c0/f3p0/350  | R01_cb16275_c0/f3p0/350     | NA                          | NA                          |
| R01_cb5204_c19/f1p0/1994    | NA                       | R01_cb5204_c19/f1p0/1994    | NA                          | R01_cb5204_c19/f1p0/1994    |
| R01_cb10917_c4/f1p0/988     | NA                       | NA                          | NA                          | R01_cb10917_c4/f1p0/988     |
| R01_cb8564_c72951/f1p0/2113 | NA                       | R01_cb8564_c72951/f1p0/2113 | R01_cb8564_c72951/f1p0/2113 | R01_cb8564_c72951/f1p0/2113 |
| R01_cb11283_c1/f1p0/2431    | NA                       | R01_cb11283_c1/f1p0/2431    | NA                          | NA                          |
| R01_cb17043_c2/f1p0/869     | NA                       | NA                          | NA                          | R01_cb17043_c2/f1p0/869     |
| R01_cb8564_c10756/f1p0/3899 | NA                       | R01_cb8564_c10756/f1p0/3899 | NA                          | NA                          |
| R01_cb4469_c5/f1p0/2979     | NA                       | NA                          | NA                          | R01_cb4469_c5/f1p0/2979     |
| R01_cb12462_c37/f1p0/520    | R01_cb12462_c37/f1p0/520 | R01_cb12462_c37/f1p0/520    | NA                          | NA                          |
| R01_cb8564_c17474/f1p0/2545 | NA                       | NA                          | NA                          | R01_cb8564_c17474/f1p0/2545 |
| R01_cb6608_c2/f2p0/3012     | NA                       | NA                          | NA                          | R01_cb6608_c2/f2p0/3012     |
| R01_cb16290_c0/f1p0/1541    | R01_cb16290_c0/f1p0/1541 | R01_cb16290_c0/f1p0/1541    | R01_cb16290_c0/f1p0/1541    | R01_cb16290_c0/f1p0/1541    |
| R01_cb6631_c34/f4p0/2329    | NA                       | NA                          | NA                          | R01_cb6631_c34/f4p0/2329    |
| R01_cb8564_c39348/f1p0/2953 | NA                       | R01_cb8564_c39348/f1p0/2953 | NA                          | NA                          |
| R01_cb11294_c3/f1p0/918     | R01_cb11294_c3/f1p0/918  | R01_cb11294_c3/f1p0/918     | NA                          | R01_cb11294_c3/f1p0/918     |
| R01_cb8564_c126557/f1p0/386 | NA                       | R01_cb8564_c126557/f1p0/386 | R01_cb8564_c126557/f1p0/386 | NA                          |
| 7                           |                          | 7                           | 7                           |                             |
| R01_cb8564_c121187/f1p0/315 | NA                       | R01_cb8564_c121187/f1p0/315 | R01_cb8564_c121187/f1p0/315 | R01_cb8564_c121187/f1p0/315 |
| 8                           |                          | 8                           | 8                           | 8                           |
| R01_cb8564_c35375/f1p0/3135 | NA                       | R01_cb8564_c35375/f1p0/3135 | NA                          | NA                          |
| R01_cb16627_c0/f2p0/605     | R01_cb16627_c0/f2p0/605  | R01_cb16627_c0/f2p0/605     | R01_cb16627_c0/f2p0/605     | R01_cb16627_c0/f2p0/605     |

|                              |                            |                             |                             |                              |
|------------------------------|----------------------------|-----------------------------|-----------------------------|------------------------------|
| R01_cb1658_c45/flp0/3017     | NA                         | NA                          | NA                          | R01_cb1658_c45/flp0/3017     |
| R01_cb17243_c0/f2p0/1442     | NA                         | NA                          | NA                          | R01_cb17243_c0/f2p0/1442     |
| R01_cb18456_c7152/flp0/470   | R01_cb18456_c7152/flp0/470 | R01_cb18456_c7152/flp0/470  | R01_cb18456_c7152/flp0/470  | R01_cb18456_c7152/flp0/470   |
| R01_cb16612_c1/flp0/571      | NA                         | R01_cb16612_c1/flp0/571     | NA                          | NA                           |
| R01_cb17843_c0/flp0/1175     | NA                         | R01_cb17843_c0/flp0/1175    | NA                          | NA                           |
| R01_cb8564_c80680/flp0/3535  | NA                         | R01_cb8564_c80680/flp0/3535 | R01_cb8564_c80680/flp0/3535 | NA                           |
| R01_cb14092_c0/f3p0/1278     | NA                         | NA                          | NA                          | R01_cb14092_c0/f3p0/1278     |
| R01_cb3415_c5/flp1/3345      | NA                         | R01_cb3415_c5/flp1/3345     | NA                          | NA                           |
| R01_cb13772_c7/flp0/393      | R01_cb13772_c7/flp0/393    | R01_cb13772_c7/flp0/393     | R01_cb13772_c7/flp0/393     | R01_cb13772_c7/flp0/393      |
| R01_cb14610_c1/f2p0/717      | NA                         | R01_cb14610_c1/f2p0/717     | R01_cb14610_c1/f2p0/717     | R01_cb14610_c1/f2p0/717      |
| R01_cb8823_c6/flp2/2056      | NA                         | NA                          | NA                          | R01_cb8823_c6/flp2/2056      |
| R01_cb4812_c17/flp0/3187     | NA                         | R01_cb4812_c17/flp0/3187    | NA                          | NA                           |
| R01_cb8564_c72890/flp0/3768  | NA                         | R01_cb8564_c72890/flp0/3768 | R01_cb8564_c72890/flp0/3768 | R01_cb8564_c72890/flp0/3768  |
| R01_cb4625_c0/flp0/3299      | NA                         | R01_cb4625_c0/flp0/3299     | NA                          | NA                           |
| R01_cb2252_c0/f2p0/1094      | NA                         | NA                          | NA                          | R01_cb2252_c0/f2p0/1094      |
| R01_cb8101_c9/flp0/2203      | NA                         | NA                          | NA                          | R01_cb8101_c9/flp0/2203      |
| R01_cb13462_c0/f2p1/1761     | NA                         | NA                          | NA                          | R01_cb13462_c0/f2p1/1761     |
| R01_cb8564_c114038/flp1/2194 | NA                         | NA                          | NA                          | R01_cb8564_c114038/flp1/2194 |
| R01_cb10970_c8/flp0/1458     | NA                         | NA                          | NA                          | R01_cb10970_c8/flp0/1458     |
| R01_cb2588_c5/flp0/471       | NA                         | R01_cb2588_c5/flp0/471      | R01_cb2588_c5/flp0/471      | R01_cb2588_c5/flp0/471       |
| R01_cb3177_c2/flp0/2605      | NA                         | NA                          | NA                          | R01_cb3177_c2/flp0/2605      |
| R01_cb7862_c4/flp0/685       | R01_cb7862_c4/flp0/685     | R01_cb7862_c4/flp0/685      | R01_cb7862_c4/flp0/685      | R01_cb7862_c4/flp0/685       |
| R01_cb8564_c10548/flp0/2939  | NA                         | R01_cb8564_c10548/flp0/2939 | NA                          | NA                           |
| R01_cb8564_c35315/flp0/2351  | NA                         | R01_cb8564_c35315/flp0/2351 | NA                          | NA                           |
| R01_cb9935_c1/flp0/2069      | NA                         | NA                          | NA                          | R01_cb9935_c1/flp0/2069      |

|                             |                            |                             |                           |                             |
|-----------------------------|----------------------------|-----------------------------|---------------------------|-----------------------------|
| R01_cb18195_c1/f1p0/788     | R01_cb18195_c1/f1p0/788    | R01_cb18195_c1/f1p0/788     | R01_cb18195_c1/f1p0/788   | R01_cb18195_c1/f1p0/788     |
| R01_cb16629_c3/f3p0/890     | NA                         | R01_cb16629_c3/f3p0/890     | NA                        | R01_cb16629_c3/f3p0/890     |
| R01_cb7999_c3/f1p0/1060     | NA                         | NA                          | NA                        | R01_cb7999_c3/f1p0/1060     |
| R01_cb8564_c78582/f1p0/3106 | NA                         | R01_cb8564_c78582/f1p0/3106 | NA                        | R01_cb8564_c78582/f1p0/3106 |
| R01_cb14023_c0/f3p0/870     | NA                         | NA                          | NA                        | R01_cb14023_c0/f3p0/870     |
| R01_cb18409_c181/f1p0/352   | R01_cb18409_c181/f1p0/352  | R01_cb18409_c181/f1p0/352   | R01_cb18409_c181/f1p0/352 | R01_cb18409_c181/f1p0/352   |
| R01_cb15448_c0/f2p0/583     | NA                         | R01_cb15448_c0/f2p0/583     | R01_cb15448_c0/f2p0/583   | R01_cb15448_c0/f2p0/583     |
| R01_cb11352_c3/f1p0/1019    | NA                         | R01_cb11352_c3/f1p0/1019    | NA                        | NA                          |
| R01_cb13590_c1/f3p0/914     | NA                         | R01_cb13590_c1/f3p0/914     | R01_cb13590_c1/f3p0/914   | R01_cb13590_c1/f3p0/914     |
| R01_cb8564_c83616/f1p0/2570 | NA                         | NA                          | NA                        | R01_cb8564_c83616/f1p0/2570 |
| R01_cb8564_c3687/f1p0/1995  | NA                         | R01_cb8564_c3687/f1p0/1995  | NA                        | NA                          |
| R01_cb8564_c17515/f1p4/4103 | NA                         | NA                          | NA                        | R01_cb8564_c17515/f1p4/4103 |
| R01_cb1190_c12/f1p0/3276    | NA                         | NA                          | NA                        | R01_cb1190_c12/f1p0/3276    |
| R01_cb3732_c29/f1p1/2731    | NA                         | NA                          | NA                        | R01_cb3732_c29/f1p1/2731    |
| R01_cb5249_c2/f2p0/1894     | NA                         | NA                          | NA                        | R01_cb5249_c2/f2p0/1894     |
| R01_cb5482_c5/f1p1/2990     | NA                         | R01_cb5482_c5/f1p1/2990     | NA                        | NA                          |
| R01_cb119_c18/f1p1/3694     | NA                         | NA                          | NA                        | R01_cb119_c18/f1p1/3694     |
| R01_cb69_c31/f4p0/3533      | NA                         | NA                          | NA                        | R01_cb69_c31/f4p0/3533      |
| R01_cb5486_c6/f1p0/1322     | R01_cb5486_c6/f1p0/1322    | R01_cb5486_c6/f1p0/1322     | R01_cb5486_c6/f1p0/1322   | R01_cb5486_c6/f1p0/1322     |
| R01_cb16303_c6/f1p0/1732    | NA                         | NA                          | NA                        | R01_cb16303_c6/f1p0/1732    |
| R01_cb18456_c7952/f4p2/501  | R01_cb18456_c7952/f4p2/501 | R01_cb18456_c7952/f4p2/501  | NA                        | NA                          |
| R01_cb10024_c261/f1p0/751   | NA                         | NA                          | R01_cb10024_c261/f1p0/751 | NA                          |
| R01_cb16278_c0/f1p0/1726    | NA                         | R01_cb16278_c0/f1p0/1726    | NA                        | R01_cb16278_c0/f1p0/1726    |
| R01_cb1240_c26/f1p0/2985    | NA                         | NA                          | NA                        | R01_cb1240_c26/f1p0/2985    |
| R01_cb11447_c1/f1p0/2166    | NA                         | R01_cb11447_c1/f1p0/2166    | NA                        | NA                          |
| R01_cb12636_c1/f4p0/1521    | NA                         | NA                          | NA                        | R01_cb12636_c1/f4p0/1521    |

|                              |                             |                             |                              |                              |
|------------------------------|-----------------------------|-----------------------------|------------------------------|------------------------------|
| R01_cb18024_c1/flp0/1090     | NA                          | R01_cb18024_c1/flp0/1090    | NA                           | R01_cb18024_c1/flp0/1090     |
| R01_cb8564_c22943/flp0/3151  | NA                          | R01_cb8564_c22943/flp0/3151 | NA                           | NA                           |
| R01_cb8564_c3667/flp0/2932   | NA                          | NA                          | NA                           | R01_cb8564_c3667/flp0/2932   |
| R01_cb7219_c13/flp4/2473     | NA                          | NA                          | NA                           | R01_cb7219_c13/flp4/2473     |
| R01_cb10080_c14/flp0/647     | NA                          | R01_cb10080_c14/flp0/647    | NA                           | NA                           |
| R01_cb13953_c18/flp1/870     | R01_cb13953_c18/flp1/870    | R01_cb13953_c18/flp1/870    | NA                           | NA                           |
| R01_cb10670_c3/f3p0/1012     | NA                          | R01_cb10670_c3/f3p0/1012    | NA                           | NA                           |
| R01_cb7632_c25/flp0/1333     | NA                          | R01_cb7632_c25/flp0/1333    | NA                           | NA                           |
| R01_cb8564_c115387/flp0/2236 | NA                          | NA                          | R01_cb8564_c115387/flp0/2236 | R01_cb8564_c115387/flp0/2236 |
| R01_cb7530_c14/f4p0/2450     | NA                          | NA                          | NA                           | R01_cb7530_c14/f4p0/2450     |
| R01_cb10034_c40/flp0/622     | NA                          | R01_cb10034_c40/flp0/622    | NA                           | NA                           |
| R01_cb17177_c0/f2p0/674      | NA                          | R01_cb17177_c0/f2p0/674     | NA                           | R01_cb17177_c0/f2p0/674      |
| R01_cb8564_c45266/flp0/2129  | NA                          | R01_cb8564_c45266/flp0/2129 | R01_cb8564_c45266/flp0/2129  | R01_cb8564_c45266/flp0/2129  |
| R01_cb8564_c76809/flp0/2176  | R01_cb8564_c76809/flp0/2176 | R01_cb8564_c76809/flp0/2176 | NA                           | NA                           |
| R01_cb17052_c8/flp0/1618     | NA                          | NA                          | NA                           | R01_cb17052_c8/flp0/1618     |
| R01_cb7457_c1/flp0/2610      | R01_cb7457_c1/flp0/2610     | NA                          | NA                           | NA                           |
| R01_cb6959_c2/flp0/2602      | NA                          | NA                          | NA                           | R01_cb6959_c2/flp0/2602      |
| R01_cb13809_c5/flp0/5551     | R01_cb13809_c5/flp0/5551    | R01_cb13809_c5/flp0/5551    | R01_cb13809_c5/flp0/5551     | R01_cb13809_c5/flp0/5551     |
| R01_cb11354_c2/f2p0/1657     | NA                          | NA                          | NA                           | R01_cb11354_c2/f2p0/1657     |
| R01_cb3239_c0/flp0/3675      | NA                          | R01_cb3239_c0/flp0/3675     | NA                           | NA                           |
| R01_cb16068_c0/f2p0/468      | NA                          | R01_cb16068_c0/f2p0/468     | NA                           | R01_cb16068_c0/f2p0/468      |
| R01_cb10286_c1/flp0/2334     | R01_cb10286_c1/flp0/2334    | R01_cb10286_c1/flp0/2334    | R01_cb10286_c1/flp0/2334     | R01_cb10286_c1/flp0/2334     |
| R01_cb12769_c1/flp0/1333     | NA                          | NA                          | NA                           | R01_cb12769_c1/flp0/1333     |
| R01_cb16410_c1/flp0/623      | NA                          | NA                          | NA                           | R01_cb16410_c1/flp0/623      |



|                              |                             |                              |                             |                             |
|------------------------------|-----------------------------|------------------------------|-----------------------------|-----------------------------|
| R01_cb8131_c0/flp0/2456      | NA                          | R01_cb8131_c0/flp0/2456      | NA                          | R01_cb8131_c0/flp0/2456     |
| R01_cb1998_c0/flp0/4047      | NA                          | R01_cb1998_c0/flp0/4047      | R01_cb1998_c0/flp0/4047     | R01_cb1998_c0/flp0/4047     |
| R01_cb8564_c17591/flp0/3912  | NA                          | NA                           | R01_cb8564_c17591/flp0/3912 | R01_cb8564_c17591/flp0/3912 |
| R01_cb3563_c1/flp0/3434      | NA                          | R01_cb3563_c1/flp0/3434      | NA                          | R01_cb3563_c1/flp0/3434     |
| R01_cb480_c4/flp0/5717       | NA                          | NA                           | NA                          | R01_cb480_c4/flp0/5717      |
| R01_cb12439_c0/f9p0/551      | R01_cb12439_c0/f9p0/551     | NA                           | NA                          | NA                          |
| R01_cb3565_c8/flp0/1986      | NA                          | R01_cb3565_c8/flp0/1986      | NA                          | NA                          |
| R01_cb3492_c0/flp0/3604      | NA                          | R01_cb3492_c0/flp0/3604      | NA                          | NA                          |
| R01_cb8564_c84336/flp0/3480  | NA                          | R01_cb8564_c84336/flp0/3480  | NA                          | R01_cb8564_c84336/flp0/3480 |
| R01_cb18456_c1674/f2p0/1614  | R01_cb18456_c1674/f2p0/1614 | R01_cb18456_c1674/f2p0/1614  | NA                          | NA                          |
| R01_cb16124_c2/flp0/577      | NA                          | NA                           | R01_cb16124_c2/flp0/577     | R01_cb16124_c2/flp0/577     |
| R01_cb8564_c125814/flp0/2108 | NA                          | R01_cb8564_c125814/flp0/2108 | NA                          | NA                          |
| R01_cb17587_c0/flp0/1830     | NA                          | R01_cb17587_c0/flp0/1830     | R01_cb17587_c0/flp0/1830    | R01_cb17587_c0/flp0/1830    |
| R01_cb18132_c21/flp0/1119    | NA                          | R01_cb18132_c21/flp0/1119    | NA                          | R01_cb18132_c21/flp0/1119   |
| R01_cb7298_c2/flp0/3839      | R01_cb7298_c2/flp0/3839     | R01_cb7298_c2/flp0/3839      | R01_cb7298_c2/flp0/3839     | R01_cb7298_c2/flp0/3839     |
| R01_cb12634_c21/flp0/5456    | NA                          | R01_cb12634_c21/flp0/5456    | NA                          | NA                          |
| R01_cb14426_c5/flp0/521      | R01_cb14426_c5/flp0/521     | R01_cb14426_c5/flp0/521      | R01_cb14426_c5/flp0/521     | R01_cb14426_c5/flp0/521     |
| R01_cb12273_c9/f2p0/1670     | NA                          | NA                           | NA                          | R01_cb12273_c9/f2p0/1670    |
| R01_cb1297_c16/flp0/3576     | NA                          | NA                           | NA                          | R01_cb1297_c16/flp0/3576    |
| R01_cb8564_c69570/flp0/2852  | R01_cb8564_c69570/flp0/2852 | R01_cb8564_c69570/flp0/2852  | R01_cb8564_c69570/flp0/2852 | R01_cb8564_c69570/flp0/2852 |
| R01_cb18456_c6452/flp0/790   | NA                          | R01_cb18456_c6452/flp0/790   | NA                          | R01_cb18456_c6452/flp0/790  |
| R01_cb8564_c84364/flp0/2726  | NA                          | R01_cb8564_c84364/flp0/2726  | NA                          | NA                          |
| R01_cb8564_c88117/flp0/2677  | NA                          | R01_cb8564_c88117/flp0/2677  | NA                          | R01_cb8564_c88117/flp0/2677 |

|                             |                          |                             |                            |                             |
|-----------------------------|--------------------------|-----------------------------|----------------------------|-----------------------------|
| R01_cb10015_c202/flp0/574   | NA                       | R01_cb10015_c202/flp0/574   | NA                         | NA                          |
| R01_cb12376_c38/flp0/484    | R01_cb12376_c38/flp0/484 | R01_cb12376_c38/flp0/484    | R01_cb12376_c38/flp0/484   | R01_cb12376_c38/flp0/484    |
| R01_cb4523_c2/flp0/3049     | NA                       | R01_cb4523_c2/flp0/3049     | NA                         | NA                          |
| R01_cb2082_c14/flp0/3023    | NA                       | NA                          | NA                         | R01_cb2082_c14/flp0/3023    |
| R01_cb9154_c9/flp1/1598     | NA                       | NA                          | NA                         | R01_cb9154_c9/flp1/1598     |
| R01_cb535_c5/flp0/4656      | NA                       | NA                          | NA                         | R01_cb535_c5/flp0/4656      |
| R01_cb11561_c1/flp0/2126    | NA                       | NA                          | R01_cb11561_c1/flp0/2126   | R01_cb11561_c1/flp0/2126    |
| R01_cb3138_c2/flp0/3706     | NA                       | NA                          | NA                         | R01_cb3138_c2/flp0/3706     |
| R01_cb10579_c0/f4p0/993     | NA                       | NA                          | NA                         | R01_cb10579_c0/f4p0/993     |
| R01_cb16482_c0/f3p0/1005    | NA                       | R01_cb16482_c0/f3p0/1005    | NA                         | NA                          |
| R01_cb9772_c4/flp0/3466     | NA                       | NA                          | NA                         | R01_cb9772_c4/flp0/3466     |
| R01_cb7533_c5/flp0/2459     | NA                       | NA                          | NA                         | R01_cb7533_c5/flp0/2459     |
| R01_cb9645_c5/flp0/1426     | NA                       | R01_cb9645_c5/flp0/1426     | NA                         | NA                          |
| R01_cb261_c16/flp0/3480     | NA                       | NA                          | NA                         | R01_cb261_c16/flp0/3480     |
| R01_cb8692_c2/flp0/2298     | NA                       | R01_cb8692_c2/flp0/2298     | NA                         | NA                          |
| R01_cb15423_c1/flp0/676     | NA                       | R01_cb15423_c1/flp0/676     | R01_cb15423_c1/flp0/676    | R01_cb15423_c1/flp0/676     |
| R01_cb18456_c1636/f2p0/378  | NA                       | NA                          | R01_cb18456_c1636/f2p0/378 | R01_cb18456_c1636/f2p0/378  |
| R01_cb8568_c11/flp0/3987    | NA                       | R01_cb8568_c11/flp0/3987    | NA                         | NA                          |
| R01_cb2104_c16/flp0/5389    | NA                       | R01_cb2104_c16/flp0/5389    | R01_cb2104_c16/flp0/5389   | R01_cb2104_c16/flp0/5389    |
| R01_cb6206_c4/flp0/1854     | NA                       | R01_cb6206_c4/flp0/1854     | R01_cb6206_c4/flp0/1854    | NA                          |
| R01_cb2033_c22/flp0/2340    | NA                       | NA                          | R01_cb2033_c22/flp0/2340   | R01_cb2033_c22/flp0/2340    |
| R01_cb929_c2/flp0/3360      | NA                       | NA                          | NA                         | R01_cb929_c2/flp0/3360      |
| R01_cb6644_c0/flp0/2829     | R01_cb6644_c0/flp0/2829  | R01_cb6644_c0/flp0/2829     | NA                         | NA                          |
| R01_cb8564_c148557/flp5/280 | NA                       | R01_cb8564_c148557/flp5/280 | NA                         | R01_cb8564_c148557/flp5/280 |
| 2                           |                          | 2                           |                            | 2                           |
| R01_cb261_c18/flp0/2497     | NA                       | NA                          | NA                         | R01_cb261_c18/flp0/2497     |

|                             |                            |                             |                             |                             |
|-----------------------------|----------------------------|-----------------------------|-----------------------------|-----------------------------|
| R01_cb16921_c1/flp0/1624    | R01_cb16921_c1/flp0/1624   | R01_cb16921_c1/flp0/1624    | R01_cb16921_c1/flp0/1624    | R01_cb16921_c1/flp0/1624    |
| R01_cb302_c9/flp2/3522      | NA                         | NA                          | NA                          | R01_cb302_c9/flp2/3522      |
| R01_cb18456_c6853/flp0/1477 | NA                         | R01_cb18456_c6853/flp0/1477 | NA                          | R01_cb18456_c6853/flp0/1477 |
| R01_cb15252_c3/flp0/1653    | NA                         | NA                          | NA                          | R01_cb15252_c3/flp0/1653    |
| R01_cb1388_c2/f2p0/4190     | NA                         | NA                          | NA                          | R01_cb1388_c2/f2p0/4190     |
| R01_cb1116_c1/flp0/2904     | NA                         | NA                          | NA                          | R01_cb1116_c1/flp0/2904     |
| R01_cb18456_c6124/flp0/703  | NA                         | NA                          | NA                          | R01_cb18456_c6124/flp0/703  |
| R01_cb10417_c3/flp0/783     | NA                         | R01_cb10417_c3/flp0/783     | NA                          | NA                          |
| R01_cb16264_c11/flp0/1258   | NA                         | NA                          | R01_cb16264_c11/flp0/1258   | R01_cb16264_c11/flp0/1258   |
| R01_cb16118_c3/flp0/1328    | NA                         | NA                          | NA                          | R01_cb16118_c3/flp0/1328    |
| R01_cb225_c3/flp0/4583      | NA                         | NA                          | NA                          | R01_cb225_c3/flp0/4583      |
| R01_cb8388_c6/flp0/2230     | NA                         | R01_cb8388_c6/flp0/2230     | NA                          | R01_cb8388_c6/flp0/2230     |
| R01_cb647_c12/flp0/4491     | NA                         | R01_cb647_c12/flp0/4491     | NA                          | R01_cb647_c12/flp0/4491     |
| R01_cb6188_c1/flp0/2716     | R01_cb6188_c1/flp0/2716    | R01_cb6188_c1/flp0/2716     | R01_cb6188_c1/flp0/2716     | R01_cb6188_c1/flp0/2716     |
| R01_cb18602_c1/flp0/833     | R01_cb18602_c1/flp0/833    | R01_cb18602_c1/flp0/833     | R01_cb18602_c1/flp0/833     | R01_cb18602_c1/flp0/833     |
| R01_cb2382_c9/flp0/5169     | NA                         | NA                          | NA                          | R01_cb2382_c9/flp0/5169     |
| R01_cb13073_c0/flp0/920     | NA                         | R01_cb13073_c0/flp0/920     | NA                          | R01_cb13073_c0/flp0/920     |
| R01_cb1706_c0/f4p0/2938     | NA                         | NA                          | NA                          | R01_cb1706_c0/f4p0/2938     |
| R01_cb10074_c7/f3p4/608     | R01_cb10074_c7/f3p4/608    | R01_cb10074_c7/f3p4/608     | R01_cb10074_c7/f3p4/608     | R01_cb10074_c7/f3p4/608     |
| R01_cb8250_c1/flp0/3163     | NA                         | NA                          | R01_cb8250_c1/flp0/3163     | R01_cb8250_c1/flp0/3163     |
| R01_cb17623_c1/flp0/683     | NA                         | NA                          | NA                          | R01_cb17623_c1/flp0/683     |
| R01_cb18456_c6378/flp0/477  | R01_cb18456_c6378/flp0/477 | R01_cb18456_c6378/flp0/477  | NA                          | R01_cb18456_c6378/flp0/477  |
| R01_cb3344_c6/flp0/2126     | NA                         | NA                          | NA                          | R01_cb3344_c6/flp0/2126     |
| R01_cb12577_c14/flp0/748    | NA                         | NA                          | R01_cb12577_c14/flp0/748    | R01_cb12577_c14/flp0/748    |
| R01_cb8564_c48394/flp0/2949 | NA                         | R01_cb8564_c48394/flp0/2949 | R01_cb8564_c48394/flp0/2949 | R01_cb8564_c48394/flp0/2949 |
| R01_cb4368_c4/f2p0/1323     | NA                         | NA                          | NA                          | R01_cb4368_c4/f2p0/1323     |

|                             |                            |                             |                             |                             |
|-----------------------------|----------------------------|-----------------------------|-----------------------------|-----------------------------|
| R01_cb15121_c0/flp0/741     | R01_cb15121_c0/flp0/741    | R01_cb15121_c0/flp0/741     | R01_cb15121_c0/flp0/741     | R01_cb15121_c0/flp0/741     |
| R01_cb3848_c11/flp0/2441    | NA                         | NA                          | NA                          | R01_cb3848_c11/flp0/2441    |
| R01_cb1228_c50/flp0/1639    | NA                         | R01_cb1228_c50/flp0/1639    | NA                          | R01_cb1228_c50/flp0/1639    |
| R01_cb5824_c8/flp0/2111     | NA                         | NA                          | NA                          | R01_cb5824_c8/flp0/2111     |
| R01_cb2875_c11/flp0/3661    | NA                         | NA                          | NA                          | R01_cb2875_c11/flp0/3661    |
| R01_cb8564_c18123/flp0/2458 | NA                         | NA                          | NA                          | R01_cb8564_c18123/flp0/2458 |
| R01_cb8564_c4689/flp0/4442  | R01_cb8564_c4689/flp0/4442 | R01_cb8564_c4689/flp0/4442  | R01_cb8564_c4689/flp0/4442  | NA                          |
| R01_cb9521_c6/flp0/4198     | NA                         | R01_cb9521_c6/flp0/4198     | NA                          | NA                          |
| R01_cb12368_c5/flp0/373     | R01_cb12368_c5/flp0/373    | R01_cb12368_c5/flp0/373     | R01_cb12368_c5/flp0/373     | R01_cb12368_c5/flp0/373     |
| R01_cb8564_c23652/flp0/2627 | NA                         | R01_cb8564_c23652/flp0/2627 | NA                          | R01_cb8564_c23652/flp0/2627 |
| R01_cb16416_c1/flp0/1209    | NA                         | NA                          | NA                          | R01_cb16416_c1/flp0/1209    |
| R01_cb8564_c87040/flp0/2238 | NA                         | NA                          | NA                          | R01_cb8564_c87040/flp0/2238 |
| R01_cb8564_c77137/flp0/3949 | NA                         | R01_cb8564_c77137/flp0/3949 | NA                          | NA                          |
| R01_cb17744_c33/flp0/1153   | NA                         | R01_cb17744_c33/flp0/1153   | NA                          | R01_cb17744_c33/flp0/1153   |
| R01_cb10231_c2/flp0/1191    | NA                         | NA                          | NA                          | R01_cb10231_c2/flp0/1191    |
| R01_cb15273_c8/f4p1/761     | NA                         | NA                          | R01_cb15273_c8/f4p1/761     | R01_cb15273_c8/f4p1/761     |
| R01_cb10314_c8/flp0/729     | NA                         | R01_cb10314_c8/flp0/729     | NA                          | NA                          |
| R01_cb8564_c113764/flp0/247 | NA                         | R01_cb8564_c113764/flp0/247 | R01_cb8564_c113764/flp0/247 | R01_cb8564_c113764/flp0/247 |
| 8                           | NA                         | 8                           | 8                           | 8                           |
| R01_cb2356_c17/flp0/4027    | NA                         | R01_cb2356_c17/flp0/4027    | NA                          | NA                          |
| R01_cb12714_c39/flp0/1127   | NA                         | NA                          | NA                          | R01_cb12714_c39/flp0/1127   |
| R01_cb10873_c8/flp0/1354    | NA                         | NA                          | NA                          | R01_cb10873_c8/flp0/1354    |
| R01_cb4891_c2/flp0/3805     | NA                         | R01_cb4891_c2/flp0/3805     | NA                          | NA                          |
| R01_cb8564_c130354/flp0/220 | NA                         | NA                          | NA                          | R01_cb8564_c130354/flp0/220 |
| 9                           | NA                         | NA                          | NA                          | 9                           |
| R01_cb363_c1/flp0/2190      | NA                         | NA                          | NA                          | R01_cb363_c1/flp0/2190      |

|                              |                            |                              |                              |                              |
|------------------------------|----------------------------|------------------------------|------------------------------|------------------------------|
| R01_cb8564_c17119/f1p2/2558  | NA                         | NA                           | NA                           | R01_cb8564_c17119/f1p2/2558  |
| R01_cb15168_c0/f1p0/1401     | NA                         | NA                           | NA                           | R01_cb15168_c0/f1p0/1401     |
| R01_cb15458_c0/f4p0/1554     | NA                         | NA                           | NA                           | R01_cb15458_c0/f4p0/1554     |
| R01_cb18625_c1/f1p0/1464     | NA                         | NA                           | NA                           | R01_cb18625_c1/f1p0/1464     |
| R01_cb7342_c0/f1p0/2642      | NA                         | NA                           | NA                           | R01_cb7342_c0/f1p0/2642      |
| R01_cb8564_c110356/f1p0/2169 | NA                         | NA                           | NA                           | R01_cb8564_c110356/f1p0/2169 |
| R01_cb9154_c2/f2p0/1956      | NA                         | NA                           | NA                           | R01_cb9154_c2/f2p0/1956      |
| R01_cb16494_c2/f1p0/1472     | NA                         | NA                           | NA                           | R01_cb16494_c2/f1p0/1472     |
| R01_cb8564_c123241/f1p0/2130 | NA                         | R01_cb8564_c123241/f1p0/2130 | NA                           | NA                           |
| R01_cb17565_c4/f1p0/1497     | NA                         | R01_cb17565_c4/f1p0/1497     | NA                           | NA                           |
| R01_cb18456_c1595/f1p0/981   | NA                         | R01_cb18456_c1595/f1p0/981   | NA                           | NA                           |
| R01_cb2875_c9/f1p0/2927      | NA                         | NA                           | NA                           | R01_cb2875_c9/f1p0/2927      |
| R01_cb10902_c3/f1p0/1427     | NA                         | NA                           | NA                           | R01_cb10902_c3/f1p0/1427     |
| R01_cb1788_c6/f1p0/3148      | NA                         | NA                           | NA                           | R01_cb1788_c6/f1p0/3148      |
| R01_cb8564_c112878/f1p0/2103 | NA                         | R01_cb8564_c112878/f1p0/2103 | R01_cb8564_c112878/f1p0/2103 | R01_cb8564_c112878/f1p0/2103 |
| R01_cb18456_c7340/f1p0/362   | R01_cb18456_c7340/f1p0/362 | R01_cb18456_c7340/f1p0/362   | R01_cb18456_c7340/f1p0/362   | NA                           |
| R01_cb7506_c5/f1p0/3143      | NA                         | NA                           | NA                           | R01_cb7506_c5/f1p0/3143      |
| R01_cb14067_c0/f2p0/1645     | NA                         | NA                           | R01_cb14067_c0/f2p0/1645     | R01_cb14067_c0/f2p0/1645     |
| R01_cb15630_c6/f1p0/813      | NA                         | R01_cb15630_c6/f1p0/813      | R01_cb15630_c6/f1p0/813      | R01_cb15630_c6/f1p0/813      |
| R01_cb13910_c21/f1p0/1088    | NA                         | R01_cb13910_c21/f1p0/1088    | R01_cb13910_c21/f1p0/1088    | R01_cb13910_c21/f1p0/1088    |
| R01_cb2540_c1/f1p0/3881      | NA                         | R01_cb2540_c1/f1p0/3881      | NA                           | NA                           |
| R01_cb13760_c3/f1p1/1820     | NA                         | NA                           | NA                           | R01_cb13760_c3/f1p1/1820     |
| R01_cb11668_c0/f1p0/893      | NA                         | R01_cb11668_c0/f1p0/893      | R01_cb11668_c0/f1p0/893      | R01_cb11668_c0/f1p0/893      |

|                             |                          |                             |                          |                             |
|-----------------------------|--------------------------|-----------------------------|--------------------------|-----------------------------|
| R01_cb10845_c3/flp0/3316    | NA                       | R01_cb10845_c3/flp0/3316    | NA                       | NA                          |
| R01_cb8064_c6/flp1/854      | NA                       | R01_cb8064_c6/flp1/854      | NA                       | R01_cb8064_c6/flp1/854      |
| R01_cb2875_c7/flp0/3684     | NA                       | NA                          | NA                       | R01_cb2875_c7/flp0/3684     |
| R01_cb3825_c0/flp0/3481     | NA                       | R01_cb3825_c0/flp0/3481     | NA                       | NA                          |
| R01_cb1438_c10/flp5/4153    | NA                       | NA                          | NA                       | R01_cb1438_c10/flp5/4153    |
| R01_cb9812_c1/flp0/1966     | NA                       | NA                          | NA                       | R01_cb9812_c1/flp0/1966     |
| R01_cb14481_c3/flp0/716     | NA                       | NA                          | NA                       | R01_cb14481_c3/flp0/716     |
| R01_cb1400_c3/flp0/1927     | NA                       | R01_cb1400_c3/flp0/1927     | NA                       | R01_cb1400_c3/flp0/1927     |
| R01_cb8564_c87548/flp1/2389 | NA                       | NA                          | NA                       | R01_cb8564_c87548/flp1/2389 |
| R01_cb13118_c4/flp0/2138    | NA                       | R01_cb13118_c4/flp0/2138    | NA                       | NA                          |
| R01_cb8564_c16185/flp0/3213 | NA                       | R01_cb8564_c16185/flp0/3213 | NA                       | NA                          |
| R01_cb10723_c2/flp0/2730    | NA                       | NA                          | NA                       | R01_cb10723_c2/flp0/2730    |
| R01_cb16718_c1/flp0/418     | R01_cb16718_c1/flp0/418  | R01_cb16718_c1/flp0/418     | R01_cb16718_c1/flp0/418  | R01_cb16718_c1/flp0/418     |
| R01_cb17853_c2/flp0/927     | NA                       | NA                          | R01_cb17853_c2/flp0/927  | R01_cb17853_c2/flp0/927     |
| R01_cb12360_c0/f34p1/793    | NA                       | R01_cb12360_c0/f34p1/793    | NA                       | NA                          |
| R01_cb12589_c2/flp0/875     | R01_cb12589_c2/flp0/875  | NA                          | NA                       | R01_cb12589_c2/flp0/875     |
| R01_cb1489_c2/flp0/3842     | NA                       | NA                          | R01_cb1489_c2/flp0/3842  | NA                          |
| R01_cb15122_c3/flp0/5153    | NA                       | R01_cb15122_c3/flp0/5153    | NA                       | NA                          |
| R01_cb723_c3/flp0/2802      | NA                       | R01_cb723_c3/flp0/2802      | NA                       | NA                          |
| R01_cb2061_c11/flp1/1755    | NA                       | R01_cb2061_c11/flp1/1755    | NA                       | NA                          |
| R01_cb6655_c3/flp0/967      | NA                       | R01_cb6655_c3/flp0/967      | R01_cb6655_c3/flp0/967   | NA                          |
| R01_cb15914_c1/flp0/1589    | R01_cb15914_c1/flp0/1589 | R01_cb15914_c1/flp0/1589    | NA                       | R01_cb15914_c1/flp0/1589    |
| R01_cb10843_c5/flp0/2434    | R01_cb10843_c5/flp0/2434 | R01_cb10843_c5/flp0/2434    | R01_cb10843_c5/flp0/2434 | R01_cb10843_c5/flp0/2434    |
| R01_cb10171_c10/flp0/1023   | NA                       | NA                          | NA                       | R01_cb10171_c10/flp0/1023   |
| R01_cb8564_c2563/flp0/3329  | NA                       | R01_cb8564_c2563/flp0/3329  | NA                       | NA                          |
| R01_cb16496_c1/f2p0/1004    | NA                       | R01_cb16496_c1/f2p0/1004    | NA                       | NA                          |

|                              |                            |                              |                              |                              |
|------------------------------|----------------------------|------------------------------|------------------------------|------------------------------|
| R01_cb8564_c51864/flp0/2808  | NA                         | R01_cb8564_c51864/flp0/2808  | R01_cb8564_c51864/flp0/2808  | R01_cb8564_c51864/flp0/2808  |
| R01_cb2676_c3/f2p0/2662      | NA                         | NA                           | NA                           | R01_cb2676_c3/f2p0/2662      |
| R01_cb2991_c3/f2p0/2395      | NA                         | NA                           | NA                           | R01_cb2991_c3/f2p0/2395      |
| R01_cb5471_c17/flp0/2727     | NA                         | NA                           | NA                           | R01_cb5471_c17/flp0/2727     |
| R01_cb13755_c0/f2p0/1588     | NA                         | R01_cb13755_c0/f2p0/1588     | NA                           | NA                           |
| R01_cb8926_c1/flp0/2241      | R01_cb8926_c1/flp0/2241    | R01_cb8926_c1/flp0/2241      | NA                           | R01_cb8926_c1/flp0/2241      |
| R01_cb3192_c6/flp0/3794      | NA                         | NA                           | NA                           | R01_cb3192_c6/flp0/3794      |
| R01_cb18301_c17/flp0/1763    | R01_cb18301_c17/flp0/1763  | R01_cb18301_c17/flp0/1763    | R01_cb18301_c17/flp0/1763    | R01_cb18301_c17/flp0/1763    |
| R01_cb3712_c5/flp1/2972      | NA                         | R01_cb3712_c5/flp1/2972      | NA                           | NA                           |
| R01_cb18456_c7626/flp0/757   | R01_cb18456_c7626/flp0/757 | R01_cb18456_c7626/flp0/757   | R01_cb18456_c7626/flp0/757   | R01_cb18456_c7626/flp0/757   |
| R01_cb8564_c151660/flp0/2823 | NA                         | R01_cb8564_c151660/flp0/2823 | R01_cb8564_c151660/flp0/2823 | R01_cb8564_c151660/flp0/2823 |
| R01_cb8564_c51708/flp0/2518  | NA                         | R01_cb8564_c51708/flp0/2518  | R01_cb8564_c51708/flp0/2518  | R01_cb8564_c51708/flp0/2518  |
| R01_cb8564_c81280/flp0/2846  | NA                         | NA                           | R01_cb8564_c81280/flp0/2846  | R01_cb8564_c81280/flp0/2846  |
| R01_cb9759_c2/flp0/1980      | NA                         | NA                           | NA                           | R01_cb9759_c2/flp0/1980      |
| R01_cb6181_c38/flp0/2047     | NA                         | R01_cb6181_c38/flp0/2047     | NA                           | NA                           |
| R01_cb10272_c17/flp1/1759    | NA                         | NA                           | R01_cb10272_c17/flp1/1759    | R01_cb10272_c17/flp1/1759    |
| R01_cb10800_c2/flp0/2620     | NA                         | NA                           | NA                           | R01_cb10800_c2/flp0/2620     |
| R01_cb7962_c8/flp0/2272      | NA                         | R01_cb7962_c8/flp0/2272      | R01_cb7962_c8/flp0/2272      | R01_cb7962_c8/flp0/2272      |
| R01_cb3485_c20/flp0/1001     | NA                         | R01_cb3485_c20/flp0/1001     | R01_cb3485_c20/flp0/1001     | R01_cb3485_c20/flp0/1001     |
| R01_cb18345_c3/flp0/799      | R01_cb18345_c3/flp0/799    | R01_cb18345_c3/flp0/799      | R01_cb18345_c3/flp0/799      | R01_cb18345_c3/flp0/799      |
| R01_cb2773_c14/flp0/2413     | R01_cb2773_c14/flp0/2413   | R01_cb2773_c14/flp0/2413     | R01_cb2773_c14/flp0/2413     | NA                           |
| R01_cb8564_c3273/flp0/4325   | NA                         | R01_cb8564_c3273/flp0/4325   | NA                           | NA                           |
| R01_cb8564_c37557/flp1/3253  | NA                         | R01_cb8564_c37557/flp1/3253  | NA                           | NA                           |
| R01_cb8564_c89816/flp0/2675  | NA                         | R01_cb8564_c89816/flp0/2675  | NA                           | NA                           |
| R01_cb737_c68/flp0/2519      | NA                         | R01_cb737_c68/flp0/2519      | NA                           | NA                           |

|                             |                             |                             |                             |                             |
|-----------------------------|-----------------------------|-----------------------------|-----------------------------|-----------------------------|
| R01_cb2782_c0/flp0/3809     | R01_cb2782_c0/flp0/3809     | R01_cb2782_c0/flp0/3809     | R01_cb2782_c0/flp0/3809     | R01_cb2782_c0/flp0/3809     |
| R01_cb454_c11/flp0/2332     | NA                          | NA                          | NA                          | R01_cb454_c11/flp0/2332     |
| R01_cb6065_c23/flp0/1296    | NA                          | NA                          | NA                          | R01_cb6065_c23/flp0/1296    |
| R01_cb16621_c1/flp0/926     | NA                          | R01_cb16621_c1/flp0/926     | NA                          | NA                          |
| R01_cb17756_c9/flp0/378     | R01_cb17756_c9/flp0/378     | R01_cb17756_c9/flp0/378     | R01_cb17756_c9/flp0/378     | R01_cb17756_c9/flp0/378     |
| R01_cb5640_c4/flp0/2159     | NA                          | NA                          | NA                          | R01_cb5640_c4/flp0/2159     |
| R01_cb7367_c8/flp0/1802     | NA                          | NA                          | NA                          | R01_cb7367_c8/flp0/1802     |
| R01_cb13137_c6/flp0/1138    | NA                          | R01_cb13137_c6/flp0/1138    | NA                          | NA                          |
| R01_cb8901_c0/flp0/2237     | NA                          | R01_cb8901_c0/flp0/2237     | NA                          | R01_cb8901_c0/flp0/2237     |
| R01_cb8564_c82603/flp0/3186 | NA                          | R01_cb8564_c82603/flp0/3186 | NA                          | NA                          |
| R01_cb12762_c4/flp0/865     | NA                          | NA                          | NA                          | R01_cb12762_c4/flp0/865     |
| R01_cb18443_c0/flp0/428     | R01_cb18443_c0/flp0/428     | R01_cb18443_c0/flp0/428     | R01_cb18443_c0/flp0/428     | R01_cb18443_c0/flp0/428     |
| R01_cb580_c1/flp0/4871      | NA                          | NA                          | R01_cb580_c1/flp0/4871      | NA                          |
| R01_cb17973_c20/flp0/638    | R01_cb17973_c20/flp0/638    | R01_cb17973_c20/flp0/638    | R01_cb17973_c20/flp0/638    | R01_cb17973_c20/flp0/638    |
| R01_cb2571_c35/flp0/3622    | NA                          | NA                          | NA                          | R01_cb2571_c35/flp0/3622    |
| R01_cb10038_c4/flp0/1141    | NA                          | NA                          | NA                          | R01_cb10038_c4/flp0/1141    |
| R01_cb18456_c2503/flp0/1724 | NA                          | R01_cb18456_c2503/flp0/1724 | NA                          | R01_cb18456_c2503/flp0/1724 |
| R01_cb18456_c6984/flp1/1282 | NA                          | R01_cb18456_c6984/flp1/1282 | R01_cb18456_c6984/flp1/1282 | R01_cb18456_c6984/flp1/1282 |
| R01_cb2072_c32/flp0/3210    | NA                          | NA                          | NA                          | R01_cb2072_c32/flp0/3210    |
| R01_cb167_c43/flp0/3922     | NA                          | R01_cb167_c43/flp0/3922     | NA                          | NA                          |
| R01_cb5682_c8/flp0/1039     | R01_cb5682_c8/flp0/1039     | R01_cb5682_c8/flp0/1039     | NA                          | NA                          |
| R01_cb15504_c0/flp0/1239    | NA                          | R01_cb15504_c0/flp0/1239    | NA                          | NA                          |
| R01_cb18456_c6790/flp0/1522 | R01_cb18456_c6790/flp0/1522 | R01_cb18456_c6790/flp0/1522 | R01_cb18456_c6790/flp0/1522 | R01_cb18456_c6790/flp0/1522 |
| R01_cb8564_c86200/flp0/2056 | R01_cb8564_c86200/flp0/2056 | R01_cb8564_c86200/flp0/2056 | R01_cb8564_c86200/flp0/2056 | R01_cb8564_c86200/flp0/2056 |



|                             |                             |                             |                             |                             |
|-----------------------------|-----------------------------|-----------------------------|-----------------------------|-----------------------------|
| R01_cb14915_c2/f3p1/1551    | NA                          | NA                          | NA                          | R01_cb14915_c2/f3p1/1551    |
| R01_cb11212_c6/flp0/682     | NA                          | R01_cb11212_c6/flp0/682     | NA                          | NA                          |
| R01_cb18456_c581/flp0/502   | R01_cb18456_c581/flp0/502   | R01_cb18456_c581/flp0/502   | NA                          | R01_cb18456_c581/flp0/502   |
| R01_cb5287_c6/flp0/2126     | NA                          | R01_cb5287_c6/flp0/2126     | NA                          | NA                          |
| R01_cb5533_c135/flp0/3043   | NA                          | NA                          | NA                          | R01_cb5533_c135/flp0/3043   |
| R01_cb11895_c1/f2p0/1485    | NA                          | NA                          | NA                          | R01_cb11895_c1/f2p0/1485    |
| R01_cb13199_c0/flp0/1627    | NA                          | NA                          | NA                          | R01_cb13199_c0/flp0/1627    |
| R01_cb15540_c5/flp1/1492    | NA                          | NA                          | NA                          | R01_cb15540_c5/flp1/1492    |
| R01_cb6280_c1/flp0/2690     | NA                          | R01_cb6280_c1/flp0/2690     | NA                          | NA                          |
| R01_cb8820_c4/flp0/3519     | NA                          | R01_cb8820_c4/flp0/3519     | NA                          | NA                          |
| R01_cb1302_c2/flp0/2351     | NA                          | R01_cb1302_c2/flp0/2351     | R01_cb1302_c2/flp0/2351     | R01_cb1302_c2/flp0/2351     |
| R01_cb5042_c3/flp0/3257     | NA                          | NA                          | R01_cb5042_c3/flp0/3257     | R01_cb5042_c3/flp0/3257     |
| R01_cb8564_c15881/flp0/3538 | R01_cb8564_c15881/flp0/3538 | R01_cb8564_c15881/flp0/3538 | R01_cb8564_c15881/flp0/3538 | R01_cb8564_c15881/flp0/3538 |
| R01_cb11532_c0/flp0/925     | NA                          | R01_cb11532_c0/flp0/925     | NA                          | NA                          |
| R01_cb5502_c2/f2p0/1290     | NA                          | NA                          | NA                          | R01_cb5502_c2/f2p0/1290     |
| R01_cb16016_c3/flp0/950     | NA                          | NA                          | NA                          | R01_cb16016_c3/flp0/950     |
| R01_cb2378_c20/flp0/3349    | NA                          | NA                          | NA                          | R01_cb2378_c20/flp0/3349    |
| R01_cb14573_c29/flp0/1625   | R01_cb14573_c29/flp0/1625   | R01_cb14573_c29/flp0/1625   | R01_cb14573_c29/flp0/1625   | R01_cb14573_c29/flp0/1625   |
| R01_cb14950_c2/flp1/1014    | NA                          | R01_cb14950_c2/flp1/1014    | NA                          | NA                          |
| R01_cb8564_c47327/flp0/4584 | NA                          | R01_cb8564_c47327/flp0/4584 | NA                          | NA                          |
| R01_cb8564_c91176/flp0/2480 | NA                          | R01_cb8564_c91176/flp0/2480 | NA                          | NA                          |
| R01_cb17721_c0/flp0/891     | NA                          | R01_cb17721_c0/flp0/891     | R01_cb17721_c0/flp0/891     | R01_cb17721_c0/flp0/891     |
| R01_cb12821_c1/f2p1/653     | NA                          | R01_cb12821_c1/f2p1/653     | NA                          | NA                          |
| R01_cb15550_c0/flp0/749     | NA                          | NA                          | NA                          | R01_cb15550_c0/flp0/749     |
| R01_cb18456_c4989/flp0/746  | R01_cb18456_c4989/flp0/746  | R01_cb18456_c4989/flp0/746  | R01_cb18456_c4989/flp0/746  | R01_cb18456_c4989/flp0/746  |

|                             |                         |                             |                             |                             |
|-----------------------------|-------------------------|-----------------------------|-----------------------------|-----------------------------|
| R01_cb1846_c33/flp0/3166    | NA                      | R01_cb1846_c33/flp0/3166    | R01_cb1846_c33/flp0/3166    | R01_cb1846_c33/flp0/3166    |
| R01_cb14286_c3/flp0/1465    | NA                      | R01_cb14286_c3/flp0/1465    | NA                          | R01_cb14286_c3/flp0/1465    |
| R01_cb16210_c0/f3p0/898     | NA                      | NA                          | NA                          | R01_cb16210_c0/f3p0/898     |
| R01_cb8564_c4938/flp0/3004  | NA                      | R01_cb8564_c4938/flp0/3004  | NA                          | NA                          |
| R01_cb119_c41/flp2/4991     | NA                      | NA                          | NA                          | R01_cb119_c41/flp2/4991     |
| R01_cb2451_c27/flp1/3408    | NA                      | NA                          | NA                          | R01_cb2451_c27/flp1/3408    |
| R01_cb18456_c7149/flp0/1356 | NA                      | R01_cb18456_c7149/flp0/1356 | R01_cb18456_c7149/flp0/1356 | R01_cb18456_c7149/flp0/1356 |
| R01_cb10194_c7/flp0/921     | NA                      | R01_cb10194_c7/flp0/921     | NA                          | R01_cb10194_c7/flp0/921     |
| R01_cb10504_c3/flp0/636     | NA                      | R01_cb10504_c3/flp0/636     | NA                          | R01_cb10504_c3/flp0/636     |
| R01_cb17878_c0/flp0/1682    | NA                      | NA                          | NA                          | R01_cb17878_c0/flp0/1682    |
| R01_cb8564_c89714/flp0/3858 | NA                      | R01_cb8564_c89714/flp0/3858 | NA                          | R01_cb8564_c89714/flp0/3858 |
| R01_cb5640_c1/flp0/3049     | NA                      | NA                          | NA                          | R01_cb5640_c1/flp0/3049     |
| R01_cb13010_c3/flp0/690     | NA                      | R01_cb13010_c3/flp0/690     | NA                          | NA                          |
| R01_cb15154_c4/flp0/547     | NA                      | NA                          | R01_cb15154_c4/flp0/547     | R01_cb15154_c4/flp0/547     |
| R01_cb18109_c0/flp0/693     | R01_cb18109_c0/flp0/693 | R01_cb18109_c0/flp0/693     | NA                          | NA                          |
| R01_cb8564_c78351/flp0/3803 | NA                      | R01_cb8564_c78351/flp0/3803 | NA                          | NA                          |
| R01_cb16459_c1/flp0/1167    | NA                      | R01_cb16459_c1/flp0/1167    | NA                          | NA                          |
| R01_cb6720_c4/flp0/1106     | R01_cb6720_c4/flp0/1106 | R01_cb6720_c4/flp0/1106     | R01_cb6720_c4/flp0/1106     | R01_cb6720_c4/flp0/1106     |
| R01_cb14464_c1/flp0/1204    | NA                      | NA                          | NA                          | R01_cb14464_c1/flp0/1204    |
| R01_cb150_c5/flp0/3955      | NA                      | R01_cb150_c5/flp0/3955      | NA                          | NA                          |
| R01_cb3388_c8/flp0/2986     | NA                      | NA                          | NA                          | R01_cb3388_c8/flp0/2986     |
| R01_cb12587_c12/flp0/1720   | NA                      | NA                          | NA                          | R01_cb12587_c12/flp0/1720   |
| R01_cb8564_c4113/f2p0/2913  | NA                      | R01_cb8564_c4113/f2p0/2913  | R01_cb8564_c4113/f2p0/2913  | R01_cb8564_c4113/f2p0/2913  |
| R01_cb13638_c1/f2p0/996     | NA                      | NA                          | NA                          | R01_cb13638_c1/f2p0/996     |
| R01_cb2760_c2/f2p0/2091     | R01_cb2760_c2/f2p0/2091 | R01_cb2760_c2/f2p0/2091     | NA                          | NA                          |
| R01_cb18456_c2321/flp0/608  | NA                      | R01_cb18456_c2321/flp0/608  | NA                          | R01_cb18456_c2321/flp0/608  |

|                              |                             |                              |                              |                              |
|------------------------------|-----------------------------|------------------------------|------------------------------|------------------------------|
| R01_cb18151_c1/flp0/899      | NA                          | R01_cb18151_c1/flp0/899      | NA                           | R01_cb18151_c1/flp0/899      |
| R01_cb8564_c22483/flp0/3181  | R01_cb8564_c22483/flp0/3181 | R01_cb8564_c22483/flp0/3181  | NA                           | NA                           |
| R01_cb8564_c16145/flp0/3085  | NA                          | R01_cb8564_c16145/flp0/3085  | NA                           | NA                           |
| R01_cb14573_c28/flp0/1717    | NA                          | R01_cb14573_c28/flp0/1717    | R01_cb14573_c28/flp0/1717    | R01_cb14573_c28/flp0/1717    |
| R01_cb17442_c1/flp0/1455     | NA                          | NA                           | NA                           | R01_cb17442_c1/flp0/1455     |
| R01_cb12012_c1/flp0/1507     | NA                          | NA                           | NA                           | R01_cb12012_c1/flp0/1507     |
| R01_cb2826_c20/flp0/5103     | NA                          | R01_cb2826_c20/flp0/5103     | NA                           | NA                           |
| R01_cb8564_c50680/flp0/2269  | NA                          | NA                           | NA                           | R01_cb8564_c50680/flp0/2269  |
| R01_cb6258_c12/flp0/2772     | NA                          | NA                           | NA                           | R01_cb6258_c12/flp0/2772     |
| R01_cb14639_c3/flp0/331      | R01_cb14639_c3/flp0/331     | R01_cb14639_c3/flp0/331      | R01_cb14639_c3/flp0/331      | R01_cb14639_c3/flp0/331      |
| R01_cb8564_c72276/flp0/3795  | NA                          | R01_cb8564_c72276/flp0/3795  | NA                           | NA                           |
| R01_cb11151_c1/flp0/2174     | NA                          | NA                           | NA                           | R01_cb11151_c1/flp0/2174     |
| R01_cb8564_c68769/f3p0/2103  | NA                          | NA                           | R01_cb8564_c68769/f3p0/2103  | R01_cb8564_c68769/f3p0/2103  |
| R01_cb8564_c19928/flp0/2100  | NA                          | NA                           | NA                           | R01_cb8564_c19928/flp0/2100  |
| R01_cb7049_c3/flp0/1587      | NA                          | R01_cb7049_c3/flp0/1587      | NA                           | NA                           |
| R01_cb5622_c7/flp0/1600      | NA                          | NA                           | NA                           | R01_cb5622_c7/flp0/1600      |
| R01_cb17861_c3/flp0/1420     | NA                          | NA                           | NA                           | R01_cb17861_c3/flp0/1420     |
| R01_cb2451_c33/flp1/3069     | NA                          | NA                           | NA                           | R01_cb2451_c33/flp1/3069     |
| R01_cb11301_c1/flp0/3700     | NA                          | R01_cb11301_c1/flp0/3700     | NA                           | NA                           |
| R01_cb570_c8/flp0/2010       | NA                          | R01_cb570_c8/flp0/2010       | NA                           | NA                           |
| R01_cb4529_c5/flp0/3304      | NA                          | R01_cb4529_c5/flp0/3304      | NA                           | NA                           |
| R01_cb8564_c117920/flp0/2237 | NA                          | R01_cb8564_c117920/flp0/2237 | R01_cb8564_c117920/flp0/2237 | R01_cb8564_c117920/flp0/2237 |
| R01_cb5900_c104/flp0/2791    | NA                          | R01_cb5900_c104/flp0/2791    | NA                           | NA                           |
| R01_cb8564_c126148/flp0/253  | R01_cb8564_c126148/flp0/253 | R01_cb8564_c126148/flp0/253  | R01_cb8564_c126148/flp0/253  | R01_cb8564_c126148/flp0/253  |

|                             |                         |                             |                             |                             |
|-----------------------------|-------------------------|-----------------------------|-----------------------------|-----------------------------|
| 5                           | 35                      | 5                           | 5                           | 5                           |
| R01_cb712_c12/f1p0/4255     | NA                      | NA                          | NA                          | R01_cb712_c12/f1p0/4255     |
| R01_cb13386_c19/f1p0/1632   | NA                      | R01_cb13386_c19/f1p0/1632   | NA                          | NA                          |
| R01_cb8320_c1/f1p1/2333     | NA                      | NA                          | NA                          | R01_cb8320_c1/f1p1/2333     |
| R01_cb15116_c4/f1p0/1062    | NA                      | NA                          | NA                          | R01_cb15116_c4/f1p0/1062    |
| R01_cb10579_c2/f1p0/3685    | NA                      | R01_cb10579_c2/f1p0/3685    | NA                          | R01_cb10579_c2/f1p0/3685    |
| R01_cb8564_c16521/f3p0/4088 | NA                      | NA                          | NA                          | R01_cb8564_c16521/f3p0/4088 |
| R01_cb9319_c6/f1p1/1841     | NA                      | R01_cb9319_c6/f1p1/1841     | NA                          | R01_cb9319_c6/f1p1/1841     |
| R01_cb6319_c17/f1p0/2488    | NA                      | R01_cb6319_c17/f1p0/2488    | NA                          | NA                          |
| R01_cb14125_c166/f238p0/682 | NA                      | R01_cb14125_c166/f238p0/682 | R01_cb14125_c166/f238p0/682 | NA                          |
| R01_cb10752_c1/f2p0/1733    | NA                      | R01_cb10752_c1/f2p0/1733    | NA                          | NA                          |
| R01_cb3359_c22/f1p0/2040    | NA                      | R01_cb3359_c22/f1p0/2040    | NA                          | NA                          |
| R01_cb5698_c4/f1p0/2436     | R01_cb5698_c4/f1p0/2436 | R01_cb5698_c4/f1p0/2436     | NA                          | R01_cb5698_c4/f1p0/2436     |
| R01_cb8564_c39806/f1p0/2923 | NA                      | NA                          | NA                          | R01_cb8564_c39806/f1p0/2923 |
| R01_cb17183_c8/f5p3/776     | NA                      | NA                          | NA                          | R01_cb17183_c8/f5p3/776     |
| R01_cb13875_c4/f1p1/1694    | NA                      | NA                          | NA                          | R01_cb13875_c4/f1p1/1694    |
| R01_cb7653_c8/f1p0/3624     | NA                      | R01_cb7653_c8/f1p0/3624     | NA                          | R01_cb7653_c8/f1p0/3624     |
| R01_cb11208_c2/f1p0/3597    | NA                      | NA                          | NA                          | R01_cb11208_c2/f1p0/3597    |
| R01_cb51_c24/f1p0/2880      | NA                      | R01_cb51_c24/f1p0/2880      | NA                          | NA                          |
| R01_cb5208_c10/f1p1/2768    | NA                      | NA                          | NA                          | R01_cb5208_c10/f1p1/2768    |
| R01_cb1119_c9/f1p0/2704     | NA                      | R01_cb1119_c9/f1p0/2704     | NA                          | NA                          |
| R01_cb1788_c3/f1p0/3440     | NA                      | NA                          | NA                          | R01_cb1788_c3/f1p0/3440     |
| R01_cb12739_c8/f1p0/420     | R01_cb12739_c8/f1p0/420 | R01_cb12739_c8/f1p0/420     | NA                          | R01_cb12739_c8/f1p0/420     |
| R01_cb18456_c4794/f1p0/598  | NA                      | NA                          | NA                          | R01_cb18456_c4794/f1p0/598  |
| R01_cb7019_c1/f1p0/1981     | NA                      | R01_cb7019_c1/f1p0/1981     | R01_cb7019_c1/f1p0/1981     | R01_cb7019_c1/f1p0/1981     |
| R01_cb11358_c0/f1p0/619     | NA                      | R01_cb11358_c0/f1p0/619     | R01_cb11358_c0/f1p0/619     | R01_cb11358_c0/f1p0/619     |

|                              |                             |                             |                          |                              |
|------------------------------|-----------------------------|-----------------------------|--------------------------|------------------------------|
| R01_cb18456_c6123/flp0/637   | NA                          | NA                          | NA                       | R01_cb18456_c6123/flp0/637   |
| R01_cb8564_c43748/flp0/3190  | R01_cb8564_c43748/flp0/3190 | R01_cb8564_c43748/flp0/3190 | NA                       | NA                           |
| R01_cb3307_c12/flp0/2912     | NA                          | R01_cb3307_c12/flp0/2912    | NA                       | NA                           |
| R01_cb3960_c0/flp0/3436      | NA                          | R01_cb3960_c0/flp0/3436     | R01_cb3960_c0/flp0/3436  | R01_cb3960_c0/flp0/3436      |
| R01_cb4178_c5/flp0/2452      | NA                          | NA                          | NA                       | R01_cb4178_c5/flp0/2452      |
| R01_cb17266_c29/flp0/564     | NA                          | R01_cb17266_c29/flp0/564    | R01_cb17266_c29/flp0/564 | R01_cb17266_c29/flp0/564     |
| R01_cb8564_c113857/flp0/3048 | NA                          | NA                          | NA                       | R01_cb8564_c113857/flp0/3048 |
| R01_cb15931_c1/flp0/977      | NA                          | R01_cb15931_c1/flp0/977     | NA                       | R01_cb15931_c1/flp0/977      |
| R01_cb12360_c6/flp0/539      | NA                          | R01_cb12360_c6/flp0/539     | NA                       | R01_cb12360_c6/flp0/539      |
| R01_cb8028_c3/flp0/4063      | NA                          | R01_cb8028_c3/flp0/4063     | NA                       | R01_cb8028_c3/flp0/4063      |
| R01_cb11547_c2/flp0/3211     | R01_cb11547_c2/flp0/3211    | R01_cb11547_c2/flp0/3211    | R01_cb11547_c2/flp0/3211 | R01_cb11547_c2/flp0/3211     |
| R01_cb10776_c1/flp0/2288     | NA                          | R01_cb10776_c1/flp0/2288    | NA                       | NA                           |
| R01_cb12221_c0/flp0/554      | R01_cb12221_c0/flp0/554     | R01_cb12221_c0/flp0/554     | R01_cb12221_c0/flp0/554  | NA                           |
| R01_cb3051_c10/flp0/2431     | NA                          | R01_cb3051_c10/flp0/2431    | NA                       | R01_cb3051_c10/flp0/2431     |
| R01_cb10080_c4/flp0/910      | NA                          | R01_cb10080_c4/flp0/910     | NA                       | NA                           |
| R01_cb943_c8/flp0/5094       | NA                          | NA                          | NA                       | R01_cb943_c8/flp0/5094       |
| R01_cb11248_c4/flp0/949      | NA                          | R01_cb11248_c4/flp0/949     | NA                       | NA                           |
| R01_cb9847_c17/flp0/682      | NA                          | R01_cb9847_c17/flp0/682     | R01_cb9847_c17/flp0/682  | NA                           |
| R01_cb2812_c4/f2p0/3146      | NA                          | NA                          | NA                       | R01_cb2812_c4/f2p0/3146      |
| R01_cb12421_c61/flp0/653     | R01_cb12421_c61/flp0/653    | R01_cb12421_c61/flp0/653    | NA                       | NA                           |
| R01_cb6453_c4/flp0/2772      | NA                          | R01_cb6453_c4/flp0/2772     | NA                       | NA                           |
| R01_cb11649_c1/flp0/2149     | R01_cb11649_c1/flp0/2149    | R01_cb11649_c1/flp0/2149    | NA                       | NA                           |
| R01_cb13044_c0/f3p0/486      | NA                          | R01_cb13044_c0/f3p0/486     | NA                       | NA                           |
| R01_cb6297_c19/flp0/815      | NA                          | NA                          | R01_cb6297_c19/flp0/815  | NA                           |

|                                  |                                   |                                  |                                  |                                  |
|----------------------------------|-----------------------------------|----------------------------------|----------------------------------|----------------------------------|
| R01_cb17582_c3/flp0/588          | NA                                | R01_cb17582_c3/flp0/588          | R01_cb17582_c3/flp0/588          | R01_cb17582_c3/flp0/588          |
| R01_cb8564_c9513/f4p0/2171       | R01_cb8564_c9513/f4p0/2171        | R01_cb8564_c9513/f4p0/2171       | R01_cb8564_c9513/f4p0/2171       | R01_cb8564_c9513/f4p0/2171       |
| R01_cb8564_c38151/flp3/3560      | NA                                | NA                               | NA                               | R01_cb8564_c38151/flp3/3560      |
| R01_cb7646_c8/flp0/1127          | NA                                | NA                               | NA                               | R01_cb7646_c8/flp0/1127          |
| R01_cb7302_c4/flp0/955           | NA                                | NA                               | NA                               | R01_cb7302_c4/flp0/955           |
| R01_cb3303_c3/flp0/1224          | R01_cb3303_c3/flp0/1224           | R01_cb3303_c3/flp0/1224          | R01_cb3303_c3/flp0/1224          | R01_cb3303_c3/flp0/1224          |
| R01_cb8564_c124637/flp0/234<br>3 | NA                                | R01_cb8564_c124637/flp0/234<br>3 | NA                               | R01_cb8564_c124637/flp0/234<br>3 |
| R01_cb1915_c24/flp0/3278         | NA                                | R01_cb1915_c24/flp0/3278         | NA                               | NA                               |
| R01_cb8564_c79449/flp0/2980      | NA                                | NA                               | NA                               | R01_cb8564_c79449/flp0/2980      |
| R01_cb8564_c16879/flp0/3722      | NA                                | NA                               | NA                               | R01_cb8564_c16879/flp0/3722      |
| R01_cb12581_c4/flp0/1017         | NA                                | R01_cb12581_c4/flp0/1017         | NA                               | NA                               |
| R01_cb11491_c2/flp0/646          | R01_cb11491_c2/flp0/646           | R01_cb11491_c2/flp0/646          | R01_cb11491_c2/flp0/646          | R01_cb11491_c2/flp0/646          |
| R01_cb18120_c1/flp0/853          | NA                                | R01_cb18120_c1/flp0/853          | NA                               | R01_cb18120_c1/flp0/853          |
| R01_cb10029_c204/f2p0/979        | NA                                | R01_cb10029_c204/f2p0/979        | NA                               | NA                               |
| R01_cb8564_c119495/flp0/198<br>7 | R01_cb8564_c119495/flp0/198<br>87 | R01_cb8564_c119495/flp0/198<br>7 | R01_cb8564_c119495/flp0/198<br>7 | R01_cb8564_c119495/flp0/198<br>7 |
| R01_cb1706_c6/flp0/2895          | NA                                | NA                               | NA                               | R01_cb1706_c6/flp0/2895          |
| R01_cb8564_c3953/flp0/2871       | NA                                | R01_cb8564_c3953/flp0/2871       | R01_cb8564_c3953/flp0/2871       | R01_cb8564_c3953/flp0/2871       |
| R01_cb8564_c69282/f2p0/2953      | NA                                | R01_cb8564_c69282/f2p0/2953      | R01_cb8564_c69282/f2p0/2953      | NA                               |
| R01_cb17939_c1/flp0/418          | NA                                | R01_cb17939_c1/flp0/418          | NA                               | R01_cb17939_c1/flp0/418          |
| R01_cb16075_c3/flp0/1422         | NA                                | R01_cb16075_c3/flp0/1422         | NA                               | NA                               |
| R01_cb8564_c2031/flp0/2606       | NA                                | R01_cb8564_c2031/flp0/2606       | R01_cb8564_c2031/flp0/2606       | NA                               |
| R01_cb11329_c1/flp0/1946         | R01_cb11329_c1/flp0/1946          | R01_cb11329_c1/flp0/1946         | NA                               | R01_cb11329_c1/flp0/1946         |
| R01_cb2543_c45/flp0/2956         | NA                                | R01_cb2543_c45/flp0/2956         | R01_cb2543_c45/flp0/2956         | NA                               |
| R01_cb8564_c17864/flp3/3853      | NA                                | NA                               | NA                               | R01_cb8564_c17864/flp3/3853      |

|                                  |                          |                             |                            |                                  |
|----------------------------------|--------------------------|-----------------------------|----------------------------|----------------------------------|
| R01_cb17132_c0/flp0/874          | NA                       | NA                          | R01_cb17132_c0/flp0/874    | NA                               |
| R01_cb7484_c9/flp0/658           | NA                       | R01_cb7484_c9/flp0/658      | NA                         | R01_cb7484_c9/flp0/658           |
| R01_cb9606_c89/flp0/1399         | NA                       | R01_cb9606_c89/flp0/1399    | NA                         | NA                               |
| R01_cb18456_c7498/flp0/609       | NA                       | R01_cb18456_c7498/flp0/609  | R01_cb18456_c7498/flp0/609 | NA                               |
| R01_cb10277_c4/flp0/658          | NA                       | R01_cb10277_c4/flp0/658     | NA                         | R01_cb10277_c4/flp0/658          |
| R01_cb3992_c4/flp0/1184          | R01_cb3992_c4/flp0/1184  | R01_cb3992_c4/flp0/1184     | R01_cb3992_c4/flp0/1184    | NA                               |
| R01_cb5659_c33/flp0/2120         | NA                       | NA                          | NA                         | R01_cb5659_c33/flp0/2120         |
| R01_cb8564_c185222/flp3/377<br>2 | NA                       | NA                          | NA                         | R01_cb8564_c185222/flp3/377<br>2 |
| R01_cb723_c0/flp0/4662           | NA                       | R01_cb723_c0/flp0/4662      | NA                         | NA                               |
| R01_cb11879_c4/flp0/1353         | NA                       | NA                          | NA                         | R01_cb11879_c4/flp0/1353         |
| R01_cb15460_c0/fl2p0/529         | NA                       | R01_cb15460_c0/fl2p0/529    | NA                         | R01_cb15460_c0/fl2p0/529         |
| R01_cb11106_c1/flp0/1973         | NA                       | NA                          | NA                         | R01_cb11106_c1/flp0/1973         |
| R01_cb3169_c1/flp0/3014          | NA                       | NA                          | NA                         | R01_cb3169_c1/flp0/3014          |
| R01_cb6867_c4/flp0/872           | NA                       | NA                          | NA                         | R01_cb6867_c4/flp0/872           |
| R01_cb3358_c7/flp0/2790          | R01_cb3358_c7/flp0/2790  | R01_cb3358_c7/flp0/2790     | R01_cb3358_c7/flp0/2790    | R01_cb3358_c7/flp0/2790          |
| R01_cb18409_c91/flp0/425         | R01_cb18409_c91/flp0/425 | R01_cb18409_c91/flp0/425    | R01_cb18409_c91/flp0/425   | R01_cb18409_c91/flp0/425         |
| R01_cb13428_c7/flp0/763          | NA                       | R01_cb13428_c7/flp0/763     | NA                         | NA                               |
| R01_cb16154_c0/flp0/1002         | NA                       | R01_cb16154_c0/flp0/1002    | NA                         | NA                               |
| R01_cb8564_c69217/f2p0/2619      | NA                       | NA                          | NA                         | R01_cb8564_c69217/f2p0/2619      |
| R01_cb10236_c2/flp0/2004         | NA                       | NA                          | NA                         | R01_cb10236_c2/flp0/2004         |
| R01_cb8564_c17422/flp1/4151      | NA                       | R01_cb8564_c17422/flp1/4151 | NA                         | R01_cb8564_c17422/flp1/4151      |
| R01_cb11547_c0/f2p0/649          | R01_cb11547_c0/f2p0/649  | R01_cb11547_c0/f2p0/649     | R01_cb11547_c0/f2p0/649    | R01_cb11547_c0/f2p0/649          |
| R01_cb2729_c8/flp0/1680          | NA                       | R01_cb2729_c8/flp0/1680     | NA                         | R01_cb2729_c8/flp0/1680          |
| R01_cb18409_c32/f2p0/371         | R01_cb18409_c32/f2p0/371 | R01_cb18409_c32/f2p0/371    | R01_cb18409_c32/f2p0/371   | R01_cb18409_c32/f2p0/371         |
| R01_cb4732_c3/flp0/6862          | NA                       | NA                          | NA                         | R01_cb4732_c3/flp0/6862          |

|                              |                              |                              |                              |                              |
|------------------------------|------------------------------|------------------------------|------------------------------|------------------------------|
| R01_cb15266_c2/flp0/608      | R01_cb15266_c2/flp0/608      | R01_cb15266_c2/flp0/608      | NA                           | NA                           |
| R01_cb7145_c1/flp0/2686      | NA                           | R01_cb7145_c1/flp0/2686      | NA                           | NA                           |
| R01_cb8107_c2/flp1/2465      | R01_cb8107_c2/flp1/2465      | R01_cb8107_c2/flp1/2465      | R01_cb8107_c2/flp1/2465      | R01_cb8107_c2/flp1/2465      |
| R01_cb8564_c19208/flp0/3464  | R01_cb8564_c19208/flp0/3464  | R01_cb8564_c19208/flp0/3464  | NA                           | R01_cb8564_c19208/flp0/3464  |
| R01_cb13421_c1/flp0/1230     | R01_cb13421_c1/flp0/1230     | R01_cb13421_c1/flp0/1230     | NA                           | R01_cb13421_c1/flp0/1230     |
| R01_cb8710_c7/flp0/3148      | NA                           | R01_cb8710_c7/flp0/3148      | NA                           | NA                           |
| R01_cb8564_c4092/flp0/3913   | NA                           | R01_cb8564_c4092/flp0/3913   | R01_cb8564_c4092/flp0/3913   | NA                           |
| R01_cb8564_c3172/flp0/2117   | NA                           | NA                           | NA                           | R01_cb8564_c3172/flp0/2117   |
| R01_cb18606_c0/flp0/488      | NA                           | R01_cb18606_c0/flp0/488      | NA                           | NA                           |
| R01_cb8564_c122477/flp0/2561 | NA                           | NA                           | NA                           | R01_cb8564_c122477/flp0/2561 |
| R01_cb1894_c4/flp0/3066      | NA                           | R01_cb1894_c4/flp0/3066      | R01_cb1894_c4/flp0/3066      | R01_cb1894_c4/flp0/3066      |
| R01_cb8803_c0/flp0/2266      | NA                           | R01_cb8803_c0/flp0/2266      | NA                           | NA                           |
| R01_cb8564_c126847/flp0/2680 | R01_cb8564_c126847/flp0/2680 | R01_cb8564_c126847/flp0/2680 | R01_cb8564_c126847/flp0/2680 | R01_cb8564_c126847/flp0/2680 |
| R01_cb7988_c0/flp1/2527      | NA                           | NA                           | NA                           | R01_cb7988_c0/flp1/2527      |
| R01_cb12779_c0/f2p0/1005     | R01_cb12779_c0/f2p0/1005     | R01_cb12779_c0/f2p0/1005     | R01_cb12779_c0/f2p0/1005     | R01_cb12779_c0/f2p0/1005     |
| R01_cb101_c6/flp0/2290       | NA                           | NA                           | NA                           | R01_cb101_c6/flp0/2290       |
| R01_cb12932_c0/flp0/779      | R01_cb12932_c0/flp0/779      | R01_cb12932_c0/flp0/779      | NA                           | NA                           |
| R01_cb7141_c2/flp0/2327      | NA                           | R01_cb7141_c2/flp0/2327      | NA                           | R01_cb7141_c2/flp0/2327      |
| R01_cb10192_c7/flp0/1456     | NA                           | NA                           | NA                           | R01_cb10192_c7/flp0/1456     |
| R01_cb8475_c1/flp0/2078      | NA                           | R01_cb8475_c1/flp0/2078      | NA                           | R01_cb8475_c1/flp0/2078      |
| R01_cb14463_c1/f2p0/936      | NA                           | NA                           | NA                           | R01_cb14463_c1/f2p0/936      |
| R01_cb124_c18/flp0/3758      | NA                           | NA                           | NA                           | R01_cb124_c18/flp0/3758      |
| R01_cb9606_c5/f2p1/1916      | NA                           | R01_cb9606_c5/f2p1/1916      | NA                           | NA                           |



|                             |                         |                             |    |                             |
|-----------------------------|-------------------------|-----------------------------|----|-----------------------------|
| R01_cb8564_c25256/f1p0/1962 | NA                      | NA                          | NA | R01_cb8564_c25256/f1p0/1962 |
| R01_cb6093_c5/f1p0/2717     | NA                      | R01_cb6093_c5/f1p0/2717     | NA | NA                          |
| R01_cb13279_c2/f1p0/1000    | NA                      | NA                          | NA | R01_cb13279_c2/f1p0/1000    |
| R01_cb8564_c1468/f1p0/4772  | NA                      | R01_cb8564_c1468/f1p0/4772  | NA | NA                          |
| R01_cb8400_c0/f6p1/1868     | NA                      | NA                          | NA | R01_cb8400_c0/f6p1/1868     |
| R01_cb11107_c7/f1p0/2124    | NA                      | R01_cb11107_c7/f1p0/2124    | NA | NA                          |
| R01_cb18456_c1686/f2p0/1403 | NA                      | R01_cb18456_c1686/f2p0/1403 | NA | NA                          |
| R01_cb9380_c10/f3p0/1968    | NA                      | NA                          | NA | R01_cb9380_c10/f3p0/1968    |
| R01_cb6586_c0/f1p0/2816     | NA                      | R01_cb6586_c0/f1p0/2816     | NA | NA                          |
| R01_cb13982_c2/f1p0/1393    | NA                      | NA                          | NA | R01_cb13982_c2/f1p0/1393    |
| R01_cb8564_c86688/f1p0/3136 | NA                      | R01_cb8564_c86688/f1p0/3136 | NA | NA                          |
| R01_cb6947_c8/f2p0/1909     | NA                      | NA                          | NA | R01_cb6947_c8/f2p0/1909     |
| R01_cb10797_c2/f1p0/742     | NA                      | R01_cb10797_c2/f1p0/742     | NA | R01_cb10797_c2/f1p0/742     |
| R01_cb693_c4/f1p0/3062      | NA                      | NA                          | NA | R01_cb693_c4/f1p0/3062      |
| R01_cb11290_c3/f1p0/3152    | NA                      | R01_cb11290_c3/f1p0/3152    | NA | R01_cb11290_c3/f1p0/3152    |
| R01_cb7497_c10/f1p1/3177    | NA                      | NA                          | NA | R01_cb7497_c10/f1p1/3177    |
| R01_cb6258_c16/f1p1/2765    | NA                      | NA                          | NA | R01_cb6258_c16/f1p1/2765    |
| R01_cb10936_c5/f1p0/1713    | NA                      | NA                          | NA | R01_cb10936_c5/f1p0/1713    |
| R01_cb6644_c1/f1p0/3304     | NA                      | R01_cb6644_c1/f1p0/3304     | NA | NA                          |
| R01_cb8564_c84126/f1p0/3186 | NA                      | R01_cb8564_c84126/f1p0/3186 | NA | NA                          |
| R01_cb17052_c7/f1p0/577     | NA                      | R01_cb17052_c7/f1p0/577     | NA | R01_cb17052_c7/f1p0/577     |
| R01_cb4134_c23/f1p0/2638    | NA                      | NA                          | NA | R01_cb4134_c23/f1p0/2638    |
| R01_cb3875_c8/f1p0/2382     | NA                      | R01_cb3875_c8/f1p0/2382     | NA | NA                          |
| R01_cb9359_c1/f1p0/2987     | NA                      | NA                          | NA | R01_cb9359_c1/f1p0/2987     |
| R01_cb3011_c34/f1p0/3348    | NA                      | R01_cb3011_c34/f1p0/3348    | NA | NA                          |
| R01_cb17357_c0/f3p0/362     | R01_cb17357_c0/f3p0/362 | R01_cb17357_c0/f3p0/362     | NA | NA                          |

|                             |                         |                             |                          |                             |
|-----------------------------|-------------------------|-----------------------------|--------------------------|-----------------------------|
| R01_cb7877_c1/flp0/2502     | NA                      | R01_cb7877_c1/flp0/2502     | R01_cb7877_c1/flp0/2502  | R01_cb7877_c1/flp0/2502     |
| R01_cb8564_c16296/flp4/4487 | NA                      | NA                          | NA                       | R01_cb8564_c16296/flp4/4487 |
| R01_cb101_c3/flp0/2284      | NA                      | NA                          | NA                       | R01_cb101_c3/flp0/2284      |
| R01_cb10651_c1/flp0/3689    | NA                      | R01_cb10651_c1/flp0/3689    | NA                       | NA                          |
| R01_cb12936_c1/flp0/501     | NA                      | R01_cb12936_c1/flp0/501     | NA                       | R01_cb12936_c1/flp0/501     |
| R01_cb8564_c31883/f5p1/2785 | NA                      | NA                          | NA                       | R01_cb8564_c31883/f5p1/2785 |
| R01_cb15449_c2/flp0/1034    | NA                      | R01_cb15449_c2/flp0/1034    | R01_cb15449_c2/flp0/1034 | R01_cb15449_c2/flp0/1034    |
| R01_cb17838_c3/flp0/495     | NA                      | R01_cb17838_c3/flp0/495     | R01_cb17838_c3/flp0/495  | R01_cb17838_c3/flp0/495     |
| R01_cb11469_c0/flp0/720     | NA                      | NA                          | NA                       | R01_cb11469_c0/flp0/720     |
| R01_cb14279_c0/f3p0/1689    | NA                      | NA                          | R01_cb14279_c0/f3p0/1689 | R01_cb14279_c0/f3p0/1689    |
| R01_cb9529_c6/flp0/793      | NA                      | NA                          | NA                       | R01_cb9529_c6/flp0/793      |
| R01_cb10935_c0/flp0/954     | NA                      | NA                          | R01_cb10935_c0/flp0/954  | R01_cb10935_c0/flp0/954     |
| R01_cb9941_c6/flp0/1628     | NA                      | R01_cb9941_c6/flp0/1628     | NA                       | R01_cb9941_c6/flp0/1628     |
| R01_cb17224_c0/f2p0/711     | R01_cb17224_c0/f2p0/711 | R01_cb17224_c0/f2p0/711     | NA                       | NA                          |
| R01_cb4128_c10/f3p1/2897    | NA                      | NA                          | NA                       | R01_cb4128_c10/f3p1/2897    |
| R01_cb8564_c81256/flp0/2508 | NA                      | R01_cb8564_c81256/flp0/2508 | NA                       | NA                          |
| R01_cb18656_c8/flp0/5500    | NA                      | NA                          | NA                       | R01_cb18656_c8/flp0/5500    |
| R01_cb17755_c1/flp0/678     | NA                      | NA                          | NA                       | R01_cb17755_c1/flp0/678     |
| R01_cb14758_c3/flp0/412     | NA                      | R01_cb14758_c3/flp0/412     | R01_cb14758_c3/flp0/412  | R01_cb14758_c3/flp0/412     |
| R01_cb16364_c1/flp0/886     | NA                      | R01_cb16364_c1/flp0/886     | NA                       | NA                          |
| R01_cb9606_c88/flp0/1478    | NA                      | R01_cb9606_c88/flp0/1478    | R01_cb9606_c88/flp0/1478 | R01_cb9606_c88/flp0/1478    |
| R01_cb4363_c5/flp0/1115     | NA                      | R01_cb4363_c5/flp0/1115     | NA                       | NA                          |
| R01_cb5114_c2/flp0/1487     | NA                      | R01_cb5114_c2/flp0/1487     | R01_cb5114_c2/flp0/1487  | R01_cb5114_c2/flp0/1487     |
| R01_cb1178_c20/flp0/1387    | NA                      | NA                          | NA                       | R01_cb1178_c20/flp0/1387    |
| R01_cb9129_c2/flp0/2669     | NA                      | R01_cb9129_c2/flp0/2669     | NA                       | R01_cb9129_c2/flp0/2669     |
| R01_cb6758_c4/flp1/2238     | NA                      | R01_cb6758_c4/flp1/2238     | NA                       | R01_cb6758_c4/flp1/2238     |

|                              |                          |                              |                              |                              |
|------------------------------|--------------------------|------------------------------|------------------------------|------------------------------|
| R01_cb8564_c78482/flp0/3189  | NA                       | R01_cb8564_c78482/flp0/3189  | NA                           | NA                           |
| R01_cb18456_c4722/flp0/486   | NA                       | NA                           | NA                           | R01_cb18456_c4722/flp0/486   |
| R01_cb18456_c7943/f5p0/503   | NA                       | R01_cb18456_c7943/f5p0/503   | R01_cb18456_c7943/f5p0/503   | R01_cb18456_c7943/f5p0/503   |
| R01_cb14480_c5/flp1/524      | R01_cb14480_c5/flp1/524  | R01_cb14480_c5/flp1/524      | R01_cb14480_c5/flp1/524      | R01_cb14480_c5/flp1/524      |
| R01_cb12319_c1/flp0/713      | R01_cb12319_c1/flp0/713  | R01_cb12319_c1/flp0/713      | R01_cb12319_c1/flp0/713      | R01_cb12319_c1/flp0/713      |
| R01_cb2936_c12/flp0/883      | NA                       | R01_cb2936_c12/flp0/883      | NA                           | NA                           |
| R01_cb8564_c10878/flp0/4516  | NA                       | R01_cb8564_c10878/flp0/4516  | NA                           | NA                           |
| R01_cb8564_c118137/flp0/4880 | NA                       | R01_cb8564_c118137/flp0/4880 | NA                           | NA                           |
| R01_cb8160_c1/flp1/2577      | NA                       | NA                           | NA                           | R01_cb8160_c1/flp1/2577      |
| R01_cb5610_c18/flp0/2045     | NA                       | R01_cb5610_c18/flp0/2045     | NA                           | NA                           |
| R01_cb1166_c3/f2p0/2498      | NA                       | R01_cb1166_c3/f2p0/2498      | NA                           | NA                           |
| R01_cb2875_c1/f2p0/3431      | NA                       | NA                           | NA                           | R01_cb2875_c1/f2p0/3431      |
| R01_cb3359_c29/flp0/2584     | NA                       | R01_cb3359_c29/flp0/2584     | NA                           | NA                           |
| R01_cb4829_c15/flp0/2914     | NA                       | NA                           | NA                           | R01_cb4829_c15/flp0/2914     |
| R01_cb13884_c15/flp0/891     | R01_cb13884_c15/flp0/891 | R01_cb13884_c15/flp0/891     | R01_cb13884_c15/flp0/891     | R01_cb13884_c15/flp0/891     |
| R01_cb8564_c115049/flp0/2307 | NA                       | R01_cb8564_c115049/flp0/2307 | R01_cb8564_c115049/flp0/2307 | R01_cb8564_c115049/flp0/2307 |
| R01_cb10908_c1/flp0/2765     | NA                       | R01_cb10908_c1/flp0/2765     | NA                           | NA                           |
| R01_cb1487_c3/flp0/1560      | NA                       | NA                           | NA                           | R01_cb1487_c3/flp0/1560      |
| R01_cb5676_c12/flp0/1708     | NA                       | NA                           | NA                           | R01_cb5676_c12/flp0/1708     |
| R01_cb6504_c1/flp0/2635      | R01_cb6504_c1/flp0/2635  | R01_cb6504_c1/flp0/2635      | R01_cb6504_c1/flp0/2635      | NA                           |
| R01_cb13765_c1/flp0/750      | NA                       | NA                           | NA                           | R01_cb13765_c1/flp0/750      |
| R01_cb8564_c117313/flp0/4753 | NA                       | R01_cb8564_c117313/flp0/4753 | NA                           | R01_cb8564_c117313/flp0/4753 |
| R01_cb1982_c6/flp0/1579      | R01_cb1982_c6/flp0/1579  | NA                           | R01_cb1982_c6/flp0/1579      | R01_cb1982_c6/flp0/1579      |

|                              |                            |                              |                              |                              |
|------------------------------|----------------------------|------------------------------|------------------------------|------------------------------|
| R01_cb8564_c128644/flp0/2050 | NA                         | NA                           | NA                           | R01_cb8564_c128644/flp0/2050 |
| R01_cb6802_c23/flp0/4851     | NA                         | R01_cb6802_c23/flp0/4851     | NA                           | NA                           |
| R01_cb5533_c127/flp0/3774    | NA                         | NA                           | NA                           | R01_cb5533_c127/flp0/3774    |
| R01_cb8564_c120947/flp0/2719 | NA                         | R01_cb8564_c120947/flp0/2719 | R01_cb8564_c120947/flp0/2719 | R01_cb8564_c120947/flp0/2719 |
| R01_cb943_c7/flp0/6060       | NA                         | NA                           | NA                           | R01_cb943_c7/flp0/6060       |
| R01_cb15998_c9/flp0/1708     | NA                         | NA                           | NA                           | R01_cb15998_c9/flp0/1708     |
| R01_cb18456_c3306/flp4/1037  | NA                         | R01_cb18456_c3306/flp4/1037  | NA                           | NA                           |
| R01_cb8564_c88101/flp0/2926  | NA                         | R01_cb8564_c88101/flp0/2926  | NA                           | NA                           |
| R01_cb15407_c8/flp0/386      | R01_cb15407_c8/flp0/386    | R01_cb15407_c8/flp0/386      | R01_cb15407_c8/flp0/386      | R01_cb15407_c8/flp0/386      |
| R01_cb8564_c118779/flp0/2652 | NA                         | NA                           | NA                           | R01_cb8564_c118779/flp0/2652 |
| R01_cb8564_c1355/flp0/2279   | NA                         | R01_cb8564_c1355/flp0/2279   | NA                           | R01_cb8564_c1355/flp0/2279   |
| R01_cb5900_c46/flp0/2044     | NA                         | R01_cb5900_c46/flp0/2044     | NA                           | R01_cb5900_c46/flp0/2044     |
| R01_cb18456_c5193/flp3/628   | R01_cb18456_c5193/flp3/628 | R01_cb18456_c5193/flp3/628   | NA                           | R01_cb18456_c5193/flp3/628   |
| R01_cb17615_c3/flp0/503      | R01_cb17615_c3/flp0/503    | R01_cb17615_c3/flp0/503      | R01_cb17615_c3/flp0/503      | R01_cb17615_c3/flp0/503      |
| R01_cb1982_c4/flp0/1907      | NA                         | NA                           | R01_cb1982_c4/flp0/1907      | R01_cb1982_c4/flp0/1907      |
| R01_cb8564_c15226/flp1/3592  | NA                         | R01_cb8564_c15226/flp1/3592  | NA                           | NA                           |
| R01_cb13895_c3/flp0/591      | NA                         | NA                           | NA                           | R01_cb13895_c3/flp0/591      |
| R01_cb16464_c3/flp0/360      | R01_cb16464_c3/flp0/360    | R01_cb16464_c3/flp0/360      | R01_cb16464_c3/flp0/360      | R01_cb16464_c3/flp0/360      |
| R01_cb8564_c91920/flp0/2089  | NA                         | R01_cb8564_c91920/flp0/2089  | NA                           | NA                           |
| R01_cb8550_c3/flp0/1983      | NA                         | R01_cb8550_c3/flp0/1983      | NA                           | NA                           |
| R01_cb8564_c86974/flp0/2846  | NA                         | R01_cb8564_c86974/flp0/2846  | NA                           | NA                           |
| R01_cb10280_c1/flp0/2387     | NA                         | R01_cb10280_c1/flp0/2387     | NA                           | NA                           |
| R01_cb4583_c12/flp0/3405     | NA                         | R01_cb4583_c12/flp0/3405     | R01_cb4583_c12/flp0/3405     | NA                           |

|                             |                          |                             |                             |                             |
|-----------------------------|--------------------------|-----------------------------|-----------------------------|-----------------------------|
| R01_cb4001_c1/flp0/3463     | NA                       | NA                          | NA                          | R01_cb4001_c1/flp0/3463     |
| R01_cb6348_c8/flp0/2470     | NA                       | NA                          | NA                          | R01_cb6348_c8/flp0/2470     |
| R01_cb9797_c62/flp0/1923    | NA                       | NA                          | NA                          | R01_cb9797_c62/flp0/1923    |
| R01_cb13481_c9/flp0/638     | R01_cb13481_c9/flp0/638  | R01_cb13481_c9/flp0/638     | R01_cb13481_c9/flp0/638     | R01_cb13481_c9/flp0/638     |
| R01_cb16449_c1/flp0/1643    | NA                       | NA                          | NA                          | R01_cb16449_c1/flp0/1643    |
| R01_cb5675_c12/flp0/2610    | NA                       | R01_cb5675_c12/flp0/2610    | NA                          | NA                          |
| R01_cb14911_c5/f2p0/621     | NA                       | NA                          | NA                          | R01_cb14911_c5/f2p0/621     |
| R01_cb6802_c17/flp0/3640    | R01_cb6802_c17/flp0/3640 | R01_cb6802_c17/flp0/3640    | R01_cb6802_c17/flp0/3640    | R01_cb6802_c17/flp0/3640    |
| R01_cb16898_c0/flp1/1761    | NA                       | NA                          | R01_cb16898_c0/flp1/1761    | R01_cb16898_c0/flp1/1761    |
| R01_cb2367_c6/flp0/3206     | NA                       | R01_cb2367_c6/flp0/3206     | NA                          | R01_cb2367_c6/flp0/3206     |
| R01_cb1331_c44/flp1/977     | NA                       | R01_cb1331_c44/flp1/977     | NA                          | NA                          |
| R01_cb4443_c8/flp0/2098     | NA                       | NA                          | NA                          | R01_cb4443_c8/flp0/2098     |
| R01_cb8564_c972/f3p0/2746   | NA                       | NA                          | NA                          | R01_cb8564_c972/f3p0/2746   |
| R01_cb2275_c0/flp0/3981     | NA                       | R01_cb2275_c0/flp0/3981     | R01_cb2275_c0/flp0/3981     | R01_cb2275_c0/flp0/3981     |
| R01_cb3712_c6/flp4/1352     | NA                       | R01_cb3712_c6/flp4/1352     | NA                          | NA                          |
| R01_cb8564_c88737/flp0/3375 | NA                       | R01_cb8564_c88737/flp0/3375 | NA                          | NA                          |
| R01_cb709_c7/flp0/2038      | NA                       | NA                          | R01_cb709_c7/flp0/2038      | NA                          |
| R01_cb8053_c4/flp1/2622     | NA                       | NA                          | NA                          | R01_cb8053_c4/flp1/2622     |
| R01_cb2160_c18/flp1/2853    | NA                       | NA                          | NA                          | R01_cb2160_c18/flp1/2853    |
| R01_cb9745_c0/flp0/1990     | NA                       | R01_cb9745_c0/flp0/1990     | NA                          | NA                          |
| R01_cb5328_c7/flp0/1815     | NA                       | R01_cb5328_c7/flp0/1815     | NA                          | NA                          |
| R01_cb18456_c1416/f5p0/1396 | NA                       | R01_cb18456_c1416/f5p0/1396 | R01_cb18456_c1416/f5p0/1396 | R01_cb18456_c1416/f5p0/1396 |
| R01_cb15361_c1/flp1/786     | NA                       | NA                          | R01_cb15361_c1/flp1/786     | R01_cb15361_c1/flp1/786     |
| R01_cb8564_c87976/flp0/3738 | NA                       | R01_cb8564_c87976/flp0/3738 | NA                          | NA                          |
| R01_cb7966_c4/flp0/851      | NA                       | R01_cb7966_c4/flp0/851      | NA                          | NA                          |
| R01_cb17052_c0/f2p0/1426    | NA                       | NA                          | NA                          | R01_cb17052_c0/f2p0/1426    |

|                              |                             |                              |                              |                              |
|------------------------------|-----------------------------|------------------------------|------------------------------|------------------------------|
| R01_cb17106_c1/flp0/1761     | R01_cb17106_c1/flp0/1761    | R01_cb17106_c1/flp0/1761     | R01_cb17106_c1/flp0/1761     | R01_cb17106_c1/flp0/1761     |
| R01_cb8564_c37658/flp0/2282  | R01_cb8564_c37658/flp0/2282 | R01_cb8564_c37658/flp0/2282  | R01_cb8564_c37658/flp0/2282  | R01_cb8564_c37658/flp0/2282  |
| R01_cb18456_c7151/flp0/713   | R01_cb18456_c7151/flp0/713  | R01_cb18456_c7151/flp0/713   | R01_cb18456_c7151/flp0/713   | R01_cb18456_c7151/flp0/713   |
| R01_cb8564_c109761/f2p0/2936 | NA                          | R01_cb8564_c109761/f2p0/2936 | R01_cb8564_c109761/f2p0/2936 | R01_cb8564_c109761/f2p0/2936 |
| R01_cb4600_c4/flp0/3249      | NA                          | NA                           | NA                           | R01_cb4600_c4/flp0/3249      |
| R01_cb6456_c1/f2p0/2477      | R01_cb6456_c1/f2p0/2477     | R01_cb6456_c1/f2p0/2477      | NA                           | R01_cb6456_c1/f2p0/2477      |
| R01_cb18456_c5053/flp1/655   | R01_cb18456_c5053/flp1/655  | NA                           | R01_cb18456_c5053/flp1/655   | R01_cb18456_c5053/flp1/655   |
| R01_cb1487_c8/flp0/1320      | NA                          | NA                           | NA                           | R01_cb1487_c8/flp0/1320      |
| R01_cb13178_c14/flp0/675     | R01_cb13178_c14/flp0/675    | R01_cb13178_c14/flp0/675     | NA                           | NA                           |
| R01_cb793_c0/flp0/4632       | NA                          | R01_cb793_c0/flp0/4632       | NA                           | NA                           |
| R01_cb5635_c6/flp0/750       | NA                          | NA                           | NA                           | R01_cb5635_c6/flp0/750       |
| R01_cb18057_c0/f2p1/465      | R01_cb18057_c0/f2p1/465     | R01_cb18057_c0/f2p1/465      | R01_cb18057_c0/f2p1/465      | R01_cb18057_c0/f2p1/465      |
| R01_cb5890_c2/flp0/2643      | NA                          | R01_cb5890_c2/flp0/2643      | NA                           | NA                           |
| R01_cb8564_c79574/flp0/3664  | NA                          | R01_cb8564_c79574/flp0/3664  | NA                           | NA                           |
| R01_cb4147_c19/flp0/2317     | NA                          | NA                           | NA                           | R01_cb4147_c19/flp0/2317     |
| R01_cb5471_c11/flp0/2489     | NA                          | NA                           | NA                           | R01_cb5471_c11/flp0/2489     |
| R01_cb10952_c2/flp0/1548     | NA                          | NA                           | NA                           | R01_cb10952_c2/flp0/1548     |
| R01_cb8564_c89726/flp0/2352  | R01_cb8564_c89726/flp0/2352 | R01_cb8564_c89726/flp0/2352  | R01_cb8564_c89726/flp0/2352  | R01_cb8564_c89726/flp0/2352  |
| R01_cb10653_c3/flp0/1995     | R01_cb10653_c3/flp0/1995    | R01_cb10653_c3/flp0/1995     | NA                           | NA                           |
| R01_cb18456_c4974/flp0/364   | R01_cb18456_c4974/flp0/364  | R01_cb18456_c4974/flp0/364   | R01_cb18456_c4974/flp0/364   | R01_cb18456_c4974/flp0/364   |
| R01_cb8564_c86774/flp0/3078  | NA                          | NA                           | NA                           | R01_cb8564_c86774/flp0/3078  |
| R01_cb17899_c1/flp0/413      | R01_cb17899_c1/flp0/413     | R01_cb17899_c1/flp0/413      | NA                           | R01_cb17899_c1/flp0/413      |
| R01_cb18409_c34/flp1/966     | NA                          | R01_cb18409_c34/flp1/966     | NA                           | NA                           |

|                             |                          |                            |                           |                             |
|-----------------------------|--------------------------|----------------------------|---------------------------|-----------------------------|
| R01_cb3750_c16/flp0/3161    | NA                       | NA                         | NA                        | R01_cb3750_c16/flp0/3161    |
| R01_cb17757_c1/flp0/1269    | NA                       | NA                         | NA                        | R01_cb17757_c1/flp0/1269    |
| R01_cb1964_c6/flp0/2048     | NA                       | NA                         | NA                        | R01_cb1964_c6/flp0/2048     |
| R01_cb14940_c2/flp0/732     | NA                       | R01_cb14940_c2/flp0/732    | R01_cb14940_c2/flp0/732   | R01_cb14940_c2/flp0/732     |
| R01_cb16888_c5/flp0/774     | NA                       | NA                         | R01_cb16888_c5/flp0/774   | R01_cb16888_c5/flp0/774     |
| R01_cb4490_c11/flp0/2391    | NA                       | NA                         | NA                        | R01_cb4490_c11/flp0/2391    |
| R01_cb15913_c2/flp0/942     | NA                       | R01_cb15913_c2/flp0/942    | R01_cb15913_c2/flp0/942   | R01_cb15913_c2/flp0/942     |
| R01_cb13392_c7/f3p0/604     | R01_cb13392_c7/f3p0/604  | R01_cb13392_c7/f3p0/604    | R01_cb13392_c7/f3p0/604   | R01_cb13392_c7/f3p0/604     |
| R01_cb17392_c0/flp0/904     | NA                       | NA                         | R01_cb17392_c0/flp0/904   | R01_cb17392_c0/flp0/904     |
| R01_cb16176_c1/flp0/1202    | NA                       | NA                         | NA                        | R01_cb16176_c1/flp0/1202    |
| R01_cb15681_c1/flp0/1337    | NA                       | R01_cb15681_c1/flp0/1337   | NA                        | NA                          |
| R01_cb11944_c11/flp0/1618   | NA                       | NA                         | R01_cb11944_c11/flp0/1618 | R01_cb11944_c11/flp0/1618   |
| R01_cb12314_c3/flp0/545     | NA                       | NA                         | R01_cb12314_c3/flp0/545   | NA                          |
| R01_cb119_c33/flp0/3141     | NA                       | R01_cb119_c33/flp0/3141    | NA                        | R01_cb119_c33/flp0/3141     |
| R01_cb5565_c82/flp0/1025    | R01_cb5565_c82/flp0/1025 | R01_cb5565_c82/flp0/1025   | R01_cb5565_c82/flp0/1025  | R01_cb5565_c82/flp0/1025    |
| R01_cb7367_c1/f5p1/2481     | NA                       | NA                         | NA                        | R01_cb7367_c1/f5p1/2481     |
| R01_cb8564_c2670/flp0/2170  | NA                       | R01_cb8564_c2670/flp0/2170 | NA                        | NA                          |
| R01_cb10148_c3/flp0/1907    | NA                       | NA                         | NA                        | R01_cb10148_c3/flp0/1907    |
| R01_cb17656_c0/f7p0/662     | NA                       | R01_cb17656_c0/f7p0/662    | R01_cb17656_c0/f7p0/662   | R01_cb17656_c0/f7p0/662     |
| R01_cb4555_c5/flp0/915      | NA                       | NA                         | NA                        | R01_cb4555_c5/flp0/915      |
| R01_cb2033_c9/flp0/2609     | NA                       | NA                         | NA                        | R01_cb2033_c9/flp0/2609     |
| R01_cb3750_c31/flp0/2307    | NA                       | NA                         | NA                        | R01_cb3750_c31/flp0/2307    |
| R01_cb8564_c114998/flp0/312 | NA                       | NA                         | NA                        | R01_cb8564_c114998/flp0/312 |
| 4                           |                          |                            |                           | 4                           |
| R01_cb8564_c84495/flp0/3631 | NA                       | NA                         | NA                        | R01_cb8564_c84495/flp0/3631 |
| R01_cb14715_c2/f2p0/561     | R01_cb14715_c2/f2p0/561  | R01_cb14715_c2/f2p0/561    | R01_cb14715_c2/f2p0/561   | R01_cb14715_c2/f2p0/561     |

|                              |                              |                              |                              |                              |
|------------------------------|------------------------------|------------------------------|------------------------------|------------------------------|
| R01_cb12931_c18/flp0/797     | R01_cb12931_c18/flp0/797     | R01_cb12931_c18/flp0/797     | R01_cb12931_c18/flp0/797     | R01_cb12931_c18/flp0/797     |
| R01_cb11141_c2/flp0/2779     | NA                           | NA                           | R01_cb11141_c2/flp0/2779     | R01_cb11141_c2/flp0/2779     |
| R01_cb7171_c12/flp1/2562     | NA                           | NA                           | NA                           | R01_cb7171_c12/flp1/2562     |
| R01_cb7006_c1/flp0/1908      | NA                           | R01_cb7006_c1/flp0/1908      | NA                           | NA                           |
| R01_cb9777_c2/flp0/1970      | NA                           | NA                           | NA                           | R01_cb9777_c2/flp0/1970      |
| R01_cb15428_c1/flp0/542      | R01_cb15428_c1/flp0/542      | R01_cb15428_c1/flp0/542      | R01_cb15428_c1/flp0/542      | R01_cb15428_c1/flp0/542      |
| R01_cb8564_c38787/flp0/3773  | NA                           | R01_cb8564_c38787/flp0/3773  | NA                           | NA                           |
| R01_cb8564_c81003/flp0/4196  | NA                           | NA                           | NA                           | R01_cb8564_c81003/flp0/4196  |
| R01_cb15237_c1/flp0/1114     | NA                           | R01_cb15237_c1/flp0/1114     | R01_cb15237_c1/flp0/1114     | R01_cb15237_c1/flp0/1114     |
| R01_cb4105_c13/flp0/1483     | R01_cb4105_c13/flp0/1483     | R01_cb4105_c13/flp0/1483     | R01_cb4105_c13/flp0/1483     | R01_cb4105_c13/flp0/1483     |
| R01_cb4059_c5/flp0/1492      | NA                           | NA                           | NA                           | R01_cb4059_c5/flp0/1492      |
| R01_cb8564_c119168/flp0/2675 | R01_cb8564_c119168/flp0/2675 | R01_cb8564_c119168/flp0/2675 | R01_cb8564_c119168/flp0/2675 | R01_cb8564_c119168/flp0/2675 |
| R01_cb9932_c3/flp0/802       | R01_cb9932_c3/flp0/802       | R01_cb9932_c3/flp0/802       | NA                           | NA                           |
| R01_cb9626_c2/flp0/3565      | NA                           | R01_cb9626_c2/flp0/3565      | NA                           | NA                           |
| R01_cb13478_c8/flp0/406      | NA                           | R01_cb13478_c8/flp0/406      | R01_cb13478_c8/flp0/406      | R01_cb13478_c8/flp0/406      |
| R01_cb1388_c8/flp0/4718      | NA                           | NA                           | NA                           | R01_cb1388_c8/flp0/4718      |
| R01_cb8032_c1/flp0/2543      | NA                           | R01_cb8032_c1/flp0/2543      | NA                           | NA                           |
| R01_cb4117_c5/flp1/3183      | NA                           | NA                           | NA                           | R01_cb4117_c5/flp1/3183      |
| R01_cb12427_c4/flp0/1352     | NA                           | R01_cb12427_c4/flp0/1352     | NA                           | R01_cb12427_c4/flp0/1352     |
| R01_cb1489_c4/flp0/3013      | NA                           | NA                           | R01_cb1489_c4/flp0/3013      | NA                           |
| R01_cb8110_c1/flp1/2518      | NA                           | R01_cb8110_c1/flp1/2518      | R01_cb8110_c1/flp1/2518      | NA                           |
| R01_cb5075_c3/flp0/6053      | NA                           | NA                           | NA                           | R01_cb5075_c3/flp0/6053      |
| R01_cb8564_c4909/flp0/3122   | R01_cb8564_c4909/flp0/3122   | R01_cb8564_c4909/flp0/3122   | R01_cb8564_c4909/flp0/3122   | R01_cb8564_c4909/flp0/3122   |
| R01_cb18456_c6760/flp0/571   | NA                           | R01_cb18456_c6760/flp0/571   | R01_cb18456_c6760/flp0/571   | NA                           |
| R01_cb2528_c1/flp1/3892      | NA                           | R01_cb2528_c1/flp1/3892      | NA                           | NA                           |



|                             |                             |                             |                             |                             |
|-----------------------------|-----------------------------|-----------------------------|-----------------------------|-----------------------------|
| R01_cb18321_c0/f5p1/332     | R01_cb18321_c0/f5p1/332     | R01_cb18321_c0/f5p1/332     | R01_cb18321_c0/f5p1/332     | R01_cb18321_c0/f5p1/332     |
| R01_cb15176_c0/flp0/813     | NA                          | R01_cb15176_c0/flp0/813     | NA                          | NA                          |
| R01_cb17838_c1/flp0/1301    | R01_cb17838_c1/flp0/1301    | R01_cb17838_c1/flp0/1301    | R01_cb17838_c1/flp0/1301    | R01_cb17838_c1/flp0/1301    |
| R01_cb17458_c1/f2p0/730     | NA                          | NA                          | NA                          | R01_cb17458_c1/f2p0/730     |
| R01_cb2072_c27/flp0/2074    | NA                          | R01_cb2072_c27/flp0/2074    | NA                          | NA                          |
| R01_cb17668_c2/f2p0/771     | NA                          | NA                          | NA                          | R01_cb17668_c2/f2p0/771     |
| R01_cb8823_c4/flp1/2080     | NA                          | NA                          | NA                          | R01_cb8823_c4/flp1/2080     |
| R01_cb1610_c0/f4p0/2572     | NA                          | NA                          | NA                          | R01_cb1610_c0/f4p0/2572     |
| R01_cb17359_c2/flp0/448     | R01_cb17359_c2/flp0/448     | R01_cb17359_c2/flp0/448     | R01_cb17359_c2/flp0/448     | R01_cb17359_c2/flp0/448     |
| R01_cb8564_c130368/flp0/333 | R01_cb8564_c130368/flp0/333 | R01_cb8564_c130368/flp0/333 | R01_cb8564_c130368/flp0/333 | R01_cb8564_c130368/flp0/333 |
| 1                           | 31                          | 1                           | 1                           | 1                           |
| R01_cb10300_c5/flp0/1611    | NA                          | NA                          | NA                          | R01_cb10300_c5/flp0/1611    |
| R01_cb6258_c8/f2p1/2472     | NA                          | NA                          | NA                          | R01_cb6258_c8/f2p1/2472     |
| R01_cb18456_c7460/flp0/747  | NA                          | R01_cb18456_c7460/flp0/747  | NA                          | NA                          |
| R01_cb8900_c8/flp0/1988     | NA                          | NA                          | NA                          | R01_cb8900_c8/flp0/1988     |
| R01_cb5183_c19/flp0/3158    | NA                          | NA                          | NA                          | R01_cb5183_c19/flp0/3158    |
| R01_cb4824_c0/f3p0/796      | NA                          | R01_cb4824_c0/f3p0/796      | NA                          | R01_cb4824_c0/f3p0/796      |
| R01_cb17398_c2/flp0/316     | R01_cb17398_c2/flp0/316     | R01_cb17398_c2/flp0/316     | R01_cb17398_c2/flp0/316     | R01_cb17398_c2/flp0/316     |
| R01_cb8564_c34059/f2p0/2420 | NA                          | R01_cb8564_c34059/f2p0/2420 | NA                          | NA                          |
| R01_cb8564_c74681/flp0/2062 | NA                          | R01_cb8564_c74681/flp0/2062 | NA                          | R01_cb8564_c74681/flp0/2062 |
| R01_cb1658_c34/flp0/2745    | NA                          | NA                          | NA                          | R01_cb1658_c34/flp0/2745    |
| R01_cb11278_c4/flp1/2818    | NA                          | NA                          | NA                          | R01_cb11278_c4/flp1/2818    |
| R01_cb7443_c3/flp0/751      | R01_cb7443_c3/flp0/751      | R01_cb7443_c3/flp0/751      | R01_cb7443_c3/flp0/751      | R01_cb7443_c3/flp0/751      |
| R01_cb3287_c0/f2p0/1511     | NA                          | NA                          | NA                          | R01_cb3287_c0/f2p0/1511     |
| R01_cb6551_c3/flp0/1692     | R01_cb6551_c3/flp0/1692     | R01_cb6551_c3/flp0/1692     | R01_cb6551_c3/flp0/1692     | R01_cb6551_c3/flp0/1692     |
| R01_cb7096_c45/flp1/1601    | R01_cb7096_c45/flp1/1601    | R01_cb7096_c45/flp1/1601    | R01_cb7096_c45/flp1/1601    | R01_cb7096_c45/flp1/1601    |

|                              |                           |                             |                             |                              |
|------------------------------|---------------------------|-----------------------------|-----------------------------|------------------------------|
| R01_cb1894_c1/f2p0/2614      | NA                        | R01_cb1894_c1/f2p0/2614     | NA                          | R01_cb1894_c1/f2p0/2614      |
| R01_cb8564_c71555/f2p0/3701  | NA                        | R01_cb8564_c71555/f2p0/3701 | NA                          | NA                           |
| R01_cb4563_c9/f1p0/3283      | NA                        | R01_cb4563_c9/f1p0/3283     | NA                          | NA                           |
| R01_cb822_c22/f1p0/2751      | NA                        | NA                          | NA                          | R01_cb822_c22/f1p0/2751      |
| R01_cb8564_c117666/f1p0/2490 | NA                        | NA                          | NA                          | R01_cb8564_c117666/f1p0/2490 |
| R01_cb8126_c3/f1p0/1011      | R01_cb8126_c3/f1p0/1011   | R01_cb8126_c3/f1p0/1011     | NA                          | NA                           |
| R01_cb3774_c57/f1p0/2143     | NA                        | NA                          | NA                          | R01_cb3774_c57/f1p0/2143     |
| R01_cb11121_c0/f2p0/1034     | NA                        | NA                          | NA                          | R01_cb11121_c0/f2p0/1034     |
| R01_cb11924_c19/f1p0/512     | R01_cb11924_c19/f1p0/512  | R01_cb11924_c19/f1p0/512    | R01_cb11924_c19/f1p0/512    | NA                           |
| R01_cb8252_c10/f4p0/2328     | NA                        | NA                          | NA                          | R01_cb8252_c10/f4p0/2328     |
| R01_cb12037_c6/f1p0/1610     | NA                        | NA                          | R01_cb12037_c6/f1p0/1610    | NA                           |
| R01_cb8978_c2/f1p0/3019      | R01_cb8978_c2/f1p0/3019   | R01_cb8978_c2/f1p0/3019     | NA                          | NA                           |
| R01_cb5558_c0/f1p0/3072      | NA                        | R01_cb5558_c0/f1p0/3072     | NA                          | NA                           |
| R01_cb2284_c36/f1p0/591      | NA                        | R01_cb2284_c36/f1p0/591     | NA                          | NA                           |
| R01_cb17076_c3/f1p0/786      | NA                        | NA                          | NA                          | R01_cb17076_c3/f1p0/786      |
| R01_cb16281_c13/f1p0/1150    | R01_cb16281_c13/f1p0/1150 | NA                          | NA                          | NA                           |
| R01_cb4370_c14/f1p0/623      | R01_cb4370_c14/f1p0/623   | R01_cb4370_c14/f1p0/623     | NA                          | R01_cb4370_c14/f1p0/623      |
| R01_cb16414_c0/f2p0/1723     | NA                        | R01_cb16414_c0/f2p0/1723    | NA                          | NA                           |
| R01_cb2632_c0/f3p0/669       | R01_cb2632_c0/f3p0/669    | R01_cb2632_c0/f3p0/669      | R01_cb2632_c0/f3p0/669      | R01_cb2632_c0/f3p0/669       |
| R01_cb11002_c2/f1p0/1923     | NA                        | R01_cb11002_c2/f1p0/1923    | NA                          | R01_cb11002_c2/f1p0/1923     |
| R01_cb18331_c94/f1p0/4079    | NA                        | R01_cb18331_c94/f1p0/4079   | NA                          | NA                           |
| R01_cb8564_c89668/f1p0/2043  | NA                        | R01_cb8564_c89668/f1p0/2043 | NA                          | NA                           |
| R01_cb2320_c4/f1p0/4172      | NA                        | NA                          | NA                          | R01_cb2320_c4/f1p0/4172      |
| R01_cb4188_c11/f1p0/3048     | R01_cb4188_c11/f1p0/3048  | R01_cb4188_c11/f1p0/3048    | NA                          | NA                           |
| R01_cb8564_c75644/f1p0/2497  | NA                        | R01_cb8564_c75644/f1p0/2497 | R01_cb8564_c75644/f1p0/2497 | R01_cb8564_c75644/f1p0/2497  |

|                              |                          |                              |                         |                              |
|------------------------------|--------------------------|------------------------------|-------------------------|------------------------------|
| R01_cb16100_c6/flp0/519      | R01_cb16100_c6/flp0/519  | R01_cb16100_c6/flp0/519      | R01_cb16100_c6/flp0/519 | R01_cb16100_c6/flp0/519      |
| R01_cb6802_c73/flp0/2190     | NA                       | R01_cb6802_c73/flp0/2190     | NA                      | NA                           |
| R01_cb10475_c2/flp0/2375     | NA                       | R01_cb10475_c2/flp0/2375     | NA                      | R01_cb10475_c2/flp0/2375     |
| R01_cb14808_c2/flp0/579      | R01_cb14808_c2/flp0/579  | R01_cb14808_c2/flp0/579      | NA                      | R01_cb14808_c2/flp0/579      |
| R01_cb15094_c1/flp0/1053     | NA                       | NA                           | NA                      | R01_cb15094_c1/flp0/1053     |
| R01_cb1458_c2/flp0/3204      | NA                       | R01_cb1458_c2/flp0/3204      | NA                      | NA                           |
| R01_cb8564_c15543/flp1/4073  | NA                       | NA                           | NA                      | R01_cb8564_c15543/flp1/4073  |
| R01_cb16387_c5/flp0/1527     | NA                       | NA                           | NA                      | R01_cb16387_c5/flp0/1527     |
| R01_cb13996_c6/flp0/742      | NA                       | R01_cb13996_c6/flp0/742      | NA                      | NA                           |
| R01_cb8564_c148356/f4p0/2099 | NA                       | NA                           | NA                      | R01_cb8564_c148356/f4p0/2099 |
| R01_cb5690_c8/fl1p0/1087     | NA                       | NA                           | NA                      | R01_cb5690_c8/fl1p0/1087     |
| R01_cb8564_c13528/flp0/3013  | NA                       | R01_cb8564_c13528/flp0/3013  | NA                      | R01_cb8564_c13528/flp0/3013  |
| R01_cb18654_c5/flp0/1646     | NA                       | NA                           | NA                      | R01_cb18654_c5/flp0/1646     |
| R01_cb6059_c0/f3p1/2019      | NA                       | NA                           | NA                      | R01_cb6059_c0/f3p1/2019      |
| R01_cb18456_c5359/flp0/910   | NA                       | R01_cb18456_c5359/flp0/910   | NA                      | NA                           |
| R01_cb13663_c1/flp0/835      | NA                       | NA                           | NA                      | R01_cb13663_c1/flp0/835      |
| R01_cb1915_c19/flp0/3025     | R01_cb1915_c19/flp0/3025 | R01_cb1915_c19/flp0/3025     | NA                      | NA                           |
| R01_cb7143_c13/flp0/1382     | R01_cb7143_c13/flp0/1382 | R01_cb7143_c13/flp0/1382     | NA                      | R01_cb7143_c13/flp0/1382     |
| R01_cb14336_c0/f2p1/501      | NA                       | R01_cb14336_c0/f2p1/501      | R01_cb14336_c0/f2p1/501 | R01_cb14336_c0/f2p1/501      |
| R01_cb8564_c25268/flp0/3377  | NA                       | R01_cb8564_c25268/flp0/3377  | NA                      | NA                           |
| R01_cb8564_c112333/flp0/2553 | NA                       | R01_cb8564_c112333/flp0/2553 | NA                      | NA                           |
| R01_cb8564_c11406/flp0/3425  | NA                       | R01_cb8564_c11406/flp0/3425  | NA                      | NA                           |
| R01_cb11220_c1/flp0/3263     | NA                       | R01_cb11220_c1/flp0/3263     | NA                      | NA                           |
| R01_cb1626_c5/flp1/4242      | NA                       | NA                           | NA                      | R01_cb1626_c5/flp1/4242      |

|                                  |                                  |                                  |                                  |                                  |
|----------------------------------|----------------------------------|----------------------------------|----------------------------------|----------------------------------|
| R01_cb8564_c111149/f1p0/358<br>8 | NA                               | NA                               | R01_cb8564_c111149/f1p0/358<br>8 | R01_cb8564_c111149/f1p0/358<br>8 |
| R01_cb8564_c76727/f1p0/3005      | NA                               | R01_cb8564_c76727/f1p0/3005      | NA                               | R01_cb8564_c76727/f1p0/3005      |
| R01_cb12691_c5/f2p0/1064         | NA                               | R01_cb12691_c5/f2p0/1064         | NA                               | NA                               |
| R01_cb11557_c0/f1p1/929          | R01_cb11557_c0/f1p1/929          | R01_cb11557_c0/f1p1/929          | NA                               | R01_cb11557_c0/f1p1/929          |
| R01_cb8564_c119574/f1p0/183<br>2 | NA                               | NA                               | NA                               | R01_cb8564_c119574/f1p0/183<br>2 |
| R01_cb3485_c5/f1p1/2452          | NA                               | R01_cb3485_c5/f1p1/2452          | NA                               | NA                               |
| R01_cb13464_c6/f1p0/1344         | NA                               | R01_cb13464_c6/f1p0/1344         | NA                               | NA                               |
| R01_cb8564_c72220/f1p1/3491      | NA                               | NA                               | NA                               | R01_cb8564_c72220/f1p1/3491      |
| R01_cb10539_c2/f1p0/4443         | NA                               | R01_cb10539_c2/f1p0/4443         | NA                               | R01_cb10539_c2/f1p0/4443         |
| R01_cb15158_c0/f1p0/850          | NA                               | NA                               | NA                               | R01_cb15158_c0/f1p0/850          |
| R01_cb4185_c0/f2p0/3264          | R01_cb4185_c0/f2p0/3264          | R01_cb4185_c0/f2p0/3264          | NA                               | R01_cb4185_c0/f2p0/3264          |
| R01_cb18111_c1/f1p0/1682         | NA                               | R01_cb18111_c1/f1p0/1682         | NA                               | NA                               |
| R01_cb11643_c1/f1p0/2151         | NA                               | R01_cb11643_c1/f1p0/2151         | NA                               | NA                               |
| R01_cb15811_c34/f1p0/863         | NA                               | R01_cb15811_c34/f1p0/863         | R01_cb15811_c34/f1p0/863         | R01_cb15811_c34/f1p0/863         |
| R01_cb8564_c19423/f1p0/3401<br>1 | R01_cb8564_c19423/f1p0/3401<br>1 | R01_cb8564_c19423/f1p0/3401      | NA                               | NA                               |
| R01_cb8564_c115314/f1p0/294<br>0 | NA                               | R01_cb8564_c115314/f1p0/294<br>0 | NA                               | R01_cb8564_c115314/f1p0/294<br>0 |
| R01_cb8564_c109438/f2p1/197<br>6 | NA                               | R01_cb8564_c109438/f2p1/197<br>6 | NA                               | NA                               |
| R01_cb14301_c1/f1p0/507          | NA                               | R01_cb14301_c1/f1p0/507          | NA                               | NA                               |
| R01_cb9646_c2/f1p0/2155          | NA                               | NA                               | NA                               | R01_cb9646_c2/f1p0/2155          |
| R01_cb17853_c3/f1p0/1669         | NA                               | NA                               | NA                               | R01_cb17853_c3/f1p0/1669         |
| R01_cb34_c4/f1p0/3669            | NA                               | NA                               | NA                               | R01_cb34_c4/f1p0/3669            |

|                             |                            |                             |                             |                             |
|-----------------------------|----------------------------|-----------------------------|-----------------------------|-----------------------------|
| R01_cb5900_c107/flp0/2174   | NA                         | R01_cb5900_c107/flp0/2174   | NA                          | R01_cb5900_c107/flp0/2174   |
| R01_cb8564_c2795/flp1/1923  | NA                         | R01_cb8564_c2795/flp1/1923  | NA                          | NA                          |
| R01_cb6658_c2/flp0/2087     | NA                         | R01_cb6658_c2/flp0/2087     | NA                          | NA                          |
| R01_cb18456_c7150/flp1/1607 | NA                         | R01_cb18456_c7150/flp1/1607 | R01_cb18456_c7150/flp1/1607 | R01_cb18456_c7150/flp1/1607 |
| R01_cb14192_c8/flp0/1817    | NA                         | R01_cb14192_c8/flp0/1817    | R01_cb14192_c8/flp0/1817    | R01_cb14192_c8/flp0/1817    |
| R01_cb2770_c70/flp0/2266    | NA                         | R01_cb2770_c70/flp0/2266    | R01_cb2770_c70/flp0/2266    | NA                          |
| R01_cb14729_c1/f4p2/649     | NA                         | R01_cb14729_c1/f4p2/649     | NA                          | NA                          |
| R01_cb2870_c2/f2p1/2681     | NA                         | NA                          | NA                          | R01_cb2870_c2/f2p1/2681     |
| R01_cb9662_c0/flp0/2008     | NA                         | R01_cb9662_c0/flp0/2008     | NA                          | R01_cb9662_c0/flp0/2008     |
| R01_cb16217_c1/flp0/1058    | NA                         | NA                          | NA                          | R01_cb16217_c1/flp0/1058    |
| R01_cb7398_c7/flp0/1764     | NA                         | NA                          | NA                          | R01_cb7398_c7/flp0/1764     |
| R01_cb8564_c16834/flp0/2308 | NA                         | R01_cb8564_c16834/flp0/2308 | R01_cb8564_c16834/flp0/2308 | R01_cb8564_c16834/flp0/2308 |
| R01_cb2447_c0/flp0/3927     | NA                         | R01_cb2447_c0/flp0/3927     | NA                          | NA                          |
| R01_cb8564_c69797/flp0/2711 | NA                         | R01_cb8564_c69797/flp0/2711 | R01_cb8564_c69797/flp0/2711 | R01_cb8564_c69797/flp0/2711 |
| R01_cb7920_c0/flp0/2502     | NA                         | NA                          | R01_cb7920_c0/flp0/2502     | R01_cb7920_c0/flp0/2502     |
| R01_cb13597_c15/flp0/504    | R01_cb13597_c15/flp0/504   | R01_cb13597_c15/flp0/504    | R01_cb13597_c15/flp0/504    | R01_cb13597_c15/flp0/504    |
| R01_cb7731_c10/flp0/468     | NA                         | R01_cb7731_c10/flp0/468     | NA                          | R01_cb7731_c10/flp0/468     |
| R01_cb18456_c7236/flp0/558  | R01_cb18456_c7236/flp0/558 | R01_cb18456_c7236/flp0/558  | R01_cb18456_c7236/flp0/558  | R01_cb18456_c7236/flp0/558  |
| R01_cb11035_c1/flp0/2518    | NA                         | NA                          | R01_cb11035_c1/flp0/2518    | R01_cb11035_c1/flp0/2518    |
| R01_cb1508_c7/flp0/3465     | NA                         | NA                          | NA                          | R01_cb1508_c7/flp0/3465     |
| R01_cb18456_c1675/f2p0/593  | R01_cb18456_c1675/f2p0/593 | R01_cb18456_c1675/f2p0/593  | R01_cb18456_c1675/f2p0/593  | R01_cb18456_c1675/f2p0/593  |
| R01_cb8564_c78224/flp0/3892 | NA                         | NA                          | NA                          | R01_cb8564_c78224/flp0/3892 |
| R01_cb14221_c0/flp0/1011    | NA                         | R01_cb14221_c0/flp0/1011    | NA                          | NA                          |
| R01_cb5902_c3/flp0/1898     | NA                         | R01_cb5902_c3/flp0/1898     | NA                          | NA                          |
| R01_cb8564_c5089/flp0/2122  | NA                         | NA                          | NA                          | R01_cb8564_c5089/flp0/2122  |
| R01_cb12215_c5/f9p0/973     | NA                         | NA                          | R01_cb12215_c5/f9p0/973     | R01_cb12215_c5/f9p0/973     |

|                             |                          |                             |                          |                             |
|-----------------------------|--------------------------|-----------------------------|--------------------------|-----------------------------|
| R01_cb8564_c4723/flp0/3027  | NA                       | NA                          | NA                       | R01_cb8564_c4723/flp0/3027  |
| R01_cb18619_c1/flp0/3614    | NA                       | R01_cb18619_c1/flp0/3614    | R01_cb18619_c1/flp0/3614 | NA                          |
| R01_cb11078_c2/flp0/530     | NA                       | R01_cb11078_c2/flp0/530     | R01_cb11078_c2/flp0/530  | R01_cb11078_c2/flp0/530     |
| R01_cb18659_c1/flp0/346     | NA                       | R01_cb18659_c1/flp0/346     | R01_cb18659_c1/flp0/346  | NA                          |
| R01_cb18456_c6269/flp0/883  | NA                       | R01_cb18456_c6269/flp0/883  | NA                       | R01_cb18456_c6269/flp0/883  |
| R01_cb3308_c12/flp1/2200    | NA                       | R01_cb3308_c12/flp1/2200    | NA                       | NA                          |
| R01_cb11476_c1/flp0/2138    | NA                       | R01_cb11476_c1/flp0/2138    | R01_cb11476_c1/flp0/2138 | R01_cb11476_c1/flp0/2138    |
| R01_cb5667_c27/flp0/695     | NA                       | R01_cb5667_c27/flp0/695     | NA                       | R01_cb5667_c27/flp0/695     |
| R01_cb8564_c50656/flp0/4642 | NA                       | R01_cb8564_c50656/flp0/4642 | NA                       | R01_cb8564_c50656/flp0/4642 |
| R01_cb16093_c1/flp0/1549    | NA                       | R01_cb16093_c1/flp0/1549    | NA                       | NA                          |
| R01_cb11840_c0/flp0/969     | NA                       | NA                          | NA                       | R01_cb11840_c0/flp0/969     |
| R01_cb15360_c2/flp0/1371    | R01_cb15360_c2/flp0/1371 | R01_cb15360_c2/flp0/1371    | R01_cb15360_c2/flp0/1371 | R01_cb15360_c2/flp0/1371    |
| R01_cb7802_c24/f6p1/1743    | NA                       | NA                          | NA                       | R01_cb7802_c24/f6p1/1743    |
| R01_cb9985_c0/flp0/1892     | NA                       | R01_cb9985_c0/flp0/1892     | NA                       | NA                          |
| R01_cb6601_c3/flp0/973      | NA                       | R01_cb6601_c3/flp0/973      | NA                       | NA                          |
| R01_cb12786_c26/flp0/613    | R01_cb12786_c26/flp0/613 | NA                          | NA                       | NA                          |
| R01_cb6365_c7/flp0/3467     | NA                       | R01_cb6365_c7/flp0/3467     | NA                       | NA                          |
| R01_cb9729_c9/flp0/611      | R01_cb9729_c9/flp0/611   | R01_cb9729_c9/flp0/611      | NA                       | R01_cb9729_c9/flp0/611      |
| R01_cb18355_c0/flp0/308     | R01_cb18355_c0/flp0/308  | R01_cb18355_c0/flp0/308     | R01_cb18355_c0/flp0/308  | R01_cb18355_c0/flp0/308     |
| R01_cb7795_c5/flp0/2209     | NA                       | NA                          | NA                       | R01_cb7795_c5/flp0/2209     |
| R01_cb9535_c22/flp0/1083    | NA                       | R01_cb9535_c22/flp0/1083    | R01_cb9535_c22/flp0/1083 | R01_cb9535_c22/flp0/1083    |
| R01_cb13490_c5/flp0/841     | R01_cb13490_c5/flp0/841  | R01_cb13490_c5/flp0/841     | R01_cb13490_c5/flp0/841  | R01_cb13490_c5/flp0/841     |
| R01_cb9022_c1/f2p0/1726     | NA                       | NA                          | NA                       | R01_cb9022_c1/f2p0/1726     |
| R01_cb16997_c58/flp0/2433   | NA                       | R01_cb16997_c58/flp0/2433   | NA                       | NA                          |
| R01_cb15766_c2/flp0/1534    | NA                       | NA                          | NA                       | R01_cb15766_c2/flp0/1534    |
| R01_cb16125_c17/flp0/1780   | NA                       | R01_cb16125_c17/flp0/1780   | NA                       | NA                          |

|                              |                             |                             |                             |                              |
|------------------------------|-----------------------------|-----------------------------|-----------------------------|------------------------------|
| R01_cb8564_c4802/flp0/3192   | NA                          | R01_cb8564_c4802/flp0/3192  | NA                          | NA                           |
| R01_cb18456_c1882/flp0/956   | R01_cb18456_c1882/flp0/956  | R01_cb18456_c1882/flp0/956  | R01_cb18456_c1882/flp0/956  | R01_cb18456_c1882/flp0/956   |
| R01_cb8564_c84450/flp0/4007  | NA                          | R01_cb8564_c84450/flp0/4007 | NA                          | NA                           |
| R01_cb8564_c85136/f4p0/2456  | NA                          | R01_cb8564_c85136/f4p0/2456 | R01_cb8564_c85136/f4p0/2456 | NA                           |
| R01_cb17662_c1/flp0/871      | NA                          | R01_cb17662_c1/flp0/871     | NA                          | NA                           |
| R01_cb7258_c0/flp0/2661      | NA                          | R01_cb7258_c0/flp0/2661     | R01_cb7258_c0/flp0/2661     | NA                           |
| R01_cb14334_c4/flp0/975      | NA                          | NA                          | NA                          | R01_cb14334_c4/flp0/975      |
| R01_cb7362_c6/flp1/2256      | R01_cb7362_c6/flp1/2256     | R01_cb7362_c6/flp1/2256     | NA                          | NA                           |
| R01_cb13478_c10/flp0/550     | NA                          | R01_cb13478_c10/flp0/550    | R01_cb13478_c10/flp0/550    | R01_cb13478_c10/flp0/550     |
| R01_cb8209_c2/flp0/2365      | NA                          | NA                          | NA                          | R01_cb8209_c2/flp0/2365      |
| R01_cb17044_c17/flp0/1494    | NA                          | R01_cb17044_c17/flp0/1494   | NA                          | NA                           |
| R01_cb8564_c106631/f6p1/2246 | NA                          | NA                          | NA                          | R01_cb8564_c106631/f6p1/2246 |
| R01_cb5686_c11/flp0/2454     | NA                          | R01_cb5686_c11/flp0/2454    | NA                          | NA                           |
| R01_cb10029_c1336/flp1/812   | NA                          | R01_cb10029_c1336/flp1/812  | NA                          | NA                           |
| R01_cb16870_c0/f2p0/747      | NA                          | NA                          | R01_cb16870_c0/f2p0/747     | R01_cb16870_c0/f2p0/747      |
| R01_cb17582_c0/flp0/650      | R01_cb17582_c0/flp0/650     | R01_cb17582_c0/flp0/650     | NA                          | R01_cb17582_c0/flp0/650      |
| R01_cb9325_c2/flp0/464       | R01_cb9325_c2/flp0/464      | R01_cb9325_c2/flp0/464      | R01_cb9325_c2/flp0/464      | R01_cb9325_c2/flp0/464       |
| R01_cb3752_c1/f2p0/1494      | NA                          | NA                          | NA                          | R01_cb3752_c1/f2p0/1494      |
| R01_cb822_c8/f2p0/4181       | NA                          | NA                          | NA                          | R01_cb822_c8/f2p0/4181       |
| R01_cb8564_c118441/flp0/2931 | NA                          | NA                          | NA                          | R01_cb8564_c118441/flp0/2931 |
| R01_cb2875_c10/flp0/4041     | NA                          | NA                          | NA                          | R01_cb2875_c10/flp0/4041     |
| R01_cb8564_c23778/flp0/1942  | R01_cb8564_c23778/flp0/1942 | R01_cb8564_c23778/flp0/1942 | R01_cb8564_c23778/flp0/1942 | R01_cb8564_c23778/flp0/1942  |
| R01_cb3307_c26/flp2/2430     | NA                          | NA                          | NA                          | R01_cb3307_c26/flp2/2430     |

|                              |                             |                             |                             |                              |
|------------------------------|-----------------------------|-----------------------------|-----------------------------|------------------------------|
| R01_cb8564_c4096/flp0/2104   | R01_cb8564_c4096/flp0/2104  | R01_cb8564_c4096/flp0/2104  | R01_cb8564_c4096/flp0/2104  | R01_cb8564_c4096/flp0/2104   |
| R01_cb3615_c2/flp0/3065      | NA                          | R01_cb3615_c2/flp0/3065     | NA                          | NA                           |
| R01_cb13985_c7/flp0/537      | NA                          | R01_cb13985_c7/flp0/537     | NA                          | NA                           |
| R01_cb16515_c1/flp0/841      | NA                          | NA                          | NA                          | R01_cb16515_c1/flp0/841      |
| R01_cb9003_c6/flp0/1295      | R01_cb9003_c6/flp0/1295     | R01_cb9003_c6/flp0/1295     | R01_cb9003_c6/flp0/1295     | R01_cb9003_c6/flp0/1295      |
| R01_cb11353_c3/flp0/890      | NA                          | NA                          | NA                          | R01_cb11353_c3/flp0/890      |
| R01_cb6598_c8/flp0/1987      | NA                          | R01_cb6598_c8/flp0/1987     | NA                          | NA                           |
| R01_cb676_c6/flp0/3136       | NA                          | NA                          | NA                          | R01_cb676_c6/flp0/3136       |
| R01_cb8564_c91448/flp0/2758  | NA                          | R01_cb8564_c91448/flp0/2758 | R01_cb8564_c91448/flp0/2758 | R01_cb8564_c91448/flp0/2758  |
| R01_cb10015_c225/flp2/870    | R01_cb10015_c225/flp2/870   | R01_cb10015_c225/flp2/870   | NA                          | R01_cb10015_c225/flp2/870    |
| R01_cb18456_c5283/flp0/639   | R01_cb18456_c5283/flp0/639  | R01_cb18456_c5283/flp0/639  | NA                          | R01_cb18456_c5283/flp0/639   |
| R01_cb15581_c2/flp0/865      | NA                          | NA                          | NA                          | R01_cb15581_c2/flp0/865      |
| R01_cb9333_c1/flp0/3393      | R01_cb9333_c1/flp0/3393     | R01_cb9333_c1/flp0/3393     | R01_cb9333_c1/flp0/3393     | R01_cb9333_c1/flp0/3393      |
| R01_cb10337_c3/flp2/1673     | NA                          | R01_cb10337_c3/flp2/1673    | NA                          | NA                           |
| R01_cb8564_c130109/flp0/3052 | NA                          | NA                          | NA                          | R01_cb8564_c130109/flp0/3052 |
| R01_cb16180_c0/f2p0/603      | R01_cb16180_c0/f2p0/603     | R01_cb16180_c0/f2p0/603     | R01_cb16180_c0/f2p0/603     | R01_cb16180_c0/f2p0/603      |
| R01_cb8564_c40634/flp0/2728  | R01_cb8564_c40634/flp0/2728 | R01_cb8564_c40634/flp0/2728 | R01_cb8564_c40634/flp0/2728 | R01_cb8564_c40634/flp0/2728  |
| R01_cb9797_c126/flp0/1106    | NA                          | R01_cb9797_c126/flp0/1106   | NA                          | NA                           |
| R01_cb12024_c12/flp0/997     | NA                          | NA                          | NA                          | R01_cb12024_c12/flp0/997     |
| R01_cb11900_c2/f2p0/654      | NA                          | R01_cb11900_c2/f2p0/654     | NA                          | R01_cb11900_c2/f2p0/654      |
| R01_cb13284_c7/flp0/1818     | NA                          | NA                          | NA                          | R01_cb13284_c7/flp0/1818     |
| R01_cb13851_c1/flp0/1070     | NA                          | R01_cb13851_c1/flp0/1070    | NA                          | NA                           |
| R01_cb13867_c19/f4p3/761     | NA                          | NA                          | NA                          | R01_cb13867_c19/f4p3/761     |
| R01_cb16125_c18/flp0/1753    | NA                          | NA                          | NA                          | R01_cb16125_c18/flp0/1753    |



|                             |                         |                             |                             |                             |
|-----------------------------|-------------------------|-----------------------------|-----------------------------|-----------------------------|
| R01_cb7797_c8/f1p1/2476     | NA                      | R01_cb7797_c8/f1p1/2476     | NA                          | R01_cb7797_c8/f1p1/2476     |
| R01_cb11925_c14/f1p1/1775   | NA                      | NA                          | NA                          | R01_cb11925_c14/f1p1/1775   |
| R01_cb11757_c1/f1p0/3799    | NA                      | R01_cb11757_c1/f1p0/3799    | R01_cb11757_c1/f1p0/3799    | NA                          |
| R01_cb4094_c27/f1p0/537     | R01_cb4094_c27/f1p0/537 | R01_cb4094_c27/f1p0/537     | NA                          | NA                          |
| R01_cb3774_c73/f3p0/1972    | NA                      | NA                          | NA                          | R01_cb3774_c73/f3p0/1972    |
| R01_cb2400_c0/f1p0/3947     | NA                      | R01_cb2400_c0/f1p0/3947     | NA                          | NA                          |
| R01_cb6615_c9/f1p0/2575     | NA                      | NA                          | NA                          | R01_cb6615_c9/f1p0/2575     |
| R01_cb3088_c6/f1p0/2002     | R01_cb3088_c6/f1p0/2002 | NA                          | NA                          | NA                          |
| R01_cb3958_c6/f1p0/2932     | NA                      | R01_cb3958_c6/f1p0/2932     | NA                          | NA                          |
| R01_cb9529_c0/f3p0/1045     | NA                      | R01_cb9529_c0/f3p0/1045     | NA                          | R01_cb9529_c0/f3p0/1045     |
| R01_cb10725_c0/f1p0/1057    | NA                      | R01_cb10725_c0/f1p0/1057    | R01_cb10725_c0/f1p0/1057    | R01_cb10725_c0/f1p0/1057    |
| R01_cb8084_c6/f1p0/1314     | NA                      | NA                          | NA                          | R01_cb8084_c6/f1p0/1314     |
| R01_cb4642_c8/f1p0/2139     | NA                      | NA                          | NA                          | R01_cb4642_c8/f1p0/2139     |
| R01_cb15295_c1/f1p0/1661    | NA                      | NA                          | NA                          | R01_cb15295_c1/f1p0/1661    |
| R01_cb8564_c19945/f1p0/3208 | NA                      | R01_cb8564_c19945/f1p0/3208 | R01_cb8564_c19945/f1p0/3208 | R01_cb8564_c19945/f1p0/3208 |
| R01_cb12943_c3/f1p0/1547    | NA                      | NA                          | NA                          | R01_cb12943_c3/f1p0/1547    |
| R01_cb8564_c1044/f1p0/3621  | NA                      | R01_cb8564_c1044/f1p0/3621  | NA                          | R01_cb8564_c1044/f1p0/3621  |
| R01_cb27_c10/f1p0/1363      | NA                      | NA                          | NA                          | R01_cb27_c10/f1p0/1363      |
| R01_cb8564_c70156/f1p0/2250 | NA                      | R01_cb8564_c70156/f1p0/2250 | NA                          | NA                          |
| R01_cb8564_c117381/f1p0/232 | NA                      | R01_cb8564_c117381/f1p0/232 | NA                          | R01_cb8564_c117381/f1p0/232 |
| 7                           |                         | 7                           |                             | 7                           |
| R01_cb7329_c4/f1p0/1247     | NA                      | R01_cb7329_c4/f1p0/1247     | NA                          | NA                          |
| R01_cb2804_c140/f1p0/2219   | NA                      | R01_cb2804_c140/f1p0/2219   | R01_cb2804_c140/f1p0/2219   | R01_cb2804_c140/f1p0/2219   |
| R01_cb10764_c5/f1p0/3530    | NA                      | R01_cb10764_c5/f1p0/3530    | NA                          | NA                          |
| R01_cb4022_c37/f1p0/1559    | NA                      | NA                          | NA                          | R01_cb4022_c37/f1p0/1559    |
| R01_cb8981_c0/f4p1/2043     | NA                      | NA                          | NA                          | R01_cb8981_c0/f4p1/2043     |

|                             |                         |                             |                             |                             |
|-----------------------------|-------------------------|-----------------------------|-----------------------------|-----------------------------|
| R01_cb6093_c2/f2p0/405      | R01_cb6093_c2/f2p0/405  | R01_cb6093_c2/f2p0/405      | R01_cb6093_c2/f2p0/405      | R01_cb6093_c2/f2p0/405      |
| R01_cb9485_c2/f1p0/2076     | NA                      | R01_cb9485_c2/f1p0/2076     | NA                          | R01_cb9485_c2/f1p0/2076     |
| R01_cb8279_c14/f1p0/1924    | NA                      | NA                          | NA                          | R01_cb8279_c14/f1p0/1924    |
| R01_cb6391_c11/f1p0/2658    | NA                      | R01_cb6391_c11/f1p0/2658    | NA                          | NA                          |
| R01_cb2927_c17/f1p0/2828    | NA                      | R01_cb2927_c17/f1p0/2828    | NA                          | NA                          |
| R01_cb5846_c42/f1p0/1948    | NA                      | R01_cb5846_c42/f1p0/1948    | NA                          | NA                          |
| R01_cb18620_c9/f1p0/1806    | NA                      | NA                          | NA                          | R01_cb18620_c9/f1p0/1806    |
| R01_cb17986_c2/f1p0/329     | R01_cb17986_c2/f1p0/329 | R01_cb17986_c2/f1p0/329     | NA                          | R01_cb17986_c2/f1p0/329     |
| R01_cb16913_c3/f2p0/572     | NA                      | R01_cb16913_c3/f2p0/572     | NA                          | NA                          |
| R01_cb10174_c2/f1p1/2740    | NA                      | NA                          | R01_cb10174_c2/f1p1/2740    | NA                          |
| R01_cb6456_c4/f1p0/2268     | NA                      | R01_cb6456_c4/f1p0/2268     | NA                          | R01_cb6456_c4/f1p0/2268     |
| R01_cb13161_c7/f1p0/1043    | NA                      | R01_cb13161_c7/f1p0/1043    | NA                          | NA                          |
| R01_cb8564_c14928/f1p0/2382 | NA                      | NA                          | NA                          | R01_cb8564_c14928/f1p0/2382 |
| R01_cb14246_c0/f1p0/538     | NA                      | R01_cb14246_c0/f1p0/538     | R01_cb14246_c0/f1p0/538     | NA                          |
| R01_cb13724_c8/f1p0/454     | NA                      | NA                          | R01_cb13724_c8/f1p0/454     | R01_cb13724_c8/f1p0/454     |
| R01_cb6213_c11/f1p0/2855    | NA                      | R01_cb6213_c11/f1p0/2855    | NA                          | NA                          |
| R01_cb16520_c3/f1p0/1138    | NA                      | NA                          | NA                          | R01_cb16520_c3/f1p0/1138    |
| R01_cb18516_c0/f3p0/794     | R01_cb18516_c0/f3p0/794 | R01_cb18516_c0/f3p0/794     | R01_cb18516_c0/f3p0/794     | R01_cb18516_c0/f3p0/794     |
| R01_cb13414_c1/f1p0/1601    | NA                      | R01_cb13414_c1/f1p0/1601    | NA                          | NA                          |
| R01_cb5911_c5/f1p0/1846     | NA                      | NA                          | NA                          | R01_cb5911_c5/f1p0/1846     |
| R01_cb13586_c9/f1p2/913     | NA                      | R01_cb13586_c9/f1p2/913     | NA                          | NA                          |
| R01_cb10029_c1416/f1p2/809  | NA                      | R01_cb10029_c1416/f1p2/809  | NA                          | NA                          |
| R01_cb8564_c14100/f1p0/4985 | NA                      | R01_cb8564_c14100/f1p0/4985 | R01_cb8564_c14100/f1p0/4985 | R01_cb8564_c14100/f1p0/4985 |
| R01_cb2959_c7/f1p0/3484     | NA                      | NA                          | NA                          | R01_cb2959_c7/f1p0/3484     |
| R01_cb14946_c2/f1p0/886     | R01_cb14946_c2/f1p0/886 | R01_cb14946_c2/f1p0/886     | NA                          | NA                          |
| R01_cb15008_c2/f1p0/1322    | NA                      | R01_cb15008_c2/f1p0/1322    | NA                          | NA                          |

|                                  |                         |                                  |                             |                             |
|----------------------------------|-------------------------|----------------------------------|-----------------------------|-----------------------------|
| R01_cb8564_c25496/f2p0/2331      | NA                      | R01_cb8564_c25496/f2p0/2331      | R01_cb8564_c25496/f2p0/2331 | R01_cb8564_c25496/f2p0/2331 |
| R01_cb14556_c0/f6p0/1020         | NA                      | NA                               | NA                          | R01_cb14556_c0/f6p0/1020    |
| R01_cb13405_c2/f1p0/668          | NA                      | R01_cb13405_c2/f1p0/668          | R01_cb13405_c2/f1p0/668     | R01_cb13405_c2/f1p0/668     |
| R01_cb16310_c1/f1p0/1091         | NA                      | R01_cb16310_c1/f1p0/1091         | NA                          | NA                          |
| R01_cb17163_c1/f1p0/1082         | NA                      | R01_cb17163_c1/f1p0/1082         | R01_cb17163_c1/f1p0/1082    | R01_cb17163_c1/f1p0/1082    |
| R01_cb5331_c2/f1p0/694           | R01_cb5331_c2/f1p0/694  | R01_cb5331_c2/f1p0/694           | R01_cb5331_c2/f1p0/694      | R01_cb5331_c2/f1p0/694      |
| R01_cb3637_c3/f1p0/1502          | NA                      | R01_cb3637_c3/f1p0/1502          | NA                          | NA                          |
| R01_cb8564_c126614/f1p0/464<br>6 | NA                      | R01_cb8564_c126614/f1p0/464<br>6 | NA                          | NA                          |
| R01_cb17094_c0/f1p0/422          | R01_cb17094_c0/f1p0/422 | R01_cb17094_c0/f1p0/422          | R01_cb17094_c0/f1p0/422     | R01_cb17094_c0/f1p0/422     |
| R01_cb14415_c1/f1p0/989          | NA                      | NA                               | NA                          | R01_cb14415_c1/f1p0/989     |
| R01_cb17604_c7/f1p0/566          | NA                      | R01_cb17604_c7/f1p0/566          | R01_cb17604_c7/f1p0/566     | R01_cb17604_c7/f1p0/566     |
| R01_cb2082_c19/f1p0/2908         | NA                      | NA                               | NA                          | R01_cb2082_c19/f1p0/2908    |
| R01_cb3575_c6/f1p1/3530          | NA                      | NA                               | NA                          | R01_cb3575_c6/f1p1/3530     |
| R01_cb2219_c9/f1p0/2783          | NA                      | NA                               | NA                          | R01_cb2219_c9/f1p0/2783     |
| R01_cb5875_c0/f1p0/2992          | R01_cb5875_c0/f1p0/2992 | R01_cb5875_c0/f1p0/2992          | R01_cb5875_c0/f1p0/2992     | R01_cb5875_c0/f1p0/2992     |
| R01_cb17735_c1/f2p0/772          | NA                      | R01_cb17735_c1/f2p0/772          | NA                          | NA                          |
| R01_cb4347_c2/f2p0/3350          | NA                      | NA                               | R01_cb4347_c2/f2p0/3350     | NA                          |
| R01_cb446_c68/f1p0/780           | NA                      | R01_cb446_c68/f1p0/780           | NA                          | R01_cb446_c68/f1p0/780      |
| R01_cb18037_c0/f2p0/568          | NA                      | R01_cb18037_c0/f2p0/568          | R01_cb18037_c0/f2p0/568     | R01_cb18037_c0/f2p0/568     |
| R01_cb12767_c3/f4p1/1063         | NA                      | NA                               | NA                          | R01_cb12767_c3/f4p1/1063    |
| R01_cb17417_c4/f1p0/344          | R01_cb17417_c4/f1p0/344 | R01_cb17417_c4/f1p0/344          | R01_cb17417_c4/f1p0/344     | R01_cb17417_c4/f1p0/344     |
| R01_cb15953_c0/f2p0/968          | NA                      | NA                               | NA                          | R01_cb15953_c0/f2p0/968     |
| R01_cb17069_c0/f1p0/1095         | NA                      | R01_cb17069_c0/f1p0/1095         | R01_cb17069_c0/f1p0/1095    | R01_cb17069_c0/f1p0/1095    |
| R01_cb2761_c8/f1p0/2922          | R01_cb2761_c8/f1p0/2922 | R01_cb2761_c8/f1p0/2922          | NA                          | R01_cb2761_c8/f1p0/2922     |
| R01_cb18222_c2/f1p0/448          | NA                      | NA                               | NA                          | R01_cb18222_c2/f1p0/448     |

|                                  |                                  |                                  |                                  |                                  |
|----------------------------------|----------------------------------|----------------------------------|----------------------------------|----------------------------------|
| R01_cb8564_c119485/f1p0/210<br>4 | NA                               | R01_cb8564_c119485/f1p0/210<br>4 | R01_cb8564_c119485/f1p0/210<br>4 | R01_cb8564_c119485/f1p0/210<br>4 |
| R01_cb2844_c0/f1p0/3791          | NA                               | R01_cb2844_c0/f1p0/3791          | NA                               | NA                               |
| R01_cb13220_c1/f2p0/1812         | NA                               | NA                               | NA                               | R01_cb13220_c1/f2p0/1812         |
| R01_cb8564_c37376/f1p0/2325      | R01_cb8564_c37376/f1p0/2325<br>5 | R01_cb8564_c37376/f1p0/2325      | R01_cb8564_c37376/f1p0/2325      | R01_cb8564_c37376/f1p0/2325      |
| R01_cb11483_c1/f1p0/2628         | NA                               | NA                               | NA                               | R01_cb11483_c1/f1p0/2628         |
| R01_cb8564_c19747/f1p0/2788      | NA                               | R01_cb8564_c19747/f1p0/2788      | R01_cb8564_c19747/f1p0/2788      | R01_cb8564_c19747/f1p0/2788      |
| R01_cb8564_c34349/f1p0/3514      | NA                               | R01_cb8564_c34349/f1p0/3514      | R01_cb8564_c34349/f1p0/3514      | R01_cb8564_c34349/f1p0/3514      |
| R01_cb17532_c3/f1p1/5304         | NA                               | NA                               | NA                               | R01_cb17532_c3/f1p1/5304         |
| R01_cb8564_c111376/f1p0/398<br>4 | NA                               | NA                               | NA                               | R01_cb8564_c111376/f1p0/398<br>4 |
| R01_cb8564_c115478/f1p0/293<br>8 | NA                               | R01_cb8564_c115478/f1p0/293<br>8 | R01_cb8564_c115478/f1p0/293<br>8 | R01_cb8564_c115478/f1p0/293<br>8 |
| R01_cb17269_c1/f2p0/514          | NA                               | R01_cb17269_c1/f2p0/514          | R01_cb17269_c1/f2p0/514          | R01_cb17269_c1/f2p0/514          |
| R01_cb3965_c5/f1p1/3316          | NA                               | R01_cb3965_c5/f1p1/3316          | NA                               | NA                               |
| R01_cb5896_c164/f1p0/1895        | R01_cb5896_c164/f1p0/1895        | R01_cb5896_c164/f1p0/1895        | R01_cb5896_c164/f1p0/1895        | R01_cb5896_c164/f1p0/1895        |
| R01_cb5229_c12/f14p1/1035        | NA                               | NA                               | NA                               | R01_cb5229_c12/f14p1/1035        |
| R01_cb1437_c1/f2p0/4008          | NA                               | NA                               | NA                               | R01_cb1437_c1/f2p0/4008          |
| R01_cb3500_c20/f1p0/2574         | NA                               | NA                               | NA                               | R01_cb3500_c20/f1p0/2574         |
| R01_cb13517_c0/f1p0/961          | R01_cb13517_c0/f1p0/961          | NA                               | NA                               | NA                               |
| R01_cb2101_c6/f1p0/2473          | R01_cb2101_c6/f1p0/2473          | R01_cb2101_c6/f1p0/2473          | NA                               | NA                               |
| R01_cb8564_c3800/f1p0/2113       | NA                               | R01_cb8564_c3800/f1p0/2113       | R01_cb8564_c3800/f1p0/2113       | NA                               |
| R01_cb8564_c3171/f1p1/2490       | NA                               | R01_cb8564_c3171/f1p1/2490       | NA                               | NA                               |
| R01_cb5208_c3/f1p0/3163          | NA                               | NA                               | NA                               | R01_cb5208_c3/f1p0/3163          |
| R01_cb10693_c0/f2p1/1742         | NA                               | NA                               | NA                               | R01_cb10693_c0/f2p1/1742         |

|                             |                             |                             |                             |                             |
|-----------------------------|-----------------------------|-----------------------------|-----------------------------|-----------------------------|
| R01_cb15913_c3/flp0/526     | R01_cb15913_c3/flp0/526     | R01_cb15913_c3/flp0/526     | R01_cb15913_c3/flp0/526     | R01_cb15913_c3/flp0/526     |
| R01_cb8564_c75559/flp0/2086 | NA                          | R01_cb8564_c75559/flp0/2086 | NA                          | R01_cb8564_c75559/flp0/2086 |
| R01_cb11569_c0/flp0/1142    | R01_cb11569_c0/flp0/1142    | R01_cb11569_c0/flp0/1142    | R01_cb11569_c0/flp0/1142    | R01_cb11569_c0/flp0/1142    |
| R01_cb17052_c1/flp0/1426    | NA                          | NA                          | NA                          | R01_cb17052_c1/flp0/1426    |
| R01_cb1849_c13/flp1/1986    | NA                          | NA                          | NA                          | R01_cb1849_c13/flp1/1986    |
| R01_cb1441_c26/flp0/6400    | NA                          | R01_cb1441_c26/flp0/6400    | NA                          | NA                          |
| R01_cb8564_c48239/flp0/2761 | NA                          | R01_cb8564_c48239/flp0/2761 | R01_cb8564_c48239/flp0/2761 | R01_cb8564_c48239/flp0/2761 |
| R01_cb781_c33/flp0/1887     | NA                          | NA                          | NA                          | R01_cb781_c33/flp0/1887     |
| R01_cb8564_c122775/flp0/229 | R01_cb8564_c122775/flp0/229 | NA                          | R01_cb8564_c122775/flp0/229 | NA                          |
| 1                           | 91                          |                             | 1                           |                             |
| R01_cb8564_c81433/flp0/3330 | NA                          | NA                          | NA                          | R01_cb8564_c81433/flp0/3330 |
| R01_cb27_c2/f2p0/1166       | NA                          | NA                          | NA                          | R01_cb27_c2/f2p0/1166       |
| R01_cb16145_c2/flp0/631     | NA                          | R01_cb16145_c2/flp0/631     | R01_cb16145_c2/flp0/631     | NA                          |
| R01_cb8564_c85367/flp0/1928 | NA                          | R01_cb8564_c85367/flp0/1928 | R01_cb8564_c85367/flp0/1928 | R01_cb8564_c85367/flp0/1928 |
| R01_cb18711_c1/flp0/988     | NA                          | R01_cb18711_c1/flp0/988     | NA                          | R01_cb18711_c1/flp0/988     |
| R01_cb13535_c12/flp0/1513   | NA                          | R01_cb13535_c12/flp0/1513   | NA                          | NA                          |
| R01_cb8564_c2999/flp0/2399  | NA                          | NA                          | NA                          | R01_cb8564_c2999/flp0/2399  |
| R01_cb5657_c4/flp0/2282     | NA                          | NA                          | NA                          | R01_cb5657_c4/flp0/2282     |
| R01_cb18660_c0/flp0/5189    | NA                          | R01_cb18660_c0/flp0/5189    | R01_cb18660_c0/flp0/5189    | R01_cb18660_c0/flp0/5189    |
| R01_cb10875_c2/flp0/1565    | NA                          | R01_cb10875_c2/flp0/1565    | NA                          | NA                          |
| R01_cb10343_c1/flp0/2337    | NA                          | R01_cb10343_c1/flp0/2337    | NA                          | NA                          |
| R01_cb17090_c1/flp0/1081    | NA                          | NA                          | NA                          | R01_cb17090_c1/flp0/1081    |
| R01_cb18392_c1/flp0/993     | NA                          | NA                          | NA                          | R01_cb18392_c1/flp0/993     |
| R01_cb8564_c115131/flp0/220 | NA                          | R01_cb8564_c115131/flp0/220 | NA                          | R01_cb8564_c115131/flp0/220 |
| 5                           |                             | 5                           |                             | 5                           |
| R01_cb8564_c19993/flp0/2447 | NA                          | R01_cb8564_c19993/flp0/2447 | NA                          | NA                          |

|                             |                          |                             |                             |                             |
|-----------------------------|--------------------------|-----------------------------|-----------------------------|-----------------------------|
| R01_cb16191_c2/flp1/1836    | NA                       | NA                          | NA                          | R01_cb16191_c2/flp1/1836    |
| R01_cb2494_c14/flp0/921     | R01_cb2494_c14/flp0/921  | R01_cb2494_c14/flp0/921     | R01_cb2494_c14/flp0/921     | R01_cb2494_c14/flp0/921     |
| R01_cb14886_c2/flp0/664     | NA                       | NA                          | R01_cb14886_c2/flp0/664     | NA                          |
| R01_cb3500_c31/flp2/3490    | NA                       | NA                          | NA                          | R01_cb3500_c31/flp2/3490    |
| R01_cb2875_c14/flp1/3543    | NA                       | NA                          | NA                          | R01_cb2875_c14/flp1/3543    |
| R01_cb11250_c2/flp0/1467    | R01_cb11250_c2/flp0/1467 | R01_cb11250_c2/flp0/1467    | R01_cb11250_c2/flp0/1467    | R01_cb11250_c2/flp0/1467    |
| R01_cb3929_c4/flp0/3486     | NA                       | R01_cb3929_c4/flp0/3486     | NA                          | NA                          |
| R01_cb15217_c7/flp0/484     | R01_cb15217_c7/flp0/484  | R01_cb15217_c7/flp0/484     | R01_cb15217_c7/flp0/484     | R01_cb15217_c7/flp0/484     |
| R01_cb1418_c3/flp0/3102     | NA                       | NA                          | NA                          | R01_cb1418_c3/flp0/3102     |
| R01_cb5369_c4/flp0/3113     | NA                       | R01_cb5369_c4/flp0/3113     | NA                          | NA                          |
| R01_cb4861_c1/flp0/2323     | NA                       | R01_cb4861_c1/flp0/2323     | NA                          | NA                          |
| R01_cb8564_c72769/flp0/4973 | NA                       | NA                          | NA                          | R01_cb8564_c72769/flp0/4973 |
| R01_cb8700_c27/flp0/1925    | NA                       | R01_cb8700_c27/flp0/1925    | NA                          | NA                          |
| R01_cb11603_c1/flp0/1913    | NA                       | R01_cb11603_c1/flp0/1913    | NA                          | NA                          |
| R01_cb9653_c10/flp0/510     | R01_cb9653_c10/flp0/510  | R01_cb9653_c10/flp0/510     | R01_cb9653_c10/flp0/510     | R01_cb9653_c10/flp0/510     |
| R01_cb17084_c0/f2p0/622     | R01_cb17084_c0/f2p0/622  | R01_cb17084_c0/f2p0/622     | NA                          | NA                          |
| R01_cb15312_c3/flp0/987     | NA                       | NA                          | R01_cb15312_c3/flp0/987     | R01_cb15312_c3/flp0/987     |
| R01_cb15814_c6/f2p1/1323    | NA                       | NA                          | NA                          | R01_cb15814_c6/f2p1/1323    |
| R01_cb10480_c40/flp0/383    | R01_cb10480_c40/flp0/383 | R01_cb10480_c40/flp0/383    | NA                          | R01_cb10480_c40/flp0/383    |
| R01_cb5373_c3/flp0/3042     | NA                       | NA                          | NA                          | R01_cb5373_c3/flp0/3042     |
| R01_cb14560_c9/flp0/1215    | NA                       | R01_cb14560_c9/flp0/1215    | NA                          | R01_cb14560_c9/flp0/1215    |
| R01_cb11411_c0/flp0/1838    | NA                       | R01_cb11411_c0/flp0/1838    | R01_cb11411_c0/flp0/1838    | R01_cb11411_c0/flp0/1838    |
| R01_cb8564_c119824/flp0/249 | NA                       | R01_cb8564_c119824/flp0/249 | R01_cb8564_c119824/flp0/249 | R01_cb8564_c119824/flp0/249 |
| 1                           | NA                       | 1                           | 1                           | 1                           |
| R01_cb15811_c36/flp1/632    | NA                       | R01_cb15811_c36/flp1/632    | NA                          | R01_cb15811_c36/flp1/632    |
| R01_cb8564_c91577/flp0/2925 | NA                       | R01_cb8564_c91577/flp0/2925 | NA                          | NA                          |

|                             |                             |                             |                             |                             |
|-----------------------------|-----------------------------|-----------------------------|-----------------------------|-----------------------------|
| R01_cb843_c5/flp0/2329      | NA                          | NA                          | NA                          | R01_cb843_c5/flp0/2329      |
| R01_cb4917_c1/flp0/2292     | NA                          | NA                          | NA                          | R01_cb4917_c1/flp0/2292     |
| R01_cb15950_c0/f2p1/1402    | NA                          | NA                          | NA                          | R01_cb15950_c0/f2p1/1402    |
| R01_cb8564_c78234/flp0/2871 | NA                          | R01_cb8564_c78234/flp0/2871 | NA                          | R01_cb8564_c78234/flp0/2871 |
| R01_cb9272_c1/f2p0/637      | NA                          | R01_cb9272_c1/f2p0/637      | R01_cb9272_c1/f2p0/637      | R01_cb9272_c1/f2p0/637      |
| R01_cb10653_c4/flp0/786     | R01_cb10653_c4/flp0/786     | R01_cb10653_c4/flp0/786     | NA                          | NA                          |
| R01_cb8564_c1411/flp0/2310  | NA                          | R01_cb8564_c1411/flp0/2310  | NA                          | R01_cb8564_c1411/flp0/2310  |
| R01_cb8564_c86066/f2p0/2719 | NA                          | R01_cb8564_c86066/f2p0/2719 | R01_cb8564_c86066/f2p0/2719 | NA                          |
| R01_cb14533_c3/flp0/1017    | NA                          | NA                          | R01_cb14533_c3/flp0/1017    | R01_cb14533_c3/flp0/1017    |
| R01_cb8030_c2/flp0/2357     | NA                          | NA                          | NA                          | R01_cb8030_c2/flp0/2357     |
| R01_cb8840_c4/flp0/802      | NA                          | R01_cb8840_c4/flp0/802      | NA                          | NA                          |
| R01_cb14660_c6/flp0/565     | R01_cb14660_c6/flp0/565     | R01_cb14660_c6/flp0/565     | NA                          | NA                          |
| R01_cb14853_c1/flp0/668     | R01_cb14853_c1/flp0/668     | R01_cb14853_c1/flp0/668     | R01_cb14853_c1/flp0/668     | R01_cb14853_c1/flp0/668     |
| R01_cb14119_c2/flp0/654     | NA                          | R01_cb14119_c2/flp0/654     | NA                          | NA                          |
| R01_cb17236_c4/flp0/791     | R01_cb17236_c4/flp0/791     | R01_cb17236_c4/flp0/791     | R01_cb17236_c4/flp0/791     | R01_cb17236_c4/flp0/791     |
| R01_cb4805_c28/flp0/752     | NA                          | R01_cb4805_c28/flp0/752     | NA                          | R01_cb4805_c28/flp0/752     |
| R01_cb10913_c2/flp0/2117    | NA                          | R01_cb10913_c2/flp0/2117    | NA                          | R01_cb10913_c2/flp0/2117    |
| R01_cb9154_c13/flp0/1300    | NA                          | NA                          | NA                          | R01_cb9154_c13/flp0/1300    |
| R01_cb8564_c85104/flp0/2266 | NA                          | R01_cb8564_c85104/flp0/2266 | R01_cb8564_c85104/flp0/2266 | R01_cb8564_c85104/flp0/2266 |
| R01_cb11744_c0/flp0/1872    | NA                          | NA                          | NA                          | R01_cb11744_c0/flp0/1872    |
| R01_cb12045_c3/flp0/1491    | NA                          | NA                          | NA                          | R01_cb12045_c3/flp0/1491    |
| R01_cb15818_c2/flp0/1426    | NA                          | NA                          | NA                          | R01_cb15818_c2/flp0/1426    |
| R01_cb8564_c123397/flp0/413 | NA                          | NA                          | NA                          | R01_cb8564_c123397/flp0/413 |
| 8                           |                             |                             |                             | 8                           |
| R01_cb13178_c24/flp0/610    | R01_cb13178_c24/flp0/610    | R01_cb13178_c24/flp0/610    | NA                          | NA                          |
| R01_cb8564_c114792/flp0/280 | R01_cb8564_c114792/flp0/280 | R01_cb8564_c114792/flp0/280 | R01_cb8564_c114792/flp0/280 | R01_cb8564_c114792/flp0/280 |

|                             |                         |                           |                         |                             |
|-----------------------------|-------------------------|---------------------------|-------------------------|-----------------------------|
| 9                           | 09                      | 9                         | 9                       | 9                           |
| R01_cb12402_c3/f3p1/631     | NA                      | NA                        | R01_cb12402_c3/f3p1/631 | R01_cb12402_c3/f3p1/631     |
| R01_cb13901_c4/f1p0/1146    | NA                      | R01_cb13901_c4/f1p0/1146  | NA                      | NA                          |
| R01_cb3888_c1/f2p0/2314     | NA                      | R01_cb3888_c1/f2p0/2314   | NA                      | NA                          |
| R01_cb4768_c18/f1p1/2680    | NA                      | R01_cb4768_c18/f1p1/2680  | NA                      | NA                          |
| R01_cb8564_c85607/f1p0/2557 | NA                      | NA                        | NA                      | R01_cb8564_c85607/f1p0/2557 |
| R01_cb11332_c1/f1p0/2388    | NA                      | R01_cb11332_c1/f1p0/2388  | NA                      | NA                          |
| R01_cb7219_c6/f1p3/2633     | NA                      | NA                        | NA                      | R01_cb7219_c6/f1p3/2633     |
| R01_cb16899_c1/f1p0/659     | NA                      | R01_cb16899_c1/f1p0/659   | NA                      | NA                          |
| R01_cb10024_c691/f4p0/549   | NA                      | R01_cb10024_c691/f4p0/549 | NA                      | NA                          |
| R01_cb15428_c2/f1p0/759     | NA                      | NA                        | R01_cb15428_c2/f1p0/759 | R01_cb15428_c2/f1p0/759     |
| R01_cb5297_c1/f1p1/3694     | NA                      | R01_cb5297_c1/f1p1/3694   | NA                      | NA                          |
| R01_cb8564_c23847/f1p0/2186 | NA                      | NA                        | NA                      | R01_cb8564_c23847/f1p0/2186 |
| R01_cb13026_c3/f1p0/997     | R01_cb13026_c3/f1p0/997 | R01_cb13026_c3/f1p0/997   | R01_cb13026_c3/f1p0/997 | R01_cb13026_c3/f1p0/997     |
| R01_cb10799_c1/f1p1/1466    | NA                      | NA                        | NA                      | R01_cb10799_c1/f1p1/1466    |
| R01_cb3498_c5/f2p0/1067     | NA                      | R01_cb3498_c5/f2p0/1067   | NA                      | NA                          |
| R01_cb15932_c0/f3p0/1233    | NA                      | NA                        | NA                      | R01_cb15932_c0/f3p0/1233    |
| R01_cb8786_c3/f1p0/2187     | NA                      | NA                        | NA                      | R01_cb8786_c3/f1p0/2187     |
| R01_cb6113_c2/f2p0/1143     | NA                      | NA                        | NA                      | R01_cb6113_c2/f2p0/1143     |
| R01_cb2708_c42/f1p2/1291    | NA                      | R01_cb2708_c42/f1p2/1291  | NA                      | NA                          |
| R01_cb6845_c10/f1p0/2755    | NA                      | NA                        | NA                      | R01_cb6845_c10/f1p0/2755    |
| R01_cb11926_c1/f1p0/622     | R01_cb11926_c1/f1p0/622 | R01_cb11926_c1/f1p0/622   | R01_cb11926_c1/f1p0/622 | R01_cb11926_c1/f1p0/622     |
| R01_cb10843_c7/f1p0/627     | R01_cb10843_c7/f1p0/627 | R01_cb10843_c7/f1p0/627   | R01_cb10843_c7/f1p0/627 | R01_cb10843_c7/f1p0/627     |
| R01_cb15069_c1/f3p0/552     | NA                      | R01_cb15069_c1/f3p0/552   | NA                      | NA                          |
| R01_cb4639_c5/f1p0/2925     | NA                      | NA                        | NA                      | R01_cb4639_c5/f1p0/2925     |
| R01_cb2482_c50/f1p0/1645    | NA                      | NA                        | NA                      | R01_cb2482_c50/f1p0/1645    |



|                              |                             |                              |                             |                              |
|------------------------------|-----------------------------|------------------------------|-----------------------------|------------------------------|
| R01_cb17090_c0/f2p0/970      | NA                          | NA                           | NA                          | R01_cb17090_c0/f2p0/970      |
| R01_cb10205_c1/f1p0/2470     | NA                          | R01_cb10205_c1/f1p0/2470     | NA                          | R01_cb10205_c1/f1p0/2470     |
| R01_cb12620_c7/f1p0/1293     | NA                          | NA                           | NA                          | R01_cb12620_c7/f1p0/1293     |
| R01_cb5900_c133/f1p0/2151    | R01_cb5900_c133/f1p0/2151   | R01_cb5900_c133/f1p0/2151    | NA                          | R01_cb5900_c133/f1p0/2151    |
| R01_cb9388_c0/f1p0/2098      | NA                          | R01_cb9388_c0/f1p0/2098      | R01_cb9388_c0/f1p0/2098     | R01_cb9388_c0/f1p0/2098      |
| R01_cb5442_c2/f1p0/3163      | NA                          | NA                           | R01_cb5442_c2/f1p0/3163     | R01_cb5442_c2/f1p0/3163      |
| R01_cb8564_c74609/f3p0/2650  | NA                          | NA                           | R01_cb8564_c74609/f3p0/2650 | R01_cb8564_c74609/f3p0/2650  |
| R01_cb3421_c0/f5p1/2836      | NA                          | NA                           | NA                          | R01_cb3421_c0/f5p1/2836      |
| R01_cb15465_c5/f1p3/519      | R01_cb15465_c5/f1p3/519     | NA                           | R01_cb15465_c5/f1p3/519     | R01_cb15465_c5/f1p3/519      |
| R01_cb8564_c125469/f1p0/3715 | NA                          | R01_cb8564_c125469/f1p0/3715 | NA                          | R01_cb8564_c125469/f1p0/3715 |
| R01_cb13134_c8/f1p0/1569     | NA                          | NA                           | NA                          | R01_cb13134_c8/f1p0/1569     |
| R01_cb13260_c1/f3p0/811      | NA                          | NA                           | NA                          | R01_cb13260_c1/f3p0/811      |
| R01_cb2045_c4/f1p0/3368      | NA                          | NA                           | NA                          | R01_cb2045_c4/f1p0/3368      |
| R01_cb8564_c10473/f1p0/2908  | R01_cb8564_c10473/f1p0/2908 | R01_cb8564_c10473/f1p0/2908  | R01_cb8564_c10473/f1p0/2908 | R01_cb8564_c10473/f1p0/2908  |
| R01_cb4269_c11/f2p0/2147     | NA                          | NA                           | NA                          | R01_cb4269_c11/f2p0/2147     |
| R01_cb8564_c84381/f1p0/2854  | NA                          | R01_cb8564_c84381/f1p0/2854  | NA                          | NA                           |
| R01_cb16983_c2/f1p0/1826     | NA                          | R01_cb16983_c2/f1p0/1826     | NA                          | NA                           |
| R01_cb17576_c0/f4p1/755      | NA                          | NA                           | R01_cb17576_c0/f4p1/755     | R01_cb17576_c0/f4p1/755      |
| R01_cb1568_c3/f1p0/4264      | NA                          | R01_cb1568_c3/f1p0/4264      | NA                          | R01_cb1568_c3/f1p0/4264      |
| R01_cb6393_c7/f1p0/5586      | NA                          | NA                           | NA                          | R01_cb6393_c7/f1p0/5586      |
| R01_cb8564_c19343/f1p0/3358  | NA                          | R01_cb8564_c19343/f1p0/3358  | R01_cb8564_c19343/f1p0/3358 | R01_cb8564_c19343/f1p0/3358  |
| R01_cb12785_c13/f1p0/912     | NA                          | NA                           | R01_cb12785_c13/f1p0/912    | NA                           |
| R01_cb4354_c16/f1p1/2988     | NA                          | NA                           | NA                          | R01_cb4354_c16/f1p1/2988     |
| R01_cb18409_c151/f1p0/633    | NA                          | R01_cb18409_c151/f1p0/633    | R01_cb18409_c151/f1p0/633   | R01_cb18409_c151/f1p0/633    |

|                             |                             |                             |                             |                             |
|-----------------------------|-----------------------------|-----------------------------|-----------------------------|-----------------------------|
| R01_cb14086_c0/f3p0/694     | NA                          | NA                          | NA                          | R01_cb14086_c0/f3p0/694     |
| R01_cb16593_c1/flp0/479     | R01_cb16593_c1/flp0/479     | R01_cb16593_c1/flp0/479     | R01_cb16593_c1/flp0/479     | R01_cb16593_c1/flp0/479     |
| R01_cb18287_c9/flp0/443     | R01_cb18287_c9/flp0/443     | R01_cb18287_c9/flp0/443     | R01_cb18287_c9/flp0/443     | R01_cb18287_c9/flp0/443     |
| R01_cb6867_c6/flp0/792      | NA                          | NA                          | NA                          | R01_cb6867_c6/flp0/792      |
| R01_cb8564_c90975/flp1/2258 | R01_cb8564_c90975/flp1/2258 | R01_cb8564_c90975/flp1/2258 | R01_cb8564_c90975/flp1/2258 | R01_cb8564_c90975/flp1/2258 |
| R01_cb13884_c21/flp0/889    | R01_cb13884_c21/flp0/889    | NA                          | R01_cb13884_c21/flp0/889    | R01_cb13884_c21/flp0/889    |
| R01_cb8564_c79338/flp0/3856 | NA                          | NA                          | NA                          | R01_cb8564_c79338/flp0/3856 |
| R01_cb12827_c1/f2p0/1376    | NA                          | NA                          | NA                          | R01_cb12827_c1/f2p0/1376    |
| R01_cb10450_c1/flp0/2017    | R01_cb10450_c1/flp0/2017    | R01_cb10450_c1/flp0/2017    | NA                          | NA                          |
| R01_cb18456_c7206/flp0/366  | R01_cb18456_c7206/flp0/366  | R01_cb18456_c7206/flp0/366  | R01_cb18456_c7206/flp0/366  | R01_cb18456_c7206/flp0/366  |
| R01_cb6680_c4/flp0/2326     | NA                          | NA                          | NA                          | R01_cb6680_c4/flp0/2326     |
| R01_cb18649_c2/flp0/3942    | NA                          | NA                          | NA                          | R01_cb18649_c2/flp0/3942    |
| R01_cb646_c1/flp0/4677      | NA                          | NA                          | NA                          | R01_cb646_c1/flp0/4677      |
| R01_cb3516_c5/flp0/2166     | NA                          | NA                          | NA                          | R01_cb3516_c5/flp0/2166     |
| R01_cb13279_c0/flp0/1113    | NA                          | R01_cb13279_c0/flp0/1113    | R01_cb13279_c0/flp0/1113    | R01_cb13279_c0/flp0/1113    |
| R01_cb13146_c6/flp0/1286    | NA                          | R01_cb13146_c6/flp0/1286    | R01_cb13146_c6/flp0/1286    | NA                          |
| R01_cb16457_c2/flp0/511     | R01_cb16457_c2/flp0/511     | R01_cb16457_c2/flp0/511     | R01_cb16457_c2/flp0/511     | R01_cb16457_c2/flp0/511     |
| R01_cb10385_c7/flp0/1425    | NA                          | R01_cb10385_c7/flp0/1425    | NA                          | NA                          |
| R01_cb17843_c2/flp0/771     | NA                          | R01_cb17843_c2/flp0/771     | NA                          | NA                          |
| R01_cb11743_c1/flp0/2887    | NA                          | NA                          | R01_cb11743_c1/flp0/2887    | R01_cb11743_c1/flp0/2887    |
| R01_cb5408_c0/flp0/3110     | NA                          | R01_cb5408_c0/flp0/3110     | NA                          | NA                          |
| R01_cb8564_c83794/flp0/2318 | NA                          | R01_cb8564_c83794/flp0/2318 | NA                          | NA                          |
| R01_cb8564_c46080/flp0/2632 | NA                          | R01_cb8564_c46080/flp0/2632 | NA                          | NA                          |
| R01_cb11524_c2/flp1/1158    | NA                          | NA                          | NA                          | R01_cb11524_c2/flp1/1158    |
| R01_cb10364_c3/flp0/3091    | NA                          | NA                          | NA                          | R01_cb10364_c3/flp0/3091    |

|                             |                                  |                             |                             |                             |
|-----------------------------|----------------------------------|-----------------------------|-----------------------------|-----------------------------|
| R01_cb6008_c0/flp0/2955     | NA                               | NA                          | NA                          | R01_cb6008_c0/flp0/2955     |
| R01_cb8564_c76969/flp0/3171 | R01_cb8564_c76969/flp0/3171<br>1 | R01_cb8564_c76969/flp0/3171 | R01_cb8564_c76969/flp0/3171 | R01_cb8564_c76969/flp0/3171 |
| R01_cb10668_c11/f2p0/563    | NA                               | R01_cb10668_c11/f2p0/563    | NA                          | NA                          |
| R01_cb5455_c2/flp0/2984     | NA                               | R01_cb5455_c2/flp0/2984     | NA                          | NA                          |
| R01_cb12057_c51/flp0/977    | R01_cb12057_c51/flp0/977         | R01_cb12057_c51/flp0/977    | R01_cb12057_c51/flp0/977    | R01_cb12057_c51/flp0/977    |
| R01_cb9272_c2/f2p0/658      | NA                               | R01_cb9272_c2/f2p0/658      | R01_cb9272_c2/f2p0/658      | R01_cb9272_c2/f2p0/658      |
| R01_cb14023_c2/flp0/466     | R01_cb14023_c2/flp0/466          | NA                          | NA                          | R01_cb14023_c2/flp0/466     |
| R01_cb4345_c19/f6p1/3377    | NA                               | NA                          | NA                          | R01_cb4345_c19/f6p1/3377    |
| R01_cb9231_c2/f3p0/2135     | NA                               | R01_cb9231_c2/f3p0/2135     | R01_cb9231_c2/f3p0/2135     | R01_cb9231_c2/f3p0/2135     |
| R01_cb1860_c5/flp0/4077     | NA                               | NA                          | NA                          | R01_cb1860_c5/flp0/4077     |
| R01_cb12584_c3/flp0/1577    | NA                               | NA                          | NA                          | R01_cb12584_c3/flp0/1577    |
| R01_cb10434_c2/flp0/2083    | NA                               | R01_cb10434_c2/flp0/2083    | NA                          | R01_cb10434_c2/flp0/2083    |
| R01_cb11190_c3/flp0/1176    | NA                               | NA                          | NA                          | R01_cb11190_c3/flp0/1176    |
| R01_cb6914_c19/flp0/2036    | NA                               | R01_cb6914_c19/flp0/2036    | NA                          | NA                          |
| R01_cb16196_c0/flp0/1689    | NA                               | R01_cb16196_c0/flp0/1689    | R01_cb16196_c0/flp0/1689    | R01_cb16196_c0/flp0/1689    |
| R01_cb8478_c79/flp0/2396    | NA                               | NA                          | NA                          | R01_cb8478_c79/flp0/2396    |
| R01_cb6627_c0/flp0/2804     | R01_cb6627_c0/flp0/2804          | R01_cb6627_c0/flp0/2804     | NA                          | NA                          |
| R01_cb10350_c7/f18p1/1046   | NA                               | NA                          | NA                          | R01_cb10350_c7/f18p1/1046   |
| R01_cb6802_c20/flp0/3496    | NA                               | R01_cb6802_c20/flp0/3496    | NA                          | R01_cb6802_c20/flp0/3496    |
| R01_cb16645_c50/flp0/800    | NA                               | R01_cb16645_c50/flp0/800    | NA                          | NA                          |
| R01_cb8564_c78269/flp0/4689 | NA                               | R01_cb8564_c78269/flp0/4689 | NA                          | NA                          |
| R01_cb16135_c2/flp0/536     | R01_cb16135_c2/flp0/536          | R01_cb16135_c2/flp0/536     | R01_cb16135_c2/flp0/536     | R01_cb16135_c2/flp0/536     |
| R01_cb8564_c14403/flp0/2739 | NA                               | NA                          | NA                          | R01_cb8564_c14403/flp0/2739 |
| R01_cb8564_c31974/f8p6/4543 | NA                               | NA                          | NA                          | R01_cb8564_c31974/f8p6/4543 |
| R01_cb5177_c4/flp0/2104     | R01_cb5177_c4/flp0/2104          | R01_cb5177_c4/flp0/2104     | R01_cb5177_c4/flp0/2104     | R01_cb5177_c4/flp0/2104     |

|                             |                         |                             |                          |                             |
|-----------------------------|-------------------------|-----------------------------|--------------------------|-----------------------------|
| R01_cb1398_c0/flp0/4333     | NA                      | R01_cb1398_c0/flp0/4333     | R01_cb1398_c0/flp0/4333  | NA                          |
| R01_cb14019_c7/flp0/1630    | NA                      | R01_cb14019_c7/flp0/1630    | R01_cb14019_c7/flp0/1630 | R01_cb14019_c7/flp0/1630    |
| R01_cb12133_c0/flp0/1051    | NA                      | NA                          | NA                       | R01_cb12133_c0/flp0/1051    |
| R01_cb15537_c7/flp0/658     | NA                      | R01_cb15537_c7/flp0/658     | R01_cb15537_c7/flp0/658  | R01_cb15537_c7/flp0/658     |
| R01_cb13781_c14/f6p0/563    | NA                      | NA                          | NA                       | R01_cb13781_c14/f6p0/563    |
| R01_cb2465_c15/flp0/346     | R01_cb2465_c15/flp0/346 | R01_cb2465_c15/flp0/346     | NA                       | R01_cb2465_c15/flp0/346     |
| R01_cb11634_c1/flp0/2196    | NA                      | R01_cb11634_c1/flp0/2196    | NA                       | NA                          |
| R01_cb7898_c3/f2p0/1492     | NA                      | R01_cb7898_c3/f2p0/1492     | NA                       | R01_cb7898_c3/f2p0/1492     |
| R01_cb9928_c3/flp0/3979     | NA                      | NA                          | NA                       | R01_cb9928_c3/flp0/3979     |
| R01_cb15910_c2/flp0/464     | R01_cb15910_c2/flp0/464 | R01_cb15910_c2/flp0/464     | NA                       | NA                          |
| R01_cb15227_c6/f2p0/1424    | NA                      | NA                          | NA                       | R01_cb15227_c6/f2p0/1424    |
| R01_cb2200_c3/flp0/3495     | R01_cb2200_c3/flp0/3495 | R01_cb2200_c3/flp0/3495     | R01_cb2200_c3/flp0/3495  | R01_cb2200_c3/flp0/3495     |
| R01_cb12461_c2/flp0/734     | NA                      | R01_cb12461_c2/flp0/734     | NA                       | R01_cb12461_c2/flp0/734     |
| R01_cb2715_c2/flp0/2264     | R01_cb2715_c2/flp0/2264 | R01_cb2715_c2/flp0/2264     | NA                       | NA                          |
| R01_cb18737_c1/flp0/651     | NA                      | NA                          | NA                       | R01_cb18737_c1/flp0/651     |
| R01_cb2275_c9/flp0/5025     | NA                      | NA                          | NA                       | R01_cb2275_c9/flp0/5025     |
| R01_cb5251_c5/flp0/2735     | NA                      | NA                          | NA                       | R01_cb5251_c5/flp0/2735     |
| R01_cb2701_c1/f2p0/1300     | NA                      | NA                          | NA                       | R01_cb2701_c1/f2p0/1300     |
| R01_cb18409_c36/flp0/624    | NA                      | R01_cb18409_c36/flp0/624    | R01_cb18409_c36/flp0/624 | R01_cb18409_c36/flp0/624    |
| R01_cb7909_c0/f4p0/2280     | R01_cb7909_c0/f4p0/2280 | R01_cb7909_c0/f4p0/2280     | R01_cb7909_c0/f4p0/2280  | R01_cb7909_c0/f4p0/2280     |
| R01_cb8564_c3753/flp0/2799  | NA                      | R01_cb8564_c3753/flp0/2799  | NA                       | NA                          |
| R01_cb8564_c20252/flp0/4765 | NA                      | R01_cb8564_c20252/flp0/4765 | NA                       | NA                          |
| R01_cb6170_c31/flp0/2237    | NA                      | NA                          | NA                       | R01_cb6170_c31/flp0/2237    |
| R01_cb18456_c7331/flp0/1803 | NA                      | R01_cb18456_c7331/flp0/1803 | NA                       | R01_cb18456_c7331/flp0/1803 |
| R01_cb8478_c42/flp0/2103    | NA                      | R01_cb8478_c42/flp0/2103    | R01_cb8478_c42/flp0/2103 | R01_cb8478_c42/flp0/2103    |
| R01_cb6591_c6/f2p1/728      | R01_cb6591_c6/f2p1/728  | R01_cb6591_c6/f2p1/728      | NA                       | NA                          |

|                              |                             |                              |                            |                             |
|------------------------------|-----------------------------|------------------------------|----------------------------|-----------------------------|
| R01_cb1827_c0/flp0/4155      | NA                          | R01_cb1827_c0/flp0/4155      | R01_cb1827_c0/flp0/4155    | NA                          |
| R01_cb4637_c4/flp0/2621      | R01_cb4637_c4/flp0/2621     | R01_cb4637_c4/flp0/2621      | R01_cb4637_c4/flp0/2621    | R01_cb4637_c4/flp0/2621     |
| R01_cb17956_c12/flp0/751     | NA                          | R01_cb17956_c12/flp0/751     | NA                         | NA                          |
| R01_cb11151_c0/flp0/1503     | NA                          | NA                           | NA                         | R01_cb11151_c0/flp0/1503    |
| R01_cb6170_c24/flp1/2725     | NA                          | NA                           | NA                         | R01_cb6170_c24/flp1/2725    |
| R01_cb18033_c0/flp0/500      | NA                          | R01_cb18033_c0/flp0/500      | R01_cb18033_c0/flp0/500    | R01_cb18033_c0/flp0/500     |
| R01_cb8564_c4091/flp0/3908   | NA                          | R01_cb8564_c4091/flp0/3908   | R01_cb8564_c4091/flp0/3908 | NA                          |
| R01_cb15186_c4/f6p0/461      | R01_cb15186_c4/f6p0/461     | R01_cb15186_c4/f6p0/461      | R01_cb15186_c4/f6p0/461    | NA                          |
| R01_cb10190_c4/flp0/1454     | R01_cb10190_c4/flp0/1454    | R01_cb10190_c4/flp0/1454     | R01_cb10190_c4/flp0/1454   | R01_cb10190_c4/flp0/1454    |
| R01_cb10272_c22/flp0/1736    | NA                          | NA                           | NA                         | R01_cb10272_c22/flp0/1736   |
| R01_cb16823_c1/flp0/1354     | NA                          | R01_cb16823_c1/flp0/1354     | NA                         | R01_cb16823_c1/flp0/1354    |
| R01_cb8564_c41870/flp0/3436  | R01_cb8564_c41870/flp0/3436 | R01_cb8564_c41870/flp0/3436  | NA                         | R01_cb8564_c41870/flp0/3436 |
| R01_cb10970_c4/flp0/1737     | NA                          | NA                           | NA                         | R01_cb10970_c4/flp0/1737    |
| R01_cb473_c0/flp0/4800       | NA                          | R01_cb473_c0/flp0/4800       | R01_cb473_c0/flp0/4800     | R01_cb473_c0/flp0/4800      |
| R01_cb9748_c2/flp0/1968      | NA                          | NA                           | NA                         | R01_cb9748_c2/flp0/1968     |
| R01_cb5690_c4/flp0/3237      | NA                          | NA                           | NA                         | R01_cb5690_c4/flp0/3237     |
| R01_cb8564_c43373/flp0/2035  | NA                          | NA                           | NA                         | R01_cb8564_c43373/flp0/2035 |
| R01_cb18456_c4749/flp0/492   | R01_cb18456_c4749/flp0/492  | R01_cb18456_c4749/flp0/492   | R01_cb18456_c4749/flp0/492 | R01_cb18456_c4749/flp0/492  |
| R01_cb8160_c2/flp0/2208      | NA                          | NA                           | NA                         | R01_cb8160_c2/flp0/2208     |
| R01_cb7731_c5/flp0/1555      | NA                          | NA                           | NA                         | R01_cb7731_c5/flp0/1555     |
| R01_cb8564_c122668/flp0/2438 | NA                          | R01_cb8564_c122668/flp0/2438 | NA                         | NA                          |
| R01_cb2060_c4/flp1/3578      | NA                          | NA                           | NA                         | R01_cb2060_c4/flp1/3578     |
| R01_cb4352_c11/flp0/2279     | NA                          | NA                           | NA                         | R01_cb4352_c11/flp0/2279    |
| R01_cb5547_c0/f3p1/3019      | NA                          | NA                           | NA                         | R01_cb5547_c0/f3p1/3019     |

|                              |                                  |                              |                             |                             |
|------------------------------|----------------------------------|------------------------------|-----------------------------|-----------------------------|
| R01_cb6501_c0/flp1/2842      | NA                               | R01_cb6501_c0/flp1/2842      | NA                          | NA                          |
| R01_cb3072_c7/flp0/6010      | NA                               | R01_cb3072_c7/flp0/6010      | NA                          | NA                          |
| R01_cb8564_c44420/flp0/2853  | NA                               | R01_cb8564_c44420/flp0/2853  | NA                          | NA                          |
| R01_cb3281_c3/flp0/3678      | NA                               | R01_cb3281_c3/flp0/3678      | NA                          | NA                          |
| R01_cb15574_c2/flp0/503      | NA                               | NA                           | R01_cb15574_c2/flp0/503     | R01_cb15574_c2/flp0/503     |
| R01_cb11801_c0/flp0/1327     | NA                               | NA                           | NA                          | R01_cb11801_c0/flp0/1327    |
| R01_cb4089_c4/flp0/3057      | NA                               | NA                           | NA                          | R01_cb4089_c4/flp0/3057     |
| R01_cb11825_c1/flp0/1962     | R01_cb11825_c1/flp0/1962         | R01_cb11825_c1/flp0/1962     | R01_cb11825_c1/flp0/1962    | R01_cb11825_c1/flp0/1962    |
| R01_cb8564_c36823/flp0/2430  | NA                               | NA                           | NA                          | R01_cb8564_c36823/flp0/2430 |
| R01_cb9664_c0/flp0/2005      | NA                               | R01_cb9664_c0/flp0/2005      | R01_cb9664_c0/flp0/2005     | R01_cb9664_c0/flp0/2005     |
| R01_cb6523_c5/flp0/2346      | NA                               | NA                           | NA                          | R01_cb6523_c5/flp0/2346     |
| R01_cb2497_c8/flp0/1832      | NA                               | NA                           | NA                          | R01_cb2497_c8/flp0/1832     |
| R01_cb15018_c0/f7p1/531      | NA                               | R01_cb15018_c0/f7p1/531      | R01_cb15018_c0/f7p1/531     | R01_cb15018_c0/f7p1/531     |
| R01_cb13087_c0/f5p1/508      | NA                               | NA                           | NA                          | R01_cb13087_c0/f5p1/508     |
| R01_cb7514_c0/flp0/2605      | R01_cb7514_c0/flp0/2605          | R01_cb7514_c0/flp0/2605      | R01_cb7514_c0/flp0/2605     | R01_cb7514_c0/flp0/2605     |
| R01_cb8564_c74169/flp0/3403  | R01_cb8564_c74169/flp0/3403<br>3 | R01_cb8564_c74169/flp0/3403  | R01_cb8564_c74169/flp0/3403 | NA                          |
| R01_cb8564_c3069/f4p0/2737   | NA                               | R01_cb8564_c3069/f4p0/2737   | NA                          | R01_cb8564_c3069/f4p0/2737  |
| R01_cb8564_c116267/flp5/3275 | NA                               | R01_cb8564_c116267/flp5/3275 | NA                          | NA                          |
| R01_cb5486_c1/flp1/2323      | R01_cb5486_c1/flp1/2323          | R01_cb5486_c1/flp1/2323      | R01_cb5486_c1/flp1/2323     | R01_cb5486_c1/flp1/2323     |
| R01_cb13441_c0/f2p0/1589     | NA                               | NA                           | NA                          | R01_cb13441_c0/f2p0/1589    |
| R01_cb17637_c3/flp1/923      | NA                               | R01_cb17637_c3/flp1/923      | NA                          | NA                          |
| R01_cb16190_c0/f2p0/552      | NA                               | R01_cb16190_c0/f2p0/552      | NA                          | NA                          |
| R01_cb2710_c12/flp0/2313     | NA                               | R01_cb2710_c12/flp0/2313     | NA                          | R01_cb2710_c12/flp0/2313    |
| R01_cb11736_c1/flp0/2001     | R01_cb11736_c1/flp0/2001         | R01_cb11736_c1/flp0/2001     | R01_cb11736_c1/flp0/2001    | NA                          |

|                              |                              |                              |                              |                              |
|------------------------------|------------------------------|------------------------------|------------------------------|------------------------------|
| R01_cb10811_c4/f2p0/570      | NA                           | R01_cb10811_c4/f2p0/570      | NA                           | NA                           |
| R01_cb8564_c115650/flp1/2216 | NA                           | R01_cb8564_c115650/flp1/2216 | NA                           | NA                           |
| R01_cb6570_c5/flp0/793       | R01_cb6570_c5/flp0/793       | R01_cb6570_c5/flp0/793       | NA                           | R01_cb6570_c5/flp0/793       |
| R01_cb8564_c4502/flp0/1960   | NA                           | NA                           | NA                           | R01_cb8564_c4502/flp0/1960   |
| R01_cb1772_c25/flp0/3497     | NA                           | R01_cb1772_c25/flp0/3497     | NA                           | NA                           |
| R01_cb9535_c9/flp0/2200      | NA                           | R01_cb9535_c9/flp0/2200      | R01_cb9535_c9/flp0/2200      | R01_cb9535_c9/flp0/2200      |
| R01_cb8564_c44016/f2p0/2743  | NA                           | NA                           | NA                           | R01_cb8564_c44016/f2p0/2743  |
| R01_cb8564_c23779/flp0/3567  | R01_cb8564_c23779/flp0/3567  | R01_cb8564_c23779/flp0/3567  | R01_cb8564_c23779/flp0/3567  | R01_cb8564_c23779/flp0/3567  |
| R01_cb5390_c7/flp0/1946      | NA                           | R01_cb5390_c7/flp0/1946      | NA                           | NA                           |
| R01_cb2771_c8/flp0/3405      | NA                           | NA                           | NA                           | R01_cb2771_c8/flp0/3405      |
| R01_cb18456_c2515/flp0/1051  | NA                           | R01_cb18456_c2515/flp0/1051  | NA                           | R01_cb18456_c2515/flp0/1051  |
| R01_cb16980_c1/f3p0/1033     | NA                           | NA                           | NA                           | R01_cb16980_c1/f3p0/1033     |
| R01_cb11325_c1/flp0/3215     | NA                           | R01_cb11325_c1/flp0/3215     | NA                           | R01_cb11325_c1/flp0/3215     |
| R01_cb17316_c0/f2p0/665      | R01_cb17316_c0/f2p0/665      | NA                           | NA                           | NA                           |
| R01_cb10781_c2/flp0/2241     | NA                           | R01_cb10781_c2/flp0/2241     | R01_cb10781_c2/flp0/2241     | NA                           |
| R01_cb1739_c18/flp0/768      | R01_cb1739_c18/flp0/768      | R01_cb1739_c18/flp0/768      | R01_cb1739_c18/flp0/768      | R01_cb1739_c18/flp0/768      |
| R01_cb8564_c118827/f2p1/2220 | R01_cb8564_c118827/f2p1/2220 | R01_cb8564_c118827/f2p1/2220 | R01_cb8564_c118827/f2p1/2220 | R01_cb8564_c118827/f2p1/2220 |
| R01_cb10292_c1/f5p0/1124     | NA                           | NA                           | NA                           | R01_cb10292_c1/f5p0/1124     |
| R01_cb10201_c4/flp0/2090     | NA                           | R01_cb10201_c4/flp0/2090     | NA                           | NA                           |
| R01_cb6845_c9/f2p1/2314      | NA                           | NA                           | NA                           | R01_cb6845_c9/f2p1/2314      |
| R01_cb8564_c87792/flp0/2774  | NA                           | NA                           | NA                           | R01_cb8564_c87792/flp0/2774  |
| R01_cb14472_c6/flp0/747      | NA                           | R01_cb14472_c6/flp0/747      | NA                           | R01_cb14472_c6/flp0/747      |
| R01_cb13608_c6/flp0/1530     | NA                           | R01_cb13608_c6/flp0/1530     | NA                           | NA                           |

|                              |                            |                             |                            |                              |
|------------------------------|----------------------------|-----------------------------|----------------------------|------------------------------|
| R01_cb8564_c90429/flp0/4285  | NA                         | R01_cb8564_c90429/flp0/4285 | NA                         | NA                           |
| R01_cb2895_c3/flp0/2477      | NA                         | R01_cb2895_c3/flp0/2477     | NA                         | NA                           |
| R01_cb18132_c16/flp0/1559    | NA                         | R01_cb18132_c16/flp0/1559   | NA                         | R01_cb18132_c16/flp0/1559    |
| R01_cb18456_c7428/flp0/405   | R01_cb18456_c7428/flp0/405 | R01_cb18456_c7428/flp0/405  | R01_cb18456_c7428/flp0/405 | R01_cb18456_c7428/flp0/405   |
| R01_cb8564_c3996/flp0/2108   | NA                         | NA                          | R01_cb8564_c3996/flp0/2108 | R01_cb8564_c3996/flp0/2108   |
| R01_cb18409_c111/flp0/1749   | R01_cb18409_c111/flp0/1749 | R01_cb18409_c111/flp0/1749  | NA                         | R01_cb18409_c111/flp0/1749   |
| R01_cb13613_c2/flp0/1443     | NA                         | NA                          | NA                         | R01_cb13613_c2/flp0/1443     |
| R01_cb3087_c8/flp0/3738      | R01_cb3087_c8/flp0/3738    | R01_cb3087_c8/flp0/3738     | NA                         | R01_cb3087_c8/flp0/3738      |
| R01_cb15845_c0/f3p1/658      | NA                         | R01_cb15845_c0/f3p1/658     | NA                         | NA                           |
| R01_cb6894_c5/flp0/2753      | NA                         | R01_cb6894_c5/flp0/2753     | R01_cb6894_c5/flp0/2753    | NA                           |
| R01_cb18456_c5374/flp5/801   | NA                         | R01_cb18456_c5374/flp5/801  | NA                         | NA                           |
| R01_cb10074_c15/flp4/662     | R01_cb10074_c15/flp4/662   | R01_cb10074_c15/flp4/662    | R01_cb10074_c15/flp4/662   | R01_cb10074_c15/flp4/662     |
| R01_cb4744_c8/flp0/1289      | R01_cb4744_c8/flp0/1289    | R01_cb4744_c8/flp0/1289     | R01_cb4744_c8/flp0/1289    | R01_cb4744_c8/flp0/1289      |
| R01_cb2399_c12/flp0/2076     | NA                         | R01_cb2399_c12/flp0/2076    | R01_cb2399_c12/flp0/2076   | R01_cb2399_c12/flp0/2076     |
| R01_cb261_c17/flp1/3635      | NA                         | NA                          | NA                         | R01_cb261_c17/flp1/3635      |
| R01_cb13760_c1/f2p0/1489     | NA                         | NA                          | NA                         | R01_cb13760_c1/f2p0/1489     |
| R01_cb18456_c6831/flp0/722   | NA                         | R01_cb18456_c6831/flp0/722  | NA                         | NA                           |
| R01_cb8564_c127279/flp0/2052 | NA                         | NA                          | NA                         | R01_cb8564_c127279/flp0/2052 |
| R01_cb18456_c7680/flp0/485   | R01_cb18456_c7680/flp0/485 | R01_cb18456_c7680/flp0/485  | NA                         | R01_cb18456_c7680/flp0/485   |
| R01_cb5475_c8/flp1/3007      | NA                         | R01_cb5475_c8/flp1/3007     | NA                         | NA                           |
| R01_cb16527_c1/flp0/1263     | NA                         | R01_cb16527_c1/flp0/1263    | NA                         | NA                           |
| R01_cb15680_c11/flp0/493     | R01_cb15680_c11/flp0/493   | R01_cb15680_c11/flp0/493    | R01_cb15680_c11/flp0/493   | R01_cb15680_c11/flp0/493     |
| R01_cb15522_c1/flp0/1010     | NA                         | NA                          | NA                         | R01_cb15522_c1/flp0/1010     |
| R01_cb18409_c66/flp0/351     | R01_cb18409_c66/flp0/351   | R01_cb18409_c66/flp0/351    | R01_cb18409_c66/flp0/351   | R01_cb18409_c66/flp0/351     |
| R01_cb4268_c0/f2p0/3087      | NA                         | NA                          | NA                         | R01_cb4268_c0/f2p0/3087      |



|                             |                          |                            |                            |                             |
|-----------------------------|--------------------------|----------------------------|----------------------------|-----------------------------|
| R01_cb18065_c0/f1p0/1830    | NA                       | R01_cb18065_c0/f1p0/1830   | R01_cb18065_c0/f1p0/1830   | NA                          |
| R01_cb12450_c0/f2p0/796     | R01_cb12450_c0/f2p0/796  | R01_cb12450_c0/f2p0/796    | R01_cb12450_c0/f2p0/796    | R01_cb12450_c0/f2p0/796     |
| R01_cb3518_c7/f1p0/3655     | NA                       | NA                         | NA                         | R01_cb3518_c7/f1p0/3655     |
| R01_cb8564_c4732/f3p0/3755  | NA                       | NA                         | NA                         | R01_cb8564_c4732/f3p0/3755  |
| R01_cb10453_c2/f2p0/1102    | NA                       | NA                         | R01_cb10453_c2/f2p0/1102   | R01_cb10453_c2/f2p0/1102    |
| R01_cb4945_c4/f1p0/2080     | NA                       | R01_cb4945_c4/f1p0/2080    | NA                         | NA                          |
| R01_cb18456_c1294/f9p0/374  | NA                       | R01_cb18456_c1294/f9p0/374 | R01_cb18456_c1294/f9p0/374 | R01_cb18456_c1294/f9p0/374  |
| R01_cb8564_c52554/f1p3/3826 | NA                       | NA                         | NA                         | R01_cb8564_c52554/f1p3/3826 |
| R01_cb8478_c19/f1p0/2531    | R01_cb8478_c19/f1p0/2531 | R01_cb8478_c19/f1p0/2531   | NA                         | NA                          |
| R01_cb18456_c3840/f1p0/935  | NA                       | R01_cb18456_c3840/f1p0/935 | NA                         | NA                          |
| R01_cb18443_c1/f1p0/352     | NA                       | R01_cb18443_c1/f1p0/352    | NA                         | R01_cb18443_c1/f1p0/352     |
| R01_cb11787_c1/f1p0/3167    | NA                       | R01_cb11787_c1/f1p0/3167   | NA                         | NA                          |
| R01_cb3124_c5/f1p0/968      | NA                       | R01_cb3124_c5/f1p0/968     | NA                         | R01_cb3124_c5/f1p0/968      |
| R01_cb3388_c11/f1p0/3143    | NA                       | NA                         | NA                         | R01_cb3388_c11/f1p0/3143    |
| R01_cb4117_c3/f1p0/3377     | NA                       | NA                         | NA                         | R01_cb4117_c3/f1p0/3377     |
| R01_cb18409_c89/f1p0/396    | R01_cb18409_c89/f1p0/396 | R01_cb18409_c89/f1p0/396   | R01_cb18409_c89/f1p0/396   | R01_cb18409_c89/f1p0/396    |
| R01_cb3132_c5/f1p0/1825     | NA                       | NA                         | NA                         | R01_cb3132_c5/f1p0/1825     |
| R01_cb13910_c25/f1p1/787    | NA                       | R01_cb13910_c25/f1p1/787   | NA                         | NA                          |
| R01_cb13463_c13/f1p1/1233   | NA                       | NA                         | NA                         | R01_cb13463_c13/f1p1/1233   |
| R01_cb9592_c4/f1p1/1927     | NA                       | NA                         | NA                         | R01_cb9592_c4/f1p1/1927     |
| R01_cb15724_c1/f2p0/1155    | NA                       | R01_cb15724_c1/f2p0/1155   | R01_cb15724_c1/f2p0/1155   | R01_cb15724_c1/f2p0/1155    |
| R01_cb3104_c1/f1p0/3078     | NA                       | NA                         | R01_cb3104_c1/f1p0/3078    | R01_cb3104_c1/f1p0/3078     |
| R01_cb11222_c1/f1p0/2234    | R01_cb11222_c1/f1p0/2234 | R01_cb11222_c1/f1p0/2234   | NA                         | R01_cb11222_c1/f1p0/2234    |
| R01_cb10029_c1141/f1p0/893  | NA                       | R01_cb10029_c1141/f1p0/893 | NA                         | NA                          |
| R01_cb5234_c2/f1p0/3147     | NA                       | NA                         | NA                         | R01_cb5234_c2/f1p0/3147     |
| R01_cb17329_c0/f2p0/1184    | NA                       | NA                         | NA                         | R01_cb17329_c0/f2p0/1184    |

|                                  |                             |                                  |                              |                              |
|----------------------------------|-----------------------------|----------------------------------|------------------------------|------------------------------|
| R01_cb8564_c115669/flp0/235<br>6 | NA                          | R01_cb8564_c115669/flp0/235<br>6 | NA                           | NA                           |
| R01_cb14576_c0/flp0/918          | NA                          | NA                               | R01_cb14576_c0/flp0/918      | R01_cb14576_c0/flp0/918      |
| R01_cb17398_c1/flp0/918          | NA                          | R01_cb17398_c1/flp0/918          | R01_cb17398_c1/flp0/918      | R01_cb17398_c1/flp0/918      |
| R01_cb3997_c1/flp0/3471          | NA                          | NA                               | NA                           | R01_cb3997_c1/flp0/3471      |
| R01_cb17756_c22/flp0/1432        | R01_cb17756_c22/flp0/1432   | R01_cb17756_c22/flp0/1432        | R01_cb17756_c22/flp0/1432    | NA                           |
| R01_cb16310_c0/flp0/1502         | NA                          | R01_cb16310_c0/flp0/1502         | R01_cb16310_c0/flp0/1502     | NA                           |
| R01_cb693_c2/flp0/4679           | NA                          | NA                               | NA                           | R01_cb693_c2/flp0/4679       |
| R01_cb15574_c3/flp0/554          | NA                          | NA                               | R01_cb15574_c3/flp0/554      | R01_cb15574_c3/flp0/554      |
| R01_cb8564_c37539/flp0/2105      | NA                          | R01_cb8564_c37539/flp0/2105      | NA                           | NA                           |
| R01_cb3997_c4/flp0/1734          | NA                          | NA                               | NA                           | R01_cb3997_c4/flp0/1734      |
| R01_cb11081_c8/f3p1/698          | NA                          | R01_cb11081_c8/f3p1/698          | R01_cb11081_c8/f3p1/698      | R01_cb11081_c8/f3p1/698      |
| R01_cb16070_c1/flp0/964          | NA                          | R01_cb16070_c1/flp0/964          | R01_cb16070_c1/flp0/964      | R01_cb16070_c1/flp0/964      |
| R01_cb18132_c2/flp0/1057         | R01_cb18132_c2/flp0/1057    | R01_cb18132_c2/flp0/1057         | R01_cb18132_c2/flp0/1057     | R01_cb18132_c2/flp0/1057     |
| R01_cb8564_c46895/flp0/2426      | NA                          | R01_cb8564_c46895/flp0/2426      | NA                           | NA                           |
| R01_cb12932_c1/flp0/868          | NA                          | R01_cb12932_c1/flp0/868          | NA                           | NA                           |
| R01_cb8564_c81886/flp0/2814      | R01_cb8564_c81886/flp0/2814 | R01_cb8564_c81886/flp0/2814      | R01_cb8564_c81886/flp0/2814  | R01_cb8564_c81886/flp0/2814  |
| R01_cb2771_c15/flp0/2825         | NA                          | NA                               | NA                           | R01_cb2771_c15/flp0/2825     |
| R01_cb8222_c0/f3p0/2427          | R01_cb8222_c0/f3p0/2427     | NA                               | R01_cb8222_c0/f3p0/2427      | R01_cb8222_c0/f3p0/2427      |
| R01_cb1388_c27/flp0/2564         | NA                          | R01_cb1388_c27/flp0/2564         | R01_cb1388_c27/flp0/2564     | NA                           |
| R01_cb8564_c118142/flp0/2095     | NA                          | R01_cb8564_c118142/flp0/2095     | NA                           | R01_cb8564_c118142/flp0/2095 |
| R01_cb5007_c11/flp0/454          | R01_cb5007_c11/flp0/454     | R01_cb5007_c11/flp0/454          | NA                           | NA                           |
| R01_cb8564_c128937/flp0/2105     | NA                          | NA                               | R01_cb8564_c128937/flp0/2105 | R01_cb8564_c128937/flp0/2105 |

|                             |                             |                             |                             |                             |
|-----------------------------|-----------------------------|-----------------------------|-----------------------------|-----------------------------|
| R01_cb13449_c0/flp1/655     | NA                          | NA                          | NA                          | R01_cb13449_c0/flp1/655     |
| R01_cb17375_c0/flp0/1561    | NA                          | R01_cb17375_c0/flp0/1561    | NA                          | NA                          |
| R01_cb11234_c2/flp0/1079    | NA                          | R01_cb11234_c2/flp0/1079    | NA                          | NA                          |
| R01_cb6623_c11/flp0/4586    | NA                          | R01_cb6623_c11/flp0/4586    | NA                          | NA                          |
| R01_cb2154_c4/f2p1/1756     | R01_cb2154_c4/f2p1/1756     | R01_cb2154_c4/f2p1/1756     | NA                          | NA                          |
| R01_cb11865_c3/flp0/1184    | NA                          | NA                          | NA                          | R01_cb11865_c3/flp0/1184    |
| R01_cb4254_c2/flp0/3624     | R01_cb4254_c2/flp0/3624     | R01_cb4254_c2/flp0/3624     | NA                          | NA                          |
| R01_cb11291_c1/flp0/1923    | R01_cb11291_c1/flp0/1923    | R01_cb11291_c1/flp0/1923    | R01_cb11291_c1/flp0/1923    | R01_cb11291_c1/flp0/1923    |
| R01_cb11538_c2/flp0/463     | NA                          | R01_cb11538_c2/flp0/463     | NA                          | R01_cb11538_c2/flp0/463     |
| R01_cb8564_c90015/flp0/3817 | NA                          | R01_cb8564_c90015/flp0/3817 | NA                          | NA                          |
| R01_cb6602_c46/flp0/3277    | NA                          | NA                          | NA                          | R01_cb6602_c46/flp0/3277    |
| R01_cb8564_c11196/f5p0/2303 | NA                          | R01_cb8564_c11196/f5p0/2303 | NA                          | NA                          |
| R01_cb8564_c87199/flp0/3286 | NA                          | R01_cb8564_c87199/flp0/3286 | NA                          | NA                          |
| R01_cb15904_c0/flp0/458     | NA                          | R01_cb15904_c0/flp0/458     | R01_cb15904_c0/flp0/458     | R01_cb15904_c0/flp0/458     |
| R01_cb10070_c4/f4p0/470     | R01_cb10070_c4/f4p0/470     | R01_cb10070_c4/f4p0/470     | NA                          | NA                          |
| R01_cb9455_c1/flp0/2626     | NA                          | R01_cb9455_c1/flp0/2626     | NA                          | NA                          |
| R01_cb13583_c4/flp0/1289    | NA                          | NA                          | NA                          | R01_cb13583_c4/flp0/1289    |
| R01_cb9855_c6/flp0/2887     | NA                          | R01_cb9855_c6/flp0/2887     | NA                          | R01_cb9855_c6/flp0/2887     |
| R01_cb6406_c37/flp0/3004    | NA                          | R01_cb6406_c37/flp0/3004    | NA                          | NA                          |
| R01_cb16993_c1/flp0/1410    | NA                          | NA                          | R01_cb16993_c1/flp0/1410    | NA                          |
| R01_cb10782_c3/flp0/962     | NA                          | R01_cb10782_c3/flp0/962     | R01_cb10782_c3/flp0/962     | R01_cb10782_c3/flp0/962     |
| R01_cb16520_c0/f4p0/1010    | NA                          | NA                          | NA                          | R01_cb16520_c0/f4p0/1010    |
| R01_cb12420_c0/f3p0/1198    | NA                          | NA                          | NA                          | R01_cb12420_c0/f3p0/1198    |
| R01_cb4248_c4/flp0/1483     | NA                          | R01_cb4248_c4/flp0/1483     | NA                          | NA                          |
| R01_cb534_c1/flp0/1898      | NA                          | R01_cb534_c1/flp0/1898      | NA                          | NA                          |
| R01_cb8564_c35960/f3p0/3902 | R01_cb8564_c35960/f3p0/3902 | R01_cb8564_c35960/f3p0/3902 | R01_cb8564_c35960/f3p0/3902 | R01_cb8564_c35960/f3p0/3902 |

|                              |                             |                              |                              |                              |
|------------------------------|-----------------------------|------------------------------|------------------------------|------------------------------|
|                              | 2                           |                              |                              |                              |
| R01_cb8564_c25643/f1p0/2449  | NA                          | R01_cb8564_c25643/f1p0/2449  | NA                           | NA                           |
| R01_cb13693_c6/f1p0/655      | R01_cb13693_c6/f1p0/655     | R01_cb13693_c6/f1p0/655      | R01_cb13693_c6/f1p0/655      | NA                           |
| R01_cb10074_c20/f28p2/568    | R01_cb10074_c20/f28p2/568   | R01_cb10074_c20/f28p2/568    | R01_cb10074_c20/f28p2/568    | R01_cb10074_c20/f28p2/568    |
| R01_cb10903_c6/f1p0/624      | NA                          | R01_cb10903_c6/f1p0/624      | NA                           | R01_cb10903_c6/f1p0/624      |
| R01_cb8564_c18174/f1p0/2275  | R01_cb8564_c18174/f1p0/2275 | R01_cb8564_c18174/f1p0/2275  | NA                           | NA                           |
| R01_cb15294_c0/f2p0/1330     | NA                          | R01_cb15294_c0/f2p0/1330     | R01_cb15294_c0/f2p0/1330     | R01_cb15294_c0/f2p0/1330     |
| R01_cb10873_c2/f1p0/1388     | NA                          | NA                           | NA                           | R01_cb10873_c2/f1p0/1388     |
| R01_cb11417_c1/f1p0/2745     | NA                          | R01_cb11417_c1/f1p0/2745     | NA                           | NA                           |
| R01_cb4989_c12/f2p0/468      | R01_cb4989_c12/f2p0/468     | R01_cb4989_c12/f2p0/468      | R01_cb4989_c12/f2p0/468      | NA                           |
| R01_cb8564_c69121/f2p0/1984  | NA                          | R01_cb8564_c69121/f2p0/1984  | R01_cb8564_c69121/f2p0/1984  | R01_cb8564_c69121/f2p0/1984  |
| R01_cb5220_c3/f1p0/3151      | R01_cb5220_c3/f1p0/3151     | R01_cb5220_c3/f1p0/3151      | R01_cb5220_c3/f1p0/3151      | R01_cb5220_c3/f1p0/3151      |
| R01_cb3471_c7/f1p0/1188      | NA                          | NA                           | NA                           | R01_cb3471_c7/f1p0/1188      |
| R01_cb8564_c2878/f1p0/2627   | NA                          | NA                           | R01_cb8564_c2878/f1p0/2627   | NA                           |
| R01_cb10076_c8/f1p0/1357     | NA                          | R01_cb10076_c8/f1p0/1357     | NA                           | NA                           |
| R01_cb8564_c113229/f1p0/2279 | NA                          | R01_cb8564_c113229/f1p0/2279 | R01_cb8564_c113229/f1p0/2279 | R01_cb8564_c113229/f1p0/2279 |
| R01_cb12223_c0/f2p0/699      | R01_cb12223_c0/f2p0/699     | R01_cb12223_c0/f2p0/699      | R01_cb12223_c0/f2p0/699      | R01_cb12223_c0/f2p0/699      |
| R01_cb10648_c5/f1p1/798      | NA                          | R01_cb10648_c5/f1p1/798      | NA                           | NA                           |
| R01_cb10851_c4/f1p1/759      | R01_cb10851_c4/f1p1/759     | NA                           | R01_cb10851_c4/f1p1/759      | R01_cb10851_c4/f1p1/759      |
| R01_cb14627_c2/f2p0/735      | NA                          | NA                           | R01_cb14627_c2/f2p0/735      | R01_cb14627_c2/f2p0/735      |
| R01_cb13422_c1/f1p0/918      | NA                          | R01_cb13422_c1/f1p0/918      | R01_cb13422_c1/f1p0/918      | R01_cb13422_c1/f1p0/918      |
| R01_cb8564_c14045/f1p0/3389  | NA                          | R01_cb8564_c14045/f1p0/3389  | NA                           | NA                           |
| R01_cb11072_c3/f3p0/468      | R01_cb11072_c3/f3p0/468     | R01_cb11072_c3/f3p0/468      | NA                           | NA                           |
| R01_cb14648_c5/f1p0/584      | NA                          | R01_cb14648_c5/f1p0/584      | NA                           | NA                           |

|                             |                            |                             |                             |                             |
|-----------------------------|----------------------------|-----------------------------|-----------------------------|-----------------------------|
| R01_cb10017_c138/f1p0/867   | NA                         | R01_cb10017_c138/f1p0/867   | NA                          | NA                          |
| R01_cb5943_c3/f1p0/2903     | NA                         | NA                          | NA                          | R01_cb5943_c3/f1p0/2903     |
| R01_cb8564_c1649/f1p0/2395  | NA                         | R01_cb8564_c1649/f1p0/2395  | NA                          | NA                          |
| R01_cb10269_c4/f1p0/2253    | NA                         | R01_cb10269_c4/f1p0/2253    | NA                          | NA                          |
| R01_cb8294_c1/f1p0/2409     | NA                         | R01_cb8294_c1/f1p0/2409     | NA                          | NA                          |
| R01_cb499_c90/f1p2/1505     | NA                         | R01_cb499_c90/f1p2/1505     | NA                          | NA                          |
| R01_cb8564_c20527/f1p0/2861 | NA                         | R01_cb8564_c20527/f1p0/2861 | R01_cb8564_c20527/f1p0/2861 | R01_cb8564_c20527/f1p0/2861 |
| R01_cb4529_c8/f1p0/838      | NA                         | R01_cb4529_c8/f1p0/838      | NA                          | NA                          |
| R01_cb8564_c77303/f1p0/1949 | NA                         | NA                          | NA                          | R01_cb8564_c77303/f1p0/1949 |
| R01_cb4925_c4/f2p0/3222     | NA                         | NA                          | NA                          | R01_cb4925_c4/f2p0/3222     |
| R01_cb8564_c84562/f2p0/4125 | NA                         | NA                          | NA                          | R01_cb8564_c84562/f2p0/4125 |
| R01_cb1847_c1/f1p0/4156     | NA                         | NA                          | NA                          | R01_cb1847_c1/f1p0/4156     |
| R01_cb18456_c6689/f1p0/903  | NA                         | R01_cb18456_c6689/f1p0/903  | NA                          | NA                          |
| R01_cb18409_c63/f1p0/1703   | NA                         | R01_cb18409_c63/f1p0/1703   | R01_cb18409_c63/f1p0/1703   | R01_cb18409_c63/f1p0/1703   |
| R01_cb13057_c2/f2p0/377     | R01_cb13057_c2/f2p0/377    | R01_cb13057_c2/f2p0/377     | R01_cb13057_c2/f2p0/377     | R01_cb13057_c2/f2p0/377     |
| R01_cb1378_c12/f1p0/805     | R01_cb1378_c12/f1p0/805    | R01_cb1378_c12/f1p0/805     | R01_cb1378_c12/f1p0/805     | R01_cb1378_c12/f1p0/805     |
| R01_cb11629_c4/f1p0/1480    | NA                         | NA                          | NA                          | R01_cb11629_c4/f1p0/1480    |
| R01_cb8084_c9/f1p0/1149     | NA                         | NA                          | NA                          | R01_cb8084_c9/f1p0/1149     |
| R01_cb4637_c10/f1p0/736     | R01_cb4637_c10/f1p0/736    | R01_cb4637_c10/f1p0/736     | NA                          | NA                          |
| R01_cb16888_c11/f4p0/886    | NA                         | NA                          | R01_cb16888_c11/f4p0/886    | R01_cb16888_c11/f4p0/886    |
| R01_cb4917_c3/f1p0/3806     | NA                         | NA                          | NA                          | R01_cb4917_c3/f1p0/3806     |
| R01_cb18456_c5011/f1p0/862  | R01_cb18456_c5011/f1p0/862 | R01_cb18456_c5011/f1p0/862  | NA                          | R01_cb18456_c5011/f1p0/862  |
| R01_cb16005_c3/f1p0/765     | NA                         | R01_cb16005_c3/f1p0/765     | NA                          | NA                          |
| R01_cb12714_c19/f1p0/1877   | NA                         | R01_cb12714_c19/f1p0/1877   | NA                          | NA                          |
| R01_cb8564_c24430/f1p1/2543 | NA                         | R01_cb8564_c24430/f1p1/2543 | NA                          | NA                          |
| R01_cb17655_c2/f2p0/595     | R01_cb17655_c2/f2p0/595    | R01_cb17655_c2/f2p0/595     | R01_cb17655_c2/f2p0/595     | R01_cb17655_c2/f2p0/595     |

|                             |                             |                             |                             |                             |
|-----------------------------|-----------------------------|-----------------------------|-----------------------------|-----------------------------|
| R01_cb14283_c6/flp0/741     | NA                          | R01_cb14283_c6/flp0/741     | R01_cb14283_c6/flp0/741     | R01_cb14283_c6/flp0/741     |
| R01_cb8486_c6/flp0/1775     | NA                          | R01_cb8486_c6/flp0/1775     | NA                          | NA                          |
| R01_cb18237_c0/flp0/1098    | NA                          | NA                          | NA                          | R01_cb18237_c0/flp0/1098    |
| R01_cb11704_c0/flp0/1063    | NA                          | R01_cb11704_c0/flp0/1063    | NA                          | NA                          |
| R01_cb225_c1/flp0/4907      | NA                          | NA                          | NA                          | R01_cb225_c1/flp0/4907      |
| R01_cb1568_c8/flp0/1980     | NA                          | NA                          | NA                          | R01_cb1568_c8/flp0/1980     |
| R01_cb6069_c5/flp0/2802     | NA                          | NA                          | NA                          | R01_cb6069_c5/flp0/2802     |
| R01_cb6211_c55/flp0/2825    | NA                          | R01_cb6211_c55/flp0/2825    | NA                          | NA                          |
| R01_cb10118_c4/flp0/693     | NA                          | R01_cb10118_c4/flp0/693     | NA                          | NA                          |
| R01_cb9465_c1/flp1/2022     | NA                          | R01_cb9465_c1/flp1/2022     | NA                          | NA                          |
| R01_cb11397_c2/flp1/596     | NA                          | R01_cb11397_c2/flp1/596     | NA                          | NA                          |
| R01_cb18456_c7647/flp1/861  | NA                          | R01_cb18456_c7647/flp1/861  | NA                          | NA                          |
| R01_cb3838_c17/flp0/2585    | NA                          | R01_cb3838_c17/flp0/2585    | NA                          | NA                          |
| R01_cb16303_c5/flp0/308     | R01_cb16303_c5/flp0/308     | R01_cb16303_c5/flp0/308     | R01_cb16303_c5/flp0/308     | R01_cb16303_c5/flp0/308     |
| R01_cb8564_c20604/flp0/4741 | NA                          | R01_cb8564_c20604/flp0/4741 | R01_cb8564_c20604/flp0/4741 | R01_cb8564_c20604/flp0/4741 |
| R01_cb8564_c89072/flp0/1906 | NA                          | NA                          | NA                          | R01_cb8564_c89072/flp0/1906 |
| R01_cb8564_c79156/flp0/3394 | R01_cb8564_c79156/flp0/3394 | R01_cb8564_c79156/flp0/3394 | R01_cb8564_c79156/flp0/3394 | R01_cb8564_c79156/flp0/3394 |
| R01_cb10293_c12/flp0/1815   | R01_cb10293_c12/flp0/1815   | R01_cb10293_c12/flp0/1815   | R01_cb10293_c12/flp0/1815   | R01_cb10293_c12/flp0/1815   |
| R01_cb8564_c15535/flp0/1921 | NA                          | R01_cb8564_c15535/flp0/1921 | NA                          | NA                          |
| R01_cb15911_c0/flp0/1558    | NA                          | R01_cb15911_c0/flp0/1558    | NA                          | R01_cb15911_c0/flp0/1558    |
| R01_cb18370_c0/flp0/668     | NA                          | NA                          | R01_cb18370_c0/flp0/668     | R01_cb18370_c0/flp0/668     |
| R01_cb8234_c13/flp0/2314    | NA                          | NA                          | NA                          | R01_cb8234_c13/flp0/2314    |
| R01_cb15353_c3/flp0/1129    | NA                          | NA                          | NA                          | R01_cb15353_c3/flp0/1129    |
| R01_cb8564_c3724/flp0/2996  | R01_cb8564_c3724/flp0/2996  | R01_cb8564_c3724/flp0/2996  | R01_cb8564_c3724/flp0/2996  | NA                          |
| R01_cb11204_c3/flp0/889     | NA                          | R01_cb11204_c3/flp0/889     | NA                          | R01_cb11204_c3/flp0/889     |

|                              |                             |                              |                             |                             |
|------------------------------|-----------------------------|------------------------------|-----------------------------|-----------------------------|
| R01_cb8564_c3745/flp0/3841   | NA                          | R01_cb8564_c3745/flp0/3841   | R01_cb8564_c3745/flp0/3841  | R01_cb8564_c3745/flp0/3841  |
| R01_cb8564_c78656/flp0/2329  | R01_cb8564_c78656/flp0/2329 | R01_cb8564_c78656/flp0/2329  | R01_cb8564_c78656/flp0/2329 | R01_cb8564_c78656/flp0/2329 |
| R01_cb7875_c1/flp0/2030      | NA                          | NA                           | NA                          | R01_cb7875_c1/flp0/2030     |
| R01_cb8564_c162316/flp1/2224 | NA                          | R01_cb8564_c162316/flp1/2224 | NA                          | NA                          |
| R01_cb2985_c4/flp0/3241      | NA                          | NA                           | NA                          | R01_cb2985_c4/flp0/3241     |
| R01_cb1993_c8/flp1/3209      | NA                          | NA                           | NA                          | R01_cb1993_c8/flp1/3209     |
| R01_cb6158_c2/flp0/1006      | NA                          | NA                           | NA                          | R01_cb6158_c2/flp0/1006     |
| R01_cb8478_c1/f6p0/2460      | NA                          | NA                           | NA                          | R01_cb8478_c1/f6p0/2460     |
| R01_cb8564_c1110/flp0/2070   | NA                          | NA                           | NA                          | R01_cb8564_c1110/flp0/2070  |
| R01_cb11868_c0/f3p0/349      | NA                          | R01_cb11868_c0/f3p0/349      | R01_cb11868_c0/f3p0/349     | R01_cb11868_c0/f3p0/349     |
| R01_cb17973_c54/flp0/550     | R01_cb17973_c54/flp0/550    | R01_cb17973_c54/flp0/550     | R01_cb17973_c54/flp0/550    | R01_cb17973_c54/flp0/550    |
| R01_cb6570_c2/flp0/2836      | NA                          | R01_cb6570_c2/flp0/2836      | R01_cb6570_c2/flp0/2836     | R01_cb6570_c2/flp0/2836     |
| R01_cb10273_c2/flp1/2244     | NA                          | R01_cb10273_c2/flp1/2244     | NA                          | NA                          |
| R01_cb4504_c0/f8p0/3277      | NA                          | NA                           | NA                          | R01_cb4504_c0/f8p0/3277     |
| R01_cb8564_c19092/flp0/2838  | NA                          | R01_cb8564_c19092/flp0/2838  | NA                          | NA                          |
| R01_cb12301_c133/flp0/937    | NA                          | R01_cb12301_c133/flp0/937    | NA                          | NA                          |
| R01_cb17131_c0/f3p0/545      | NA                          | R01_cb17131_c0/f3p0/545      | NA                          | NA                          |
| R01_cb7103_c2/f2p0/2787      | R01_cb7103_c2/f2p0/2787     | R01_cb7103_c2/f2p0/2787      | NA                          | R01_cb7103_c2/f2p0/2787     |
| R01_cb15053_c7/flp0/724      | NA                          | R01_cb15053_c7/flp0/724      | R01_cb15053_c7/flp0/724     | NA                          |
| R01_cb11308_c0/flp0/955      | NA                          | R01_cb11308_c0/flp0/955      | NA                          | R01_cb11308_c0/flp0/955     |
| R01_cb17678_c0/flp0/431      | NA                          | R01_cb17678_c0/flp0/431      | R01_cb17678_c0/flp0/431     | R01_cb17678_c0/flp0/431     |
| R01_cb4490_c18/flp0/2440     | NA                          | NA                           | NA                          | R01_cb4490_c18/flp0/2440    |
| R01_cb8564_c99051/flp7/4137  | NA                          | R01_cb8564_c99051/flp7/4137  | R01_cb8564_c99051/flp7/4137 | R01_cb8564_c99051/flp7/4137 |
| R01_cb680_c1/flp0/4121       | NA                          | R01_cb680_c1/flp0/4121       | NA                          | NA                          |

|                             |                          |                             |                             |                             |
|-----------------------------|--------------------------|-----------------------------|-----------------------------|-----------------------------|
| R01_cb8564_c13973/flp0/2791 | NA                       | R01_cb8564_c13973/flp0/2791 | R01_cb8564_c13973/flp0/2791 | R01_cb8564_c13973/flp0/2791 |
| R01_cb11912_c1/flp0/1837    | NA                       | NA                          | NA                          | R01_cb11912_c1/flp0/1837    |
| R01_cb8564_c89948/flp0/2252 | NA                       | NA                          | NA                          | R01_cb8564_c89948/flp0/2252 |
| R01_cb8564_c24444/flp0/4497 | NA                       | NA                          | NA                          | R01_cb8564_c24444/flp0/4497 |
| R01_cb10755_c3/flp0/2369    | R01_cb10755_c3/flp0/2369 | R01_cb10755_c3/flp0/2369    | NA                          | NA                          |
| R01_cb4489_c12/flp0/1870    | NA                       | R01_cb4489_c12/flp0/1870    | NA                          | R01_cb4489_c12/flp0/1870    |
| R01_cb15805_c2/flp0/632     | NA                       | NA                          | NA                          | R01_cb15805_c2/flp0/632     |
| R01_cb8564_c21412/flp1/3294 | NA                       | R01_cb8564_c21412/flp1/3294 | NA                          | NA                          |
| R01_cb3438_c28/flp0/2170    | R01_cb3438_c28/flp0/2170 | R01_cb3438_c28/flp0/2170    | R01_cb3438_c28/flp0/2170    | R01_cb3438_c28/flp0/2170    |
| R01_cb4953_c11/flp0/444     | R01_cb4953_c11/flp0/444  | R01_cb4953_c11/flp0/444     | NA                          | R01_cb4953_c11/flp0/444     |
| R01_cb16858_c0/flp0/762     | NA                       | R01_cb16858_c0/flp0/762     | NA                          | R01_cb16858_c0/flp0/762     |
| R01_cb10881_c2/flp0/2250    | NA                       | R01_cb10881_c2/flp0/2250    | R01_cb10881_c2/flp0/2250    | R01_cb10881_c2/flp0/2250    |
| R01_cb17493_c0/flp0/1641    | R01_cb17493_c0/flp0/1641 | NA                          | NA                          | NA                          |
| R01_cb11081_c7/flp0/550     | NA                       | R01_cb11081_c7/flp0/550     | R01_cb11081_c7/flp0/550     | R01_cb11081_c7/flp0/550     |
| R01_cb7945_c4/flp0/1053     | NA                       | R01_cb7945_c4/flp0/1053     | NA                          | R01_cb7945_c4/flp0/1053     |
| R01_cb16250_c1/flp0/430     | R01_cb16250_c1/flp0/430  | R01_cb16250_c1/flp0/430     | R01_cb16250_c1/flp0/430     | R01_cb16250_c1/flp0/430     |
| R01_cb4321_c3/flp0/2323     | NA                       | R01_cb4321_c3/flp0/2323     | NA                          | NA                          |
| R01_cb18456_c5106/flp1/856  | NA                       | R01_cb18456_c5106/flp1/856  | NA                          | NA                          |
| R01_cb11065_c4/flp0/1358    | NA                       | NA                          | NA                          | R01_cb11065_c4/flp0/1358    |
| R01_cb9472_c0/flp0/2145     | NA                       | NA                          | NA                          | R01_cb9472_c0/flp0/2145     |
| R01_cb2936_c8/flp0/2509     | NA                       | R01_cb2936_c8/flp0/2509     | NA                          | NA                          |
| R01_cb18287_c7/flp0/408     | R01_cb18287_c7/flp0/408  | R01_cb18287_c7/flp0/408     | R01_cb18287_c7/flp0/408     | R01_cb18287_c7/flp0/408     |
| R01_cb10646_c0/flp0/998     | NA                       | NA                          | R01_cb10646_c0/flp0/998     | R01_cb10646_c0/flp0/998     |
| R01_cb16552_c3/flp0/1286    | NA                       | NA                          | NA                          | R01_cb16552_c3/flp0/1286    |
| R01_cb11212_c0/fl15p0/720   | NA                       | R01_cb11212_c0/fl15p0/720   | NA                          | NA                          |
| R01_cb735_c1/flp1/4165      | NA                       | NA                          | NA                          | R01_cb735_c1/flp1/4165      |



|                                  |                            |                                  |                            |                                  |
|----------------------------------|----------------------------|----------------------------------|----------------------------|----------------------------------|
| R01_cb8564_c22083/flp0/4374      | NA                         | NA                               | NA                         | R01_cb8564_c22083/flp0/4374      |
| R01_cb10064_c3/flp0/1626         | R01_cb10064_c3/flp0/1626   | R01_cb10064_c3/flp0/1626         | R01_cb10064_c3/flp0/1626   | R01_cb10064_c3/flp0/1626         |
| R01_cb8564_c117585/flp0/239<br>1 | NA                         | R01_cb8564_c117585/flp0/239<br>1 | NA                         | R01_cb8564_c117585/flp0/239<br>1 |
| R01_cb7537_c8/flp0/2129          | NA                         | NA                               | NA                         | R01_cb7537_c8/flp0/2129          |
| R01_cb5471_c7/flp0/3091          | NA                         | NA                               | NA                         | R01_cb5471_c7/flp0/3091          |
| R01_cb2027_c8/flp0/3051          | NA                         | NA                               | R01_cb2027_c8/flp0/3051    | NA                               |
| R01_cb1523_c13/flp0/3636         | R01_cb1523_c13/flp0/3636   | R01_cb1523_c13/flp0/3636         | R01_cb1523_c13/flp0/3636   | R01_cb1523_c13/flp0/3636         |
| R01_cb538_c7/flp0/3352           | NA                         | R01_cb538_c7/flp0/3352           | NA                         | NA                               |
| R01_cb17997_c9/flp0/1018         | NA                         | NA                               | NA                         | R01_cb17997_c9/flp0/1018         |
| R01_cb8564_c77748/flp0/4086      | NA                         | R01_cb8564_c77748/flp0/4086      | NA                         | NA                               |
| R01_cb17384_c2/flp0/1560         | NA                         | NA                               | NA                         | R01_cb17384_c2/flp0/1560         |
| R01_cb18456_c5923/flp0/419       | R01_cb18456_c5923/flp0/419 | R01_cb18456_c5923/flp0/419       | R01_cb18456_c5923/flp0/419 | R01_cb18456_c5923/flp0/419       |
| R01_cb17635_c1/flp0/526          | R01_cb17635_c1/flp0/526    | R01_cb17635_c1/flp0/526          | R01_cb17635_c1/flp0/526    | R01_cb17635_c1/flp0/526          |
| R01_cb11869_c11/flp1/840         | R01_cb11869_c11/flp1/840   | R01_cb11869_c11/flp1/840         | NA                         | NA                               |
| R01_cb6377_c1/flp0/2545          | NA                         | NA                               | NA                         | R01_cb6377_c1/flp0/2545          |
| R01_cb3558_c11/flp0/2820         | NA                         | NA                               | NA                         | R01_cb3558_c11/flp0/2820         |
| R01_cb8564_c3281/flp0/2701       | NA                         | R01_cb8564_c3281/flp0/2701       | NA                         | NA                               |
| R01_cb18456_c7347/flp0/605       | R01_cb18456_c7347/flp0/605 | R01_cb18456_c7347/flp0/605       | R01_cb18456_c7347/flp0/605 | R01_cb18456_c7347/flp0/605       |
| R01_cb9485_c1/flp0/2070          | NA                         | R01_cb9485_c1/flp0/2070          | NA                         | R01_cb9485_c1/flp0/2070          |
| R01_cb10029_c1108/flp3/887       | NA                         | R01_cb10029_c1108/flp3/887       | NA                         | NA                               |
| R01_cb3426_c17/flp0/3178         | NA                         | NA                               | NA                         | R01_cb3426_c17/flp0/3178         |
| R01_cb8085_c14/flp0/2012         | NA                         | R01_cb8085_c14/flp0/2012         | NA                         | NA                               |
| R01_cb18587_c0/flp0/1391         | NA                         | R01_cb18587_c0/flp0/1391         | NA                         | R01_cb18587_c0/flp0/1391         |
| R01_cb8564_c20383/flp1/2928      | NA                         | NA                               | NA                         | R01_cb8564_c20383/flp1/2928      |
| R01_cb5324_c3/flp0/820           | NA                         | R01_cb5324_c3/flp0/820           | R01_cb5324_c3/flp0/820     | R01_cb5324_c3/flp0/820           |

|                             |                         |                             |                             |                             |
|-----------------------------|-------------------------|-----------------------------|-----------------------------|-----------------------------|
| R01_cb15714_c0/f6p0/560     | NA                      | R01_cb15714_c0/f6p0/560     | NA                          | NA                          |
| R01_cb17084_c4/f1p0/716     | R01_cb17084_c4/f1p0/716 | R01_cb17084_c4/f1p0/716     | NA                          | NA                          |
| R01_cb7027_c0/f1p0/2718     | R01_cb7027_c0/f1p0/2718 | R01_cb7027_c0/f1p0/2718     | R01_cb7027_c0/f1p0/2718     | R01_cb7027_c0/f1p0/2718     |
| R01_cb16981_c12/f1p0/835    | NA                      | NA                          | NA                          | R01_cb16981_c12/f1p0/835    |
| R01_cb1437_c0/f2p1/3930     | NA                      | NA                          | NA                          | R01_cb1437_c0/f2p1/3930     |
| R01_cb8564_c20780/f1p0/3653 | NA                      | R01_cb8564_c20780/f1p0/3653 | NA                          | NA                          |
| R01_cb3939_c20/f1p0/2304    | NA                      | R01_cb3939_c20/f1p0/2304    | NA                          | R01_cb3939_c20/f1p0/2304    |
| R01_cb13318_c3/f1p0/1520    | NA                      | NA                          | NA                          | R01_cb13318_c3/f1p0/1520    |
| R01_cb8564_c52855/f1p0/3194 | NA                      | NA                          | R01_cb8564_c52855/f1p0/3194 | NA                          |
| R01_cb10024_c418/f1p0/638   | NA                      | R01_cb10024_c418/f1p0/638   | R01_cb10024_c418/f1p0/638   | NA                          |
| R01_cb18433_c0/f1p0/553     | R01_cb18433_c0/f1p0/553 | R01_cb18433_c0/f1p0/553     | NA                          | R01_cb18433_c0/f1p0/553     |
| R01_cb11816_c0/f1p0/1374    | NA                      | NA                          | NA                          | R01_cb11816_c0/f1p0/1374    |
| R01_cb18372_c8/f1p0/2774    | NA                      | R01_cb18372_c8/f1p0/2774    | NA                          | NA                          |
| R01_cb4799_c6/f1p2/2506     | NA                      | R01_cb4799_c6/f1p2/2506     | NA                          | NA                          |
| R01_cb11723_c4/f1p0/3330    | NA                      | NA                          | NA                          | R01_cb11723_c4/f1p0/3330    |
| R01_cb8564_c2130/f1p0/2044  | NA                      | R01_cb8564_c2130/f1p0/2044  | NA                          | NA                          |
| R01_cb17579_c0/f2p0/542     | NA                      | R01_cb17579_c0/f2p0/542     | R01_cb17579_c0/f2p0/542     | R01_cb17579_c0/f2p0/542     |
| R01_cb11815_c0/f1p0/506     | NA                      | R01_cb11815_c0/f1p0/506     | NA                          | R01_cb11815_c0/f1p0/506     |
| R01_cb15951_c8/f1p0/653     | NA                      | R01_cb15951_c8/f1p0/653     | R01_cb15951_c8/f1p0/653     | R01_cb15951_c8/f1p0/653     |
| R01_cb15287_c1/f1p0/459     | NA                      | R01_cb15287_c1/f1p0/459     | NA                          | R01_cb15287_c1/f1p0/459     |
| R01_cb8970_c0/f1p0/2222     | R01_cb8970_c0/f1p0/2222 | R01_cb8970_c0/f1p0/2222     | R01_cb8970_c0/f1p0/2222     | R01_cb8970_c0/f1p0/2222     |
| R01_cb11353_c0/f2p0/814     | NA                      | R01_cb11353_c0/f2p0/814     | NA                          | R01_cb11353_c0/f2p0/814     |
| R01_cb1860_c12/f1p3/2509    | NA                      | NA                          | NA                          | R01_cb1860_c12/f1p3/2509    |
| R01_cb7014_c10/f1p0/639     | NA                      | R01_cb7014_c10/f1p0/639     | NA                          | R01_cb7014_c10/f1p0/639     |
| R01_cb10810_c0/f2p1/815     | NA                      | NA                          | NA                          | R01_cb10810_c0/f2p1/815     |
| R01_cb8564_c69375/f2p0/2764 | NA                      | R01_cb8564_c69375/f2p0/2764 | NA                          | R01_cb8564_c69375/f2p0/2764 |

|                              |                         |                              |                         |                             |
|------------------------------|-------------------------|------------------------------|-------------------------|-----------------------------|
| R01_cb4465_c3/flp0/2359      | NA                      | R01_cb4465_c3/flp0/2359      | NA                      | R01_cb4465_c3/flp0/2359     |
| R01_cb2765_c3/flp0/3628      | NA                      | NA                           | NA                      | R01_cb2765_c3/flp0/3628     |
| R01_cb11141_c7/flp0/1284     | NA                      | NA                           | NA                      | R01_cb11141_c7/flp0/1284    |
| R01_cb8564_c111231/flp1/2676 | NA                      | R01_cb8564_c111231/flp1/2676 | NA                      | NA                          |
| R01_cb8564_c19217/flp0/2062  | NA                      | R01_cb8564_c19217/flp0/2062  | NA                      | NA                          |
| R01_cb3757_c3/flp0/3313      | NA                      | NA                           | NA                      | R01_cb3757_c3/flp0/3313     |
| R01_cb5659_c43/flp0/2132     | NA                      | NA                           | NA                      | R01_cb5659_c43/flp0/2132    |
| R01_cb8564_c51248/flp0/2265  | NA                      | R01_cb8564_c51248/flp0/2265  | NA                      | R01_cb8564_c51248/flp0/2265 |
| R01_cb16487_c1/flp0/546      | R01_cb16487_c1/flp0/546 | R01_cb16487_c1/flp0/546      | NA                      | R01_cb16487_c1/flp0/546     |
| R01_cb2378_c24/flp0/3289     | NA                      | NA                           | NA                      | R01_cb2378_c24/flp0/3289    |
| R01_cb7806_c4/flp0/1821      | NA                      | R01_cb7806_c4/flp0/1821      | R01_cb7806_c4/flp0/1821 | R01_cb7806_c4/flp0/1821     |
| R01_cb14547_c17/flp1/777     | NA                      | R01_cb14547_c17/flp1/777     | NA                      | NA                          |
| R01_cb8097_c9/flp0/3499      | NA                      | R01_cb8097_c9/flp0/3499      | NA                      | NA                          |
| R01_cb17548_c0/flp0/840      | NA                      | R01_cb17548_c0/flp0/840      | R01_cb17548_c0/flp0/840 | R01_cb17548_c0/flp0/840     |
| R01_cb12696_c9/flp0/788      | R01_cb12696_c9/flp0/788 | R01_cb12696_c9/flp0/788      | NA                      | NA                          |
| R01_cb5259_c7/flp0/3967      | NA                      | R01_cb5259_c7/flp0/3967      | R01_cb5259_c7/flp0/3967 | R01_cb5259_c7/flp0/3967     |
| R01_cb4169_c5/flp0/3737      | NA                      | R01_cb4169_c5/flp0/3737      | R01_cb4169_c5/flp0/3737 | NA                          |
| R01_cb352_c8/flp0/1740       | NA                      | NA                           | NA                      | R01_cb352_c8/flp0/1740      |
| R01_cb11533_c0/flp0/809      | NA                      | R01_cb11533_c0/flp0/809      | R01_cb11533_c0/flp0/809 | R01_cb11533_c0/flp0/809     |
| R01_cb4123_c105/flp1/1055    | NA                      | R01_cb4123_c105/flp1/1055    | NA                      | NA                          |
| R01_cb8409_c4/flp0/2044      | NA                      | NA                           | NA                      | R01_cb8409_c4/flp0/2044     |
| R01_cb18456_c6263/flp0/787   | NA                      | R01_cb18456_c6263/flp0/787   | NA                      | R01_cb18456_c6263/flp0/787  |
| R01_cb12156_c2/flp1/692      | R01_cb12156_c2/flp1/692 | R01_cb12156_c2/flp1/692      | NA                      | NA                          |
| R01_cb7632_c28/flp0/541      | R01_cb7632_c28/flp0/541 | R01_cb7632_c28/flp0/541      | R01_cb7632_c28/flp0/541 | R01_cb7632_c28/flp0/541     |
| R01_cb17792_c1/flp0/1110     | NA                      | NA                           | NA                      | R01_cb17792_c1/flp0/1110    |

|                                  |                            |                                  |                             |                                  |
|----------------------------------|----------------------------|----------------------------------|-----------------------------|----------------------------------|
| R01_cb18456_c5455/flp0/1774      | NA                         | R01_cb18456_c5455/flp0/1774      | NA                          | NA                               |
| R01_cb10206_c17/flp0/1410        | NA                         | R01_cb10206_c17/flp0/1410        | NA                          | NA                               |
| R01_cb8564_c18289/f3p1/3147      | NA                         | R01_cb8564_c18289/f3p1/3147      | R01_cb8564_c18289/f3p1/3147 | NA                               |
| R01_cb13933_c0/flp0/1314         | NA                         | R01_cb13933_c0/flp0/1314         | NA                          | NA                               |
| R01_cb8564_c1826/flp1/4529       | NA                         | R01_cb8564_c1826/flp1/4529       | NA                          | NA                               |
| R01_cb14469_c6/f2p2/577          | NA                         | R01_cb14469_c6/f2p2/577          | R01_cb14469_c6/f2p2/577     | R01_cb14469_c6/f2p2/577          |
| R01_cb9797_c37/flp0/2407         | NA                         | R01_cb9797_c37/flp0/2407         | NA                          | NA                               |
| R01_cb8564_c122970/flp0/377<br>1 | NA                         | R01_cb8564_c122970/flp0/377<br>1 | NA                          | R01_cb8564_c122970/flp0/377<br>1 |
| R01_cb8564_c90782/flp0/2732      | NA                         | NA                               | NA                          | R01_cb8564_c90782/flp0/2732      |
| R01_cb8122_c3/flp0/3468          | NA                         | NA                               | NA                          | R01_cb8122_c3/flp0/3468          |
| R01_cb658_c3/flp0/2803           | NA                         | NA                               | NA                          | R01_cb658_c3/flp0/2803           |
| R01_cb7584_c14/flp0/1402         | NA                         | R01_cb7584_c14/flp0/1402         | NA                          | NA                               |
| R01_cb8564_c23795/flp0/4903      | NA                         | R01_cb8564_c23795/flp0/4903      | NA                          | NA                               |
| R01_cb2138_c2/flp1/4037          | NA                         | R01_cb2138_c2/flp1/4037          | NA                          | NA                               |
| R01_cb13867_c14/f3p1/654         | NA                         | NA                               | NA                          | R01_cb13867_c14/f3p1/654         |
| R01_cb7714_c6/flp1/2387          | NA                         | NA                               | NA                          | R01_cb7714_c6/flp1/2387          |
| R01_cb10562_c1/flp0/2694         | NA                         | NA                               | R01_cb10562_c1/flp0/2694    | R01_cb10562_c1/flp0/2694         |
| R01_cb16645_c53/flp0/926         | NA                         | R01_cb16645_c53/flp0/926         | NA                          | NA                               |
| R01_cb8564_c1548/flp0/2907       | R01_cb8564_c1548/flp0/2907 | R01_cb8564_c1548/flp0/2907       | R01_cb8564_c1548/flp0/2907  | R01_cb8564_c1548/flp0/2907       |
| R01_cb11379_c0/flp0/867          | NA                         | R01_cb11379_c0/flp0/867          | NA                          | R01_cb11379_c0/flp0/867          |
| R01_cb12328_c7/flp0/1568         | NA                         | NA                               | NA                          | R01_cb12328_c7/flp0/1568         |
| R01_cb15600_c1/flp0/877          | NA                         | NA                               | NA                          | R01_cb15600_c1/flp0/877          |
| R01_cb8564_c5054/flp0/2981       | NA                         | R01_cb8564_c5054/flp0/2981       | NA                          | NA                               |
| R01_cb9960_c2/flp0/1993          | NA                         | NA                               | NA                          | R01_cb9960_c2/flp0/1993          |
| R01_cb8564_c89241/flp0/2497      | NA                         | NA                               | NA                          | R01_cb8564_c89241/flp0/2497      |

|                              |                          |                              |                             |                              |
|------------------------------|--------------------------|------------------------------|-----------------------------|------------------------------|
| R01_cb8564_c69326/f4p0/2439  | NA                       | R01_cb8564_c69326/f4p0/2439  | R01_cb8564_c69326/f4p0/2439 | R01_cb8564_c69326/f4p0/2439  |
| R01_cb15671_c1/f1p0/1106     | NA                       | R01_cb15671_c1/f1p0/1106     | NA                          | R01_cb15671_c1/f1p0/1106     |
| R01_cb7695_c1/f1p0/2000      | NA                       | NA                           | NA                          | R01_cb7695_c1/f1p0/2000      |
| R01_cb8564_c118917/f1p0/2553 | NA                       | R01_cb8564_c118917/f1p0/2553 | NA                          | NA                           |
| R01_cb12003_c105/f1p0/926    | NA                       | R01_cb12003_c105/f1p0/926    | NA                          | NA                           |
| R01_cb14107_c6/f1p0/1325     | NA                       | NA                           | R01_cb14107_c6/f1p0/1325    | R01_cb14107_c6/f1p0/1325     |
| R01_cb1835_c4/f1p0/3465      | NA                       | NA                           | NA                          | R01_cb1835_c4/f1p0/3465      |
| R01_cb10132_c24/f1p1/1035    | NA                       | R01_cb10132_c24/f1p1/1035    | NA                          | NA                           |
| R01_cb8564_c18065/f1p0/3238  | NA                       | NA                           | NA                          | R01_cb8564_c18065/f1p0/3238  |
| R01_cb18456_c2262/f1p0/595   | NA                       | R01_cb18456_c2262/f1p0/595   | R01_cb18456_c2262/f1p0/595  | R01_cb18456_c2262/f1p0/595   |
| R01_cb10346_c1/f1p0/3723     | NA                       | R01_cb10346_c1/f1p0/3723     | NA                          | NA                           |
| R01_cb17572_c0/f3p0/786      | NA                       | NA                           | NA                          | R01_cb17572_c0/f3p0/786      |
| R01_cb6253_c3/f1p0/452       | R01_cb6253_c3/f1p0/452   | R01_cb6253_c3/f1p0/452       | R01_cb6253_c3/f1p0/452      | R01_cb6253_c3/f1p0/452       |
| R01_cb4185_c2/f1p0/2697      | NA                       | NA                           | NA                          | R01_cb4185_c2/f1p0/2697      |
| R01_cb8564_c107268/f7p1/3924 | NA                       | NA                           | NA                          | R01_cb8564_c107268/f7p1/3924 |
| R01_cb13205_c7/f1p0/1529     | R01_cb13205_c7/f1p0/1529 | R01_cb13205_c7/f1p0/1529     | NA                          | NA                           |
| R01_cb8564_c16218/f1p0/3279  | NA                       | R01_cb8564_c16218/f1p0/3279  | NA                          | NA                           |
| R01_cb8051_c5/f1p0/2367      | NA                       | NA                           | NA                          | R01_cb8051_c5/f1p0/2367      |
| R01_cb6463_c4/f1p1/2826      | NA                       | NA                           | R01_cb6463_c4/f1p1/2826     | NA                           |
| R01_cb8055_c5/f1p0/625       | NA                       | NA                           | R01_cb8055_c5/f1p0/625      | R01_cb8055_c5/f1p0/625       |
| R01_cb8790_c10/f1p0/605      | NA                       | R01_cb8790_c10/f1p0/605      | NA                          | R01_cb8790_c10/f1p0/605      |
| R01_cb11768_c0/f1p0/738      | R01_cb11768_c0/f1p0/738  | R01_cb11768_c0/f1p0/738      | R01_cb11768_c0/f1p0/738     | R01_cb11768_c0/f1p0/738      |
| R01_cb920_c23/f1p0/1292      | NA                       | NA                           | NA                          | R01_cb920_c23/f1p0/1292      |
| R01_cb7329_c3/f1p0/2137      | NA                       | R01_cb7329_c3/f1p0/2137      | NA                          | NA                           |

|                                  |                          |                                  |                             |                                  |
|----------------------------------|--------------------------|----------------------------------|-----------------------------|----------------------------------|
| R01_cb16066_c5/flp0/649          | R01_cb16066_c5/flp0/649  | R01_cb16066_c5/flp0/649          | R01_cb16066_c5/flp0/649     | R01_cb16066_c5/flp0/649          |
| R01_cb13144_c6/flp0/489          | NA                       | R01_cb13144_c6/flp0/489          | NA                          | R01_cb13144_c6/flp0/489          |
| R01_cb12329_c6/f2p0/910          | NA                       | NA                               | NA                          | R01_cb12329_c6/f2p0/910          |
| R01_cb8564_c128713/flp0/206<br>4 | NA                       | NA                               | NA                          | R01_cb8564_c128713/flp0/206<br>4 |
| R01_cb8564_c16444/f5p10/305<br>3 | NA                       | R01_cb8564_c16444/f5p10/305<br>3 | NA                          | R01_cb8564_c16444/f5p10/305<br>3 |
| R01_cb166_c12/flp0/2392          | NA                       | NA                               | NA                          | R01_cb166_c12/flp0/2392          |
| R01_cb7994_c11/flp0/5318         | R01_cb7994_c11/flp0/5318 | R01_cb7994_c11/flp0/5318         | NA                          | NA                               |
| R01_cb4490_c4/flp0/2857          | R01_cb4490_c4/flp0/2857  | R01_cb4490_c4/flp0/2857          | R01_cb4490_c4/flp0/2857     | R01_cb4490_c4/flp0/2857          |
| R01_cb8564_c49292/flp0/3520      | NA                       | NA                               | NA                          | R01_cb8564_c49292/flp0/3520      |
| R01_cb8564_c54303/flp0/2267      | NA                       | NA                               | NA                          | R01_cb8564_c54303/flp0/2267      |
| R01_cb16669_c0/f2p0/711          | R01_cb16669_c0/f2p0/711  | R01_cb16669_c0/f2p0/711          | R01_cb16669_c0/f2p0/711     | R01_cb16669_c0/f2p0/711          |
| R01_cb4490_c20/flp0/1884         | NA                       | NA                               | NA                          | R01_cb4490_c20/flp0/1884         |
| R01_cb14535_c0/f2p0/1464         | NA                       | NA                               | R01_cb14535_c0/f2p0/1464    | NA                               |
| R01_cb13761_c14/flp0/516         | R01_cb13761_c14/flp0/516 | R01_cb13761_c14/flp0/516         | R01_cb13761_c14/flp0/516    | R01_cb13761_c14/flp0/516         |
| R01_cb8564_c80761/flp0/2138      | NA                       | NA                               | NA                          | R01_cb8564_c80761/flp0/2138      |
| R01_cb11262_c2/flp0/1208         | NA                       | R01_cb11262_c2/flp0/1208         | NA                          | NA                               |
| R01_cb17973_c0/fl4p1/909         | NA                       | NA                               | R01_cb17973_c0/fl4p1/909    | R01_cb17973_c0/fl4p1/909         |
| R01_cb8564_c41755/flp1/3136      | NA                       | R01_cb8564_c41755/flp1/3136      | R01_cb8564_c41755/flp1/3136 | NA                               |
| R01_cb12802_c2/flp0/1315         | R01_cb12802_c2/flp0/1315 | R01_cb12802_c2/flp0/1315         | NA                          | NA                               |
| R01_cb7841_c6/flp0/606           | NA                       | NA                               | NA                          | R01_cb7841_c6/flp0/606           |
| R01_cb9049_c3/flp0/3510          | NA                       | R01_cb9049_c3/flp0/3510          | NA                          | R01_cb9049_c3/flp0/3510          |
| R01_cb16747_c0/f2p0/1469         | NA                       | NA                               | NA                          | R01_cb16747_c0/f2p0/1469         |
| R01_cb16216_c1/flp0/825          | NA                       | NA                               | NA                          | R01_cb16216_c1/flp0/825          |
| R01_cb8937_c1/flp0/2278          | NA                       | NA                               | NA                          | R01_cb8937_c1/flp0/2278          |

|                              |                            |                             |                            |                              |
|------------------------------|----------------------------|-----------------------------|----------------------------|------------------------------|
| R01_cb13795_c1/f2p0/1200     | NA                         | R01_cb13795_c1/f2p0/1200    | NA                         | NA                           |
| R01_cb8564_c24034/f1p0/2193  | NA                         | NA                          | NA                         | R01_cb8564_c24034/f1p0/2193  |
| R01_cb8564_c15651/f1p0/1993  | NA                         | R01_cb8564_c15651/f1p0/1993 | NA                         | NA                           |
| R01_cb12516_c0/f7p0/439      | NA                         | NA                          | NA                         | R01_cb12516_c0/f7p0/439      |
| R01_cb8564_c3177/f1p0/2729   | NA                         | R01_cb8564_c3177/f1p0/2729  | R01_cb8564_c3177/f1p0/2729 | R01_cb8564_c3177/f1p0/2729   |
| R01_cb8040_c14/f1p0/3613     | NA                         | NA                          | R01_cb8040_c14/f1p0/3613   | R01_cb8040_c14/f1p0/3613     |
| R01_cb3575_c10/f1p0/3008     | NA                         | NA                          | NA                         | R01_cb3575_c10/f1p0/3008     |
| R01_cb15360_c5/f1p0/1040     | NA                         | R01_cb15360_c5/f1p0/1040    | NA                         | NA                           |
| R01_cb8087_c12/f1p0/988      | NA                         | R01_cb8087_c12/f1p0/988     | NA                         | NA                           |
| R01_cb15128_c0/f3p0/1626     | NA                         | NA                          | NA                         | R01_cb15128_c0/f3p0/1626     |
| R01_cb8564_c70240/f1p0/3561  | NA                         | R01_cb8564_c70240/f1p0/3561 | NA                         | NA                           |
| R01_cb3381_c41/f1p0/2116     | NA                         | NA                          | NA                         | R01_cb3381_c41/f1p0/2116     |
| R01_cb8564_c117589/f1p0/2950 | NA                         | NA                          | NA                         | R01_cb8564_c117589/f1p0/2950 |
| R01_cb18409_c61/f1p0/702     | R01_cb18409_c61/f1p0/702   | R01_cb18409_c61/f1p0/702    | R01_cb18409_c61/f1p0/702   | R01_cb18409_c61/f1p0/702     |
| R01_cb9047_c3/f1p1/2053      | NA                         | NA                          | NA                         | R01_cb9047_c3/f1p1/2053      |
| R01_cb11287_c0/f1p0/665      | NA                         | NA                          | NA                         | R01_cb11287_c0/f1p0/665      |
| R01_cb10024_c266/f1p2/852    | NA                         | NA                          | R01_cb10024_c266/f1p2/852  | NA                           |
| R01_cb18456_c7551/f1p0/1750  | NA                         | R01_cb18456_c7551/f1p0/1750 | NA                         | NA                           |
| R01_cb15326_c7/f1p0/1319     | R01_cb15326_c7/f1p0/1319   | R01_cb15326_c7/f1p0/1319    | R01_cb15326_c7/f1p0/1319   | R01_cb15326_c7/f1p0/1319     |
| R01_cb16558_c1/f1p0/1622     | R01_cb16558_c1/f1p0/1622   | R01_cb16558_c1/f1p0/1622    | R01_cb16558_c1/f1p0/1622   | R01_cb16558_c1/f1p0/1622     |
| R01_cb15417_c3/f5p0/618      | NA                         | R01_cb15417_c3/f5p0/618     | R01_cb15417_c3/f5p0/618    | NA                           |
| R01_cb13241_c0/f2p0/401      | R01_cb13241_c0/f2p0/401    | R01_cb13241_c0/f2p0/401     | R01_cb13241_c0/f2p0/401    | R01_cb13241_c0/f2p0/401      |
| R01_cb8564_c4104/f1p0/3152   | R01_cb8564_c4104/f1p0/3152 | R01_cb8564_c4104/f1p0/3152  | R01_cb8564_c4104/f1p0/3152 | NA                           |
| R01_cb6922_c5/f1p0/1222      | NA                         | NA                          | NA                         | R01_cb6922_c5/f1p0/1222      |
| R01_cb293_c6/f1p0/3758       | NA                         | NA                          | NA                         | R01_cb293_c6/f1p0/3758       |

|                             |                          |                             |                          |                             |
|-----------------------------|--------------------------|-----------------------------|--------------------------|-----------------------------|
| R01_cb1178_c24/flp0/1294    | NA                       | NA                          | NA                       | R01_cb1178_c24/flp0/1294    |
| R01_cb16387_c13/flp0/1656   | NA                       | NA                          | NA                       | R01_cb16387_c13/flp0/1656   |
| R01_cb5168_c3/flp0/1497     | R01_cb5168_c3/flp0/1497  | R01_cb5168_c3/flp0/1497     | R01_cb5168_c3/flp0/1497  | R01_cb5168_c3/flp0/1497     |
| R01_cb1297_c6/flp2/4121     | NA                       | NA                          | NA                       | R01_cb1297_c6/flp2/4121     |
| R01_cb5533_c167/flp0/872    | NA                       | R01_cb5533_c167/flp0/872    | NA                       | R01_cb5533_c167/flp0/872    |
| R01_cb13938_c10/flp0/1187   | NA                       | NA                          | NA                       | R01_cb13938_c10/flp0/1187   |
| R01_cb12332_c14/flp0/1053   | NA                       | R01_cb12332_c14/flp0/1053   | NA                       | NA                          |
| R01_cb10231_c4/flp0/1464    | NA                       | NA                          | NA                       | R01_cb10231_c4/flp0/1464    |
| R01_cb8564_c83382/flp0/1930 | NA                       | R01_cb8564_c83382/flp0/1930 | NA                       | R01_cb8564_c83382/flp0/1930 |
| R01_cb8564_c22573/flp0/2588 | NA                       | NA                          | NA                       | R01_cb8564_c22573/flp0/2588 |
| R01_cb13181_c14/flp0/1460   | NA                       | R01_cb13181_c14/flp0/1460   | NA                       | NA                          |
| R01_cb6473_c2/flp1/2843     | NA                       | R01_cb6473_c2/flp1/2843     | NA                       | NA                          |
| R01_cb17901_c0/flp0/824     | R01_cb17901_c0/flp0/824  | R01_cb17901_c0/flp0/824     | R01_cb17901_c0/flp0/824  | R01_cb17901_c0/flp0/824     |
| R01_cb7950_c2/flp0/1051     | NA                       | R01_cb7950_c2/flp0/1051     | R01_cb7950_c2/flp0/1051  | R01_cb7950_c2/flp0/1051     |
| R01_cb11649_c0/flp0/1545    | R01_cb11649_c0/flp0/1545 | R01_cb11649_c0/flp0/1545    | NA                       | NA                          |
| R01_cb1106_c4/flp0/2102     | NA                       | NA                          | NA                       | R01_cb1106_c4/flp0/2102     |
| R01_cb14351_c2/flp0/671     | NA                       | NA                          | NA                       | R01_cb14351_c2/flp0/671     |
| R01_cb897_c39/flp0/2987     | NA                       | NA                          | NA                       | R01_cb897_c39/flp0/2987     |
| R01_cb11434_c3/flp0/1539    | NA                       | NA                          | R01_cb11434_c3/flp0/1539 | R01_cb11434_c3/flp0/1539    |
| R01_cb13840_c7/flp0/946     | NA                       | R01_cb13840_c7/flp0/946     | NA                       | NA                          |
| R01_cb13178_c9/f2p0/584     | NA                       | R01_cb13178_c9/f2p0/584     | NA                       | NA                          |
| R01_cb6990_c6/flp0/2668     | NA                       | R01_cb6990_c6/flp0/2668     | NA                       | NA                          |
| R01_cb18456_c6097/flp0/624  | NA                       | R01_cb18456_c6097/flp0/624  | NA                       | R01_cb18456_c6097/flp0/624  |
| R01_cb647_c3/f3p2/1480      | NA                       | NA                          | NA                       | R01_cb647_c3/f3p2/1480      |
| R01_cb18730_c2/flp0/3305    | NA                       | R01_cb18730_c2/flp0/3305    | NA                       | NA                          |
| R01_cb10713_c3/flp0/937     | NA                       | R01_cb10713_c3/flp0/937     | NA                       | NA                          |



|                             |                          |                             |                          |                             |
|-----------------------------|--------------------------|-----------------------------|--------------------------|-----------------------------|
| R01_cb3941_c88/flp0/1953    | NA                       | R01_cb3941_c88/flp0/1953    | NA                       | NA                          |
| R01_cb5690_c6/flp0/648      | NA                       | NA                          | NA                       | R01_cb5690_c6/flp0/648      |
| R01_cb18353_c1/flp0/1301    | NA                       | R01_cb18353_c1/flp0/1301    | R01_cb18353_c1/flp0/1301 | R01_cb18353_c1/flp0/1301    |
| R01_cb2492_c0/flp0/3882     | NA                       | NA                          | NA                       | R01_cb2492_c0/flp0/3882     |
| R01_cb10162_c6/flp1/1718    | NA                       | R01_cb10162_c6/flp1/1718    | NA                       | NA                          |
| R01_cb11447_c2/flp0/1654    | NA                       | R01_cb11447_c2/flp0/1654    | NA                       | R01_cb11447_c2/flp0/1654    |
| R01_cb13938_c21/flp0/836    | NA                       | NA                          | NA                       | R01_cb13938_c21/flp0/836    |
| R01_cb14675_c11/flp0/856    | R01_cb14675_c11/flp0/856 | R01_cb14675_c11/flp0/856    | R01_cb14675_c11/flp0/856 | R01_cb14675_c11/flp0/856    |
| R01_cb8564_c7832/f2p1/2061  | NA                       | NA                          | NA                       | R01_cb8564_c7832/f2p1/2061  |
| R01_cb11583_c1/flp0/2174    | R01_cb11583_c1/flp0/2174 | R01_cb11583_c1/flp0/2174    | R01_cb11583_c1/flp0/2174 | R01_cb11583_c1/flp0/2174    |
| R01_cb302_c23/flp1/1809     | NA                       | NA                          | NA                       | R01_cb302_c23/flp1/1809     |
| R01_cb15293_c1/flp0/760     | NA                       | NA                          | R01_cb15293_c1/flp0/760  | NA                          |
| R01_cb9057_c4/flp0/2149     | NA                       | R01_cb9057_c4/flp0/2149     | NA                       | NA                          |
| R01_cb6406_c56/flp0/3033    | NA                       | R01_cb6406_c56/flp0/3033    | NA                       | R01_cb6406_c56/flp0/3033    |
| R01_cb18456_c1861/flp0/1099 | NA                       | R01_cb18456_c1861/flp0/1099 | NA                       | NA                          |
| R01_cb8478_c68/flp0/1971    | NA                       | R01_cb8478_c68/flp0/1971    | R01_cb8478_c68/flp0/1971 | NA                          |
| R01_cb10133_c4/flp1/1973    | NA                       | NA                          | NA                       | R01_cb10133_c4/flp1/1973    |
| R01_cb8248_c1/flp0/2419     | NA                       | NA                          | R01_cb8248_c1/flp0/2419  | R01_cb8248_c1/flp0/2419     |
| R01_cb15352_c1/f2p2/909     | NA                       | NA                          | NA                       | R01_cb15352_c1/f2p2/909     |
| R01_cb15682_c1/flp0/955     | NA                       | NA                          | NA                       | R01_cb15682_c1/flp0/955     |
| R01_cb8313_c6/flp0/2290     | NA                       | R01_cb8313_c6/flp0/2290     | NA                       | R01_cb8313_c6/flp0/2290     |
| R01_cb3026_c6/flp0/1903     | NA                       | R01_cb3026_c6/flp0/1903     | NA                       | NA                          |
| R01_cb8564_c123944/flp0/281 | NA                       | NA                          | NA                       | R01_cb8564_c123944/flp0/281 |
| 4                           |                          |                             |                          | 4                           |
| R01_cb8111_c0/flp0/2521     | NA                       | NA                          | NA                       | R01_cb8111_c0/flp0/2521     |
| R01_cb1610_c5/flp0/2559     | NA                       | NA                          | NA                       | R01_cb1610_c5/flp0/2559     |

|                             |                             |                             |                             |                             |
|-----------------------------|-----------------------------|-----------------------------|-----------------------------|-----------------------------|
| R01_cb4923_c3/flp0/2890     | NA                          | NA                          | NA                          | R01_cb4923_c3/flp0/2890     |
| R01_cb8564_c51035/f2p2/4216 | NA                          | NA                          | NA                          | R01_cb8564_c51035/f2p2/4216 |
| R01_cb6947_c13/flp0/3658    | NA                          | R01_cb6947_c13/flp0/3658    | NA                          | R01_cb6947_c13/flp0/3658    |
| R01_cb5943_c2/flp0/2980     | NA                          | NA                          | NA                          | R01_cb5943_c2/flp0/2980     |
| R01_cb8564_c114927/flp0/266 | NA                          | R01_cb8564_c114927/flp0/266 | R01_cb8564_c114927/flp0/266 | R01_cb8564_c114927/flp0/266 |
| 6                           | NA                          | 6                           | 6                           | 6                           |
| R01_cb8564_c36706/flp0/2946 | NA                          | NA                          | NA                          | R01_cb8564_c36706/flp0/2946 |
| R01_cb7497_c3/f4p0/2581     | NA                          | NA                          | NA                          | R01_cb7497_c3/f4p0/2581     |
| R01_cb8564_c90245/flp0/2589 | NA                          | R01_cb8564_c90245/flp0/2589 | NA                          | NA                          |
| R01_cb644_c10/flp0/2355     | NA                          | NA                          | NA                          | R01_cb644_c10/flp0/2355     |
| R01_cb18456_c3558/flp0/1170 | NA                          | R01_cb18456_c3558/flp0/1170 | NA                          | NA                          |
| R01_cb618_c10/flp0/1375     | NA                          | NA                          | NA                          | R01_cb618_c10/flp0/1375     |
| R01_cb9343_c1/flp0/2112     | NA                          | R01_cb9343_c1/flp0/2112     | NA                          | NA                          |
| R01_cb18166_c1/flp0/342     | NA                          | R01_cb18166_c1/flp0/342     | NA                          | NA                          |
| R01_cb2042_c3/flp0/2619     | NA                          | R01_cb2042_c3/flp0/2619     | NA                          | R01_cb2042_c3/flp0/2619     |
| R01_cb6923_c34/flp0/1671    | R01_cb6923_c34/flp0/1671    | R01_cb6923_c34/flp0/1671    | R01_cb6923_c34/flp0/1671    | R01_cb6923_c34/flp0/1671    |
| R01_cb8564_c1482/flp0/1923  | NA                          | R01_cb8564_c1482/flp0/1923  | NA                          | NA                          |
| R01_cb1366_c1/flp0/1985     | R01_cb1366_c1/flp0/1985     | R01_cb1366_c1/flp0/1985     | R01_cb1366_c1/flp0/1985     | R01_cb1366_c1/flp0/1985     |
| R01_cb8564_c23283/flp0/2050 | NA                          | R01_cb8564_c23283/flp0/2050 | R01_cb8564_c23283/flp0/2050 | R01_cb8564_c23283/flp0/2050 |
| R01_cb8564_c20135/flp0/3340 | NA                          | NA                          | NA                          | R01_cb8564_c20135/flp0/3340 |
| R01_cb8564_c73656/flp0/2410 | NA                          | R01_cb8564_c73656/flp0/2410 | R01_cb8564_c73656/flp0/2410 | R01_cb8564_c73656/flp0/2410 |
| R01_cb12465_c8/flp0/393     | NA                          | R01_cb12465_c8/flp0/393     | NA                          | NA                          |
| R01_cb8564_c35893/f2p0/2773 | R01_cb8564_c35893/f2p0/2773 | R01_cb8564_c35893/f2p0/2773 | R01_cb8564_c35893/f2p0/2773 | R01_cb8564_c35893/f2p0/2773 |
|                             | 3                           |                             |                             |                             |
| R01_cb8564_c4101/flp0/3275  | NA                          | R01_cb8564_c4101/flp0/3275  | R01_cb8564_c4101/flp0/3275  | NA                          |
| R01_cb3068_c2/flp0/3739     | NA                          | NA                          | NA                          | R01_cb3068_c2/flp0/3739     |

|                              |                          |                              |                          |                             |
|------------------------------|--------------------------|------------------------------|--------------------------|-----------------------------|
| R01_cb1135_c1/flp0/4464      | NA                       | R01_cb1135_c1/flp0/4464      | NA                       | NA                          |
| R01_cb5547_c1/flp0/3078      | NA                       | NA                           | NA                       | R01_cb5547_c1/flp0/3078     |
| R01_cb14715_c4/flp0/516      | R01_cb14715_c4/flp0/516  | R01_cb14715_c4/flp0/516      | R01_cb14715_c4/flp0/516  | R01_cb14715_c4/flp0/516     |
| R01_cb4374_c3/flp0/2557      | NA                       | R01_cb4374_c3/flp0/2557      | NA                       | NA                          |
| R01_cb6642_c0/f3p0/2709      | NA                       | NA                           | NA                       | R01_cb6642_c0/f3p0/2709     |
| R01_cb8564_c21270/flp0/4601  | NA                       | NA                           | NA                       | R01_cb8564_c21270/flp0/4601 |
| R01_cb8564_c86591/flp1/3640  | NA                       | NA                           | NA                       | R01_cb8564_c86591/flp1/3640 |
| R01_cb2352_c11/flp0/2274     | R01_cb2352_c11/flp0/2274 | R01_cb2352_c11/flp0/2274     | R01_cb2352_c11/flp0/2274 | R01_cb2352_c11/flp0/2274    |
| R01_cb8564_c70272/flp0/3476  | NA                       | R01_cb8564_c70272/flp0/3476  | NA                       | NA                          |
| R01_cb3584_c4/flp0/3441      | NA                       | NA                           | NA                       | R01_cb3584_c4/flp0/3441     |
| R01_cb14064_c0/flp0/1684     | NA                       | R01_cb14064_c0/flp0/1684     | NA                       | NA                          |
| R01_cb17514_c0/f3p1/383      | NA                       | R01_cb17514_c0/f3p1/383      | R01_cb17514_c0/f3p1/383  | R01_cb17514_c0/f3p1/383     |
| R01_cb11330_c2/flp0/719      | NA                       | NA                           | NA                       | R01_cb11330_c2/flp0/719     |
| R01_cb12893_c28/flp3/1386    | NA                       | R01_cb12893_c28/flp3/1386    | NA                       | NA                          |
| R01_cb8564_c9750/f2p0/3506   | NA                       | R01_cb8564_c9750/f2p0/3506   | NA                       | NA                          |
| R01_cb8564_c53685/flp1/2562  | NA                       | R01_cb8564_c53685/flp1/2562  | NA                       | NA                          |
| R01_cb11204_c0/f2p0/895      | NA                       | NA                           | NA                       | R01_cb11204_c0/f2p0/895     |
| R01_cb2761_c9/flp0/3396      | NA                       | R01_cb2761_c9/flp0/3396      | NA                       | NA                          |
| R01_cb8564_c123889/flp0/2931 | NA                       | R01_cb8564_c123889/flp0/2931 | NA                       | NA                          |
| R01_cb11361_c2/flp0/2841     | NA                       | R01_cb11361_c2/flp0/2841     | NA                       | R01_cb11361_c2/flp0/2841    |
| R01_cb15595_c0/f2p0/599      | NA                       | NA                           | NA                       | R01_cb15595_c0/f2p0/599     |
| R01_cb6286_c15/flp0/1743     | NA                       | NA                           | NA                       | R01_cb6286_c15/flp0/1743    |
| R01_cb10007_c24/flp0/518     | R01_cb10007_c24/flp0/518 | R01_cb10007_c24/flp0/518     | R01_cb10007_c24/flp0/518 | R01_cb10007_c24/flp0/518    |
| R01_cb8564_c90725/flp0/2935  | NA                       | R01_cb8564_c90725/flp0/2935  | NA                       | NA                          |
| R01_cb13041_c8/flp0/865      | NA                       | R01_cb13041_c8/flp0/865      | NA                       | R01_cb13041_c8/flp0/865     |

|                                  |                          |                                  |                           |                            |
|----------------------------------|--------------------------|----------------------------------|---------------------------|----------------------------|
| R01_cb4657_c7/f1p0/4018          | NA                       | NA                               | R01_cb4657_c7/f1p0/4018   | NA                         |
| R01_cb14323_c9/f2p0/770          | NA                       | R01_cb14323_c9/f2p0/770          | NA                        | NA                         |
| R01_cb8564_c115200/f1p0/228<br>2 | NA                       | R01_cb8564_c115200/f1p0/228<br>2 | NA                        | NA                         |
| R01_cb3949_c8/f1p1/3712          | NA                       | R01_cb3949_c8/f1p1/3712          | NA                        | NA                         |
| R01_cb17303_c3/f1p0/881          | NA                       | R01_cb17303_c3/f1p0/881          | NA                        | NA                         |
| R01_cb15553_c3/f3p0/1794         | NA                       | NA                               | NA                        | R01_cb15553_c3/f3p0/1794   |
| R01_cb12383_c9/f1p0/1820         | NA                       | R01_cb12383_c9/f1p0/1820         | NA                        | NA                         |
| R01_cb15938_c1/f1p0/867          | NA                       | NA                               | NA                        | R01_cb15938_c1/f1p0/867    |
| R01_cb15582_c0/f1p0/752          | NA                       | NA                               | NA                        | R01_cb15582_c0/f1p0/752    |
| R01_cb10742_c10/f1p0/915         | NA                       | NA                               | R01_cb10742_c10/f1p0/915  | R01_cb10742_c10/f1p0/915   |
| R01_cb11722_c1/f1p0/3069         | NA                       | NA                               | NA                        | R01_cb11722_c1/f1p0/3069   |
| R01_cb12437_c0/f3p1/776          | NA                       | R01_cb12437_c0/f3p1/776          | R01_cb12437_c0/f3p1/776   | R01_cb12437_c0/f3p1/776    |
| R01_cb11667_c1/f1p0/4128         | NA                       | R01_cb11667_c1/f1p0/4128         | R01_cb11667_c1/f1p0/4128  | NA                         |
| R01_cb6528_c4/f1p0/2794          | NA                       | R01_cb6528_c4/f1p0/2794          | NA                        | NA                         |
| R01_cb12972_c34/f1p0/458         | R01_cb12972_c34/f1p0/458 | R01_cb12972_c34/f1p0/458         | R01_cb12972_c34/f1p0/458  | R01_cb12972_c34/f1p0/458   |
| R01_cb3564_c14/f1p0/2619         | NA                       | NA                               | NA                        | R01_cb3564_c14/f1p0/2619   |
| R01_cb10166_c2/f1p0/812          | NA                       | R01_cb10166_c2/f1p0/812          | NA                        | NA                         |
| R01_cb7806_c1/f1p0/2342          | NA                       | R01_cb7806_c1/f1p0/2342          | R01_cb7806_c1/f1p0/2342   | R01_cb7806_c1/f1p0/2342    |
| R01_cb10015_c586/f1p0/523        | NA                       | R01_cb10015_c586/f1p0/523        | R01_cb10015_c586/f1p0/523 | NA                         |
| R01_cb8190_c2/f3p0/1707          | NA                       | NA                               | NA                        | R01_cb8190_c2/f3p0/1707    |
| R01_cb12443_c1/f1p2/540          | R01_cb12443_c1/f1p2/540  | R01_cb12443_c1/f1p2/540          | R01_cb12443_c1/f1p2/540   | R01_cb12443_c1/f1p2/540    |
| R01_cb18456_c7994/f1p2/707       | NA                       | NA                               | NA                        | R01_cb18456_c7994/f1p2/707 |
| R01_cb11668_c1/f1p0/2707         | NA                       | R01_cb11668_c1/f1p0/2707         | R01_cb11668_c1/f1p0/2707  | R01_cb11668_c1/f1p0/2707   |
| R01_cb2985_c15/f1p2/3532         | NA                       | NA                               | NA                        | R01_cb2985_c15/f1p2/3532   |
| R01_cb10676_c0/f9p0/481          | R01_cb10676_c0/f9p0/481  | R01_cb10676_c0/f9p0/481          | NA                        | R01_cb10676_c0/f9p0/481    |

|                              |                         |                              |                             |                             |
|------------------------------|-------------------------|------------------------------|-----------------------------|-----------------------------|
| R01_cb11204_c2/flp0/922      | NA                      | NA                           | NA                          | R01_cb11204_c2/flp0/922     |
| R01_cb17582_c5/flp0/649      | R01_cb17582_c5/flp0/649 | R01_cb17582_c5/flp0/649      | R01_cb17582_c5/flp0/649     | R01_cb17582_c5/flp0/649     |
| R01_cb4777_c4/flp0/696       | NA                      | NA                           | NA                          | R01_cb4777_c4/flp0/696      |
| R01_cb6633_c16/flp0/2313     | NA                      | R01_cb6633_c16/flp0/2313     | NA                          | NA                          |
| R01_cb18470_c1/flp0/885      | NA                      | R01_cb18470_c1/flp0/885      | NA                          | R01_cb18470_c1/flp0/885     |
| R01_cb8564_c76090/flp0/3995  | NA                      | R01_cb8564_c76090/flp0/3995  | NA                          | R01_cb8564_c76090/flp0/3995 |
| R01_cb8246_c0/flp0/2432      | NA                      | R01_cb8246_c0/flp0/2432      | NA                          | NA                          |
| R01_cb9008_c3/flp1/2214      | NA                      | NA                           | R01_cb9008_c3/flp1/2214     | NA                          |
| R01_cb8564_c70950/flp0/1916  | NA                      | R01_cb8564_c70950/flp0/1916  | R01_cb8564_c70950/flp0/1916 | R01_cb8564_c70950/flp0/1916 |
| R01_cb6507_c8/flp0/1130      | NA                      | NA                           | NA                          | R01_cb6507_c8/flp0/1130     |
| R01_cb3941_c95/flp0/2002     | NA                      | NA                           | NA                          | R01_cb3941_c95/flp0/2002    |
| R01_cb8564_c70960/flp0/2362  | NA                      | NA                           | NA                          | R01_cb8564_c70960/flp0/2362 |
| R01_cb18456_c1111/flp3/1088  | NA                      | R01_cb18456_c1111/flp3/1088  | NA                          | NA                          |
| R01_cb4822_c0/flp0/3252      | NA                      | R01_cb4822_c0/flp0/3252      | R01_cb4822_c0/flp0/3252     | R01_cb4822_c0/flp0/3252     |
| R01_cb5351_c0/flp1/3121      | NA                      | NA                           | NA                          | R01_cb5351_c0/flp1/3121     |
| R01_cb14675_c6/flp0/753      | R01_cb14675_c6/flp0/753 | R01_cb14675_c6/flp0/753      | R01_cb14675_c6/flp0/753     | R01_cb14675_c6/flp0/753     |
| R01_cb16515_c0/flp0/837      | NA                      | NA                           | NA                          | R01_cb16515_c0/flp0/837     |
| R01_cb8564_c71038/flp0/3922  | NA                      | R01_cb8564_c71038/flp0/3922  | R01_cb8564_c71038/flp0/3922 | R01_cb8564_c71038/flp0/3922 |
| R01_cb1729_c25/f2p4/3649     | NA                      | NA                           | NA                          | R01_cb1729_c25/f2p4/3649    |
| R01_cb16997_c51/flp0/3275    | NA                      | R01_cb16997_c51/flp0/3275    | NA                          | NA                          |
| R01_cb11286_c2/flp0/670      | NA                      | R01_cb11286_c2/flp0/670      | NA                          | NA                          |
| R01_cb8564_c119567/flp0/3103 | NA                      | R01_cb8564_c119567/flp0/3103 | NA                          | NA                          |
| R01_cb18175_c0/flp0/1009     | NA                      | R01_cb18175_c0/flp0/1009     | R01_cb18175_c0/flp0/1009    | R01_cb18175_c0/flp0/1009    |
| R01_cb8564_c21507/flp0/2810  | NA                      | NA                           | NA                          | R01_cb8564_c21507/flp0/2810 |
| R01_cb2226_c6/flp0/3264      | NA                      | NA                           | NA                          | R01_cb2226_c6/flp0/3264     |

|                             |                          |                             |                             |                             |
|-----------------------------|--------------------------|-----------------------------|-----------------------------|-----------------------------|
| R01_cb11283_c4/flp0/625     | NA                       | R01_cb11283_c4/flp0/625     | NA                          | R01_cb11283_c4/flp0/625     |
| R01_cb9352_c4/flp0/2066     | NA                       | NA                          | NA                          | R01_cb9352_c4/flp0/2066     |
| R01_cb6666_c7/flp0/2673     | NA                       | NA                          | NA                          | R01_cb6666_c7/flp0/2673     |
| R01_cb1779_c7/flp0/4115     | NA                       | NA                          | NA                          | R01_cb1779_c7/flp0/4115     |
| R01_cb18456_c7140/flp0/1822 | NA                       | R01_cb18456_c7140/flp0/1822 | R01_cb18456_c7140/flp0/1822 | R01_cb18456_c7140/flp0/1822 |
| R01_cb1113_c3/flp1/4206     | R01_cb1113_c3/flp1/4206  | R01_cb1113_c3/flp1/4206     | NA                          | R01_cb1113_c3/flp1/4206     |
| R01_cb8564_c34611/flp0/2586 | NA                       | R01_cb8564_c34611/flp0/2586 | NA                          | NA                          |
| R01_cb2675_c19/flp0/2756    | NA                       | NA                          | NA                          | R01_cb2675_c19/flp0/2756    |
| R01_cb17307_c1/flp0/1008    | R01_cb17307_c1/flp0/1008 | R01_cb17307_c1/flp0/1008    | NA                          | R01_cb17307_c1/flp0/1008    |
| R01_cb2082_c36/flp0/2660    | NA                       | NA                          | NA                          | R01_cb2082_c36/flp0/2660    |
| R01_cb17443_c0/f3p0/424     | NA                       | NA                          | NA                          | R01_cb17443_c0/f3p0/424     |
| R01_cb280_c82/flp0/3129     | NA                       | R01_cb280_c82/flp0/3129     | NA                          | NA                          |
| R01_cb2779_c6/flp0/1723     | NA                       | NA                          | NA                          | R01_cb2779_c6/flp0/1723     |
| R01_cb16937_c3/flp0/568     | NA                       | R01_cb16937_c3/flp0/568     | NA                          | R01_cb16937_c3/flp0/568     |
| R01_cb2823_c1/flp0/3417     | NA                       | NA                          | R01_cb2823_c1/flp0/3417     | NA                          |
| R01_cb9916_c1/flp0/1925     | NA                       | NA                          | NA                          | R01_cb9916_c1/flp0/1925     |
| R01_cb15883_c3/flp0/701     | NA                       | R01_cb15883_c3/flp0/701     | NA                          | NA                          |
| R01_cb7593_c0/flp0/2578     | NA                       | NA                          | R01_cb7593_c0/flp0/2578     | NA                          |
| R01_cb4345_c15/flp0/2192    | NA                       | NA                          | NA                          | R01_cb4345_c15/flp0/2192    |
| R01_cb8564_c22964/flp2/1995 | NA                       | R01_cb8564_c22964/flp2/1995 | NA                          | NA                          |
| R01_cb2632_c7/flp0/5264     | NA                       | R01_cb2632_c7/flp0/5264     | NA                          | NA                          |
| R01_cb16736_c1/f2p1/689     | NA                       | R01_cb16736_c1/f2p1/689     | NA                          | NA                          |
| R01_cb8564_c84492/flp0/2051 | NA                       | NA                          | NA                          | R01_cb8564_c84492/flp0/2051 |
| R01_cb8564_c77086/flp0/3582 | NA                       | R01_cb8564_c77086/flp0/3582 | NA                          | R01_cb8564_c77086/flp0/3582 |
| R01_cb8564_c90314/flp0/3467 | NA                       | R01_cb8564_c90314/flp0/3467 | NA                          | NA                          |
| R01_cb17760_c1/flp0/1328    | NA                       | NA                          | NA                          | R01_cb17760_c1/flp0/1328    |

|                              |                              |                              |                              |                              |
|------------------------------|------------------------------|------------------------------|------------------------------|------------------------------|
| R01_cb4493_c10/flp2/4658     | NA                           | NA                           | NA                           | R01_cb4493_c10/flp2/4658     |
| R01_cb15423_c2/flp1/830      | NA                           | R01_cb15423_c2/flp1/830      | R01_cb15423_c2/flp1/830      | R01_cb15423_c2/flp1/830      |
| R01_cb7603_c7/flp0/375       | R01_cb7603_c7/flp0/375       | R01_cb7603_c7/flp0/375       | R01_cb7603_c7/flp0/375       | R01_cb7603_c7/flp0/375       |
| R01_cb17_c16/flp0/3971       | NA                           | NA                           | NA                           | R01_cb17_c16/flp0/3971       |
| R01_cb8564_c4721/flp0/4316   | NA                           | NA                           | NA                           | R01_cb8564_c4721/flp0/4316   |
| R01_cb15474_c3/flp0/1822     | NA                           | NA                           | NA                           | R01_cb15474_c3/flp0/1822     |
| R01_cb17412_c4/flp0/749      | NA                           | R01_cb17412_c4/flp0/749      | R01_cb17412_c4/flp0/749      | R01_cb17412_c4/flp0/749      |
| R01_cb8564_c18146/f4p0/2170  | R01_cb8564_c18146/f4p0/2170  | R01_cb8564_c18146/f4p0/2170  | R01_cb8564_c18146/f4p0/2170  | R01_cb8564_c18146/f4p0/2170  |
| R01_cb9576_c15/flp0/1419     | NA                           | NA                           | NA                           | R01_cb9576_c15/flp0/1419     |
| R01_cb8564_c21556/flp0/3881  | NA                           | NA                           | NA                           | R01_cb8564_c21556/flp0/3881  |
| R01_cb11241_c3/flp0/1434     | NA                           | R01_cb11241_c3/flp0/1434     | NA                           | NA                           |
| R01_cb8564_c10587/flp1/3424  | NA                           | R01_cb8564_c10587/flp1/3424  | NA                           | R01_cb8564_c10587/flp1/3424  |
| R01_cb7682_c2/flp0/2436      | NA                           | R01_cb7682_c2/flp0/2436      | NA                           | NA                           |
| R01_cb15755_c0/f3p0/930      | NA                           | NA                           | NA                           | R01_cb15755_c0/f3p0/930      |
| R01_cb8564_c89996/flp1/2847  | NA                           | R01_cb8564_c89996/flp1/2847  | NA                           | R01_cb8564_c89996/flp1/2847  |
| R01_cb8564_c119319/flp0/2305 | R01_cb8564_c119319/flp0/2305 | R01_cb8564_c119319/flp0/2305 | R01_cb8564_c119319/flp0/2305 | R01_cb8564_c119319/flp0/2305 |
| R01_cb8564_c69853/flp0/2180  | NA                           | NA                           | R01_cb8564_c69853/flp0/2180  | R01_cb8564_c69853/flp0/2180  |
| R01_cb17956_c13/f3p0/629     | NA                           | R01_cb17956_c13/f3p0/629     | NA                           | NA                           |
| R01_cb8564_c10202/flp0/3998  | NA                           | R01_cb8564_c10202/flp0/3998  | NA                           | R01_cb8564_c10202/flp0/3998  |
| R01_cb8564_c129896/flp0/4743 | NA                           | R01_cb8564_c129896/flp0/4743 | NA                           | NA                           |
| R01_cb4505_c0/flp0/3329      | NA                           | NA                           | R01_cb4505_c0/flp0/3329      | NA                           |
| R01_cb10026_c2/flp0/1082     | NA                           | R01_cb10026_c2/flp0/1082     | NA                           | NA                           |
| R01_cb17179_c2/flp0/1779     | NA                           | R01_cb17179_c2/flp0/1779     | NA                           | NA                           |

|                             |                            |                             |                            |                            |
|-----------------------------|----------------------------|-----------------------------|----------------------------|----------------------------|
| R01_cb8564_c4001/flp0/2849  | NA                         | NA                          | NA                         | R01_cb8564_c4001/flp0/2849 |
| R01_cb3388_c1/flp0/3640     | NA                         | NA                          | NA                         | R01_cb3388_c1/flp0/3640    |
| R01_cb10787_c7/flp0/1352    | NA                         | NA                          | NA                         | R01_cb10787_c7/flp0/1352   |
| R01_cb18456_c7215/flp0/447  | R01_cb18456_c7215/flp0/447 | R01_cb18456_c7215/flp0/447  | R01_cb18456_c7215/flp0/447 | R01_cb18456_c7215/flp0/447 |
| R01_cb18156_c1/flp0/976     | NA                         | NA                          | R01_cb18156_c1/flp0/976    | R01_cb18156_c1/flp0/976    |
| R01_cb8409_c8/flp1/2318     | NA                         | NA                          | NA                         | R01_cb8409_c8/flp1/2318    |
| R01_cb10015_c340/flp0/544   | NA                         | R01_cb10015_c340/flp0/544   | NA                         | NA                         |
| R01_cb15373_c1/flp0/381     | R01_cb15373_c1/flp0/381    | R01_cb15373_c1/flp0/381     | R01_cb15373_c1/flp0/381    | R01_cb15373_c1/flp0/381    |
| R01_cb3426_c7/flp0/2789     | NA                         | NA                          | NA                         | R01_cb3426_c7/flp0/2789    |
| R01_cb11608_c0/flp0/1104    | R01_cb11608_c0/flp0/1104   | R01_cb11608_c0/flp0/1104    | R01_cb11608_c0/flp0/1104   | R01_cb11608_c0/flp0/1104   |
| R01_cb15541_c1/f2p0/956     | NA                         | NA                          | NA                         | R01_cb15541_c1/f2p0/956    |
| R01_cb11063_c1/flp0/1953    | NA                         | R01_cb11063_c1/flp0/1953    | NA                         | R01_cb11063_c1/flp0/1953   |
| R01_cb8564_c24276/flp0/4454 | NA                         | R01_cb8564_c24276/flp0/4454 | NA                         | NA                         |
| R01_cb11804_c0/flp0/517     | R01_cb11804_c0/flp0/517    | R01_cb11804_c0/flp0/517     | R01_cb11804_c0/flp0/517    | R01_cb11804_c0/flp0/517    |
| R01_cb9472_c3/flp0/1395     | NA                         | NA                          | NA                         | R01_cb9472_c3/flp0/1395    |
| R01_cb3424_c2/flp1/3604     | NA                         | NA                          | NA                         | R01_cb3424_c2/flp1/3604    |
| R01_cb7612_c6/flp0/2279     | NA                         | NA                          | NA                         | R01_cb7612_c6/flp0/2279    |
| R01_cb9448_c7/flp1/1843     | NA                         | NA                          | NA                         | R01_cb9448_c7/flp1/1843    |
| R01_cb3376_c1/flp0/3642     | R01_cb3376_c1/flp0/3642    | R01_cb3376_c1/flp0/3642     | NA                         | R01_cb3376_c1/flp0/3642    |
| R01_cb9222_c23/flp0/2509    | NA                         | R01_cb9222_c23/flp0/2509    | R01_cb9222_c23/flp0/2509   | R01_cb9222_c23/flp0/2509   |
| R01_cb1839_c1/f3p1/4160     | NA                         | NA                          | NA                         | R01_cb1839_c1/f3p1/4160    |
| R01_cb8814_c4/flp0/2257     | NA                         | R01_cb8814_c4/flp0/2257     | NA                         | NA                         |
| R01_cb8564_c22143/flp1/2486 | NA                         | R01_cb8564_c22143/flp1/2486 | NA                         | NA                         |
| R01_cb1612_c6/flp5/3499     | NA                         | NA                          | NA                         | R01_cb1612_c6/flp5/3499    |
| R01_cb15186_c7/f5p0/439     | R01_cb15186_c7/f5p0/439    | R01_cb15186_c7/f5p0/439     | R01_cb15186_c7/f5p0/439    | NA                         |
| R01_cb8811_c2/flp0/2284     | NA                         | R01_cb8811_c2/flp0/2284     | NA                         | NA                         |



|                              |                             |                              |                              |                              |
|------------------------------|-----------------------------|------------------------------|------------------------------|------------------------------|
| R01_cb18456_c5288/flp0/1071  | NA                          | R01_cb18456_c5288/flp0/1071  | NA                           | R01_cb18456_c5288/flp0/1071  |
| R01_cb8564_c19645/flp0/2667  | NA                          | R01_cb8564_c19645/flp0/2667  | NA                           | NA                           |
| R01_cb18456_c888/flp3/796    | NA                          | R01_cb18456_c888/flp3/796    | NA                           | NA                           |
| R01_cb18039_c0/flp0/749      | NA                          | NA                           | R01_cb18039_c0/flp0/749      | R01_cb18039_c0/flp0/749      |
| R01_cb10337_c9/flp2/373      | R01_cb10337_c9/flp2/373     | R01_cb10337_c9/flp2/373      | NA                           | R01_cb10337_c9/flp2/373      |
| R01_cb7838_c3/flp0/2768      | NA                          | R01_cb7838_c3/flp0/2768      | NA                           | R01_cb7838_c3/flp0/2768      |
| R01_cb707_c7/flp0/497        | R01_cb707_c7/flp0/497       | R01_cb707_c7/flp0/497        | R01_cb707_c7/flp0/497        | R01_cb707_c7/flp0/497        |
| R01_cb8564_c75518/flp0/3000  | R01_cb8564_c75518/flp0/3000 | R01_cb8564_c75518/flp0/3000  | R01_cb8564_c75518/flp0/3000  | R01_cb8564_c75518/flp0/3000  |
| R01_cb1628_c4/flp0/2042      | NA                          | NA                           | NA                           | R01_cb1628_c4/flp0/2042      |
| R01_cb16119_c0/f2p0/425      | NA                          | R01_cb16119_c0/f2p0/425      | R01_cb16119_c0/f2p0/425      | R01_cb16119_c0/f2p0/425      |
| R01_cb16613_c2/flp0/1093     | NA                          | NA                           | NA                           | R01_cb16613_c2/flp0/1093     |
| R01_cb18456_c1831/flp0/1418  | R01_cb18456_c1831/flp0/1418 | R01_cb18456_c1831/flp0/1418  | R01_cb18456_c1831/flp0/1418  | R01_cb18456_c1831/flp0/1418  |
| R01_cb4576_c94/flp0/2970     | NA                          | NA                           | NA                           | R01_cb4576_c94/flp0/2970     |
| R01_cb8564_c4639/flp0/2649   | NA                          | R01_cb8564_c4639/flp0/2649   | NA                           | NA                           |
| R01_cb18287_c1/flp0/905      | NA                          | R01_cb18287_c1/flp0/905      | R01_cb18287_c1/flp0/905      | R01_cb18287_c1/flp0/905      |
| R01_cb8564_c85118/flp0/4007  | NA                          | R01_cb8564_c85118/flp0/4007  | NA                           | NA                           |
| R01_cb6758_c2/flp0/2762      | NA                          | NA                           | NA                           | R01_cb6758_c2/flp0/2762      |
| R01_cb9382_c1/flp0/2149      | NA                          | NA                           | NA                           | R01_cb9382_c1/flp0/2149      |
| R01_cb8564_c84564/flp0/2312  | NA                          | NA                           | NA                           | R01_cb8564_c84564/flp0/2312  |
| R01_cb8564_c20545/flp0/4047  | NA                          | R01_cb8564_c20545/flp0/4047  | NA                           | NA                           |
| R01_cb8564_c116543/flp0/2241 | NA                          | R01_cb8564_c116543/flp0/2241 | R01_cb8564_c116543/flp0/2241 | R01_cb8564_c116543/flp0/2241 |
| R01_cb13045_c9/flp0/784      | NA                          | NA                           | R01_cb13045_c9/flp0/784      | R01_cb13045_c9/flp0/784      |
| R01_cb3120_c47/flp1/3369     | R01_cb3120_c47/flp1/3369    | R01_cb3120_c47/flp1/3369     | NA                           | NA                           |

|                                  |                                  |                                  |                                  |                                  |
|----------------------------------|----------------------------------|----------------------------------|----------------------------------|----------------------------------|
| R01_cb10025_c11/flp0/1638        | R01_cb10025_c11/flp0/1638        | R01_cb10025_c11/flp0/1638        | NA                               | NA                               |
| R01_cb2576_c0/f3p0/3843          | NA                               | NA                               | R01_cb2576_c0/f3p0/3843          | NA                               |
| R01_cb12641_c12/flp0/1005        | NA                               | NA                               | NA                               | R01_cb12641_c12/flp0/1005        |
| R01_cb5373_c7/flp0/2625          | NA                               | NA                               | NA                               | R01_cb5373_c7/flp0/2625          |
| R01_cb13279_c3/flp0/881          | NA                               | NA                               | NA                               | R01_cb13279_c3/flp0/881          |
| R01_cb693_c5/flp0/2880           | NA                               | NA                               | NA                               | R01_cb693_c5/flp0/2880           |
| R01_cb18386_c4/flp1/1388         | NA                               | R01_cb18386_c4/flp1/1388         | NA                               | NA                               |
| R01_cb5830_c0/f2p1/2108          | NA                               | NA                               | NA                               | R01_cb5830_c0/f2p1/2108          |
| R01_cb16860_c0/f3p0/830          | NA                               | R01_cb16860_c0/f3p0/830          | NA                               | NA                               |
| R01_cb1230_c4/flp0/3498          | NA                               | R01_cb1230_c4/flp0/3498          | R01_cb1230_c4/flp0/3498          | R01_cb1230_c4/flp0/3498          |
| R01_cb8564_c128525/flp0/396<br>1 | NA                               | R01_cb8564_c128525/flp0/396<br>1 | R01_cb8564_c128525/flp0/396<br>1 | NA                               |
| R01_cb8564_c34985/flp0/3209      | R01_cb8564_c34985/flp0/3209<br>9 | R01_cb8564_c34985/flp0/3209      | R01_cb8564_c34985/flp0/3209      | R01_cb8564_c34985/flp0/3209      |
| R01_cb4962_c2/flp0/2493          | NA                               | R01_cb4962_c2/flp0/2493          | NA                               | NA                               |
| R01_cb12505_c9/flp0/310          | R01_cb12505_c9/flp0/310          | R01_cb12505_c9/flp0/310          | R01_cb12505_c9/flp0/310          | R01_cb12505_c9/flp0/310          |
| R01_cb10024_c663/flp0/683        | NA                               | NA                               | R01_cb10024_c663/flp0/683        | R01_cb10024_c663/flp0/683        |
| R01_cb3445_c5/flp1/2894          | NA                               | NA                               | NA                               | R01_cb3445_c5/flp1/2894          |
| R01_cb8564_c127999/flp0/245<br>4 | NA                               | R01_cb8564_c127999/flp0/245<br>4 | NA                               | NA                               |
| R01_cb8564_c114241/flp0/221<br>9 | NA                               | R01_cb8564_c114241/flp0/221<br>9 | R01_cb8564_c114241/flp0/221<br>9 | R01_cb8564_c114241/flp0/221<br>9 |
| R01_cb8564_c22989/flp0/4427      | NA                               | R01_cb8564_c22989/flp0/4427      | NA                               | NA                               |
| R01_cb3359_c20/flp0/4121         | NA                               | R01_cb3359_c20/flp0/4121         | NA                               | NA                               |
| R01_cb3103_c0/flp0/3719          | R01_cb3103_c0/flp0/3719          | R01_cb3103_c0/flp0/3719          | NA                               | NA                               |
| R01_cb15934_c0/flp0/798          | NA                               | R01_cb15934_c0/flp0/798          | NA                               | R01_cb15934_c0/flp0/798          |

|                             |                             |                             |                             |                             |
|-----------------------------|-----------------------------|-----------------------------|-----------------------------|-----------------------------|
| R01_cb4000_c2/flp0/2213     | NA                          | R01_cb4000_c2/flp0/2213     | NA                          | NA                          |
| R01_cb8564_c41423/flp1/2878 | NA                          | NA                          | R01_cb8564_c41423/flp1/2878 | NA                          |
| R01_cb16387_c11/flp0/1673   | NA                          | NA                          | NA                          | R01_cb16387_c11/flp0/1673   |
| R01_cb8564_c74184/flp1/3323 | NA                          | R01_cb8564_c74184/flp1/3323 | NA                          | R01_cb8564_c74184/flp1/3323 |
| R01_cb4800_c3/flp0/3705     | NA                          | R01_cb4800_c3/flp0/3705     | NA                          | NA                          |
| R01_cb4434_c5/flp0/3356     | NA                          | NA                          | NA                          | R01_cb4434_c5/flp0/3356     |
| R01_cb709_c13/flp0/2493     | NA                          | R01_cb709_c13/flp0/2493     | NA                          | NA                          |
| R01_cb5486_c5/flp0/2267     | R01_cb5486_c5/flp0/2267     | R01_cb5486_c5/flp0/2267     | R01_cb5486_c5/flp0/2267     | R01_cb5486_c5/flp0/2267     |
| R01_cb6057_c1/flp0/2947     | NA                          | NA                          | NA                          | R01_cb6057_c1/flp0/2947     |
| R01_cb8564_c88797/f3p1/1986 | R01_cb8564_c88797/f3p1/1986 | NA                          | NA                          | NA                          |
| R01_cb1653_c2/flp0/4075     | NA                          | NA                          | NA                          | R01_cb1653_c2/flp0/4075     |
| R01_cb8324_c6/flp0/1418     | NA                          | NA                          | NA                          | R01_cb8324_c6/flp0/1418     |
| R01_cb17863_c1/flp0/1480    | NA                          | NA                          | NA                          | R01_cb17863_c1/flp0/1480    |
| R01_cb6507_c10/flp0/1082    | NA                          | NA                          | NA                          | R01_cb6507_c10/flp0/1082    |
| R01_cb8564_c53520/flp0/2997 | NA                          | NA                          | R01_cb8564_c53520/flp0/2997 | NA                          |
| R01_cb13585_c5/flp0/428     | R01_cb13585_c5/flp0/428     | R01_cb13585_c5/flp0/428     | NA                          | NA                          |
| R01_cb8564_c83513/flp0/2970 | NA                          | NA                          | NA                          | R01_cb8564_c83513/flp0/2970 |
| R01_cb6406_c14/flp0/2905    | NA                          | R01_cb6406_c14/flp0/2905    | NA                          | NA                          |
| R01_cb8564_c88825/flp0/3058 | R01_cb8564_c88825/flp0/3058 | NA                          | NA                          | NA                          |
| R01_cb3543_c5/flp0/3177     | NA                          | R01_cb3543_c5/flp0/3177     | NA                          | NA                          |
| R01_cb6356_c4/flp0/1535     | NA                          | NA                          | NA                          | R01_cb6356_c4/flp0/1535     |
| R01_cb1333_c36/flp0/3149    | R01_cb1333_c36/flp0/3149    | R01_cb1333_c36/flp0/3149    | R01_cb1333_c36/flp0/3149    | R01_cb1333_c36/flp0/3149    |
| R01_cb5421_c8/flp0/1843     | NA                          | R01_cb5421_c8/flp0/1843     | R01_cb5421_c8/flp0/1843     | NA                          |
| R01_cb6802_c35/flp0/1940    | NA                          | R01_cb6802_c35/flp0/1940    | R01_cb6802_c35/flp0/1940    | R01_cb6802_c35/flp0/1940    |

|                              |                          |                              |                             |                              |
|------------------------------|--------------------------|------------------------------|-----------------------------|------------------------------|
| R01_cb8564_c77611/f1p0/2668  | NA                       | R01_cb8564_c77611/f1p0/2668  | R01_cb8564_c77611/f1p0/2668 | R01_cb8564_c77611/f1p0/2668  |
| R01_cb16086_c0/f2p0/386      | R01_cb16086_c0/f2p0/386  | R01_cb16086_c0/f2p0/386      | R01_cb16086_c0/f2p0/386     | R01_cb16086_c0/f2p0/386      |
| R01_cb6686_c2/f1p0/2779      | NA                       | R01_cb6686_c2/f1p0/2779      | R01_cb6686_c2/f1p0/2779     | NA                           |
| R01_cb15118_c5/f1p0/604      | NA                       | NA                           | NA                          | R01_cb15118_c5/f1p0/604      |
| R01_cb3169_c2/f1p0/1985      | NA                       | NA                           | NA                          | R01_cb3169_c2/f1p0/1985      |
| R01_cb8107_c3/f1p0/658       | R01_cb8107_c3/f1p0/658   | R01_cb8107_c3/f1p0/658       | R01_cb8107_c3/f1p0/658      | R01_cb8107_c3/f1p0/658       |
| R01_cb545_c2/f1p0/4751       | NA                       | R01_cb545_c2/f1p0/4751       | NA                          | NA                           |
| R01_cb14141_c4/f1p0/877      | NA                       | R01_cb14141_c4/f1p0/877      | R01_cb14141_c4/f1p0/877     | R01_cb14141_c4/f1p0/877      |
| R01_cb18257_c0/f1p0/1739     | NA                       | NA                           | NA                          | R01_cb18257_c0/f1p0/1739     |
| R01_cb965_c51/f1p0/2659      | NA                       | R01_cb965_c51/f1p0/2659      | NA                          | NA                           |
| R01_cb17756_c19/f1p0/1743    | NA                       | R01_cb17756_c19/f1p0/1743    | R01_cb17756_c19/f1p0/1743   | NA                           |
| R01_cb8564_c110324/f1p0/1912 | NA                       | R01_cb8564_c110324/f1p0/1912 | NA                          | R01_cb8564_c110324/f1p0/1912 |
| R01_cb10444_c2/f1p0/2271     | NA                       | R01_cb10444_c2/f1p0/2271     | NA                          | NA                           |
| R01_cb12165_c20/f1p1/970     | NA                       | R01_cb12165_c20/f1p1/970     | NA                          | NA                           |
| R01_cb13440_c1/f1p0/483      | NA                       | R01_cb13440_c1/f1p0/483      | NA                          | R01_cb13440_c1/f1p0/483      |
| R01_cb11830_c0/f1p0/855      | NA                       | R01_cb11830_c0/f1p0/855      | R01_cb11830_c0/f1p0/855     | R01_cb11830_c0/f1p0/855      |
| R01_cb16136_c8/f1p0/1730     | NA                       | NA                           | NA                          | R01_cb16136_c8/f1p0/1730     |
| R01_cb11250_c1/f1p0/1955     | R01_cb11250_c1/f1p0/1955 | R01_cb11250_c1/f1p0/1955     | R01_cb11250_c1/f1p0/1955    | R01_cb11250_c1/f1p0/1955     |
| R01_cb8564_c24180/f1p0/4190  | NA                       | NA                           | NA                          | R01_cb8564_c24180/f1p0/4190  |
| R01_cb8564_c3818/f1p1/3602   | NA                       | R01_cb8564_c3818/f1p1/3602   | NA                          | NA                           |
| R01_cb11636_c3/f1p0/2559     | R01_cb11636_c3/f1p0/2559 | R01_cb11636_c3/f1p0/2559     | NA                          | NA                           |
| R01_cb14982_c2/f2p0/511      | NA                       | NA                           | R01_cb14982_c2/f2p0/511     | R01_cb14982_c2/f2p0/511      |
| R01_cb16706_c0/f2p0/895      | R01_cb16706_c0/f2p0/895  | R01_cb16706_c0/f2p0/895      | NA                          | R01_cb16706_c0/f2p0/895      |
| R01_cb6365_c4/f1p2/2876      | NA                       | R01_cb6365_c4/f1p2/2876      | NA                          | NA                           |
| R01_cb5698_c8/f1p0/1782      | NA                       | R01_cb5698_c8/f1p0/1782      | NA                          | NA                           |

|                              |                             |                              |                             |                              |
|------------------------------|-----------------------------|------------------------------|-----------------------------|------------------------------|
| R01_cb8564_c119490/flp0/2228 | NA                          | R01_cb8564_c119490/flp0/2228 | NA                          | R01_cb8564_c119490/flp0/2228 |
| R01_cb10034_c46/flp6/1244    | NA                          | R01_cb10034_c46/flp6/1244    | NA                          | NA                           |
| R01_cb7014_c3/flp1/2715      | NA                          | R01_cb7014_c3/flp1/2715      | NA                          | NA                           |
| R01_cb2309_c4/flp0/2747      | NA                          | R01_cb2309_c4/flp0/2747      | NA                          | NA                           |
| R01_cb8564_c49686/flp0/2254  | NA                          | R01_cb8564_c49686/flp0/2254  | NA                          | NA                           |
| R01_cb8564_c19798/flp0/4232  | R01_cb8564_c19798/flp0/4232 | R01_cb8564_c19798/flp0/4232  | NA                          | R01_cb8564_c19798/flp0/4232  |
| R01_cb4514_c0/f4p1/1950      | NA                          | NA                           | NA                          | R01_cb4514_c0/f4p1/1950      |
| R01_cb18199_c1/flp0/629      | NA                          | R01_cb18199_c1/flp0/629      | NA                          | R01_cb18199_c1/flp0/629      |
| R01_cb8564_c1880/flp0/3005   | NA                          | NA                           | NA                          | R01_cb8564_c1880/flp0/3005   |
| R01_cb7654_c4/flp0/497       | NA                          | R01_cb7654_c4/flp0/497       | NA                          | R01_cb7654_c4/flp0/497       |
| R01_cb7946_c4/flp0/1103      | NA                          | R01_cb7946_c4/flp0/1103      | R01_cb7946_c4/flp0/1103     | NA                           |
| R01_cb4653_c1/flp0/3426      | NA                          | R01_cb4653_c1/flp0/3426      | NA                          | R01_cb4653_c1/flp0/3426      |
| R01_cb2042_c1/flp0/2332      | NA                          | NA                           | NA                          | R01_cb2042_c1/flp0/2332      |
| R01_cb8564_c22258/flp0/3986  | NA                          | R01_cb8564_c22258/flp0/3986  | NA                          | R01_cb8564_c22258/flp0/3986  |
| R01_cb8564_c76928/flp1/2983  | NA                          | R01_cb8564_c76928/flp1/2983  | R01_cb8564_c76928/flp1/2983 | NA                           |
| R01_cb15811_c5/f7p0/809      | NA                          | R01_cb15811_c5/f7p0/809      | R01_cb15811_c5/f7p0/809     | R01_cb15811_c5/f7p0/809      |
| R01_cb16178_c1/flp0/1078     | R01_cb16178_c1/flp0/1078    | R01_cb16178_c1/flp0/1078     | R01_cb16178_c1/flp0/1078    | R01_cb16178_c1/flp0/1078     |
| R01_cb8564_c1408/flp0/3090   | NA                          | R01_cb8564_c1408/flp0/3090   | NA                          | NA                           |
| R01_cb8564_c79171/flp0/2207  | R01_cb8564_c79171/flp0/2207 | R01_cb8564_c79171/flp0/2207  | R01_cb8564_c79171/flp0/2207 | R01_cb8564_c79171/flp0/2207  |
| R01_cb4414_c3/flp0/2241      | NA                          | R01_cb4414_c3/flp0/2241      | NA                          | NA                           |
| R01_cb13766_c11/flp0/634     | R01_cb13766_c11/flp0/634    | R01_cb13766_c11/flp0/634     | R01_cb13766_c11/flp0/634    | NA                           |
| R01_cb8564_c12071/flp0/3873  | NA                          | R01_cb8564_c12071/flp0/3873  | NA                          | NA                           |
| R01_cb16564_c1/flp0/1132     | NA                          | R01_cb16564_c1/flp0/1132     | R01_cb16564_c1/flp0/1132    | R01_cb16564_c1/flp0/1132     |

|                              |                            |                              |                            |                             |
|------------------------------|----------------------------|------------------------------|----------------------------|-----------------------------|
| R01_cb7019_c2/flp0/2573      | NA                         | R01_cb7019_c2/flp0/2573      | R01_cb7019_c2/flp0/2573    | R01_cb7019_c2/flp0/2573     |
| R01_cb9606_c64/flp0/1698     | NA                         | R01_cb9606_c64/flp0/1698     | NA                         | NA                          |
| R01_cb4576_c133/flp0/2323    | R01_cb4576_c133/flp0/2323  | R01_cb4576_c133/flp0/2323    | R01_cb4576_c133/flp0/2323  | R01_cb4576_c133/flp0/2323   |
| R01_cb3368_c0/flp0/3642      | NA                         | NA                           | NA                         | R01_cb3368_c0/flp0/3642     |
| R01_cb15533_c11/flp0/1222    | NA                         | R01_cb15533_c11/flp0/1222    | NA                         | NA                          |
| R01_cb14321_c1/flp0/1621     | NA                         | R01_cb14321_c1/flp0/1621     | NA                         | NA                          |
| R01_cb9506_c7/flp1/1246      | NA                         | NA                           | NA                         | R01_cb9506_c7/flp1/1246     |
| R01_cb8900_c10/flp0/2151     | NA                         | NA                           | NA                         | R01_cb8900_c10/flp0/2151    |
| R01_cb8564_c69376/f2p0/2056  | NA                         | R01_cb8564_c69376/f2p0/2056  | NA                         | NA                          |
| R01_cb14523_c2/flp0/1724     | NA                         | NA                           | NA                         | R01_cb14523_c2/flp0/1724    |
| R01_cb18456_c1415/flp0/449   | R01_cb18456_c1415/flp0/449 | R01_cb18456_c1415/flp0/449   | R01_cb18456_c1415/flp0/449 | R01_cb18456_c1415/flp0/449  |
| R01_cb2528_c2/flp0/4010      | NA                         | R01_cb2528_c2/flp0/4010      | NA                         | NA                          |
| R01_cb9305_c3/flp1/2433      | NA                         | R01_cb9305_c3/flp1/2433      | NA                         | NA                          |
| R01_cb4499_c5/flp0/3094      | NA                         | NA                           | NA                         | R01_cb4499_c5/flp0/3094     |
| R01_cb18456_c1644/f2p0/558   | NA                         | R01_cb18456_c1644/f2p0/558   | R01_cb18456_c1644/f2p0/558 | NA                          |
| R01_cb2577_c11/flp0/3419     | NA                         | R01_cb2577_c11/flp0/3419     | NA                         | NA                          |
| R01_cb13490_c4/flp0/961      | NA                         | R01_cb13490_c4/flp0/961      | R01_cb13490_c4/flp0/961    | R01_cb13490_c4/flp0/961     |
| R01_cb3558_c7/flp2/2733      | NA                         | NA                           | NA                         | R01_cb3558_c7/flp2/2733     |
| R01_cb16146_c2/flp0/1257     | NA                         | R01_cb16146_c2/flp0/1257     | NA                         | NA                          |
| R01_cb8564_c120080/flp0/2166 | NA                         | R01_cb8564_c120080/flp0/2166 | NA                         | NA                          |
| R01_cb12292_c16/flp0/1881    | NA                         | R01_cb12292_c16/flp0/1881    | NA                         | NA                          |
| R01_cb2870_c5/flp0/3045      | NA                         | NA                           | NA                         | R01_cb2870_c5/flp0/3045     |
| R01_cb13165_c2/flp0/559      | NA                         | R01_cb13165_c2/flp0/559      | NA                         | NA                          |
| R01_cb1936_c1/flp0/3489      | R01_cb1936_c1/flp0/3489    | R01_cb1936_c1/flp0/3489      | R01_cb1936_c1/flp0/3489    | R01_cb1936_c1/flp0/3489     |
| R01_cb8564_c13297/flp0/2043  | NA                         | R01_cb8564_c13297/flp0/2043  | NA                         | R01_cb8564_c13297/flp0/2043 |

|                             |                             |                             |                             |                             |
|-----------------------------|-----------------------------|-----------------------------|-----------------------------|-----------------------------|
| R01_cb8564_c15952/flp0/4578 | NA                          | R01_cb8564_c15952/flp0/4578 | R01_cb8564_c15952/flp0/4578 | NA                          |
| R01_cb8564_c73180/flp0/3827 | NA                          | NA                          | NA                          | R01_cb8564_c73180/flp0/3827 |
| R01_cb10017_c48/flp2/979    | NA                          | R01_cb10017_c48/flp2/979    | NA                          | NA                          |
| R01_cb18456_c6666/flp0/535  | NA                          | R01_cb18456_c6666/flp0/535  | R01_cb18456_c6666/flp0/535  | R01_cb18456_c6666/flp0/535  |
| R01_cb8564_c939/f2p0/3121   | NA                          | NA                          | NA                          | R01_cb8564_c939/f2p0/3121   |
| R01_cb8564_c84431/flp0/2738 | NA                          | R01_cb8564_c84431/flp0/2738 | NA                          | NA                          |
| R01_cb8564_c89179/flp0/3763 | NA                          | R01_cb8564_c89179/flp0/3763 | NA                          | NA                          |
| R01_cb1967_c18/flp1/2406    | NA                          | R01_cb1967_c18/flp1/2406    | R01_cb1967_c18/flp1/2406    | R01_cb1967_c18/flp1/2406    |
| R01_cb11234_c3/flp0/1603    | NA                          | R01_cb11234_c3/flp0/1603    | NA                          | NA                          |
| R01_cb17337_c1/flp0/1348    | R01_cb17337_c1/flp0/1348    | R01_cb17337_c1/flp0/1348    | R01_cb17337_c1/flp0/1348    | R01_cb17337_c1/flp0/1348    |
| R01_cb5676_c3/flp0/3038     | NA                          | NA                          | NA                          | R01_cb5676_c3/flp0/3038     |
| R01_cb9895_c8/flp0/1643     | NA                          | R01_cb9895_c8/flp0/1643     | NA                          | NA                          |
| R01_cb8173_c11/flp3/1095    | NA                          | R01_cb8173_c11/flp3/1095    | R01_cb8173_c11/flp3/1095    | R01_cb8173_c11/flp3/1095    |
| R01_cb5288_c5/flp0/2975     | NA                          | R01_cb5288_c5/flp0/2975     | NA                          | NA                          |
| R01_cb8564_c75002/flp0/2669 | R01_cb8564_c75002/flp0/2669 | R01_cb8564_c75002/flp0/2669 | R01_cb8564_c75002/flp0/2669 | NA                          |
| R01_cb6258_c10/flp0/2621    | NA                          | NA                          | NA                          | R01_cb6258_c10/flp0/2621    |
| R01_cb15669_c4/flp0/409     | R01_cb15669_c4/flp0/409     | R01_cb15669_c4/flp0/409     | R01_cb15669_c4/flp0/409     | R01_cb15669_c4/flp0/409     |
| R01_cb7530_c2/flp0/2595     | NA                          | NA                          | NA                          | R01_cb7530_c2/flp0/2595     |
| R01_cb8564_c71113/flp0/2280 | NA                          | NA                          | NA                          | R01_cb8564_c71113/flp0/2280 |
| R01_cb8564_c4481/f2p0/3109  | NA                          | NA                          | NA                          | R01_cb8564_c4481/f2p0/3109  |
| R01_cb10665_c2/flp0/2949    | R01_cb10665_c2/flp0/2949    | R01_cb10665_c2/flp0/2949    | NA                          | R01_cb10665_c2/flp0/2949    |
| R01_cb10536_c0/flp0/1572    | NA                          | R01_cb10536_c0/flp0/1572    | R01_cb10536_c0/flp0/1572    | R01_cb10536_c0/flp0/1572    |
| R01_cb14907_c2/flp0/1693    | NA                          | R01_cb14907_c2/flp0/1693    | NA                          | NA                          |
| R01_cb2985_c7/flp0/3138     | NA                          | NA                          | NA                          | R01_cb2985_c7/flp0/3138     |
| R01_cb5471_c20/f3p0/2612    | NA                          | NA                          | NA                          | R01_cb5471_c20/f3p0/2612    |

|                             |                            |                             |                             |                             |
|-----------------------------|----------------------------|-----------------------------|-----------------------------|-----------------------------|
| R01_cb6356_c7/flp0/438      | R01_cb6356_c7/flp0/438     | R01_cb6356_c7/flp0/438      | NA                          | R01_cb6356_c7/flp0/438      |
| R01_cb6179_c0/flp0/2919     | NA                         | R01_cb6179_c0/flp0/2919     | NA                          | NA                          |
| R01_cb3415_c3/flp0/4126     | NA                         | R01_cb3415_c3/flp0/4126     | NA                          | NA                          |
| R01_cb10586_c2/flp0/2001    | NA                         | NA                          | NA                          | R01_cb10586_c2/flp0/2001    |
| R01_cb8441_c3/f2p1/1334     | NA                         | NA                          | NA                          | R01_cb8441_c3/f2p1/1334     |
| R01_cb18456_c7205/flp0/917  | R01_cb18456_c7205/flp0/917 | R01_cb18456_c7205/flp0/917  | R01_cb18456_c7205/flp0/917  | R01_cb18456_c7205/flp0/917  |
| R01_cb8564_c18465/flp0/2920 | NA                         | R01_cb8564_c18465/flp0/2920 | R01_cb8564_c18465/flp0/2920 | R01_cb8564_c18465/flp0/2920 |
| R01_cb402_c31/flp0/1999     | NA                         | NA                          | NA                          | R01_cb402_c31/flp0/1999     |
| R01_cb10560_c5/flp0/1521    | NA                         | R01_cb10560_c5/flp0/1521    | NA                          | NA                          |
| R01_cb13283_c9/flp0/1806    | NA                         | NA                          | NA                          | R01_cb13283_c9/flp0/1806    |
| R01_cb13204_c2/flp0/1415    | NA                         | NA                          | NA                          | R01_cb13204_c2/flp0/1415    |
| R01_cb8564_c78637/flp0/2064 | NA                         | R01_cb8564_c78637/flp0/2064 | R01_cb8564_c78637/flp0/2064 | R01_cb8564_c78637/flp0/2064 |
| R01_cb5717_c7/flp0/2086     | NA                         | R01_cb5717_c7/flp0/2086     | NA                          | R01_cb5717_c7/flp0/2086     |
| R01_cb4123_c78/flp1/1364    | NA                         | R01_cb4123_c78/flp1/1364    | NA                          | NA                          |
| R01_cb15443_c3/flp0/1223    | NA                         | NA                          | NA                          | R01_cb15443_c3/flp0/1223    |
| R01_cb9530_c4/flp1/1777     | NA                         | NA                          | NA                          | R01_cb9530_c4/flp1/1777     |
| R01_cb15568_c5/flp0/947     | NA                         | NA                          | NA                          | R01_cb15568_c5/flp0/947     |
| R01_cb8564_c22529/flp0/2467 | NA                         | R01_cb8564_c22529/flp0/2467 | R01_cb8564_c22529/flp0/2467 | R01_cb8564_c22529/flp0/2467 |
| R01_cb1113_c2/f2p2/3098     | NA                         | R01_cb1113_c2/f2p2/3098     | NA                          | R01_cb1113_c2/f2p2/3098     |
| R01_cb16935_c0/flp0/1450    | NA                         | NA                          | R01_cb16935_c0/flp0/1450    | R01_cb16935_c0/flp0/1450    |
| R01_cb8564_c70849/flp0/4109 | NA                         | R01_cb8564_c70849/flp0/4109 | NA                          | NA                          |
| R01_cb5090_c6/flp0/2471     | NA                         | NA                          | NA                          | R01_cb5090_c6/flp0/2471     |
| R01_cb18456_c6671/flp0/532  | R01_cb18456_c6671/flp0/532 | R01_cb18456_c6671/flp0/532  | R01_cb18456_c6671/flp0/532  | R01_cb18456_c6671/flp0/532  |
| R01_cb14254_c0/flp0/871     | NA                         | R01_cb14254_c0/flp0/871     | NA                          | R01_cb14254_c0/flp0/871     |
| R01_cb9376_c0/flp0/2100     | R01_cb9376_c0/flp0/2100    | R01_cb9376_c0/flp0/2100     | NA                          | NA                          |
| R01_cb11850_c10/f4p0/485    | NA                         | R01_cb11850_c10/f4p0/485    | NA                          | NA                          |



|                              |                             |                              |                              |                              |
|------------------------------|-----------------------------|------------------------------|------------------------------|------------------------------|
| R01_cb2253_c9/flp1/1001      | NA                          | R01_cb2253_c9/flp1/1001      | NA                           | NA                           |
| R01_cb15436_c2/flp1/750      | NA                          | NA                           | NA                           | R01_cb15436_c2/flp1/750      |
| R01_cb3863_c2/flp0/3505      | NA                          | NA                           | NA                           | R01_cb3863_c2/flp0/3505      |
| R01_cb8564_c10976/flp0/4679  | R01_cb8564_c10976/flp0/4679 | R01_cb8564_c10976/flp0/4679  | NA                           | NA                           |
| R01_cb8564_c79071/flp0/1947  | R01_cb8564_c79071/flp0/1947 | R01_cb8564_c79071/flp0/1947  | R01_cb8564_c79071/flp0/1947  | R01_cb8564_c79071/flp0/1947  |
| R01_cb17558_c0/f3p0/781      | R01_cb17558_c0/f3p0/781     | R01_cb17558_c0/f3p0/781      | R01_cb17558_c0/f3p0/781      | R01_cb17558_c0/f3p0/781      |
| R01_cb1969_c4/flp0/1750      | R01_cb1969_c4/flp0/1750     | R01_cb1969_c4/flp0/1750      | R01_cb1969_c4/flp0/1750      | R01_cb1969_c4/flp0/1750      |
| R01_cb8564_c159669/flp1/2190 | NA                          | R01_cb8564_c159669/flp1/2190 | R01_cb8564_c159669/flp1/2190 | R01_cb8564_c159669/flp1/2190 |
| R01_cb218_c15/flp0/4605      | NA                          | NA                           | NA                           | R01_cb218_c15/flp0/4605      |
| R01_cb8849_c1/flp0/2395      | NA                          | NA                           | NA                           | R01_cb8849_c1/flp0/2395      |
| R01_cb18286_c0/flp0/1126     | NA                          | R01_cb18286_c0/flp0/1126     | R01_cb18286_c0/flp0/1126     | R01_cb18286_c0/flp0/1126     |
| R01_cb3564_c12/flp0/3482     | NA                          | NA                           | NA                           | R01_cb3564_c12/flp0/3482     |
| R01_cb8564_c15671/flp0/3039  | NA                          | R01_cb8564_c15671/flp0/3039  | NA                           | NA                           |
| R01_cb14869_c3/flp0/896      | NA                          | NA                           | R01_cb14869_c3/flp0/896      | R01_cb14869_c3/flp0/896      |
| R01_cb14816_c10/flp0/640     | R01_cb14816_c10/flp0/640    | R01_cb14816_c10/flp0/640     | R01_cb14816_c10/flp0/640     | R01_cb14816_c10/flp0/640     |
| R01_cb15151_c1/flp0/967      | NA                          | NA                           | R01_cb15151_c1/flp0/967      | R01_cb15151_c1/flp0/967      |
| R01_cb10089_c9/flp1/1077     | NA                          | R01_cb10089_c9/flp1/1077     | NA                           | NA                           |
| R01_cb15894_c0/flp0/927      | R01_cb15894_c0/flp0/927     | R01_cb15894_c0/flp0/927      | R01_cb15894_c0/flp0/927      | R01_cb15894_c0/flp0/927      |
| R01_cb8779_c8/flp0/2841      | NA                          | NA                           | NA                           | R01_cb8779_c8/flp0/2841      |
| R01_cb5633_c11/f5p1/2057     | R01_cb5633_c11/f5p1/2057    | R01_cb5633_c11/f5p1/2057     | NA                           | R01_cb5633_c11/f5p1/2057     |
| R01_cb7836_c5/flp0/1885      | NA                          | NA                           | NA                           | R01_cb7836_c5/flp0/1885      |
| R01_cb17127_c4/flp0/7136     | NA                          | R01_cb17127_c4/flp0/7136     | NA                           | R01_cb17127_c4/flp0/7136     |
| R01_cb92_c4/flp0/2333        | NA                          | NA                           | NA                           | R01_cb92_c4/flp0/2333        |

|                              |                          |                              |                             |                              |
|------------------------------|--------------------------|------------------------------|-----------------------------|------------------------------|
| R01_cb12743_c3/flp0/1050     | NA                       | NA                           | NA                          | R01_cb12743_c3/flp0/1050     |
| R01_cb1656_c16/flp0/3581     | R01_cb1656_c16/flp0/3581 | R01_cb1656_c16/flp0/3581     | NA                          | NA                           |
| R01_cb8564_c109387/f4p0/2127 | NA                       | NA                           | NA                          | R01_cb8564_c109387/f4p0/2127 |
| R01_cb10583_c1/flp0/3015     | NA                       | R01_cb10583_c1/flp0/3015     | NA                          | R01_cb10583_c1/flp0/3015     |
| R01_cb8475_c6/flp0/647       | NA                       | R01_cb8475_c6/flp0/647       | NA                          | R01_cb8475_c6/flp0/647       |
| R01_cb14805_c6/flp0/738      | R01_cb14805_c6/flp0/738  | R01_cb14805_c6/flp0/738      | NA                          | NA                           |
| R01_cb12973_c22/flp0/453     | NA                       | R01_cb12973_c22/flp0/453     | NA                          | NA                           |
| R01_cb8564_c17933/flp0/2278  | NA                       | NA                           | NA                          | R01_cb8564_c17933/flp0/2278  |
| R01_cb14179_c5/f4p1/491      | NA                       | NA                           | NA                          | R01_cb14179_c5/f4p1/491      |
| R01_cb6719_c81/flp0/2048     | R01_cb6719_c81/flp0/2048 | R01_cb6719_c81/flp0/2048     | R01_cb6719_c81/flp0/2048    | R01_cb6719_c81/flp0/2048     |
| R01_cb2367_c3/flp0/3067      | R01_cb2367_c3/flp0/3067  | R01_cb2367_c3/flp0/3067      | R01_cb2367_c3/flp0/3067     | NA                           |
| R01_cb9606_c90/flp0/1361     | NA                       | R01_cb9606_c90/flp0/1361     | NA                          | R01_cb9606_c90/flp0/1361     |
| R01_cb6608_c15/flp0/2369     | NA                       | NA                           | NA                          | R01_cb6608_c15/flp0/2369     |
| R01_cb17814_c1/flp1/657      | NA                       | R01_cb17814_c1/flp1/657      | R01_cb17814_c1/flp1/657     | R01_cb17814_c1/flp1/657      |
| R01_cb8564_c11499/flp1/2333  | NA                       | NA                           | R01_cb8564_c11499/flp1/2333 | NA                           |
| R01_cb8104_c1/flp0/2460      | NA                       | NA                           | NA                          | R01_cb8104_c1/flp0/2460      |
| R01_cb12505_c8/flp0/815      | NA                       | R01_cb12505_c8/flp0/815      | NA                          | NA                           |
| R01_cb10505_c2/flp0/3676     | R01_cb10505_c2/flp0/3676 | R01_cb10505_c2/flp0/3676     | NA                          | NA                           |
| R01_cb8548_c2/flp0/2336      | NA                       | R01_cb8548_c2/flp0/2336      | NA                          | NA                           |
| R01_cb15846_c2/flp1/1565     | NA                       | R01_cb15846_c2/flp1/1565     | NA                          | NA                           |
| R01_cb8564_c120421/flp0/3623 | NA                       | R01_cb8564_c120421/flp0/3623 | NA                          | NA                           |
| R01_cb17973_c50/flp0/842     | NA                       | R01_cb17973_c50/flp0/842     | R01_cb17973_c50/flp0/842    | R01_cb17973_c50/flp0/842     |
| R01_cb8564_c70829/flp0/3036  | NA                       | NA                           | R01_cb8564_c70829/flp0/3036 | NA                           |
| R01_cb16861_c0/f2p0/768      | NA                       | R01_cb16861_c0/f2p0/768      | NA                          | NA                           |

|                              |                             |                              |                            |                             |
|------------------------------|-----------------------------|------------------------------|----------------------------|-----------------------------|
| R01_cb8564_c23584/f1p4/2247  | NA                          | NA                           | NA                         | R01_cb8564_c23584/f1p4/2247 |
| R01_cb9759_c1/f2p1/1826      | NA                          | NA                           | NA                         | R01_cb9759_c1/f2p1/1826     |
| R01_cb10880_c8/f1p0/773      | NA                          | R01_cb10880_c8/f1p0/773      | NA                         | R01_cb10880_c8/f1p0/773     |
| R01_cb8564_c2561/f1p0/2609   | NA                          | R01_cb8564_c2561/f1p0/2609   | R01_cb8564_c2561/f1p0/2609 | NA                          |
| R01_cb18456_c2505/f1p0/488   | R01_cb18456_c2505/f1p0/488  | R01_cb18456_c2505/f1p0/488   | R01_cb18456_c2505/f1p0/488 | R01_cb18456_c2505/f1p0/488  |
| R01_cb8564_c89631/f1p0/2976  | R01_cb8564_c89631/f1p0/2976 | R01_cb8564_c89631/f1p0/2976  | NA                         | R01_cb8564_c89631/f1p0/2976 |
| R01_cb16261_c2/f1p0/1266     | R01_cb16261_c2/f1p0/1266    | R01_cb16261_c2/f1p0/1266     | R01_cb16261_c2/f1p0/1266   | R01_cb16261_c2/f1p0/1266    |
| R01_cb8564_c123784/f1p0/2528 | NA                          | R01_cb8564_c123784/f1p0/2528 | NA                         | NA                          |
| R01_cb9729_c4/f1p0/1602      | R01_cb9729_c4/f1p0/1602     | R01_cb9729_c4/f1p0/1602      | R01_cb9729_c4/f1p0/1602    | R01_cb9729_c4/f1p0/1602     |
| R01_cb2045_c15/f4p1/2535     | NA                          | NA                           | NA                         | R01_cb2045_c15/f4p1/2535    |
| R01_cb6606_c8/f1p0/2513      | NA                          | NA                           | NA                         | R01_cb6606_c8/f1p0/2513     |
| R01_cb8564_c66201/f2p1/2384  | NA                          | R01_cb8564_c66201/f2p1/2384  | NA                         | R01_cb8564_c66201/f2p1/2384 |
| R01_cb10475_c3/f1p0/1463     | NA                          | R01_cb10475_c3/f1p0/1463     | NA                         | R01_cb10475_c3/f1p0/1463    |
| R01_cb7494_c2/f1p0/574       | R01_cb7494_c2/f1p0/574      | R01_cb7494_c2/f1p0/574       | R01_cb7494_c2/f1p0/574     | R01_cb7494_c2/f1p0/574      |
| R01_cb7254_c5/f1p0/1881      | NA                          | NA                           | NA                         | R01_cb7254_c5/f1p0/1881     |
| R01_cb17354_c0/f2p1/1179     | NA                          | NA                           | NA                         | R01_cb17354_c0/f2p1/1179    |
| R01_cb8564_c3008/f1p0/2656   | NA                          | NA                           | NA                         | R01_cb8564_c3008/f1p0/2656  |
| R01_cb13289_c13/f2p2/1692    | NA                          | NA                           | R01_cb13289_c13/f2p2/1692  | NA                          |
| R01_cb11045_c0/f2p0/1862     | NA                          | R01_cb11045_c0/f2p0/1862     | NA                         | NA                          |
| R01_cb8564_c124678/f1p1/2933 | NA                          | R01_cb8564_c124678/f1p1/2933 | NA                         | NA                          |
| R01_cb3630_c1/f1p0/3551      | NA                          | NA                           | R01_cb3630_c1/f1p0/3551    | R01_cb3630_c1/f1p0/3551     |
| R01_cb16092_c2/f2p0/508      | R01_cb16092_c2/f2p0/508     | R01_cb16092_c2/f2p0/508      | R01_cb16092_c2/f2p0/508    | R01_cb16092_c2/f2p0/508     |
| R01_cb17486_c2/f1p0/569      | NA                          | R01_cb17486_c2/f1p0/569      | NA                         | R01_cb17486_c2/f1p0/569     |

|                              |                          |                          |                          |                              |
|------------------------------|--------------------------|--------------------------|--------------------------|------------------------------|
| R01_cb9763_c17/flp0/1715     | NA                       | R01_cb9763_c17/flp0/1715 | NA                       | NA                           |
| R01_cb10750_c1/flp0/1977     | R01_cb10750_c1/flp0/1977 | R01_cb10750_c1/flp0/1977 | R01_cb10750_c1/flp0/1977 | R01_cb10750_c1/flp0/1977     |
| R01_cb15188_c2/flp0/1780     | R01_cb15188_c2/flp0/1780 | R01_cb15188_c2/flp0/1780 | NA                       | R01_cb15188_c2/flp0/1780     |
| R01_cb10539_c4/flp2/1124     | NA                       | NA                       | NA                       | R01_cb10539_c4/flp2/1124     |
| R01_cb1487_c2/flp0/3909      | NA                       | NA                       | NA                       | R01_cb1487_c2/flp0/3909      |
| R01_cb10217_c2/flp3/1693     | NA                       | NA                       | NA                       | R01_cb10217_c2/flp3/1693     |
| R01_cb4263_c7/flp0/586       | R01_cb4263_c7/flp0/586   | R01_cb4263_c7/flp0/586   | NA                       | NA                           |
| R01_cb12584_c0/f2p0/1141     | NA                       | NA                       | NA                       | R01_cb12584_c0/f2p0/1141     |
| R01_cb1215_c15/flp0/3339     | NA                       | R01_cb1215_c15/flp0/3339 | NA                       | R01_cb1215_c15/flp0/3339     |
| R01_cb17550_c0/flp0/836      | NA                       | NA                       | R01_cb17550_c0/flp0/836  | R01_cb17550_c0/flp0/836      |
| R01_cb10915_c1/flp0/2132     | NA                       | R01_cb10915_c1/flp0/2132 | NA                       | NA                           |
| R01_cb10145_c6/flp0/1592     | NA                       | NA                       | NA                       | R01_cb10145_c6/flp0/1592     |
| R01_cb4141_c10/flp0/2489     | NA                       | R01_cb4141_c10/flp0/2489 | NA                       | NA                           |
| R01_cb13290_c2/f2p0/715      | NA                       | R01_cb13290_c2/f2p0/715  | NA                       | NA                           |
| R01_cb5223_c4/flp0/2643      | NA                       | R01_cb5223_c4/flp0/2643  | NA                       | NA                           |
| R01_cb14373_c5/flp0/1437     | NA                       | R01_cb14373_c5/flp0/1437 | R01_cb14373_c5/flp0/1437 | R01_cb14373_c5/flp0/1437     |
| R01_cb7544_c3/flp0/1896      | NA                       | R01_cb7544_c3/flp0/1896  | NA                       | NA                           |
| R01_cb8564_c128749/flp0/2577 | NA                       | NA                       | NA                       | R01_cb8564_c128749/flp0/2577 |
| R01_cb3344_c8/flp1/2760      | NA                       | NA                       | NA                       | R01_cb3344_c8/flp1/2760      |
| R01_cb11017_c1/flp0/2135     | NA                       | R01_cb11017_c1/flp0/2135 | R01_cb11017_c1/flp0/2135 | R01_cb11017_c1/flp0/2135     |
| R01_cb1333_c84/flp0/3338     | NA                       | R01_cb1333_c84/flp0/3338 | R01_cb1333_c84/flp0/3338 | R01_cb1333_c84/flp0/3338     |
| R01_cb16230_c1/flp0/915      | R01_cb16230_c1/flp0/915  | R01_cb16230_c1/flp0/915  | R01_cb16230_c1/flp0/915  | R01_cb16230_c1/flp0/915      |
| R01_cb7587_c1/flp0/2581      | NA                       | R01_cb7587_c1/flp0/2581  | NA                       | NA                           |
| R01_cb16172_c4/flp0/5261     | R01_cb16172_c4/flp0/5261 | R01_cb16172_c4/flp0/5261 | R01_cb16172_c4/flp0/5261 | NA                           |
| R01_cb11037_c0/flp0/943      | NA                       | NA                       | NA                       | R01_cb11037_c0/flp0/943      |

|                             |                             |                             |                             |                             |
|-----------------------------|-----------------------------|-----------------------------|-----------------------------|-----------------------------|
| R01_cb10787_c6/f2p0/1136    | NA                          | NA                          | NA                          | R01_cb10787_c6/f2p0/1136    |
| R01_cb2952_c2/f1p0/2978     | NA                          | R01_cb2952_c2/f1p0/2978     | NA                          | NA                          |
| R01_cb13585_c6/f1p0/1002    | NA                          | R01_cb13585_c6/f1p0/1002    | R01_cb13585_c6/f1p0/1002    | R01_cb13585_c6/f1p0/1002    |
| R01_cb218_c7/f1p0/4552      | NA                          | NA                          | NA                          | R01_cb218_c7/f1p0/4552      |
| R01_cb14068_c2/f1p0/1091    | NA                          | R01_cb14068_c2/f1p0/1091    | NA                          | NA                          |
| R01_cb8564_c40333/f1p2/4446 | NA                          | NA                          | NA                          | R01_cb8564_c40333/f1p2/4446 |
| R01_cb18456_c6928/f1p0/498  | R01_cb18456_c6928/f1p0/498  | R01_cb18456_c6928/f1p0/498  | R01_cb18456_c6928/f1p0/498  | R01_cb18456_c6928/f1p0/498  |
| R01_cb14301_c0/f4p0/508     | NA                          | R01_cb14301_c0/f4p0/508     | NA                          | NA                          |
| R01_cb1377_c1/f1p0/2050     | NA                          | NA                          | NA                          | R01_cb1377_c1/f1p0/2050     |
| R01_cb8564_c121637/f1p0/330 | NA                          | R01_cb8564_c121637/f1p0/330 | NA                          | R01_cb8564_c121637/f1p0/330 |
| 5                           |                             | 5                           |                             | 5                           |
| R01_cb15207_c2/f4p3/735     | NA                          | R01_cb15207_c2/f4p3/735     | NA                          | NA                          |
| R01_cb8564_c37416/f1p0/2155 | R01_cb8564_c37416/f1p0/2155 | R01_cb8564_c37416/f1p0/2155 | R01_cb8564_c37416/f1p0/2155 | R01_cb8564_c37416/f1p0/2155 |
|                             | 5                           |                             |                             |                             |
| R01_cb1259_c14/f1p0/3145    | NA                          | NA                          | NA                          | R01_cb1259_c14/f1p0/3145    |
| R01_cb10970_c11/f1p0/1730   | NA                          | NA                          | NA                          | R01_cb10970_c11/f1p0/1730   |
| R01_cb8564_c42417/f1p0/2894 | NA                          | R01_cb8564_c42417/f1p0/2894 | NA                          | R01_cb8564_c42417/f1p0/2894 |
| R01_cb8564_c44931/f1p0/4411 | NA                          | R01_cb8564_c44931/f1p0/4411 | NA                          | NA                          |
| R01_cb9617_c9/f1p0/1935     | NA                          | NA                          | NA                          | R01_cb9617_c9/f1p0/1935     |
| R01_cb13392_c12/f1p0/964    | NA                          | R01_cb13392_c12/f1p0/964    | NA                          | NA                          |
| R01_cb6507_c12/f1p0/913     | NA                          | NA                          | NA                          | R01_cb6507_c12/f1p0/913     |
| R01_cb1998_c3/f1p0/2873     | NA                          | R01_cb1998_c3/f1p0/2873     | R01_cb1998_c3/f1p0/2873     | R01_cb1998_c3/f1p0/2873     |
| R01_cb15353_c0/f1p0/1386    | NA                          | NA                          | NA                          | R01_cb15353_c0/f1p0/1386    |
| R01_cb8020_c0/f1p0/2479     | R01_cb8020_c0/f1p0/2479     | R01_cb8020_c0/f1p0/2479     | R01_cb8020_c0/f1p0/2479     | R01_cb8020_c0/f1p0/2479     |
| R01_cb897_c17/f1p0/3323     | NA                          | R01_cb897_c17/f1p0/3323     | NA                          | R01_cb897_c17/f1p0/3323     |
| R01_cb8713_c1/f1p0/2286     | NA                          | R01_cb8713_c1/f1p0/2286     | NA                          | NA                          |

|                             |                            |                             |                            |                             |
|-----------------------------|----------------------------|-----------------------------|----------------------------|-----------------------------|
| R01_cb1800_c5/flp1/2166     | NA                         | NA                          | NA                         | R01_cb1800_c5/flp1/2166     |
| R01_cb17196_c2/flp0/333     | R01_cb17196_c2/flp0/333    | R01_cb17196_c2/flp0/333     | R01_cb17196_c2/flp0/333    | R01_cb17196_c2/flp0/333     |
| R01_cb7533_c12/flp0/2253    | NA                         | NA                          | NA                         | R01_cb7533_c12/flp0/2253    |
| R01_cb10398_c5/flp0/1033    | NA                         | R01_cb10398_c5/flp0/1033    | NA                         | R01_cb10398_c5/flp0/1033    |
| R01_cb6823_c4/flp0/1086     | NA                         | NA                          | NA                         | R01_cb6823_c4/flp0/1086     |
| R01_cb8564_c86799/flp0/2117 | NA                         | R01_cb8564_c86799/flp0/2117 | NA                         | R01_cb8564_c86799/flp0/2117 |
| R01_cb8564_c2586/flp0/3527  | NA                         | R01_cb8564_c2586/flp0/3527  | NA                         | R01_cb8564_c2586/flp0/3527  |
| R01_cb9972_c3/flp0/1160     | R01_cb9972_c3/flp0/1160    | R01_cb9972_c3/flp0/1160     | NA                         | NA                          |
| R01_cb12602_c0/flp0/1745    | NA                         | R01_cb12602_c0/flp0/1745    | NA                         | R01_cb12602_c0/flp0/1745    |
| R01_cb8023_c13/flp0/1364    | NA                         | NA                          | R01_cb8023_c13/flp0/1364   | R01_cb8023_c13/flp0/1364    |
| R01_cb18456_c6737/flp4/765  | NA                         | R01_cb18456_c6737/flp4/765  | NA                         | NA                          |
| R01_cb6945_c2/flp1/1785     | R01_cb6945_c2/flp1/1785    | NA                          | NA                         | R01_cb6945_c2/flp1/1785     |
| R01_cb13386_c14/flp0/455    | R01_cb13386_c14/flp0/455   | R01_cb13386_c14/flp0/455    | NA                         | NA                          |
| R01_cb18456_c1682/f2p0/573  | R01_cb18456_c1682/f2p0/573 | R01_cb18456_c1682/f2p0/573  | R01_cb18456_c1682/f2p0/573 | R01_cb18456_c1682/f2p0/573  |
| R01_cb13726_c3/flp0/861     | NA                         | NA                          | NA                         | R01_cb13726_c3/flp0/861     |
| R01_cb11343_c3/flp1/1815    | NA                         | NA                          | NA                         | R01_cb11343_c3/flp1/1815    |
| R01_cb18574_c1/flp0/855     | NA                         | NA                          | NA                         | R01_cb18574_c1/flp0/855     |
| R01_cb15491_c2/flp0/1656    | NA                         | NA                          | NA                         | R01_cb15491_c2/flp0/1656    |
| R01_cb3483_c14/flp0/2857    | NA                         | NA                          | NA                         | R01_cb3483_c14/flp0/2857    |
| R01_cb18393_c1/flp0/1743    | R01_cb18393_c1/flp0/1743   | R01_cb18393_c1/flp0/1743    | R01_cb18393_c1/flp0/1743   | R01_cb18393_c1/flp0/1743    |
| R01_cb8751_c4/flp0/2162     | NA                         | NA                          | NA                         | R01_cb8751_c4/flp0/2162     |
| R01_cb781_c29/flp0/2108     | NA                         | NA                          | NA                         | R01_cb781_c29/flp0/2108     |
| R01_cb13662_c3/flp0/641     | R01_cb13662_c3/flp0/641    | R01_cb13662_c3/flp0/641     | NA                         | R01_cb13662_c3/flp0/641     |
| R01_cb2061_c4/flp0/4072     | NA                         | R01_cb2061_c4/flp0/4072     | NA                         | NA                          |
| R01_cb8564_c161243/flp0/273 | NA                         | R01_cb8564_c161243/flp0/273 | NA                         | NA                          |
| 1                           |                            | 1                           |                            |                             |

|                                  |                           |                                  |                           |                                  |
|----------------------------------|---------------------------|----------------------------------|---------------------------|----------------------------------|
| R01_cb8564_c115196/flp0/234<br>1 | NA                        | NA                               | NA                        | R01_cb8564_c115196/flp0/234<br>1 |
| R01_cb14209_c2/flp0/760          | NA                        | NA                               | R01_cb14209_c2/flp0/760   | R01_cb14209_c2/flp0/760          |
| R01_cb16447_c10/fl15p3/905       | NA                        | NA                               | NA                        | R01_cb16447_c10/fl15p3/905       |
| R01_cb8564_c1510/flp0/2041       | NA                        | R01_cb8564_c1510/flp0/2041       | NA                        | NA                               |
| R01_cb14664_c5/flp0/1279         | NA                        | R01_cb14664_c5/flp0/1279         | NA                        | NA                               |
| R01_cb2204_c2/flp0/2049          | R01_cb2204_c2/flp0/2049   | R01_cb2204_c2/flp0/2049          | R01_cb2204_c2/flp0/2049   | R01_cb2204_c2/flp0/2049          |
| R01_cb14770_c3/f3p0/1056         | NA                        | NA                               | NA                        | R01_cb14770_c3/f3p0/1056         |
| R01_cb12114_c11/flp0/1029        | NA                        | NA                               | NA                        | R01_cb12114_c11/flp0/1029        |
| R01_cb18409_c124/flp0/397        | R01_cb18409_c124/flp0/397 | R01_cb18409_c124/flp0/397        | R01_cb18409_c124/flp0/397 | R01_cb18409_c124/flp0/397        |
| R01_cb9287_c3/flp0/705           | R01_cb9287_c3/flp0/705    | R01_cb9287_c3/flp0/705           | R01_cb9287_c3/flp0/705    | R01_cb9287_c3/flp0/705           |
| R01_cb18456_c825/flp7/800        | NA                        | R01_cb18456_c825/flp7/800        | NA                        | NA                               |
| R01_cb9507_c4/flp0/523           | R01_cb9507_c4/flp0/523    | R01_cb9507_c4/flp0/523           | R01_cb9507_c4/flp0/523    | R01_cb9507_c4/flp0/523           |
| R01_cb18353_c0/flp0/1355         | NA                        | R01_cb18353_c0/flp0/1355         | R01_cb18353_c0/flp0/1355  | R01_cb18353_c0/flp0/1355         |
| R01_cb16665_c3/flp0/1004         | NA                        | NA                               | R01_cb16665_c3/flp0/1004  | R01_cb16665_c3/flp0/1004         |
| R01_cb13230_c0/f5p0/640          | NA                        | R01_cb13230_c0/f5p0/640          | NA                        | NA                               |
| R01_cb1683_c33/flp0/2889         | NA                        | R01_cb1683_c33/flp0/2889         | NA                        | NA                               |
| R01_cb8564_c52452/flp0/3727      | NA                        | R01_cb8564_c52452/flp0/3727      | NA                        | NA                               |
| R01_cb8564_c118043/flp0/261<br>3 | NA                        | R01_cb8564_c118043/flp0/261<br>3 | NA                        | NA                               |
| R01_cb14125_c120/flp0/602        | NA                        | NA                               | R01_cb14125_c120/flp0/602 | NA                               |
| R01_cb16071_c0/flp0/1005         | R01_cb16071_c0/flp0/1005  | R01_cb16071_c0/flp0/1005         | NA                        | R01_cb16071_c0/flp0/1005         |
| R01_cb302_c5/flp3/3518           | NA                        | NA                               | NA                        | R01_cb302_c5/flp3/3518           |
| R01_cb1161_c6/flp0/1574          | NA                        | NA                               | NA                        | R01_cb1161_c6/flp0/1574          |
| R01_cb2022_c19/flp0/1643         | NA                        | NA                               | NA                        | R01_cb2022_c19/flp0/1643         |
| R01_cb5443_c4/flp0/2834          | R01_cb5443_c4/flp0/2834   | R01_cb5443_c4/flp0/2834          | NA                        | NA                               |

|                             |                             |                             |                             |                             |
|-----------------------------|-----------------------------|-----------------------------|-----------------------------|-----------------------------|
| R01_cb8564_c85517/flp0/2859 | NA                          | NA                          | NA                          | R01_cb8564_c85517/flp0/2859 |
| R01_cb10238_c4/flp0/381     | R01_cb10238_c4/flp0/381     | R01_cb10238_c4/flp0/381     | NA                          | NA                          |
| R01_cb6181_c55/flp1/2098    | NA                          | R01_cb6181_c55/flp1/2098    | NA                          | NA                          |
| R01_cb9897_c7/flp1/1738     | NA                          | R01_cb9897_c7/flp1/1738     | NA                          | NA                          |
| R01_cb381_c1/flp0/3954      | NA                          | R01_cb381_c1/flp0/3954      | NA                          | NA                          |
| R01_cb14905_c0/flp0/590     | NA                          | NA                          | R01_cb14905_c0/flp0/590     | R01_cb14905_c0/flp0/590     |
| R01_cb8564_c1323/flp1/2810  | NA                          | NA                          | NA                          | R01_cb8564_c1323/flp1/2810  |
| R01_cb13886_c2/flp0/510     | NA                          | R01_cb13886_c2/flp0/510     | NA                          | NA                          |
| R01_cb8991_c4/flp0/2079     | NA                          | NA                          | NA                          | R01_cb8991_c4/flp0/2079     |
| R01_cb4036_c3/flp1/2063     | NA                          | R01_cb4036_c3/flp1/2063     | NA                          | NA                          |
| R01_cb8564_c85325/flp0/2780 | R01_cb8564_c85325/flp0/2780 | R01_cb8564_c85325/flp0/2780 | R01_cb8564_c85325/flp0/2780 | NA                          |
| R01_cb8564_c82130/flp0/4463 | NA                          | R01_cb8564_c82130/flp0/4463 | NA                          | R01_cb8564_c82130/flp0/4463 |
| R01_cb15418_c5/flp1/1059    | NA                          | NA                          | NA                          | R01_cb15418_c5/flp1/1059    |
| R01_cb8564_c76139/flp0/2005 | NA                          | R01_cb8564_c76139/flp0/2005 | R01_cb8564_c76139/flp0/2005 | R01_cb8564_c76139/flp0/2005 |
| R01_cb8564_c86161/f2p0/2876 | NA                          | R01_cb8564_c86161/f2p0/2876 | NA                          | NA                          |
| R01_cb18409_c149/flp0/501   | NA                          | R01_cb18409_c149/flp0/501   | NA                          | NA                          |
| R01_cb8564_c68745/f3p0/2856 | NA                          | R01_cb8564_c68745/f3p0/2856 | NA                          | NA                          |
| R01_cb8564_c24818/flp0/1944 | NA                          | R01_cb8564_c24818/flp0/1944 | NA                          | NA                          |
| R01_cb18456_c7122/flp0/415  | NA                          | R01_cb18456_c7122/flp0/415  | R01_cb18456_c7122/flp0/415  | R01_cb18456_c7122/flp0/415  |
| R01_cb9292_c21/flp0/778     | R01_cb9292_c21/flp0/778     | R01_cb9292_c21/flp0/778     | NA                          | R01_cb9292_c21/flp0/778     |
| R01_cb15093_c1/flp0/1775    | NA                          | NA                          | NA                          | R01_cb15093_c1/flp0/1775    |
| R01_cb8564_c69618/flp0/2659 | NA                          | NA                          | NA                          | R01_cb8564_c69618/flp0/2659 |
| R01_cb6682_c6/flp1/2237     | NA                          | R01_cb6682_c6/flp1/2237     | NA                          | NA                          |
| R01_cb13430_c0/flp0/1552    | NA                          | NA                          | R01_cb13430_c0/flp0/1552    | R01_cb13430_c0/flp0/1552    |
| R01_cb10230_c6/f3p0/478     | NA                          | R01_cb10230_c6/f3p0/478     | NA                          | NA                          |



|                             |                             |                             |                             |                             |
|-----------------------------|-----------------------------|-----------------------------|-----------------------------|-----------------------------|
| R01_cb12397_c0/flp0/788     | R01_cb12397_c0/flp0/788     | R01_cb12397_c0/flp0/788     | R01_cb12397_c0/flp0/788     | NA                          |
| R01_cb15155_c0/flp0/942     | NA                          | R01_cb15155_c0/flp0/942     | NA                          | NA                          |
| R01_cb8564_c69996/flp0/2880 | NA                          | R01_cb8564_c69996/flp0/2880 | NA                          | NA                          |
| R01_cb14344_c0/flp0/900     | R01_cb14344_c0/flp0/900     | R01_cb14344_c0/flp0/900     | R01_cb14344_c0/flp0/900     | R01_cb14344_c0/flp0/900     |
| R01_cb6602_c40/flp0/3304    | NA                          | NA                          | NA                          | R01_cb6602_c40/flp0/3304    |
| R01_cb9154_c16/flp0/1122    | NA                          | NA                          | NA                          | R01_cb9154_c16/flp0/1122    |
| R01_cb15950_c1/f2p1/1352    | NA                          | NA                          | NA                          | R01_cb15950_c1/f2p1/1352    |
| R01_cb4233_c198/flp0/2372   | NA                          | NA                          | R01_cb4233_c198/flp0/2372   | R01_cb4233_c198/flp0/2372   |
| R01_cb8564_c124170/flp0/199 | R01_cb8564_c124170/flp0/199 | R01_cb8564_c124170/flp0/199 | NA                          | R01_cb8564_c124170/flp0/199 |
| 9                           | 99                          | 9                           | NA                          | 9                           |
| R01_cb8564_c15807/flp1/2210 | NA                          | R01_cb8564_c15807/flp1/2210 | NA                          | NA                          |
| R01_cb7603_c1/flp0/2574     | NA                          | R01_cb7603_c1/flp0/2574     | NA                          | NA                          |
| R01_cb11430_c2/f2p0/704     | NA                          | R01_cb11430_c2/f2p0/704     | NA                          | R01_cb11430_c2/f2p0/704     |
| R01_cb7412_c19/flp0/674     | NA                          | NA                          | NA                          | R01_cb7412_c19/flp0/674     |
| R01_cb8564_c91159/flp0/3159 | NA                          | NA                          | NA                          | R01_cb8564_c91159/flp0/3159 |
| R01_cb8564_c12915/flp1/4387 | NA                          | NA                          | NA                          | R01_cb8564_c12915/flp1/4387 |
| R01_cb13429_c7/flp0/349     | R01_cb13429_c7/flp0/349     | R01_cb13429_c7/flp0/349     | NA                          | NA                          |
| R01_cb12620_c13/flp0/1193   | NA                          | NA                          | NA                          | R01_cb12620_c13/flp0/1193   |
| R01_cb18456_c7108/flp0/504  | NA                          | NA                          | R01_cb18456_c7108/flp0/504  | R01_cb18456_c7108/flp0/504  |
| R01_cb12242_c0/f5p1/886     | NA                          | NA                          | NA                          | R01_cb12242_c0/f5p1/886     |
| R01_cb18337_c2/flp0/1750    | NA                          | R01_cb18337_c2/flp0/1750    | R01_cb18337_c2/flp0/1750    | R01_cb18337_c2/flp0/1750    |
| R01_cb13099_c1/flp0/599     | NA                          | R01_cb13099_c1/flp0/599     | NA                          | NA                          |
| R01_cb8564_c86686/flp0/3278 | NA                          | R01_cb8564_c86686/flp0/3278 | NA                          | R01_cb8564_c86686/flp0/3278 |
| R01_cb16678_c12/flp0/1880   | NA                          | R01_cb16678_c12/flp0/1880   | NA                          | NA                          |
| R01_cb5690_c3/flp0/3019     | NA                          | NA                          | NA                          | R01_cb5690_c3/flp0/3019     |
| R01_cb8564_c10817/flp0/2936 | NA                          | NA                          | R01_cb8564_c10817/flp0/2936 | R01_cb8564_c10817/flp0/2936 |

|                                  |                             |                                  |                                  |                                  |
|----------------------------------|-----------------------------|----------------------------------|----------------------------------|----------------------------------|
| R01_cb13517_c1/flp0/1036         | R01_cb13517_c1/flp0/1036    | NA                               | NA                               | NA                               |
| R01_cb15811_c44/f2p0/929         | NA                          | R01_cb15811_c44/f2p0/929         | R01_cb15811_c44/f2p0/929         | R01_cb15811_c44/f2p0/929         |
| R01_cb16294_c2/f2p0/1067         | NA                          | R01_cb16294_c2/f2p0/1067         | NA                               | R01_cb16294_c2/f2p0/1067         |
| R01_cb17993_c1/flp0/603          | R01_cb17993_c1/flp0/603     | R01_cb17993_c1/flp0/603          | R01_cb17993_c1/flp0/603          | R01_cb17993_c1/flp0/603          |
| R01_cb515_c6/flp0/1914           | NA                          | R01_cb515_c6/flp0/1914           | R01_cb515_c6/flp0/1914           | R01_cb515_c6/flp0/1914           |
| R01_cb8564_c83342/flp0/3084      | NA                          | NA                               | NA                               | R01_cb8564_c83342/flp0/3084      |
| R01_cb8564_c112262/flp0/197<br>1 | NA                          | R01_cb8564_c112262/flp0/197<br>1 | R01_cb8564_c112262/flp0/197<br>1 | NA                               |
| R01_cb8564_c121835/flp0/235<br>1 | NA                          | R01_cb8564_c121835/flp0/235<br>1 | R01_cb8564_c121835/flp0/235<br>1 | R01_cb8564_c121835/flp0/235<br>1 |
| R01_cb2314_c7/flp1/856           | NA                          | R01_cb2314_c7/flp1/856           | NA                               | NA                               |
| R01_cb3071_c0/f2p0/1737          | NA                          | NA                               | NA                               | R01_cb3071_c0/f2p0/1737          |
| R01_cb18655_c6/flp0/1607         | NA                          | R01_cb18655_c6/flp0/1607         | NA                               | NA                               |
| R01_cb12785_c19/flp0/1005        | NA                          | NA                               | R01_cb12785_c19/flp0/1005        | NA                               |
| R01_cb12215_c3/flp0/559          | NA                          | NA                               | R01_cb12215_c3/flp0/559          | R01_cb12215_c3/flp0/559          |
| R01_cb8564_c71985/flp0/4896      | NA                          | NA                               | NA                               | R01_cb8564_c71985/flp0/4896      |
| R01_cb8564_c43803/flp0/2712      | NA                          | R01_cb8564_c43803/flp0/2712      | NA                               | NA                               |
| R01_cb8564_c11823/flp0/4069      | R01_cb8564_c11823/flp0/4069 | R01_cb8564_c11823/flp0/4069      | NA                               | NA                               |
| R01_cb15873_c3/flp0/880          | NA                          | R01_cb15873_c3/flp0/880          | R01_cb15873_c3/flp0/880          | NA                               |
| R01_cb7802_c3/f4p0/2215          | NA                          | NA                               | NA                               | R01_cb7802_c3/f4p0/2215          |
| R01_cb6591_c8/flp0/744           | R01_cb6591_c8/flp0/744      | R01_cb6591_c8/flp0/744           | NA                               | NA                               |
| R01_cb15622_c0/f2p0/782          | NA                          | NA                               | NA                               | R01_cb15622_c0/f2p0/782          |
| R01_cb5635_c0/f2p0/780           | NA                          | NA                               | NA                               | R01_cb5635_c0/f2p0/780           |
| R01_cb12421_c26/flp0/632         | R01_cb12421_c26/flp0/632    | R01_cb12421_c26/flp0/632         | NA                               | NA                               |
| R01_cb8564_c73853/flp0/2443      | NA                          | NA                               | NA                               | R01_cb8564_c73853/flp0/2443      |

|                             |                             |                             |                            |                             |
|-----------------------------|-----------------------------|-----------------------------|----------------------------|-----------------------------|
| R01_cb18456_c4896/flp0/1243 | R01_cb18456_c4896/flp0/1243 | R01_cb18456_c4896/flp0/1243 | NA                         | NA                          |
| R01_cb16362_c0/flp0/1532    | NA                          | NA                          | NA                         | R01_cb16362_c0/flp0/1532    |
| R01_cb8564_c91312/flp0/2845 | NA                          | R01_cb8564_c91312/flp0/2845 | NA                         | NA                          |
| R01_cb8564_c4499/flp0/2986  | NA                          | NA                          | NA                         | R01_cb8564_c4499/flp0/2986  |
| R01_cb3763_c57/flp0/3068    | NA                          | NA                          | NA                         | R01_cb3763_c57/flp0/3068    |
| R01_cb2914_c10/flp0/2828    | NA                          | NA                          | NA                         | R01_cb2914_c10/flp0/2828    |
| R01_cb6348_c7/flp0/2667     | NA                          | NA                          | NA                         | R01_cb6348_c7/flp0/2667     |
| R01_cb6170_c32/flp1/2657    | NA                          | NA                          | NA                         | R01_cb6170_c32/flp1/2657    |
| R01_cb15600_c0/f4p1/592     | NA                          | NA                          | NA                         | R01_cb15600_c0/f4p1/592     |
| R01_cb12393_c3/flp0/780     | NA                          | R01_cb12393_c3/flp0/780     | NA                         | R01_cb12393_c3/flp0/780     |
| R01_cb8564_c77297/flp0/3490 | NA                          | R01_cb8564_c77297/flp0/3490 | NA                         | NA                          |
| R01_cb18456_c6084/flp1/756  | NA                          | NA                          | NA                         | R01_cb18456_c6084/flp1/756  |
| R01_cb8564_c11886/flp0/2921 | NA                          | NA                          | NA                         | R01_cb8564_c11886/flp0/2921 |
| R01_cb7875_c2/flp0/1524     | NA                          | NA                          | NA                         | R01_cb7875_c2/flp0/1524     |
| R01_cb10482_c20/flp0/1368   | NA                          | NA                          | NA                         | R01_cb10482_c20/flp0/1368   |
| R01_cb18456_c4796/flp0/517  | NA                          | R01_cb18456_c4796/flp0/517  | R01_cb18456_c4796/flp0/517 | R01_cb18456_c4796/flp0/517  |
| R01_cb4493_c21/flp4/4506    | NA                          | NA                          | NA                         | R01_cb4493_c21/flp4/4506    |
| R01_cb8564_c69705/flp0/2450 | NA                          | NA                          | NA                         | R01_cb8564_c69705/flp0/2450 |
| R01_cb12421_c73/flp0/609    | R01_cb12421_c73/flp0/609    | R01_cb12421_c73/flp0/609    | NA                         | NA                          |
| R01_cb416_c76/flp1/2886     | NA                          | R01_cb416_c76/flp1/2886     | NA                         | R01_cb416_c76/flp1/2886     |
| R01_cb1686_c10/flp0/1341    | NA                          | NA                          | R01_cb1686_c10/flp0/1341   | R01_cb1686_c10/flp0/1341    |
| R01_cb4198_c5/flp0/2116     | NA                          | NA                          | NA                         | R01_cb4198_c5/flp0/2116     |
| R01_cb14924_c4/f2p0/540     | NA                          | R01_cb14924_c4/f2p0/540     | NA                         | R01_cb14924_c4/f2p0/540     |
| R01_cb11251_c1/flp0/2148    | NA                          | R01_cb11251_c1/flp0/2148    | R01_cb11251_c1/flp0/2148   | R01_cb11251_c1/flp0/2148    |
| R01_cb2583_c1/flp1/3596     | NA                          | R01_cb2583_c1/flp1/3596     | NA                         | NA                          |

|                              |                             |                             |                             |                              |
|------------------------------|-----------------------------|-----------------------------|-----------------------------|------------------------------|
| R01_cb964_c23/flp0/3892      | NA                          | NA                          | NA                          | R01_cb964_c23/flp0/3892      |
| R01_cb17756_c0/f3p0/356      | R01_cb17756_c0/f3p0/356     | R01_cb17756_c0/f3p0/356     | R01_cb17756_c0/f3p0/356     | R01_cb17756_c0/f3p0/356      |
| R01_cb8564_c53550/flp0/2563  | R01_cb8564_c53550/flp0/2563 | R01_cb8564_c53550/flp0/2563 | R01_cb8564_c53550/flp0/2563 | R01_cb8564_c53550/flp0/2563  |
| R01_cb8564_c4097/flp0/2885   | R01_cb8564_c4097/flp0/2885  | R01_cb8564_c4097/flp0/2885  | R01_cb8564_c4097/flp0/2885  | NA                           |
| R01_cb12577_c21/flp1/1024    | NA                          | NA                          | NA                          | R01_cb12577_c21/flp1/1024    |
| R01_cb3426_c5/flp0/3693      | NA                          | NA                          | NA                          | R01_cb3426_c5/flp0/3693      |
| R01_cb18456_c3716/flp0/1590  | NA                          | R01_cb18456_c3716/flp0/1590 | NA                          | R01_cb18456_c3716/flp0/1590  |
| R01_cb8564_c14529/flp0/2680  | NA                          | R01_cb8564_c14529/flp0/2680 | NA                          | NA                           |
| R01_cb12606_c21/flp0/1147    | NA                          | R01_cb12606_c21/flp0/1147   | NA                          | NA                           |
| R01_cb3138_c1/f2p0/586       | NA                          | NA                          | NA                          | R01_cb3138_c1/f2p0/586       |
| R01_cb16537_c2/flp0/584      | R01_cb16537_c2/flp0/584     | R01_cb16537_c2/flp0/584     | NA                          | R01_cb16537_c2/flp0/584      |
| R01_cb15233_c4/flp0/912      | NA                          | NA                          | R01_cb15233_c4/flp0/912     | R01_cb15233_c4/flp0/912      |
| R01_cb6965_c5/flp1/2751      | NA                          | R01_cb6965_c5/flp1/2751     | NA                          | NA                           |
| R01_cb8564_c129021/flp0/3021 | NA                          | NA                          | NA                          | R01_cb8564_c129021/flp0/3021 |
| R01_cb8564_c18362/flp0/1901  | NA                          | NA                          | NA                          | R01_cb8564_c18362/flp0/1901  |
| R01_cb14660_c7/flp0/1442     | NA                          | R01_cb14660_c7/flp0/1442    | NA                          | R01_cb14660_c7/flp0/1442     |
| R01_cb8564_c70265/f2p0/2288  | NA                          | R01_cb8564_c70265/f2p0/2288 | R01_cb8564_c70265/f2p0/2288 | R01_cb8564_c70265/f2p0/2288  |
| R01_cb16160_c2/f2p0/864      | NA                          | R01_cb16160_c2/f2p0/864     | NA                          | NA                           |
| R01_cb8213_c3/flp0/2342      | NA                          | NA                          | NA                          | R01_cb8213_c3/flp0/2342      |
| R01_cb18456_c6451/flp0/1258  | R01_cb18456_c6451/flp0/1258 | R01_cb18456_c6451/flp0/1258 | R01_cb18456_c6451/flp0/1258 | NA                           |
| R01_cb8564_c48200/flp0/2126  | NA                          | R01_cb8564_c48200/flp0/2126 | NA                          | NA                           |
| R01_cb8564_c78274/flp0/3327  | R01_cb8564_c78274/flp0/3327 | R01_cb8564_c78274/flp0/3327 | R01_cb8564_c78274/flp0/3327 | R01_cb8564_c78274/flp0/3327  |

|                             |                             |                             |                             |                             |
|-----------------------------|-----------------------------|-----------------------------|-----------------------------|-----------------------------|
| R01_cb7806_c3/flp0/1914     | NA                          | R01_cb7806_c3/flp0/1914     | R01_cb7806_c3/flp0/1914     | R01_cb7806_c3/flp0/1914     |
| R01_cb1739_c21/flp1/5419    | NA                          | NA                          | NA                          | R01_cb1739_c21/flp1/5419    |
| R01_cb5579_c0/flp0/2937     | NA                          | NA                          | NA                          | R01_cb5579_c0/flp0/2937     |
| R01_cb18456_c5287/flp0/1305 | NA                          | R01_cb18456_c5287/flp0/1305 | NA                          | R01_cb18456_c5287/flp0/1305 |
| R01_cb6615_c4/flp0/2600     | NA                          | NA                          | NA                          | R01_cb6615_c4/flp0/2600     |
| R01_cb8564_c81743/flp0/2364 | R01_cb8564_c81743/flp0/2364 | R01_cb8564_c81743/flp0/2364 | R01_cb8564_c81743/flp0/2364 | R01_cb8564_c81743/flp0/2364 |
| R01_cb8905_c5/flp0/1929     | NA                          | NA                          | NA                          | R01_cb8905_c5/flp0/1929     |
| R01_cb1779_c11/flp0/5053    | NA                          | NA                          | NA                          | R01_cb1779_c11/flp0/5053    |
| R01_cb7296_c3/flp1/2653     | NA                          | NA                          | NA                          | R01_cb7296_c3/flp1/2653     |
| R01_cb16784_c3/flp0/1566    | NA                          | NA                          | NA                          | R01_cb16784_c3/flp0/1566    |
| R01_cb8564_c89731/flp0/3439 | NA                          | R01_cb8564_c89731/flp0/3439 | R01_cb8564_c89731/flp0/3439 | R01_cb8564_c89731/flp0/3439 |
| R01_cb2970_c9/f5p0/510      | NA                          | NA                          | NA                          | R01_cb2970_c9/f5p0/510      |
| R01_cb3103_c2/flp0/649      | R01_cb3103_c2/flp0/649      | R01_cb3103_c2/flp0/649      | NA                          | R01_cb3103_c2/flp0/649      |
| R01_cb2875_c17/flp0/3371    | NA                          | NA                          | NA                          | R01_cb2875_c17/flp0/3371    |
| R01_cb17891_c0/flp0/1291    | NA                          | NA                          | NA                          | R01_cb17891_c0/flp0/1291    |
| R01_cb12821_c3/flp0/613     | NA                          | R01_cb12821_c3/flp0/613     | NA                          | NA                          |
| R01_cb6239_c4/flp0/2736     | NA                          | R01_cb6239_c4/flp0/2736     | NA                          | NA                          |
| R01_cb4685_c2/flp0/3259     | NA                          | R01_cb4685_c2/flp0/3259     | NA                          | R01_cb4685_c2/flp0/3259     |
| R01_cb8882_c1/flp0/3027     | NA                          | R01_cb8882_c1/flp0/3027     | NA                          | NA                          |
| R01_cb17172_c0/flp0/1777    | NA                          | R01_cb17172_c0/flp0/1777    | NA                          | R01_cb17172_c0/flp0/1777    |
| R01_cb16794_c1/flp0/1589    | NA                          | R01_cb16794_c1/flp0/1589    | NA                          | R01_cb16794_c1/flp0/1589    |
| R01_cb2873_c8/flp2/2892     | NA                          | R01_cb2873_c8/flp2/2892     | NA                          | NA                          |
| R01_cb2320_c11/flp0/3551    | NA                          | NA                          | NA                          | R01_cb2320_c11/flp0/3551    |
| R01_cb16964_c2/flp0/1068    | NA                          | R01_cb16964_c2/flp0/1068    | R01_cb16964_c2/flp0/1068    | NA                          |
| R01_cb8564_c39051/flp0/2801 | NA                          | NA                          | NA                          | R01_cb8564_c39051/flp0/2801 |

|                                  |                           |                                  |                           |                                  |
|----------------------------------|---------------------------|----------------------------------|---------------------------|----------------------------------|
| R01_cb7612_c7/flp0/2393          | NA                        | NA                               | NA                        | R01_cb7612_c7/flp0/2393          |
| R01_cb13433_c100/flp0/362        | R01_cb13433_c100/flp0/362 | R01_cb13433_c100/flp0/362        | R01_cb13433_c100/flp0/362 | R01_cb13433_c100/flp0/362        |
| R01_cb17640_c2/flp0/425          | R01_cb17640_c2/flp0/425   | R01_cb17640_c2/flp0/425          | NA                        | R01_cb17640_c2/flp0/425          |
| R01_cb17775_c0/flp0/870          | NA                        | R01_cb17775_c0/flp0/870          | NA                        | R01_cb17775_c0/flp0/870          |
| R01_cb16276_c3/flp0/1333         | NA                        | R01_cb16276_c3/flp0/1333         | NA                        | NA                               |
| R01_cb13577_c0/f3p0/464          | R01_cb13577_c0/f3p0/464   | R01_cb13577_c0/f3p0/464          | R01_cb13577_c0/f3p0/464   | NA                               |
| R01_cb11751_c1/flp0/2086         | NA                        | R01_cb11751_c1/flp0/2086         | NA                        | NA                               |
| R01_cb13459_c1/flp0/970          | NA                        | R01_cb13459_c1/flp0/970          | NA                        | NA                               |
| R01_cb13178_c11/flp1/593         | NA                        | R01_cb13178_c11/flp1/593         | NA                        | NA                               |
| R01_cb10329_c3/flp2/4618         | NA                        | R01_cb10329_c3/flp2/4618         | NA                        | NA                               |
| R01_cb6571_c0/flp0/2817          | NA                        | NA                               | NA                        | R01_cb6571_c0/flp0/2817          |
| R01_cb7819_c1/f2p0/2529          | NA                        | NA                               | NA                        | R01_cb7819_c1/f2p0/2529          |
| R01_cb7639_c16/flp0/5774         | NA                        | R01_cb7639_c16/flp0/5774         | NA                        | NA                               |
| R01_cb454_c35/flp0/2896          | NA                        | NA                               | NA                        | R01_cb454_c35/flp0/2896          |
| R01_cb4870_c2/flp0/3004          | R01_cb4870_c2/flp0/3004   | R01_cb4870_c2/flp0/3004          | R01_cb4870_c2/flp0/3004   | NA                               |
| R01_cb8564_c129342/flp0/275<br>2 | NA                        | NA                               | NA                        | R01_cb8564_c129342/flp0/275<br>2 |
| R01_cb8564_c107886/f2p1/215<br>1 | NA                        | R01_cb8564_c107886/f2p1/215<br>1 | NA                        | R01_cb8564_c107886/f2p1/215<br>1 |
| R01_cb12451_c7/flp0/977          | NA                        | NA                               | NA                        | R01_cb12451_c7/flp0/977          |
| R01_cb16851_c0/f2p0/669          | NA                        | R01_cb16851_c0/f2p0/669          | NA                        | NA                               |
| R01_cb17839_c1/flp0/579          | NA                        | R01_cb17839_c1/flp0/579          | NA                        | R01_cb17839_c1/flp0/579          |
| R01_cb11319_c2/flp0/1052         | R01_cb11319_c2/flp0/1052  | R01_cb11319_c2/flp0/1052         | R01_cb11319_c2/flp0/1052  | R01_cb11319_c2/flp0/1052         |
| R01_cb8564_c50797/flp0/3963      | NA                        | NA                               | NA                        | R01_cb8564_c50797/flp0/3963      |
| R01_cb13856_c2/flp0/700          | NA                        | NA                               | R01_cb13856_c2/flp0/700   | NA                               |
| R01_cb15418_c7/flp1/935          | NA                        | R01_cb15418_c7/flp1/935          | NA                        | R01_cb15418_c7/flp1/935          |

|                             |                           |                             |                             |                             |
|-----------------------------|---------------------------|-----------------------------|-----------------------------|-----------------------------|
| R01_cb10872_c2/flp0/376     | R01_cb10872_c2/flp0/376   | R01_cb10872_c2/flp0/376     | R01_cb10872_c2/flp0/376     | R01_cb10872_c2/flp0/376     |
| R01_cb6990_c9/flp0/652      | NA                        | R01_cb6990_c9/flp0/652      | NA                          | NA                          |
| R01_cb18838_c0/flp0/6091    | NA                        | R01_cb18838_c0/flp0/6091    | NA                          | NA                          |
| R01_cb8564_c49041/flp0/2182 | NA                        | R01_cb8564_c49041/flp0/2182 | R01_cb8564_c49041/flp0/2182 | NA                          |
| R01_cb14444_c0/f3p0/1339    | NA                        | R01_cb14444_c0/f3p0/1339    | R01_cb14444_c0/f3p0/1339    | R01_cb14444_c0/f3p0/1339    |
| R01_cb13890_c0/flp0/1063    | NA                        | NA                          | R01_cb13890_c0/flp0/1063    | R01_cb13890_c0/flp0/1063    |
| R01_cb12240_c12/f51p1/550   | R01_cb12240_c12/f51p1/550 | R01_cb12240_c12/f51p1/550   | NA                          | NA                          |
| R01_cb423_c9/flp0/1743      | NA                        | R01_cb423_c9/flp0/1743      | NA                          | R01_cb423_c9/flp0/1743      |
| R01_cb8564_c83215/flp0/3558 | NA                        | R01_cb8564_c83215/flp0/3558 | NA                          | R01_cb8564_c83215/flp0/3558 |
| R01_cb8356_c4/flp0/661      | NA                        | R01_cb8356_c4/flp0/661      | R01_cb8356_c4/flp0/661      | R01_cb8356_c4/flp0/661      |
| R01_cb8564_c39580/flp0/1920 | NA                        | R01_cb8564_c39580/flp0/1920 | NA                          | R01_cb8564_c39580/flp0/1920 |
| R01_cb10304_c3/flp0/3412    | NA                        | R01_cb10304_c3/flp0/3412    | NA                          | NA                          |
| R01_cb13327_c4/flp0/745     | NA                        | R01_cb13327_c4/flp0/745     | NA                          | NA                          |
| R01_cb15683_c5/flp0/1438    | NA                        | NA                          | NA                          | R01_cb15683_c5/flp0/1438    |
| R01_cb8564_c13379/flp0/4305 | NA                        | NA                          | NA                          | R01_cb8564_c13379/flp0/4305 |
| R01_cb4128_c14/flp1/2357    | NA                        | NA                          | NA                          | R01_cb4128_c14/flp1/2357    |
| R01_cb14723_c1/f3p0/988     | NA                        | NA                          | NA                          | R01_cb14723_c1/f3p0/988     |
| R01_cb2060_c5/flp1/3821     | NA                        | NA                          | NA                          | R01_cb2060_c5/flp1/3821     |
| R01_cb5682_c10/flp0/586     | NA                        | R01_cb5682_c10/flp0/586     | NA                          | R01_cb5682_c10/flp0/586     |
| R01_cb17037_c1/flp0/861     | R01_cb17037_c1/flp0/861   | R01_cb17037_c1/flp0/861     | NA                          | NA                          |
| R01_cb12399_c0/f4p0/474     | NA                        | R01_cb12399_c0/f4p0/474     | NA                          | NA                          |
| R01_cb3846_c4/flp0/3686     | NA                        | R01_cb3846_c4/flp0/3686     | NA                          | NA                          |
| R01_cb17417_c2/flp0/553     | R01_cb17417_c2/flp0/553   | R01_cb17417_c2/flp0/553     | R01_cb17417_c2/flp0/553     | NA                          |
| R01_cb12785_c14/flp0/1127   | NA                        | NA                          | R01_cb12785_c14/flp0/1127   | NA                          |
| R01_cb13667_c2/flp0/880     | R01_cb13667_c2/flp0/880   | R01_cb13667_c2/flp0/880     | R01_cb13667_c2/flp0/880     | R01_cb13667_c2/flp0/880     |
| R01_cb13862_c6/flp0/1233    | NA                        | R01_cb13862_c6/flp0/1233    | R01_cb13862_c6/flp0/1233    | R01_cb13862_c6/flp0/1233    |

|                             |                             |                             |                             |                             |
|-----------------------------|-----------------------------|-----------------------------|-----------------------------|-----------------------------|
| R01_cb2033_c21/f15p0/2349   | NA                          | NA                          | NA                          | R01_cb2033_c21/f15p0/2349   |
| R01_cb18409_c76/f1p0/464    | NA                          | R01_cb18409_c76/f1p0/464    | R01_cb18409_c76/f1p0/464    | R01_cb18409_c76/f1p0/464    |
| R01_cb11872_c4/f1p0/1415    | NA                          | R01_cb11872_c4/f1p0/1415    | NA                          | NA                          |
| R01_cb16345_c2/f1p0/708     | R01_cb16345_c2/f1p0/708     | R01_cb16345_c2/f1p0/708     | NA                          | NA                          |
| R01_cb9993_c4/f1p0/1252     | NA                          | NA                          | NA                          | R01_cb9993_c4/f1p0/1252     |
| R01_cb13910_c7/f1p0/1523    | R01_cb13910_c7/f1p0/1523    | R01_cb13910_c7/f1p0/1523    | R01_cb13910_c7/f1p0/1523    | R01_cb13910_c7/f1p0/1523    |
| R01_cb11140_c0/f1p0/1842    | NA                          | R01_cb11140_c0/f1p0/1842    | R01_cb11140_c0/f1p0/1842    | R01_cb11140_c0/f1p0/1842    |
| R01_cb16072_c0/f2p0/1152    | NA                          | NA                          | NA                          | R01_cb16072_c0/f2p0/1152    |
| R01_cb4732_c0/f1p0/3272     | NA                          | NA                          | NA                          | R01_cb4732_c0/f1p0/3272     |
| R01_cb8564_c74299/f1p0/3003 | R01_cb8564_c74299/f1p0/3003 | R01_cb8564_c74299/f1p0/3003 | R01_cb8564_c74299/f1p0/3003 | R01_cb8564_c74299/f1p0/3003 |
| R01_cb48_c8/f1p2/5695       | NA                          | NA                          | NA                          | R01_cb48_c8/f1p2/5695       |
| R01_cb506_c10/f1p0/2181     | NA                          | R01_cb506_c10/f1p0/2181     | NA                          | R01_cb506_c10/f1p0/2181     |
| R01_cb8640_c5/f1p0/3356     | NA                          | R01_cb8640_c5/f1p0/3356     | NA                          | NA                          |
| R01_cb18456_c1588/f3p1/1236 | NA                          | NA                          | NA                          | R01_cb18456_c1588/f3p1/1236 |
| R01_cb8564_c24335/f1p0/3305 | NA                          | NA                          | NA                          | R01_cb8564_c24335/f1p0/3305 |
| R01_cb2637_c13/f1p0/2273    | NA                          | R01_cb2637_c13/f1p0/2273    | NA                          | NA                          |
| R01_cb15553_c1/f1p0/1633    | NA                          | NA                          | NA                          | R01_cb15553_c1/f1p0/1633    |
| R01_cb2407_c9/f1p0/1111     | NA                          | NA                          | NA                          | R01_cb2407_c9/f1p0/1111     |
| R01_cb6206_c2/f1p0/3233     | NA                          | R01_cb6206_c2/f1p0/3233     | NA                          | NA                          |
| R01_cb17589_c2/f1p0/1728    | NA                          | NA                          | NA                          | R01_cb17589_c2/f1p0/1728    |
| R01_cb12373_c0/f1p0/697     | R01_cb12373_c0/f1p0/697     | R01_cb12373_c0/f1p0/697     | R01_cb12373_c0/f1p0/697     | R01_cb12373_c0/f1p0/697     |
| R01_cb8564_c21952/f1p0/2843 | NA                          | R01_cb8564_c21952/f1p0/2843 | NA                          | NA                          |
| R01_cb16264_c3/f2p1/417     | R01_cb16264_c3/f2p1/417     | R01_cb16264_c3/f2p1/417     | NA                          | R01_cb16264_c3/f2p1/417     |
| R01_cb16118_c0/f2p0/1380    | NA                          | NA                          | NA                          | R01_cb16118_c0/f2p0/1380    |
| R01_cb9775_c1/f1p0/2072     | NA                          | NA                          | NA                          | R01_cb9775_c1/f1p0/2072     |



|                             |                             |                             |                             |                             |
|-----------------------------|-----------------------------|-----------------------------|-----------------------------|-----------------------------|
| R01_cb12716_c2/flp0/625     | NA                          | NA                          | NA                          | R01_cb12716_c2/flp0/625     |
| R01_cb8564_c88809/flp0/2451 | NA                          | R01_cb8564_c88809/flp0/2451 | NA                          | NA                          |
| R01_cb3464_c7/flp0/4610     | NA                          | NA                          | NA                          | R01_cb3464_c7/flp0/4610     |
| R01_cb8564_c126029/flp0/307 | R01_cb8564_c126029/flp0/307 | R01_cb8564_c126029/flp0/307 | R01_cb8564_c126029/flp0/307 | R01_cb8564_c126029/flp0/307 |
| 7                           | 77                          | 7                           | 7                           | 7                           |
| R01_cb7114_c3/f5p1/1295     | NA                          | NA                          | NA                          | R01_cb7114_c3/f5p1/1295     |
| R01_cb5117_c2/flp1/3003     | NA                          | NA                          | NA                          | R01_cb5117_c2/flp1/3003     |
| R01_cb17150_c0/f2p0/832     | R01_cb17150_c0/f2p0/832     | R01_cb17150_c0/f2p0/832     | R01_cb17150_c0/f2p0/832     | R01_cb17150_c0/f2p0/832     |
| R01_cb1675_c5/flp0/2009     | NA                          | NA                          | NA                          | R01_cb1675_c5/flp0/2009     |
| R01_cb3483_c22/flp0/2877    | NA                          | NA                          | NA                          | R01_cb3483_c22/flp0/2877    |
| R01_cb13826_c7/flp0/929     | NA                          | R01_cb13826_c7/flp0/929     | NA                          | NA                          |
| R01_cb8564_c34491/flp0/4804 | NA                          | R01_cb8564_c34491/flp0/4804 | NA                          | NA                          |
| R01_cb9875_c6/flp0/1133     | NA                          | NA                          | NA                          | R01_cb9875_c6/flp0/1133     |
| R01_cb10298_c1/flp0/2692    | NA                          | R01_cb10298_c1/flp0/2692    | NA                          | NA                          |
| R01_cb11244_c0/flp0/1196    | NA                          | R01_cb11244_c0/flp0/1196    | NA                          | NA                          |
| R01_cb17942_c0/flp1/516     | NA                          | R01_cb17942_c0/flp1/516     | NA                          | NA                          |
| R01_cb14271_c0/flp0/1758    | NA                          | R01_cb14271_c0/flp0/1758    | NA                          | NA                          |
| R01_cb14625_c6/flp1/1637    | NA                          | R01_cb14625_c6/flp1/1637    | NA                          | NA                          |
| R01_cb8564_c67827/f7p0/3512 | NA                          | R01_cb8564_c67827/f7p0/3512 | NA                          | NA                          |
| R01_cb8345_c3/flp0/1846     | NA                          | NA                          | NA                          | R01_cb8345_c3/flp0/1846     |
| R01_cb17979_c1/flp0/1255    | NA                          | R01_cb17979_c1/flp0/1255    | NA                          | R01_cb17979_c1/flp0/1255    |
| R01_cb12057_c52/flp0/766    | NA                          | R01_cb12057_c52/flp0/766    | R01_cb12057_c52/flp0/766    | R01_cb12057_c52/flp0/766    |
| R01_cb8564_c1287/flp1/2398  | NA                          | R01_cb8564_c1287/flp1/2398  | NA                          | NA                          |
| R01_cb8564_c86374/flp0/3181 | R01_cb8564_c86374/flp0/3181 | R01_cb8564_c86374/flp0/3181 | R01_cb8564_c86374/flp0/3181 | R01_cb8564_c86374/flp0/3181 |
|                             | 1                           |                             |                             |                             |
| R01_cb3254_c2/flp0/1573     | NA                          | R01_cb3254_c2/flp0/1573     | R01_cb3254_c2/flp0/1573     | R01_cb3254_c2/flp0/1573     |

|                              |                          |                              |                              |                              |
|------------------------------|--------------------------|------------------------------|------------------------------|------------------------------|
| R01_cb10843_c1/f2p0/748      | NA                       | NA                           | NA                           | R01_cb10843_c1/f2p0/748      |
| R01_cb4165_c0/f1p0/3415      | NA                       | NA                           | NA                           | R01_cb4165_c0/f1p0/3415      |
| R01_cb4352_c12/f1p0/2311     | NA                       | NA                           | NA                           | R01_cb4352_c12/f1p0/2311     |
| R01_cb15735_c0/f11p0/402     | R01_cb15735_c0/f11p0/402 | NA                           | NA                           | NA                           |
| R01_cb2298_c3/f1p0/3950      | NA                       | R01_cb2298_c3/f1p0/3950      | NA                           | R01_cb2298_c3/f1p0/3950      |
| R01_cb8564_c118109/f1p0/2145 | NA                       | R01_cb8564_c118109/f1p0/2145 | R01_cb8564_c118109/f1p0/2145 | R01_cb8564_c118109/f1p0/2145 |
| R01_cb18313_c0/f1p0/1037     | NA                       | NA                           | NA                           | R01_cb18313_c0/f1p0/1037     |
| R01_cb6204_c9/f1p3/2742      | NA                       | NA                           | NA                           | R01_cb6204_c9/f1p3/2742      |
| R01_cb17082_c5/f1p0/1165     | R01_cb17082_c5/f1p0/1165 | R01_cb17082_c5/f1p0/1165     | NA                           | NA                           |
| R01_cb15350_c1/f1p0/803      | NA                       | NA                           | NA                           | R01_cb15350_c1/f1p0/803      |
| R01_cb12003_c58/f1p0/1835    | NA                       | R01_cb12003_c58/f1p0/1835    | NA                           | NA                           |
| R01_cb13396_c6/f1p0/1379     | NA                       | R01_cb13396_c6/f1p0/1379     | R01_cb13396_c6/f1p0/1379     | R01_cb13396_c6/f1p0/1379     |
| R01_cb6706_c6/f1p0/1327      | NA                       | NA                           | NA                           | R01_cb6706_c6/f1p0/1327      |
| R01_cb3639_c2/f1p0/5253      | NA                       | NA                           | NA                           | R01_cb3639_c2/f1p0/5253      |
| R01_cb17973_c29/f1p0/619     | NA                       | R01_cb17973_c29/f1p0/619     | R01_cb17973_c29/f1p0/619     | NA                           |
| R01_cb11010_c1/f1p0/4836     | R01_cb11010_c1/f1p0/4836 | R01_cb11010_c1/f1p0/4836     | NA                           | R01_cb11010_c1/f1p0/4836     |
| R01_cb15914_c2/f1p0/865      | NA                       | NA                           | NA                           | R01_cb15914_c2/f1p0/865      |
| R01_cb8564_c112591/f1p0/2670 | NA                       | R01_cb8564_c112591/f1p0/2670 | NA                           | R01_cb8564_c112591/f1p0/2670 |
| R01_cb7419_c9/f1p1/2574      | NA                       | NA                           | NA                           | R01_cb7419_c9/f1p1/2574      |
| R01_cb14741_c1/f1p1/807      | NA                       | NA                           | NA                           | R01_cb14741_c1/f1p1/807      |
| R01_cb4141_c11/f1p0/2811     | NA                       | R01_cb4141_c11/f1p0/2811     | NA                           | NA                           |
| R01_cb11830_c1/f1p0/1919     | NA                       | R01_cb11830_c1/f1p0/1919     | R01_cb11830_c1/f1p0/1919     | R01_cb11830_c1/f1p0/1919     |
| R01_cb3265_c18/f1p0/3071     | NA                       | R01_cb3265_c18/f1p0/3071     | NA                           | NA                           |
| R01_cb5258_c2/f1p0/3657      | NA                       | NA                           | NA                           | R01_cb5258_c2/f1p0/3657      |

|                             |                          |                             |                            |                             |
|-----------------------------|--------------------------|-----------------------------|----------------------------|-----------------------------|
| R01_cb12340_c12/flp0/532    | R01_cb12340_c12/flp0/532 | R01_cb12340_c12/flp0/532    | R01_cb12340_c12/flp0/532   | R01_cb12340_c12/flp0/532    |
| R01_cb6951_c7/flp0/2994     | NA                       | R01_cb6951_c7/flp0/2994     | NA                         | R01_cb6951_c7/flp0/2994     |
| R01_cb8564_c12751/flp0/3357 | NA                       | R01_cb8564_c12751/flp0/3357 | NA                         | NA                          |
| R01_cb1860_c11/flp1/2436    | NA                       | NA                          | NA                         | R01_cb1860_c11/flp1/2436    |
| R01_cb9964_c7/flp0/1113     | NA                       | NA                          | NA                         | R01_cb9964_c7/flp0/1113     |
| R01_cb6253_c2/flp0/1391     | NA                       | R01_cb6253_c2/flp0/1391     | R01_cb6253_c2/flp0/1391    | R01_cb6253_c2/flp0/1391     |
| R01_cb8564_c81851/f2p0/3845 | NA                       | NA                          | NA                         | R01_cb8564_c81851/f2p0/3845 |
| R01_cb8564_c4117/f2p0/2818  | NA                       | R01_cb8564_c4117/f2p0/2818  | R01_cb8564_c4117/f2p0/2818 | R01_cb8564_c4117/f2p0/2818  |
| R01_cb8564_c84398/flp0/2239 | NA                       | R01_cb8564_c84398/flp0/2239 | NA                         | R01_cb8564_c84398/flp0/2239 |
| R01_cb18456_c6465/flp1/661  | NA                       | R01_cb18456_c6465/flp1/661  | NA                         | NA                          |
| R01_cb9455_c0/flp0/2078     | NA                       | R01_cb9455_c0/flp0/2078     | NA                         | R01_cb9455_c0/flp0/2078     |
| R01_cb14684_c0/f4p0/664     | NA                       | R01_cb14684_c0/f4p0/664     | NA                         | NA                          |
| R01_cb15045_c8/flp0/485     | R01_cb15045_c8/flp0/485  | R01_cb15045_c8/flp0/485     | R01_cb15045_c8/flp0/485    | R01_cb15045_c8/flp0/485     |
| R01_cb12399_c4/flp0/581     | NA                       | R01_cb12399_c4/flp0/581     | R01_cb12399_c4/flp0/581    | NA                          |
| R01_cb11249_c2/flp0/2360    | R01_cb11249_c2/flp0/2360 | R01_cb11249_c2/flp0/2360    | NA                         | NA                          |
| R01_cb507_c0/flp0/4657      | NA                       | NA                          | NA                         | R01_cb507_c0/flp0/4657      |
| R01_cb10527_c1/flp0/2657    | NA                       | R01_cb10527_c1/flp0/2657    | R01_cb10527_c1/flp0/2657   | NA                          |
| R01_cb8564_c109847/f2p0/375 | NA                       | R01_cb8564_c109847/f2p0/375 | NA                         | R01_cb8564_c109847/f2p0/375 |
| 7                           |                          | 7                           |                            | 7                           |
| R01_cb18409_c96/f2p0/327    | R01_cb18409_c96/f2p0/327 | R01_cb18409_c96/f2p0/327    | R01_cb18409_c96/f2p0/327   | R01_cb18409_c96/f2p0/327    |
| R01_cb4708_c2/flp0/3281     | NA                       | R01_cb4708_c2/flp0/3281     | NA                         | NA                          |
| R01_cb7563_c32/flp0/597     | NA                       | R01_cb7563_c32/flp0/597     | NA                         | NA                          |
| R01_cb17150_c1/flp0/1055    | NA                       | R01_cb17150_c1/flp0/1055    | R01_cb17150_c1/flp0/1055   | R01_cb17150_c1/flp0/1055    |
| R01_cb11019_c0/flp1/1574    | NA                       | NA                          | NA                         | R01_cb11019_c0/flp1/1574    |
| R01_cb9108_c1/flp0/2099     | NA                       | NA                          | NA                         | R01_cb9108_c1/flp0/2099     |
| R01_cb7999_c9/flp0/874      | NA                       | NA                          | NA                         | R01_cb7999_c9/flp0/874      |

|                             |                          |                             |                          |                             |
|-----------------------------|--------------------------|-----------------------------|--------------------------|-----------------------------|
| R01_cb2718_c8/f1p1/3776     | NA                       | R01_cb2718_c8/f1p1/3776     | NA                       | NA                          |
| R01_cb18456_c2518/f1p0/1789 | NA                       | NA                          | NA                       | R01_cb18456_c2518/f1p0/1789 |
| R01_cb7584_c10/f1p0/2518    | NA                       | R01_cb7584_c10/f1p0/2518    | NA                       | NA                          |
| R01_cb4784_c7/f1p0/2151     | NA                       | NA                          | NA                       | R01_cb4784_c7/f1p0/2151     |
| R01_cb11200_c0/f2p0/339     | R01_cb11200_c0/f2p0/339  | R01_cb11200_c0/f2p0/339     | NA                       | R01_cb11200_c0/f2p0/339     |
| R01_cb7997_c3/f1p0/2486     | NA                       | R01_cb7997_c3/f1p0/2486     | NA                       | NA                          |
| R01_cb12696_c14/f1p1/659    | NA                       | R01_cb12696_c14/f1p1/659    | NA                       | NA                          |
| R01_cb8564_c2906/f1p0/1988  | NA                       | R01_cb8564_c2906/f1p0/1988  | NA                       | R01_cb8564_c2906/f1p0/1988  |
| R01_cb10830_c3/f1p0/806     | NA                       | R01_cb10830_c3/f1p0/806     | NA                       | R01_cb10830_c3/f1p0/806     |
| R01_cb13597_c19/f2p1/1046   | NA                       | R01_cb13597_c19/f2p1/1046   | NA                       | NA                          |
| R01_cb4490_c8/f1p0/2882     | NA                       | R01_cb4490_c8/f1p0/2882     | NA                       | NA                          |
| R01_cb14660_c4/f1p1/1621    | NA                       | R01_cb14660_c4/f1p1/1621    | NA                       | R01_cb14660_c4/f1p1/1621    |
| R01_cb2314_c6/f1p0/1479     | R01_cb2314_c6/f1p0/1479  | R01_cb2314_c6/f1p0/1479     | NA                       | NA                          |
| R01_cb15811_c40/f1p0/607    | R01_cb15811_c40/f1p0/607 | R01_cb15811_c40/f1p0/607    | R01_cb15811_c40/f1p0/607 | R01_cb15811_c40/f1p0/607    |
| R01_cb16205_c1/f1p0/1797    | NA                       | NA                          | NA                       | R01_cb16205_c1/f1p0/1797    |
| R01_cb11430_c1/f1p0/1927    | R01_cb11430_c1/f1p0/1927 | R01_cb11430_c1/f1p0/1927    | NA                       | R01_cb11430_c1/f1p0/1927    |
| R01_cb4836_c1/f3p1/2016     | NA                       | NA                          | NA                       | R01_cb4836_c1/f3p1/2016     |
| R01_cb11565_c0/f1p0/1531    | NA                       | R01_cb11565_c0/f1p0/1531    | NA                       | R01_cb11565_c0/f1p0/1531    |
| R01_cb11971_c3/f1p0/690     | NA                       | NA                          | NA                       | R01_cb11971_c3/f1p0/690     |
| R01_cb1666_c2/f2p0/2331     | NA                       | NA                          | NA                       | R01_cb1666_c2/f2p0/2331     |
| R01_cb1016_c9/f1p0/866      | R01_cb1016_c9/f1p0/866   | R01_cb1016_c9/f1p0/866      | NA                       | R01_cb1016_c9/f1p0/866      |
| R01_cb8564_c127137/f1p1/265 | NA                       | R01_cb8564_c127137/f1p1/265 | NA                       | NA                          |
| 5                           |                          | 5                           |                          |                             |
| R01_cb16133_c2/f1p0/698     | NA                       | NA                          | NA                       | R01_cb16133_c2/f1p0/698     |
| R01_cb7795_c7/f5p1/2561     | NA                       | NA                          | NA                       | R01_cb7795_c7/f5p1/2561     |
| R01_cb9286_c2/f1p0/2429     | NA                       | R01_cb9286_c2/f1p0/2429     | NA                       | NA                          |

|                              |                             |                              |                              |                              |
|------------------------------|-----------------------------|------------------------------|------------------------------|------------------------------|
| R01_cb8564_c74842/f1p0/3214  | R01_cb8564_c74842/f1p0/3214 | R01_cb8564_c74842/f1p0/3214  | R01_cb8564_c74842/f1p0/3214  | R01_cb8564_c74842/f1p0/3214  |
| R01_cb8564_c855/f2p0/2300    | NA                          | R01_cb8564_c855/f2p0/2300    | NA                           | NA                           |
| R01_cb12577_c25/f1p0/1056    | NA                          | NA                           | NA                           | R01_cb12577_c25/f1p0/1056    |
| R01_cb8564_c127233/f1p0/2096 | NA                          | R01_cb8564_c127233/f1p0/2096 | R01_cb8564_c127233/f1p0/2096 | R01_cb8564_c127233/f1p0/2096 |
| R01_cb18456_c4720/f1p0/340   | R01_cb18456_c4720/f1p0/340  | R01_cb18456_c4720/f1p0/340   | R01_cb18456_c4720/f1p0/340   | R01_cb18456_c4720/f1p0/340   |
| R01_cb10029_c683/f1p0/1180   | NA                          | R01_cb10029_c683/f1p0/1180   | NA                           | NA                           |
| R01_cb868_c44/f1p0/2852      | NA                          | R01_cb868_c44/f1p0/2852      | NA                           | NA                           |
| R01_cb2226_c7/f1p0/3551      | NA                          | NA                           | NA                           | R01_cb2226_c7/f1p0/3551      |
| R01_cb3988_c3/f1p0/3690      | NA                          | R01_cb3988_c3/f1p0/3690      | NA                           | NA                           |
| R01_cb10015_c224/f1p0/579    | NA                          | R01_cb10015_c224/f1p0/579    | R01_cb10015_c224/f1p0/579    | NA                           |
| R01_cb17127_c0/f1p1/1059     | NA                          | R01_cb17127_c0/f1p1/1059     | NA                           | R01_cb17127_c0/f1p1/1059     |
| R01_cb8564_c44734/f1p1/3476  | NA                          | R01_cb8564_c44734/f1p1/3476  | NA                           | NA                           |
| R01_cb6760_c2/f1p0/1778      | NA                          | NA                           | NA                           | R01_cb6760_c2/f1p0/1778      |
| R01_cb8564_c69562/f1p0/1967  | NA                          | R01_cb8564_c69562/f1p0/1967  | NA                           | NA                           |
| R01_cb14125_c165/f1p0/795    | NA                          | R01_cb14125_c165/f1p0/795    | R01_cb14125_c165/f1p0/795    | NA                           |
| R01_cb8564_c71877/f1p0/2253  | NA                          | R01_cb8564_c71877/f1p0/2253  | NA                           | NA                           |
| R01_cb8564_c9531/f3p0/2496   | R01_cb8564_c9531/f3p0/2496  | R01_cb8564_c9531/f3p0/2496   | R01_cb8564_c9531/f3p0/2496   | R01_cb8564_c9531/f3p0/2496   |
| R01_cb15572_c6/f3p0/1241     | NA                          | R01_cb15572_c6/f3p0/1241     | NA                           | NA                           |
| R01_cb8564_c16545/f1p0/3368  | R01_cb8564_c16545/f1p0/3368 | R01_cb8564_c16545/f1p0/3368  | NA                           | NA                           |
| R01_cb13513_c6/f6p1/692      | NA                          | R01_cb13513_c6/f6p1/692      | NA                           | NA                           |
| R01_cb8564_c977/f4p0/3093    | NA                          | R01_cb8564_c977/f4p0/3093    | NA                           | R01_cb8564_c977/f4p0/3093    |
| R01_cb8564_c80852/f1p0/2182  | R01_cb8564_c80852/f1p0/2182 | R01_cb8564_c80852/f1p0/2182  | NA                           | R01_cb8564_c80852/f1p0/2182  |

|                              |                             |                              |                             |                             |
|------------------------------|-----------------------------|------------------------------|-----------------------------|-----------------------------|
| R01_cb15621_c0/f3p0/597      | R01_cb15621_c0/f3p0/597     | R01_cb15621_c0/f3p0/597      | R01_cb15621_c0/f3p0/597     | NA                          |
| R01_cb13532_c0/f24p4/1115    | R01_cb13532_c0/f24p4/1115   | NA                           | R01_cb13532_c0/f24p4/1115   | R01_cb13532_c0/f24p4/1115   |
| R01_cb5960_c3/f1p0/2695      | NA                          | R01_cb5960_c3/f1p0/2695      | NA                          | NA                          |
| R01_cb18103_c7/f1p0/926      | NA                          | R01_cb18103_c7/f1p0/926      | R01_cb18103_c7/f1p0/926     | NA                          |
| R01_cb18456_c7627/f1p0/1639  | NA                          | R01_cb18456_c7627/f1p0/1639  | R01_cb18456_c7627/f1p0/1639 | R01_cb18456_c7627/f1p0/1639 |
| R01_cb6923_c9/f3p0/2350      | NA                          | NA                           | NA                          | R01_cb6923_c9/f3p0/2350     |
| R01_cb402_c26/f1p0/3950      | NA                          | R01_cb402_c26/f1p0/3950      | NA                          | R01_cb402_c26/f1p0/3950     |
| R01_cb2311_c12/f1p0/519      | NA                          | NA                           | NA                          | R01_cb2311_c12/f1p0/519     |
| R01_cb2594_c0/f1p0/3843      | R01_cb2594_c0/f1p0/3843     | R01_cb2594_c0/f1p0/3843      | R01_cb2594_c0/f1p0/3843     | R01_cb2594_c0/f1p0/3843     |
| R01_cb8564_c51926/f1p1/3365  | NA                          | R01_cb8564_c51926/f1p1/3365  | NA                          | NA                          |
| R01_cb218_c21/f1p0/4777      | NA                          | NA                           | NA                          | R01_cb218_c21/f1p0/4777     |
| R01_cb11128_c2/f1p0/2839     | NA                          | NA                           | NA                          | R01_cb11128_c2/f1p0/2839    |
| R01_cb647_c9/f1p0/2063       | NA                          | R01_cb647_c9/f1p0/2063       | NA                          | R01_cb647_c9/f1p0/2063      |
| R01_cb2048_c16/f1p0/1038     | R01_cb2048_c16/f1p0/1038    | R01_cb2048_c16/f1p0/1038     | NA                          | NA                          |
| R01_cb3359_c3/f3p1/2296      | NA                          | R01_cb3359_c3/f3p1/2296      | NA                          | NA                          |
| R01_cb7964_c0/f3p1/2292      | NA                          | NA                           | NA                          | R01_cb7964_c0/f3p1/2292     |
| R01_cb11344_c1/f1p0/4741     | NA                          | R01_cb11344_c1/f1p0/4741     | NA                          | NA                          |
| R01_cb8564_c14406/f1p0/3781  | R01_cb8564_c14406/f1p0/3781 | R01_cb8564_c14406/f1p0/3781  | R01_cb8564_c14406/f1p0/3781 | R01_cb8564_c14406/f1p0/3781 |
| R01_cb8564_c70120/f1p0/3094  | NA                          | R01_cb8564_c70120/f1p0/3094  | NA                          | NA                          |
| R01_cb12112_c0/f8p0/555      | NA                          | R01_cb12112_c0/f8p0/555      | NA                          | NA                          |
| R01_cb8564_c128029/f1p0/2697 | NA                          | R01_cb8564_c128029/f1p0/2697 | NA                          | NA                          |
| R01_cb8441_c10/f1p0/1310     | NA                          | NA                           | NA                          | R01_cb8441_c10/f1p0/1310    |
| R01_cb14657_c1/f1p0/1104     | R01_cb14657_c1/f1p0/1104    | R01_cb14657_c1/f1p0/1104     | R01_cb14657_c1/f1p0/1104    | R01_cb14657_c1/f1p0/1104    |
| R01_cb9775_c0/f1p0/1981      | NA                          | NA                           | NA                          | R01_cb9775_c0/f1p0/1981     |

|                              |                            |                             |                             |                              |
|------------------------------|----------------------------|-----------------------------|-----------------------------|------------------------------|
| R01_cb6877_c1/flp0/2406      | NA                         | R01_cb6877_c1/flp0/2406     | NA                          | NA                           |
| R01_cb5896_c50/flp0/2391     | NA                         | R01_cb5896_c50/flp0/2391    | NA                          | R01_cb5896_c50/flp0/2391     |
| R01_cb1961_c2/flp0/4122      | NA                         | R01_cb1961_c2/flp0/4122     | NA                          | NA                           |
| R01_cb6802_c2/f3p0/2295      | NA                         | R01_cb6802_c2/f3p0/2295     | NA                          | NA                           |
| R01_cb4131_c10/flp0/2731     | R01_cb4131_c10/flp0/2731   | R01_cb4131_c10/flp0/2731    | NA                          | NA                           |
| R01_cb6758_c3/flp0/2268      | NA                         | R01_cb6758_c3/flp0/2268     | NA                          | R01_cb6758_c3/flp0/2268      |
| R01_cb18233_c0/flp0/563      | R01_cb18233_c0/flp0/563    | R01_cb18233_c0/flp0/563     | NA                          | R01_cb18233_c0/flp0/563      |
| R01_cb16431_c0/f2p0/644      | NA                         | R01_cb16431_c0/f2p0/644     | NA                          | NA                           |
| R01_cb12064_c5/flp0/1603     | R01_cb12064_c5/flp0/1603   | R01_cb12064_c5/flp0/1603    | NA                          | R01_cb12064_c5/flp0/1603     |
| R01_cb16136_c3/flp0/1189     | NA                         | NA                          | NA                          | R01_cb16136_c3/flp0/1189     |
| R01_cb8564_c85667/flp0/2158  | NA                         | R01_cb8564_c85667/flp0/2158 | R01_cb8564_c85667/flp0/2158 | NA                           |
| R01_cb955_c26/flp0/2746      | NA                         | R01_cb955_c26/flp0/2746     | NA                          | R01_cb955_c26/flp0/2746      |
| R01_cb2536_c24/flp0/921      | NA                         | R01_cb2536_c24/flp0/921     | NA                          | NA                           |
| R01_cb11128_c3/f2p0/1635     | NA                         | NA                          | NA                          | R01_cb11128_c3/f2p0/1635     |
| R01_cb9287_c0/flp0/2081      | NA                         | R01_cb9287_c0/flp0/2081     | NA                          | NA                           |
| R01_cb8564_c124660/flp0/2536 | NA                         | NA                          | NA                          | R01_cb8564_c124660/flp0/2536 |
| R01_cb8564_c1576/flp0/2379   | R01_cb8564_c1576/flp0/2379 | R01_cb8564_c1576/flp0/2379  | R01_cb8564_c1576/flp0/2379  | R01_cb8564_c1576/flp0/2379   |
| R01_cb6606_c9/flp0/2424      | NA                         | R01_cb6606_c9/flp0/2424     | R01_cb6606_c9/flp0/2424     | R01_cb6606_c9/flp0/2424      |
| R01_cb8564_c85054/flp0/2329  | NA                         | R01_cb8564_c85054/flp0/2329 | R01_cb8564_c85054/flp0/2329 | R01_cb8564_c85054/flp0/2329  |
| R01_cb14125_c130/flp0/803    | NA                         | R01_cb14125_c130/flp0/803   | R01_cb14125_c130/flp0/803   | NA                           |
| R01_cb18524_c0/f2p0/1202     | NA                         | NA                          | NA                          | R01_cb18524_c0/f2p0/1202     |
| R01_cb4134_c6/f3p0/2551      | NA                         | NA                          | NA                          | R01_cb4134_c6/f3p0/2551      |
| R01_cb8564_c4952/flp0/2167   | R01_cb8564_c4952/flp0/2167 | R01_cb8564_c4952/flp0/2167  | R01_cb8564_c4952/flp0/2167  | R01_cb8564_c4952/flp0/2167   |
| R01_cb10587_c1/flp0/698      | R01_cb10587_c1/flp0/698    | R01_cb10587_c1/flp0/698     | R01_cb10587_c1/flp0/698     | R01_cb10587_c1/flp0/698      |
| R01_cb8564_c90040/flp1/2670  | NA                         | R01_cb8564_c90040/flp1/2670 | NA                          | NA                           |

|                             |                             |                             |                          |                             |
|-----------------------------|-----------------------------|-----------------------------|--------------------------|-----------------------------|
| R01_cb3793_c0/f2p2/3531     | NA                          | NA                          | NA                       | R01_cb3793_c0/f2p2/3531     |
| R01_cb18456_c7501/flp0/545  | NA                          | NA                          | NA                       | R01_cb18456_c7501/flp0/545  |
| R01_cb8564_c82157/flp0/2510 | R01_cb8564_c82157/flp0/2510 | R01_cb8564_c82157/flp0/2510 | NA                       | R01_cb8564_c82157/flp0/2510 |
| R01_cb5725_c15/flp0/3169    | NA                          | NA                          | NA                       | R01_cb5725_c15/flp0/3169    |
| R01_cb10827_c2/flp0/842     | R01_cb10827_c2/flp0/842     | R01_cb10827_c2/flp0/842     | R01_cb10827_c2/flp0/842  | R01_cb10827_c2/flp0/842     |
| R01_cb18456_c6438/flp0/564  | NA                          | R01_cb18456_c6438/flp0/564  | NA                       | NA                          |
| R01_cb2378_c30/flp0/3817    | NA                          | NA                          | NA                       | R01_cb2378_c30/flp0/3817    |
| R01_cb5830_c1/flp1/3019     | NA                          | NA                          | NA                       | R01_cb5830_c1/flp1/3019     |
| R01_cb18614_c0/flp0/5053    | NA                          | NA                          | NA                       | R01_cb18614_c0/flp0/5053    |
| R01_cb13895_c1/f2p0/557     | NA                          | NA                          | NA                       | R01_cb13895_c1/f2p0/557     |
| R01_cb7171_c17/flp0/2352    | NA                          | NA                          | NA                       | R01_cb7171_c17/flp0/2352    |
| R01_cb6258_c4/f2p1/2492     | NA                          | NA                          | NA                       | R01_cb6258_c4/f2p1/2492     |
| R01_cb12203_c0/flp0/1598    | R01_cb12203_c0/flp0/1598    | R01_cb12203_c0/flp0/1598    | NA                       | R01_cb12203_c0/flp0/1598    |
| R01_cb17302_c3/flp0/666     | R01_cb17302_c3/flp0/666     | R01_cb17302_c3/flp0/666     | NA                       | R01_cb17302_c3/flp0/666     |
| R01_cb13384_c5/f5p0/1010    | NA                          | NA                          | NA                       | R01_cb13384_c5/f5p0/1010    |
| R01_cb10254_c3/flp0/544     | R01_cb10254_c3/flp0/544     | R01_cb10254_c3/flp0/544     | R01_cb10254_c3/flp0/544  | R01_cb10254_c3/flp0/544     |
| R01_cb11614_c0/flp0/1013    | R01_cb11614_c0/flp0/1013    | R01_cb11614_c0/flp0/1013    | NA                       | R01_cb11614_c0/flp0/1013    |
| R01_cb8131_c2/flp0/1066     | NA                          | NA                          | NA                       | R01_cb8131_c2/flp0/1066     |
| R01_cb8564_c3736/flp1/2386  | NA                          | NA                          | NA                       | R01_cb8564_c3736/flp1/2386  |
| R01_cb7765_c23/flp0/2481    | NA                          | R01_cb7765_c23/flp0/2481    | NA                       | NA                          |
| R01_cb2025_c4/flp0/3760     | NA                          | R01_cb2025_c4/flp0/3760     | NA                       | NA                          |
| R01_cb3215_c2/f4p0/2455     | NA                          | R01_cb3215_c2/f4p0/2455     | NA                       | R01_cb3215_c2/f4p0/2455     |
| R01_cb6615_c14/flp0/2490    | NA                          | R01_cb6615_c14/flp0/2490    | R01_cb6615_c14/flp0/2490 | R01_cb6615_c14/flp0/2490    |
| R01_cb13972_c6/flp5/775     | NA                          | R01_cb13972_c6/flp5/775     | NA                       | NA                          |
| R01_cb8564_c120255/flp0/348 | NA                          | R01_cb8564_c120255/flp0/348 | NA                       | NA                          |



|                              |                              |                              |                              |                              |
|------------------------------|------------------------------|------------------------------|------------------------------|------------------------------|
| 5                            |                              | 5                            |                              |                              |
| R01_cb13261_c0/f1p0/838      | NA                           | NA                           | NA                           | R01_cb13261_c0/f1p0/838      |
| R01_cb6608_c19/f1p0/2592     | NA                           | NA                           | NA                           | R01_cb6608_c19/f1p0/2592     |
| R01_cb18240_c0/f2p0/629      | NA                           | R01_cb18240_c0/f2p0/629      | R01_cb18240_c0/f2p0/629      | R01_cb18240_c0/f2p0/629      |
| R01_cb8564_c9691/f2p0/3771   | NA                           | R01_cb8564_c9691/f2p0/3771   | NA                           | NA                           |
| R01_cb17763_c1/f1p0/1123     | NA                           | NA                           | NA                           | R01_cb17763_c1/f1p0/1123     |
| R01_cb9798_c8/f1p0/2060      | NA                           | R01_cb9798_c8/f1p0/2060      | NA                           | NA                           |
| R01_cb5837_c11/f1p0/1991     | R01_cb5837_c11/f1p0/1991     | R01_cb5837_c11/f1p0/1991     | R01_cb5837_c11/f1p0/1991     | NA                           |
| R01_cb7642_c211/f1p0/1727    | NA                           | R01_cb7642_c211/f1p0/1727    | NA                           | NA                           |
| R01_cb8564_c120962/f1p0/2518 | NA                           | NA                           | NA                           | R01_cb8564_c120962/f1p0/2518 |
| 8                            |                              | 8                            |                              | 8                            |
| R01_cb3215_c16/f1p0/3484     | NA                           | R01_cb3215_c16/f1p0/3484     | R01_cb3215_c16/f1p0/3484     | R01_cb3215_c16/f1p0/3484     |
| R01_cb18692_c1/f1p0/1763     | NA                           | R01_cb18692_c1/f1p0/1763     | R01_cb18692_c1/f1p0/1763     | R01_cb18692_c1/f1p0/1763     |
| R01_cb18456_c7189/f1p0/531   | R01_cb18456_c7189/f1p0/531   | R01_cb18456_c7189/f1p0/531   | R01_cb18456_c7189/f1p0/531   | R01_cb18456_c7189/f1p0/531   |
| R01_cb7128_c8/f1p0/1081      | NA                           | R01_cb7128_c8/f1p0/1081      | NA                           | NA                           |
| R01_cb10259_c3/f2p0/340      | R01_cb10259_c3/f2p0/340      | R01_cb10259_c3/f2p0/340      | R01_cb10259_c3/f2p0/340      | R01_cb10259_c3/f2p0/340      |
| R01_cb18131_c0/f1p0/435      | R01_cb18131_c0/f1p0/435      | R01_cb18131_c0/f1p0/435      | R01_cb18131_c0/f1p0/435      | R01_cb18131_c0/f1p0/435      |
| R01_cb18066_c2/f1p0/792      | NA                           | R01_cb18066_c2/f1p0/792      | NA                           | R01_cb18066_c2/f1p0/792      |
| R01_cb8564_c80835/f1p0/2866  | NA                           | NA                           | NA                           | R01_cb8564_c80835/f1p0/2866  |
| R01_cb8564_c4686/f1p0/3506   | NA                           | R01_cb8564_c4686/f1p0/3506   | NA                           | NA                           |
| R01_cb8564_c125054/f1p0/1888 | R01_cb8564_c125054/f1p0/1888 | R01_cb8564_c125054/f1p0/1888 | R01_cb8564_c125054/f1p0/1888 | R01_cb8564_c125054/f1p0/1888 |
| 8                            | 88                           | 8                            | 8                            | 8                            |
| R01_cb4258_c2/f1p0/3140      | NA                           | R01_cb4258_c2/f1p0/3140      | NA                           | NA                           |
| R01_cb5021_c1/f2p0/3182      | NA                           | R01_cb5021_c1/f2p0/3182      | NA                           | R01_cb5021_c1/f2p0/3182      |
| R01_cb11090_c4/f1p0/1434     | NA                           | R01_cb11090_c4/f1p0/1434     | NA                           | NA                           |
| R01_cb12449_c2/f1p0/1676     | NA                           | R01_cb12449_c2/f1p0/1676     | NA                           | NA                           |

|                                  |                                   |                                  |                                  |                                  |
|----------------------------------|-----------------------------------|----------------------------------|----------------------------------|----------------------------------|
| R01_cb3532_c5/f1p0/1699          | NA                                | R01_cb3532_c5/f1p0/1699          | NA                               | NA                               |
| R01_cb8564_c109562/f1p0/190<br>1 | NA                                | NA                               | R01_cb8564_c109562/f1p0/190<br>1 | R01_cb8564_c109562/f1p0/190<br>1 |
| R01_cb11147_c0/f2p0/742          | NA                                | NA                               | NA                               | R01_cb11147_c0/f2p0/742          |
| R01_cb8681_c1/f1p0/2273          | R01_cb8681_c1/f1p0/2273           | R01_cb8681_c1/f1p0/2273          | R01_cb8681_c1/f1p0/2273          | R01_cb8681_c1/f1p0/2273          |
| R01_cb11900_c1/f9p0/640          | NA                                | R01_cb11900_c1/f9p0/640          | NA                               | R01_cb11900_c1/f9p0/640          |
| R01_cb6666_c12/f1p0/884          | NA                                | NA                               | NA                               | R01_cb6666_c12/f1p0/884          |
| R01_cb6625_c13/f1p0/1286         | NA                                | R01_cb6625_c13/f1p0/1286         | NA                               | NA                               |
| R01_cb15913_c0/f1p0/1519         | NA                                | R01_cb15913_c0/f1p0/1519         | R01_cb15913_c0/f1p0/1519         | R01_cb15913_c0/f1p0/1519         |
| R01_cb4916_c0/f6p1/2108          | NA                                | NA                               | NA                               | R01_cb4916_c0/f6p1/2108          |
| R01_cb11278_c0/f6p2/1831         | NA                                | NA                               | NA                               | R01_cb11278_c0/f6p2/1831         |
| R01_cb10015_c408/f1p0/626        | NA                                | R01_cb10015_c408/f1p0/626        | NA                               | NA                               |
| R01_cb17084_c1/f1p0/615          | R01_cb17084_c1/f1p0/615           | R01_cb17084_c1/f1p0/615          | NA                               | NA                               |
| R01_cb9513_c18/f1p0/3291         | NA                                | R01_cb9513_c18/f1p0/3291         | NA                               | NA                               |
| R01_cb8564_c8714/f12p0/2566      | NA                                | NA                               | NA                               | R01_cb8564_c8714/f12p0/2566      |
| R01_cb8609_c26/f1p0/2139         | NA                                | R01_cb8609_c26/f1p0/2139         | NA                               | NA                               |
| R01_cb8564_c2907/f1p0/4168       | NA                                | R01_cb8564_c2907/f1p0/4168       | NA                               | NA                               |
| R01_cb1398_c1/f1p0/3187          | NA                                | R01_cb1398_c1/f1p0/3187          | R01_cb1398_c1/f1p0/3187          | NA                               |
| R01_cb16146_c3/f1p0/576          | NA                                | R01_cb16146_c3/f1p0/576          | NA                               | NA                               |
| R01_cb8564_c114390/f1p0/224<br>7 | R01_cb8564_c114390/f1p0/224<br>47 | R01_cb8564_c114390/f1p0/224<br>7 | NA                               | NA                               |
| R01_cb12094_c38/f1p0/300         | R01_cb12094_c38/f1p0/300          | R01_cb12094_c38/f1p0/300         | R01_cb12094_c38/f1p0/300         | R01_cb12094_c38/f1p0/300         |
| R01_cb15053_c12/f4p0/633         | NA                                | R01_cb15053_c12/f4p0/633         | R01_cb15053_c12/f4p0/633         | NA                               |
| R01_cb12057_c47/f1p1/869         | NA                                | R01_cb12057_c47/f1p1/869         | NA                               | NA                               |
| R01_cb3388_c14/f1p0/2251         | NA                                | R01_cb3388_c14/f1p0/2251         | NA                               | NA                               |
| R01_cb18015_c0/f1p0/969          | NA                                | NA                               | NA                               | R01_cb18015_c0/f1p0/969          |

|                             |                             |                             |                             |                             |
|-----------------------------|-----------------------------|-----------------------------|-----------------------------|-----------------------------|
| R01_cb18553_c1/flp0/1330    | NA                          | NA                          | NA                          | R01_cb18553_c1/flp0/1330    |
| R01_cb4345_c18/flp0/1393    | NA                          | NA                          | NA                          | R01_cb4345_c18/flp0/1393    |
| R01_cb9277_c0/f2p0/2114     | R01_cb9277_c0/f2p0/2114     | R01_cb9277_c0/f2p0/2114     | R01_cb9277_c0/f2p0/2114     | R01_cb9277_c0/f2p0/2114     |
| R01_cb16005_c0/f2p0/668     | NA                          | R01_cb16005_c0/f2p0/668     | NA                          | NA                          |
| R01_cb8441_c6/flp0/2298     | NA                          | NA                          | NA                          | R01_cb8441_c6/flp0/2298     |
| R01_cb8564_c53082/flp0/1966 | R01_cb8564_c53082/flp0/1966 | R01_cb8564_c53082/flp0/1966 | R01_cb8564_c53082/flp0/1966 | R01_cb8564_c53082/flp0/1966 |
| R01_cb454_c41/flp0/5181     | NA                          | NA                          | NA                          | R01_cb454_c41/flp0/5181     |
| R01_cb7441_c11/flp0/574     | NA                          | R01_cb7441_c11/flp0/574     | R01_cb7441_c11/flp0/574     | R01_cb7441_c11/flp0/574     |
| R01_cb8564_c12382/flp0/2497 | R01_cb8564_c12382/flp0/2497 | R01_cb8564_c12382/flp0/2497 | R01_cb8564_c12382/flp0/2497 | R01_cb8564_c12382/flp0/2497 |
| R01_cb17872_c4/flp0/801     | NA                          | NA                          | NA                          | R01_cb17872_c4/flp0/801     |
| R01_cb18028_c2/flp1/1409    | NA                          | R01_cb18028_c2/flp1/1409    | NA                          | NA                          |
| R01_cb8564_c1377/flp0/2527  | NA                          | R01_cb8564_c1377/flp0/2527  | NA                          | NA                          |
| R01_cb8941_c0/flp0/2230     | NA                          | NA                          | NA                          | R01_cb8941_c0/flp0/2230     |
| R01_cb2737_c16/flp0/3175    | NA                          | R01_cb2737_c16/flp0/3175    | NA                          | NA                          |
| R01_cb8173_c7/flp3/1979     | NA                          | R01_cb8173_c7/flp3/1979     | R01_cb8173_c7/flp3/1979     | R01_cb8173_c7/flp3/1979     |
| R01_cb8310_c4/flp0/395      | R01_cb8310_c4/flp0/395      | R01_cb8310_c4/flp0/395      | R01_cb8310_c4/flp0/395      | R01_cb8310_c4/flp0/395      |
| R01_cb8564_c14414/flp0/3224 | NA                          | R01_cb8564_c14414/flp0/3224 | NA                          | R01_cb8564_c14414/flp0/3224 |
| R01_cb2072_c36/flp0/3424    | R01_cb2072_c36/flp0/3424    | R01_cb2072_c36/flp0/3424    | R01_cb2072_c36/flp0/3424    | R01_cb2072_c36/flp0/3424    |
| R01_cb11183_c5/f3p0/1743    | NA                          | NA                          | NA                          | R01_cb11183_c5/f3p0/1743    |
| R01_cb17249_c0/flp0/1449    | NA                          | R01_cb17249_c0/flp0/1449    | NA                          | NA                          |
| R01_cb4248_c2/flp0/3709     | NA                          | R01_cb4248_c2/flp0/3709     | NA                          | NA                          |
| R01_cb11049_c5/flp0/1588    | NA                          | NA                          | NA                          | R01_cb11049_c5/flp0/1588    |
| R01_cb1718_c5/flp1/2111     | NA                          | NA                          | NA                          | R01_cb1718_c5/flp1/2111     |
| R01_cb12213_c4/flp1/818     | NA                          | R01_cb12213_c4/flp1/818     | NA                          | NA                          |

|                             |                            |                             |                            |                             |
|-----------------------------|----------------------------|-----------------------------|----------------------------|-----------------------------|
| R01_cb17165_c0/f2p0/606     | NA                         | R01_cb17165_c0/f2p0/606     | NA                         | NA                          |
| R01_cb6529_c1/f2p0/2615     | NA                         | NA                          | NA                         | R01_cb6529_c1/f2p0/2615     |
| R01_cb2494_c10/f1p0/979     | R01_cb2494_c10/f1p0/979    | R01_cb2494_c10/f1p0/979     | R01_cb2494_c10/f1p0/979    | R01_cb2494_c10/f1p0/979     |
| R01_cb7170_c1/f1p0/3006     | NA                         | NA                          | NA                         | R01_cb7170_c1/f1p0/3006     |
| R01_cb5373_c6/f1p0/2748     | NA                         | NA                          | NA                         | R01_cb5373_c6/f1p0/2748     |
| R01_cb8564_c74106/f1p0/3040 | NA                         | R01_cb8564_c74106/f1p0/3040 | NA                         | R01_cb8564_c74106/f1p0/3040 |
| R01_cb18409_c70/f3p0/423    | R01_cb18409_c70/f3p0/423   | R01_cb18409_c70/f3p0/423    | R01_cb18409_c70/f3p0/423   | R01_cb18409_c70/f3p0/423    |
| R01_cb11514_c0/f1p0/428     | R01_cb11514_c0/f1p0/428    | R01_cb11514_c0/f1p0/428     | NA                         | R01_cb11514_c0/f1p0/428     |
| R01_cb16583_c1/f1p0/824     | NA                         | R01_cb16583_c1/f1p0/824     | R01_cb16583_c1/f1p0/824    | R01_cb16583_c1/f1p0/824     |
| R01_cb8360_c2/f2p0/2406     | R01_cb8360_c2/f2p0/2406    | R01_cb8360_c2/f2p0/2406     | NA                         | NA                          |
| R01_cb6631_c20/f1p1/2421    | NA                         | NA                          | NA                         | R01_cb6631_c20/f1p1/2421    |
| R01_cb9270_c3/f1p0/2645     | NA                         | R01_cb9270_c3/f1p0/2645     | R01_cb9270_c3/f1p0/2645    | NA                          |
| R01_cb18427_c0/f1p0/744     | NA                         | NA                          | NA                         | R01_cb18427_c0/f1p0/744     |
| R01_cb18456_c7242/f1p0/641  | R01_cb18456_c7242/f1p0/641 | R01_cb18456_c7242/f1p0/641  | R01_cb18456_c7242/f1p0/641 | R01_cb18456_c7242/f1p0/641  |
| R01_cb8564_c46257/f1p0/3584 | NA                         | R01_cb8564_c46257/f1p0/3584 | NA                         | NA                          |
| R01_cb12803_c4/f3p0/1233    | NA                         | NA                          | NA                         | R01_cb12803_c4/f3p0/1233    |
| R01_cb14532_c0/f1p0/948     | NA                         | R01_cb14532_c0/f1p0/948     | NA                         | R01_cb14532_c0/f1p0/948     |
| R01_cb8564_c110470/f1p0/272 | NA                         | R01_cb8564_c110470/f1p0/272 | NA                         | NA                          |
| 7                           |                            | 7                           |                            |                             |
| R01_cb8767_c21/f1p0/308     | R01_cb8767_c21/f1p0/308    | R01_cb8767_c21/f1p0/308     | R01_cb8767_c21/f1p0/308    | R01_cb8767_c21/f1p0/308     |
| R01_cb17402_c0/f1p0/452     | R01_cb17402_c0/f1p0/452    | R01_cb17402_c0/f1p0/452     | R01_cb17402_c0/f1p0/452    | R01_cb17402_c0/f1p0/452     |
| R01_cb6914_c25/f1p0/1399    | NA                         | NA                          | NA                         | R01_cb6914_c25/f1p0/1399    |
| R01_cb7230_c13/f1p0/740     | NA                         | R01_cb7230_c13/f1p0/740     | NA                         | R01_cb7230_c13/f1p0/740     |
| R01_cb8564_c52365/f1p0/2644 | NA                         | NA                          | NA                         | R01_cb8564_c52365/f1p0/2644 |
| R01_cb872_c3/f1p0/4371      | NA                         | NA                          | NA                         | R01_cb872_c3/f1p0/4371      |
| R01_cb4978_c2/f1p0/3209     | NA                         | R01_cb4978_c2/f1p0/3209     | NA                         | R01_cb4978_c2/f1p0/3209     |

|                             |                          |                             |                         |                             |
|-----------------------------|--------------------------|-----------------------------|-------------------------|-----------------------------|
| R01_cb7215_c0/flp0/2670     | NA                       | NA                          | NA                      | R01_cb7215_c0/flp0/2670     |
| R01_cb8564_c22602/flp4/3938 | NA                       | R01_cb8564_c22602/flp4/3938 | NA                      | NA                          |
| R01_cb8849_c2/flp0/2466     | NA                       | NA                          | NA                      | R01_cb8849_c2/flp0/2466     |
| R01_cb17326_c1/flp0/752     | NA                       | R01_cb17326_c1/flp0/752     | NA                      | NA                          |
| R01_cb4223_c0/flp0/3399     | NA                       | NA                          | NA                      | R01_cb4223_c0/flp0/3399     |
| R01_cb7544_c2/flp0/2479     | NA                       | R01_cb7544_c2/flp0/2479     | NA                      | NA                          |
| R01_cb15275_c2/flp0/607     | NA                       | R01_cb15275_c2/flp0/607     | R01_cb15275_c2/flp0/607 | R01_cb15275_c2/flp0/607     |
| R01_cb9530_c1/flp0/2055     | NA                       | NA                          | NA                      | R01_cb9530_c1/flp0/2055     |
| R01_cb12336_c13/flp0/757    | NA                       | R01_cb12336_c13/flp0/757    | NA                      | NA                          |
| R01_cb4286_c12/flp0/2641    | NA                       | R01_cb4286_c12/flp0/2641    | NA                      | NA                          |
| R01_cb13033_c8/flp0/927     | NA                       | R01_cb13033_c8/flp0/927     | R01_cb13033_c8/flp0/927 | R01_cb13033_c8/flp0/927     |
| R01_cb14004_c10/flp0/1492   | NA                       | NA                          | NA                      | R01_cb14004_c10/flp0/1492   |
| R01_cb14812_c20/flp1/426    | R01_cb14812_c20/flp1/426 | R01_cb14812_c20/flp1/426    | NA                      | NA                          |
| R01_cb15582_c1/flp0/1582    | NA                       | NA                          | NA                      | R01_cb15582_c1/flp0/1582    |
| R01_cb4653_c0/flp0/3288     | NA                       | NA                          | NA                      | R01_cb4653_c0/flp0/3288     |
| R01_cb14751_c0/flp0/588     | NA                       | R01_cb14751_c0/flp0/588     | NA                      | NA                          |
| R01_cb8564_c11674/flp0/2675 | NA                       | R01_cb8564_c11674/flp0/2675 | NA                      | R01_cb8564_c11674/flp0/2675 |
| R01_cb8564_c90559/flp0/2150 | NA                       | R01_cb8564_c90559/flp0/2150 | NA                      | NA                          |
| R01_cb4960_c0/f2p0/3162     | NA                       | R01_cb4960_c0/f2p0/3162     | R01_cb4960_c0/f2p0/3162 | R01_cb4960_c0/f2p0/3162     |
| R01_cb6660_c1/flp0/2728     | NA                       | R01_cb6660_c1/flp0/2728     | NA                      | NA                          |
| R01_cb5223_c3/flp0/3048     | NA                       | R01_cb5223_c3/flp0/3048     | NA                      | NA                          |
| R01_cb4649_c3/flp0/2161     | NA                       | NA                          | NA                      | R01_cb4649_c3/flp0/2161     |
| R01_cb7111_c4/flp0/2495     | NA                       | R01_cb7111_c4/flp0/2495     | NA                      | NA                          |
| R01_cb15118_c3/f3p0/554     | NA                       | NA                          | NA                      | R01_cb15118_c3/f3p0/554     |
| R01_cb7806_c2/flp0/2497     | NA                       | R01_cb7806_c2/flp0/2497     | R01_cb7806_c2/flp0/2497 | R01_cb7806_c2/flp0/2497     |
| R01_cb13528_c3/flp0/1234    | NA                       | NA                          | NA                      | R01_cb13528_c3/flp0/1234    |

|                             |                         |                             |                          |                             |
|-----------------------------|-------------------------|-----------------------------|--------------------------|-----------------------------|
| R01_cb11646_c1/flp0/1708    | NA                      | NA                          | NA                       | R01_cb11646_c1/flp0/1708    |
| R01_cb260_c17/flp0/2753     | NA                      | R01_cb260_c17/flp0/2753     | NA                       | R01_cb260_c17/flp0/2753     |
| R01_cb8564_c12028/flp0/3854 | NA                      | R01_cb8564_c12028/flp0/3854 | NA                       | R01_cb8564_c12028/flp0/3854 |
| R01_cb8564_c5187/flp1/3167  | NA                      | R01_cb8564_c5187/flp1/3167  | NA                       | NA                          |
| R01_cb18800_c1/flp1/6954    | NA                      | R01_cb18800_c1/flp1/6954    | NA                       | NA                          |
| R01_cb2686_c2/flp0/4322     | NA                      | R01_cb2686_c2/flp0/4322     | NA                       | NA                          |
| R01_cb14656_c5/flp1/1089    | NA                      | R01_cb14656_c5/flp1/1089    | NA                       | NA                          |
| R01_cb14591_c4/flp0/431     | R01_cb14591_c4/flp0/431 | R01_cb14591_c4/flp0/431     | NA                       | R01_cb14591_c4/flp0/431     |
| R01_cb13965_c1/flp0/946     | NA                      | R01_cb13965_c1/flp0/946     | NA                       | NA                          |
| R01_cb8173_c1/fl2p3/1196    | NA                      | R01_cb8173_c1/fl2p3/1196    | R01_cb8173_c1/fl2p3/1196 | R01_cb8173_c1/fl2p3/1196    |
| R01_cb4583_c10/flp0/3406    | NA                      | R01_cb4583_c10/flp0/3406    | R01_cb4583_c10/flp0/3406 | NA                          |
| R01_cb93_c6/flp0/5054       | NA                      | NA                          | NA                       | R01_cb93_c6/flp0/5054       |
| R01_cb8564_c87303/flp0/2564 | NA                      | R01_cb8564_c87303/flp0/2564 | NA                       | NA                          |
| R01_cb2640_c10/flp0/3278    | NA                      | R01_cb2640_c10/flp0/3278    | NA                       | NA                          |
| R01_cb16981_c2/f4p1/712     | NA                      | NA                          | NA                       | R01_cb16981_c2/f4p1/712     |
| R01_cb5657_c6/flp0/2412     | NA                      | NA                          | NA                       | R01_cb5657_c6/flp0/2412     |
| R01_cb16534_c1/flp0/1414    | NA                      | R01_cb16534_c1/flp0/1414    | NA                       | NA                          |
| R01_cb8564_c17724/flp0/2921 | NA                      | R01_cb8564_c17724/flp0/2921 | NA                       | R01_cb8564_c17724/flp0/2921 |
| R01_cb6752_c0/flp0/2776     | NA                      | R01_cb6752_c0/flp0/2776     | NA                       | R01_cb6752_c0/flp0/2776     |
| R01_cb6281_c0/flp0/2892     | NA                      | NA                          | NA                       | R01_cb6281_c0/flp0/2892     |
| R01_cb1228_c33/flp0/2917    | NA                      | NA                          | NA                       | R01_cb1228_c33/flp0/2917    |
| R01_cb4491_c6/flp0/406      | R01_cb4491_c6/flp0/406  | R01_cb4491_c6/flp0/406      | R01_cb4491_c6/flp0/406   | R01_cb4491_c6/flp0/406      |
| R01_cb2870_c9/flp0/2871     | NA                      | NA                          | NA                       | R01_cb2870_c9/flp0/2871     |
| R01_cb18655_c2/flp0/1336    | NA                      | NA                          | NA                       | R01_cb18655_c2/flp0/1336    |
| R01_cb11841_c1/flp0/3551    | NA                      | R01_cb11841_c1/flp0/3551    | NA                       | R01_cb11841_c1/flp0/3551    |
| R01_cb12024_c16/flp0/997    | NA                      | NA                          | NA                       | R01_cb12024_c16/flp0/997    |

|                              |                             |                              |                             |                              |
|------------------------------|-----------------------------|------------------------------|-----------------------------|------------------------------|
| R01_cb15438_c4/f1p0/698      | NA                          | R01_cb15438_c4/f1p0/698      | NA                          | NA                           |
| R01_cb8564_c91941/f1p0/2521  | NA                          | R01_cb8564_c91941/f1p0/2521  | R01_cb8564_c91941/f1p0/2521 | R01_cb8564_c91941/f1p0/2521  |
| R01_cb10015_c597/f2p0/491    | R01_cb10015_c597/f2p0/491   | R01_cb10015_c597/f2p0/491    | R01_cb10015_c597/f2p0/491   | NA                           |
| R01_cb3739_c2/f1p2/4063      | R01_cb3739_c2/f1p2/4063     | R01_cb3739_c2/f1p2/4063      | R01_cb3739_c2/f1p2/4063     | R01_cb3739_c2/f1p2/4063      |
| R01_cb5831_c2/f1p0/2779      | NA                          | R01_cb5831_c2/f1p0/2779      | R01_cb5831_c2/f1p0/2779     | R01_cb5831_c2/f1p0/2779      |
| R01_cb12114_c7/f1p0/1209     | NA                          | NA                           | NA                          | R01_cb12114_c7/f1p0/1209     |
| R01_cb18256_c1/f1p0/884      | NA                          | R01_cb18256_c1/f1p0/884      | NA                          | R01_cb18256_c1/f1p0/884      |
| R01_cb18456_c6121/f1p0/479   | NA                          | R01_cb18456_c6121/f1p0/479   | R01_cb18456_c6121/f1p0/479  | R01_cb18456_c6121/f1p0/479   |
| R01_cb8564_c21926/f1p0/3009  | NA                          | R01_cb8564_c21926/f1p0/3009  | NA                          | NA                           |
| R01_cb18315_c1/f1p0/1537     | NA                          | R01_cb18315_c1/f1p0/1537     | R01_cb18315_c1/f1p0/1537    | R01_cb18315_c1/f1p0/1537     |
| R01_cb18456_c7512/f1p0/722   | NA                          | R01_cb18456_c7512/f1p0/722   | R01_cb18456_c7512/f1p0/722  | R01_cb18456_c7512/f1p0/722   |
| R01_cb8564_c86114/f2p0/3093  | R01_cb8564_c86114/f2p0/3093 | R01_cb8564_c86114/f2p0/3093  | R01_cb8564_c86114/f2p0/3093 | R01_cb8564_c86114/f2p0/3093  |
| R01_cb10039_c2/f1p0/2178     | NA                          | R01_cb10039_c2/f1p0/2178     | NA                          | NA                           |
| R01_cb13914_c8/f1p0/1455     | R01_cb13914_c8/f1p0/1455    | R01_cb13914_c8/f1p0/1455     | NA                          | R01_cb13914_c8/f1p0/1455     |
| R01_cb8564_c118261/f1p0/2871 | NA                          | R01_cb8564_c118261/f1p0/2871 | NA                          | R01_cb8564_c118261/f1p0/2871 |
| R01_cb10093_c7/f1p0/1667     | NA                          | R01_cb10093_c7/f1p0/1667     | NA                          | R01_cb10093_c7/f1p0/1667     |
| R01_cb15469_c2/f1p0/1116     | NA                          | R01_cb15469_c2/f1p0/1116     | NA                          | NA                           |
| R01_cb8564_c39104/f1p0/2333  | R01_cb8564_c39104/f1p0/2333 | R01_cb8564_c39104/f1p0/2333  | NA                          | NA                           |
| R01_cb10030_c88/f1p0/817     | NA                          | R01_cb10030_c88/f1p0/817     | NA                          | NA                           |
| R01_cb12319_c3/f1p0/580      | R01_cb12319_c3/f1p0/580     | R01_cb12319_c3/f1p0/580      | R01_cb12319_c3/f1p0/580     | R01_cb12319_c3/f1p0/580      |
| R01_cb7545_c6/f1p0/2482      | NA                          | R01_cb7545_c6/f1p0/2482      | NA                          | NA                           |
| R01_cb5847_c2/f2p0/2171      | NA                          | NA                           | NA                          | R01_cb5847_c2/f2p0/2171      |
| R01_cb4354_c30/f8p3/3233     | NA                          | NA                           | NA                          | R01_cb4354_c30/f8p3/3233     |

|                             |                          |                             |                          |                             |
|-----------------------------|--------------------------|-----------------------------|--------------------------|-----------------------------|
| R01_cb5026_c4/flp0/1579     | NA                       | NA                          | NA                       | R01_cb5026_c4/flp0/1579     |
| R01_cb18456_c4780/flp0/511  | NA                       | R01_cb18456_c4780/flp0/511  | NA                       | R01_cb18456_c4780/flp0/511  |
| R01_cb7945_c0/flp0/2497     | NA                       | R01_cb7945_c0/flp0/2497     | NA                       | R01_cb7945_c0/flp0/2497     |
| R01_cb18100_c1/flp0/1125    | NA                       | R01_cb18100_c1/flp0/1125    | R01_cb18100_c1/flp0/1125 | R01_cb18100_c1/flp0/1125    |
| R01_cb17236_c2/flp0/848     | R01_cb17236_c2/flp0/848  | R01_cb17236_c2/flp0/848     | R01_cb17236_c2/flp0/848  | R01_cb17236_c2/flp0/848     |
| R01_cb18032_c0/flp0/1122    | NA                       | NA                          | NA                       | R01_cb18032_c0/flp0/1122    |
| R01_cb1116_c4/flp0/2849     | NA                       | NA                          | NA                       | R01_cb1116_c4/flp0/2849     |
| R01_cb11099_c2/flp0/1823    | NA                       | NA                          | NA                       | R01_cb11099_c2/flp0/1823    |
| R01_cb14108_c3/flp1/888     | R01_cb14108_c3/flp1/888  | NA                          | NA                       | R01_cb14108_c3/flp1/888     |
| R01_cb1297_c7/f2p0/3854     | NA                       | NA                          | NA                       | R01_cb1297_c7/f2p0/3854     |
| R01_cb17579_c3/flp0/5395    | NA                       | R01_cb17579_c3/flp0/5395    | NA                       | NA                          |
| R01_cb5442_c0/flp0/2982     | NA                       | NA                          | R01_cb5442_c0/flp0/2982  | R01_cb5442_c0/flp0/2982     |
| R01_cb18456_c7344/flp0/756  | NA                       | R01_cb18456_c7344/flp0/756  | NA                       | NA                          |
| R01_cb4949_c2/flp0/3213     | NA                       | R01_cb4949_c2/flp0/3213     | NA                       | NA                          |
| R01_cb18409_c39/flp0/444    | R01_cb18409_c39/flp0/444 | R01_cb18409_c39/flp0/444    | R01_cb18409_c39/flp0/444 | R01_cb18409_c39/flp0/444    |
| R01_cb4916_c8/flp0/2155     | NA                       | NA                          | NA                       | R01_cb4916_c8/flp0/2155     |
| R01_cb16968_c2/flp0/1243    | NA                       | NA                          | NA                       | R01_cb16968_c2/flp0/1243    |
| R01_cb10163_c5/flp0/813     | NA                       | R01_cb10163_c5/flp0/813     | R01_cb10163_c5/flp0/813  | R01_cb10163_c5/flp0/813     |
| R01_cb15922_c0/flp0/1840    | NA                       | R01_cb15922_c0/flp0/1840    | R01_cb15922_c0/flp0/1840 | R01_cb15922_c0/flp0/1840    |
| R01_cb10542_c7/flp0/979     | NA                       | R01_cb10542_c7/flp0/979     | NA                       | R01_cb10542_c7/flp0/979     |
| R01_cb8564_c78723/flp0/2738 | NA                       | NA                          | NA                       | R01_cb8564_c78723/flp0/2738 |
| R01_cb14307_c3/flp0/1672    | NA                       | R01_cb14307_c3/flp0/1672    | NA                       | NA                          |
| R01_cb2378_c29/flp0/3449    | NA                       | NA                          | NA                       | R01_cb2378_c29/flp0/3449    |
| R01_cb10015_c489/flp0/575   | NA                       | R01_cb10015_c489/flp0/575   | NA                       | NA                          |
| R01_cb8564_c25687/flp0/3582 | NA                       | NA                          | NA                       | R01_cb8564_c25687/flp0/3582 |
| R01_cb8564_c117293/flp0/225 | NA                       | R01_cb8564_c117293/flp0/225 | NA                       | R01_cb8564_c117293/flp0/225 |



|                             |                         |                             |                             |                             |
|-----------------------------|-------------------------|-----------------------------|-----------------------------|-----------------------------|
| 4                           |                         | 4                           |                             | 4                           |
| R01_cb4117_c0/f6p2/1639     | NA                      | NA                          | NA                          | R01_cb4117_c0/f6p2/1639     |
| R01_cb8564_c82584/flp0/3616 | NA                      | R01_cb8564_c82584/flp0/3616 | NA                          | R01_cb8564_c82584/flp0/3616 |
| R01_cb4795_c2/flp0/3264     | NA                      | R01_cb4795_c2/flp0/3264     | NA                          | R01_cb4795_c2/flp0/3264     |
| R01_cb5753_c14/flp1/2728    | NA                      | R01_cb5753_c14/flp1/2728    | NA                          | NA                          |
| R01_cb17584_c2/flp0/1461    | NA                      | NA                          | NA                          | R01_cb17584_c2/flp0/1461    |
| R01_cb8564_c128060/flp0/216 | NA                      | R01_cb8564_c128060/flp0/216 | NA                          | R01_cb8564_c128060/flp0/216 |
| 2                           |                         | 2                           |                             | 2                           |
| R01_cb8877_c2/flp0/2017     | NA                      | NA                          | NA                          | R01_cb8877_c2/flp0/2017     |
| R01_cb4514_c2/flp0/3337     | NA                      | NA                          | NA                          | R01_cb4514_c2/flp0/3337     |
| R01_cb8564_c125217/flp0/230 | NA                      | NA                          | R01_cb8564_c125217/flp0/230 | NA                          |
| 7                           |                         | 7                           |                             | 7                           |
| R01_cb4317_c12/flp0/2105    | NA                      | R01_cb4317_c12/flp0/2105    | R01_cb4317_c12/flp0/2105    | R01_cb4317_c12/flp0/2105    |
| R01_cb16645_c49/flp0/1660   | NA                      | R01_cb16645_c49/flp0/1660   | NA                          | NA                          |
| R01_cb11212_c1/f3p0/664     | NA                      | R01_cb11212_c1/f3p0/664     | NA                          | NA                          |
| R01_cb8564_c4496/flp1/2482  | NA                      | R01_cb8564_c4496/flp1/2482  | R01_cb8564_c4496/flp1/2482  | R01_cb8564_c4496/flp1/2482  |
| R01_cb8564_c50086/flp0/3752 | NA                      | R01_cb8564_c50086/flp0/3752 | NA                          | NA                          |
| R01_cb6004_c1/flp1/2953     | NA                      | NA                          | NA                          | R01_cb6004_c1/flp1/2953     |
| R01_cb8564_c53029/flp0/2512 | NA                      | R01_cb8564_c53029/flp0/2512 | NA                          | R01_cb8564_c53029/flp0/2512 |
| R01_cb4453_c2/flp0/2616     | NA                      | NA                          | NA                          | R01_cb4453_c2/flp0/2616     |
| R01_cb7027_c3/flp0/1722     | NA                      | R01_cb7027_c3/flp0/1722     | NA                          | NA                          |
| R01_cb10849_c3/flp0/2946    | NA                      | R01_cb10849_c3/flp0/2946    | NA                          | NA                          |
| R01_cb7401_c9/flp0/2249     | NA                      | R01_cb7401_c9/flp0/2249     | R01_cb7401_c9/flp0/2249     | R01_cb7401_c9/flp0/2249     |
| R01_cb18137_c1/flp0/1363    | NA                      | NA                          | NA                          | R01_cb18137_c1/flp0/1363    |
| R01_cb2581_c1/flp0/3884     | R01_cb2581_c1/flp0/3884 | R01_cb2581_c1/flp0/3884     | R01_cb2581_c1/flp0/3884     | R01_cb2581_c1/flp0/3884     |
| R01_cb6057_c7/flp0/1762     | NA                      | NA                          | NA                          | R01_cb6057_c7/flp0/1762     |

|                              |                            |                              |                              |                              |
|------------------------------|----------------------------|------------------------------|------------------------------|------------------------------|
| R01_cb11929_c0/f2p0/1689     | NA                         | R01_cb11929_c0/f2p0/1689     | R01_cb11929_c0/f2p0/1689     | R01_cb11929_c0/f2p0/1689     |
| R01_cb14704_c26/f1p0/1469    | NA                         | R01_cb14704_c26/f1p0/1469    | NA                           | NA                           |
| R01_cb15012_c1/f1p0/1699     | NA                         | R01_cb15012_c1/f1p0/1699     | NA                           | R01_cb15012_c1/f1p0/1699     |
| R01_cb16718_c0/f4p0/1155     | NA                         | R01_cb16718_c0/f4p0/1155     | NA                           | R01_cb16718_c0/f4p0/1155     |
| R01_cb14711_c1/f2p0/1357     | NA                         | R01_cb14711_c1/f2p0/1357     | NA                           | NA                           |
| R01_cb8564_c3683/f1p0/4183   | R01_cb8564_c3683/f1p0/4183 | R01_cb8564_c3683/f1p0/4183   | R01_cb8564_c3683/f1p0/4183   | NA                           |
| R01_cb8564_c4582/f1p0/2713   | NA                         | NA                           | NA                           | R01_cb8564_c4582/f1p0/2713   |
| R01_cb4861_c2/f1p0/2642      | NA                         | R01_cb4861_c2/f1p0/2642      | NA                           | R01_cb4861_c2/f1p0/2642      |
| R01_cb3485_c8/f1p0/2724      | NA                         | R01_cb3485_c8/f1p0/2724      | NA                           | NA                           |
| R01_cb8564_c20587/f1p0/3263  | NA                         | R01_cb8564_c20587/f1p0/3263  | NA                           | NA                           |
| R01_cb18456_c5422/f1p0/328   | R01_cb18456_c5422/f1p0/328 | R01_cb18456_c5422/f1p0/328   | NA                           | NA                           |
| R01_cb929_c8/f2p1/1843       | NA                         | NA                           | NA                           | R01_cb929_c8/f2p1/1843       |
| R01_cb8564_c10586/f1p1/2704  | NA                         | R01_cb8564_c10586/f1p1/2704  | NA                           | NA                           |
| R01_cb3703_c6/f1p0/1503      | NA                         | NA                           | NA                           | R01_cb3703_c6/f1p0/1503      |
| R01_cb10024_c550/f1p1/731    | NA                         | NA                           | R01_cb10024_c550/f1p1/731    | NA                           |
| R01_cb1392_c8/f1p0/2168      | NA                         | NA                           | NA                           | R01_cb1392_c8/f1p0/2168      |
| R01_cb8823_c10/f1p0/1628     | R01_cb8823_c10/f1p0/1628   | R01_cb8823_c10/f1p0/1628     | R01_cb8823_c10/f1p0/1628     | R01_cb8823_c10/f1p0/1628     |
| R01_cb3103_c3/f1p0/619       | R01_cb3103_c3/f1p0/619     | NA                           | NA                           | R01_cb3103_c3/f1p0/619       |
| R01_cb2160_c2/f5p1/2874      | NA                         | NA                           | NA                           | R01_cb2160_c2/f5p1/2874      |
| R01_cb16583_c0/f1p0/825      | R01_cb16583_c0/f1p0/825    | R01_cb16583_c0/f1p0/825      | R01_cb16583_c0/f1p0/825      | R01_cb16583_c0/f1p0/825      |
| R01_cb8564_c126610/f1p0/2193 | NA                         | R01_cb8564_c126610/f1p0/2193 | R01_cb8564_c126610/f1p0/2193 | R01_cb8564_c126610/f1p0/2193 |
| R01_cb9448_c5/f1p1/3236      | NA                         | NA                           | NA                           | R01_cb9448_c5/f1p1/3236      |
| R01_cb302_c10/f1p0/2852      | NA                         | NA                           | NA                           | R01_cb302_c10/f1p0/2852      |
| R01_cb4198_c11/f1p0/1410     | NA                         | R01_cb4198_c11/f1p0/1410     | NA                           | R01_cb4198_c11/f1p0/1410     |
| R01_cb2161_c11/f1p0/3342     | NA                         | R01_cb2161_c11/f1p0/3342     | NA                           | R01_cb2161_c11/f1p0/3342     |

|                             |                             |                             |                             |                             |
|-----------------------------|-----------------------------|-----------------------------|-----------------------------|-----------------------------|
| R01_cb17545_c0/f2p0/644     | NA                          | R01_cb17545_c0/f2p0/644     | NA                          | NA                          |
| R01_cb8564_c23592/flp1/1957 | R01_cb8564_c23592/flp1/1957 | R01_cb8564_c23592/flp1/1957 | R01_cb8564_c23592/flp1/1957 | R01_cb8564_c23592/flp1/1957 |
| R01_cb18456_c7431/flp0/725  | NA                          | NA                          | R01_cb18456_c7431/flp0/725  | R01_cb18456_c7431/flp0/725  |
| R01_cb3813_c2/flp0/4306     | NA                          | R01_cb3813_c2/flp0/4306     | NA                          | NA                          |
| R01_cb6839_c4/flp0/1242     | NA                          | R01_cb6839_c4/flp0/1242     | NA                          | NA                          |
| R01_cb16341_c0/fl0p1/607    | R01_cb16341_c0/fl0p1/607    | R01_cb16341_c0/fl0p1/607    | R01_cb16341_c0/fl0p1/607    | R01_cb16341_c0/fl0p1/607    |
| R01_cb16624_c3/flp0/805     | NA                          | R01_cb16624_c3/flp0/805     | NA                          | NA                          |
| R01_cb6824_c6/flp0/2411     | NA                          | R01_cb6824_c6/flp0/2411     | NA                          | NA                          |
| R01_cb8564_c18046/flp0/4035 | NA                          | R01_cb8564_c18046/flp0/4035 | NA                          | NA                          |
| R01_cb11693_c2/flp0/655     | NA                          | R01_cb11693_c2/flp0/655     | NA                          | NA                          |
| R01_cb8564_c90448/flp0/3951 | NA                          | R01_cb8564_c90448/flp0/3951 | NA                          | R01_cb8564_c90448/flp0/3951 |
| R01_cb8564_c33125/f7p0/2843 | R01_cb8564_c33125/f7p0/2843 | R01_cb8564_c33125/f7p0/2843 | R01_cb8564_c33125/f7p0/2843 | R01_cb8564_c33125/f7p0/2843 |
| R01_cb8564_c84197/flp0/2017 | R01_cb8564_c84197/flp0/2017 | R01_cb8564_c84197/flp0/2017 | R01_cb8564_c84197/flp0/2017 | R01_cb8564_c84197/flp0/2017 |
| R01_cb2226_c11/flp0/410     | NA                          | R01_cb2226_c11/flp0/410     | R01_cb2226_c11/flp0/410     | R01_cb2226_c11/flp0/410     |
| R01_cb2765_c2/flp0/3515     | NA                          | NA                          | NA                          | R01_cb2765_c2/flp0/3515     |
| R01_cb3359_c19/flp0/4140    | NA                          | R01_cb3359_c19/flp0/4140    | NA                          | NA                          |
| R01_cb4134_c47/f2p2/2895    | NA                          | NA                          | NA                          | R01_cb4134_c47/f2p2/2895    |
| R01_cb402_c32/flp0/2175     | NA                          | R01_cb402_c32/flp0/2175     | NA                          | R01_cb402_c32/flp0/2175     |
| R01_cb14822_c4/flp0/1148    | R01_cb14822_c4/flp0/1148    | R01_cb14822_c4/flp0/1148    | R01_cb14822_c4/flp0/1148    | R01_cb14822_c4/flp0/1148    |
| R01_cb69_c8/flp0/3468       | NA                          | NA                          | NA                          | R01_cb69_c8/flp0/3468       |
| R01_cb8564_c12266/f2p6/4222 | NA                          | R01_cb8564_c12266/f2p6/4222 | R01_cb8564_c12266/f2p6/4222 | R01_cb8564_c12266/f2p6/4222 |
| R01_cb8453_c3/flp0/2969     | NA                          | R01_cb8453_c3/flp0/2969     | NA                          | NA                          |
| R01_cb12837_c9/flp4/694     | NA                          | R01_cb12837_c9/flp4/694     | NA                          | NA                          |

|                              |                           |                              |                              |                              |
|------------------------------|---------------------------|------------------------------|------------------------------|------------------------------|
| R01_cb6913_c1/f1p0/2981      | NA                        | NA                           | NA                           | R01_cb6913_c1/f1p0/2981      |
| R01_cb8564_c115087/f1p0/2589 | NA                        | R01_cb8564_c115087/f1p0/2589 | R01_cb8564_c115087/f1p0/2589 | R01_cb8564_c115087/f1p0/2589 |
| R01_cb1961_c4/f1p0/927       | NA                        | R01_cb1961_c4/f1p0/927       | NA                           | NA                           |
| R01_cb8564_c850/f2p0/2585    | NA                        | NA                           | NA                           | R01_cb8564_c850/f2p0/2585    |
| R01_cb4818_c1/f2p0/3114      | NA                        | R01_cb4818_c1/f2p0/3114      | NA                           | NA                           |
| R01_cb3756_c15/f1p0/2679     | NA                        | R01_cb3756_c15/f1p0/2679     | NA                           | R01_cb3756_c15/f1p0/2679     |
| R01_cb10960_c1/f1p0/3420     | NA                        | NA                           | NA                           | R01_cb10960_c1/f1p0/3420     |
| R01_cb10190_c0/f2p0/1716     | R01_cb10190_c0/f2p0/1716  | R01_cb10190_c0/f2p0/1716     | R01_cb10190_c0/f2p0/1716     | R01_cb10190_c0/f2p0/1716     |
| R01_cb18456_c4735/f1p0/483   | NA                        | NA                           | NA                           | R01_cb18456_c4735/f1p0/483   |
| R01_cb13052_c1/f1p0/1774     | NA                        | NA                           | NA                           | R01_cb13052_c1/f1p0/1774     |
| R01_cb8564_c945/f5p5/4929    | NA                        | NA                           | NA                           | R01_cb8564_c945/f5p5/4929    |
| R01_cb12421_c47/f1p0/708     | R01_cb12421_c47/f1p0/708  | R01_cb12421_c47/f1p0/708     | NA                           | NA                           |
| R01_cb12641_c11/f1p2/1411    | NA                        | NA                           | NA                           | R01_cb12641_c11/f1p2/1411    |
| R01_cb18290_c1/f2p0/648      | R01_cb18290_c1/f2p0/648   | R01_cb18290_c1/f2p0/648      | NA                           | NA                           |
| R01_cb8564_c92135/f1p0/3001  | NA                        | R01_cb8564_c92135/f1p0/3001  | R01_cb8564_c92135/f1p0/3001  | R01_cb8564_c92135/f1p0/3001  |
| R01_cb4536_c3/f1p0/3276      | NA                        | NA                           | NA                           | R01_cb4536_c3/f1p0/3276      |
| R01_cb8564_c124728/f1p0/2228 | NA                        | NA                           | NA                           | R01_cb8564_c124728/f1p0/2228 |
| R01_cb18456_c6366/f1p0/1735  | NA                        | R01_cb18456_c6366/f1p0/1735  | NA                           | R01_cb18456_c6366/f1p0/1735  |
| R01_cb13158_c1/f1p0/945      | NA                        | NA                           | NA                           | R01_cb13158_c1/f1p0/945      |
| R01_cb8564_c53454/f1p0/3141  | NA                        | NA                           | R01_cb8564_c53454/f1p0/3141  | R01_cb8564_c53454/f1p0/3141  |
| R01_cb9910_c1/f1p0/1994      | NA                        | R01_cb9910_c1/f1p0/1994      | R01_cb9910_c1/f1p0/1994      | R01_cb9910_c1/f1p0/1994      |
| R01_cb2577_c16/f1p0/800      | NA                        | NA                           | NA                           | R01_cb2577_c16/f1p0/800      |
| R01_cb2856_c2/f1p0/3498      | NA                        | R01_cb2856_c2/f1p0/3498      | NA                           | NA                           |
| R01_cb13545_c36/f1p0/1853    | R01_cb13545_c36/f1p0/1853 | R01_cb13545_c36/f1p0/1853    | NA                           | NA                           |

|                              |                             |                             |                             |                              |
|------------------------------|-----------------------------|-----------------------------|-----------------------------|------------------------------|
| R01_cb12914_c14/f1p0/501     | NA                          | R01_cb12914_c14/f1p0/501    | R01_cb12914_c14/f1p0/501    | NA                           |
| R01_cb7257_c5/f1p0/1451      | NA                          | NA                          | NA                          | R01_cb7257_c5/f1p0/1451      |
| R01_cb7298_c1/f1p0/2736      | R01_cb7298_c1/f1p0/2736     | R01_cb7298_c1/f1p0/2736     | R01_cb7298_c1/f1p0/2736     | R01_cb7298_c1/f1p0/2736      |
| R01_cb12520_c8/f1p0/312      | R01_cb12520_c8/f1p0/312     | R01_cb12520_c8/f1p0/312     | NA                          | NA                           |
| R01_cb13601_c4/f1p0/817      | NA                          | NA                          | NA                          | R01_cb13601_c4/f1p0/817      |
| R01_cb8564_c68731/f4p0/2840  | R01_cb8564_c68731/f4p0/2840 | R01_cb8564_c68731/f4p0/2840 | R01_cb8564_c68731/f4p0/2840 | R01_cb8564_c68731/f4p0/2840  |
| R01_cb8564_c36812/f1p0/2231  | NA                          | NA                          | NA                          | R01_cb8564_c36812/f1p0/2231  |
| R01_cb16555_c4/f1p0/445      | NA                          | NA                          | NA                          | R01_cb16555_c4/f1p0/445      |
| R01_cb15100_c1/f1p0/761      | NA                          | NA                          | NA                          | R01_cb15100_c1/f1p0/761      |
| R01_cb10713_c0/f1p0/1578     | NA                          | R01_cb10713_c0/f1p0/1578    | NA                          | NA                           |
| R01_cb8564_c83795/f2p1/2099  | NA                          | R01_cb8564_c83795/f2p1/2099 | R01_cb8564_c83795/f2p1/2099 | R01_cb8564_c83795/f2p1/2099  |
| R01_cb17363_c8/f1p0/757      | NA                          | R01_cb17363_c8/f1p0/757     | R01_cb17363_c8/f1p0/757     | R01_cb17363_c8/f1p0/757      |
| R01_cb2160_c11/f1p1/2859     | NA                          | NA                          | NA                          | R01_cb2160_c11/f1p1/2859     |
| R01_cb8285_c1/f1p0/2591      | NA                          | NA                          | NA                          | R01_cb8285_c1/f1p0/2591      |
| R01_cb12563_c5/f1p0/1064     | NA                          | R01_cb12563_c5/f1p0/1064    | NA                          | NA                           |
| R01_cb8564_c79125/f3p5/2158  | NA                          | R01_cb8564_c79125/f3p5/2158 | R01_cb8564_c79125/f3p5/2158 | R01_cb8564_c79125/f3p5/2158  |
| R01_cb16452_c3/f1p0/381      | R01_cb16452_c3/f1p0/381     | R01_cb16452_c3/f1p0/381     | R01_cb16452_c3/f1p0/381     | R01_cb16452_c3/f1p0/381      |
| R01_cb15680_c4/f1p0/1710     | NA                          | NA                          | NA                          | R01_cb15680_c4/f1p0/1710     |
| R01_cb8564_c89842/f1p0/2302  | R01_cb8564_c89842/f1p0/2302 | R01_cb8564_c89842/f1p0/2302 | NA                          | NA                           |
| R01_cb1610_c3/f1p0/3811      | NA                          | NA                          | NA                          | R01_cb1610_c3/f1p0/3811      |
| R01_cb10909_c3/f1p0/1894     | NA                          | NA                          | NA                          | R01_cb10909_c3/f1p0/1894     |
| R01_cb10070_c2/f1p0/3977     | NA                          | NA                          | NA                          | R01_cb10070_c2/f1p0/3977     |
| R01_cb8564_c129323/f1p0/2414 | NA                          | NA                          | NA                          | R01_cb8564_c129323/f1p0/2414 |

|                             |                             |                             |                             |                             |
|-----------------------------|-----------------------------|-----------------------------|-----------------------------|-----------------------------|
| R01_cb7623_c28/f1p1/2038    | NA                          | R01_cb7623_c28/f1p1/2038    | NA                          | NA                          |
| R01_cb12645_c1/f1p0/1486    | NA                          | R01_cb12645_c1/f1p0/1486    | NA                          | NA                          |
| R01_cb8564_c53457/f2p0/2821 | R01_cb8564_c53457/f2p0/2821 | R01_cb8564_c53457/f2p0/2821 | R01_cb8564_c53457/f2p0/2821 | R01_cb8564_c53457/f2p0/2821 |
| R01_cb4543_c1/f1p0/3821     | NA                          | R01_cb4543_c1/f1p0/3821     | R01_cb4543_c1/f1p0/3821     | NA                          |
| R01_cb17431_c0/f3p0/1394    | NA                          | NA                          | NA                          | R01_cb17431_c0/f3p0/1394    |
| R01_cb17637_c4/f1p0/586     | NA                          | R01_cb17637_c4/f1p0/586     | NA                          | NA                          |
| R01_cb17623_c2/f1p0/634     | NA                          | NA                          | NA                          | R01_cb17623_c2/f1p0/634     |
| R01_cb4784_c11/f2p1/2086    | NA                          | NA                          | NA                          | R01_cb4784_c11/f2p1/2086    |
| R01_cb17305_c3/f2p1/753     | NA                          | R01_cb17305_c3/f2p1/753     | NA                          | R01_cb17305_c3/f2p1/753     |
| R01_cb9771_c0/f1p0/1982     | NA                          | NA                          | NA                          | R01_cb9771_c0/f1p0/1982     |
| R01_cb18456_c6669/f1p1/530  | R01_cb18456_c6669/f1p1/530  | R01_cb18456_c6669/f1p1/530  | R01_cb18456_c6669/f1p1/530  | R01_cb18456_c6669/f1p1/530  |
| R01_cb18730_c1/f1p0/1824    | R01_cb18730_c1/f1p0/1824    | R01_cb18730_c1/f1p0/1824    | R01_cb18730_c1/f1p0/1824    | R01_cb18730_c1/f1p0/1824    |
| R01_cb2698_c3/f1p0/1964     | NA                          | NA                          | NA                          | R01_cb2698_c3/f1p0/1964     |
| R01_cb17361_c0/f2p0/380     | R01_cb17361_c0/f2p0/380     | R01_cb17361_c0/f2p0/380     | R01_cb17361_c0/f2p0/380     | R01_cb17361_c0/f2p0/380     |
| R01_cb13503_c0/f1p0/972     | NA                          | R01_cb13503_c0/f1p0/972     | NA                          | R01_cb13503_c0/f1p0/972     |
| R01_cb8564_c43362/f1p0/3852 | NA                          | R01_cb8564_c43362/f1p0/3852 | NA                          | R01_cb8564_c43362/f1p0/3852 |
| R01_cb9271_c2/f2p0/1798     | NA                          | R01_cb9271_c2/f2p0/1798     | NA                          | NA                          |
| R01_cb3516_c0/f2p0/2634     | NA                          | NA                          | NA                          | R01_cb3516_c0/f2p0/2634     |
| R01_cb14267_c1/f1p0/1285    | NA                          | R01_cb14267_c1/f1p0/1285    | NA                          | R01_cb14267_c1/f1p0/1285    |
| R01_cb18456_c7309/f1p0/831  | R01_cb18456_c7309/f1p0/831  | R01_cb18456_c7309/f1p0/831  | R01_cb18456_c7309/f1p0/831  | R01_cb18456_c7309/f1p0/831  |
| R01_cb18728_c1/f1p0/3563    | NA                          | NA                          | NA                          | R01_cb18728_c1/f1p0/3563    |
| R01_cb6278_c4/f1p0/3465     | NA                          | NA                          | NA                          | R01_cb6278_c4/f1p0/3465     |
| R01_cb12246_c5/f1p0/515     | R01_cb12246_c5/f1p0/515     | R01_cb12246_c5/f1p0/515     | R01_cb12246_c5/f1p0/515     | R01_cb12246_c5/f1p0/515     |
| R01_cb12837_c1/f1p4/665     | NA                          | R01_cb12837_c1/f1p4/665     | NA                          | NA                          |
| R01_cb18201_c1/f1p0/716     | R01_cb18201_c1/f1p0/716     | R01_cb18201_c1/f1p0/716     | R01_cb18201_c1/f1p0/716     | R01_cb18201_c1/f1p0/716     |

|                              |                             |                              |                         |                             |
|------------------------------|-----------------------------|------------------------------|-------------------------|-----------------------------|
| R01_cb16426_c2/flp0/726      | NA                          | R01_cb16426_c2/flp0/726      | NA                      | NA                          |
| R01_cb7490_c0/f2p0/1667      | NA                          | R01_cb7490_c0/f2p0/1667      | NA                      | NA                          |
| R01_cb12722_c23/flp1/1704    | NA                          | NA                           | NA                      | R01_cb12722_c23/flp1/1704   |
| R01_cb188_c2/flp1/3428       | NA                          | NA                           | NA                      | R01_cb188_c2/flp1/3428      |
| R01_cb14480_c8/flp0/613      | NA                          | R01_cb14480_c8/flp0/613      | R01_cb14480_c8/flp0/613 | R01_cb14480_c8/flp0/613     |
| R01_cb13184_c1/flp0/483      | R01_cb13184_c1/flp0/483     | R01_cb13184_c1/flp0/483      | R01_cb13184_c1/flp0/483 | R01_cb13184_c1/flp0/483     |
| R01_cb1849_c22/flp0/1764     | NA                          | NA                           | NA                      | R01_cb1849_c22/flp0/1764    |
| R01_cb7096_c26/flp1/2579     | NA                          | R01_cb7096_c26/flp1/2579     | NA                      | NA                          |
| R01_cb8564_c79050/flp0/2508  | R01_cb8564_c79050/flp0/2508 | R01_cb8564_c79050/flp0/2508  | NA                      | NA                          |
| R01_cb8564_c121529/flp0/3063 | NA                          | R01_cb8564_c121529/flp0/3063 | NA                      | NA                          |
| R01_cb7278_c4/flp0/2180      | NA                          | R01_cb7278_c4/flp0/2180      | NA                      | NA                          |
| R01_cb16410_c2/flp1/529      | NA                          | NA                           | NA                      | R01_cb16410_c2/flp1/529     |
| R01_cb14343_c0/f5p0/585      | NA                          | R01_cb14343_c0/f5p0/585      | NA                      | NA                          |
| R01_cb14291_c5/flp0/1400     | NA                          | NA                           | NA                      | R01_cb14291_c5/flp0/1400    |
| R01_cb9750_c4/flp1/1951      | NA                          | NA                           | NA                      | R01_cb9750_c4/flp1/1951     |
| R01_cb7238_c3/flp0/931       | NA                          | R01_cb7238_c3/flp0/931       | NA                      | NA                          |
| R01_cb735_c5/flp1/2153       | NA                          | NA                           | NA                      | R01_cb735_c5/flp1/2153      |
| R01_cb18456_c1258/f4p4/671   | NA                          | R01_cb18456_c1258/f4p4/671   | NA                      | NA                          |
| R01_cb8564_c82723/flp0/3877  | NA                          | R01_cb8564_c82723/flp0/3877  | NA                      | R01_cb8564_c82723/flp0/3877 |
| R01_cb10024_c231/flp0/748    | NA                          | R01_cb10024_c231/flp0/748    | NA                      | NA                          |
| R01_cb17000_c1/flp0/381      | R01_cb17000_c1/flp0/381     | R01_cb17000_c1/flp0/381      | R01_cb17000_c1/flp0/381 | R01_cb17000_c1/flp0/381     |
| R01_cb2451_c31/flp1/3158     | NA                          | NA                           | NA                      | R01_cb2451_c31/flp1/3158    |
| R01_cb18197_c2/flp0/413      | NA                          | NA                           | R01_cb18197_c2/flp0/413 | R01_cb18197_c2/flp0/413     |
| R01_cb8564_c117246/flp0/234  | NA                          | R01_cb8564_c117246/flp0/234  | NA                      | NA                          |

|                             |                          |                             |                             |                             |
|-----------------------------|--------------------------|-----------------------------|-----------------------------|-----------------------------|
| 7                           |                          | 7                           |                             |                             |
| R01_cb12504_c3/flp0/817     | R01_cb12504_c3/flp0/817  | R01_cb12504_c3/flp0/817     | NA                          | R01_cb12504_c3/flp0/817     |
| R01_cb9829_c0/f2p2/1972     | NA                       | NA                          | NA                          | R01_cb9829_c0/f2p2/1972     |
| R01_cb18207_c3/flp0/674     | R01_cb18207_c3/flp0/674  | R01_cb18207_c3/flp0/674     | R01_cb18207_c3/flp0/674     | R01_cb18207_c3/flp0/674     |
| R01_cb13570_c19/flp1/1629   | NA                       | R01_cb13570_c19/flp1/1629   | NA                          | NA                          |
| R01_cb18409_c27/f2p0/476    | R01_cb18409_c27/f2p0/476 | R01_cb18409_c27/f2p0/476    | R01_cb18409_c27/f2p0/476    | R01_cb18409_c27/f2p0/476    |
| R01_cb8564_c22201/flp0/2016 | NA                       | R01_cb8564_c22201/flp0/2016 | R01_cb8564_c22201/flp0/2016 | R01_cb8564_c22201/flp0/2016 |
| R01_cb8486_c2/flp0/2933     | NA                       | R01_cb8486_c2/flp0/2933     | NA                          | NA                          |
| R01_cb6236_c3/flp1/1832     | NA                       | NA                          | NA                          | R01_cb6236_c3/flp1/1832     |
| R01_cb4657_c19/flp0/3255    | NA                       | R01_cb4657_c19/flp0/3255    | NA                          | R01_cb4657_c19/flp0/3255    |
| R01_cb6606_c36/flp0/575     | R01_cb6606_c36/flp0/575  | R01_cb6606_c36/flp0/575     | R01_cb6606_c36/flp0/575     | R01_cb6606_c36/flp0/575     |
| R01_cb48_c6/flp0/4255       | NA                       | NA                          | NA                          | R01_cb48_c6/flp0/4255       |
| R01_cb7177_c16/flp1/603     | NA                       | R01_cb7177_c16/flp1/603     | NA                          | R01_cb7177_c16/flp1/603     |
| R01_cb18286_c1/flp0/649     | NA                       | R01_cb18286_c1/flp0/649     | R01_cb18286_c1/flp0/649     | R01_cb18286_c1/flp0/649     |
| R01_cb8450_c0/flp0/2366     | NA                       | R01_cb8450_c0/flp0/2366     | NA                          | NA                          |
| R01_cb8030_c6/f2p0/2476     | NA                       | NA                          | NA                          | R01_cb8030_c6/f2p0/2476     |
| R01_cb16394_c2/flp0/656     | R01_cb16394_c2/flp0/656  | R01_cb16394_c2/flp0/656     | R01_cb16394_c2/flp0/656     | R01_cb16394_c2/flp0/656     |
| R01_cb10404_c1/flp0/1471    | NA                       | R01_cb10404_c1/flp0/1471    | NA                          | NA                          |
| R01_cb4233_c22/f4p0/2215    | NA                       | R01_cb4233_c22/f4p0/2215    | R01_cb4233_c22/f4p0/2215    | R01_cb4233_c22/f4p0/2215    |
| R01_cb8564_c114239/flp0/201 | NA                       | R01_cb8564_c114239/flp0/201 | R01_cb8564_c114239/flp0/201 | R01_cb8564_c114239/flp0/201 |
| 3                           |                          | 3                           | 3                           | 3                           |
| R01_cb17756_c18/flp0/479    | R01_cb17756_c18/flp0/479 | R01_cb17756_c18/flp0/479    | R01_cb17756_c18/flp0/479    | R01_cb17756_c18/flp0/479    |
| R01_cb4805_c26/flp0/1241    | NA                       | NA                          | NA                          | R01_cb4805_c26/flp0/1241    |
| R01_cb18409_c37/flp0/705    | NA                       | R01_cb18409_c37/flp0/705    | R01_cb18409_c37/flp0/705    | R01_cb18409_c37/flp0/705    |
| R01_cb8564_c25056/flp0/3992 | NA                       | NA                          | NA                          | R01_cb8564_c25056/flp0/3992 |
| R01_cb2154_c6/flp1/3494     | NA                       | R01_cb2154_c6/flp1/3494     | NA                          | NA                          |



|                              |                             |                              |                              |                              |
|------------------------------|-----------------------------|------------------------------|------------------------------|------------------------------|
| R01_cb9047_c2/f1p0/2190      | NA                          | NA                           | NA                           | R01_cb9047_c2/f1p0/2190      |
| R01_cb12369_c10/f1p0/591     | NA                          | NA                           | R01_cb12369_c10/f1p0/591     | NA                           |
| R01_cb8564_c13489/f1p1/3370  | NA                          | R01_cb8564_c13489/f1p1/3370  | R01_cb8564_c13489/f1p1/3370  | NA                           |
| R01_cb323_c4/f1p1/1598       | NA                          | R01_cb323_c4/f1p1/1598       | NA                           | NA                           |
| R01_cb15777_c3/f1p0/1011     | NA                          | NA                           | NA                           | R01_cb15777_c3/f1p0/1011     |
| R01_cb18456_c1270/f7p0/532   | NA                          | R01_cb18456_c1270/f7p0/532   | R01_cb18456_c1270/f7p0/532   | R01_cb18456_c1270/f7p0/532   |
| R01_cb12520_c6/f1p0/497      | NA                          | R01_cb12520_c6/f1p0/497      | NA                           | NA                           |
| R01_cb11595_c1/f1p0/2065     | NA                          | R01_cb11595_c1/f1p0/2065     | NA                           | NA                           |
| R01_cb822_c32/f1p1/5821      | NA                          | NA                           | NA                           | R01_cb822_c32/f1p1/5821      |
| R01_cb8564_c69295/f2p0/2365  | R01_cb8564_c69295/f2p0/2365 | R01_cb8564_c69295/f2p0/2365  | R01_cb8564_c69295/f2p0/2365  | R01_cb8564_c69295/f2p0/2365  |
| R01_cb5929_c4/f1p0/2726      | NA                          | NA                           | NA                           | R01_cb5929_c4/f1p0/2726      |
| R01_cb8564_c54465/f1p10/4380 | NA                          | R01_cb8564_c54465/f1p10/4380 | R01_cb8564_c54465/f1p10/4380 | R01_cb8564_c54465/f1p10/4380 |
| R01_cb12520_c4/f1p0/593      | NA                          | R01_cb12520_c4/f1p0/593      | NA                           | NA                           |
| R01_cb1030_c26/f1p0/3872     | NA                          | R01_cb1030_c26/f1p0/3872     | NA                           | NA                           |
| R01_cb15683_c3/f1p0/1701     | NA                          | NA                           | NA                           | R01_cb15683_c3/f1p0/1701     |
| R01_cb2804_c93/f1p0/3636     | NA                          | R01_cb2804_c93/f1p0/3636     | NA                           | NA                           |
| R01_cb18126_c0/f2p0/1239     | NA                          | NA                           | NA                           | R01_cb18126_c0/f2p0/1239     |
| R01_cb16452_c12/f1p0/954     | NA                          | R01_cb16452_c12/f1p0/954     | R01_cb16452_c12/f1p0/954     | R01_cb16452_c12/f1p0/954     |
| R01_cb1259_c24/f1p0/3670     | NA                          | NA                           | NA                           | R01_cb1259_c24/f1p0/3670     |
| R01_cb1388_c6/f1p0/4623      | NA                          | NA                           | NA                           | R01_cb1388_c6/f1p0/4623      |
| R01_cb6101_c4/f1p0/2753      | NA                          | R01_cb6101_c4/f1p0/2753      | NA                           | NA                           |
| R01_cb13516_c4/f1p0/1066     | NA                          | R01_cb13516_c4/f1p0/1066     | NA                           | NA                           |
| R01_cb1138_c54/f74p1/813     | NA                          | NA                           | R01_cb1138_c54/f74p1/813     | R01_cb1138_c54/f74p1/813     |
| R01_cb11451_c0/f1p0/1319     | NA                          | R01_cb11451_c0/f1p0/1319     | NA                           | NA                           |

|                              |                          |                             |                             |                              |
|------------------------------|--------------------------|-----------------------------|-----------------------------|------------------------------|
| R01_cb8564_c38676/f2p0/4590  | NA                       | R01_cb8564_c38676/f2p0/4590 | R01_cb8564_c38676/f2p0/4590 | NA                           |
| R01_cb12148_c15/f1p0/613     | R01_cb12148_c15/f1p0/613 | R01_cb12148_c15/f1p0/613    | R01_cb12148_c15/f1p0/613    | R01_cb12148_c15/f1p0/613     |
| R01_cb9594_c6/f1p0/2076      | R01_cb9594_c6/f1p0/2076  | R01_cb9594_c6/f1p0/2076     | NA                          | NA                           |
| R01_cb11972_c0/f3p0/1590     | NA                       | NA                          | NA                          | R01_cb11972_c0/f3p0/1590     |
| R01_cb8766_c3/f1p1/2108      | NA                       | R01_cb8766_c3/f1p1/2108     | NA                          | NA                           |
| R01_cb13230_c1/f8p0/643      | NA                       | R01_cb13230_c1/f8p0/643     | NA                          | NA                           |
| R01_cb5641_c10/f1p0/2482     | NA                       | R01_cb5641_c10/f1p0/2482    | NA                          | NA                           |
| R01_cb15740_c0/f2p0/626      | NA                       | R01_cb15740_c0/f2p0/626     | NA                          | NA                           |
| R01_cb6377_c3/f1p0/2534      | NA                       | NA                          | NA                          | R01_cb6377_c3/f1p0/2534      |
| R01_cb2226_c5/f1p0/4574      | NA                       | NA                          | NA                          | R01_cb2226_c5/f1p0/4574      |
| R01_cb8564_c24589/f1p0/3831  | NA                       | R01_cb8564_c24589/f1p0/3831 | NA                          | R01_cb8564_c24589/f1p0/3831  |
| R01_cb8564_c113776/f1p0/1903 | NA                       | NA                          | NA                          | R01_cb8564_c113776/f1p0/1903 |
| R01_cb18076_c1/f1p1/1784     | NA                       | R01_cb18076_c1/f1p1/1784    | R01_cb18076_c1/f1p1/1784    | R01_cb18076_c1/f1p1/1784     |
| R01_cb18110_c0/f2p0/412      | R01_cb18110_c0/f2p0/412  | R01_cb18110_c0/f2p0/412     | R01_cb18110_c0/f2p0/412     | R01_cb18110_c0/f2p0/412      |
| R01_cb3854_c0/f1p0/3504      | NA                       | R01_cb3854_c0/f1p0/3504     | R01_cb3854_c0/f1p0/3504     | NA                           |
| R01_cb2482_c27/f1p0/2405     | NA                       | NA                          | NA                          | R01_cb2482_c27/f1p0/2405     |
| R01_cb16066_c2/f2p0/548      | R01_cb16066_c2/f2p0/548  | R01_cb16066_c2/f2p0/548     | R01_cb16066_c2/f2p0/548     | NA                           |
| R01_cb2352_c7/f1p0/2975      | NA                       | R01_cb2352_c7/f1p0/2975     | R01_cb2352_c7/f1p0/2975     | R01_cb2352_c7/f1p0/2975      |
| R01_cb10292_c4/f1p0/1095     | NA                       | R01_cb10292_c4/f1p0/1095    | NA                          | R01_cb10292_c4/f1p0/1095     |
| R01_cb11434_c2/f1p0/1168     | NA                       | R01_cb11434_c2/f1p0/1168    | R01_cb11434_c2/f1p0/1168    | R01_cb11434_c2/f1p0/1168     |
| R01_cb14239_c20/f1p0/1013    | NA                       | R01_cb14239_c20/f1p0/1013   | NA                          | NA                           |
| R01_cb4047_c4/f3p2/2787      | NA                       | NA                          | NA                          | R01_cb4047_c4/f3p2/2787      |
| R01_cb8564_c50280/f1p1/3354  | NA                       | NA                          | NA                          | R01_cb8564_c50280/f1p1/3354  |
| R01_cb10294_c7/f1p0/1637     | NA                       | R01_cb10294_c7/f1p0/1637    | NA                          | NA                           |
| R01_cb8564_c12936/f1p0/2488  | NA                       | R01_cb8564_c12936/f1p0/2488 | NA                          | NA                           |

|                                  |                            |                                  |                                  |                                  |
|----------------------------------|----------------------------|----------------------------------|----------------------------------|----------------------------------|
| R01_cb8564_c126992/flp0/233<br>2 | NA                         | R01_cb8564_c126992/flp0/233<br>2 | R01_cb8564_c126992/flp0/233<br>2 | R01_cb8564_c126992/flp0/233<br>2 |
| R01_cb18409_c21/f3p0/636         | R01_cb18409_c21/f3p0/636   | R01_cb18409_c21/f3p0/636         | R01_cb18409_c21/f3p0/636         | R01_cb18409_c21/f3p0/636         |
| R01_cb14550_c1/flp0/1088         | NA                         | R01_cb14550_c1/flp0/1088         | NA                               | NA                               |
| R01_cb4824_c14/flp0/3079         | NA                         | R01_cb4824_c14/flp0/3079         | R01_cb4824_c14/flp0/3079         | R01_cb4824_c14/flp0/3079         |
| R01_cb18456_c6078/flp1/662       | R01_cb18456_c6078/flp1/662 | R01_cb18456_c6078/flp1/662       | R01_cb18456_c6078/flp1/662       | R01_cb18456_c6078/flp1/662       |
| R01_cb261_c21/flp0/2395          | NA                         | NA                               | NA                               | R01_cb261_c21/flp0/2395          |
| R01_cb10587_c3/flp0/1346         | R01_cb10587_c3/flp0/1346   | R01_cb10587_c3/flp0/1346         | R01_cb10587_c3/flp0/1346         | R01_cb10587_c3/flp0/1346         |
| R01_cb10615_c1/flp0/2361         | NA                         | R01_cb10615_c1/flp0/2361         | NA                               | NA                               |
| R01_cb13603_c8/flp0/539          | R01_cb13603_c8/flp0/539    | R01_cb13603_c8/flp0/539          | R01_cb13603_c8/flp0/539          | R01_cb13603_c8/flp0/539          |
| R01_cb9081_c5/flp0/393           | R01_cb9081_c5/flp0/393     | R01_cb9081_c5/flp0/393           | R01_cb9081_c5/flp0/393           | R01_cb9081_c5/flp0/393           |
| R01_cb12634_c1/flp0/1616         | NA                         | R01_cb12634_c1/flp0/1616         | R01_cb12634_c1/flp0/1616         | R01_cb12634_c1/flp0/1616         |
| R01_cb7255_c22/flp0/2485         | NA                         | R01_cb7255_c22/flp0/2485         | NA                               | NA                               |
| R01_cb15618_c0/flp0/1084         | NA                         | NA                               | NA                               | R01_cb15618_c0/flp0/1084         |
| R01_cb6845_c11/flp0/2823         | NA                         | NA                               | NA                               | R01_cb6845_c11/flp0/2823         |
| R01_cb16535_c2/flp0/398          | R01_cb16535_c2/flp0/398    | R01_cb16535_c2/flp0/398          | NA                               | R01_cb16535_c2/flp0/398          |
| R01_cb2700_c11/flp0/2641         | NA                         | R01_cb2700_c11/flp0/2641         | NA                               | NA                               |
| R01_cb7954_c1/flp0/3299          | NA                         | R01_cb7954_c1/flp0/3299          | NA                               | R01_cb7954_c1/flp0/3299          |
| R01_cb8564_c128383/flp0/280<br>6 | NA                         | R01_cb8564_c128383/flp0/280<br>6 | R01_cb8564_c128383/flp0/280<br>6 | R01_cb8564_c128383/flp0/280<br>6 |
| R01_cb8564_c89038/flp0/2799      | NA                         | NA                               | NA                               | R01_cb8564_c89038/flp0/2799      |
| R01_cb8564_c21799/flp1/2554      | NA                         | R01_cb8564_c21799/flp1/2554      | R01_cb8564_c21799/flp1/2554      | NA                               |
| R01_cb7087_c3/flp0/2513          | NA                         | NA                               | NA                               | R01_cb7087_c3/flp0/2513          |
| R01_cb3699_c15/flp0/3193         | NA                         | R01_cb3699_c15/flp0/3193         | NA                               | NA                               |
| R01_cb15844_c3/flp0/743          | R01_cb15844_c3/flp0/743    | R01_cb15844_c3/flp0/743          | R01_cb15844_c3/flp0/743          | R01_cb15844_c3/flp0/743          |
| R01_cb943_c6/flp0/7019           | NA                         | R01_cb943_c6/flp0/7019           | NA                               | R01_cb943_c6/flp0/7019           |

|                             |                         |                             |                             |                             |
|-----------------------------|-------------------------|-----------------------------|-----------------------------|-----------------------------|
| R01_cb3563_c10/flp0/1620    | NA                      | NA                          | NA                          | R01_cb3563_c10/flp0/1620    |
| R01_cb17375_c1/flp0/1899    | NA                      | R01_cb17375_c1/flp0/1899    | R01_cb17375_c1/flp0/1899    | R01_cb17375_c1/flp0/1899    |
| R01_cb15730_c7/flp0/727     | NA                      | R01_cb15730_c7/flp0/727     | NA                          | R01_cb15730_c7/flp0/727     |
| R01_cb5637_c4/flp0/3052     | NA                      | R01_cb5637_c4/flp0/3052     | NA                          | NA                          |
| R01_cb10172_c8/flp0/491     | R01_cb10172_c8/flp0/491 | R01_cb10172_c8/flp0/491     | R01_cb10172_c8/flp0/491     | R01_cb10172_c8/flp0/491     |
| R01_cb4315_c0/flp0/3374     | NA                      | R01_cb4315_c0/flp0/3374     | NA                          | R01_cb4315_c0/flp0/3374     |
| R01_cb12628_c2/flp0/690     | NA                      | R01_cb12628_c2/flp0/690     | R01_cb12628_c2/flp0/690     | R01_cb12628_c2/flp0/690     |
| R01_cb18456_c7370/flp0/1428 | NA                      | R01_cb18456_c7370/flp0/1428 | R01_cb18456_c7370/flp0/1428 | R01_cb18456_c7370/flp0/1428 |
| R01_cb16475_c1/flp0/459     | R01_cb16475_c1/flp0/459 | R01_cb16475_c1/flp0/459     | R01_cb16475_c1/flp0/459     | R01_cb16475_c1/flp0/459     |
| R01_cb6715_c2/flp0/6268     | NA                      | NA                          | NA                          | R01_cb6715_c2/flp0/6268     |
| R01_cb8034_c4/flp0/2400     | NA                      | R01_cb8034_c4/flp0/2400     | NA                          | NA                          |
| R01_cb17475_c1/flp0/680     | NA                      | R01_cb17475_c1/flp0/680     | R01_cb17475_c1/flp0/680     | R01_cb17475_c1/flp0/680     |
| R01_cb8660_c6/flp0/2305     | NA                      | NA                          | NA                          | R01_cb8660_c6/flp0/2305     |
| R01_cb9791_c2/flp0/1020     | NA                      | NA                          | R01_cb9791_c2/flp0/1020     | R01_cb9791_c2/flp0/1020     |
| R01_cb11287_c2/flp0/718     | NA                      | NA                          | NA                          | R01_cb11287_c2/flp0/718     |
| R01_cb4352_c8/flp0/2475     | NA                      | NA                          | NA                          | R01_cb4352_c8/flp0/2475     |
| R01_cb1813_c11/flp0/2690    | NA                      | NA                          | NA                          | R01_cb1813_c11/flp0/2690    |
| R01_cb3381_c29/flp0/2827    | NA                      | NA                          | NA                          | R01_cb3381_c29/flp0/2827    |
| R01_cb15537_c0/f2p0/567     | NA                      | R01_cb15537_c0/f2p0/567     | R01_cb15537_c0/f2p0/567     | R01_cb15537_c0/f2p0/567     |
| R01_cb119_c5/f2p0/2267      | NA                      | NA                          | NA                          | R01_cb119_c5/f2p0/2267      |
| R01_cb5000_c6/flp0/3452     | R01_cb5000_c6/flp0/3452 | R01_cb5000_c6/flp0/3452     | R01_cb5000_c6/flp0/3452     | R01_cb5000_c6/flp0/3452     |
| R01_cb6861_c14/flp0/2704    | NA                      | R01_cb6861_c14/flp0/2704    | NA                          | NA                          |
| R01_cb17973_c46/flp0/1810   | NA                      | NA                          | R01_cb17973_c46/flp0/1810   | R01_cb17973_c46/flp0/1810   |
| R01_cb11368_c1/flp0/2504    | NA                      | R01_cb11368_c1/flp0/2504    | NA                          | R01_cb11368_c1/flp0/2504    |
| R01_cb124_c20/flp0/3752     | NA                      | NA                          | NA                          | R01_cb124_c20/flp0/3752     |
| R01_cb15365_c6/flp0/412     | R01_cb15365_c6/flp0/412 | R01_cb15365_c6/flp0/412     | R01_cb15365_c6/flp0/412     | R01_cb15365_c6/flp0/412     |

|                              |                             |                             |                             |                              |
|------------------------------|-----------------------------|-----------------------------|-----------------------------|------------------------------|
| R01_cb3821_c26/flp0/3122     | R01_cb3821_c26/flp0/3122    | R01_cb3821_c26/flp0/3122    | NA                          | NA                           |
| R01_cb8111_c2/flp0/1357      | NA                          | NA                          | NA                          | R01_cb8111_c2/flp0/1357      |
| R01_cb750_c11/flp0/4465      | NA                          | R01_cb750_c11/flp0/4465     | NA                          | NA                           |
| R01_cb18456_c1525/f3p0/751   | R01_cb18456_c1525/f3p0/751  | R01_cb18456_c1525/f3p0/751  | R01_cb18456_c1525/f3p0/751  | R01_cb18456_c1525/f3p0/751   |
| R01_cb2698_c8/flp0/1316      | NA                          | NA                          | NA                          | R01_cb2698_c8/flp0/1316      |
| R01_cb4768_c36/flp0/2589     | NA                          | R01_cb4768_c36/flp0/2589    | NA                          | NA                           |
| R01_cb18456_c7393/flp0/753   | NA                          | R01_cb18456_c7393/flp0/753  | R01_cb18456_c7393/flp0/753  | R01_cb18456_c7393/flp0/753   |
| R01_cb18407_c0/flp0/1353     | NA                          | NA                          | NA                          | R01_cb18407_c0/flp0/1353     |
| R01_cb11832_c0/flp0/1296     | NA                          | NA                          | R01_cb11832_c0/flp0/1296    | NA                           |
| R01_cb8564_c34110/f2p1/1939  | NA                          | NA                          | NA                          | R01_cb8564_c34110/f2p1/1939  |
| R01_cb8820_c5/flp0/1671      | NA                          | R01_cb8820_c5/flp0/1671     | NA                          | NA                           |
| R01_cb3760_c11/f6p1/2235     | NA                          | NA                          | NA                          | R01_cb3760_c11/f6p1/2235     |
| R01_cb8564_c24389/flp0/2236  | R01_cb8564_c24389/flp0/2236 | R01_cb8564_c24389/flp0/2236 | NA                          | NA                           |
| R01_cb8564_c127636/flp0/2157 | NA                          | NA                          | NA                          | R01_cb8564_c127636/flp0/2157 |
| R01_cb18233_c1/flp0/1393     | NA                          | NA                          | NA                          | R01_cb18233_c1/flp0/1393     |
| R01_cb5900_c74/flp0/3322     | NA                          | R01_cb5900_c74/flp0/3322    | R01_cb5900_c74/flp0/3322    | R01_cb5900_c74/flp0/3322     |
| R01_cb9772_c6/flp0/1847      | NA                          | R01_cb9772_c6/flp0/1847     | NA                          | NA                           |
| R01_cb12972_c4/f2p0/666      | NA                          | R01_cb12972_c4/f2p0/666     | R01_cb12972_c4/f2p0/666     | R01_cb12972_c4/f2p0/666      |
| R01_cb18456_c7618/flp0/1166  | NA                          | R01_cb18456_c7618/flp0/1166 | R01_cb18456_c7618/flp0/1166 | R01_cb18456_c7618/flp0/1166  |
| R01_cb2095_c9/flp1/3903      | NA                          | NA                          | NA                          | R01_cb2095_c9/flp1/3903      |
| R01_cb11554_c0/flp0/934      | NA                          | R01_cb11554_c0/flp0/934     | R01_cb11554_c0/flp0/934     | R01_cb11554_c0/flp0/934      |
| R01_cb11455_c2/flp0/2807     | NA                          | R01_cb11455_c2/flp0/2807    | NA                          | R01_cb11455_c2/flp0/2807     |
| R01_cb1739_c7/flp0/5956      | NA                          | NA                          | NA                          | R01_cb1739_c7/flp0/5956      |
| R01_cb17097_c0/flp0/643      | NA                          | R01_cb17097_c0/flp0/643     | NA                          | R01_cb17097_c0/flp0/643      |

|                             |                          |                             |                             |                             |
|-----------------------------|--------------------------|-----------------------------|-----------------------------|-----------------------------|
| R01_cb8564_c76262/flp0/3001 | NA                       | R01_cb8564_c76262/flp0/3001 | NA                          | NA                          |
| R01_cb6365_c0/f5p2/1956     | NA                       | R01_cb6365_c0/f5p2/1956     | NA                          | NA                          |
| R01_cb6328_c4/flp0/698      | NA                       | R01_cb6328_c4/flp0/698      | R01_cb6328_c4/flp0/698      | R01_cb6328_c4/flp0/698      |
| R01_cb8564_c117203/flp0/288 | NA                       | R01_cb8564_c117203/flp0/288 | R01_cb8564_c117203/flp0/288 | R01_cb8564_c117203/flp0/288 |
| 5                           |                          | 5                           | 5                           | 5                           |
| R01_cb8049_c20/flp0/847     | NA                       | R01_cb8049_c20/flp0/847     | NA                          | NA                          |
| R01_cb8564_c69830/flp0/2648 | NA                       | R01_cb8564_c69830/flp0/2648 | NA                          | NA                          |
| R01_cb3359_c30/flp0/2249    | NA                       | R01_cb3359_c30/flp0/2249    | NA                          | R01_cb3359_c30/flp0/2249    |
| R01_cb8564_c126440/flp0/260 | NA                       | R01_cb8564_c126440/flp0/260 | R01_cb8564_c126440/flp0/260 | R01_cb8564_c126440/flp0/260 |
| 0                           |                          | 0                           | 0                           | 0                           |
| R01_cb18556_c0/flp0/974     | NA                       | NA                          | NA                          | R01_cb18556_c0/flp0/974     |
| R01_cb2719_c70/flp0/672     | R01_cb2719_c70/flp0/672  | R01_cb2719_c70/flp0/672     | R01_cb2719_c70/flp0/672     | R01_cb2719_c70/flp0/672     |
| R01_cb8564_c42343/flp2/2933 | NA                       | R01_cb8564_c42343/flp2/2933 | NA                          | NA                          |
| R01_cb16013_c0/flp0/1384    | NA                       | R01_cb16013_c0/flp0/1384    | NA                          | NA                          |
| R01_cb15188_c0/flp0/1551    | R01_cb15188_c0/flp0/1551 | R01_cb15188_c0/flp0/1551    | NA                          | R01_cb15188_c0/flp0/1551    |
| R01_cb11690_c1/flp0/2286    | NA                       | NA                          | R01_cb11690_c1/flp0/2286    | NA                          |
| R01_cb13392_c26/flp3/960    | NA                       | R01_cb13392_c26/flp3/960    | NA                          | NA                          |
| R01_cb2344_c1/flp0/4165     | R01_cb2344_c1/flp0/4165  | R01_cb2344_c1/flp0/4165     | NA                          | NA                          |
| R01_cb5255_c6/flp0/2876     | NA                       | R01_cb5255_c6/flp0/2876     | R01_cb5255_c6/flp0/2876     | R01_cb5255_c6/flp0/2876     |
| R01_cb3750_c30/flp0/2586    | NA                       | NA                          | NA                          | R01_cb3750_c30/flp0/2586    |
| R01_cb15443_c2/flp0/1227    | NA                       | NA                          | NA                          | R01_cb15443_c2/flp0/1227    |
| R01_cb10034_c32/flp0/595    | NA                       | R01_cb10034_c32/flp0/595    | NA                          | NA                          |
| R01_cb13386_c11/flp0/1430   | NA                       | R01_cb13386_c11/flp0/1430   | NA                          | NA                          |
| R01_cb16867_c0/flp0/1340    | NA                       | NA                          | NA                          | R01_cb16867_c0/flp0/1340    |
| R01_cb363_c5/flp0/2564      | NA                       | R01_cb363_c5/flp0/2564      | NA                          | R01_cb363_c5/flp0/2564      |
| R01_cb8564_c12442/flp0/2779 | NA                       | R01_cb8564_c12442/flp0/2779 | R01_cb8564_c12442/flp0/2779 | R01_cb8564_c12442/flp0/2779 |

|                              |                             |                              |                             |                              |
|------------------------------|-----------------------------|------------------------------|-----------------------------|------------------------------|
| R01_cb18409_c3/f2p0/428      | R01_cb18409_c3/f2p0/428     | R01_cb18409_c3/f2p0/428      | R01_cb18409_c3/f2p0/428     | R01_cb18409_c3/f2p0/428      |
| R01_cb8564_c46990/f1p0/4414  | NA                          | NA                           | NA                          | R01_cb8564_c46990/f1p0/4414  |
| R01_cb4795_c3/f1p0/1980      | NA                          | R01_cb4795_c3/f1p0/1980      | NA                          | NA                           |
| R01_cb8564_c51855/f1p0/2961  | NA                          | NA                           | R01_cb8564_c51855/f1p0/2961 | NA                           |
| R01_cb1522_c0/f1p0/4289      | NA                          | R01_cb1522_c0/f1p0/4289      | NA                          | NA                           |
| R01_cb13583_c9/f2p0/1172     | NA                          | NA                           | NA                          | R01_cb13583_c9/f2p0/1172     |
| R01_cb3309_c8/f1p0/1954      | NA                          | R01_cb3309_c8/f1p0/1954      | NA                          | NA                           |
| R01_cb10970_c7/f1p0/1091     | NA                          | NA                           | NA                          | R01_cb10970_c7/f1p0/1091     |
| R01_cb18456_c2292/f1p0/693   | NA                          | R01_cb18456_c2292/f1p0/693   | R01_cb18456_c2292/f1p0/693  | R01_cb18456_c2292/f1p0/693   |
| R01_cb8564_c49390/f1p0/2842  | R01_cb8564_c49390/f1p0/2842 | R01_cb8564_c49390/f1p0/2842  | R01_cb8564_c49390/f1p0/2842 | R01_cb8564_c49390/f1p0/2842  |
| R01_cb8564_c116364/f1p0/1895 | NA                          | NA                           | NA                          | R01_cb8564_c116364/f1p0/1895 |
| R01_cb8564_c91973/f1p0/2452  | R01_cb8564_c91973/f1p0/2452 | R01_cb8564_c91973/f1p0/2452  | NA                          | NA                           |
| R01_cb8564_c51888/f1p0/2833  | NA                          | R01_cb8564_c51888/f1p0/2833  | NA                          | R01_cb8564_c51888/f1p0/2833  |
| R01_cb18409_c103/f1p0/442    | R01_cb18409_c103/f1p0/442   | R01_cb18409_c103/f1p0/442    | R01_cb18409_c103/f1p0/442   | R01_cb18409_c103/f1p0/442    |
| R01_cb8564_c751/f2p0/2625    | NA                          | R01_cb8564_c751/f2p0/2625    | NA                          | NA                           |
| R01_cb8564_c5246/f1p0/2196   | NA                          | R01_cb8564_c5246/f1p0/2196   | NA                          | NA                           |
| R01_cb18287_c8/f1p0/449      | R01_cb18287_c8/f1p0/449     | R01_cb18287_c8/f1p0/449      | R01_cb18287_c8/f1p0/449     | R01_cb18287_c8/f1p0/449      |
| R01_cb1745_c2/f1p0/3206      | NA                          | R01_cb1745_c2/f1p0/3206      | NA                          | NA                           |
| R01_cb9347_c7/f1p0/1792      | NA                          | R01_cb9347_c7/f1p0/1792      | NA                          | NA                           |
| R01_cb8564_c148946/f1p1/3399 | NA                          | R01_cb8564_c148946/f1p1/3399 | NA                          | NA                           |
| R01_cb4529_c10/f1p0/746      | NA                          | R01_cb4529_c10/f1p0/746      | NA                          | NA                           |
| R01_cb1892_c4/f1p0/3473      | R01_cb1892_c4/f1p0/3473     | R01_cb1892_c4/f1p0/3473      | NA                          | R01_cb1892_c4/f1p0/3473      |

|                              |                             |                              |                              |                          |
|------------------------------|-----------------------------|------------------------------|------------------------------|--------------------------|
| R01_cb8564_c91980/flp0/1973  | R01_cb8564_c91980/flp0/1973 | NA                           | NA                           | NA                       |
| R01_cb4455_c19/flp0/876      | R01_cb4455_c19/flp0/876     | R01_cb4455_c19/flp0/876      | NA                           | R01_cb4455_c19/flp0/876  |
| R01_cb4533_c1/flp0/3594      | NA                          | R01_cb4533_c1/flp0/3594      | NA                           | R01_cb4533_c1/flp0/3594  |
| R01_cb10812_c1/flp0/2522     | NA                          | R01_cb10812_c1/flp0/2522     | NA                           | R01_cb10812_c1/flp0/2522 |
| R01_cb13877_c3/flp0/1270     | NA                          | NA                           | NA                           | R01_cb13877_c3/flp0/1270 |
| R01_cb8414_c3/flp0/1459      | NA                          | NA                           | NA                           | R01_cb8414_c3/flp0/1459  |
| R01_cb16981_c13/flp1/600     | NA                          | NA                           | NA                           | R01_cb16981_c13/flp1/600 |
| R01_cb13199_c2/flp0/1799     | NA                          | NA                           | NA                           | R01_cb13199_c2/flp0/1799 |
| R01_cb13802_c2/flp0/682      | NA                          | NA                           | R01_cb13802_c2/flp0/682      | R01_cb13802_c2/flp0/682  |
| R01_cb7687_c8/f8p0/2464      | NA                          | NA                           | NA                           | R01_cb7687_c8/f8p0/2464  |
| R01_cb18406_c1/flp0/703      | NA                          | R01_cb18406_c1/flp0/703      | R01_cb18406_c1/flp0/703      | R01_cb18406_c1/flp0/703  |
| R01_cb8564_c112307/flp0/2255 | NA                          | R01_cb8564_c112307/flp0/2255 | R01_cb8564_c112307/flp0/2255 | NA                       |
| R01_cb11766_c1/flp0/2462     | NA                          | NA                           | R01_cb11766_c1/flp0/2462     | NA                       |
| R01_cb10415_c0/f3p0/1058     | NA                          | R01_cb10415_c0/f3p0/1058     | NA                           | NA                       |
| R01_cb18191_c2/flp0/1455     | NA                          | NA                           | NA                           | R01_cb18191_c2/flp0/1455 |
| R01_cb5110_c2/flp0/1943      | NA                          | R01_cb5110_c2/flp0/1943      | NA                           | NA                       |
| R01_cb13287_c6/flp1/632      | R01_cb13287_c6/flp1/632     | R01_cb13287_c6/flp1/632      | NA                           | R01_cb13287_c6/flp1/632  |
| R01_cb17522_c0/flp0/1119     | NA                          | NA                           | NA                           | R01_cb17522_c0/flp0/1119 |
| R01_cb2382_c0/f4p1/5337      | NA                          | NA                           | NA                           | R01_cb2382_c0/f4p1/5337  |
| R01_cb6615_c7/flp0/2918      | NA                          | NA                           | R01_cb6615_c7/flp0/2918      | R01_cb6615_c7/flp0/2918  |
| R01_cb699_c0/flp0/4676       | NA                          | NA                           | NA                           | R01_cb699_c0/flp0/4676   |
| R01_cb11825_c0/flp0/615      | R01_cb11825_c0/flp0/615     | R01_cb11825_c0/flp0/615      | R01_cb11825_c0/flp0/615      | R01_cb11825_c0/flp0/615  |
| R01_cb17485_c0/flp0/927      | NA                          | NA                           | NA                           | R01_cb17485_c0/flp0/927  |
| R01_cb8564_c126966/flp5/272  | R01_cb8564_c126966/flp5/272 | R01_cb8564_c126966/flp5/272  | NA                           | NA                       |



|                              |                          |                             |                          |                              |
|------------------------------|--------------------------|-----------------------------|--------------------------|------------------------------|
| 0                            | 20                       | 0                           |                          |                              |
| R01_cb8564_c74355/flp1/2682  | NA                       | R01_cb8564_c74355/flp1/2682 | NA                       | NA                           |
| R01_cb12811_c8/flp0/686      | NA                       | R01_cb12811_c8/flp0/686     | NA                       | R01_cb12811_c8/flp0/686      |
| R01_cb15237_c4/flp0/5009     | NA                       | R01_cb15237_c4/flp0/5009    | NA                       | NA                           |
| R01_cb17760_c3/flp0/1801     | NA                       | NA                          | NA                       | R01_cb17760_c3/flp0/1801     |
| R01_cb9750_c6/flp0/1895      | NA                       | NA                          | NA                       | R01_cb9750_c6/flp0/1895      |
| R01_cb16338_c2/flp0/856      | NA                       | R01_cb16338_c2/flp0/856     | NA                       | R01_cb16338_c2/flp0/856      |
| R01_cb2991_c20/flp0/1382     | NA                       | NA                          | NA                       | R01_cb2991_c20/flp0/1382     |
| R01_cb10913_c7/flp0/1183     | NA                       | R01_cb10913_c7/flp0/1183    | NA                       | R01_cb10913_c7/flp0/1183     |
| R01_cb9236_c0/flp1/2144      | NA                       | NA                          | NA                       | R01_cb9236_c0/flp1/2144      |
| R01_cb422_c5/flp0/3346       | NA                       | NA                          | NA                       | R01_cb422_c5/flp0/3346       |
| R01_cb8564_c43401/flp2/3025  | NA                       | R01_cb8564_c43401/flp2/3025 | NA                       | NA                           |
| R01_cb5287_c2/flp0/2768      | NA                       | R01_cb5287_c2/flp0/2768     | NA                       | NA                           |
| R01_cb6758_c1/f3p0/1900      | NA                       | NA                          | NA                       | R01_cb6758_c1/f3p0/1900      |
| R01_cb8564_c24565/flp0/3307  | NA                       | R01_cb8564_c24565/flp0/3307 | NA                       | R01_cb8564_c24565/flp0/3307  |
| R01_cb16210_c3/flp0/904      | NA                       | NA                          | NA                       | R01_cb16210_c3/flp0/904      |
| R01_cb17068_c1/flp0/1570     | R01_cb17068_c1/flp0/1570 | R01_cb17068_c1/flp0/1570    | R01_cb17068_c1/flp0/1570 | R01_cb17068_c1/flp0/1570     |
| R01_cb8564_c112134/flp0/2518 | NA                       | NA                          | NA                       | R01_cb8564_c112134/flp0/2518 |
| R01_cb17644_c2/flp0/386      | NA                       | NA                          | NA                       | R01_cb17644_c2/flp0/386      |
| R01_cb12504_c2/flp0/1579     | NA                       | R01_cb12504_c2/flp0/1579    | NA                       | R01_cb12504_c2/flp0/1579     |
| R01_cb5246_c7/flp0/753       | R01_cb5246_c7/flp0/753   | R01_cb5246_c7/flp0/753      | R01_cb5246_c7/flp0/753   | R01_cb5246_c7/flp0/753       |
| R01_cb13026_c2/f2p0/1558     | NA                       | R01_cb13026_c2/f2p0/1558    | R01_cb13026_c2/f2p0/1558 | R01_cb13026_c2/f2p0/1558     |
| R01_cb4886_c2/flp0/1930      | NA                       | R01_cb4886_c2/flp0/1930     | NA                       | NA                           |
| R01_cb7023_c6/flp0/1630      | NA                       | R01_cb7023_c6/flp0/1630     | R01_cb7023_c6/flp0/1630  | R01_cb7023_c6/flp0/1630      |
| R01_cb12722_c30/f67p3/1580   | NA                       | NA                          | NA                       | R01_cb12722_c30/f67p3/1580   |

|                             |                          |                             |                          |                           |
|-----------------------------|--------------------------|-----------------------------|--------------------------|---------------------------|
| R01_cb12998_c4/flp0/1068    | R01_cb12998_c4/flp0/1068 | R01_cb12998_c4/flp0/1068    | R01_cb12998_c4/flp0/1068 | R01_cb12998_c4/flp0/1068  |
| R01_cb9704_c3/flp0/1002     | NA                       | NA                          | NA                       | R01_cb9704_c3/flp0/1002   |
| R01_cb11026_c7/flp0/698     | R01_cb11026_c7/flp0/698  | R01_cb11026_c7/flp0/698     | R01_cb11026_c7/flp0/698  | R01_cb11026_c7/flp0/698   |
| R01_cb18456_c7557/flp1/1605 | NA                       | R01_cb18456_c7557/flp1/1605 | NA                       | NA                        |
| R01_cb8736_c5/flp0/1859     | NA                       | R01_cb8736_c5/flp0/1859     | NA                       | NA                        |
| R01_cb15540_c2/f2p2/1499    | NA                       | NA                          | NA                       | R01_cb15540_c2/f2p2/1499  |
| R01_cb3539_c3/flp0/3596     | NA                       | R01_cb3539_c3/flp0/3596     | NA                       | NA                        |
| R01_cb636_c7/flp0/1833      | NA                       | NA                          | NA                       | R01_cb636_c7/flp0/1833    |
| R01_cb7358_c3/flp0/2425     | NA                       | R01_cb7358_c3/flp0/2425     | NA                       | R01_cb7358_c3/flp0/2425   |
| R01_cb13435_c12/flp0/1852   | NA                       | NA                          | NA                       | R01_cb13435_c12/flp0/1852 |
| R01_cb13133_c4/flp0/1181    | R01_cb13133_c4/flp0/1181 | R01_cb13133_c4/flp0/1181    | R01_cb13133_c4/flp0/1181 | R01_cb13133_c4/flp0/1181  |
| R01_cb3045_c6/flp0/2444     | NA                       | R01_cb3045_c6/flp0/2444     | NA                       | NA                        |
| R01_cb4294_c24/flp0/2507    | R01_cb4294_c24/flp0/2507 | R01_cb4294_c24/flp0/2507    | NA                       | NA                        |
| R01_cb17_c6/flp0/5004       | NA                       | NA                          | NA                       | R01_cb17_c6/flp0/5004     |
| R01_cb14125_c54/flp0/628    | NA                       | R01_cb14125_c54/flp0/628    | R01_cb14125_c54/flp0/628 | NA                        |
| R01_cb7836_c0/flp0/2522     | NA                       | NA                          | NA                       | R01_cb7836_c0/flp0/2522   |
| R01_cb7419_c14/f3p1/2624    | NA                       | NA                          | NA                       | R01_cb7419_c14/f3p1/2624  |
| R01_cb15294_c2/flp0/1595    | R01_cb15294_c2/flp0/1595 | R01_cb15294_c2/flp0/1595    | R01_cb15294_c2/flp0/1595 | R01_cb15294_c2/flp0/1595  |
| R01_cb2334_c2/flp0/3969     | NA                       | R01_cb2334_c2/flp0/3969     | NA                       | NA                        |
| R01_cb11257_c1/flp0/786     | NA                       | NA                          | NA                       | R01_cb11257_c1/flp0/786   |
| R01_cb8564_c77387/flp0/4197 | NA                       | R01_cb8564_c77387/flp0/4197 | NA                       | NA                        |
| R01_cb15379_c2/flp0/1238    | R01_cb15379_c2/flp0/1238 | R01_cb15379_c2/flp0/1238    | R01_cb15379_c2/flp0/1238 | R01_cb15379_c2/flp0/1238  |
| R01_cb2387_c5/flp0/2939     | NA                       | R01_cb2387_c5/flp0/2939     | NA                       | R01_cb2387_c5/flp0/2939   |
| R01_cb11277_c1/flp1/1966    | NA                       | R01_cb11277_c1/flp1/1966    | NA                       | NA                        |
| R01_cb16653_c3/flp0/1725    | NA                       | NA                          | NA                       | R01_cb16653_c3/flp0/1725  |
| R01_cb8564_c88491/flp0/2512 | NA                       | R01_cb8564_c88491/flp0/2512 | NA                       | NA                        |

|                              |                             |                              |                              |                              |
|------------------------------|-----------------------------|------------------------------|------------------------------|------------------------------|
| R01_cb2822_c1/f2p0/2694      | NA                          | R01_cb2822_c1/f2p0/2694      | NA                           | NA                           |
| R01_cb2573_c1/f1p0/3879      | NA                          | NA                           | R01_cb2573_c1/f1p0/3879      | NA                           |
| R01_cb18456_c7621/f1p0/1467  | NA                          | R01_cb18456_c7621/f1p0/1467  | NA                           | R01_cb18456_c7621/f1p0/1467  |
| R01_cb8564_c12365/f1p0/3798  | R01_cb8564_c12365/f1p0/3798 | NA                           | NA                           | NA                           |
| R01_cb16682_c9/f1p0/847      | R01_cb16682_c9/f1p0/847     | R01_cb16682_c9/f1p0/847      | R01_cb16682_c9/f1p0/847      | R01_cb16682_c9/f1p0/847      |
| R01_cb8564_c129160/f1p0/2693 | NA                          | R01_cb8564_c129160/f1p0/2693 | NA                           | R01_cb8564_c129160/f1p0/2693 |
| R01_cb16321_c1/f1p0/1314     | NA                          | R01_cb16321_c1/f1p0/1314     | NA                           | R01_cb16321_c1/f1p0/1314     |
| R01_cb15873_c1/f2p0/1546     | R01_cb15873_c1/f2p0/1546    | R01_cb15873_c1/f2p0/1546     | NA                           | NA                           |
| R01_cb1012_c18/f1p0/1719     | NA                          | R01_cb1012_c18/f1p0/1719     | NA                           | NA                           |
| R01_cb11411_c1/f1p0/1885     | NA                          | R01_cb11411_c1/f1p0/1885     | R01_cb11411_c1/f1p0/1885     | R01_cb11411_c1/f1p0/1885     |
| R01_cb13857_c1/f1p0/1030     | NA                          | NA                           | NA                           | R01_cb13857_c1/f1p0/1030     |
| R01_cb14344_c6/f1p0/1326     | NA                          | R01_cb14344_c6/f1p0/1326     | R01_cb14344_c6/f1p0/1326     | R01_cb14344_c6/f1p0/1326     |
| R01_cb18456_c7181/f1p0/1377  | R01_cb18456_c7181/f1p0/1377 | R01_cb18456_c7181/f1p0/1377  | R01_cb18456_c7181/f1p0/1377  | R01_cb18456_c7181/f1p0/1377  |
| R01_cb9214_c6/f2p0/1064      | NA                          | R01_cb9214_c6/f2p0/1064      | NA                           | NA                           |
| R01_cb14599_c0/f2p0/1471     | R01_cb14599_c0/f2p0/1471    | NA                           | NA                           | R01_cb14599_c0/f2p0/1471     |
| R01_cb9154_c3/f1p0/2170      | NA                          | R01_cb9154_c3/f1p0/2170      | NA                           | R01_cb9154_c3/f1p0/2170      |
| R01_cb8564_c125216/f1p0/2375 | NA                          | R01_cb8564_c125216/f1p0/2375 | R01_cb8564_c125216/f1p0/2375 | R01_cb8564_c125216/f1p0/2375 |
| R01_cb16082_c5/f1p0/691      | NA                          | NA                           | NA                           | R01_cb16082_c5/f1p0/691      |
| R01_cb13867_c15/f10p2/797    | NA                          | NA                           | NA                           | R01_cb13867_c15/f10p2/797    |
| R01_cb8564_c15085/f1p0/2489  | NA                          | R01_cb8564_c15085/f1p0/2489  | NA                           | R01_cb8564_c15085/f1p0/2489  |
| R01_cb8564_c71769/f1p0/1908  | NA                          | NA                           | R01_cb8564_c71769/f1p0/1908  | R01_cb8564_c71769/f1p0/1908  |
| R01_cb14883_c2/f1p0/1543     | NA                          | R01_cb14883_c2/f1p0/1543     | NA                           | NA                           |

|                             |                            |                             |                             |                             |
|-----------------------------|----------------------------|-----------------------------|-----------------------------|-----------------------------|
| R01_cb8023_c10/flp0/2224    | NA                         | NA                          | R01_cb8023_c10/flp0/2224    | R01_cb8023_c10/flp0/2224    |
| R01_cb3218_c1/flp0/3683     | NA                         | NA                          | NA                          | R01_cb3218_c1/flp0/3683     |
| R01_cb2383_c12/flp1/2020    | NA                         | R01_cb2383_c12/flp1/2020    | NA                          | NA                          |
| R01_cb18456_c7209/flp0/640  | R01_cb18456_c7209/flp0/640 | R01_cb18456_c7209/flp0/640  | R01_cb18456_c7209/flp0/640  | R01_cb18456_c7209/flp0/640  |
| R01_cb6873_c0/flp0/2745     | NA                         | R01_cb6873_c0/flp0/2745     | NA                          | NA                          |
| R01_cb9359_c4/flp0/1039     | NA                         | NA                          | NA                          | R01_cb9359_c4/flp0/1039     |
| R01_cb2031_c1/flp2/4205     | NA                         | NA                          | NA                          | R01_cb2031_c1/flp2/4205     |
| R01_cb18456_c6805/flp0/438  | R01_cb18456_c6805/flp0/438 | R01_cb18456_c6805/flp0/438  | R01_cb18456_c6805/flp0/438  | NA                          |
| R01_cb18584_c1/flp1/1646    | NA                         | NA                          | NA                          | R01_cb18584_c1/flp1/1646    |
| R01_cb11449_c1/flp0/2586    | NA                         | R01_cb11449_c1/flp0/2586    | NA                          | NA                          |
| R01_cb17126_c0/f2p0/1021    | NA                         | NA                          | NA                          | R01_cb17126_c0/f2p0/1021    |
| R01_cb4952_c7/flp0/1045     | NA                         | NA                          | NA                          | R01_cb4952_c7/flp0/1045     |
| R01_cb12827_c2/flp0/1364    | NA                         | NA                          | NA                          | R01_cb12827_c2/flp0/1364    |
| R01_cb8564_c86327/flp1/3488 | NA                         | NA                          | NA                          | R01_cb8564_c86327/flp1/3488 |
| R01_cb3303_c2/flp0/3381     | NA                         | R01_cb3303_c2/flp0/3381     | R01_cb3303_c2/flp0/3381     | R01_cb3303_c2/flp0/3381     |
| R01_cb5120_c1/flp0/2655     | NA                         | NA                          | NA                          | R01_cb5120_c1/flp0/2655     |
| R01_cb7497_c4/f2p0/2558     | NA                         | NA                          | NA                          | R01_cb7497_c4/f2p0/2558     |
| R01_cb10610_c1/flp0/1938    | NA                         | NA                          | NA                          | R01_cb10610_c1/flp0/1938    |
| R01_cb5183_c115/flp0/1016   | NA                         | NA                          | NA                          | R01_cb5183_c115/flp0/1016   |
| R01_cb18456_c7373/flp0/1529 | NA                         | R01_cb18456_c7373/flp0/1529 | R01_cb18456_c7373/flp0/1529 | R01_cb18456_c7373/flp0/1529 |
| R01_cb16946_c1/flp0/896     | NA                         | NA                          | NA                          | R01_cb16946_c1/flp0/896     |
| R01_cb242_c22/flp0/3715     | NA                         | NA                          | NA                          | R01_cb242_c22/flp0/3715     |
| R01_cb10192_c8/flp0/1407    | NA                         | NA                          | NA                          | R01_cb10192_c8/flp0/1407    |
| R01_cb8564_c71951/flp0/2329 | NA                         | R01_cb8564_c71951/flp0/2329 | NA                          | NA                          |
| R01_cb17973_c58/flp0/1273   | NA                         | R01_cb17973_c58/flp0/1273   | R01_cb17973_c58/flp0/1273   | R01_cb17973_c58/flp0/1273   |
| R01_cb16326_c0/f3p1/734     | NA                         | R01_cb16326_c0/f3p1/734     | R01_cb16326_c0/f3p1/734     | R01_cb16326_c0/f3p1/734     |

|                              |                          |                              |                          |                             |
|------------------------------|--------------------------|------------------------------|--------------------------|-----------------------------|
| R01_cb14977_c5/flp0/1742     | R01_cb14977_c5/flp0/1742 | R01_cb14977_c5/flp0/1742     | R01_cb14977_c5/flp0/1742 | R01_cb14977_c5/flp0/1742    |
| R01_cb8564_c118521/flp0/2064 | NA                       | R01_cb8564_c118521/flp0/2064 | NA                       | NA                          |
| R01_cb1391_c1/flp0/3632      | R01_cb1391_c1/flp0/3632  | R01_cb1391_c1/flp0/3632      | NA                       | NA                          |
| R01_cb155_c12/flp0/2278      | NA                       | R01_cb155_c12/flp0/2278      | NA                       | R01_cb155_c12/flp0/2278     |
| R01_cb7356_c7/flp0/1722      | NA                       | NA                           | NA                       | R01_cb7356_c7/flp0/1722     |
| R01_cb16164_c0/flp0/636      | NA                       | R01_cb16164_c0/flp0/636      | NA                       | NA                          |
| R01_cb3645_c45/flp0/397      | R01_cb3645_c45/flp0/397  | R01_cb3645_c45/flp0/397      | R01_cb3645_c45/flp0/397  | R01_cb3645_c45/flp0/397     |
| R01_cb13089_c1/flp0/1745     | NA                       | R01_cb13089_c1/flp0/1745     | NA                       | NA                          |
| R01_cb8564_c77498/flp0/3030  | NA                       | NA                           | NA                       | R01_cb8564_c77498/flp0/3030 |
| R01_cb191_c7/flp1/4776       | NA                       | NA                           | NA                       | R01_cb191_c7/flp1/4776      |
| R01_cb16594_c0/f2p1/1216     | NA                       | NA                           | NA                       | R01_cb16594_c0/f2p1/1216    |
| R01_cb16042_c1/flp0/1336     | NA                       | R01_cb16042_c1/flp0/1336     | NA                       | R01_cb16042_c1/flp0/1336    |
| R01_cb8564_c1325/flp1/2589   | NA                       | NA                           | NA                       | R01_cb8564_c1325/flp1/2589  |
| R01_cb9871_c4/flp0/704       | NA                       | R01_cb9871_c4/flp0/704       | NA                       | NA                          |
| R01_cb1203_c2/flp2/4432      | NA                       | NA                           | NA                       | R01_cb1203_c2/flp2/4432     |
| R01_cb2710_c2/flp0/2584      | NA                       | NA                           | NA                       | R01_cb2710_c2/flp0/2584     |
| R01_cb2991_c4/flp0/3750      | NA                       | NA                           | NA                       | R01_cb2991_c4/flp0/3750     |
| R01_cb8564_c84717/flp0/2742  | NA                       | R01_cb8564_c84717/flp0/2742  | NA                       | NA                          |
| R01_cb4295_c15/flp0/2702     | R01_cb4295_c15/flp0/2702 | R01_cb4295_c15/flp0/2702     | R01_cb4295_c15/flp0/2702 | R01_cb4295_c15/flp0/2702    |
| R01_cb14873_c4/flp0/5015     | NA                       | R01_cb14873_c4/flp0/5015     | NA                       | NA                          |
| R01_cb3426_c8/flp0/1904      | NA                       | NA                           | NA                       | R01_cb3426_c8/flp0/1904     |
| R01_cb12023_c4/flp0/726      | NA                       | NA                           | NA                       | R01_cb12023_c4/flp0/726     |
| R01_cb2707_c29/flp1/3207     | NA                       | R01_cb2707_c29/flp1/3207     | NA                       | NA                          |
| R01_cb7741_c8/flp0/573       | R01_cb7741_c8/flp0/573   | R01_cb7741_c8/flp0/573       | R01_cb7741_c8/flp0/573   | R01_cb7741_c8/flp0/573      |
| R01_cb5858_c6/flp0/2783      | NA                       | R01_cb5858_c6/flp0/2783      | NA                       | NA                          |

|                              |                             |                             |                              |                              |
|------------------------------|-----------------------------|-----------------------------|------------------------------|------------------------------|
| R01_cb11652_c0/flp0/852      | NA                          | R01_cb11652_c0/flp0/852     | NA                           | NA                           |
| R01_cb7778_c0/flp1/2538      | R01_cb7778_c0/flp1/2538     | R01_cb7778_c0/flp1/2538     | R01_cb7778_c0/flp1/2538      | R01_cb7778_c0/flp1/2538      |
| R01_cb15564_c4/flp0/996      | R01_cb15564_c4/flp0/996     | R01_cb15564_c4/flp0/996     | R01_cb15564_c4/flp0/996      | R01_cb15564_c4/flp0/996      |
| R01_cb2543_c52/flp0/571      | R01_cb2543_c52/flp0/571     | R01_cb2543_c52/flp0/571     | NA                           | NA                           |
| R01_cb1203_c20/flp0/2906     | NA                          | NA                          | NA                           | R01_cb1203_c20/flp0/2906     |
| R01_cb2131_c2/flp0/4025      | NA                          | R01_cb2131_c2/flp0/4025     | NA                           | NA                           |
| R01_cb8564_c87105/flp0/4959  | NA                          | R01_cb8564_c87105/flp0/4959 | NA                           | NA                           |
| R01_cb9451_c0/flp0/1946      | NA                          | NA                          | NA                           | R01_cb9451_c0/flp0/1946      |
| R01_cb5246_c3/flp0/1919      | NA                          | R01_cb5246_c3/flp0/1919     | R01_cb5246_c3/flp0/1919      | R01_cb5246_c3/flp0/1919      |
| R01_cb822_c19/flp2/4163      | NA                          | NA                          | NA                           | R01_cb822_c19/flp2/4163      |
| R01_cb8564_c16608/flp0/2865  | R01_cb8564_c16608/flp0/2865 | R01_cb8564_c16608/flp0/2865 | R01_cb8564_c16608/flp0/2865  | R01_cb8564_c16608/flp0/2865  |
| R01_cb1729_c20/flp4/3827     | NA                          | NA                          | NA                           | R01_cb1729_c20/flp4/3827     |
| R01_cb18456_c7631/flp0/409   | NA                          | R01_cb18456_c7631/flp0/409  | NA                           | R01_cb18456_c7631/flp0/409   |
| R01_cb1377_c3/flp0/1881      | NA                          | NA                          | NA                           | R01_cb1377_c3/flp0/1881      |
| R01_cb2845_c5/flp0/3797      | NA                          | NA                          | NA                           | R01_cb2845_c5/flp0/3797      |
| R01_cb16442_c2/flp0/474      | R01_cb16442_c2/flp0/474     | R01_cb16442_c2/flp0/474     | R01_cb16442_c2/flp0/474      | R01_cb16442_c2/flp0/474      |
| R01_cb8564_c1007/flp0/1898   | R01_cb8564_c1007/flp0/1898  | R01_cb8564_c1007/flp0/1898  | R01_cb8564_c1007/flp0/1898   | R01_cb8564_c1007/flp0/1898   |
| R01_cb8564_c110727/flp0/2990 | NA                          | NA                          | R01_cb8564_c110727/flp0/2990 | R01_cb8564_c110727/flp0/2990 |
| R01_cb8564_c88002/f2p0/3341  | NA                          | R01_cb8564_c88002/f2p0/3341 | R01_cb8564_c88002/f2p0/3341  | R01_cb8564_c88002/f2p0/3341  |
| R01_cb8564_c70867/f9p1/2542  | NA                          | NA                          | NA                           | R01_cb8564_c70867/f9p1/2542  |
| R01_cb17091_c3/flp0/671      | R01_cb17091_c3/flp0/671     | R01_cb17091_c3/flp0/671     | R01_cb17091_c3/flp0/671      | R01_cb17091_c3/flp0/671      |
| R01_cb18456_c6434/flp0/489   | R01_cb18456_c6434/flp0/489  | R01_cb18456_c6434/flp0/489  | R01_cb18456_c6434/flp0/489   | R01_cb18456_c6434/flp0/489   |
| R01_cb8564_c5268/flp0/3194   | NA                          | R01_cb8564_c5268/flp0/3194  | NA                           | NA                           |
| R01_cb9903_c4/flp0/1776      | NA                          | R01_cb9903_c4/flp0/1776     | NA                           | NA                           |

|                              |                            |                              |                             |                              |
|------------------------------|----------------------------|------------------------------|-----------------------------|------------------------------|
| R01_cb14886_c0/f3p0/703      | NA                         | NA                           | R01_cb14886_c0/f3p0/703     | NA                           |
| R01_cb4585_c0/f2p0/2163      | NA                         | NA                           | NA                          | R01_cb4585_c0/f2p0/2163      |
| R01_cb16095_c1/f1p0/559      | R01_cb16095_c1/f1p0/559    | R01_cb16095_c1/f1p0/559      | R01_cb16095_c1/f1p0/559     | R01_cb16095_c1/f1p0/559      |
| R01_cb13545_c64/f1p0/1791    | R01_cb13545_c64/f1p0/1791  | R01_cb13545_c64/f1p0/1791    | NA                          | R01_cb13545_c64/f1p0/1791    |
| R01_cb8564_c124715/f1p0/2015 | NA                         | NA                           | NA                          | R01_cb8564_c124715/f1p0/2015 |
| R01_cb8564_c10630/f1p2/2801  | NA                         | NA                           | NA                          | R01_cb8564_c10630/f1p2/2801  |
| R01_cb16396_c1/f1p0/1781     | NA                         | R01_cb16396_c1/f1p0/1781     | NA                          | NA                           |
| R01_cb5290_c33/f1p0/3137     | NA                         | NA                           | NA                          | R01_cb5290_c33/f1p0/3137     |
| R01_cb8564_c20976/f1p0/3927  | NA                         | R01_cb8564_c20976/f1p0/3927  | NA                          | R01_cb8564_c20976/f1p0/3927  |
| R01_cb17100_c1/f1p0/780      | NA                         | R01_cb17100_c1/f1p0/780      | NA                          | NA                           |
| R01_cb8564_c122868/f1p0/2629 | NA                         | R01_cb8564_c122868/f1p0/2629 | NA                          | NA                           |
| R01_cb15077_c4/f1p0/1256     | NA                         | NA                           | NA                          | R01_cb15077_c4/f1p0/1256     |
| R01_cb4822_c1/f1p0/2484      | R01_cb4822_c1/f1p0/2484    | R01_cb4822_c1/f1p0/2484      | R01_cb4822_c1/f1p0/2484     | R01_cb4822_c1/f1p0/2484      |
| R01_cb7754_c2/f1p0/640       | R01_cb7754_c2/f1p0/640     | R01_cb7754_c2/f1p0/640       | NA                          | R01_cb7754_c2/f1p0/640       |
| R01_cb8785_c1/f3p0/2272      | NA                         | NA                           | NA                          | R01_cb8785_c1/f3p0/2272      |
| R01_cb11004_c2/f1p0/1892     | NA                         | R01_cb11004_c2/f1p0/1892     | R01_cb11004_c2/f1p0/1892    | R01_cb11004_c2/f1p0/1892     |
| R01_cb10815_c7/f1p0/333      | R01_cb10815_c7/f1p0/333    | R01_cb10815_c7/f1p0/333      | R01_cb10815_c7/f1p0/333     | R01_cb10815_c7/f1p0/333      |
| R01_cb2893_c0/f3p0/3751      | NA                         | R01_cb2893_c0/f3p0/3751      | NA                          | R01_cb2893_c0/f3p0/3751      |
| R01_cb18798_c1/f1p1/6607     | NA                         | R01_cb18798_c1/f1p1/6607     | R01_cb18798_c1/f1p1/6607    | NA                           |
| R01_cb1860_c31/f1p0/2802     | NA                         | NA                           | NA                          | R01_cb1860_c31/f1p0/2802     |
| R01_cb8525_c1/f1p0/686       | NA                         | R01_cb8525_c1/f1p0/686       | NA                          | NA                           |
| R01_cb5783_c1/f1p0/2788      | NA                         | R01_cb5783_c1/f1p0/2788      | NA                          | NA                           |
| R01_cb8564_c20840/f1p3/2713  | NA                         | R01_cb8564_c20840/f1p3/2713  | R01_cb8564_c20840/f1p3/2713 | R01_cb8564_c20840/f1p3/2713  |
| R01_cb18456_c7436/f1p0/884   | R01_cb18456_c7436/f1p0/884 | R01_cb18456_c7436/f1p0/884   | R01_cb18456_c7436/f1p0/884  | R01_cb18456_c7436/f1p0/884   |

|                             |                             |                             |                             |                             |
|-----------------------------|-----------------------------|-----------------------------|-----------------------------|-----------------------------|
| R01_cb8564_c4900/f4p1/3332  | NA                          | NA                          | NA                          | R01_cb8564_c4900/f4p1/3332  |
| R01_cb12326_c2/f1p0/639     | NA                          | NA                          | NA                          | R01_cb12326_c2/f1p0/639     |
| R01_cb1146_c10/f1p0/4139    | NA                          | R01_cb1146_c10/f1p0/4139    | NA                          | NA                          |
| R01_cb2030_c5/f1p0/577      | NA                          | NA                          | NA                          | R01_cb2030_c5/f1p0/577      |
| R01_cb18765_c1/f1p0/1512    | R01_cb18765_c1/f1p0/1512    | R01_cb18765_c1/f1p0/1512    | NA                          | R01_cb18765_c1/f1p0/1512    |
| R01_cb8564_c14798/f1p0/3645 | R01_cb8564_c14798/f1p0/3645 | R01_cb8564_c14798/f1p0/3645 | NA                          | R01_cb8564_c14798/f1p0/3645 |
| R01_cb6819_c8/f3p0/5435     | NA                          | NA                          | NA                          | R01_cb6819_c8/f3p0/5435     |
| R01_cb4352_c15/f3p0/2438    | NA                          | NA                          | NA                          | R01_cb4352_c15/f3p0/2438    |
| R01_cb6272_c3/f3p2/2571     | NA                          | NA                          | NA                          | R01_cb6272_c3/f3p2/2571     |
| R01_cb7514_c1/f1p0/2863     | R01_cb7514_c1/f1p0/2863     | R01_cb7514_c1/f1p0/2863     | R01_cb7514_c1/f1p0/2863     | R01_cb7514_c1/f1p0/2863     |
| R01_cb4943_c1/f1p0/2633     | NA                          | R01_cb4943_c1/f1p0/2633     | R01_cb4943_c1/f1p0/2633     | NA                          |
| R01_cb11511_c1/f1p0/4636    | NA                          | R01_cb11511_c1/f1p0/4636    | NA                          | NA                          |
| R01_cb1001_c3/f1p0/3391     | NA                          | R01_cb1001_c3/f1p0/3391     | R01_cb1001_c3/f1p0/3391     | R01_cb1001_c3/f1p0/3391     |
| R01_cb12641_c29/f1p0/993    | NA                          | NA                          | NA                          | R01_cb12641_c29/f1p0/993    |
| R01_cb11470_c1/f1p0/2083    | NA                          | R01_cb11470_c1/f1p0/2083    | NA                          | R01_cb11470_c1/f1p0/2083    |
| R01_cb17191_c1/f1p0/1511    | NA                          | R01_cb17191_c1/f1p0/1511    | NA                          | NA                          |
| R01_cb13774_c0/f2p0/964     | NA                          | NA                          | NA                          | R01_cb13774_c0/f2p0/964     |
| R01_cb8564_c68612/f4p1/2746 | NA                          | R01_cb8564_c68612/f4p1/2746 | NA                          | NA                          |
| R01_cb14729_c6/f1p2/634     | NA                          | R01_cb14729_c6/f1p2/634     | NA                          | NA                          |
| R01_cb1178_c13/f1p0/2397    | NA                          | NA                          | NA                          | R01_cb1178_c13/f1p0/2397    |
| R01_cb5122_c14/f1p0/2441    | NA                          | NA                          | NA                          | R01_cb5122_c14/f1p0/2441    |
| R01_cb204_c0/f2p1/5152      | NA                          | NA                          | NA                          | R01_cb204_c0/f2p1/5152      |
| R01_cb8564_c80419/f1p0/2649 | NA                          | R01_cb8564_c80419/f1p0/2649 | NA                          | NA                          |
| R01_cb8564_c50317/f1p0/2438 | R01_cb8564_c50317/f1p0/2438 | R01_cb8564_c50317/f1p0/2438 | R01_cb8564_c50317/f1p0/2438 | R01_cb8564_c50317/f1p0/2438 |



|                              |                            |                             |                             |                              |
|------------------------------|----------------------------|-----------------------------|-----------------------------|------------------------------|
| R01_cb14502_c13/flp0/999     | R01_cb14502_c13/flp0/999   | R01_cb14502_c13/flp0/999    | NA                          | R01_cb14502_c13/flp0/999     |
| R01_cb8564_c1512/flp0/2347   | NA                         | R01_cb8564_c1512/flp0/2347  | NA                          | R01_cb8564_c1512/flp0/2347   |
| R01_cb2200_c4/flp1/1423      | NA                         | R01_cb2200_c4/flp1/1423     | R01_cb2200_c4/flp1/1423     | NA                           |
| R01_cb9612_c0/f5p0/1063      | NA                         | NA                          | NA                          | R01_cb9612_c0/f5p0/1063      |
| R01_cb7725_c5/flp0/2458      | NA                         | R01_cb7725_c5/flp0/2458     | NA                          | NA                           |
| R01_cb11425_c0/flp0/1855     | R01_cb11425_c0/flp0/1855   | R01_cb11425_c0/flp0/1855    | NA                          | R01_cb11425_c0/flp0/1855     |
| R01_cb18456_c7787/flp0/682   | NA                         | NA                          | NA                          | R01_cb18456_c7787/flp0/682   |
| R01_cb8564_c47398/flp0/2719  | NA                         | NA                          | NA                          | R01_cb8564_c47398/flp0/2719  |
| R01_cb13161_c14/flp0/1746    | NA                         | R01_cb13161_c14/flp0/1746   | NA                          | NA                           |
| R01_cb6861_c9/flp0/3465      | R01_cb6861_c9/flp0/3465    | R01_cb6861_c9/flp0/3465     | R01_cb6861_c9/flp0/3465     | R01_cb6861_c9/flp0/3465      |
| R01_cb2946_c5/flp0/2333      | NA                         | NA                          | NA                          | R01_cb2946_c5/flp0/2333      |
| R01_cb2506_c3/flp0/2099      | NA                         | R01_cb2506_c3/flp0/2099     | NA                          | NA                           |
| R01_cb7741_c12/flp0/457      | R01_cb7741_c12/flp0/457    | R01_cb7741_c12/flp0/457     | R01_cb7741_c12/flp0/457     | R01_cb7741_c12/flp0/457      |
| R01_cb8564_c146882/f3p8/4113 | NA                         | NA                          | NA                          | R01_cb8564_c146882/f3p8/4113 |
| R01_cb17786_c0/flp1/1235     | NA                         | R01_cb17786_c0/flp1/1235    | NA                          | NA                           |
| R01_cb8564_c88081/flp0/3233  | NA                         | R01_cb8564_c88081/flp0/3233 | R01_cb8564_c88081/flp0/3233 | R01_cb8564_c88081/flp0/3233  |
| R01_cb6845_c22/flp0/2629     | NA                         | NA                          | NA                          | R01_cb6845_c22/flp0/2629     |
| R01_cb5900_c135/flp0/2776    | NA                         | R01_cb5900_c135/flp0/2776   | NA                          | R01_cb5900_c135/flp0/2776    |
| R01_cb8564_c177306/flp0/2309 | NA                         | NA                          | NA                          | R01_cb8564_c177306/flp0/2309 |
| R01_cb8564_c24584/flp0/3255  | NA                         | R01_cb8564_c24584/flp0/3255 | NA                          | NA                           |
| R01_cb8564_c3507/flp0/2893   | R01_cb8564_c3507/flp0/2893 | R01_cb8564_c3507/flp0/2893  | NA                          | NA                           |
| R01_cb8564_c22600/flp0/3119  | NA                         | R01_cb8564_c22600/flp0/3119 | R01_cb8564_c22600/flp0/3119 | R01_cb8564_c22600/flp0/3119  |
| R01_cb17987_c1/flp0/1160     | NA                         | NA                          | NA                          | R01_cb17987_c1/flp0/1160     |
| R01_cb17052_c4/flp0/1874     | NA                         | NA                          | NA                          | R01_cb17052_c4/flp0/1874     |

|                              |                            |                              |                             |                              |
|------------------------------|----------------------------|------------------------------|-----------------------------|------------------------------|
| R01_cb17763_c0/f1p0/1176     | NA                         | NA                           | NA                          | R01_cb17763_c0/f1p0/1176     |
| R01_cb2238_c15/f1p0/3318     | NA                         | R01_cb2238_c15/f1p0/3318     | NA                          | NA                           |
| R01_cb8564_c112371/f1p0/2779 | NA                         | R01_cb8564_c112371/f1p0/2779 | NA                          | R01_cb8564_c112371/f1p0/2779 |
| R01_cb13872_c5/f1p0/1280     | R01_cb13872_c5/f1p0/1280   | R01_cb13872_c5/f1p0/1280     | NA                          | R01_cb13872_c5/f1p0/1280     |
| R01_cb11109_c5/f1p0/1353     | NA                         | NA                           | NA                          | R01_cb11109_c5/f1p0/1353     |
| R01_cb11810_c1/f1p0/2214     | NA                         | R01_cb11810_c1/f1p0/2214     | NA                          | NA                           |
| R01_cb1982_c2/f1p0/2401      | NA                         | NA                           | R01_cb1982_c2/f1p0/2401     | R01_cb1982_c2/f1p0/2401      |
| R01_cb12228_c23/f1p0/786     | NA                         | R01_cb12228_c23/f1p0/786     | NA                          | R01_cb12228_c23/f1p0/786     |
| R01_cb7876_c2/f3p0/2504      | NA                         | R01_cb7876_c2/f3p0/2504      | NA                          | NA                           |
| R01_cb16020_c0/f2p0/486      | NA                         | R01_cb16020_c0/f2p0/486      | R01_cb16020_c0/f2p0/486     | R01_cb16020_c0/f2p0/486      |
| R01_cb8564_c90669/f1p0/2003  | NA                         | NA                           | NA                          | R01_cb8564_c90669/f1p0/2003  |
| R01_cb8564_c34518/f1p0/3136  | NA                         | R01_cb8564_c34518/f1p0/3136  | NA                          | NA                           |
| R01_cb9916_c0/f2p0/1517      | NA                         | NA                           | NA                          | R01_cb9916_c0/f2p0/1517      |
| R01_cb15757_c6/f1p0/1633     | NA                         | NA                           | NA                          | R01_cb15757_c6/f1p0/1633     |
| R01_cb4295_c12/f1p0/3169     | R01_cb4295_c12/f1p0/3169   | R01_cb4295_c12/f1p0/3169     | NA                          | NA                           |
| R01_cb6623_c25/f1p0/2847     | NA                         | NA                           | NA                          | R01_cb6623_c25/f1p0/2847     |
| R01_cb4652_c8/f1p0/852       | R01_cb4652_c8/f1p0/852     | R01_cb4652_c8/f1p0/852       | R01_cb4652_c8/f1p0/852      | R01_cb4652_c8/f1p0/852       |
| R01_cb8991_c7/f1p0/2097      | NA                         | NA                           | NA                          | R01_cb8991_c7/f1p0/2097      |
| R01_cb8564_c46350/f1p0/3446  | NA                         | NA                           | NA                          | R01_cb8564_c46350/f1p0/3446  |
| R01_cb8564_c4095/f1p0/4108   | R01_cb8564_c4095/f1p0/4108 | R01_cb8564_c4095/f1p0/4108   | R01_cb8564_c4095/f1p0/4108  | R01_cb8564_c4095/f1p0/4108   |
| R01_cb8564_c71655/f1p0/3284  | NA                         | R01_cb8564_c71655/f1p0/3284  | R01_cb8564_c71655/f1p0/3284 | R01_cb8564_c71655/f1p0/3284  |
| R01_cb15531_c1/f1p0/1352     | NA                         | R01_cb15531_c1/f1p0/1352     | NA                          | R01_cb15531_c1/f1p0/1352     |
| R01_cb115_c0/f1p0/4959       | NA                         | NA                           | NA                          | R01_cb115_c0/f1p0/4959       |
| R01_cb8295_c4/f1p0/2139      | NA                         | NA                           | NA                          | R01_cb8295_c4/f1p0/2139      |
| R01_cb10968_c1/f2p0/673      | NA                         | R01_cb10968_c1/f2p0/673      | R01_cb10968_c1/f2p0/673     | R01_cb10968_c1/f2p0/673      |

|                                  |                                  |                                  |                                  |                             |
|----------------------------------|----------------------------------|----------------------------------|----------------------------------|-----------------------------|
| R01_cb3218_c3/f1p0/4354          | NA                               | NA                               | NA                               | R01_cb3218_c3/f1p0/4354     |
| R01_cb7985_c4/f1p0/2097          | NA                               | R01_cb7985_c4/f1p0/2097          | R01_cb7985_c4/f1p0/2097          | NA                          |
| R01_cb13996_c3/f2p1/740          | NA                               | R01_cb13996_c3/f2p1/740          | NA                               | NA                          |
| R01_cb6272_c1/f10p2/2582         | NA                               | NA                               | NA                               | R01_cb6272_c1/f10p2/2582    |
| R01_cb8564_c79032/f3p0/2300      | NA                               | NA                               | NA                               | R01_cb8564_c79032/f3p0/2300 |
| R01_cb18409_c78/f1p0/403         | R01_cb18409_c78/f1p0/403         | R01_cb18409_c78/f1p0/403         | R01_cb18409_c78/f1p0/403         | R01_cb18409_c78/f1p0/403    |
| R01_cb352_c2/f1p0/2991           | NA                               | R01_cb352_c2/f1p0/2991           | NA                               | R01_cb352_c2/f1p0/2991      |
| R01_cb8564_c122131/f1p0/406<br>5 | NA                               | R01_cb8564_c122131/f1p0/406<br>5 | R01_cb8564_c122131/f1p0/406<br>5 | NA                          |
| R01_cb3853_c3/f1p0/2530          | NA                               | R01_cb3853_c3/f1p0/2530          | NA                               | NA                          |
| R01_cb8564_c3779/f1p0/2570       | NA                               | R01_cb8564_c3779/f1p0/2570       | R01_cb8564_c3779/f1p0/2570       | R01_cb8564_c3779/f1p0/2570  |
| R01_cb14004_c3/f5p1/1366         | NA                               | NA                               | NA                               | R01_cb14004_c3/f5p1/1366    |
| R01_cb647_c13/f1p0/1621          | NA                               | NA                               | NA                               | R01_cb647_c13/f1p0/1621     |
| R01_cb4115_c12/f1p0/1357         | NA                               | NA                               | NA                               | R01_cb4115_c12/f1p0/1357    |
| R01_cb6059_c4/f1p0/2020          | NA                               | NA                               | NA                               | R01_cb6059_c4/f1p0/2020     |
| R01_cb11323_c0/f1p0/1289         | NA                               | NA                               | NA                               | R01_cb11323_c0/f1p0/1289    |
| R01_cb8564_c19850/f1p0/1904      | NA                               | NA                               | NA                               | R01_cb8564_c19850/f1p0/1904 |
| R01_cb16966_c2/f1p0/647          | R01_cb16966_c2/f1p0/647          | R01_cb16966_c2/f1p0/647          | NA                               | NA                          |
| R01_cb18409_c99/f1p0/415         | R01_cb18409_c99/f1p0/415         | R01_cb18409_c99/f1p0/415         | R01_cb18409_c99/f1p0/415         | R01_cb18409_c99/f1p0/415    |
| R01_cb8564_c73348/f1p0/1997<br>7 | R01_cb8564_c73348/f1p0/1997<br>7 | R01_cb8564_c73348/f1p0/1997      | R01_cb8564_c73348/f1p0/1997      | R01_cb8564_c73348/f1p0/1997 |
| R01_cb17103_c0/f2p0/1327         | NA                               | NA                               | NA                               | R01_cb17103_c0/f2p0/1327    |
| R01_cb4949_c3/f1p0/3120          | NA                               | NA                               | NA                               | R01_cb4949_c3/f1p0/3120     |
| R01_cb15069_c4/f1p0/442          | NA                               | R01_cb15069_c4/f1p0/442          | NA                               | NA                          |
| R01_cb11879_c7/f1p0/1721         | NA                               | NA                               | NA                               | R01_cb11879_c7/f1p0/1721    |
| R01_cb8564_c21275/f3p4/4047      | NA                               | NA                               | NA                               | R01_cb8564_c21275/f3p4/4047 |

|                              |                              |                              |                              |                              |
|------------------------------|------------------------------|------------------------------|------------------------------|------------------------------|
| R01_cb5378_c2/flp0/2616      | NA                           | NA                           | NA                           | R01_cb5378_c2/flp0/2616      |
| R01_cb6513_c2/flp0/2836      | NA                           | NA                           | NA                           | R01_cb6513_c2/flp0/2836      |
| R01_cb13146_c10/f8p2/607     | NA                           | R01_cb13146_c10/f8p2/607     | R01_cb13146_c10/f8p2/607     | R01_cb13146_c10/f8p2/607     |
| R01_cb4128_c27/flp0/1127     | NA                           | NA                           | NA                           | R01_cb4128_c27/flp0/1127     |
| R01_cb12656_c5/flp0/1803     | NA                           | NA                           | NA                           | R01_cb12656_c5/flp0/1803     |
| R01_cb13667_c1/flp0/815      | NA                           | R01_cb13667_c1/flp0/815      | R01_cb13667_c1/flp0/815      | R01_cb13667_c1/flp0/815      |
| R01_cb8279_c0/f5p0/1893      | NA                           | NA                           | NA                           | R01_cb8279_c0/f5p0/1893      |
| R01_cb18456_c7743/fl32p2/612 | R01_cb18456_c7743/fl32p2/612 | R01_cb18456_c7743/fl32p2/612 | R01_cb18456_c7743/fl32p2/612 | R01_cb18456_c7743/fl32p2/612 |
| R01_cb2682_c2/flp0/3291      | NA                           | NA                           | NA                           | R01_cb2682_c2/flp0/3291      |
| R01_cb2298_c2/flp0/3767      | NA                           | R01_cb2298_c2/flp0/3767      | R01_cb2298_c2/flp0/3767      | R01_cb2298_c2/flp0/3767      |
| R01_cb9960_c3/flp0/1881      | NA                           | NA                           | NA                           | R01_cb9960_c3/flp0/1881      |
| R01_cb8564_c89144/flp0/2639  | NA                           | R01_cb8564_c89144/flp0/2639  | NA                           | NA                           |
| R01_cb8564_c77590/flp5/2762  | NA                           | NA                           | NA                           | R01_cb8564_c77590/flp5/2762  |
| R01_cb2309_c9/flp0/1954      | NA                           | R01_cb2309_c9/flp0/1954      | R01_cb2309_c9/flp0/1954      | NA                           |
| R01_cb9504_c3/flp0/492       | R01_cb9504_c3/flp0/492       | R01_cb9504_c3/flp0/492       | R01_cb9504_c3/flp0/492       | R01_cb9504_c3/flp0/492       |
| R01_cb15312_c1/flp1/711      | NA                           | R01_cb15312_c1/flp1/711      | R01_cb15312_c1/flp1/711      | R01_cb15312_c1/flp1/711      |
| R01_cb14909_c0/flp0/664      | R01_cb14909_c0/flp0/664      | R01_cb14909_c0/flp0/664      | R01_cb14909_c0/flp0/664      | R01_cb14909_c0/flp0/664      |
| R01_cb15552_c3/flp0/1704     | NA                           | NA                           | R01_cb15552_c3/flp0/1704     | R01_cb15552_c3/flp0/1704     |
| R01_cb18542_c0/flp0/752      | NA                           | R01_cb18542_c0/flp0/752      | NA                           | NA                           |
| R01_cb11544_c2/flp0/1768     | NA                           | R01_cb11544_c2/flp0/1768     | NA                           | NA                           |
| R01_cb10145_c1/f2p0/1612     | NA                           | NA                           | NA                           | R01_cb10145_c1/f2p0/1612     |
| R01_cb8564_c88953/flp0/3767  | NA                           | R01_cb8564_c88953/flp0/3767  | NA                           | NA                           |
| R01_cb4094_c8/f2p0/2920      | NA                           | R01_cb4094_c8/f2p0/2920      | NA                           | NA                           |
| R01_cb18335_c2/flp0/994      | R01_cb18335_c2/flp0/994      | R01_cb18335_c2/flp0/994      | R01_cb18335_c2/flp0/994      | R01_cb18335_c2/flp0/994      |
| R01_cb8564_c72602/flp0/2743  | NA                           | NA                           | NA                           | R01_cb8564_c72602/flp0/2743  |

|                              |                            |                              |                            |                            |
|------------------------------|----------------------------|------------------------------|----------------------------|----------------------------|
| R01_cb1487_c10/flp0/1153     | NA                         | NA                           | NA                         | R01_cb1487_c10/flp0/1153   |
| R01_cb14054_c12/flp0/536     | R01_cb14054_c12/flp0/536   | R01_cb14054_c12/flp0/536     | R01_cb14054_c12/flp0/536   | R01_cb14054_c12/flp0/536   |
| R01_cb8434_c2/flp0/2304      | NA                         | R01_cb8434_c2/flp0/2304      | NA                         | NA                         |
| R01_cb3658_c10/flp0/2198     | NA                         | NA                           | NA                         | R01_cb3658_c10/flp0/2198   |
| R01_cb1594_c6/flp1/2130      | NA                         | NA                           | NA                         | R01_cb1594_c6/flp1/2130    |
| R01_cb8564_c130313/flp0/2329 | NA                         | R01_cb8564_c130313/flp0/2329 | NA                         | NA                         |
| R01_cb13284_c1/f5p0/1845     | NA                         | NA                           | NA                         | R01_cb13284_c1/f5p0/1845   |
| R01_cb5452_c2/flp0/972       | NA                         | NA                           | NA                         | R01_cb5452_c2/flp0/972     |
| R01_cb6608_c10/flp0/2307     | NA                         | NA                           | NA                         | R01_cb6608_c10/flp0/2307   |
| R01_cb369_c15/flp0/1175      | NA                         | NA                           | NA                         | R01_cb369_c15/flp0/1175    |
| R01_cb2418_c9/flp0/3155      | NA                         | R01_cb2418_c9/flp0/3155      | R01_cb2418_c9/flp0/3155    | R01_cb2418_c9/flp0/3155    |
| R01_cb8564_c4200/flp0/2947   | R01_cb8564_c4200/flp0/2947 | R01_cb8564_c4200/flp0/2947   | NA                         | NA                         |
| R01_cb8485_c9/flp0/805       | NA                         | R01_cb8485_c9/flp0/805       | R01_cb8485_c9/flp0/805     | R01_cb8485_c9/flp0/805     |
| R01_cb7010_c17/flp1/1911     | NA                         | NA                           | NA                         | R01_cb7010_c17/flp1/1911   |
| R01_cb10121_c2/flp0/2778     | NA                         | R01_cb10121_c2/flp0/2778     | NA                         | R01_cb10121_c2/flp0/2778   |
| R01_cb13662_c2/flp0/492      | R01_cb13662_c2/flp0/492    | R01_cb13662_c2/flp0/492      | NA                         | R01_cb13662_c2/flp0/492    |
| R01_cb12577_c19/f3p0/365     | R01_cb12577_c19/f3p0/365   | R01_cb12577_c19/f3p0/365     | R01_cb12577_c19/f3p0/365   | R01_cb12577_c19/f3p0/365   |
| R01_cb5896_c102/flp0/2978    | NA                         | NA                           | R01_cb5896_c102/flp0/2978  | NA                         |
| R01_cb16705_c0/flp0/828      | NA                         | R01_cb16705_c0/flp0/828      | R01_cb16705_c0/flp0/828    | R01_cb16705_c0/flp0/828    |
| R01_cb10024_c427/flp0/631    | NA                         | R01_cb10024_c427/flp0/631    | NA                         | NA                         |
| R01_cb13012_c6/flp1/1128     | NA                         | NA                           | NA                         | R01_cb13012_c6/flp1/1128   |
| R01_cb18456_c1698/f2p1/564   | R01_cb18456_c1698/f2p1/564 | R01_cb18456_c1698/f2p1/564   | R01_cb18456_c1698/f2p1/564 | R01_cb18456_c1698/f2p1/564 |
| R01_cb12057_c17/flp0/1531    | NA                         | R01_cb12057_c17/flp0/1531    | NA                         | NA                         |
| R01_cb3744_c9/flp0/3017      | NA                         | NA                           | NA                         | R01_cb3744_c9/flp0/3017    |
| R01_cb12785_c21/flp0/843     | NA                         | NA                           | R01_cb12785_c21/flp0/843   | NA                         |

|                             |                         |                           |                           |                             |
|-----------------------------|-------------------------|---------------------------|---------------------------|-----------------------------|
| R01_cb14909_c3/flp0/694     | R01_cb14909_c3/flp0/694 | NA                        | NA                        | R01_cb14909_c3/flp0/694     |
| R01_cb6947_c11/flp0/4007    | NA                      | R01_cb6947_c11/flp0/4007  | NA                        | R01_cb6947_c11/flp0/4007    |
| R01_cb17734_c1/flp0/1628    | NA                      | NA                        | NA                        | R01_cb17734_c1/flp0/1628    |
| R01_cb1860_c7/f3p3/2443     | NA                      | NA                        | NA                        | R01_cb1860_c7/f3p3/2443     |
| R01_cb12421_c27/f2p0/525    | NA                      | R01_cb12421_c27/f2p0/525  | NA                        | NA                          |
| R01_cb11370_c4/flp0/2621    | NA                      | NA                        | NA                        | R01_cb11370_c4/flp0/2621    |
| R01_cb11318_c1/flp0/2588    | NA                      | NA                        | NA                        | R01_cb11318_c1/flp0/2588    |
| R01_cb11208_c3/flp0/1456    | NA                      | NA                        | NA                        | R01_cb11208_c3/flp0/1456    |
| R01_cb7064_c5/f2p0/599      | R01_cb7064_c5/f2p0/599  | R01_cb7064_c5/f2p0/599    | R01_cb7064_c5/f2p0/599    | R01_cb7064_c5/f2p0/599      |
| R01_cb14139_c9/flp0/1662    | NA                      | R01_cb14139_c9/flp0/1662  | NA                        | NA                          |
| R01_cb8942_c61/flp0/2131    | NA                      | R01_cb8942_c61/flp0/2131  | NA                        | NA                          |
| R01_cb11654_c1/flp0/2059    | NA                      | NA                        | NA                        | R01_cb11654_c1/flp0/2059    |
| R01_cb9350_c4/flp0/1655     | NA                      | R01_cb9350_c4/flp0/1655   | NA                        | NA                          |
| R01_cb13938_c18/f4p0/1404   | NA                      | NA                        | NA                        | R01_cb13938_c18/f4p0/1404   |
| R01_cb8564_c79829/flp0/2440 | NA                      | NA                        | NA                        | R01_cb8564_c79829/flp0/2440 |
| R01_cb1336_c2/flp0/2147     | NA                      | NA                        | NA                        | R01_cb1336_c2/flp0/2147     |
| R01_cb14236_c0/flp0/617     | R01_cb14236_c0/flp0/617 | R01_cb14236_c0/flp0/617   | R01_cb14236_c0/flp0/617   | R01_cb14236_c0/flp0/617     |
| R01_cb12329_c15/flp0/1249   | NA                      | NA                        | NA                        | R01_cb12329_c15/flp0/1249   |
| R01_cb7302_c3/flp0/1867     | NA                      | NA                        | NA                        | R01_cb7302_c3/flp0/1867     |
| R01_cb18301_c55/flp0/1041   | NA                      | R01_cb18301_c55/flp0/1041 | R01_cb18301_c55/flp0/1041 | R01_cb18301_c55/flp0/1041   |
| R01_cb8545_c6/flp0/872      | NA                      | NA                        | R01_cb8545_c6/flp0/872    | R01_cb8545_c6/flp0/872      |
| R01_cb18439_c0/f2p0/1428    | NA                      | R01_cb18439_c0/f2p0/1428  | R01_cb18439_c0/f2p0/1428  | R01_cb18439_c0/f2p0/1428    |
| R01_cb8478_c17/flp0/3310    | NA                      | R01_cb8478_c17/flp0/3310  | NA                        | NA                          |
| R01_cb8564_c73670/flp0/1929 | NA                      | NA                        | NA                        | R01_cb8564_c73670/flp0/1929 |
| R01_cb5517_c1/flp0/2876     | NA                      | NA                        | R01_cb5517_c1/flp0/2876   | NA                          |
| R01_cb6994_c5/flp0/7066     | NA                      | R01_cb6994_c5/flp0/7066   | NA                        | NA                          |

|                             |                          |                             |                             |                             |
|-----------------------------|--------------------------|-----------------------------|-----------------------------|-----------------------------|
| R01_cb18456_c6628/f1p0/903  | NA                       | NA                          | NA                          | R01_cb18456_c6628/f1p0/903  |
| R01_cb8564_c146682/f3p0/255 | NA                       | R01_cb8564_c146682/f3p0/255 | R01_cb8564_c146682/f3p0/255 | R01_cb8564_c146682/f3p0/255 |
| 2                           |                          | 2                           | 2                           | 2                           |
| R01_cb8564_c121469/f1p0/261 | NA                       | R01_cb8564_c121469/f1p0/261 | NA                          | NA                          |
| 5                           |                          | 5                           |                             |                             |
| R01_cb14886_c4/f1p0/773     | NA                       | NA                          | R01_cb14886_c4/f1p0/773     | NA                          |
| R01_cb8564_c125619/f1p0/388 | NA                       | R01_cb8564_c125619/f1p0/388 | NA                          | NA                          |
| 0                           |                          | 0                           |                             |                             |
| R01_cb17756_c27/f1p0/462    | R01_cb17756_c27/f1p0/462 | R01_cb17756_c27/f1p0/462    | R01_cb17756_c27/f1p0/462    | R01_cb17756_c27/f1p0/462    |
| R01_cb14322_c1/f2p2/1452    | NA                       | R01_cb14322_c1/f2p2/1452    | R01_cb14322_c1/f2p2/1452    | R01_cb14322_c1/f2p2/1452    |
| R01_cb8564_c12923/f1p0/2513 | NA                       | R01_cb8564_c12923/f1p0/2513 | NA                          | R01_cb8564_c12923/f1p0/2513 |
| R01_cb261_c2/f3p0/2415      | NA                       | NA                          | NA                          | R01_cb261_c2/f3p0/2415      |
| R01_cb7757_c15/f1p0/670     | NA                       | NA                          | R01_cb7757_c15/f1p0/670     | R01_cb7757_c15/f1p0/670     |
| R01_cb8564_c22048/f5p0/4425 | NA                       | NA                          | NA                          | R01_cb8564_c22048/f5p0/4425 |
| R01_cb15096_c3/f1p0/1532    | NA                       | NA                          | NA                          | R01_cb15096_c3/f1p0/1532    |
| R01_cb16270_c2/f1p0/406     | R01_cb16270_c2/f1p0/406  | NA                          | R01_cb16270_c2/f1p0/406     | R01_cb16270_c2/f1p0/406     |
| R01_cb15644_c2/f2p0/467     | NA                       | R01_cb15644_c2/f2p0/467     | R01_cb15644_c2/f2p0/467     | R01_cb15644_c2/f2p0/467     |
| R01_cb13478_c9/f1p0/552     | NA                       | R01_cb13478_c9/f1p0/552     | R01_cb13478_c9/f1p0/552     | R01_cb13478_c9/f1p0/552     |
| R01_cb8356_c3/f1p0/1027     | NA                       | R01_cb8356_c3/f1p0/1027     | R01_cb8356_c3/f1p0/1027     | R01_cb8356_c3/f1p0/1027     |
| R01_cb8564_c72659/f1p0/4124 | NA                       | NA                          | NA                          | R01_cb8564_c72659/f1p0/4124 |
| R01_cb17392_c1/f1p1/969     | NA                       | R01_cb17392_c1/f1p1/969     | R01_cb17392_c1/f1p1/969     | R01_cb17392_c1/f1p1/969     |
| R01_cb11918_c23/f1p0/1229   | NA                       | NA                          | NA                          | R01_cb11918_c23/f1p0/1229   |
| R01_cb7214_c9/f1p0/2049     | NA                       | NA                          | NA                          | R01_cb7214_c9/f1p0/2049     |
| R01_cb14843_c0/f2p0/1417    | NA                       | NA                          | NA                          | R01_cb14843_c0/f2p0/1417    |
| R01_cb11124_c3/f1p0/951     | R01_cb11124_c3/f1p0/951  | R01_cb11124_c3/f1p0/951     | R01_cb11124_c3/f1p0/951     | R01_cb11124_c3/f1p0/951     |
| R01_cb7334_c3/f1p0/2645     | NA                       | NA                          | NA                          | R01_cb7334_c3/f1p0/2645     |

|                              |                             |                              |                             |                             |
|------------------------------|-----------------------------|------------------------------|-----------------------------|-----------------------------|
| R01_cb1915_c46/flp0/614      | R01_cb1915_c46/flp0/614     | R01_cb1915_c46/flp0/614      | R01_cb1915_c46/flp0/614     | R01_cb1915_c46/flp0/614     |
| R01_cb8564_c43626/flp0/2815  | NA                          | NA                           | NA                          | R01_cb8564_c43626/flp0/2815 |
| R01_cb8564_c92212/flp0/2726  | R01_cb8564_c92212/flp0/2726 | R01_cb8564_c92212/flp0/2726  | R01_cb8564_c92212/flp0/2726 | R01_cb8564_c92212/flp0/2726 |
| R01_cb4352_c6/flp0/2422      | NA                          | NA                           | NA                          | R01_cb4352_c6/flp0/2422     |
| R01_cb8564_c110889/flp1/2516 | NA                          | R01_cb8564_c110889/flp1/2516 | NA                          | NA                          |
| R01_cb14469_c5/f5p2/672      | R01_cb14469_c5/f5p2/672     | R01_cb14469_c5/f5p2/672      | R01_cb14469_c5/f5p2/672     | R01_cb14469_c5/f5p2/672     |
| R01_cb11621_c1/flp0/2911     | NA                          | R01_cb11621_c1/flp0/2911     | NA                          | NA                          |
| R01_cb10443_c1/flp1/2146     | R01_cb10443_c1/flp1/2146    | R01_cb10443_c1/flp1/2146     | R01_cb10443_c1/flp1/2146    | NA                          |
| R01_cb11603_c0/flp0/1217     | NA                          | R01_cb11603_c0/flp0/1217     | NA                          | NA                          |
| R01_cb2619_c3/flp1/2037      | NA                          | NA                           | NA                          | R01_cb2619_c3/flp1/2037     |
| R01_cb12677_c0/f5p0/936      | NA                          | NA                           | NA                          | R01_cb12677_c0/f5p0/936     |
| R01_cb13545_c66/flp0/1196    | NA                          | R01_cb13545_c66/flp0/1196    | NA                          | R01_cb13545_c66/flp0/1196   |
| R01_cb3929_c14/flp0/3015     | NA                          | NA                           | NA                          | R01_cb3929_c14/flp0/3015    |
| R01_cb9232_c2/flp0/2604      | NA                          | NA                           | NA                          | R01_cb9232_c2/flp0/2604     |
| R01_cb5394_c1/flp0/3111      | NA                          | NA                           | NA                          | R01_cb5394_c1/flp0/3111     |
| R01_cb18369_c0/flp0/562      | R01_cb18369_c0/flp0/562     | R01_cb18369_c0/flp0/562      | R01_cb18369_c0/flp0/562     | R01_cb18369_c0/flp0/562     |
| R01_cb18456_c5206/flp0/1413  | NA                          | R01_cb18456_c5206/flp0/1413  | NA                          | NA                          |
| R01_cb18456_c3893/flp1/1629  | NA                          | NA                           | NA                          | R01_cb18456_c3893/flp1/1629 |
| R01_cb2959_c3/flp0/3317      | NA                          | NA                           | NA                          | R01_cb2959_c3/flp0/3317     |
| R01_cb14481_c5/flp0/466      | NA                          | R01_cb14481_c5/flp0/466      | NA                          | R01_cb14481_c5/flp0/466     |
| R01_cb2698_c5/flp0/1933      | NA                          | NA                           | NA                          | R01_cb2698_c5/flp0/1933     |
| R01_cb12191_c2/f4p1/769      | NA                          | NA                           | NA                          | R01_cb12191_c2/f4p1/769     |
| R01_cb8564_c50051/flp0/2016  | NA                          | NA                           | NA                          | R01_cb8564_c50051/flp0/2016 |
| R01_cb8819_c4/f2p0/2165      | NA                          | NA                           | NA                          | R01_cb8819_c4/f2p0/2165     |



|                              |                              |                              |                              |                              |
|------------------------------|------------------------------|------------------------------|------------------------------|------------------------------|
| R01_cb9201_c4/flp0/2116      | NA                           | NA                           | NA                           | R01_cb9201_c4/flp0/2116      |
| R01_cb8564_c129649/flp0/3138 | R01_cb8564_c129649/flp0/3138 | R01_cb8564_c129649/flp0/3138 | R01_cb8564_c129649/flp0/3138 | R01_cb8564_c129649/flp0/3138 |
| R01_cb15950_c3/flp0/1525     | R01_cb15950_c3/flp0/1525     | R01_cb15950_c3/flp0/1525     | NA                           | R01_cb15950_c3/flp0/1525     |
| R01_cb2482_c51/flp0/1527     | R01_cb2482_c51/flp0/1527     | R01_cb2482_c51/flp0/1527     | NA                           | R01_cb2482_c51/flp0/1527     |
| R01_cb110_c24/flp0/4568      | NA                           | NA                           | NA                           | R01_cb110_c24/flp0/4568      |
| R01_cb4444_c22/flp0/3073     | NA                           | R01_cb4444_c22/flp0/3073     | NA                           | NA                           |
| R01_cb10364_c1/f2p0/1719     | NA                           | NA                           | NA                           | R01_cb10364_c1/f2p0/1719     |
| R01_cb9799_c3/flp0/2671      | R01_cb9799_c3/flp0/2671      | R01_cb9799_c3/flp0/2671      | R01_cb9799_c3/flp0/2671      | R01_cb9799_c3/flp0/2671      |
| R01_cb9123_c1/flp0/2566      | NA                           | R01_cb9123_c1/flp0/2566      | NA                           | NA                           |
| R01_cb17405_c0/flp0/1832     | NA                           | R01_cb17405_c0/flp0/1832     | NA                           | NA                           |
| R01_cb5183_c82/flp1/1654     | NA                           | NA                           | NA                           | R01_cb5183_c82/flp1/1654     |
| R01_cb18456_c1338/f2p0/461   | R01_cb18456_c1338/f2p0/461   | R01_cb18456_c1338/f2p0/461   | R01_cb18456_c1338/f2p0/461   | R01_cb18456_c1338/f2p0/461   |
| R01_cb10905_c5/flp0/2890     | NA                           | NA                           | NA                           | R01_cb10905_c5/flp0/2890     |
| R01_cb6631_c24/flp0/2092     | NA                           | NA                           | NA                           | R01_cb6631_c24/flp0/2092     |
| R01_cb8564_c84613/flp0/3096  | NA                           | R01_cb8564_c84613/flp0/3096  | NA                           | R01_cb8564_c84613/flp0/3096  |
| R01_cb18200_c2/flp0/390      | R01_cb18200_c2/flp0/390      | R01_cb18200_c2/flp0/390      | R01_cb18200_c2/flp0/390      | R01_cb18200_c2/flp0/390      |
| R01_cb11116_c0/flp0/1869     | NA                           | NA                           | NA                           | R01_cb11116_c0/flp0/1869     |
| R01_cb10326_c9/flp0/941      | NA                           | R01_cb10326_c9/flp0/941      | NA                           | NA                           |
| R01_cb8939_c6/flp0/2221      | NA                           | R01_cb8939_c6/flp0/2221      | NA                           | NA                           |
| R01_cb16706_c3/flp0/774      | NA                           | R01_cb16706_c3/flp0/774      | NA                           | R01_cb16706_c3/flp0/774      |
| R01_cb709_c9/flp0/2033       | NA                           | R01_cb709_c9/flp0/2033       | NA                           | NA                           |
| R01_cb16677_c0/flp0/1522     | R01_cb16677_c0/flp0/1522     | R01_cb16677_c0/flp0/1522     | R01_cb16677_c0/flp0/1522     | R01_cb16677_c0/flp0/1522     |
| R01_cb2420_c8/flp0/2228      | NA                           | R01_cb2420_c8/flp0/2228      | NA                           | R01_cb2420_c8/flp0/2228      |
| R01_cb10738_c13/flp0/583     | NA                           | R01_cb10738_c13/flp0/583     | NA                           | R01_cb10738_c13/flp0/583     |
| R01_cb5953_c0/f4p0/2900      | NA                           | NA                           | NA                           | R01_cb5953_c0/f4p0/2900      |

|                                  |                          |                                  |                             |                             |
|----------------------------------|--------------------------|----------------------------------|-----------------------------|-----------------------------|
| R01_cb17357_c1/f1p0/373          | R01_cb17357_c1/f1p0/373  | R01_cb17357_c1/f1p0/373          | NA                          | NA                          |
| R01_cb3432_c1/f3p0/3558          | R01_cb3432_c1/f3p0/3558  | R01_cb3432_c1/f3p0/3558          | NA                          | NA                          |
| R01_cb8564_c53293/f1p0/2959      | NA                       | R01_cb8564_c53293/f1p0/2959      | R01_cb8564_c53293/f1p0/2959 | R01_cb8564_c53293/f1p0/2959 |
| R01_cb9848_c5/f1p0/773           | NA                       | NA                               | NA                          | R01_cb9848_c5/f1p0/773      |
| R01_cb8564_c16265/f1p0/3359      | NA                       | R01_cb8564_c16265/f1p0/3359      | NA                          | NA                          |
| R01_cb18456_c7778/f23p0/582      | NA                       | NA                               | R01_cb18456_c7778/f23p0/582 | R01_cb18456_c7778/f23p0/582 |
| R01_cb18745_c3/f1p0/1409         | NA                       | NA                               | NA                          | R01_cb18745_c3/f1p0/1409    |
| R01_cb5874_c37/f1p0/973          | NA                       | NA                               | NA                          | R01_cb5874_c37/f1p0/973     |
| R01_cb10012_c2/f1p0/3244         | NA                       | R01_cb10012_c2/f1p0/3244         | NA                          | NA                          |
| R01_cb13290_c8/f1p0/1002         | NA                       | R01_cb13290_c8/f1p0/1002         | NA                          | NA                          |
| R01_cb8564_c38241/f1p0/2298      | NA                       | R01_cb8564_c38241/f1p0/2298      | R01_cb8564_c38241/f1p0/2298 | R01_cb8564_c38241/f1p0/2298 |
| R01_cb9593_c13/f1p0/418          | R01_cb9593_c13/f1p0/418  | R01_cb9593_c13/f1p0/418          | NA                          | R01_cb9593_c13/f1p0/418     |
| R01_cb8564_c114193/f1p0/248<br>2 | NA                       | R01_cb8564_c114193/f1p0/248<br>2 | NA                          | NA                          |
| R01_cb8564_c21849/f1p3/3972      | NA                       | R01_cb8564_c21849/f1p3/3972      | R01_cb8564_c21849/f1p3/3972 | NA                          |
| R01_cb10970_c3/f1p0/1004         | NA                       | NA                               | NA                          | R01_cb10970_c3/f1p0/1004    |
| R01_cb17374_c4/f1p1/826          | NA                       | NA                               | NA                          | R01_cb17374_c4/f1p1/826     |
| R01_cb11491_c0/f1p0/1758         | R01_cb11491_c0/f1p0/1758 | R01_cb11491_c0/f1p0/1758         | R01_cb11491_c0/f1p0/1758    | R01_cb11491_c0/f1p0/1758    |
| R01_cb12609_c0/f5p0/770          | NA                       | NA                               | NA                          | R01_cb12609_c0/f5p0/770     |
| R01_cb2205_c1/f1p0/4012          | NA                       | R01_cb2205_c1/f1p0/4012          | NA                          | R01_cb2205_c1/f1p0/4012     |
| R01_cb12652_c0/f1p0/936          | NA                       | NA                               | NA                          | R01_cb12652_c0/f1p0/936     |
| R01_cb8564_c107826/f2p1/333<br>5 | NA                       | R01_cb8564_c107826/f2p1/333<br>5 | NA                          | NA                          |
| R01_cb8564_c116710/f1p0/315<br>9 | NA                       | R01_cb8564_c116710/f1p0/315<br>9 | NA                          | NA                          |
| R01_cb4529_c16/f2p0/753          | NA                       | R01_cb4529_c16/f2p0/753          | NA                          | NA                          |

|                                  |                          |                                  |                          |                                  |
|----------------------------------|--------------------------|----------------------------------|--------------------------|----------------------------------|
| R01_cb16387_c2/flp0/1651         | NA                       | NA                               | NA                       | R01_cb16387_c2/flp0/1651         |
| R01_cb8386_c3/flp1/1067          | NA                       | R01_cb8386_c3/flp1/1067          | R01_cb8386_c3/flp1/1067  | R01_cb8386_c3/flp1/1067          |
| R01_cb6740_c8/flp0/2782          | NA                       | NA                               | NA                       | R01_cb6740_c8/flp0/2782          |
| R01_cb8564_c127693/flp0/309<br>2 | NA                       | NA                               | NA                       | R01_cb8564_c127693/flp0/309<br>2 |
| R01_cb7877_c0/f2p0/1003          | NA                       | NA                               | NA                       | R01_cb7877_c0/f2p0/1003          |
| R01_cb18456_c5734/flp0/938       | NA                       | R01_cb18456_c5734/flp0/938       | NA                       | NA                               |
| R01_cb17432_c7/f3p0/639          | NA                       | R01_cb17432_c7/f3p0/639          | NA                       | NA                               |
| R01_cb12775_c2/flp2/1418         | NA                       | NA                               | NA                       | R01_cb12775_c2/flp2/1418         |
| R01_cb5815_c13/flp0/1007         | R01_cb5815_c13/flp0/1007 | R01_cb5815_c13/flp0/1007         | NA                       | R01_cb5815_c13/flp0/1007         |
| R01_cb9535_c15/flp1/2071         | NA                       | R01_cb9535_c15/flp1/2071         | R01_cb9535_c15/flp1/2071 | R01_cb9535_c15/flp1/2071         |
| R01_cb8564_c22413/flp0/3916      | NA                       | R01_cb8564_c22413/flp0/3916      | NA                       | NA                               |
| R01_cb2918_c14/flp0/3768         | NA                       | NA                               | NA                       | R01_cb2918_c14/flp0/3768         |
| R01_cb2042_c6/flp0/2338          | NA                       | NA                               | NA                       | R01_cb2042_c6/flp0/2338          |
| R01_cb11431_c3/flp0/1165         | NA                       | R01_cb11431_c3/flp0/1165         | NA                       | R01_cb11431_c3/flp0/1165         |
| R01_cb7821_c1/flp0/2414          | R01_cb7821_c1/flp0/2414  | R01_cb7821_c1/flp0/2414          | R01_cb7821_c1/flp0/2414  | R01_cb7821_c1/flp0/2414          |
| R01_cb7168_c18/flp0/2936         | NA                       | R01_cb7168_c18/flp0/2936         | NA                       | R01_cb7168_c18/flp0/2936         |
| R01_cb8564_c52369/flp0/3232      | NA                       | NA                               | NA                       | R01_cb8564_c52369/flp0/3232      |
| R01_cb4094_c16/flp4/978          | NA                       | R01_cb4094_c16/flp4/978          | NA                       | NA                               |
| R01_cb8564_c126868/flp0/380<br>4 | NA                       | R01_cb8564_c126868/flp0/380<br>4 | NA                       | NA                               |
| R01_cb10318_c4/flp0/1697         | NA                       | R01_cb10318_c4/flp0/1697         | NA                       | R01_cb10318_c4/flp0/1697         |
| R01_cb14715_c1/f2p1/572          | R01_cb14715_c1/f2p1/572  | R01_cb14715_c1/f2p1/572          | R01_cb14715_c1/f2p1/572  | R01_cb14715_c1/f2p1/572          |
| R01_cb5580_c0/flp0/3069          | NA                       | R01_cb5580_c0/flp0/3069          | R01_cb5580_c0/flp0/3069  | NA                               |
| R01_cb14828_c0/flp0/1265         | NA                       | R01_cb14828_c0/flp0/1265         | R01_cb14828_c0/flp0/1265 | R01_cb14828_c0/flp0/1265         |
| R01_cb8564_c10387/flp0/4385      | NA                       | NA                               | NA                       | R01_cb8564_c10387/flp0/4385      |

|                              |                              |                              |                              |                              |
|------------------------------|------------------------------|------------------------------|------------------------------|------------------------------|
| R01_cb17363_c12/flp0/1314    | R01_cb17363_c12/flp0/1314    | R01_cb17363_c12/flp0/1314    | R01_cb17363_c12/flp0/1314    | R01_cb17363_c12/flp0/1314    |
| R01_cb8564_c13780/flp0/4204  | NA                           | R01_cb8564_c13780/flp0/4204  | R01_cb8564_c13780/flp0/4204  | R01_cb8564_c13780/flp0/4204  |
| R01_cb16799_c0/f6p0/728      | NA                           | NA                           | NA                           | R01_cb16799_c0/f6p0/728      |
| R01_cb10930_c1/flp0/2737     | R01_cb10930_c1/flp0/2737     | R01_cb10930_c1/flp0/2737     | R01_cb10930_c1/flp0/2737     | R01_cb10930_c1/flp0/2737     |
| R01_cb8441_c0/f3p0/1280      | NA                           | NA                           | NA                           | R01_cb8441_c0/f3p0/1280      |
| R01_cb16494_c3/f4p0/1448     | NA                           | NA                           | R01_cb16494_c3/f4p0/1448     | R01_cb16494_c3/f4p0/1448     |
| R01_cb17033_c3/flp0/1128     | NA                           | NA                           | NA                           | R01_cb17033_c3/flp0/1128     |
| R01_cb10373_c10/flp0/487     | NA                           | R01_cb10373_c10/flp0/487     | NA                           | NA                           |
| R01_cb10496_c7/f3p0/1482     | NA                           | NA                           | NA                           | R01_cb10496_c7/f3p0/1482     |
| R01_cb16876_c0/flp0/1250     | NA                           | NA                           | NA                           | R01_cb16876_c0/flp0/1250     |
| R01_cb10360_c15/flp0/598     | R01_cb10360_c15/flp0/598     | R01_cb10360_c15/flp0/598     | R01_cb10360_c15/flp0/598     | R01_cb10360_c15/flp0/598     |
| R01_cb3610_c0/flp0/3576      | NA                           | R01_cb3610_c0/flp0/3576      | NA                           | NA                           |
| R01_cb16677_c1/flp0/464      | R01_cb16677_c1/flp0/464      | R01_cb16677_c1/flp0/464      | R01_cb16677_c1/flp0/464      | R01_cb16677_c1/flp0/464      |
| R01_cb17732_c2/flp0/1043     | NA                           | R01_cb17732_c2/flp0/1043     | R01_cb17732_c2/flp0/1043     | R01_cb17732_c2/flp0/1043     |
| R01_cb8564_c112005/flp0/2719 | R01_cb8564_c112005/flp0/2719 | R01_cb8564_c112005/flp0/2719 | R01_cb8564_c112005/flp0/2719 | R01_cb8564_c112005/flp0/2719 |
| R01_cb11717_c0/flp0/501      | R01_cb11717_c0/flp0/501      | R01_cb11717_c0/flp0/501      | R01_cb11717_c0/flp0/501      | R01_cb11717_c0/flp0/501      |
| R01_cb13955_c4/flp0/552      | R01_cb13955_c4/flp0/552      | NA                           | NA                           | R01_cb13955_c4/flp0/552      |
| R01_cb14708_c0/f2p0/1091     | NA                           | R01_cb14708_c0/f2p0/1091     | NA                           | NA                           |
| R01_cb13490_c10/flp0/817     | R01_cb13490_c10/flp0/817     | R01_cb13490_c10/flp0/817     | R01_cb13490_c10/flp0/817     | R01_cb13490_c10/flp0/817     |
| R01_cb2804_c101/flp0/2548    | NA                           | R01_cb2804_c101/flp0/2548    | NA                           | NA                           |
| R01_cb12575_c4/flp0/1423     | NA                           | NA                           | NA                           | R01_cb12575_c4/flp0/1423     |
| R01_cb9658_c2/flp0/2335      | NA                           | NA                           | NA                           | R01_cb9658_c2/flp0/2335      |
| R01_cb6147_c9/flp0/2311      | NA                           | R01_cb6147_c9/flp0/2311      | NA                           | NA                           |
| R01_cb16772_c0/f3p0/1461     | NA                           | NA                           | NA                           | R01_cb16772_c0/f3p0/1461     |
| R01_cb8564_c9730/f3p9/4143   | NA                           | R01_cb8564_c9730/f3p9/4143   | R01_cb8564_c9730/f3p9/4143   | R01_cb8564_c9730/f3p9/4143   |

|                             |                             |                             |                             |                             |
|-----------------------------|-----------------------------|-----------------------------|-----------------------------|-----------------------------|
| R01_cb18764_c0/flp2/7450    | NA                          | NA                          | NA                          | R01_cb18764_c0/flp2/7450    |
| R01_cb16958_c0/f2p0/985     | NA                          | NA                          | NA                          | R01_cb16958_c0/f2p0/985     |
| R01_cb1847_c4/flp0/4203     | NA                          | NA                          | NA                          | R01_cb1847_c4/flp0/4203     |
| R01_cb15207_c14/f3p6/895    | NA                          | R01_cb15207_c14/f3p6/895    | NA                          | NA                          |
| R01_cb17604_c8/flp0/570     | NA                          | R01_cb17604_c8/flp0/570     | R01_cb17604_c8/flp0/570     | R01_cb17604_c8/flp0/570     |
| R01_cb12174_c3/flp1/671     | R01_cb12174_c3/flp1/671     | R01_cb12174_c3/flp1/671     | NA                          | R01_cb12174_c3/flp1/671     |
| R01_cb1138_c41/flp0/3215    | NA                          | NA                          | R01_cb1138_c41/flp0/3215    | NA                          |
| R01_cb8844_c0/flp0/2253     | NA                          | R01_cb8844_c0/flp0/2253     | NA                          | NA                          |
| R01_cb18520_c0/f2p0/1271    | NA                          | NA                          | NA                          | R01_cb18520_c0/f2p0/1271    |
| R01_cb1279_c85/flp0/1794    | NA                          | R01_cb1279_c85/flp0/1794    | NA                          | NA                          |
| R01_cb13318_c1/flp0/1654    | NA                          | NA                          | NA                          | R01_cb13318_c1/flp0/1654    |
| R01_cb1027_c5/flp0/4911     | NA                          | R01_cb1027_c5/flp0/4911     | NA                          | NA                          |
| R01_cb1398_c15/flp0/5057    | NA                          | R01_cb1398_c15/flp0/5057    | R01_cb1398_c15/flp0/5057    | NA                          |
| R01_cb8564_c79983/flp0/1945 | NA                          | R01_cb8564_c79983/flp0/1945 | NA                          | NA                          |
| R01_cb11667_c0/flp0/1403    | NA                          | NA                          | R01_cb11667_c0/flp0/1403    | NA                          |
| R01_cb15074_c10/flp0/587    | R01_cb15074_c10/flp0/587    | R01_cb15074_c10/flp0/587    | R01_cb15074_c10/flp0/587    | R01_cb15074_c10/flp0/587    |
| R01_cb10034_c43/flp2/953    | NA                          | R01_cb10034_c43/flp2/953    | NA                          | NA                          |
| R01_cb18456_c6626/flp0/723  | NA                          | R01_cb18456_c6626/flp0/723  | NA                          | NA                          |
| R01_cb10015_c231/flp0/502   | R01_cb10015_c231/flp0/502   | R01_cb10015_c231/flp0/502   | NA                          | NA                          |
| R01_cb8564_c38653/flp1/2281 | NA                          | R01_cb8564_c38653/flp1/2281 | NA                          | NA                          |
| R01_cb7962_c1/f2p1/1860     | NA                          | NA                          | NA                          | R01_cb7962_c1/f2p1/1860     |
| R01_cb8564_c74141/flp0/4167 | R01_cb8564_c74141/flp0/4167 | R01_cb8564_c74141/flp0/4167 | R01_cb8564_c74141/flp0/4167 | R01_cb8564_c74141/flp0/4167 |
| R01_cb242_c19/flp0/4151     | NA                          | NA                          | NA                          | R01_cb242_c19/flp0/4151     |
| R01_cb345_c31/flp0/1002     | NA                          | R01_cb345_c31/flp0/1002     | NA                          | NA                          |
| R01_cb3222_c14/flp0/472     | R01_cb3222_c14/flp0/472     | R01_cb3222_c14/flp0/472     | R01_cb3222_c14/flp0/472     | R01_cb3222_c14/flp0/472     |

|                             |                             |                             |                             |                             |
|-----------------------------|-----------------------------|-----------------------------|-----------------------------|-----------------------------|
| R01_cb17129_c2/flp0/1790    | NA                          | R01_cb17129_c2/flp0/1790    | NA                          | NA                          |
| R01_cb7051_c1/flp0/2781     | NA                          | NA                          | NA                          | R01_cb7051_c1/flp0/2781     |
| R01_cb3131_c7/flp0/7419     | NA                          | R01_cb3131_c7/flp0/7419     | NA                          | NA                          |
| R01_cb14261_c3/flp0/1245    | R01_cb14261_c3/flp0/1245    | R01_cb14261_c3/flp0/1245    | R01_cb14261_c3/flp0/1245    | R01_cb14261_c3/flp0/1245    |
| R01_cb8564_c88894/flp0/3482 | NA                          | R01_cb8564_c88894/flp0/3482 | NA                          | NA                          |
| R01_cb1780_c13/flp0/725     | NA                          | R01_cb1780_c13/flp0/725     | NA                          | NA                          |
| R01_cb1626_c13/flp0/4596    | NA                          | NA                          | NA                          | R01_cb1626_c13/flp0/4596    |
| R01_cb2161_c9/flp0/2205     | NA                          | NA                          | NA                          | R01_cb2161_c9/flp0/2205     |
| R01_cb16220_c1/flp0/708     | R01_cb16220_c1/flp0/708     | NA                          | NA                          | R01_cb16220_c1/flp0/708     |
| R01_cb4829_c41/flp0/3122    | NA                          | NA                          | NA                          | R01_cb4829_c41/flp0/3122    |
| R01_cb14074_c12/flp0/990    | R01_cb14074_c12/flp0/990    | R01_cb14074_c12/flp0/990    | NA                          | R01_cb14074_c12/flp0/990    |
| R01_cb14137_c1/flp0/864     | NA                          | NA                          | NA                          | R01_cb14137_c1/flp0/864     |
| R01_cb14292_c13/flp0/1808   | NA                          | R01_cb14292_c13/flp0/1808   | NA                          | NA                          |
| R01_cb5635_c2/flp0/3436     | NA                          | NA                          | NA                          | R01_cb5635_c2/flp0/3436     |
| R01_cb7966_c2/flp0/2492     | R01_cb7966_c2/flp0/2492     | R01_cb7966_c2/flp0/2492     | NA                          | NA                          |
| R01_cb2854_c39/flp0/3359    | NA                          | R01_cb2854_c39/flp0/3359    | NA                          | NA                          |
| R01_cb13352_c1/flp0/800     | NA                          | NA                          | R01_cb13352_c1/flp0/800     | R01_cb13352_c1/flp0/800     |
| R01_cb14729_c5/flp0/730     | NA                          | R01_cb14729_c5/flp0/730     | NA                          | NA                          |
| R01_cb6015_c6/flp0/2740     | NA                          | R01_cb6015_c6/flp0/2740     | NA                          | NA                          |
| R01_cb548_c60/flp0/2889     | NA                          | R01_cb548_c60/flp0/2889     | NA                          | NA                          |
| R01_cb8564_c18280/flp0/1947 | R01_cb8564_c18280/flp0/1947 | R01_cb8564_c18280/flp0/1947 | NA                          | NA                          |
| R01_cb14156_c1/flp0/881     | NA                          | R01_cb14156_c1/flp0/881     | R01_cb14156_c1/flp0/881     | R01_cb14156_c1/flp0/881     |
| R01_cb6278_c18/flp0/1671    | NA                          | NA                          | NA                          | R01_cb6278_c18/flp0/1671    |
| R01_cb8564_c52284/flp0/3798 | NA                          | R01_cb8564_c52284/flp0/3798 | R01_cb8564_c52284/flp0/3798 | R01_cb8564_c52284/flp0/3798 |
| R01_cb4838_c3/flp0/1177     | NA                          | R01_cb4838_c3/flp0/1177     | NA                          | NA                          |

|                              |                              |                              |                              |                              |
|------------------------------|------------------------------|------------------------------|------------------------------|------------------------------|
| R01_cb17052_c5/flp0/1297     | NA                           | NA                           | NA                           | R01_cb17052_c5/flp0/1297     |
| R01_cb6348_c12/f4p0/1764     | NA                           | NA                           | NA                           | R01_cb6348_c12/f4p0/1764     |
| R01_cb316_c21/flp0/2442      | NA                           | NA                           | NA                           | R01_cb316_c21/flp0/2442      |
| R01_cb18605_c1/flp0/868      | NA                           | R01_cb18605_c1/flp0/868      | R01_cb18605_c1/flp0/868      | R01_cb18605_c1/flp0/868      |
| R01_cb4639_c10/flp0/2558     | R01_cb4639_c10/flp0/2558     | R01_cb4639_c10/flp0/2558     | NA                           | R01_cb4639_c10/flp0/2558     |
| R01_cb10718_c3/flp0/4101     | NA                           | R01_cb10718_c3/flp0/4101     | NA                           | NA                           |
| R01_cb8564_c121938/flp0/2254 | NA                           | NA                           | NA                           | R01_cb8564_c121938/flp0/2254 |
| R01_cb16428_c1/flp0/607      | R01_cb16428_c1/flp0/607      | R01_cb16428_c1/flp0/607      | R01_cb16428_c1/flp0/607      | NA                           |
| R01_cb15045_c0/f4p0/1428     | NA                           | NA                           | NA                           | R01_cb15045_c0/f4p0/1428     |
| R01_cb6204_c5/f2p3/2918      | NA                           | NA                           | NA                           | R01_cb6204_c5/f2p3/2918      |
| R01_cb11891_c3/flp0/1790     | R01_cb11891_c3/flp0/1790     | R01_cb11891_c3/flp0/1790     | R01_cb11891_c3/flp0/1790     | R01_cb11891_c3/flp0/1790     |
| R01_cb8281_c6/flp0/2076      | NA                           | NA                           | NA                           | R01_cb8281_c6/flp0/2076      |
| R01_cb8564_c114202/flp0/2504 | R01_cb8564_c114202/flp0/2504 | R01_cb8564_c114202/flp0/2504 | R01_cb8564_c114202/flp0/2504 | NA                           |
| R01_cb18132_c12/flp0/1726    | NA                           | R01_cb18132_c12/flp0/1726    | NA                           | NA                           |
| R01_cb9682_c4/flp1/1998      | NA                           | NA                           | NA                           | R01_cb9682_c4/flp1/1998      |
| R01_cb9506_c6/flp0/3026      | R01_cb9506_c6/flp0/3026      | R01_cb9506_c6/flp0/3026      | NA                           | R01_cb9506_c6/flp0/3026      |
| R01_cb8564_c76021/flp0/2284  | NA                           | R01_cb8564_c76021/flp0/2284  | R01_cb8564_c76021/flp0/2284  | NA                           |
| R01_cb6328_c1/flp0/2584      | NA                           | NA                           | NA                           | R01_cb6328_c1/flp0/2584      |
| R01_cb7590_c2/flp0/2581      | R01_cb7590_c2/flp0/2581      | R01_cb7590_c2/flp0/2581      | NA                           | NA                           |
| R01_cb11221_c1/flp0/3463     | NA                           | R01_cb11221_c1/flp0/3463     | NA                           | NA                           |
| R01_cb17033_c4/flp0/1406     | NA                           | NA                           | NA                           | R01_cb17033_c4/flp0/1406     |
| R01_cb16881_c1/f2p1/1533     | NA                           | NA                           | NA                           | R01_cb16881_c1/f2p1/1533     |
| R01_cb9937_c3/flp0/1348      | NA                           | R01_cb9937_c3/flp0/1348      | R01_cb9937_c3/flp0/1348      | R01_cb9937_c3/flp0/1348      |
| R01_cb5745_c4/flp0/2698      | NA                           | R01_cb5745_c4/flp0/2698      | NA                           | R01_cb5745_c4/flp0/2698      |

|                             |                             |                             |                             |                             |
|-----------------------------|-----------------------------|-----------------------------|-----------------------------|-----------------------------|
| R01_cb10083_c5/flp0/2795    | NA                          | R01_cb10083_c5/flp0/2795    | NA                          | NA                          |
| R01_cb8564_c36813/flp0/3856 | NA                          | R01_cb8564_c36813/flp0/3856 | R01_cb8564_c36813/flp0/3856 | R01_cb8564_c36813/flp0/3856 |
| R01_cb8564_c91397/flp0/2896 | NA                          | NA                          | NA                          | R01_cb8564_c91397/flp0/2896 |
| R01_cb14045_c7/flp0/1601    | NA                          | NA                          | NA                          | R01_cb14045_c7/flp0/1601    |
| R01_cb8564_c16259/flp0/3399 | NA                          | R01_cb8564_c16259/flp0/3399 | NA                          | NA                          |
| R01_cb1487_c7/flp0/1224     | NA                          | NA                          | NA                          | R01_cb1487_c7/flp0/1224     |
| R01_cb4799_c14/flp0/2731    | NA                          | R01_cb4799_c14/flp0/2731    | R01_cb4799_c14/flp0/2731    | R01_cb4799_c14/flp0/2731    |
| R01_cb16594_c1/flp1/1222    | NA                          | R01_cb16594_c1/flp1/1222    | NA                          | R01_cb16594_c1/flp1/1222    |
| R01_cb11538_c1/flp0/2006    | R01_cb11538_c1/flp0/2006    | R01_cb11538_c1/flp0/2006    | NA                          | R01_cb11538_c1/flp0/2006    |
| R01_cb14283_c3/flp0/810     | R01_cb14283_c3/flp0/810     | R01_cb14283_c3/flp0/810     | R01_cb14283_c3/flp0/810     | NA                          |
| R01_cb7066_c2/flp0/2488     | NA                          | R01_cb7066_c2/flp0/2488     | R01_cb7066_c2/flp0/2488     | R01_cb7066_c2/flp0/2488     |
| R01_cb4368_c5/flp0/3249     | NA                          | NA                          | NA                          | R01_cb4368_c5/flp0/3249     |
| R01_cb8564_c72400/flp0/2371 | R01_cb8564_c72400/flp0/2371 | R01_cb8564_c72400/flp0/2371 | R01_cb8564_c72400/flp0/2371 | R01_cb8564_c72400/flp0/2371 |
| R01_cb6278_c3/flp0/2981     | NA                          | NA                          | NA                          | R01_cb6278_c3/flp0/2981     |
| R01_cb8294_c0/f3p0/2141     | NA                          | R01_cb8294_c0/f3p0/2141     | NA                          | NA                          |
| R01_cb13645_c4/flp0/611     | R01_cb13645_c4/flp0/611     | R01_cb13645_c4/flp0/611     | R01_cb13645_c4/flp0/611     | R01_cb13645_c4/flp0/611     |
| R01_cb10453_c5/flp0/1216    | NA                          | R01_cb10453_c5/flp0/1216    | R01_cb10453_c5/flp0/1216    | R01_cb10453_c5/flp0/1216    |
| R01_cb9968_c6/flp2/1828     | NA                          | R01_cb9968_c6/flp2/1828     | NA                          | NA                          |
| R01_cb1860_c16/flp1/2491    | NA                          | NA                          | NA                          | R01_cb1860_c16/flp1/2491    |
| R01_cb17635_c0/flp0/510     | R01_cb17635_c0/flp0/510     | R01_cb17635_c0/flp0/510     | R01_cb17635_c0/flp0/510     | R01_cb17635_c0/flp0/510     |
| R01_cb17812_c0/f2p0/664     | R01_cb17812_c0/f2p0/664     | R01_cb17812_c0/f2p0/664     | R01_cb17812_c0/f2p0/664     | R01_cb17812_c0/f2p0/664     |
| R01_cb5114_c3/flp0/912      | R01_cb5114_c3/flp0/912      | R01_cb5114_c3/flp0/912      | R01_cb5114_c3/flp0/912      | R01_cb5114_c3/flp0/912      |
| R01_cb14611_c2/flp0/642     | NA                          | NA                          | NA                          | R01_cb14611_c2/flp0/642     |
| R01_cb11234_c1/flp0/3532    | NA                          | R01_cb11234_c1/flp0/3532    | NA                          | NA                          |
| R01_cb13161_c28/flp0/490    | R01_cb13161_c28/flp0/490    | R01_cb13161_c28/flp0/490    | R01_cb13161_c28/flp0/490    | R01_cb13161_c28/flp0/490    |



|                             |                             |                             |                             |                             |
|-----------------------------|-----------------------------|-----------------------------|-----------------------------|-----------------------------|
| R01_cb1819_c1/flp0/2303     | NA                          | R01_cb1819_c1/flp0/2303     | NA                          | NA                          |
| R01_cb6405_c7/flp0/2728     | NA                          | R01_cb6405_c7/flp0/2728     | NA                          | NA                          |
| R01_cb11653_c0/flp0/1890    | NA                          | R01_cb11653_c0/flp0/1890    | NA                          | NA                          |
| R01_cb12240_c11/flp0/551    | R01_cb12240_c11/flp0/551    | R01_cb12240_c11/flp0/551    | NA                          | NA                          |
| R01_cb18281_c0/flp0/1295    | NA                          | NA                          | NA                          | R01_cb18281_c0/flp0/1295    |
| R01_cb8564_c631/f4p0/2066   | NA                          | NA                          | NA                          | R01_cb8564_c631/f4p0/2066   |
| R01_cb16613_c0/flp0/1050    | NA                          | NA                          | NA                          | R01_cb16613_c0/flp0/1050    |
| R01_cb17363_c5/flp1/661     | R01_cb17363_c5/flp1/661     | R01_cb17363_c5/flp1/661     | R01_cb17363_c5/flp1/661     | R01_cb17363_c5/flp1/661     |
| R01_cb1388_c13/flp0/4064    | NA                          | NA                          | NA                          | R01_cb1388_c13/flp0/4064    |
| R01_cb8285_c4/flp0/1361     | NA                          | NA                          | NA                          | R01_cb8285_c4/flp0/1361     |
| R01_cb8564_c81854/flp0/2013 | R01_cb8564_c81854/flp0/2013 | R01_cb8564_c81854/flp0/2013 | R01_cb8564_c81854/flp0/2013 | NA                          |
| R01_cb1398_c14/flp0/1993    | NA                          | R01_cb1398_c14/flp0/1993    | R01_cb1398_c14/flp0/1993    | NA                          |
| R01_cb11855_c0/f4p0/575     | R01_cb11855_c0/f4p0/575     | R01_cb11855_c0/f4p0/575     | NA                          | NA                          |
| R01_cb10031_c5/flp0/3145    | NA                          | R01_cb10031_c5/flp0/3145    | NA                          | R01_cb10031_c5/flp0/3145    |
| R01_cb3757_c0/flp0/3534     | NA                          | NA                          | NA                          | R01_cb3757_c0/flp0/3534     |
| R01_cb8564_c15978/flp0/3844 | NA                          | R01_cb8564_c15978/flp0/3844 | NA                          | NA                          |
| R01_cb416_c58/flp0/2505     | NA                          | R01_cb416_c58/flp0/2505     | NA                          | R01_cb416_c58/flp0/2505     |
| R01_cb1023_c3/flp0/1479     | NA                          | R01_cb1023_c3/flp0/1479     | NA                          | NA                          |
| R01_cb8564_c86424/flp0/2025 | R01_cb8564_c86424/flp0/2025 | R01_cb8564_c86424/flp0/2025 | R01_cb8564_c86424/flp0/2025 | R01_cb8564_c86424/flp0/2025 |
| R01_cb16942_c0/f2p0/603     | NA                          | R01_cb16942_c0/f2p0/603     | R01_cb16942_c0/f2p0/603     | R01_cb16942_c0/f2p0/603     |
| R01_cb5021_c0/f4p0/1500     | NA                          | NA                          | NA                          | R01_cb5021_c0/f4p0/1500     |
| R01_cb10534_c0/f3p0/919     | NA                          | R01_cb10534_c0/f3p0/919     | R01_cb10534_c0/f3p0/919     | R01_cb10534_c0/f3p0/919     |
| R01_cb8603_c1/flp0/3454     | NA                          | R01_cb8603_c1/flp0/3454     | NA                          | NA                          |
| R01_cb7954_c3/flp0/996      | NA                          | NA                          | NA                          | R01_cb7954_c3/flp0/996      |

|                             |                             |                             |                          |                             |
|-----------------------------|-----------------------------|-----------------------------|--------------------------|-----------------------------|
| R01_cb14070_c0/flp0/1393    | NA                          | R01_cb14070_c0/flp0/1393    | R01_cb14070_c0/flp0/1393 | R01_cb14070_c0/flp0/1393    |
| R01_cb18346_c1/flp0/889     | R01_cb18346_c1/flp0/889     | R01_cb18346_c1/flp0/889     | R01_cb18346_c1/flp0/889  | NA                          |
| R01_cb14409_c2/flp0/1807    | NA                          | R01_cb14409_c2/flp0/1807    | R01_cb14409_c2/flp0/1807 | R01_cb14409_c2/flp0/1807    |
| R01_cb16003_c4/flp0/1712    | NA                          | NA                          | NA                       | R01_cb16003_c4/flp0/1712    |
| R01_cb15904_c1/flp0/607     | NA                          | R01_cb15904_c1/flp0/607     | R01_cb15904_c1/flp0/607  | R01_cb15904_c1/flp0/607     |
| R01_cb5855_c1/flp0/2909     | NA                          | R01_cb5855_c1/flp0/2909     | NA                       | NA                          |
| R01_cb2049_c6/flp0/7394     | NA                          | R01_cb2049_c6/flp0/7394     | NA                       | NA                          |
| R01_cb5935_c6/flp0/937      | NA                          | R01_cb5935_c6/flp0/937      | NA                       | NA                          |
| R01_cb16664_c4/flp0/575     | NA                          | NA                          | NA                       | R01_cb16664_c4/flp0/575     |
| R01_cb16370_c0/flp0/478     | NA                          | R01_cb16370_c0/flp0/478     | NA                       | R01_cb16370_c0/flp0/478     |
| R01_cb2845_c9/flp0/3409     | NA                          | NA                          | NA                       | R01_cb2845_c9/flp0/3409     |
| R01_cb12329_c26/f4p2/1461   | NA                          | NA                          | NA                       | R01_cb12329_c26/f4p2/1461   |
| R01_cb8564_c50347/flp0/3158 | NA                          | R01_cb8564_c50347/flp0/3158 | NA                       | R01_cb8564_c50347/flp0/3158 |
| R01_cb4524_c5/flp0/3116     | NA                          | R01_cb4524_c5/flp0/3116     | NA                       | NA                          |
| R01_cb15418_c4/flp1/780     | NA                          | NA                          | NA                       | R01_cb15418_c4/flp1/780     |
| R01_cb8564_c1543/flp0/2375  | NA                          | NA                          | NA                       | R01_cb8564_c1543/flp0/2375  |
| R01_cb17052_c2/flp0/1584    | NA                          | R01_cb17052_c2/flp0/1584    | NA                       | R01_cb17052_c2/flp0/1584    |
| R01_cb18456_c7596/flp0/1340 | R01_cb18456_c7596/flp0/1340 | R01_cb18456_c7596/flp0/1340 | NA                       | R01_cb18456_c7596/flp0/1340 |
| R01_cb8722_c0/flp0/2289     | NA                          | R01_cb8722_c0/flp0/2289     | NA                       | NA                          |
| R01_cb1031_c0/flp0/4508     | NA                          | NA                          | NA                       | R01_cb1031_c0/flp0/4508     |
| R01_cb10558_c5/flp0/1007    | NA                          | NA                          | NA                       | R01_cb10558_c5/flp0/1007    |
| R01_cb15069_c7/f4p0/505     | NA                          | R01_cb15069_c7/f4p0/505     | NA                       | NA                          |
| R01_cb7598_c0/flp0/2576     | NA                          | R01_cb7598_c0/flp0/2576     | R01_cb7598_c0/flp0/2576  | R01_cb7598_c0/flp0/2576     |
| R01_cb13027_c2/flp0/975     | NA                          | NA                          | NA                       | R01_cb13027_c2/flp0/975     |
| R01_cb4000_c1/flp0/2545     | R01_cb4000_c1/flp0/2545     | R01_cb4000_c1/flp0/2545     | NA                       | NA                          |

|                                  |                          |                                  |                          |                                  |
|----------------------------------|--------------------------|----------------------------------|--------------------------|----------------------------------|
| R01_cb13059_c3/flp0/1353         | NA                       | R01_cb13059_c3/flp0/1353         | NA                       | NA                               |
| R01_cb15564_c2/flp0/928          | NA                       | R01_cb15564_c2/flp0/928          | R01_cb15564_c2/flp0/928  | R01_cb15564_c2/flp0/928          |
| R01_cb14805_c0/f7p0/623          | NA                       | R01_cb14805_c0/f7p0/623          | NA                       | NA                               |
| R01_cb2022_c0/fl2p0/2116         | NA                       | NA                               | NA                       | R01_cb2022_c0/fl2p0/2116         |
| R01_cb9646_c4/flp0/1827          | NA                       | NA                               | NA                       | R01_cb9646_c4/flp0/1827          |
| R01_cb9922_c0/flp0/1925          | NA                       | NA                               | NA                       | R01_cb9922_c0/flp0/1925          |
| R01_cb8564_c111155/flp0/291<br>7 | NA                       | R01_cb8564_c111155/flp0/291<br>7 | NA                       | R01_cb8564_c111155/flp0/291<br>7 |
| R01_cb8564_c48905/flp0/2042      | NA                       | R01_cb8564_c48905/flp0/2042      | NA                       | R01_cb8564_c48905/flp0/2042      |
| R01_cb18456_c1508/f3p0/700       | NA                       | NA                               | NA                       | R01_cb18456_c1508/f3p0/700       |
| R01_cb7017_c2/flp0/2742          | NA                       | NA                               | R01_cb7017_c2/flp0/2742  | NA                               |
| R01_cb173_c25/flp0/2391          | NA                       | NA                               | NA                       | R01_cb173_c25/flp0/2391          |
| R01_cb12666_c2/flp1/703          | NA                       | R01_cb12666_c2/flp1/703          | NA                       | NA                               |
| R01_cb3575_c12/flp0/3408         | NA                       | NA                               | NA                       | R01_cb3575_c12/flp0/3408         |
| R01_cb10725_c1/flp0/2420         | NA                       | R01_cb10725_c1/flp0/2420         | R01_cb10725_c1/flp0/2420 | R01_cb10725_c1/flp0/2420         |
| R01_cb17_c23/flp0/6113           | NA                       | NA                               | NA                       | R01_cb17_c23/flp0/6113           |
| R01_cb3426_c18/flp1/3249         | NA                       | NA                               | NA                       | R01_cb3426_c18/flp1/3249         |
| R01_cb14079_c0/flp0/486          | NA                       | R01_cb14079_c0/flp0/486          | R01_cb14079_c0/flp0/486  | R01_cb14079_c0/flp0/486          |
| R01_cb261_c48/flp1/2183          | NA                       | R01_cb261_c48/flp1/2183          | NA                       | NA                               |
| R01_cb12445_c0/f8p0/988          | NA                       | R01_cb12445_c0/f8p0/988          | NA                       | NA                               |
| R01_cb12963_c1/f3p0/1289         | NA                       | NA                               | NA                       | R01_cb12963_c1/f3p0/1289         |
| R01_cb7506_c4/flp0/3483          | NA                       | NA                               | NA                       | R01_cb7506_c4/flp0/3483          |
| R01_cb13681_c4/flp0/979          | NA                       | NA                               | R01_cb13681_c4/flp0/979  | R01_cb13681_c4/flp0/979          |
| R01_cb15383_c0/f2p1/577          | NA                       | R01_cb15383_c0/f2p1/577          | NA                       | NA                               |
| R01_cb17335_c1/flp0/892          | NA                       | R01_cb17335_c1/flp0/892          | R01_cb17335_c1/flp0/892  | R01_cb17335_c1/flp0/892          |
| R01_cb17268_c1/flp0/1100         | R01_cb17268_c1/flp0/1100 | R01_cb17268_c1/flp0/1100         | NA                       | NA                               |

|                              |                          |                              |                              |                              |
|------------------------------|--------------------------|------------------------------|------------------------------|------------------------------|
| R01_cb10217_c5/flp3/1772     | NA                       | NA                           | NA                           | R01_cb10217_c5/flp3/1772     |
| R01_cb10226_c3/flp0/732      | NA                       | R01_cb10226_c3/flp0/732      | R01_cb10226_c3/flp0/732      | R01_cb10226_c3/flp0/732      |
| R01_cb8564_c36482/flp0/2839  | NA                       | R01_cb8564_c36482/flp0/2839  | NA                           | R01_cb8564_c36482/flp0/2839  |
| R01_cb10378_c4/flp0/564      | NA                       | R01_cb10378_c4/flp0/564      | NA                           | R01_cb10378_c4/flp0/564      |
| R01_cb4584_c2/f4p0/3284      | NA                       | NA                           | NA                           | R01_cb4584_c2/f4p0/3284      |
| R01_cb280_c73/flp0/4006      | NA                       | R01_cb280_c73/flp0/4006      | NA                           | NA                           |
| R01_cb13809_c2/flp0/1672     | R01_cb13809_c2/flp0/1672 | R01_cb13809_c2/flp0/1672     | R01_cb13809_c2/flp0/1672     | R01_cb13809_c2/flp0/1672     |
| R01_cb13602_c27/flp0/1665    | NA                       | R01_cb13602_c27/flp0/1665    | NA                           | NA                           |
| R01_cb4030_c2/flp0/2488      | NA                       | NA                           | NA                           | R01_cb4030_c2/flp0/2488      |
| R01_cb9846_c0/flp0/1944      | NA                       | R01_cb9846_c0/flp0/1944      | R01_cb9846_c0/flp0/1944      | R01_cb9846_c0/flp0/1944      |
| R01_cb11168_c0/f3p0/644      | NA                       | R01_cb11168_c0/f3p0/644      | R01_cb11168_c0/f3p0/644      | R01_cb11168_c0/f3p0/644      |
| R01_cb7789_c2/flp0/2538      | NA                       | R01_cb7789_c2/flp0/2538      | NA                           | NA                           |
| R01_cb8564_c113131/flp0/2318 | NA                       | R01_cb8564_c113131/flp0/2318 | R01_cb8564_c113131/flp0/2318 | NA                           |
| R01_cb8564_c153873/flp6/4745 | NA                       | R01_cb8564_c153873/flp6/4745 | R01_cb8564_c153873/flp6/4745 | R01_cb8564_c153873/flp6/4745 |
| R01_cb3518_c3/flp0/3655      | NA                       | R01_cb3518_c3/flp0/3655      | NA                           | NA                           |
| R01_cb3121_c4/flp1/3640      | NA                       | R01_cb3121_c4/flp1/3640      | R01_cb3121_c4/flp1/3640      | NA                           |
| R01_cb16432_c0/flp0/493      | NA                       | R01_cb16432_c0/flp0/493      | NA                           | NA                           |
| R01_cb7533_c10/flp0/2160     | NA                       | NA                           | NA                           | R01_cb7533_c10/flp0/2160     |
| R01_cb10564_c1/flp0/3075     | R01_cb10564_c1/flp0/3075 | R01_cb10564_c1/flp0/3075     | NA                           | R01_cb10564_c1/flp0/3075     |
| R01_cb8564_c83630/flp0/2884  | NA                       | R01_cb8564_c83630/flp0/2884  | NA                           | R01_cb8564_c83630/flp0/2884  |
| R01_cb16100_c7/flp0/711      | R01_cb16100_c7/flp0/711  | NA                           | NA                           | NA                           |
| R01_cb15474_c4/flp0/1728     | NA                       | NA                           | NA                           | R01_cb15474_c4/flp0/1728     |
| R01_cb6662_c9/f5p0/1818      | NA                       | NA                           | NA                           | R01_cb6662_c9/f5p0/1818      |
| R01_cb18077_c1/flp0/361      | R01_cb18077_c1/flp0/361  | R01_cb18077_c1/flp0/361      | R01_cb18077_c1/flp0/361      | R01_cb18077_c1/flp0/361      |

|                             |                         |                             |                          |                             |
|-----------------------------|-------------------------|-----------------------------|--------------------------|-----------------------------|
| R01_cb12243_c0/flp0/1698    | NA                      | R01_cb12243_c0/flp0/1698    | NA                       | R01_cb12243_c0/flp0/1698    |
| R01_cb15825_c4/flp0/1179    | NA                      | NA                          | R01_cb15825_c4/flp0/1179 | R01_cb15825_c4/flp0/1179    |
| R01_cb9692_c1/flp0/1801     | NA                      | NA                          | NA                       | R01_cb9692_c1/flp0/1801     |
| R01_cb7836_c1/flp0/1931     | NA                      | R01_cb7836_c1/flp0/1931     | NA                       | R01_cb7836_c1/flp0/1931     |
| R01_cb7802_c10/flp0/1775    | NA                      | NA                          | NA                       | R01_cb7802_c10/flp0/1775    |
| R01_cb8564_c90587/flp0/3448 | NA                      | R01_cb8564_c90587/flp0/3448 | NA                       | NA                          |
| R01_cb13021_c3/flp0/417     | R01_cb13021_c3/flp0/417 | R01_cb13021_c3/flp0/417     | NA                       | NA                          |
| R01_cb8564_c10238/flp0/3068 | NA                      | R01_cb8564_c10238/flp0/3068 | NA                       | R01_cb8564_c10238/flp0/3068 |
| R01_cb4180_c0/flp0/3410     | NA                      | R01_cb4180_c0/flp0/3410     | NA                       | R01_cb4180_c0/flp0/3410     |
| R01_cb16521_c1/flp0/926     | NA                      | NA                          | NA                       | R01_cb16521_c1/flp0/926     |
| R01_cb8975_c11/flp0/340     | R01_cb8975_c11/flp0/340 | R01_cb8975_c11/flp0/340     | R01_cb8975_c11/flp0/340  | R01_cb8975_c11/flp0/340     |
| R01_cb1138_c53/flp1/1002    | NA                      | NA                          | R01_cb1138_c53/flp1/1002 | R01_cb1138_c53/flp1/1002    |
| R01_cb8564_c12898/flp0/3109 | NA                      | NA                          | NA                       | R01_cb8564_c12898/flp0/3109 |
| R01_cb13287_c11/f8p0/574    | NA                      | R01_cb13287_c11/f8p0/574    | NA                       | R01_cb13287_c11/f8p0/574    |
| R01_cb7345_c8/flp0/2440     | NA                      | R01_cb7345_c8/flp0/2440     | NA                       | NA                          |
| R01_cb13872_c4/flp0/1346    | NA                      | R01_cb13872_c4/flp0/1346    | NA                       | NA                          |
| R01_cb4548_c2/flp0/4653     | NA                      | R01_cb4548_c2/flp0/4653     | NA                       | NA                          |
| R01_cb1203_c14/flp0/4382    | NA                      | NA                          | NA                       | R01_cb1203_c14/flp0/4382    |
| R01_cb1860_c34/f3p4/2559    | NA                      | NA                          | NA                       | R01_cb1860_c34/f3p4/2559    |
| R01_cb4229_c4/flp0/2456     | NA                      | NA                          | NA                       | R01_cb4229_c4/flp0/2456     |
| R01_cb8564_c89855/flp0/2077 | NA                      | NA                          | NA                       | R01_cb8564_c89855/flp0/2077 |
| R01_cb17640_c0/f2p0/1240    | NA                      | NA                          | NA                       | R01_cb17640_c0/f2p0/1240    |
| R01_cb5983_c7/flp0/859      | NA                      | NA                          | NA                       | R01_cb5983_c7/flp0/859      |
| R01_cb625_c8/flp0/3111      | NA                      | NA                          | NA                       | R01_cb625_c8/flp0/3111      |
| R01_cb8564_c4199/flp0/2665  | NA                      | R01_cb8564_c4199/flp0/2665  | NA                       | NA                          |
| R01_cb8564_c23958/flp0/2286 | NA                      | NA                          | NA                       | R01_cb8564_c23958/flp0/2286 |

|                             |                          |                             |                             |                             |
|-----------------------------|--------------------------|-----------------------------|-----------------------------|-----------------------------|
| R01_cb14477_c4/flp0/1075    | NA                       | NA                          | NA                          | R01_cb14477_c4/flp0/1075    |
| R01_cb8564_c80230/flp0/3341 | NA                       | R01_cb8564_c80230/flp0/3341 | R01_cb8564_c80230/flp0/3341 | R01_cb8564_c80230/flp0/3341 |
| R01_cb2960_c4/flp0/2302     | NA                       | NA                          | NA                          | R01_cb2960_c4/flp0/2302     |
| R01_cb7579_c8/flp0/2343     | NA                       | NA                          | NA                          | R01_cb7579_c8/flp0/2343     |
| R01_cb11220_c0/flp0/1669    | NA                       | R01_cb11220_c0/flp0/1669    | NA                          | NA                          |
| R01_cb2382_c8/flp0/5285     | NA                       | NA                          | NA                          | R01_cb2382_c8/flp0/5285     |
| R01_cb14316_c9/flp0/1705    | R01_cb14316_c9/flp0/1705 | R01_cb14316_c9/flp0/1705    | R01_cb14316_c9/flp0/1705    | R01_cb14316_c9/flp0/1705    |
| R01_cb11718_c2/flp0/799     | NA                       | NA                          | NA                          | R01_cb11718_c2/flp0/799     |
| R01_cb4600_c5/flp2/2237     | NA                       | NA                          | NA                          | R01_cb4600_c5/flp2/2237     |
| R01_cb14316_c4/flp1/1084    | R01_cb14316_c4/flp1/1084 | R01_cb14316_c4/flp1/1084    | R01_cb14316_c4/flp1/1084    | R01_cb14316_c4/flp1/1084    |
| R01_cb17358_c2/flp0/1362    | NA                       | NA                          | NA                          | R01_cb17358_c2/flp0/1362    |
| R01_cb2352_c12/flp0/1756    | NA                       | R01_cb2352_c12/flp0/1756    | R01_cb2352_c12/flp0/1756    | R01_cb2352_c12/flp0/1756    |
| R01_cb17955_c0/flp0/1007    | NA                       | R01_cb17955_c0/flp0/1007    | R01_cb17955_c0/flp0/1007    | R01_cb17955_c0/flp0/1007    |
| R01_cb8564_c24246/flp0/3791 | NA                       | R01_cb8564_c24246/flp0/3791 | NA                          | R01_cb8564_c24246/flp0/3791 |
| R01_cb13037_c1/flp0/1236    | NA                       | NA                          | R01_cb13037_c1/flp0/1236    | R01_cb13037_c1/flp0/1236    |
| R01_cb8073_c4/flp0/3283     | NA                       | R01_cb8073_c4/flp0/3283     | NA                          | NA                          |
| R01_cb2182_c6/flp0/2121     | NA                       | R01_cb2182_c6/flp0/2121     | NA                          | R01_cb2182_c6/flp0/2121     |
| R01_cb7450_c1/flp0/2612     | NA                       | R01_cb7450_c1/flp0/2612     | NA                          | NA                          |
| R01_cb8564_c16796/flp0/3587 | NA                       | NA                          | R01_cb8564_c16796/flp0/3587 | R01_cb8564_c16796/flp0/3587 |
| R01_cb5482_c11/flp0/2785    | NA                       | R01_cb5482_c11/flp0/2785    | NA                          | NA                          |
| R01_cb1378_c5/flp0/2898     | NA                       | R01_cb1378_c5/flp0/2898     | NA                          | NA                          |
| R01_cb4182_c3/flp0/3446     | NA                       | R01_cb4182_c3/flp0/3446     | NA                          | NA                          |
| R01_cb7303_c13/flp0/2572    | NA                       | NA                          | NA                          | R01_cb7303_c13/flp0/2572    |
| R01_cb8564_c10634/flp0/3176 | NA                       | NA                          | NA                          | R01_cb8564_c10634/flp0/3176 |
| R01_cb3941_c23/flp0/3486    | NA                       | NA                          | NA                          | R01_cb3941_c23/flp0/3486    |
| R01_cb14576_c6/flp0/999     | NA                       | NA                          | R01_cb14576_c6/flp0/999     | R01_cb14576_c6/flp0/999     |

|                             |                             |                             |                             |                             |
|-----------------------------|-----------------------------|-----------------------------|-----------------------------|-----------------------------|
| R01_cb8564_c4105/flp0/2220  | NA                          | R01_cb8564_c4105/flp0/2220  | NA                          | NA                          |
| R01_cb6893_c2/flp0/2744     | NA                          | R01_cb6893_c2/flp0/2744     | NA                          | R01_cb6893_c2/flp0/2744     |
| R01_cb5258_c0/f3p0/1031     | NA                          | NA                          | NA                          | R01_cb5258_c0/f3p0/1031     |
| R01_cb14444_c2/flp0/1612    | NA                          | R01_cb14444_c2/flp0/1612    | R01_cb14444_c2/flp0/1612    | R01_cb14444_c2/flp0/1612    |
| R01_cb5995_c10/flp0/2599    | R01_cb5995_c10/flp0/2599    | R01_cb5995_c10/flp0/2599    | NA                          | NA                          |
| R01_cb12785_c32/fl3p0/989   | NA                          | R01_cb12785_c32/fl3p0/989   | R01_cb12785_c32/fl3p0/989   | R01_cb12785_c32/fl3p0/989   |
| R01_cb2311_c3/flp0/3980     | NA                          | NA                          | NA                          | R01_cb2311_c3/flp0/3980     |
| R01_cb8564_c75195/flp0/2825 | NA                          | NA                          | R01_cb8564_c75195/flp0/2825 | R01_cb8564_c75195/flp0/2825 |
| R01_cb13565_c68/flp0/1697   | NA                          | R01_cb13565_c68/flp0/1697   | NA                          | NA                          |
| R01_cb9612_c2/flp0/2534     | NA                          | R01_cb9612_c2/flp0/2534     | NA                          | R01_cb9612_c2/flp0/2534     |
| R01_cb6636_c0/flp0/2802     | NA                          | R01_cb6636_c0/flp0/2802     | R01_cb6636_c0/flp0/2802     | R01_cb6636_c0/flp0/2802     |
| R01_cb4972_c25/flp0/3382    | NA                          | R01_cb4972_c25/flp0/3382    | NA                          | NA                          |
| R01_cb10481_c6/flp0/430     | R01_cb10481_c6/flp0/430     | R01_cb10481_c6/flp0/430     | R01_cb10481_c6/flp0/430     | R01_cb10481_c6/flp0/430     |
| R01_cb8564_c51860/flp0/2747 | R01_cb8564_c51860/flp0/2747 | R01_cb8564_c51860/flp0/2747 | R01_cb8564_c51860/flp0/2747 | R01_cb8564_c51860/flp0/2747 |
| R01_cb8564_c86805/flp0/3202 | NA                          | R01_cb8564_c86805/flp0/3202 | NA                          | NA                          |
| R01_cb9101_c1/flp0/2193     | NA                          | R01_cb9101_c1/flp0/2193     | NA                          | NA                          |
| R01_cb8564_c19822/flp0/3534 | NA                          | R01_cb8564_c19822/flp0/3534 | NA                          | NA                          |
| R01_cb12776_c1/flp0/1435    | NA                          | NA                          | NA                          | R01_cb12776_c1/flp0/1435    |
| R01_cb5287_c0/f2p0/2885     | NA                          | R01_cb5287_c0/f2p0/2885     | NA                          | NA                          |
| R01_cb8564_c1990/flp0/2615  | NA                          | R01_cb8564_c1990/flp0/2615  | R01_cb8564_c1990/flp0/2615  | R01_cb8564_c1990/flp0/2615  |
| R01_cb8564_c70289/flp1/2295 | NA                          | R01_cb8564_c70289/flp1/2295 | NA                          | R01_cb8564_c70289/flp1/2295 |
| R01_cb18310_c1/flp0/1530    | NA                          | NA                          | NA                          | R01_cb18310_c1/flp0/1530    |
| R01_cb8564_c45922/flp0/3553 | NA                          | NA                          | NA                          | R01_cb8564_c45922/flp0/3553 |
| R01_cb13485_c5/flp0/627     | NA                          | R01_cb13485_c5/flp0/627     | NA                          | NA                          |
| R01_cb18409_c26/f2p0/365    | NA                          | R01_cb18409_c26/f2p0/365    | R01_cb18409_c26/f2p0/365    | R01_cb18409_c26/f2p0/365    |

|                              |                          |                              |                              |                              |
|------------------------------|--------------------------|------------------------------|------------------------------|------------------------------|
| R01_cb16262_c2/flp0/302      | R01_cb16262_c2/flp0/302  | R01_cb16262_c2/flp0/302      | R01_cb16262_c2/flp0/302      | R01_cb16262_c2/flp0/302      |
| R01_cb8564_c91441/flp0/3028  | NA                       | NA                           | NA                           | R01_cb8564_c91441/flp0/3028  |
| R01_cb15778_c3/flp0/1005     | NA                       | NA                           | NA                           | R01_cb15778_c3/flp0/1005     |
| R01_cb2779_c5/flp0/1790      | NA                       | NA                           | NA                           | R01_cb2779_c5/flp0/1790      |
| R01_cb5297_c6/flp0/974       | NA                       | R01_cb5297_c6/flp0/974       | NA                           | NA                           |
| R01_cb8751_c5/flp0/2014      | NA                       | NA                           | NA                           | R01_cb8751_c5/flp0/2014      |
| R01_cb13545_c54/flp0/961     | NA                       | R01_cb13545_c54/flp0/961     | NA                           | R01_cb13545_c54/flp0/961     |
| R01_cb13490_c7/flp0/867      | R01_cb13490_c7/flp0/867  | R01_cb13490_c7/flp0/867      | R01_cb13490_c7/flp0/867      | R01_cb13490_c7/flp0/867      |
| R01_cb10104_c4/flp0/1231     | NA                       | NA                           | NA                           | R01_cb10104_c4/flp0/1231     |
| R01_cb7035_c2/flp0/2020      | NA                       | R01_cb7035_c2/flp0/2020      | NA                           | NA                           |
| R01_cb8564_c157784/flp1/2430 | NA                       | R01_cb8564_c157784/flp1/2430 | NA                           | NA                           |
| R01_cb4269_c3/f2p0/2105      | NA                       | NA                           | NA                           | R01_cb4269_c3/f2p0/2105      |
| R01_cb11202_c1/flp0/3445     | R01_cb11202_c1/flp0/3445 | R01_cb11202_c1/flp0/3445     | NA                           | NA                           |
| R01_cb8564_c121885/flp0/2853 | NA                       | R01_cb8564_c121885/flp0/2853 | R01_cb8564_c121885/flp0/2853 | R01_cb8564_c121885/flp0/2853 |
| R01_cb5720_c4/flp0/2945      | NA                       | NA                           | NA                           | R01_cb5720_c4/flp0/2945      |
| R01_cb6870_c2/flp0/1399      | R01_cb6870_c2/flp0/1399  | NA                           | NA                           | NA                           |
| R01_cb14882_c5/flp0/1070     | NA                       | R01_cb14882_c5/flp0/1070     | R01_cb14882_c5/flp0/1070     | NA                           |
| R01_cb4233_c31/f3p0/2762     | NA                       | NA                           | R01_cb4233_c31/f3p0/2762     | R01_cb4233_c31/f3p0/2762     |
| R01_cb17053_c5/flp0/561      | R01_cb17053_c5/flp0/561  | R01_cb17053_c5/flp0/561      | R01_cb17053_c5/flp0/561      | R01_cb17053_c5/flp0/561      |
| R01_cb10054_c35/flp1/579     | NA                       | R01_cb10054_c35/flp1/579     | NA                           | R01_cb10054_c35/flp1/579     |
| R01_cb1095_c4/flp0/3876      | NA                       | NA                           | NA                           | R01_cb1095_c4/flp0/3876      |
| R01_cb10758_c3/flp0/1980     | NA                       | NA                           | NA                           | R01_cb10758_c3/flp0/1980     |
| R01_cb3426_c10/flp0/2226     | NA                       | NA                           | NA                           | R01_cb3426_c10/flp0/2226     |
| R01_cb4657_c13/flp0/2324     | NA                       | R01_cb4657_c13/flp0/2324     | R01_cb4657_c13/flp0/2324     | NA                           |



|                             |                             |                             |                             |                             |
|-----------------------------|-----------------------------|-----------------------------|-----------------------------|-----------------------------|
| R01_cb8564_c77153/f1p0/2697 | NA                          | R01_cb8564_c77153/f1p0/2697 | NA                          | NA                          |
| R01_cb8564_c122654/f1p0/379 | NA                          | R01_cb8564_c122654/f1p0/379 | NA                          | NA                          |
| 6                           |                             | 6                           |                             |                             |
| R01_cb6732_c24/f1p0/979     | NA                          | R01_cb6732_c24/f1p0/979     | NA                          | NA                          |
| R01_cb10077_c8/f1p1/1157    | NA                          | R01_cb10077_c8/f1p1/1157    | NA                          | NA                          |
| R01_cb8564_c1264/f1p0/2196  | NA                          | R01_cb8564_c1264/f1p0/2196  | NA                          | R01_cb8564_c1264/f1p0/2196  |
| R01_cb3483_c11/f1p0/2887    | NA                          | NA                          | NA                          | R01_cb3483_c11/f1p0/2887    |
| R01_cb2223_c4/f1p0/1184     | NA                          | NA                          | R01_cb2223_c4/f1p0/1184     | R01_cb2223_c4/f1p0/1184     |
| R01_cb8250_c0/f1p0/2424     | R01_cb8250_c0/f1p0/2424     | R01_cb8250_c0/f1p0/2424     | R01_cb8250_c0/f1p0/2424     | R01_cb8250_c0/f1p0/2424     |
| R01_cb6948_c2/f1p0/2724     | NA                          | R01_cb6948_c2/f1p0/2724     | NA                          | R01_cb6948_c2/f1p0/2724     |
| R01_cb14019_c0/f1p0/1520    | NA                          | R01_cb14019_c0/f1p0/1520    | R01_cb14019_c0/f1p0/1520    | R01_cb14019_c0/f1p0/1520    |
| R01_cb13463_c19/f10p1/1392  | NA                          | NA                          | NA                          | R01_cb13463_c19/f10p1/1392  |
| R01_cb17910_c1/f1p0/1156    | NA                          | R01_cb17910_c1/f1p0/1156    | NA                          | R01_cb17910_c1/f1p0/1156    |
| R01_cb2765_c4/f1p0/2896     | NA                          | NA                          | NA                          | R01_cb2765_c4/f1p0/2896     |
| R01_cb10687_c0/f4p0/1528    | NA                          | NA                          | NA                          | R01_cb10687_c0/f4p0/1528    |
| R01_cb5911_c0/f3p1/1643     | NA                          | NA                          | NA                          | R01_cb5911_c0/f3p1/1643     |
| R01_cb18456_c1820/f1p0/543  | NA                          | NA                          | NA                          | R01_cb18456_c1820/f1p0/543  |
| R01_cb8298_c5/f1p0/707      | R01_cb8298_c5/f1p0/707      | R01_cb8298_c5/f1p0/707      | R01_cb8298_c5/f1p0/707      | R01_cb8298_c5/f1p0/707      |
| R01_cb8564_c77543/f1p0/2600 | NA                          | R01_cb8564_c77543/f1p0/2600 | NA                          | R01_cb8564_c77543/f1p0/2600 |
| R01_cb8564_c89616/f1p0/2465 | NA                          | NA                          | NA                          | R01_cb8564_c89616/f1p0/2465 |
| R01_cb8564_c69453/f1p0/3058 | R01_cb8564_c69453/f1p0/3058 | R01_cb8564_c69453/f1p0/3058 | R01_cb8564_c69453/f1p0/3058 | R01_cb8564_c69453/f1p0/3058 |
| 8                           |                             |                             |                             |                             |
| R01_cb2378_c13/f1p1/3463    | NA                          | NA                          | NA                          | R01_cb2378_c13/f1p1/3463    |
| R01_cb8564_c107827/f2p0/211 | NA                          | R01_cb8564_c107827/f2p0/211 | R01_cb8564_c107827/f2p0/211 | R01_cb8564_c107827/f2p0/211 |
| 0                           |                             | 0                           | 0                           | 0                           |
| R01_cb5963_c1/f1p0/2966     | NA                          | R01_cb5963_c1/f1p0/2966     | NA                          | NA                          |

|                              |                             |                              |                             |                             |
|------------------------------|-----------------------------|------------------------------|-----------------------------|-----------------------------|
| R01_cb17904_c2/flp0/724      | R01_cb17904_c2/flp0/724     | R01_cb17904_c2/flp0/724      | R01_cb17904_c2/flp0/724     | R01_cb17904_c2/flp0/724     |
| R01_cb18456_c3695/flp0/1345  | NA                          | R01_cb18456_c3695/flp0/1345  | NA                          | R01_cb18456_c3695/flp0/1345 |
| R01_cb16617_c2/f2p0/1612     | NA                          | NA                           | NA                          | R01_cb16617_c2/f2p0/1612    |
| R01_cb17703_c1/flp0/713      | R01_cb17703_c1/flp0/713     | R01_cb17703_c1/flp0/713      | R01_cb17703_c1/flp0/713     | R01_cb17703_c1/flp0/713     |
| R01_cb12579_c2/f2p1/987      | R01_cb12579_c2/f2p1/987     | R01_cb12579_c2/f2p1/987      | R01_cb12579_c2/f2p1/987     | R01_cb12579_c2/f2p1/987     |
| R01_cb8564_c121924/flp0/2905 | NA                          | R01_cb8564_c121924/flp0/2905 | NA                          | NA                          |
| R01_cb5900_c73/flp0/3430     | NA                          | R01_cb5900_c73/flp0/3430     | NA                          | R01_cb5900_c73/flp0/3430    |
| R01_cb6523_c9/flp0/2498      | NA                          | NA                           | NA                          | R01_cb6523_c9/flp0/2498     |
| R01_cb6615_c10/flp0/2408     | NA                          | NA                           | NA                          | R01_cb6615_c10/flp0/2408    |
| R01_cb15760_c0/flp0/441      | R01_cb15760_c0/flp0/441     | R01_cb15760_c0/flp0/441      | R01_cb15760_c0/flp0/441     | R01_cb15760_c0/flp0/441     |
| R01_cb14107_c1/flp0/1327     | NA                          | NA                           | R01_cb14107_c1/flp0/1327    | R01_cb14107_c1/flp0/1327    |
| R01_cb6874_c4/flp0/2343      | NA                          | NA                           | NA                          | R01_cb6874_c4/flp0/2343     |
| R01_cb13914_c7/flp0/753      | NA                          | R01_cb13914_c7/flp0/753      | NA                          | R01_cb13914_c7/flp0/753     |
| R01_cb402_c24/flp1/3130      | NA                          | R01_cb402_c24/flp1/3130      | NA                          | R01_cb402_c24/flp1/3130     |
| R01_cb8279_c2/flp0/2382      | NA                          | R01_cb8279_c2/flp0/2382      | R01_cb8279_c2/flp0/2382     | R01_cb8279_c2/flp0/2382     |
| R01_cb11966_c10/flp0/1567    | R01_cb11966_c10/flp0/1567   | R01_cb11966_c10/flp0/1567    | NA                          | NA                          |
| R01_cb7810_c4/flp0/773       | R01_cb7810_c4/flp0/773      | R01_cb7810_c4/flp0/773       | R01_cb7810_c4/flp0/773      | NA                          |
| R01_cb14502_c15/flp0/1205    | NA                          | R01_cb14502_c15/flp0/1205    | NA                          | R01_cb14502_c15/flp0/1205   |
| R01_cb8564_c11345/flp1/2994  | NA                          | R01_cb8564_c11345/flp1/2994  | NA                          | NA                          |
| R01_cb18319_c1/flp0/1509     | NA                          | NA                           | NA                          | R01_cb18319_c1/flp0/1509    |
| R01_cb2141_c1/flp0/1910      | R01_cb2141_c1/flp0/1910     | R01_cb2141_c1/flp0/1910      | R01_cb2141_c1/flp0/1910     | R01_cb2141_c1/flp0/1910     |
| R01_cb1488_c4/flp0/2489      | NA                          | R01_cb1488_c4/flp0/2489      | NA                          | NA                          |
| R01_cb3699_c5/flp0/2467      | NA                          | R01_cb3699_c5/flp0/2467      | NA                          | NA                          |
| R01_cb17912_c1/flp0/1460     | NA                          | NA                           | R01_cb17912_c1/flp0/1460    | NA                          |
| R01_cb8564_c79053/flp0/3219  | R01_cb8564_c79053/flp0/3219 | R01_cb8564_c79053/flp0/3219  | R01_cb8564_c79053/flp0/3219 | R01_cb8564_c79053/flp0/3219 |

|                              |                              |                              |                              |                              |
|------------------------------|------------------------------|------------------------------|------------------------------|------------------------------|
|                              | 9                            |                              |                              |                              |
| R01_cb8564_c120809/f2p0/2596 | R01_cb8564_c120809/f2p0/2596 | R01_cb8564_c120809/f2p0/2596 | R01_cb8564_c120809/f2p0/2596 | R01_cb8564_c120809/f2p0/2596 |
| R01_cb4603_c3/f1p0/2973      | NA                           | R01_cb4603_c3/f1p0/2973      | NA                           | R01_cb4603_c3/f1p0/2973      |
| R01_cb10711_c2/f1p0/1004     | NA                           | R01_cb10711_c2/f1p0/1004     | NA                           | NA                           |
| R01_cb10310_c4/f1p1/1855     | NA                           | NA                           | NA                           | R01_cb10310_c4/f1p1/1855     |
| R01_cb8564_c45015/f1p0/2577  | R01_cb8564_c45015/f1p0/2577  | R01_cb8564_c45015/f1p0/2577  | NA                           | NA                           |
| R01_cb8564_c48083/f1p0/3187  | NA                           | R01_cb8564_c48083/f1p0/3187  | NA                           | NA                           |
| R01_cb18456_c4795/f1p0/515   | NA                           | NA                           | NA                           | R01_cb18456_c4795/f1p0/515   |
| R01_cb6028_c3/f1p0/2608      | NA                           | R01_cb6028_c3/f1p0/2608      | NA                           | NA                           |
| R01_cb8564_c75436/f1p0/3300  | NA                           | R01_cb8564_c75436/f1p0/3300  | NA                           | NA                           |
| R01_cb5165_c5/f1p0/2592      | NA                           | R01_cb5165_c5/f1p0/2592      | NA                           | NA                           |
| R01_cb16958_c2/f1p0/1491     | NA                           | NA                           | NA                           | R01_cb16958_c2/f1p0/1491     |
| R01_cb8564_c47861/f1p0/2233  | R01_cb8564_c47861/f1p0/2233  | R01_cb8564_c47861/f1p0/2233  | R01_cb8564_c47861/f1p0/2233  | R01_cb8564_c47861/f1p0/2233  |
| R01_cb1894_c8/f1p0/1469      | NA                           | NA                           | NA                           | R01_cb1894_c8/f1p0/1469      |
| R01_cb8564_c74430/f1p0/2728  | NA                           | R01_cb8564_c74430/f1p0/2728  | NA                           | NA                           |
| R01_cb8564_c15127/f1p0/4930  | NA                           | R01_cb8564_c15127/f1p0/4930  | NA                           | R01_cb8564_c15127/f1p0/4930  |
| R01_cb16598_c1/f1p0/737      | R01_cb16598_c1/f1p0/737      | R01_cb16598_c1/f1p0/737      | R01_cb16598_c1/f1p0/737      | R01_cb16598_c1/f1p0/737      |
| R01_cb7548_c20/f1p0/2052     | NA                           | R01_cb7548_c20/f1p0/2052     | NA                           | NA                           |
| R01_cb10226_c0/f1p0/762      | NA                           | R01_cb10226_c0/f1p0/762      | R01_cb10226_c0/f1p0/762      | R01_cb10226_c0/f1p0/762      |
| R01_cb3929_c6/f1p0/1893      | NA                           | R01_cb3929_c6/f1p0/1893      | NA                           | NA                           |
| R01_cb4627_c2/f1p0/2517      | NA                           | NA                           | NA                           | R01_cb4627_c2/f1p0/2517      |
| R01_cb11126_c2/f1p0/664      | NA                           | R01_cb11126_c2/f1p0/664      | NA                           | NA                           |
| R01_cb14228_c14/f4p1/682     | NA                           | NA                           | NA                           | R01_cb14228_c14/f4p1/682     |

|                             |                             |                             |                             |                             |
|-----------------------------|-----------------------------|-----------------------------|-----------------------------|-----------------------------|
| R01_cb18081_c1/flp0/807     | NA                          | R01_cb18081_c1/flp0/807     | NA                          | NA                          |
| R01_cb12315_c2/flp0/902     | NA                          | R01_cb12315_c2/flp0/902     | NA                          | R01_cb12315_c2/flp0/902     |
| R01_cb8564_c24523/flp0/2612 | NA                          | R01_cb8564_c24523/flp0/2612 | NA                          | R01_cb8564_c24523/flp0/2612 |
| R01_cb8564_c5259/flp0/3208  | NA                          | R01_cb8564_c5259/flp0/3208  | NA                          | R01_cb8564_c5259/flp0/3208  |
| R01_cb17300_c0/flp1/941     | NA                          | NA                          | NA                          | R01_cb17300_c0/flp1/941     |
| R01_cb12003_c86/flp0/1356   | NA                          | R01_cb12003_c86/flp0/1356   | NA                          | NA                          |
| R01_cb2568_c2/flp0/4726     | NA                          | NA                          | R01_cb2568_c2/flp0/4726     | R01_cb2568_c2/flp0/4726     |
| R01_cb8564_c34938/flp0/4052 | R01_cb8564_c34938/flp0/4052 | R01_cb8564_c34938/flp0/4052 | R01_cb8564_c34938/flp0/4052 | R01_cb8564_c34938/flp0/4052 |
| R01_cb8564_c19247/flp0/4989 | NA                          | NA                          | R01_cb8564_c19247/flp0/4989 | NA                          |
| R01_cb14415_c0/f2p0/990     | NA                          | NA                          | NA                          | R01_cb14415_c0/f2p0/990     |
| R01_cb8564_c3780/flp0/2807  | NA                          | NA                          | NA                          | R01_cb8564_c3780/flp0/2807  |
| R01_cb8564_c1205/flp0/2486  | NA                          | R01_cb8564_c1205/flp0/2486  | NA                          | NA                          |
| R01_cb7742_c11/flp0/2033    | NA                          | R01_cb7742_c11/flp0/2033    | NA                          | NA                          |
| R01_cb7795_c1/f2p1/2486     | NA                          | NA                          | NA                          | R01_cb7795_c1/f2p1/2486     |
| R01_cb2229_c78/flp0/1470    | NA                          | NA                          | NA                          | R01_cb2229_c78/flp0/1470    |
| R01_cb2398_c0/f2p0/2375     | NA                          | NA                          | NA                          | R01_cb2398_c0/f2p0/2375     |
| R01_cb12577_c7/flp0/775     | NA                          | NA                          | NA                          | R01_cb12577_c7/flp0/775     |
| R01_cb7565_c1/flp0/2723     | NA                          | NA                          | R01_cb7565_c1/flp0/2723     | R01_cb7565_c1/flp0/2723     |
| R01_cb8926_c0/flp0/2232     | NA                          | R01_cb8926_c0/flp0/2232     | NA                          | R01_cb8926_c0/flp0/2232     |
| R01_cb14949_c3/flp0/1027    | NA                          | R01_cb14949_c3/flp0/1027    | NA                          | NA                          |
| R01_cb8564_c89643/flp0/2101 | NA                          | R01_cb8564_c89643/flp0/2101 | NA                          | R01_cb8564_c89643/flp0/2101 |
| R01_cb3874_c1/flp0/3050     | NA                          | R01_cb3874_c1/flp0/3050     | R01_cb3874_c1/flp0/3050     | R01_cb3874_c1/flp0/3050     |
| R01_cb8564_c15236/flp0/3360 | R01_cb8564_c15236/flp0/3360 | R01_cb8564_c15236/flp0/3360 | R01_cb8564_c15236/flp0/3360 | R01_cb8564_c15236/flp0/3360 |
| R01_cb12579_c8/flp0/539     | R01_cb12579_c8/flp0/539     | R01_cb12579_c8/flp0/539     | R01_cb12579_c8/flp0/539     | R01_cb12579_c8/flp0/539     |

|                             |                            |                             |                            |                             |
|-----------------------------|----------------------------|-----------------------------|----------------------------|-----------------------------|
| R01_cb14726_c0/flp0/1005    | NA                         | NA                          | NA                         | R01_cb14726_c0/flp0/1005    |
| R01_cb5896_c45/flp0/2541    | R01_cb5896_c45/flp0/2541   | R01_cb5896_c45/flp0/2541    | NA                         | R01_cb5896_c45/flp0/2541    |
| R01_cb6272_c6/flp2/2581     | NA                         | NA                          | NA                         | R01_cb6272_c6/flp2/2581     |
| R01_cb11473_c2/flp0/1478    | NA                         | NA                          | NA                         | R01_cb11473_c2/flp0/1478    |
| R01_cb1458_c1/flp0/4317     | NA                         | R01_cb1458_c1/flp0/4317     | NA                         | NA                          |
| R01_cb644_c12/flp0/1004     | NA                         | NA                          | NA                         | R01_cb644_c12/flp0/1004     |
| R01_cb18595_c1/flp0/1656    | NA                         | NA                          | NA                         | R01_cb18595_c1/flp0/1656    |
| R01_cb1813_c10/flp0/2610    | NA                         | NA                          | NA                         | R01_cb1813_c10/flp0/2610    |
| R01_cb18456_c7227/flp0/608  | R01_cb18456_c7227/flp0/608 | R01_cb18456_c7227/flp0/608  | R01_cb18456_c7227/flp0/608 | R01_cb18456_c7227/flp0/608  |
| R01_cb646_c0/flp0/4686      | NA                         | NA                          | NA                         | R01_cb646_c0/flp0/4686      |
| R01_cb14322_c2/flp1/1273    | NA                         | R01_cb14322_c2/flp1/1273    | R01_cb14322_c2/flp1/1273   | R01_cb14322_c2/flp1/1273    |
| R01_cb3320_c6/flp0/3548     | NA                         | R01_cb3320_c6/flp0/3548     | NA                         | R01_cb3320_c6/flp0/3548     |
| R01_cb4836_c3/flp0/3245     | NA                         | NA                          | NA                         | R01_cb4836_c3/flp0/3245     |
| R01_cb5394_c0/f5p0/2782     | NA                         | NA                          | NA                         | R01_cb5394_c0/f5p0/2782     |
| R01_cb1856_c2/flp0/2572     | NA                         | R01_cb1856_c2/flp0/2572     | NA                         | R01_cb1856_c2/flp0/2572     |
| R01_cb18740_c1/flp1/821     | NA                         | R01_cb18740_c1/flp1/821     | NA                         | NA                          |
| R01_cb16981_c0/fl0p1/740    | NA                         | NA                          | NA                         | R01_cb16981_c0/fl0p1/740    |
| R01_cb8564_c68327/f5p0/4045 | NA                         | NA                          | NA                         | R01_cb8564_c68327/f5p0/4045 |
| R01_cb6969_c4/flp0/3739     | NA                         | R01_cb6969_c4/flp0/3739     | NA                         | NA                          |
| R01_cb13545_c44/flp0/601    | NA                         | R01_cb13545_c44/flp0/601    | R01_cb13545_c44/flp0/601   | R01_cb13545_c44/flp0/601    |
| R01_cb2806_c5/flp0/2104     | NA                         | NA                          | NA                         | R01_cb2806_c5/flp0/2104     |
| R01_cb8564_c86701/flp0/2895 | NA                         | R01_cb8564_c86701/flp0/2895 | NA                         | NA                          |
| R01_cb4981_c2/flp0/3208     | NA                         | R01_cb4981_c2/flp0/3208     | NA                         | R01_cb4981_c2/flp0/3208     |
| R01_cb17381_c8/flp0/525     | NA                         | R01_cb17381_c8/flp0/525     | NA                         | R01_cb17381_c8/flp0/525     |
| R01_cb8612_c1/flp0/2818     | R01_cb8612_c1/flp0/2818    | R01_cb8612_c1/flp0/2818     | R01_cb8612_c1/flp0/2818    | R01_cb8612_c1/flp0/2818     |
| R01_cb6874_c9/f2p0/2438     | NA                         | NA                          | NA                         | R01_cb6874_c9/f2p0/2438     |

|                             |                          |                             |                             |                             |
|-----------------------------|--------------------------|-----------------------------|-----------------------------|-----------------------------|
| R01_cb4603_c1/flp2/3272     | NA                       | R01_cb4603_c1/flp2/3272     | NA                          | R01_cb4603_c1/flp2/3272     |
| R01_cb11469_c1/flp0/2941    | NA                       | NA                          | NA                          | R01_cb11469_c1/flp0/2941    |
| R01_cb7876_c8/flp1/703      | NA                       | R01_cb7876_c8/flp1/703      | NA                          | NA                          |
| R01_cb18387_c1/flp0/351     | R01_cb18387_c1/flp0/351  | R01_cb18387_c1/flp0/351     | R01_cb18387_c1/flp0/351     | R01_cb18387_c1/flp0/351     |
| R01_cb17342_c1/flp0/499     | NA                       | R01_cb17342_c1/flp0/499     | NA                          | R01_cb17342_c1/flp0/499     |
| R01_cb11762_c1/flp0/2990    | NA                       | R01_cb11762_c1/flp0/2990    | NA                          | NA                          |
| R01_cb1228_c54/f4p0/2725    | NA                       | NA                          | NA                          | R01_cb1228_c54/f4p0/2725    |
| R01_cb16340_c0/f4p0/514     | R01_cb16340_c0/f4p0/514  | R01_cb16340_c0/f4p0/514     | R01_cb16340_c0/f4p0/514     | NA                          |
| R01_cb6729_c0/flp0/2776     | NA                       | NA                          | NA                          | R01_cb6729_c0/flp0/2776     |
| R01_cb10917_c3/flp0/974     | NA                       | R01_cb10917_c3/flp0/974     | NA                          | R01_cb10917_c3/flp0/974     |
| R01_cb8564_c78447/flp0/3003 | NA                       | R01_cb8564_c78447/flp0/3003 | NA                          | NA                          |
| R01_cb6530_c27/flp0/2468    | NA                       | R01_cb6530_c27/flp0/2468    | NA                          | NA                          |
| R01_cb6802_c83/flp0/2222    | NA                       | R01_cb6802_c83/flp0/2222    | NA                          | NA                          |
| R01_cb13045_c8/flp0/1304    | R01_cb13045_c8/flp0/1304 | R01_cb13045_c8/flp0/1304    | R01_cb13045_c8/flp0/1304    | R01_cb13045_c8/flp0/1304    |
| R01_cb8564_c46605/flp0/2240 | NA                       | NA                          | NA                          | R01_cb8564_c46605/flp0/2240 |
| R01_cb8564_c122187/flp0/321 | NA                       | R01_cb8564_c122187/flp0/321 | R01_cb8564_c122187/flp0/321 | R01_cb8564_c122187/flp0/321 |
| 6                           | NA                       | 6                           | 6                           | 6                           |
| R01_cb8564_c71605/flp0/1934 | NA                       | R01_cb8564_c71605/flp0/1934 | R01_cb8564_c71605/flp0/1934 | R01_cb8564_c71605/flp0/1934 |
| R01_cb8564_c2877/flp0/3298  | NA                       | NA                          | R01_cb8564_c2877/flp0/3298  | NA                          |
| R01_cb12587_c5/flp0/1700    | NA                       | NA                          | NA                          | R01_cb12587_c5/flp0/1700    |
| R01_cb2676_c0/f31p2/2795    | NA                       | NA                          | NA                          | R01_cb2676_c0/f31p2/2795    |
| R01_cb8564_c115494/flp0/354 | NA                       | NA                          | NA                          | R01_cb8564_c115494/flp0/354 |
| 8                           | NA                       | NA                          | NA                          | 8                           |
| R01_cb8174_c2/flp0/2443     | NA                       | R01_cb8174_c2/flp0/2443     | NA                          | NA                          |
| R01_cb18456_c5406/flp2/817  | NA                       | R01_cb18456_c5406/flp2/817  | NA                          | NA                          |
| R01_cb3808_c4/flp0/1543     | NA                       | NA                          | NA                          | R01_cb3808_c4/flp0/1543     |

|                             |                             |                             |                             |                             |
|-----------------------------|-----------------------------|-----------------------------|-----------------------------|-----------------------------|
| R01_cb16629_c2/flp0/780     | NA                          | R01_cb16629_c2/flp0/780     | NA                          | R01_cb16629_c2/flp0/780     |
| R01_cb11157_c1/flp0/3224    | NA                          | R01_cb11157_c1/flp0/3224    | NA                          | NA                          |
| R01_cb11401_c0/f3p1/783     | NA                          | NA                          | R01_cb11401_c0/f3p1/783     | R01_cb11401_c0/f3p1/783     |
| R01_cb105_c29/flp0/887      | NA                          | R01_cb105_c29/flp0/887      | R01_cb105_c29/flp0/887      | R01_cb105_c29/flp0/887      |
| R01_cb10034_c59/flp0/571    | NA                          | R01_cb10034_c59/flp0/571    | NA                          | NA                          |
| R01_cb2406_c1/flp0/3763     | NA                          | R01_cb2406_c1/flp0/3763     | NA                          | NA                          |
| R01_cb8564_c119292/flp0/447 | NA                          | R01_cb8564_c119292/flp0/447 | R01_cb8564_c119292/flp0/447 | R01_cb8564_c119292/flp0/447 |
| 8                           |                             | 8                           | 8                           | 8                           |
| R01_cb8946_c1/flp1/2231     | NA                          | NA                          | NA                          | R01_cb8946_c1/flp1/2231     |
| R01_cb17780_c1/flp0/484     | R01_cb17780_c1/flp0/484     | R01_cb17780_c1/flp0/484     | R01_cb17780_c1/flp0/484     | R01_cb17780_c1/flp0/484     |
| R01_cb18456_c1714/f2p0/404  | R01_cb18456_c1714/f2p0/404  | NA                          | R01_cb18456_c1714/f2p0/404  | R01_cb18456_c1714/f2p0/404  |
| R01_cb18456_c3319/flp0/572  | R01_cb18456_c3319/flp0/572  | R01_cb18456_c3319/flp0/572  | R01_cb18456_c3319/flp0/572  | NA                          |
| R01_cb13170_c2/flp0/565     | R01_cb13170_c2/flp0/565     | R01_cb13170_c2/flp0/565     | NA                          | R01_cb13170_c2/flp0/565     |
| R01_cb8564_c115281/f2p0/223 | NA                          | R01_cb8564_c115281/f2p0/223 | R01_cb8564_c115281/f2p0/223 | NA                          |
| 9                           |                             | 9                           | 9                           |                             |
| R01_cb11895_c2/flp0/1425    | NA                          | NA                          | NA                          | R01_cb11895_c2/flp0/1425    |
| R01_cb16616_c2/flp0/625     | NA                          | NA                          | R01_cb16616_c2/flp0/625     | NA                          |
| R01_cb17390_c0/flp0/833     | R01_cb17390_c0/flp0/833     | R01_cb17390_c0/flp0/833     | R01_cb17390_c0/flp0/833     | R01_cb17390_c0/flp0/833     |
| R01_cb8564_c72284/flp1/2943 | R01_cb8564_c72284/flp1/2943 | R01_cb8564_c72284/flp1/2943 | R01_cb8564_c72284/flp1/2943 | R01_cb8564_c72284/flp1/2943 |
|                             | 3                           |                             |                             |                             |
| R01_cb8564_c5001/f2p1/3690  | NA                          | R01_cb8564_c5001/f2p1/3690  | NA                          | NA                          |
| R01_cb5477_c0/flp0/3078     | NA                          | NA                          | NA                          | R01_cb5477_c0/flp0/3078     |
| R01_cb4935_c20/flp0/3089    | NA                          | NA                          | R01_cb4935_c20/flp0/3089    | R01_cb4935_c20/flp0/3089    |
| R01_cb2804_c150/flp0/2890   | NA                          | NA                          | R01_cb2804_c150/flp0/2890   | R01_cb2804_c150/flp0/2890   |
| R01_cb10272_c31/f7p1/1650   | NA                          | NA                          | NA                          | R01_cb10272_c31/f7p1/1650   |
| R01_cb8564_c24340/flp0/3304 | NA                          | R01_cb8564_c24340/flp0/3304 | NA                          | NA                          |

|                              |                            |                              |                            |                              |
|------------------------------|----------------------------|------------------------------|----------------------------|------------------------------|
| R01_cb10453_c6/flp0/1181     | NA                         | NA                           | R01_cb10453_c6/flp0/1181   | R01_cb10453_c6/flp0/1181     |
| R01_cb8564_c4498/flp0/2985   | NA                         | R01_cb8564_c4498/flp0/2985   | R01_cb8564_c4498/flp0/2985 | R01_cb8564_c4498/flp0/2985   |
| R01_cb17430_c2/flp0/830      | R01_cb17430_c2/flp0/830    | R01_cb17430_c2/flp0/830      | R01_cb17430_c2/flp0/830    | R01_cb17430_c2/flp0/830      |
| R01_cb6802_c21/flp0/2458     | R01_cb6802_c21/flp0/2458   | R01_cb6802_c21/flp0/2458     | NA                         | NA                           |
| R01_cb11258_c0/flp0/1546     | R01_cb11258_c0/flp0/1546   | R01_cb11258_c0/flp0/1546     | R01_cb11258_c0/flp0/1546   | R01_cb11258_c0/flp0/1546     |
| R01_cb10406_c0/flp0/575      | R01_cb10406_c0/flp0/575    | R01_cb10406_c0/flp0/575      | NA                         | NA                           |
| R01_cb3703_c3/flp0/2083      | NA                         | NA                           | NA                         | R01_cb3703_c3/flp0/2083      |
| R01_cb6086_c0/flp0/2939      | NA                         | R01_cb6086_c0/flp0/2939      | NA                         | R01_cb6086_c0/flp0/2939      |
| R01_cb8564_c34103/fl2p2/3309 | NA                         | NA                           | NA                         | R01_cb8564_c34103/fl2p2/3309 |
| R01_cb10668_c0/f8p0/647      | NA                         | R01_cb10668_c0/f8p0/647      | NA                         | NA                           |
| R01_cb10335_c2/f2p0/1857     | NA                         | NA                           | NA                         | R01_cb10335_c2/f2p0/1857     |
| R01_cb6701_c1/flp0/2672      | NA                         | R01_cb6701_c1/flp0/2672      | NA                         | R01_cb6701_c1/flp0/2672      |
| R01_cb3359_c25/flp0/3112     | NA                         | R01_cb3359_c25/flp0/3112     | NA                         | NA                           |
| R01_cb17065_c1/flp0/1136     | NA                         | R01_cb17065_c1/flp0/1136     | NA                         | R01_cb17065_c1/flp0/1136     |
| R01_cb2594_c1/flp0/2733      | NA                         | R01_cb2594_c1/flp0/2733      | NA                         | NA                           |
| R01_cb8564_c3689/flp0/2354   | R01_cb8564_c3689/flp0/2354 | R01_cb8564_c3689/flp0/2354   | R01_cb8564_c3689/flp0/2354 | R01_cb8564_c3689/flp0/2354   |
| R01_cb16443_c1/flp0/356      | R01_cb16443_c1/flp0/356    | R01_cb16443_c1/flp0/356      | R01_cb16443_c1/flp0/356    | R01_cb16443_c1/flp0/356      |
| R01_cb8564_c112458/flp0/2415 | NA                         | NA                           | NA                         | R01_cb8564_c112458/flp0/2415 |
| R01_cb10133_c5/flp0/1576     | NA                         | NA                           | NA                         | R01_cb10133_c5/flp0/1576     |
| R01_cb673_c5/flp0/815        | NA                         | R01_cb673_c5/flp0/815        | NA                         | R01_cb673_c5/flp0/815        |
| R01_cb6199_c22/flp0/2552     | NA                         | NA                           | NA                         | R01_cb6199_c22/flp0/2552     |
| R01_cb7985_c1/flp0/2489      | NA                         | R01_cb7985_c1/flp0/2489      | R01_cb7985_c1/flp0/2489    | NA                           |
| R01_cb8564_c112668/flp0/4604 | NA                         | R01_cb8564_c112668/flp0/4604 | NA                         | NA                           |



|                              |                          |                              |                             |                             |
|------------------------------|--------------------------|------------------------------|-----------------------------|-----------------------------|
| R01_cb12680_c14/flp0/1870    | NA                       | R01_cb12680_c14/flp0/1870    | NA                          | NA                          |
| R01_cb8564_c75611/flp0/3438  | NA                       | R01_cb8564_c75611/flp0/3438  | NA                          | NA                          |
| R01_cb18409_c54/flp0/1141    | NA                       | NA                           | NA                          | R01_cb18409_c54/flp0/1141   |
| R01_cb11433_c1/flp0/3176     | NA                       | NA                           | NA                          | R01_cb11433_c1/flp0/3176    |
| R01_cb12785_c36/flp0/1093    | NA                       | NA                           | R01_cb12785_c36/flp0/1093   | NA                          |
| R01_cb5229_c7/f2p1/1037      | NA                       | NA                           | NA                          | R01_cb5229_c7/f2p1/1037     |
| R01_cb14559_c5/flp0/1507     | NA                       | R01_cb14559_c5/flp0/1507     | NA                          | NA                          |
| R01_cb10074_c10/flp0/450     | R01_cb10074_c10/flp0/450 | R01_cb10074_c10/flp0/450     | R01_cb10074_c10/flp0/450    | R01_cb10074_c10/flp0/450    |
| R01_cb14661_c1/flp0/1501     | NA                       | R01_cb14661_c1/flp0/1501     | NA                          | NA                          |
| R01_cb8564_c21231/flp0/2328  | NA                       | R01_cb8564_c21231/flp0/2328  | NA                          | NA                          |
| R01_cb2253_c4/flp0/2680      | R01_cb2253_c4/flp0/2680  | R01_cb2253_c4/flp0/2680      | NA                          | NA                          |
| R01_cb18191_c0/flp0/1475     | NA                       | NA                           | NA                          | R01_cb18191_c0/flp0/1475    |
| R01_cb8564_c118417/flp1/3305 | NA                       | R01_cb8564_c118417/flp1/3305 | NA                          | NA                          |
| R01_cb6591_c9/flp0/645       | R01_cb6591_c9/flp0/645   | R01_cb6591_c9/flp0/645       | NA                          | NA                          |
| R01_cb8564_c21697/flp3/3741  | NA                       | NA                           | NA                          | R01_cb8564_c21697/flp3/3741 |
| R01_cb11879_c6/f3p0/1734     | NA                       | NA                           | NA                          | R01_cb11879_c6/f3p0/1734    |
| R01_cb8564_c44628/flp0/2828  | NA                       | R01_cb8564_c44628/flp0/2828  | R01_cb8564_c44628/flp0/2828 | NA                          |
| R01_cb4584_c3/f3p0/3070      | NA                       | NA                           | NA                          | R01_cb4584_c3/f3p0/3070     |
| R01_cb9318_c0/flp0/2116      | NA                       | NA                           | NA                          | R01_cb9318_c0/flp0/2116     |
| R01_cb9612_c3/flp0/1109      | NA                       | NA                           | NA                          | R01_cb9612_c3/flp0/1109     |
| R01_cb18735_c1/flp0/2075     | NA                       | R01_cb18735_c1/flp0/2075     | NA                          | NA                          |
| R01_cb11645_c1/flp0/2790     | NA                       | R01_cb11645_c1/flp0/2790     | NA                          | R01_cb11645_c1/flp0/2790    |
| R01_cb17779_c1/flp0/1874     | R01_cb17779_c1/flp0/1874 | R01_cb17779_c1/flp0/1874     | NA                          | NA                          |
| R01_cb18393_c0/flp0/1184     | R01_cb18393_c0/flp0/1184 | R01_cb18393_c0/flp0/1184     | R01_cb18393_c0/flp0/1184    | R01_cb18393_c0/flp0/1184    |
| R01_cb5207_c3/flp0/3203      | R01_cb5207_c3/flp0/3203  | R01_cb5207_c3/flp0/3203      | NA                          | NA                          |

|                             |                            |                             |                             |                             |
|-----------------------------|----------------------------|-----------------------------|-----------------------------|-----------------------------|
| R01_cb17655_c0/f7p0/538     | R01_cb17655_c0/f7p0/538    | R01_cb17655_c0/f7p0/538     | R01_cb17655_c0/f7p0/538     | R01_cb17655_c0/f7p0/538     |
| R01_cb9165_c2/f1p0/1120     | NA                         | R01_cb9165_c2/f1p0/1120     | NA                          | R01_cb9165_c2/f1p0/1120     |
| R01_cb16449_c0/f2p0/1558    | NA                         | NA                          | NA                          | R01_cb16449_c0/f2p0/1558    |
| R01_cb2494_c13/f1p0/954     | R01_cb2494_c13/f1p0/954    | R01_cb2494_c13/f1p0/954     | R01_cb2494_c13/f1p0/954     | R01_cb2494_c13/f1p0/954     |
| R01_cb12273_c7/f1p0/1595    | NA                         | NA                          | NA                          | R01_cb12273_c7/f1p0/1595    |
| R01_cb13982_c1/f2p0/1372    | NA                         | NA                          | NA                          | R01_cb13982_c1/f2p0/1372    |
| R01_cb12587_c3/f1p0/1762    | NA                         | NA                          | NA                          | R01_cb12587_c3/f1p0/1762    |
| R01_cb16779_c2/f1p0/519     | NA                         | R01_cb16779_c2/f1p0/519     | R01_cb16779_c2/f1p0/519     | R01_cb16779_c2/f1p0/519     |
| R01_cb12223_c2/f1p0/717     | NA                         | R01_cb12223_c2/f1p0/717     | R01_cb12223_c2/f1p0/717     | R01_cb12223_c2/f1p0/717     |
| R01_cb18456_c4792/f1p1/490  | NA                         | NA                          | NA                          | R01_cb18456_c4792/f1p1/490  |
| R01_cb3989_c2/f1p0/3310     | NA                         | NA                          | NA                          | R01_cb3989_c2/f1p0/3310     |
| R01_cb2729_c2/f1p0/4076     | NA                         | R01_cb2729_c2/f1p0/4076     | NA                          | R01_cb2729_c2/f1p0/4076     |
| R01_cb3000_c3/f1p0/1940     | NA                         | R01_cb3000_c3/f1p0/1940     | R01_cb3000_c3/f1p0/1940     | R01_cb3000_c3/f1p0/1940     |
| R01_cb18456_c7208/f1p0/480  | R01_cb18456_c7208/f1p0/480 | R01_cb18456_c7208/f1p0/480  | R01_cb18456_c7208/f1p0/480  | R01_cb18456_c7208/f1p0/480  |
| R01_cb18409_c80/f1p0/437    | R01_cb18409_c80/f1p0/437   | R01_cb18409_c80/f1p0/437    | R01_cb18409_c80/f1p0/437    | R01_cb18409_c80/f1p0/437    |
| R01_cb7954_c4/f1p0/838      | NA                         | NA                          | NA                          | R01_cb7954_c4/f1p0/838      |
| R01_cb9232_c0/f6p0/2143     | NA                         | NA                          | NA                          | R01_cb9232_c0/f6p0/2143     |
| R01_cb8564_c16989/f1p0/4696 | NA                         | R01_cb8564_c16989/f1p0/4696 | NA                          | NA                          |
| R01_cb16129_c6/f2p0/533     | NA                         | R01_cb16129_c6/f2p0/533     | NA                          | NA                          |
| R01_cb8564_c17664/f1p0/2753 | NA                         | R01_cb8564_c17664/f1p0/2753 | NA                          | R01_cb8564_c17664/f1p0/2753 |
| R01_cb5351_c3/f1p0/1587     | NA                         | NA                          | NA                          | R01_cb5351_c3/f1p0/1587     |
| R01_cb1658_c22/f1p0/2855    | NA                         | NA                          | NA                          | R01_cb1658_c22/f1p0/2855    |
| R01_cb12169_c3/f1p0/345     | R01_cb12169_c3/f1p0/345    | R01_cb12169_c3/f1p0/345     | R01_cb12169_c3/f1p0/345     | R01_cb12169_c3/f1p0/345     |
| R01_cb8564_c124936/f1p0/235 | NA                         | R01_cb8564_c124936/f1p0/235 | R01_cb8564_c124936/f1p0/235 | R01_cb8564_c124936/f1p0/235 |
| 6                           |                            | 6                           | 6                           | 6                           |
| R01_cb2796_c0/f2p0/3781     | R01_cb2796_c0/f2p0/3781    | R01_cb2796_c0/f2p0/3781     | NA                          | R01_cb2796_c0/f2p0/3781     |

|                              |                             |                              |                              |                              |
|------------------------------|-----------------------------|------------------------------|------------------------------|------------------------------|
| R01_cb1340_c1/flp0/4356      | NA                          | R01_cb1340_c1/flp0/4356      | NA                           | NA                           |
| R01_cb279_c9/flp0/4717       | NA                          | NA                           | NA                           | R01_cb279_c9/flp0/4717       |
| R01_cb16739_c2/f2p0/666      | NA                          | R01_cb16739_c2/f2p0/666      | NA                           | R01_cb16739_c2/f2p0/666      |
| R01_cb14550_c0/flp0/851      | R01_cb14550_c0/flp0/851     | R01_cb14550_c0/flp0/851      | R01_cb14550_c0/flp0/851      | R01_cb14550_c0/flp0/851      |
| R01_cb5896_c56/flp0/1933     | NA                          | NA                           | NA                           | R01_cb5896_c56/flp0/1933     |
| R01_cb18334_c0/flp0/1680     | NA                          | NA                           | NA                           | R01_cb18334_c0/flp0/1680     |
| R01_cb2027_c9/flp0/2753      | NA                          | R01_cb2027_c9/flp0/2753      | R01_cb2027_c9/flp0/2753      | R01_cb2027_c9/flp0/2753      |
| R01_cb13510_c10/flp0/651     | NA                          | R01_cb13510_c10/flp0/651     | NA                           | NA                           |
| R01_cb8564_c19896/flp0/2705  | R01_cb8564_c19896/flp0/2705 | R01_cb8564_c19896/flp0/2705  | R01_cb8564_c19896/flp0/2705  | R01_cb8564_c19896/flp0/2705  |
| R01_cb8564_c111745/flp0/241  | NA                          | R01_cb8564_c111745/flp0/241  | NA                           | R01_cb8564_c111745/flp0/241  |
| R01_cb535_c2/flp0/4696       | NA                          | NA                           | NA                           | R01_cb535_c2/flp0/4696       |
| R01_cb8564_c90005/flp0/3577  | R01_cb8564_c90005/flp0/3577 | R01_cb8564_c90005/flp0/3577  | NA                           | NA                           |
| R01_cb18158_c0/flp0/838      | NA                          | R01_cb18158_c0/flp0/838      | NA                           | NA                           |
| R01_cb8564_c117576/flp0/2529 | NA                          | R01_cb8564_c117576/flp0/2529 | R01_cb8564_c117576/flp0/2529 | R01_cb8564_c117576/flp0/2529 |
| R01_cb17381_c0/f7p1/774      | NA                          | NA                           | NA                           | R01_cb17381_c0/f7p1/774      |
| R01_cb4490_c7/flp0/3020      | NA                          | NA                           | R01_cb4490_c7/flp0/3020      | R01_cb4490_c7/flp0/3020      |
| R01_cb14566_c4/flp0/1308     | R01_cb14566_c4/flp0/1308    | R01_cb14566_c4/flp0/1308     | R01_cb14566_c4/flp0/1308     | R01_cb14566_c4/flp0/1308     |
| R01_cb2421_c0/flp0/3937      | NA                          | R01_cb2421_c0/flp0/3937      | R01_cb2421_c0/flp0/3937      | NA                           |
| R01_cb16662_c5/flp0/522      | R01_cb16662_c5/flp0/522     | R01_cb16662_c5/flp0/522      | R01_cb16662_c5/flp0/522      | R01_cb16662_c5/flp0/522      |
| R01_cb11212_c3/flp0/1743     | NA                          | R01_cb11212_c3/flp0/1743     | NA                           | NA                           |
| R01_cb5421_c10/flp0/1589     | NA                          | NA                           | R01_cb5421_c10/flp0/1589     | NA                           |
| R01_cb18222_c1/flp0/436      | NA                          | NA                           | NA                           | R01_cb18222_c1/flp0/436      |

|                              |                          |                            |                            |                              |
|------------------------------|--------------------------|----------------------------|----------------------------|------------------------------|
| R01_cb10077_c4/flp0/497      | NA                       | R01_cb10077_c4/flp0/497    | NA                         | NA                           |
| R01_cb363_c3/flp0/2498       | NA                       | R01_cb363_c3/flp0/2498     | NA                         | R01_cb363_c3/flp0/2498       |
| R01_cb7215_c1/flp0/4177      | NA                       | NA                         | NA                         | R01_cb7215_c1/flp0/4177      |
| R01_cb10786_c1/flp0/4511     | NA                       | R01_cb10786_c1/flp0/4511   | NA                         | NA                           |
| R01_cb10572_c0/f2p0/1145     | NA                       | NA                         | NA                         | R01_cb10572_c0/f2p0/1145     |
| R01_cb3888_c11/flp0/2128     | NA                       | R01_cb3888_c11/flp0/2128   | NA                         | NA                           |
| R01_cb18456_c5323/flp3/692   | NA                       | R01_cb18456_c5323/flp3/692 | NA                         | NA                           |
| R01_cb8564_c128807/flp0/3359 | NA                       | NA                         | NA                         | R01_cb8564_c128807/flp0/3359 |
| R01_cb2822_c5/flp0/2667      | R01_cb2822_c5/flp0/2667  | R01_cb2822_c5/flp0/2667    | NA                         | NA                           |
| R01_cb9119_c5/flp1/2109      | NA                       | NA                         | NA                         | R01_cb9119_c5/flp1/2109      |
| R01_cb8298_c6/flp0/575       | NA                       | R01_cb8298_c6/flp0/575     | R01_cb8298_c6/flp0/575     | R01_cb8298_c6/flp0/575       |
| R01_cb3704_c8/flp0/2187      | NA                       | R01_cb3704_c8/flp0/2187    | NA                         | NA                           |
| R01_cb14238_c0/f9p1/1255     | NA                       | NA                         | NA                         | R01_cb14238_c0/f9p1/1255     |
| R01_cb17266_c6/flp0/1869     | R01_cb17266_c6/flp0/1869 | R01_cb17266_c6/flp0/1869   | NA                         | R01_cb17266_c6/flp0/1869     |
| R01_cb8564_c2544/flp0/2597   | NA                       | NA                         | R01_cb8564_c2544/flp0/2597 | R01_cb8564_c2544/flp0/2597   |
| R01_cb4702_c19/flp0/2664     | NA                       | R01_cb4702_c19/flp0/2664   | NA                         | R01_cb4702_c19/flp0/2664     |
| R01_cb10525_c4/flp0/2020     | NA                       | R01_cb10525_c4/flp0/2020   | NA                         | NA                           |
| R01_cb17244_c0/f2p0/556      | R01_cb17244_c0/f2p0/556  | NA                         | R01_cb17244_c0/f2p0/556    | NA                           |
| R01_cb1623_c10/flp1/4018     | NA                       | R01_cb1623_c10/flp1/4018   | NA                         | NA                           |
| R01_cb7802_c6/flp0/2531      | NA                       | NA                         | NA                         | R01_cb7802_c6/flp0/2531      |
| R01_cb8564_c1334/f2p0/2671   | NA                       | NA                         | NA                         | R01_cb8564_c1334/f2p0/2671   |
| R01_cb3575_c11/flp0/3124     | NA                       | NA                         | NA                         | R01_cb3575_c11/flp0/3124     |
| R01_cb17593_c0/flp0/776      | NA                       | R01_cb17593_c0/flp0/776    | R01_cb17593_c0/flp0/776    | R01_cb17593_c0/flp0/776      |
| R01_cb3483_c21/flp0/2978     | NA                       | NA                         | NA                         | R01_cb3483_c21/flp0/2978     |
| R01_cb15811_c38/flp0/917     | R01_cb15811_c38/flp0/917 | R01_cb15811_c38/flp0/917   | R01_cb15811_c38/flp0/917   | R01_cb15811_c38/flp0/917     |

|                             |                             |                             |                             |                             |
|-----------------------------|-----------------------------|-----------------------------|-----------------------------|-----------------------------|
| R01_cb14997_c0/flp0/693     | NA                          | R01_cb14997_c0/flp0/693     | NA                          | NA                          |
| R01_cb7182_c28/flp0/2182    | NA                          | R01_cb7182_c28/flp0/2182    | NA                          | R01_cb7182_c28/flp0/2182    |
| R01_cb1119_c24/flp0/796     | R01_cb1119_c24/flp0/796     | NA                          | R01_cb1119_c24/flp0/796     | R01_cb1119_c24/flp0/796     |
| R01_cb4490_c3/flp0/3276     | NA                          | NA                          | R01_cb4490_c3/flp0/3276     | R01_cb4490_c3/flp0/3276     |
| R01_cb8564_c14828/flp0/3026 | NA                          | NA                          | NA                          | R01_cb8564_c14828/flp0/3026 |
| R01_cb4657_c18/flp0/2982    | NA                          | NA                          | NA                          | R01_cb4657_c18/flp0/2982    |
| R01_cb3307_c20/flp0/4338    | NA                          | R01_cb3307_c20/flp0/4338    | R01_cb3307_c20/flp0/4338    | NA                          |
| R01_cb7171_c13/flp0/2388    | NA                          | NA                          | NA                          | R01_cb7171_c13/flp0/2388    |
| R01_cb7530_c6/flp1/2464     | NA                          | R01_cb7530_c6/flp1/2464     | NA                          | R01_cb7530_c6/flp1/2464     |
| R01_cb9222_c12/flp0/2459    | NA                          | NA                          | NA                          | R01_cb9222_c12/flp0/2459    |
| R01_cb8564_c82071/flp0/3108 | R01_cb8564_c82071/flp0/3108 | R01_cb8564_c82071/flp0/3108 | NA                          | R01_cb8564_c82071/flp0/3108 |
| R01_cb3215_c20/flp1/2217    | R01_cb3215_c20/flp1/2217    | R01_cb3215_c20/flp1/2217    | NA                          | NA                          |
| R01_cb10567_c0/flp0/1210    | NA                          | R01_cb10567_c0/flp0/1210    | R01_cb10567_c0/flp0/1210    | R01_cb10567_c0/flp0/1210    |
| R01_cb3540_c3/flp0/4041     | NA                          | R01_cb3540_c3/flp0/4041     | NA                          | NA                          |
| R01_cb3732_c4/f2p0/2684     | NA                          | NA                          | NA                          | R01_cb3732_c4/f2p0/2684     |
| R01_cb8564_c89686/flp0/4796 | NA                          | R01_cb8564_c89686/flp0/4796 | NA                          | R01_cb8564_c89686/flp0/4796 |
| R01_cb950_c11/f2p1/4346     | NA                          | R01_cb950_c11/f2p1/4346     | R01_cb950_c11/f2p1/4346     | NA                          |
| R01_cb8564_c87060/flp0/1992 | NA                          | R01_cb8564_c87060/flp0/1992 | R01_cb8564_c87060/flp0/1992 | R01_cb8564_c87060/flp0/1992 |
| R01_cb14278_c2/f2p0/819     | R01_cb14278_c2/f2p0/819     | R01_cb14278_c2/f2p0/819     | R01_cb14278_c2/f2p0/819     | R01_cb14278_c2/f2p0/819     |
| R01_cb16162_c5/flp1/995     | NA                          | R01_cb16162_c5/flp1/995     | NA                          | NA                          |
| R01_cb4329_c9/flp2/1405     | NA                          | R01_cb4329_c9/flp2/1405     | NA                          | NA                          |
| R01_cb8564_c12139/flp4/3380 | NA                          | R01_cb8564_c12139/flp4/3380 | R01_cb8564_c12139/flp4/3380 | R01_cb8564_c12139/flp4/3380 |
| R01_cb10141_c11/flp0/974    | NA                          | R01_cb10141_c11/flp0/974    | NA                          | NA                          |
| R01_cb12757_c0/flp0/1044    | NA                          | NA                          | NA                          | R01_cb12757_c0/flp0/1044    |
| R01_cb13390_c15/flp0/1688   | NA                          | R01_cb13390_c15/flp0/1688   | NA                          | R01_cb13390_c15/flp0/1688   |

|                              |                            |                              |                          |                             |
|------------------------------|----------------------------|------------------------------|--------------------------|-----------------------------|
| R01_cb10903_c4/flp0/5094     | NA                         | R01_cb10903_c4/flp0/5094     | NA                       | R01_cb10903_c4/flp0/5094    |
| R01_cb859_c5/flp0/2869       | NA                         | NA                           | NA                       | R01_cb859_c5/flp0/2869      |
| R01_cb4471_c12/flp0/2778     | NA                         | NA                           | NA                       | R01_cb4471_c12/flp0/2778    |
| R01_cb18456_c6786/flp0/559   | R01_cb18456_c6786/flp0/559 | R01_cb18456_c6786/flp0/559   | NA                       | R01_cb18456_c6786/flp0/559  |
| R01_cb13532_c4/flp0/964      | R01_cb13532_c4/flp0/964    | NA                           | R01_cb13532_c4/flp0/964  | R01_cb13532_c4/flp0/964     |
| R01_cb8194_c1/flp0/2434      | NA                         | R01_cb8194_c1/flp0/2434      | NA                       | R01_cb8194_c1/flp0/2434     |
| R01_cb17997_c2/f2p0/452      | NA                         | R01_cb17997_c2/f2p0/452      | NA                       | R01_cb17997_c2/f2p0/452     |
| R01_cb12577_c8/flp3/988      | NA                         | NA                           | NA                       | R01_cb12577_c8/flp3/988     |
| R01_cb10620_c3/flp0/2818     | NA                         | R01_cb10620_c3/flp0/2818     | NA                       | NA                          |
| R01_cb16394_c1/flp0/765      | R01_cb16394_c1/flp0/765    | NA                           | R01_cb16394_c1/flp0/765  | R01_cb16394_c1/flp0/765     |
| R01_cb18086_c0/flp0/551      | NA                         | R01_cb18086_c0/flp0/551      | NA                       | R01_cb18086_c0/flp0/551     |
| R01_cb1846_c32/flp0/3091     | NA                         | R01_cb1846_c32/flp0/3091     | NA                       | NA                          |
| R01_cb10679_c4/f6p0/491      | R01_cb10679_c4/f6p0/491    | R01_cb10679_c4/f6p0/491      | NA                       | R01_cb10679_c4/f6p0/491     |
| R01_cb18456_c1864/flp0/1407  | NA                         | R01_cb18456_c1864/flp0/1407  | NA                       | NA                          |
| R01_cb8564_c69012/f2p0/2088  | NA                         | R01_cb8564_c69012/f2p0/2088  | NA                       | NA                          |
| R01_cb18301_c6/flp0/1748     | NA                         | R01_cb18301_c6/flp0/1748     | R01_cb18301_c6/flp0/1748 | R01_cb18301_c6/flp0/1748    |
| R01_cb18456_c817/flp1/487    | R01_cb18456_c817/flp1/487  | R01_cb18456_c817/flp1/487    | NA                       | R01_cb18456_c817/flp1/487   |
| R01_cb1038_c1/flp0/4670      | NA                         | R01_cb1038_c1/flp0/4670      | NA                       | NA                          |
| R01_cb13418_c26/flp0/5325    | NA                         | R01_cb13418_c26/flp0/5325    | NA                       | NA                          |
| R01_cb8564_c114281/flp0/2328 | NA                         | R01_cb8564_c114281/flp0/2328 | NA                       | NA                          |
| R01_cb2104_c14/flp0/702      | NA                         | R01_cb2104_c14/flp0/702      | R01_cb2104_c14/flp0/702  | R01_cb2104_c14/flp0/702     |
| R01_cb8564_c13272/flp0/3761  | NA                         | NA                           | NA                       | R01_cb8564_c13272/flp0/3761 |
| R01_cb13408_c1/flp0/1396     | NA                         | NA                           | NA                       | R01_cb13408_c1/flp0/1396    |
| R01_cb302_c11/flp1/2721      | NA                         | NA                           | NA                       | R01_cb302_c11/flp1/2721     |
| R01_cb17266_c3/flp0/1412     | NA                         | R01_cb17266_c3/flp0/1412     | NA                       | NA                          |

|                                  |                                   |                                  |                                  |                                  |
|----------------------------------|-----------------------------------|----------------------------------|----------------------------------|----------------------------------|
| R01_cb18409_c62/flp0/1807        | R01_cb18409_c62/flp0/1807         | R01_cb18409_c62/flp0/1807        | R01_cb18409_c62/flp0/1807        | NA                               |
| R01_cb8409_c1/f3p1/2260          | NA                                | NA                               | NA                               | R01_cb8409_c1/f3p1/2260          |
| R01_cb2219_c1/flp1/3999          | NA                                | R01_cb2219_c1/flp1/3999          | NA                               | NA                               |
| R01_cb1618_c9/flp0/2077          | NA                                | R01_cb1618_c9/flp0/2077          | NA                               | NA                               |
| R01_cb8564_c117669/flp0/353<br>2 | NA                                | NA                               | NA                               | R01_cb8564_c117669/flp0/353<br>2 |
| R01_cb3791_c8/flp0/1798          | NA                                | NA                               | NA                               | R01_cb3791_c8/flp0/1798          |
| R01_cb2377_c13/flp0/2163         | NA                                | NA                               | NA                               | R01_cb2377_c13/flp0/2163         |
| R01_cb18409_c179/flp0/335        | R01_cb18409_c179/flp0/335         | R01_cb18409_c179/flp0/335        | R01_cb18409_c179/flp0/335        | R01_cb18409_c179/flp0/335        |
| R01_cb12620_c12/flp0/1003        | NA                                | NA                               | NA                               | R01_cb12620_c12/flp0/1003        |
| R01_cb2160_c7/flp1/2805          | NA                                | NA                               | NA                               | R01_cb2160_c7/flp1/2805          |
| R01_cb7962_c11/flp1/1802         | NA                                | NA                               | NA                               | R01_cb7962_c11/flp1/1802         |
| R01_cb6352_c8/flp0/2668          | R01_cb6352_c8/flp0/2668           | R01_cb6352_c8/flp0/2668          | NA                               | R01_cb6352_c8/flp0/2668          |
| R01_cb14971_c10/flp0/320         | R01_cb14971_c10/flp0/320          | R01_cb14971_c10/flp0/320         | R01_cb14971_c10/flp0/320         | R01_cb14971_c10/flp0/320         |
| R01_cb12148_c16/flp0/1860        | NA                                | R01_cb12148_c16/flp0/1860        | NA                               | R01_cb12148_c16/flp0/1860        |
| R01_cb18456_c1880/flp0/696       | R01_cb18456_c1880/flp0/696        | R01_cb18456_c1880/flp0/696       | R01_cb18456_c1880/flp0/696       | R01_cb18456_c1880/flp0/696       |
| R01_cb8823_c7/flp0/2210          | NA                                | NA                               | NA                               | R01_cb8823_c7/flp0/2210          |
| R01_cb18456_c7118/flp0/860       | NA                                | R01_cb18456_c7118/flp0/860       | NA                               | NA                               |
| R01_cb5151_c2/flp0/1636          | NA                                | NA                               | NA                               | R01_cb5151_c2/flp0/1636          |
| R01_cb15011_c5/flp0/878          | NA                                | R01_cb15011_c5/flp0/878          | NA                               | NA                               |
| R01_cb8564_c13067/flp0/2126      | R01_cb8564_c13067/flp0/2126       | R01_cb8564_c13067/flp0/2126      | R01_cb8564_c13067/flp0/2126      | R01_cb8564_c13067/flp0/2126      |
| R01_cb8564_c120663/flp0/255<br>3 | R01_cb8564_c120663/flp0/255<br>53 | R01_cb8564_c120663/flp0/255<br>3 | R01_cb8564_c120663/flp0/255<br>3 | R01_cb8564_c120663/flp0/255<br>3 |
| R01_cb4128_c11/flp0/3379         | NA                                | NA                               | NA                               | R01_cb4128_c11/flp0/3379         |
| R01_cb5952_c5/flp0/1361          | NA                                | NA                               | NA                               | R01_cb5952_c5/flp0/1361          |

|                             |                            |                             |                             |                             |
|-----------------------------|----------------------------|-----------------------------|-----------------------------|-----------------------------|
| R01_cb7806_c9/flp0/1648     | NA                         | R01_cb7806_c9/flp0/1648     | R01_cb7806_c9/flp0/1648     | R01_cb7806_c9/flp0/1648     |
| R01_cb14437_c5/flp0/471     | NA                         | R01_cb14437_c5/flp0/471     | R01_cb14437_c5/flp0/471     | NA                          |
| R01_cb7964_c4/flp2/2820     | NA                         | NA                          | NA                          | R01_cb7964_c4/flp2/2820     |
| R01_cb14573_c3/f4p0/444     | R01_cb14573_c3/f4p0/444    | R01_cb14573_c3/f4p0/444     | NA                          | NA                          |
| R01_cb14409_c3/flp0/372     | NA                         | R01_cb14409_c3/flp0/372     | R01_cb14409_c3/flp0/372     | R01_cb14409_c3/flp0/372     |
| R01_cb7087_c8/flp0/763      | NA                         | NA                          | R01_cb7087_c8/flp0/763      | R01_cb7087_c8/flp0/763      |
| R01_cb18539_c1/flp0/417     | R01_cb18539_c1/flp0/417    | R01_cb18539_c1/flp0/417     | R01_cb18539_c1/flp0/417     | R01_cb18539_c1/flp0/417     |
| R01_cb8564_c48244/flp0/4543 | NA                         | R01_cb8564_c48244/flp0/4543 | R01_cb8564_c48244/flp0/4543 | R01_cb8564_c48244/flp0/4543 |
| R01_cb781_c19/flp1/2021     | NA                         | NA                          | NA                          | R01_cb781_c19/flp1/2021     |
| R01_cb18456_c2525/flp0/1343 | NA                         | R01_cb18456_c2525/flp0/1343 | NA                          | R01_cb18456_c2525/flp0/1343 |
| R01_cb6885_c5/flp0/3957     | NA                         | R01_cb6885_c5/flp0/3957     | NA                          | NA                          |
| R01_cb8564_c70921/flp0/2533 | NA                         | R01_cb8564_c70921/flp0/2533 | NA                          | NA                          |
| R01_cb14535_c1/flp0/1145    | NA                         | NA                          | R01_cb14535_c1/flp0/1145    | NA                          |
| R01_cb4576_c78/flp0/2184    | NA                         | NA                          | NA                          | R01_cb4576_c78/flp0/2184    |
| R01_cb8384_c2/flp2/2308     | NA                         | R01_cb8384_c2/flp2/2308     | NA                          | NA                          |
| R01_cb625_c13/flp0/3947     | R01_cb625_c13/flp0/3947    | R01_cb625_c13/flp0/3947     | R01_cb625_c13/flp0/3947     | R01_cb625_c13/flp0/3947     |
| R01_cb8564_c9903/f2p0/4546  | NA                         | R01_cb8564_c9903/f2p0/4546  | NA                          | R01_cb8564_c9903/f2p0/4546  |
| R01_cb8134_c2/flp0/787      | NA                         | R01_cb8134_c2/flp0/787      | R01_cb8134_c2/flp0/787      | R01_cb8134_c2/flp0/787      |
| R01_cb6706_c4/f2p0/2793     | NA                         | R01_cb6706_c4/f2p0/2793     | R01_cb6706_c4/f2p0/2793     | R01_cb6706_c4/f2p0/2793     |
| R01_cb8564_c15481/flp1/3541 | NA                         | R01_cb8564_c15481/flp1/3541 | NA                          | NA                          |
| R01_cb506_c19/flp0/4701     | NA                         | NA                          | NA                          | R01_cb506_c19/flp0/4701     |
| R01_cb3732_c12/flp1/2738    | NA                         | NA                          | NA                          | R01_cb3732_c12/flp1/2738    |
| R01_cb10314_c9/f2p2/565     | R01_cb10314_c9/f2p2/565    | R01_cb10314_c9/f2p2/565     | NA                          | NA                          |
| R01_cb17527_c0/flp0/1019    | R01_cb17527_c0/flp0/1019   | R01_cb17527_c0/flp0/1019    | R01_cb17527_c0/flp0/1019    | NA                          |
| R01_cb15584_c2/flp0/1708    | NA                         | R01_cb15584_c2/flp0/1708    | NA                          | NA                          |
| R01_cb18456_c1878/flp0/471  | R01_cb18456_c1878/flp0/471 | R01_cb18456_c1878/flp0/471  | R01_cb18456_c1878/flp0/471  | R01_cb18456_c1878/flp0/471  |



|                             |                             |                             |                             |                             |
|-----------------------------|-----------------------------|-----------------------------|-----------------------------|-----------------------------|
| R01_cb2104_c12/flp0/1216    | NA                          | NA                          | R01_cb2104_c12/flp0/1216    | R01_cb2104_c12/flp0/1216    |
| R01_cb14564_c1/flp0/561     | R01_cb14564_c1/flp0/561     | R01_cb14564_c1/flp0/561     | NA                          | NA                          |
| R01_cb17811_c1/flp0/742     | NA                          | NA                          | NA                          | R01_cb17811_c1/flp0/742     |
| R01_cb4602_c5/flp0/2199     | R01_cb4602_c5/flp0/2199     | R01_cb4602_c5/flp0/2199     | NA                          | NA                          |
| R01_cb945_c14/flp0/2568     | NA                          | R01_cb945_c14/flp0/2568     | NA                          | NA                          |
| R01_cb9365_c4/flp1/1978     | NA                          | NA                          | NA                          | R01_cb9365_c4/flp1/1978     |
| R01_cb8564_c71413/flp0/2773 | R01_cb8564_c71413/flp0/2773 | R01_cb8564_c71413/flp0/2773 | R01_cb8564_c71413/flp0/2773 | R01_cb8564_c71413/flp0/2773 |
| R01_cb16672_c0/f2p0/519     | R01_cb16672_c0/f2p0/519     | R01_cb16672_c0/f2p0/519     | R01_cb16672_c0/f2p0/519     | NA                          |
| R01_cb17693_c0/flp0/385     | R01_cb17693_c0/flp0/385     | R01_cb17693_c0/flp0/385     | R01_cb17693_c0/flp0/385     | R01_cb17693_c0/flp0/385     |
| R01_cb10780_c1/flp0/3248    | R01_cb10780_c1/flp0/3248    | R01_cb10780_c1/flp0/3248    | R01_cb10780_c1/flp0/3248    | R01_cb10780_c1/flp0/3248    |
| R01_cb8970_c3/flp0/527      | R01_cb8970_c3/flp0/527      | R01_cb8970_c3/flp0/527      | R01_cb8970_c3/flp0/527      | R01_cb8970_c3/flp0/527      |
| R01_cb11044_c2/flp0/1717    | NA                          | R01_cb11044_c2/flp0/1717    | NA                          | NA                          |
| R01_cb10343_c5/flp0/1879    | NA                          | R01_cb10343_c5/flp0/1879    | NA                          | NA                          |
| R01_cb4489_c10/flp0/2997    | NA                          | R01_cb4489_c10/flp0/2997    | NA                          | R01_cb4489_c10/flp0/2997    |
| R01_cb357_c0/fl2p2/905      | NA                          | NA                          | NA                          | R01_cb357_c0/fl2p2/905      |
| R01_cb18045_c2/flp0/491     | NA                          | R01_cb18045_c2/flp0/491     | NA                          | R01_cb18045_c2/flp0/491     |
| R01_cb8123_c4/flp0/3382     | NA                          | R01_cb8123_c4/flp0/3382     | NA                          | NA                          |
| R01_cb16997_c68/flp0/2309   | NA                          | NA                          | NA                          | R01_cb16997_c68/flp0/2309   |
| R01_cb18409_c86/flp0/983    | R01_cb18409_c86/flp0/983    | R01_cb18409_c86/flp0/983    | R01_cb18409_c86/flp0/983    | R01_cb18409_c86/flp0/983    |
| R01_cb7055_c64/flp0/1405    | NA                          | R01_cb7055_c64/flp0/1405    | NA                          | NA                          |
| R01_cb4140_c9/flp0/2412     | NA                          | R01_cb4140_c9/flp0/2412     | NA                          | NA                          |
| R01_cb7409_c2/flp0/2622     | NA                          | R01_cb7409_c2/flp0/2622     | NA                          | NA                          |
| R01_cb16967_c0/flp0/1616    | NA                          | NA                          | NA                          | R01_cb16967_c0/flp0/1616    |
| R01_cb7221_c4/flp1/2600     | NA                          | NA                          | NA                          | R01_cb7221_c4/flp1/2600     |
| R01_cb6258_c15/flp0/2539    | NA                          | NA                          | NA                          | R01_cb6258_c15/flp0/2539    |

|                                  |                                  |                             |                             |                                  |
|----------------------------------|----------------------------------|-----------------------------|-----------------------------|----------------------------------|
| R01_cb10972_c3/flp0/960          | NA                               | NA                          | R01_cb10972_c3/flp0/960     | R01_cb10972_c3/flp0/960          |
| R01_cb8669_c11/flp0/1138         | NA                               | NA                          | NA                          | R01_cb8669_c11/flp0/1138         |
| R01_cb18456_c1677/flp0/872       | NA                               | R01_cb18456_c1677/flp0/872  | NA                          | NA                               |
| R01_cb7611_c3/flp0/2574          | NA                               | NA                          | NA                          | R01_cb7611_c3/flp0/2574          |
| R01_cb7253_c9/flp0/2565          | NA                               | R01_cb7253_c9/flp0/2565     | NA                          | NA                               |
| R01_cb1626_c4/f2p1/4537          | NA                               | NA                          | NA                          | R01_cb1626_c4/f2p1/4537          |
| R01_cb9668_c0/flp1/1993          | NA                               | R01_cb9668_c0/flp1/1993     | NA                          | NA                               |
| R01_cb7064_c17/flp0/3300         | NA                               | R01_cb7064_c17/flp0/3300    | NA                          | NA                               |
| R01_cb1523_c2/flp0/4204          | NA                               | R01_cb1523_c2/flp0/4204     | NA                          | NA                               |
| R01_cb770_c11/flp0/432           | R01_cb770_c11/flp0/432           | R01_cb770_c11/flp0/432      | R01_cb770_c11/flp0/432      | R01_cb770_c11/flp0/432           |
| R01_cb9351_c0/flp0/2102          | R01_cb9351_c0/flp0/2102          | R01_cb9351_c0/flp0/2102     | R01_cb9351_c0/flp0/2102     | NA                               |
| R01_cb17600_c1/flp0/1139         | NA                               | R01_cb17600_c1/flp0/1139    | NA                          | NA                               |
| R01_cb9825_c1/flp0/4342          | NA                               | NA                          | R01_cb9825_c1/flp0/4342     | R01_cb9825_c1/flp0/4342          |
| R01_cb6081_c0/f2p0/2855          | NA                               | R01_cb6081_c0/f2p0/2855     | R01_cb6081_c0/f2p0/2855     | R01_cb6081_c0/f2p0/2855          |
| R01_cb12421_c63/flp0/637         | NA                               | R01_cb12421_c63/flp0/637    | NA                          | NA                               |
| R01_cb17652_c0/flp0/1003         | NA                               | NA                          | R01_cb17652_c0/flp0/1003    | R01_cb17652_c0/flp0/1003         |
| R01_cb8564_c121135/flp0/254<br>4 | NA                               | NA                          | NA                          | R01_cb8564_c121135/flp0/254<br>4 |
| R01_cb8027_c6/flp0/2577          | NA                               | NA                          | NA                          | R01_cb8027_c6/flp0/2577          |
| R01_cb12023_c1/flp0/742          | NA                               | NA                          | NA                          | R01_cb12023_c1/flp0/742          |
| R01_cb6623_c24/flp1/2737         | NA                               | R01_cb6623_c24/flp1/2737    | NA                          | NA                               |
| R01_cb14502_c18/flp0/1655        | NA                               | NA                          | R01_cb14502_c18/flp0/1655   | NA                               |
| R01_cb8564_c11389/flp0/2269      | R01_cb8564_c11389/flp0/2269<br>9 | R01_cb8564_c11389/flp0/2269 | R01_cb8564_c11389/flp0/2269 | R01_cb8564_c11389/flp0/2269      |
| R01_cb8564_c76824/flp0/4260      | NA                               | R01_cb8564_c76824/flp0/4260 | NA                          | R01_cb8564_c76824/flp0/4260      |
| R01_cb8564_c117218/flp0/221      | NA                               | R01_cb8564_c117218/flp0/221 | R01_cb8564_c117218/flp0/221 | NA                               |

|                              |                            |                              |                            |                             |
|------------------------------|----------------------------|------------------------------|----------------------------|-----------------------------|
| 7                            |                            | 7                            | 7                          |                             |
| R01_cb12603_c15/flp0/1620    | NA                         | NA                           | R01_cb12603_c15/flp0/1620  | R01_cb12603_c15/flp0/1620   |
| R01_cb7611_c11/flp1/2476     | NA                         | NA                           | NA                         | R01_cb7611_c11/flp1/2476    |
| R01_cb11455_c0/f3p0/576      | NA                         | R01_cb11455_c0/f3p0/576      | NA                         | R01_cb11455_c0/f3p0/576     |
| R01_cb11038_c2/flp0/2589     | NA                         | NA                           | NA                         | R01_cb11038_c2/flp0/2589    |
| R01_cb3491_c4/flp0/2063      | NA                         | R01_cb3491_c4/flp0/2063      | NA                         | NA                          |
| R01_cb13462_c4/flp0/1761     | NA                         | R01_cb13462_c4/flp0/1761     | NA                         | R01_cb13462_c4/flp0/1761    |
| R01_cb18456_c1457/f3p0/360   | R01_cb18456_c1457/f3p0/360 | R01_cb18456_c1457/f3p0/360   | R01_cb18456_c1457/f3p0/360 | R01_cb18456_c1457/f3p0/360  |
| R01_cb8564_c119518/flp0/2479 | NA                         | R01_cb8564_c119518/flp0/2479 | NA                         | NA                          |
| R01_cb3678_c17/flp0/2471     | NA                         | R01_cb3678_c17/flp0/2471     | NA                         | R01_cb3678_c17/flp0/2471    |
| R01_cb17498_c0/flp1/1395     | NA                         | NA                           | NA                         | R01_cb17498_c0/flp1/1395    |
| R01_cb16403_c0/flp0/1864     | NA                         | R01_cb16403_c0/flp0/1864     | R01_cb16403_c0/flp0/1864   | R01_cb16403_c0/flp0/1864    |
| R01_cb8564_c15434/f4p0/2668  | NA                         | NA                           | NA                         | R01_cb8564_c15434/f4p0/2668 |
| R01_cb18456_c4056/flp0/1520  | NA                         | NA                           | NA                         | R01_cb18456_c4056/flp0/1520 |
| R01_cb8669_c3/flp0/2234      | NA                         | NA                           | R01_cb8669_c3/flp0/2234    | R01_cb8669_c3/flp0/2234     |
| R01_cb1941_c6/f2p1/2058      | NA                         | R01_cb1941_c6/f2p1/2058      | NA                         | NA                          |
| R01_cb4923_c2/flp0/3225      | NA                         | NA                           | NA                         | R01_cb4923_c2/flp0/3225     |
| R01_cb2072_c44/flp0/2957     | NA                         | R01_cb2072_c44/flp0/2957     | NA                         | R01_cb2072_c44/flp0/2957    |
| R01_cb10404_c4/flp0/1707     | NA                         | R01_cb10404_c4/flp0/1707     | NA                         | NA                          |
| R01_cb6507_c5/flp0/2184      | NA                         | NA                           | NA                         | R01_cb6507_c5/flp0/2184     |
| R01_cb12641_c20/flp0/1120    | NA                         | NA                           | NA                         | R01_cb12641_c20/flp0/1120   |
| R01_cb5207_c8/flp0/566       | R01_cb5207_c8/flp0/566     | R01_cb5207_c8/flp0/566       | NA                         | NA                          |
| R01_cb4152_c8/flp0/3099      | NA                         | R01_cb4152_c8/flp0/3099      | NA                         | R01_cb4152_c8/flp0/3099     |
| R01_cb7611_c19/flp0/3611     | NA                         | R01_cb7611_c19/flp0/3611     | NA                         | NA                          |
| R01_cb17118_c5/flp0/593      | R01_cb17118_c5/flp0/593    | R01_cb17118_c5/flp0/593      | R01_cb17118_c5/flp0/593    | R01_cb17118_c5/flp0/593     |

|                             |                            |                             |                             |                             |
|-----------------------------|----------------------------|-----------------------------|-----------------------------|-----------------------------|
| R01_cb8564_c70755/f1p0/2552 | NA                         | NA                          | NA                          | R01_cb8564_c70755/f1p0/2552 |
| R01_cb5373_c1/f2p0/2534     | NA                         | NA                          | NA                          | R01_cb5373_c1/f2p0/2534     |
| R01_cb6802_c34/f1p0/4811    | NA                         | R01_cb6802_c34/f1p0/4811    | R01_cb6802_c34/f1p0/4811    | R01_cb6802_c34/f1p0/4811    |
| R01_cb12662_c5/f2p0/1554    | NA                         | R01_cb12662_c5/f2p0/1554    | NA                          | NA                          |
| R01_cb18456_c7308/f1p0/920  | R01_cb18456_c7308/f1p0/920 | R01_cb18456_c7308/f1p0/920  | NA                          | R01_cb18456_c7308/f1p0/920  |
| R01_cb15474_c5/f1p0/1558    | R01_cb15474_c5/f1p0/1558   | NA                          | NA                          | R01_cb15474_c5/f1p0/1558    |
| R01_cb7214_c2/f1p0/2219     | NA                         | NA                          | NA                          | R01_cb7214_c2/f1p0/2219     |
| R01_cb4147_c45/f1p0/726     | NA                         | R01_cb4147_c45/f1p0/726     | NA                          | R01_cb4147_c45/f1p0/726     |
| R01_cb2895_c6/f1p0/1707     | NA                         | R01_cb2895_c6/f1p0/1707     | NA                          | NA                          |
| R01_cb3213_c32/f1p0/479     | R01_cb3213_c32/f1p0/479    | R01_cb3213_c32/f1p0/479     | R01_cb3213_c32/f1p0/479     | R01_cb3213_c32/f1p0/479     |
| R01_cb17468_c0/f2p0/759     | NA                         | NA                          | R01_cb17468_c0/f2p0/759     | R01_cb17468_c0/f2p0/759     |
| R01_cb8295_c5/f5p0/2401     | NA                         | NA                          | NA                          | R01_cb8295_c5/f5p0/2401     |
| R01_cb17313_c2/f1p0/6472    | R01_cb17313_c2/f1p0/6472   | R01_cb17313_c2/f1p0/6472    | R01_cb17313_c2/f1p0/6472    | NA                          |
| R01_cb12767_c5/f1p1/1228    | NA                         | NA                          | NA                          | R01_cb12767_c5/f1p1/1228    |
| R01_cb18456_c6818/f1p0/353  | R01_cb18456_c6818/f1p0/353 | R01_cb18456_c6818/f1p0/353  | R01_cb18456_c6818/f1p0/353  | NA                          |
| R01_cb6839_c2/f1p0/2761     | NA                         | R01_cb6839_c2/f1p0/2761     | NA                          | NA                          |
| R01_cb11090_c5/f1p0/1735    | NA                         | R01_cb11090_c5/f1p0/1735    | NA                          | NA                          |
| R01_cb18727_c1/f1p0/1217    | NA                         | R01_cb18727_c1/f1p0/1217    | R01_cb18727_c1/f1p0/1217    | R01_cb18727_c1/f1p0/1217    |
| R01_cb9886_c0/f1p0/1902     | NA                         | R01_cb9886_c0/f1p0/1902     | NA                          | R01_cb9886_c0/f1p0/1902     |
| R01_cb18156_c0/f1p0/977     | NA                         | NA                          | R01_cb18156_c0/f1p0/977     | R01_cb18156_c0/f1p0/977     |
| R01_cb10214_c2/f1p0/1453    | R01_cb10214_c2/f1p0/1453   | R01_cb10214_c2/f1p0/1453    | R01_cb10214_c2/f1p0/1453    | R01_cb10214_c2/f1p0/1453    |
| R01_cb8564_c24791/f1p0/4031 | NA                         | R01_cb8564_c24791/f1p0/4031 | NA                          | NA                          |
| R01_cb8564_c37095/f1p0/2917 | NA                         | NA                          | R01_cb8564_c37095/f1p0/2917 | R01_cb8564_c37095/f1p0/2917 |
| R01_cb14517_c11/f1p1/1829   | NA                         | NA                          | NA                          | R01_cb14517_c11/f1p1/1829   |
| R01_cb11057_c2/f1p0/1759    | NA                         | NA                          | NA                          | R01_cb11057_c2/f1p0/1759    |
| R01_cb16178_c2/f1p0/984     | R01_cb16178_c2/f1p0/984    | R01_cb16178_c2/f1p0/984     | R01_cb16178_c2/f1p0/984     | R01_cb16178_c2/f1p0/984     |

|                               |                              |                              |                              |                               |
|-------------------------------|------------------------------|------------------------------|------------------------------|-------------------------------|
| R01_cb1938_c6/flp1/2278       | NA                           | NA                           | NA                           | R01_cb1938_c6/flp1/2278       |
| R01_cb8564_c1040/flp0/2002    | R01_cb8564_c1040/flp0/2002   | R01_cb8564_c1040/flp0/2002   | R01_cb8564_c1040/flp0/2002   | R01_cb8564_c1040/flp0/2002    |
| R01_cb14286_c6/flp0/646       | R01_cb14286_c6/flp0/646      | R01_cb14286_c6/flp0/646      | R01_cb14286_c6/flp0/646      | R01_cb14286_c6/flp0/646       |
| R01_cb13490_c3/f2p0/752       | R01_cb13490_c3/f2p0/752      | R01_cb13490_c3/f2p0/752      | R01_cb13490_c3/f2p0/752      | R01_cb13490_c3/f2p0/752       |
| R01_cb5659_c90/flp0/2324      | NA                           | NA                           | NA                           | R01_cb5659_c90/flp0/2324      |
| R01_cb8564_c66340/f2p1/2873   | NA                           | NA                           | NA                           | R01_cb8564_c66340/f2p1/2873   |
| R01_cb8564_c109997/f2p0/2937  | R01_cb8564_c109997/f2p0/2937 | R01_cb8564_c109997/f2p0/2937 | R01_cb8564_c109997/f2p0/2937 | R01_cb8564_c109997/f2p0/2937  |
| R01_cb13602_c24/flp0/1606     | NA                           | NA                           | NA                           | R01_cb13602_c24/flp0/1606     |
| R01_cb18409_c109/flp0/876     | R01_cb18409_c109/flp0/876    | R01_cb18409_c109/flp0/876    | R01_cb18409_c109/flp0/876    | R01_cb18409_c109/flp0/876     |
| R01_cb7822_c6/flp0/496        | NA                           | NA                           | NA                           | R01_cb7822_c6/flp0/496        |
| R01_cb8564_c120121/flp0/2816  | R01_cb8564_c120121/flp0/2816 | R01_cb8564_c120121/flp0/2816 | NA                           | NA                            |
| R01_cb8564_c21582/flp0/4177   | NA                           | NA                           | NA                           | R01_cb8564_c21582/flp0/4177   |
| R01_cb7219_c11/flp3/2453      | NA                           | NA                           | NA                           | R01_cb7219_c11/flp3/2453      |
| R01_cb8564_c10963/flp0/2691   | NA                           | R01_cb8564_c10963/flp0/2691  | NA                           | R01_cb8564_c10963/flp0/2691   |
| R01_cb5586_c8/flp0/2480       | NA                           | R01_cb5586_c8/flp0/2480      | NA                           | R01_cb5586_c8/flp0/2480       |
| R01_cb13867_c13/flp0/736      | NA                           | NA                           | NA                           | R01_cb13867_c13/flp0/736      |
| R01_cb8564_c147145/f37p3/2018 | NA                           | NA                           | NA                           | R01_cb8564_c147145/f37p3/2018 |
| R01_cb14620_c6/flp0/1780      | NA                           | NA                           | NA                           | R01_cb14620_c6/flp0/1780      |
| R01_cb16342_c1/flp0/641       | R01_cb16342_c1/flp0/641      | R01_cb16342_c1/flp0/641      | R01_cb16342_c1/flp0/641      | R01_cb16342_c1/flp0/641       |
| R01_cb17319_c0/flp0/1732      | NA                           | R01_cb17319_c0/flp0/1732     | R01_cb17319_c0/flp0/1732     | NA                            |
| R01_cb17137_c6/flp0/575       | NA                           | R01_cb17137_c6/flp0/575      | NA                           | R01_cb17137_c6/flp0/575       |
| R01_cb8564_c74972/flp0/2743   | NA                           | R01_cb8564_c74972/flp0/2743  | NA                           | R01_cb8564_c74972/flp0/2743   |
| R01_cb13812_c0/f3p0/1232      | NA                           | NA                           | NA                           | R01_cb13812_c0/f3p0/1232      |

|                              |                             |                              |                             |                              |
|------------------------------|-----------------------------|------------------------------|-----------------------------|------------------------------|
| R01_cb17711_c2/flp0/1797     | NA                          | R01_cb17711_c2/flp0/1797     | NA                          | NA                           |
| R01_cb10504_c1/flp0/2631     | NA                          | R01_cb10504_c1/flp0/2631     | NA                          | R01_cb10504_c1/flp0/2631     |
| R01_cb8564_c21982/flp0/3812  | NA                          | R01_cb8564_c21982/flp0/3812  | NA                          | NA                           |
| R01_cb8564_c37799/flp0/2001  | R01_cb8564_c37799/flp0/2001 | R01_cb8564_c37799/flp0/2001  | R01_cb8564_c37799/flp0/2001 | R01_cb8564_c37799/flp0/2001  |
| R01_cb11967_c16/flp0/392     | R01_cb11967_c16/flp0/392    | R01_cb11967_c16/flp0/392     | R01_cb11967_c16/flp0/392    | R01_cb11967_c16/flp0/392     |
| R01_cb12688_c2/flp0/442      | R01_cb12688_c2/flp0/442     | R01_cb12688_c2/flp0/442      | NA                          | R01_cb12688_c2/flp0/442      |
| R01_cb17706_c6/flp1/580      | R01_cb17706_c6/flp1/580     | R01_cb17706_c6/flp1/580      | R01_cb17706_c6/flp1/580     | R01_cb17706_c6/flp1/580      |
| R01_cb18529_c1/flp0/711      | R01_cb18529_c1/flp0/711     | R01_cb18529_c1/flp0/711      | R01_cb18529_c1/flp0/711     | R01_cb18529_c1/flp0/711      |
| R01_cb2698_c7/flp0/1527      | NA                          | NA                           | NA                          | R01_cb2698_c7/flp0/1527      |
| R01_cb8564_c124363/flp0/2375 | NA                          | NA                           | NA                          | R01_cb8564_c124363/flp0/2375 |
| R01_cb4342_c4/flp0/2299      | NA                          | R01_cb4342_c4/flp0/2299      | NA                          | NA                           |
| R01_cb16566_c1/flp0/1302     | NA                          | R01_cb16566_c1/flp0/1302     | R01_cb16566_c1/flp0/1302    | R01_cb16566_c1/flp0/1302     |
| R01_cb9242_c0/flp0/2146      | NA                          | NA                           | R01_cb9242_c0/flp0/2146     | NA                           |
| R01_cb14352_c1/flp0/481      | NA                          | R01_cb14352_c1/flp0/481      | R01_cb14352_c1/flp0/481     | R01_cb14352_c1/flp0/481      |
| R01_cb13001_c4/flp0/892      | NA                          | NA                           | NA                          | R01_cb13001_c4/flp0/892      |
| R01_cb8564_c79896/flp0/2804  | NA                          | R01_cb8564_c79896/flp0/2804  | NA                          | NA                           |
| R01_cb11524_c1/flp0/2290     | NA                          | NA                           | NA                          | R01_cb11524_c1/flp0/2290     |
| R01_cb13279_c1/flp0/894      | NA                          | NA                           | NA                          | R01_cb13279_c1/flp0/894      |
| R01_cb10024_c249/flp0/691    | R01_cb10024_c249/flp0/691   | R01_cb10024_c249/flp0/691    | R01_cb10024_c249/flp0/691   | NA                           |
| R01_cb8564_c115046/flp1/2486 | NA                          | R01_cb8564_c115046/flp1/2486 | NA                          | NA                           |
| R01_cb18760_c1/flp0/453      | R01_cb18760_c1/flp0/453     | R01_cb18760_c1/flp0/453      | R01_cb18760_c1/flp0/453     | R01_cb18760_c1/flp0/453      |
| R01_cb6141_c5/flp0/752       | NA                          | R01_cb6141_c5/flp0/752       | NA                          | NA                           |
| R01_cb2880_c3/flp0/3627      | NA                          | R01_cb2880_c3/flp0/3627      | NA                          | R01_cb2880_c3/flp0/3627      |

|                              |                             |                              |                             |                             |
|------------------------------|-----------------------------|------------------------------|-----------------------------|-----------------------------|
| R01_cb6354_c3/f1p0/5050      | NA                          | NA                           | NA                          | R01_cb6354_c3/f1p0/5050     |
| R01_cb11386_c1/f1p0/2702     | NA                          | R01_cb11386_c1/f1p0/2702     | NA                          | NA                          |
| R01_cb13433_c40/f1p0/800     | NA                          | R01_cb13433_c40/f1p0/800     | NA                          | R01_cb13433_c40/f1p0/800    |
| R01_cb8453_c1/f1p0/2265      | NA                          | R01_cb8453_c1/f1p0/2265      | NA                          | NA                          |
| R01_cb16425_c6/f1p0/1285     | R01_cb16425_c6/f1p0/1285    | R01_cb16425_c6/f1p0/1285     | R01_cb16425_c6/f1p0/1285    | NA                          |
| R01_cb2674_c6/f1p0/2252      | NA                          | R01_cb2674_c6/f1p0/2252      | R01_cb2674_c6/f1p0/2252     | NA                          |
| R01_cb9448_c18/f2p0/1769     | NA                          | NA                           | NA                          | R01_cb9448_c18/f2p0/1769    |
| R01_cb6802_c81/f1p0/2298     | NA                          | R01_cb6802_c81/f1p0/2298     | NA                          | NA                          |
| R01_cb5122_c19/f1p0/2936     | NA                          | NA                           | NA                          | R01_cb5122_c19/f1p0/2936    |
| R01_cb18113_c2/f1p0/865      | NA                          | NA                           | NA                          | R01_cb18113_c2/f1p0/865     |
| R01_cb12774_c0/f2p0/906      | NA                          | R01_cb12774_c0/f2p0/906      | NA                          | NA                          |
| R01_cb8564_c69337/f4p0/2096  | NA                          | R01_cb8564_c69337/f4p0/2096  | R01_cb8564_c69337/f4p0/2096 | R01_cb8564_c69337/f4p0/2096 |
| R01_cb12641_c9/f2p1/1037     | NA                          | NA                           | NA                          | R01_cb12641_c9/f2p1/1037    |
| R01_cb18456_c7592/f1p0/811   | NA                          | R01_cb18456_c7592/f1p0/811   | NA                          | R01_cb18456_c7592/f1p0/811  |
| R01_cb16273_c0/f1p0/585      | NA                          | R01_cb16273_c0/f1p0/585      | NA                          | R01_cb16273_c0/f1p0/585     |
| R01_cb8582_c1/f1p0/2167      | NA                          | R01_cb8582_c1/f1p0/2167      | NA                          | NA                          |
| R01_cb4583_c11/f1p0/3476     | NA                          | R01_cb4583_c11/f1p0/3476     | R01_cb4583_c11/f1p0/3476    | NA                          |
| R01_cb8564_c116826/f1p0/3636 | NA                          | R01_cb8564_c116826/f1p0/3636 | NA                          | NA                          |
| R01_cb10314_c10/f1p3/565     | NA                          | R01_cb10314_c10/f1p3/565     | NA                          | NA                          |
| R01_cb2773_c1/f2p0/2520      | NA                          | R01_cb2773_c1/f2p0/2520      | R01_cb2773_c1/f2p0/2520     | R01_cb2773_c1/f2p0/2520     |
| R01_cb8564_c33685/f2p0/2837  | R01_cb8564_c33685/f2p0/2837 | R01_cb8564_c33685/f2p0/2837  | R01_cb8564_c33685/f2p0/2837 | R01_cb8564_c33685/f2p0/2837 |
| R01_cb3564_c11/f1p0/3379     | NA                          | NA                           | NA                          | R01_cb3564_c11/f1p0/3379    |
| R01_cb16476_c0/f5p0/1206     | NA                          | R01_cb16476_c0/f5p0/1206     | R01_cb16476_c0/f5p0/1206    | R01_cb16476_c0/f5p0/1206    |
| R01_cb15260_c4/f2p0/642      | NA                          | R01_cb15260_c4/f2p0/642      | NA                          | NA                          |

|                              |                            |                             |                            |                              |
|------------------------------|----------------------------|-----------------------------|----------------------------|------------------------------|
| R01_cb11043_c6/flp0/559      | NA                         | R01_cb11043_c6/flp0/559     | NA                         | NA                           |
| R01_cb14502_c3/f5p0/328      | R01_cb14502_c3/f5p0/328    | R01_cb14502_c3/f5p0/328     | R01_cb14502_c3/f5p0/328    | R01_cb14502_c3/f5p0/328      |
| R01_cb18705_c4/flp0/1376     | NA                         | R01_cb18705_c4/flp0/1376    | R01_cb18705_c4/flp0/1376   | R01_cb18705_c4/flp0/1376     |
| R01_cb16486_c0/f4p0/813      | NA                         | R01_cb16486_c0/f4p0/813     | R01_cb16486_c0/f4p0/813    | R01_cb16486_c0/f4p0/813      |
| R01_cb15297_c0/flp0/1003     | R01_cb15297_c0/flp0/1003   | R01_cb15297_c0/flp0/1003    | R01_cb15297_c0/flp0/1003   | R01_cb15297_c0/flp0/1003     |
| R01_cb8564_c87457/f2p0/2828  | NA                         | R01_cb8564_c87457/f2p0/2828 | NA                         | NA                           |
| R01_cb12147_c7/flp0/801      | NA                         | R01_cb12147_c7/flp0/801     | R01_cb12147_c7/flp0/801    | NA                           |
| R01_cb18614_c1/flp0/1281     | NA                         | NA                          | NA                         | R01_cb18614_c1/flp0/1281     |
| R01_cb8812_c2/flp0/1987      | R01_cb8812_c2/flp0/1987    | R01_cb8812_c2/flp0/1987     | R01_cb8812_c2/flp0/1987    | NA                           |
| R01_cb2729_c9/flp0/4977      | NA                         | R01_cb2729_c9/flp0/4977     | NA                         | R01_cb2729_c9/flp0/4977      |
| R01_cb5490_c0/flp0/3087      | NA                         | R01_cb5490_c0/flp0/3087     | NA                         | NA                           |
| R01_cb6654_c1/f2p0/2765      | NA                         | R01_cb6654_c1/f2p0/2765     | NA                         | NA                           |
| R01_cb15925_c2/flp0/1565     | NA                         | R01_cb15925_c2/flp0/1565    | NA                         | NA                           |
| R01_cb8564_c85863/flp2/2224  | NA                         | R01_cb8564_c85863/flp2/2224 | NA                         | NA                           |
| R01_cb310_c5/flp0/4264       | NA                         | R01_cb310_c5/flp0/4264      | NA                         | NA                           |
| R01_cb18456_c7361/flp0/574   | R01_cb18456_c7361/flp0/574 | R01_cb18456_c7361/flp0/574  | R01_cb18456_c7361/flp0/574 | R01_cb18456_c7361/flp0/574   |
| R01_cb16092_c4/f2p0/455      | R01_cb16092_c4/f2p0/455    | R01_cb16092_c4/f2p0/455     | R01_cb16092_c4/f2p0/455    | R01_cb16092_c4/f2p0/455      |
| R01_cb8564_c14452/flp0/3201  | NA                         | R01_cb8564_c14452/flp0/3201 | NA                         | NA                           |
| R01_cb8564_c116186/f3p1/2503 | NA                         | NA                          | NA                         | R01_cb8564_c116186/f3p1/2503 |
| R01_cb5567_c1/flp0/2620      | NA                         | NA                          | R01_cb5567_c1/flp0/2620    | R01_cb5567_c1/flp0/2620      |
| R01_cb10323_c3/flp0/761      | NA                         | NA                          | R01_cb10323_c3/flp0/761    | R01_cb10323_c3/flp0/761      |
| R01_cb14585_c0/f4p0/557      | NA                         | R01_cb14585_c0/f4p0/557     | NA                         | R01_cb14585_c0/f4p0/557      |
| R01_cb18497_c1/flp0/821      | NA                         | NA                          | R01_cb18497_c1/flp0/821    | R01_cb18497_c1/flp0/821      |
| R01_cb15695_c1/flp0/794      | R01_cb15695_c1/flp0/794    | R01_cb15695_c1/flp0/794     | R01_cb15695_c1/flp0/794    | R01_cb15695_c1/flp0/794      |
| R01_cb352_c6/flp0/1908       | NA                         | NA                          | NA                         | R01_cb352_c6/flp0/1908       |



|                              |                          |                              |                              |                             |
|------------------------------|--------------------------|------------------------------|------------------------------|-----------------------------|
| R01_cb1998_c5/flp0/3344      | R01_cb1998_c5/flp0/3344  | R01_cb1998_c5/flp0/3344      | R01_cb1998_c5/flp0/3344      | R01_cb1998_c5/flp0/3344     |
| R01_cb2866_c0/f2p0/3795      | NA                       | NA                           | NA                           | R01_cb2866_c0/f2p0/3795     |
| R01_cb18456_c1868/flp0/859   | NA                       | R01_cb18456_c1868/flp0/859   | NA                           | R01_cb18456_c1868/flp0/859  |
| R01_cb5190_c8/flp1/2343      | NA                       | NA                           | NA                           | R01_cb5190_c8/flp1/2343     |
| R01_cb8564_c87448/flp0/2561  | NA                       | R01_cb8564_c87448/flp0/2561  | NA                           | NA                          |
| R01_cb6216_c0/f3p0/2670      | NA                       | NA                           | NA                           | R01_cb6216_c0/f3p0/2670     |
| R01_cb16052_c14/flp0/1756    | NA                       | R01_cb16052_c14/flp0/1756    | R01_cb16052_c14/flp0/1756    | NA                          |
| R01_cb17199_c4/flp0/1138     | NA                       | R01_cb17199_c4/flp0/1138     | NA                           | NA                          |
| R01_cb13982_c3/flp0/1371     | NA                       | R01_cb13982_c3/flp0/1371     | NA                           | R01_cb13982_c3/flp0/1371    |
| R01_cb8564_c48237/flp0/3233  | NA                       | NA                           | NA                           | R01_cb8564_c48237/flp0/3233 |
| R01_cb8564_c112351/flp0/2257 | NA                       | R01_cb8564_c112351/flp0/2257 | R01_cb8564_c112351/flp0/2257 | NA                          |
| R01_cb146_c3/flp0/4949       | NA                       | NA                           | NA                           | R01_cb146_c3/flp0/4949      |
| R01_cb2501_c31/flp0/1967     | NA                       | R01_cb2501_c31/flp0/1967     | NA                           | NA                          |
| R01_cb8564_c3707/flp0/3217   | NA                       | NA                           | NA                           | R01_cb8564_c3707/flp0/3217  |
| R01_cb10022_c4/flp0/925      | R01_cb10022_c4/flp0/925  | R01_cb10022_c4/flp0/925      | NA                           | NA                          |
| R01_cb3046_c7/flp0/3074      | NA                       | NA                           | NA                           | R01_cb3046_c7/flp0/3074     |
| R01_cb12240_c9/flp0/570      | R01_cb12240_c9/flp0/570  | R01_cb12240_c9/flp0/570      | NA                           | NA                          |
| R01_cb5640_c2/flp0/2174      | NA                       | NA                           | NA                           | R01_cb5640_c2/flp0/2174     |
| R01_cb14648_c8/flp0/855      | NA                       | R01_cb14648_c8/flp0/855      | R01_cb14648_c8/flp0/855      | NA                          |
| R01_cb8564_c52388/flp0/4989  | NA                       | R01_cb8564_c52388/flp0/4989  | NA                           | NA                          |
| R01_cb15811_c31/flp0/980     | NA                       | R01_cb15811_c31/flp0/980     | R01_cb15811_c31/flp0/980     | R01_cb15811_c31/flp0/980    |
| R01_cb3929_c15/flp0/2722     | R01_cb3929_c15/flp0/2722 | R01_cb3929_c15/flp0/2722     | R01_cb3929_c15/flp0/2722     | R01_cb3929_c15/flp0/2722    |
| R01_cb5469_c10/flp0/2248     | NA                       | R01_cb5469_c10/flp0/2248     | NA                           | NA                          |
| R01_cb10849_c9/flp0/1005     | NA                       | R01_cb10849_c9/flp0/1005     | NA                           | R01_cb10849_c9/flp0/1005    |
| R01_cb6163_c11/flp0/2243     | R01_cb6163_c11/flp0/2243 | R01_cb6163_c11/flp0/2243     | NA                           | NA                          |

|                             |                          |                             |                            |                            |
|-----------------------------|--------------------------|-----------------------------|----------------------------|----------------------------|
| R01_cb3637_c1/flp0/3433     | NA                       | R01_cb3637_c1/flp0/3433     | NA                         | NA                         |
| R01_cb14223_c4/flp0/1205    | NA                       | R01_cb14223_c4/flp0/1205    | NA                         | NA                         |
| R01_cb14514_c0/flp0/1755    | NA                       | R01_cb14514_c0/flp0/1755    | NA                         | NA                         |
| R01_cb15132_c1/flp0/798     | NA                       | R01_cb15132_c1/flp0/798     | NA                         | NA                         |
| R01_cb18409_c142/flp1/1127  | NA                       | R01_cb18409_c142/flp1/1127  | NA                         | NA                         |
| R01_cb10797_c3/flp0/712     | NA                       | R01_cb10797_c3/flp0/712     | NA                         | R01_cb10797_c3/flp0/712    |
| R01_cb3142_c0/f2p0/3395     | R01_cb3142_c0/f2p0/3395  | R01_cb3142_c0/f2p0/3395     | NA                         | NA                         |
| R01_cb17266_c4/flp0/990     | NA                       | R01_cb17266_c4/flp0/990     | R01_cb17266_c4/flp0/990    | R01_cb17266_c4/flp0/990    |
| R01_cb9038_c6/flp0/1957     | NA                       | R01_cb9038_c6/flp0/1957     | NA                         | NA                         |
| R01_cb8379_c5/flp1/2387     | NA                       | R01_cb8379_c5/flp1/2387     | NA                         | NA                         |
| R01_cb18456_c7233/flp0/575  | NA                       | R01_cb18456_c7233/flp0/575  | R01_cb18456_c7233/flp0/575 | R01_cb18456_c7233/flp0/575 |
| R01_cb7219_c2/f5p3/2591     | NA                       | NA                          | NA                         | R01_cb7219_c2/f5p3/2591    |
| R01_cb10029_c103/flp6/796   | NA                       | R01_cb10029_c103/flp6/796   | NA                         | NA                         |
| R01_cb14181_c0/f6p0/526     | NA                       | NA                          | NA                         | R01_cb14181_c0/f6p0/526    |
| R01_cb13724_c4/flp0/429     | NA                       | NA                          | R01_cb13724_c4/flp0/429    | R01_cb13724_c4/flp0/429    |
| R01_cb4536_c6/flp0/1015     | NA                       | NA                          | NA                         | R01_cb4536_c6/flp0/1015    |
| R01_cb14521_c0/f2p0/753     | NA                       | NA                          | NA                         | R01_cb14521_c0/f2p0/753    |
| R01_cb3176_c2/flp0/3696     | NA                       | R01_cb3176_c2/flp0/3696     | NA                         | NA                         |
| R01_cb8564_c24824/flp0/4019 | NA                       | R01_cb8564_c24824/flp0/4019 | NA                         | NA                         |
| R01_cb11742_c1/flp0/3299    | R01_cb11742_c1/flp0/3299 | R01_cb11742_c1/flp0/3299    | NA                         | NA                         |
| R01_cb5351_c2/flp0/1682     | NA                       | R01_cb5351_c2/flp0/1682     | NA                         | R01_cb5351_c2/flp0/1682    |
| R01_cb11439_c0/flp0/499     | R01_cb11439_c0/flp0/499  | R01_cb11439_c0/flp0/499     | R01_cb11439_c0/flp0/499    | R01_cb11439_c0/flp0/499    |
| R01_cb8564_c48286/flp0/1988 | NA                       | R01_cb8564_c48286/flp0/1988 | NA                         | NA                         |
| R01_cb9119_c4/flp0/2214     | NA                       | NA                          | NA                         | R01_cb9119_c4/flp0/2214    |
| R01_cb7877_c3/flp0/2308     | NA                       | R01_cb7877_c3/flp0/2308     | R01_cb7877_c3/flp0/2308    | R01_cb7877_c3/flp0/2308    |
| R01_cb2200_c5/flp1/501      | NA                       | R01_cb2200_c5/flp1/501      | NA                         | R01_cb2200_c5/flp1/501     |

|                             |                             |                             |                             |                             |
|-----------------------------|-----------------------------|-----------------------------|-----------------------------|-----------------------------|
| R01_cb5703_c0/flp0/3031     | NA                          | R01_cb5703_c0/flp0/3031     | R01_cb5703_c0/flp0/3031     | R01_cb5703_c0/flp0/3031     |
| R01_cb11141_c4/flp0/1912    | NA                          | NA                          | NA                          | R01_cb11141_c4/flp0/1912    |
| R01_cb16839_c2/flp0/1628    | NA                          | NA                          | NA                          | R01_cb16839_c2/flp0/1628    |
| R01_cb15701_c3/flp0/1551    | NA                          | R01_cb15701_c3/flp0/1551    | NA                          | R01_cb15701_c3/flp0/1551    |
| R01_cb10229_c3/flp0/2205    | R01_cb10229_c3/flp0/2205    | R01_cb10229_c3/flp0/2205    | NA                          | R01_cb10229_c3/flp0/2205    |
| R01_cb4280_c1/flp0/3387     | NA                          | R01_cb4280_c1/flp0/3387     | R01_cb4280_c1/flp0/3387     | R01_cb4280_c1/flp0/3387     |
| R01_cb8564_c18306/flp0/2224 | R01_cb8564_c18306/flp0/2224 | R01_cb8564_c18306/flp0/2224 | R01_cb8564_c18306/flp0/2224 | R01_cb8564_c18306/flp0/2224 |
| R01_cb1473_c4/flp0/2367     | NA                          | R01_cb1473_c4/flp0/2367     | R01_cb1473_c4/flp0/2367     | R01_cb1473_c4/flp0/2367     |
| R01_cb18301_c18/flp0/1613   | NA                          | R01_cb18301_c18/flp0/1613   | R01_cb18301_c18/flp0/1613   | NA                          |
| R01_cb13892_c7/flp0/838     | NA                          | R01_cb13892_c7/flp0/838     | NA                          | NA                          |
| R01_cb10196_c2/flp0/609     | NA                          | NA                          | NA                          | R01_cb10196_c2/flp0/609     |
| R01_cb1824_c2/flp1/3327     | NA                          | R01_cb1824_c2/flp1/3327     | NA                          | NA                          |
| R01_cb15462_c1/flp0/1238    | NA                          | R01_cb15462_c1/flp0/1238    | R01_cb15462_c1/flp0/1238    | NA                          |
| R01_cb16504_c4/flp0/1795    | NA                          | NA                          | NA                          | R01_cb16504_c4/flp0/1795    |
| R01_cb12863_c0/f2p0/451     | R01_cb12863_c0/f2p0/451     | NA                          | NA                          | R01_cb12863_c0/f2p0/451     |
| R01_cb13497_c12/fl6p1/856   | NA                          | NA                          | NA                          | R01_cb13497_c12/fl6p1/856   |
| R01_cb10600_c1/flp0/3337    | NA                          | R01_cb10600_c1/flp0/3337    | R01_cb10600_c1/flp0/3337    | R01_cb10600_c1/flp0/3337    |
| R01_cb8564_c31823/f8p0/2321 | NA                          | NA                          | NA                          | R01_cb8564_c31823/f8p0/2321 |
| R01_cb13910_c1/f6p0/1533    | NA                          | R01_cb13910_c1/f6p0/1533    | R01_cb13910_c1/f6p0/1533    | R01_cb13910_c1/f6p0/1533    |
| R01_cb9928_c6/flp0/2054     | NA                          | NA                          | NA                          | R01_cb9928_c6/flp0/2054     |
| R01_cb12584_c2/flp0/1188    | NA                          | NA                          | NA                          | R01_cb12584_c2/flp0/1188    |
| R01_cb478_c21/flp0/2997     | NA                          | NA                          | NA                          | R01_cb478_c21/flp0/2997     |
| R01_cb14153_c1/flp0/683     | R01_cb14153_c1/flp0/683     | R01_cb14153_c1/flp0/683     | R01_cb14153_c1/flp0/683     | R01_cb14153_c1/flp0/683     |
| R01_cb10668_c10/flp0/636    | NA                          | R01_cb10668_c10/flp0/636    | NA                          | NA                          |
| R01_cb8564_c115114/flp0/195 | NA                          | R01_cb8564_c115114/flp0/195 | NA                          | NA                          |

|                           |                           |                           |                          |                           |
|---------------------------|---------------------------|---------------------------|--------------------------|---------------------------|
| 9                         |                           | 9                         |                          |                           |
| R01_cb13910_c6/flp0/1579  | NA                        | R01_cb13910_c6/flp0/1579  | R01_cb13910_c6/flp0/1579 | R01_cb13910_c6/flp0/1579  |
| R01_cb3320_c11/flp0/2373  | NA                        | R01_cb3320_c11/flp0/2373  | R01_cb3320_c11/flp0/2373 | R01_cb3320_c11/flp0/2373  |
| R01_cb12221_c1/flp0/643   | R01_cb12221_c1/flp0/643   | R01_cb12221_c1/flp0/643   | R01_cb12221_c1/flp0/643  | NA                        |
| R01_cb16341_c10/flp0/863  | NA                        | R01_cb16341_c10/flp0/863  | R01_cb16341_c10/flp0/863 | R01_cb16341_c10/flp0/863  |
| R01_cb7506_c1/flp0/2365   | NA                        | NA                        | NA                       | R01_cb7506_c1/flp0/2365   |
| R01_cb4576_c129/flp0/2318 | R01_cb4576_c129/flp0/2318 | R01_cb4576_c129/flp0/2318 | NA                       | R01_cb4576_c129/flp0/2318 |
| R01_cb2838_c6/flp0/2525   | NA                        | R01_cb2838_c6/flp0/2525   | NA                       | NA                        |
| R01_cb11676_c0/flp0/1279  | NA                        | NA                        | NA                       | R01_cb11676_c0/flp0/1279  |
| R01_cb7735_c7/flp0/1232   | NA                        | R01_cb7735_c7/flp0/1232   | NA                       | R01_cb7735_c7/flp0/1232   |
| R01_cb13696_c3/flp0/1110  | NA                        | NA                        | NA                       | R01_cb13696_c3/flp0/1110  |
| R01_cb18084_c0/flp0/898   | NA                        | R01_cb18084_c0/flp0/898   | NA                       | NA                        |
| R01_cb13485_c4/flp0/675   | NA                        | R01_cb13485_c4/flp0/675   | NA                       | NA                        |
| R01_cb11430_c0/f2p0/693   | NA                        | R01_cb11430_c0/f2p0/693   | NA                       | R01_cb11430_c0/f2p0/693   |
| R01_cb17731_c1/flp0/625   | NA                        | R01_cb17731_c1/flp0/625   | NA                       | NA                        |
| R01_cb8710_c11/flp0/2201  | NA                        | NA                        | NA                       | R01_cb8710_c11/flp0/2201  |
| R01_cb10208_c1/flp0/2821  | NA                        | R01_cb10208_c1/flp0/2821  | NA                       | NA                        |
| R01_cb13151_c1/flp0/1812  | R01_cb13151_c1/flp0/1812  | R01_cb13151_c1/flp0/1812  | NA                       | NA                        |
| R01_cb18409_c68/flp0/356  | R01_cb18409_c68/flp0/356  | R01_cb18409_c68/flp0/356  | R01_cb18409_c68/flp0/356 | R01_cb18409_c68/flp0/356  |
| R01_cb17254_c1/flp0/925   | R01_cb17254_c1/flp0/925   | R01_cb17254_c1/flp0/925   | R01_cb17254_c1/flp0/925  | R01_cb17254_c1/flp0/925   |
| R01_cb1095_c15/flp1/5852  | NA                        | NA                        | NA                       | R01_cb1095_c15/flp1/5852  |
| R01_cb10111_c3/flp0/1907  | NA                        | R01_cb10111_c3/flp0/1907  | NA                       | NA                        |
| R01_cb206_c7/flp0/3217    | NA                        | R01_cb206_c7/flp0/3217    | NA                       | NA                        |
| R01_cb502_c11/f2p0/2142   | R01_cb502_c11/f2p0/2142   | R01_cb502_c11/f2p0/2142   | NA                       | NA                        |
| R01_cb5536_c0/flp0/3079   | NA                        | R01_cb5536_c0/flp0/3079   | NA                       | NA                        |
| R01_cb12023_c0/fl4p0/695  | NA                        | R01_cb12023_c0/fl4p0/695  | NA                       | R01_cb12023_c0/fl4p0/695  |

|                             |                                  |                             |                          |                           |
|-----------------------------|----------------------------------|-----------------------------|--------------------------|---------------------------|
| R01_cb10043_c13/flp0/1036   | NA                               | NA                          | NA                       | R01_cb10043_c13/flp0/1036 |
| R01_cb18456_c6761/flp0/744  | R01_cb18456_c6761/flp0/744       | R01_cb18456_c6761/flp0/744  | NA                       | NA                        |
| R01_cb8786_c5/flp0/1325     | NA                               | NA                          | NA                       | R01_cb8786_c5/flp0/1325   |
| R01_cb8564_c87747/flp0/3271 | R01_cb8564_c87747/flp0/3271<br>1 | R01_cb8564_c87747/flp0/3271 | NA                       | NA                        |
| R01_cb16747_c4/flp0/1508    | NA                               | NA                          | NA                       | R01_cb16747_c4/flp0/1508  |
| R01_cb4085_c0/flp0/3440     | NA                               | R01_cb4085_c0/flp0/3440     | NA                       | NA                        |
| R01_cb8564_c17982/flp0/3250 | NA                               | R01_cb8564_c17982/flp0/3250 | NA                       | NA                        |
| R01_cb12176_c2/flp0/1520    | R01_cb12176_c2/flp0/1520         | R01_cb12176_c2/flp0/1520    | NA                       | R01_cb12176_c2/flp0/1520  |
| R01_cb16459_c3/flp1/619     | R01_cb16459_c3/flp1/619          | R01_cb16459_c3/flp1/619     | NA                       | NA                        |
| R01_cb6608_c20/f4p1/2518    | NA                               | NA                          | NA                       | R01_cb6608_c20/f4p1/2518  |
| R01_cb14120_c1/flp0/1017    | NA                               | NA                          | NA                       | R01_cb14120_c1/flp0/1017  |
| R01_cb3074_c3/flp0/1052     | NA                               | NA                          | NA                       | R01_cb3074_c3/flp0/1052   |
| R01_cb11714_c1/flp0/3415    | R01_cb11714_c1/flp0/3415         | R01_cb11714_c1/flp0/3415    | R01_cb11714_c1/flp0/3415 | R01_cb11714_c1/flp0/3415  |
| R01_cb5208_c4/flp0/3236     | NA                               | NA                          | NA                       | R01_cb5208_c4/flp0/3236   |
| R01_cb15745_c5/f3p0/1126    | NA                               | R01_cb15745_c5/f3p0/1126    | R01_cb15745_c5/f3p0/1126 | R01_cb15745_c5/f3p0/1126  |
| R01_cb18568_c1/flp0/638     | R01_cb18568_c1/flp0/638          | NA                          | NA                       | R01_cb18568_c1/flp0/638   |
| R01_cb13449_c9/flp0/712     | NA                               | NA                          | NA                       | R01_cb13449_c9/flp0/712   |
| R01_cb14565_c0/f2p0/922     | NA                               | NA                          | NA                       | R01_cb14565_c0/f2p0/922   |
| R01_cb17181_c7/flp0/1391    | R01_cb17181_c7/flp0/1391         | R01_cb17181_c7/flp0/1391    | R01_cb17181_c7/flp0/1391 | R01_cb17181_c7/flp0/1391  |
| R01_cb11017_c5/flp0/1431    | NA                               | R01_cb11017_c5/flp0/1431    | R01_cb11017_c5/flp0/1431 | R01_cb11017_c5/flp0/1431  |
| R01_cb18456_c6660/flp0/506  | NA                               | R01_cb18456_c6660/flp0/506  | NA                       | NA                        |
| R01_cb3138_c7/flp0/629      | NA                               | NA                          | NA                       | R01_cb3138_c7/flp0/629    |
| R01_cb10768_c4/flp0/1853    | R01_cb10768_c4/flp0/1853         | R01_cb10768_c4/flp0/1853    | NA                       | R01_cb10768_c4/flp0/1853  |
| R01_cb14356_c3/flp0/1612    | NA                               | R01_cb14356_c3/flp0/1612    | NA                       | NA                        |
| R01_cb13449_c10/flp0/868    | NA                               | NA                          | NA                       | R01_cb13449_c10/flp0/868  |

|                              |                             |                             |                            |                              |
|------------------------------|-----------------------------|-----------------------------|----------------------------|------------------------------|
| R01_cb16206_c1/f1p0/1549     | NA                          | NA                          | NA                         | R01_cb16206_c1/f1p0/1549     |
| R01_cb11646_c0/f2p0/1800     | NA                          | NA                          | NA                         | R01_cb11646_c0/f2p0/1800     |
| R01_cb737_c48/f1p0/609       | R01_cb737_c48/f1p0/609      | R01_cb737_c48/f1p0/609      | R01_cb737_c48/f1p0/609     | R01_cb737_c48/f1p0/609       |
| R01_cb6706_c3/f2p0/1553      | NA                          | NA                          | NA                         | R01_cb6706_c3/f2p0/1553      |
| R01_cb1739_c13/f1p1/5711     | NA                          | NA                          | NA                         | R01_cb1739_c13/f1p1/5711     |
| R01_cb11048_c0/f1p0/1242     | R01_cb11048_c0/f1p0/1242    | R01_cb11048_c0/f1p0/1242    | R01_cb11048_c0/f1p0/1242   | R01_cb11048_c0/f1p0/1242     |
| R01_cb8564_c10684/f1p0/3561  | R01_cb8564_c10684/f1p0/3561 | R01_cb8564_c10684/f1p0/3561 | NA                         | R01_cb8564_c10684/f1p0/3561  |
| R01_cb16645_c56/f1p0/1670    | NA                          | R01_cb16645_c56/f1p0/1670   | NA                         | NA                           |
| R01_cb14750_c0/f4p0/951      | NA                          | NA                          | NA                         | R01_cb14750_c0/f4p0/951      |
| R01_cb8080_c2/f1p0/2442      | NA                          | NA                          | R01_cb8080_c2/f1p0/2442    | NA                           |
| R01_cb16367_c6/f1p0/523      | R01_cb16367_c6/f1p0/523     | NA                          | NA                         | NA                           |
| R01_cb11652_c1/f1p0/3207     | NA                          | R01_cb11652_c1/f1p0/3207    | NA                         | NA                           |
| R01_cb12610_c1/f1p0/813      | NA                          | NA                          | NA                         | R01_cb12610_c1/f1p0/813      |
| R01_cb8564_c1855/f1p0/2496   | R01_cb8564_c1855/f1p0/2496  | R01_cb8564_c1855/f1p0/2496  | R01_cb8564_c1855/f1p0/2496 | R01_cb8564_c1855/f1p0/2496   |
| R01_cb17437_c0/f2p0/867      | NA                          | R01_cb17437_c0/f2p0/867     | NA                         | R01_cb17437_c0/f2p0/867      |
| R01_cb18494_c0/f1p0/1412     | NA                          | R01_cb18494_c0/f1p0/1412    | R01_cb18494_c0/f1p0/1412   | R01_cb18494_c0/f1p0/1412     |
| R01_cb8564_c21103/f4p0/2248  | R01_cb8564_c21103/f4p0/2248 | R01_cb8564_c21103/f4p0/2248 | NA                         | R01_cb8564_c21103/f4p0/2248  |
| R01_cb8564_c2610/f1p0/2831   | R01_cb8564_c2610/f1p0/2831  | R01_cb8564_c2610/f1p0/2831  | NA                         | R01_cb8564_c2610/f1p0/2831   |
| R01_cb15574_c6/f2p0/530      | NA                          | NA                          | R01_cb15574_c6/f2p0/530    | R01_cb15574_c6/f2p0/530      |
| R01_cb6616_c7/f1p0/1644      | NA                          | NA                          | R01_cb6616_c7/f1p0/1644    | R01_cb6616_c7/f1p0/1644      |
| R01_cb3922_c22/f1p1/1626     | NA                          | R01_cb3922_c22/f1p1/1626    | NA                         | NA                           |
| R01_cb8564_c119962/f1p0/2258 | NA                          | NA                          | NA                         | R01_cb8564_c119962/f1p0/2258 |
| R01_cb2765_c11/f3p0/3044     | NA                          | NA                          | NA                         | R01_cb2765_c11/f3p0/3044     |

|                              |                              |                              |                              |                              |
|------------------------------|------------------------------|------------------------------|------------------------------|------------------------------|
| R01_cb8865_c4/f1p0/2090      | NA                           | NA                           | NA                           | R01_cb8865_c4/f1p0/2090      |
| R01_cb6706_c0/f5p0/2760      | NA                           | R01_cb6706_c0/f5p0/2760      | R01_cb6706_c0/f5p0/2760      | R01_cb6706_c0/f5p0/2760      |
| R01_cb8564_c86340/f2p0/2725  | NA                           | NA                           | R01_cb8564_c86340/f2p0/2725  | R01_cb8564_c86340/f2p0/2725  |
| R01_cb11106_c0/f2p0/1739     | NA                           | NA                           | NA                           | R01_cb11106_c0/f2p0/1739     |
| R01_cb10783_c0/f8p0/461      | R01_cb10783_c0/f8p0/461      | R01_cb10783_c0/f8p0/461      | R01_cb10783_c0/f8p0/461      | R01_cb10783_c0/f8p0/461      |
| R01_cb3632_c2/f1p0/2876      | NA                           | R01_cb3632_c2/f1p0/2876      | NA                           | R01_cb3632_c2/f1p0/2876      |
| R01_cb8564_c14260/f1p0/2798  | NA                           | R01_cb8564_c14260/f1p0/2798  | NA                           | NA                           |
| R01_cb8564_c17117/f1p0/4269  | NA                           | R01_cb8564_c17117/f1p0/4269  | NA                           | NA                           |
| R01_cb507_c3/f1p0/2874       | NA                           | R01_cb507_c3/f1p0/2874       | NA                           | R01_cb507_c3/f1p0/2874       |
| R01_cb10238_c2/f1p0/3142     | NA                           | R01_cb10238_c2/f1p0/3142     | NA                           | NA                           |
| R01_cb8564_c129409/f1p0/2483 | NA                           | R01_cb8564_c129409/f1p0/2483 | NA                           | R01_cb8564_c129409/f1p0/2483 |
| R01_cb11458_c1/f1p0/2593     | NA                           | R01_cb11458_c1/f1p0/2593     | R01_cb11458_c1/f1p0/2593     | R01_cb11458_c1/f1p0/2593     |
| R01_cb9324_c6/f2p0/1934      | NA                           | R01_cb9324_c6/f2p0/1934      | NA                           | NA                           |
| R01_cb15851_c0/f1p0/996      | NA                           | R01_cb15851_c0/f1p0/996      | NA                           | NA                           |
| R01_cb8310_c3/f1p0/2269      | NA                           | R01_cb8310_c3/f1p0/2269      | R01_cb8310_c3/f1p0/2269      | R01_cb8310_c3/f1p0/2269      |
| R01_cb10321_c2/f1p0/2281     | R01_cb10321_c2/f1p0/2281     | R01_cb10321_c2/f1p0/2281     | R01_cb10321_c2/f1p0/2281     | R01_cb10321_c2/f1p0/2281     |
| R01_cb9662_c1/f1p0/1913      | NA                           | NA                           | NA                           | R01_cb9662_c1/f1p0/1913      |
| R01_cb2737_c22/f1p0/3196     | NA                           | R01_cb2737_c22/f1p0/3196     | NA                           | NA                           |
| R01_cb17498_c1/f1p0/855      | NA                           | NA                           | NA                           | R01_cb17498_c1/f1p0/855      |
| R01_cb8564_c123647/f1p0/1917 | R01_cb8564_c123647/f1p0/1917 | R01_cb8564_c123647/f1p0/1917 | R01_cb8564_c123647/f1p0/1917 | R01_cb8564_c123647/f1p0/1917 |
| R01_cb2101_c8/f1p0/1743      | NA                           | R01_cb2101_c8/f1p0/1743      | R01_cb2101_c8/f1p0/1743      | R01_cb2101_c8/f1p0/1743      |
| R01_cb13836_c0/f1p0/432      | R01_cb13836_c0/f1p0/432      | R01_cb13836_c0/f1p0/432      | NA                           | NA                           |
| R01_cb3391_c6/f1p0/2647      | R01_cb3391_c6/f1p0/2647      | R01_cb3391_c6/f1p0/2647      | R01_cb3391_c6/f1p0/2647      | NA                           |
| R01_cb8040_c12/f1p0/1866     | NA                           | R01_cb8040_c12/f1p0/1866     | R01_cb8040_c12/f1p0/1866     | R01_cb8040_c12/f1p0/1866     |

|                              |                             |                             |                             |                              |
|------------------------------|-----------------------------|-----------------------------|-----------------------------|------------------------------|
| R01_cb13134_c10/f3p0/1178    | NA                          | NA                          | NA                          | R01_cb13134_c10/f3p0/1178    |
| R01_cb13880_c4/f1p0/681      | R01_cb13880_c4/f1p0/681     | R01_cb13880_c4/f1p0/681     | R01_cb13880_c4/f1p0/681     | R01_cb13880_c4/f1p0/681      |
| R01_cb7595_c20/f1p0/730      | NA                          | R01_cb7595_c20/f1p0/730     | NA                          | R01_cb7595_c20/f1p0/730      |
| R01_cb17819_c0/f2p0/1164     | NA                          | NA                          | NA                          | R01_cb17819_c0/f2p0/1164     |
| R01_cb2588_c2/f1p0/661       | NA                          | R01_cb2588_c2/f1p0/661      | R01_cb2588_c2/f1p0/661      | R01_cb2588_c2/f1p0/661       |
| R01_cb1119_c5/f1p0/2355      | NA                          | R01_cb1119_c5/f1p0/2355     | NA                          | NA                           |
| R01_cb8128_c0/f1p0/2447      | R01_cb8128_c0/f1p0/2447     | R01_cb8128_c0/f1p0/2447     | R01_cb8128_c0/f1p0/2447     | R01_cb8128_c0/f1p0/2447      |
| R01_cb10993_c3/f1p0/1477     | NA                          | NA                          | NA                          | R01_cb10993_c3/f1p0/1477     |
| R01_cb9841_c3/f1p0/1798      | NA                          | NA                          | NA                          | R01_cb9841_c3/f1p0/1798      |
| R01_cb4471_c7/f1p0/2973      | NA                          | NA                          | NA                          | R01_cb4471_c7/f1p0/2973      |
| R01_cb16720_c0/f2p0/1444     | NA                          | NA                          | NA                          | R01_cb16720_c0/f2p0/1444     |
| R01_cb15659_c0/f1p0/1491     | NA                          | NA                          | NA                          | R01_cb15659_c0/f1p0/1491     |
| R01_cb826_c7/f1p0/2574       | NA                          | R01_cb826_c7/f1p0/2574      | R01_cb826_c7/f1p0/2574      | R01_cb826_c7/f1p0/2574       |
| R01_cb13165_c0/f2p0/487      | NA                          | R01_cb13165_c0/f2p0/487     | NA                          | NA                           |
| R01_cb8564_c116311/f1p0/4078 | NA                          | NA                          | NA                          | R01_cb8564_c116311/f1p0/4078 |
| R01_cb18456_c6462/f1p0/735   | R01_cb18456_c6462/f1p0/735  | R01_cb18456_c6462/f1p0/735  | NA                          | NA                           |
| R01_cb14523_c1/f1p0/758      | NA                          | NA                          | NA                          | R01_cb14523_c1/f1p0/758      |
| R01_cb18456_c7176/f1p0/1692  | R01_cb18456_c7176/f1p0/1692 | R01_cb18456_c7176/f1p0/1692 | R01_cb18456_c7176/f1p0/1692 | NA                           |
| R01_cb945_c11/f1p0/3380      | NA                          | R01_cb945_c11/f1p0/3380     | NA                          | NA                           |
| R01_cb3065_c1/f1p0/3738      | R01_cb3065_c1/f1p0/3738     | R01_cb3065_c1/f1p0/3738     | NA                          | NA                           |
| R01_cb17527_c1/f1p0/389      | R01_cb17527_c1/f1p0/389     | R01_cb17527_c1/f1p0/389     | R01_cb17527_c1/f1p0/389     | R01_cb17527_c1/f1p0/389      |
| R01_cb8564_c80459/f1p0/2346  | R01_cb8564_c80459/f1p0/2346 | R01_cb8564_c80459/f1p0/2346 | R01_cb8564_c80459/f1p0/2346 | R01_cb8564_c80459/f1p0/2346  |
| R01_cb1938_c7/f1p0/2462      | NA                          | NA                          | NA                          | R01_cb1938_c7/f1p0/2462      |



|                                  |                         |                          |                           |                                  |
|----------------------------------|-------------------------|--------------------------|---------------------------|----------------------------------|
| R01_cb16172_c0/flp0/1837         | NA                      | R01_cb16172_c0/flp0/1837 | R01_cb16172_c0/flp0/1837  | NA                               |
| R01_cb6377_c4/flp0/2670          | NA                      | NA                       | NA                        | R01_cb6377_c4/flp0/2670          |
| R01_cb9473_c10/flp0/998          | NA                      | R01_cb9473_c10/flp0/998  | R01_cb9473_c10/flp0/998   | NA                               |
| R01_cb18373_c1/flp0/705          | R01_cb18373_c1/flp0/705 | R01_cb18373_c1/flp0/705  | R01_cb18373_c1/flp0/705   | R01_cb18373_c1/flp0/705          |
| R01_cb12369_c11/f66p0/601        | NA                      | NA                       | R01_cb12369_c11/f66p0/601 | NA                               |
| R01_cb17402_c1/flp0/911          | NA                      | NA                       | NA                        | R01_cb17402_c1/flp0/911          |
| R01_cb1_c15/f3p0/2120            | NA                      | NA                       | NA                        | R01_cb1_c15/f3p0/2120            |
| R01_cb8564_c12484/flp0/2841      | NA                      | NA                       | NA                        | R01_cb8564_c12484/flp0/2841      |
| R01_cb10104_c0/f5p0/1085         | NA                      | NA                       | NA                        | R01_cb10104_c0/f5p0/1085         |
| R01_cb15260_c5/flp0/604          | R01_cb15260_c5/flp0/604 | R01_cb15260_c5/flp0/604  | NA                        | NA                               |
| R01_cb8564_c115447/flp0/238<br>6 | NA                      | NA                       | NA                        | R01_cb8564_c115447/flp0/238<br>6 |
| R01_cb10398_c20/fl2p0/721        | NA                      | NA                       | NA                        | R01_cb10398_c20/fl2p0/721        |
| R01_cb1119_c4/flp1/4438          | NA                      | R01_cb1119_c4/flp1/4438  | NA                        | NA                               |
| R01_cb8672_c7/flp0/1868          | NA                      | R01_cb8672_c7/flp0/1868  | R01_cb8672_c7/flp0/1868   | R01_cb8672_c7/flp0/1868          |
| R01_cb7035_c0/f2p0/2711          | NA                      | R01_cb7035_c0/f2p0/2711  | R01_cb7035_c0/f2p0/2711   | NA                               |
| R01_cb13811_c6/flp0/1104         | NA                      | R01_cb13811_c6/flp0/1104 | NA                        | NA                               |
| R01_cb416_c23/flp0/2818          | NA                      | R01_cb416_c23/flp0/2818  | NA                        | NA                               |
| R01_cb3359_c21/flp0/3156         | NA                      | R01_cb3359_c21/flp0/3156 | NA                        | NA                               |
| R01_cb3568_c4/flp0/2044          | NA                      | R01_cb3568_c4/flp0/2044  | NA                        | NA                               |
| R01_cb13996_c5/flp0/819          | NA                      | R01_cb13996_c5/flp0/819  | NA                        | NA                               |
| R01_cb3563_c7/flp0/2009          | NA                      | NA                       | NA                        | R01_cb3563_c7/flp0/2009          |
| R01_cb6719_c18/flp0/2795         | NA                      | R01_cb6719_c18/flp0/2795 | R01_cb6719_c18/flp0/2795  | NA                               |
| R01_cb15618_c1/flp0/961          | NA                      | NA                       | NA                        | R01_cb15618_c1/flp0/961          |
| R01_cb14656_c9/flp0/459          | R01_cb14656_c9/flp0/459 | R01_cb14656_c9/flp0/459  | R01_cb14656_c9/flp0/459   | R01_cb14656_c9/flp0/459          |
| R01_cb11038_c0/f3p0/1047         | NA                      | NA                       | NA                        | R01_cb11038_c0/f3p0/1047         |

|                              |                             |                              |                              |                              |
|------------------------------|-----------------------------|------------------------------|------------------------------|------------------------------|
| R01_cb14576_c7/flp0/1516     | NA                          | R01_cb14576_c7/flp0/1516     | R01_cb14576_c7/flp0/1516     | R01_cb14576_c7/flp0/1516     |
| R01_cb18344_c1/f2p0/630      | NA                          | NA                           | NA                           | R01_cb18344_c1/f2p0/630      |
| R01_cb7329_c2/flp0/2646      | R01_cb7329_c2/flp0/2646     | R01_cb7329_c2/flp0/2646      | NA                           | NA                           |
| R01_cb2492_c1/flp0/1945      | NA                          | NA                           | NA                           | R01_cb2492_c1/flp0/1945      |
| R01_cb7962_c5/flp0/2184      | NA                          | NA                           | NA                           | R01_cb7962_c5/flp0/2184      |
| R01_cb8564_c122202/flp1/1935 | NA                          | NA                           | R01_cb8564_c122202/flp1/1935 | R01_cb8564_c122202/flp1/1935 |
| R01_cb647_c8/flp0/1962       | NA                          | R01_cb647_c8/flp0/1962       | NA                           | R01_cb647_c8/flp0/1962       |
| R01_cb11799_c12/f2p0/1161    | NA                          | R01_cb11799_c12/f2p0/1161    | NA                           | NA                           |
| R01_cb4169_c15/flp0/1203     | NA                          | NA                           | NA                           | R01_cb4169_c15/flp0/1203     |
| R01_cb8564_c71066/flp0/2382  | NA                          | R01_cb8564_c71066/flp0/2382  | NA                           | NA                           |
| R01_cb8564_c113186/flp0/2216 | NA                          | R01_cb8564_c113186/flp0/2216 | NA                           | NA                           |
| R01_cb8564_c22746/flp0/2508  | NA                          | R01_cb8564_c22746/flp0/2508  | NA                           | NA                           |
| R01_cb13337_c4/flp0/1179     | NA                          | R01_cb13337_c4/flp0/1179     | NA                           | R01_cb13337_c4/flp0/1179     |
| R01_cb4824_c12/flp0/3203     | R01_cb4824_c12/flp0/3203    | R01_cb4824_c12/flp0/3203     | R01_cb4824_c12/flp0/3203     | R01_cb4824_c12/flp0/3203     |
| R01_cb8564_c53036/flp0/2917  | NA                          | NA                           | R01_cb8564_c53036/flp0/2917  | R01_cb8564_c53036/flp0/2917  |
| R01_cb8564_c17716/flp0/3028  | NA                          | R01_cb8564_c17716/flp0/3028  | NA                           | NA                           |
| R01_cb5900_c48/flp0/3487     | NA                          | R01_cb5900_c48/flp0/3487     | NA                           | R01_cb5900_c48/flp0/3487     |
| R01_cb10591_c6/flp0/690      | R01_cb10591_c6/flp0/690     | R01_cb10591_c6/flp0/690      | NA                           | R01_cb10591_c6/flp0/690      |
| R01_cb14706_c4/flp0/610      | R01_cb14706_c4/flp0/610     | NA                           | R01_cb14706_c4/flp0/610      | R01_cb14706_c4/flp0/610      |
| R01_cb13096_c22/flp0/624     | NA                          | R01_cb13096_c22/flp0/624     | NA                           | NA                           |
| R01_cb8564_c38917/flp0/3160  | R01_cb8564_c38917/flp0/3160 | R01_cb8564_c38917/flp0/3160  | R01_cb8564_c38917/flp0/3160  | R01_cb8564_c38917/flp0/3160  |
| R01_cb120_c10/flp0/2003      | NA                          | R01_cb120_c10/flp0/2003      | NA                           | R01_cb120_c10/flp0/2003      |
| R01_cb2223_c5/flp0/694       | R01_cb2223_c5/flp0/694      | R01_cb2223_c5/flp0/694       | R01_cb2223_c5/flp0/694       | R01_cb2223_c5/flp0/694       |

|                                  |                            |                                  |                             |                                  |
|----------------------------------|----------------------------|----------------------------------|-----------------------------|----------------------------------|
| R01_cb8564_c129713/flp0/232<br>2 | NA                         | R01_cb8564_c129713/flp0/232<br>2 | NA                          | R01_cb8564_c129713/flp0/232<br>2 |
| R01_cb15811_c7/f3p0/1029         | R01_cb15811_c7/f3p0/1029   | R01_cb15811_c7/f3p0/1029         | R01_cb15811_c7/f3p0/1029    | R01_cb15811_c7/f3p0/1029         |
| R01_cb2960_c1/flp0/3760          | NA                         | NA                               | NA                          | R01_cb2960_c1/flp0/3760          |
| R01_cb15814_c0/f5p1/1353         | NA                         | NA                               | NA                          | R01_cb15814_c0/f5p1/1353         |
| R01_cb2219_c8/flp1/1916          | NA                         | R01_cb2219_c8/flp1/1916          | NA                          | R01_cb2219_c8/flp1/1916          |
| R01_cb5841_c51/flp0/1108         | R01_cb5841_c51/flp0/1108   | R01_cb5841_c51/flp0/1108         | NA                          | NA                               |
| R01_cb8564_c4043/flp0/2276       | NA                         | NA                               | NA                          | R01_cb8564_c4043/flp0/2276       |
| R01_cb8564_c3242/flp0/2731       | R01_cb8564_c3242/flp0/2731 | R01_cb8564_c3242/flp0/2731       | R01_cb8564_c3242/flp0/2731  | NA                               |
| R01_cb16997_c108/flp0/2138       | NA                         | NA                               | NA                          | R01_cb16997_c108/flp0/2138       |
| R01_cb5905_c3/flp0/2087          | NA                         | R01_cb5905_c3/flp0/2087          | NA                          | NA                               |
| R01_cb6153_c1/f2p0/3052          | NA                         | NA                               | NA                          | R01_cb6153_c1/f2p0/3052          |
| R01_cb15386_c3/flp2/523          | NA                         | R01_cb15386_c3/flp2/523          | NA                          | R01_cb15386_c3/flp2/523          |
| R01_cb5229_c13/flp1/2074         | NA                         | NA                               | NA                          | R01_cb5229_c13/flp1/2074         |
| R01_cb8922_c1/flp0/2352          | R01_cb8922_c1/flp0/2352    | R01_cb8922_c1/flp0/2352          | R01_cb8922_c1/flp0/2352     | NA                               |
| R01_cb8564_c82779/flp0/2722      | NA                         | R01_cb8564_c82779/flp0/2722      | NA                          | R01_cb8564_c82779/flp0/2722      |
| R01_cb10358_c0/f3p0/883          | NA                         | NA                               | NA                          | R01_cb10358_c0/f3p0/883          |
| R01_cb4563_c27/flp0/2598         | NA                         | R01_cb4563_c27/flp0/2598         | NA                          | NA                               |
| R01_cb8564_c82232/flp1/3574      | NA                         | R01_cb8564_c82232/flp1/3574      | NA                          | NA                               |
| R01_cb416_c54/flp0/2035          | NA                         | R01_cb416_c54/flp0/2035          | NA                          | R01_cb416_c54/flp0/2035          |
| R01_cb8564_c74051/flp0/2917      | NA                         | R01_cb8564_c74051/flp0/2917      | R01_cb8564_c74051/flp0/2917 | R01_cb8564_c74051/flp0/2917      |
| R01_cb376_c2/flp0/2089           | NA                         | R01_cb376_c2/flp0/2089           | NA                          | NA                               |
| R01_cb10106_c5/flp1/824          | NA                         | R01_cb10106_c5/flp1/824          | NA                          | NA                               |
| R01_cb8564_c118391/flp0/211<br>5 | NA                         | R01_cb8564_c118391/flp0/211<br>5 | NA                          | NA                               |
| R01_cb16672_c2/flp0/665          | R01_cb16672_c2/flp0/665    | R01_cb16672_c2/flp0/665          | R01_cb16672_c2/flp0/665     | NA                               |

|                             |                             |                             |                             |                             |
|-----------------------------|-----------------------------|-----------------------------|-----------------------------|-----------------------------|
| R01_cb8564_c16718/f1p0/3257 | R01_cb8564_c16718/f1p0/3257 | R01_cb8564_c16718/f1p0/3257 | R01_cb8564_c16718/f1p0/3257 | R01_cb8564_c16718/f1p0/3257 |
| R01_cb9535_c28/f9p0/481     | NA                          | R01_cb9535_c28/f9p0/481     | R01_cb9535_c28/f9p0/481     | R01_cb9535_c28/f9p0/481     |
| R01_cb12110_c1/f1p1/622     | R01_cb12110_c1/f1p1/622     | R01_cb12110_c1/f1p1/622     | NA                          | R01_cb12110_c1/f1p1/622     |
| R01_cb11376_c0/f2p0/817     | R01_cb11376_c0/f2p0/817     | R01_cb11376_c0/f2p0/817     | R01_cb11376_c0/f2p0/817     | R01_cb11376_c0/f2p0/817     |
| R01_cb8564_c4653/f2p0/2778  | NA                          | R01_cb8564_c4653/f2p0/2778  | NA                          | R01_cb8564_c4653/f2p0/2778  |
| R01_cb6769_c18/f1p0/401     | R01_cb6769_c18/f1p0/401     | R01_cb6769_c18/f1p0/401     | R01_cb6769_c18/f1p0/401     | R01_cb6769_c18/f1p0/401     |
| R01_cb2030_c2/f1p0/4096     | NA                          | R01_cb2030_c2/f1p0/4096     | NA                          | R01_cb2030_c2/f1p0/4096     |
| R01_cb1676_c12/f1p0/5084    | NA                          | R01_cb1676_c12/f1p0/5084    | NA                          | NA                          |
| R01_cb654_c13/f1p0/623      | NA                          | R01_cb654_c13/f1p0/623      | NA                          | R01_cb654_c13/f1p0/623      |
| R01_cb12176_c0/f3p0/709     | NA                          | R01_cb12176_c0/f3p0/709     | NA                          | R01_cb12176_c0/f3p0/709     |
| R01_cb8564_c41314/f1p0/3957 | NA                          | NA                          | NA                          | R01_cb8564_c41314/f1p0/3957 |
| R01_cb8564_c52940/f1p2/3963 | NA                          | NA                          | NA                          | R01_cb8564_c52940/f1p2/3963 |
| R01_cb13743_c3/f1p1/1455    | NA                          | NA                          | NA                          | R01_cb13743_c3/f1p1/1455    |
| R01_cb18456_c6668/f1p0/485  | R01_cb18456_c6668/f1p0/485  | R01_cb18456_c6668/f1p0/485  | R01_cb18456_c6668/f1p0/485  | R01_cb18456_c6668/f1p0/485  |
| R01_cb1333_c27/f1p0/3280    | R01_cb1333_c27/f1p0/3280    | R01_cb1333_c27/f1p0/3280    | R01_cb1333_c27/f1p0/3280    | R01_cb1333_c27/f1p0/3280    |
| R01_cb10585_c0/f1p0/1616    | NA                          | R01_cb10585_c0/f1p0/1616    | NA                          | NA                          |
| R01_cb8564_c50208/f1p0/2195 | NA                          | R01_cb8564_c50208/f1p0/2195 | NA                          | NA                          |
| R01_cb8107_c1/f1p1/2459     | R01_cb8107_c1/f1p1/2459     | R01_cb8107_c1/f1p1/2459     | R01_cb8107_c1/f1p1/2459     | R01_cb8107_c1/f1p1/2459     |
| R01_cb10295_c0/f2p0/1574    | NA                          | R01_cb10295_c0/f2p0/1574    | NA                          | NA                          |
| R01_cb6885_c1/f2p0/1890     | NA                          | NA                          | NA                          | R01_cb6885_c1/f2p0/1890     |
| R01_cb4323_c0/f1p0/3380     | NA                          | NA                          | NA                          | R01_cb4323_c0/f1p0/3380     |
| R01_cb11595_c2/f1p0/707     | NA                          | R01_cb11595_c2/f1p0/707     | R01_cb11595_c2/f1p0/707     | NA                          |
| R01_cb8564_c19531/f1p0/1964 | NA                          | NA                          | NA                          | R01_cb8564_c19531/f1p0/1964 |
| R01_cb18409_c57/f1p0/427    | R01_cb18409_c57/f1p0/427    | R01_cb18409_c57/f1p0/427    | R01_cb18409_c57/f1p0/427    | R01_cb18409_c57/f1p0/427    |
| R01_cb10866_c5/f1p0/1274    | NA                          | R01_cb10866_c5/f1p0/1274    | NA                          | NA                          |

|                             |                         |                             |                             |                             |
|-----------------------------|-------------------------|-----------------------------|-----------------------------|-----------------------------|
| R01_cb14524_c1/flp0/1321    | NA                      | NA                          | NA                          | R01_cb14524_c1/flp0/1321    |
| R01_cb1178_c5/f2p0/1389     | NA                      | NA                          | NA                          | R01_cb1178_c5/f2p0/1389     |
| R01_cb1993_c2/flp1/4105     | NA                      | NA                          | NA                          | R01_cb1993_c2/flp1/4105     |
| R01_cb16896_c1/flp0/1445    | NA                      | R01_cb16896_c1/flp0/1445    | R01_cb16896_c1/flp0/1445    | R01_cb16896_c1/flp0/1445    |
| R01_cb10378_c0/f2p0/498     | R01_cb10378_c0/f2p0/498 | R01_cb10378_c0/f2p0/498     | NA                          | R01_cb10378_c0/f2p0/498     |
| R01_cb8539_c7/flp0/2209     | NA                      | R01_cb8539_c7/flp0/2209     | NA                          | NA                          |
| R01_cb5659_c102/f46p0/2178  | NA                      | NA                          | NA                          | R01_cb5659_c102/f46p0/2178  |
| R01_cb18535_c0/flp0/838     | NA                      | NA                          | NA                          | R01_cb18535_c0/flp0/838     |
| R01_cb12589_c6/f2p0/809     | NA                      | NA                          | NA                          | R01_cb12589_c6/f2p0/809     |
| R01_cb8564_c36735/flp2/2783 | NA                      | R01_cb8564_c36735/flp2/2783 | NA                          | NA                          |
| R01_cb9960_c6/flp0/1645     | NA                      | NA                          | NA                          | R01_cb9960_c6/flp0/1645     |
| R01_cb9334_c1/flp0/2106     | NA                      | R01_cb9334_c1/flp0/2106     | NA                          | NA                          |
| R01_cb8564_c89502/flp0/2946 | NA                      | R01_cb8564_c89502/flp0/2946 | NA                          | NA                          |
| R01_cb2644_c9/flp0/4119     | NA                      | R01_cb2644_c9/flp0/4119     | NA                          | R01_cb2644_c9/flp0/4119     |
| R01_cb18721_c1/flp0/1646    | NA                      | R01_cb18721_c1/flp0/1646    | NA                          | NA                          |
| R01_cb16338_c0/f5p1/1132    | NA                      | NA                          | NA                          | R01_cb16338_c0/f5p1/1132    |
| R01_cb101_c5/flp0/3045      | NA                      | NA                          | NA                          | R01_cb101_c5/flp0/3045      |
| R01_cb313_c14/flp0/2248     | NA                      | R01_cb313_c14/flp0/2248     | NA                          | R01_cb313_c14/flp0/2248     |
| R01_cb8564_c75318/flp0/2619 | NA                      | NA                          | NA                          | R01_cb8564_c75318/flp0/2619 |
| R01_cb289_c21/flp0/1853     | NA                      | R01_cb289_c21/flp0/1853     | NA                          | NA                          |
| R01_cb18456_c3283/flp3/986  | NA                      | R01_cb18456_c3283/flp3/986  | NA                          | NA                          |
| R01_cb14751_c1/flp0/748     | NA                      | R01_cb14751_c1/flp0/748     | NA                          | NA                          |
| R01_cb7257_c1/flp0/2322     | NA                      | NA                          | NA                          | R01_cb7257_c1/flp0/2322     |
| R01_cb15154_c6/flp0/860     | NA                      | NA                          | NA                          | R01_cb15154_c6/flp0/860     |
| R01_cb12865_c22/flp0/438    | NA                      | R01_cb12865_c22/flp0/438    | NA                          | NA                          |
| R01_cb8564_c119911/flp0/210 | NA                      | R01_cb8564_c119911/flp0/210 | R01_cb8564_c119911/flp0/210 | R01_cb8564_c119911/flp0/210 |

|                             |                          |                             |                             |                             |
|-----------------------------|--------------------------|-----------------------------|-----------------------------|-----------------------------|
| 2                           |                          | 2                           | 2                           | 2                           |
| R01_cb14293_c3/flp0/1096    | NA                       | R01_cb14293_c3/flp0/1096    | NA                          | NA                          |
| R01_cb12566_c10/flp0/348    | R01_cb12566_c10/flp0/348 | R01_cb12566_c10/flp0/348    | R01_cb12566_c10/flp0/348    | R01_cb12566_c10/flp0/348    |
| R01_cb18456_c5355/flp0/796  | NA                       | R01_cb18456_c5355/flp0/796  | NA                          | NA                          |
| R01_cb14004_c6/flp1/1238    | NA                       | NA                          | NA                          | R01_cb14004_c6/flp1/1238    |
| R01_cb13889_c16/flp0/874    | NA                       | R01_cb13889_c16/flp0/874    | NA                          | NA                          |
| R01_cb13586_c6/flp0/448     | NA                       | R01_cb13586_c6/flp0/448     | NA                          | NA                          |
| R01_cb16176_c0/flp0/1117    | NA                       | NA                          | NA                          | R01_cb16176_c0/flp0/1117    |
| R01_cb12743_c6/f5p0/974     | NA                       | NA                          | NA                          | R01_cb12743_c6/f5p0/974     |
| R01_cb3797_c9/flp0/8016     | NA                       | NA                          | NA                          | R01_cb3797_c9/flp0/8016     |
| R01_cb9222_c18/flp0/2637    | NA                       | R01_cb9222_c18/flp0/2637    | NA                          | NA                          |
| R01_cb7296_c2/f2p1/2070     | NA                       | NA                          | NA                          | R01_cb7296_c2/f2p1/2070     |
| R01_cb1240_c8/flp0/2560     | NA                       | R01_cb1240_c8/flp0/2560     | NA                          | NA                          |
| R01_cb8564_c123884/flp0/293 | NA                       | R01_cb8564_c123884/flp0/293 | R01_cb8564_c123884/flp0/293 | R01_cb8564_c123884/flp0/293 |
| 3                           |                          | 3                           | 3                           | 3                           |
| R01_cb10091_c2/flp0/3144    | NA                       | R01_cb10091_c2/flp0/3144    | NA                          | NA                          |
| R01_cb2445_c4/f2p0/3645     | NA                       | NA                          | NA                          | R01_cb2445_c4/f2p0/3645     |
| R01_cb14694_c1/flp0/1038    | NA                       | NA                          | NA                          | R01_cb14694_c1/flp0/1038    |
| R01_cb16915_c1/f2p0/660     | NA                       | R01_cb16915_c1/f2p0/660     | NA                          | NA                          |
| R01_cb5807_c3/flp0/2811     | R01_cb5807_c3/flp0/2811  | R01_cb5807_c3/flp0/2811     | NA                          | R01_cb5807_c3/flp0/2811     |
| R01_cb8564_c72227/f2p1/4420 | NA                       | NA                          | NA                          | R01_cb8564_c72227/f2p1/4420 |
| R01_cb10221_c0/f3p0/1818    | NA                       | R01_cb10221_c0/f3p0/1818    | NA                          | R01_cb10221_c0/f3p0/1818    |
| R01_cb2389_c12/flp0/2660    | NA                       | NA                          | NA                          | R01_cb2389_c12/flp0/2660    |
| R01_cb14316_c7/flp0/1684    | NA                       | R01_cb14316_c7/flp0/1684    | R01_cb14316_c7/flp0/1684    | R01_cb14316_c7/flp0/1684    |
| R01_cb11205_c0/flp0/1620    | NA                       | R01_cb11205_c0/flp0/1620    | NA                          | NA                          |
| R01_cb17583_c2/flp1/1583    | NA                       | NA                          | NA                          | R01_cb17583_c2/flp1/1583    |

|                              |                             |                              |                             |                              |
|------------------------------|-----------------------------|------------------------------|-----------------------------|------------------------------|
| R01_cb18123_c0/flp0/903      | NA                          | R01_cb18123_c0/flp0/903      | NA                          | R01_cb18123_c0/flp0/903      |
| R01_cb3919_c1/flp0/1252      | NA                          | R01_cb3919_c1/flp0/1252      | NA                          | NA                           |
| R01_cb6586_c4/flp0/1876      | NA                          | R01_cb6586_c4/flp0/1876      | NA                          | NA                           |
| R01_cb9411_c2/flp0/2414      | R01_cb9411_c2/flp0/2414     | R01_cb9411_c2/flp0/2414      | R01_cb9411_c2/flp0/2414     | R01_cb9411_c2/flp0/2414      |
| R01_cb7600_c22/flp0/340      | R01_cb7600_c22/flp0/340     | R01_cb7600_c22/flp0/340      | R01_cb7600_c22/flp0/340     | R01_cb7600_c22/flp0/340      |
| R01_cb3218_c8/flp0/2827      | NA                          | NA                           | NA                          | R01_cb3218_c8/flp0/2827      |
| R01_cb8564_c34243/f2p0/3193  | R01_cb8564_c34243/f2p0/3193 | R01_cb8564_c34243/f2p0/3193  | R01_cb8564_c34243/f2p0/3193 | R01_cb8564_c34243/f2p0/3193  |
| R01_cb8564_c21867/flp1/3561  | NA                          | R01_cb8564_c21867/flp1/3561  | NA                          | R01_cb8564_c21867/flp1/3561  |
| R01_cb17266_c10/flp0/1080    | NA                          | R01_cb17266_c10/flp0/1080    | R01_cb17266_c10/flp0/1080   | R01_cb17266_c10/flp0/1080    |
| R01_cb8564_c847/f2p0/2724    | R01_cb8564_c847/f2p0/2724   | R01_cb8564_c847/f2p0/2724    | NA                          | NA                           |
| R01_cb11003_c1/flp0/1895     | NA                          | R01_cb11003_c1/flp0/1895     | NA                          | R01_cb11003_c1/flp0/1895     |
| R01_cb7953_c6/flp0/3068      | NA                          | R01_cb7953_c6/flp0/3068      | NA                          | NA                           |
| R01_cb8564_c115781/flp0/2431 | NA                          | R01_cb8564_c115781/flp0/2431 | NA                          | R01_cb8564_c115781/flp0/2431 |
| R01_cb8564_c120503/flp0/1998 | NA                          | NA                           | NA                          | R01_cb8564_c120503/flp0/1998 |
| R01_cb4469_c4/flp0/4596      | NA                          | NA                           | NA                          | R01_cb4469_c4/flp0/4596      |
| R01_cb11612_c1/flp0/4652     | NA                          | NA                           | NA                          | R01_cb11612_c1/flp0/4652     |
| R01_cb4501_c4/flp0/3015      | NA                          | NA                           | NA                          | R01_cb4501_c4/flp0/3015      |
| R01_cb7335_c4/f2p0/3632      | NA                          | R01_cb7335_c4/f2p0/3632      | NA                          | R01_cb7335_c4/f2p0/3632      |
| R01_cb10288_c1/flp0/2983     | R01_cb10288_c1/flp0/2983    | R01_cb10288_c1/flp0/2983     | NA                          | NA                           |
| R01_cb48_c11/flp2/5127       | NA                          | NA                           | NA                          | R01_cb48_c11/flp2/5127       |
| R01_cb8564_c88253/flp0/4290  | R01_cb8564_c88253/flp0/4290 | R01_cb8564_c88253/flp0/4290  | NA                          | R01_cb8564_c88253/flp0/4290  |
| R01_cb5533_c24/flp0/2861     | R01_cb5533_c24/flp0/2861    | R01_cb5533_c24/flp0/2861     | R01_cb5533_c24/flp0/2861    | R01_cb5533_c24/flp0/2861     |

|                             |                            |                             |                            |                            |
|-----------------------------|----------------------------|-----------------------------|----------------------------|----------------------------|
| R01_cb12360_c5/flp0/516     | R01_cb12360_c5/flp0/516    | R01_cb12360_c5/flp0/516     | NA                         | NA                         |
| R01_cb18409_c92/flp0/382    | R01_cb18409_c92/flp0/382   | R01_cb18409_c92/flp0/382    | R01_cb18409_c92/flp0/382   | R01_cb18409_c92/flp0/382   |
| R01_cb69_c36/flp0/868       | NA                         | NA                          | NA                         | R01_cb69_c36/flp0/868      |
| R01_cb17562_c5/flp0/519     | NA                         | R01_cb17562_c5/flp0/519     | NA                         | NA                         |
| R01_cb18359_c2/flp0/1790    | NA                         | NA                          | NA                         | R01_cb18359_c2/flp0/1790   |
| R01_cb11697_c1/flp0/3198    | NA                         | R01_cb11697_c1/flp0/3198    | NA                         | NA                         |
| R01_cb5815_c2/flp0/3001     | NA                         | NA                          | NA                         | R01_cb5815_c2/flp0/3001    |
| R01_cb12650_c1/flp0/525     | NA                         | R01_cb12650_c1/flp0/525     | NA                         | NA                         |
| R01_cb18297_c0/f2p0/1609    | NA                         | NA                          | NA                         | R01_cb18297_c0/f2p0/1609   |
| R01_cb18002_c1/flp0/1003    | NA                         | R01_cb18002_c1/flp0/1003    | NA                         | NA                         |
| R01_cb15019_c8/flp1/916     | R01_cb15019_c8/flp1/916    | R01_cb15019_c8/flp1/916     | NA                         | NA                         |
| R01_cb9646_c3/flp0/1831     | NA                         | NA                          | NA                         | R01_cb9646_c3/flp0/1831    |
| R01_cb18482_c0/flp0/1690    | NA                         | NA                          | NA                         | R01_cb18482_c0/flp0/1690   |
| R01_cb2744_c5/flp0/820      | NA                         | NA                          | NA                         | R01_cb2744_c5/flp0/820     |
| R01_cb8564_c2465/flp0/2936  | NA                         | R01_cb8564_c2465/flp0/2936  | NA                         | R01_cb8564_c2465/flp0/2936 |
| R01_cb5156_c1/flp0/3165     | NA                         | NA                          | NA                         | R01_cb5156_c1/flp0/3165    |
| R01_cb18456_c6102/flp0/695  | NA                         | NA                          | NA                         | R01_cb18456_c6102/flp0/695 |
| R01_cb11827_c1/flp0/1893    | NA                         | NA                          | NA                         | R01_cb11827_c1/flp0/1893   |
| R01_cb8564_c84129/flp0/2206 | NA                         | R01_cb8564_c84129/flp0/2206 | NA                         | NA                         |
| R01_cb18456_c7195/flp0/695  | R01_cb18456_c7195/flp0/695 | R01_cb18456_c7195/flp0/695  | R01_cb18456_c7195/flp0/695 | R01_cb18456_c7195/flp0/695 |
| R01_cb15287_c0/flp0/561     | NA                         | NA                          | NA                         | R01_cb15287_c0/flp0/561    |
| R01_cb5412_c0/f2p0/2007     | NA                         | NA                          | NA                         | R01_cb5412_c0/f2p0/2007    |
| R01_cb11321_c0/f2p0/1358    | NA                         | NA                          | NA                         | R01_cb11321_c0/f2p0/1358   |
| R01_cb18456_c7249/flp0/450  | R01_cb18456_c7249/flp0/450 | R01_cb18456_c7249/flp0/450  | R01_cb18456_c7249/flp0/450 | R01_cb18456_c7249/flp0/450 |
| R01_cb16645_c14/flp0/1352   | NA                         | R01_cb16645_c14/flp0/1352   | NA                         | R01_cb16645_c14/flp0/1352  |
| R01_cb14239_c17/flp0/699    | R01_cb14239_c17/flp0/699   | R01_cb14239_c17/flp0/699    | NA                         | R01_cb14239_c17/flp0/699   |



|                             |                            |                             |                            |                             |
|-----------------------------|----------------------------|-----------------------------|----------------------------|-----------------------------|
| R01_cb10196_c1/flp0/3039    | NA                         | R01_cb10196_c1/flp0/3039    | NA                         | R01_cb10196_c1/flp0/3039    |
| R01_cb7171_c5/flp1/2635     | NA                         | NA                          | NA                         | R01_cb7171_c5/flp1/2635     |
| R01_cb17669_c0/f2p0/582     | NA                         | R01_cb17669_c0/f2p0/582     | NA                         | R01_cb17669_c0/f2p0/582     |
| R01_cb4269_c2/f2p0/807      | R01_cb4269_c2/f2p0/807     | R01_cb4269_c2/f2p0/807      | NA                         | R01_cb4269_c2/f2p0/807      |
| R01_cb11375_c1/flp1/3084    | NA                         | R01_cb11375_c1/flp1/3084    | NA                         | NA                          |
| R01_cb10611_c4/flp0/1378    | NA                         | NA                          | NA                         | R01_cb10611_c4/flp0/1378    |
| R01_cb293_c5/flp0/4488      | NA                         | NA                          | NA                         | R01_cb293_c5/flp0/4488      |
| R01_cb5506_c4/flp0/990      | NA                         | NA                          | NA                         | R01_cb5506_c4/flp0/990      |
| R01_cb8941_c5/flp0/1527     | NA                         | NA                          | NA                         | R01_cb8941_c5/flp0/1527     |
| R01_cb16645_c52/flp0/1476   | NA                         | R01_cb16645_c52/flp0/1476   | NA                         | NA                          |
| R01_cb18211_c0/flp0/504     | NA                         | NA                          | NA                         | R01_cb18211_c0/flp0/504     |
| R01_cb2022_c12/flp1/2286    | NA                         | NA                          | NA                         | R01_cb2022_c12/flp1/2286    |
| R01_cb17329_c1/flp0/1028    | NA                         | NA                          | NA                         | R01_cb17329_c1/flp0/1028    |
| R01_cb10397_c5/flp0/1155    | NA                         | R01_cb10397_c5/flp0/1155    | NA                         | R01_cb10397_c5/flp0/1155    |
| R01_cb15346_c1/fl2p2/660    | NA                         | NA                          | R01_cb15346_c1/fl2p2/660   | R01_cb15346_c1/fl2p2/660    |
| R01_cb16184_c1/flp0/418     | R01_cb16184_c1/flp0/418    | R01_cb16184_c1/flp0/418     | R01_cb16184_c1/flp0/418    | R01_cb16184_c1/flp0/418     |
| R01_cb11050_c5/flp0/1720    | NA                         | NA                          | NA                         | R01_cb11050_c5/flp0/1720    |
| R01_cb2027_c4/flp0/3050     | NA                         | NA                          | R01_cb2027_c4/flp0/3050    | NA                          |
| R01_cb13884_c4/f3p0/437     | R01_cb13884_c4/f3p0/437    | NA                          | R01_cb13884_c4/f3p0/437    | R01_cb13884_c4/f3p0/437     |
| R01_cb8564_c14734/flp0/3360 | NA                         | R01_cb8564_c14734/flp0/3360 | NA                         | R01_cb8564_c14734/flp0/3360 |
| R01_cb8564_c127384/flp0/318 | NA                         | R01_cb8564_c127384/flp0/318 | NA                         | NA                          |
| 5                           |                            | 5                           |                            |                             |
| R01_cb13392_c31/flp0/469    | NA                         | NA                          | R01_cb13392_c31/flp0/469   | R01_cb13392_c31/flp0/469    |
| R01_cb17297_c1/flp0/577     | NA                         | R01_cb17297_c1/flp0/577     | R01_cb17297_c1/flp0/577    | R01_cb17297_c1/flp0/577     |
| R01_cb8564_c1024/flp0/3041  | NA                         | R01_cb8564_c1024/flp0/3041  | NA                         | NA                          |
| R01_cb18456_c7196/flp0/455  | R01_cb18456_c7196/flp0/455 | R01_cb18456_c7196/flp0/455  | R01_cb18456_c7196/flp0/455 | R01_cb18456_c7196/flp0/455  |

|                             |                             |                             |                             |                             |
|-----------------------------|-----------------------------|-----------------------------|-----------------------------|-----------------------------|
| R01_cb18456_c765/flp11/807  | NA                          | R01_cb18456_c765/flp11/807  | NA                          | NA                          |
| R01_cb5246_c2/flp0/2737     | R01_cb5246_c2/flp0/2737     | R01_cb5246_c2/flp0/2737     | R01_cb5246_c2/flp0/2737     | R01_cb5246_c2/flp0/2737     |
| R01_cb12636_c2/f2p0/1527    | NA                          | NA                          | NA                          | R01_cb12636_c2/f2p0/1527    |
| R01_cb12045_c5/flp0/6393    | NA                          | R01_cb12045_c5/flp0/6393    | NA                          | R01_cb12045_c5/flp0/6393    |
| R01_cb10921_c1/flp0/2459    | NA                          | NA                          | NA                          | R01_cb10921_c1/flp0/2459    |
| R01_cb8564_c77837/flp0/4056 | R01_cb8564_c77837/flp0/4056 | R01_cb8564_c77837/flp0/4056 | NA                          | NA                          |
| R01_cb6553_c2/flp0/2826     | NA                          | R01_cb6553_c2/flp0/2826     | NA                          | R01_cb6553_c2/flp0/2826     |
| R01_cb18456_c2063/flp1/1677 | NA                          | R01_cb18456_c2063/flp1/1677 | NA                          | NA                          |
| R01_cb8564_c1993/flp0/2538  | NA                          | R01_cb8564_c1993/flp0/2538  | NA                          | NA                          |
| R01_cb7502_c2/flp0/2600     | NA                          | NA                          | NA                          | R01_cb7502_c2/flp0/2600     |
| R01_cb3922_c24/flp0/615     | NA                          | R01_cb3922_c24/flp0/615     | R01_cb3922_c24/flp0/615     | R01_cb3922_c24/flp0/615     |
| R01_cb18456_c6618/flp0/416  | R01_cb18456_c6618/flp0/416  | R01_cb18456_c6618/flp0/416  | R01_cb18456_c6618/flp0/416  | R01_cb18456_c6618/flp0/416  |
| R01_cb8564_c40533/flp0/2719 | NA                          | R01_cb8564_c40533/flp0/2719 | R01_cb8564_c40533/flp0/2719 | R01_cb8564_c40533/flp0/2719 |
| R01_cb18409_c101/flp0/1007  | R01_cb18409_c101/flp0/1007  | R01_cb18409_c101/flp0/1007  | R01_cb18409_c101/flp0/1007  | R01_cb18409_c101/flp0/1007  |
| R01_cb8088_c1/flp0/2570     | NA                          | R01_cb8088_c1/flp0/2570     | NA                          | NA                          |
| R01_cb8564_c72625/flp0/2535 | R01_cb8564_c72625/flp0/2535 | R01_cb8564_c72625/flp0/2535 | R01_cb8564_c72625/flp0/2535 | R01_cb8564_c72625/flp0/2535 |
| R01_cb13692_c3/flp0/1607    | NA                          | R01_cb13692_c3/flp0/1607    | NA                          | NA                          |
| R01_cb17761_c0/f4p0/769     | NA                          | NA                          | NA                          | R01_cb17761_c0/f4p0/769     |
| R01_cb15963_c2/flp0/518     | NA                          | R01_cb15963_c2/flp0/518     | R01_cb15963_c2/flp0/518     | NA                          |
| R01_cb18192_c2/f2p0/1180    | NA                          | R01_cb18192_c2/f2p0/1180    | R01_cb18192_c2/f2p0/1180    | R01_cb18192_c2/f2p0/1180    |
| R01_cb6602_c47/flp0/3008    | NA                          | NA                          | NA                          | R01_cb6602_c47/flp0/3008    |
| R01_cb16078_c6/flp1/620     | R01_cb16078_c6/flp1/620     | R01_cb16078_c6/flp1/620     | R01_cb16078_c6/flp1/620     | NA                          |
| R01_cb1119_c7/flp0/2404     | NA                          | R01_cb1119_c7/flp0/2404     | R01_cb1119_c7/flp0/2404     | NA                          |
| R01_cb12623_c2/flp0/1115    | NA                          | R01_cb12623_c2/flp0/1115    | R01_cb12623_c2/flp0/1115    | NA                          |

|                              |                            |                              |                              |                             |
|------------------------------|----------------------------|------------------------------|------------------------------|-----------------------------|
| R01_cb8564_c75753/f1p0/3425  | NA                         | R01_cb8564_c75753/f1p0/3425  | NA                           | R01_cb8564_c75753/f1p0/3425 |
| R01_cb2378_c12/f1p0/2671     | NA                         | NA                           | NA                           | R01_cb2378_c12/f1p0/2671    |
| R01_cb11025_c1/f1p0/3772     | NA                         | NA                           | NA                           | R01_cb11025_c1/f1p0/3772    |
| R01_cb9272_c3/f1p0/4598      | NA                         | NA                           | NA                           | R01_cb9272_c3/f1p0/4598     |
| R01_cb5499_c0/f2p0/2164      | NA                         | R01_cb5499_c0/f2p0/2164      | R01_cb5499_c0/f2p0/2164      | R01_cb5499_c0/f2p0/2164     |
| R01_cb16356_c0/f1p0/1260     | NA                         | R01_cb16356_c0/f1p0/1260     | NA                           | R01_cb16356_c0/f1p0/1260    |
| R01_cb8564_c9887/f2p0/2563   | R01_cb8564_c9887/f2p0/2563 | R01_cb8564_c9887/f2p0/2563   | NA                           | R01_cb8564_c9887/f2p0/2563  |
| R01_cb2632_c4/f1p0/3384      | NA                         | R01_cb2632_c4/f1p0/3384      | NA                           | NA                          |
| R01_cb8564_c32509/f1p1/2880  | NA                         | R01_cb8564_c32509/f1p1/2880  | NA                           | NA                          |
| R01_cb8564_c90311/f1p0/3083  | NA                         | R01_cb8564_c90311/f1p0/3083  | R01_cb8564_c90311/f1p0/3083  | NA                          |
| R01_cb8564_c1449/f1p0/2343   | NA                         | NA                           | NA                           | R01_cb8564_c1449/f1p0/2343  |
| R01_cb10029_c2822/f9p0/631   | NA                         | R01_cb10029_c2822/f9p0/631   | NA                           | NA                          |
| R01_cb1849_c25/f18p1/1918    | NA                         | NA                           | NA                           | R01_cb1849_c25/f18p1/1918   |
| R01_cb6615_c5/f1p0/3050      | NA                         | NA                           | R01_cb6615_c5/f1p0/3050      | R01_cb6615_c5/f1p0/3050     |
| R01_cb10948_c10/f4p0/1324    | NA                         | NA                           | NA                           | R01_cb10948_c10/f4p0/1324   |
| R01_cb8564_c69742/f1p0/4372  | NA                         | NA                           | NA                           | R01_cb8564_c69742/f1p0/4372 |
| R01_cb8564_c70174/f1p0/1958  | NA                         | R01_cb8564_c70174/f1p0/1958  | NA                           | NA                          |
| R01_cb11429_c5/f1p0/1866     | NA                         | NA                           | NA                           | R01_cb11429_c5/f1p0/1866    |
| R01_cb18725_c0/f1p0/5915     | NA                         | NA                           | NA                           | R01_cb18725_c0/f1p0/5915    |
| R01_cb8564_c120462/f1p0/2066 | NA                         | R01_cb8564_c120462/f1p0/2066 | NA                           | NA                          |
| R01_cb4076_c4/f1p0/2859      | R01_cb4076_c4/f1p0/2859    | R01_cb4076_c4/f1p0/2859      | R01_cb4076_c4/f1p0/2859      | R01_cb4076_c4/f1p0/2859     |
| R01_cb8564_c112100/f1p0/3100 | NA                         | R01_cb8564_c112100/f1p0/3100 | R01_cb8564_c112100/f1p0/3100 | NA                          |
| R01_cb8564_c72494/f1p0/3734  | NA                         | NA                           | NA                           | R01_cb8564_c72494/f1p0/3734 |
| R01_cb8564_c146513/f2p1/328  | NA                         | NA                           | NA                           | R01_cb8564_c146513/f2p1/328 |

|                             |                             |                             |                            |                             |
|-----------------------------|-----------------------------|-----------------------------|----------------------------|-----------------------------|
| 1                           |                             |                             |                            | 1                           |
| R01_cb3303_c1/flp0/3667     | NA                          | R01_cb3303_c1/flp0/3667     | R01_cb3303_c1/flp0/3667    | R01_cb3303_c1/flp0/3667     |
| R01_cb18456_c5727/flp0/849  | NA                          | R01_cb18456_c5727/flp0/849  | NA                         | NA                          |
| R01_cb18709_c0/flp1/5732    | NA                          | R01_cb18709_c0/flp1/5732    | NA                         | NA                          |
| R01_cb8564_c70179/flp0/2630 | NA                          | NA                          | NA                         | R01_cb8564_c70179/flp0/2630 |
| R01_cb10071_c4/flp0/541     | NA                          | R01_cb10071_c4/flp0/541     | NA                         | NA                          |
| R01_cb7757_c12/flp1/1610    | NA                          | NA                          | R01_cb7757_c12/flp1/1610   | R01_cb7757_c12/flp1/1610    |
| R01_cb8564_c2598/flp0/4915  | NA                          | NA                          | NA                         | R01_cb8564_c2598/flp0/4915  |
| R01_cb14787_c8/flp0/1267    | NA                          | R01_cb14787_c8/flp0/1267    | NA                         | NA                          |
| R01_cb16462_c1/flp0/1127    | NA                          | NA                          | NA                         | R01_cb16462_c1/flp0/1127    |
| R01_cb1049_c7/flp0/4504     | NA                          | R01_cb1049_c7/flp0/4504     | NA                         | R01_cb1049_c7/flp0/4504     |
| R01_cb9592_c2/flp0/2038     | NA                          | NA                          | NA                         | R01_cb9592_c2/flp0/2038     |
| R01_cb8564_c77598/flp1/2007 | R01_cb8564_c77598/flp1/2007 | R01_cb8564_c77598/flp1/2007 | NA                         | NA                          |
| R01_cb14524_c2/flp0/1611    | NA                          | NA                          | NA                         | R01_cb14524_c2/flp0/1611    |
| R01_cb18456_c1863/flp0/878  | NA                          | R01_cb18456_c1863/flp0/878  | NA                         | NA                          |
| R01_cb14660_c2/f2p0/728     | NA                          | R01_cb14660_c2/f2p0/728     | NA                         | R01_cb14660_c2/f2p0/728     |
| R01_cb10031_c6/flp0/757     | NA                          | R01_cb10031_c6/flp0/757     | NA                         | NA                          |
| R01_cb8564_c4911/flp0/2481  | R01_cb8564_c4911/flp0/2481  | R01_cb8564_c4911/flp0/2481  | R01_cb8564_c4911/flp0/2481 | R01_cb8564_c4911/flp0/2481  |
| R01_cb1905_c26/flp0/2195    | R01_cb1905_c26/flp0/2195    | R01_cb1905_c26/flp0/2195    | R01_cb1905_c26/flp0/2195   | R01_cb1905_c26/flp0/2195    |
| R01_cb8564_c17893/f3p0/4091 | NA                          | R01_cb8564_c17893/f3p0/4091 | NA                         | NA                          |
| R01_cb11135_c4/flp0/1315    | NA                          | R01_cb11135_c4/flp0/1315    | R01_cb11135_c4/flp0/1315   | R01_cb11135_c4/flp0/1315    |
| R01_cb16098_c1/flp0/618     | R01_cb16098_c1/flp0/618     | R01_cb16098_c1/flp0/618     | R01_cb16098_c1/flp0/618    | R01_cb16098_c1/flp0/618     |
| R01_cb6845_c40/f2p0/2333    | NA                          | NA                          | NA                         | R01_cb6845_c40/f2p0/2333    |
| R01_cb15081_c6/f8p1/954     | NA                          | R01_cb15081_c6/f8p1/954     | NA                         | NA                          |
| R01_cb3269_c11/flp0/2163    | NA                          | R01_cb3269_c11/flp0/2163    | NA                         | NA                          |

|                             |                          |                             |                             |                             |
|-----------------------------|--------------------------|-----------------------------|-----------------------------|-----------------------------|
| R01_cb8564_c45235/f1p1/2650 | NA                       | NA                          | NA                          | R01_cb8564_c45235/f1p1/2650 |
| R01_cb812_c8/f1p1/3695      | NA                       | R01_cb812_c8/f1p1/3695      | NA                          | NA                          |
| R01_cb2960_c2/f1p0/2155     | NA                       | NA                          | NA                          | R01_cb2960_c2/f1p0/2155     |
| R01_cb6547_c9/f1p1/1933     | NA                       | NA                          | NA                          | R01_cb6547_c9/f1p1/1933     |
| R01_cb18456_c4956/f1p3/1222 | NA                       | R01_cb18456_c4956/f1p3/1222 | NA                          | NA                          |
| R01_cb7228_c0/f9p1/2624     | NA                       | NA                          | NA                          | R01_cb7228_c0/f9p1/2624     |
| R01_cb10303_c1/f1p0/2876    | NA                       | R01_cb10303_c1/f1p0/2876    | R01_cb10303_c1/f1p0/2876    | NA                          |
| R01_cb8564_c75788/f1p0/2238 | NA                       | NA                          | R01_cb8564_c75788/f1p0/2238 | R01_cb8564_c75788/f1p0/2238 |
| R01_cb2959_c5/f1p0/3349     | NA                       | NA                          | NA                          | R01_cb2959_c5/f1p0/3349     |
| R01_cb13433_c128/f1p0/5565  | NA                       | NA                          | NA                          | R01_cb13433_c128/f1p0/5565  |
| R01_cb9617_c18/f2p3/1848    | NA                       | NA                          | NA                          | R01_cb9617_c18/f2p3/1848    |
| R01_cb8564_c22798/f1p0/2414 | NA                       | NA                          | R01_cb8564_c22798/f1p0/2414 | NA                          |
| R01_cb17894_c0/f2p0/871     | R01_cb17894_c0/f2p0/871  | R01_cb17894_c0/f2p0/871     | R01_cb17894_c0/f2p0/871     | R01_cb17894_c0/f2p0/871     |
| R01_cb18456_c7617/f1p0/1413 | NA                       | R01_cb18456_c7617/f1p0/1413 | NA                          | R01_cb18456_c7617/f1p0/1413 |
| R01_cb2674_c16/f1p0/3023    | NA                       | R01_cb2674_c16/f1p0/3023    | NA                          | R01_cb2674_c16/f1p0/3023    |
| R01_cb16645_c30/f1p0/380    | R01_cb16645_c30/f1p0/380 | R01_cb16645_c30/f1p0/380    | R01_cb16645_c30/f1p0/380    | R01_cb16645_c30/f1p0/380    |
| R01_cb8905_c8/f1p1/1392     | NA                       | NA                          | NA                          | R01_cb8905_c8/f1p1/1392     |
| R01_cb8564_c72710/f1p2/3413 | NA                       | NA                          | NA                          | R01_cb8564_c72710/f1p2/3413 |
| R01_cb2200_c2/f1p0/4021     | NA                       | NA                          | R01_cb2200_c2/f1p0/4021     | R01_cb2200_c2/f1p0/4021     |
| R01_cb1788_c7/f1p0/2957     | NA                       | R01_cb1788_c7/f1p0/2957     | NA                          | R01_cb1788_c7/f1p0/2957     |
| R01_cb502_c19/f1p0/2650     | NA                       | R01_cb502_c19/f1p0/2650     | NA                          | NA                          |
| R01_cb5339_c3/f1p0/2386     | NA                       | NA                          | NA                          | R01_cb5339_c3/f1p0/2386     |
| R01_cb18750_c0/f1p0/5164    | NA                       | NA                          | NA                          | R01_cb18750_c0/f1p0/5164    |
| R01_cb8564_c115317/f1p0/259 | NA                       | R01_cb8564_c115317/f1p0/259 | NA                          | NA                          |
| 7                           |                          | 7                           |                             |                             |
| R01_cb6278_c12/f1p0/2879    | NA                       | NA                          | NA                          | R01_cb6278_c12/f1p0/2879    |

|                              |                             |                              |                             |                             |
|------------------------------|-----------------------------|------------------------------|-----------------------------|-----------------------------|
| R01_cb11774_c1/flp0/2870     | R01_cb11774_c1/flp0/2870    | R01_cb11774_c1/flp0/2870     | NA                          | NA                          |
| R01_cb15114_c0/f4p0/975      | NA                          | NA                           | NA                          | R01_cb15114_c0/f4p0/975     |
| R01_cb8564_c53156/flp0/2866  | NA                          | NA                           | NA                          | R01_cb8564_c53156/flp0/2866 |
| R01_cb11488_c1/flp0/1908     | NA                          | R01_cb11488_c1/flp0/1908     | R01_cb11488_c1/flp0/1908    | R01_cb11488_c1/flp0/1908    |
| R01_cb8564_c108411/flp1/3146 | NA                          | R01_cb8564_c108411/flp1/3146 | NA                          | NA                          |
| R01_cb12045_c4/flp1/1348     | NA                          | NA                           | NA                          | R01_cb12045_c4/flp1/1348    |
| R01_cb5950_c19/flp0/2780     | NA                          | R01_cb5950_c19/flp0/2780     | NA                          | NA                          |
| R01_cb17786_c1/flp0/468      | R01_cb17786_c1/flp0/468     | R01_cb17786_c1/flp0/468      | R01_cb17786_c1/flp0/468     | R01_cb17786_c1/flp0/468     |
| R01_cb3774_c43/flp1/2434     | NA                          | R01_cb3774_c43/flp1/2434     | NA                          | NA                          |
| R01_cb8564_c43335/flp0/2669  | R01_cb8564_c43335/flp0/2669 | R01_cb8564_c43335/flp0/2669  | R01_cb8564_c43335/flp0/2669 | R01_cb8564_c43335/flp0/2669 |
| R01_cb15702_c0/flp0/451      | R01_cb15702_c0/flp0/451     | R01_cb15702_c0/flp0/451      | R01_cb15702_c0/flp0/451     | R01_cb15702_c0/flp0/451     |
| R01_cb16822_c1/flp0/923      | NA                          | R01_cb16822_c1/flp0/923      | NA                          | NA                          |
| R01_cb16541_c1/flp0/1504     | NA                          | NA                           | NA                          | R01_cb16541_c1/flp0/1504    |
| R01_cb4370_c7/flp0/2660      | NA                          | NA                           | NA                          | R01_cb4370_c7/flp0/2660     |
| R01_cb17659_c0/flp1/1568     | NA                          | NA                           | NA                          | R01_cb17659_c0/flp1/1568    |
| R01_cb4708_c1/f2p0/1581      | NA                          | R01_cb4708_c1/f2p0/1581      | NA                          | NA                          |
| R01_cb14004_c21/fl5p1/1437   | NA                          | NA                           | NA                          | R01_cb14004_c21/fl5p1/1437  |
| R01_cb4657_c10/flp0/4691     | NA                          | R01_cb4657_c10/flp0/4691     | NA                          | NA                          |
| R01_cb1892_c2/flp0/4133      | NA                          | R01_cb1892_c2/flp0/4133      | NA                          | R01_cb1892_c2/flp0/4133     |
| R01_cb8564_c91081/flp0/2806  | R01_cb8564_c91081/flp0/2806 | R01_cb8564_c91081/flp0/2806  | NA                          | NA                          |
| R01_cb10198_c1/f4p1/606      | NA                          | R01_cb10198_c1/f4p1/606      | NA                          | NA                          |
| R01_cb15591_c9/flp0/521      | NA                          | R01_cb15591_c9/flp0/521      | R01_cb15591_c9/flp0/521     | NA                          |
| R01_cb9234_c2/flp0/1510      | NA                          | R01_cb9234_c2/flp0/1510      | NA                          | R01_cb9234_c2/flp0/1510     |

|                             |                             |                             |                             |                             |
|-----------------------------|-----------------------------|-----------------------------|-----------------------------|-----------------------------|
| R01_cb4576_c34/flp0/2188    | NA                          | R01_cb4576_c34/flp0/2188    | NA                          | NA                          |
| R01_cb7484_c4/flp0/2339     | NA                          | R01_cb7484_c4/flp0/2339     | NA                          | R01_cb7484_c4/flp0/2339     |
| R01_cb13733_c3/flp0/1227    | NA                          | R01_cb13733_c3/flp0/1227    | NA                          | NA                          |
| R01_cb8564_c38656/flp0/3990 | R01_cb8564_c38656/flp0/3990 | R01_cb8564_c38656/flp0/3990 | R01_cb8564_c38656/flp0/3990 | NA                          |
| R01_cb8564_c75099/flp1/2485 | NA                          | NA                          | NA                          | R01_cb8564_c75099/flp1/2485 |
| R01_cb14566_c2/flp0/1746    | NA                          | R01_cb14566_c2/flp0/1746    | R01_cb14566_c2/flp0/1746    | R01_cb14566_c2/flp0/1746    |
| R01_cb8564_c3059/flp0/2839  | NA                          | R01_cb8564_c3059/flp0/2839  | NA                          | R01_cb8564_c3059/flp0/2839  |
| R01_cb12223_c3/flp0/435     | R01_cb12223_c3/flp0/435     | R01_cb12223_c3/flp0/435     | R01_cb12223_c3/flp0/435     | R01_cb12223_c3/flp0/435     |
| R01_cb7032_c4/flp0/2058     | NA                          | NA                          | NA                          | R01_cb7032_c4/flp0/2058     |
| R01_cb11307_c3/flp0/819     | R01_cb11307_c3/flp0/819     | R01_cb11307_c3/flp0/819     | R01_cb11307_c3/flp0/819     | R01_cb11307_c3/flp0/819     |
| R01_cb13780_c4/flp0/1353    | NA                          | R01_cb13780_c4/flp0/1353    | NA                          | R01_cb13780_c4/flp0/1353    |
| R01_cb16888_c7/flp0/1000    | NA                          | NA                          | R01_cb16888_c7/flp0/1000    | R01_cb16888_c7/flp0/1000    |
| R01_cb15352_c7/f6p2/757     | NA                          | R01_cb15352_c7/f6p2/757     | NA                          | R01_cb15352_c7/f6p2/757     |
| R01_cb16365_c3/flp0/1755    | NA                          | R01_cb16365_c3/flp0/1755    | NA                          | R01_cb16365_c3/flp0/1755    |
| R01_cb12037_c10/flp0/643    | R01_cb12037_c10/flp0/643    | NA                          | R01_cb12037_c10/flp0/643    | NA                          |
| R01_cb18131_c1/flp0/1572    | NA                          | NA                          | NA                          | R01_cb18131_c1/flp0/1572    |
| R01_cb15318_c2/f2p1/570     | R01_cb15318_c2/f2p1/570     | NA                          | NA                          | NA                          |
| R01_cb6326_c72/flp0/532     | R01_cb6326_c72/flp0/532     | R01_cb6326_c72/flp0/532     | NA                          | R01_cb6326_c72/flp0/532     |
| R01_cb6480_c0/f2p1/2702     | NA                          | NA                          | NA                          | R01_cb6480_c0/f2p1/2702     |
| R01_cb6570_c3/flp0/2579     | NA                          | R01_cb6570_c3/flp0/2579     | NA                          | R01_cb6570_c3/flp0/2579     |
| R01_cb15207_c51/flp2/833    | NA                          | R01_cb15207_c51/flp2/833    | R01_cb15207_c51/flp2/833    | NA                          |
| R01_cb8564_c46054/flp0/2739 | R01_cb8564_c46054/flp0/2739 | R01_cb8564_c46054/flp0/2739 | NA                          | R01_cb8564_c46054/flp0/2739 |
| R01_cb10272_c19/flp0/1707   | NA                          | R01_cb10272_c19/flp0/1707   | R01_cb10272_c19/flp0/1707   | R01_cb10272_c19/flp0/1707   |
| R01_cb13184_c3/flp0/438     | R01_cb13184_c3/flp0/438     | R01_cb13184_c3/flp0/438     | R01_cb13184_c3/flp0/438     | R01_cb13184_c3/flp0/438     |

|                              |                             |                             |                              |                              |
|------------------------------|-----------------------------|-----------------------------|------------------------------|------------------------------|
| R01_cb8564_c82043/flp0/2070  | R01_cb8564_c82043/flp0/2070 | R01_cb8564_c82043/flp0/2070 | R01_cb8564_c82043/flp0/2070  | R01_cb8564_c82043/flp0/2070  |
| R01_cb8564_c4493/flp1/3835   | NA                          | R01_cb8564_c4493/flp1/3835  | R01_cb8564_c4493/flp1/3835   | R01_cb8564_c4493/flp1/3835   |
| R01_cb882_c8/flp0/1341       | NA                          | R01_cb882_c8/flp0/1341      | NA                           | R01_cb882_c8/flp0/1341       |
| R01_cb8564_c1735/flp0/2133   | NA                          | R01_cb8564_c1735/flp0/2133  | NA                           | R01_cb8564_c1735/flp0/2133   |
| R01_cb16704_c4/flp0/1790     | NA                          | R01_cb16704_c4/flp0/1790    | NA                           | R01_cb16704_c4/flp0/1790     |
| R01_cb10888_c2/flp0/2349     | NA                          | NA                          | NA                           | R01_cb10888_c2/flp0/2349     |
| R01_cb8122_c4/flp0/2280      | NA                          | NA                          | NA                           | R01_cb8122_c4/flp0/2280      |
| R01_cb5676_c9/flp0/2906      | NA                          | NA                          | NA                           | R01_cb5676_c9/flp0/2906      |
| R01_cb18456_c3620/flp0/387   | R01_cb18456_c3620/flp0/387  | R01_cb18456_c3620/flp0/387  | R01_cb18456_c3620/flp0/387   | R01_cb18456_c3620/flp0/387   |
| R01_cb11353_c1/flp0/892      | NA                          | NA                          | NA                           | R01_cb11353_c1/flp0/892      |
| R01_cb8549_c0/flp0/2338      | NA                          | NA                          | NA                           | R01_cb8549_c0/flp0/2338      |
| R01_cb8564_c109430/f3p0/2244 | NA                          | NA                          | R01_cb8564_c109430/f3p0/2244 | R01_cb8564_c109430/f3p0/2244 |
| R01_cb18409_c98/flp0/726     | R01_cb18409_c98/flp0/726    | R01_cb18409_c98/flp0/726    | R01_cb18409_c98/flp0/726     | R01_cb18409_c98/flp0/726     |
| R01_cb13026_c6/flp0/795      | NA                          | R01_cb13026_c6/flp0/795     | NA                           | R01_cb13026_c6/flp0/795      |
| R01_cb507_c5/flp0/1714       | NA                          | NA                          | NA                           | R01_cb507_c5/flp0/1714       |
| R01_cb12869_c13/flp0/1587    | NA                          | NA                          | NA                           | R01_cb12869_c13/flp0/1587    |
| R01_cb11645_c0/flp0/639      | NA                          | R01_cb11645_c0/flp0/639     | NA                           | R01_cb11645_c0/flp0/639      |
| R01_cb8354_c7/flp0/2141      | NA                          | NA                          | NA                           | R01_cb8354_c7/flp0/2141      |
| R01_cb18456_c7251/flp0/734   | NA                          | NA                          | NA                           | R01_cb18456_c7251/flp0/734   |
| R01_cb8564_c90539/flp0/3298  | NA                          | NA                          | NA                           | R01_cb8564_c90539/flp0/3298  |
| R01_cb3602_c4/f2p1/618       | R01_cb3602_c4/f2p1/618      | R01_cb3602_c4/f2p1/618      | NA                           | NA                           |
| R01_cb11072_c2/f2p1/509      | NA                          | R01_cb11072_c2/f2p1/509     | NA                           | NA                           |
| R01_cb13527_c2/f4p1/766      | NA                          | NA                          | NA                           | R01_cb13527_c2/f4p1/766      |
| R01_cb8564_c118507/flp0/242  | NA                          | R01_cb8564_c118507/flp0/242 | NA                           | NA                           |



|                             |                          |                             |                             |                             |
|-----------------------------|--------------------------|-----------------------------|-----------------------------|-----------------------------|
| 0                           |                          | 0                           |                             |                             |
| R01_cb16248_c3/flp0/677     | NA                       | R01_cb16248_c3/flp0/677     | NA                          | NA                          |
| R01_cb6032_c41/flp0/2686    | NA                       | R01_cb6032_c41/flp0/2686    | NA                          | R01_cb6032_c41/flp0/2686    |
| R01_cb16261_c0/flp0/556     | NA                       | R01_cb16261_c0/flp0/556     | NA                          | R01_cb16261_c0/flp0/556     |
| R01_cb11924_c9/f4p0/607     | R01_cb11924_c9/f4p0/607  | R01_cb11924_c9/f4p0/607     | R01_cb11924_c9/f4p0/607     | NA                          |
| R01_cb1733_c0/flp0/4190     | NA                       | R01_cb1733_c0/flp0/4190     | NA                          | NA                          |
| R01_cb8564_c3143/flp0/2688  | NA                       | NA                          | NA                          | R01_cb8564_c3143/flp0/2688  |
| R01_cb5041_c1/flp0/3242     | NA                       | R01_cb5041_c1/flp0/3242     | NA                          | NA                          |
| R01_cb16866_c7/flp0/8222    | NA                       | R01_cb16866_c7/flp0/8222    | R01_cb16866_c7/flp0/8222    | NA                          |
| R01_cb12215_c2/flp0/1138    | NA                       | NA                          | NA                          | R01_cb12215_c2/flp0/1138    |
| R01_cb11060_c2/flp0/2069    | NA                       | R01_cb11060_c2/flp0/2069    | NA                          | NA                          |
| R01_cb6719_c19/flp0/2110    | R01_cb6719_c19/flp0/2110 | R01_cb6719_c19/flp0/2110    | R01_cb6719_c19/flp0/2110    | R01_cb6719_c19/flp0/2110    |
| R01_cb15006_c2/flp0/1191    | NA                       | R01_cb15006_c2/flp0/1191    | NA                          | NA                          |
| R01_cb2710_c8/flp0/3470     | NA                       | R01_cb2710_c8/flp0/3470     | NA                          | R01_cb2710_c8/flp0/3470     |
| R01_cb3791_c2/flp0/3527     | NA                       | NA                          | NA                          | R01_cb3791_c2/flp0/3527     |
| R01_cb2160_c15/flp0/3121    | NA                       | NA                          | NA                          | R01_cb2160_c15/flp0/3121    |
| R01_cb11377_c2/flp0/2982    | NA                       | R01_cb11377_c2/flp0/2982    | NA                          | NA                          |
| R01_cb8564_c112282/flp0/264 | NA                       | R01_cb8564_c112282/flp0/264 | R01_cb8564_c112282/flp0/264 | R01_cb8564_c112282/flp0/264 |
| 0                           |                          | 0                           | 0                           | 0                           |
| R01_cb8564_c81124/flp1/2509 | NA                       | R01_cb8564_c81124/flp1/2509 | NA                          | NA                          |
| R01_cb454_c39/flp0/2534     | NA                       | NA                          | NA                          | R01_cb454_c39/flp0/2534     |
| R01_cb13910_c13/flp0/1490   | NA                       | R01_cb13910_c13/flp0/1490   | R01_cb13910_c13/flp0/1490   | R01_cb13910_c13/flp0/1490   |
| R01_cb5042_c1/flp0/3196     | NA                       | NA                          | R01_cb5042_c1/flp0/3196     | R01_cb5042_c1/flp0/3196     |
| R01_cb17648_c0/flp0/1665    | NA                       | R01_cb17648_c0/flp0/1665    | NA                          | NA                          |
| R01_cb16037_c7/flp0/777     | NA                       | R01_cb16037_c7/flp0/777     | NA                          | NA                          |
| R01_cb5783_c0/flp0/3011     | NA                       | R01_cb5783_c0/flp0/3011     | NA                          | R01_cb5783_c0/flp0/3011     |

|                              |                             |                              |                             |                              |
|------------------------------|-----------------------------|------------------------------|-----------------------------|------------------------------|
| R01_cb6553_c1/f2p0/1270      | NA                          | NA                           | NA                          | R01_cb6553_c1/f2p0/1270      |
| R01_cb2779_c4/f1p0/1936      | NA                          | NA                           | NA                          | R01_cb2779_c4/f1p0/1936      |
| R01_cb18409_c79/f1p0/1069    | R01_cb18409_c79/f1p0/1069   | R01_cb18409_c79/f1p0/1069    | R01_cb18409_c79/f1p0/1069   | R01_cb18409_c79/f1p0/1069    |
| R01_cb8564_c82425/f1p0/2589  | R01_cb8564_c82425/f1p0/2589 | R01_cb8564_c82425/f1p0/2589  | NA                          | NA                           |
| R01_cb8630_c1/f1p0/2821      | NA                          | R01_cb8630_c1/f1p0/2821      | NA                          | NA                           |
| R01_cb12916_c4/f2p4/756      | NA                          | NA                           | R01_cb12916_c4/f2p4/756     | R01_cb12916_c4/f2p4/756      |
| R01_cb17898_c0/f2p0/972      | R01_cb17898_c0/f2p0/972     | R01_cb17898_c0/f2p0/972      | NA                          | R01_cb17898_c0/f2p0/972      |
| R01_cb7394_c0/f3p0/2628      | NA                          | R01_cb7394_c0/f3p0/2628      | NA                          | NA                           |
| R01_cb1568_c1/f5p2/2091      | NA                          | NA                           | NA                          | R01_cb1568_c1/f5p2/2091      |
| R01_cb17266_c21/f1p0/1508    | NA                          | R01_cb17266_c21/f1p0/1508    | R01_cb17266_c21/f1p0/1508   | R01_cb17266_c21/f1p0/1508    |
| R01_cb15824_c0/f3p0/1143     | NA                          | NA                           | NA                          | R01_cb15824_c0/f3p0/1143     |
| R01_cb17729_c1/f1p0/1499     | NA                          | R01_cb17729_c1/f1p0/1499     | NA                          | NA                           |
| R01_cb3716_c17/f1p0/1871     | NA                          | NA                           | NA                          | R01_cb3716_c17/f1p0/1871     |
| R01_cb7133_c3/f1p0/2463      | R01_cb7133_c3/f1p0/2463     | R01_cb7133_c3/f1p0/2463      | NA                          | NA                           |
| R01_cb191_c1/f1p2/4439       | NA                          | NA                           | NA                          | R01_cb191_c1/f1p2/4439       |
| R01_cb8564_c120568/f1p0/2827 | NA                          | R01_cb8564_c120568/f1p0/2827 | NA                          | R01_cb8564_c120568/f1p0/2827 |
| R01_cb9720_c0/f2p0/1729      | NA                          | NA                           | NA                          | R01_cb9720_c0/f2p0/1729      |
| R01_cb18456_c7564/f1p0/402   | R01_cb18456_c7564/f1p0/402  | R01_cb18456_c7564/f1p0/402   | R01_cb18456_c7564/f1p0/402  | R01_cb18456_c7564/f1p0/402   |
| R01_cb12336_c16/f1p0/1480    | R01_cb12336_c16/f1p0/1480   | R01_cb12336_c16/f1p0/1480    | NA                          | R01_cb12336_c16/f1p0/1480    |
| R01_cb13161_c16/f1p0/1616    | NA                          | NA                           | NA                          | R01_cb13161_c16/f1p0/1616    |
| R01_cb2970_c4/f1p0/2104      | NA                          | NA                           | NA                          | R01_cb2970_c4/f1p0/2104      |
| R01_cb6615_c26/f1p0/739      | NA                          | NA                           | R01_cb6615_c26/f1p0/739     | R01_cb6615_c26/f1p0/739      |
| R01_cb365_c8/f1p0/3146       | NA                          | NA                           | NA                          | R01_cb365_c8/f1p0/3146       |
| R01_cb8564_c83677/f1p0/2971  | NA                          | R01_cb8564_c83677/f1p0/2971  | R01_cb8564_c83677/f1p0/2971 | R01_cb8564_c83677/f1p0/2971  |

|                             |                            |                             |                            |                             |
|-----------------------------|----------------------------|-----------------------------|----------------------------|-----------------------------|
| R01_cb13144_c3/f3p0/554     | R01_cb13144_c3/f3p0/554    | R01_cb13144_c3/f3p0/554     | NA                         | R01_cb13144_c3/f3p0/554     |
| R01_cb4657_c6/flp0/2955     | NA                         | NA                          | NA                         | R01_cb4657_c6/flp0/2955     |
| R01_cb1686_c11/flp0/1327    | R01_cb1686_c11/flp0/1327   | NA                          | R01_cb1686_c11/flp0/1327   | R01_cb1686_c11/flp0/1327    |
| R01_cb10693_c4/flp1/1797    | NA                         | NA                          | NA                         | R01_cb10693_c4/flp1/1797    |
| R01_cb3307_c19/flp0/2611    | NA                         | R01_cb3307_c19/flp0/2611    | NA                         | NA                          |
| R01_cb14639_c2/f2p0/514     | NA                         | R01_cb14639_c2/f2p0/514     | NA                         | NA                          |
| R01_cb6715_c0/flp0/2796     | NA                         | NA                          | NA                         | R01_cb6715_c0/flp0/2796     |
| R01_cb5486_c3/flp1/2478     | R01_cb5486_c3/flp1/2478    | R01_cb5486_c3/flp1/2478     | R01_cb5486_c3/flp1/2478    | R01_cb5486_c3/flp1/2478     |
| R01_cb18456_c7387/flp0/972  | R01_cb18456_c7387/flp0/972 | R01_cb18456_c7387/flp0/972  | R01_cb18456_c7387/flp0/972 | R01_cb18456_c7387/flp0/972  |
| R01_cb6012_c18/flp1/1271    | NA                         | NA                          | NA                         | R01_cb6012_c18/flp1/1271    |
| R01_cb1301_c6/flp0/3235     | NA                         | NA                          | NA                         | R01_cb1301_c6/flp0/3235     |
| R01_cb8564_c72992/flp0/3120 | NA                         | R01_cb8564_c72992/flp0/3120 | NA                         | NA                          |
| R01_cb18657_c1/flp0/762     | NA                         | R01_cb18657_c1/flp0/762     | R01_cb18657_c1/flp0/762    | R01_cb18657_c1/flp0/762     |
| R01_cb15035_c4/flp0/951     | NA                         | R01_cb15035_c4/flp0/951     | NA                         | NA                          |
| R01_cb5554_c9/flp0/1602     | NA                         | R01_cb5554_c9/flp0/1602     | R01_cb5554_c9/flp0/1602    | R01_cb5554_c9/flp0/1602     |
| R01_cb8564_c40405/flp0/2909 | NA                         | R01_cb8564_c40405/flp0/2909 | NA                         | R01_cb8564_c40405/flp0/2909 |
| R01_cb6393_c4/flp1/2649     | NA                         | NA                          | NA                         | R01_cb6393_c4/flp1/2649     |
| R01_cb7502_c10/flp0/2512    | NA                         | NA                          | R01_cb7502_c10/flp0/2512   | R01_cb7502_c10/flp0/2512    |
| R01_cb17973_c57/flp0/1315   | NA                         | R01_cb17973_c57/flp0/1315   | R01_cb17973_c57/flp0/1315  | R01_cb17973_c57/flp0/1315   |
| R01_cb12057_c44/flp0/487    | R01_cb12057_c44/flp0/487   | R01_cb12057_c44/flp0/487    | R01_cb12057_c44/flp0/487   | R01_cb12057_c44/flp0/487    |
| R01_cb7096_c11/flp0/2716    | NA                         | R01_cb7096_c11/flp0/2716    | NA                         | NA                          |
| R01_cb1515_c0/flp0/4284     | NA                         | R01_cb1515_c0/flp0/4284     | R01_cb1515_c0/flp0/4284    | NA                          |
| R01_cb15998_c0/f2p0/1642    | NA                         | NA                          | NA                         | R01_cb15998_c0/f2p0/1642    |
| R01_cb4580_c4/flp0/3132     | NA                         | NA                          | NA                         | R01_cb4580_c4/flp0/3132     |
| R01_cb15951_c5/flp0/590     | NA                         | R01_cb15951_c5/flp0/590     | R01_cb15951_c5/flp0/590    | R01_cb15951_c5/flp0/590     |
| R01_cb8564_c83110/flp1/2442 | NA                         | R01_cb8564_c83110/flp1/2442 | NA                         | NA                          |

|                             |                             |                             |                             |                             |
|-----------------------------|-----------------------------|-----------------------------|-----------------------------|-----------------------------|
| R01_cb11352_c2/flp0/2732    | NA                          | R01_cb11352_c2/flp0/2732    | NA                          | R01_cb11352_c2/flp0/2732    |
| R01_cb17177_c1/f2p0/698     | NA                          | R01_cb17177_c1/f2p0/698     | NA                          | R01_cb17177_c1/f2p0/698     |
| R01_cb18456_c7556/flp0/1139 | NA                          | R01_cb18456_c7556/flp0/1139 | NA                          | NA                          |
| R01_cb2133_c49/flp0/2352    | NA                          | R01_cb2133_c49/flp0/2352    | NA                          | NA                          |
| R01_cb2834_c16/flp0/2041    | NA                          | NA                          | NA                          | R01_cb2834_c16/flp0/2041    |
| R01_cb4183_c2/flp0/1744     | NA                          | R01_cb4183_c2/flp0/1744     | NA                          | NA                          |
| R01_cb10694_c6/f9p0/596     | R01_cb10694_c6/f9p0/596     | NA                          | NA                          | R01_cb10694_c6/f9p0/596     |
| R01_cb8564_c19292/flp0/2784 | R01_cb8564_c19292/flp0/2784 | R01_cb8564_c19292/flp0/2784 | R01_cb8564_c19292/flp0/2784 | R01_cb8564_c19292/flp0/2784 |
| R01_cb3307_c43/flp0/1180    | NA                          | NA                          | NA                          | R01_cb3307_c43/flp0/1180    |
| R01_cb16913_c7/flp0/723     | NA                          | R01_cb16913_c7/flp0/723     | NA                          | NA                          |
| R01_cb10806_c2/flp0/858     | NA                          | R01_cb10806_c2/flp0/858     | NA                          | NA                          |
| R01_cb4803_c19/f2p0/2151    | NA                          | R01_cb4803_c19/f2p0/2151    | NA                          | NA                          |
| R01_cb8564_c84686/f2p0/3781 | NA                          | R01_cb8564_c84686/f2p0/3781 | NA                          | R01_cb8564_c84686/f2p0/3781 |
| R01_cb5062_c7/flp0/2640     | NA                          | R01_cb5062_c7/flp0/2640     | NA                          | NA                          |
| R01_cb13398_c0/f3p0/657     | R01_cb13398_c0/f3p0/657     | NA                          | NA                          | NA                          |
| R01_cb4637_c8/f3p0/844      | R01_cb4637_c8/f3p0/844      | NA                          | NA                          | NA                          |
| R01_cb10437_c0/f3p0/1073    | NA                          | NA                          | NA                          | R01_cb10437_c0/f3p0/1073    |
| R01_cb11187_c2/flp0/1444    | NA                          | NA                          | R01_cb11187_c2/flp0/1444    | R01_cb11187_c2/flp0/1444    |
| R01_cb11880_c8/f2p0/463     | NA                          | R01_cb11880_c8/f2p0/463     | R01_cb11880_c8/f2p0/463     | NA                          |
| R01_cb5331_c6/flp0/358      | R01_cb5331_c6/flp0/358      | R01_cb5331_c6/flp0/358      | R01_cb5331_c6/flp0/358      | R01_cb5331_c6/flp0/358      |
| R01_cb1300_c1/flp0/3303     | NA                          | R01_cb1300_c1/flp0/3303     | R01_cb1300_c1/flp0/3303     | NA                          |
| R01_cb2952_c1/flp0/3769     | NA                          | R01_cb2952_c1/flp0/3769     | NA                          | NA                          |
| R01_cb13748_c50/flp0/2299   | NA                          | R01_cb13748_c50/flp0/2299   | NA                          | NA                          |
| R01_cb10401_c3/flp1/625     | R01_cb10401_c3/flp1/625     | NA                          | NA                          | R01_cb10401_c3/flp1/625     |
| R01_cb13884_c18/flp0/765    | R01_cb13884_c18/flp0/765    | NA                          | R01_cb13884_c18/flp0/765    | R01_cb13884_c18/flp0/765    |

|                             |                             |                             |                             |                             |
|-----------------------------|-----------------------------|-----------------------------|-----------------------------|-----------------------------|
| R01_cb15168_c4/flp0/1841    | NA                          | NA                          | NA                          | R01_cb15168_c4/flp0/1841    |
| R01_cb2844_c7/flp0/2064     | NA                          | NA                          | NA                          | R01_cb2844_c7/flp0/2064     |
| R01_cb5471_c0/f7p0/2667     | NA                          | NA                          | NA                          | R01_cb5471_c0/f7p0/2667     |
| R01_cb167_c58/flp0/3304     | NA                          | NA                          | NA                          | R01_cb167_c58/flp0/3304     |
| R01_cb6236_c4/flp1/1795     | NA                          | NA                          | NA                          | R01_cb6236_c4/flp1/1795     |
| R01_cb10339_c4/flp0/1086    | NA                          | R01_cb10339_c4/flp0/1086    | NA                          | NA                          |
| R01_cb15624_c3/f2p0/649     | NA                          | R01_cb15624_c3/f2p0/649     | R01_cb15624_c3/f2p0/649     | R01_cb15624_c3/f2p0/649     |
| R01_cb8564_c40140/f2p0/3120 | R01_cb8564_c40140/f2p0/3120 | R01_cb8564_c40140/f2p0/3120 | R01_cb8564_c40140/f2p0/3120 | R01_cb8564_c40140/f2p0/3120 |
| R01_cb3832_c10/flp0/579     | NA                          | NA                          | NA                          | R01_cb3832_c10/flp0/579     |
| R01_cb8564_c23062/flp3/3805 | NA                          | R01_cb8564_c23062/flp3/3805 | NA                          | NA                          |
| R01_cb1846_c13/flp0/3358    | NA                          | R01_cb1846_c13/flp0/3358    | NA                          | NA                          |
| R01_cb18456_c945/flp1/809   | NA                          | R01_cb18456_c945/flp1/809   | NA                          | NA                          |
| R01_cb8564_c3161/flp1/2405  | NA                          | R01_cb8564_c3161/flp1/2405  | NA                          | NA                          |
| R01_cb15918_c9/flp0/553     | R01_cb15918_c9/flp0/553     | R01_cb15918_c9/flp0/553     | R01_cb15918_c9/flp0/553     | R01_cb15918_c9/flp0/553     |
| R01_cb6456_c8/flp0/913      | NA                          | NA                          | NA                          | R01_cb6456_c8/flp0/913      |
| R01_cb16686_c1/flp0/578     | R01_cb16686_c1/flp0/578     | R01_cb16686_c1/flp0/578     | R01_cb16686_c1/flp0/578     | R01_cb16686_c1/flp0/578     |
| R01_cb10880_c6/flp0/499     | R01_cb10880_c6/flp0/499     | R01_cb10880_c6/flp0/499     | NA                          | R01_cb10880_c6/flp0/499     |
| R01_cb8564_c12740/flp0/4531 | NA                          | R01_cb8564_c12740/flp0/4531 | NA                          | R01_cb8564_c12740/flp0/4531 |
| R01_cb8040_c16/flp0/2545    | NA                          | R01_cb8040_c16/flp0/2545    | NA                          | NA                          |
| R01_cb1333_c83/flp0/3385    | R01_cb1333_c83/flp0/3385    | R01_cb1333_c83/flp0/3385    | R01_cb1333_c83/flp0/3385    | R01_cb1333_c83/flp0/3385    |
| R01_cb11278_c3/flp0/2107    | NA                          | R01_cb11278_c3/flp0/2107    | R01_cb11278_c3/flp0/2107    | R01_cb11278_c3/flp0/2107    |
| R01_cb7219_c5/flp0/2701     | NA                          | NA                          | NA                          | R01_cb7219_c5/flp0/2701     |
| R01_cb11918_c17/flp0/1272   | NA                          | NA                          | NA                          | R01_cb11918_c17/flp0/1272   |
| R01_cb4501_c3/flp0/3331     | NA                          | NA                          | NA                          | R01_cb4501_c3/flp0/3331     |
| R01_cb3538_c4/flp0/3597     | NA                          | R01_cb3538_c4/flp0/3597     | NA                          | NA                          |

|                             |                             |                             |                             |                             |
|-----------------------------|-----------------------------|-----------------------------|-----------------------------|-----------------------------|
| R01_cb13761_c4/flp0/1251    | NA                          | R01_cb13761_c4/flp0/1251    | NA                          | NA                          |
| R01_cb2698_c2/flp0/1886     | NA                          | NA                          | NA                          | R01_cb2698_c2/flp0/1886     |
| R01_cb18456_c1030/flp1/992  | NA                          | R01_cb18456_c1030/flp1/992  | NA                          | NA                          |
| R01_cb13867_c18/flp0/834    | NA                          | NA                          | NA                          | R01_cb13867_c18/flp0/834    |
| R01_cb8564_c68300/f5p1/2665 | NA                          | NA                          | R01_cb8564_c68300/f5p1/2665 | NA                          |
| R01_cb2698_c6/flp0/1752     | NA                          | NA                          | NA                          | R01_cb2698_c6/flp0/1752     |
| R01_cb8564_c78655/flp0/4933 | NA                          | R01_cb8564_c78655/flp0/4933 | NA                          | NA                          |
| R01_cb8564_c38793/flp0/3221 | NA                          | R01_cb8564_c38793/flp0/3221 | R01_cb8564_c38793/flp0/3221 | NA                          |
| R01_cb16328_c1/flp0/1725    | NA                          | R01_cb16328_c1/flp0/1725    | NA                          | NA                          |
| R01_cb14532_c2/flp0/554     | R01_cb14532_c2/flp0/554     | NA                          | R01_cb14532_c2/flp0/554     | R01_cb14532_c2/flp0/554     |
| R01_cb7231_c21/flp0/891     | R01_cb7231_c21/flp0/891     | R01_cb7231_c21/flp0/891     | R01_cb7231_c21/flp0/891     | R01_cb7231_c21/flp0/891     |
| R01_cb8564_c5088/fl1p4/2131 | NA                          | NA                          | NA                          | R01_cb8564_c5088/fl1p4/2131 |
| R01_cb11560_c1/flp0/2849    | NA                          | NA                          | NA                          | R01_cb11560_c1/flp0/2849    |
| R01_cb8564_c48806/f2p0/4863 | NA                          | R01_cb8564_c48806/f2p0/4863 | NA                          | R01_cb8564_c48806/f2p0/4863 |
| R01_cb15676_c3/flp0/1620    | NA                          | NA                          | NA                          | R01_cb15676_c3/flp0/1620    |
| R01_cb9313_c7/flp0/1378     | NA                          | R01_cb9313_c7/flp0/1378     | NA                          | NA                          |
| R01_cb14091_c1/flp0/1634    | NA                          | R01_cb14091_c1/flp0/1634    | NA                          | NA                          |
| R01_cb13131_c24/flp0/1510   | NA                          | R01_cb13131_c24/flp0/1510   | NA                          | NA                          |
| R01_cb8564_c85386/flp0/3916 | NA                          | R01_cb8564_c85386/flp0/3916 | NA                          | NA                          |
| R01_cb11808_c1/flp0/2737    | NA                          | NA                          | NA                          | R01_cb11808_c1/flp0/2737    |
| R01_cb5248_c16/flp0/2669    | NA                          | R01_cb5248_c16/flp0/2669    | R01_cb5248_c16/flp0/2669    | R01_cb5248_c16/flp0/2669    |
| R01_cb6935_c1/flp0/2251     | NA                          | R01_cb6935_c1/flp0/2251     | NA                          | NA                          |
| R01_cb6631_c10/flp0/2272    | NA                          | NA                          | NA                          | R01_cb6631_c10/flp0/2272    |
| R01_cb8564_c81859/flp0/2968 | R01_cb8564_c81859/flp0/2968 | R01_cb8564_c81859/flp0/2968 | NA                          | NA                          |
| R01_cb11167_c2/flp0/448     | R01_cb11167_c2/flp0/448     | R01_cb11167_c2/flp0/448     | R01_cb11167_c2/flp0/448     | R01_cb11167_c2/flp0/448     |

|                              |                             |                             |                              |                              |
|------------------------------|-----------------------------|-----------------------------|------------------------------|------------------------------|
| R01_cb10792_c0/flp0/1754     | R01_cb10792_c0/flp0/1754    | R01_cb10792_c0/flp0/1754    | R01_cb10792_c0/flp0/1754     | R01_cb10792_c0/flp0/1754     |
| R01_cb8564_c120682/flp0/4126 | NA                          | NA                          | R01_cb8564_c120682/flp0/4126 | R01_cb8564_c120682/flp0/4126 |
| R01_cb8564_c37795/flp0/3540  | NA                          | NA                          | R01_cb8564_c37795/flp0/3540  | R01_cb8564_c37795/flp0/3540  |
| R01_cb5929_c8/flp2/2509      | NA                          | NA                          | NA                           | R01_cb5929_c8/flp2/2509      |
| R01_cb15713_c0/f2p0/349      | R01_cb15713_c0/f2p0/349     | R01_cb15713_c0/f2p0/349     | R01_cb15713_c0/f2p0/349      | R01_cb15713_c0/f2p0/349      |
| R01_cb12003_c35/flp0/1418    | NA                          | R01_cb12003_c35/flp0/1418   | NA                           | NA                           |
| R01_cb5622_c2/flp0/2496      | NA                          | NA                          | NA                           | R01_cb5622_c2/flp0/2496      |
| R01_cb8564_c3801/flp0/2058   | NA                          | R01_cb8564_c3801/flp0/2058  | R01_cb8564_c3801/flp0/2058   | NA                           |
| R01_cb1905_c2/f3p0/2454      | NA                          | R01_cb1905_c2/f3p0/2454     | R01_cb1905_c2/f3p0/2454      | NA                           |
| R01_cb18409_c102/flp0/603    | R01_cb18409_c102/flp0/603   | R01_cb18409_c102/flp0/603   | R01_cb18409_c102/flp0/603    | R01_cb18409_c102/flp0/603    |
| R01_cb14574_c0/f3p0/879      | NA                          | NA                          | NA                           | R01_cb14574_c0/f3p0/879      |
| R01_cb1860_c35/fl8p4/2527    | NA                          | NA                          | NA                           | R01_cb1860_c35/fl8p4/2527    |
| R01_cb12847_c0/f4p0/1466     | NA                          | NA                          | NA                           | R01_cb12847_c0/f4p0/1466     |
| R01_cb15914_c0/flp0/987      | NA                          | NA                          | NA                           | R01_cb15914_c0/flp0/987      |
| R01_cb8564_c2850/flp0/3044   | NA                          | R01_cb8564_c2850/flp0/3044  | R01_cb8564_c2850/flp0/3044   | NA                           |
| R01_cb13134_c3/flp0/1383     | NA                          | NA                          | NA                           | R01_cb13134_c3/flp0/1383     |
| R01_cb8564_c21470/flp0/3642  | R01_cb8564_c21470/flp0/3642 | R01_cb8564_c21470/flp0/3642 | R01_cb8564_c21470/flp0/3642  | R01_cb8564_c21470/flp0/3642  |
| R01_cb6719_c57/flp0/3012     | R01_cb6719_c57/flp0/3012    | NA                          | NA                           | R01_cb6719_c57/flp0/3012     |
| R01_cb14831_c5/flp0/1090     | NA                          | NA                          | NA                           | R01_cb14831_c5/flp0/1090     |
| R01_cb8564_c84227/flp0/4645  | NA                          | R01_cb8564_c84227/flp0/4645 | R01_cb8564_c84227/flp0/4645  | R01_cb8564_c84227/flp0/4645  |
| R01_cb18456_c7577/flp0/861   | NA                          | R01_cb18456_c7577/flp0/861  | R01_cb18456_c7577/flp0/861   | R01_cb18456_c7577/flp0/861   |
| R01_cb13254_c5/flp0/1299     | NA                          | R01_cb13254_c5/flp0/1299    | NA                           | R01_cb13254_c5/flp0/1299     |
| R01_cb15588_c2/flp0/1647     | NA                          | R01_cb15588_c2/flp0/1647    | NA                           | NA                           |
| R01_cb15474_c2/flp0/1866     | NA                          | NA                          | NA                           | R01_cb15474_c2/flp0/1866     |

|                              |                           |                              |                            |                             |
|------------------------------|---------------------------|------------------------------|----------------------------|-----------------------------|
| R01_cb10024_c401/f1p0/464    | R01_cb10024_c401/f1p0/464 | R01_cb10024_c401/f1p0/464    | R01_cb10024_c401/f1p0/464  | NA                          |
| R01_cb12837_c19/f1p0/773     | NA                        | R01_cb12837_c19/f1p0/773     | NA                         | NA                          |
| R01_cb12828_c5/f1p1/1544     | NA                        | R01_cb12828_c5/f1p1/1544     | NA                         | NA                          |
| R01_cb5828_c1/f1p0/3002      | NA                        | NA                           | NA                         | R01_cb5828_c1/f1p0/3002     |
| R01_cb14126_c0/f1p0/926      | R01_cb14126_c0/f1p0/926   | NA                           | NA                         | NA                          |
| R01_cb17921_c1/f1p0/786      | NA                        | R01_cb17921_c1/f1p0/786      | NA                         | NA                          |
| R01_cb15849_c1/f1p0/852      | NA                        | NA                           | NA                         | R01_cb15849_c1/f1p0/852     |
| R01_cb8564_c90138/f1p0/3662  | NA                        | NA                           | NA                         | R01_cb8564_c90138/f1p0/3662 |
| R01_cb14228_c15/f2p0/623     | NA                        | NA                           | NA                         | R01_cb14228_c15/f2p0/623    |
| R01_cb14487_c0/f2p0/1251     | NA                        | NA                           | NA                         | R01_cb14487_c0/f2p0/1251    |
| R01_cb3421_c16/f1p0/2946     | NA                        | NA                           | NA                         | R01_cb3421_c16/f1p0/2946    |
| R01_cb10280_c3/f1p0/1292     | NA                        | R01_cb10280_c3/f1p0/1292     | NA                         | NA                          |
| R01_cb10712_c2/f1p1/3797     | NA                        | R01_cb10712_c2/f1p1/3797     | NA                         | NA                          |
| R01_cb4584_c10/f1p0/3485     | NA                        | NA                           | NA                         | R01_cb4584_c10/f1p0/3485    |
| R01_cb13433_c174/f1p0/1039   | NA                        | R01_cb13433_c174/f1p0/1039   | NA                         | NA                          |
| R01_cb1297_c8/f2p0/3590      | NA                        | NA                           | NA                         | R01_cb1297_c8/f2p0/3590     |
| R01_cb8564_c117838/f1p0/1993 | NA                        | R01_cb8564_c117838/f1p0/1993 | NA                         | NA                          |
| R01_cb5745_c10/f3p0/1397     | NA                        | NA                           | NA                         | R01_cb5745_c10/f3p0/1397    |
| R01_cb737_c11/f2p0/348       | R01_cb737_c11/f2p0/348    | R01_cb737_c11/f2p0/348       | R01_cb737_c11/f2p0/348     | R01_cb737_c11/f2p0/348      |
| R01_cb3570_c10/f1p0/2945     | NA                        | NA                           | NA                         | R01_cb3570_c10/f1p0/2945    |
| R01_cb3695_c1/f1p0/3553      | NA                        | NA                           | NA                         | R01_cb3695_c1/f1p0/3553     |
| R01_cb4945_c16/f1p0/1836     | NA                        | R01_cb4945_c16/f1p0/1836     | NA                         | NA                          |
| R01_cb2104_c5/f1p0/2660      | NA                        | R01_cb2104_c5/f1p0/2660      | R01_cb2104_c5/f1p0/2660    | R01_cb2104_c5/f1p0/2660     |
| R01_cb8564_c4624/f1p1/1970   | NA                        | R01_cb8564_c4624/f1p1/1970   | R01_cb8564_c4624/f1p1/1970 | R01_cb8564_c4624/f1p1/1970  |
| R01_cb8564_c84460/f1p0/2544  | NA                        | R01_cb8564_c84460/f1p0/2544  | NA                         | NA                          |



|                             |                             |                             |                             |                             |
|-----------------------------|-----------------------------|-----------------------------|-----------------------------|-----------------------------|
| R01_cb4493_c9/flp0/4495     | NA                          | NA                          | NA                          | R01_cb4493_c9/flp0/4495     |
| R01_cb8564_c4492/flp0/2634  | NA                          | R01_cb8564_c4492/flp0/2634  | NA                          | R01_cb8564_c4492/flp0/2634  |
| R01_cb15093_c2/flp0/1481    | NA                          | NA                          | NA                          | R01_cb15093_c2/flp0/1481    |
| R01_cb12094_c20/flp0/1794   | NA                          | R01_cb12094_c20/flp0/1794   | NA                          | NA                          |
| R01_cb8335_c13/flp0/2125    | NA                          | NA                          | NA                          | R01_cb8335_c13/flp0/2125    |
| R01_cb7611_c6/flp0/2472     | NA                          | NA                          | NA                          | R01_cb7611_c6/flp0/2472     |
| R01_cb4762_c1/flp0/3263     | NA                          | R01_cb4762_c1/flp0/3263     | NA                          | NA                          |
| R01_cb8564_c91447/flp0/2758 | NA                          | NA                          | R01_cb8564_c91447/flp0/2758 | R01_cb8564_c91447/flp0/2758 |
| R01_cb7642_c243/flp0/604    | NA                          | R01_cb7642_c243/flp0/604    | NA                          | NA                          |
| R01_cb6170_c5/f3p0/2859     | NA                          | NA                          | NA                          | R01_cb6170_c5/f3p0/2859     |
| R01_cb8564_c77410/flp0/2021 | NA                          | R01_cb8564_c77410/flp0/2021 | R01_cb8564_c77410/flp0/2021 | R01_cb8564_c77410/flp0/2021 |
| R01_cb16979_c17/flp0/1821   | R01_cb16979_c17/flp0/1821   | R01_cb16979_c17/flp0/1821   | NA                          | NA                          |
| R01_cb3243_c4/flp1/1979     | NA                          | NA                          | NA                          | R01_cb3243_c4/flp1/1979     |
| R01_cb17196_c1/flp0/840     | R01_cb17196_c1/flp0/840     | R01_cb17196_c1/flp0/840     | R01_cb17196_c1/flp0/840     | R01_cb17196_c1/flp0/840     |
| R01_cb8564_c34043/f2p0/3199 | R01_cb8564_c34043/f2p0/3199 | R01_cb8564_c34043/f2p0/3199 | R01_cb8564_c34043/f2p0/3199 | R01_cb8564_c34043/f2p0/3199 |
| R01_cb5258_c4/f2p0/1009     | NA                          | NA                          | NA                          | R01_cb5258_c4/f2p0/1009     |
| R01_cb6507_c7/flp0/1069     | NA                          | NA                          | NA                          | R01_cb6507_c7/flp0/1069     |
| R01_cb13064_c2/flp0/1598    | NA                          | NA                          | NA                          | R01_cb13064_c2/flp0/1598    |
| R01_cb18689_c1/flp0/2692    | NA                          | R01_cb18689_c1/flp0/2692    | R01_cb18689_c1/flp0/2692    | NA                          |
| R01_cb1812_c58/flp0/2398    | NA                          | R01_cb1812_c58/flp0/2398    | NA                          | NA                          |
| R01_cb17137_c3/flp1/1861    | NA                          | R01_cb17137_c3/flp1/1861    | NA                          | NA                          |
| R01_cb16627_c1/flp0/544     | R01_cb16627_c1/flp0/544     | R01_cb16627_c1/flp0/544     | R01_cb16627_c1/flp0/544     | R01_cb16627_c1/flp0/544     |
| R01_cb6399_c13/flp0/473     | R01_cb6399_c13/flp0/473     | R01_cb6399_c13/flp0/473     | NA                          | NA                          |
| R01_cb18623_c1/flp0/3283    | NA                          | R01_cb18623_c1/flp0/3283    | R01_cb18623_c1/flp0/3283    | NA                          |
| R01_cb12696_c16/flp4/819    | NA                          | R01_cb12696_c16/flp4/819    | NA                          | NA                          |

|                              |                          |                             |                          |                              |
|------------------------------|--------------------------|-----------------------------|--------------------------|------------------------------|
| R01_cb11250_c0/flp0/841      | R01_cb11250_c0/flp0/841  | R01_cb11250_c0/flp0/841     | R01_cb11250_c0/flp0/841  | R01_cb11250_c0/flp0/841      |
| R01_cb18132_c25/flp0/958     | NA                       | R01_cb18132_c25/flp0/958    | R01_cb18132_c25/flp0/958 | NA                           |
| R01_cb2497_c5/flp0/3897      | NA                       | NA                          | NA                       | R01_cb2497_c5/flp0/3897      |
| R01_cb11081_c4/flp0/692      | NA                       | R01_cb11081_c4/flp0/692     | R01_cb11081_c4/flp0/692  | R01_cb11081_c4/flp0/692      |
| R01_cb6345_c3/flp0/638       | NA                       | NA                          | NA                       | R01_cb6345_c3/flp0/638       |
| R01_cb15811_c19/flp0/435     | NA                       | R01_cb15811_c19/flp0/435    | R01_cb15811_c19/flp0/435 | R01_cb15811_c19/flp0/435     |
| R01_cb9119_c3/f3p2/2173      | NA                       | NA                          | NA                       | R01_cb9119_c3/f3p2/2173      |
| R01_cb8564_c24550/flp0/2875  | NA                       | R01_cb8564_c24550/flp0/2875 | NA                       | NA                           |
| R01_cb7027_c6/flp0/5802      | NA                       | R01_cb7027_c6/flp0/5802     | NA                       | NA                           |
| R01_cb1170_c0/flp0/4446      | R01_cb1170_c0/flp0/4446  | R01_cb1170_c0/flp0/4446     | R01_cb1170_c0/flp0/4446  | NA                           |
| R01_cb16655_c3/flp0/1854     | R01_cb16655_c3/flp0/1854 | R01_cb16655_c3/flp0/1854    | NA                       | NA                           |
| R01_cb17383_c2/flp0/870      | NA                       | NA                          | NA                       | R01_cb17383_c2/flp0/870      |
| R01_cb11165_c8/flp0/1161     | NA                       | NA                          | NA                       | R01_cb11165_c8/flp0/1161     |
| R01_cb12012_c0/flp0/1269     | NA                       | NA                          | NA                       | R01_cb12012_c0/flp0/1269     |
| R01_cb15907_c2/flp0/681      | NA                       | R01_cb15907_c2/flp0/681     | NA                       | R01_cb15907_c2/flp0/681      |
| R01_cb8564_c81991/f3p1/3306  | NA                       | NA                          | NA                       | R01_cb8564_c81991/f3p1/3306  |
| R01_cb8564_c130246/flp1/2268 | NA                       | NA                          | NA                       | R01_cb8564_c130246/flp1/2268 |
| R01_cb16238_c1/flp0/1061     | NA                       | R01_cb16238_c1/flp0/1061    | NA                       | NA                           |
| R01_cb7926_c3/flp0/2347      | R01_cb7926_c3/flp0/2347  | R01_cb7926_c3/flp0/2347     | NA                       | R01_cb7926_c3/flp0/2347      |
| R01_cb8027_c5/flp0/2360      | NA                       | R01_cb8027_c5/flp0/2360     | NA                       | NA                           |
| R01_cb8564_c91691/flp0/3046  | NA                       | NA                          | NA                       | R01_cb8564_c91691/flp0/3046  |
| R01_cb15756_c0/f2p0/644      | NA                       | NA                          | NA                       | R01_cb15756_c0/f2p0/644      |
| R01_cb8564_c83619/flp0/2534  | NA                       | NA                          | NA                       | R01_cb8564_c83619/flp0/2534  |
| R01_cb7899_c3/flp0/1819      | NA                       | NA                          | NA                       | R01_cb7899_c3/flp0/1819      |
| R01_cb12401_c4/flp0/440      | R01_cb12401_c4/flp0/440  | R01_cb12401_c4/flp0/440     | R01_cb12401_c4/flp0/440  | NA                           |

|                                  |                            |                                  |                             |                             |
|----------------------------------|----------------------------|----------------------------------|-----------------------------|-----------------------------|
| R01_cb8564_c1105/flp0/2127       | NA                         | NA                               | R01_cb8564_c1105/flp0/2127  | NA                          |
| R01_cb8564_c35399/flp0/4553      | NA                         | NA                               | NA                          | R01_cb8564_c35399/flp0/4553 |
| R01_cb11900_c3/f2p0/419          | NA                         | R01_cb11900_c3/f2p0/419          | NA                          | R01_cb11900_c3/f2p0/419     |
| R01_cb18456_c2519/flp0/1727      | NA                         | R01_cb18456_c2519/flp0/1727      | NA                          | R01_cb18456_c2519/flp0/1727 |
| R01_cb15912_c2/flp0/1329         | NA                         | NA                               | NA                          | R01_cb15912_c2/flp0/1329    |
| R01_cb9260_c2/flp1/1973          | NA                         | R01_cb9260_c2/flp1/1973          | NA                          | R01_cb9260_c2/flp1/1973     |
| R01_cb8564_c82332/flp0/2714      | NA                         | R01_cb8564_c82332/flp0/2714      | NA                          | NA                          |
| R01_cb10055_c19/flp0/759         | NA                         | R01_cb10055_c19/flp0/759         | NA                          | NA                          |
| R01_cb8564_c119335/flp0/288<br>1 | NA                         | R01_cb8564_c119335/flp0/288<br>1 | NA                          | NA                          |
| R01_cb12496_c11/flp0/1288        | NA                         | R01_cb12496_c11/flp0/1288        | NA                          | NA                          |
| R01_cb17315_c0/flp0/484          | NA                         | R01_cb17315_c0/flp0/484          | NA                          | NA                          |
| R01_cb18261_c2/flp0/792          | R01_cb18261_c2/flp0/792    | NA                               | NA                          | NA                          |
| R01_cb1860_c18/flp0/2458         | NA                         | NA                               | NA                          | R01_cb1860_c18/flp0/2458    |
| R01_cb18456_c6074/flp1/640       | R01_cb18456_c6074/flp1/640 | R01_cb18456_c6074/flp1/640       | R01_cb18456_c6074/flp1/640  | R01_cb18456_c6074/flp1/640  |
| R01_cb10437_c2/flp0/2241         | NA                         | R01_cb10437_c2/flp0/2241         | R01_cb10437_c2/flp0/2241    | R01_cb10437_c2/flp0/2241    |
| R01_cb17626_c1/flp0/1152         | NA                         | R01_cb17626_c1/flp0/1152         | NA                          | NA                          |
| R01_cb18005_c6/flp0/1205         | NA                         | R01_cb18005_c6/flp0/1205         | R01_cb18005_c6/flp0/1205    | R01_cb18005_c6/flp0/1205    |
| R01_cb18649_c3/flp0/5011         | NA                         | NA                               | NA                          | R01_cb18649_c3/flp0/5011    |
| R01_cb18456_c7507/flp0/1050      | NA                         | R01_cb18456_c7507/flp0/1050      | R01_cb18456_c7507/flp0/1050 | R01_cb18456_c7507/flp0/1050 |
| R01_cb18600_c1/flp0/1478         | NA                         | R01_cb18600_c1/flp0/1478         | R01_cb18600_c1/flp0/1478    | R01_cb18600_c1/flp0/1478    |
| R01_cb1236_c1/flp0/2256          | NA                         | R01_cb1236_c1/flp0/2256          | NA                          | NA                          |
| R01_cb7303_c16/f7p0/2554         | NA                         | NA                               | NA                          | R01_cb7303_c16/f7p0/2554    |
| R01_cb4708_c7/flp0/1963          | NA                         | R01_cb4708_c7/flp0/1963          | NA                          | NA                          |
| R01_cb10029_c658/flp0/783        | NA                         | R01_cb10029_c658/flp0/783        | NA                          | NA                          |
| R01_cb12037_c9/flp0/1595         | NA                         | NA                               | R01_cb12037_c9/flp0/1595    | NA                          |

|                              |                             |                              |                            |                              |
|------------------------------|-----------------------------|------------------------------|----------------------------|------------------------------|
| R01_cb15747_c0/f2p0/579      | R01_cb15747_c0/f2p0/579     | R01_cb15747_c0/f2p0/579      | NA                         | R01_cb15747_c0/f2p0/579      |
| R01_cb11769_c1/flp0/2426     | NA                          | R01_cb11769_c1/flp0/2426     | NA                         | NA                           |
| R01_cb18456_c1434/f3p0/444   | NA                          | R01_cb18456_c1434/f3p0/444   | R01_cb18456_c1434/f3p0/444 | R01_cb18456_c1434/f3p0/444   |
| R01_cb7802_c11/flp1/1784     | NA                          | NA                           | NA                         | R01_cb7802_c11/flp1/1784     |
| R01_cb8564_c121475/flp0/2123 | NA                          | R01_cb8564_c121475/flp0/2123 | NA                         | R01_cb8564_c121475/flp0/2123 |
| R01_cb18456_c7766/f49p2/805  | R01_cb18456_c7766/f49p2/805 | NA                           | NA                         | NA                           |
| R01_cb3482_c34/flp0/1154     | R01_cb3482_c34/flp0/1154    | R01_cb3482_c34/flp0/1154     | NA                         | NA                           |
| R01_cb9513_c37/flp1/2223     | NA                          | R01_cb9513_c37/flp1/2223     | NA                         | NA                           |
| R01_cb3518_c21/flp0/1435     | NA                          | NA                           | NA                         | R01_cb3518_c21/flp0/1435     |
| R01_cb5324_c1/flp0/3819      | R01_cb5324_c1/flp0/3819     | R01_cb5324_c1/flp0/3819      | R01_cb5324_c1/flp0/3819    | R01_cb5324_c1/flp0/3819      |
| R01_cb567_c21/flp0/2857      | NA                          | NA                           | NA                         | R01_cb567_c21/flp0/2857      |
| R01_cb11251_c2/flp0/1662     | NA                          | R01_cb11251_c2/flp0/1662     | R01_cb11251_c2/flp0/1662   | R01_cb11251_c2/flp0/1662     |
| R01_cb13601_c2/f2p0/846      | NA                          | NA                           | NA                         | R01_cb13601_c2/f2p0/846      |
| R01_cb8564_c85196/flp0/2974  | NA                          | R01_cb8564_c85196/flp0/2974  | NA                         | R01_cb8564_c85196/flp0/2974  |
| R01_cb8564_c22080/flp0/4057  | NA                          | R01_cb8564_c22080/flp0/4057  | NA                         | NA                           |
| R01_cb6644_c3/flp0/447       | R01_cb6644_c3/flp0/447      | R01_cb6644_c3/flp0/447       | R01_cb6644_c3/flp0/447     | R01_cb6644_c3/flp0/447       |
| R01_cb1228_c21/flp0/2612     | NA                          | NA                           | NA                         | R01_cb1228_c21/flp0/2612     |
| R01_cb4657_c21/flp0/2134     | NA                          | R01_cb4657_c21/flp0/2134     | R01_cb4657_c21/flp0/2134   | NA                           |
| R01_cb6839_c6/flp0/856       | NA                          | R01_cb6839_c6/flp0/856       | R01_cb6839_c6/flp0/856     | R01_cb6839_c6/flp0/856       |
| R01_cb11023_c1/flp0/2469     | NA                          | R01_cb11023_c1/flp0/2469     | NA                         | NA                           |
| R01_cb1301_c4/flp0/3013      | NA                          | NA                           | NA                         | R01_cb1301_c4/flp0/3013      |
| R01_cb1905_c22/flp0/2509     | NA                          | NA                           | R01_cb1905_c22/flp0/2509   | R01_cb1905_c22/flp0/2509     |
| R01_cb15860_c1/flp0/613      | NA                          | R01_cb15860_c1/flp0/613      | NA                         | R01_cb15860_c1/flp0/613      |
| R01_cb13910_c2/f2p0/1454     | R01_cb13910_c2/f2p0/1454    | R01_cb13910_c2/f2p0/1454     | R01_cb13910_c2/f2p0/1454   | R01_cb13910_c2/f2p0/1454     |

|                             |                             |                             |                             |                             |
|-----------------------------|-----------------------------|-----------------------------|-----------------------------|-----------------------------|
| R01_cb11376_c1/f1p0/3720    | R01_cb11376_c1/f1p0/3720    | R01_cb11376_c1/f1p0/3720    | R01_cb11376_c1/f1p0/3720    | R01_cb11376_c1/f1p0/3720    |
| R01_cb13033_c7/f1p0/946     | NA                          | R01_cb13033_c7/f1p0/946     | R01_cb13033_c7/f1p0/946     | R01_cb13033_c7/f1p0/946     |
| R01_cb8564_c21912/f1p0/2701 | NA                          | R01_cb8564_c21912/f1p0/2701 | NA                          | NA                          |
| R01_cb17790_c1/f1p0/1110    | NA                          | R01_cb17790_c1/f1p0/1110    | NA                          | NA                          |
| R01_cb8564_c69437/f1p0/2197 | NA                          | NA                          | NA                          | R01_cb8564_c69437/f1p0/2197 |
| R01_cb8564_c50652/f1p0/4850 | NA                          | R01_cb8564_c50652/f1p0/4850 | R01_cb8564_c50652/f1p0/4850 | R01_cb8564_c50652/f1p0/4850 |
| R01_cb16069_c3/f1p0/433     | R01_cb16069_c3/f1p0/433     | R01_cb16069_c3/f1p0/433     | R01_cb16069_c3/f1p0/433     | R01_cb16069_c3/f1p0/433     |
| R01_cb11465_c1/f1p0/2244    | NA                          | NA                          | NA                          | R01_cb11465_c1/f1p0/2244    |
| R01_cb18020_c0/f2p0/417     | R01_cb18020_c0/f2p0/417     | R01_cb18020_c0/f2p0/417     | R01_cb18020_c0/f2p0/417     | R01_cb18020_c0/f2p0/417     |
| R01_cb9445_c0/f2p0/2026     | R01_cb9445_c0/f2p0/2026     | R01_cb9445_c0/f2p0/2026     | R01_cb9445_c0/f2p0/2026     | R01_cb9445_c0/f2p0/2026     |
| R01_cb18705_c1/f1p0/1197    | R01_cb18705_c1/f1p0/1197    | R01_cb18705_c1/f1p0/1197    | R01_cb18705_c1/f1p0/1197    | R01_cb18705_c1/f1p0/1197    |
| R01_cb12785_c23/f1p0/931    | NA                          | R01_cb12785_c23/f1p0/931    | R01_cb12785_c23/f1p0/931    | R01_cb12785_c23/f1p0/931    |
| R01_cb14522_c0/f2p0/1641    | R01_cb14522_c0/f2p0/1641    | R01_cb14522_c0/f2p0/1641    | R01_cb14522_c0/f2p0/1641    | R01_cb14522_c0/f2p0/1641    |
| R01_cb10802_c1/f1p0/2343    | NA                          | R01_cb10802_c1/f1p0/2343    | NA                          | NA                          |
| R01_cb13897_c0/f1p0/323     | R01_cb13897_c0/f1p0/323     | R01_cb13897_c0/f1p0/323     | R01_cb13897_c0/f1p0/323     | R01_cb13897_c0/f1p0/323     |
| R01_cb15053_c2/f2p0/730     | NA                          | R01_cb15053_c2/f2p0/730     | R01_cb15053_c2/f2p0/730     | NA                          |
| R01_cb6251_c0/f4p0/694      | NA                          | R01_cb6251_c0/f4p0/694      | NA                          | NA                          |
| R01_cb8564_c86540/f1p0/3465 | NA                          | NA                          | NA                          | R01_cb8564_c86540/f1p0/3465 |
| R01_cb5929_c0/f2p2/2556     | NA                          | NA                          | NA                          | R01_cb5929_c0/f2p2/2556     |
| R01_cb3745_c1/f1p0/2535     | R01_cb3745_c1/f1p0/2535     | R01_cb3745_c1/f1p0/2535     | R01_cb3745_c1/f1p0/2535     | NA                          |
| R01_cb9790_c2/f1p0/1891     | NA                          | R01_cb9790_c2/f1p0/1891     | NA                          | NA                          |
| R01_cb8564_c90834/f1p0/3532 | R01_cb8564_c90834/f1p0/3532 | NA                          | NA                          | NA                          |
| R01_cb12677_c1/f1p0/883     | NA                          | R01_cb12677_c1/f1p0/883     | NA                          | R01_cb12677_c1/f1p0/883     |
| R01_cb10392_c1/f1p0/2682    | NA                          | R01_cb10392_c1/f1p0/2682    | NA                          | NA                          |
| R01_cb5664_c1/f1p0/2358     | R01_cb5664_c1/f1p0/2358     | R01_cb5664_c1/f1p0/2358     | R01_cb5664_c1/f1p0/2358     | R01_cb5664_c1/f1p0/2358     |

|                              |                            |                             |                             |                              |
|------------------------------|----------------------------|-----------------------------|-----------------------------|------------------------------|
| R01_cb18456_c6791/flp0/924   | R01_cb18456_c6791/flp0/924 | R01_cb18456_c6791/flp0/924  | R01_cb18456_c6791/flp0/924  | R01_cb18456_c6791/flp0/924   |
| R01_cb6125_c0/flp0/2935      | R01_cb6125_c0/flp0/2935    | R01_cb6125_c0/flp0/2935     | R01_cb6125_c0/flp0/2935     | R01_cb6125_c0/flp0/2935      |
| R01_cb10693_c2/flp1/2329     | NA                         | NA                          | NA                          | R01_cb10693_c2/flp1/2329     |
| R01_cb13781_c11/f2p0/631     | NA                         | NA                          | NA                          | R01_cb13781_c11/f2p0/631     |
| R01_cb17967_c1/flp0/1125     | NA                         | R01_cb17967_c1/flp0/1125    | NA                          | NA                           |
| R01_cb11491_c1/flp0/3826     | R01_cb11491_c1/flp0/3826   | R01_cb11491_c1/flp0/3826    | R01_cb11491_c1/flp0/3826    | R01_cb11491_c1/flp0/3826     |
| R01_cb11551_c1/flp0/2866     | NA                         | NA                          | NA                          | R01_cb11551_c1/flp0/2866     |
| R01_cb4824_c8/flp0/3007      | NA                         | R01_cb4824_c8/flp0/3007     | R01_cb4824_c8/flp0/3007     | R01_cb4824_c8/flp0/3007      |
| R01_cb11041_c1/flp0/1938     | NA                         | R01_cb11041_c1/flp0/1938    | NA                          | NA                           |
| R01_cb9108_c3/flp0/1311      | NA                         | NA                          | NA                          | R01_cb9108_c3/flp0/1311      |
| R01_cb8053_c9/f9p3/2468      | NA                         | NA                          | NA                          | R01_cb8053_c9/f9p3/2468      |
| R01_cb18301_c16/flp0/1538    | R01_cb18301_c16/flp0/1538  | R01_cb18301_c16/flp0/1538   | R01_cb18301_c16/flp0/1538   | R01_cb18301_c16/flp0/1538    |
| R01_cb5635_c1/flp0/3052      | NA                         | NA                          | NA                          | R01_cb5635_c1/flp0/3052      |
| R01_cb15951_c1/f2p0/655      | NA                         | R01_cb15951_c1/f2p0/655     | R01_cb15951_c1/f2p0/655     | R01_cb15951_c1/f2p0/655      |
| R01_cb11473_c0/flp0/960      | NA                         | R01_cb11473_c0/flp0/960     | NA                          | NA                           |
| R01_cb18456_c7544/flp0/1144  | NA                         | R01_cb18456_c7544/flp0/1144 | NA                          | NA                           |
| R01_cb8564_c73072/flp0/2431  | NA                         | NA                          | NA                          | R01_cb8564_c73072/flp0/2431  |
| R01_cb16692_c0/f5p0/484      | NA                         | NA                          | NA                          | R01_cb16692_c0/f5p0/484      |
| R01_cb18456_c1779/flp1/1333  | NA                         | R01_cb18456_c1779/flp1/1333 | NA                          | NA                           |
| R01_cb13808_c0/f3p1/624      | NA                         | R01_cb13808_c0/f3p1/624     | NA                          | R01_cb13808_c0/f3p1/624      |
| R01_cb12003_c136/flp0/1359   | NA                         | R01_cb12003_c136/flp0/1359  | NA                          | NA                           |
| R01_cb8564_c17689/flp0/3643  | NA                         | R01_cb8564_c17689/flp0/3643 | R01_cb8564_c17689/flp0/3643 | R01_cb8564_c17689/flp0/3643  |
| R01_cb8564_c110827/flp0/1850 | NA                         | NA                          | NA                          | R01_cb8564_c110827/flp0/1850 |
| R01_cb6591_c18/flp1/710      | R01_cb6591_c18/flp1/710    | R01_cb6591_c18/flp1/710     | NA                          | NA                           |
| R01_cb18476_c1/flp0/738      | NA                         | NA                          | NA                          | R01_cb18476_c1/flp0/738      |

|                             |                             |                             |                             |                             |
|-----------------------------|-----------------------------|-----------------------------|-----------------------------|-----------------------------|
| R01_cb2403_c3/flp0/1688     | R01_cb2403_c3/flp0/1688     | R01_cb2403_c3/flp0/1688     | R01_cb2403_c3/flp0/1688     | R01_cb2403_c3/flp0/1688     |
| R01_cb12363_c7/flp0/1153    | NA                          | NA                          | NA                          | R01_cb12363_c7/flp0/1153    |
| R01_cb8564_c91896/flp0/2444 | NA                          | R01_cb8564_c91896/flp0/2444 | NA                          | NA                          |
| R01_cb13545_c55/flp0/1266   | NA                          | R01_cb13545_c55/flp0/1266   | NA                          | R01_cb13545_c55/flp0/1266   |
| R01_cb8564_c80576/flp0/2840 | NA                          | NA                          | NA                          | R01_cb8564_c80576/flp0/2840 |
| R01_cb8564_c69139/f2p0/3547 | NA                          | R01_cb8564_c69139/f2p0/3547 | NA                          | NA                          |
| R01_cb8564_c3046/flp0/4037  | NA                          | R01_cb8564_c3046/flp0/4037  | NA                          | NA                          |
| R01_cb14261_c2/flp0/1483    | R01_cb14261_c2/flp0/1483    | R01_cb14261_c2/flp0/1483    | R01_cb14261_c2/flp0/1483    | R01_cb14261_c2/flp0/1483    |
| R01_cb8564_c83126/flp0/3424 | R01_cb8564_c83126/flp0/3424 | R01_cb8564_c83126/flp0/3424 | NA                          | NA                          |
| R01_cb8564_c25173/flp1/3583 | NA                          | NA                          | NA                          | R01_cb8564_c25173/flp1/3583 |
| R01_cb3791_c17/f4p2/1499    | NA                          | NA                          | NA                          | R01_cb3791_c17/f4p2/1499    |
| R01_cb1425_c5/flp0/3737     | NA                          | NA                          | NA                          | R01_cb1425_c5/flp0/3737     |
| R01_cb18355_c1/flp0/958     | R01_cb18355_c1/flp0/958     | R01_cb18355_c1/flp0/958     | R01_cb18355_c1/flp0/958     | NA                          |
| R01_cb2763_c5/flp0/1506     | NA                          | R01_cb2763_c5/flp0/1506     | NA                          | NA                          |
| R01_cb8564_c42131/flp0/3182 | R01_cb8564_c42131/flp0/3182 | R01_cb8564_c42131/flp0/3182 | R01_cb8564_c42131/flp0/3182 | R01_cb8564_c42131/flp0/3182 |
| R01_cb10983_c0/flp0/1170    | NA                          | NA                          | NA                          | R01_cb10983_c0/flp0/1170    |
| R01_cb8564_c87127/flp0/1943 | NA                          | R01_cb8564_c87127/flp0/1943 | R01_cb8564_c87127/flp0/1943 | R01_cb8564_c87127/flp0/1943 |
| R01_cb5054_c4/flp0/1732     | NA                          | R01_cb5054_c4/flp0/1732     | NA                          | NA                          |
| R01_cb1964_c0/f2p0/2285     | NA                          | R01_cb1964_c0/f2p0/2285     | NA                          | R01_cb1964_c0/f2p0/2285     |
| R01_cb6452_c13/flp0/1330    | NA                          | NA                          | NA                          | R01_cb6452_c13/flp0/1330    |
| R01_cb9523_c3/flp0/1657     | NA                          | R01_cb9523_c3/flp0/1657     | NA                          | NA                          |
| R01_cb18456_c1854/flp0/1089 | NA                          | NA                          | NA                          | R01_cb18456_c1854/flp0/1089 |
| R01_cb16981_c6/flp1/538     | NA                          | NA                          | NA                          | R01_cb16981_c6/flp1/538     |
| R01_cb4180_c7/flp1/6833     | NA                          | NA                          | NA                          | R01_cb4180_c7/flp1/6833     |

|                              |                              |                              |                              |                              |
|------------------------------|------------------------------|------------------------------|------------------------------|------------------------------|
| R01_cb11120_c1/flp0/667      | NA                           | NA                           | R01_cb11120_c1/flp0/667      | R01_cb11120_c1/flp0/667      |
| R01_cb13012_c5/flp0/1143     | NA                           | NA                           | NA                           | R01_cb13012_c5/flp0/1143     |
| R01_cb15459_c0/f3p0/806      | NA                           | R01_cb15459_c0/f3p0/806      | NA                           | NA                           |
| R01_cb8414_c2/flp0/1509      | NA                           | NA                           | NA                           | R01_cb8414_c2/flp0/1509      |
| R01_cb17838_c2/flp0/459      | NA                           | NA                           | R01_cb17838_c2/flp0/459      | R01_cb17838_c2/flp0/459      |
| R01_cb8564_c122267/flp0/2906 | R01_cb8564_c122267/flp0/2906 | R01_cb8564_c122267/flp0/2906 | R01_cb8564_c122267/flp0/2906 | NA                           |
| R01_cb1230_c6/flp0/4152      | NA                           | R01_cb1230_c6/flp0/4152      | R01_cb1230_c6/flp0/4152      | R01_cb1230_c6/flp0/4152      |
| R01_cb11178_c2/flp0/650      | R01_cb11178_c2/flp0/650      | R01_cb11178_c2/flp0/650      | R01_cb11178_c2/flp0/650      | R01_cb11178_c2/flp0/650      |
| R01_cb8564_c120922/flp0/3037 | NA                           | R01_cb8564_c120922/flp0/3037 | NA                           | R01_cb8564_c120922/flp0/3037 |
| R01_cb7193_c1/flp0/2668      | NA                           | R01_cb7193_c1/flp0/2668      | NA                           | NA                           |
| R01_cb18653_c1/flp0/1682     | NA                           | R01_cb18653_c1/flp0/1682     | NA                           | R01_cb18653_c1/flp0/1682     |
| R01_cb4354_c11/flp0/3303     | NA                           | NA                           | NA                           | R01_cb4354_c11/flp0/3303     |
| R01_cb3584_c1/flp0/3586      | NA                           | R01_cb3584_c1/flp0/3586      | NA                           | R01_cb3584_c1/flp0/3586      |
| R01_cb6615_c6/flp0/2350      | NA                           | NA                           | R01_cb6615_c6/flp0/2350      | R01_cb6615_c6/flp0/2350      |
| R01_cb11523_c1/flp0/2651     | NA                           | R01_cb11523_c1/flp0/2651     | NA                           | NA                           |
| R01_cb17973_c35/flp0/681     | R01_cb17973_c35/flp0/681     | R01_cb17973_c35/flp0/681     | R01_cb17973_c35/flp0/681     | R01_cb17973_c35/flp0/681     |
| R01_cb12421_c25/flp0/581     | R01_cb12421_c25/flp0/581     | R01_cb12421_c25/flp0/581     | NA                           | NA                           |
| R01_cb8564_c124167/flp0/3100 | NA                           | R01_cb8564_c124167/flp0/3100 | NA                           | NA                           |
| R01_cb14107_c0/f6p0/1343     | NA                           | NA                           | R01_cb14107_c0/f6p0/1343     | R01_cb14107_c0/f6p0/1343     |
| R01_cb5706_c0/f2p1/2686      | NA                           | R01_cb5706_c0/f2p1/2686      | NA                           | NA                           |
| R01_cb7926_c2/flp0/2500      | R01_cb7926_c2/flp0/2500      | R01_cb7926_c2/flp0/2500      | NA                           | R01_cb7926_c2/flp0/2500      |
| R01_cb8564_c1832/flp0/2519   | R01_cb8564_c1832/flp0/2519   | R01_cb8564_c1832/flp0/2519   | R01_cb8564_c1832/flp0/2519   | R01_cb8564_c1832/flp0/2519   |
| R01_cb8564_c15411/flp0/3552  | NA                           | R01_cb8564_c15411/flp0/3552  | NA                           | NA                           |



|                                  |                          |                                  |                          |                            |
|----------------------------------|--------------------------|----------------------------------|--------------------------|----------------------------|
| R01_cb5297_c0/flp0/3126          | NA                       | R01_cb5297_c0/flp0/3126          | NA                       | NA                         |
| R01_cb4834_c48/flp0/984          | R01_cb4834_c48/flp0/984  | R01_cb4834_c48/flp0/984          | R01_cb4834_c48/flp0/984  | R01_cb4834_c48/flp0/984    |
| R01_cb15200_c5/flp0/954          | NA                       | R01_cb15200_c5/flp0/954          | NA                       | NA                         |
| R01_cb15487_c0/flp0/842          | NA                       | R01_cb15487_c0/flp0/842          | R01_cb15487_c0/flp0/842  | R01_cb15487_c0/flp0/842    |
| R01_cb8564_c112816/flp0/271<br>1 | NA                       | R01_cb8564_c112816/flp0/271<br>1 | NA                       | NA                         |
| R01_cb18456_c5284/flp0/1261      | NA                       | R01_cb18456_c5284/flp0/1261      | NA                       | NA                         |
| R01_cb8564_c78998/flp0/3377      | NA                       | R01_cb8564_c78998/flp0/3377      | NA                       | NA                         |
| R01_cb8564_c73321/flp0/4292      | NA                       | R01_cb8564_c73321/flp0/4292      | NA                       | NA                         |
| R01_cb4825_c13/flp0/4647         | NA                       | NA                               | NA                       | R01_cb4825_c13/flp0/4647   |
| R01_cb8564_c9925/f2p0/2973       | NA                       | NA                               | NA                       | R01_cb8564_c9925/f2p0/2973 |
| R01_cb14660_c9/flp0/1232         | NA                       | R01_cb14660_c9/flp0/1232         | NA                       | R01_cb14660_c9/flp0/1232   |
| R01_cb18456_c7139/flp0/806       | NA                       | R01_cb18456_c7139/flp0/806       | NA                       | NA                         |
| R01_cb17722_c1/flp0/343          | NA                       | R01_cb17722_c1/flp0/343          | NA                       | NA                         |
| R01_cb7828_c4/flp0/2108          | NA                       | NA                               | NA                       | R01_cb7828_c4/flp0/2108    |
| R01_cb10472_c2/flp0/1568         | R01_cb10472_c2/flp0/1568 | R01_cb10472_c2/flp0/1568         | R01_cb10472_c2/flp0/1568 | R01_cb10472_c2/flp0/1568   |
| R01_cb13884_c23/flp0/541         | R01_cb13884_c23/flp0/541 | NA                               | R01_cb13884_c23/flp0/541 | R01_cb13884_c23/flp0/541   |
| R01_cb8564_c39189/flp1/2975      | NA                       | R01_cb8564_c39189/flp1/2975      | NA                       | NA                         |
| R01_cb6147_c10/flp0/3193         | NA                       | R01_cb6147_c10/flp0/3193         | NA                       | NA                         |
| R01_cb13686_c5/f2p1/1612         | NA                       | R01_cb13686_c5/f2p1/1612         | NA                       | NA                         |
| R01_cb7731_c15/flp0/2544         | NA                       | NA                               | NA                       | R01_cb7731_c15/flp0/2544   |
| R01_cb10936_c4/flp0/1784         | NA                       | NA                               | NA                       | R01_cb10936_c4/flp0/1784   |
| R01_cb5448_c2/flp0/3092          | NA                       | R01_cb5448_c2/flp0/3092          | NA                       | NA                         |
| R01_cb7051_c0/flp0/2666          | NA                       | NA                               | NA                       | R01_cb7051_c0/flp0/2666    |
| R01_cb15710_c4/flp0/800          | NA                       | R01_cb15710_c4/flp0/800          | NA                       | NA                         |
| R01_cb3339_c10/flp0/1322         | NA                       | NA                               | NA                       | R01_cb3339_c10/flp0/1322   |

|                             |                             |                             |                             |                             |
|-----------------------------|-----------------------------|-----------------------------|-----------------------------|-----------------------------|
| R01_cb4128_c19/f1p0/2260    | NA                          | NA                          | NA                          | R01_cb4128_c19/f1p0/2260    |
| R01_cb3426_c22/f1p0/3122    | NA                          | NA                          | NA                          | R01_cb3426_c22/f1p0/3122    |
| R01_cb17939_c0/f2p0/473     | R01_cb17939_c0/f2p0/473     | R01_cb17939_c0/f2p0/473     | NA                          | R01_cb17939_c0/f2p0/473     |
| R01_cb5324_c0/f1p0/3110     | R01_cb5324_c0/f1p0/3110     | R01_cb5324_c0/f1p0/3110     | R01_cb5324_c0/f1p0/3110     | R01_cb5324_c0/f1p0/3110     |
| R01_cb8564_c83579/f1p0/1981 | NA                          | R01_cb8564_c83579/f1p0/1981 | R01_cb8564_c83579/f1p0/1981 | R01_cb8564_c83579/f1p0/1981 |
| R01_cb10310_c0/f1p0/2004    | NA                          | NA                          | NA                          | R01_cb10310_c0/f1p0/2004    |
| R01_cb2164_c8/f1p0/2033     | NA                          | R01_cb2164_c8/f1p0/2033     | NA                          | R01_cb2164_c8/f1p0/2033     |
| R01_cb8564_c1854/f1p0/3435  | NA                          | R01_cb8564_c1854/f1p0/3435  | R01_cb8564_c1854/f1p0/3435  | R01_cb8564_c1854/f1p0/3435  |
| R01_cb17756_c3/f2p0/476     | R01_cb17756_c3/f2p0/476     | R01_cb17756_c3/f2p0/476     | R01_cb17756_c3/f2p0/476     | R01_cb17756_c3/f2p0/476     |
| R01_cb18456_c1700/f2p0/341  | R01_cb18456_c1700/f2p0/341  | R01_cb18456_c1700/f2p0/341  | R01_cb18456_c1700/f2p0/341  | R01_cb18456_c1700/f2p0/341  |
| R01_cb4347_c5/f1p0/607      | NA                          | R01_cb4347_c5/f1p0/607      | R01_cb4347_c5/f1p0/607      | NA                          |
| R01_cb13493_c1/f1p0/1366    | NA                          | R01_cb13493_c1/f1p0/1366    | NA                          | NA                          |
| R01_cb12603_c13/f1p0/914    | NA                          | NA                          | R01_cb12603_c13/f1p0/914    | R01_cb12603_c13/f1p0/914    |
| R01_cb16980_c3/f2p0/1124    | NA                          | NA                          | NA                          | R01_cb16980_c3/f2p0/1124    |
| R01_cb17869_c2/f1p1/1777    | NA                          | NA                          | NA                          | R01_cb17869_c2/f1p1/1777    |
| R01_cb8564_c70122/f1p0/2814 | NA                          | R01_cb8564_c70122/f1p0/2814 | NA                          | NA                          |
| R01_cb16774_c7/f1p0/1053    | NA                          | R01_cb16774_c7/f1p0/1053    | NA                          | NA                          |
| R01_cb17717_c0/f1p0/959     | NA                          | NA                          | R01_cb17717_c0/f1p0/959     | R01_cb17717_c0/f1p0/959     |
| R01_cb15136_c2/f1p0/612     | NA                          | R01_cb15136_c2/f1p0/612     | R01_cb15136_c2/f1p0/612     | R01_cb15136_c2/f1p0/612     |
| R01_cb8564_c126285/f1p0/241 | R01_cb8564_c126285/f1p0/241 | R01_cb8564_c126285/f1p0/241 | R01_cb8564_c126285/f1p0/241 | R01_cb8564_c126285/f1p0/241 |
| 2                           | 12                          | 2                           | 2                           | 2                           |
| R01_cb17336_c0/f1p0/655     | NA                          | R01_cb17336_c0/f1p0/655     | R01_cb17336_c0/f1p0/655     | R01_cb17336_c0/f1p0/655     |
| R01_cb15796_c6/f1p0/1301    | NA                          | NA                          | NA                          | R01_cb15796_c6/f1p0/1301    |
| R01_cb5246_c6/f1p0/799      | NA                          | R01_cb5246_c6/f1p0/799      | R01_cb5246_c6/f1p0/799      | R01_cb5246_c6/f1p0/799      |
| R01_cb646_c3/f1p0/4014      | NA                          | NA                          | NA                          | R01_cb646_c3/f1p0/4014      |
| R01_cb15495_c2/f1p0/466     | R01_cb15495_c2/f1p0/466     | R01_cb15495_c2/f1p0/466     | R01_cb15495_c2/f1p0/466     | NA                          |

|                             |                            |                             |                            |                            |
|-----------------------------|----------------------------|-----------------------------|----------------------------|----------------------------|
| R01_cb17187_c0/fl2p0/601    | R01_cb17187_c0/fl2p0/601   | NA                          | NA                         | NA                         |
| R01_cb8564_c76556/flp0/2353 | NA                         | R01_cb8564_c76556/flp0/2353 | NA                         | NA                         |
| R01_cb13118_c0/flp0/942     | NA                         | NA                          | NA                         | R01_cb13118_c0/flp0/942    |
| R01_cb6719_c80/flp0/2471    | NA                         | R01_cb6719_c80/flp0/2471    | NA                         | NA                         |
| R01_cb16125_c7/flp0/1621    | NA                         | NA                          | NA                         | R01_cb16125_c7/flp0/1621   |
| R01_cb4744_c3/flp0/2848     | NA                         | R01_cb4744_c3/flp0/2848     | R01_cb4744_c3/flp0/2848    | R01_cb4744_c3/flp0/2848    |
| R01_cb18456_c7435/flp0/649  | R01_cb18456_c7435/flp0/649 | R01_cb18456_c7435/flp0/649  | R01_cb18456_c7435/flp0/649 | R01_cb18456_c7435/flp0/649 |
| R01_cb1437_c7/flp0/3821     | NA                         | NA                          | NA                         | R01_cb1437_c7/flp0/3821    |
| R01_cb15100_c0/f6p0/793     | NA                         | NA                          | NA                         | R01_cb15100_c0/f6p0/793    |
| R01_cb18166_c0/flp0/426     | NA                         | R01_cb18166_c0/flp0/426     | NA                         | NA                         |
| R01_cb6424_c3/flp0/2553     | NA                         | R01_cb6424_c3/flp0/2553     | NA                         | NA                         |
| R01_cb9179_c1/flp0/2156     | NA                         | R01_cb9179_c1/flp0/2156     | NA                         | R01_cb9179_c1/flp0/2156    |
| R01_cb13405_c3/flp0/732     | NA                         | NA                          | NA                         | R01_cb13405_c3/flp0/732    |
| R01_cb9232_c5/flp0/371      | NA                         | R01_cb9232_c5/flp0/371      | R01_cb9232_c5/flp0/371     | R01_cb9232_c5/flp0/371     |
| R01_cb15789_c1/flp0/284     | R01_cb15789_c1/flp0/284    | R01_cb15789_c1/flp0/284     | R01_cb15789_c1/flp0/284    | R01_cb15789_c1/flp0/284    |
| R01_cb2494_c5/flp0/3920     | NA                         | R01_cb2494_c5/flp0/3920     | NA                         | NA                         |
| R01_cb16662_c7/f4p0/521     | R01_cb16662_c7/f4p0/521    | R01_cb16662_c7/f4p0/521     | R01_cb16662_c7/f4p0/521    | R01_cb16662_c7/f4p0/521    |
| R01_cb7133_c1/flp0/2694     | R01_cb7133_c1/flp0/2694    | R01_cb7133_c1/flp0/2694     | NA                         | NA                         |
| R01_cb11701_c0/flp0/783     | NA                         | NA                          | NA                         | R01_cb11701_c0/flp0/783    |
| R01_cb6547_c2/f2p1/2686     | NA                         | NA                          | NA                         | R01_cb6547_c2/f2p1/2686    |
| R01_cb13445_c2/flp0/665     | R01_cb13445_c2/flp0/665    | R01_cb13445_c2/flp0/665     | NA                         | NA                         |
| R01_cb11075_c0/flp0/699     | NA                         | R01_cb11075_c0/flp0/699     | NA                         | NA                         |
| R01_cb3359_c15/flp0/3164    | NA                         | R01_cb3359_c15/flp0/3164    | NA                         | NA                         |
| R01_cb6240_c6/flp1/2905     | NA                         | R01_cb6240_c6/flp1/2905     | NA                         | NA                         |
| R01_cb6631_c25/flp0/1946    | NA                         | NA                          | NA                         | R01_cb6631_c25/flp0/1946   |
| R01_cb18456_c5376/flp0/1429 | NA                         | R01_cb18456_c5376/flp0/1429 | NA                         | NA                         |

|                             |                                  |                             |                             |                             |
|-----------------------------|----------------------------------|-----------------------------|-----------------------------|-----------------------------|
| R01_cb8564_c10187/flp0/2124 | R01_cb8564_c10187/flp0/2124<br>4 | R01_cb8564_c10187/flp0/2124 | R01_cb8564_c10187/flp0/2124 | R01_cb8564_c10187/flp0/2124 |
| R01_cb11099_c1/flp0/2096    | NA                               | NA                          | NA                          | R01_cb11099_c1/flp0/2096    |
| R01_cb4805_c25/flp0/1488    | NA                               | R01_cb4805_c25/flp0/1488    | NA                          | R01_cb4805_c25/flp0/1488    |
| R01_cb10121_c0/f5p0/754     | NA                               | R01_cb10121_c0/f5p0/754     | NA                          | R01_cb10121_c0/f5p0/754     |
| R01_cb11480_c0/flp0/1304    | R01_cb11480_c0/flp0/1304         | R01_cb11480_c0/flp0/1304    | R01_cb11480_c0/flp0/1304    | R01_cb11480_c0/flp0/1304    |
| R01_cb13880_c2/flp0/1819    | NA                               | R01_cb13880_c2/flp0/1819    | R01_cb13880_c2/flp0/1819    | NA                          |
| R01_cb8564_c70540/flp0/4401 | NA                               | R01_cb8564_c70540/flp0/4401 | NA                          | R01_cb8564_c70540/flp0/4401 |
| R01_cb17268_c2/flp0/500     | NA                               | R01_cb17268_c2/flp0/500     | NA                          | NA                          |
| R01_cb1487_c1/flp0/3827     | NA                               | NA                          | NA                          | R01_cb1487_c1/flp0/3827     |
| R01_cb16005_c1/f2p0/630     | NA                               | R01_cb16005_c1/f2p0/630     | NA                          | NA                          |
| R01_cb4989_c52/flp2/1036    | R01_cb4989_c52/flp2/1036         | R01_cb4989_c52/flp2/1036    | NA                          | R01_cb4989_c52/flp2/1036    |
| R01_cb18456_c5325/flp4/800  | NA                               | R01_cb18456_c5325/flp4/800  | NA                          | NA                          |
| R01_cb1706_c4/flp0/3976     | NA                               | NA                          | NA                          | R01_cb1706_c4/flp0/3976     |
| R01_cb6802_c41/flp0/3431    | NA                               | R01_cb6802_c41/flp0/3431    | NA                          | NA                          |
| R01_cb1554_c6/flp0/1460     | NA                               | NA                          | NA                          | R01_cb1554_c6/flp0/1460     |
| R01_cb5900_c99/flp0/3038    | NA                               | R01_cb5900_c99/flp0/3038    | NA                          | NA                          |
| R01_cb18456_c7323/flp0/752  | NA                               | R01_cb18456_c7323/flp0/752  | NA                          | NA                          |
| R01_cb4233_c203/flp0/2028   | NA                               | NA                          | NA                          | R01_cb4233_c203/flp0/2028   |
| R01_cb3426_c12/flp1/3048    | NA                               | NA                          | NA                          | R01_cb3426_c12/flp1/3048    |
| R01_cb1849_c14/flp1/1916    | NA                               | NA                          | NA                          | R01_cb1849_c14/flp1/1916    |
| R01_cb261_c43/flp0/2533     | NA                               | NA                          | NA                          | R01_cb261_c43/flp0/2533     |
| R01_cb6443_c1/flp0/2958     | R01_cb6443_c1/flp0/2958          | R01_cb6443_c1/flp0/2958     | R01_cb6443_c1/flp0/2958     | R01_cb6443_c1/flp0/2958     |
| R01_cb18301_c2/f2p0/1752    | NA                               | NA                          | NA                          | R01_cb18301_c2/f2p0/1752    |
| R01_cb16981_c11/flp2/746    | NA                               | NA                          | NA                          | R01_cb16981_c11/flp2/746    |
| R01_cb8564_c2989/flp0/2431  | NA                               | R01_cb8564_c2989/flp0/2431  | R01_cb8564_c2989/flp0/2431  | R01_cb8564_c2989/flp0/2431  |

|                             |                             |                             |                             |                             |
|-----------------------------|-----------------------------|-----------------------------|-----------------------------|-----------------------------|
| R01_cb15085_c4/flp0/636     | NA                          | R01_cb15085_c4/flp0/636     | NA                          | NA                          |
| R01_cb15844_c0/flp0/682     | R01_cb15844_c0/flp0/682     | R01_cb15844_c0/flp0/682     | R01_cb15844_c0/flp0/682     | R01_cb15844_c0/flp0/682     |
| R01_cb11453_c0/f5p0/987     | NA                          | NA                          | NA                          | R01_cb11453_c0/f5p0/987     |
| R01_cb4582_c2/flp0/3375     | NA                          | R01_cb4582_c2/flp0/3375     | NA                          | NA                          |
| R01_cb1969_c3/flp0/3150     | NA                          | R01_cb1969_c3/flp0/3150     | R01_cb1969_c3/flp0/3150     | NA                          |
| R01_cb6802_c38/flp0/2886    | NA                          | R01_cb6802_c38/flp0/2886    | NA                          | NA                          |
| R01_cb12311_c1/flp0/1218    | R01_cb12311_c1/flp0/1218    | R01_cb12311_c1/flp0/1218    | NA                          | R01_cb12311_c1/flp0/1218    |
| R01_cb8546_c1/f2p0/1736     | NA                          | NA                          | NA                          | R01_cb8546_c1/f2p0/1736     |
| R01_cb882_c7/flp0/1215      | NA                          | NA                          | NA                          | R01_cb882_c7/flp0/1215      |
| R01_cb10556_c9/flp0/1619    | NA                          | NA                          | NA                          | R01_cb10556_c9/flp0/1619    |
| R01_cb302_c6/flp0/3162      | NA                          | NA                          | NA                          | R01_cb302_c6/flp0/3162      |
| R01_cb11808_c0/flp1/1464    | NA                          | NA                          | NA                          | R01_cb11808_c0/flp1/1464    |
| R01_cb6309_c3/flp0/2749     | NA                          | R01_cb6309_c3/flp0/2749     | NA                          | NA                          |
| R01_cb6406_c50/flp0/2717    | NA                          | R01_cb6406_c50/flp0/2717    | NA                          | R01_cb6406_c50/flp0/2717    |
| R01_cb8564_c77232/flp0/2806 | NA                          | NA                          | NA                          | R01_cb8564_c77232/flp0/2806 |
| R01_cb8564_c23387/flp0/2531 | NA                          | NA                          | NA                          | R01_cb8564_c23387/flp0/2531 |
| R01_cb8564_c34119/f4p0/3135 | NA                          | R01_cb8564_c34119/f4p0/3135 | R01_cb8564_c34119/f4p0/3135 | R01_cb8564_c34119/f4p0/3135 |
| R01_cb8977_c7/flp0/1977     | NA                          | R01_cb8977_c7/flp0/1977     | NA                          | R01_cb8977_c7/flp0/1977     |
| R01_cb8564_c23605/flp3/4219 | NA                          | R01_cb8564_c23605/flp3/4219 | R01_cb8564_c23605/flp3/4219 | R01_cb8564_c23605/flp3/4219 |
| R01_cb10964_c1/flp0/3951    | R01_cb10964_c1/flp0/3951    | R01_cb10964_c1/flp0/3951    | NA                          | R01_cb10964_c1/flp0/3951    |
| R01_cb8564_c15505/flp1/2740 | R01_cb8564_c15505/flp1/2740 | NA                          | R01_cb8564_c15505/flp1/2740 | R01_cb8564_c15505/flp1/2740 |
| R01_cb9448_c6/flp1/2077     | NA                          | NA                          | NA                          | R01_cb9448_c6/flp1/2077     |
| R01_cb8564_c13587/flp1/2298 | NA                          | NA                          | NA                          | R01_cb8564_c13587/flp1/2298 |
| R01_cb1248_c9/flp0/6348     | NA                          | NA                          | NA                          | R01_cb1248_c9/flp0/6348     |
| R01_cb13118_c3/flp0/1964    | NA                          | R01_cb13118_c3/flp0/1964    | NA                          | NA                          |

|                             |                             |                             |                             |                             |
|-----------------------------|-----------------------------|-----------------------------|-----------------------------|-----------------------------|
| R01_cb16926_c4/flp0/1767    | NA                          | R01_cb16926_c4/flp0/1767    | NA                          | NA                          |
| R01_cb14401_c0/f4p0/506     | NA                          | R01_cb14401_c0/f4p0/506     | NA                          | NA                          |
| R01_cb13686_c15/flp1/1835   | NA                          | R01_cb13686_c15/flp1/1835   | NA                          | NA                          |
| R01_cb7230_c7/flp0/1948     | NA                          | R01_cb7230_c7/flp0/1948     | NA                          | NA                          |
| R01_cb18456_c7593/flp0/770  | R01_cb18456_c7593/flp0/770  | R01_cb18456_c7593/flp0/770  | NA                          | R01_cb18456_c7593/flp0/770  |
| R01_cb8564_c1892/flp0/2987  | NA                          | NA                          | NA                          | R01_cb8564_c1892/flp0/2987  |
| R01_cb10623_c1/f2p0/546     | NA                          | R01_cb10623_c1/f2p0/546     | R01_cb10623_c1/f2p0/546     | NA                          |
| R01_cb2845_c21/flp0/3681    | NA                          | NA                          | NA                          | R01_cb2845_c21/flp0/3681    |
| R01_cb8564_c129610/flp0/238 | R01_cb8564_c129610/flp0/238 | R01_cb8564_c129610/flp0/238 | R01_cb8564_c129610/flp0/238 | R01_cb8564_c129610/flp0/238 |
| 6                           | 86                          | 6                           | 6                           | 6                           |
| R01_cb18445_c0/flp0/942     | NA                          | R01_cb18445_c0/flp0/942     | R01_cb18445_c0/flp0/942     | R01_cb18445_c0/flp0/942     |
| R01_cb8564_c77520/flp0/3886 | NA                          | R01_cb8564_c77520/flp0/3886 | NA                          | NA                          |
| R01_cb5769_c2/flp0/3018     | NA                          | R01_cb5769_c2/flp0/3018     | NA                          | NA                          |
| R01_cb3500_c28/flp0/2679    | NA                          | NA                          | NA                          | R01_cb3500_c28/flp0/2679    |
| R01_cb13910_c24/flp0/1099   | R01_cb13910_c24/flp0/1099   | R01_cb13910_c24/flp0/1099   | R01_cb13910_c24/flp0/1099   | R01_cb13910_c24/flp0/1099   |
| R01_cb9951_c1/flp0/2059     | NA                          | R01_cb9951_c1/flp0/2059     | NA                          | NA                          |
| R01_cb18456_c1834/flp0/359  | R01_cb18456_c1834/flp0/359  | R01_cb18456_c1834/flp0/359  | R01_cb18456_c1834/flp0/359  | R01_cb18456_c1834/flp0/359  |
| R01_cb8564_c25146/flp0/3529 | NA                          | R01_cb8564_c25146/flp0/3529 | R01_cb8564_c25146/flp0/3529 | R01_cb8564_c25146/flp0/3529 |
| R01_cb16153_c6/flp0/1191    | R01_cb16153_c6/flp0/1191    | R01_cb16153_c6/flp0/1191    | R01_cb16153_c6/flp0/1191    | R01_cb16153_c6/flp0/1191    |
| R01_cb14107_c3/flp0/1338    | NA                          | NA                          | R01_cb14107_c3/flp0/1338    | R01_cb14107_c3/flp0/1338    |
| R01_cb8975_c9/flp0/1783     | NA                          | NA                          | NA                          | R01_cb8975_c9/flp0/1783     |
| R01_cb3756_c23/flp0/1356    | NA                          | R01_cb3756_c23/flp0/1356    | R01_cb3756_c23/flp0/1356    | R01_cb3756_c23/flp0/1356    |
| R01_cb7023_c3/flp1/2449     | NA                          | R01_cb7023_c3/flp1/2449     | R01_cb7023_c3/flp1/2449     | R01_cb7023_c3/flp1/2449     |
| R01_cb10034_c53/f2p1/549    | NA                          | R01_cb10034_c53/f2p1/549    | NA                          | NA                          |
| R01_cb18699_c0/flp0/6015    | R01_cb18699_c0/flp0/6015    | R01_cb18699_c0/flp0/6015    | NA                          | NA                          |
| R01_cb10679_c3/f6p0/486     | NA                          | NA                          | NA                          | R01_cb10679_c3/f6p0/486     |

|                                  |                                 |                                  |                             |                                  |
|----------------------------------|---------------------------------|----------------------------------|-----------------------------|----------------------------------|
| R01_cb13762_c8/flp0/1530         | NA                              | R01_cb13762_c8/flp0/1530         | NA                          | NA                               |
| R01_cb8564_c115588/flp0/213<br>2 | NA                              | R01_cb8564_c115588/flp0/213<br>2 | NA                          | R01_cb8564_c115588/flp0/213<br>2 |
| R01_cb18086_c1/flp0/513          | NA                              | R01_cb18086_c1/flp0/513          | NA                          | R01_cb18086_c1/flp0/513          |
| R01_cb8564_c2629/flp2/2078       | NA                              | R01_cb8564_c2629/flp2/2078       | NA                          | NA                               |
| R01_cb18456_c5168/flp0/856       | R01_cb18456_c5168/flp0/856      | R01_cb18456_c5168/flp0/856       | NA                          | R01_cb18456_c5168/flp0/856       |
| R01_cb12785_c9/flp1/1033         | NA                              | NA                               | R01_cb12785_c9/flp1/1033    | NA                               |
| R01_cb13026_c1/f2p0/452          | R01_cb13026_c1/f2p0/452         | R01_cb13026_c1/f2p0/452          | R01_cb13026_c1/f2p0/452     | R01_cb13026_c1/f2p0/452          |
| R01_cb1077_c10/flp0/3011         | NA                              | R01_cb1077_c10/flp0/3011         | NA                          | NA                               |
| R01_cb18313_c1/flp0/898          | NA                              | NA                               | NA                          | R01_cb18313_c1/flp0/898          |
| R01_cb18062_c2/flp0/734          | R01_cb18062_c2/flp0/734         | R01_cb18062_c2/flp0/734          | R01_cb18062_c2/flp0/734     | R01_cb18062_c2/flp0/734          |
| R01_cb8564_c76220/flp0/2932      | NA                              | R01_cb8564_c76220/flp0/2932      | R01_cb8564_c76220/flp0/2932 | NA                               |
| R01_cb7243_c1/flp0/2653          | NA                              | NA                               | NA                          | R01_cb7243_c1/flp0/2653          |
| R01_cb8564_c988/flp0/2635        | NA                              | R01_cb8564_c988/flp0/2635        | R01_cb8564_c988/flp0/2635   | R01_cb8564_c988/flp0/2635        |
| R01_cb8564_c85777/flp0/2224<br>4 | R01_cb8564_c85777/flp0/222<br>4 | NA                               | R01_cb8564_c85777/flp0/2224 | R01_cb8564_c85777/flp0/2224      |
| R01_cb4657_c29/flp0/2319         | NA                              | R01_cb4657_c29/flp0/2319         | R01_cb4657_c29/flp0/2319    | NA                               |
| R01_cb12024_c6/flp0/959          | NA                              | NA                               | NA                          | R01_cb12024_c6/flp0/959          |
| R01_cb11075_c1/flp0/3494         | NA                              | R01_cb11075_c1/flp0/3494         | NA                          | NA                               |
| R01_cb6507_c4/flp0/2292          | NA                              | NA                               | R01_cb6507_c4/flp0/2292     | R01_cb6507_c4/flp0/2292          |
| R01_cb10359_c2/flp0/2675         | NA                              | NA                               | NA                          | R01_cb10359_c2/flp0/2675         |
| R01_cb5896_c140/flp0/2367        | NA                              | R01_cb5896_c140/flp0/2367        | NA                          | R01_cb5896_c140/flp0/2367        |
| R01_cb15313_c1/flp0/1841         | NA                              | NA                               | R01_cb15313_c1/flp0/1841    | R01_cb15313_c1/flp0/1841         |
| R01_cb3324_c5/flp0/2017          | NA                              | R01_cb3324_c5/flp0/2017          | NA                          | R01_cb3324_c5/flp0/2017          |
| R01_cb13427_c5/flp0/712          | NA                              | NA                               | R01_cb13427_c5/flp0/712     | R01_cb13427_c5/flp0/712          |
| R01_cb4657_c14/flp0/3546         | NA                              | NA                               | NA                          | R01_cb4657_c14/flp0/3546         |

|                              |                          |                              |                          |                              |
|------------------------------|--------------------------|------------------------------|--------------------------|------------------------------|
| R01_cb9552_c2/f1p0/2047      | NA                       | NA                           | NA                       | R01_cb9552_c2/f1p0/2047      |
| R01_cb13027_c0/f2p0/1040     | NA                       | NA                           | NA                       | R01_cb13027_c0/f2p0/1040     |
| R01_cb16926_c2/f1p0/1100     | NA                       | R01_cb16926_c2/f1p0/1100     | NA                       | NA                           |
| R01_cb10927_c1/f1p0/2928     | NA                       | R01_cb10927_c1/f1p0/2928     | NA                       | NA                           |
| R01_cb5929_c6/f1p1/2534      | NA                       | NA                           | NA                       | R01_cb5929_c6/f1p1/2534      |
| R01_cb5139_c7/f1p1/2751      | NA                       | NA                           | NA                       | R01_cb5139_c7/f1p1/2751      |
| R01_cb16426_c1/f1p0/1401     | NA                       | R01_cb16426_c1/f1p0/1401     | NA                       | NA                           |
| R01_cb3492_c2/f1p0/3445      | NA                       | R01_cb3492_c2/f1p0/3445      | NA                       | NA                           |
| R01_cb8564_c89458/f2p0/3479  | NA                       | R01_cb8564_c89458/f2p0/3479  | NA                       | NA                           |
| R01_cb10413_c1/f1p0/2321     | R01_cb10413_c1/f1p0/2321 | R01_cb10413_c1/f1p0/2321     | R01_cb10413_c1/f1p0/2321 | R01_cb10413_c1/f1p0/2321     |
| R01_cb8564_c1078/f1p0/2012   | NA                       | NA                           | NA                       | R01_cb8564_c1078/f1p0/2012   |
| R01_cb18535_c1/f1p0/807      | NA                       | R01_cb18535_c1/f1p0/807      | NA                       | R01_cb18535_c1/f1p0/807      |
| R01_cb18192_c5/f1p0/1798     | R01_cb18192_c5/f1p0/1798 | R01_cb18192_c5/f1p0/1798     | R01_cb18192_c5/f1p0/1798 | R01_cb18192_c5/f1p0/1798     |
| R01_cb1894_c2/f1p0/4133      | NA                       | R01_cb1894_c2/f1p0/4133      | NA                       | R01_cb1894_c2/f1p0/4133      |
| R01_cb12873_c2/f1p0/811      | NA                       | R01_cb12873_c2/f1p0/811      | NA                       | NA                           |
| R01_cb16984_c1/f1p0/1248     | NA                       | NA                           | NA                       | R01_cb16984_c1/f1p0/1248     |
| R01_cb9699_c0/f2p0/2010      | NA                       | NA                           | NA                       | R01_cb9699_c0/f2p0/2010      |
| R01_cb1078_c7/f1p0/3914      | NA                       | NA                           | NA                       | R01_cb1078_c7/f1p0/3914      |
| R01_cb8564_c110588/f1p0/1905 | NA                       | NA                           | NA                       | R01_cb8564_c110588/f1p0/1905 |
| R01_cb2095_c4/f2p2/2126      | NA                       | NA                           | NA                       | R01_cb2095_c4/f2p2/2126      |
| R01_cb8564_c128659/f1p0/1925 | NA                       | R01_cb8564_c128659/f1p0/1925 | NA                       | R01_cb8564_c128659/f1p0/1925 |
| R01_cb1905_c5/f2p0/3069      | NA                       | R01_cb1905_c5/f2p0/3069      | R01_cb1905_c5/f2p0/3069  | R01_cb1905_c5/f2p0/3069      |
| R01_cb11802_c1/f1p0/2381     | R01_cb11802_c1/f1p0/2381 | R01_cb11802_c1/f1p0/2381     | NA                       | R01_cb11802_c1/f1p0/2381     |
| R01_cb7141_c1/f1p0/2689      | NA                       | R01_cb7141_c1/f1p0/2689      | NA                       | R01_cb7141_c1/f1p0/2689      |



|                              |                         |                              |                            |                              |
|------------------------------|-------------------------|------------------------------|----------------------------|------------------------------|
| R01_cb5208_c9/flp1/2940      | NA                      | NA                           | NA                         | R01_cb5208_c9/flp1/2940      |
| R01_cb2807_c4/flp0/1596      | NA                      | NA                           | R01_cb2807_c4/flp0/1596    | R01_cb2807_c4/flp0/1596      |
| R01_cb18456_c7783/f3p3/694   | NA                      | R01_cb18456_c7783/f3p3/694   | R01_cb18456_c7783/f3p3/694 | R01_cb18456_c7783/f3p3/694   |
| R01_cb1134_c4/flp0/1917      | NA                      | NA                           | NA                         | R01_cb1134_c4/flp0/1917      |
| R01_cb12505_c4/flp0/1745     | NA                      | R01_cb12505_c4/flp0/1745     | NA                         | NA                           |
| R01_cb8564_c126074/flp0/2700 | NA                      | NA                           | NA                         | R01_cb8564_c126074/flp0/2700 |
| R01_cb7137_c1/flp0/2652      | NA                      | R01_cb7137_c1/flp0/2652      | R01_cb7137_c1/flp0/2652    | NA                           |
| R01_cb8564_c17390/flp0/2016  | NA                      | NA                           | NA                         | R01_cb8564_c17390/flp0/2016  |
| R01_cb16133_c4/flp0/837      | NA                      | R01_cb16133_c4/flp0/837      | NA                         | R01_cb16133_c4/flp0/837      |
| R01_cb9882_c8/flp0/835       | R01_cb9882_c8/flp0/835  | R01_cb9882_c8/flp0/835       | R01_cb9882_c8/flp0/835     | NA                           |
| R01_cb15208_c7/flp0/422      | R01_cb15208_c7/flp0/422 | R01_cb15208_c7/flp0/422      | NA                         | R01_cb15208_c7/flp0/422      |
| R01_cb7570_c1/flp0/2371      | NA                      | R01_cb7570_c1/flp0/2371      | NA                         | NA                           |
| R01_cb8564_c125535/flp0/2294 | NA                      | R01_cb8564_c125535/flp0/2294 | NA                         | R01_cb8564_c125535/flp0/2294 |
| R01_cb11746_c0/flp0/1494     | NA                      | NA                           | NA                         | R01_cb11746_c0/flp0/1494     |
| R01_cb8564_c76784/flp0/2432  | NA                      | R01_cb8564_c76784/flp0/2432  | NA                         | NA                           |
| R01_cb6819_c2/flp0/3315      | NA                      | NA                           | NA                         | R01_cb6819_c2/flp0/3315      |
| R01_cb8564_c4869/flp0/3091   | NA                      | NA                           | NA                         | R01_cb8564_c4869/flp0/3091   |
| R01_cb8564_c15921/flp11/1869 | NA                      | R01_cb8564_c15921/flp11/1869 | NA                         | NA                           |
| R01_cb16888_c8/flp0/862      | NA                      | NA                           | R01_cb16888_c8/flp0/862    | R01_cb16888_c8/flp0/862      |
| R01_cb11007_c4/f2p0/633      | NA                      | R01_cb11007_c4/f2p0/633      | NA                         | R01_cb11007_c4/f2p0/633      |
| R01_cb10830_c2/flp0/1276     | NA                      | NA                           | NA                         | R01_cb10830_c2/flp0/1276     |
| R01_cb8564_c73982/flp0/2430  | NA                      | NA                           | NA                         | R01_cb8564_c73982/flp0/2430  |
| R01_cb18622_c2/flp0/748      | NA                      | R01_cb18622_c2/flp0/748      | NA                         | R01_cb18622_c2/flp0/748      |

|                             |                             |                             |                          |                             |
|-----------------------------|-----------------------------|-----------------------------|--------------------------|-----------------------------|
| R01_cb18690_c1/flp1/483     | R01_cb18690_c1/flp1/483     | R01_cb18690_c1/flp1/483     | R01_cb18690_c1/flp1/483  | R01_cb18690_c1/flp1/483     |
| R01_cb8266_c4/flp0/1755     | NA                          | R01_cb8266_c4/flp0/1755     | NA                       | R01_cb8266_c4/flp0/1755     |
| R01_cb18676_c5/flp0/1059    | NA                          | R01_cb18676_c5/flp0/1059    | R01_cb18676_c5/flp0/1059 | R01_cb18676_c5/flp0/1059    |
| R01_cb8564_c87901/flp0/3281 | NA                          | R01_cb8564_c87901/flp0/3281 | NA                       | NA                          |
| R01_cb7367_c5/flp1/2604     | NA                          | NA                          | NA                       | R01_cb7367_c5/flp1/2604     |
| R01_cb4269_c10/flp0/1931    | NA                          | NA                          | NA                       | R01_cb4269_c10/flp0/1931    |
| R01_cb3929_c8/flp0/4508     | NA                          | R01_cb3929_c8/flp0/4508     | R01_cb3929_c8/flp0/4508  | NA                          |
| R01_cb12039_c1/f2p0/370     | NA                          | R01_cb12039_c1/f2p0/370     | R01_cb12039_c1/f2p0/370  | R01_cb12039_c1/f2p0/370     |
| R01_cb8564_c77450/flp0/2895 | NA                          | R01_cb8564_c77450/flp0/2895 | NA                       | NA                          |
| R01_cb14783_c0/flp0/703     | NA                          | R01_cb14783_c0/flp0/703     | R01_cb14783_c0/flp0/703  | R01_cb14783_c0/flp0/703     |
| R01_cb10029_c724/flp0/699   | NA                          | R01_cb10029_c724/flp0/699   | NA                       | NA                          |
| R01_cb10049_c0/flp0/1662    | R01_cb10049_c0/flp0/1662    | R01_cb10049_c0/flp0/1662    | R01_cb10049_c0/flp0/1662 | R01_cb10049_c0/flp0/1662    |
| R01_cb10726_c1/flp0/2117    | R01_cb10726_c1/flp0/2117    | R01_cb10726_c1/flp0/2117    | NA                       | NA                          |
| R01_cb9723_c0/f3p0/1581     | NA                          | NA                          | NA                       | R01_cb9723_c0/f3p0/1581     |
| R01_cb8279_c4/flp0/4395     | NA                          | NA                          | NA                       | R01_cb8279_c4/flp0/4395     |
| R01_cb1119_c3/flp1/4475     | NA                          | R01_cb1119_c3/flp1/4475     | R01_cb1119_c3/flp1/4475  | NA                          |
| R01_cb3218_c5/flp0/2663     | NA                          | NA                          | NA                       | R01_cb3218_c5/flp0/2663     |
| R01_cb5758_c2/flp0/2177     | R01_cb5758_c2/flp0/2177     | R01_cb5758_c2/flp0/2177     | R01_cb5758_c2/flp0/2177  | R01_cb5758_c2/flp0/2177     |
| R01_cb8564_c122060/flp0/330 | R01_cb8564_c122060/flp0/330 | NA                          | NA                       | R01_cb8564_c122060/flp0/330 |
| R01_cb8564_c84907/flp0/3145 | R01_cb8564_c84907/flp0/3145 | R01_cb8564_c84907/flp0/3145 | NA                       | NA                          |
| R01_cb3941_c90/flp0/4349    | NA                          | R01_cb3941_c90/flp0/4349    | NA                       | NA                          |
| R01_cb3578_c6/flp0/745      | R01_cb3578_c6/flp0/745      | R01_cb3578_c6/flp0/745      | R01_cb3578_c6/flp0/745   | R01_cb3578_c6/flp0/745      |
| R01_cb4328_c8/flp0/2449     | NA                          | R01_cb4328_c8/flp0/2449     | NA                       | NA                          |
| R01_cb8564_c20162/flp0/3449 | NA                          | R01_cb8564_c20162/flp0/3449 | NA                       | R01_cb8564_c20162/flp0/3449 |

|                             |                            |                             |                             |                             |
|-----------------------------|----------------------------|-----------------------------|-----------------------------|-----------------------------|
| R01_cb3025_c6/flp0/2486     | NA                         | NA                          | NA                          | R01_cb3025_c6/flp0/2486     |
| R01_cb7530_c10/flp1/2529    | NA                         | NA                          | NA                          | R01_cb7530_c10/flp1/2529    |
| R01_cb18456_c7232/flp0/593  | R01_cb18456_c7232/flp0/593 | R01_cb18456_c7232/flp0/593  | R01_cb18456_c7232/flp0/593  | R01_cb18456_c7232/flp0/593  |
| R01_cb10015_c353/flp1/908   | NA                         | R01_cb10015_c353/flp1/908   | NA                          | NA                          |
| R01_cb8564_c80473/flp0/3519 | NA                         | R01_cb8564_c80473/flp0/3519 | R01_cb8564_c80473/flp0/3519 | R01_cb8564_c80473/flp0/3519 |
| R01_cb8478_c47/flp0/2734    | NA                         | NA                          | NA                          | R01_cb8478_c47/flp0/2734    |
| R01_cb15680_c3/flp0/1859    | NA                         | NA                          | NA                          | R01_cb15680_c3/flp0/1859    |
| R01_cb2069_c2/flp0/4066     | NA                         | R01_cb2069_c2/flp0/4066     | NA                          | NA                          |
| R01_cb1993_c3/flp1/3160     | NA                         | NA                          | NA                          | R01_cb1993_c3/flp1/3160     |
| R01_cb1155_c4/flp0/4388     | NA                         | NA                          | NA                          | R01_cb1155_c4/flp0/4388     |
| R01_cb3732_c9/flp0/2702     | NA                         | NA                          | NA                          | R01_cb3732_c9/flp0/2702     |
| R01_cb1052_c15/flp0/4466    | NA                         | R01_cb1052_c15/flp0/4466    | NA                          | NA                          |
| R01_cb8564_c10155/flp0/2920 | NA                         | R01_cb8564_c10155/flp0/2920 | R01_cb8564_c10155/flp0/2920 | NA                          |
| R01_cb8564_c48900/flp0/2938 | NA                         | NA                          | NA                          | R01_cb8564_c48900/flp0/2938 |
| R01_cb2164_c16/flp0/2809    | R01_cb2164_c16/flp0/2809   | R01_cb2164_c16/flp0/2809    | R01_cb2164_c16/flp0/2809    | R01_cb2164_c16/flp0/2809    |
| R01_cb7020_c0/f2p0/2584     | NA                         | R01_cb7020_c0/f2p0/2584     | NA                          | NA                          |
| R01_cb4824_c11/flp0/3500    | R01_cb4824_c11/flp0/3500   | R01_cb4824_c11/flp0/3500    | R01_cb4824_c11/flp0/3500    | R01_cb4824_c11/flp0/3500    |
| R01_cb4744_c5/flp0/1551     | NA                         | R01_cb4744_c5/flp0/1551     | R01_cb4744_c5/flp0/1551     | R01_cb4744_c5/flp0/1551     |
| R01_cb2344_c0/flp0/3977     | R01_cb2344_c0/flp0/3977    | R01_cb2344_c0/flp0/3977     | NA                          | NA                          |
| R01_cb2052_c1/f2p0/4068     | NA                         | R01_cb2052_c1/f2p0/4068     | NA                          | NA                          |
| R01_cb1398_c11/flp0/2067    | NA                         | R01_cb1398_c11/flp0/2067    | R01_cb1398_c11/flp0/2067    | NA                          |
| R01_cb1993_c6/flp1/3216     | NA                         | NA                          | NA                          | R01_cb1993_c6/flp1/3216     |
| R01_cb9851_c3/flp0/2725     | R01_cb9851_c3/flp0/2725    | R01_cb9851_c3/flp0/2725     | R01_cb9851_c3/flp0/2725     | R01_cb9851_c3/flp0/2725     |
| R01_cb735_c2/flp0/2629      | NA                         | NA                          | NA                          | R01_cb735_c2/flp0/2629      |
| R01_cb8564_c20126/flp0/3488 | NA                         | R01_cb8564_c20126/flp0/3488 | R01_cb8564_c20126/flp0/3488 | R01_cb8564_c20126/flp0/3488 |
| R01_cb17954_c0/flp0/839     | R01_cb17954_c0/flp0/839    | R01_cb17954_c0/flp0/839     | NA                          | NA                          |

|                              |                             |                              |                              |                             |
|------------------------------|-----------------------------|------------------------------|------------------------------|-----------------------------|
| R01_cb10653_c2/f3p0/439      | R01_cb10653_c2/f3p0/439     | R01_cb10653_c2/f3p0/439      | NA                           | NA                          |
| R01_cb18226_c0/flp0/414      | R01_cb18226_c0/flp0/414     | R01_cb18226_c0/flp0/414      | R01_cb18226_c0/flp0/414      | R01_cb18226_c0/flp0/414     |
| R01_cb9506_c9/flp0/1111      | NA                          | NA                           | NA                           | R01_cb9506_c9/flp0/1111     |
| R01_cb7502_c6/flp0/2067      | NA                          | NA                           | NA                           | R01_cb7502_c6/flp0/2067     |
| R01_cb8475_c5/flp0/1159      | NA                          | R01_cb8475_c5/flp0/1159      | NA                           | NA                          |
| R01_cb17507_c0/f2p0/604      | NA                          | R01_cb17507_c0/f2p0/604      | R01_cb17507_c0/f2p0/604      | R01_cb17507_c0/f2p0/604     |
| R01_cb12579_c12/flp0/1340    | NA                          | R01_cb12579_c12/flp0/1340    | R01_cb12579_c12/flp0/1340    | R01_cb12579_c12/flp0/1340   |
| R01_cb15190_c0/flp0/782      | NA                          | R01_cb15190_c0/flp0/782      | NA                           | NA                          |
| R01_cb998_c2/f2p0/505        | R01_cb998_c2/f2p0/505       | R01_cb998_c2/f2p0/505        | NA                           | NA                          |
| R01_cb8564_c89806/flp0/2503  | R01_cb8564_c89806/flp0/2503 | R01_cb8564_c89806/flp0/2503  | NA                           | NA                          |
| R01_cb8564_c116631/flp0/2583 | NA                          | R01_cb8564_c116631/flp0/2583 | R01_cb8564_c116631/flp0/2583 | NA                          |
| R01_cb7588_c3/flp1/2578      | NA                          | R01_cb7588_c3/flp1/2578      | NA                           | NA                          |
| R01_cb18715_c1/flp0/721      | NA                          | NA                           | NA                           | R01_cb18715_c1/flp0/721     |
| R01_cb3518_c9/flp0/3635      | NA                          | R01_cb3518_c9/flp0/3635      | NA                           | NA                          |
| R01_cb7109_c19/flp0/649      | NA                          | R01_cb7109_c19/flp0/649      | NA                           | NA                          |
| R01_cb8799_c0/f3p0/2216      | NA                          | NA                           | NA                           | R01_cb8799_c0/f3p0/2216     |
| R01_cb8564_c92216/flp0/3345  | NA                          | R01_cb8564_c92216/flp0/3345  | R01_cb8564_c92216/flp0/3345  | R01_cb8564_c92216/flp0/3345 |
| R01_cb6608_c6/flp1/2415      | NA                          | NA                           | NA                           | R01_cb6608_c6/flp1/2415     |
| R01_cb17721_c4/flp0/1623     | NA                          | R01_cb17721_c4/flp0/1623     | NA                           | R01_cb17721_c4/flp0/1623    |
| R01_cb14795_c4/f2p0/657      | NA                          | R01_cb14795_c4/f2p0/657      | R01_cb14795_c4/f2p0/657      | R01_cb14795_c4/f2p0/657     |
| R01_cb17159_c1/flp0/719      | NA                          | NA                           | NA                           | R01_cb17159_c1/flp0/719     |
| R01_cb13146_c9/flp1/658      | NA                          | NA                           | R01_cb13146_c9/flp1/658      | NA                          |
| R01_cb17562_c7/flp0/608      | NA                          | R01_cb17562_c7/flp0/608      | NA                           | NA                          |
| R01_cb17321_c0/flp0/1816     | NA                          | R01_cb17321_c0/flp0/1816     | R01_cb17321_c0/flp0/1816     | NA                          |

|                             |                            |                             |                             |                             |
|-----------------------------|----------------------------|-----------------------------|-----------------------------|-----------------------------|
| R01_cb5297_c9/flp0/886      | NA                         | R01_cb5297_c9/flp0/886      | NA                          | NA                          |
| R01_cb17033_c0/flp0/1184    | NA                         | NA                          | NA                          | R01_cb17033_c0/flp0/1184    |
| R01_cb7027_c4/flp0/1300     | R01_cb7027_c4/flp0/1300    | R01_cb7027_c4/flp0/1300     | R01_cb7027_c4/flp0/1300     | R01_cb7027_c4/flp0/1300     |
| R01_cb1178_c19/flp0/1460    | NA                         | NA                          | NA                          | R01_cb1178_c19/flp0/1460    |
| R01_cb8564_c85602/flp0/4985 | NA                         | R01_cb8564_c85602/flp0/4985 | NA                          | R01_cb8564_c85602/flp0/4985 |
| R01_cb16850_c0/flp0/1708    | NA                         | R01_cb16850_c0/flp0/1708    | R01_cb16850_c0/flp0/1708    | NA                          |
| R01_cb822_c16/flp3/2585     | NA                         | NA                          | NA                          | R01_cb822_c16/flp3/2585     |
| R01_cb6574_c0/flp0/2834     | NA                         | R01_cb6574_c0/flp0/2834     | NA                          | NA                          |
| R01_cb18456_c8001/flp0/487  | R01_cb18456_c8001/flp0/487 | R01_cb18456_c8001/flp0/487  | NA                          | NA                          |
| R01_cb5658_c4/flp0/2844     | NA                         | NA                          | NA                          | R01_cb5658_c4/flp0/2844     |
| R01_cb16341_c7/flp0/460     | R01_cb16341_c7/flp0/460    | R01_cb16341_c7/flp0/460     | R01_cb16341_c7/flp0/460     | R01_cb16341_c7/flp0/460     |
| R01_cb8087_c5/flp0/3215     | NA                         | R01_cb8087_c5/flp0/3215     | NA                          | NA                          |
| R01_cb8219_c10/flp1/2990    | NA                         | R01_cb8219_c10/flp1/2990    | NA                          | NA                          |
| R01_cb12443_c5/flp0/527     | R01_cb12443_c5/flp0/527    | R01_cb12443_c5/flp0/527     | R01_cb12443_c5/flp0/527     | R01_cb12443_c5/flp0/527     |
| R01_cb8564_c90360/flp0/2334 | NA                         | R01_cb8564_c90360/flp0/2334 | R01_cb8564_c90360/flp0/2334 | NA                          |
| R01_cb8564_c1022/flp0/2466  | R01_cb8564_c1022/flp0/2466 | R01_cb8564_c1022/flp0/2466  | R01_cb8564_c1022/flp0/2466  | NA                          |
| R01_cb13545_c15/f2p0/675    | R01_cb13545_c15/f2p0/675   | R01_cb13545_c15/f2p0/675    | R01_cb13545_c15/f2p0/675    | R01_cb13545_c15/f2p0/675    |
| R01_cb7806_c8/flp0/1654     | R01_cb7806_c8/flp0/1654    | R01_cb7806_c8/flp0/1654     | R01_cb7806_c8/flp0/1654     | R01_cb7806_c8/flp0/1654     |
| R01_cb8084_c3/flp1/2128     | NA                         | NA                          | NA                          | R01_cb8084_c3/flp1/2128     |
| R01_cb1388_c1/f3p2/4341     | NA                         | NA                          | NA                          | R01_cb1388_c1/f3p2/4341     |
| R01_cb1599_c0/flp0/4125     | NA                         | NA                          | NA                          | R01_cb1599_c0/flp0/4125     |
| R01_cb4600_c17/f4p1/2134    | NA                         | NA                          | NA                          | R01_cb4600_c17/f4p1/2134    |
| R01_cb11019_c2/flp0/1867    | NA                         | NA                          | NA                          | R01_cb11019_c2/flp0/1867    |
| R01_cb2161_c14/flp0/3605    | NA                         | NA                          | NA                          | R01_cb2161_c14/flp0/3605    |
| R01_cb13862_c1/f2p0/1481    | NA                         | R01_cb13862_c1/f2p0/1481    | R01_cb13862_c1/f2p0/1481    | R01_cb13862_c1/f2p0/1481    |
| R01_cb15958_c6/flp0/974     | R01_cb15958_c6/flp0/974    | R01_cb15958_c6/flp0/974     | NA                          | R01_cb15958_c6/flp0/974     |

|                             |                           |                             |                             |                             |
|-----------------------------|---------------------------|-----------------------------|-----------------------------|-----------------------------|
| R01_cb18152_c0/flp0/525     | NA                        | R01_cb18152_c0/flp0/525     | NA                          | NA                          |
| R01_cb11931_c5/f2p0/422     | NA                        | R01_cb11931_c5/f2p0/422     | NA                          | NA                          |
| R01_cb8564_c83469/flp0/2306 | NA                        | NA                          | R01_cb8564_c83469/flp0/2306 | R01_cb8564_c83469/flp0/2306 |
| R01_cb15765_c1/flp0/808     | NA                        | R01_cb15765_c1/flp0/808     | R01_cb15765_c1/flp0/808     | R01_cb15765_c1/flp0/808     |
| R01_cb18192_c13/flp0/1373   | NA                        | R01_cb18192_c13/flp0/1373   | R01_cb18192_c13/flp0/1373   | NA                          |
| R01_cb3426_c11/flp1/3455    | NA                        | NA                          | NA                          | R01_cb3426_c11/flp1/3455    |
| R01_cb12374_c4/flp1/453     | NA                        | R01_cb12374_c4/flp1/453     | R01_cb12374_c4/flp1/453     | R01_cb12374_c4/flp1/453     |
| R01_cb15811_c23/flp0/1267   | R01_cb15811_c23/flp0/1267 | R01_cb15811_c23/flp0/1267   | R01_cb15811_c23/flp0/1267   | R01_cb15811_c23/flp0/1267   |
| R01_cb15440_c3/flp0/442     | NA                        | R01_cb15440_c3/flp0/442     | R01_cb15440_c3/flp0/442     | R01_cb15440_c3/flp0/442     |
| R01_cb10327_c9/flp0/1463    | NA                        | R01_cb10327_c9/flp0/1463    | NA                          | NA                          |
| R01_cb8334_c0/flp0/2398     | NA                        | R01_cb8334_c0/flp0/2398     | NA                          | NA                          |
| R01_cb8564_c1357/flp0/3246  | NA                        | NA                          | NA                          | R01_cb8564_c1357/flp0/3246  |
| R01_cb787_c0/flp0/4629      | R01_cb787_c0/flp0/4629    | R01_cb787_c0/flp0/4629      | NA                          | NA                          |
| R01_cb7023_c4/flp0/2631     | NA                        | R01_cb7023_c4/flp0/2631     | R01_cb7023_c4/flp0/2631     | R01_cb7023_c4/flp0/2631     |
| R01_cb17013_c0/f2p0/693     | NA                        | NA                          | NA                          | R01_cb17013_c0/f2p0/693     |
| R01_cb10008_c3/flp0/2867    | NA                        | NA                          | NA                          | R01_cb10008_c3/flp0/2867    |
| R01_cb8564_c21988/flp0/2578 | NA                        | R01_cb8564_c21988/flp0/2578 | R01_cb8564_c21988/flp0/2578 | R01_cb8564_c21988/flp0/2578 |
| R01_cb14341_c0/flp0/608     | R01_cb14341_c0/flp0/608   | R01_cb14341_c0/flp0/608     | R01_cb14341_c0/flp0/608     | R01_cb14341_c0/flp0/608     |
| R01_cb18423_c2/flp0/533     | NA                        | NA                          | NA                          | R01_cb18423_c2/flp0/533     |
| R01_cb8564_c17470/flp0/2900 | NA                        | R01_cb8564_c17470/flp0/2900 | NA                          | NA                          |
| R01_cb18511_c1/flp0/1184    | R01_cb18511_c1/flp0/1184  | R01_cb18511_c1/flp0/1184    | R01_cb18511_c1/flp0/1184    | NA                          |
| R01_cb10198_c2/f2p0/668     | NA                        | R01_cb10198_c2/f2p0/668     | NA                          | NA                          |
| R01_cb14058_c1/flp0/1424    | NA                        | R01_cb14058_c1/flp0/1424    | NA                          | NA                          |
| R01_cb1686_c4/flp0/2096     | NA                        | NA                          | R01_cb1686_c4/flp0/2096     | NA                          |
| R01_cb15811_c20/flp0/1153   | NA                        | R01_cb15811_c20/flp0/1153   | R01_cb15811_c20/flp0/1153   | R01_cb15811_c20/flp0/1153   |
| R01_cb8564_c25152/flp0/3291 | NA                        | R01_cb8564_c25152/flp0/3291 | NA                          | NA                          |

|                              |                              |                              |                              |                              |
|------------------------------|------------------------------|------------------------------|------------------------------|------------------------------|
| R01_cb12443_c6/flp0/502      | NA                           | R01_cb12443_c6/flp0/502      | R01_cb12443_c6/flp0/502      | R01_cb12443_c6/flp0/502      |
| R01_cb11754_c1/flp0/3465     | NA                           | R01_cb11754_c1/flp0/3465     | NA                           | NA                           |
| R01_cb14314_c0/f2p0/327      | R01_cb14314_c0/f2p0/327      | R01_cb14314_c0/f2p0/327      | R01_cb14314_c0/f2p0/327      | R01_cb14314_c0/f2p0/327      |
| R01_cb7687_c2/f4p1/2416      | NA                           | NA                           | NA                           | R01_cb7687_c2/f4p1/2416      |
| R01_cb2415_c7/flp0/3359      | R01_cb2415_c7/flp0/3359      | R01_cb2415_c7/flp0/3359      | R01_cb2415_c7/flp0/3359      | R01_cb2415_c7/flp0/3359      |
| R01_cb7687_c3/flp0/2557      | NA                           | NA                           | NA                           | R01_cb7687_c3/flp0/2557      |
| R01_cb7197_c4/flp0/3076      | NA                           | R01_cb7197_c4/flp0/3076      | NA                           | NA                           |
| R01_cb13178_c13/flp0/587     | NA                           | R01_cb13178_c13/flp0/587     | NA                           | NA                           |
| R01_cb17532_c4/flp0/5275     | NA                           | NA                           | NA                           | R01_cb17532_c4/flp0/5275     |
| R01_cb1097_c9/flp0/4066      | NA                           | NA                           | NA                           | R01_cb1097_c9/flp0/4066      |
| R01_cb8564_c120522/flp0/2575 | R01_cb8564_c120522/flp0/2575 | R01_cb8564_c120522/flp0/2575 | R01_cb8564_c120522/flp0/2575 | R01_cb8564_c120522/flp0/2575 |
| R01_cb2072_c34/flp0/3119     | NA                           | NA                           | NA                           | R01_cb2072_c34/flp0/3119     |
| R01_cb15811_c13/flp0/750     | R01_cb15811_c13/flp0/750     | R01_cb15811_c13/flp0/750     | R01_cb15811_c13/flp0/750     | R01_cb15811_c13/flp0/750     |
| R01_cb12587_c6/flp0/1591     | NA                           | NA                           | NA                           | R01_cb12587_c6/flp0/1591     |
| R01_cb13442_c1/flp0/937      | NA                           | NA                           | NA                           | R01_cb13442_c1/flp0/937      |
| R01_cb9154_c4/flp0/2109      | NA                           | NA                           | NA                           | R01_cb9154_c4/flp0/2109      |
| R01_cb15724_c3/flp0/1046     | NA                           | R01_cb15724_c3/flp0/1046     | R01_cb15724_c3/flp0/1046     | R01_cb15724_c3/flp0/1046     |
| R01_cb10837_c3/flp0/2634     | R01_cb10837_c3/flp0/2634     | R01_cb10837_c3/flp0/2634     | R01_cb10837_c3/flp0/2634     | R01_cb10837_c3/flp0/2634     |
| R01_cb15092_c9/flp0/436      | NA                           | R01_cb15092_c9/flp0/436      | NA                           | R01_cb15092_c9/flp0/436      |
| R01_cb1092_c0/flp0/4479      | NA                           | R01_cb1092_c0/flp0/4479      | NA                           | R01_cb1092_c0/flp0/4479      |
| R01_cb18385_c0/flp0/1881     | NA                           | R01_cb18385_c0/flp0/1881     | NA                           | NA                           |
| R01_cb8102_c20/f21p0/1923    | NA                           | NA                           | NA                           | R01_cb8102_c20/f21p0/1923    |
| R01_cb3859_c0/f3p1/1826      | NA                           | NA                           | NA                           | R01_cb3859_c0/f3p1/1826      |
| R01_cb4223_c2/flp0/2041      | NA                           | NA                           | NA                           | R01_cb4223_c2/flp0/2041      |
| R01_cb15853_c0/fl0p0/495     | R01_cb15853_c0/fl0p0/495     | R01_cb15853_c0/fl0p0/495     | NA                           | R01_cb15853_c0/fl0p0/495     |

|                             |                                  |                             |                             |                             |
|-----------------------------|----------------------------------|-----------------------------|-----------------------------|-----------------------------|
| R01_cb18456_c4928/flp0/1102 | R01_cb18456_c4928/flp0/1102<br>2 | R01_cb18456_c4928/flp0/1102 | NA                          | NA                          |
| R01_cb7110_c0/f2p0/1460     | NA                               | NA                          | NA                          | R01_cb7110_c0/f2p0/1460     |
| R01_cb6318_c23/flp1/2399    | NA                               | R01_cb6318_c23/flp1/2399    | NA                          | NA                          |
| R01_cb4484_c0/flp0/3132     | NA                               | R01_cb4484_c0/flp0/3132     | NA                          | NA                          |
| R01_cb9214_c11/flp0/2500    | NA                               | R01_cb9214_c11/flp0/2500    | NA                          | NA                          |
| R01_cb17756_c23/flp0/369    | NA                               | R01_cb17756_c23/flp0/369    | R01_cb17756_c23/flp0/369    | R01_cb17756_c23/flp0/369    |
| R01_cb17016_c1/flp0/1317    | NA                               | NA                          | NA                          | R01_cb17016_c1/flp0/1317    |
| R01_cb3732_c8/flp0/2774     | NA                               | NA                          | NA                          | R01_cb3732_c8/flp0/2774     |
| R01_cb13028_c2/flp0/893     | NA                               | NA                          | NA                          | R01_cb13028_c2/flp0/893     |
| R01_cb10750_c0/f2p0/782     | NA                               | NA                          | R01_cb10750_c0/f2p0/782     | R01_cb10750_c0/f2p0/782     |
| R01_cb8564_c1410/flp0/3134  | NA                               | R01_cb8564_c1410/flp0/3134  | NA                          | NA                          |
| R01_cb4532_c2/flp1/3318     | NA                               | R01_cb4532_c2/flp1/3318     | NA                          | NA                          |
| R01_cb8564_c88936/flp1/2270 | NA                               | R01_cb8564_c88936/flp1/2270 | R01_cb8564_c88936/flp1/2270 | R01_cb8564_c88936/flp1/2270 |
| R01_cb6253_c0/flp0/2902     | NA                               | R01_cb6253_c0/flp0/2902     | R01_cb6253_c0/flp0/2902     | R01_cb6253_c0/flp0/2902     |
| R01_cb15963_c1/flp0/669     | NA                               | R01_cb15963_c1/flp0/669     | R01_cb15963_c1/flp0/669     | NA                          |
| R01_cb3088_c7/flp0/1809     | NA                               | R01_cb3088_c7/flp0/1809     | R01_cb3088_c7/flp0/1809     | R01_cb3088_c7/flp0/1809     |
| R01_cb18457_c0/flp0/1409    | NA                               | NA                          | NA                          | R01_cb18457_c0/flp0/1409    |
| R01_cb8564_c47497/flp0/2695 | R01_cb8564_c47497/flp0/2695<br>5 | R01_cb8564_c47497/flp0/2695 | R01_cb8564_c47497/flp0/2695 | R01_cb8564_c47497/flp0/2695 |
| R01_cb5641_c6/flp1/1919     | NA                               | NA                          | NA                          | R01_cb5641_c6/flp1/1919     |
| R01_cb2154_c9/flp0/2457     | NA                               | R01_cb2154_c9/flp0/2457     | NA                          | NA                          |
| R01_cb16636_c2/flp1/1850    | NA                               | R01_cb16636_c2/flp1/1850    | NA                          | NA                          |
| R01_cb8564_c53806/flp3/3974 | NA                               | NA                          | NA                          | R01_cb8564_c53806/flp3/3974 |
| R01_cb10637_c0/flp0/1826    | NA                               | R01_cb10637_c0/flp0/1826    | R01_cb10637_c0/flp0/1826    | R01_cb10637_c0/flp0/1826    |
| R01_cb8564_c90042/flp0/3733 | NA                               | R01_cb8564_c90042/flp0/3733 | NA                          | NA                          |



|                              |                         |                             |                          |                              |
|------------------------------|-------------------------|-----------------------------|--------------------------|------------------------------|
| R01_cb15998_c1/flp0/1758     | NA                      | NA                          | NA                       | R01_cb15998_c1/flp0/1758     |
| R01_cb18603_c0/flp0/498      | R01_cb18603_c0/flp0/498 | R01_cb18603_c0/flp0/498     | R01_cb18603_c0/flp0/498  | R01_cb18603_c0/flp0/498      |
| R01_cb17207_c1/flp0/715      | NA                      | NA                          | NA                       | R01_cb17207_c1/flp0/715      |
| R01_cb3464_c0/f3p1/3585      | NA                      | NA                          | NA                       | R01_cb3464_c0/f3p1/3585      |
| R01_cb2425_c9/f5p0/2281      | NA                      | NA                          | NA                       | R01_cb2425_c9/f5p0/2281      |
| R01_cb11395_c3/f3p0/1346     | NA                      | NA                          | NA                       | R01_cb11395_c3/f3p0/1346     |
| R01_cb18209_c0/f3p0/1446     | NA                      | R01_cb18209_c0/f3p0/1446    | NA                       | R01_cb18209_c0/f3p0/1446     |
| R01_cb10837_c5/flp0/705      | NA                      | R01_cb10837_c5/flp0/705     | NA                       | R01_cb10837_c5/flp0/705      |
| R01_cb10029_c1275/flp3/881   | NA                      | R01_cb10029_c1275/flp3/881  | NA                       | NA                           |
| R01_cb11291_c0/flp0/621      | R01_cb11291_c0/flp0/621 | R01_cb11291_c0/flp0/621     | R01_cb11291_c0/flp0/621  | R01_cb11291_c0/flp0/621      |
| R01_cb10148_c13/f3p0/1791    | NA                      | NA                          | NA                       | R01_cb10148_c13/f3p0/1791    |
| R01_cb3757_c1/flp0/3354      | NA                      | NA                          | NA                       | R01_cb3757_c1/flp0/3354      |
| R01_cb8564_c123568/flp0/2478 | NA                      | NA                          | NA                       | R01_cb8564_c123568/flp0/2478 |
| R01_cb2629_c30/flp0/3025     | NA                      | NA                          | NA                       | R01_cb2629_c30/flp0/3025     |
| R01_cb10742_c8/flp0/973      | NA                      | NA                          | NA                       | R01_cb10742_c8/flp0/973      |
| R01_cb4102_c1/flp0/3375      | NA                      | R01_cb4102_c1/flp0/3375     | NA                       | NA                           |
| R01_cb8298_c0/flp0/2384      | R01_cb8298_c0/flp0/2384 | R01_cb8298_c0/flp0/2384     | R01_cb8298_c0/flp0/2384  | R01_cb8298_c0/flp0/2384      |
| R01_cb8564_c71883/flp0/2864  | NA                      | R01_cb8564_c71883/flp0/2864 | NA                       | NA                           |
| R01_cb5659_c20/f5p0/2269     | NA                      | NA                          | NA                       | R01_cb5659_c20/f5p0/2269     |
| R01_cb8564_c16003/flp0/4482  | NA                      | R01_cb8564_c16003/flp0/4482 | NA                       | NA                           |
| R01_cb10088_c12/flp0/1263    | NA                      | R01_cb10088_c12/flp0/1263   | NA                       | NA                           |
| R01_cb13396_c2/f2p0/1273     | NA                      | R01_cb13396_c2/f2p0/1273    | R01_cb13396_c2/f2p0/1273 | R01_cb13396_c2/f2p0/1273     |
| R01_cb3370_c1/flp0/3646      | NA                      | R01_cb3370_c1/flp0/3646     | NA                       | NA                           |
| R01_cb12373_c1/flp0/465      | R01_cb12373_c1/flp0/465 | R01_cb12373_c1/flp0/465     | R01_cb12373_c1/flp0/465  | R01_cb12373_c1/flp0/465      |
| R01_cb709_c10/flp0/2582      | NA                      | R01_cb709_c10/flp0/2582     | NA                       | NA                           |

|                                  |                            |                             |                             |                                  |
|----------------------------------|----------------------------|-----------------------------|-----------------------------|----------------------------------|
| R01_cb454_c31/flp0/2723          | NA                         | NA                          | NA                          | R01_cb454_c31/flp0/2723          |
| R01_cb6819_c6/flp0/5409          | NA                         | NA                          | NA                          | R01_cb6819_c6/flp0/5409          |
| R01_cb18218_c0/f2p0/1448         | NA                         | NA                          | NA                          | R01_cb18218_c0/f2p0/1448         |
| R01_cb2780_c6/flp1/3788          | NA                         | R01_cb2780_c6/flp1/3788     | NA                          | NA                               |
| R01_cb14134_c2/flp0/1181         | NA                         | R01_cb14134_c2/flp0/1181    | NA                          | NA                               |
| R01_cb14684_c2/flp0/604          | NA                         | R01_cb14684_c2/flp0/604     | NA                          | NA                               |
| R01_cb8564_c76073/flp0/2976      | NA                         | R01_cb8564_c76073/flp0/2976 | R01_cb8564_c76073/flp0/2976 | R01_cb8564_c76073/flp0/2976      |
| R01_cb16268_c1/flp0/786          | R01_cb16268_c1/flp0/786    | R01_cb16268_c1/flp0/786     | R01_cb16268_c1/flp0/786     | R01_cb16268_c1/flp0/786          |
| R01_cb12837_c23/flp0/755         | NA                         | R01_cb12837_c23/flp0/755    | NA                          | NA                               |
| R01_cb4471_c5/flp1/3026          | NA                         | R01_cb4471_c5/flp1/3026     | NA                          | R01_cb4471_c5/flp1/3026          |
| R01_cb14223_c0/f5p0/449          | NA                         | NA                          | R01_cb14223_c0/f5p0/449     | R01_cb14223_c0/f5p0/449          |
| R01_cb18456_c4798/flp1/481       | R01_cb18456_c4798/flp1/481 | NA                          | NA                          | R01_cb18456_c4798/flp1/481       |
| R01_cb1682_c5/flp1/3916          | NA                         | NA                          | NA                          | R01_cb1682_c5/flp1/3916          |
| R01_cb8564_c112476/flp0/196<br>1 | NA                         | NA                          | NA                          | R01_cb8564_c112476/flp0/196<br>1 |
| R01_cb4594_c2/flp0/3067          | NA                         | NA                          | NA                          | R01_cb4594_c2/flp0/3067          |
| R01_cb2991_c5/flp1/2528          | NA                         | NA                          | NA                          | R01_cb2991_c5/flp1/2528          |
| R01_cb12573_c19/flp0/798         | NA                         | R01_cb12573_c19/flp0/798    | NA                          | NA                               |
| R01_cb8564_c91354/flp0/3094      | NA                         | NA                          | NA                          | R01_cb8564_c91354/flp0/3094      |
| R01_cb8564_c4634/f2p2/3151       | NA                         | R01_cb8564_c4634/f2p2/3151  | R01_cb8564_c4634/f2p2/3151  | R01_cb8564_c4634/f2p2/3151       |
| R01_cb9824_c31/flp0/495          | R01_cb9824_c31/flp0/495    | R01_cb9824_c31/flp0/495     | R01_cb9824_c31/flp0/495     | R01_cb9824_c31/flp0/495          |
| R01_cb4639_c9/flp0/2392          | NA                         | NA                          | NA                          | R01_cb4639_c9/flp0/2392          |
| R01_cb8564_c125229/f2p0/255<br>3 | NA                         | NA                          | NA                          | R01_cb8564_c125229/f2p0/255<br>3 |
| R01_cb8162_c2/flp0/2194          | NA                         | NA                          | NA                          | R01_cb8162_c2/flp0/2194          |
| R01_cb8954_c11/flp0/3820         | NA                         | NA                          | NA                          | R01_cb8954_c11/flp0/3820         |

|                             |                             |                             |                             |                             |
|-----------------------------|-----------------------------|-----------------------------|-----------------------------|-----------------------------|
| R01_cb6922_c4/flp0/1252     | NA                          | NA                          | NA                          | R01_cb6922_c4/flp0/1252     |
| R01_cb8564_c76538/flp0/3810 | R01_cb8564_c76538/flp0/3810 | R01_cb8564_c76538/flp0/3810 | R01_cb8564_c76538/flp0/3810 | R01_cb8564_c76538/flp0/3810 |
| R01_cb17050_c0/f3p0/1730    | R01_cb17050_c0/f3p0/1730    | R01_cb17050_c0/f3p0/1730    | R01_cb17050_c0/f3p0/1730    | R01_cb17050_c0/f3p0/1730    |
| R01_cb8564_c86657/flp0/3031 | NA                          | NA                          | NA                          | R01_cb8564_c86657/flp0/3031 |
| R01_cb17711_c1/flp0/1361    | NA                          | R01_cb17711_c1/flp0/1361    | NA                          | NA                          |
| R01_cb625_c9/flp2/3104      | NA                          | NA                          | NA                          | R01_cb625_c9/flp2/3104      |
| R01_cb2744_c3/flp0/1362     | NA                          | R01_cb2744_c3/flp0/1362     | NA                          | R01_cb2744_c3/flp0/1362     |
| R01_cb6362_c3/flp1/2875     | NA                          | R01_cb6362_c3/flp1/2875     | NA                          | NA                          |
| R01_cb2042_c5/flp0/2493     | NA                          | R01_cb2042_c5/flp0/2493     | NA                          | R01_cb2042_c5/flp0/2493     |
| R01_cb8564_c86976/flp0/2183 | NA                          | R01_cb8564_c86976/flp0/2183 | NA                          | NA                          |
| R01_cb18456_c6347/flp0/1018 | NA                          | R01_cb18456_c6347/flp0/1018 | NA                          | NA                          |
| R01_cb14153_c4/flp0/1159    | NA                          | R01_cb14153_c4/flp0/1159    | R01_cb14153_c4/flp0/1159    | NA                          |
| R01_cb11027_c0/flp1/604     | R01_cb11027_c0/flp1/604     | R01_cb11027_c0/flp1/604     | NA                          | R01_cb11027_c0/flp1/604     |
| R01_cb12524_c12/f2p1/619    | NA                          | R01_cb12524_c12/f2p1/619    | NA                          | NA                          |
| R01_cb8564_c86787/flp0/2176 | NA                          | R01_cb8564_c86787/flp0/2176 | NA                          | R01_cb8564_c86787/flp0/2176 |
| R01_cb18577_c1/flp0/959     | NA                          | NA                          | NA                          | R01_cb18577_c1/flp0/959     |
| R01_cb8564_c2548/flp1/2656  | NA                          | NA                          | R01_cb8564_c2548/flp1/2656  | R01_cb8564_c2548/flp1/2656  |
| R01_cb8564_c44341/flp0/4569 | NA                          | R01_cb8564_c44341/flp0/4569 | NA                          | R01_cb8564_c44341/flp0/4569 |
| R01_cb8564_c90788/flp0/2216 | NA                          | R01_cb8564_c90788/flp0/2216 | NA                          | NA                          |
| R01_cb18358_c0/flp0/527     | NA                          | R01_cb18358_c0/flp0/527     | R01_cb18358_c0/flp0/527     | R01_cb18358_c0/flp0/527     |
| R01_cb8376_c0/f2p0/1873     | NA                          | NA                          | NA                          | R01_cb8376_c0/f2p0/1873     |
| R01_cb17703_c0/flp0/1359    | NA                          | R01_cb17703_c0/flp0/1359    | NA                          | R01_cb17703_c0/flp0/1359    |
| R01_cb11331_c3/flp0/2375    | NA                          | R01_cb11331_c3/flp0/2375    | NA                          | NA                          |
| R01_cb7775_c2/flp0/2100     | NA                          | NA                          | NA                          | R01_cb7775_c2/flp0/2100     |
| R01_cb9643_c4/flp0/1253     | NA                          | R01_cb9643_c4/flp0/1253     | R01_cb9643_c4/flp0/1253     | R01_cb9643_c4/flp0/1253     |

|                             |                          |                             |                             |                             |
|-----------------------------|--------------------------|-----------------------------|-----------------------------|-----------------------------|
| R01_cb18500_c0/f2p0/660     | NA                       | R01_cb18500_c0/f2p0/660     | NA                          | R01_cb18500_c0/f2p0/660     |
| R01_cb18621_c1/f1p0/477     | NA                       | R01_cb18621_c1/f1p0/477     | NA                          | R01_cb18621_c1/f1p0/477     |
| R01_cb13638_c4/f1p0/1123    | NA                       | NA                          | NA                          | R01_cb13638_c4/f1p0/1123    |
| R01_cb18655_c5/f1p1/1401    | NA                       | R01_cb18655_c5/f1p1/1401    | NA                          | R01_cb18655_c5/f1p1/1401    |
| R01_cb8564_c84851/f2p0/2694 | NA                       | R01_cb8564_c84851/f2p0/2694 | R01_cb8564_c84851/f2p0/2694 | R01_cb8564_c84851/f2p0/2694 |
| R01_cb18186_c0/f1p0/540     | NA                       | R01_cb18186_c0/f1p0/540     | R01_cb18186_c0/f1p0/540     | R01_cb18186_c0/f1p0/540     |
| R01_cb8538_c0/f2p0/2101     | NA                       | NA                          | NA                          | R01_cb8538_c0/f2p0/2101     |
| R01_cb8564_c41184/f1p0/2767 | NA                       | R01_cb8564_c41184/f1p0/2767 | R01_cb8564_c41184/f1p0/2767 | R01_cb8564_c41184/f1p0/2767 |
| R01_cb8564_c82386/f1p1/2330 | NA                       | NA                          | NA                          | R01_cb8564_c82386/f1p1/2330 |
| R01_cb781_c36/f1p0/1809     | NA                       | NA                          | NA                          | R01_cb781_c36/f1p0/1809     |
| R01_cb8564_c80423/f1p0/3018 | NA                       | R01_cb8564_c80423/f1p0/3018 | NA                          | NA                          |
| R01_cb5952_c4/f1p0/1479     | R01_cb5952_c4/f1p0/1479  | R01_cb5952_c4/f1p0/1479     | NA                          | R01_cb5952_c4/f1p0/1479     |
| R01_cb18557_c0/f2p0/887     | NA                       | NA                          | NA                          | R01_cb18557_c0/f2p0/887     |
| R01_cb18757_c7/f1p0/2486    | R01_cb18757_c7/f1p0/2486 | R01_cb18757_c7/f1p0/2486    | R01_cb18757_c7/f1p0/2486    | R01_cb18757_c7/f1p0/2486    |
| R01_cb8564_c88557/f1p3/2757 | NA                       | NA                          | NA                          | R01_cb8564_c88557/f1p3/2757 |
| R01_cb18456_c6115/f1p0/821  | NA                       | R01_cb18456_c6115/f1p0/821  | R01_cb18456_c6115/f1p0/821  | NA                          |
| R01_cb14675_c1/f4p1/859     | R01_cb14675_c1/f4p1/859  | R01_cb14675_c1/f4p1/859     | R01_cb14675_c1/f4p1/859     | R01_cb14675_c1/f4p1/859     |
| R01_cb8564_c1326/f1p1/3181  | NA                       | NA                          | NA                          | R01_cb8564_c1326/f1p1/3181  |
| R01_cb1618_c7/f1p0/4246     | NA                       | R01_cb1618_c7/f1p0/4246     | NA                          | NA                          |
| R01_cb8564_c77158/f1p0/4524 | NA                       | NA                          | NA                          | R01_cb8564_c77158/f1p0/4524 |
| R01_cb10867_c3/f1p0/4372    | NA                       | NA                          | NA                          | R01_cb10867_c3/f1p0/4372    |
| R01_cb5373_c4/f1p0/2557     | NA                       | NA                          | NA                          | R01_cb5373_c4/f1p0/2557     |
| R01_cb10292_c3/f1p0/1200    | NA                       | NA                          | NA                          | R01_cb10292_c3/f1p0/1200    |
| R01_cb4141_c4/f1p1/2427     | NA                       | R01_cb4141_c4/f1p1/2427     | NA                          | NA                          |
| R01_cb1333_c44/f1p0/2307    | NA                       | R01_cb1333_c44/f1p0/2307    | R01_cb1333_c44/f1p0/2307    | R01_cb1333_c44/f1p0/2307    |
| R01_cb778_c27/f1p0/979      | NA                       | R01_cb778_c27/f1p0/979      | NA                          | R01_cb778_c27/f1p0/979      |

|                             |                         |                             |                             |                             |
|-----------------------------|-------------------------|-----------------------------|-----------------------------|-----------------------------|
| R01_cb17604_c5/flp0/1439    | NA                      | R01_cb17604_c5/flp0/1439    | R01_cb17604_c5/flp0/1439    | R01_cb17604_c5/flp0/1439    |
| R01_cb8564_c88764/flp0/2888 | NA                      | R01_cb8564_c88764/flp0/2888 | NA                          | R01_cb8564_c88764/flp0/2888 |
| R01_cb12_c16/flp0/3169      | NA                      | NA                          | NA                          | R01_cb12_c16/flp0/3169      |
| R01_cb1230_c2/flp0/4109     | NA                      | R01_cb1230_c2/flp0/4109     | R01_cb1230_c2/flp0/4109     | R01_cb1230_c2/flp0/4109     |
| R01_cb12461_c1/f4p0/522     | NA                      | R01_cb12461_c1/f4p0/522     | NA                          | R01_cb12461_c1/f4p0/522     |
| R01_cb17374_c3/flp0/668     | R01_cb17374_c3/flp0/668 | R01_cb17374_c3/flp0/668     | R01_cb17374_c3/flp0/668     | R01_cb17374_c3/flp0/668     |
| R01_cb8564_c23304/flp0/2812 | NA                      | R01_cb8564_c23304/flp0/2812 | NA                          | NA                          |
| R01_cb11869_c9/flp0/421     | R01_cb11869_c9/flp0/421 | R01_cb11869_c9/flp0/421     | NA                          | NA                          |
| R01_cb15151_c0/flp0/913     | NA                      | NA                          | R01_cb15151_c0/flp0/913     | R01_cb15151_c0/flp0/913     |
| R01_cb16045_c2/flp0/765     | NA                      | R01_cb16045_c2/flp0/765     | NA                          | NA                          |
| R01_cb8564_c1800/f2p0/2439  | NA                      | R01_cb8564_c1800/f2p0/2439  | NA                          | NA                          |
| R01_cb10522_c7/flp0/1216    | NA                      | R01_cb10522_c7/flp0/1216    | NA                          | NA                          |
| R01_cb15644_c1/flp0/721     | NA                      | R01_cb15644_c1/flp0/721     | R01_cb15644_c1/flp0/721     | R01_cb15644_c1/flp0/721     |
| R01_cb16963_c0/flp0/553     | NA                      | R01_cb16963_c0/flp0/553     | NA                          | NA                          |
| R01_cb197_c10/flp0/6515     | NA                      | R01_cb197_c10/flp0/6515     | NA                          | NA                          |
| R01_cb8564_c1887/flp0/2257  | NA                      | NA                          | NA                          | R01_cb8564_c1887/flp0/2257  |
| R01_cb4490_c2/flp0/3341     | R01_cb4490_c2/flp0/3341 | R01_cb4490_c2/flp0/3341     | R01_cb4490_c2/flp0/3341     | R01_cb4490_c2/flp0/3341     |
| R01_cb8564_c5266/flp0/3784  | NA                      | R01_cb8564_c5266/flp0/3784  | NA                          | NA                          |
| R01_cb3478_c2/flp1/3546     | R01_cb3478_c2/flp1/3546 | R01_cb3478_c2/flp1/3546     | R01_cb3478_c2/flp1/3546     | R01_cb3478_c2/flp1/3546     |
| R01_cb5007_c4/f2p0/760      | NA                      | R01_cb5007_c4/f2p0/760      | NA                          | NA                          |
| R01_cb8564_c86075/flp0/3136 | NA                      | R01_cb8564_c86075/flp0/3136 | R01_cb8564_c86075/flp0/3136 | NA                          |
| R01_cb15106_c5/flp0/884     | R01_cb15106_c5/flp0/884 | R01_cb15106_c5/flp0/884     | R01_cb15106_c5/flp0/884     | NA                          |
| R01_cb4564_c8/flp0/3311     | NA                      | R01_cb4564_c8/flp0/3311     | NA                          | NA                          |
| R01_cb8549_c1/flp0/2974     | NA                      | NA                          | NA                          | R01_cb8549_c1/flp0/2974     |
| R01_cb5499_c3/flp0/3045     | R01_cb5499_c3/flp0/3045 | R01_cb5499_c3/flp0/3045     | R01_cb5499_c3/flp0/3045     | R01_cb5499_c3/flp0/3045     |
| R01_cb6894_c3/flp0/6832     | NA                      | R01_cb6894_c3/flp0/6832     | NA                          | R01_cb6894_c3/flp0/6832     |

|                                  |                             |                             |                             |                                  |
|----------------------------------|-----------------------------|-----------------------------|-----------------------------|----------------------------------|
| R01_cb16746_c0/flp0/1047         | NA                          | NA                          | NA                          | R01_cb16746_c0/flp0/1047         |
| R01_cb3088_c1/flp0/3724          | NA                          | R01_cb3088_c1/flp0/3724     | R01_cb3088_c1/flp0/3724     | R01_cb3088_c1/flp0/3724          |
| R01_cb644_c11/flp0/3471          | NA                          | NA                          | NA                          | R01_cb644_c11/flp0/3471          |
| R01_cb8564_c121515/flp0/238<br>2 | NA                          | NA                          | NA                          | R01_cb8564_c121515/flp0/238<br>2 |
| R01_cb10180_c2/flp0/2978         | NA                          | R01_cb10180_c2/flp0/2978    | NA                          | NA                               |
| R01_cb18456_c7372/flp0/1325      | NA                          | R01_cb18456_c7372/flp0/1325 | R01_cb18456_c7372/flp0/1325 | R01_cb18456_c7372/flp0/1325      |
| R01_cb2026_c1/flp0/4080          | NA                          | R01_cb2026_c1/flp0/4080     | R01_cb2026_c1/flp0/4080     | R01_cb2026_c1/flp0/4080          |
| R01_cb17058_c3/f5p0/502          | R01_cb17058_c3/f5p0/502     | NA                          | R01_cb17058_c3/f5p0/502     | R01_cb17058_c3/f5p0/502          |
| R01_cb8564_c20762/flp0/3469      | NA                          | NA                          | NA                          | R01_cb8564_c20762/flp0/3469      |
| R01_cb7347_c0/f2p0/2646          | R01_cb7347_c0/f2p0/2646     | R01_cb7347_c0/f2p0/2646     | R01_cb7347_c0/f2p0/2646     | R01_cb7347_c0/f2p0/2646          |
| R01_cb3398_c1/flp0/3523          | NA                          | R01_cb3398_c1/flp0/3523     | NA                          | NA                               |
| R01_cb16782_c1/flp0/503          | R01_cb16782_c1/flp0/503     | R01_cb16782_c1/flp0/503     | R01_cb16782_c1/flp0/503     | R01_cb16782_c1/flp0/503          |
| R01_cb13867_c5/f2p1/768          | NA                          | NA                          | NA                          | R01_cb13867_c5/f2p1/768          |
| R01_cb15564_c3/flp0/968          | R01_cb15564_c3/flp0/968     | R01_cb15564_c3/flp0/968     | R01_cb15564_c3/flp0/968     | R01_cb15564_c3/flp0/968          |
| R01_cb506_c9/flp0/2299           | NA                          | R01_cb506_c9/flp0/2299      | NA                          | R01_cb506_c9/flp0/2299           |
| R01_cb8564_c72426/flp0/3257<br>7 | R01_cb8564_c72426/flp0/3257 | R01_cb8564_c72426/flp0/3257 | NA                          | NA                               |
| R01_cb11752_c0/flp0/1739         | R01_cb11752_c0/flp0/1739    | R01_cb11752_c0/flp0/1739    | R01_cb11752_c0/flp0/1739    | R01_cb11752_c0/flp0/1739         |
| R01_cb9841_c2/flp0/1928          | NA                          | NA                          | NA                          | R01_cb9841_c2/flp0/1928          |
| R01_cb14744_c1/flp0/1346         | NA                          | NA                          | NA                          | R01_cb14744_c1/flp0/1346         |
| R01_cb4233_c202/flp0/2119        | NA                          | NA                          | R01_cb4233_c202/flp0/2119   | R01_cb4233_c202/flp0/2119        |
| R01_cb2719_c22/flp0/3504         | NA                          | NA                          | NA                          | R01_cb2719_c22/flp0/3504         |
| R01_cb9427_c8/flp0/1043          | NA                          | NA                          | NA                          | R01_cb9427_c8/flp0/1043          |
| R01_cb8564_c80557/flp0/3996      | NA                          | R01_cb8564_c80557/flp0/3996 | NA                          | R01_cb8564_c80557/flp0/3996      |
| R01_cb14942_c1/flp0/855          | NA                          | NA                          | NA                          | R01_cb14942_c1/flp0/855          |

|                              |                             |                              |                             |                             |
|------------------------------|-----------------------------|------------------------------|-----------------------------|-----------------------------|
| R01_cb8564_c88554/flp0/4219  | NA                          | R01_cb8564_c88554/flp0/4219  | NA                          | NA                          |
| R01_cb16341_c1/f2p0/486      | R01_cb16341_c1/f2p0/486     | R01_cb16341_c1/f2p0/486      | R01_cb16341_c1/f2p0/486     | R01_cb16341_c1/f2p0/486     |
| R01_cb8564_c25663/flp0/4167  | NA                          | R01_cb8564_c25663/flp0/4167  | NA                          | NA                          |
| R01_cb8564_c124400/flp0/2661 | NA                          | R01_cb8564_c124400/flp0/2661 | NA                          | NA                          |
| R01_cb15797_c1/flp0/1512     | NA                          | NA                           | NA                          | R01_cb15797_c1/flp0/1512    |
| R01_cb261_c19/flp0/3704      | NA                          | NA                           | NA                          | R01_cb261_c19/flp0/3704     |
| R01_cb18328_c1/flp0/554      | R01_cb18328_c1/flp0/554     | R01_cb18328_c1/flp0/554      | NA                          | R01_cb18328_c1/flp0/554     |
| R01_cb12579_c7/flp3/976      | R01_cb12579_c7/flp3/976     | R01_cb12579_c7/flp3/976      | R01_cb12579_c7/flp3/976     | R01_cb12579_c7/flp3/976     |
| R01_cb18456_c6877/flp0/848   | NA                          | R01_cb18456_c6877/flp0/848   | NA                          | NA                          |
| R01_cb5498_c0/flp0/3086      | NA                          | R01_cb5498_c0/flp0/3086      | R01_cb5498_c0/flp0/3086     | NA                          |
| R01_cb13289_c12/f5p2/1840    | NA                          | NA                           | R01_cb13289_c12/f5p2/1840   | NA                          |
| R01_cb16920_c1/flp0/642      | R01_cb16920_c1/flp0/642     | R01_cb16920_c1/flp0/642      | R01_cb16920_c1/flp0/642     | R01_cb16920_c1/flp0/642     |
| R01_cb11043_c2/flp0/2759     | NA                          | R01_cb11043_c2/flp0/2759     | NA                          | NA                          |
| R01_cb1030_c10/flp0/3270     | NA                          | R01_cb1030_c10/flp0/3270     | NA                          | NA                          |
| R01_cb15733_c1/f3p1/1136     | NA                          | R01_cb15733_c1/f3p1/1136     | NA                          | NA                          |
| R01_cb16881_c4/flp0/1593     | NA                          | NA                           | NA                          | R01_cb16881_c4/flp0/1593    |
| R01_cb5900_c97/flp0/2618     | NA                          | R01_cb5900_c97/flp0/2618     | NA                          | NA                          |
| R01_cb8564_c74806/f3p0/3981  | R01_cb8564_c74806/f3p0/3981 | R01_cb8564_c74806/f3p0/3981  | R01_cb8564_c74806/f3p0/3981 | R01_cb8564_c74806/f3p0/3981 |
| R01_cb18434_c1/flp0/1092     | NA                          | R01_cb18434_c1/flp0/1092     | NA                          | NA                          |
| R01_cb18365_c0/flp0/1179     | NA                          | R01_cb18365_c0/flp0/1179     | R01_cb18365_c0/flp0/1179    | R01_cb18365_c0/flp0/1179    |
| R01_cb2773_c10/flp0/3070     | NA                          | R01_cb2773_c10/flp0/3070     | NA                          | NA                          |
| R01_cb2536_c34/flp0/1089     | NA                          | R01_cb2536_c34/flp0/1089     | NA                          | NA                          |
| R01_cb8564_c74546/flp0/2866  | NA                          | NA                           | NA                          | R01_cb8564_c74546/flp0/2866 |
| R01_cb3218_c10/flp0/2802     | NA                          | NA                           | NA                          | R01_cb3218_c10/flp0/2802    |

|                                  |                                  |                                  |                                  |                                  |
|----------------------------------|----------------------------------|----------------------------------|----------------------------------|----------------------------------|
| R01_cb3558_c10/flp0/3091         | NA                               | NA                               | NA                               | R01_cb3558_c10/flp0/3091         |
| R01_cb13458_c2/flp0/571          | NA                               | R01_cb13458_c2/flp0/571          | NA                               | NA                               |
| R01_cb5373_c2/flp0/2829          | NA                               | NA                               | NA                               | R01_cb5373_c2/flp0/2829          |
| R01_cb11513_c1/flp0/2127         | R01_cb11513_c1/flp0/2127         | R01_cb11513_c1/flp0/2127         | NA                               | R01_cb11513_c1/flp0/2127         |
| R01_cb14069_c1/flp0/1465         | NA                               | R01_cb14069_c1/flp0/1465         | NA                               | NA                               |
| R01_cb8564_c84530/flp0/2483      | NA                               | NA                               | NA                               | R01_cb8564_c84530/flp0/2483      |
| R01_cb18409_c165/flp0/438        | R01_cb18409_c165/flp0/438        | R01_cb18409_c165/flp0/438        | R01_cb18409_c165/flp0/438        | R01_cb18409_c165/flp0/438        |
| R01_cb8564_c157987/flp6/222<br>2 | NA                               | R01_cb8564_c157987/flp6/222<br>2 | R01_cb8564_c157987/flp6/222<br>2 | R01_cb8564_c157987/flp6/222<br>2 |
| R01_cb10944_c0/f2p0/933          | NA                               | NA                               | NA                               | R01_cb10944_c0/f2p0/933          |
| R01_cb1666_c13/flp0/1804         | NA                               | NA                               | NA                               | R01_cb1666_c13/flp0/1804         |
| R01_cb7999_c6/flp0/981           | NA                               | NA                               | NA                               | R01_cb7999_c6/flp0/981           |
| R01_cb18456_c5292/flp1/835       | NA                               | R01_cb18456_c5292/flp1/835       | NA                               | NA                               |
| R01_cb18456_c7530/flp0/616       | R01_cb18456_c7530/flp0/616       | R01_cb18456_c7530/flp0/616       | R01_cb18456_c7530/flp0/616       | R01_cb18456_c7530/flp0/616       |
| R01_cb438_c5/flp0/1932           | NA                               | R01_cb438_c5/flp0/1932           | NA                               | R01_cb438_c5/flp0/1932           |
| R01_cb3791_c16/flp0/447          | NA                               | NA                               | NA                               | R01_cb3791_c16/flp0/447          |
| R01_cb10233_c2/flp0/1932         | NA                               | R01_cb10233_c2/flp0/1932         | NA                               | NA                               |
| R01_cb16192_c1/f4p1/1266         | NA                               | NA                               | NA                               | R01_cb16192_c1/f4p1/1266         |
| R01_cb952_c0/flp0/4548           | R01_cb952_c0/flp0/4548           | R01_cb952_c0/flp0/4548           | R01_cb952_c0/flp0/4548           | R01_cb952_c0/flp0/4548           |
| R01_cb5569_c2/flp0/949           | NA                               | R01_cb5569_c2/flp0/949           | NA                               | NA                               |
| R01_cb5120_c2/flp0/1874          | NA                               | NA                               | NA                               | R01_cb5120_c2/flp0/1874          |
| R01_cb8564_c13899/flp0/1939      | R01_cb8564_c13899/flp0/1939<br>9 | R01_cb8564_c13899/flp0/1939      | NA                               | NA                               |
| R01_cb2367_c4/flp0/1959          | NA                               | R01_cb2367_c4/flp0/1959          | R01_cb2367_c4/flp0/1959          | NA                               |
| R01_cb15432_c2/flp0/797          | NA                               | R01_cb15432_c2/flp0/797          | NA                               | NA                               |
| R01_cb8564_c84992/flp0/3087      | NA                               | R01_cb8564_c84992/flp0/3087      | NA                               | NA                               |



|                             |                             |                             |                             |                             |
|-----------------------------|-----------------------------|-----------------------------|-----------------------------|-----------------------------|
| R01_cb9448_c16/flp0/1145    | NA                          | NA                          | NA                          | R01_cb9448_c16/flp0/1145    |
| R01_cb10238_c3/flp0/830     | NA                          | R01_cb10238_c3/flp0/830     | R01_cb10238_c3/flp0/830     | R01_cb10238_c3/flp0/830     |
| R01_cb8564_c15273/flp0/2696 | NA                          | R01_cb8564_c15273/flp0/2696 | NA                          | NA                          |
| R01_cb14166_c4/flp0/451     | R01_cb14166_c4/flp0/451     | NA                          | R01_cb14166_c4/flp0/451     | R01_cb14166_c4/flp0/451     |
| R01_cb8265_c0/flp0/2422     | NA                          | NA                          | NA                          | R01_cb8265_c0/flp0/2422     |
| R01_cb11410_c3/flp0/2577    | R01_cb11410_c3/flp0/2577    | R01_cb11410_c3/flp0/2577    | NA                          | NA                          |
| R01_cb12039_c2/f7p0/402     | NA                          | R01_cb12039_c2/f7p0/402     | R01_cb12039_c2/f7p0/402     | R01_cb12039_c2/f7p0/402     |
| R01_cb2674_c33/flp0/1972    | NA                          | NA                          | R01_cb2674_c33/flp0/1972    | R01_cb2674_c33/flp0/1972    |
| R01_cb12154_c3/flp0/853     | NA                          | R01_cb12154_c3/flp0/853     | NA                          | R01_cb12154_c3/flp0/853     |
| R01_cb13933_c7/flp0/1621    | NA                          | R01_cb13933_c7/flp0/1621    | NA                          | NA                          |
| R01_cb8239_c0/f3p0/2354     | NA                          | NA                          | NA                          | R01_cb8239_c0/f3p0/2354     |
| R01_cb18456_c3304/flp0/975  | NA                          | R01_cb18456_c3304/flp0/975  | NA                          | NA                          |
| R01_cb18590_c0/flp0/1553    | NA                          | R01_cb18590_c0/flp0/1553    | NA                          | NA                          |
| R01_cb8564_c91202/flp0/3276 | R01_cb8564_c91202/flp0/3276 | R01_cb8564_c91202/flp0/3276 | R01_cb8564_c91202/flp0/3276 | R01_cb8564_c91202/flp0/3276 |
| R01_cb7334_c4/flp0/2579     | NA                          | NA                          | NA                          | R01_cb7334_c4/flp0/2579     |
| R01_cb1336_c0/f2p0/1399     | NA                          | NA                          | NA                          | R01_cb1336_c0/f2p0/1399     |
| R01_cb10250_c5/flp0/3153    | NA                          | R01_cb10250_c5/flp0/3153    | NA                          | NA                          |
| R01_cb4861_c3/flp0/2723     | R01_cb4861_c3/flp0/2723     | R01_cb4861_c3/flp0/2723     | NA                          | R01_cb4861_c3/flp0/2723     |
| R01_cb10383_c0/flp0/482     | NA                          | NA                          | R01_cb10383_c0/flp0/482     | R01_cb10383_c0/flp0/482     |
| R01_cb17097_c1/flp0/864     | NA                          | NA                          | NA                          | R01_cb17097_c1/flp0/864     |
| R01_cb7214_c5/flp0/1888     | NA                          | NA                          | NA                          | R01_cb7214_c5/flp0/1888     |
| R01_cb9378_c18/flp0/329     | R01_cb9378_c18/flp0/329     | R01_cb9378_c18/flp0/329     | R01_cb9378_c18/flp0/329     | R01_cb9378_c18/flp0/329     |
| R01_cb8122_c9/flp0/620      | R01_cb8122_c9/flp0/620      | R01_cb8122_c9/flp0/620      | R01_cb8122_c9/flp0/620      | R01_cb8122_c9/flp0/620      |
| R01_cb8564_c110738/flp0/222 | R01_cb8564_c110738/flp0/222 | R01_cb8564_c110738/flp0/222 | R01_cb8564_c110738/flp0/222 | R01_cb8564_c110738/flp0/222 |
| 2                           | 22                          | 2                           | 2                           | 2                           |

|                              |                            |                              |                              |                              |
|------------------------------|----------------------------|------------------------------|------------------------------|------------------------------|
| R01_cb2679_c2/f1p0/3844      | NA                         | R01_cb2679_c2/f1p0/3844      | NA                           | NA                           |
| R01_cb104_c21/f1p0/1517      | NA                         | NA                           | NA                           | R01_cb104_c21/f1p0/1517      |
| R01_cb8564_c109844/f2p0/3619 | NA                         | R01_cb8564_c109844/f2p0/3619 | NA                           | NA                           |
| R01_cb5139_c24/f1p1/1064     | NA                         | R01_cb5139_c24/f1p1/1064     | R01_cb5139_c24/f1p1/1064     | R01_cb5139_c24/f1p1/1064     |
| R01_cb2718_c12/f1p0/3521     | NA                         | R01_cb2718_c12/f1p0/3521     | NA                           | NA                           |
| R01_cb8564_c4969/f1p0/2987   | R01_cb8564_c4969/f1p0/2987 | R01_cb8564_c4969/f1p0/2987   | R01_cb8564_c4969/f1p0/2987   | R01_cb8564_c4969/f1p0/2987   |
| R01_cb13601_c0/f2p0/803      | NA                         | NA                           | NA                           | R01_cb13601_c0/f2p0/803      |
| R01_cb16972_c2/f1p0/1858     | NA                         | NA                           | NA                           | R01_cb16972_c2/f1p0/1858     |
| R01_cb18300_c2/f1p0/876      | NA                         | NA                           | NA                           | R01_cb18300_c2/f1p0/876      |
| R01_cb7222_c9/f2p0/2183      | NA                         | R01_cb7222_c9/f2p0/2183      | NA                           | R01_cb7222_c9/f2p0/2183      |
| R01_cb8564_c78285/f1p0/3648  | NA                         | R01_cb8564_c78285/f1p0/3648  | NA                           | R01_cb8564_c78285/f1p0/3648  |
| R01_cb6197_c1/f1p0/828       | NA                         | R01_cb6197_c1/f1p0/828       | NA                           | NA                           |
| R01_cb8564_c9475/f1p0/2144   | NA                         | R01_cb8564_c9475/f1p0/2144   | NA                           | R01_cb8564_c9475/f1p0/2144   |
| R01_cb17076_c2/f1p0/572      | R01_cb17076_c2/f1p0/572    | NA                           | NA                           | R01_cb17076_c2/f1p0/572      |
| R01_cb10764_c8/f1p0/1323     | R01_cb10764_c8/f1p0/1323   | R01_cb10764_c8/f1p0/1323     | NA                           | NA                           |
| R01_cb17562_c4/f1p0/589      | NA                         | R01_cb17562_c4/f1p0/589      | NA                           | NA                           |
| R01_cb11129_c0/f1p0/1587     | R01_cb11129_c0/f1p0/1587   | R01_cb11129_c0/f1p0/1587     | NA                           | R01_cb11129_c0/f1p0/1587     |
| R01_cb16705_c1/f1p0/629      | NA                         | R01_cb16705_c1/f1p0/629      | NA                           | R01_cb16705_c1/f1p0/629      |
| R01_cb8564_c123192/f1p0/1931 | NA                         | R01_cb8564_c123192/f1p0/1931 | R01_cb8564_c123192/f1p0/1931 | R01_cb8564_c123192/f1p0/1931 |
| R01_cb8564_c14764/f1p0/4059  | NA                         | R01_cb8564_c14764/f1p0/4059  | NA                           | NA                           |
| R01_cb17522_c2/f1p0/6609     | NA                         | NA                           | NA                           | R01_cb17522_c2/f1p0/6609     |
| R01_cb5221_c19/f1p0/3839     | NA                         | NA                           | NA                           | R01_cb5221_c19/f1p0/3839     |
| R01_cb18456_c2280/f1p0/763   | NA                         | R01_cb18456_c2280/f1p0/763   | NA                           | R01_cb18456_c2280/f1p0/763   |
| R01_cb8564_c127660/f1p1/227  | NA                         | NA                           | NA                           | R01_cb8564_c127660/f1p1/227  |

|                              |                              |                              |                              |                              |
|------------------------------|------------------------------|------------------------------|------------------------------|------------------------------|
| 4                            |                              |                              |                              | 4                            |
| R01_cb7356_c4/flp1/2638      | NA                           | NA                           | NA                           | R01_cb7356_c4/flp1/2638      |
| R01_cb10192_c10/flp0/1303    | NA                           | NA                           | NA                           | R01_cb10192_c10/flp0/1303    |
| R01_cb12369_c8/flp1/677      | NA                           | NA                           | R01_cb12369_c8/flp1/677      | NA                           |
| R01_cb8564_c41631/flp0/2140  | NA                           | R01_cb8564_c41631/flp0/2140  | R01_cb8564_c41631/flp0/2140  | R01_cb8564_c41631/flp0/2140  |
| R01_cb8564_c48619/flp0/4132  | R01_cb8564_c48619/flp0/4132  | R01_cb8564_c48619/flp0/4132  | NA                           | R01_cb8564_c48619/flp0/4132  |
| R01_cb8564_c124765/flp0/1997 | NA                           | R01_cb8564_c124765/flp0/1997 | R01_cb8564_c124765/flp0/1997 | R01_cb8564_c124765/flp0/1997 |
| R01_cb3124_c4/flp0/1921      | NA                           | R01_cb3124_c4/flp0/1921      | R01_cb3124_c4/flp0/1921      | R01_cb3124_c4/flp0/1921      |
| R01_cb8564_c16122/flp0/3280  | NA                           | R01_cb8564_c16122/flp0/3280  | R01_cb8564_c16122/flp0/3280  | R01_cb8564_c16122/flp0/3280  |
| R01_cb4469_c6/flp0/2503      | NA                           | NA                           | NA                           | R01_cb4469_c6/flp0/2503      |
| R01_cb17973_c26/flp0/742     | NA                           | R01_cb17973_c26/flp0/742     | R01_cb17973_c26/flp0/742     | NA                           |
| R01_cb13289_c6/f2p2/1685     | NA                           | NA                           | R01_cb13289_c6/f2p2/1685     | NA                           |
| R01_cb8564_c120674/flp0/3586 | R01_cb8564_c120674/flp0/3586 | R01_cb8564_c120674/flp0/3586 | R01_cb8564_c120674/flp0/3586 | R01_cb8564_c120674/flp0/3586 |
| R01_cb14657_c3/flp0/1824     | R01_cb14657_c3/flp0/1824     | R01_cb14657_c3/flp0/1824     | R01_cb14657_c3/flp0/1824     | R01_cb14657_c3/flp0/1824     |
| R01_cb279_c12/flp1/4491      | NA                           | NA                           | NA                           | R01_cb279_c12/flp1/4491      |
| R01_cb18456_c5105/flp0/481   | R01_cb18456_c5105/flp0/481   | R01_cb18456_c5105/flp0/481   | NA                           | R01_cb18456_c5105/flp0/481   |
| R01_cb18386_c9/flp0/1249     | NA                           | R01_cb18386_c9/flp0/1249     | NA                           | R01_cb18386_c9/flp0/1249     |
| R01_cb3213_c31/flp0/649      | R01_cb3213_c31/flp0/649      | R01_cb3213_c31/flp0/649      | R01_cb3213_c31/flp0/649      | R01_cb3213_c31/flp0/649      |
| R01_cb17345_c1/flp0/494      | R01_cb17345_c1/flp0/494      | R01_cb17345_c1/flp0/494      | R01_cb17345_c1/flp0/494      | R01_cb17345_c1/flp0/494      |
| R01_cb8564_c20404/flp3/3974  | NA                           | NA                           | NA                           | R01_cb8564_c20404/flp3/3974  |
| R01_cb8564_c16226/flp0/3424  | NA                           | R01_cb8564_c16226/flp0/3424  | NA                           | NA                           |
| R01_cb48_c1/flp3/4991        | NA                           | NA                           | NA                           | R01_cb48_c1/flp3/4991        |
| R01_cb8564_c19108/flp0/2604  | NA                           | R01_cb8564_c19108/flp0/2604  | NA                           | R01_cb8564_c19108/flp0/2604  |

|                             |                         |                             |                          |                             |
|-----------------------------|-------------------------|-----------------------------|--------------------------|-----------------------------|
| R01_cb1398_c12/flp0/2711    | NA                      | R01_cb1398_c12/flp0/2711    | R01_cb1398_c12/flp0/2711 | NA                          |
| R01_cb8407_c0/f8p0/1219     | NA                      | NA                          | NA                       | R01_cb8407_c0/f8p0/1219     |
| R01_cb12154_c4/flp0/407     | R01_cb12154_c4/flp0/407 | R01_cb12154_c4/flp0/407     | NA                       | R01_cb12154_c4/flp0/407     |
| R01_cb12775_c3/flp2/1319    | NA                      | NA                          | NA                       | R01_cb12775_c3/flp2/1319    |
| R01_cb3074_c1/flp0/2352     | NA                      | NA                          | NA                       | R01_cb3074_c1/flp0/2352     |
| R01_cb3558_c5/flp2/2851     | NA                      | NA                          | NA                       | R01_cb3558_c5/flp2/2851     |
| R01_cb18456_c5183/flp2/640  | NA                      | NA                          | NA                       | R01_cb18456_c5183/flp2/640  |
| R01_cb9359_c0/flp0/2116     | NA                      | NA                          | NA                       | R01_cb9359_c0/flp0/2116     |
| R01_cb15630_c3/flp0/1818    | NA                      | R01_cb15630_c3/flp0/1818    | R01_cb15630_c3/flp0/1818 | R01_cb15630_c3/flp0/1818    |
| R01_cb18456_c5767/flp0/1871 | NA                      | R01_cb18456_c5767/flp0/1871 | NA                       | R01_cb18456_c5767/flp0/1871 |
| R01_cb17183_c7/f8p1/670     | NA                      | NA                          | NA                       | R01_cb17183_c7/f8p1/670     |
| R01_cb12620_c8/flp0/1180    | NA                      | NA                          | NA                       | R01_cb12620_c8/flp0/1180    |
| R01_cb13955_c2/f2p0/572     | NA                      | NA                          | NA                       | R01_cb13955_c2/f2p0/572     |
| R01_cb15334_c2/flp0/371     | R01_cb15334_c2/flp0/371 | R01_cb15334_c2/flp0/371     | R01_cb15334_c2/flp0/371  | R01_cb15334_c2/flp0/371     |
| R01_cb9062_c1/flp0/2200     | NA                      | R01_cb9062_c1/flp0/2200     | NA                       | R01_cb9062_c1/flp0/2200     |
| R01_cb16055_c0/flp0/385     | NA                      | R01_cb16055_c0/flp0/385     | NA                       | R01_cb16055_c0/flp0/385     |
| R01_cb10086_c8/fl14p2/1399  | NA                      | NA                          | NA                       | R01_cb10086_c8/fl14p2/1399  |
| R01_cb8407_c3/flp0/2387     | R01_cb8407_c3/flp0/2387 | R01_cb8407_c3/flp0/2387     | R01_cb8407_c3/flp0/2387  | R01_cb8407_c3/flp0/2387     |
| R01_cb13025_c4/f2p0/1450    | NA                      | NA                          | NA                       | R01_cb13025_c4/f2p0/1450    |
| R01_cb2625_c17/flp0/1136    | NA                      | R01_cb2625_c17/flp0/1136    | NA                       | NA                          |
| R01_cb16797_c0/f2p0/442     | NA                      | NA                          | NA                       | R01_cb16797_c0/f2p0/442     |
| R01_cb5782_c10/flp0/2925    | NA                      | NA                          | NA                       | R01_cb5782_c10/flp0/2925    |
| R01_cb16465_c1/flp0/879     | NA                      | NA                          | NA                       | R01_cb16465_c1/flp0/879     |
| R01_cb13234_c1/flp0/542     | NA                      | R01_cb13234_c1/flp0/542     | R01_cb13234_c1/flp0/542  | NA                          |
| R01_cb8564_c73173/flp0/3891 | NA                      | R01_cb8564_c73173/flp0/3891 | NA                       | NA                          |
| R01_cb8564_c110045/f2p1/220 | NA                      | R01_cb8564_c110045/f2p1/220 | NA                       | NA                          |

|                             |                             |                             |                             |                             |
|-----------------------------|-----------------------------|-----------------------------|-----------------------------|-----------------------------|
| 1                           |                             | 1                           |                             |                             |
| R01_cb13428_c15/flp0/619    | NA                          | R01_cb13428_c15/flp0/619    | NA                          | R01_cb13428_c15/flp0/619    |
| R01_cb16884_c0/f2p0/335     | R01_cb16884_c0/f2p0/335     | R01_cb16884_c0/f2p0/335     | R01_cb16884_c0/f2p0/335     | R01_cb16884_c0/f2p0/335     |
| R01_cb8564_c69132/f2p0/2211 | NA                          | R01_cb8564_c69132/f2p0/2211 | R01_cb8564_c69132/f2p0/2211 | R01_cb8564_c69132/f2p0/2211 |
| R01_cb15595_c2/flp0/696     | NA                          | NA                          | NA                          | R01_cb15595_c2/flp0/696     |
| R01_cb13761_c10/flp0/1253   | R01_cb13761_c10/flp0/1253   | R01_cb13761_c10/flp0/1253   | R01_cb13761_c10/flp0/1253   | R01_cb13761_c10/flp0/1253   |
| R01_cb3787_c3/flp0/1921     | NA                          | R01_cb3787_c3/flp0/1921     | NA                          | NA                          |
| R01_cb14783_c1/flp0/505     | R01_cb14783_c1/flp0/505     | R01_cb14783_c1/flp0/505     | R01_cb14783_c1/flp0/505     | R01_cb14783_c1/flp0/505     |
| R01_cb5896_c18/f2p0/1997    | NA                          | NA                          | NA                          | R01_cb5896_c18/f2p0/1997    |
| R01_cb8564_c13774/flp0/2253 | R01_cb8564_c13774/flp0/2253 | R01_cb8564_c13774/flp0/2253 | R01_cb8564_c13774/flp0/2253 | R01_cb8564_c13774/flp0/2253 |
| R01_cb7927_c0/flp0/2499     | NA                          | R01_cb7927_c0/flp0/2499     | R01_cb7927_c0/flp0/2499     | R01_cb7927_c0/flp0/2499     |
| R01_cb18426_c1/flp0/1174    | R01_cb18426_c1/flp0/1174    | R01_cb18426_c1/flp0/1174    | R01_cb18426_c1/flp0/1174    | R01_cb18426_c1/flp0/1174    |
| R01_cb15346_c7/flp0/874     | NA                          | R01_cb15346_c7/flp0/874     | R01_cb15346_c7/flp0/874     | R01_cb15346_c7/flp0/874     |
| R01_cb7348_c15/flp0/1656    | NA                          | R01_cb7348_c15/flp0/1656    | NA                          | NA                          |
| R01_cb3218_c7/flp0/2559     | NA                          | NA                          | NA                          | R01_cb3218_c7/flp0/2559     |
| R01_cb16076_c1/f2p0/746     | NA                          | NA                          | R01_cb16076_c1/f2p0/746     | R01_cb16076_c1/f2p0/746     |
| R01_cb8564_c21233/f2p0/3428 | NA                          | NA                          | NA                          | R01_cb8564_c21233/f2p0/3428 |
| R01_cb3243_c1/flp0/3684     | NA                          | NA                          | NA                          | R01_cb3243_c1/flp0/3684     |
| R01_cb13743_c4/flp1/1447    | NA                          | NA                          | NA                          | R01_cb13743_c4/flp1/1447    |
| R01_cb16993_c0/flp0/1589    | NA                          | NA                          | R01_cb16993_c0/flp0/1589    | NA                          |
| R01_cb18223_c20/flp1/997    | R01_cb18223_c20/flp1/997    | R01_cb18223_c20/flp1/997    | R01_cb18223_c20/flp1/997    | R01_cb18223_c20/flp1/997    |
| R01_cb3339_c13/flp0/486     | R01_cb3339_c13/flp0/486     | R01_cb3339_c13/flp0/486     | R01_cb3339_c13/flp0/486     | R01_cb3339_c13/flp0/486     |
| R01_cb10555_c5/flp0/3929    | NA                          | R01_cb10555_c5/flp0/3929    | NA                          | NA                          |
| R01_cb8564_c73244/flp0/2654 | NA                          | NA                          | NA                          | R01_cb8564_c73244/flp0/2654 |
| R01_cb8564_c4614/flp2/2942  | NA                          | R01_cb8564_c4614/flp2/2942  | R01_cb8564_c4614/flp2/2942  | R01_cb8564_c4614/flp2/2942  |

|                             |                             |                             |                             |                             |
|-----------------------------|-----------------------------|-----------------------------|-----------------------------|-----------------------------|
| R01_cb5117_c1/f1p0/3980     | NA                          | NA                          | NA                          | R01_cb5117_c1/f1p0/3980     |
| R01_cb6113_c3/f1p0/2938     | NA                          | NA                          | NA                          | R01_cb6113_c3/f1p0/2938     |
| R01_cb8564_c5042/f2p1/3154  | NA                          | NA                          | NA                          | R01_cb8564_c5042/f2p1/3154  |
| R01_cb14542_c2/f1p0/1220    | NA                          | NA                          | NA                          | R01_cb14542_c2/f1p0/1220    |
| R01_cb4702_c25/f1p0/1095    | NA                          | NA                          | NA                          | R01_cb4702_c25/f1p0/1095    |
| R01_cb14540_c7/f1p1/1690    | NA                          | R01_cb14540_c7/f1p1/1690    | NA                          | NA                          |
| R01_cb9608_c5/f1p0/2097     | NA                          | NA                          | NA                          | R01_cb9608_c5/f1p0/2097     |
| R01_cb6615_c15/f1p0/2361    | NA                          | NA                          | R01_cb6615_c15/f1p0/2361    | R01_cb6615_c15/f1p0/2361    |
| R01_cb11370_c3/f1p0/1229    | NA                          | NA                          | NA                          | R01_cb11370_c3/f1p0/1229    |
| R01_cb5832_c0/f2p0/2622     | R01_cb5832_c0/f2p0/2622     | R01_cb5832_c0/f2p0/2622     | R01_cb5832_c0/f2p0/2622     | R01_cb5832_c0/f2p0/2622     |
| R01_cb17589_c3/f1p0/1321    | NA                          | NA                          | NA                          | R01_cb17589_c3/f1p0/1321    |
| R01_cb18456_c4775/f1p0/481  | R01_cb18456_c4775/f1p0/481  | NA                          | NA                          | R01_cb18456_c4775/f1p0/481  |
| R01_cb18337_c1/f1p0/731     | R01_cb18337_c1/f1p0/731     | R01_cb18337_c1/f1p0/731     | R01_cb18337_c1/f1p0/731     | R01_cb18337_c1/f1p0/731     |
| R01_cb1758_c6/f1p0/2223     | NA                          | NA                          | NA                          | R01_cb1758_c6/f1p0/2223     |
| R01_cb5657_c5/f1p0/2202     | NA                          | NA                          | NA                          | R01_cb5657_c5/f1p0/2202     |
| R01_cb11848_c5/f6p0/837     | R01_cb11848_c5/f6p0/837     | R01_cb11848_c5/f6p0/837     | R01_cb11848_c5/f6p0/837     | R01_cb11848_c5/f6p0/837     |
| R01_cb8564_c18668/f1p0/2122 | R01_cb8564_c18668/f1p0/2122 | R01_cb8564_c18668/f1p0/2122 | R01_cb8564_c18668/f1p0/2122 | R01_cb8564_c18668/f1p0/2122 |
| R01_cb6158_c0/f1p0/2915     | NA                          | R01_cb6158_c0/f1p0/2915     | NA                          | R01_cb6158_c0/f1p0/2915     |
| R01_cb17604_c2/f3p0/630     | NA                          | R01_cb17604_c2/f3p0/630     | R01_cb17604_c2/f3p0/630     | R01_cb17604_c2/f3p0/630     |
| R01_cb2253_c1/f2p0/3998     | NA                          | R01_cb2253_c1/f2p0/3998     | NA                          | NA                          |
| R01_cb13781_c12/f5p0/592    | NA                          | NA                          | NA                          | R01_cb13781_c12/f5p0/592    |
| R01_cb10390_c5/f2p1/1345    | NA                          | R01_cb10390_c5/f2p1/1345    | NA                          | NA                          |
| R01_cb8564_c89781/f1p0/2441 | NA                          | R01_cb8564_c89781/f1p0/2441 | NA                          | R01_cb8564_c89781/f1p0/2441 |
| R01_cb8039_c1/f1p0/2579     | NA                          | R01_cb8039_c1/f1p0/2579     | NA                          | NA                          |
| R01_cb15823_c0/f8p0/733     | R01_cb15823_c0/f8p0/733     | NA                          | NA                          | NA                          |

|                             |                           |                             |                             |                             |
|-----------------------------|---------------------------|-----------------------------|-----------------------------|-----------------------------|
| R01_cb8564_c1438/flp0/2329  | NA                        | R01_cb8564_c1438/flp0/2329  | NA                          | R01_cb8564_c1438/flp0/2329  |
| R01_cb17977_c1/flp0/751     | NA                        | R01_cb17977_c1/flp0/751     | R01_cb17977_c1/flp0/751     | NA                          |
| R01_cb8564_c12717/flp0/4583 | NA                        | R01_cb8564_c12717/flp0/4583 | R01_cb8564_c12717/flp0/4583 | NA                          |
| R01_cb8564_c19209/f2p0/3017 | NA                        | R01_cb8564_c19209/f2p0/3017 | NA                          | R01_cb8564_c19209/f2p0/3017 |
| R01_cb16645_c29/flp0/1190   | NA                        | R01_cb16645_c29/flp0/1190   | R01_cb16645_c29/flp0/1190   | R01_cb16645_c29/flp0/1190   |
| R01_cb12912_c6/flp0/1393    | NA                        | R01_cb12912_c6/flp0/1393    | NA                          | R01_cb12912_c6/flp0/1393    |
| R01_cb3483_c25/f6p1/2943    | NA                        | NA                          | NA                          | R01_cb3483_c25/f6p1/2943    |
| R01_cb1626_c21/f5p1/2846    | NA                        | NA                          | NA                          | R01_cb1626_c21/f5p1/2846    |
| R01_cb6345_c2/flp1/2613     | NA                        | R01_cb6345_c2/flp1/2613     | R01_cb6345_c2/flp1/2613     | R01_cb6345_c2/flp1/2613     |
| R01_cb15045_c2/f2p0/1307    | NA                        | NA                          | NA                          | R01_cb15045_c2/f2p0/1307    |
| R01_cb17371_c1/flp0/688     | NA                        | R01_cb17371_c1/flp0/688     | R01_cb17371_c1/flp0/688     | R01_cb17371_c1/flp0/688     |
| R01_cb18409_c112/flp0/411   | R01_cb18409_c112/flp0/411 | R01_cb18409_c112/flp0/411   | R01_cb18409_c112/flp0/411   | R01_cb18409_c112/flp0/411   |
| R01_cb15784_c2/flp0/1655    | NA                        | NA                          | NA                          | R01_cb15784_c2/flp0/1655    |
| R01_cb13430_c2/flp0/1246    | NA                        | NA                          | NA                          | R01_cb13430_c2/flp0/1246    |
| R01_cb4491_c2/flp1/3300     | NA                        | R01_cb4491_c2/flp1/3300     | NA                          | NA                          |
| R01_cb8564_c79549/flp0/2853 | NA                        | R01_cb8564_c79549/flp0/2853 | R01_cb8564_c79549/flp0/2853 | NA                          |
| R01_cb2048_c17/flp0/1983    | NA                        | NA                          | NA                          | R01_cb2048_c17/flp0/1983    |
| R01_cb8335_c17/f3p0/2378    | NA                        | NA                          | NA                          | R01_cb8335_c17/f3p0/2378    |
| R01_cb8564_c17723/flp0/2448 | NA                        | R01_cb8564_c17723/flp0/2448 | R01_cb8564_c17723/flp0/2448 | NA                          |
| R01_cb12024_c14/flp0/953    | NA                        | R01_cb12024_c14/flp0/953    | NA                          | R01_cb12024_c14/flp0/953    |
| R01_cb14307_c5/flp0/6345    | NA                        | R01_cb14307_c5/flp0/6345    | NA                          | NA                          |
| R01_cb3363_c3/flp0/2627     | NA                        | R01_cb3363_c3/flp0/2627     | NA                          | NA                          |
| R01_cb5850_c0/flp0/3001     | NA                        | R01_cb5850_c0/flp0/3001     | R01_cb5850_c0/flp0/3001     | R01_cb5850_c0/flp0/3001     |
| R01_cb843_c3/flp0/3210      | NA                        | NA                          | NA                          | R01_cb843_c3/flp0/3210      |
| R01_cb8564_c78970/flp0/2778 | NA                        | R01_cb8564_c78970/flp0/2778 | R01_cb8564_c78970/flp0/2778 | NA                          |
| R01_cb8564_c46566/flp0/2996 | NA                        | R01_cb8564_c46566/flp0/2996 | NA                          | R01_cb8564_c46566/flp0/2996 |

|                              |                             |                             |                             |                              |
|------------------------------|-----------------------------|-----------------------------|-----------------------------|------------------------------|
| R01_cb5847_c8/f1p0/2313      | NA                          | NA                          | NA                          | R01_cb5847_c8/f1p0/2313      |
| R01_cb8564_c14653/f1p0/4755  | NA                          | R01_cb8564_c14653/f1p0/4755 | R01_cb8564_c14653/f1p0/4755 | R01_cb8564_c14653/f1p0/4755  |
| R01_cb8564_c70447/f1p0/1903  | NA                          | R01_cb8564_c70447/f1p0/1903 | R01_cb8564_c70447/f1p0/1903 | NA                           |
| R01_cb18121_c0/f2p0/1674     | NA                          | NA                          | NA                          | R01_cb18121_c0/f2p0/1674     |
| R01_cb6147_c34/f1p0/2786     | NA                          | R01_cb6147_c34/f1p0/2786    | NA                          | NA                           |
| R01_cb11539_c1/f1p0/1903     | NA                          | NA                          | NA                          | R01_cb11539_c1/f1p0/1903     |
| R01_cb13396_c5/f1p0/1269     | NA                          | R01_cb13396_c5/f1p0/1269    | R01_cb13396_c5/f1p0/1269    | R01_cb13396_c5/f1p0/1269     |
| R01_cb1849_c16/f1p1/2012     | NA                          | NA                          | NA                          | R01_cb1849_c16/f1p1/2012     |
| R01_cb2570_c15/f2p1/2439     | NA                          | NA                          | NA                          | R01_cb2570_c15/f2p1/2439     |
| R01_cb8564_c12583/f1p0/4273  | NA                          | NA                          | NA                          | R01_cb8564_c12583/f1p0/4273  |
| R01_cb4960_c2/f1p0/4400      | NA                          | R01_cb4960_c2/f1p0/4400     | R01_cb4960_c2/f1p0/4400     | R01_cb4960_c2/f1p0/4400      |
| R01_cb16992_c5/f1p0/751      | NA                          | R01_cb16992_c5/f1p0/751     | NA                          | NA                           |
| R01_cb14781_c2/f1p0/1665     | NA                          | R01_cb14781_c2/f1p0/1665    | NA                          | NA                           |
| R01_cb8564_c10491/f1p0/1993  | NA                          | R01_cb8564_c10491/f1p0/1993 | NA                          | R01_cb8564_c10491/f1p0/1993  |
| R01_cb6272_c7/f1p1/1942      | NA                          | NA                          | NA                          | R01_cb6272_c7/f1p1/1942      |
| R01_cb16062_c0/f7p0/697      | NA                          | R01_cb16062_c0/f7p0/697     | NA                          | NA                           |
| R01_cb8944_c2/f1p0/1807      | R01_cb8944_c2/f1p0/1807     | R01_cb8944_c2/f1p0/1807     | NA                          | NA                           |
| R01_cb16526_c8/f1p0/1473     | NA                          | R01_cb16526_c8/f1p0/1473    | NA                          | NA                           |
| R01_cb8564_c71836/f1p0/2272  | R01_cb8564_c71836/f1p0/2272 | R01_cb8564_c71836/f1p0/2272 | R01_cb8564_c71836/f1p0/2272 | NA                           |
| R01_cb2894_c13/f1p0/358      | R01_cb2894_c13/f1p0/358     | R01_cb2894_c13/f1p0/358     | R01_cb2894_c13/f1p0/358     | NA                           |
| R01_cb8564_c117197/f1p0/2207 | NA                          | NA                          | NA                          | R01_cb8564_c117197/f1p0/2207 |
| R01_cb7663_c7/f2p0/1035      | NA                          | NA                          | NA                          | R01_cb7663_c7/f2p0/1035      |
| R01_cb12639_c0/f2p0/778      | NA                          | R01_cb12639_c0/f2p0/778     | NA                          | NA                           |
| R01_cb6495_c30/f1p0/588      | NA                          | R01_cb6495_c30/f1p0/588     | NA                          | R01_cb6495_c30/f1p0/588      |



|                              |                            |                             |                           |                              |
|------------------------------|----------------------------|-----------------------------|---------------------------|------------------------------|
| R01_cb14186_c1/flp0/977      | NA                         | R01_cb14186_c1/flp0/977     | NA                        | NA                           |
| R01_cb9368_c5/flp0/1264      | NA                         | NA                          | NA                        | R01_cb9368_c5/flp0/1264      |
| R01_cb3531_c18/flp0/2707     | NA                         | R01_cb3531_c18/flp0/2707    | NA                        | NA                           |
| R01_cb18456_c6290/flp0/631   | R01_cb18456_c6290/flp0/631 | R01_cb18456_c6290/flp0/631  | NA                        | R01_cb18456_c6290/flp0/631   |
| R01_cb18765_c0/flp0/5283     | NA                         | R01_cb18765_c0/flp0/5283    | NA                        | NA                           |
| R01_cb3483_c6/flp0/3047      | NA                         | NA                          | NA                        | R01_cb3483_c6/flp0/3047      |
| R01_cb14709_c1/flp0/1436     | NA                         | R01_cb14709_c1/flp0/1436    | NA                        | NA                           |
| R01_cb14566_c0/f3p0/627      | R01_cb14566_c0/f3p0/627    | R01_cb14566_c0/f3p0/627     | R01_cb14566_c0/f3p0/627   | R01_cb14566_c0/f3p0/627      |
| R01_cb1788_c4/flp0/3161      | NA                         | NA                          | NA                        | R01_cb1788_c4/flp0/3161      |
| R01_cb2845_c13/flp1/3510     | NA                         | NA                          | NA                        | R01_cb2845_c13/flp1/3510     |
| R01_cb18745_c1/flp0/513      | R01_cb18745_c1/flp0/513    | NA                          | R01_cb18745_c1/flp0/513   | R01_cb18745_c1/flp0/513      |
| R01_cb2026_c0/f2p0/3902      | R01_cb2026_c0/f2p0/3902    | R01_cb2026_c0/f2p0/3902     | R01_cb2026_c0/f2p0/3902   | R01_cb2026_c0/f2p0/3902      |
| R01_cb8564_c17747/flp0/3700  | NA                         | R01_cb8564_c17747/flp0/3700 | NA                        | NA                           |
| R01_cb5331_c1/flp0/739       | R01_cb5331_c1/flp0/739     | R01_cb5331_c1/flp0/739      | R01_cb5331_c1/flp0/739    | R01_cb5331_c1/flp0/739       |
| R01_cb11141_c8/flp0/742      | NA                         | NA                          | NA                        | R01_cb11141_c8/flp0/742      |
| R01_cb18456_c6850/flp0/994   | R01_cb18456_c6850/flp0/994 | R01_cb18456_c6850/flp0/994  | NA                        | NA                           |
| R01_cb2844_c1/flp0/2387      | NA                         | NA                          | NA                        | R01_cb2844_c1/flp0/2387      |
| R01_cb8564_c83840/flp0/2061  | NA                         | NA                          | NA                        | R01_cb8564_c83840/flp0/2061  |
| R01_cb8564_c131632/f2p0/2188 | NA                         | NA                          | NA                        | R01_cb8564_c131632/f2p0/2188 |
| R01_cb10228_c6/flp1/817      | NA                         | R01_cb10228_c6/flp1/817     | R01_cb10228_c6/flp1/817   | R01_cb10228_c6/flp1/817      |
| R01_cb2803_c7/flp0/4315      | NA                         | R01_cb2803_c7/flp0/4315     | NA                        | NA                           |
| R01_cb10024_c195/flp0/624    | NA                         | NA                          | R01_cb10024_c195/flp0/624 | NA                           |
| R01_cb11354_c0/f2p0/1773     | NA                         | NA                          | NA                        | R01_cb11354_c0/f2p0/1773     |
| R01_cb6851_c2/flp0/2590      | NA                         | R01_cb6851_c2/flp0/2590     | NA                        | NA                           |
| R01_cb14148_c5/flp0/1278     | NA                         | NA                          | R01_cb14148_c5/flp0/1278  | R01_cb14148_c5/flp0/1278     |

|                              |                          |                              |                          |                             |
|------------------------------|--------------------------|------------------------------|--------------------------|-----------------------------|
| R01_cb18418_c1/flp0/427      | R01_cb18418_c1/flp0/427  | R01_cb18418_c1/flp0/427      | R01_cb18418_c1/flp0/427  | R01_cb18418_c1/flp0/427     |
| R01_cb9418_c1/flp1/2092      | NA                       | NA                           | NA                       | R01_cb9418_c1/flp1/2092     |
| R01_cb4233_c79/flp0/2292     | NA                       | R01_cb4233_c79/flp0/2292     | NA                       | R01_cb4233_c79/flp0/2292    |
| R01_cb17415_c5/flp0/324      | R01_cb17415_c5/flp0/324  | R01_cb17415_c5/flp0/324      | R01_cb17415_c5/flp0/324  | R01_cb17415_c5/flp0/324     |
| R01_cb16763_c1/flp0/1737     | NA                       | R01_cb16763_c1/flp0/1737     | NA                       | NA                          |
| R01_cb4327_c13/flp0/1067     | R01_cb4327_c13/flp0/1067 | R01_cb4327_c13/flp0/1067     | NA                       | R01_cb4327_c13/flp0/1067    |
| R01_cb18780_c7/flp10/7292    | NA                       | R01_cb18780_c7/flp10/7292    | NA                       | NA                          |
| R01_cb8564_c123805/flp4/2237 | NA                       | R01_cb8564_c123805/flp4/2237 | NA                       | NA                          |
| R01_cb16476_c3/flp0/1357     | NA                       | R01_cb16476_c3/flp0/1357     | R01_cb16476_c3/flp0/1357 | R01_cb16476_c3/flp0/1357    |
| R01_cb16839_c1/flp0/1616     | NA                       | NA                           | NA                       | R01_cb16839_c1/flp0/1616    |
| R01_cb1438_c19/flp0/2633     | NA                       | NA                           | NA                       | R01_cb1438_c19/flp0/2633    |
| R01_cb14002_c6/flp1/718      | NA                       | R01_cb14002_c6/flp1/718      | R01_cb14002_c6/flp1/718  | R01_cb14002_c6/flp1/718     |
| R01_cb3750_c9/flp0/2220      | NA                       | NA                           | NA                       | R01_cb3750_c9/flp0/2220     |
| R01_cb10015_c401/flp0/647    | NA                       | R01_cb10015_c401/flp0/647    | NA                       | NA                          |
| R01_cb8529_c9/flp0/821       | NA                       | R01_cb8529_c9/flp0/821       | R01_cb8529_c9/flp0/821   | R01_cb8529_c9/flp0/821      |
| R01_cb12617_c7/flp0/1281     | NA                       | R01_cb12617_c7/flp0/1281     | R01_cb12617_c7/flp0/1281 | R01_cb12617_c7/flp0/1281    |
| R01_cb11587_c1/flp0/3580     | NA                       | R01_cb11587_c1/flp0/3580     | NA                       | NA                          |
| R01_cb8564_c68710/f3p1/3032  | NA                       | NA                           | NA                       | R01_cb8564_c68710/f3p1/3032 |
| R01_cb4269_c5/flp0/2116      | NA                       | NA                           | NA                       | R01_cb4269_c5/flp0/2116     |
| R01_cb7653_c9/flp0/3045      | NA                       | NA                           | NA                       | R01_cb7653_c9/flp0/3045     |
| R01_cb18074_c0/f3p0/325      | R01_cb18074_c0/f3p0/325  | R01_cb18074_c0/f3p0/325      | R01_cb18074_c0/f3p0/325  | R01_cb18074_c0/f3p0/325     |
| R01_cb16425_c4/flp0/1239     | NA                       | R01_cb16425_c4/flp0/1239     | NA                       | NA                          |
| R01_cb13049_c22/flp0/469     | R01_cb13049_c22/flp0/469 | R01_cb13049_c22/flp0/469     | NA                       | R01_cb13049_c22/flp0/469    |
| R01_cb13682_c8/flp0/760      | R01_cb13682_c8/flp0/760  | R01_cb13682_c8/flp0/760      | NA                       | R01_cb13682_c8/flp0/760     |
| R01_cb3752_c7/flp0/3475      | NA                       | NA                           | NA                       | R01_cb3752_c7/flp0/3475     |

|                              |                              |                              |                          |                              |
|------------------------------|------------------------------|------------------------------|--------------------------|------------------------------|
| R01_cb16581_c2/f1p0/386      | R01_cb16581_c2/f1p0/386      | R01_cb16581_c2/f1p0/386      | NA                       | NA                           |
| R01_cb872_c2/f1p0/2964       | NA                           | NA                           | NA                       | R01_cb872_c2/f1p0/2964       |
| R01_cb3464_c2/f1p0/4818      | NA                           | NA                           | NA                       | R01_cb3464_c2/f1p0/4818      |
| R01_cb18487_c0/f3p0/860      | NA                           | R01_cb18487_c0/f3p0/860      | NA                       | NA                           |
| R01_cb10384_c5/f1p0/3285     | NA                           | R01_cb10384_c5/f1p0/3285     | NA                       | R01_cb10384_c5/f1p0/3285     |
| R01_cb16678_c10/f1p0/724     | NA                           | R01_cb16678_c10/f1p0/724     | R01_cb16678_c10/f1p0/724 | R01_cb16678_c10/f1p0/724     |
| R01_cb14720_c5/f1p0/504      | NA                           | NA                           | NA                       | R01_cb14720_c5/f1p0/504      |
| R01_cb1077_c21/f1p0/3053     | NA                           | R01_cb1077_c21/f1p0/3053     | R01_cb1077_c21/f1p0/3053 | R01_cb1077_c21/f1p0/3053     |
| R01_cb9960_c7/f1p0/1570      | NA                           | NA                           | NA                       | R01_cb9960_c7/f1p0/1570      |
| R01_cb15932_c1/f2p0/406      | NA                           | NA                           | R01_cb15932_c1/f2p0/406  | R01_cb15932_c1/f2p0/406      |
| R01_cb8564_c118967/f1p0/2070 | NA                           | NA                           | NA                       | R01_cb8564_c118967/f1p0/2070 |
| R01_cb14373_c2/f2p0/803      | NA                           | R01_cb14373_c2/f2p0/803      | NA                       | NA                           |
| R01_cb11532_c2/f1p0/1057     | NA                           | R01_cb11532_c2/f1p0/1057     | NA                       | NA                           |
| R01_cb6802_c67/f1p0/2285     | NA                           | R01_cb6802_c67/f1p0/2285     | R01_cb6802_c67/f1p0/2285 | R01_cb6802_c67/f1p0/2285     |
| R01_cb15811_c15/f1p0/745     | R01_cb15811_c15/f1p0/745     | R01_cb15811_c15/f1p0/745     | R01_cb15811_c15/f1p0/745 | R01_cb15811_c15/f1p0/745     |
| R01_cb15202_c3/f1p0/555      | NA                           | R01_cb15202_c3/f1p0/555      | NA                       | NA                           |
| R01_cb8409_c5/f1p0/2657      | NA                           | NA                           | NA                       | R01_cb8409_c5/f1p0/2657      |
| R01_cb8564_c122048/f1p0/2289 | R01_cb8564_c122048/f1p0/2289 | R01_cb8564_c122048/f1p0/2289 | NA                       | NA                           |
| R01_cb14481_c0/f2p0/586      | NA                           | NA                           | NA                       | R01_cb14481_c0/f2p0/586      |
| R01_cb8660_c4/f3p0/2144      | NA                           | NA                           | NA                       | R01_cb8660_c4/f3p0/2144      |
| R01_cb8973_c1/f1p0/2223      | R01_cb8973_c1/f1p0/2223      | R01_cb8973_c1/f1p0/2223      | NA                       | NA                           |
| R01_cb7595_c19/f1p0/737      | NA                           | R01_cb7595_c19/f1p0/737      | NA                       | R01_cb7595_c19/f1p0/737      |
| R01_cb17973_c56/f1p0/1679    | NA                           | R01_cb17973_c56/f1p0/1679    | NA                       | R01_cb17973_c56/f1p0/1679    |
| R01_cb1052_c14/f1p0/4280     | NA                           | R01_cb1052_c14/f1p0/4280     | NA                       | NA                           |

|                              |                          |                            |                            |                              |
|------------------------------|--------------------------|----------------------------|----------------------------|------------------------------|
| R01_cb15092_c8/flp0/748      | NA                       | NA                         | NA                         | R01_cb15092_c8/flp0/748      |
| R01_cb10372_c10/flp0/461     | R01_cb10372_c10/flp0/461 | R01_cb10372_c10/flp0/461   | NA                         | NA                           |
| R01_cb16723_c2/flp0/1296     | NA                       | R01_cb16723_c2/flp0/1296   | NA                         | NA                           |
| R01_cb18285_c1/flp0/1004     | NA                       | NA                         | NA                         | R01_cb18285_c1/flp0/1004     |
| R01_cb7457_c2/flp0/2769      | R01_cb7457_c2/flp0/2769  | R01_cb7457_c2/flp0/2769    | NA                         | NA                           |
| R01_cb14761_c6/flp0/852      | NA                       | NA                         | R01_cb14761_c6/flp0/852    | R01_cb14761_c6/flp0/852      |
| R01_cb4023_c10/flp1/3217     | NA                       | R01_cb4023_c10/flp1/3217   | NA                         | NA                           |
| R01_cb14843_c3/flp0/845      | NA                       | NA                         | NA                         | R01_cb14843_c3/flp0/845      |
| R01_cb1254_c8/flp1/4309      | NA                       | R01_cb1254_c8/flp1/4309    | NA                         | NA                           |
| R01_cb10413_c2/flp0/1779     | NA                       | R01_cb10413_c2/flp0/1779   | R01_cb10413_c2/flp0/1779   | R01_cb10413_c2/flp0/1779     |
| R01_cb2959_c0/flp0/3757      | NA                       | NA                         | NA                         | R01_cb2959_c0/flp0/3757      |
| R01_cb15107_c1/flp1/550      | NA                       | R01_cb15107_c1/flp1/550    | NA                         | R01_cb15107_c1/flp1/550      |
| R01_cb16504_c0/f5p0/1765     | NA                       | NA                         | NA                         | R01_cb16504_c0/f5p0/1765     |
| R01_cb9606_c69/flp0/1761     | NA                       | R01_cb9606_c69/flp0/1761   | R01_cb9606_c69/flp0/1761   | R01_cb9606_c69/flp0/1761     |
| R01_cb5659_c29/f2p0/2193     | NA                       | NA                         | NA                         | R01_cb5659_c29/f2p0/2193     |
| R01_cb1772_c11/flp0/3842     | NA                       | R01_cb1772_c11/flp0/3842   | NA                         | NA                           |
| R01_cb14316_c12/flp0/444     | R01_cb14316_c12/flp0/444 | R01_cb14316_c12/flp0/444   | R01_cb14316_c12/flp0/444   | R01_cb14316_c12/flp0/444     |
| R01_cb2048_c8/flp0/2138      | NA                       | NA                         | NA                         | R01_cb2048_c8/flp0/2138      |
| R01_cb14179_c4/f4p1/512      | NA                       | NA                         | R01_cb14179_c4/f4p1/512    | R01_cb14179_c4/f4p1/512      |
| R01_cb3421_c17/flp1/2912     | NA                       | NA                         | NA                         | R01_cb3421_c17/flp1/2912     |
| R01_cb8564_c1403/flp0/2069   | NA                       | R01_cb8564_c1403/flp0/2069 | R01_cb8564_c1403/flp0/2069 | R01_cb8564_c1403/flp0/2069   |
| R01_cb8564_c150188/flp0/3276 | NA                       | NA                         | NA                         | R01_cb8564_c150188/flp0/3276 |
| R01_cb12297_c1/flp0/651      | NA                       | NA                         | NA                         | R01_cb12297_c1/flp0/651      |
| R01_cb10930_c0/flp0/831      | R01_cb10930_c0/flp0/831  | R01_cb10930_c0/flp0/831    | R01_cb10930_c0/flp0/831    | R01_cb10930_c0/flp0/831      |
| R01_cb14403_c7/flp0/546      | R01_cb14403_c7/flp0/546  | NA                         | R01_cb14403_c7/flp0/546    | R01_cb14403_c7/flp0/546      |

|                                  |                             |                                  |                          |                                  |
|----------------------------------|-----------------------------|----------------------------------|--------------------------|----------------------------------|
| R01_cb8564_c1322/flp1/4079       | NA                          | NA                               | NA                       | R01_cb8564_c1322/flp1/4079       |
| R01_cb1138_c58/flp1/889          | NA                          | NA                               | R01_cb1138_c58/flp1/889  | R01_cb1138_c58/flp1/889          |
| R01_cb8564_c124149/flp0/334<br>2 | NA                          | R01_cb8564_c124149/flp0/334<br>2 | NA                       | NA                               |
| R01_cb7497_c22/flp0/2606         | NA                          | NA                               | NA                       | R01_cb7497_c22/flp0/2606         |
| R01_cb17973_c18/flp0/1316        | NA                          | R01_cb17973_c18/flp0/1316        | NA                       | NA                               |
| R01_cb6779_c2/f3p0/1760          | NA                          | NA                               | NA                       | R01_cb6779_c2/f3p0/1760          |
| R01_cb8564_c16457/flp0/2899      | NA                          | R01_cb8564_c16457/flp0/2899      | NA                       | NA                               |
| R01_cb3007_c3/flp0/3424          | NA                          | R01_cb3007_c3/flp0/3424          | NA                       | NA                               |
| R01_cb10034_c25/flp0/521         | NA                          | R01_cb10034_c25/flp0/521         | NA                       | NA                               |
| R01_cb3712_c1/f2p0/3548          | R01_cb3712_c1/f2p0/3548     | R01_cb3712_c1/f2p0/3548          | NA                       | NA                               |
| R01_cb8564_c19634/flp1/3199      | NA                          | R01_cb8564_c19634/flp1/3199      | NA                       | R01_cb8564_c19634/flp1/3199      |
| R01_cb11212_c9/flp0/758          | NA                          | R01_cb11212_c9/flp0/758          | NA                       | NA                               |
| R01_cb3971_c1/flp0/3443          | NA                          | R01_cb3971_c1/flp0/3443          | NA                       | NA                               |
| R01_cb9713_c0/flp0/2005          | R01_cb9713_c0/flp0/2005     | R01_cb9713_c0/flp0/2005          | NA                       | NA                               |
| R01_cb7945_c3/flp0/2023          | NA                          | NA                               | NA                       | R01_cb7945_c3/flp0/2023          |
| R01_cb2320_c0/f3p1/3932          | NA                          | NA                               | NA                       | R01_cb2320_c0/f3p1/3932          |
| R01_cb8564_c2545/flp0/3411       | R01_cb8564_c2545/flp0/3411  | NA                               | NA                       | NA                               |
| R01_cb13662_c0/flp0/639          | R01_cb13662_c0/flp0/639     | R01_cb13662_c0/flp0/639          | NA                       | R01_cb13662_c0/flp0/639          |
| R01_cb8564_c114298/flp0/246<br>0 | NA                          | NA                               | NA                       | R01_cb8564_c114298/flp0/246<br>0 |
| R01_cb8564_c89913/flp1/3572      | NA                          | NA                               | NA                       | R01_cb8564_c89913/flp1/3572      |
| R01_cb3287_c2/flp0/3389          | NA                          | NA                               | NA                       | R01_cb3287_c2/flp0/3389          |
| R01_cb11025_c0/f4p0/1518         | NA                          | NA                               | NA                       | R01_cb11025_c0/f4p0/1518         |
| R01_cb10545_c1/flp0/1948         | R01_cb10545_c1/flp0/1948    | R01_cb10545_c1/flp0/1948         | R01_cb10545_c1/flp0/1948 | R01_cb10545_c1/flp0/1948         |
| R01_cb8564_c19484/flp0/3244      | R01_cb8564_c19484/flp0/3244 | R01_cb8564_c19484/flp0/3244      | NA                       | R01_cb8564_c19484/flp0/3244      |

|                             |                             |                             |                             |                             |
|-----------------------------|-----------------------------|-----------------------------|-----------------------------|-----------------------------|
|                             | 4                           |                             |                             |                             |
| R01_cb12319_c0/flp0/589     | R01_cb12319_c0/flp0/589     | NA                          | NA                          | R01_cb12319_c0/flp0/589     |
| R01_cb15551_c1/flp0/856     | NA                          | R01_cb15551_c1/flp0/856     | NA                          | NA                          |
| R01_cb2224_c2/flp0/4006     | NA                          | R01_cb2224_c2/flp0/4006     | NA                          | NA                          |
| R01_cb18456_c5436/flp0/598  | R01_cb18456_c5436/flp0/598  | R01_cb18456_c5436/flp0/598  | R01_cb18456_c5436/flp0/598  | R01_cb18456_c5436/flp0/598  |
| R01_cb11535_c1/flp0/1910    | R01_cb11535_c1/flp0/1910    | R01_cb11535_c1/flp0/1910    | NA                          | NA                          |
| R01_cb6198_c0/flp0/2916     | NA                          | R01_cb6198_c0/flp0/2916     | NA                          | R01_cb6198_c0/flp0/2916     |
| R01_cb11316_c0/flp0/1092    | NA                          | R01_cb11316_c0/flp0/1092    | NA                          | R01_cb11316_c0/flp0/1092    |
| R01_cb16526_c6/flp0/1280    | NA                          | R01_cb16526_c6/flp0/1280    | NA                          | NA                          |
| R01_cb8564_c42130/flp0/3239 | NA                          | NA                          | NA                          | R01_cb8564_c42130/flp0/3239 |
| R01_cb7286_c5/flp1/2594     | NA                          | R01_cb7286_c5/flp1/2594     | NA                          | NA                          |
| R01_cb5983_c2/f2p0/824      | NA                          | NA                          | NA                          | R01_cb5983_c2/f2p0/824      |
| R01_cb335_c1/flp0/4866      | NA                          | NA                          | NA                          | R01_cb335_c1/flp0/4866      |
| R01_cb10024_c395/flp1/744   | NA                          | NA                          | R01_cb10024_c395/flp1/744   | R01_cb10024_c395/flp1/744   |
| R01_cb7565_c2/flp0/1575     | NA                          | NA                          | R01_cb7565_c2/flp0/1575     | R01_cb7565_c2/flp0/1575     |
| R01_cb8564_c18794/flp0/4376 | NA                          | NA                          | NA                          | R01_cb8564_c18794/flp0/4376 |
| R01_cb2543_c35/flp0/2891    | NA                          | R01_cb2543_c35/flp0/2891    | NA                          | NA                          |
| R01_cb6143_c12/flp0/948     | NA                          | R01_cb6143_c12/flp0/948     | NA                          | NA                          |
| R01_cb12421_c19/f2p0/616    | R01_cb12421_c19/f2p0/616    | R01_cb12421_c19/f2p0/616    | NA                          | NA                          |
| R01_cb10229_c9/flp0/1628    | R01_cb10229_c9/flp0/1628    | R01_cb10229_c9/flp0/1628    | NA                          | R01_cb10229_c9/flp0/1628    |
| R01_cb8564_c69948/flp0/2609 | NA                          | NA                          | R01_cb8564_c69948/flp0/2609 | NA                          |
| R01_cb8564_c45501/flp1/2240 | NA                          | R01_cb8564_c45501/flp1/2240 | NA                          | NA                          |
| R01_cb17756_c15/flp0/1779   | NA                          | R01_cb17756_c15/flp0/1779   | R01_cb17756_c15/flp0/1779   | R01_cb17756_c15/flp0/1779   |
| R01_cb8564_c124692/flp0/203 | NA                          | NA                          | NA                          | R01_cb8564_c124692/flp0/203 |
| 3                           |                             |                             |                             | 3                           |
| R01_cb8564_c92247/f2p0/2361 | R01_cb8564_c92247/f2p0/2361 | R01_cb8564_c92247/f2p0/2361 | R01_cb8564_c92247/f2p0/2361 | R01_cb8564_c92247/f2p0/2361 |

|                             |                             |                             |                             |                             |
|-----------------------------|-----------------------------|-----------------------------|-----------------------------|-----------------------------|
|                             | 1                           |                             |                             |                             |
| R01_cb10237_c0/f8p0/1279    | NA                          | NA                          | NA                          | R01_cb10237_c0/f8p0/1279    |
| R01_cb8564_c34590/f3p0/3393 | NA                          | R01_cb8564_c34590/f3p0/3393 | NA                          | R01_cb8564_c34590/f3p0/3393 |
| R01_cb6631_c30/flp1/2206    | NA                          | NA                          | NA                          | R01_cb6631_c30/flp1/2206    |
| R01_cb16269_c2/flp0/656     | NA                          | R01_cb16269_c2/flp0/656     | NA                          | R01_cb16269_c2/flp0/656     |
| R01_cb18456_c5156/flp2/593  | R01_cb18456_c5156/flp2/593  | R01_cb18456_c5156/flp2/593  | NA                          | R01_cb18456_c5156/flp2/593  |
| R01_cb6953_c2/flp0/2636     | NA                          | R01_cb6953_c2/flp0/2636     | NA                          | NA                          |
| R01_cb13914_c5/flp0/735     | NA                          | R01_cb13914_c5/flp0/735     | NA                          | R01_cb13914_c5/flp0/735     |
| R01_cb6369_c6/flp0/2455     | NA                          | NA                          | NA                          | R01_cb6369_c6/flp0/2455     |
| R01_cb2159_c3/flp0/3188     | NA                          | R01_cb2159_c3/flp0/3188     | NA                          | NA                          |
| R01_cb12634_c25/flp0/5582   | NA                          | R01_cb12634_c25/flp0/5582   | NA                          | NA                          |
| R01_cb412_c8/flp0/3694      | NA                          | NA                          | NA                          | R01_cb412_c8/flp0/3694      |
| R01_cb10920_c14/flp0/948    | NA                          | R01_cb10920_c14/flp0/948    | NA                          | NA                          |
| R01_cb950_c26/flp0/3270     | NA                          | R01_cb950_c26/flp0/3270     | R01_cb950_c26/flp0/3270     | NA                          |
| R01_cb8564_c146370/f3p0/266 | NA                          | NA                          | R01_cb8564_c146370/f3p0/266 | R01_cb8564_c146370/f3p0/266 |
| 4                           |                             |                             | 4                           | 4                           |
| R01_cb2729_c3/flp0/1910     | NA                          | R01_cb2729_c3/flp0/1910     | NA                          | R01_cb2729_c3/flp0/1910     |
| R01_cb8564_c52715/f3p0/2152 | R01_cb8564_c52715/f3p0/2152 | R01_cb8564_c52715/f3p0/2152 | R01_cb8564_c52715/f3p0/2152 | R01_cb8564_c52715/f3p0/2152 |
|                             | 2                           |                             |                             |                             |
| R01_cb9506_c5/flp0/2064     | NA                          | NA                          | NA                          | R01_cb9506_c5/flp0/2064     |
| R01_cb18050_c0/f2p0/1027    | NA                          | NA                          | R01_cb18050_c0/f2p0/1027    | R01_cb18050_c0/f2p0/1027    |
| R01_cb11283_c5/f2p0/470     | NA                          | R01_cb11283_c5/f2p0/470     | NA                          | R01_cb11283_c5/f2p0/470     |
| R01_cb8334_c2/flp0/1913     | NA                          | R01_cb8334_c2/flp0/1913     | NA                          | NA                          |
| R01_cb8564_c51841/flp0/2363 | NA                          | R01_cb8564_c51841/flp0/2363 | NA                          | NA                          |
| R01_cb18456_c5294/flp3/810  | NA                          | R01_cb18456_c5294/flp3/810  | NA                          | NA                          |
| R01_cb15533_c16/flp0/1556   | R01_cb15533_c16/flp0/1556   | NA                          | R01_cb15533_c16/flp0/1556   | R01_cb15533_c16/flp0/1556   |

|                             |                            |                             |                          |                             |
|-----------------------------|----------------------------|-----------------------------|--------------------------|-----------------------------|
| R01_cb6004_c3/flp1/2038     | NA                         | NA                          | NA                       | R01_cb6004_c3/flp1/2038     |
| R01_cb8564_c46857/flp0/2753 | NA                         | R01_cb8564_c46857/flp0/2753 | NA                       | NA                          |
| R01_cb18452_c1/flp0/582     | NA                         | R01_cb18452_c1/flp0/582     | NA                       | R01_cb18452_c1/flp0/582     |
| R01_cb11088_c0/flp0/1268    | NA                         | NA                          | NA                       | R01_cb11088_c0/flp0/1268    |
| R01_cb10014_c24/f2p0/533    | NA                         | R01_cb10014_c24/f2p0/533    | NA                       | NA                          |
| R01_cb13901_c2/flp0/401     | R01_cb13901_c2/flp0/401    | R01_cb13901_c2/flp0/401     | NA                       | R01_cb13901_c2/flp0/401     |
| R01_cb5517_c0/flp0/3079     | NA                         | NA                          | R01_cb5517_c0/flp0/3079  | NA                          |
| R01_cb13418_c31/flp0/388    | R01_cb13418_c31/flp0/388   | R01_cb13418_c31/flp0/388    | R01_cb13418_c31/flp0/388 | R01_cb13418_c31/flp0/388    |
| R01_cb1433_c6/flp0/2612     | NA                         | R01_cb1433_c6/flp0/2612     | NA                       | R01_cb1433_c6/flp0/2612     |
| R01_cb8793_c0/f2p0/2269     | R01_cb8793_c0/f2p0/2269    | R01_cb8793_c0/f2p0/2269     | R01_cb8793_c0/f2p0/2269  | R01_cb8793_c0/f2p0/2269     |
| R01_cb16824_c2/flp1/900     | NA                         | NA                          | NA                       | R01_cb16824_c2/flp1/900     |
| R01_cb11517_c1/flp0/2922    | NA                         | R01_cb11517_c1/flp0/2922    | NA                       | NA                          |
| R01_cb1378_c14/flp0/648     | R01_cb1378_c14/flp0/648    | R01_cb1378_c14/flp0/648     | R01_cb1378_c14/flp0/648  | R01_cb1378_c14/flp0/648     |
| R01_cb12774_c1/flp0/1122    | R01_cb12774_c1/flp0/1122   | R01_cb12774_c1/flp0/1122    | R01_cb12774_c1/flp0/1122 | R01_cb12774_c1/flp0/1122    |
| R01_cb7080_c1/flp0/2547     | NA                         | R01_cb7080_c1/flp0/2547     | NA                       | NA                          |
| R01_cb8564_c19334/flp0/2329 | NA                         | R01_cb8564_c19334/flp0/2329 | NA                       | R01_cb8564_c19334/flp0/2329 |
| R01_cb8564_c3074/flp0/3838  | R01_cb8564_c3074/flp0/3838 | R01_cb8564_c3074/flp0/3838  | NA                       | R01_cb8564_c3074/flp0/3838  |
| R01_cb5552_c3/flp0/1049     | NA                         | NA                          | NA                       | R01_cb5552_c3/flp0/1049     |
| R01_cb12750_c2/flp0/652     | NA                         | R01_cb12750_c2/flp0/652     | NA                       | R01_cb12750_c2/flp0/652     |
| R01_cb2581_c4/flp0/884      | NA                         | R01_cb2581_c4/flp0/884      | R01_cb2581_c4/flp0/884   | R01_cb2581_c4/flp0/884      |
| R01_cb15053_c6/flp0/929     | NA                         | R01_cb15053_c6/flp0/929     | R01_cb15053_c6/flp0/929  | NA                          |
| R01_cb14927_c3/flp0/690     | R01_cb14927_c3/flp0/690    | R01_cb14927_c3/flp0/690     | R01_cb14927_c3/flp0/690  | R01_cb14927_c3/flp0/690     |
| R01_cb9593_c9/flp0/2421     | R01_cb9593_c9/flp0/2421    | R01_cb9593_c9/flp0/2421     | NA                       | NA                          |
| R01_cb17035_c1/flp0/440     | R01_cb17035_c1/flp0/440    | R01_cb17035_c1/flp0/440     | R01_cb17035_c1/flp0/440  | R01_cb17035_c1/flp0/440     |
| R01_cb3735_c10/flp0/368     | R01_cb3735_c10/flp0/368    | R01_cb3735_c10/flp0/368     | R01_cb3735_c10/flp0/368  | R01_cb3735_c10/flp0/368     |
| R01_cb10913_c4/flp0/1053    | NA                         | NA                          | NA                       | R01_cb10913_c4/flp0/1053    |



|                             |                             |                             |                             |                             |
|-----------------------------|-----------------------------|-----------------------------|-----------------------------|-----------------------------|
| R01_cb8111_c1/flp0/2250     | NA                          | NA                          | NA                          | R01_cb8111_c1/flp0/2250     |
| R01_cb3303_c4/flp0/6230     | NA                          | R01_cb3303_c4/flp0/6230     | R01_cb3303_c4/flp0/6230     | R01_cb3303_c4/flp0/6230     |
| R01_cb6448_c6/flp0/3003     | NA                          | R01_cb6448_c6/flp0/3003     | NA                          | NA                          |
| R01_cb2497_c9/f4p0/3867     | NA                          | NA                          | NA                          | R01_cb2497_c9/f4p0/3867     |
| R01_cb9236_c1/flp0/2605     | NA                          | NA                          | NA                          | R01_cb9236_c1/flp0/2605     |
| R01_cb4944_c10/flp0/1431    | R01_cb4944_c10/flp0/1431    | R01_cb4944_c10/flp0/1431    | NA                          | R01_cb4944_c10/flp0/1431    |
| R01_cb10145_c0/f3p0/1580    | NA                          | NA                          | NA                          | R01_cb10145_c0/f3p0/1580    |
| R01_cb6272_c5/flp2/2588     | NA                          | NA                          | NA                          | R01_cb6272_c5/flp2/2588     |
| R01_cb7982_c1/flp0/2007     | NA                          | NA                          | NA                          | R01_cb7982_c1/flp0/2007     |
| R01_cb14316_c11/flp0/707    | R01_cb14316_c11/flp0/707    | R01_cb14316_c11/flp0/707    | R01_cb14316_c11/flp0/707    | R01_cb14316_c11/flp0/707    |
| R01_cb17467_c0/flp0/802     | R01_cb17467_c0/flp0/802     | R01_cb17467_c0/flp0/802     | R01_cb17467_c0/flp0/802     | R01_cb17467_c0/flp0/802     |
| R01_cb14943_c3/flp0/1770    | NA                          | R01_cb14943_c3/flp0/1770    | NA                          | NA                          |
| R01_cb8564_c69452/flp1/2532 | NA                          | R01_cb8564_c69452/flp1/2532 | R01_cb8564_c69452/flp1/2532 | R01_cb8564_c69452/flp1/2532 |
| R01_cb2357_c3/flp0/4314     | NA                          | NA                          | NA                          | R01_cb2357_c3/flp0/4314     |
| R01_cb13713_c7/flp0/1520    | NA                          | R01_cb13713_c7/flp0/1520    | NA                          | NA                          |
| R01_cb18456_c1656/f2p0/510  | NA                          | R01_cb18456_c1656/f2p0/510  | R01_cb18456_c1656/f2p0/510  | R01_cb18456_c1656/f2p0/510  |
| R01_cb1392_c12/flp0/2918    | NA                          | NA                          | NA                          | R01_cb1392_c12/flp0/2918    |
| R01_cb11481_c2/flp0/563     | NA                          | R01_cb11481_c2/flp0/563     | NA                          | R01_cb11481_c2/flp0/563     |
| R01_cb16712_c1/flp1/1173    | NA                          | NA                          | NA                          | R01_cb16712_c1/flp1/1173    |
| R01_cb10930_c2/flp0/567     | R01_cb10930_c2/flp0/567     | R01_cb10930_c2/flp0/567     | R01_cb10930_c2/flp0/567     | R01_cb10930_c2/flp0/567     |
| R01_cb8376_c6/flp0/814      | NA                          | R01_cb8376_c6/flp0/814      | R01_cb8376_c6/flp0/814      | R01_cb8376_c6/flp0/814      |
| R01_cb12574_c1/flp0/1859    | R01_cb12574_c1/flp0/1859    | R01_cb12574_c1/flp0/1859    | R01_cb12574_c1/flp0/1859    | R01_cb12574_c1/flp0/1859    |
| R01_cb11032_c4/flp0/833     | NA                          | NA                          | NA                          | R01_cb11032_c4/flp0/833     |
| R01_cb18456_c5429/flp0/1055 | R01_cb18456_c5429/flp0/1055 | R01_cb18456_c5429/flp0/1055 | R01_cb18456_c5429/flp0/1055 | R01_cb18456_c5429/flp0/1055 |
| R01_cb2494_c7/flp0/4101     | NA                          | R01_cb2494_c7/flp0/4101     | NA                          | NA                          |

|                             |                             |                             |                             |                             |
|-----------------------------|-----------------------------|-----------------------------|-----------------------------|-----------------------------|
| R01_cb14817_c0/flp0/1796    | NA                          | R01_cb14817_c0/flp0/1796    | R01_cb14817_c0/flp0/1796    | R01_cb14817_c0/flp0/1796    |
| R01_cb18270_c0/f3p0/1009    | NA                          | NA                          | NA                          | R01_cb18270_c0/f3p0/1009    |
| R01_cb12098_c39/flp0/422    | R01_cb12098_c39/flp0/422    | R01_cb12098_c39/flp0/422    | R01_cb12098_c39/flp0/422    | R01_cb12098_c39/flp0/422    |
| R01_cb9912_c3/flp0/1992     | NA                          | R01_cb9912_c3/flp0/1992     | NA                          | NA                          |
| R01_cb16146_c1/f2p0/557     | NA                          | R01_cb16146_c1/f2p0/557     | NA                          | NA                          |
| R01_cb8564_c72933/flp0/2989 | NA                          | R01_cb8564_c72933/flp0/2989 | NA                          | R01_cb8564_c72933/flp0/2989 |
| R01_cb8564_c80475/flp0/2363 | R01_cb8564_c80475/flp0/2363 | R01_cb8564_c80475/flp0/2363 | R01_cb8564_c80475/flp0/2363 | R01_cb8564_c80475/flp0/2363 |
| R01_cb416_c17/flp0/1988     | NA                          | R01_cb416_c17/flp0/1988     | NA                          | R01_cb416_c17/flp0/1988     |
| R01_cb5103_c9/flp0/1895     | NA                          | R01_cb5103_c9/flp0/1895     | NA                          | NA                          |
| R01_cb3502_c1/flp0/3612     | NA                          | NA                          | NA                          | R01_cb3502_c1/flp0/3612     |
| R01_cb8564_c25499/flp0/2032 | NA                          | R01_cb8564_c25499/flp0/2032 | R01_cb8564_c25499/flp0/2032 | NA                          |
| R01_cb11664_c3/flp0/910     | NA                          | R01_cb11664_c3/flp0/910     | NA                          | NA                          |
| R01_cb8849_c0/f2p0/1558     | NA                          | NA                          | NA                          | R01_cb8849_c0/f2p0/1558     |
| R01_cb1739_c19/flp0/1232    | NA                          | R01_cb1739_c19/flp0/1232    | R01_cb1739_c19/flp0/1232    | R01_cb1739_c19/flp0/1232    |
| R01_cb3667_c3/flp0/3564     | NA                          | NA                          | NA                          | R01_cb3667_c3/flp0/3564     |
| R01_cb4584_c16/flp0/3319    | NA                          | NA                          | NA                          | R01_cb4584_c16/flp0/3319    |
| R01_cb2594_c3/flp0/554      | NA                          | R01_cb2594_c3/flp0/554      | NA                          | NA                          |
| R01_cb8564_c90811/flp0/3128 | NA                          | R01_cb8564_c90811/flp0/3128 | R01_cb8564_c90811/flp0/3128 | NA                          |
| R01_cb17118_c3/flp0/608     | NA                          | R01_cb17118_c3/flp0/608     | R01_cb17118_c3/flp0/608     | R01_cb17118_c3/flp0/608     |
| R01_cb11246_c1/flp0/2206    | NA                          | R01_cb11246_c1/flp0/2206    | NA                          | NA                          |
| R01_cb15701_c9/flp0/1645    | NA                          | R01_cb15701_c9/flp0/1645    | NA                          | NA                          |
| R01_cb1207_c16/flp0/3156    | NA                          | NA                          | NA                          | R01_cb1207_c16/flp0/3156    |
| R01_cb7158_c0/flp0/2685     | NA                          | R01_cb7158_c0/flp0/2685     | R01_cb7158_c0/flp0/2685     | R01_cb7158_c0/flp0/2685     |
| R01_cb5896_c51/flp0/2173    | NA                          | R01_cb5896_c51/flp0/2173    | NA                          | NA                          |
| R01_cb14799_c15/flp0/358    | R01_cb14799_c15/flp0/358    | R01_cb14799_c15/flp0/358    | R01_cb14799_c15/flp0/358    | R01_cb14799_c15/flp0/358    |

|                              |                             |                             |                             |                              |
|------------------------------|-----------------------------|-----------------------------|-----------------------------|------------------------------|
| R01_cb17738_c0/flp0/1658     | NA                          | NA                          | NA                          | R01_cb17738_c0/flp0/1658     |
| R01_cb17456_c1/flp0/1684     | NA                          | R01_cb17456_c1/flp0/1684    | R01_cb17456_c1/flp0/1684    | R01_cb17456_c1/flp0/1684     |
| R01_cb8564_c1919/flp0/2484   | NA                          | NA                          | R01_cb8564_c1919/flp0/2484  | R01_cb8564_c1919/flp0/2484   |
| R01_cb17404_c1/flp0/1469     | R01_cb17404_c1/flp0/1469    | R01_cb17404_c1/flp0/1469    | R01_cb17404_c1/flp0/1469    | R01_cb17404_c1/flp0/1469     |
| R01_cb16678_c6/flp0/1856     | NA                          | R01_cb16678_c6/flp0/1856    | R01_cb16678_c6/flp0/1856    | R01_cb16678_c6/flp0/1856     |
| R01_cb14446_c2/flp0/677      | R01_cb14446_c2/flp0/677     | R01_cb14446_c2/flp0/677     | NA                          | NA                           |
| R01_cb8178_c5/flp0/1295      | NA                          | R01_cb8178_c5/flp0/1295     | NA                          | NA                           |
| R01_cb14565_c1/flp0/948      | NA                          | R01_cb14565_c1/flp0/948     | NA                          | R01_cb14565_c1/flp0/948      |
| R01_cb1813_c6/f3p1/2562      | NA                          | NA                          | NA                          | R01_cb1813_c6/f3p1/2562      |
| R01_cb1739_c9/flp0/6056      | NA                          | NA                          | NA                          | R01_cb1739_c9/flp0/6056      |
| R01_cb8564_c69835/flp0/2719  | NA                          | R01_cb8564_c69835/flp0/2719 | NA                          | R01_cb8564_c69835/flp0/2719  |
| R01_cb4062_c3/flp0/921       | NA                          | R01_cb4062_c3/flp0/921      | NA                          | NA                           |
| R01_cb10974_c2/flp0/3806     | NA                          | R01_cb10974_c2/flp0/3806    | NA                          | NA                           |
| R01_cb416_c42/flp0/2638      | NA                          | NA                          | NA                          | R01_cb416_c42/flp0/2638      |
| R01_cb11303_c2/flp0/3394     | NA                          | R01_cb11303_c2/flp0/3394    | NA                          | NA                           |
| R01_cb4584_c6/flp0/3607      | NA                          | NA                          | NA                          | R01_cb4584_c6/flp0/3607      |
| R01_cb18456_c1883/flp0/1219  | R01_cb18456_c1883/flp0/1219 | R01_cb18456_c1883/flp0/1219 | R01_cb18456_c1883/flp0/1219 | R01_cb18456_c1883/flp0/1219  |
| R01_cb1418_c4/flp0/3446      | NA                          | NA                          | NA                          | R01_cb1418_c4/flp0/3446      |
| R01_cb8051_c8/f2p0/2289      | NA                          | NA                          | NA                          | R01_cb8051_c8/f2p0/2289      |
| R01_cb3582_c12/flp0/1714     | R01_cb3582_c12/flp0/1714    | R01_cb3582_c12/flp0/1714    | R01_cb3582_c12/flp0/1714    | R01_cb3582_c12/flp0/1714     |
| R01_cb11463_c1/flp0/2811     | R01_cb11463_c1/flp0/2811    | R01_cb11463_c1/flp0/2811    | NA                          | NA                           |
| R01_cb11507_c3/flp0/1559     | NA                          | NA                          | NA                          | R01_cb11507_c3/flp0/1559     |
| R01_cb11893_c1/flp0/1204     | NA                          | NA                          | NA                          | R01_cb11893_c1/flp0/1204     |
| R01_cb8564_c112962/flp0/2169 | NA                          | NA                          | NA                          | R01_cb8564_c112962/flp0/2169 |

|                             |                            |                             |                             |                             |
|-----------------------------|----------------------------|-----------------------------|-----------------------------|-----------------------------|
| R01_cb8564_c11627/f1p0/3735 | NA                         | R01_cb8564_c11627/f1p0/3735 | R01_cb8564_c11627/f1p0/3735 | R01_cb8564_c11627/f1p0/3735 |
| R01_cb8564_c45827/f2p2/4435 | NA                         | NA                          | NA                          | R01_cb8564_c45827/f2p2/4435 |
| R01_cb18243_c1/f3p1/677     | NA                         | R01_cb18243_c1/f3p1/677     | R01_cb18243_c1/f3p1/677     | NA                          |
| R01_cb15273_c7/f1p0/872     | NA                         | NA                          | R01_cb15273_c7/f1p0/872     | R01_cb15273_c7/f1p0/872     |
| R01_cb3618_c9/f1p0/2646     | NA                         | NA                          | NA                          | R01_cb3618_c9/f1p0/2646     |
| R01_cb3426_c9/f1p0/3425     | NA                         | NA                          | NA                          | R01_cb3426_c9/f1p0/3425     |
| R01_cb3716_c9/f1p0/2561     | NA                         | NA                          | NA                          | R01_cb3716_c9/f1p0/2561     |
| R01_cb4286_c11/f1p0/2813    | NA                         | R01_cb4286_c11/f1p0/2813    | NA                          | NA                          |
| R01_cb8564_c85128/f1p0/3287 | NA                         | R01_cb8564_c85128/f1p0/3287 | NA                          | NA                          |
| R01_cb2804_c109/f1p0/1890   | NA                         | R01_cb2804_c109/f1p0/1890   | R01_cb2804_c109/f1p0/1890   | R01_cb2804_c109/f1p0/1890   |
| R01_cb13545_c47/f1p0/918    | NA                         | R01_cb13545_c47/f1p0/918    | NA                          | NA                          |
| R01_cb10559_c3/f1p0/346     | R01_cb10559_c3/f1p0/346    | R01_cb10559_c3/f1p0/346     | R01_cb10559_c3/f1p0/346     | R01_cb10559_c3/f1p0/346     |
| R01_cb12421_c50/f1p0/597    | R01_cb12421_c50/f1p0/597   | R01_cb12421_c50/f1p0/597    | R01_cb12421_c50/f1p0/597    | R01_cb12421_c50/f1p0/597    |
| R01_cb3641_c2/f1p0/1911     | NA                         | R01_cb3641_c2/f1p0/1911     | NA                          | NA                          |
| R01_cb8564_c3699/f1p0/3713  | R01_cb8564_c3699/f1p0/3713 | R01_cb8564_c3699/f1p0/3713  | R01_cb8564_c3699/f1p0/3713  | R01_cb8564_c3699/f1p0/3713  |
| R01_cb7890_c0/f1p0/2511     | R01_cb7890_c0/f1p0/2511    | R01_cb7890_c0/f1p0/2511     | R01_cb7890_c0/f1p0/2511     | R01_cb7890_c0/f1p0/2511     |
| R01_cb5808_c5/f1p0/1115     | NA                         | NA                          | NA                          | R01_cb5808_c5/f1p0/1115     |
| R01_cb8564_c82877/f1p0/2948 | NA                         | R01_cb8564_c82877/f1p0/2948 | NA                          | NA                          |
| R01_cb10743_c1/f1p0/2920    | NA                         | R01_cb10743_c1/f1p0/2920    | R01_cb10743_c1/f1p0/2920    | R01_cb10743_c1/f1p0/2920    |
| R01_cb17930_c1/f2p0/1523    | NA                         | R01_cb17930_c1/f2p0/1523    | NA                          | R01_cb17930_c1/f2p0/1523    |
| R01_cb8564_c46212/f3p1/4373 | NA                         | NA                          | NA                          | R01_cb8564_c46212/f3p1/4373 |
| R01_cb17052_c3/f1p0/1786    | NA                         | NA                          | NA                          | R01_cb17052_c3/f1p0/1786    |
| R01_cb6371_c3/f1p0/1888     | NA                         | NA                          | NA                          | R01_cb6371_c3/f1p0/1888     |
| R01_cb2307_c7/f1p0/3667     | NA                         | R01_cb2307_c7/f1p0/3667     | NA                          | NA                          |
| R01_cb8051_c2/f1p0/2474     | NA                         | NA                          | NA                          | R01_cb8051_c2/f1p0/2474     |
| R01_cb8982_c0/f2p0/2127     | NA                         | NA                          | NA                          | R01_cb8982_c0/f2p0/2127     |

|                             |                          |                             |                             |                             |
|-----------------------------|--------------------------|-----------------------------|-----------------------------|-----------------------------|
| R01_cb2708_c23/flp0/2261    | NA                       | NA                          | R01_cb2708_c23/flp0/2261    | R01_cb2708_c23/flp0/2261    |
| R01_cb9448_c9/flp1/1806     | NA                       | NA                          | NA                          | R01_cb9448_c9/flp1/1806     |
| R01_cb1860_c23/flp0/2594    | NA                       | NA                          | NA                          | R01_cb1860_c23/flp0/2594    |
| R01_cb11733_c2/flp0/1505    | NA                       | NA                          | NA                          | R01_cb11733_c2/flp0/1505    |
| R01_cb891_c14/f4p1/3325     | NA                       | R01_cb891_c14/f4p1/3325     | R01_cb891_c14/f4p1/3325     | NA                          |
| R01_cb17218_c1/flp0/945     | NA                       | NA                          | NA                          | R01_cb17218_c1/flp0/945     |
| R01_cb11975_c6/flp0/1473    | NA                       | R01_cb11975_c6/flp0/1473    | R01_cb11975_c6/flp0/1473    | R01_cb11975_c6/flp0/1473    |
| R01_cb18456_c1822/flp0/606  | NA                       | NA                          | NA                          | R01_cb18456_c1822/flp0/606  |
| R01_cb10188_c6/flp0/962     | R01_cb10188_c6/flp0/962  | R01_cb10188_c6/flp0/962     | R01_cb10188_c6/flp0/962     | R01_cb10188_c6/flp0/962     |
| R01_cb10056_c6/flp0/1438    | R01_cb10056_c6/flp0/1438 | R01_cb10056_c6/flp0/1438    | R01_cb10056_c6/flp0/1438    | R01_cb10056_c6/flp0/1438    |
| R01_cb8564_c84403/flp0/3160 | NA                       | R01_cb8564_c84403/flp0/3160 | R01_cb8564_c84403/flp0/3160 | NA                          |
| R01_cb8564_c48301/flp2/3934 | NA                       | NA                          | NA                          | R01_cb8564_c48301/flp2/3934 |
| R01_cb7087_c1/flp0/2331     | NA                       | NA                          | NA                          | R01_cb7087_c1/flp0/2331     |
| R01_cb8564_c18679/flp1/2628 | NA                       | R01_cb8564_c18679/flp1/2628 | NA                          | NA                          |
| R01_cb18456_c7582/flp0/1283 | NA                       | R01_cb18456_c7582/flp0/1283 | NA                          | NA                          |
| R01_cb8324_c2/f2p0/1444     | NA                       | NA                          | NA                          | R01_cb8324_c2/f2p0/1444     |
| R01_cb15951_c7/flp0/404     | R01_cb15951_c7/flp0/404  | R01_cb15951_c7/flp0/404     | R01_cb15951_c7/flp0/404     | R01_cb15951_c7/flp0/404     |
| R01_cb18305_c0/f2p0/346     | R01_cb18305_c0/f2p0/346  | R01_cb18305_c0/f2p0/346     | R01_cb18305_c0/f2p0/346     | R01_cb18305_c0/f2p0/346     |
| R01_cb10260_c2/flp0/1126    | NA                       | R01_cb10260_c2/flp0/1126    | NA                          | NA                          |
| R01_cb5054_c3/flp0/2548     | NA                       | NA                          | R01_cb5054_c3/flp0/2548     | R01_cb5054_c3/flp0/2548     |
| R01_cb8564_c110092/flp3/272 | NA                       | NA                          | R01_cb8564_c110092/flp3/272 | NA                          |
| 4                           |                          |                             | 4                           |                             |
| R01_cb11171_c1/flp1/2450    | NA                       | R01_cb11171_c1/flp1/2450    | R01_cb11171_c1/flp1/2450    | NA                          |
| R01_cb13024_c1/flp0/373     | NA                       | R01_cb13024_c1/flp0/373     | NA                          | R01_cb13024_c1/flp0/373     |
| R01_cb12328_c2/flp1/1478    | NA                       | NA                          | NA                          | R01_cb12328_c2/flp1/1478    |
| R01_cb18409_c97/flp0/623    | NA                       | R01_cb18409_c97/flp0/623    | R01_cb18409_c97/flp0/623    | R01_cb18409_c97/flp0/623    |

|                              |                              |                              |                              |                             |
|------------------------------|------------------------------|------------------------------|------------------------------|-----------------------------|
| R01_cb2031_c3/flp0/3924      | NA                           | NA                           | NA                           | R01_cb2031_c3/flp0/3924     |
| R01_cb383_c43/flp0/575       | NA                           | R01_cb383_c43/flp0/575       | NA                           | R01_cb383_c43/flp0/575      |
| R01_cb8564_c52736/flp0/4819  | NA                           | NA                           | NA                           | R01_cb8564_c52736/flp0/4819 |
| R01_cb8941_c3/flp0/1925      | NA                           | NA                           | NA                           | R01_cb8941_c3/flp0/1925     |
| R01_cb8122_c5/flp0/2216      | NA                           | R01_cb8122_c5/flp0/2216      | NA                           | R01_cb8122_c5/flp0/2216     |
| R01_cb14472_c3/f3p0/860      | NA                           | NA                           | NA                           | R01_cb14472_c3/f3p0/860     |
| R01_cb5952_c1/flp0/2861      | NA                           | NA                           | NA                           | R01_cb5952_c1/flp0/2861     |
| R01_cb17276_c1/flp0/770      | NA                           | R01_cb17276_c1/flp0/770      | NA                           | R01_cb17276_c1/flp0/770     |
| R01_cb7552_c2/flp0/445       | R01_cb7552_c2/flp0/445       | R01_cb7552_c2/flp0/445       | R01_cb7552_c2/flp0/445       | R01_cb7552_c2/flp0/445      |
| R01_cb8564_c112330/flp0/2046 | R01_cb8564_c112330/flp0/2046 | R01_cb8564_c112330/flp0/2046 | R01_cb8564_c112330/flp0/2046 | NA                          |
| R01_cb8564_c122622/flp0/2900 | NA                           | R01_cb8564_c122622/flp0/2900 | NA                           | NA                          |
| R01_cb5857_c30/flp0/1721     | NA                           | R01_cb5857_c30/flp0/1721     | NA                           | NA                          |
| R01_cb10830_c0/flp0/1392     | NA                           | NA                           | NA                           | R01_cb10830_c0/flp0/1392    |
| R01_cb16913_c2/flp0/505      | NA                           | R01_cb16913_c2/flp0/505      | NA                           | NA                          |
| R01_cb2044_c2/flp0/2652      | NA                           | NA                           | NA                           | R01_cb2044_c2/flp0/2652     |
| R01_cb5625_c5/flp0/2328      | NA                           | R01_cb5625_c5/flp0/2328      | NA                           | R01_cb5625_c5/flp0/2328     |
| R01_cb12315_c3/flp1/1414     | NA                           | NA                           | NA                           | R01_cb12315_c3/flp1/1414    |
| R01_cb11414_c1/flp0/3896     | NA                           | R01_cb11414_c1/flp0/3896     | NA                           | R01_cb11414_c1/flp0/3896    |
| R01_cb8564_c123819/flp0/2118 | NA                           | R01_cb8564_c123819/flp0/2118 | R01_cb8564_c123819/flp0/2118 | NA                          |
| R01_cb18780_c10/flp3/5598    | NA                           | R01_cb18780_c10/flp3/5598    | NA                           | R01_cb18780_c10/flp3/5598   |
| R01_cb7380_c0/flp0/2635      | R01_cb7380_c0/flp0/2635      | R01_cb7380_c0/flp0/2635      | NA                           | R01_cb7380_c0/flp0/2635     |
| R01_cb13191_c3/flp0/1446     | NA                           | NA                           | NA                           | R01_cb13191_c3/flp0/1446    |
| R01_cb18456_c7229/flp1/587   | NA                           | R01_cb18456_c7229/flp1/587   | R01_cb18456_c7229/flp1/587   | R01_cb18456_c7229/flp1/587  |

|                                  |                            |                                  |                             |                                  |
|----------------------------------|----------------------------|----------------------------------|-----------------------------|----------------------------------|
| R01_cb8564_c127284/flp0/284<br>7 | NA                         | R01_cb8564_c127284/flp0/284<br>7 | NA                          | R01_cb8564_c127284/flp0/284<br>7 |
| R01_cb5896_c159/flp0/2030        | NA                         | R01_cb5896_c159/flp0/2030        | R01_cb5896_c159/flp0/2030   | R01_cb5896_c159/flp0/2030        |
| R01_cb14153_c0/flp0/1644         | NA                         | R01_cb14153_c0/flp0/1644         | NA                          | NA                               |
| R01_cb14402_c1/f2p0/1540         | NA                         | R01_cb14402_c1/f2p0/1540         | NA                          | R01_cb14402_c1/f2p0/1540         |
| R01_cb3483_c8/flp0/2848          | NA                         | NA                               | NA                          | R01_cb3483_c8/flp0/2848          |
| R01_cb12003_c145/flp0/1405       | NA                         | R01_cb12003_c145/flp0/1405       | NA                          | NA                               |
| R01_cb13880_c3/flp0/1846         | NA                         | R01_cb13880_c3/flp0/1846         | NA                          | NA                               |
| R01_cb18456_c1867/flp0/1690      | NA                         | R01_cb18456_c1867/flp0/1690      | NA                          | NA                               |
| R01_cb7114_c6/flp0/2697          | NA                         | NA                               | NA                          | R01_cb7114_c6/flp0/2697          |
| R01_cb17721_c2/flp0/1819         | NA                         | NA                               | NA                          | R01_cb17721_c2/flp0/1819         |
| R01_cb15828_c5/flp0/917          | NA                         | R01_cb15828_c5/flp0/917          | R01_cb15828_c5/flp0/917     | R01_cb15828_c5/flp0/917          |
| R01_cb18435_c1/flp0/671          | R01_cb18435_c1/flp0/671    | R01_cb18435_c1/flp0/671          | R01_cb18435_c1/flp0/671     | R01_cb18435_c1/flp0/671          |
| R01_cb2771_c1/f5p1/3188          | NA                         | NA                               | NA                          | R01_cb2771_c1/f5p1/3188          |
| R01_cb8483_c3/flp0/2470          | NA                         | NA                               | NA                          | R01_cb8483_c3/flp0/2470          |
| R01_cb8564_c4159/flp2/3687       | NA                         | NA                               | NA                          | R01_cb8564_c4159/flp2/3687       |
| R01_cb16370_c1/flp0/795          | NA                         | R01_cb16370_c1/flp0/795          | NA                          | R01_cb16370_c1/flp0/795          |
| R01_cb15082_c2/flp0/1819         | NA                         | R01_cb15082_c2/flp0/1819         | NA                          | NA                               |
| R01_cb13025_c13/flp0/1286        | NA                         | NA                               | NA                          | R01_cb13025_c13/flp0/1286        |
| R01_cb3500_c12/flp0/3013         | NA                         | NA                               | NA                          | R01_cb3500_c12/flp0/3013         |
| R01_cb8564_c19058/flp0/2206      | NA                         | R01_cb8564_c19058/flp0/2206      | R01_cb8564_c19058/flp0/2206 | R01_cb8564_c19058/flp0/2206      |
| R01_cb8104_c4/flp0/2404          | NA                         | NA                               | NA                          | R01_cb8104_c4/flp0/2404          |
| R01_cb17973_c55/flp0/1322        | NA                         | R01_cb17973_c55/flp0/1322        | NA                          | R01_cb17973_c55/flp0/1322        |
| R01_cb14108_c6/flp0/905          | R01_cb14108_c6/flp0/905    | NA                               | NA                          | R01_cb14108_c6/flp0/905          |
| R01_cb18456_c4952/flp0/570       | R01_cb18456_c4952/flp0/570 | R01_cb18456_c4952/flp0/570       | NA                          | R01_cb18456_c4952/flp0/570       |
| R01_cb12037_c15/flp0/966         | NA                         | NA                               | R01_cb12037_c15/flp0/966    | NA                               |

|                              |                             |                              |                            |                             |
|------------------------------|-----------------------------|------------------------------|----------------------------|-----------------------------|
| R01_cb11566_c3/flp0/481      | R01_cb11566_c3/flp0/481     | R01_cb11566_c3/flp0/481      | R01_cb11566_c3/flp0/481    | R01_cb11566_c3/flp0/481     |
| R01_cb15192_c4/flp0/352      | R01_cb15192_c4/flp0/352     | R01_cb15192_c4/flp0/352      | NA                         | R01_cb15192_c4/flp0/352     |
| R01_cb9313_c6/flp0/1413      | NA                          | R01_cb9313_c6/flp0/1413      | NA                         | NA                          |
| R01_cb18456_c3313/flp0/795   | NA                          | R01_cb18456_c3313/flp0/795   | NA                         | NA                          |
| R01_cb17309_c0/flp1/1552     | NA                          | NA                           | R01_cb17309_c0/flp1/1552   | R01_cb17309_c0/flp1/1552    |
| R01_cb12852_c1/flp1/1050     | NA                          | NA                           | R01_cb12852_c1/flp1/1050   | R01_cb12852_c1/flp1/1050    |
| R01_cb9108_c2/flp0/1666      | NA                          | NA                           | NA                         | R01_cb9108_c2/flp0/1666     |
| R01_cb14877_c1/f2p0/425      | R01_cb14877_c1/f2p0/425     | R01_cb14877_c1/f2p0/425      | R01_cb14877_c1/f2p0/425    | R01_cb14877_c1/f2p0/425     |
| R01_cb3854_c5/flp0/2584      | NA                          | NA                           | R01_cb3854_c5/flp0/2584    | NA                          |
| R01_cb3699_c8/flp0/3392      | NA                          | R01_cb3699_c8/flp0/3392      | NA                         | NA                          |
| R01_cb18569_c1/flp0/619      | R01_cb18569_c1/flp0/619     | R01_cb18569_c1/flp0/619      | NA                         | R01_cb18569_c1/flp0/619     |
| R01_cb843_c1/f5p1/2346       | NA                          | NA                           | NA                         | R01_cb843_c1/f5p1/2346      |
| R01_cb3120_c46/flp0/1970     | NA                          | NA                           | R01_cb3120_c46/flp0/1970   | NA                          |
| R01_cb8564_c116780/flp1/1900 | NA                          | R01_cb8564_c116780/flp1/1900 | NA                         | NA                          |
| R01_cb737_c50/flp0/1437      | R01_cb737_c50/flp0/1437     | R01_cb737_c50/flp0/1437      | NA                         | NA                          |
| R01_cb8564_c25092/flp0/4072  | NA                          | NA                           | NA                         | R01_cb8564_c25092/flp0/4072 |
| R01_cb17306_c0/flp1/984      | R01_cb17306_c0/flp1/984     | R01_cb17306_c0/flp1/984      | R01_cb17306_c0/flp1/984    | R01_cb17306_c0/flp1/984     |
| R01_cb6983_c1/flp0/2842      | NA                          | NA                           | NA                         | R01_cb6983_c1/flp0/2842     |
| R01_cb12830_c4/flp0/441      | R01_cb12830_c4/flp0/441     | R01_cb12830_c4/flp0/441      | R01_cb12830_c4/flp0/441    | R01_cb12830_c4/flp0/441     |
| R01_cb18456_c7449/flp0/310   | R01_cb18456_c7449/flp0/310  | R01_cb18456_c7449/flp0/310   | R01_cb18456_c7449/flp0/310 | R01_cb18456_c7449/flp0/310  |
| R01_cb4250_c2/flp0/4608      | NA                          | NA                           | NA                         | R01_cb4250_c2/flp0/4608     |
| R01_cb6480_c4/flp1/2665      | NA                          | NA                           | NA                         | R01_cb6480_c4/flp1/2665     |
| R01_cb5946_c15/flp0/1178     | NA                          | R01_cb5946_c15/flp0/1178     | NA                         | NA                          |
| R01_cb17131_c1/f2p0/537      | NA                          | R01_cb17131_c1/f2p0/537      | NA                         | NA                          |
| R01_cb8564_c112226/flp0/248  | R01_cb8564_c112226/flp0/248 | R01_cb8564_c112226/flp0/248  | NA                         | NA                          |



|                             |                         |                             |                         |                             |
|-----------------------------|-------------------------|-----------------------------|-------------------------|-----------------------------|
| 2                           | 82                      | 2                           |                         |                             |
| R01_cb16564_c0/flp0/801     | NA                      | R01_cb16564_c0/flp0/801     | R01_cb16564_c0/flp0/801 | R01_cb16564_c0/flp0/801     |
| R01_cb293_c3/flp0/2953      | NA                      | NA                          | NA                      | R01_cb293_c3/flp0/2953      |
| R01_cb14963_c4/flp0/602     | NA                      | R01_cb14963_c4/flp0/602     | NA                      | NA                          |
| R01_cb12360_c8/flp1/758     | NA                      | R01_cb12360_c8/flp1/758     | NA                      | NA                          |
| R01_cb13701_c0/f2p0/841     | NA                      | NA                          | NA                      | R01_cb13701_c0/f2p0/841     |
| R01_cb18526_c11/flp0/1551   | NA                      | R01_cb18526_c11/flp0/1551   | NA                      | R01_cb18526_c11/flp0/1551   |
| R01_cb8564_c74541/flp1/3268 | NA                      | R01_cb8564_c74541/flp1/3268 | NA                      | NA                          |
| R01_cb1077_c4/f6p0/3211     | NA                      | NA                          | NA                      | R01_cb1077_c4/f6p0/3211     |
| R01_cb3826_c13/flp0/488     | R01_cb3826_c13/flp0/488 | R01_cb3826_c13/flp0/488     | NA                      | R01_cb3826_c13/flp0/488     |
| R01_cb2022_c7/flp0/3946     | NA                      | NA                          | NA                      | R01_cb2022_c7/flp0/3946     |
| R01_cb12123_c1/f4p0/472     | NA                      | R01_cb12123_c1/f4p0/472     | R01_cb12123_c1/f4p0/472 | R01_cb12123_c1/f4p0/472     |
| R01_cb3732_c17/flp0/2194    | NA                      | NA                          | NA                      | R01_cb3732_c17/flp0/2194    |
| R01_cb8612_c0/flp0/2319     | R01_cb8612_c0/flp0/2319 | R01_cb8612_c0/flp0/2319     | R01_cb8612_c0/flp0/2319 | R01_cb8612_c0/flp0/2319     |
| R01_cb16991_c0/f2p1/604     | NA                      | R01_cb16991_c0/f2p1/604     | NA                      | R01_cb16991_c0/f2p1/604     |
| R01_cb12641_c13/flp0/926    | NA                      | NA                          | NA                      | R01_cb12641_c13/flp0/926    |
| R01_cb14566_c1/flp0/573     | R01_cb14566_c1/flp0/573 | R01_cb14566_c1/flp0/573     | R01_cb14566_c1/flp0/573 | R01_cb14566_c1/flp0/573     |
| R01_cb5659_c69/flp0/2199    | NA                      | NA                          | NA                      | R01_cb5659_c69/flp0/2199    |
| R01_cb12334_c0/f2p0/544     | NA                      | R01_cb12334_c0/f2p0/544     | NA                      | NA                          |
| R01_cb8564_c82138/flp0/4103 | NA                      | NA                          | NA                      | R01_cb8564_c82138/flp0/4103 |
| R01_cb10039_c4/flp0/1325    | NA                      | R01_cb10039_c4/flp0/1325    | NA                      | NA                          |
| R01_cb8514_c3/flp0/1154     | NA                      | NA                          | NA                      | R01_cb8514_c3/flp0/1154     |
| R01_cb3026_c2/f2p0/2050     | NA                      | R01_cb3026_c2/f2p0/2050     | NA                      | NA                          |
| R01_cb16369_c1/flp0/382     | R01_cb16369_c1/flp0/382 | R01_cb16369_c1/flp0/382     | NA                      | R01_cb16369_c1/flp0/382     |
| R01_cb15778_c2/flp0/1166    | NA                      | NA                          | NA                      | R01_cb15778_c2/flp0/1166    |
| R01_cb9517_c2/f2p1/2083     | NA                      | R01_cb9517_c2/f2p1/2083     | NA                      | NA                          |

|                             |                                  |                             |                             |                             |
|-----------------------------|----------------------------------|-----------------------------|-----------------------------|-----------------------------|
| R01_cb8564_c16263/flp0/2381 | R01_cb8564_c16263/flp0/2381<br>1 | R01_cb8564_c16263/flp0/2381 | R01_cb8564_c16263/flp0/2381 | R01_cb8564_c16263/flp0/2381 |
| R01_cb8564_c84338/flp0/2695 | NA                               | R01_cb8564_c84338/flp0/2695 | NA                          | R01_cb8564_c84338/flp0/2695 |
| R01_cb8564_c14856/flp0/3558 | NA                               | R01_cb8564_c14856/flp0/3558 | NA                          | NA                          |
| R01_cb11706_c1/flp0/2387    | NA                               | R01_cb11706_c1/flp0/2387    | R01_cb11706_c1/flp0/2387    | R01_cb11706_c1/flp0/2387    |
| R01_cb11121_c1/flp0/3192    | NA                               | NA                          | NA                          | R01_cb11121_c1/flp0/3192    |
| R01_cb14341_c1/flp0/682     | R01_cb14341_c1/flp0/682          | R01_cb14341_c1/flp0/682     | R01_cb14341_c1/flp0/682     | R01_cb14341_c1/flp0/682     |
| R01_cb8564_c3055/flp0/1930  | R01_cb8564_c3055/flp0/1930       | R01_cb8564_c3055/flp0/1930  | R01_cb8564_c3055/flp0/1930  | R01_cb8564_c3055/flp0/1930  |
| R01_cb4691_c3/flp0/999      | NA                               | R01_cb4691_c3/flp0/999      | NA                          | NA                          |
| R01_cb15958_c2/flp0/1721    | NA                               | R01_cb15958_c2/flp0/1721    | NA                          | NA                          |
| R01_cb3763_c14/flp0/3662    | NA                               | NA                          | NA                          | R01_cb3763_c14/flp0/3662    |
| R01_cb12585_c14/flp0/778    | NA                               | R01_cb12585_c14/flp0/778    | NA                          | NA                          |
| R01_cb3359_c0/f4p1/3589     | NA                               | NA                          | R01_cb3359_c0/f4p1/3589     | R01_cb3359_c0/f4p1/3589     |
| R01_cb17756_c12/flp0/1766   | R01_cb17756_c12/flp0/1766        | R01_cb17756_c12/flp0/1766   | R01_cb17756_c12/flp0/1766   | R01_cb17756_c12/flp0/1766   |
| R01_cb1981_c18/flp0/2047    | NA                               | NA                          | NA                          | R01_cb1981_c18/flp0/2047    |
| R01_cb11506_c1/flp0/3589    | R01_cb11506_c1/flp0/3589         | R01_cb11506_c1/flp0/3589    | R01_cb11506_c1/flp0/3589    | NA                          |
| R01_cb18724_c0/flp0/5140    | NA                               | R01_cb18724_c0/flp0/5140    | NA                          | R01_cb18724_c0/flp0/5140    |
| R01_cb2602_c5/flp0/2227     | NA                               | NA                          | NA                          | R01_cb2602_c5/flp0/2227     |
| R01_cb8564_c91930/flp0/3149 | NA                               | R01_cb8564_c91930/flp0/3149 | NA                          | NA                          |
| R01_cb8513_c0/flp0/2274     | NA                               | NA                          | NA                          | R01_cb8513_c0/flp0/2274     |
| R01_cb5558_c6/flp0/1048     | NA                               | R01_cb5558_c6/flp0/1048     | NA                          | NA                          |
| R01_cb16799_c2/flp0/744     | NA                               | NA                          | NA                          | R01_cb16799_c2/flp0/744     |
| R01_cb8564_c51952/flp0/4840 | NA                               | R01_cb8564_c51952/flp0/4840 | R01_cb8564_c51952/flp0/4840 | R01_cb8564_c51952/flp0/4840 |
| R01_cb8564_c33746/f6p0/3485 | R01_cb8564_c33746/f6p0/3485<br>5 | R01_cb8564_c33746/f6p0/3485 | R01_cb8564_c33746/f6p0/3485 | R01_cb8564_c33746/f6p0/3485 |
| R01_cb16540_c5/f2p0/583     | NA                               | NA                          | R01_cb16540_c5/f2p0/583     | R01_cb16540_c5/f2p0/583     |

|                                  |                          |                                  |                            |                             |
|----------------------------------|--------------------------|----------------------------------|----------------------------|-----------------------------|
| R01_cb8564_c121658/flp0/249<br>6 | NA                       | R01_cb8564_c121658/flp0/249<br>6 | NA                         | NA                          |
| R01_cb18496_c0/f2p0/470          | R01_cb18496_c0/f2p0/470  | NA                               | NA                         | R01_cb18496_c0/f2p0/470     |
| R01_cb17331_c0/flp0/565          | NA                       | NA                               | R01_cb17331_c0/flp0/565    | R01_cb17331_c0/flp0/565     |
| R01_cb8564_c19120/flp0/3323      | NA                       | R01_cb8564_c19120/flp0/3323      | NA                         | NA                          |
| R01_cb13453_c14/flp0/1521        | NA                       | NA                               | NA                         | R01_cb13453_c14/flp0/1521   |
| R01_cb8564_c15799/flp0/2924      | NA                       | R01_cb8564_c15799/flp0/2924      | NA                         | R01_cb8564_c15799/flp0/2924 |
| R01_cb18456_c5635/flp0/508       | NA                       | R01_cb18456_c5635/flp0/508       | NA                         | R01_cb18456_c5635/flp0/508  |
| R01_cb17371_c2/flp0/591          | R01_cb17371_c2/flp0/591  | R01_cb17371_c2/flp0/591          | R01_cb17371_c2/flp0/591    | R01_cb17371_c2/flp0/591     |
| R01_cb15585_c20/flp0/756         | R01_cb15585_c20/flp0/756 | R01_cb15585_c20/flp0/756         | NA                         | NA                          |
| R01_cb8900_c2/flp0/2007          | NA                       | NA                               | NA                         | R01_cb8900_c2/flp0/2007     |
| R01_cb4657_c16/flp0/4283         | NA                       | NA                               | NA                         | R01_cb4657_c16/flp0/4283    |
| R01_cb3832_c4/flp0/2183          | NA                       | R01_cb3832_c4/flp0/2183          | NA                         | NA                          |
| R01_cb7023_c0/f2p1/2542          | NA                       | R01_cb7023_c0/f2p1/2542          | R01_cb7023_c0/f2p1/2542    | R01_cb7023_c0/f2p1/2542     |
| R01_cb15114_c1/flp0/970          | NA                       | R01_cb15114_c1/flp0/970          | NA                         | R01_cb15114_c1/flp0/970     |
| R01_cb8564_c4620/flp2/2929       | NA                       | R01_cb8564_c4620/flp2/2929       | R01_cb8564_c4620/flp2/2929 | R01_cb8564_c4620/flp2/2929  |
| R01_cb15005_c6/flp0/336          | R01_cb15005_c6/flp0/336  | R01_cb15005_c6/flp0/336          | R01_cb15005_c6/flp0/336    | R01_cb15005_c6/flp0/336     |
| R01_cb12757_c1/flp0/944          | NA                       | NA                               | NA                         | R01_cb12757_c1/flp0/944     |
| R01_cb8335_c16/flp0/2566         | NA                       | NA                               | NA                         | R01_cb8335_c16/flp0/2566    |
| R01_cb9793_c2/f2p2/1955          | NA                       | NA                               | NA                         | R01_cb9793_c2/f2p2/1955     |
| R01_cb10082_c4/flp0/2999         | NA                       | R01_cb10082_c4/flp0/2999         | NA                         | NA                          |
| R01_cb1085_c11/flp1/4093         | NA                       | NA                               | NA                         | R01_cb1085_c11/flp1/4093    |
| R01_cb6602_c41/flp1/2258         | NA                       | NA                               | NA                         | R01_cb6602_c41/flp1/2258    |
| R01_cb2804_c308/flp0/585         | R01_cb2804_c308/flp0/585 | R01_cb2804_c308/flp0/585         | R01_cb2804_c308/flp0/585   | R01_cb2804_c308/flp0/585    |
| R01_cb12114_c8/flp0/1430         | NA                       | NA                               | NA                         | R01_cb12114_c8/flp0/1430    |
| R01_cb10363_c0/flp0/609          | NA                       | R01_cb10363_c0/flp0/609          | NA                         | R01_cb10363_c0/flp0/609     |

|                             |                            |                             |                            |                             |
|-----------------------------|----------------------------|-----------------------------|----------------------------|-----------------------------|
| R01_cb15018_c3/flp1/600     | NA                         | R01_cb15018_c3/flp1/600     | R01_cb15018_c3/flp1/600    | R01_cb15018_c3/flp1/600     |
| R01_cb18456_c6114/flp0/556  | NA                         | NA                          | R01_cb18456_c6114/flp0/556 | NA                          |
| R01_cb18456_c7278/flp0/932  | R01_cb18456_c7278/flp0/932 | R01_cb18456_c7278/flp0/932  | R01_cb18456_c7278/flp0/932 | R01_cb18456_c7278/flp0/932  |
| R01_cb1056_c0/flp0/4488     | NA                         | R01_cb1056_c0/flp0/4488     | NA                         | NA                          |
| R01_cb5229_c4/flp0/2716     | NA                         | R01_cb5229_c4/flp0/2716     | NA                         | R01_cb5229_c4/flp0/2716     |
| R01_cb10306_c5/flp0/3253    | R01_cb10306_c5/flp0/3253   | R01_cb10306_c5/flp0/3253    | NA                         | R01_cb10306_c5/flp0/3253    |
| R01_cb18456_c5825/flp0/959  | NA                         | R01_cb18456_c5825/flp0/959  | NA                         | NA                          |
| R01_cb18526_c9/flp0/701     | NA                         | R01_cb18526_c9/flp0/701     | NA                         | NA                          |
| R01_cb6194_c3/flp0/2912     | NA                         | R01_cb6194_c3/flp0/2912     | NA                         | NA                          |
| R01_cb18456_c2537/flp0/1445 | NA                         | R01_cb18456_c2537/flp0/1445 | NA                         | NA                          |
| R01_cb14620_c1/flp0/1701    | NA                         | NA                          | R01_cb14620_c1/flp0/1701   | R01_cb14620_c1/flp0/1701    |
| R01_cb5952_c0/f2p0/1065     | NA                         | NA                          | NA                         | R01_cb5952_c0/f2p0/1065     |
| R01_cb18241_c2/flp0/1042    | R01_cb18241_c2/flp0/1042   | R01_cb18241_c2/flp0/1042    | NA                         | NA                          |
| R01_cb8564_c4193/flp0/3949  | NA                         | R01_cb8564_c4193/flp0/3949  | NA                         | NA                          |
| R01_cb8564_c19221/f2p0/2424 | NA                         | NA                          | NA                         | R01_cb8564_c19221/f2p0/2424 |
| R01_cb13601_c1/f2p0/943     | NA                         | NA                          | NA                         | R01_cb13601_c1/f2p0/943     |
| R01_cb16910_c1/flp0/1331    | R01_cb16910_c1/flp0/1331   | NA                          | NA                         | R01_cb16910_c1/flp0/1331    |
| R01_cb8564_c74067/flp0/3829 | NA                         | R01_cb8564_c74067/flp0/3829 | NA                         | NA                          |
| R01_cb10443_c0/flp0/1365    | NA                         | R01_cb10443_c0/flp0/1365    | NA                         | NA                          |
| R01_cb15963_c3/flp0/736     | NA                         | NA                          | R01_cb15963_c3/flp0/736    | NA                          |
| R01_cb4952_c3/flp0/2896     | NA                         | NA                          | NA                         | R01_cb4952_c3/flp0/2896     |
| R01_cb13038_c0/flp0/1234    | NA                         | R01_cb13038_c0/flp0/1234    | NA                         | NA                          |
| R01_cb8564_c111470/flp0/231 | NA                         | R01_cb8564_c111470/flp0/231 | NA                         | R01_cb8564_c111470/flp0/231 |
| 9                           |                            | 9                           |                            | 9                           |
| R01_cb15060_c0/flp0/1608    | NA                         | NA                          | NA                         | R01_cb15060_c0/flp0/1608    |
| R01_cb10454_c16/flp0/1092   | NA                         | R01_cb10454_c16/flp0/1092   | NA                         | R01_cb10454_c16/flp0/1092   |

|                             |                            |                             |                             |                             |
|-----------------------------|----------------------------|-----------------------------|-----------------------------|-----------------------------|
| R01_cb13610_c2/flp0/757     | NA                         | R01_cb13610_c2/flp0/757     | NA                          | NA                          |
| R01_cb14896_c1/flp1/1836    | R01_cb14896_c1/flp1/1836   | R01_cb14896_c1/flp1/1836    | R01_cb14896_c1/flp1/1836    | R01_cb14896_c1/flp1/1836    |
| R01_cb8364_c2/flp0/2377     | R01_cb8364_c2/flp0/2377    | R01_cb8364_c2/flp0/2377     | R01_cb8364_c2/flp0/2377     | R01_cb8364_c2/flp0/2377     |
| R01_cb8564_c91280/flp0/1967 | NA                         | NA                          | NA                          | R01_cb8564_c91280/flp0/1967 |
| R01_cb8564_c44954/flp0/2471 | NA                         | R01_cb8564_c44954/flp0/2471 | NA                          | R01_cb8564_c44954/flp0/2471 |
| R01_cb12240_c8/flp0/579     | R01_cb12240_c8/flp0/579    | R01_cb12240_c8/flp0/579     | NA                          | NA                          |
| R01_cb10087_c2/flp3/1128    | NA                         | R01_cb10087_c2/flp3/1128    | NA                          | NA                          |
| R01_cb12191_c5/flp0/713     | NA                         | R01_cb12191_c5/flp0/713     | NA                          | R01_cb12191_c5/flp0/713     |
| R01_cb10024_c332/flp0/681   | NA                         | NA                          | R01_cb10024_c332/flp0/681   | NA                          |
| R01_cb18655_c12/flp0/5964   | NA                         | NA                          | NA                          | R01_cb18655_c12/flp0/5964   |
| R01_cb14286_c4/flp0/1200    | NA                         | R01_cb14286_c4/flp0/1200    | NA                          | R01_cb14286_c4/flp0/1200    |
| R01_cb3120_c52/flp1/2585    | NA                         | R01_cb3120_c52/flp1/2585    | NA                          | NA                          |
| R01_cb7579_c0/flp0/2597     | NA                         | NA                          | NA                          | R01_cb7579_c0/flp0/2597     |
| R01_cb5475_c5/flp0/2918     | NA                         | R01_cb5475_c5/flp0/2918     | NA                          | NA                          |
| R01_cb18456_c2288/flp0/635  | R01_cb18456_c2288/flp0/635 | R01_cb18456_c2288/flp0/635  | R01_cb18456_c2288/flp0/635  | R01_cb18456_c2288/flp0/635  |
| R01_cb8564_c12586/flp0/2756 | NA                         | R01_cb8564_c12586/flp0/2756 | NA                          | R01_cb8564_c12586/flp0/2756 |
| R01_cb5595_c34/flp0/3013    | NA                         | R01_cb5595_c34/flp0/3013    | NA                          | R01_cb5595_c34/flp0/3013    |
| R01_cb3558_c13/flp0/2716    | NA                         | NA                          | NA                          | R01_cb3558_c13/flp0/2716    |
| R01_cb10694_c0/f2p1/575     | NA                         | NA                          | NA                          | R01_cb10694_c0/f2p1/575     |
| R01_cb480_c5/flp0/5296      | NA                         | NA                          | NA                          | R01_cb480_c5/flp0/5296      |
| R01_cb3564_c25/flp1/3034    | NA                         | NA                          | NA                          | R01_cb3564_c25/flp1/3034    |
| R01_cb12373_c3/flp0/958     | R01_cb12373_c3/flp0/958    | R01_cb12373_c3/flp0/958     | R01_cb12373_c3/flp0/958     | R01_cb12373_c3/flp0/958     |
| R01_cb10723_c1/f2p0/714     | NA                         | NA                          | NA                          | R01_cb10723_c1/f2p0/714     |
| R01_cb15574_c4/flp0/502     | NA                         | NA                          | R01_cb15574_c4/flp0/502     | R01_cb15574_c4/flp0/502     |
| R01_cb8564_c21771/flp0/3179 | NA                         | NA                          | R01_cb8564_c21771/flp0/3179 | R01_cb8564_c21771/flp0/3179 |
| R01_cb7303_c12/flp0/2436    | NA                         | NA                          | NA                          | R01_cb7303_c12/flp0/2436    |

|                                  |                            |                                  |                                  |                                  |
|----------------------------------|----------------------------|----------------------------------|----------------------------------|----------------------------------|
| R01_cb8564_c3799/flp0/2802       | R01_cb8564_c3799/flp0/2802 | R01_cb8564_c3799/flp0/2802       | NA                               | NA                               |
| R01_cb17580_c1/flp0/1793         | NA                         | NA                               | NA                               | R01_cb17580_c1/flp0/1793         |
| R01_cb1247_c1/flp0/3154          | NA                         | R01_cb1247_c1/flp0/3154          | NA                               | NA                               |
| R01_cb8564_c156200/flp3/308<br>7 | NA                         | NA                               | NA                               | R01_cb8564_c156200/flp3/308<br>7 |
| R01_cb4639_c7/flp0/2470          | NA                         | R01_cb4639_c7/flp0/2470          | NA                               | R01_cb4639_c7/flp0/2470          |
| R01_cb8564_c19386/f2p0/3961      | NA                         | NA                               | NA                               | R01_cb8564_c19386/f2p0/3961      |
| R01_cb11307_c4/flp0/704          | R01_cb11307_c4/flp0/704    | R01_cb11307_c4/flp0/704          | R01_cb11307_c4/flp0/704          | R01_cb11307_c4/flp0/704          |
| R01_cb6829_c11/flp0/360          | R01_cb6829_c11/flp0/360    | R01_cb6829_c11/flp0/360          | R01_cb6829_c11/flp0/360          | R01_cb6829_c11/flp0/360          |
| R01_cb3088_c2/flp0/3439          | NA                         | R01_cb3088_c2/flp0/3439          | R01_cb3088_c2/flp0/3439          | R01_cb3088_c2/flp0/3439          |
| R01_cb3445_c2/flp1/3625          | NA                         | NA                               | NA                               | R01_cb3445_c2/flp1/3625          |
| R01_cb6285_c1/flp0/2620          | NA                         | R01_cb6285_c1/flp0/2620          | R01_cb6285_c1/flp0/2620          | R01_cb6285_c1/flp0/2620          |
| R01_cb4478_c0/flp0/3336          | NA                         | NA                               | NA                               | R01_cb4478_c0/flp0/3336          |
| R01_cb2870_c11/flp1/2718         | NA                         | NA                               | NA                               | R01_cb2870_c11/flp1/2718         |
| R01_cb2385_c6/flp0/1818          | NA                         | R01_cb2385_c6/flp0/1818          | NA                               | NA                               |
| R01_cb11246_c0/flp0/772          | R01_cb11246_c0/flp0/772    | R01_cb11246_c0/flp0/772          | NA                               | NA                               |
| R01_cb1203_c12/flp2/4460         | NA                         | NA                               | NA                               | R01_cb1203_c12/flp2/4460         |
| R01_cb9791_c0/f4p0/1965          | NA                         | R01_cb9791_c0/f4p0/1965          | NA                               | R01_cb9791_c0/f4p0/1965          |
| R01_cb7219_c7/flp2/2549          | NA                         | NA                               | NA                               | R01_cb7219_c7/flp2/2549          |
| R01_cb13497_c5/flp0/1729         | NA                         | R01_cb13497_c5/flp0/1729         | NA                               | R01_cb13497_c5/flp0/1729         |
| R01_cb15959_c8/flp0/977          | R01_cb15959_c8/flp0/977    | R01_cb15959_c8/flp0/977          | NA                               | R01_cb15959_c8/flp0/977          |
| R01_cb2761_c7/flp0/3531          | NA                         | R01_cb2761_c7/flp0/3531          | NA                               | NA                               |
| R01_cb2839_c6/flp0/5031          | NA                         | R01_cb2839_c6/flp0/5031          | NA                               | NA                               |
| R01_cb8564_c127692/flp0/218<br>2 | NA                         | R01_cb8564_c127692/flp0/218<br>2 | R01_cb8564_c127692/flp0/218<br>2 | R01_cb8564_c127692/flp0/218<br>2 |
| R01_cb10648_c2/flp0/2342         | R01_cb10648_c2/flp0/2342   | R01_cb10648_c2/flp0/2342         | R01_cb10648_c2/flp0/2342         | R01_cb10648_c2/flp0/2342         |

|                             |                            |                             |                             |                             |
|-----------------------------|----------------------------|-----------------------------|-----------------------------|-----------------------------|
| R01_cb18629_c1/flp0/1411    | NA                         | R01_cb18629_c1/flp0/1411    | R01_cb18629_c1/flp0/1411    | R01_cb18629_c1/flp0/1411    |
| R01_cb9664_c2/flp0/2566     | NA                         | NA                          | R01_cb9664_c2/flp0/2566     | R01_cb9664_c2/flp0/2566     |
| R01_cb8564_c82067/flp0/2959 | NA                         | NA                          | NA                          | R01_cb8564_c82067/flp0/2959 |
| R01_cb14527_c0/f2p0/796     | NA                         | R01_cb14527_c0/f2p0/796     | R01_cb14527_c0/f2p0/796     | R01_cb14527_c0/f2p0/796     |
| R01_cb5900_c76/flp0/3351    | R01_cb5900_c76/flp0/3351   | R01_cb5900_c76/flp0/3351    | NA                          | R01_cb5900_c76/flp0/3351    |
| R01_cb18456_c6678/flp0/522  | R01_cb18456_c6678/flp0/522 | R01_cb18456_c6678/flp0/522  | R01_cb18456_c6678/flp0/522  | R01_cb18456_c6678/flp0/522  |
| R01_cb8564_c7790/f7p0/2258  | NA                         | R01_cb8564_c7790/f7p0/2258  | R01_cb8564_c7790/f7p0/2258  | R01_cb8564_c7790/f7p0/2258  |
| R01_cb8991_c14/flp0/1263    | NA                         | NA                          | NA                          | R01_cb8991_c14/flp0/1263    |
| R01_cb2421_c1/flp0/2510     | NA                         | R01_cb2421_c1/flp0/2510     | R01_cb2421_c1/flp0/2510     | NA                          |
| R01_cb13064_c6/flp0/312     | R01_cb13064_c6/flp0/312    | R01_cb13064_c6/flp0/312     | R01_cb13064_c6/flp0/312     | R01_cb13064_c6/flp0/312     |
| R01_cb8564_c85011/flp0/2932 | NA                         | R01_cb8564_c85011/flp0/2932 | NA                          | R01_cb8564_c85011/flp0/2932 |
| R01_cb7030_c28/flp0/549     | NA                         | R01_cb7030_c28/flp0/549     | NA                          | NA                          |
| R01_cb18456_c6220/flp0/687  | R01_cb18456_c6220/flp0/687 | R01_cb18456_c6220/flp0/687  | NA                          | R01_cb18456_c6220/flp0/687  |
| R01_cb2104_c6/flp0/3853     | NA                         | R01_cb2104_c6/flp0/3853     | R01_cb2104_c6/flp0/3853     | R01_cb2104_c6/flp0/3853     |
| R01_cb8564_c51150/flp0/3341 | NA                         | NA                          | NA                          | R01_cb8564_c51150/flp0/3341 |
| R01_cb13178_c5/f2p0/540     | NA                         | R01_cb13178_c5/f2p0/540     | NA                          | NA                          |
| R01_cb8564_c1057/flp0/2347  | NA                         | R01_cb8564_c1057/flp0/2347  | NA                          | R01_cb8564_c1057/flp0/2347  |
| R01_cb11733_c0/flp0/1333    | NA                         | NA                          | NA                          | R01_cb11733_c0/flp0/1333    |
| R01_cb3992_c8/fl3p0/883     | NA                         | NA                          | NA                          | R01_cb3992_c8/fl3p0/883     |
| R01_cb8564_c20099/flp0/3387 | NA                         | R01_cb8564_c20099/flp0/3387 | R01_cb8564_c20099/flp0/3387 | R01_cb8564_c20099/flp0/3387 |
| R01_cb10872_c1/flp0/2992    | NA                         | R01_cb10872_c1/flp0/2992    | NA                          | NA                          |
| R01_cb7334_c13/flp0/1691    | NA                         | NA                          | NA                          | R01_cb7334_c13/flp0/1691    |
| R01_cb8564_c21367/flp0/2871 | NA                         | R01_cb8564_c21367/flp0/2871 | NA                          | NA                          |
| R01_cb10272_c11/flp0/2538   | NA                         | NA                          | NA                          | R01_cb10272_c11/flp0/2538   |
| R01_cb6507_c11/flp0/1009    | NA                         | NA                          | NA                          | R01_cb6507_c11/flp0/1009    |
| R01_cb2018_c2/flp0/1820     | NA                         | R01_cb2018_c2/flp0/1820     | NA                          | NA                          |

|                             |                            |                             |                             |                             |
|-----------------------------|----------------------------|-----------------------------|-----------------------------|-----------------------------|
| R01_cb3500_c18/f1p0/2999    | NA                         | NA                          | NA                          | R01_cb3500_c18/f1p0/2999    |
| R01_cb9504_c0/f2p0/1821     | NA                         | R01_cb9504_c0/f2p0/1821     | NA                          | NA                          |
| R01_cb3941_c26/f1p0/2346    | NA                         | NA                          | NA                          | R01_cb3941_c26/f1p0/2346    |
| R01_cb9530_c3/f1p0/1994     | NA                         | NA                          | NA                          | R01_cb9530_c3/f1p0/1994     |
| R01_cb8564_c81762/f1p0/3842 | NA                         | R01_cb8564_c81762/f1p0/3842 | NA                          | NA                          |
| R01_cb8564_c75981/f2p0/4046 | NA                         | R01_cb8564_c75981/f2p0/4046 | NA                          | NA                          |
| R01_cb8564_c107755/f9p0/214 | NA                         | R01_cb8564_c107755/f9p0/214 | R01_cb8564_c107755/f9p0/214 | R01_cb8564_c107755/f9p0/214 |
| 1                           | NA                         | 1                           | 1                           | 1                           |
| R01_cb6802_c12/f1p0/3195    | NA                         | R01_cb6802_c12/f1p0/3195    | R01_cb6802_c12/f1p0/3195    | NA                          |
| R01_cb10641_c2/f1p0/1760    | NA                         | NA                          | NA                          | R01_cb10641_c2/f1p0/1760    |
| R01_cb7992_c2/f1p0/2126     | NA                         | NA                          | NA                          | R01_cb7992_c2/f1p0/2126     |
| R01_cb8564_c4585/f2p0/3415  | R01_cb8564_c4585/f2p0/3415 | R01_cb8564_c4585/f2p0/3415  | NA                          | R01_cb8564_c4585/f2p0/3415  |
| R01_cb18456_c2316/f1p2/711  | NA                         | R01_cb18456_c2316/f1p2/711  | NA                          | R01_cb18456_c2316/f1p2/711  |
| R01_cb17248_c2/f1p0/360     | NA                         | R01_cb17248_c2/f1p0/360     | R01_cb17248_c2/f1p0/360     | R01_cb17248_c2/f1p0/360     |
| R01_cb17712_c1/f1p0/481     | NA                         | R01_cb17712_c1/f1p0/481     | NA                          | NA                          |
| R01_cb1178_c8/f1p0/2736     | NA                         | NA                          | NA                          | R01_cb1178_c8/f1p0/2736     |
| R01_cb4576_c41/f1p0/3473    | NA                         | NA                          | NA                          | R01_cb4576_c41/f1p0/3473    |
| R01_cb8564_c5090/f1p2/2223  | NA                         | NA                          | NA                          | R01_cb8564_c5090/f1p2/2223  |
| R01_cb11286_c1/f1p0/1925    | NA                         | R01_cb11286_c1/f1p0/1925    | NA                          | NA                          |
| R01_cb7219_c9/f1p0/2265     | NA                         | NA                          | NA                          | R01_cb7219_c9/f1p0/2265     |
| R01_cb10764_c4/f1p0/723     | R01_cb10764_c4/f1p0/723    | R01_cb10764_c4/f1p0/723     | NA                          | NA                          |
| R01_cb480_c1/f1p0/3737      | NA                         | NA                          | NA                          | R01_cb480_c1/f1p0/3737      |
| R01_cb9833_c1/f1p0/3484     | NA                         | R01_cb9833_c1/f1p0/3484     | R01_cb9833_c1/f1p0/3484     | NA                          |
| R01_cb7615_c0/f1p0/2592     | NA                         | R01_cb7615_c0/f1p0/2592     | NA                          | NA                          |
| R01_cb11569_c2/f1p0/1187    | R01_cb11569_c2/f1p0/1187   | R01_cb11569_c2/f1p0/1187    | R01_cb11569_c2/f1p0/1187    | R01_cb11569_c2/f1p0/1187    |
| R01_cb454_c4/f3p0/2268      | NA                         | NA                          | NA                          | R01_cb454_c4/f3p0/2268      |



|                              |                            |                             |                             |                              |
|------------------------------|----------------------------|-----------------------------|-----------------------------|------------------------------|
| R01_cb18780_c2/flp26/7582    | NA                         | R01_cb18780_c2/flp26/7582   | NA                          | NA                           |
| R01_cb13178_c28/flp0/534     | NA                         | R01_cb13178_c28/flp0/534    | NA                          | NA                           |
| R01_cb13598_c0/flp0/614      | NA                         | R01_cb13598_c0/flp0/614     | NA                          | R01_cb13598_c0/flp0/614      |
| R01_cb12286_c1/fl7p5/881     | NA                         | R01_cb12286_c1/fl7p5/881    | NA                          | NA                           |
| R01_cb8564_c1356/flp0/2384   | NA                         | NA                          | NA                          | R01_cb8564_c1356/flp0/2384   |
| R01_cb12587_c13/flp0/1569    | NA                         | NA                          | NA                          | R01_cb12587_c13/flp0/1569    |
| R01_cb8660_c13/flp0/1379     | NA                         | NA                          | NA                          | R01_cb8660_c13/flp0/1379     |
| R01_cb12616_c3/flp1/1188     | NA                         | NA                          | NA                          | R01_cb12616_c3/flp1/1188     |
| R01_cb12421_c60/flp0/507     | R01_cb12421_c60/flp0/507   | R01_cb12421_c60/flp0/507    | R01_cb12421_c60/flp0/507    | R01_cb12421_c60/flp0/507     |
| R01_cb16991_c2/flp0/669      | R01_cb16991_c2/flp0/669    | R01_cb16991_c2/flp0/669     | R01_cb16991_c2/flp0/669     | R01_cb16991_c2/flp0/669      |
| R01_cb12321_c846/flp0/381    | R01_cb12321_c846/flp0/381  | R01_cb12321_c846/flp0/381   | NA                          | NA                           |
| R01_cb12421_c64/flp0/570     | NA                         | R01_cb12421_c64/flp0/570    | NA                          | NA                           |
| R01_cb18018_c1/flp0/456      | R01_cb18018_c1/flp0/456    | R01_cb18018_c1/flp0/456     | R01_cb18018_c1/flp0/456     | R01_cb18018_c1/flp0/456      |
| R01_cb8564_c115326/flp0/2118 | NA                         | NA                          | NA                          | R01_cb8564_c115326/flp0/2118 |
| R01_cb8564_c18936/flp0/2700  | NA                         | R01_cb8564_c18936/flp0/2700 | R01_cb8564_c18936/flp0/2700 | R01_cb8564_c18936/flp0/2700  |
| R01_cb6082_c2/flp2/2709      | NA                         | R01_cb6082_c2/flp2/2709     | NA                          | NA                           |
| R01_cb6802_c8/flp0/2292      | NA                         | R01_cb6802_c8/flp0/2292     | NA                          | R01_cb6802_c8/flp0/2292      |
| R01_cb10689_c1/flp0/3785     | NA                         | NA                          | NA                          | R01_cb10689_c1/flp0/3785     |
| R01_cb8564_c15803/f3p0/2256  | NA                         | NA                          | NA                          | R01_cb8564_c15803/f3p0/2256  |
| R01_cb11721_c1/flp0/2425     | NA                         | R01_cb11721_c1/flp0/2425    | R01_cb11721_c1/flp0/2425    | R01_cb11721_c1/flp0/2425     |
| R01_cb18409_c44/flp0/830     | R01_cb18409_c44/flp0/830   | R01_cb18409_c44/flp0/830    | R01_cb18409_c44/flp0/830    | R01_cb18409_c44/flp0/830     |
| R01_cb11499_c1/flp0/2061     | NA                         | NA                          | NA                          | R01_cb11499_c1/flp0/2061     |
| R01_cb8328_c5/flp0/916       | R01_cb8328_c5/flp0/916     | R01_cb8328_c5/flp0/916      | NA                          | NA                           |
| R01_cb8564_c4100/flp0/2890   | R01_cb8564_c4100/flp0/2890 | R01_cb8564_c4100/flp0/2890  | R01_cb8564_c4100/flp0/2890  | NA                           |
| R01_cb12421_c24/flp0/708     | NA                         | R01_cb12421_c24/flp0/708    | NA                          | NA                           |

|                              |                           |                              |                             |                             |
|------------------------------|---------------------------|------------------------------|-----------------------------|-----------------------------|
| R01_cb5514_c2/flp1/2935      | NA                        | R01_cb5514_c2/flp1/2935      | NA                          | R01_cb5514_c2/flp1/2935     |
| R01_cb17363_c6/flp1/692      | R01_cb17363_c6/flp1/692   | R01_cb17363_c6/flp1/692      | R01_cb17363_c6/flp1/692     | R01_cb17363_c6/flp1/692     |
| R01_cb11793_c1/flp0/3842     | NA                        | R01_cb11793_c1/flp0/3842     | NA                          | R01_cb11793_c1/flp0/3842    |
| R01_cb18471_c1/flp0/1001     | NA                        | NA                           | NA                          | R01_cb18471_c1/flp0/1001    |
| R01_cb8564_c89159/f2p0/2212  | NA                        | R01_cb8564_c89159/f2p0/2212  | R01_cb8564_c89159/f2p0/2212 | R01_cb8564_c89159/f2p0/2212 |
| R01_cb5536_c1/flp0/2994      | NA                        | R01_cb5536_c1/flp0/2994      | NA                          | NA                          |
| R01_cb5659_c83/flp0/2549     | NA                        | NA                           | NA                          | R01_cb5659_c83/flp0/2549    |
| R01_cb8564_c69134/f2p0/1990  | NA                        | R01_cb8564_c69134/f2p0/1990  | R01_cb8564_c69134/f2p0/1990 | R01_cb8564_c69134/f2p0/1990 |
| R01_cb3997_c5/flp0/1500      | NA                        | NA                           | NA                          | R01_cb3997_c5/flp0/1500     |
| R01_cb9154_c7/flp0/1653      | NA                        | NA                           | NA                          | R01_cb9154_c7/flp0/1653     |
| R01_cb2445_c2/f2p0/3403      | NA                        | NA                           | NA                          | R01_cb2445_c2/f2p0/3403     |
| R01_cb7345_c24/flp0/492      | NA                        | NA                           | NA                          | R01_cb7345_c24/flp0/492     |
| R01_cb17636_c2/flp0/1147     | NA                        | R01_cb17636_c2/flp0/1147     | NA                          | NA                          |
| R01_cb18456_c7485/flp0/575   | NA                        | R01_cb18456_c7485/flp0/575   | R01_cb18456_c7485/flp0/575  | NA                          |
| R01_cb3103_c1/flp0/2830      | R01_cb3103_c1/flp0/2830   | R01_cb3103_c1/flp0/2830      | NA                          | R01_cb3103_c1/flp0/2830     |
| R01_cb8564_c81887/flp0/3974  | NA                        | R01_cb8564_c81887/flp0/3974  | R01_cb8564_c81887/flp0/3974 | R01_cb8564_c81887/flp0/3974 |
| R01_cb6812_c0/f3p0/377       | R01_cb6812_c0/f3p0/377    | R01_cb6812_c0/f3p0/377       | NA                          | R01_cb6812_c0/f3p0/377      |
| R01_cb11763_c1/flp0/3148     | NA                        | NA                           | NA                          | R01_cb11763_c1/flp0/3148    |
| R01_cb15861_c0/flp0/1249     | NA                        | NA                           | NA                          | R01_cb15861_c0/flp0/1249    |
| R01_cb8564_c942/f2p0/4968    | R01_cb8564_c942/f2p0/4968 | R01_cb8564_c942/f2p0/4968    | NA                          | NA                          |
| R01_cb2022_c14/flp0/2422     | NA                        | NA                           | NA                          | R01_cb2022_c14/flp0/2422    |
| R01_cb8564_c125480/flp1/2540 | NA                        | R01_cb8564_c125480/flp1/2540 | NA                          | NA                          |
| R01_cb8564_c82735/flp0/2122  | NA                        | NA                           | R01_cb8564_c82735/flp0/2122 | R01_cb8564_c82735/flp0/2122 |
| R01_cb822_c17/flp0/2461      | NA                        | R01_cb822_c17/flp0/2461      | NA                          | R01_cb822_c17/flp0/2461     |
| R01_cb2701_c3/flp0/3424      | NA                        | R01_cb2701_c3/flp0/3424      | NA                          | R01_cb2701_c3/flp0/3424     |

|                              |                             |                             |                             |                              |
|------------------------------|-----------------------------|-----------------------------|-----------------------------|------------------------------|
| R01_cb4185_c4/flp0/3018      | NA                          | NA                          | NA                          | R01_cb4185_c4/flp0/3018      |
| R01_cb12722_c14/flp0/1554    | NA                          | NA                          | NA                          | R01_cb12722_c14/flp0/1554    |
| R01_cb8564_c119976/flp0/1951 | NA                          | NA                          | NA                          | R01_cb8564_c119976/flp0/1951 |
| R01_cb8173_c5/flp3/2267      | NA                          | R01_cb8173_c5/flp3/2267     | R01_cb8173_c5/flp3/2267     | NA                           |
| R01_cb17033_c2/flp0/1107     | NA                          | NA                          | NA                          | R01_cb17033_c2/flp0/1107     |
| R01_cb18456_c3688/flp0/1243  | NA                          | R01_cb18456_c3688/flp0/1243 | NA                          | NA                           |
| R01_cb8564_c82480/flp0/2150  | R01_cb8564_c82480/flp0/2150 | R01_cb8564_c82480/flp0/2150 | R01_cb8564_c82480/flp0/2150 | NA                           |
| R01_cb10978_c2/flp0/1299     | NA                          | R01_cb10978_c2/flp0/1299    | NA                          | NA                           |
| R01_cb8187_c0/flp0/2429      | R01_cb8187_c0/flp0/2429     | R01_cb8187_c0/flp0/2429     | R01_cb8187_c0/flp0/2429     | R01_cb8187_c0/flp0/2429      |
| R01_cb4147_c21/flp0/2272     | NA                          | NA                          | NA                          | R01_cb4147_c21/flp0/2272     |
| R01_cb8564_c79900/flp0/4511  | R01_cb8564_c79900/flp0/4511 | R01_cb8564_c79900/flp0/4511 | R01_cb8564_c79900/flp0/4511 | R01_cb8564_c79900/flp0/4511  |
| R01_cb8564_c77385/flp0/2220  | NA                          | R01_cb8564_c77385/flp0/2220 | NA                          | NA                           |
| R01_cb1228_c14/flp0/2404     | NA                          | NA                          | NA                          | R01_cb1228_c14/flp0/2404     |
| R01_cb13016_c6/flp0/334      | R01_cb13016_c6/flp0/334     | R01_cb13016_c6/flp0/334     | R01_cb13016_c6/flp0/334     | R01_cb13016_c6/flp0/334      |
| R01_cb8564_c127124/flp0/1926 | NA                          | NA                          | NA                          | R01_cb8564_c127124/flp0/1926 |
| R01_cb8102_c8/flp3/1987      | NA                          | NA                          | NA                          | R01_cb8102_c8/flp3/1987      |
| R01_cb2298_c6/flp1/2290      | NA                          | NA                          | NA                          | R01_cb2298_c6/flp1/2290      |
| R01_cb17452_c5/flp1/877      | NA                          | R01_cb17452_c5/flp1/877     | NA                          | NA                           |
| R01_cb8564_c148897/f2p2/3139 | NA                          | NA                          | NA                          | R01_cb8564_c148897/f2p2/3139 |
| R01_cb10711_c1/flp0/2530     | NA                          | R01_cb10711_c1/flp0/2530    | NA                          | NA                           |
| R01_cb18456_c7547/flp1/980   | R01_cb18456_c7547/flp1/980  | R01_cb18456_c7547/flp1/980  | R01_cb18456_c7547/flp1/980  | R01_cb18456_c7547/flp1/980   |

|                              |                          |                            |                          |                              |
|------------------------------|--------------------------|----------------------------|--------------------------|------------------------------|
| R01_cb10453_c4/flp0/1053     | NA                       | NA                         | R01_cb10453_c4/flp0/1053 | R01_cb10453_c4/flp0/1053     |
| R01_cb8564_c114031/flp0/3559 | NA                       | NA                         | NA                       | R01_cb8564_c114031/flp0/3559 |
| R01_cb17442_c2/flp1/1710     | NA                       | NA                         | NA                       | R01_cb17442_c2/flp1/1710     |
| R01_cb10448_c2/flp0/3242     | NA                       | R01_cb10448_c2/flp0/3242   | NA                       | NA                           |
| R01_cb8564_c18740/flp0/3877  | NA                       | NA                         | NA                       | R01_cb8564_c18740/flp0/3877  |
| R01_cb10909_c6/flp0/1784     | NA                       | NA                         | NA                       | R01_cb10909_c6/flp0/1784     |
| R01_cb14212_c0/f2p0/972      | NA                       | R01_cb14212_c0/f2p0/972    | R01_cb14212_c0/f2p0/972  | R01_cb14212_c0/f2p0/972      |
| R01_cb6631_c31/flp0/1246     | NA                       | NA                         | NA                       | R01_cb6631_c31/flp0/1246     |
| R01_cb18223_c12/flp0/807     | R01_cb18223_c12/flp0/807 | R01_cb18223_c12/flp0/807   | NA                       | NA                           |
| R01_cb8564_c3058/flp0/4227   | NA                       | R01_cb8564_c3058/flp0/4227 | NA                       | R01_cb8564_c3058/flp0/4227   |
| R01_cb8564_c79525/flp0/2829  | NA                       | NA                         | NA                       | R01_cb8564_c79525/flp0/2829  |
| R01_cb1178_c11/flp0/2043     | NA                       | NA                         | NA                       | R01_cb1178_c11/flp0/2043     |
| R01_cb1398_c5/flp0/3236      | NA                       | R01_cb1398_c5/flp0/3236    | R01_cb1398_c5/flp0/3236  | NA                           |
| R01_cb12451_c2/flp0/1013     | NA                       | R01_cb12451_c2/flp0/1013   | NA                       | NA                           |
| R01_cb8564_c112683/flp0/2927 | NA                       | NA                         | NA                       | R01_cb8564_c112683/flp0/2927 |
| R01_cb13914_c11/flp0/714     | NA                       | NA                         | NA                       | R01_cb13914_c11/flp0/714     |
| R01_cb1900_c6/flp1/2700      | NA                       | NA                         | NA                       | R01_cb1900_c6/flp1/2700      |
| R01_cb8564_c83468/flp0/3918  | NA                       | NA                         | NA                       | R01_cb8564_c83468/flp0/3918  |
| R01_cb18409_c74/flp0/978     | NA                       | R01_cb18409_c74/flp0/978   | R01_cb18409_c74/flp0/978 | R01_cb18409_c74/flp0/978     |
| R01_cb7957_c1/flp0/2607      | NA                       | R01_cb7957_c1/flp0/2607    | R01_cb7957_c1/flp0/2607  | NA                           |
| R01_cb17079_c1/flp0/474      | R01_cb17079_c1/flp0/474  | NA                         | R01_cb17079_c1/flp0/474  | R01_cb17079_c1/flp0/474      |
| R01_cb6869_c15/flp0/538      | NA                       | R01_cb6869_c15/flp0/538    | NA                       | NA                           |
| R01_cb11442_c0/flp1/738      | R01_cb11442_c0/flp1/738  | R01_cb11442_c0/flp1/738    | R01_cb11442_c0/flp1/738  | R01_cb11442_c0/flp1/738      |
| R01_cb1264_c3/flp0/4126      | NA                       | NA                         | NA                       | R01_cb1264_c3/flp0/4126      |

|                             |                            |                             |                             |                             |
|-----------------------------|----------------------------|-----------------------------|-----------------------------|-----------------------------|
| R01_cb15035_c5/f1p0/694     | NA                         | R01_cb15035_c5/f1p0/694     | R01_cb15035_c5/f1p0/694     | R01_cb15035_c5/f1p0/694     |
| R01_cb5513_c2/f1p0/3090     | NA                         | NA                          | NA                          | R01_cb5513_c2/f1p0/3090     |
| R01_cb9799_c0/f1p0/1973     | NA                         | R01_cb9799_c0/f1p0/1973     | R01_cb9799_c0/f1p0/1973     | NA                          |
| R01_cb10420_c10/f3p0/1786   | NA                         | NA                          | NA                          | R01_cb10420_c10/f3p0/1786   |
| R01_cb10427_c4/f1p0/2507    | NA                         | NA                          | NA                          | R01_cb10427_c4/f1p0/2507    |
| R01_cb10015_c604/f2p0/590   | NA                         | R01_cb10015_c604/f2p0/590   | NA                          | NA                          |
| R01_cb18456_c7307/f1p0/554  | NA                         | R01_cb18456_c7307/f1p0/554  | NA                          | R01_cb18456_c7307/f1p0/554  |
| R01_cb13025_c15/f1p0/1471   | NA                         | NA                          | NA                          | R01_cb13025_c15/f1p0/1471   |
| R01_cb17570_c1/f1p0/726     | R01_cb17570_c1/f1p0/726    | NA                          | NA                          | NA                          |
| R01_cb8564_c71952/f1p1/1942 | NA                         | R01_cb8564_c71952/f1p1/1942 | R01_cb8564_c71952/f1p1/1942 | R01_cb8564_c71952/f1p1/1942 |
| R01_cb18760_c3/f1p0/6396    | NA                         | R01_cb18760_c3/f1p0/6396    | R01_cb18760_c3/f1p0/6396    | NA                          |
| R01_cb8564_c47840/f1p0/2036 | NA                         | NA                          | NA                          | R01_cb8564_c47840/f1p0/2036 |
| R01_cb10266_c4/f1p0/2826    | NA                         | R01_cb10266_c4/f1p0/2826    | NA                          | NA                          |
| R01_cb796_c9/f1p0/2562      | NA                         | R01_cb796_c9/f1p0/2562      | NA                          | NA                          |
| R01_cb15994_c2/f1p0/463     | NA                         | R01_cb15994_c2/f1p0/463     | NA                          | NA                          |
| R01_cb6163_c4/f2p0/1141     | NA                         | R01_cb6163_c4/f2p0/1141     | NA                          | NA                          |
| R01_cb3872_c3/f1p1/575      | NA                         | R01_cb3872_c3/f1p1/575      | NA                          | R01_cb3872_c3/f1p1/575      |
| R01_cb787_c2/f1p0/1571      | R01_cb787_c2/f1p0/1571     | R01_cb787_c2/f1p0/1571      | NA                          | NA                          |
| R01_cb8564_c3923/f1p0/3032  | R01_cb8564_c3923/f1p0/3032 | R01_cb8564_c3923/f1p0/3032  | R01_cb8564_c3923/f1p0/3032  | R01_cb8564_c3923/f1p0/3032  |
| R01_cb11476_c0/f1p0/1726    | NA                         | R01_cb11476_c0/f1p0/1726    | R01_cb11476_c0/f1p0/1726    | R01_cb11476_c0/f1p0/1726    |
| R01_cb14715_c3/f1p0/446     | NA                         | R01_cb14715_c3/f1p0/446     | R01_cb14715_c3/f1p0/446     | R01_cb14715_c3/f1p0/446     |
| R01_cb15443_c0/f2p0/1143    | NA                         | NA                          | NA                          | R01_cb15443_c0/f2p0/1143    |
| R01_cb1721_c1/f1p0/4139     | NA                         | R01_cb1721_c1/f1p0/4139     | R01_cb1721_c1/f1p0/4139     | NA                          |
| R01_cb7533_c4/f1p0/2219     | NA                         | NA                          | NA                          | R01_cb7533_c4/f1p0/2219     |
| R01_cb7116_c7/f1p0/1884     | NA                         | R01_cb7116_c7/f1p0/1884     | NA                          | NA                          |
| R01_cb8799_c1/f1p0/2237     | NA                         | NA                          | NA                          | R01_cb8799_c1/f1p0/2237     |

|                              |                           |                             |                           |                              |
|------------------------------|---------------------------|-----------------------------|---------------------------|------------------------------|
| R01_cb18787_c1/flp0/5167     | R01_cb18787_c1/flp0/5167  | R01_cb18787_c1/flp0/5167    | R01_cb18787_c1/flp0/5167  | R01_cb18787_c1/flp0/5167     |
| R01_cb12882_c0/flp0/1844     | NA                        | NA                          | NA                        | R01_cb12882_c0/flp0/1844     |
| R01_cb9114_c0/flp1/2181      | NA                        | R01_cb9114_c0/flp1/2181     | NA                        | NA                           |
| R01_cb8564_c109512/f3p0/1967 | NA                        | NA                          | NA                        | R01_cb8564_c109512/f3p0/1967 |
| R01_cb18175_c1/flp0/830      | NA                        | R01_cb18175_c1/flp0/830     | R01_cb18175_c1/flp0/830   | R01_cb18175_c1/flp0/830      |
| R01_cb4098_c50/flp0/3087     | NA                        | R01_cb4098_c50/flp0/3087    | NA                        | R01_cb4098_c50/flp0/3087     |
| R01_cb14002_c3/flp0/809      | NA                        | NA                          | NA                        | R01_cb14002_c3/flp0/809      |
| R01_cb11931_c9/flp0/367      | R01_cb11931_c9/flp0/367   | R01_cb11931_c9/flp0/367     | R01_cb11931_c9/flp0/367   | R01_cb11931_c9/flp0/367      |
| R01_cb13762_c29/flp0/1180    | NA                        | R01_cb13762_c29/flp0/1180   | R01_cb13762_c29/flp0/1180 | R01_cb13762_c29/flp0/1180    |
| R01_cb1333_c85/flp0/2873     | R01_cb1333_c85/flp0/2873  | R01_cb1333_c85/flp0/2873    | R01_cb1333_c85/flp0/2873  | R01_cb1333_c85/flp0/2873     |
| R01_cb3703_c8/flp0/1397      | NA                        | NA                          | NA                        | R01_cb3703_c8/flp0/1397      |
| R01_cb17935_c3/flp0/572      | R01_cb17935_c3/flp0/572   | R01_cb17935_c3/flp0/572     | NA                        | R01_cb17935_c3/flp0/572      |
| R01_cb13485_c6/f32p0/652     | NA                        | R01_cb13485_c6/f32p0/652    | NA                        | NA                           |
| R01_cb1078_c0/f3p0/3821      | NA                        | NA                          | NA                        | R01_cb1078_c0/f3p0/3821      |
| R01_cb13864_c0/f2p0/1342     | NA                        | R01_cb13864_c0/f2p0/1342    | NA                        | NA                           |
| R01_cb18456_c1908/flp0/688   | NA                        | R01_cb18456_c1908/flp0/688  | NA                        | NA                           |
| R01_cb14619_c6/flp0/679      | NA                        | R01_cb14619_c6/flp0/679     | R01_cb14619_c6/flp0/679   | R01_cb14619_c6/flp0/679      |
| R01_cb8564_c86567/f4p1/2966  | NA                        | R01_cb8564_c86567/f4p1/2966 | NA                        | NA                           |
| R01_cb2200_c0/f4p1/733       | NA                        | NA                          | NA                        | R01_cb2200_c0/f4p1/733       |
| R01_cb10029_c98/flp7/798     | NA                        | R01_cb10029_c98/flp7/798    | NA                        | NA                           |
| R01_cb13651_c27/flp0/1775    | R01_cb13651_c27/flp0/1775 | R01_cb13651_c27/flp0/1775   | R01_cb13651_c27/flp0/1775 | R01_cb13651_c27/flp0/1775    |
| R01_cb7398_c6/flp0/1846      | NA                        | NA                          | NA                        | R01_cb7398_c6/flp0/1846      |
| R01_cb15864_c2/flp0/1018     | NA                        | R01_cb15864_c2/flp0/1018    | R01_cb15864_c2/flp0/1018  | R01_cb15864_c2/flp0/1018     |
| R01_cb8785_c3/flp0/3260      | NA                        | NA                          | NA                        | R01_cb8785_c3/flp0/3260      |
| R01_cb15012_c0/flp0/972      | NA                        | R01_cb15012_c0/flp0/972     | NA                        | R01_cb15012_c0/flp0/972      |

|                             |                                  |                             |                            |                             |
|-----------------------------|----------------------------------|-----------------------------|----------------------------|-----------------------------|
| R01_cb8564_c87662/f4p1/3732 | R01_cb8564_c87662/f4p1/3732<br>2 | R01_cb8564_c87662/f4p1/3732 | NA                         | NA                          |
| R01_cb2033_c2/f2p0/3608     | NA                               | NA                          | NA                         | R01_cb2033_c2/f2p0/3608     |
| R01_cb10759_c1/f1p0/3008    | R01_cb10759_c1/f1p0/3008         | R01_cb10759_c1/f1p0/3008    | NA                         | R01_cb10759_c1/f1p0/3008    |
| R01_cb8564_c72622/f1p1/3614 | NA                               | NA                          | NA                         | R01_cb8564_c72622/f1p1/3614 |
| R01_cb8564_c3994/f2p0/3304  | NA                               | NA                          | R01_cb8564_c3994/f2p0/3304 | R01_cb8564_c3994/f2p0/3304  |
| R01_cb8564_c16587/f4p0/3516 | NA                               | NA                          | NA                         | R01_cb8564_c16587/f4p0/3516 |
| R01_cb10207_c1/f5p0/743     | NA                               | R01_cb10207_c1/f5p0/743     | NA                         | NA                          |
| R01_cb18456_c5748/f1p0/495  | NA                               | NA                          | NA                         | R01_cb18456_c5748/f1p0/495  |
| R01_cb11120_c2/f1p1/2560    | NA                               | NA                          | R01_cb11120_c2/f1p1/2560   | R01_cb11120_c2/f1p1/2560    |
| R01_cb18839_c0/f1p0/5272    | NA                               | R01_cb18839_c0/f1p0/5272    | NA                         | NA                          |
| R01_cb6608_c14/f1p0/2469    | NA                               | NA                          | NA                         | R01_cb6608_c14/f1p0/2469    |
| R01_cb2219_c7/f1p0/2387     | NA                               | NA                          | NA                         | R01_cb2219_c7/f1p0/2387     |
| R01_cb8564_c46913/f1p0/2191 | NA                               | R01_cb8564_c46913/f1p0/2191 | NA                         | NA                          |
| R01_cb5159_c5/f1p0/3169     | NA                               | R01_cb5159_c5/f1p0/3169     | NA                         | NA                          |
| R01_cb3997_c0/f2p0/1326     | NA                               | NA                          | NA                         | R01_cb3997_c0/f2p0/1326     |
| R01_cb10924_c3/f1p0/397     | R01_cb10924_c3/f1p0/397          | R01_cb10924_c3/f1p0/397     | NA                         | NA                          |
| R01_cb8286_c10/f1p0/2326    | NA                               | NA                          | NA                         | R01_cb8286_c10/f1p0/2326    |
| R01_cb9847_c5/f1p0/1686     | NA                               | R01_cb9847_c5/f1p0/1686     | NA                         | NA                          |
| R01_cb8564_c5267/f1p0/3264  | NA                               | R01_cb8564_c5267/f1p0/3264  | NA                         | NA                          |
| R01_cb8085_c35/f1p0/337     | R01_cb8085_c35/f1p0/337          | R01_cb8085_c35/f1p0/337     | R01_cb8085_c35/f1p0/337    | R01_cb8085_c35/f1p0/337     |
| R01_cb225_c2/f1p0/4622      | NA                               | NA                          | NA                         | R01_cb225_c2/f1p0/4622      |
| R01_cb8728_c3/f1p0/2811     | NA                               | R01_cb8728_c3/f1p0/2811     | NA                         | NA                          |
| R01_cb18456_c5443/f1p0/608  | R01_cb18456_c5443/f1p0/608       | R01_cb18456_c5443/f1p0/608  | R01_cb18456_c5443/f1p0/608 | R01_cb18456_c5443/f1p0/608  |
| R01_cb15807_c0/f5p0/677     | NA                               | NA                          | NA                         | R01_cb15807_c0/f5p0/677     |
| R01_cb11235_c0/f1p0/1879    | NA                               | R01_cb11235_c0/f1p0/1879    | NA                         | NA                          |

|                              |                            |                              |                             |                              |
|------------------------------|----------------------------|------------------------------|-----------------------------|------------------------------|
| R01_cb14373_c4/flp0/856      | NA                         | R01_cb14373_c4/flp0/856      | R01_cb14373_c4/flp0/856     | R01_cb14373_c4/flp0/856      |
| R01_cb8564_c23163/flp0/4734  | NA                         | R01_cb8564_c23163/flp0/4734  | R01_cb8564_c23163/flp0/4734 | NA                           |
| R01_cb8564_c115077/flp0/2820 | NA                         | NA                           | NA                          | R01_cb8564_c115077/flp0/2820 |
| R01_cb5378_c4/flp0/331       | NA                         | R01_cb5378_c4/flp0/331       | R01_cb5378_c4/flp0/331      | R01_cb5378_c4/flp0/331       |
| R01_cb8564_c17709/flp0/3279  | NA                         | R01_cb8564_c17709/flp0/3279  | R01_cb8564_c17709/flp0/3279 | R01_cb8564_c17709/flp0/3279  |
| R01_cb13583_c0/f6p0/1507     | NA                         | NA                           | NA                          | R01_cb13583_c0/f6p0/1507     |
| R01_cb13297_c2/flp0/958      | NA                         | R01_cb13297_c2/flp0/958      | NA                          | R01_cb13297_c2/flp0/958      |
| R01_cb17358_c5/flp0/1420     | NA                         | NA                           | NA                          | R01_cb17358_c5/flp0/1420     |
| R01_cb10970_c5/flp0/1213     | NA                         | NA                           | NA                          | R01_cb10970_c5/flp0/1213     |
| R01_cb2993_c4/flp0/2345      | NA                         | R01_cb2993_c4/flp0/2345      | NA                          | NA                           |
| R01_cb17265_c1/flp0/1088     | R01_cb17265_c1/flp0/1088   | R01_cb17265_c1/flp0/1088     | R01_cb17265_c1/flp0/1088    | R01_cb17265_c1/flp0/1088     |
| R01_cb15218_c0/flp0/1341     | NA                         | R01_cb15218_c0/flp0/1341     | R01_cb15218_c0/flp0/1341    | R01_cb15218_c0/flp0/1341     |
| R01_cb13990_c2/flp0/759      | R01_cb13990_c2/flp0/759    | NA                           | NA                          | R01_cb13990_c2/flp0/759      |
| R01_cb15811_c21/flp0/847     | R01_cb15811_c21/flp0/847   | R01_cb15811_c21/flp0/847     | R01_cb15811_c21/flp0/847    | R01_cb15811_c21/flp0/847     |
| R01_cb4345_c5/flp1/3251      | NA                         | NA                           | NA                          | R01_cb4345_c5/flp1/3251      |
| R01_cb16532_c1/flp0/645      | NA                         | R01_cb16532_c1/flp0/645      | NA                          | NA                           |
| R01_cb18456_c5456/flp0/877   | R01_cb18456_c5456/flp0/877 | R01_cb18456_c5456/flp0/877   | NA                          | R01_cb18456_c5456/flp0/877   |
| R01_cb8564_c125291/flp0/3569 | NA                         | R01_cb8564_c125291/flp0/3569 | NA                          | NA                           |
| R01_cb8191_c3/flp0/2058      | NA                         | R01_cb8191_c3/flp0/2058      | NA                          | NA                           |
| R01_cb8564_c13852/flp0/2417  | NA                         | R01_cb8564_c13852/flp0/2417  | NA                          | R01_cb8564_c13852/flp0/2417  |
| R01_cb16293_c5/flp0/875      | NA                         | NA                           | R01_cb16293_c5/flp0/875     | R01_cb16293_c5/flp0/875      |
| R01_cb15200_c2/f2p0/1439     | R01_cb15200_c2/f2p0/1439   | NA                           | NA                          | NA                           |
| R01_cb3555_c3/flp0/2050      | NA                         | NA                           | NA                          | R01_cb3555_c3/flp0/2050      |
| R01_cb3294_c0/flp0/3666      | NA                         | NA                           | NA                          | R01_cb3294_c0/flp0/3666      |



|                             |                             |                             |                             |                             |
|-----------------------------|-----------------------------|-----------------------------|-----------------------------|-----------------------------|
| R01_cb8564_c82703/flp0/3089 | NA                          | R01_cb8564_c82703/flp0/3089 | NA                          | NA                          |
| R01_cb13438_c4/flp0/791     | NA                          | NA                          | NA                          | R01_cb13438_c4/flp0/791     |
| R01_cb15855_c2/flp0/1261    | NA                          | NA                          | NA                          | R01_cb15855_c2/flp0/1261    |
| R01_cb8564_c41692/flp3/2987 | NA                          | R01_cb8564_c41692/flp3/2987 | NA                          | NA                          |
| R01_cb5139_c12/flp0/3085    | NA                          | NA                          | NA                          | R01_cb5139_c12/flp0/3085    |
| R01_cb8809_c8/flp1/2899     | NA                          | NA                          | NA                          | R01_cb8809_c8/flp1/2899     |
| R01_cb16645_c22/flp0/384    | R01_cb16645_c22/flp0/384    | R01_cb16645_c22/flp0/384    | R01_cb16645_c22/flp0/384    | R01_cb16645_c22/flp0/384    |
| R01_cb18132_c11/flp0/1793   | NA                          | R01_cb18132_c11/flp0/1793   | NA                          | NA                          |
| R01_cb8564_c23203/flp1/3864 | NA                          | NA                          | NA                          | R01_cb8564_c23203/flp1/3864 |
| R01_cb8564_c50736/flp0/2717 | R01_cb8564_c50736/flp0/2717 | R01_cb8564_c50736/flp0/2717 | R01_cb8564_c50736/flp0/2717 | R01_cb8564_c50736/flp0/2717 |
| R01_cb10948_c4/flp0/1242    | R01_cb10948_c4/flp0/1242    | R01_cb10948_c4/flp0/1242    | R01_cb10948_c4/flp0/1242    | R01_cb10948_c4/flp0/1242    |
| R01_cb8564_c91272/flp0/1917 | NA                          | R01_cb8564_c91272/flp0/1917 | NA                          | NA                          |
| R01_cb2512_c4/flp0/2433     | NA                          | NA                          | NA                          | R01_cb2512_c4/flp0/2433     |
| R01_cb8564_c3001/flp0/2451  | NA                          | NA                          | NA                          | R01_cb8564_c3001/flp0/2451  |
| R01_cb18456_c7202/flp0/621  | NA                          | R01_cb18456_c7202/flp0/621  | R01_cb18456_c7202/flp0/621  | R01_cb18456_c7202/flp0/621  |
| R01_cb7942_c11/flp1/4993    | NA                          | R01_cb7942_c11/flp1/4993    | NA                          | NA                          |
| R01_cb6851_c1/flp0/4156     | NA                          | R01_cb6851_c1/flp0/4156     | NA                          | NA                          |
| R01_cb7611_c7/flp0/2543     | NA                          | NA                          | NA                          | R01_cb7611_c7/flp0/2543     |
| R01_cb2993_c0/flp0/3751     | NA                          | R01_cb2993_c0/flp0/3751     | R01_cb2993_c0/flp0/3751     | NA                          |
| R01_cb8564_c77129/flp0/2424 | NA                          | NA                          | NA                          | R01_cb8564_c77129/flp0/2424 |
| R01_cb11717_c1/flp0/3372    | NA                          | R01_cb11717_c1/flp0/3372    | R01_cb11717_c1/flp0/3372    | R01_cb11717_c1/flp0/3372    |
| R01_cb8564_c87987/flp0/2617 | NA                          | NA                          | NA                          | R01_cb8564_c87987/flp0/2617 |
| R01_cb16146_c4/flp0/310     | R01_cb16146_c4/flp0/310     | R01_cb16146_c4/flp0/310     | R01_cb16146_c4/flp0/310     | R01_cb16146_c4/flp0/310     |
| R01_cb2576_c12/flp0/2804    | R01_cb2576_c12/flp0/2804    | R01_cb2576_c12/flp0/2804    | R01_cb2576_c12/flp0/2804    | R01_cb2576_c12/flp0/2804    |
| R01_cb18409_c15/f3p0/572    | R01_cb18409_c15/f3p0/572    | R01_cb18409_c15/f3p0/572    | R01_cb18409_c15/f3p0/572    | R01_cb18409_c15/f3p0/572    |

|                              |                          |                              |                          |                              |
|------------------------------|--------------------------|------------------------------|--------------------------|------------------------------|
| R01_cb12165_c24/flp1/637     | R01_cb12165_c24/flp1/637 | R01_cb12165_c24/flp1/637     | NA                       | NA                           |
| R01_cb8564_c112971/flp0/2064 | NA                       | R01_cb8564_c112971/flp0/2064 | NA                       | NA                           |
| R01_cb123_c5/flp0/3222       | NA                       | NA                           | NA                       | R01_cb123_c5/flp0/3222       |
| R01_cb8564_c80293/f2p0/2883  | NA                       | NA                           | NA                       | R01_cb8564_c80293/f2p0/2883  |
| R01_cb7362_c11/flp0/2393     | R01_cb7362_c11/flp0/2393 | R01_cb7362_c11/flp0/2393     | R01_cb7362_c11/flp0/2393 | NA                           |
| R01_cb8564_c92253/flp0/2117  | NA                       | R01_cb8564_c92253/flp0/2117  | NA                       | NA                           |
| R01_cb13884_c3/f3p0/581      | R01_cb13884_c3/f3p0/581  | NA                           | R01_cb13884_c3/f3p0/581  | R01_cb13884_c3/f3p0/581      |
| R01_cb8219_c24/flp0/2245     | NA                       | R01_cb8219_c24/flp0/2245     | NA                       | NA                           |
| R01_cb4295_c11/flp0/3015     | R01_cb4295_c11/flp0/3015 | R01_cb4295_c11/flp0/3015     | NA                       | NA                           |
| R01_cb2225_c7/flp0/2823      | NA                       | R01_cb2225_c7/flp0/2823      | NA                       | NA                           |
| R01_cb15334_c4/flp0/1859     | R01_cb15334_c4/flp0/1859 | R01_cb15334_c4/flp0/1859     | R01_cb15334_c4/flp0/1859 | R01_cb15334_c4/flp0/1859     |
| R01_cb8564_c4477/flp0/3457   | NA                       | NA                           | NA                       | R01_cb8564_c4477/flp0/3457   |
| R01_cb499_c50/flp0/2769      | NA                       | R01_cb499_c50/flp0/2769      | NA                       | NA                           |
| R01_cb1554_c5/flp0/3937      | NA                       | NA                           | NA                       | R01_cb1554_c5/flp0/3937      |
| R01_cb3026_c3/flp0/3742      | NA                       | R01_cb3026_c3/flp0/3742      | NA                       | NA                           |
| R01_cb4768_c16/flp0/1948     | NA                       | R01_cb4768_c16/flp0/1948     | NA                       | NA                           |
| R01_cb8564_c21316/flp2/2982  | NA                       | NA                           | NA                       | R01_cb8564_c21316/flp2/2982  |
| R01_cb4059_c2/flp0/3449      | NA                       | NA                           | NA                       | R01_cb4059_c2/flp0/3449      |
| R01_cb8564_c121298/flp0/2247 | NA                       | NA                           | NA                       | R01_cb8564_c121298/flp0/2247 |
| R01_cb9507_c2/flp0/2136      | NA                       | R01_cb9507_c2/flp0/2136      | NA                       | NA                           |
| R01_cb917_c5/flp0/4567       | NA                       | NA                           | NA                       | R01_cb917_c5/flp0/4567       |
| R01_cb11924_c12/flp1/438     | R01_cb11924_c12/flp1/438 | R01_cb11924_c12/flp1/438     | R01_cb11924_c12/flp1/438 | NA                           |
| R01_cb16645_c15/flp0/1413    | NA                       | R01_cb16645_c15/flp0/1413    | NA                       | R01_cb16645_c15/flp0/1413    |
| R01_cb8564_c41324/flp0/3027  | NA                       | NA                           | NA                       | R01_cb8564_c41324/flp0/3027  |

|                                  |                                  |                                  |                             |                                  |
|----------------------------------|----------------------------------|----------------------------------|-----------------------------|----------------------------------|
| R01_cb8564_c113357/flp0/263<br>7 | NA                               | NA                               | NA                          | R01_cb8564_c113357/flp0/263<br>7 |
| R01_cb17973_c59/flp0/1683        | NA                               | NA                               | R01_cb17973_c59/flp0/1683   | NA                               |
| R01_cb8564_c73974/flp1/2661      | R01_cb8564_c73974/flp1/2661<br>1 | R01_cb8564_c73974/flp1/2661      | R01_cb8564_c73974/flp1/2661 | R01_cb8564_c73974/flp1/2661      |
| R01_cb5951_c4/flp0/2340          | NA                               | R01_cb5951_c4/flp0/2340          | NA                          | NA                               |
| R01_cb1333_c21/f2p0/2545         | R01_cb1333_c21/f2p0/2545         | R01_cb1333_c21/f2p0/2545         | R01_cb1333_c21/f2p0/2545    | R01_cb1333_c21/f2p0/2545         |
| R01_cb8881_c19/flp0/1619         | NA                               | NA                               | NA                          | R01_cb8881_c19/flp0/1619         |
| R01_cb2895_c0/flp0/3773          | NA                               | R01_cb2895_c0/flp0/3773          | NA                          | NA                               |
| R01_cb15179_c1/flp1/1415         | NA                               | NA                               | NA                          | R01_cb15179_c1/flp1/1415         |
| R01_cb8564_c86410/flp0/3195      | NA                               | NA                               | R01_cb8564_c86410/flp0/3195 | R01_cb8564_c86410/flp0/3195      |
| R01_cb4009_c3/flp0/3411          | NA                               | R01_cb4009_c3/flp0/3411          | NA                          | NA                               |
| R01_cb1488_c7/flp0/1425          | NA                               | NA                               | NA                          | R01_cb1488_c7/flp0/1425          |
| R01_cb8564_c17884/flp0/2817      | NA                               | R01_cb8564_c17884/flp0/2817      | R01_cb8564_c17884/flp0/2817 | R01_cb8564_c17884/flp0/2817      |
| R01_cb8239_c1/flp0/2422          | NA                               | NA                               | NA                          | R01_cb8239_c1/flp0/2422          |
| R01_cb11608_c1/flp0/2932         | NA                               | R01_cb11608_c1/flp0/2932         | R01_cb11608_c1/flp0/2932    | R01_cb11608_c1/flp0/2932         |
| R01_cb2018_c1/flp0/3340          | NA                               | NA                               | NA                          | R01_cb2018_c1/flp0/3340          |
| R01_cb8564_c10791/flp0/3599      | NA                               | R01_cb8564_c10791/flp0/3599      | R01_cb8564_c10791/flp0/3599 | R01_cb8564_c10791/flp0/3599      |
| R01_cb18492_c1/flp0/1349         | NA                               | NA                               | NA                          | R01_cb18492_c1/flp0/1349         |
| R01_cb123_c0/f2p0/4981           | NA                               | NA                               | NA                          | R01_cb123_c0/f2p0/4981           |
| R01_cb8564_c111929/flp0/225<br>4 | NA                               | R01_cb8564_c111929/flp0/225<br>4 | NA                          | NA                               |
| R01_cb8014_c3/flp0/4117          | NA                               | R01_cb8014_c3/flp0/4117          | NA                          | NA                               |
| R01_cb2779_c3/flp1/3765          | NA                               | R01_cb2779_c3/flp1/3765          | NA                          | R01_cb2779_c3/flp1/3765          |
| R01_cb2206_c8/flp1/1928          | R01_cb2206_c8/flp1/1928          | R01_cb2206_c8/flp1/1928          | NA                          | NA                               |
| R01_cb8564_c47240/flp0/2783      | NA                               | R01_cb8564_c47240/flp0/2783      | NA                          | NA                               |

|                                  |                          |                                  |                                  |                                  |
|----------------------------------|--------------------------|----------------------------------|----------------------------------|----------------------------------|
| R01_cb5728_c3/flp0/3034          | NA                       | R01_cb5728_c3/flp0/3034          | NA                               | NA                               |
| R01_cb18261_c1/flp0/771          | R01_cb18261_c1/flp0/771  | NA                               | NA                               | NA                               |
| R01_cb2378_c39/f37p0/3339        | NA                       | NA                               | NA                               | R01_cb2378_c39/f37p0/3339        |
| R01_cb11520_c1/flp0/1918         | NA                       | R01_cb11520_c1/flp0/1918         | NA                               | NA                               |
| R01_cb5304_c4/flp0/3674          | NA                       | NA                               | NA                               | R01_cb5304_c4/flp0/3674          |
| R01_cb11065_c1/flp0/2267         | NA                       | NA                               | NA                               | R01_cb11065_c1/flp0/2267         |
| R01_cb5512_c16/flp0/2552         | NA                       | NA                               | R01_cb5512_c16/flp0/2552         | NA                               |
| R01_cb8252_c6/flp0/2382          | NA                       | NA                               | NA                               | R01_cb8252_c6/flp0/2382          |
| R01_cb14353_c1/flp0/1613         | NA                       | R01_cb14353_c1/flp0/1613         | R01_cb14353_c1/flp0/1613         | R01_cb14353_c1/flp0/1613         |
| R01_cb18497_c0/flp0/1820         | R01_cb18497_c0/flp0/1820 | R01_cb18497_c0/flp0/1820         | R01_cb18497_c0/flp0/1820         | R01_cb18497_c0/flp0/1820         |
| R01_cb1905_c30/flp0/3060         | NA                       | R01_cb1905_c30/flp0/3060         | R01_cb1905_c30/flp0/3060         | R01_cb1905_c30/flp0/3060         |
| R01_cb7395_c4/flp0/2685          | NA                       | R01_cb7395_c4/flp0/2685          | NA                               | NA                               |
| R01_cb5778_c4/flp0/295           | R01_cb5778_c4/flp0/295   | R01_cb5778_c4/flp0/295           | R01_cb5778_c4/flp0/295           | R01_cb5778_c4/flp0/295           |
| R01_cb3270_c30/flp0/789          | R01_cb3270_c30/flp0/789  | R01_cb3270_c30/flp0/789          | NA                               | R01_cb3270_c30/flp0/789          |
| R01_cb11279_c3/flp0/2374         | NA                       | R01_cb11279_c3/flp0/2374         | NA                               | NA                               |
| R01_cb8564_c123127/flp1/245<br>1 | NA                       | R01_cb8564_c123127/flp1/245<br>1 | R01_cb8564_c123127/flp1/245<br>1 | R01_cb8564_c123127/flp1/245<br>1 |
| R01_cb1042_c4/flp0/2464          | NA                       | R01_cb1042_c4/flp0/2464          | NA                               | R01_cb1042_c4/flp0/2464          |
| R01_cb10480_c25/flp0/2414        | NA                       | R01_cb10480_c25/flp0/2414        | NA                               | NA                               |
| R01_cb10379_c1/flp0/2442         | R01_cb10379_c1/flp0/2442 | R01_cb10379_c1/flp0/2442         | NA                               | NA                               |
| R01_cb7519_c6/flp0/2438          | NA                       | NA                               | NA                               | R01_cb7519_c6/flp0/2438          |
| R01_cb16566_c0/flp0/737          | NA                       | R01_cb16566_c0/flp0/737          | R01_cb16566_c0/flp0/737          | R01_cb16566_c0/flp0/737          |
| R01_cb6008_c3/flp0/2598          | NA                       | NA                               | NA                               | R01_cb6008_c3/flp0/2598          |
| R01_cb8851_c4/f2p0/1421          | NA                       | NA                               | NA                               | R01_cb8851_c4/f2p0/1421          |
| R01_cb9682_c1/flp0/2011          | NA                       | NA                               | NA                               | R01_cb9682_c1/flp0/2011          |
| R01_cb6812_c6/flp1/2649          | NA                       | R01_cb6812_c6/flp1/2649          | NA                               | NA                               |

|                             |                             |                             |                          |                             |
|-----------------------------|-----------------------------|-----------------------------|--------------------------|-----------------------------|
| R01_cb8057_c0/flp0/2473     | R01_cb8057_c0/flp0/2473     | R01_cb8057_c0/flp0/2473     | R01_cb8057_c0/flp0/2473  | R01_cb8057_c0/flp0/2473     |
| R01_cb15154_c8/flp1/846     | NA                          | NA                          | NA                       | R01_cb15154_c8/flp1/846     |
| R01_cb16929_c1/flp0/716     | NA                          | R01_cb16929_c1/flp0/716     | NA                       | NA                          |
| R01_cb12577_c23/flp1/1018   | NA                          | NA                          | NA                       | R01_cb12577_c23/flp1/1018   |
| R01_cb5902_c0/flp0/2977     | NA                          | R01_cb5902_c0/flp0/2977     | NA                       | NA                          |
| R01_cb3550_c3/flp0/1739     | NA                          | NA                          | NA                       | R01_cb3550_c3/flp0/1739     |
| R01_cb18113_c1/flp0/991     | NA                          | NA                          | NA                       | R01_cb18113_c1/flp0/991     |
| R01_cb10751_c2/flp0/2547    | NA                          | R01_cb10751_c2/flp0/2547    | NA                       | NA                          |
| R01_cb18260_c1/flp0/1561    | NA                          | NA                          | NA                       | R01_cb18260_c1/flp0/1561    |
| R01_cb13530_c1/flp0/694     | NA                          | R01_cb13530_c1/flp0/694     | NA                       | NA                          |
| R01_cb6686_c3/flp0/2629     | NA                          | R01_cb6686_c3/flp0/2629     | R01_cb6686_c3/flp0/2629  | NA                          |
| R01_cb8564_c11169/flp0/3716 | R01_cb8564_c11169/flp0/3716 | R01_cb8564_c11169/flp0/3716 | NA                       | R01_cb8564_c11169/flp0/3716 |
| R01_cb18192_c6/flp0/1332    | NA                          | R01_cb18192_c6/flp0/1332    | R01_cb18192_c6/flp0/1332 | R01_cb18192_c6/flp0/1332    |
| R01_cb14174_c2/flp2/1445    | NA                          | NA                          | NA                       | R01_cb14174_c2/flp2/1445    |
| R01_cb3192_c11/flp0/3371    | NA                          | NA                          | NA                       | R01_cb3192_c11/flp0/3371    |
| R01_cb13821_c1/flp0/490     | NA                          | NA                          | R01_cb13821_c1/flp0/490  | R01_cb13821_c1/flp0/490     |
| R01_cb16443_c0/f4p0/528     | NA                          | R01_cb16443_c0/f4p0/528     | NA                       | NA                          |
| R01_cb18010_c1/flp0/791     | NA                          | R01_cb18010_c1/flp0/791     | R01_cb18010_c1/flp0/791  | R01_cb18010_c1/flp0/791     |
| R01_cb4342_c1/f2p0/3323     | NA                          | R01_cb4342_c1/f2p0/3323     | NA                       | NA                          |
| R01_cb10635_c0/flp0/1625    | R01_cb10635_c0/flp0/1625    | R01_cb10635_c0/flp0/1625    | NA                       | NA                          |
| R01_cb18531_c1/flp0/705     | NA                          | NA                          | NA                       | R01_cb18531_c1/flp0/705     |
| R01_cb16747_c5/flp0/1473    | NA                          | NA                          | NA                       | R01_cb16747_c5/flp0/1473    |
| R01_cb9236_c2/flp0/1808     | NA                          | NA                          | NA                       | R01_cb9236_c2/flp0/1808     |
| R01_cb9922_c1/flp0/2012     | NA                          | NA                          | NA                       | R01_cb9922_c1/flp0/2012     |
| R01_cb5498_c3/flp0/2270     | R01_cb5498_c3/flp0/2270     | R01_cb5498_c3/flp0/2270     | R01_cb5498_c3/flp0/2270  | R01_cb5498_c3/flp0/2270     |

|                                  |                           |                             |                             |                                  |
|----------------------------------|---------------------------|-----------------------------|-----------------------------|----------------------------------|
| R01_cb17284_c0/flp0/736          | NA                        | NA                          | NA                          | R01_cb17284_c0/flp0/736          |
| R01_cb10217_c4/flp1/1685         | NA                        | NA                          | NA                          | R01_cb10217_c4/flp1/1685         |
| R01_cb124_c54/flp0/3344          | NA                        | NA                          | NA                          | R01_cb124_c54/flp0/3344          |
| R01_cb10769_c2/flp0/4601         | NA                        | R01_cb10769_c2/flp0/4601    | NA                          | R01_cb10769_c2/flp0/4601         |
| R01_cb16981_c5/flp0/820          | NA                        | NA                          | NA                          | R01_cb16981_c5/flp0/820          |
| R01_cb14704_c24/flp0/1363        | NA                        | R01_cb14704_c24/flp0/1363   | NA                          | NA                               |
| R01_cb8564_c88368/flp0/2538      | NA                        | R01_cb8564_c88368/flp0/2538 | R01_cb8564_c88368/flp0/2538 | R01_cb8564_c88368/flp0/2538      |
| R01_cb12677_c3/flp0/932          | NA                        | NA                          | NA                          | R01_cb12677_c3/flp0/932          |
| R01_cb8564_c86739/flp0/3142      | NA                        | NA                          | NA                          | R01_cb8564_c86739/flp0/3142      |
| R01_cb4604_c20/flp0/3971         | NA                        | R01_cb4604_c20/flp0/3971    | R01_cb4604_c20/flp0/3971    | R01_cb4604_c20/flp0/3971         |
| R01_cb3862_c64/flp0/349          | R01_cb3862_c64/flp0/349   | R01_cb3862_c64/flp0/349     | R01_cb3862_c64/flp0/349     | R01_cb3862_c64/flp0/349          |
| R01_cb12972_c22/flp0/1490        | R01_cb12972_c22/flp0/1490 | R01_cb12972_c22/flp0/1490   | R01_cb12972_c22/flp0/1490   | R01_cb12972_c22/flp0/1490        |
| R01_cb17861_c2/flp0/1492         | NA                        | NA                          | NA                          | R01_cb17861_c2/flp0/1492         |
| R01_cb4838_c2/flp0/2549          | NA                        | R01_cb4838_c2/flp0/2549     | NA                          | R01_cb4838_c2/flp0/2549          |
| R01_cb8564_c119767/flp0/189<br>2 | NA                        | NA                          | NA                          | R01_cb8564_c119767/flp0/189<br>2 |
| R01_cb9780_c3/flp0/2086          | NA                        | NA                          | NA                          | R01_cb9780_c3/flp0/2086          |
| R01_cb6570_c4/flp0/831           | R01_cb6570_c4/flp0/831    | R01_cb6570_c4/flp0/831      | NA                          | R01_cb6570_c4/flp0/831           |
| R01_cb8564_c16212/flp0/3078      | NA                        | R01_cb8564_c16212/flp0/3078 | NA                          | NA                               |
| R01_cb16752_c3/flp0/1348         | NA                        | NA                          | NA                          | R01_cb16752_c3/flp0/1348         |
| R01_cb8100_c18/flp0/416          | R01_cb8100_c18/flp0/416   | NA                          | R01_cb8100_c18/flp0/416     | R01_cb8100_c18/flp0/416          |
| R01_cb3341_c6/flp0/4031          | NA                        | NA                          | NA                          | R01_cb3341_c6/flp0/4031          |
| R01_cb10572_c1/f2p0/1064         | NA                        | NA                          | NA                          | R01_cb10572_c1/f2p0/1064         |
| R01_cb10549_c4/flp0/1005         | NA                        | R01_cb10549_c4/flp0/1005    | NA                          | NA                               |
| R01_cb16552_c0/flp0/1144         | NA                        | NA                          | NA                          | R01_cb16552_c0/flp0/1144         |
| R01_cb18456_c6765/flp0/576       | NA                        | NA                          | NA                          | R01_cb18456_c6765/flp0/576       |

|                             |                            |                             |                             |                             |
|-----------------------------|----------------------------|-----------------------------|-----------------------------|-----------------------------|
| R01_cb3026_c5/f1p0/2242     | NA                         | R01_cb3026_c5/f1p0/2242     | NA                          | NA                          |
| R01_cb8564_c17935/f1p0/3432 | NA                         | R01_cb8564_c17935/f1p0/3432 | R01_cb8564_c17935/f1p0/3432 | R01_cb8564_c17935/f1p0/3432 |
| R01_cb11315_c3/f1p0/2149    | NA                         | R01_cb11315_c3/f1p0/2149    | NA                          | NA                          |
| R01_cb8564_c2876/f1p0/2619  | NA                         | R01_cb8564_c2876/f1p0/2619  | NA                          | NA                          |
| R01_cb18456_c7280/f1p0/647  | NA                         | R01_cb18456_c7280/f1p0/647  | NA                          | R01_cb18456_c7280/f1p0/647  |
| R01_cb17299_c2/f1p0/801     | NA                         | NA                          | NA                          | R01_cb17299_c2/f1p0/801     |
| R01_cb9818_c3/f1p0/680      | NA                         | NA                          | NA                          | R01_cb9818_c3/f1p0/680      |
| R01_cb5172_c6/f1p0/3465     | NA                         | NA                          | NA                          | R01_cb5172_c6/f1p0/3465     |
| R01_cb8564_c4093/f1p0/2499  | R01_cb8564_c4093/f1p0/2499 | R01_cb8564_c4093/f1p0/2499  | R01_cb8564_c4093/f1p0/2499  | NA                          |
| R01_cb18409_c18/f3p0/453    | NA                         | R01_cb18409_c18/f3p0/453    | R01_cb18409_c18/f3p0/453    | R01_cb18409_c18/f3p0/453    |
| R01_cb8564_c10669/f1p0/3821 | NA                         | R01_cb8564_c10669/f1p0/3821 | R01_cb8564_c10669/f1p0/3821 | R01_cb8564_c10669/f1p0/3821 |
| R01_cb8564_c23042/f2p0/1986 | NA                         | R01_cb8564_c23042/f2p0/1986 | R01_cb8564_c23042/f2p0/1986 | R01_cb8564_c23042/f2p0/1986 |
| R01_cb12374_c5/f1p0/746     | R01_cb12374_c5/f1p0/746    | R01_cb12374_c5/f1p0/746     | R01_cb12374_c5/f1p0/746     | NA                          |
| R01_cb17925_c1/f1p0/1082    | NA                         | R01_cb17925_c1/f1p0/1082    | R01_cb17925_c1/f1p0/1082    | R01_cb17925_c1/f1p0/1082    |
| R01_cb6874_c8/f1p0/2553     | NA                         | NA                          | NA                          | R01_cb6874_c8/f1p0/2553     |
| R01_cb7087_c2/f1p0/2263     | NA                         | NA                          | NA                          | R01_cb7087_c2/f1p0/2263     |
| R01_cb10272_c24/f1p0/1559   | NA                         | NA                          | NA                          | R01_cb10272_c24/f1p0/1559   |
| R01_cb8564_c9751/f2p0/2617  | NA                         | R01_cb8564_c9751/f2p0/2617  | R01_cb8564_c9751/f2p0/2617  | R01_cb8564_c9751/f2p0/2617  |
| R01_cb18456_c7562/f1p0/331  | R01_cb18456_c7562/f1p0/331 | R01_cb18456_c7562/f1p0/331  | R01_cb18456_c7562/f1p0/331  | R01_cb18456_c7562/f1p0/331  |
| R01_cb1626_c6/f1p1/2824     | NA                         | NA                          | NA                          | R01_cb1626_c6/f1p1/2824     |
| R01_cb8062_c2/f1p0/2470     | NA                         | R01_cb8062_c2/f1p0/2470     | NA                          | NA                          |
| R01_cb13193_c12/f1p0/579    | R01_cb13193_c12/f1p0/579   | R01_cb13193_c12/f1p0/579    | R01_cb13193_c12/f1p0/579    | R01_cb13193_c12/f1p0/579    |
| R01_cb10572_c4/f1p0/1063    | NA                         | NA                          | NA                          | R01_cb10572_c4/f1p0/1063    |
| R01_cb14619_c0/f4p0/683     | R01_cb14619_c0/f4p0/683    | R01_cb14619_c0/f4p0/683     | R01_cb14619_c0/f4p0/683     | R01_cb14619_c0/f4p0/683     |
| R01_cb15959_c10/f1p0/821    | NA                         | R01_cb15959_c10/f1p0/821    | NA                          | R01_cb15959_c10/f1p0/821    |
| R01_cb454_c24/f1p0/2537     | NA                         | NA                          | NA                          | R01_cb454_c24/f1p0/2537     |

|                              |                             |                              |                              |                              |
|------------------------------|-----------------------------|------------------------------|------------------------------|------------------------------|
| R01_cb18456_c1365/f6p0/483   | R01_cb18456_c1365/f6p0/483  | R01_cb18456_c1365/f6p0/483   | R01_cb18456_c1365/f6p0/483   | R01_cb18456_c1365/f6p0/483   |
| R01_cb10880_c1/f6p1/750      | NA                          | NA                           | NA                           | R01_cb10880_c1/f6p1/750      |
| R01_cb8564_c37360/f1p0/4555  | R01_cb8564_c37360/f1p0/4555 | R01_cb8564_c37360/f1p0/4555  | R01_cb8564_c37360/f1p0/4555  | NA                           |
| R01_cb8564_c124644/f1p0/2236 | NA                          | R01_cb8564_c124644/f1p0/2236 | R01_cb8564_c124644/f1p0/2236 | R01_cb8564_c124644/f1p0/2236 |
| R01_cb4357_c0/f1p2/3359      | NA                          | R01_cb4357_c0/f1p2/3359      | NA                           | NA                           |
| R01_cb3054_c1/f1p0/3734      | NA                          | NA                           | NA                           | R01_cb3054_c1/f1p0/3734      |
| R01_cb12587_c9/f1p0/1679     | NA                          | NA                           | NA                           | R01_cb12587_c9/f1p0/1679     |
| R01_cb8564_c17029/f1p0/3716  | NA                          | NA                           | R01_cb8564_c17029/f1p0/3716  | NA                           |
| R01_cb8564_c71174/f1p0/3442  | NA                          | R01_cb8564_c71174/f1p0/3442  | R01_cb8564_c71174/f1p0/3442  | NA                           |
| R01_cb14758_c0/f1p0/1850     | NA                          | R01_cb14758_c0/f1p0/1850     | R01_cb14758_c0/f1p0/1850     | R01_cb14758_c0/f1p0/1850     |
| R01_cb8564_c50945/f1p0/2016  | NA                          | NA                           | R01_cb8564_c50945/f1p0/2016  | R01_cb8564_c50945/f1p0/2016  |
| R01_cb12579_c6/f1p0/887      | R01_cb12579_c6/f1p0/887     | R01_cb12579_c6/f1p0/887      | R01_cb12579_c6/f1p0/887      | R01_cb12579_c6/f1p0/887      |
| R01_cb8564_c13599/f1p0/2571  | NA                          | R01_cb8564_c13599/f1p0/2571  | NA                           | NA                           |
| R01_cb8564_c4615/f1p3/3089   | NA                          | R01_cb8564_c4615/f1p3/3089   | R01_cb8564_c4615/f1p3/3089   | R01_cb8564_c4615/f1p3/3089   |
| R01_cb8564_c81694/f1p0/2065  | NA                          | R01_cb8564_c81694/f1p0/2065  | NA                           | NA                           |
| R01_cb10425_c1/f2p1/1163     | NA                          | NA                           | R01_cb10425_c1/f2p1/1163     | R01_cb10425_c1/f2p1/1163     |
| R01_cb15768_c2/f1p0/1269     | NA                          | NA                           | NA                           | R01_cb15768_c2/f1p0/1269     |
| R01_cb9983_c1/f1p0/4616      | R01_cb9983_c1/f1p0/4616     | R01_cb9983_c1/f1p0/4616      | R01_cb9983_c1/f1p0/4616      | R01_cb9983_c1/f1p0/4616      |
| R01_cb12326_c0/f4p0/522      | NA                          | R01_cb12326_c0/f4p0/522      | NA                           | R01_cb12326_c0/f4p0/522      |
| R01_cb10779_c2/f1p0/681      | R01_cb10779_c2/f1p0/681     | R01_cb10779_c2/f1p0/681      | NA                           | NA                           |
| R01_cb1706_c1/f4p0/3014      | NA                          | NA                           | NA                           | R01_cb1706_c1/f4p0/3014      |
| R01_cb2205_c4/f1p1/1715      | NA                          | NA                           | NA                           | R01_cb2205_c4/f1p1/1715      |
| R01_cb14019_c3/f1p0/1373     | NA                          | R01_cb14019_c3/f1p0/1373     | R01_cb14019_c3/f1p0/1373     | R01_cb14019_c3/f1p0/1373     |
| R01_cb11542_c0/f1p0/562      | NA                          | NA                           | NA                           | R01_cb11542_c0/f1p0/562      |



|                              |    |                              |                             |                             |
|------------------------------|----|------------------------------|-----------------------------|-----------------------------|
| R01_cb8449_c1/f2p2/2097      | NA | NA                           | NA                          | R01_cb8449_c1/f2p2/2097     |
| R01_cb8564_c49888/flp0/2560  | NA | R01_cb8564_c49888/flp0/2560  | NA                          | R01_cb8564_c49888/flp0/2560 |
| R01_cb13334_c7/flp0/340      | NA | R01_cb13334_c7/flp0/340      | NA                          | R01_cb13334_c7/flp0/340     |
| R01_cb3808_c3/flp1/2690      | NA | NA                           | NA                          | R01_cb3808_c3/flp1/2690     |
| R01_cb9502_c0/flp0/2066      | NA | NA                           | NA                          | R01_cb9502_c0/flp0/2066     |
| R01_cb17633_c0/flp0/1362     | NA | R01_cb17633_c0/flp0/1362     | NA                          | NA                          |
| R01_cb11975_c4/flp1/1091     | NA | R01_cb11975_c4/flp1/1091     | R01_cb11975_c4/flp1/1091    | R01_cb11975_c4/flp1/1091    |
| R01_cb14739_c1/flp1/676      | NA | R01_cb14739_c1/flp1/676      | NA                          | R01_cb14739_c1/flp1/676     |
| R01_cb8564_c125834/flp0/1917 | NA | R01_cb8564_c125834/flp0/1917 | NA                          | NA                          |
| R01_cb5190_c10/flp0/1874     | NA | NA                           | NA                          | R01_cb5190_c10/flp0/1874    |
| R01_cb11479_c1/flp0/2264     | NA | NA                           | NA                          | R01_cb11479_c1/flp0/2264    |
| R01_cb6111_c27/flp0/1495     | NA | R01_cb6111_c27/flp0/1495     | NA                          | NA                          |
| R01_cb7248_c2/flp0/1330      | NA | NA                           | NA                          | R01_cb7248_c2/flp0/1330     |
| R01_cb3695_c2/flp1/2846      | NA | NA                           | NA                          | R01_cb3695_c2/flp1/2846     |
| R01_cb8324_c4/flp0/2447      | NA | NA                           | R01_cb8324_c4/flp0/2447     | R01_cb8324_c4/flp0/2447     |
| R01_cb4870_c0/flp0/3229      | NA | R01_cb4870_c0/flp0/3229      | NA                          | NA                          |
| R01_cb7191_c19/flp0/724      | NA | R01_cb7191_c19/flp0/724      | NA                          | NA                          |
| R01_cb13478_c16/f5p1/508     | NA | R01_cb13478_c16/f5p1/508     | R01_cb13478_c16/f5p1/508    | R01_cb13478_c16/f5p1/508    |
| R01_cb9432_c0/f2p0/2062      | NA | NA                           | NA                          | R01_cb9432_c0/f2p0/2062     |
| R01_cb8564_c53118/flp0/2515  | NA | NA                           | NA                          | R01_cb8564_c53118/flp0/2515 |
| R01_cb8564_c117861/flp0/2243 | NA | R01_cb8564_c117861/flp0/2243 | NA                          | NA                          |
| R01_cb11483_c0/flp0/1580     | NA | NA                           | NA                          | R01_cb11483_c0/flp0/1580    |
| R01_cb8564_c91900/flp0/3885  | NA | NA                           | R01_cb8564_c91900/flp0/3885 | NA                          |
| R01_cb14985_c3/flp0/1302     | NA | NA                           | NA                          | R01_cb14985_c3/flp0/1302    |

|                             |                             |                             |                             |                             |
|-----------------------------|-----------------------------|-----------------------------|-----------------------------|-----------------------------|
| R01_cb8564_c53630/flp0/2621 | NA                          | R01_cb8564_c53630/flp0/2621 | R01_cb8564_c53630/flp0/2621 | R01_cb8564_c53630/flp0/2621 |
| R01_cb14702_c4/flp0/535     | NA                          | R01_cb14702_c4/flp0/535     | NA                          | NA                          |
| R01_cb3526_c9/flp0/2691     | NA                          | NA                          | NA                          | R01_cb3526_c9/flp0/2691     |
| R01_cb8564_c69796/flp0/2630 | NA                          | R01_cb8564_c69796/flp0/2630 | NA                          | NA                          |
| R01_cb13217_c4/flp0/1250    | NA                          | R01_cb13217_c4/flp0/1250    | R01_cb13217_c4/flp0/1250    | R01_cb13217_c4/flp0/1250    |
| R01_cb8564_c82514/flp0/2202 | NA                          | R01_cb8564_c82514/flp0/2202 | NA                          | R01_cb8564_c82514/flp0/2202 |
| R01_cb18010_c0/flp0/747     | NA                          | R01_cb18010_c0/flp0/747     | R01_cb18010_c0/flp0/747     | R01_cb18010_c0/flp0/747     |
| R01_cb16293_c14/flp0/921    | NA                          | R01_cb16293_c14/flp0/921    | NA                          | R01_cb16293_c14/flp0/921    |
| R01_cb6332_c3/flp0/2116     | NA                          | R01_cb6332_c3/flp0/2116     | NA                          | R01_cb6332_c3/flp0/2116     |
| R01_cb11193_c1/flp0/2732    | NA                          | R01_cb11193_c1/flp0/2732    | NA                          | NA                          |
| R01_cb6081_c2/flp0/2993     | R01_cb6081_c2/flp0/2993     | R01_cb6081_c2/flp0/2993     | R01_cb6081_c2/flp0/2993     | R01_cb6081_c2/flp0/2993     |
| R01_cb8564_c90226/flp0/2290 | R01_cb8564_c90226/flp0/2290 | R01_cb8564_c90226/flp0/2290 | R01_cb8564_c90226/flp0/2290 | R01_cb8564_c90226/flp0/2290 |
| R01_cb12785_c16/flp0/1203   | NA                          | NA                          | R01_cb12785_c16/flp0/1203   | NA                          |
| R01_cb5676_c4/flp0/2818     | NA                          | NA                          | NA                          | R01_cb5676_c4/flp0/2818     |
| R01_cb11032_c1/flp0/2619    | NA                          | NA                          | NA                          | R01_cb11032_c1/flp0/2619    |
| R01_cb2302_c3/flp0/4027     | NA                          | R01_cb2302_c3/flp0/4027     | NA                          | NA                          |
| R01_cb6393_c6/flp0/2088     | NA                          | NA                          | NA                          | R01_cb6393_c6/flp0/2088     |
| R01_cb14709_c16/flp0/1225   | NA                          | R01_cb14709_c16/flp0/1225   | NA                          | NA                          |
| R01_cb13652_c0/f2p1/1268    | NA                          | R01_cb13652_c0/f2p1/1268    | NA                          | NA                          |
| R01_cb17997_c8/f9p1/1015    | NA                          | R01_cb17997_c8/f9p1/1015    | NA                          | R01_cb17997_c8/f9p1/1015    |
| R01_cb261_c45/flp0/1957     | NA                          | NA                          | NA                          | R01_cb261_c45/flp0/1957     |
| R01_cb6718_c6/flp0/2064     | NA                          | R01_cb6718_c6/flp0/2064     | NA                          | R01_cb6718_c6/flp0/2064     |
| R01_cb8564_c46752/flp0/1940 | NA                          | NA                          | NA                          | R01_cb8564_c46752/flp0/1940 |
| R01_cb8037_c6/flp0/1299     | NA                          | NA                          | NA                          | R01_cb8037_c6/flp0/1299     |
| R01_cb6365_c20/flp0/777     | R01_cb6365_c20/flp0/777     | R01_cb6365_c20/flp0/777     | R01_cb6365_c20/flp0/777     | R01_cb6365_c20/flp0/777     |

|                              |                             |                             |                              |                              |
|------------------------------|-----------------------------|-----------------------------|------------------------------|------------------------------|
| R01_cb4370_c3/flp0/3357      | NA                          | NA                          | NA                           | R01_cb4370_c3/flp0/3357      |
| R01_cb9512_c9/flp0/2068      | NA                          | R01_cb9512_c9/flp0/2068     | NA                           | NA                           |
| R01_cb352_c3/flp0/2624       | NA                          | NA                          | NA                           | R01_cb352_c3/flp0/2624       |
| R01_cb7962_c3/f2p0/2206      | NA                          | NA                          | NA                           | R01_cb7962_c3/f2p0/2206      |
| R01_cb10049_c1/flp0/2124     | R01_cb10049_c1/flp0/2124    | R01_cb10049_c1/flp0/2124    | R01_cb10049_c1/flp0/2124     | R01_cb10049_c1/flp0/2124     |
| R01_cb5287_c8/flp0/1706      | NA                          | R01_cb5287_c8/flp0/1706     | NA                           | NA                           |
| R01_cb11081_c3/flp0/2748     | NA                          | NA                          | R01_cb11081_c3/flp0/2748     | R01_cb11081_c3/flp0/2748     |
| R01_cb18287_c2/flp0/1786     | NA                          | NA                          | R01_cb18287_c2/flp0/1786     | NA                           |
| R01_cb8564_c111232/flp0/2097 | NA                          | NA                          | R01_cb8564_c111232/flp0/2097 | R01_cb8564_c111232/flp0/2097 |
| R01_cb15514_c1/flp0/1477     | NA                          | R01_cb15514_c1/flp0/1477    | R01_cb15514_c1/flp0/1477     | R01_cb15514_c1/flp0/1477     |
| R01_cb9993_c1/flp0/1883      | NA                          | R01_cb9993_c1/flp0/1883     | NA                           | R01_cb9993_c1/flp0/1883      |
| R01_cb3079_c4/flp0/2325      | NA                          | R01_cb3079_c4/flp0/2325     | NA                           | R01_cb3079_c4/flp0/2325      |
| R01_cb14316_c20/flp0/1079    | NA                          | NA                          | R01_cb14316_c20/flp0/1079    | R01_cb14316_c20/flp0/1079    |
| R01_cb13910_c12/flp0/1443    | NA                          | R01_cb13910_c12/flp0/1443   | R01_cb13910_c12/flp0/1443    | R01_cb13910_c12/flp0/1443    |
| R01_cb9985_c1/flp0/2529      | R01_cb9985_c1/flp0/2529     | R01_cb9985_c1/flp0/2529     | NA                           | NA                           |
| R01_cb11844_c1/flp0/1879     | R01_cb11844_c1/flp0/1879    | R01_cb11844_c1/flp0/1879    | R01_cb11844_c1/flp0/1879     | R01_cb11844_c1/flp0/1879     |
| R01_cb10873_c4/flp0/1374     | NA                          | NA                          | NA                           | R01_cb10873_c4/flp0/1374     |
| R01_cb8564_c90205/flp0/2522  | R01_cb8564_c90205/flp0/2522 | R01_cb8564_c90205/flp0/2522 | NA                           | R01_cb8564_c90205/flp0/2522  |
| R01_cb6204_c6/flp1/2162      | NA                          | NA                          | NA                           | R01_cb6204_c6/flp1/2162      |
| R01_cb14337_c6/flp0/978      | R01_cb14337_c6/flp0/978     | R01_cb14337_c6/flp0/978     | R01_cb14337_c6/flp0/978      | R01_cb14337_c6/flp0/978      |
| R01_cb1016_c2/flp0/4525      | NA                          | R01_cb1016_c2/flp0/4525     | NA                           | NA                           |
| R01_cb119_c9/flp0/4967       | NA                          | NA                          | NA                           | R01_cb119_c9/flp0/4967       |
| R01_cb10720_c2/flp1/1093     | NA                          | NA                          | NA                           | R01_cb10720_c2/flp1/1093     |
| R01_cb8692_c9/flp0/1475      | R01_cb8692_c9/flp0/1475     | R01_cb8692_c9/flp0/1475     | R01_cb8692_c9/flp0/1475      | R01_cb8692_c9/flp0/1475      |

|                             |                             |                             |                             |                             |
|-----------------------------|-----------------------------|-----------------------------|-----------------------------|-----------------------------|
| R01_cb7964_c1/f2p2/2299     | NA                          | NA                          | NA                          | R01_cb7964_c1/f2p2/2299     |
| R01_cb6802_c22/f1p1/2325    | NA                          | R01_cb6802_c22/f1p1/2325    | NA                          | NA                          |
| R01_cb12096_c0/f1p0/770     | R01_cb12096_c0/f1p0/770     | R01_cb12096_c0/f1p0/770     | R01_cb12096_c0/f1p0/770     | R01_cb12096_c0/f1p0/770     |
| R01_cb3390_c1/f2p0/1899     | NA                          | R01_cb3390_c1/f2p0/1899     | NA                          | NA                          |
| R01_cb9351_c1/f1p0/1917     | NA                          | R01_cb9351_c1/f1p0/1917     | R01_cb9351_c1/f1p0/1917     | NA                          |
| R01_cb14067_c4/f1p0/1862    | NA                          | NA                          | R01_cb14067_c4/f1p0/1862    | R01_cb14067_c4/f1p0/1862    |
| R01_cb8564_c3079/f1p0/2671  | R01_cb8564_c3079/f1p0/2671  | R01_cb8564_c3079/f1p0/2671  | NA                          | NA                          |
| R01_cb15168_c3/f1p0/1481    | NA                          | NA                          | NA                          | R01_cb15168_c3/f1p0/1481    |
| R01_cb8564_c43594/f1p1/3729 | NA                          | R01_cb8564_c43594/f1p1/3729 | R01_cb8564_c43594/f1p1/3729 | R01_cb8564_c43594/f1p1/3729 |
| R01_cb8564_c77641/f1p0/3884 | NA                          | R01_cb8564_c77641/f1p0/3884 | NA                          | NA                          |
| R01_cb18632_c11/f1p0/5362   | NA                          | NA                          | NA                          | R01_cb18632_c11/f1p0/5362   |
| R01_cb8564_c80249/f1p0/3633 | NA                          | R01_cb8564_c80249/f1p0/3633 | NA                          | R01_cb8564_c80249/f1p0/3633 |
| R01_cb12427_c3/f1p0/1826    | NA                          | R01_cb12427_c3/f1p0/1826    | R01_cb12427_c3/f1p0/1826    | R01_cb12427_c3/f1p0/1826    |
| R01_cb8564_c86656/f1p0/3356 | NA                          | NA                          | NA                          | R01_cb8564_c86656/f1p0/3356 |
| R01_cb6_c8/f1p0/3736        | NA                          | R01_cb6_c8/f1p0/3736        | NA                          | NA                          |
| R01_cb9610_c1/f1p0/2045     | NA                          | NA                          | NA                          | R01_cb9610_c1/f1p0/2045     |
| R01_cb16956_c1/f1p0/696     | NA                          | R01_cb16956_c1/f1p0/696     | R01_cb16956_c1/f1p0/696     | R01_cb16956_c1/f1p0/696     |
| R01_cb17354_c3/f1p0/1686    | NA                          | NA                          | NA                          | R01_cb17354_c3/f1p0/1686    |
| R01_cb5717_c2/f1p0/4037     | NA                          | NA                          | NA                          | R01_cb5717_c2/f1p0/4037     |
| R01_cb18456_c1654/f2p0/898  | NA                          | NA                          | NA                          | R01_cb18456_c1654/f2p0/898  |
| R01_cb8564_c3743/f1p1/3652  | NA                          | R01_cb8564_c3743/f1p1/3652  | R01_cb8564_c3743/f1p1/3652  | R01_cb8564_c3743/f1p1/3652  |
| R01_cb8564_c125560/f1p0/225 | R01_cb8564_c125560/f1p0/225 | R01_cb8564_c125560/f1p0/225 | R01_cb8564_c125560/f1p0/225 | R01_cb8564_c125560/f1p0/225 |
| 4                           | 54                          | 4                           | 4                           | 4                           |
| R01_cb3641_c0/f3p0/623      | R01_cb3641_c0/f3p0/623      | R01_cb3641_c0/f3p0/623      | NA                          | NA                          |
| R01_cb8725_c0/f1p0/2288     | NA                          | R01_cb8725_c0/f1p0/2288     | NA                          | NA                          |
| R01_cb8564_c126861/f1p0/203 | NA                          | R01_cb8564_c126861/f1p0/203 | R01_cb8564_c126861/f1p0/203 | R01_cb8564_c126861/f1p0/203 |

|                             |                             |                             |                         |                             |
|-----------------------------|-----------------------------|-----------------------------|-------------------------|-----------------------------|
| 9                           |                             | 9                           | 9                       | 9                           |
| R01_cb124_c29/f1p0/2489     | NA                          | NA                          | NA                      | R01_cb124_c29/f1p0/2489     |
| R01_cb12421_c23/f1p0/561    | NA                          | R01_cb12421_c23/f1p0/561    | NA                      | NA                          |
| R01_cb438_c14/f1p1/825      | NA                          | NA                          | NA                      | R01_cb438_c14/f1p1/825      |
| R01_cb6446_c14/f7p0/600     | NA                          | R01_cb6446_c14/f7p0/600     | NA                      | NA                          |
| R01_cb15102_c2/f1p0/764     | NA                          | NA                          | NA                      | R01_cb15102_c2/f1p0/764     |
| R01_cb15562_c4/f1p0/1499    | NA                          | R01_cb15562_c4/f1p0/1499    | NA                      | R01_cb15562_c4/f1p0/1499    |
| R01_cb10659_c5/f1p0/766     | R01_cb10659_c5/f1p0/766     | R01_cb10659_c5/f1p0/766     | NA                      | R01_cb10659_c5/f1p0/766     |
| R01_cb506_c1/f1p0/4782      | NA                          | NA                          | NA                      | R01_cb506_c1/f1p0/4782      |
| R01_cb1938_c0/f2p0/2341     | NA                          | NA                          | NA                      | R01_cb1938_c0/f2p0/2341     |
| R01_cb18456_c6117/f1p0/696  | NA                          | NA                          | NA                      | R01_cb18456_c6117/f1p0/696  |
| R01_cb8281_c7/f1p0/2303     | NA                          | NA                          | NA                      | R01_cb8281_c7/f1p0/2303     |
| R01_cb2494_c3/f15p0/975     | R01_cb2494_c3/f15p0/975     | R01_cb2494_c3/f15p0/975     | R01_cb2494_c3/f15p0/975 | R01_cb2494_c3/f15p0/975     |
| R01_cb3426_c20/f1p0/3131    | NA                          | NA                          | NA                      | R01_cb3426_c20/f1p0/3131    |
| R01_cb6286_c10/f1p1/2556    | NA                          | NA                          | NA                      | R01_cb6286_c10/f1p1/2556    |
| R01_cb16769_c0/f1p0/664     | NA                          | R01_cb16769_c0/f1p0/664     | R01_cb16769_c0/f1p0/664 | R01_cb16769_c0/f1p0/664     |
| R01_cb17458_c2/f1p0/779     | NA                          | NA                          | NA                      | R01_cb17458_c2/f1p0/779     |
| R01_cb8564_c82850/f1p0/2031 | NA                          | R01_cb8564_c82850/f1p0/2031 | NA                      | NA                          |
| R01_cb8564_c1109/f1p0/2071  | NA                          | R01_cb8564_c1109/f1p0/2071  | NA                      | R01_cb8564_c1109/f1p0/2071  |
| R01_cb3872_c2/f1p1/623      | NA                          | R01_cb3872_c2/f1p1/623      | NA                      | R01_cb3872_c2/f1p1/623      |
| R01_cb2314_c4/f1p0/3457     | NA                          | R01_cb2314_c4/f1p0/3457     | NA                      | NA                          |
| R01_cb8564_c16081/f1p0/3057 | R01_cb8564_c16081/f1p0/3057 | R01_cb8564_c16081/f1p0/3057 | NA                      | R01_cb8564_c16081/f1p0/3057 |
| R01_cb6356_c5/f1p0/1477     | NA                          | R01_cb6356_c5/f1p0/1477     | R01_cb6356_c5/f1p0/1477 | R01_cb6356_c5/f1p0/1477     |
| R01_cb6823_c1/f1p0/2285     | NA                          | NA                          | NA                      | R01_cb6823_c1/f1p0/2285     |
| R01_cb5565_c60/f1p0/2829    | NA                          | R01_cb5565_c60/f1p0/2829    | NA                      | NA                          |

|                              |                            |                              |                              |                              |
|------------------------------|----------------------------|------------------------------|------------------------------|------------------------------|
| R01_cb6982_c0/f2p0/2725      | NA                         | R01_cb6982_c0/f2p0/2725      | R01_cb6982_c0/f2p0/2725      | NA                           |
| R01_cb18456_c1326/f2p0/510   | R01_cb18456_c1326/f2p0/510 | R01_cb18456_c1326/f2p0/510   | R01_cb18456_c1326/f2p0/510   | R01_cb18456_c1326/f2p0/510   |
| R01_cb18456_c6454/f1p0/992   | R01_cb18456_c6454/f1p0/992 | R01_cb18456_c6454/f1p0/992   | NA                           | R01_cb18456_c6454/f1p0/992   |
| R01_cb8564_c80568/f1p0/3614  | NA                         | NA                           | NA                           | R01_cb8564_c80568/f1p0/3614  |
| R01_cb9380_c11/f2p0/1933     | NA                         | NA                           | NA                           | R01_cb9380_c11/f2p0/1933     |
| R01_cb15023_c0/f2p0/1549     | NA                         | NA                           | NA                           | R01_cb15023_c0/f2p0/1549     |
| R01_cb10420_c7/f1p0/1848     | NA                         | NA                           | NA                           | R01_cb10420_c7/f1p0/1848     |
| R01_cb2950_c15/f1p0/606      | NA                         | R01_cb2950_c15/f1p0/606      | NA                           | R01_cb2950_c15/f1p0/606      |
| R01_cb13426_c2/f1p0/924      | NA                         | R01_cb13426_c2/f1p0/924      | NA                           | NA                           |
| R01_cb1813_c9/f1p0/2541      | NA                         | NA                           | NA                           | R01_cb1813_c9/f1p0/2541      |
| R01_cb10015_c307/f1p3/635    | R01_cb10015_c307/f1p3/635  | R01_cb10015_c307/f1p3/635    | R01_cb10015_c307/f1p3/635    | NA                           |
| R01_cb7738_c4/f1p0/2536      | NA                         | NA                           | NA                           | R01_cb7738_c4/f1p0/2536      |
| R01_cb6906_c5/f1p1/4379      | NA                         | R01_cb6906_c5/f1p1/4379      | R01_cb6906_c5/f1p1/4379      | R01_cb6906_c5/f1p1/4379      |
| R01_cb763_c9/f1p0/942        | R01_cb763_c9/f1p0/942      | R01_cb763_c9/f1p0/942        | R01_cb763_c9/f1p0/942        | R01_cb763_c9/f1p0/942        |
| R01_cb10323_c2/f1p0/2774     | NA                         | NA                           | R01_cb10323_c2/f1p0/2774     | NA                           |
| R01_cb15458_c2/f1p0/1574     | NA                         | R01_cb15458_c2/f1p0/1574     | NA                           | R01_cb15458_c2/f1p0/1574     |
| R01_cb8564_c17244/f1p0/3238  | NA                         | NA                           | NA                           | R01_cb8564_c17244/f1p0/3238  |
| R01_cb18456_c7238/f1p0/632   | NA                         | R01_cb18456_c7238/f1p0/632   | R01_cb18456_c7238/f1p0/632   | R01_cb18456_c7238/f1p0/632   |
| R01_cb5900_c50/f1p0/3583     | R01_cb5900_c50/f1p0/3583   | R01_cb5900_c50/f1p0/3583     | NA                           | NA                           |
| R01_cb9423_c1/f1p0/3076      | R01_cb9423_c1/f1p0/3076    | R01_cb9423_c1/f1p0/3076      | NA                           | R01_cb9423_c1/f1p0/3076      |
| R01_cb11085_c0/f1p0/1465     | NA                         | NA                           | NA                           | R01_cb11085_c0/f1p0/1465     |
| R01_cb8564_c122381/f1p0/2410 | NA                         | R01_cb8564_c122381/f1p0/2410 | R01_cb8564_c122381/f1p0/2410 | R01_cb8564_c122381/f1p0/2410 |
| R01_cb3071_c1/f1p0/3725      | NA                         | R01_cb3071_c1/f1p0/3725      | NA                           | R01_cb3071_c1/f1p0/3725      |
| R01_cb4038_c3/f1p0/2343      | NA                         | R01_cb4038_c3/f1p0/2343      | NA                           | NA                           |
| R01_cb18456_c1884/f1p0/561   | R01_cb18456_c1884/f1p0/561 | R01_cb18456_c1884/f1p0/561   | R01_cb18456_c1884/f1p0/561   | R01_cb18456_c1884/f1p0/561   |

|                             |                             |                             |                             |                             |
|-----------------------------|-----------------------------|-----------------------------|-----------------------------|-----------------------------|
| R01_cb16098_c4/flp0/754     | NA                          | R01_cb16098_c4/flp0/754     | R01_cb16098_c4/flp0/754     | R01_cb16098_c4/flp0/754     |
| R01_cb8564_c122234/flp1/278 | NA                          | R01_cb8564_c122234/flp1/278 | NA                          | NA                          |
| 6                           |                             | 6                           |                             |                             |
| R01_cb8564_c43113/flp0/4042 | NA                          | R01_cb8564_c43113/flp0/4042 | NA                          | R01_cb8564_c43113/flp0/4042 |
| R01_cb14146_c3/flp0/1425    | NA                          | NA                          | NA                          | R01_cb14146_c3/flp0/1425    |
| R01_cb16739_c4/f2p0/703     | NA                          | NA                          | NA                          | R01_cb16739_c4/f2p0/703     |
| R01_cb18208_c0/f2p0/1087    | NA                          | R01_cb18208_c0/f2p0/1087    | R01_cb18208_c0/f2p0/1087    | R01_cb18208_c0/f2p0/1087    |
| R01_cb2252_c1/flp0/4037     | NA                          | NA                          | NA                          | R01_cb2252_c1/flp0/4037     |
| R01_cb8564_c122395/flp0/222 | NA                          | NA                          | NA                          | R01_cb8564_c122395/flp0/222 |
| 9                           |                             |                             |                             | 9                           |
| R01_cb16027_c7/flp0/969     | NA                          | R01_cb16027_c7/flp0/969     | NA                          | NA                          |
| R01_cb15797_c3/flp0/1081    | NA                          | NA                          | NA                          | R01_cb15797_c3/flp0/1081    |
| R01_cb10291_c3/flp0/1527    | NA                          | R01_cb10291_c3/flp0/1527    | NA                          | R01_cb10291_c3/flp0/1527    |
| R01_cb10246_c4/flp1/2420    | NA                          | R01_cb10246_c4/flp1/2420    | NA                          | NA                          |
| R01_cb709_c19/flp0/1584     | R01_cb709_c19/flp0/1584     | R01_cb709_c19/flp0/1584     | R01_cb709_c19/flp0/1584     | R01_cb709_c19/flp0/1584     |
| R01_cb7178_c2/flp0/2582     | NA                          | R01_cb7178_c2/flp0/2582     | NA                          | NA                          |
| R01_cb17986_c1/flp0/1442    | NA                          | NA                          | NA                          | R01_cb17986_c1/flp0/1442    |
| R01_cb4708_c6/flp0/2403     | NA                          | R01_cb4708_c6/flp0/2403     | NA                          | NA                          |
| R01_cb709_c5/flp0/3139      | NA                          | NA                          | R01_cb709_c5/flp0/3139      | R01_cb709_c5/flp0/3139      |
| R01_cb4825_c12/flp0/4476    | NA                          | NA                          | NA                          | R01_cb4825_c12/flp0/4476    |
| R01_cb12057_c34/flp1/1327   | NA                          | R01_cb12057_c34/flp1/1327   | NA                          | NA                          |
| R01_cb3602_c7/flp2/2820     | NA                          | R01_cb3602_c7/flp2/2820     | NA                          | NA                          |
| R01_cb14747_c0/f2p0/1174    | NA                          | R01_cb14747_c0/f2p0/1174    | R01_cb14747_c0/f2p0/1174    | R01_cb14747_c0/f2p0/1174    |
| R01_cb2770_c64/flp0/2189    | NA                          | R01_cb2770_c64/flp0/2189    | R01_cb2770_c64/flp0/2189    | R01_cb2770_c64/flp0/2189    |
| R01_cb5633_c81/flp0/2727    | NA                          | R01_cb5633_c81/flp0/2727    | NA                          | NA                          |
| R01_cb8564_c109312/f6p1/297 | R01_cb8564_c109312/f6p1/297 | R01_cb8564_c109312/f6p1/297 | R01_cb8564_c109312/f6p1/297 | R01_cb8564_c109312/f6p1/297 |

|                             |                             |                             |                             |                             |
|-----------------------------|-----------------------------|-----------------------------|-----------------------------|-----------------------------|
| 8                           | 78                          | 8                           | 8                           | 8                           |
| R01_cb3000_c1/flp0/2248     | NA                          | R01_cb3000_c1/flp0/2248     | R01_cb3000_c1/flp0/2248     | R01_cb3000_c1/flp0/2248     |
| R01_cb3309_c11/flp0/1951    | NA                          | R01_cb3309_c11/flp0/1951    | NA                          | NA                          |
| R01_cb4368_c11/flp0/1240    | NA                          | NA                          | NA                          | R01_cb4368_c11/flp0/1240    |
| R01_cb6615_c19/flp0/1446    | NA                          | NA                          | NA                          | R01_cb6615_c19/flp0/1446    |
| R01_cb8564_c87244/flp0/4403 | NA                          | NA                          | NA                          | R01_cb8564_c87244/flp0/4403 |
| R01_cb16657_c2/flp0/854     | NA                          | NA                          | NA                          | R01_cb16657_c2/flp0/854     |
| R01_cb7948_c0/f2p1/2493     | NA                          | NA                          | NA                          | R01_cb7948_c0/f2p1/2493     |
| R01_cb8564_c110681/flp0/271 | R01_cb8564_c110681/flp0/271 | R01_cb8564_c110681/flp0/271 | NA                          | NA                          |
| 6                           | 16                          | 6                           | NA                          | R01_cb5943_c5/flp0/1383     |
| R01_cb5943_c5/flp0/1383     | NA                          | NA                          | NA                          | NA                          |
| R01_cb4242_c1/flp0/3142     | NA                          | R01_cb4242_c1/flp0/3142     | NA                          | NA                          |
| R01_cb18456_c7489/flp0/1815 | NA                          | R01_cb18456_c7489/flp0/1815 | R01_cb18456_c7489/flp0/1815 | NA                          |
| R01_cb8564_c1210/flp0/2120  | NA                          | R01_cb8564_c1210/flp0/2120  | NA                          | NA                          |
| R01_cb18409_c13/f5p0/652    | NA                          | R01_cb18409_c13/f5p0/652    | R01_cb18409_c13/f5p0/652    | R01_cb18409_c13/f5p0/652    |
| R01_cb7693_c2/flp0/2493     | NA                          | NA                          | R01_cb7693_c2/flp0/2493     | R01_cb7693_c2/flp0/2493     |
| R01_cb2095_c14/flp0/4037    | NA                          | NA                          | NA                          | R01_cb2095_c14/flp0/4037    |
| R01_cb11102_c3/flp0/1143    | NA                          | NA                          | NA                          | R01_cb11102_c3/flp0/1143    |
| R01_cb12852_c4/flp0/1014    | NA                          | NA                          | R01_cb12852_c4/flp0/1014    | R01_cb12852_c4/flp0/1014    |
| R01_cb12769_c0/f2p0/1303    | NA                          | NA                          | NA                          | R01_cb12769_c0/f2p0/1303    |
| R01_cb5896_c158/flp0/2497   | NA                          | NA                          | NA                          | R01_cb5896_c158/flp0/2497   |
| R01_cb7595_c18/flp0/771     | R01_cb7595_c18/flp0/771     | R01_cb7595_c18/flp0/771     | R01_cb7595_c18/flp0/771     | R01_cb7595_c18/flp0/771     |
| R01_cb8171_c5/flp0/395      | NA                          | R01_cb8171_c5/flp0/395      | NA                          | NA                          |
| R01_cb8345_c2/flp0/2284     | NA                          | NA                          | NA                          | R01_cb8345_c2/flp0/2284     |
| R01_cb8564_c2026/flp0/3142  | NA                          | R01_cb8564_c2026/flp0/3142  | NA                          | NA                          |
| R01_cb2959_c1/flp0/3734     | NA                          | NA                          | NA                          | R01_cb2959_c1/flp0/3734     |



|                             |                             |                             |                             |                             |
|-----------------------------|-----------------------------|-----------------------------|-----------------------------|-----------------------------|
| R01_cb13363_c1/flp0/1680    | NA                          | R01_cb13363_c1/flp0/1680    | NA                          | NA                          |
| R01_cb10392_c2/flp0/797     | NA                          | R01_cb10392_c2/flp0/797     | NA                          | NA                          |
| R01_cb13334_c5/flp0/1152    | NA                          | R01_cb13334_c5/flp0/1152    | NA                          | NA                          |
| R01_cb12442_c4/flp0/1027    | NA                          | R01_cb12442_c4/flp0/1027    | NA                          | R01_cb12442_c4/flp0/1027    |
| R01_cb16794_c2/flp0/868     | R01_cb16794_c2/flp0/868     | R01_cb16794_c2/flp0/868     | R01_cb16794_c2/flp0/868     | R01_cb16794_c2/flp0/868     |
| R01_cb8564_c37627/flp0/2498 | NA                          | R01_cb8564_c37627/flp0/2498 | NA                          | NA                          |
| R01_cb8564_c71355/flp0/2540 | NA                          | R01_cb8564_c71355/flp0/2540 | R01_cb8564_c71355/flp0/2540 | R01_cb8564_c71355/flp0/2540 |
| R01_cb8564_c18383/flp1/3801 | NA                          | R01_cb8564_c18383/flp1/3801 | NA                          | NA                          |
| R01_cb13203_c3/flp1/943     | NA                          | R01_cb13203_c3/flp1/943     | NA                          | NA                          |
| R01_cb8793_c1/flp0/540      | R01_cb8793_c1/flp0/540      | R01_cb8793_c1/flp0/540      | R01_cb8793_c1/flp0/540      | R01_cb8793_c1/flp0/540      |
| R01_cb9846_c1/flp0/2044     | NA                          | R01_cb9846_c1/flp0/2044     | R01_cb9846_c1/flp0/2044     | R01_cb9846_c1/flp0/2044     |
| R01_cb4501_c5/flp0/3632     | NA                          | NA                          | NA                          | R01_cb4501_c5/flp0/3632     |
| R01_cb7257_c4/flp0/2327     | NA                          | NA                          | NA                          | R01_cb7257_c4/flp0/2327     |
| R01_cb8564_c41939/flp0/2349 | NA                          | R01_cb8564_c41939/flp0/2349 | NA                          | NA                          |
| R01_cb12785_c12/flp0/738    | NA                          | R01_cb12785_c12/flp0/738    | R01_cb12785_c12/flp0/738    | R01_cb12785_c12/flp0/738    |
| R01_cb8564_c80794/flp0/2427 | R01_cb8564_c80794/flp0/2427 | R01_cb8564_c80794/flp0/2427 | R01_cb8564_c80794/flp0/2427 | R01_cb8564_c80794/flp0/2427 |
| R01_cb15101_c4/flp0/424     | NA                          | NA                          | R01_cb15101_c4/flp0/424     | R01_cb15101_c4/flp0/424     |
| R01_cb6464_c5/flp0/2806     | NA                          | NA                          | NA                          | R01_cb6464_c5/flp0/2806     |
| R01_cb17582_c1/flp0/1745    | NA                          | R01_cb17582_c1/flp0/1745    | R01_cb17582_c1/flp0/1745    | R01_cb17582_c1/flp0/1745    |
| R01_cb8914_c7/flp0/2021     | NA                          | R01_cb8914_c7/flp0/2021     | NA                          | NA                          |
| R01_cb12352_c11/flp0/505    | R01_cb12352_c11/flp0/505    | R01_cb12352_c11/flp0/505    | R01_cb12352_c11/flp0/505    | R01_cb12352_c11/flp0/505    |
| R01_cb8564_c87286/flp0/2748 | R01_cb8564_c87286/flp0/2748 | R01_cb8564_c87286/flp0/2748 | R01_cb8564_c87286/flp0/2748 | R01_cb8564_c87286/flp0/2748 |
| R01_cb16766_c1/flp0/992     | NA                          | NA                          | NA                          | R01_cb16766_c1/flp0/992     |
| R01_cb12119_c11/flp0/945    | NA                          | NA                          | NA                          | R01_cb12119_c11/flp0/945    |

|                                  |                          |                                  |                                  |                                  |
|----------------------------------|--------------------------|----------------------------------|----------------------------------|----------------------------------|
| R01_cb16749_c6/f1p0/862          | R01_cb16749_c6/f1p0/862  | R01_cb16749_c6/f1p0/862          | NA                               | NA                               |
| R01_cb8564_c24102/f1p0/2869      | NA                       | R01_cb8564_c24102/f1p0/2869      | NA                               | NA                               |
| R01_cb17756_c5/f2p0/334          | R01_cb17756_c5/f2p0/334  | R01_cb17756_c5/f2p0/334          | R01_cb17756_c5/f2p0/334          | R01_cb17756_c5/f2p0/334          |
| R01_cb8564_c128307/f1p0/277<br>6 | NA                       | R01_cb8564_c128307/f1p0/277<br>6 | R01_cb8564_c128307/f1p0/277<br>6 | R01_cb8564_c128307/f1p0/277<br>6 |
| R01_cb13979_c28/f1p0/580         | NA                       | R01_cb13979_c28/f1p0/580         | R01_cb13979_c28/f1p0/580         | R01_cb13979_c28/f1p0/580         |
| R01_cb4708_c20/f1p0/613          | NA                       | NA                               | R01_cb4708_c20/f1p0/613          | R01_cb4708_c20/f1p0/613          |
| R01_cb11932_c21/f1p0/360         | R01_cb11932_c21/f1p0/360 | R01_cb11932_c21/f1p0/360         | R01_cb11932_c21/f1p0/360         | R01_cb11932_c21/f1p0/360         |
| R01_cb1827_c1/f1p0/3991          | NA                       | R01_cb1827_c1/f1p0/3991          | R01_cb1827_c1/f1p0/3991          | NA                               |
| R01_cb2033_c13/f1p0/2928         | NA                       | NA                               | R01_cb2033_c13/f1p0/2928         | R01_cb2033_c13/f1p0/2928         |
| R01_cb2851_c12/f1p0/2159         | NA                       | NA                               | NA                               | R01_cb2851_c12/f1p0/2159         |
| R01_cb8564_c125339/f1p1/264<br>5 | NA                       | R01_cb8564_c125339/f1p1/264<br>5 | NA                               | NA                               |
| R01_cb18727_c0/f1p0/5051         | NA                       | NA                               | NA                               | R01_cb18727_c0/f1p0/5051         |
| R01_cb18456_c7314/f1p0/887       | NA                       | NA                               | R01_cb18456_c7314/f1p0/887       | R01_cb18456_c7314/f1p0/887       |
| R01_cb8564_c71990/f1p0/2407      | NA                       | R01_cb8564_c71990/f1p0/2407      | NA                               | NA                               |
| R01_cb2204_c4/f1p0/3794          | R01_cb2204_c4/f1p0/3794  | R01_cb2204_c4/f1p0/3794          | R01_cb2204_c4/f1p0/3794          | R01_cb2204_c4/f1p0/3794          |
| R01_cb1178_c29/f1p0/1155         | NA                       | NA                               | NA                               | R01_cb1178_c29/f1p0/1155         |
| R01_cb15207_c115/f1p4/1059       | NA                       | R01_cb15207_c115/f1p4/1059       | NA                               | NA                               |
| R01_cb12634_c2/f1p0/4959         | NA                       | R01_cb12634_c2/f1p0/4959         | NA                               | NA                               |
| R01_cb3219_c0/f2p0/629           | NA                       | NA                               | NA                               | R01_cb3219_c0/f2p0/629           |
| R01_cb18739_c1/f1p0/2916         | NA                       | R01_cb18739_c1/f1p0/2916         | R01_cb18739_c1/f1p0/2916         | R01_cb18739_c1/f1p0/2916         |
| R01_cb8786_c0/f4p0/2072          | NA                       | NA                               | NA                               | R01_cb8786_c0/f4p0/2072          |
| R01_cb9552_c3/f1p0/2100          | NA                       | NA                               | NA                               | R01_cb9552_c3/f1p0/2100          |
| R01_cb8564_c4737/f1p0/2587       | NA                       | R01_cb8564_c4737/f1p0/2587       | NA                               | R01_cb8564_c4737/f1p0/2587       |
| R01_cb10107_c2/f1p0/1456         | NA                       | NA                               | NA                               | R01_cb10107_c2/f1p0/1456         |

|                             |                             |                             |                             |                             |
|-----------------------------|-----------------------------|-----------------------------|-----------------------------|-----------------------------|
| R01_cb8564_c73405/flp0/3260 | NA                          | R01_cb8564_c73405/flp0/3260 | R01_cb8564_c73405/flp0/3260 | R01_cb8564_c73405/flp0/3260 |
| R01_cb16888_c2/flp0/984     | NA                          | NA                          | R01_cb16888_c2/flp0/984     | R01_cb16888_c2/flp0/984     |
| R01_cb8564_c83831/flp0/4086 | NA                          | R01_cb8564_c83831/flp0/4086 | NA                          | NA                          |
| R01_cb11295_c1/flp0/2991    | R01_cb11295_c1/flp0/2991    | R01_cb11295_c1/flp0/2991    | R01_cb11295_c1/flp0/2991    | R01_cb11295_c1/flp0/2991    |
| R01_cb6682_c11/flp0/671     | NA                          | R01_cb6682_c11/flp0/671     | NA                          | R01_cb6682_c11/flp0/671     |
| R01_cb8975_c2/f3p0/2010     | NA                          | NA                          | NA                          | R01_cb8975_c2/f3p0/2010     |
| R01_cb1378_c13/flp0/682     | NA                          | R01_cb1378_c13/flp0/682     | R01_cb1378_c13/flp0/682     | R01_cb1378_c13/flp0/682     |
| R01_cb8564_c13232/flp0/3746 | R01_cb8564_c13232/flp0/3746 | R01_cb8564_c13232/flp0/3746 | R01_cb8564_c13232/flp0/3746 | R01_cb8564_c13232/flp0/3746 |
| R01_cb8380_c1/flp0/2382     | R01_cb8380_c1/flp0/2382     | NA                          | NA                          | NA                          |
| R01_cb18147_c0/flp0/412     | R01_cb18147_c0/flp0/412     | R01_cb18147_c0/flp0/412     | R01_cb18147_c0/flp0/412     | R01_cb18147_c0/flp0/412     |
| R01_cb8564_c24544/f3p2/3517 | NA                          | NA                          | NA                          | R01_cb8564_c24544/f3p2/3517 |
| R01_cb4944_c3/flp1/3219     | NA                          | R01_cb4944_c3/flp1/3219     | NA                          | NA                          |
| R01_cb1435_c6/flp0/1800     | NA                          | NA                          | NA                          | R01_cb1435_c6/flp0/1800     |
| R01_cb5927_c5/flp0/3187     | NA                          | R01_cb5927_c5/flp0/3187     | NA                          | NA                          |
| R01_cb8564_c794/f2p1/3802   | NA                          | R01_cb8564_c794/f2p1/3802   | R01_cb8564_c794/f2p1/3802   | R01_cb8564_c794/f2p1/3802   |
| R01_cb6033_c1/flp0/2556     | NA                          | NA                          | NA                          | R01_cb6033_c1/flp0/2556     |
| R01_cb15485_c0/flp0/1744    | NA                          | NA                          | NA                          | R01_cb15485_c0/flp0/1744    |
| R01_cb18645_c0/flp0/5162    | NA                          | R01_cb18645_c0/flp0/5162    | R01_cb18645_c0/flp0/5162    | R01_cb18645_c0/flp0/5162    |
| R01_cb18456_c7976/flp0/1559 | NA                          | NA                          | NA                          | R01_cb18456_c7976/flp0/1559 |
| R01_cb17248_c1/flp0/378     | R01_cb17248_c1/flp0/378     | R01_cb17248_c1/flp0/378     | R01_cb17248_c1/flp0/378     | R01_cb17248_c1/flp0/378     |
| R01_cb13501_c8/flp0/484     | NA                          | R01_cb13501_c8/flp0/484     | NA                          | NA                          |
| R01_cb7946_c0/f2p0/2481     | NA                          | R01_cb7946_c0/f2p0/2481     | R01_cb7946_c0/f2p0/2481     | NA                          |
| R01_cb5896_c44/flp0/2069    | R01_cb5896_c44/flp0/2069    | R01_cb5896_c44/flp0/2069    | NA                          | R01_cb5896_c44/flp0/2069    |
| R01_cb11476_c2/flp0/1732    | NA                          | R01_cb11476_c2/flp0/1732    | R01_cb11476_c2/flp0/1732    | R01_cb11476_c2/flp0/1732    |
| R01_cb6004_c2/flp1/2023     | NA                          | NA                          | NA                          | R01_cb6004_c2/flp1/2023     |

|                             |                           |                             |                             |                             |
|-----------------------------|---------------------------|-----------------------------|-----------------------------|-----------------------------|
| R01_cb6258_c7/f2p1/2564     | NA                        | NA                          | NA                          | R01_cb6258_c7/f2p1/2564     |
| R01_cb6491_c1/f1p0/2843     | NA                        | R01_cb6491_c1/f1p0/2843     | NA                          | R01_cb6491_c1/f1p0/2843     |
| R01_cb16867_c3/f1p0/1296    | NA                        | R01_cb16867_c3/f1p0/1296    | NA                          | R01_cb16867_c3/f1p0/1296    |
| R01_cb3138_c0/f3p0/717      | NA                        | NA                          | NA                          | R01_cb3138_c0/f3p0/717      |
| R01_cb8564_c81920/f1p1/3054 | NA                        | R01_cb8564_c81920/f1p1/3054 | NA                          | R01_cb8564_c81920/f1p1/3054 |
| R01_cb17374_c1/f3p1/768     | NA                        | NA                          | NA                          | R01_cb17374_c1/f3p1/768     |
| R01_cb8564_c41826/f1p0/2225 | NA                        | R01_cb8564_c41826/f1p0/2225 | NA                          | R01_cb8564_c41826/f1p0/2225 |
| R01_cb4422_c0/f1p0/3347     | NA                        | R01_cb4422_c0/f1p0/3347     | NA                          | R01_cb4422_c0/f1p0/3347     |
| R01_cb8564_c70521/f2p1/2089 | NA                        | R01_cb8564_c70521/f2p1/2089 | R01_cb8564_c70521/f2p1/2089 | R01_cb8564_c70521/f2p1/2089 |
| R01_cb15345_c8/f1p0/951     | NA                        | R01_cb15345_c8/f1p0/951     | NA                          | R01_cb15345_c8/f1p0/951     |
| R01_cb14542_c3/f1p0/961     | NA                        | NA                          | NA                          | R01_cb14542_c3/f1p0/961     |
| R01_cb2352_c9/f1p0/2081     | R01_cb2352_c9/f1p0/2081   | R01_cb2352_c9/f1p0/2081     | R01_cb2352_c9/f1p0/2081     | R01_cb2352_c9/f1p0/2081     |
| R01_cb8564_c501/f6p0/2535   | R01_cb8564_c501/f6p0/2535 | R01_cb8564_c501/f6p0/2535   | R01_cb8564_c501/f6p0/2535   | R01_cb8564_c501/f6p0/2535   |
| R01_cb1300_c0/f1p0/4386     | NA                        | R01_cb1300_c0/f1p0/4386     | NA                          | NA                          |
| R01_cb1279_c84/f1p0/2814    | R01_cb1279_c84/f1p0/2814  | R01_cb1279_c84/f1p0/2814    | R01_cb1279_c84/f1p0/2814    | R01_cb1279_c84/f1p0/2814    |
| R01_cb2002_c0/f2p0/561      | R01_cb2002_c0/f2p0/561    | R01_cb2002_c0/f2p0/561      | NA                          | NA                          |
| R01_cb10766_c2/f1p0/2637    | NA                        | R01_cb10766_c2/f1p0/2637    | NA                          | NA                          |
| R01_cb6501_c2/f1p1/2316     | NA                        | R01_cb6501_c2/f1p1/2316     | NA                          | NA                          |
| R01_cb2710_c7/f1p0/3633     | R01_cb2710_c7/f1p0/3633   | R01_cb2710_c7/f1p0/3633     | R01_cb2710_c7/f1p0/3633     | R01_cb2710_c7/f1p0/3633     |
| R01_cb7489_c2/f1p0/2148     | NA                        | R01_cb7489_c2/f1p0/2148     | NA                          | NA                          |
| R01_cb14757_c7/f1p0/1772    | NA                        | R01_cb14757_c7/f1p0/1772    | NA                          | NA                          |
| R01_cb15105_c4/f1p0/645     | NA                        | R01_cb15105_c4/f1p0/645     | NA                          | NA                          |
| R01_cb2156_c45/f1p0/2503    | NA                        | R01_cb2156_c45/f1p0/2503    | NA                          | NA                          |
| R01_cb16052_c17/f1p0/869    | NA                        | R01_cb16052_c17/f1p0/869    | R01_cb16052_c17/f1p0/869    | NA                          |
| R01_cb8564_c126699/f1p0/208 | NA                        | R01_cb8564_c126699/f1p0/208 | NA                          | NA                          |
| 6                           |                           | 6                           |                             |                             |

|                                  |                                   |                                  |                                  |                                  |
|----------------------------------|-----------------------------------|----------------------------------|----------------------------------|----------------------------------|
| R01_cb15094_c0/flp0/1056         | NA                                | NA                               | NA                               | R01_cb15094_c0/flp0/1056         |
| R01_cb4295_c8/flp0/3379          | R01_cb4295_c8/flp0/3379           | R01_cb4295_c8/flp0/3379          | NA                               | NA                               |
| R01_cb10674_c0/f8p1/391          | NA                                | R01_cb10674_c0/f8p1/391          | NA                               | R01_cb10674_c0/f8p1/391          |
| R01_cb8198_c2/flp0/2433          | NA                                | NA                               | NA                               | R01_cb8198_c2/flp0/2433          |
| R01_cb8564_c132693/f2p4/330<br>4 | NA                                | R01_cb8564_c132693/f2p4/330<br>4 | NA                               | R01_cb8564_c132693/f2p4/330<br>4 |
| R01_cb18590_c1/flp0/1096         | NA                                | R01_cb18590_c1/flp0/1096         | NA                               | R01_cb18590_c1/flp0/1096         |
| R01_cb8126_c5/flp0/806           | R01_cb8126_c5/flp0/806            | R01_cb8126_c5/flp0/806           | NA                               | NA                               |
| R01_cb8564_c121605/flp0/273<br>6 | R01_cb8564_c121605/flp0/273<br>36 | R01_cb8564_c121605/flp0/273<br>6 | R01_cb8564_c121605/flp0/273<br>6 | R01_cb8564_c121605/flp0/273<br>6 |
| R01_cb8564_c130347/flp1/227<br>7 | NA                                | R01_cb8564_c130347/flp1/227<br>7 | NA                               | R01_cb8564_c130347/flp1/227<br>7 |
| R01_cb3382_c2/flp0/3382          | NA                                | R01_cb3382_c2/flp0/3382          | NA                               | NA                               |
| R01_cb14307_c2/flp0/1253         | NA                                | R01_cb14307_c2/flp0/1253         | NA                               | NA                               |
| R01_cb16118_c5/flp0/766          | NA                                | R01_cb16118_c5/flp0/766          | R01_cb16118_c5/flp0/766          | R01_cb16118_c5/flp0/766          |
| R01_cb6024_c5/flp0/2279          | NA                                | NA                               | NA                               | R01_cb6024_c5/flp0/2279          |
| R01_cb15832_c0/f2p0/1001         | NA                                | R01_cb15832_c0/f2p0/1001         | NA                               | R01_cb15832_c0/f2p0/1001         |
| R01_cb18456_c6112/flp0/829       | NA                                | NA                               | NA                               | R01_cb18456_c6112/flp0/829       |
| R01_cb18073_c1/flp0/529          | R01_cb18073_c1/flp0/529           | R01_cb18073_c1/flp0/529          | R01_cb18073_c1/flp0/529          | R01_cb18073_c1/flp0/529          |
| R01_cb17430_c0/flp0/1151         | R01_cb17430_c0/flp0/1151          | R01_cb17430_c0/flp0/1151         | R01_cb17430_c0/flp0/1151         | R01_cb17430_c0/flp0/1151         |
| R01_cb7265_c4/flp0/2467          | NA                                | R01_cb7265_c4/flp0/2467          | NA                               | NA                               |
| R01_cb8564_c72331/flp0/3536      | NA                                | R01_cb8564_c72331/flp0/3536      | NA                               | R01_cb8564_c72331/flp0/3536      |
| R01_cb260_c16/flp0/4789          | NA                                | NA                               | NA                               | R01_cb260_c16/flp0/4789          |
| R01_cb7741_c11/flp0/465          | R01_cb7741_c11/flp0/465           | R01_cb7741_c11/flp0/465          | R01_cb7741_c11/flp0/465          | R01_cb7741_c11/flp0/465          |
| R01_cb17921_c0/f2p0/694          | NA                                | R01_cb17921_c0/f2p0/694          | NA                               | NA                               |
| R01_cb4707_c3/flp0/2710          | NA                                | NA                               | NA                               | R01_cb4707_c3/flp0/2710          |

|                              |                             |                              |                             |                              |
|------------------------------|-----------------------------|------------------------------|-----------------------------|------------------------------|
| R01_cb18132_c5/flp0/1551     | NA                          | R01_cb18132_c5/flp0/1551     | NA                          | NA                           |
| R01_cb16376_c3/flp2/763      | NA                          | R01_cb16376_c3/flp2/763      | NA                          | NA                           |
| R01_cb17982_c0/flp0/1159     | NA                          | NA                           | NA                          | R01_cb17982_c0/flp0/1159     |
| R01_cb5622_c8/flp0/1579      | NA                          | NA                           | NA                          | R01_cb5622_c8/flp0/1579      |
| R01_cb8564_c113662/flp0/2289 | NA                          | NA                           | NA                          | R01_cb8564_c113662/flp0/2289 |
| R01_cb8564_c48321/flp0/3936  | R01_cb8564_c48321/flp0/3936 | R01_cb8564_c48321/flp0/3936  | R01_cb8564_c48321/flp0/3936 | R01_cb8564_c48321/flp0/3936  |
| R01_cb5114_c0/flp0/3173      | R01_cb5114_c0/flp0/3173     | R01_cb5114_c0/flp0/3173      | R01_cb5114_c0/flp0/3173     | NA                           |
| R01_cb14091_c0/f2p0/1721     | NA                          | R01_cb14091_c0/f2p0/1721     | NA                          | R01_cb14091_c0/f2p0/1721     |
| R01_cb17715_c2/flp0/1433     | NA                          | NA                           | NA                          | R01_cb17715_c2/flp0/1433     |
| R01_cb8564_c113234/flp0/2194 | NA                          | R01_cb8564_c113234/flp0/2194 | NA                          | NA                           |
| R01_cb4744_c6/flp0/1496      | NA                          | NA                           | NA                          | R01_cb4744_c6/flp0/1496      |
| R01_cb10488_c1/flp0/2004     | R01_cb10488_c1/flp0/2004    | R01_cb10488_c1/flp0/2004     | R01_cb10488_c1/flp0/2004    | R01_cb10488_c1/flp0/2004     |
| R01_cb13396_c7/flp0/1530     | NA                          | R01_cb13396_c7/flp0/1530     | R01_cb13396_c7/flp0/1530    | R01_cb13396_c7/flp0/1530     |
| R01_cb1847_c0/f3p0/2840      | NA                          | NA                           | NA                          | R01_cb1847_c0/f3p0/2840      |
| R01_cb3618_c5/flp0/2772      | NA                          | NA                           | NA                          | R01_cb3618_c5/flp0/2772      |
| R01_cb1198_c27/flp1/1495     | NA                          | NA                           | NA                          | R01_cb1198_c27/flp1/1495     |
| R01_cb6236_c1/flp0/2908      | NA                          | NA                           | NA                          | R01_cb6236_c1/flp0/2908      |
| R01_cb454_c28/flp0/3850      | NA                          | R01_cb454_c28/flp0/3850      | NA                          | R01_cb454_c28/flp0/3850      |
| R01_cb13178_c8/f2p1/584      | NA                          | R01_cb13178_c8/f2p1/584      | NA                          | NA                           |
| R01_cb18836_c0/flp0/5394     | NA                          | NA                           | NA                          | R01_cb18836_c0/flp0/5394     |
| R01_cb8084_c10/f6p1/2469     | NA                          | NA                           | NA                          | R01_cb8084_c10/f6p1/2469     |
| R01_cb8863_c4/flp0/2019      | R01_cb8863_c4/flp0/2019     | R01_cb8863_c4/flp0/2019      | NA                          | NA                           |
| R01_cb10314_c3/flp0/3223     | NA                          | R01_cb10314_c3/flp0/3223     | R01_cb10314_c3/flp0/3223    | R01_cb10314_c3/flp0/3223     |

|                             |                            |                             |                             |                             |
|-----------------------------|----------------------------|-----------------------------|-----------------------------|-----------------------------|
| R01_cb9529_c1/f2p0/947      | NA                         | NA                          | NA                          | R01_cb9529_c1/f2p0/947      |
| R01_cb16341_c2/f1p0/545     | R01_cb16341_c2/f1p0/545    | R01_cb16341_c2/f1p0/545     | R01_cb16341_c2/f1p0/545     | R01_cb16341_c2/f1p0/545     |
| R01_cb10096_c4/f1p0/2125    | R01_cb10096_c4/f1p0/2125   | R01_cb10096_c4/f1p0/2125    | NA                          | R01_cb10096_c4/f1p0/2125    |
| R01_cb13545_c30/f1p1/553    | NA                         | R01_cb13545_c30/f1p1/553    | NA                          | R01_cb13545_c30/f1p1/553    |
| R01_cb10906_c0/f1p0/1657    | NA                         | NA                          | NA                          | R01_cb10906_c0/f1p0/1657    |
| R01_cb69_c23/f1p0/3553      | NA                         | NA                          | NA                          | R01_cb69_c23/f1p0/3553      |
| R01_cb10034_c58/f1p3/1621   | NA                         | R01_cb10034_c58/f1p3/1621   | NA                          | NA                          |
| R01_cb17811_c0/f3p0/673     | R01_cb17811_c0/f3p0/673    | NA                          | NA                          | R01_cb17811_c0/f3p0/673     |
| R01_cb1497_c6/f1p0/2701     | NA                         | NA                          | NA                          | R01_cb1497_c6/f1p0/2701     |
| R01_cb3426_c24/f1p0/2863    | NA                         | NA                          | NA                          | R01_cb3426_c24/f1p0/2863    |
| R01_cb5054_c1/f1p0/3564     | NA                         | R01_cb5054_c1/f1p0/3564     | NA                          | NA                          |
| R01_cb5417_c3/f1p0/3252     | NA                         | NA                          | NA                          | R01_cb5417_c3/f1p0/3252     |
| R01_cb8564_c89748/f3p1/2815 | NA                         | R01_cb8564_c89748/f3p1/2815 | NA                          | R01_cb8564_c89748/f3p1/2815 |
| R01_cb16412_c3/f1p0/1754    | NA                         | R01_cb16412_c3/f1p0/1754    | NA                          | NA                          |
| R01_cb261_c27/f1p0/2445     | NA                         | NA                          | NA                          | R01_cb261_c27/f1p0/2445     |
| R01_cb18400_c1/f1p0/1781    | NA                         | NA                          | NA                          | R01_cb18400_c1/f1p0/1781    |
| R01_cb8564_c22325/f3p0/3387 | NA                         | NA                          | NA                          | R01_cb8564_c22325/f3p0/3387 |
| R01_cb4580_c2/f1p0/4527     | NA                         | NA                          | NA                          | R01_cb4580_c2/f1p0/4527     |
| R01_cb2161_c2/f2p0/3620     | NA                         | NA                          | NA                          | R01_cb2161_c2/f2p0/3620     |
| R01_cb8564_c72401/f1p0/4486 | NA                         | R01_cb8564_c72401/f1p0/4486 | NA                          | NA                          |
| R01_cb18456_c2299/f1p0/432  | R01_cb18456_c2299/f1p0/432 | R01_cb18456_c2299/f1p0/432  | R01_cb18456_c2299/f1p0/432  | NA                          |
| R01_cb14433_c1/f1p0/1516    | NA                         | NA                          | NA                          | R01_cb14433_c1/f1p0/1516    |
| R01_cb1568_c4/f1p0/3080     | NA                         | NA                          | NA                          | R01_cb1568_c4/f1p0/3080     |
| R01_cb11630_c0/f1p0/1176    | NA                         | R01_cb11630_c0/f1p0/1176    | R01_cb11630_c0/f1p0/1176    | R01_cb11630_c0/f1p0/1176    |
| R01_cb12830_c1/f6p0/519     | R01_cb12830_c1/f6p0/519    | NA                          | NA                          | NA                          |
| R01_cb8564_c19304/f1p0/4013 | NA                         | R01_cb8564_c19304/f1p0/4013 | R01_cb8564_c19304/f1p0/4013 | R01_cb8564_c19304/f1p0/4013 |

|                                  |                         |                             |                                  |                                  |
|----------------------------------|-------------------------|-----------------------------|----------------------------------|----------------------------------|
| R01_cb8564_c145739/f4p0/245<br>6 | NA                      | NA                          | R01_cb8564_c145739/f4p0/245<br>6 | R01_cb8564_c145739/f4p0/245<br>6 |
| R01_cb17015_c1/f1p0/987          | R01_cb17015_c1/f1p0/987 | R01_cb17015_c1/f1p0/987     | R01_cb17015_c1/f1p0/987          | R01_cb17015_c1/f1p0/987          |
| R01_cb16984_c3/f1p0/1010         | NA                      | R01_cb16984_c3/f1p0/1010    | NA                               | R01_cb16984_c3/f1p0/1010         |
| R01_cb6197_c0/f2p0/2919          | NA                      | R01_cb6197_c0/f2p0/2919     | NA                               | NA                               |
| R01_cb9157_c7/f1p0/1802          | NA                      | NA                          | NA                               | R01_cb9157_c7/f1p0/1802          |
| R01_cb226_c3/f1p0/2740           | NA                      | NA                          | NA                               | R01_cb226_c3/f1p0/2740           |
| R01_cb8564_c89003/f1p0/2479      | NA                      | NA                          | NA                               | R01_cb8564_c89003/f1p0/2479      |
| R01_cb12240_c6/f1p1/688          | R01_cb12240_c6/f1p1/688 | R01_cb12240_c6/f1p1/688     | NA                               | NA                               |
| R01_cb15009_c2/f1p0/777          | NA                      | R01_cb15009_c2/f1p0/777     | NA                               | NA                               |
| R01_cb8564_c35300/f1p2/3912      | NA                      | NA                          | NA                               | R01_cb8564_c35300/f1p2/3912      |
| R01_cb15861_c1/f1p0/1155         | NA                      | NA                          | NA                               | R01_cb15861_c1/f1p0/1155         |
| R01_cb13566_c4/f1p0/765          | NA                      | R01_cb13566_c4/f1p0/765     | NA                               | NA                               |
| R01_cb8564_c16862/f1p0/2896      | NA                      | R01_cb8564_c16862/f1p0/2896 | R01_cb8564_c16862/f1p0/2896      | R01_cb8564_c16862/f1p0/2896      |
| R01_cb1135_c3/f1p0/2050          | NA                      | R01_cb1135_c3/f1p0/2050     | NA                               | NA                               |
| R01_cb5165_c3/f1p0/1980          | NA                      | R01_cb5165_c3/f1p0/1980     | NA                               | NA                               |
| R01_cb17230_c0/f4p0/629          | NA                      | NA                          | NA                               | R01_cb17230_c0/f4p0/629          |
| R01_cb14465_c3/f1p0/696          | NA                      | R01_cb14465_c3/f1p0/696     | R01_cb14465_c3/f1p0/696          | R01_cb14465_c3/f1p0/696          |
| R01_cb15334_c0/f2p0/414          | R01_cb15334_c0/f2p0/414 | R01_cb15334_c0/f2p0/414     | R01_cb15334_c0/f2p0/414          | R01_cb15334_c0/f2p0/414          |
| R01_cb8512_c2/f1p0/2321          | NA                      | R01_cb8512_c2/f1p0/2321     | NA                               | NA                               |
| R01_cb16118_c4/f1p0/1198         | NA                      | NA                          | NA                               | R01_cb16118_c4/f1p0/1198         |
| R01_cb781_c0/f1p1/1956           | NA                      | NA                          | NA                               | R01_cb781_c0/f1p1/1956           |
| R01_cb9155_c2/f1p0/2259          | NA                      | R01_cb9155_c2/f1p0/2259     | NA                               | NA                               |
| R01_cb5440_c12/f1p0/470          | R01_cb5440_c12/f1p0/470 | R01_cb5440_c12/f1p0/470     | R01_cb5440_c12/f1p0/470          | R01_cb5440_c12/f1p0/470          |
| R01_cb10519_c5/f1p0/3036         | NA                      | R01_cb10519_c5/f1p0/3036    | NA                               | NA                               |
| R01_cb10532_c3/f1p0/544          | R01_cb10532_c3/f1p0/544 | R01_cb10532_c3/f1p0/544     | R01_cb10532_c3/f1p0/544          | R01_cb10532_c3/f1p0/544          |



|                              |                          |                              |                              |                              |
|------------------------------|--------------------------|------------------------------|------------------------------|------------------------------|
| R01_cb15745_c2/flp0/457      | R01_cb15745_c2/flp0/457  | R01_cb15745_c2/flp0/457      | R01_cb15745_c2/flp0/457      | R01_cb15745_c2/flp0/457      |
| R01_cb15701_c2/flp0/1558     | NA                       | R01_cb15701_c2/flp0/1558     | NA                           | R01_cb15701_c2/flp0/1558     |
| R01_cb10262_c9/flp0/1498     | NA                       | R01_cb10262_c9/flp0/1498     | NA                           | R01_cb10262_c9/flp0/1498     |
| R01_cb10596_c8/flp0/856      | NA                       | R01_cb10596_c8/flp0/856      | NA                           | NA                           |
| R01_cb4229_c1/flp0/3397      | NA                       | NA                           | NA                           | R01_cb4229_c1/flp0/3397      |
| R01_cb8564_c13869/flp0/3450  | NA                       | R01_cb8564_c13869/flp0/3450  | NA                           | NA                           |
| R01_cb9704_c1/flp0/2876      | NA                       | NA                           | NA                           | R01_cb9704_c1/flp0/2876      |
| R01_cb18039_c1/flp0/771      | NA                       | NA                           | R01_cb18039_c1/flp0/771      | R01_cb18039_c1/flp0/771      |
| R01_cb1939_c19/flp0/1220     | R01_cb1939_c19/flp0/1220 | R01_cb1939_c19/flp0/1220     | R01_cb1939_c19/flp0/1220     | R01_cb1939_c19/flp0/1220     |
| R01_cb8564_c123945/flp0/1938 | NA                       | R01_cb8564_c123945/flp0/1938 | R01_cb8564_c123945/flp0/1938 | R01_cb8564_c123945/flp0/1938 |
| R01_cb8564_c89494/flp0/1933  | NA                       | R01_cb8564_c89494/flp0/1933  | NA                           | NA                           |
| R01_cb8564_c125031/flp0/2554 | NA                       | NA                           | NA                           | R01_cb8564_c125031/flp0/2554 |
| R01_cb7491_c3/flp0/1223      | NA                       | NA                           | NA                           | R01_cb7491_c3/flp0/1223      |
| R01_cb4676_c0/f2p1/2636      | NA                       | NA                           | NA                           | R01_cb4676_c0/f2p1/2636      |
| R01_cb525_c5/flp0/2035       | NA                       | NA                           | NA                           | R01_cb525_c5/flp0/2035       |
| R01_cb10022_c3/flp0/1013     | NA                       | R01_cb10022_c3/flp0/1013     | NA                           | NA                           |
| R01_cb8564_c4474/flp0/2973   | NA                       | R01_cb8564_c4474/flp0/2973   | NA                           | NA                           |
| R01_cb13289_c1/f6p2/1789     | NA                       | R01_cb13289_c1/f6p2/1789     | R01_cb13289_c1/f6p2/1789     | NA                           |
| R01_cb2451_c22/flp2/3339     | NA                       | NA                           | NA                           | R01_cb2451_c22/flp2/3339     |
| R01_cb5386_c73/flp0/1424     | NA                       | R01_cb5386_c73/flp0/1424     | NA                           | R01_cb5386_c73/flp0/1424     |
| R01_cb15945_c0/f2p0/462      | R01_cb15945_c0/f2p0/462  | NA                           | NA                           | R01_cb15945_c0/f2p0/462      |
| R01_cb16645_c41/flp0/1182    | NA                       | R01_cb16645_c41/flp0/1182    | NA                           | R01_cb16645_c41/flp0/1182    |
| R01_cb3622_c9/flp0/2510      | NA                       | R01_cb3622_c9/flp0/2510      | NA                           | NA                           |
| R01_cb18456_c5306/flp3/796   | NA                       | R01_cb18456_c5306/flp3/796   | NA                           | NA                           |

|                              |                          |                             |                          |                              |
|------------------------------|--------------------------|-----------------------------|--------------------------|------------------------------|
| R01_cb6586_c1/flp0/2064      | NA                       | R01_cb6586_c1/flp0/2064     | NA                       | NA                           |
| R01_cb11828_c1/flp0/2017     | NA                       | R01_cb11828_c1/flp0/2017    | R01_cb11828_c1/flp0/2017 | NA                           |
| R01_cb12521_c2/flp0/1283     | NA                       | NA                          | NA                       | R01_cb12521_c2/flp0/1283     |
| R01_cb6737_c11/flp0/3297     | R01_cb6737_c11/flp0/3297 | R01_cb6737_c11/flp0/3297    | R01_cb6737_c11/flp0/3297 | R01_cb6737_c11/flp0/3297     |
| R01_cb10639_c1/flp0/1983     | NA                       | R01_cb10639_c1/flp0/1983    | R01_cb10639_c1/flp0/1983 | R01_cb10639_c1/flp0/1983     |
| R01_cb8978_c0/f3p0/706       | NA                       | R01_cb8978_c0/f3p0/706      | NA                       | NA                           |
| R01_cb13602_c26/flp0/1802    | NA                       | NA                          | NA                       | R01_cb13602_c26/flp0/1802    |
| R01_cb3618_c11/flp0/2951     | NA                       | NA                          | NA                       | R01_cb3618_c11/flp0/2951     |
| R01_cb11686_c0/flp0/1232     | NA                       | NA                          | NA                       | R01_cb11686_c0/flp0/1232     |
| R01_cb720_c4/flp0/2836       | NA                       | R01_cb720_c4/flp0/2836      | NA                       | NA                           |
| R01_cb9598_c11/f2p0/1690     | NA                       | R01_cb9598_c11/f2p0/1690    | NA                       | NA                           |
| R01_cb8564_c150564/flp2/1934 | NA                       | NA                          | NA                       | R01_cb8564_c150564/flp2/1934 |
| R01_cb17975_c1/flp0/1057     | NA                       | NA                          | NA                       | R01_cb17975_c1/flp0/1057     |
| R01_cb14610_c0/f3p0/702      | NA                       | R01_cb14610_c0/f3p0/702     | R01_cb14610_c0/f3p0/702  | R01_cb14610_c0/f3p0/702      |
| R01_cb8564_c40218/flp0/3146  | NA                       | R01_cb8564_c40218/flp0/3146 | NA                       | NA                           |
| R01_cb16990_c6/flp0/1760     | NA                       | NA                          | NA                       | R01_cb16990_c6/flp0/1760     |
| R01_cb10877_c1/flp0/4278     | NA                       | R01_cb10877_c1/flp0/4278    | NA                       | NA                           |
| R01_cb8564_c84897/flp1/3769  | NA                       | NA                          | NA                       | R01_cb8564_c84897/flp1/3769  |
| R01_cb618_c7/flp0/4514       | NA                       | NA                          | NA                       | R01_cb618_c7/flp0/4514       |
| R01_cb13613_c0/f2p0/1532     | NA                       | R01_cb13613_c0/f2p0/1532    | NA                       | R01_cb13613_c0/f2p0/1532     |
| R01_cb3596_c1/flp0/2163      | NA                       | NA                          | NA                       | R01_cb3596_c1/flp0/2163      |
| R01_cb18456_c3358/flp0/1132  | NA                       | R01_cb18456_c3358/flp0/1132 | NA                       | NA                           |
| R01_cb11429_c2/flp0/2387     | NA                       | R01_cb11429_c2/flp0/2387    | NA                       | R01_cb11429_c2/flp0/2387     |
| R01_cb1819_c3/flp0/2470      | NA                       | R01_cb1819_c3/flp0/2470     | R01_cb1819_c3/flp0/2470  | NA                           |
| R01_cb8564_c17754/flp0/2925  | NA                       | R01_cb8564_c17754/flp0/2925 | NA                       | NA                           |

|                              |                             |                              |                             |                              |
|------------------------------|-----------------------------|------------------------------|-----------------------------|------------------------------|
| R01_cb18456_c4741/f1p2/497   | NA                          | NA                           | NA                          | R01_cb18456_c4741/f1p2/497   |
| R01_cb6499_c16/f1p0/2036     | NA                          | R01_cb6499_c16/f1p0/2036     | NA                          | NA                           |
| R01_cb5682_c9/f1p0/940       | R01_cb5682_c9/f1p0/940      | R01_cb5682_c9/f1p0/940       | NA                          | NA                           |
| R01_cb4128_c21/f1p0/3017     | NA                          | NA                           | NA                          | R01_cb4128_c21/f1p0/3017     |
| R01_cb10086_c4/f1p0/2322     | NA                          | NA                           | NA                          | R01_cb10086_c4/f1p0/2322     |
| R01_cb2161_c10/f1p0/3620     | NA                          | NA                           | NA                          | R01_cb2161_c10/f1p0/3620     |
| R01_cb18456_c1798/f1p1/1438  | NA                          | R01_cb18456_c1798/f1p1/1438  | NA                          | NA                           |
| R01_cb8564_c128182/f1p0/2570 | NA                          | R01_cb8564_c128182/f1p0/2570 | NA                          | NA                           |
| R01_cb14723_c0/f3p0/1104     | NA                          | NA                           | NA                          | R01_cb14723_c0/f3p0/1104     |
| R01_cb17918_c4/f1p0/1546     | NA                          | NA                           | NA                          | R01_cb17918_c4/f1p0/1546     |
| R01_cb4900_c21/f1p0/2508     | NA                          | NA                           | NA                          | R01_cb4900_c21/f1p0/2508     |
| R01_cb2352_c24/f1p0/5226     | NA                          | NA                           | R01_cb2352_c24/f1p0/5226    | R01_cb2352_c24/f1p0/5226     |
| R01_cb16834_c0/f1p0/597      | NA                          | R01_cb16834_c0/f1p0/597      | NA                          | R01_cb16834_c0/f1p0/597      |
| R01_cb8328_c1/f1p0/2492      | R01_cb8328_c1/f1p0/2492     | NA                           | NA                          | NA                           |
| R01_cb10594_c0/f6p0/1247     | NA                          | NA                           | NA                          | R01_cb10594_c0/f6p0/1247     |
| R01_cb3527_c19/f1p0/2224     | NA                          | R01_cb3527_c19/f1p0/2224     | NA                          | NA                           |
| R01_cb8564_c127167/f1p0/2148 | NA                          | NA                           | NA                          | R01_cb8564_c127167/f1p0/2148 |
| R01_cb6720_c5/f1p0/505       | R01_cb6720_c5/f1p0/505      | R01_cb6720_c5/f1p0/505       | R01_cb6720_c5/f1p0/505      | R01_cb6720_c5/f1p0/505       |
| R01_cb8564_c19566/f1p0/2152  | NA                          | R01_cb8564_c19566/f1p0/2152  | R01_cb8564_c19566/f1p0/2152 | R01_cb8564_c19566/f1p0/2152  |
| R01_cb15535_c10/f1p5/804     | NA                          | R01_cb15535_c10/f1p5/804     | NA                          | R01_cb15535_c10/f1p5/804     |
| R01_cb390_c9/f1p0/3130       | NA                          | R01_cb390_c9/f1p0/3130       | NA                          | NA                           |
| R01_cb8564_c38338/f1p0/2889  | R01_cb8564_c38338/f1p0/2889 | R01_cb8564_c38338/f1p0/2889  | R01_cb8564_c38338/f1p0/2889 | R01_cb8564_c38338/f1p0/2889  |
| R01_cb10521_c15/f1p0/460     | NA                          | R01_cb10521_c15/f1p0/460     | NA                          | R01_cb10521_c15/f1p0/460     |

|                                  |                                 |                                  |                                  |                                  |
|----------------------------------|---------------------------------|----------------------------------|----------------------------------|----------------------------------|
| R01_cb14613_c1/flp2/715          | NA                              | NA                               | NA                               | R01_cb14613_c1/flp2/715          |
| R01_cb8564_c83678/flp0/1927      | NA                              | R01_cb8564_c83678/flp0/1927      | R01_cb8564_c83678/flp0/1927      | R01_cb8564_c83678/flp0/1927      |
| R01_cb2884_c3/flp0/1955          | NA                              | NA                               | NA                               | R01_cb2884_c3/flp0/1955          |
| R01_cb14987_c0/f3p0/614          | R01_cb14987_c0/f3p0/614         | R01_cb14987_c0/f3p0/614          | R01_cb14987_c0/f3p0/614          | R01_cb14987_c0/f3p0/614          |
| R01_cb17453_c1/flp0/1003         | NA                              | NA                               | R01_cb17453_c1/flp0/1003         | R01_cb17453_c1/flp0/1003         |
| R01_cb8564_c17412/flp0/2278      | NA                              | NA                               | NA                               | R01_cb8564_c17412/flp0/2278      |
| R01_cb17672_c21/flp0/517         | R01_cb17672_c21/flp0/517        | R01_cb17672_c21/flp0/517         | R01_cb17672_c21/flp0/517         | R01_cb17672_c21/flp0/517         |
| R01_cb3667_c4/flp1/2784          | NA                              | NA                               | NA                               | R01_cb3667_c4/flp1/2784          |
| R01_cb9305_c5/flp1/2699          | NA                              | R01_cb9305_c5/flp1/2699          | NA                               | NA                               |
| R01_cb6551_c2/flp0/2632          | NA                              | R01_cb6551_c2/flp0/2632          | NA                               | NA                               |
| R01_cb9365_c5/flp0/1795          | NA                              | NA                               | NA                               | R01_cb9365_c5/flp0/1795          |
| R01_cb8564_c79100/flp0/2453      | NA                              | NA                               | NA                               | R01_cb8564_c79100/flp0/2453      |
| R01_cb8564_c111189/flp0/307<br>2 | NA                              | R01_cb8564_c111189/flp0/307<br>2 | NA                               | NA                               |
| R01_cb8564_c129815/flp0/290<br>4 | NA                              | NA                               | R01_cb8564_c129815/flp0/290<br>4 | R01_cb8564_c129815/flp0/290<br>4 |
| R01_cb15682_c4/flp0/775          | NA                              | NA                               | NA                               | R01_cb15682_c4/flp0/775          |
| R01_cb8564_c82681/flp1/3061      | NA                              | NA                               | NA                               | R01_cb8564_c82681/flp1/3061      |
| R01_cb10648_c1/flp0/483          | R01_cb10648_c1/flp0/483         | R01_cb10648_c1/flp0/483          | NA                               | R01_cb10648_c1/flp0/483          |
| R01_cb6655_c0/flp1/2797          | NA                              | R01_cb6655_c0/flp1/2797          | R01_cb6655_c0/flp1/2797          | NA                               |
| R01_cb8564_c114233/flp0/371<br>3 | NA                              | R01_cb8564_c114233/flp0/371<br>3 | NA                               | NA                               |
| R01_cb9381_c6/flp0/2060          | NA                              | R01_cb9381_c6/flp0/2060          | NA                               | NA                               |
| R01_cb124_c16/flp0/2795          | NA                              | NA                               | NA                               | R01_cb124_c16/flp0/2795          |
| R01_cb8564_c84596/flp0/2235<br>5 | R01_cb8564_c84596/flp0/223<br>5 | R01_cb8564_c84596/flp0/2235      | R01_cb8564_c84596/flp0/2235      | NA                               |

|                              |                             |                             |                             |                              |
|------------------------------|-----------------------------|-----------------------------|-----------------------------|------------------------------|
| R01_cb16274_c0/f2p0/615      | NA                          | R01_cb16274_c0/f2p0/615     | NA                          | NA                           |
| R01_cb5554_c6/flp0/2898      | R01_cb5554_c6/flp0/2898     | R01_cb5554_c6/flp0/2898     | R01_cb5554_c6/flp0/2898     | R01_cb5554_c6/flp0/2898      |
| R01_cb8564_c86556/f6p0/2422  | NA                          | R01_cb8564_c86556/f6p0/2422 | R01_cb8564_c86556/f6p0/2422 | R01_cb8564_c86556/f6p0/2422  |
| R01_cb4997_c19/flp0/1813     | NA                          | R01_cb4997_c19/flp0/1813    | R01_cb4997_c19/flp0/1813    | R01_cb4997_c19/flp0/1813     |
| R01_cb13289_c5/flp0/1757     | NA                          | NA                          | R01_cb13289_c5/flp0/1757    | NA                           |
| R01_cb8564_c2097/flp0/3145   | NA                          | R01_cb8564_c2097/flp0/3145  | R01_cb8564_c2097/flp0/3145  | NA                           |
| R01_cb14353_c3/flp0/838      | R01_cb14353_c3/flp0/838     | R01_cb14353_c3/flp0/838     | R01_cb14353_c3/flp0/838     | R01_cb14353_c3/flp0/838      |
| R01_cb8564_c87396/flp0/3094  | NA                          | R01_cb8564_c87396/flp0/3094 | NA                          | R01_cb8564_c87396/flp0/3094  |
| R01_cb7155_c11/flp0/2559     | NA                          | NA                          | NA                          | R01_cb7155_c11/flp0/2559     |
| R01_cb18452_c0/flp0/1850     | R01_cb18452_c0/flp0/1850    | R01_cb18452_c0/flp0/1850    | R01_cb18452_c0/flp0/1850    | R01_cb18452_c0/flp0/1850     |
| R01_cb8564_c2905/flp0/3126   | NA                          | R01_cb8564_c2905/flp0/3126  | NA                          | R01_cb8564_c2905/flp0/3126   |
| R01_cb8564_c13666/flp1/1994  | R01_cb8564_c13666/flp1/1994 | R01_cb8564_c13666/flp1/1994 | NA                          | R01_cb8564_c13666/flp1/1994  |
| R01_cb332_c11/flp0/5243      | NA                          | R01_cb332_c11/flp0/5243     | NA                          | NA                           |
| R01_cb7957_c0/flp0/2491      | NA                          | R01_cb7957_c0/flp0/2491     | NA                          | NA                           |
| R01_cb9562_c8/flp0/1400      | R01_cb9562_c8/flp0/1400     | R01_cb9562_c8/flp0/1400     | R01_cb9562_c8/flp0/1400     | R01_cb9562_c8/flp0/1400      |
| R01_cb15024_c3/f3p0/821      | NA                          | NA                          | NA                          | R01_cb15024_c3/f3p0/821      |
| R01_cb10913_c3/flp0/1028     | NA                          | NA                          | NA                          | R01_cb10913_c3/flp0/1028     |
| R01_cb5632_c20/flp1/2425     | NA                          | R01_cb5632_c20/flp1/2425    | NA                          | NA                           |
| R01_cb15038_c26/flp0/365     | R01_cb15038_c26/flp0/365    | R01_cb15038_c26/flp0/365    | NA                          | NA                           |
| R01_cb8564_c3684/flp0/2489   | R01_cb8564_c3684/flp0/2489  | R01_cb8564_c3684/flp0/2489  | R01_cb8564_c3684/flp0/2489  | R01_cb8564_c3684/flp0/2489   |
| R01_cb8564_c109929/flp0/2520 | NA                          | NA                          | NA                          | R01_cb8564_c109929/flp0/2520 |
| R01_cb17973_c24/flp0/867     | NA                          | R01_cb17973_c24/flp0/867    | R01_cb17973_c24/flp0/867    | NA                           |
| R01_cb14763_c0/flp0/1292     | NA                          | NA                          | NA                          | R01_cb14763_c0/flp0/1292     |
| R01_cb3224_c3/flp0/3016      | NA                          | R01_cb3224_c3/flp0/3016     | NA                          | R01_cb3224_c3/flp0/3016      |

|                                  |                            |                                  |                                  |                                  |
|----------------------------------|----------------------------|----------------------------------|----------------------------------|----------------------------------|
| R01_cb11471_c0/flp0/843          | NA                         | NA                               | R01_cb11471_c0/flp0/843          | R01_cb11471_c0/flp0/843          |
| R01_cb8564_c119036/flp0/284<br>4 | NA                         | NA                               | NA                               | R01_cb8564_c119036/flp0/284<br>4 |
| R01_cb8564_c81976/flp0/2827      | NA                         | R01_cb8564_c81976/flp0/2827      | R01_cb8564_c81976/flp0/2827      | R01_cb8564_c81976/flp0/2827      |
| R01_cb1437_c6/flp0/3928          | NA                         | NA                               | NA                               | R01_cb1437_c6/flp0/3928          |
| R01_cb8564_c107814/f3p0/212<br>3 | NA                         | R01_cb8564_c107814/f3p0/212<br>3 | R01_cb8564_c107814/f3p0/212<br>3 | R01_cb8564_c107814/f3p0/212<br>3 |
| R01_cb15462_c0/flp0/993          | R01_cb15462_c0/flp0/993    | R01_cb15462_c0/flp0/993          | R01_cb15462_c0/flp0/993          | NA                               |
| R01_cb8564_c130233/flp0/239<br>6 | NA                         | R01_cb8564_c130233/flp0/239<br>6 | R01_cb8564_c130233/flp0/239<br>6 | R01_cb8564_c130233/flp0/239<br>6 |
| R01_cb9535_c13/flp0/2492         | NA                         | R01_cb9535_c13/flp0/2492         | NA                               | R01_cb9535_c13/flp0/2492         |
| R01_cb8564_c19761/flp0/3250      | NA                         | R01_cb8564_c19761/flp0/3250      | R01_cb8564_c19761/flp0/3250      | NA                               |
| R01_cb8564_c121421/flp1/234<br>5 | NA                         | NA                               | NA                               | R01_cb8564_c121421/flp1/234<br>5 |
| R01_cb2632_c9/flp0/603           | NA                         | R01_cb2632_c9/flp0/603           | R01_cb2632_c9/flp0/603           | R01_cb2632_c9/flp0/603           |
| R01_cb11319_c0/flp0/1318         | R01_cb11319_c0/flp0/1318   | R01_cb11319_c0/flp0/1318         | R01_cb11319_c0/flp0/1318         | R01_cb11319_c0/flp0/1318         |
| R01_cb13118_c5/flp0/1644         | NA                         | R01_cb13118_c5/flp0/1644         | NA                               | R01_cb13118_c5/flp0/1644         |
| R01_cb18456_c6440/flp0/650       | R01_cb18456_c6440/flp0/650 | R01_cb18456_c6440/flp0/650       | R01_cb18456_c6440/flp0/650       | R01_cb18456_c6440/flp0/650       |
| R01_cb535_c0/flp0/4763           | NA                         | NA                               | NA                               | R01_cb535_c0/flp0/4763           |
| R01_cb8564_c4607/flp0/4078       | NA                         | R01_cb8564_c4607/flp0/4078       | NA                               | NA                               |
| R01_cb6169_c8/flp0/1219          | NA                         | R01_cb6169_c8/flp0/1219          | NA                               | R01_cb6169_c8/flp0/1219          |
| R01_cb10258_c4/flp0/1074         | R01_cb10258_c4/flp0/1074   | R01_cb10258_c4/flp0/1074         | NA                               | R01_cb10258_c4/flp0/1074         |
| R01_cb18409_c176/flp0/350        | R01_cb18409_c176/flp0/350  | NA                               | R01_cb18409_c176/flp0/350        | R01_cb18409_c176/flp0/350        |
| R01_cb119_c10/flp0/4794          | NA                         | NA                               | NA                               | R01_cb119_c10/flp0/4794          |
| R01_cb11126_c0/flp0/385          | NA                         | R01_cb11126_c0/flp0/385          | NA                               | R01_cb11126_c0/flp0/385          |
| R01_cb8564_c13129/flp0/3847      | R01_cb8564_c13129/flp0/384 | R01_cb8564_c13129/flp0/3847      | NA                               | NA                               |

|                               |                         |                             |                             |                               |
|-------------------------------|-------------------------|-----------------------------|-----------------------------|-------------------------------|
|                               | 7                       |                             |                             |                               |
| R01_cb8145_c3/flp0/2978       | NA                      | NA                          | NA                          | R01_cb8145_c3/flp0/2978       |
| R01_cb18222_c0/f2p0/439       | NA                      | NA                          | NA                          | R01_cb18222_c0/f2p0/439       |
| R01_cb3618_c2/f8p0/2786       | NA                      | NA                          | NA                          | R01_cb3618_c2/f8p0/2786       |
| R01_cb3929_c7/flp0/3311       | NA                      | R01_cb3929_c7/flp0/3311     | NA                          | NA                            |
| R01_cb2002_c4/flp0/607        | R01_cb2002_c4/flp0/607  | R01_cb2002_c4/flp0/607      | NA                          | NA                            |
| R01_cb16616_c1/flp0/605       | NA                      | NA                          | NA                          | R01_cb16616_c1/flp0/605       |
| R01_cb10945_c3/flp0/792       | NA                      | R01_cb10945_c3/flp0/792     | R01_cb10945_c3/flp0/792     | R01_cb10945_c3/flp0/792       |
| R01_cb16387_c6/flp0/1877      | NA                      | NA                          | NA                          | R01_cb16387_c6/flp0/1877      |
| R01_cb8779_c13/flp0/2714      | NA                      | R01_cb8779_c13/flp0/2714    | NA                          | R01_cb8779_c13/flp0/2714      |
| R01_cb6069_c0/f4p0/2844       | NA                      | NA                          | NA                          | R01_cb6069_c0/f4p0/2844       |
| R01_cb17488_c1/flp0/1624      | NA                      | NA                          | NA                          | R01_cb17488_c1/flp0/1624      |
| R01_cb5828_c4/flp0/2616       | NA                      | NA                          | NA                          | R01_cb5828_c4/flp0/2616       |
| R01_cb12521_c5/flp0/1338      | NA                      | NA                          | NA                          | R01_cb12521_c5/flp0/1338      |
| R01_cb4136_c1/flp0/3273       | R01_cb4136_c1/flp0/3273 | R01_cb4136_c1/flp0/3273     | R01_cb4136_c1/flp0/3273     | NA                            |
| R01_cb8564_c147236/f34p1/4140 | NA                      | NA                          | NA                          | R01_cb8564_c147236/f34p1/4140 |
| R01_cb2843_c13/flp2/2666      | NA                      | NA                          | NA                          | R01_cb2843_c13/flp2/2666      |
| R01_cb18456_c6081/flp0/729    | NA                      | R01_cb18456_c6081/flp0/729  | R01_cb18456_c6081/flp0/729  | R01_cb18456_c6081/flp0/729    |
| R01_cb17914_c0/f2p0/1416      | NA                      | NA                          | NA                          | R01_cb17914_c0/f2p0/1416      |
| R01_cb17284_c2/flp0/644       | NA                      | NA                          | NA                          | R01_cb17284_c2/flp0/644       |
| R01_cb16180_c1/flp0/888       | R01_cb16180_c1/flp0/888 | R01_cb16180_c1/flp0/888     | R01_cb16180_c1/flp0/888     | R01_cb16180_c1/flp0/888       |
| R01_cb8564_c72682/flp0/4419   | NA                      | R01_cb8564_c72682/flp0/4419 | R01_cb8564_c72682/flp0/4419 | R01_cb8564_c72682/flp0/4419   |
| R01_cb8400_c3/flp0/2238       | R01_cb8400_c3/flp0/2238 | R01_cb8400_c3/flp0/2238     | R01_cb8400_c3/flp0/2238     | R01_cb8400_c3/flp0/2238       |
| R01_cb8564_c83237/flp0/3616   | NA                      | R01_cb8564_c83237/flp0/3616 | NA                          | NA                            |
| R01_cb6645_c3/flp0/1886       | NA                      | NA                          | NA                          | R01_cb6645_c3/flp0/1886       |

|                             |                            |                             |                             |                             |
|-----------------------------|----------------------------|-----------------------------|-----------------------------|-----------------------------|
| R01_cb8564_c84127/flp1/2448 | NA                         | R01_cb8564_c84127/flp1/2448 | NA                          | R01_cb8564_c84127/flp1/2448 |
| R01_cb14286_c0/f3p0/1237    | R01_cb14286_c0/f3p0/1237   | R01_cb14286_c0/f3p0/1237    | NA                          | R01_cb14286_c0/f3p0/1237    |
| R01_cb10038_c6/flp0/1713    | NA                         | NA                          | NA                          | R01_cb10038_c6/flp0/1713    |
| R01_cb8564_c23967/flp0/4475 | NA                         | NA                          | NA                          | R01_cb8564_c23967/flp0/4475 |
| R01_cb10668_c1/f5p0/617     | NA                         | R01_cb10668_c1/f5p0/617     | NA                          | NA                          |
| R01_cb18241_c0/flp0/983     | NA                         | R01_cb18241_c0/flp0/983     | NA                          | NA                          |
| R01_cb4178_c4/flp0/2194     | NA                         | NA                          | NA                          | R01_cb4178_c4/flp0/2194     |
| R01_cb4134_c46/f5p0/2542    | NA                         | NA                          | NA                          | R01_cb4134_c46/f5p0/2542    |
| R01_cb14547_c5/f6p2/665     | NA                         | R01_cb14547_c5/f6p2/665     | NA                          | NA                          |
| R01_cb12114_c2/fl5p1/1310   | NA                         | NA                          | NA                          | R01_cb12114_c2/fl5p1/1310   |
| R01_cb1964_c7/flp0/1223     | NA                         | NA                          | NA                          | R01_cb1964_c7/flp0/1223     |
| R01_cb10024_c191/flp1/2942  | R01_cb10024_c191/flp1/2942 | R01_cb10024_c191/flp1/2942  | R01_cb10024_c191/flp1/2942  | NA                          |
| R01_cb16720_c1/f2p0/1455    | NA                         | NA                          | NA                          | R01_cb16720_c1/f2p0/1455    |
| R01_cb5357_c9/flp0/2509     | NA                         | R01_cb5357_c9/flp0/2509     | NA                          | NA                          |
| R01_cb8564_c1575/flp0/1934  | NA                         | R01_cb8564_c1575/flp0/1934  | R01_cb8564_c1575/flp0/1934  | R01_cb8564_c1575/flp0/1934  |
| R01_cb11646_c2/flp0/1951    | NA                         | NA                          | NA                          | R01_cb11646_c2/flp0/1951    |
| R01_cb8448_c5/flp0/4066     | NA                         | R01_cb8448_c5/flp0/4066     | NA                          | NA                          |
| R01_cb18456_c4764/flp0/544  | R01_cb18456_c4764/flp0/544 | R01_cb18456_c4764/flp0/544  | NA                          | R01_cb18456_c4764/flp0/544  |
| R01_cb10865_c2/flp0/1428    | NA                         | NA                          | NA                          | R01_cb10865_c2/flp0/1428    |
| R01_cb14474_c0/f2p0/649     | NA                         | NA                          | NA                          | R01_cb14474_c0/f2p0/649     |
| R01_cb9874_c12/flp0/1909    | NA                         | R01_cb9874_c12/flp0/1909    | NA                          | NA                          |
| R01_cb10254_c1/flp0/2096    | NA                         | R01_cb10254_c1/flp0/2096    | NA                          | R01_cb10254_c1/flp0/2096    |
| R01_cb13475_c3/flp0/843     | R01_cb13475_c3/flp0/843    | R01_cb13475_c3/flp0/843     | R01_cb13475_c3/flp0/843     | R01_cb13475_c3/flp0/843     |
| R01_cb18456_c7616/flp0/1056 | NA                         | R01_cb18456_c7616/flp0/1056 | R01_cb18456_c7616/flp0/1056 | R01_cb18456_c7616/flp0/1056 |
| R01_cb8564_c84378/flp1/2886 | NA                         | R01_cb8564_c84378/flp1/2886 | NA                          | R01_cb8564_c84378/flp1/2886 |
| R01_cb8564_c77215/flp0/3514 | NA                         | R01_cb8564_c77215/flp0/3514 | R01_cb8564_c77215/flp0/3514 | R01_cb8564_c77215/flp0/3514 |



|                             |                             |                             |                             |                             |
|-----------------------------|-----------------------------|-----------------------------|-----------------------------|-----------------------------|
| R01_cb16762_c0/f2p0/586     | NA                          | R01_cb16762_c0/f2p0/586     | NA                          | NA                          |
| R01_cb17101_c0/flp0/1233    | NA                          | NA                          | NA                          | R01_cb17101_c0/flp0/1233    |
| R01_cb8564_c21721/flp0/2784 | NA                          | R01_cb8564_c21721/flp0/2784 | NA                          | R01_cb8564_c21721/flp0/2784 |
| R01_cb15679_c3/flp0/1333    | NA                          | NA                          | NA                          | R01_cb15679_c3/flp0/1333    |
| R01_cb9877_c5/flp0/1492     | NA                          | NA                          | NA                          | R01_cb9877_c5/flp0/1492     |
| R01_cb16090_c0/flp0/596     | NA                          | R01_cb16090_c0/flp0/596     | R01_cb16090_c0/flp0/596     | R01_cb16090_c0/flp0/596     |
| R01_cb9519_c2/flp0/1949     | NA                          | R01_cb9519_c2/flp0/1949     | NA                          | NA                          |
| R01_cb18633_c1/flp0/493     | R01_cb18633_c1/flp0/493     | R01_cb18633_c1/flp0/493     | R01_cb18633_c1/flp0/493     | R01_cb18633_c1/flp0/493     |
| R01_cb8564_c111186/flp0/311 | R01_cb8564_c111186/flp0/311 | R01_cb8564_c111186/flp0/311 | R01_cb8564_c111186/flp0/311 | R01_cb8564_c111186/flp0/311 |
| 4                           | 14                          | 4                           | 4                           | 4                           |
| R01_cb15605_c3/flp0/857     | R01_cb15605_c3/flp0/857     | NA                          | R01_cb15605_c3/flp0/857     | R01_cb15605_c3/flp0/857     |
| R01_cb13970_c0/f8p0/989     | NA                          | NA                          | NA                          | R01_cb13970_c0/f8p0/989     |
| R01_cb2638_c4/flp0/5862     | NA                          | NA                          | NA                          | R01_cb2638_c4/flp0/5862     |
| R01_cb4198_c10/flp0/1818    | NA                          | NA                          | NA                          | R01_cb4198_c10/flp0/1818    |
| R01_cb4632_c1/flp0/2685     | NA                          | R01_cb4632_c1/flp0/2685     | NA                          | NA                          |
| R01_cb17251_c6/flp0/468     | NA                          | R01_cb17251_c6/flp0/468     | NA                          | NA                          |
| R01_cb14316_c21/flp0/1403   | NA                          | R01_cb14316_c21/flp0/1403   | R01_cb14316_c21/flp0/1403   | R01_cb14316_c21/flp0/1403   |
| R01_cb18257_c1/flp0/1729    | NA                          | NA                          | NA                          | R01_cb18257_c1/flp0/1729    |
| R01_cb10198_c3/flp0/2554    | NA                          | R01_cb10198_c3/flp0/2554    | NA                          | NA                          |
| R01_cb5664_c3/flp0/764      | NA                          | R01_cb5664_c3/flp0/764      | R01_cb5664_c3/flp0/764      | R01_cb5664_c3/flp0/764      |
| R01_cb5026_c3/flp0/3688     | NA                          | R01_cb5026_c3/flp0/3688     | NA                          | R01_cb5026_c3/flp0/3688     |
| R01_cb4848_c26/flp0/1125    | R01_cb4848_c26/flp0/1125    | R01_cb4848_c26/flp0/1125    | R01_cb4848_c26/flp0/1125    | R01_cb4848_c26/flp0/1125    |
| R01_cb8453_c7/flp0/764      | NA                          | R01_cb8453_c7/flp0/764      | NA                          | NA                          |
| R01_cb7875_c0/flp0/2502     | NA                          | NA                          | NA                          | R01_cb7875_c0/flp0/2502     |
| R01_cb8564_c82215/flp0/2881 | NA                          | NA                          | NA                          | R01_cb8564_c82215/flp0/2881 |
| R01_cb18456_c6659/flp0/906  | NA                          | R01_cb18456_c6659/flp0/906  | NA                          | NA                          |

|                             |                            |                             |                             |                             |
|-----------------------------|----------------------------|-----------------------------|-----------------------------|-----------------------------|
| R01_cb8564_c11775/flp2/3080 | NA                         | NA                          | NA                          | R01_cb8564_c11775/flp2/3080 |
| R01_cb15434_c4/flp0/1772    | NA                         | R01_cb15434_c4/flp0/1772    | NA                          | R01_cb15434_c4/flp0/1772    |
| R01_cb16979_c10/flp0/1003   | NA                         | R01_cb16979_c10/flp0/1003   | NA                          | NA                          |
| R01_cb8564_c74332/flp1/3294 | NA                         | R01_cb8564_c74332/flp1/3294 | R01_cb8564_c74332/flp1/3294 | R01_cb8564_c74332/flp1/3294 |
| R01_cb1425_c1/flp0/4329     | NA                         | NA                          | NA                          | R01_cb1425_c1/flp0/4329     |
| R01_cb10879_c1/flp1/2306    | NA                         | NA                          | R01_cb10879_c1/flp1/2306    | R01_cb10879_c1/flp1/2306    |
| R01_cb10350_c2/f2p2/1101    | NA                         | NA                          | NA                          | R01_cb10350_c2/f2p2/1101    |
| R01_cb14019_c8/flp0/1839    | NA                         | R01_cb14019_c8/flp0/1839    | R01_cb14019_c8/flp0/1839    | R01_cb14019_c8/flp0/1839    |
| R01_cb17393_c0/flp0/523     | NA                         | R01_cb17393_c0/flp0/523     | R01_cb17393_c0/flp0/523     | R01_cb17393_c0/flp0/523     |
| R01_cb17125_c0/flp1/566     | NA                         | NA                          | NA                          | R01_cb17125_c0/flp1/566     |
| R01_cb9114_c1/flp1/2578     | NA                         | R01_cb9114_c1/flp1/2578     | NA                          | NA                          |
| R01_cb13254_c2/flp0/1860    | NA                         | R01_cb13254_c2/flp0/1860    | R01_cb13254_c2/flp0/1860    | R01_cb13254_c2/flp0/1860    |
| R01_cb3712_c4/flp1/2242     | R01_cb3712_c4/flp1/2242    | R01_cb3712_c4/flp1/2242     | NA                          | NA                          |
| R01_cb13941_c2/flp0/1788    | NA                         | R01_cb13941_c2/flp0/1788    | NA                          | NA                          |
| R01_cb18456_c1826/flp2/1166 | NA                         | R01_cb18456_c1826/flp2/1166 | R01_cb18456_c1826/flp2/1166 | R01_cb18456_c1826/flp2/1166 |
| R01_cb2946_c7/f3p0/3714     | NA                         | NA                          | NA                          | R01_cb2946_c7/f3p0/3714     |
| R01_cb3256_c6/flp0/2095     | NA                         | NA                          | NA                          | R01_cb3256_c6/flp0/2095     |
| R01_cb11254_c7/flp0/1743    | NA                         | NA                          | NA                          | R01_cb11254_c7/flp0/1743    |
| R01_cb8564_c21503/flp0/4870 | NA                         | R01_cb8564_c21503/flp0/4870 | NA                          | NA                          |
| R01_cb1523_c7/flp0/2440     | NA                         | R01_cb1523_c7/flp0/2440     | NA                          | R01_cb1523_c7/flp0/2440     |
| R01_cb5900_c158/flp0/1925   | R01_cb5900_c158/flp0/1925  | R01_cb5900_c158/flp0/1925   | R01_cb5900_c158/flp0/1925   | R01_cb5900_c158/flp0/1925   |
| R01_cb16249_c0/f2p0/1122    | NA                         | NA                          | NA                          | R01_cb16249_c0/f2p0/1122    |
| R01_cb13647_c2/f3p0/710     | NA                         | R01_cb13647_c2/f3p0/710     | NA                          | R01_cb13647_c2/f3p0/710     |
| R01_cb4233_c194/flp0/2645   | R01_cb4233_c194/flp0/2645  | R01_cb4233_c194/flp0/2645   | R01_cb4233_c194/flp0/2645   | R01_cb4233_c194/flp0/2645   |
| R01_cb16263_c0/f3p0/542     | R01_cb16263_c0/f3p0/542    | R01_cb16263_c0/f3p0/542     | R01_cb16263_c0/f3p0/542     | R01_cb16263_c0/f3p0/542     |
| R01_cb18456_c6670/f2p0/477  | R01_cb18456_c6670/f2p0/477 | R01_cb18456_c6670/f2p0/477  | R01_cb18456_c6670/f2p0/477  | R01_cb18456_c6670/f2p0/477  |

|                             |                          |                             |                            |                             |
|-----------------------------|--------------------------|-----------------------------|----------------------------|-----------------------------|
| R01_cb8564_c20382/flp0/3171 | NA                       | R01_cb8564_c20382/flp0/3171 | NA                         | NA                          |
| R01_cb4368_c6/flp1/3020     | NA                       | NA                          | NA                         | R01_cb4368_c6/flp1/3020     |
| R01_cb8564_c81520/flp0/2464 | NA                       | R01_cb8564_c81520/flp0/2464 | NA                         | NA                          |
| R01_cb4953_c8/flp0/1585     | NA                       | NA                          | NA                         | R01_cb4953_c8/flp0/1585     |
| R01_cb17446_c1/flp0/1452    | NA                       | NA                          | NA                         | R01_cb17446_c1/flp0/1452    |
| R01_cb15825_c5/flp0/1163    | NA                       | NA                          | R01_cb15825_c5/flp0/1163   | R01_cb15825_c5/flp0/1163    |
| R01_cb10909_c0/f6p0/1815    | NA                       | NA                          | NA                         | R01_cb10909_c0/f6p0/1815    |
| R01_cb4639_c4/flp0/3629     | NA                       | R01_cb4639_c4/flp0/3629     | NA                         | R01_cb4639_c4/flp0/3629     |
| R01_cb18456_c7146/flp0/734  | NA                       | R01_cb18456_c7146/flp0/734  | R01_cb18456_c7146/flp0/734 | R01_cb18456_c7146/flp0/734  |
| R01_cb13319_c19/flp0/365    | R01_cb13319_c19/flp0/365 | R01_cb13319_c19/flp0/365    | R01_cb13319_c19/flp0/365   | R01_cb13319_c19/flp0/365    |
| R01_cb8564_c87734/flp1/2826 | NA                       | NA                          | NA                         | R01_cb8564_c87734/flp1/2826 |
| R01_cb10475_c1/flp0/1472    | NA                       | R01_cb10475_c1/flp0/1472    | NA                         | NA                          |
| R01_cb2821_c0/flp0/3647     | NA                       | R01_cb2821_c0/flp0/3647     | NA                         | NA                          |
| R01_cb13146_c3/flp0/514     | R01_cb13146_c3/flp0/514  | R01_cb13146_c3/flp0/514     | R01_cb13146_c3/flp0/514    | R01_cb13146_c3/flp0/514     |
| R01_cb5316_c0/flp0/3033     | NA                       | R01_cb5316_c0/flp0/3033     | NA                         | NA                          |
| R01_cb4370_c4/flp0/2998     | NA                       | NA                          | NA                         | R01_cb4370_c4/flp0/2998     |
| R01_cb7484_c1/flp0/3557     | NA                       | R01_cb7484_c1/flp0/3557     | NA                         | NA                          |
| R01_cb11695_c2/flp0/620     | NA                       | NA                          | NA                         | R01_cb11695_c2/flp0/620     |
| R01_cb5217_c5/flp0/1148     | NA                       | NA                          | NA                         | R01_cb5217_c5/flp0/1148     |
| R01_cb6149_c0/flp0/2925     | NA                       | R01_cb6149_c0/flp0/2925     | NA                         | NA                          |
| R01_cb10375_c5/flp2/1608    | NA                       | NA                          | NA                         | R01_cb10375_c5/flp2/1608    |
| R01_cb7497_c19/flp0/1727    | NA                       | NA                          | NA                         | R01_cb7497_c19/flp0/1727    |
| R01_cb6406_c45/flp0/2958    | NA                       | R01_cb6406_c45/flp0/2958    | NA                         | R01_cb6406_c45/flp0/2958    |
| R01_cb14761_c7/flp0/1768    | R01_cb14761_c7/flp0/1768 | R01_cb14761_c7/flp0/1768    | R01_cb14761_c7/flp0/1768   | R01_cb14761_c7/flp0/1768    |
| R01_cb8564_c15253/flp3/4330 | NA                       | R01_cb8564_c15253/flp3/4330 | NA                         | R01_cb8564_c15253/flp3/4330 |
| R01_cb8973_c2/flp0/2001     | R01_cb8973_c2/flp0/2001  | R01_cb8973_c2/flp0/2001     | NA                         | NA                          |

|                             |                                  |                             |                             |                             |
|-----------------------------|----------------------------------|-----------------------------|-----------------------------|-----------------------------|
| R01_cb12379_c0/f3p1/587     | R01_cb12379_c0/f3p1/587          | R01_cb12379_c0/f3p1/587     | R01_cb12379_c0/f3p1/587     | R01_cb12379_c0/f3p1/587     |
| R01_cb10345_c4/f1p0/1777    | NA                               | NA                          | NA                          | R01_cb10345_c4/f1p0/1777    |
| R01_cb7877_c2/f1p0/2718     | NA                               | R01_cb7877_c2/f1p0/2718     | R01_cb7877_c2/f1p0/2718     | R01_cb7877_c2/f1p0/2718     |
| R01_cb6170_c12/f1p1/2612    | NA                               | NA                          | NA                          | R01_cb6170_c12/f1p1/2612    |
| R01_cb8564_c76977/f1p0/2097 | NA                               | NA                          | NA                          | R01_cb8564_c76977/f1p0/2097 |
| R01_cb920_c6/f1p0/4092      | NA                               | NA                          | NA                          | R01_cb920_c6/f1p0/4092      |
| R01_cb16812_c0/f2p0/675     | R01_cb16812_c0/f2p0/675          | R01_cb16812_c0/f2p0/675     | R01_cb16812_c0/f2p0/675     | NA                          |
| R01_cb4609_c1/f1p0/3297     | NA                               | R01_cb4609_c1/f1p0/3297     | NA                          | R01_cb4609_c1/f1p0/3297     |
| R01_cb8564_c18742/f1p0/4462 | NA                               | R01_cb8564_c18742/f1p0/4462 | NA                          | NA                          |
| R01_cb9500_c7/f1p0/2195     | NA                               | NA                          | NA                          | R01_cb9500_c7/f1p0/2195     |
| R01_cb1594_c9/f1p0/2443     | NA                               | NA                          | NA                          | R01_cb1594_c9/f1p0/2443     |
| R01_cb3017_c10/f1p0/5945    | NA                               | R01_cb3017_c10/f1p0/5945    | NA                          | NA                          |
| R01_cb8564_c53969/f1p0/2351 | R01_cb8564_c53969/f1p0/2351<br>1 | R01_cb8564_c53969/f1p0/2351 | R01_cb8564_c53969/f1p0/2351 | R01_cb8564_c53969/f1p0/2351 |
| R01_cb14708_c2/f1p0/891     | NA                               | R01_cb14708_c2/f1p0/891     | NA                          | NA                          |
| R01_cb6732_c27/f1p1/540     | R01_cb6732_c27/f1p1/540          | R01_cb6732_c27/f1p1/540     | NA                          | R01_cb6732_c27/f1p1/540     |
| R01_cb13433_c38/f1p0/1350   | NA                               | NA                          | NA                          | R01_cb13433_c38/f1p0/1350   |
| R01_cb16945_c2/f1p0/1505    | NA                               | R01_cb16945_c2/f1p0/1505    | NA                          | NA                          |
| R01_cb8564_c494/f6p1/2566   | NA                               | NA                          | R01_cb8564_c494/f6p1/2566   | R01_cb8564_c494/f6p1/2566   |
| R01_cb18601_c0/f2p0/579     | R01_cb18601_c0/f2p0/579          | R01_cb18601_c0/f2p0/579     | R01_cb18601_c0/f2p0/579     | R01_cb18601_c0/f2p0/579     |
| R01_cb10658_c4/f1p0/670     | NA                               | R01_cb10658_c4/f1p0/670     | NA                          | NA                          |
| R01_cb8564_c17335/f1p0/2809 | NA                               | R01_cb8564_c17335/f1p0/2809 | NA                          | R01_cb8564_c17335/f1p0/2809 |
| R01_cb8564_c90714/f1p0/3784 | NA                               | R01_cb8564_c90714/f1p0/3784 | NA                          | NA                          |
| R01_cb12939_c8/f1p0/1310    | NA                               | R01_cb12939_c8/f1p0/1310    | NA                          | NA                          |
| R01_cb2845_c38/f1p0/1808    | NA                               | NA                          | NA                          | R01_cb2845_c38/f1p0/1808    |
| R01_cb8564_c120044/f1p0/244 | R01_cb8564_c120044/f1p0/244      | R01_cb8564_c120044/f1p0/244 | R01_cb8564_c120044/f1p0/244 | R01_cb8564_c120044/f1p0/244 |

|                              |                             |                             |                             |                              |
|------------------------------|-----------------------------|-----------------------------|-----------------------------|------------------------------|
| 1                            | 41                          | 1                           | 1                           | 1                            |
| R01_cb11888_c1/flp0/1739     | R01_cb11888_c1/flp0/1739    | R01_cb11888_c1/flp0/1739    | R01_cb11888_c1/flp0/1739    | R01_cb11888_c1/flp0/1739     |
| R01_cb13103_c4/flp0/567      | NA                          | R01_cb13103_c4/flp0/567     | NA                          | NA                           |
| R01_cb8564_c36067/flp0/3044  | R01_cb8564_c36067/flp0/3044 | R01_cb8564_c36067/flp0/3044 | R01_cb8564_c36067/flp0/3044 | R01_cb8564_c36067/flp0/3044  |
| R01_cb8564_c119299/flp0/3248 | NA                          | NA                          | NA                          | R01_cb8564_c119299/flp0/3248 |
| R01_cb10571_c2/flp0/985      | NA                          | R01_cb10571_c2/flp0/985     | NA                          | NA                           |
| R01_cb3341_c5/flp0/3652      | NA                          | R01_cb3341_c5/flp0/3652     | NA                          | R01_cb3341_c5/flp0/3652      |
| R01_cb11918_c20/flp0/1139    | NA                          | NA                          | NA                          | R01_cb11918_c20/flp0/1139    |
| R01_cb13502_c2/flp0/1429     | NA                          | R01_cb13502_c2/flp0/1429    | NA                          | R01_cb13502_c2/flp0/1429     |
| R01_cb7027_c2/flp0/1772      | NA                          | R01_cb7027_c2/flp0/1772     | NA                          | NA                           |
| R01_cb8564_c25599/flp0/3149  | R01_cb8564_c25599/flp0/3149 | R01_cb8564_c25599/flp0/3149 | R01_cb8564_c25599/flp0/3149 | R01_cb8564_c25599/flp0/3149  |
| R01_cb16662_c4/flp0/591      | R01_cb16662_c4/flp0/591     | R01_cb16662_c4/flp0/591     | R01_cb16662_c4/flp0/591     | R01_cb16662_c4/flp0/591      |
| R01_cb11242_c2/flp0/2487     | NA                          | R01_cb11242_c2/flp0/2487    | NA                          | NA                           |
| R01_cb8564_c108825/flp3/1911 | NA                          | NA                          | NA                          | R01_cb8564_c108825/flp3/1911 |
| R01_cb18523_c0/flp0/1806     | NA                          | R01_cb18523_c0/flp0/1806    | NA                          | R01_cb18523_c0/flp0/1806     |
| R01_cb11102_c2/flp0/2548     | NA                          | R01_cb11102_c2/flp0/2548    | NA                          | R01_cb11102_c2/flp0/2548     |
| R01_cb14816_c6/flp0/756      | NA                          | R01_cb14816_c6/flp0/756     | NA                          | NA                           |
| R01_cb17413_c4/flp0/1639     | NA                          | R01_cb17413_c4/flp0/1639    | NA                          | NA                           |
| R01_cb4185_c6/flp0/1375      | NA                          | NA                          | NA                          | R01_cb4185_c6/flp0/1375      |
| R01_cb12204_c1/f2p0/1289     | R01_cb12204_c1/f2p0/1289    | R01_cb12204_c1/f2p0/1289    | R01_cb12204_c1/f2p0/1289    | R01_cb12204_c1/f2p0/1289     |
| R01_cb18456_c1461/f4p0/588   | R01_cb18456_c1461/f4p0/588  | R01_cb18456_c1461/f4p0/588  | R01_cb18456_c1461/f4p0/588  | R01_cb18456_c1461/f4p0/588   |
| R01_cb11471_c1/flp0/3135     | NA                          | R01_cb11471_c1/flp0/3135    | R01_cb11471_c1/flp0/3135    | R01_cb11471_c1/flp0/3135     |

|                                  |                                  |                                  |                             |                                  |
|----------------------------------|----------------------------------|----------------------------------|-----------------------------|----------------------------------|
| R01_cb27_c12/flp0/1234           | NA                               | NA                               | NA                          | R01_cb27_c12/flp0/1234           |
| R01_cb4066_c10/flp1/3649         | NA                               | R01_cb4066_c10/flp1/3649         | NA                          | NA                               |
| R01_cb18087_c3/flp0/1151         | R01_cb18087_c3/flp0/1151         | R01_cb18087_c3/flp0/1151         | NA                          | R01_cb18087_c3/flp0/1151         |
| R01_cb8564_c127970/flp0/275<br>1 | NA                               | R01_cb8564_c127970/flp0/275<br>1 | NA                          | R01_cb8564_c127970/flp0/275<br>1 |
| R01_cb3618_c12/flp0/2946         | NA                               | NA                               | NA                          | R01_cb3618_c12/flp0/2946         |
| R01_cb7302_c2/flp0/3538          | NA                               | R01_cb7302_c2/flp0/3538          | NA                          | R01_cb7302_c2/flp0/3538          |
| R01_cb3500_c24/flp0/3152         | NA                               | NA                               | NA                          | R01_cb3500_c24/flp0/3152         |
| R01_cb123_c6/flp0/5119           | NA                               | NA                               | NA                          | R01_cb123_c6/flp0/5119           |
| R01_cb4001_c0/f3p0/806           | NA                               | NA                               | NA                          | R01_cb4001_c0/f3p0/806           |
| R01_cb8759_c1/flp0/2690          | NA                               | R01_cb8759_c1/flp0/2690          | NA                          | R01_cb8759_c1/flp0/2690          |
| R01_cb5258_c1/flp0/3137          | NA                               | R01_cb5258_c1/flp0/3137          | NA                          | R01_cb5258_c1/flp0/3137          |
| R01_cb781_c40/flp0/1031          | NA                               | NA                               | NA                          | R01_cb781_c40/flp0/1031          |
| R01_cb8564_c78298/flp0/3862<br>2 | R01_cb8564_c78298/flp0/3862<br>2 | R01_cb8564_c78298/flp0/3862      | R01_cb8564_c78298/flp0/3862 | R01_cb8564_c78298/flp0/3862      |
| R01_cb16061_c1/flp0/497          | NA                               | R01_cb16061_c1/flp0/497          | NA                          | NA                               |
| R01_cb5659_c70/flp0/2387         | NA                               | NA                               | NA                          | R01_cb5659_c70/flp0/2387         |
| R01_cb105_c21/flp0/2514          | NA                               | R01_cb105_c21/flp0/2514          | R01_cb105_c21/flp0/2514     | R01_cb105_c21/flp0/2514          |
| R01_cb943_c5/flp0/7144           | NA                               | NA                               | NA                          | R01_cb943_c5/flp0/7144           |
| R01_cb8564_c42176/flp0/3183      | NA                               | NA                               | NA                          | R01_cb8564_c42176/flp0/3183      |
| R01_cb1936_c0/flp0/4121          | NA                               | R01_cb1936_c0/flp0/4121          | R01_cb1936_c0/flp0/4121     | R01_cb1936_c0/flp0/4121          |
| R01_cb9487_c4/flp0/3425          | NA                               | R01_cb9487_c4/flp0/3425          | NA                          | NA                               |
| R01_cb1023_c0/flp0/4515          | NA                               | R01_cb1023_c0/flp0/4515          | NA                          | NA                               |
| R01_cb11037_c3/flp0/1642         | NA                               | R01_cb11037_c3/flp0/1642         | NA                          | R01_cb11037_c3/flp0/1642         |
| R01_cb7536_c4/flp0/443           | NA                               | R01_cb7536_c4/flp0/443           | R01_cb7536_c4/flp0/443      | R01_cb7536_c4/flp0/443           |
| R01_cb5122_c5/flp0/3166          | NA                               | NA                               | NA                          | R01_cb5122_c5/flp0/3166          |

|                              |                             |                              |                             |                             |
|------------------------------|-----------------------------|------------------------------|-----------------------------|-----------------------------|
| R01_cb9529_c3/flp0/1074      | NA                          | NA                           | NA                          | R01_cb9529_c3/flp0/1074     |
| R01_cb15488_c1/flp0/1876     | NA                          | R01_cb15488_c1/flp0/1876     | NA                          | NA                          |
| R01_cb454_c6/flp0/4805       | NA                          | NA                           | NA                          | R01_cb454_c6/flp0/4805      |
| R01_cb12480_c4/flp0/718      | R01_cb12480_c4/flp0/718     | R01_cb12480_c4/flp0/718      | R01_cb12480_c4/flp0/718     | R01_cb12480_c4/flp0/718     |
| R01_cb8564_c110370/flp0/3044 | NA                          | R01_cb8564_c110370/flp0/3044 | NA                          | NA                          |
| R01_cb18456_c3397/flp0/1025  | R01_cb18456_c3397/flp0/1025 | NA                           | NA                          | NA                          |
| R01_cb2771_c4/flp0/3815      | NA                          | NA                           | NA                          | R01_cb2771_c4/flp0/3815     |
| R01_cb5889_c1/flp0/3412      | NA                          | NA                           | NA                          | R01_cb5889_c1/flp0/3412     |
| R01_cb16125_c10/flp0/1414    | NA                          | R01_cb16125_c10/flp0/1414    | NA                          | R01_cb16125_c10/flp0/1414   |
| R01_cb1352_c2/flp0/1936      | NA                          | R01_cb1352_c2/flp0/1936      | NA                          | NA                          |
| R01_cb8639_c0/flp0/2324      | NA                          | R01_cb8639_c0/flp0/2324      | NA                          | NA                          |
| R01_cb16913_c4/flp0/588      | NA                          | R01_cb16913_c4/flp0/588      | NA                          | NA                          |
| R01_cb8564_c22596/flp0/2059  | NA                          | R01_cb8564_c22596/flp0/2059  | R01_cb8564_c22596/flp0/2059 | R01_cb8564_c22596/flp0/2059 |
| R01_cb8324_c0/f6p0/1480      | NA                          | NA                           | NA                          | R01_cb8324_c0/f6p0/1480     |
| R01_cb1594_c8/f2p0/2363      | NA                          | NA                           | NA                          | R01_cb1594_c8/f2p0/2363     |
| R01_cb8564_c90273/flp0/2581  | NA                          | R01_cb8564_c90273/flp0/2581  | NA                          | NA                          |
| R01_cb9222_c14/flp0/2490     | NA                          | R01_cb9222_c14/flp0/2490     | NA                          | NA                          |
| R01_cb16092_c3/flp1/533      | R01_cb16092_c3/flp1/533     | R01_cb16092_c3/flp1/533      | R01_cb16092_c3/flp1/533     | R01_cb16092_c3/flp1/533     |
| R01_cb8564_c71841/flp0/2705  | NA                          | R01_cb8564_c71841/flp0/2705  | R01_cb8564_c71841/flp0/2705 | R01_cb8564_c71841/flp0/2705 |
| R01_cb1087_c3/flp0/2382      | NA                          | NA                           | R01_cb1087_c3/flp0/2382     | R01_cb1087_c3/flp0/2382     |
| R01_cb16311_c3/flp0/1175     | NA                          | NA                           | NA                          | R01_cb16311_c3/flp0/1175    |
| R01_cb11850_c3/f4p1/599      | NA                          | R01_cb11850_c3/f4p1/599      | NA                          | NA                          |
| R01_cb8564_c80943/flp0/2583  | NA                          | R01_cb8564_c80943/flp0/2583  | NA                          | NA                          |
| R01_cb5659_c53/flp0/2198     | NA                          | R01_cb5659_c53/flp0/2198     | NA                          | NA                          |

|                             |                          |                             |                          |                             |
|-----------------------------|--------------------------|-----------------------------|--------------------------|-----------------------------|
| R01_cb6894_c2/flp0/1023     | NA                       | R01_cb6894_c2/flp0/1023     | R01_cb6894_c2/flp0/1023  | R01_cb6894_c2/flp0/1023     |
| R01_cb15990_c0/f4p0/1141    | NA                       | NA                          | NA                       | R01_cb15990_c0/f4p0/1141    |
| R01_cb7296_c10/flp1/1975    | NA                       | NA                          | NA                       | R01_cb7296_c10/flp1/1975    |
| R01_cb13690_c7/flp0/314     | R01_cb13690_c7/flp0/314  | R01_cb13690_c7/flp0/314     | R01_cb13690_c7/flp0/314  | R01_cb13690_c7/flp0/314     |
| R01_cb693_c7/flp0/2901      | NA                       | NA                          | NA                       | R01_cb693_c7/flp0/2901      |
| R01_cb14547_c18/flp2/650    | NA                       | R01_cb14547_c18/flp2/650    | NA                       | NA                          |
| R01_cb14493_c4/flp0/1047    | NA                       | R01_cb14493_c4/flp0/1047    | R01_cb14493_c4/flp0/1047 | R01_cb14493_c4/flp0/1047    |
| R01_cb1626_c8/flp1/2673     | NA                       | NA                          | NA                       | R01_cb1626_c8/flp1/2673     |
| R01_cb18712_c1/flp0/2646    | R01_cb18712_c1/flp0/2646 | R01_cb18712_c1/flp0/2646    | R01_cb18712_c1/flp0/2646 | R01_cb18712_c1/flp0/2646    |
| R01_cb9420_c0/f2p0/2092     | NA                       | NA                          | NA                       | R01_cb9420_c0/f2p0/2092     |
| R01_cb12192_c0/f9p0/429     | NA                       | R01_cb12192_c0/f9p0/429     | NA                       | NA                          |
| R01_cb1533_c9/flp0/1687     | NA                       | R01_cb1533_c9/flp0/1687     | NA                       | NA                          |
| R01_cb8564_c74334/flp0/2963 | NA                       | R01_cb8564_c74334/flp0/2963 | NA                       | NA                          |
| R01_cb1095_c18/flp1/5545    | NA                       | NA                          | NA                       | R01_cb1095_c18/flp1/5545    |
| R01_cb5595_c6/flp0/2093     | NA                       | R01_cb5595_c6/flp0/2093     | NA                       | NA                          |
| R01_cb14940_c6/flp0/685     | NA                       | NA                          | R01_cb14940_c6/flp0/685  | R01_cb14940_c6/flp0/685     |
| R01_cb18456_c6698/flp0/652  | NA                       | R01_cb18456_c6698/flp0/652  | NA                       | NA                          |
| R01_cb1881_c3/flp0/3916     | NA                       | R01_cb1881_c3/flp0/3916     | NA                       | NA                          |
| R01_cb11254_c1/f2p0/1762    | NA                       | NA                          | NA                       | R01_cb11254_c1/f2p0/1762    |
| R01_cb15934_c1/flp0/620     | R01_cb15934_c1/flp0/620  | R01_cb15934_c1/flp0/620     | NA                       | R01_cb15934_c1/flp0/620     |
| R01_cb6686_c0/f2p0/2564     | NA                       | R01_cb6686_c0/f2p0/2564     | R01_cb6686_c0/f2p0/2564  | NA                          |
| R01_cb1119_c14/flp0/2501    | NA                       | R01_cb1119_c14/flp0/2501    | NA                       | NA                          |
| R01_cb8564_c20867/flp0/1948 | NA                       | R01_cb8564_c20867/flp0/1948 | NA                       | R01_cb8564_c20867/flp0/1948 |
| R01_cb13563_c3/flp0/851     | NA                       | R01_cb13563_c3/flp0/851     | NA                       | NA                          |
| R01_cb110_c11/flp1/3647     | NA                       | NA                          | NA                       | R01_cb110_c11/flp1/3647     |
| R01_cb8345_c0/flp0/2394     | NA                       | NA                          | NA                       | R01_cb8345_c0/flp0/2394     |



|                              |                          |                             |                             |                              |
|------------------------------|--------------------------|-----------------------------|-----------------------------|------------------------------|
| R01_cb2878_c6/flp0/1687      | NA                       | R01_cb2878_c6/flp0/1687     | R01_cb2878_c6/flp0/1687     | R01_cb2878_c6/flp0/1687      |
| R01_cb11695_c0/flp1/995      | NA                       | NA                          | NA                          | R01_cb11695_c0/flp1/995      |
| R01_cb16665_c0/flp0/977      | NA                       | NA                          | R01_cb16665_c0/flp0/977     | R01_cb16665_c0/flp0/977      |
| R01_cb8414_c1/flp0/2405      | R01_cb8414_c1/flp0/2405  | R01_cb8414_c1/flp0/2405     | NA                          | R01_cb8414_c1/flp0/2405      |
| R01_cb8564_c17696/flp0/3569  | NA                       | R01_cb8564_c17696/flp0/3569 | R01_cb8564_c17696/flp0/3569 | R01_cb8564_c17696/flp0/3569  |
| R01_cb5533_c168/flp0/444     | R01_cb5533_c168/flp0/444 | R01_cb5533_c168/flp0/444    | R01_cb5533_c168/flp0/444    | R01_cb5533_c168/flp0/444     |
| R01_cb8564_c115280/flp0/2295 | NA                       | NA                          | NA                          | R01_cb8564_c115280/flp0/2295 |
| R01_cb8564_c1994/flp0/2024   | NA                       | NA                          | NA                          | R01_cb8564_c1994/flp0/2024   |
| R01_cb6147_c35/flp0/2856     | NA                       | R01_cb6147_c35/flp0/2856    | NA                          | NA                           |
| R01_cb8564_c17194/flp0/4162  | NA                       | R01_cb8564_c17194/flp0/4162 | NA                          | NA                           |
| R01_cb2357_c9/flp1/3967      | NA                       | NA                          | NA                          | R01_cb2357_c9/flp1/3967      |
| R01_cb12556_c1/flp0/1614     | NA                       | R01_cb12556_c1/flp0/1614    | NA                          | R01_cb12556_c1/flp0/1614     |
| R01_cb13433_c49/flp0/3824    | NA                       | R01_cb13433_c49/flp0/3824   | NA                          | NA                           |
| R01_cb11145_c1/flp0/2190     | R01_cb11145_c1/flp0/2190 | R01_cb11145_c1/flp0/2190    | R01_cb11145_c1/flp0/2190    | R01_cb11145_c1/flp0/2190     |
| R01_cb5702_c6/flp0/1304      | NA                       | R01_cb5702_c6/flp0/1304     | NA                          | NA                           |
| R01_cb11637_c1/flp0/2015     | NA                       | R01_cb11637_c1/flp0/2015    | NA                          | NA                           |
| R01_cb10214_c1/flp0/1935     | R01_cb10214_c1/flp0/1935 | R01_cb10214_c1/flp0/1935    | R01_cb10214_c1/flp0/1935    | R01_cb10214_c1/flp0/1935     |
| R01_cb9882_c0/flp1/1018      | R01_cb9882_c0/flp1/1018  | NA                          | NA                          | NA                           |
| R01_cb8564_c48385/flp0/3125  | NA                       | R01_cb8564_c48385/flp0/3125 | NA                          | NA                           |
| R01_cb11709_c1/flp0/3558     | NA                       | NA                          | NA                          | R01_cb11709_c1/flp0/3558     |
| R01_cb5929_c2/flp0/2974      | NA                       | NA                          | NA                          | R01_cb5929_c2/flp0/2974      |
| R01_cb15555_c2/flp0/1365     | NA                       | R01_cb15555_c2/flp0/1365    | NA                          | NA                           |
| R01_cb11733_c1/flp0/2247     | NA                       | NA                          | NA                          | R01_cb11733_c1/flp0/2247     |
| R01_cb15483_c0/flp0/1039     | NA                       | R01_cb15483_c0/flp0/1039    | NA                          | NA                           |
| R01_cb8564_c85678/flp0/3912  | NA                       | R01_cb8564_c85678/flp0/3912 | NA                          | NA                           |

|                                  |                             |                                  |                              |                             |
|----------------------------------|-----------------------------|----------------------------------|------------------------------|-----------------------------|
| R01_cb8564_c147879/flp0/295<br>5 | NA                          | R01_cb8564_c147879/flp0/295<br>5 | NA                           | NA                          |
| R01_cb8564_c16877/flp0/2124      | R01_cb8564_c16877/flp0/2124 | R01_cb8564_c16877/flp0/2124      | NA                           | NA                          |
| R01_cb12616_c2/flp0/1464         | NA                          | NA                               | NA                           | R01_cb12616_c2/flp0/1464    |
| R01_cb14537_c0/flp0/511          | R01_cb14537_c0/flp0/511     | R01_cb14537_c0/flp0/511          | NA                           | R01_cb14537_c0/flp0/511     |
| R01_cb8564_c21793/flp0/2841      | NA                          | R01_cb8564_c21793/flp0/2841      | NA                           | NA                          |
| R01_cb8564_c117016/flp0/2202     | NA                          | R01_cb8564_c117016/flp0/2202     | NA                           | NA                          |
| R01_cb11804_c1/flp0/3756         | R01_cb11804_c1/flp0/3756    | R01_cb11804_c1/flp0/3756         | R01_cb11804_c1/flp0/3756     | R01_cb11804_c1/flp0/3756    |
| R01_cb8564_c48585/flp0/2528      | NA                          | NA                               | NA                           | R01_cb8564_c48585/flp0/2528 |
| R01_cb1519_c31/flp0/1681         | NA                          | R01_cb1519_c31/flp0/1681         | NA                           | NA                          |
| R01_cb8564_c122688/flp0/2138     | NA                          | NA                               | R01_cb8564_c122688/flp0/2138 | NA                          |
| R01_cb551_c19/flp0/2034          | NA                          | R01_cb551_c19/flp0/2034          | NA                           | NA                          |
| R01_cb8564_c114136/flp0/2409     | NA                          | R01_cb8564_c114136/flp0/2409     | NA                           | NA                          |
| R01_cb9814_c4/flp0/666           | NA                          | R01_cb9814_c4/flp0/666           | NA                           | R01_cb9814_c4/flp0/666      |
| R01_cb17163_c0/flp0/1035         | NA                          | R01_cb17163_c0/flp0/1035         | R01_cb17163_c0/flp0/1035     | R01_cb17163_c0/flp0/1035    |
| R01_cb5255_c11/flp0/1222         | NA                          | R01_cb5255_c11/flp0/1222         | R01_cb5255_c11/flp0/1222     | R01_cb5255_c11/flp0/1222    |
| R01_cb8564_c78107/flp1/2897      | NA                          | R01_cb8564_c78107/flp1/2897      | NA                           | NA                          |
| R01_cb16818_c4/flp0/825          | R01_cb16818_c4/flp0/825     | R01_cb16818_c4/flp0/825          | R01_cb16818_c4/flp0/825      | R01_cb16818_c4/flp0/825     |
| R01_cb8564_c14685/flp0/2165      | NA                          | R01_cb8564_c14685/flp0/2165      | NA                           | R01_cb8564_c14685/flp0/2165 |
| R01_cb17931_c1/f3p0/468          | R01_cb17931_c1/f3p0/468     | NA                               | NA                           | R01_cb17931_c1/f3p0/468     |
| R01_cb16706_c4/flp0/701          | NA                          | R01_cb16706_c4/flp0/701          | NA                           | R01_cb16706_c4/flp0/701     |
| R01_cb1459_c3/flp1/3193          | NA                          | R01_cb1459_c3/flp1/3193          | NA                           | NA                          |

|                                  |                            |                                  |                                  |                                  |
|----------------------------------|----------------------------|----------------------------------|----------------------------------|----------------------------------|
| R01_cb8564_c179151/flp1/204<br>5 | NA                         | R01_cb8564_c179151/flp1/204<br>5 | R01_cb8564_c179151/flp1/204<br>5 | R01_cb8564_c179151/flp1/204<br>5 |
| R01_cb18456_c1819/flp0/838       | NA                         | NA                               | NA                               | R01_cb18456_c1819/flp0/838       |
| R01_cb8564_c70436/flp0/3032      | NA                         | NA                               | NA                               | R01_cb8564_c70436/flp0/3032      |
| R01_cb16797_c2/flp0/454          | R01_cb16797_c2/flp0/454    | R01_cb16797_c2/flp0/454          | NA                               | R01_cb16797_c2/flp0/454          |
| R01_cb8564_c121844/flp0/192<br>7 | NA                         | R01_cb8564_c121844/flp0/192<br>7 | NA                               | NA                               |
| R01_cb18456_c6640/flp0/577       | R01_cb18456_c6640/flp0/577 | R01_cb18456_c6640/flp0/577       | R01_cb18456_c6640/flp0/577       | R01_cb18456_c6640/flp0/577       |
| R01_cb7256_c5/flp0/1439          | NA                         | R01_cb7256_c5/flp0/1439          | NA                               | NA                               |
| R01_cb3921_c1/flp0/2047          | NA                         | NA                               | NA                               | R01_cb3921_c1/flp0/2047          |
| R01_cb2845_c36/flp0/3417         | NA                         | NA                               | NA                               | R01_cb2845_c36/flp0/3417         |
| R01_cb18456_c868/flp0/484        | NA                         | NA                               | NA                               | R01_cb18456_c868/flp0/484        |
| R01_cb12321_c851/flp0/546        | R01_cb12321_c851/flp0/546  | R01_cb12321_c851/flp0/546        | R01_cb12321_c851/flp0/546        | NA                               |
| R01_cb18208_c1/flp0/1093         | NA                         | R01_cb18208_c1/flp0/1093         | R01_cb18208_c1/flp0/1093         | R01_cb18208_c1/flp0/1093         |
| R01_cb8564_c82335/flp0/2498      | NA                         | R01_cb8564_c82335/flp0/2498      | NA                               | NA                               |
| R01_cb8564_c118758/flp0/281<br>2 | NA                         | R01_cb8564_c118758/flp0/281<br>2 | NA                               | R01_cb8564_c118758/flp0/281<br>2 |
| R01_cb15337_c2/flp0/1634         | NA                         | NA                               | NA                               | R01_cb15337_c2/flp0/1634         |
| R01_cb3121_c1/flp0/3714          | NA                         | R01_cb3121_c1/flp0/3714          | R01_cb3121_c1/flp0/3714          | NA                               |
| R01_cb1096_c9/flp0/2933          | NA                         | NA                               | NA                               | R01_cb1096_c9/flp0/2933          |
| R01_cb1230_c5/flp0/2699          | NA                         | R01_cb1230_c5/flp0/2699          | R01_cb1230_c5/flp0/2699          | R01_cb1230_c5/flp0/2699          |
| R01_cb8414_c0/flp0/2375          | NA                         | NA                               | NA                               | R01_cb8414_c0/flp0/2375          |
| R01_cb18456_c6070/flp0/443       | NA                         | R01_cb18456_c6070/flp0/443       | NA                               | R01_cb18456_c6070/flp0/443       |
| R01_cb822_c4/f3p2/2466           | NA                         | NA                               | NA                               | R01_cb822_c4/f3p2/2466           |
| R01_cb6606_c7/f2p0/2812          | NA                         | NA                               | NA                               | R01_cb6606_c7/f2p0/2812          |
| R01_cb11841_c0/flp0/1393         | NA                         | R01_cb11841_c0/flp0/1393         | NA                               | R01_cb11841_c0/flp0/1393         |

|                                  |                          |                                  |                         |                                  |
|----------------------------------|--------------------------|----------------------------------|-------------------------|----------------------------------|
| R01_cb8564_c120096/flp0/346<br>2 | NA                       | R01_cb8564_c120096/flp0/346<br>2 | NA                      | R01_cb8564_c120096/flp0/346<br>2 |
| R01_cb17412_c2/flp0/770          | NA                       | R01_cb17412_c2/flp0/770          | NA                      | R01_cb17412_c2/flp0/770          |
| R01_cb18005_c4/flp0/480          | NA                       | NA                               | R01_cb18005_c4/flp0/480 | R01_cb18005_c4/flp0/480          |
| R01_cb893_c12/flp0/5658          | NA                       | NA                               | NA                      | R01_cb893_c12/flp0/5658          |
| R01_cb12459_c8/flp0/532          | R01_cb12459_c8/flp0/532  | R01_cb12459_c8/flp0/532          | R01_cb12459_c8/flp0/532 | R01_cb12459_c8/flp0/532          |
| R01_cb1283_c4/flp0/3882          | NA                       | NA                               | NA                      | R01_cb1283_c4/flp0/3882          |
| R01_cb2160_c12/flp0/4626         | NA                       | NA                               | NA                      | R01_cb2160_c12/flp0/4626         |
| R01_cb2729_c1/flp0/1933          | R01_cb2729_c1/flp0/1933  | R01_cb2729_c1/flp0/1933          | NA                      | R01_cb2729_c1/flp0/1933          |
| R01_cb1178_c26/flp0/1213         | NA                       | R01_cb1178_c26/flp0/1213         | NA                      | R01_cb1178_c26/flp0/1213         |
| R01_cb2045_c3/flp0/4072          | NA                       | R01_cb2045_c3/flp0/4072          | NA                      | R01_cb2045_c3/flp0/4072          |
| R01_cb16979_c5/flp0/774          | R01_cb16979_c5/flp0/774  | R01_cb16979_c5/flp0/774          | R01_cb16979_c5/flp0/774 | R01_cb16979_c5/flp0/774          |
| R01_cb18456_c1855/flp1/1135      | NA                       | NA                               | NA                      | R01_cb18456_c1855/flp1/1135      |
| R01_cb11126_c1/flp0/2685         | R01_cb11126_c1/flp0/2685 | R01_cb11126_c1/flp0/2685         | NA                      | NA                               |
| R01_cb8564_c25411/flp0/2393      | NA                       | NA                               | NA                      | R01_cb8564_c25411/flp0/2393      |
| R01_cb8564_c13615/flp0/3945      | NA                       | R01_cb8564_c13615/flp0/3945      | NA                      | NA                               |
| R01_cb8513_c1/flp0/2026          | NA                       | NA                               | NA                      | R01_cb8513_c1/flp0/2026          |
| R01_cb8564_c15171/flp0/3320      | NA                       | R01_cb8564_c15171/flp0/3320      | NA                      | NA                               |
| R01_cb12023_c2/flp0/760          | NA                       | NA                               | NA                      | R01_cb12023_c2/flp0/760          |
| R01_cb16076_c5/flp0/650          | NA                       | NA                               | R01_cb16076_c5/flp0/650 | R01_cb16076_c5/flp0/650          |
| R01_cb11485_c1/flp0/3256         | NA                       | R01_cb11485_c1/flp0/3256         | NA                      | NA                               |
| R01_cb8564_c73047/flp0/2636      | NA                       | R01_cb8564_c73047/flp0/2636      | NA                      | R01_cb8564_c73047/flp0/2636      |
| R01_cb8564_c88399/flp0/3343      | NA                       | NA                               | NA                      | R01_cb8564_c88399/flp0/3343      |
| R01_cb16106_c2/flp0/869          | NA                       | R01_cb16106_c2/flp0/869          | NA                      | R01_cb16106_c2/flp0/869          |
| R01_cb17577_c0/flp0/1621         | NA                       | NA                               | NA                      | R01_cb17577_c0/flp0/1621         |
| R01_cb5127_c9/flp0/2886          | NA                       | R01_cb5127_c9/flp0/2886          | NA                      | NA                               |

|                              |                              |                              |                              |                              |
|------------------------------|------------------------------|------------------------------|------------------------------|------------------------------|
| R01_cb8564_c2719/f1p0/3200   | R01_cb8564_c2719/f1p0/3200   | R01_cb8564_c2719/f1p0/3200   | NA                           | NA                           |
| R01_cb8564_c120225/f1p1/2746 | NA                           | R01_cb8564_c120225/f1p1/2746 | NA                           | NA                           |
| R01_cb8564_c83233/f1p0/2747  | NA                           | R01_cb8564_c83233/f1p0/2747  | NA                           | NA                           |
| R01_cb5297_c5/f1p0/1689      | NA                           | R01_cb5297_c5/f1p0/1689      | NA                           | NA                           |
| R01_cb17987_c0/f3p0/1138     | NA                           | NA                           | NA                           | R01_cb17987_c0/f3p0/1138     |
| R01_cb10983_c2/f1p0/1018     | NA                           | NA                           | NA                           | R01_cb10983_c2/f1p0/1018     |
| R01_cb8564_c116417/f1p0/2093 | R01_cb8564_c116417/f1p0/2093 | R01_cb8564_c116417/f1p0/2093 | R01_cb8564_c116417/f1p0/2093 | R01_cb8564_c116417/f1p0/2093 |
| R01_cb6624_c2/f1p0/3013      | NA                           | R01_cb6624_c2/f1p0/3013      | NA                           | R01_cb6624_c2/f1p0/3013      |
| R01_cb10792_c1/f1p0/2174     | NA                           | R01_cb10792_c1/f1p0/2174     | NA                           | R01_cb10792_c1/f1p0/2174     |
| R01_cb14502_c6/f1p0/946      | NA                           | R01_cb14502_c6/f1p0/946      | NA                           | R01_cb14502_c6/f1p0/946      |
| R01_cb8564_c107842/f3p0/2058 | R01_cb8564_c107842/f3p0/2058 | R01_cb8564_c107842/f3p0/2058 | R01_cb8564_c107842/f3p0/2058 | R01_cb8564_c107842/f3p0/2058 |
| R01_cb10292_c5/f1p1/1146     | NA                           | NA                           | NA                           | R01_cb10292_c5/f1p1/1146     |
| R01_cb5190_c7/f1p2/2292      | NA                           | R01_cb5190_c7/f1p2/2292      | NA                           | R01_cb5190_c7/f1p2/2292      |
| R01_cb18456_c7183/f1p0/513   | R01_cb18456_c7183/f1p0/513   | R01_cb18456_c7183/f1p0/513   | R01_cb18456_c7183/f1p0/513   | R01_cb18456_c7183/f1p0/513   |
| R01_cb14078_c1/f1p0/538      | NA                           | R01_cb14078_c1/f1p0/538      | NA                           | NA                           |
| R01_cb5900_c42/f1p0/2348     | NA                           | NA                           | R01_cb5900_c42/f1p0/2348     | R01_cb5900_c42/f1p0/2348     |
| R01_cb8564_c71135/f1p0/2328  | NA                           | R01_cb8564_c71135/f1p0/2328  | NA                           | NA                           |
| R01_cb15751_c1/f1p0/1256     | R01_cb15751_c1/f1p0/1256     | R01_cb15751_c1/f1p0/1256     | R01_cb15751_c1/f1p0/1256     | R01_cb15751_c1/f1p0/1256     |
| R01_cb16524_c0/f5p0/468      | R01_cb16524_c0/f5p0/468      | NA                           | NA                           | R01_cb16524_c0/f5p0/468      |
| R01_cb8564_c4629/f1p0/2950   | NA                           | R01_cb8564_c4629/f1p0/2950   | R01_cb8564_c4629/f1p0/2950   | R01_cb8564_c4629/f1p0/2950   |
| R01_cb955_c62/f1p0/922       | NA                           | R01_cb955_c62/f1p0/922       | NA                           | NA                           |
| R01_cb130_c1/f1p0/4953       | NA                           | R01_cb130_c1/f1p0/4953       | NA                           | NA                           |
| R01_cb17054_c0/f2p0/453      | R01_cb17054_c0/f2p0/453      | R01_cb17054_c0/f2p0/453      | R01_cb17054_c0/f2p0/453      | R01_cb17054_c0/f2p0/453      |

|                              |                                  |                             |                             |                              |
|------------------------------|----------------------------------|-----------------------------|-----------------------------|------------------------------|
| R01_cb18456_c7496/flp0/1356  | R01_cb18456_c7496/flp0/1356<br>6 | R01_cb18456_c7496/flp0/1356 | R01_cb18456_c7496/flp0/1356 | R01_cb18456_c7496/flp0/1356  |
| R01_cb10472_c0/flp0/542      | NA                               | R01_cb10472_c0/flp0/542     | R01_cb10472_c0/flp0/542     | R01_cb10472_c0/flp0/542      |
| R01_cb5782_c15/flp0/1333     | NA                               | R01_cb5782_c15/flp0/1333    | NA                          | NA                           |
| R01_cb9376_c1/flp0/3273      | NA                               | R01_cb9376_c1/flp0/3273     | R01_cb9376_c1/flp0/3273     | R01_cb9376_c1/flp0/3273      |
| R01_cb5017_c1/flp0/3198      | NA                               | NA                          | NA                          | R01_cb5017_c1/flp0/3198      |
| R01_cb13512_c1/flp0/1038     | NA                               | NA                          | NA                          | R01_cb13512_c1/flp0/1038     |
| R01_cb11713_c1/flp0/1896     | NA                               | R01_cb11713_c1/flp0/1896    | NA                          | R01_cb11713_c1/flp0/1896     |
| R01_cb17721_c3/flp0/1668     | NA                               | R01_cb17721_c3/flp0/1668    | NA                          | NA                           |
| R01_cb9036_c4/flp0/2432      | NA                               | R01_cb9036_c4/flp0/2432     | NA                          | NA                           |
| R01_cb10229_c4/flp0/2704     | NA                               | R01_cb10229_c4/flp0/2704    | NA                          | NA                           |
| R01_cb16505_c1/flp0/573      | NA                               | R01_cb16505_c1/flp0/573     | R01_cb16505_c1/flp0/573     | NA                           |
| R01_cb6976_c4/flp0/2088      | NA                               | R01_cb6976_c4/flp0/2088     | NA                          | NA                           |
| R01_cb34_c2/flp0/2495        | NA                               | NA                          | NA                          | R01_cb34_c2/flp0/2495        |
| R01_cb13118_c2/flp0/5011     | NA                               | R01_cb13118_c2/flp0/5011    | NA                          | NA                           |
| R01_cb8564_c109476/f3p1/2122 | NA                               | NA                          | NA                          | R01_cb8564_c109476/f3p1/2122 |
| R01_cb18456_c6420/flp0/461   | NA                               | NA                          | R01_cb18456_c6420/flp0/461  | R01_cb18456_c6420/flp0/461   |
| R01_cb16689_c1/flp0/799      | R01_cb16689_c1/flp0/799          | NA                          | NA                          | R01_cb16689_c1/flp0/799      |
| R01_cb8564_c77269/flp0/3758  | NA                               | NA                          | NA                          | R01_cb8564_c77269/flp0/3758  |
| R01_cb13711_c2/flp0/1069     | NA                               | R01_cb13711_c2/flp0/1069    | NA                          | NA                           |
| R01_cb10849_c5/flp0/491      | R01_cb10849_c5/flp0/491          | R01_cb10849_c5/flp0/491     | NA                          | R01_cb10849_c5/flp0/491      |
| R01_cb15118_c4/f2p1/430      | NA                               | NA                          | NA                          | R01_cb15118_c4/f2p1/430      |
| R01_cb11629_c0/flp0/1315     | NA                               | NA                          | NA                          | R01_cb11629_c0/flp0/1315     |
| R01_cb13876_c2/f5p0/1596     | NA                               | NA                          | NA                          | R01_cb13876_c2/f5p0/1596     |
| R01_cb2826_c8/flp0/3752      | NA                               | R01_cb2826_c8/flp0/3752     | NA                          | NA                           |

|                                  |                           |                                  |                                  |                             |
|----------------------------------|---------------------------|----------------------------------|----------------------------------|-----------------------------|
| R01_cb4511_c0/flp0/3341          | NA                        | R01_cb4511_c0/flp0/3341          | NA                               | NA                          |
| R01_cb10448_c3/flp0/1403         | R01_cb10448_c3/flp0/1403  | R01_cb10448_c3/flp0/1403         | NA                               | NA                          |
| R01_cb7110_c2/flp0/3690          | NA                        | NA                               | R01_cb7110_c2/flp0/3690          | NA                          |
| R01_cb13191_c1/flp0/1268         | NA                        | NA                               | NA                               | R01_cb13191_c1/flp0/1268    |
| R01_cb8564_c121608/flp0/348<br>4 | NA                        | R01_cb8564_c121608/flp0/348<br>4 | R01_cb8564_c121608/flp0/348<br>4 | NA                          |
| R01_cb14433_c2/flp0/1612         | NA                        | NA                               | NA                               | R01_cb14433_c2/flp0/1612    |
| R01_cb5875_c1/flp0/2860          | R01_cb5875_c1/flp0/2860   | R01_cb5875_c1/flp0/2860          | R01_cb5875_c1/flp0/2860          | R01_cb5875_c1/flp0/2860     |
| R01_cb14343_c1/flp0/570          | NA                        | R01_cb14343_c1/flp0/570          | NA                               | NA                          |
| R01_cb5743_c26/flp0/1137         | NA                        | R01_cb5743_c26/flp0/1137         | NA                               | NA                          |
| R01_cb17147_c1/flp0/1466         | NA                        | R01_cb17147_c1/flp0/1466         | NA                               | NA                          |
| R01_cb2161_c6/flp0/3650          | NA                        | NA                               | NA                               | R01_cb2161_c6/flp0/3650     |
| R01_cb352_c4/flp0/1968           | NA                        | NA                               | NA                               | R01_cb352_c4/flp0/1968      |
| R01_cb9532_c5/flp0/893           | NA                        | R01_cb9532_c5/flp0/893           | R01_cb9532_c5/flp0/893           | R01_cb9532_c5/flp0/893      |
| R01_cb18456_c6532/flp0/594       | NA                        | R01_cb18456_c6532/flp0/594       | R01_cb18456_c6532/flp0/594       | NA                          |
| R01_cb13485_c1/flp0/669          | NA                        | R01_cb13485_c1/flp0/669          | NA                               | NA                          |
| R01_cb2088_c1/flp0/4057          | NA                        | NA                               | NA                               | R01_cb2088_c1/flp0/4057     |
| R01_cb16555_c3/flp0/508          | NA                        | NA                               | NA                               | R01_cb16555_c3/flp0/508     |
| R01_cb2756_c2/flp0/3820          | NA                        | NA                               | NA                               | R01_cb2756_c2/flp0/3820     |
| R01_cb12803_c1/flp0/1194         | NA                        | NA                               | NA                               | R01_cb12803_c1/flp0/1194    |
| R01_cb15651_c1/f3p0/782          | NA                        | R01_cb15651_c1/f3p0/782          | NA                               | NA                          |
| R01_cb12321_c867/flp0/343        | R01_cb12321_c867/flp0/343 | R01_cb12321_c867/flp0/343        | NA                               | NA                          |
| R01_cb8564_c88373/flp0/2526      | NA                        | R01_cb8564_c88373/flp0/2526      | R01_cb8564_c88373/flp0/2526      | R01_cb8564_c88373/flp0/2526 |
| R01_cb10979_c4/flp0/1409         | NA                        | R01_cb10979_c4/flp0/1409         | NA                               | NA                          |
| R01_cb7221_c3/f3p3/2658          | NA                        | NA                               | NA                               | R01_cb7221_c3/f3p3/2658     |
| R01_cb6274_c8/flp0/2262          | NA                        | NA                               | NA                               | R01_cb6274_c8/flp0/2262     |

|                              |                             |                              |                             |                              |
|------------------------------|-----------------------------|------------------------------|-----------------------------|------------------------------|
| R01_cb2213_c1/flp0/4372      | NA                          | R01_cb2213_c1/flp0/4372      | NA                          | R01_cb2213_c1/flp0/4372      |
| R01_cb1610_c4/flp0/2665      | NA                          | NA                           | NA                          | R01_cb1610_c4/flp0/2665      |
| R01_cb11257_c0/f2p0/730      | NA                          | NA                           | NA                          | R01_cb11257_c0/f2p0/730      |
| R01_cb14937_c6/flp0/1051     | NA                          | NA                           | R01_cb14937_c6/flp0/1051    | R01_cb14937_c6/flp0/1051     |
| R01_cb17756_c32/flp0/1590    | R01_cb17756_c32/flp0/1590   | R01_cb17756_c32/flp0/1590    | R01_cb17756_c32/flp0/1590   | R01_cb17756_c32/flp0/1590    |
| R01_cb7243_c2/flp0/2633      | NA                          | NA                           | NA                          | R01_cb7243_c2/flp0/2633      |
| R01_cb18061_c3/flp0/1047     | NA                          | R01_cb18061_c3/flp0/1047     | NA                          | NA                           |
| R01_cb15251_c3/flp0/1683     | NA                          | NA                           | NA                          | R01_cb15251_c3/flp0/1683     |
| R01_cb18456_c7147/flp0/1822  | NA                          | R01_cb18456_c7147/flp0/1822  | R01_cb18456_c7147/flp0/1822 | R01_cb18456_c7147/flp0/1822  |
| R01_cb6406_c51/flp0/2760     | NA                          | R01_cb6406_c51/flp0/2760     | NA                          | NA                           |
| R01_cb13097_c3/flp0/332      | R01_cb13097_c3/flp0/332     | R01_cb13097_c3/flp0/332      | R01_cb13097_c3/flp0/332     | R01_cb13097_c3/flp0/332      |
| R01_cb13230_c3/flp0/1512     | NA                          | R01_cb13230_c3/flp0/1512     | NA                          | NA                           |
| R01_cb4321_c10/flp0/504      | R01_cb4321_c10/flp0/504     | R01_cb4321_c10/flp0/504      | R01_cb4321_c10/flp0/504     | R01_cb4321_c10/flp0/504      |
| R01_cb693_c13/flp0/2877      | NA                          | NA                           | NA                          | R01_cb693_c13/flp0/2877      |
| R01_cb4997_c6/flp0/2419      | NA                          | NA                           | NA                          | R01_cb4997_c6/flp0/2419      |
| R01_cb14480_c6/flp0/689      | R01_cb14480_c6/flp0/689     | R01_cb14480_c6/flp0/689      | R01_cb14480_c6/flp0/689     | R01_cb14480_c6/flp0/689      |
| R01_cb3139_c15/flp0/490      | R01_cb3139_c15/flp0/490     | R01_cb3139_c15/flp0/490      | R01_cb3139_c15/flp0/490     | R01_cb3139_c15/flp0/490      |
| R01_cb8564_c69032/f2p0/3113  | R01_cb8564_c69032/f2p0/3113 | R01_cb8564_c69032/f2p0/3113  | NA                          | R01_cb8564_c69032/f2p0/3113  |
| R01_cb8564_c107839/f2p1/2411 | NA                          | R01_cb8564_c107839/f2p1/2411 | NA                          | R01_cb8564_c107839/f2p1/2411 |
| R01_cb8564_c122058/flp1/1944 | NA                          | R01_cb8564_c122058/flp1/1944 | NA                          | NA                           |
| R01_cb9588_c6/flp1/1687      | R01_cb9588_c6/flp1/1687     | R01_cb9588_c6/flp1/1687      | R01_cb9588_c6/flp1/1687     | R01_cb9588_c6/flp1/1687      |
| R01_cb5183_c33/flp0/2800     | NA                          | NA                           | NA                          | R01_cb5183_c33/flp0/2800     |
| R01_cb218_c14/flp0/4667      | NA                          | NA                           | NA                          | R01_cb218_c14/flp0/4667      |



|                              |                             |                              |                              |                              |
|------------------------------|-----------------------------|------------------------------|------------------------------|------------------------------|
| R01_cb13699_c0/flp0/1350     | NA                          | NA                           | NA                           | R01_cb13699_c0/flp0/1350     |
| R01_cb13524_c3/flp0/1102     | NA                          | R01_cb13524_c3/flp0/1102     | NA                           | NA                           |
| R01_cb8564_c109822/f2p1/4639 | NA                          | R01_cb8564_c109822/f2p1/4639 | NA                           | NA                           |
| R01_cb8564_c88619/flp0/4510  | R01_cb8564_c88619/flp0/4510 | R01_cb8564_c88619/flp0/4510  | R01_cb8564_c88619/flp0/4510  | NA                           |
| R01_cb1163_c77/flp0/581      | R01_cb1163_c77/flp0/581     | R01_cb1163_c77/flp0/581      | NA                           | R01_cb1163_c77/flp0/581      |
| R01_cb2104_c4/flp0/4051      | NA                          | R01_cb2104_c4/flp0/4051      | R01_cb2104_c4/flp0/4051      | R01_cb2104_c4/flp0/4051      |
| R01_cb9334_c5/flp0/1137      | NA                          | R01_cb9334_c5/flp0/1137      | NA                           | NA                           |
| R01_cb6127_c4/flp0/666       | NA                          | R01_cb6127_c4/flp0/666       | NA                           | NA                           |
| R01_cb1581_c4/f2p0/3773      | R01_cb1581_c4/f2p0/3773     | R01_cb1581_c4/f2p0/3773      | NA                           | NA                           |
| R01_cb8564_c83438/flp1/3175  | NA                          | NA                           | NA                           | R01_cb8564_c83438/flp1/3175  |
| R01_cb18359_c0/flp0/1599     | NA                          | NA                           | NA                           | R01_cb18359_c0/flp0/1599     |
| R01_cb10880_c10/f9p2/794     | NA                          | NA                           | NA                           | R01_cb10880_c10/f9p2/794     |
| R01_cb10567_c3/flp0/1009     | R01_cb10567_c3/flp0/1009    | R01_cb10567_c3/flp0/1009     | R01_cb10567_c3/flp0/1009     | R01_cb10567_c3/flp0/1009     |
| R01_cb13203_c4/flp0/2433     | NA                          | R01_cb13203_c4/flp0/2433     | NA                           | R01_cb13203_c4/flp0/2433     |
| R01_cb18456_c3758/flp0/937   | R01_cb18456_c3758/flp0/937  | R01_cb18456_c3758/flp0/937   | R01_cb18456_c3758/flp0/937   | R01_cb18456_c3758/flp0/937   |
| R01_cb12737_c0/fl1p0/602     | NA                          | R01_cb12737_c0/fl1p0/602     | NA                           | NA                           |
| R01_cb7795_c2/flp0/3536      | NA                          | NA                           | NA                           | R01_cb7795_c2/flp0/3536      |
| R01_cb1376_c7/flp0/2863      | NA                          | NA                           | NA                           | R01_cb1376_c7/flp0/2863      |
| R01_cb7945_c2/flp1/4130      | NA                          | R01_cb7945_c2/flp1/4130      | NA                           | R01_cb7945_c2/flp1/4130      |
| R01_cb8564_c120860/flp0/2957 | NA                          | R01_cb8564_c120860/flp0/2957 | NA                           | NA                           |
| R01_cb8564_c184312/flp0/2279 | NA                          | R01_cb8564_c184312/flp0/2279 | R01_cb8564_c184312/flp0/2279 | R01_cb8564_c184312/flp0/2279 |
| R01_cb7208_c1/flp0/2672      | NA                          | R01_cb7208_c1/flp0/2672      | NA                           | NA                           |

|                             |                             |                             |                             |                             |
|-----------------------------|-----------------------------|-----------------------------|-----------------------------|-----------------------------|
| R01_cb2765_c1/flp0/3808     | NA                          | NA                          | NA                          | R01_cb2765_c1/flp0/3808     |
| R01_cb17690_c1/flp0/1884    | R01_cb17690_c1/flp0/1884    | R01_cb17690_c1/flp0/1884    | R01_cb17690_c1/flp0/1884    | R01_cb17690_c1/flp0/1884    |
| R01_cb15740_c1/flp0/663     | NA                          | R01_cb15740_c1/flp0/663     | NA                          | NA                          |
| R01_cb11173_c4/flp0/595     | NA                          | R01_cb11173_c4/flp0/595     | NA                          | NA                          |
| R01_cb8564_c90196/flp0/2276 | NA                          | NA                          | NA                          | R01_cb8564_c90196/flp0/2276 |
| R01_cb4147_c14/flp0/3211    | NA                          | R01_cb4147_c14/flp0/3211    | NA                          | NA                          |
| R01_cb2875_c22/flp0/3329    | NA                          | NA                          | NA                          | R01_cb2875_c22/flp0/3329    |
| R01_cb10600_c0/flp0/940     | NA                          | NA                          | NA                          | R01_cb10600_c0/flp0/940     |
| R01_cb2072_c38/flp0/1966    | NA                          | NA                          | NA                          | R01_cb2072_c38/flp0/1966    |
| R01_cb12332_c7/flp0/979     | NA                          | R01_cb12332_c7/flp0/979     | NA                          | NA                          |
| R01_cb18116_c0/flp0/1574    | NA                          | R01_cb18116_c0/flp0/1574    | NA                          | NA                          |
| R01_cb10579_c4/flp0/1005    | NA                          | NA                          | NA                          | R01_cb10579_c4/flp0/1005    |
| R01_cb16886_c0/f3p0/1312    | NA                          | NA                          | R01_cb16886_c0/f3p0/1312    | R01_cb16886_c0/f3p0/1312    |
| R01_cb3307_c18/flp0/3518    | NA                          | R01_cb3307_c18/flp0/3518    | NA                          | NA                          |
| R01_cb9759_c4/flp1/3348     | NA                          | NA                          | NA                          | R01_cb9759_c4/flp1/3348     |
| R01_cb13193_c8/flp0/605     | R01_cb13193_c8/flp0/605     | R01_cb13193_c8/flp0/605     | R01_cb13193_c8/flp0/605     | R01_cb13193_c8/flp0/605     |
| R01_cb8978_c1/flp0/2217     | R01_cb8978_c1/flp0/2217     | R01_cb8978_c1/flp0/2217     | NA                          | NA                          |
| R01_cb11002_c1/f2p0/1589    | NA                          | NA                          | NA                          | R01_cb11002_c1/f2p0/1589    |
| R01_cb12444_c50/flp0/650    | R01_cb12444_c50/flp0/650    | R01_cb12444_c50/flp0/650    | R01_cb12444_c50/flp0/650    | R01_cb12444_c50/flp0/650    |
| R01_cb8564_c85368/flp0/2518 | R01_cb8564_c85368/flp0/2518 | R01_cb8564_c85368/flp0/2518 | R01_cb8564_c85368/flp0/2518 | R01_cb8564_c85368/flp0/2518 |
| R01_cb18409_c93/flp0/756    | R01_cb18409_c93/flp0/756    | R01_cb18409_c93/flp0/756    | R01_cb18409_c93/flp0/756    | R01_cb18409_c93/flp0/756    |
| R01_cb15190_c2/flp0/982     | NA                          | R01_cb15190_c2/flp0/982     | NA                          | NA                          |
| R01_cb9341_c20/flp0/2938    | NA                          | R01_cb9341_c20/flp0/2938    | R01_cb9341_c20/flp0/2938    | NA                          |
| R01_cb9029_c0/flp0/2206     | NA                          | NA                          | NA                          | R01_cb9029_c0/flp0/2206     |
| R01_cb12003_c33/flp0/1360   | NA                          | R01_cb12003_c33/flp0/1360   | NA                          | NA                          |

|                             |                         |                             |                             |                             |
|-----------------------------|-------------------------|-----------------------------|-----------------------------|-----------------------------|
| R01_cb3169_c3/flp0/2107     | NA                      | NA                          | NA                          | R01_cb3169_c3/flp0/2107     |
| R01_cb8564_c90923/flp1/2586 | NA                      | R01_cb8564_c90923/flp1/2586 | R01_cb8564_c90923/flp1/2586 | NA                          |
| R01_cb293_c8/flp0/4316      | NA                      | NA                          | NA                          | R01_cb293_c8/flp0/4316      |
| R01_cb8564_c4978/f2p0/2100  | NA                      | R01_cb8564_c4978/f2p0/2100  | NA                          | NA                          |
| R01_cb14619_c7/flp0/5856    | NA                      | R01_cb14619_c7/flp0/5856    | NA                          | NA                          |
| R01_cb11050_c3/flp0/2668    | NA                      | R01_cb11050_c3/flp0/2668    | NA                          | NA                          |
| R01_cb12577_c11/flp2/909    | NA                      | NA                          | NA                          | R01_cb12577_c11/flp2/909    |
| R01_cb14960_c2/flp0/788     | NA                      | R01_cb14960_c2/flp0/788     | NA                          | NA                          |
| R01_cb8040_c15/flp0/1895    | NA                      | R01_cb8040_c15/flp0/1895    | NA                          | R01_cb8040_c15/flp0/1895    |
| R01_cb10634_c2/flp1/2846    | NA                      | R01_cb10634_c2/flp1/2846    | NA                          | NA                          |
| R01_cb5339_c4/flp0/2382     | NA                      | NA                          | NA                          | R01_cb5339_c4/flp0/2382     |
| R01_cb8564_c77472/flp0/3454 | NA                      | NA                          | NA                          | R01_cb8564_c77472/flp0/3454 |
| R01_cb9643_c2/flp0/1659     | NA                      | R01_cb9643_c2/flp0/1659     | R01_cb9643_c2/flp0/1659     | NA                          |
| R01_cb8173_c4/flp3/2003     | NA                      | R01_cb8173_c4/flp3/2003     | R01_cb8173_c4/flp3/2003     | NA                          |
| R01_cb10118_c2/flp0/616     | NA                      | R01_cb10118_c2/flp0/616     | NA                          | R01_cb10118_c2/flp0/616     |
| R01_cb8564_c1644/flp0/2393  | NA                      | NA                          | R01_cb8564_c1644/flp0/2393  | R01_cb8564_c1644/flp0/2393  |
| R01_cb3432_c7/flp1/718      | NA                      | R01_cb3432_c7/flp1/718      | NA                          | NA                          |
| R01_cb8564_c25049/flp0/3150 | NA                      | R01_cb8564_c25049/flp0/3150 | NA                          | NA                          |
| R01_cb13761_c8/flp0/717     | R01_cb13761_c8/flp0/717 | R01_cb13761_c8/flp0/717     | R01_cb13761_c8/flp0/717     | R01_cb13761_c8/flp0/717     |
| R01_cb6384_c0/f2p0/2878     | NA                      | R01_cb6384_c0/f2p0/2878     | R01_cb6384_c0/f2p0/2878     | R01_cb6384_c0/f2p0/2878     |
| R01_cb289_c24/flp0/1250     | NA                      | R01_cb289_c24/flp0/1250     | NA                          | R01_cb289_c24/flp0/1250     |
| R01_cb9252_c2/flp0/2527     | NA                      | R01_cb9252_c2/flp0/2527     | R01_cb9252_c2/flp0/2527     | R01_cb9252_c2/flp0/2527     |
| R01_cb16396_c2/flp0/1321    | NA                      | R01_cb16396_c2/flp0/1321    | NA                          | NA                          |
| R01_cb9317_c10/flp1/1720    | NA                      | R01_cb9317_c10/flp1/1720    | NA                          | NA                          |
| R01_cb10697_c6/flp0/820     | NA                      | R01_cb10697_c6/flp0/820     | NA                          | NA                          |
| R01_cb8564_c15960/flp0/3558 | NA                      | NA                          | R01_cb8564_c15960/flp0/3558 | R01_cb8564_c15960/flp0/3558 |

|                             |                             |                             |                             |                             |
|-----------------------------|-----------------------------|-----------------------------|-----------------------------|-----------------------------|
| R01_cb27_c0/f3p0/1066       | NA                          | NA                          | NA                          | R01_cb27_c0/f3p0/1066       |
| R01_cb17761_c2/f2p0/753     | NA                          | NA                          | NA                          | R01_cb17761_c2/f2p0/753     |
| R01_cb13433_c104/f1p0/615   | NA                          | R01_cb13433_c104/f1p0/615   | NA                          | NA                          |
| R01_cb17260_c0/f1p0/473     | R01_cb17260_c0/f1p0/473     | R01_cb17260_c0/f1p0/473     | R01_cb17260_c0/f1p0/473     | R01_cb17260_c0/f1p0/473     |
| R01_cb88_c25/f1p0/2551      | NA                          | NA                          | NA                          | R01_cb88_c25/f1p0/2551      |
| R01_cb16474_c0/f2p0/1518    | NA                          | NA                          | NA                          | R01_cb16474_c0/f2p0/1518    |
| R01_cb10024_c345/f1p3/778   | NA                          | NA                          | R01_cb10024_c345/f1p3/778   | NA                          |
| R01_cb14223_c2/f3p0/399     | R01_cb14223_c2/f3p0/399     | R01_cb14223_c2/f3p0/399     | R01_cb14223_c2/f3p0/399     | R01_cb14223_c2/f3p0/399     |
| R01_cb14196_c0/f1p0/1220    | NA                          | R01_cb14196_c0/f1p0/1220    | R01_cb14196_c0/f1p0/1220    | R01_cb14196_c0/f1p0/1220    |
| R01_cb11450_c0/f1p0/1165    | NA                          | NA                          | NA                          | R01_cb11450_c0/f1p0/1165    |
| R01_cb11771_c1/f1p0/3223    | NA                          | R01_cb11771_c1/f1p0/3223    | R01_cb11771_c1/f1p0/3223    | R01_cb11771_c1/f1p0/3223    |
| R01_cb6885_c0/f4p1/1919     | NA                          | NA                          | NA                          | R01_cb6885_c0/f4p1/1919     |
| R01_cb8564_c42955/f1p0/4148 | R01_cb8564_c42955/f1p0/4148 | R01_cb8564_c42955/f1p0/4148 | R01_cb8564_c42955/f1p0/4148 | R01_cb8564_c42955/f1p0/4148 |
| R01_cb13259_c4/f1p0/368     | R01_cb13259_c4/f1p0/368     | R01_cb13259_c4/f1p0/368     | R01_cb13259_c4/f1p0/368     | NA                          |
| R01_cb2472_c2/f1p0/3916     | NA                          | NA                          | R01_cb2472_c2/f1p0/3916     | NA                          |
| R01_cb226_c8/f1p0/5018      | NA                          | NA                          | NA                          | R01_cb226_c8/f1p0/5018      |
| R01_cb3516_c4/f1p0/2693     | NA                          | NA                          | NA                          | R01_cb3516_c4/f1p0/2693     |
| R01_cb6845_c38/f13p2/2516   | NA                          | NA                          | NA                          | R01_cb6845_c38/f13p2/2516   |
| R01_cb12740_c6/f2p0/479     | R01_cb12740_c6/f2p0/479     | R01_cb12740_c6/f2p0/479     | NA                          | R01_cb12740_c6/f2p0/479     |
| R01_cb6297_c3/f2p0/3335     | NA                          | NA                          | R01_cb6297_c3/f2p0/3335     | NA                          |
| R01_cb18456_c7578/f1p0/744  | R01_cb18456_c7578/f1p0/744  | R01_cb18456_c7578/f1p0/744  | R01_cb18456_c7578/f1p0/744  | R01_cb18456_c7578/f1p0/744  |
| R01_cb893_c4/f1p0/2859      | NA                          | NA                          | NA                          | R01_cb893_c4/f1p0/2859      |
| R01_cb8564_c88984/f1p0/3187 | NA                          | R01_cb8564_c88984/f1p0/3187 | NA                          | R01_cb8564_c88984/f1p0/3187 |
| R01_cb18704_c1/f1p0/720     | R01_cb18704_c1/f1p0/720     | R01_cb18704_c1/f1p0/720     | R01_cb18704_c1/f1p0/720     | NA                          |
| R01_cb13903_c2/f1p0/943     | NA                          | R01_cb13903_c2/f1p0/943     | NA                          | NA                          |

|                             |                         |                             |                          |                             |
|-----------------------------|-------------------------|-----------------------------|--------------------------|-----------------------------|
| R01_cb11321_c1/flp0/2453    | NA                      | NA                          | NA                       | R01_cb11321_c1/flp0/2453    |
| R01_cb5412_c3/flp0/2987     | NA                      | NA                          | NA                       | R01_cb5412_c3/flp0/2987     |
| R01_cb9237_c11/flp0/1417    | NA                      | R01_cb9237_c11/flp0/1417    | NA                       | NA                          |
| R01_cb18456_c3611/flp4/1109 | NA                      | R01_cb18456_c3611/flp4/1109 | NA                       | NA                          |
| R01_cb8564_c87992/flp0/4208 | NA                      | R01_cb8564_c87992/flp0/4208 | NA                       | NA                          |
| R01_cb8564_c85251/flp0/2819 | NA                      | R01_cb8564_c85251/flp0/2819 | NA                       | R01_cb8564_c85251/flp0/2819 |
| R01_cb9658_c1/f2p0/1942     | NA                      | NA                          | NA                       | R01_cb9658_c1/f2p0/1942     |
| R01_cb3563_c2/flp0/3312     | NA                      | R01_cb3563_c2/flp0/3312     | NA                       | R01_cb3563_c2/flp0/3312     |
| R01_cb15469_c7/flp0/1338    | NA                      | R01_cb15469_c7/flp0/1338    | NA                       | NA                          |
| R01_cb2314_c5/flp0/3736     | NA                      | R01_cb2314_c5/flp0/3736     | NA                       | NA                          |
| R01_cb1031_c3/flp0/6376     | NA                      | NA                          | NA                       | R01_cb1031_c3/flp0/6376     |
| R01_cb13761_c1/flp0/558     | R01_cb13761_c1/flp0/558 | R01_cb13761_c1/flp0/558     | R01_cb13761_c1/flp0/558  | R01_cb13761_c1/flp0/558     |
| R01_cb5158_c5/flp0/1406     | NA                      | NA                          | NA                       | R01_cb5158_c5/flp0/1406     |
| R01_cb18021_c0/f2p0/643     | NA                      | R01_cb18021_c0/f2p0/643     | R01_cb18021_c0/f2p0/643  | R01_cb18021_c0/f2p0/643     |
| R01_cb1138_c46/flp0/716     | R01_cb1138_c46/flp0/716 | NA                          | R01_cb1138_c46/flp0/716  | R01_cb1138_c46/flp0/716     |
| R01_cb8564_c18520/f2p0/3299 | NA                      | NA                          | NA                       | R01_cb8564_c18520/f2p0/3299 |
| R01_cb6571_c2/flp0/2224     | NA                      | R01_cb6571_c2/flp0/2224     | NA                       | R01_cb6571_c2/flp0/2224     |
| R01_cb5234_c6/flp0/2095     | R01_cb5234_c6/flp0/2095 | R01_cb5234_c6/flp0/2095     | NA                       | R01_cb5234_c6/flp0/2095     |
| R01_cb11630_c2/flp0/1652    | NA                      | R01_cb11630_c2/flp0/1652    | R01_cb11630_c2/flp0/1652 | R01_cb11630_c2/flp0/1652    |
| R01_cb12485_c0/f2p0/1365    | NA                      | NA                          | NA                       | R01_cb12485_c0/f2p0/1365    |
| R01_cb16730_c1/flp0/539     | NA                      | R01_cb16730_c1/flp0/539     | NA                       | R01_cb16730_c1/flp0/539     |
| R01_cb8564_c76686/flp0/3709 | NA                      | NA                          | NA                       | R01_cb8564_c76686/flp0/3709 |
| R01_cb9975_c1/flp0/2600     | NA                      | NA                          | NA                       | R01_cb9975_c1/flp0/2600     |
| R01_cb8564_c3548/flp5/2797  | NA                      | R01_cb8564_c3548/flp5/2797  | NA                       | NA                          |
| R01_cb16913_c5/flp0/800     | NA                      | R01_cb16913_c5/flp0/800     | NA                       | NA                          |
| R01_cb10140_c2/flp0/2321    | NA                      | R01_cb10140_c2/flp0/2321    | NA                       | NA                          |

|                              |                             |                             |                             |                              |
|------------------------------|-----------------------------|-----------------------------|-----------------------------|------------------------------|
| R01_cb14542_c4/flp0/1085     | NA                          | NA                          | NA                          | R01_cb14542_c4/flp0/1085     |
| R01_cb3059_c1/flp0/2343      | NA                          | R01_cb3059_c1/flp0/2343     | NA                          | R01_cb3059_c1/flp0/2343      |
| R01_cb8564_c10623/flp0/3768  | NA                          | R01_cb8564_c10623/flp0/3768 | NA                          | NA                           |
| R01_cb10966_c0/flp0/1793     | NA                          | R01_cb10966_c0/flp0/1793    | R01_cb10966_c0/flp0/1793    | R01_cb10966_c0/flp0/1793     |
| R01_cb5219_c5/flp0/3091      | NA                          | R01_cb5219_c5/flp0/3091     | NA                          | NA                           |
| R01_cb8564_c121314/flp0/263  | R01_cb8564_c121314/flp0/263 | R01_cb8564_c121314/flp0/263 | R01_cb8564_c121314/flp0/263 | NA                           |
| R01_cb8789_c1/flp0/2302      | NA                          | NA                          | NA                          | R01_cb8789_c1/flp0/2302      |
| R01_cb8564_c114604/f3p0/2235 | NA                          | NA                          | NA                          | R01_cb8564_c114604/f3p0/2235 |
| R01_cb5062_c8/flp0/2633      | NA                          | R01_cb5062_c8/flp0/2633     | NA                          | NA                           |
| R01_cb5246_c1/flp0/2846      | R01_cb5246_c1/flp0/2846     | R01_cb5246_c1/flp0/2846     | R01_cb5246_c1/flp0/2846     | R01_cb5246_c1/flp0/2846      |
| R01_cb8564_c53792/flp0/4512  | R01_cb8564_c53792/flp0/4512 | R01_cb8564_c53792/flp0/4512 | NA                          | NA                           |
| R01_cb18192_c8/flp0/705      | NA                          | R01_cb18192_c8/flp0/705     | R01_cb18192_c8/flp0/705     | R01_cb18192_c8/flp0/705      |
| R01_cb6348_c9/flp0/1853      | NA                          | NA                          | NA                          | R01_cb6348_c9/flp0/1853      |
| R01_cb4715_c1/flp0/2611      | NA                          | NA                          | R01_cb4715_c1/flp0/2611     | R01_cb4715_c1/flp0/2611      |
| R01_cb17744_c7/f2p0/3036     | NA                          | R01_cb17744_c7/f2p0/3036    | NA                          | NA                           |
| R01_cb10822_c1/flp0/2352     | NA                          | R01_cb10822_c1/flp0/2352    | NA                          | NA                           |
| R01_cb8564_c126750/f2p1/2190 | NA                          | NA                          | NA                          | R01_cb8564_c126750/f2p1/2190 |
| R01_cb4249_c4/flp0/4246      | NA                          | R01_cb4249_c4/flp0/4246     | R01_cb4249_c4/flp0/4246     | NA                           |
| R01_cb194_c17/flp0/3170      | R01_cb194_c17/flp0/3170     | R01_cb194_c17/flp0/3170     | R01_cb194_c17/flp0/3170     | R01_cb194_c17/flp0/3170      |
| R01_cb8564_c20159/flp0/1939  | NA                          | R01_cb8564_c20159/flp0/1939 | NA                          | NA                           |
| R01_cb8564_c87147/flp0/3283  | NA                          | NA                          | NA                          | R01_cb8564_c87147/flp0/3283  |
| R01_cb18456_c6086/flp0/1076  | NA                          | NA                          | R01_cb18456_c6086/flp0/1076 | R01_cb18456_c6086/flp0/1076  |

|                             |                          |                             |                             |                             |
|-----------------------------|--------------------------|-----------------------------|-----------------------------|-----------------------------|
| R01_cb13884_c17/flp0/1021   | NA                       | NA                          | R01_cb13884_c17/flp0/1021   | R01_cb13884_c17/flp0/1021   |
| R01_cb3164_c1/flp0/3697     | NA                       | R01_cb3164_c1/flp0/3697     | NA                          | NA                          |
| R01_cb4233_c204/flp0/3424   | NA                       | R01_cb4233_c204/flp0/3424   | NA                          | NA                          |
| R01_cb454_c1/f3p0/2382      | NA                       | NA                          | NA                          | R01_cb454_c1/f3p0/2382      |
| R01_cb18265_c1/flp0/407     | NA                       | R01_cb18265_c1/flp0/407     | NA                          | R01_cb18265_c1/flp0/407     |
| R01_cb11682_c1/flp0/2157    | NA                       | NA                          | NA                          | R01_cb11682_c1/flp0/2157    |
| R01_cb2434_c3/flp0/3369     | NA                       | NA                          | NA                          | R01_cb2434_c3/flp0/3369     |
| R01_cb1224_c17/flp0/4295    | NA                       | NA                          | NA                          | R01_cb1224_c17/flp0/4295    |
| R01_cb2026_c2/flp0/3974     | R01_cb2026_c2/flp0/3974  | R01_cb2026_c2/flp0/3974     | R01_cb2026_c2/flp0/3974     | R01_cb2026_c2/flp0/3974     |
| R01_cb8564_c69487/f2p0/2258 | NA                       | R01_cb8564_c69487/f2p0/2258 | R01_cb8564_c69487/f2p0/2258 | R01_cb8564_c69487/f2p0/2258 |
| R01_cb5896_c157/flp0/3375   | NA                       | R01_cb5896_c157/flp0/3375   | R01_cb5896_c157/flp0/3375   | NA                          |
| R01_cb3563_c6/flp0/2153     | NA                       | NA                          | NA                          | R01_cb3563_c6/flp0/2153     |
| R01_cb8564_c1404/flp0/3610  | NA                       | R01_cb8564_c1404/flp0/3610  | R01_cb8564_c1404/flp0/3610  | R01_cb8564_c1404/flp0/3610  |
| R01_cb2770_c58/flp0/3220    | NA                       | R01_cb2770_c58/flp0/3220    | NA                          | NA                          |
| R01_cb4911_c4/flp0/2755     | NA                       | R01_cb4911_c4/flp0/2755     | NA                          | NA                          |
| R01_cb10406_c5/flp0/1620    | R01_cb10406_c5/flp0/1620 | R01_cb10406_c5/flp0/1620    | NA                          | NA                          |
| R01_cb12616_c0/flp1/1401    | NA                       | NA                          | NA                          | R01_cb12616_c0/flp1/1401    |
| R01_cb59_c4/flp1/2682       | NA                       | R01_cb59_c4/flp1/2682       | R01_cb59_c4/flp1/2682       | R01_cb59_c4/flp1/2682       |
| R01_cb18456_c6073/flp0/468  | NA                       | R01_cb18456_c6073/flp0/468  | NA                          | NA                          |
| R01_cb14639_c4/flp0/457     | R01_cb14639_c4/flp0/457  | R01_cb14639_c4/flp0/457     | NA                          | NA                          |
| R01_cb11685_c1/flp0/2910    | NA                       | R01_cb11685_c1/flp0/2910    | R01_cb11685_c1/flp0/2910    | R01_cb11685_c1/flp0/2910    |
| R01_cb12572_c9/flp0/808     | NA                       | NA                          | R01_cb12572_c9/flp0/808     | R01_cb12572_c9/flp0/808     |
| R01_cb8564_c130034/flp0/294 | NA                       | R01_cb8564_c130034/flp0/294 | NA                          | R01_cb8564_c130034/flp0/294 |
| 3                           |                          | 3                           |                             | 3                           |
| R01_cb8564_c83618/flp0/2660 | NA                       | R01_cb8564_c83618/flp0/2660 | R01_cb8564_c83618/flp0/2660 | NA                          |
| R01_cb10437_c1/flp0/854     | R01_cb10437_c1/flp0/854  | R01_cb10437_c1/flp0/854     | R01_cb10437_c1/flp0/854     | R01_cb10437_c1/flp0/854     |

|                              |                             |                              |                              |                              |
|------------------------------|-----------------------------|------------------------------|------------------------------|------------------------------|
| R01_cb4469_c7/flp0/3119      | NA                          | NA                           | NA                           | R01_cb4469_c7/flp0/3119      |
| R01_cb12288_c0/f4p0/598      | R01_cb12288_c0/f4p0/598     | R01_cb12288_c0/f4p0/598      | R01_cb12288_c0/f4p0/598      | R01_cb12288_c0/f4p0/598      |
| R01_cb9274_c27/flp0/2089     | NA                          | NA                           | NA                           | R01_cb9274_c27/flp0/2089     |
| R01_cb12152_c0/f3p1/867      | NA                          | NA                           | R01_cb12152_c0/f3p1/867      | R01_cb12152_c0/f3p1/867      |
| R01_cb7221_c2/f3p2/2669      | NA                          | NA                           | NA                           | R01_cb7221_c2/f3p2/2669      |
| R01_cb15952_c1/flp0/1351     | NA                          | NA                           | NA                           | R01_cb15952_c1/flp0/1351     |
| R01_cb9285_c0/flp0/2127      | NA                          | R01_cb9285_c0/flp0/2127      | NA                           | NA                           |
| R01_cb17231_c4/flp0/734      | NA                          | NA                           | NA                           | R01_cb17231_c4/flp0/734      |
| R01_cb18187_c0/f2p0/830      | NA                          | NA                           | NA                           | R01_cb18187_c0/f2p0/830      |
| R01_cb10375_c3/flp0/1643     | NA                          | NA                           | NA                           | R01_cb10375_c3/flp0/1643     |
| R01_cb17792_c0/flp0/1223     | NA                          | NA                           | NA                           | R01_cb17792_c0/flp0/1223     |
| R01_cb17271_c0/f2p0/634      | NA                          | R01_cb17271_c0/f2p0/634      | R01_cb17271_c0/f2p0/634      | R01_cb17271_c0/f2p0/634      |
| R01_cb9882_c3/flp0/1971      | R01_cb9882_c3/flp0/1971     | R01_cb9882_c3/flp0/1971      | NA                           | NA                           |
| R01_cb8564_c86833/flp0/3511  | R01_cb8564_c86833/flp0/3511 | R01_cb8564_c86833/flp0/3511  | R01_cb8564_c86833/flp0/3511  | R01_cb8564_c86833/flp0/3511  |
| R01_cb5246_c0/flp0/3012      | R01_cb5246_c0/flp0/3012     | R01_cb5246_c0/flp0/3012      | R01_cb5246_c0/flp0/3012      | R01_cb5246_c0/flp0/3012      |
| R01_cb8564_c78185/flp0/2766  | NA                          | R01_cb8564_c78185/flp0/2766  | R01_cb8564_c78185/flp0/2766  | R01_cb8564_c78185/flp0/2766  |
| R01_cb17132_c1/flp0/685      | NA                          | NA                           | R01_cb17132_c1/flp0/685      | NA                           |
| R01_cb2159_c2/flp0/3833      | NA                          | R01_cb2159_c2/flp0/3833      | NA                           | NA                           |
| R01_cb13021_c1/f3p0/501      | R01_cb13021_c1/f3p0/501     | R01_cb13021_c1/f3p0/501      | NA                           | NA                           |
| R01_cb8564_c119207/flp0/2465 | NA                          | R01_cb8564_c119207/flp0/2465 | R01_cb8564_c119207/flp0/2465 | R01_cb8564_c119207/flp0/2465 |
| R01_cb14019_c4/flp0/1553     | NA                          | R01_cb14019_c4/flp0/1553     | R01_cb14019_c4/flp0/1553     | R01_cb14019_c4/flp0/1553     |
| R01_cb10229_c2/flp0/1728     | R01_cb10229_c2/flp0/1728    | R01_cb10229_c2/flp0/1728     | NA                           | R01_cb10229_c2/flp0/1728     |
| R01_cb18456_c7581/flp0/1653  | NA                          | R01_cb18456_c7581/flp0/1653  | NA                           | NA                           |
| R01_cb16856_c3/flp0/1170     | NA                          | NA                           | NA                           | R01_cb16856_c3/flp0/1170     |



|                              |                          |                           |                              |                              |
|------------------------------|--------------------------|---------------------------|------------------------------|------------------------------|
| R01_cb218_c1/f5p1/4661       | NA                       | NA                        | NA                           | R01_cb218_c1/f5p1/4661       |
| R01_cb14307_c1/f2p0/1592     | NA                       | R01_cb14307_c1/f2p0/1592  | NA                           | NA                           |
| R01_cb8564_c37464/f1p0/2862  | NA                       | NA                        | NA                           | R01_cb8564_c37464/f1p0/2862  |
| R01_cb11558_c1/f1p0/4620     | R01_cb11558_c1/f1p0/4620 | R01_cb11558_c1/f1p0/4620  | R01_cb11558_c1/f1p0/4620     | R01_cb11558_c1/f1p0/4620     |
| R01_cb1612_c9/f1p4/3376      | NA                       | NA                        | NA                           | R01_cb1612_c9/f1p4/3376      |
| R01_cb11632_c1/f1p0/2477     | NA                       | R01_cb11632_c1/f1p0/2477  | NA                           | NA                           |
| R01_cb5659_c32/f1p0/2068     | NA                       | NA                        | NA                           | R01_cb5659_c32/f1p0/2068     |
| R01_cb15651_c3/f1p0/564      | NA                       | R01_cb15651_c3/f1p0/564   | NA                           | NA                           |
| R01_cb6278_c16/f1p0/1750     | NA                       | NA                        | NA                           | R01_cb6278_c16/f1p0/1750     |
| R01_cb11206_c0/f1p0/1015     | NA                       | R01_cb11206_c0/f1p0/1015  | NA                           | R01_cb11206_c0/f1p0/1015     |
| R01_cb14004_c5/f1p1/1187     | NA                       | NA                        | NA                           | R01_cb14004_c5/f1p1/1187     |
| R01_cb6327_c2/f1p0/2581      | NA                       | R01_cb6327_c2/f1p0/2581   | R01_cb6327_c2/f1p0/2581      | R01_cb6327_c2/f1p0/2581      |
| R01_cb8564_c123839/f1p0/2304 | NA                       | NA                        | R01_cb8564_c123839/f1p0/2304 | R01_cb8564_c123839/f1p0/2304 |
| R01_cb13386_c16/f1p0/1396    | NA                       | R01_cb13386_c16/f1p0/1396 | NA                           | NA                           |
| R01_cb1138_c55/f2p1/913      | NA                       | NA                        | R01_cb1138_c55/f2p1/913      | R01_cb1138_c55/f2p1/913      |
| R01_cb18033_c1/f1p0/479      | R01_cb18033_c1/f1p0/479  | R01_cb18033_c1/f1p0/479   | R01_cb18033_c1/f1p0/479      | R01_cb18033_c1/f1p0/479      |
| R01_cb8564_c114342/f1p0/2738 | NA                       | NA                        | NA                           | R01_cb8564_c114342/f1p0/2738 |
| R01_cb17773_c1/f1p0/599      | R01_cb17773_c1/f1p0/599  | R01_cb17773_c1/f1p0/599   | R01_cb17773_c1/f1p0/599      | R01_cb17773_c1/f1p0/599      |
| R01_cb12924_c0/f1p0/1807     | R01_cb12924_c0/f1p0/1807 | R01_cb12924_c0/f1p0/1807  | NA                           | R01_cb12924_c0/f1p0/1807     |
| R01_cb4707_c0/f1p0/3293      | NA                       | NA                        | NA                           | R01_cb4707_c0/f1p0/3293      |
| R01_cb16383_c7/f1p0/1854     | NA                       | R01_cb16383_c7/f1p0/1854  | NA                           | R01_cb16383_c7/f1p0/1854     |
| R01_cb17398_c7/f1p0/1684     | NA                       | R01_cb17398_c7/f1p0/1684  | NA                           | NA                           |
| R01_cb9592_c1/f8p1/1581      | NA                       | NA                        | NA                           | R01_cb9592_c1/f8p1/1581      |
| R01_cb17756_c7/f2p0/783      | R01_cb17756_c7/f2p0/783  | R01_cb17756_c7/f2p0/783   | R01_cb17756_c7/f2p0/783      | R01_cb17756_c7/f2p0/783      |

|                                  |                          |                                  |                                  |                             |
|----------------------------------|--------------------------|----------------------------------|----------------------------------|-----------------------------|
| R01_cb11146_c1/flp0/3190         | R01_cb11146_c1/flp0/3190 | R01_cb11146_c1/flp0/3190         | NA                               | R01_cb11146_c1/flp0/3190    |
| R01_cb17821_c1/flp0/1365         | NA                       | R01_cb17821_c1/flp0/1365         | NA                               | NA                          |
| R01_cb15188_c3/flp0/606          | NA                       | R01_cb15188_c3/flp0/606          | NA                               | R01_cb15188_c3/flp0/606     |
| R01_cb4960_c6/flp0/796           | R01_cb4960_c6/flp0/796   | R01_cb4960_c6/flp0/796           | R01_cb4960_c6/flp0/796           | R01_cb4960_c6/flp0/796      |
| R01_cb8564_c77690/flp0/3725      | NA                       | R01_cb8564_c77690/flp0/3725      | NA                               | NA                          |
| R01_cb6523_c0/f6p0/2407          | NA                       | NA                               | NA                               | R01_cb6523_c0/f6p0/2407     |
| R01_cb8564_c110997/flp1/249<br>9 | NA                       | R01_cb8564_c110997/flp1/249<br>9 | NA                               | NA                          |
| R01_cb18847_c0/flp0/5087         | NA                       | R01_cb18847_c0/flp0/5087         | NA                               | NA                          |
| R01_cb8564_c124064/flp1/279<br>1 | NA                       | R01_cb8564_c124064/flp1/279<br>1 | R01_cb8564_c124064/flp1/279<br>1 | NA                          |
| R01_cb16038_c1/f2p1/549          | NA                       | R01_cb16038_c1/f2p1/549          | R01_cb16038_c1/f2p1/549          | R01_cb16038_c1/f2p1/549     |
| R01_cb8279_c11/flp0/2005         | NA                       | NA                               | NA                               | R01_cb8279_c11/flp0/2005    |
| R01_cb8564_c25182/flp0/3606      | NA                       | R01_cb8564_c25182/flp0/3606      | NA                               | NA                          |
| R01_cb8564_c87867/flp0/3820      | NA                       | R01_cb8564_c87867/flp0/3820      | NA                               | NA                          |
| R01_cb14854_c9/flp0/408          | R01_cb14854_c9/flp0/408  | R01_cb14854_c9/flp0/408          | R01_cb14854_c9/flp0/408          | R01_cb14854_c9/flp0/408     |
| R01_cb18103_c4/f2p0/1677         | NA                       | R01_cb18103_c4/f2p0/1677         | NA                               | NA                          |
| R01_cb1573_c28/flp0/2024         | NA                       | NA                               | NA                               | R01_cb1573_c28/flp0/2024    |
| R01_cb16264_c17/flp0/554         | R01_cb16264_c17/flp0/554 | R01_cb16264_c17/flp0/554         | R01_cb16264_c17/flp0/554         | R01_cb16264_c17/flp0/554    |
| R01_cb12767_c6/flp1/1044         | NA                       | R01_cb12767_c6/flp1/1044         | NA                               | R01_cb12767_c6/flp1/1044    |
| R01_cb7214_c10/flp0/1871         | NA                       | NA                               | NA                               | R01_cb7214_c10/flp0/1871    |
| R01_cb10364_c6/flp0/1793         | NA                       | NA                               | NA                               | R01_cb10364_c6/flp0/1793    |
| R01_cb12242_c2/flp0/872          | NA                       | NA                               | NA                               | R01_cb12242_c2/flp0/872     |
| R01_cb2403_c4/flp0/803           | NA                       | R01_cb2403_c4/flp0/803           | R01_cb2403_c4/flp0/803           | R01_cb2403_c4/flp0/803      |
| R01_cb16814_c2/flp0/477          | R01_cb16814_c2/flp0/477  | R01_cb16814_c2/flp0/477          | NA                               | R01_cb16814_c2/flp0/477     |
| R01_cb8564_c14160/flp0/3054      | NA                       | NA                               | NA                               | R01_cb8564_c14160/flp0/3054 |

|                                  |                          |                                  |                                  |                                  |
|----------------------------------|--------------------------|----------------------------------|----------------------------------|----------------------------------|
| R01_cb709_c18/flp0/1642          | NA                       | R01_cb709_c18/flp0/1642          | R01_cb709_c18/flp0/1642          | R01_cb709_c18/flp0/1642          |
| R01_cb18200_c1/flp0/1475         | R01_cb18200_c1/flp0/1475 | R01_cb18200_c1/flp0/1475         | R01_cb18200_c1/flp0/1475         | R01_cb18200_c1/flp0/1475         |
| R01_cb18456_c7394/flp0/1133      | NA                       | NA                               | R01_cb18456_c7394/flp0/1133      | NA                               |
| R01_cb9367_c0/f2p0/2124          | NA                       | NA                               | NA                               | R01_cb9367_c0/f2p0/2124          |
| R01_cb13875_c10/flp1/1513        | NA                       | NA                               | NA                               | R01_cb13875_c10/flp1/1513        |
| R01_cb18290_c5/flp0/669          | R01_cb18290_c5/flp0/669  | R01_cb18290_c5/flp0/669          | NA                               | NA                               |
| R01_cb8564_c122011/flp0/294<br>7 | NA                       | R01_cb8564_c122011/flp0/294<br>7 | NA                               | R01_cb8564_c122011/flp0/294<br>7 |
| R01_cb8564_c42178/flp0/2207      | NA                       | NA                               | NA                               | R01_cb8564_c42178/flp0/2207      |
| R01_cb8564_c88952/flp0/2454      | NA                       | NA                               | NA                               | R01_cb8564_c88952/flp0/2454      |
| R01_cb6377_c2/flp0/2528          | NA                       | NA                               | NA                               | R01_cb6377_c2/flp0/2528          |
| R01_cb8564_c122473/f2p0/197<br>9 | NA                       | NA                               | R01_cb8564_c122473/f2p0/197<br>9 | R01_cb8564_c122473/f2p0/197<br>9 |
| R01_cb9271_c3/flp0/2135          | NA                       | R01_cb9271_c3/flp0/2135          | NA                               | NA                               |
| R01_cb15672_c1/flp0/1541         | NA                       | NA                               | NA                               | R01_cb15672_c1/flp0/1541         |
| R01_cb14576_c1/flp0/1802         | NA                       | NA                               | R01_cb14576_c1/flp0/1802         | R01_cb14576_c1/flp0/1802         |
| R01_cb14125_c154/flp0/1749       | NA                       | R01_cb14125_c154/flp0/1749       | NA                               | R01_cb14125_c154/flp0/1749       |
| R01_cb18492_c0/flp0/905          | NA                       | NA                               | NA                               | R01_cb18492_c0/flp0/905          |
| R01_cb14060_c1/flp0/624          | R01_cb14060_c1/flp0/624  | R01_cb14060_c1/flp0/624          | R01_cb14060_c1/flp0/624          | R01_cb14060_c1/flp0/624          |
| R01_cb17082_c4/flp0/634          | R01_cb17082_c4/flp0/634  | R01_cb17082_c4/flp0/634          | R01_cb17082_c4/flp0/634          | R01_cb17082_c4/flp0/634          |
| R01_cb124_c2/f4p0/2458           | NA                       | NA                               | NA                               | R01_cb124_c2/f4p0/2458           |
| R01_cb9540_c1/flp0/2093          | R01_cb9540_c1/flp0/2093  | R01_cb9540_c1/flp0/2093          | NA                               | R01_cb9540_c1/flp0/2093          |
| R01_cb13513_c5/flp0/677          | NA                       | R01_cb13513_c5/flp0/677          | NA                               | NA                               |
| R01_cb5421_c6/flp0/2803          | NA                       | NA                               | R01_cb5421_c6/flp0/2803          | NA                               |
| R01_cb17855_c1/flp0/767          | NA                       | NA                               | NA                               | R01_cb17855_c1/flp0/767          |
| R01_cb8710_c3/f2p0/2101          | NA                       | R01_cb8710_c3/f2p0/2101          | R01_cb8710_c3/f2p0/2101          | R01_cb8710_c3/f2p0/2101          |

|                                  |                          |                                  |                                  |                             |
|----------------------------------|--------------------------|----------------------------------|----------------------------------|-----------------------------|
| R01_cb10771_c3/fl0p0/631         | NA                       | NA                               | R01_cb10771_c3/fl0p0/631         | R01_cb10771_c3/fl0p0/631    |
| R01_cb8564_c124842/flp0/246<br>3 | NA                       | R01_cb8564_c124842/flp0/246<br>3 | R01_cb8564_c124842/flp0/246<br>3 | NA                          |
| R01_cb6106_c26/flp0/735          | R01_cb6106_c26/flp0/735  | R01_cb6106_c26/flp0/735          | NA                               | R01_cb6106_c26/flp0/735     |
| R01_cb8797_c1/flp0/2456          | NA                       | R01_cb8797_c1/flp0/2456          | R01_cb8797_c1/flp0/2456          | R01_cb8797_c1/flp0/2456     |
| R01_cb7114_c12/fl16p1/1407       | NA                       | NA                               | NA                               | R01_cb7114_c12/fl16p1/1407  |
| R01_cb15364_c2/flp0/1256         | NA                       | NA                               | NA                               | R01_cb15364_c2/flp0/1256    |
| R01_cb4489_c8/flp0/2559          | NA                       | R01_cb4489_c8/flp0/2559          | NA                               | R01_cb4489_c8/flp0/2559     |
| R01_cb16732_c1/flp0/546          | NA                       | R01_cb16732_c1/flp0/546          | NA                               | R01_cb16732_c1/flp0/546     |
| R01_cb16290_c1/flp0/1087         | NA                       | R01_cb16290_c1/flp0/1087         | R01_cb16290_c1/flp0/1087         | R01_cb16290_c1/flp0/1087    |
| R01_cb13651_c22/flp0/970         | NA                       | R01_cb13651_c22/flp0/970         | NA                               | NA                          |
| R01_cb8564_c82698/flp0/4117      | NA                       | NA                               | NA                               | R01_cb8564_c82698/flp0/4117 |
| R01_cb8560_c0/f4p2/2329          | NA                       | NA                               | NA                               | R01_cb8560_c0/f4p2/2329     |
| R01_cb15449_c0/flp0/1414         | R01_cb15449_c0/flp0/1414 | R01_cb15449_c0/flp0/1414         | R01_cb15449_c0/flp0/1414         | R01_cb15449_c0/flp0/1414    |
| R01_cb7564_c37/flp0/3940         | NA                       | R01_cb7564_c37/flp0/3940         | NA                               | NA                          |
| R01_cb3632_c0/flp0/3572          | NA                       | NA                               | NA                               | R01_cb3632_c0/flp0/3572     |
| R01_cb2632_c8/flp0/1556          | NA                       | R01_cb2632_c8/flp0/1556          | R01_cb2632_c8/flp0/1556          | R01_cb2632_c8/flp0/1556     |
| R01_cb977_c4/flp0/2908           | NA                       | NA                               | NA                               | R01_cb977_c4/flp0/2908      |
| R01_cb11149_c1/flp0/2502         | NA                       | NA                               | R01_cb11149_c1/flp0/2502         | NA                          |
| R01_cb16706_c6/flp0/1339         | R01_cb16706_c6/flp0/1339 | R01_cb16706_c6/flp0/1339         | R01_cb16706_c6/flp0/1339         | R01_cb16706_c6/flp0/1339    |
| R01_cb7612_c4/flp1/3029          | NA                       | NA                               | NA                               | R01_cb7612_c4/flp1/3029     |
| R01_cb7308_c10/flp0/1431         | NA                       | NA                               | NA                               | R01_cb7308_c10/flp0/1431    |
| R01_cb3921_c2/flp0/2076          | NA                       | NA                               | NA                               | R01_cb3921_c2/flp0/2076     |
| R01_cb6258_c24/flp1/2622         | NA                       | NA                               | NA                               | R01_cb6258_c24/flp1/2622    |
| R01_cb6507_c6/flp2/1136          | NA                       | NA                               | NA                               | R01_cb6507_c6/flp2/1136     |
| R01_cb17973_c8/f2p0/554          | R01_cb17973_c8/f2p0/554  | R01_cb17973_c8/f2p0/554          | R01_cb17973_c8/f2p0/554          | NA                          |

|                             |                             |                             |                             |                             |
|-----------------------------|-----------------------------|-----------------------------|-----------------------------|-----------------------------|
| R01_cb4573_c0/f2p0/3041     | R01_cb4573_c0/f2p0/3041     | R01_cb4573_c0/f2p0/3041     | R01_cb4573_c0/f2p0/3041     | R01_cb4573_c0/f2p0/3041     |
| R01_cb18456_c6361/f1p0/486  | R01_cb18456_c6361/f1p0/486  | R01_cb18456_c6361/f1p0/486  | R01_cb18456_c6361/f1p0/486  | R01_cb18456_c6361/f1p0/486  |
| R01_cb15904_c3/f1p0/1213    | NA                          | R01_cb15904_c3/f1p0/1213    | R01_cb15904_c3/f1p0/1213    | R01_cb15904_c3/f1p0/1213    |
| R01_cb17773_c0/f1p0/1513    | NA                          | R01_cb17773_c0/f1p0/1513    | R01_cb17773_c0/f1p0/1513    | NA                          |
| R01_cb10401_c2/f1p0/4006    | NA                          | NA                          | NA                          | R01_cb10401_c2/f1p0/4006    |
| R01_cb11776_c1/f1p0/3563    | R01_cb11776_c1/f1p0/3563    | R01_cb11776_c1/f1p0/3563    | NA                          | NA                          |
| R01_cb6861_c8/f1p0/3931     | NA                          | R01_cb6861_c8/f1p0/3931     | NA                          | R01_cb6861_c8/f1p0/3931     |
| R01_cb8564_c34126/f2p0/3326 | NA                          | R01_cb8564_c34126/f2p0/3326 | NA                          | NA                          |
| R01_cb8564_c25561/f1p0/2461 | NA                          | R01_cb8564_c25561/f1p0/2461 | R01_cb8564_c25561/f1p0/2461 | R01_cb8564_c25561/f1p0/2461 |
| R01_cb12493_c4/f1p0/336     | R01_cb12493_c4/f1p0/336     | R01_cb12493_c4/f1p0/336     | R01_cb12493_c4/f1p0/336     | R01_cb12493_c4/f1p0/336     |
| R01_cb4768_c89/f1p0/2920    | NA                          | R01_cb4768_c89/f1p0/2920    | R01_cb4768_c89/f1p0/2920    | R01_cb4768_c89/f1p0/2920    |
| R01_cb4590_c11/f1p0/2954    | NA                          | NA                          | NA                          | R01_cb4590_c11/f1p0/2954    |
| R01_cb8564_c39636/f1p0/2896 | NA                          | R01_cb8564_c39636/f1p0/2896 | R01_cb8564_c39636/f1p0/2896 | R01_cb8564_c39636/f1p0/2896 |
| R01_cb8564_c39892/f1p0/2908 | R01_cb8564_c39892/f1p0/2908 | R01_cb8564_c39892/f1p0/2908 | NA                          | NA                          |
| R01_cb14328_c2/f1p0/790     | NA                          | NA                          | R01_cb14328_c2/f1p0/790     | R01_cb14328_c2/f1p0/790     |
| R01_cb8564_c75371/f1p0/1913 | NA                          | R01_cb8564_c75371/f1p0/1913 | NA                          | NA                          |
| R01_cb507_c4/f1p0/3466      | NA                          | NA                          | NA                          | R01_cb507_c4/f1p0/3466      |
| R01_cb17363_c11/f1p0/1824   | NA                          | R01_cb17363_c11/f1p0/1824   | R01_cb17363_c11/f1p0/1824   | R01_cb17363_c11/f1p0/1824   |
| R01_cb16757_c2/f1p0/1800    | NA                          | R01_cb16757_c2/f1p0/1800    | NA                          | NA                          |
| R01_cb15334_c1/f2p0/366     | NA                          | R01_cb15334_c1/f2p0/366     | R01_cb15334_c1/f2p0/366     | R01_cb15334_c1/f2p0/366     |
| R01_cb9287_c2/f1p0/1231     | NA                          | R01_cb9287_c2/f1p0/1231     | NA                          | NA                          |
| R01_cb693_c0/f6p0/2904      | NA                          | NA                          | NA                          | R01_cb693_c0/f6p0/2904      |
| R01_cb16290_c4/f1p0/1075    | NA                          | R01_cb16290_c4/f1p0/1075    | R01_cb16290_c4/f1p0/1075    | R01_cb16290_c4/f1p0/1075    |
| R01_cb3759_c16/f1p0/3176    | NA                          | R01_cb3759_c16/f1p0/3176    | NA                          | NA                          |
| R01_cb18456_c7970/f1p0/474  | R01_cb18456_c7970/f1p0/474  | R01_cb18456_c7970/f1p0/474  | R01_cb18456_c7970/f1p0/474  | R01_cb18456_c7970/f1p0/474  |

|                              |                              |                              |                              |                             |
|------------------------------|------------------------------|------------------------------|------------------------------|-----------------------------|
| R01_cb17997_c6/flp0/1060     | NA                           | NA                           | NA                           | R01_cb17997_c6/flp0/1060    |
| R01_cb8564_c112293/flp0/2155 | NA                           | R01_cb8564_c112293/flp0/2155 | NA                           | NA                          |
| R01_cb13284_c9/flp0/1620     | NA                           | NA                           | NA                           | R01_cb13284_c9/flp0/1620    |
| R01_cb8564_c19716/flp0/2217  | NA                           | NA                           | NA                           | R01_cb8564_c19716/flp0/2217 |
| R01_cb15685_c1/flp0/717      | NA                           | R01_cb15685_c1/flp0/717      | NA                           | R01_cb15685_c1/flp0/717     |
| R01_cb1113_c4/flp1/2699      | NA                           | R01_cb1113_c4/flp1/2699      | NA                           | NA                          |
| R01_cb14421_c1/flp0/919      | NA                           | NA                           | NA                           | R01_cb14421_c1/flp0/919     |
| R01_cb12722_c9/flp4/1835     | NA                           | NA                           | NA                           | R01_cb12722_c9/flp4/1835    |
| R01_cb6406_c52/flp0/3671     | NA                           | R01_cb6406_c52/flp0/3671     | NA                           | R01_cb6406_c52/flp0/3671    |
| R01_cb8564_c70226/flp0/22155 | R01_cb8564_c70226/flp0/22155 | R01_cb8564_c70226/flp0/22155 | R01_cb8564_c70226/flp0/22155 | NA                          |
| R01_cb5504_c25/flp0/2640     | NA                           | R01_cb5504_c25/flp0/2640     | NA                           | R01_cb5504_c25/flp0/2640    |
| R01_cb16739_c1/f2p0/750      | NA                           | NA                           | NA                           | R01_cb16739_c1/f2p0/750     |
| R01_cb3132_c8/flp0/1609      | NA                           | NA                           | NA                           | R01_cb3132_c8/flp0/1609     |
| R01_cb7092_c0/f2p1/2704      | NA                           | R01_cb7092_c0/f2p1/2704      | NA                           | NA                          |
| R01_cb17925_c0/flp0/1096     | NA                           | NA                           | R01_cb17925_c0/flp0/1096     | R01_cb17925_c0/flp0/1096    |
| R01_cb11051_c7/flp0/685      | NA                           | R01_cb11051_c7/flp0/685      | NA                           | R01_cb11051_c7/flp0/685     |
| R01_cb7507_c11/flp0/1603     | NA                           | R01_cb7507_c11/flp0/1603     | NA                           | NA                          |
| R01_cb17192_c4/flp0/1017     | NA                           | R01_cb17192_c4/flp0/1017     | NA                           | NA                          |
| R01_cb10775_c2/flp0/1221     | NA                           | NA                           | R01_cb10775_c2/flp0/1221     | R01_cb10775_c2/flp0/1221    |
| R01_cb11167_c0/flp0/310      | R01_cb11167_c0/flp0/310      | R01_cb11167_c0/flp0/310      | R01_cb11167_c0/flp0/310      | R01_cb11167_c0/flp0/310     |
| R01_cb8564_c74474/flp0/3918  | NA                           | R01_cb8564_c74474/flp0/3918  | NA                           | NA                          |
| R01_cb5986_c0/flp0/2957      | NA                           | R01_cb5986_c0/flp0/2957      | NA                           | NA                          |
| R01_cb18526_c3/flp0/554      | R01_cb18526_c3/flp0/554      | R01_cb18526_c3/flp0/554      | R01_cb18526_c3/flp0/554      | R01_cb18526_c3/flp0/554     |
| R01_cb15807_c2/flp0/695      | NA                           | NA                           | NA                           | R01_cb15807_c2/flp0/695     |

|                             |                            |                             |                            |                             |
|-----------------------------|----------------------------|-----------------------------|----------------------------|-----------------------------|
| R01_cb2072_c31/flp0/2869    | NA                         | NA                          | NA                         | R01_cb2072_c31/flp0/2869    |
| R01_cb18409_c110/flp0/508   | R01_cb18409_c110/flp0/508  | R01_cb18409_c110/flp0/508   | R01_cb18409_c110/flp0/508  | R01_cb18409_c110/flp0/508   |
| R01_cb14839_c0/flp0/855     | NA                         | NA                          | R01_cb14839_c0/flp0/855    | R01_cb14839_c0/flp0/855     |
| R01_cb226_c12/flp0/5289     | NA                         | NA                          | NA                         | R01_cb226_c12/flp0/5289     |
| R01_cb12292_c13/flp0/1000   | NA                         | R01_cb12292_c13/flp0/1000   | NA                         | NA                          |
| R01_cb18456_c5803/flp0/387  | R01_cb18456_c5803/flp0/387 | R01_cb18456_c5803/flp0/387  | R01_cb18456_c5803/flp0/387 | R01_cb18456_c5803/flp0/387  |
| R01_cb5900_c49/flp0/1960    | NA                         | NA                          | NA                         | R01_cb5900_c49/flp0/1960    |
| R01_cb1625_c1/flp0/2747     | NA                         | NA                          | NA                         | R01_cb1625_c1/flp0/2747     |
| R01_cb10034_c57/flp0/608    | NA                         | R01_cb10034_c57/flp0/608    | NA                         | NA                          |
| R01_cb4180_c5/flp0/3863     | NA                         | R01_cb4180_c5/flp0/3863     | NA                         | R01_cb4180_c5/flp0/3863     |
| R01_cb14377_c1/flp0/1462    | NA                         | NA                          | NA                         | R01_cb14377_c1/flp0/1462    |
| R01_cb3634_c2/flp0/2100     | NA                         | R01_cb3634_c2/flp0/2100     | NA                         | NA                          |
| R01_cb8564_c82635/flp0/2823 | NA                         | R01_cb8564_c82635/flp0/2823 | NA                         | R01_cb8564_c82635/flp0/2823 |
| R01_cb8564_c77006/flp0/2229 | NA                         | R01_cb8564_c77006/flp0/2229 | NA                         | R01_cb8564_c77006/flp0/2229 |
| R01_cb8564_c5039/flp0/3047  | NA                         | NA                          | NA                         | R01_cb8564_c5039/flp0/3047  |
| R01_cb17388_c15/flp0/751    | R01_cb17388_c15/flp0/751   | R01_cb17388_c15/flp0/751    | R01_cb17388_c15/flp0/751   | R01_cb17388_c15/flp0/751    |
| R01_cb10482_c21/flp3/1026   | NA                         | R01_cb10482_c21/flp3/1026   | NA                         | NA                          |
| R01_cb13602_c4/f2p0/1770    | NA                         | NA                          | NA                         | R01_cb13602_c4/f2p0/1770    |
| R01_cb8564_c89017/flp0/2254 | NA                         | R01_cb8564_c89017/flp0/2254 | NA                         | R01_cb8564_c89017/flp0/2254 |
| R01_cb15516_c5/flp0/1772    | NA                         | R01_cb15516_c5/flp0/1772    | NA                         | R01_cb15516_c5/flp0/1772    |
| R01_cb15279_c1/flp0/1492    | NA                         | NA                          | NA                         | R01_cb15279_c1/flp0/1492    |
| R01_cb8564_c78032/flp0/1858 | NA                         | NA                          | NA                         | R01_cb8564_c78032/flp0/1858 |
| R01_cb5214_c5/flp1/2841     | NA                         | R01_cb5214_c5/flp1/2841     | R01_cb5214_c5/flp1/2841    | NA                          |
| R01_cb10717_c2/flp0/2474    | NA                         | R01_cb10717_c2/flp0/2474    | NA                         | NA                          |
| R01_cb15891_c6/flp0/1371    | NA                         | R01_cb15891_c6/flp0/1371    | NA                         | NA                          |
| R01_cb6672_c1/flp0/2797     | NA                         | NA                          | NA                         | R01_cb6672_c1/flp0/2797     |

|                             |                             |                             |                             |                             |
|-----------------------------|-----------------------------|-----------------------------|-----------------------------|-----------------------------|
| R01_cb7708_c8/flp0/743      | NA                          | R01_cb7708_c8/flp0/743      | NA                          | NA                          |
| R01_cb15984_c3/flp0/1675    | NA                          | R01_cb15984_c3/flp0/1675    | NA                          | NA                          |
| R01_cb3739_c3/flp1/2887     | R01_cb3739_c3/flp1/2887     | R01_cb3739_c3/flp1/2887     | R01_cb3739_c3/flp1/2887     | R01_cb3739_c3/flp1/2887     |
| R01_cb6113_c4/flp0/2618     | R01_cb6113_c4/flp0/2618     | R01_cb6113_c4/flp0/2618     | NA                          | R01_cb6113_c4/flp0/2618     |
| R01_cb2045_c5/flp0/2453     | NA                          | NA                          | NA                          | R01_cb2045_c5/flp0/2453     |
| R01_cb8564_c18924/flp0/3930 | NA                          | R01_cb8564_c18924/flp0/3930 | NA                          | NA                          |
| R01_cb8564_c47461/flp0/4325 | NA                          | NA                          | NA                          | R01_cb8564_c47461/flp0/4325 |
| R01_cb9342_c10/flp0/1672    | NA                          | R01_cb9342_c10/flp0/1672    | NA                          | NA                          |
| R01_cb8564_c84780/flp1/2711 | NA                          | R01_cb8564_c84780/flp1/2711 | R01_cb8564_c84780/flp1/2711 | R01_cb8564_c84780/flp1/2711 |
| R01_cb11796_c1/flp0/3530    | NA                          | R01_cb11796_c1/flp0/3530    | R01_cb11796_c1/flp0/3530    | R01_cb11796_c1/flp0/3530    |
| R01_cb12187_c0/f3p0/1404    | NA                          | NA                          | NA                          | R01_cb12187_c0/f3p0/1404    |
| R01_cb16706_c5/flp0/690     | NA                          | R01_cb16706_c5/flp0/690     | NA                          | R01_cb16706_c5/flp0/690     |
| R01_cb12421_c62/flp0/640    | NA                          | R01_cb12421_c62/flp0/640    | NA                          | NA                          |
| R01_cb2022_c8/flp0/3727     | NA                          | NA                          | NA                          | R01_cb2022_c8/flp0/3727     |
| R01_cb8564_c9427/f3p0/2261  | NA                          | NA                          | NA                          | R01_cb8564_c9427/f3p0/2261  |
| R01_cb5158_c2/flp0/3008     | NA                          | NA                          | NA                          | R01_cb5158_c2/flp0/3008     |
| R01_cb8564_c90033/flp0/2734 | R01_cb8564_c90033/flp0/2734 | R01_cb8564_c90033/flp0/2734 | NA                          | NA                          |
| R01_cb8778_c4/flp1/823      | NA                          | R01_cb8778_c4/flp1/823      | NA                          | R01_cb8778_c4/flp1/823      |
| R01_cb6103_c6/flp0/2906     | NA                          | R01_cb6103_c6/flp0/2906     | NA                          | NA                          |
| R01_cb8564_c74585/flp0/3890 | NA                          | R01_cb8564_c74585/flp0/3890 | R01_cb8564_c74585/flp0/3890 | R01_cb8564_c74585/flp0/3890 |
| R01_cb6431_c29/flp1/2534    | NA                          | R01_cb6431_c29/flp1/2534    | NA                          | NA                          |
| R01_cb279_c8/flp0/4893      | NA                          | NA                          | NA                          | R01_cb279_c8/flp0/4893      |
| R01_cb13532_c10/flp1/1100   | R01_cb13532_c10/flp1/1100   | NA                          | R01_cb13532_c10/flp1/1100   | R01_cb13532_c10/flp1/1100   |
| R01_cb15465_c3/flp3/574     | R01_cb15465_c3/flp3/574     | NA                          | R01_cb15465_c3/flp3/574     | R01_cb15465_c3/flp3/574     |
| R01_cb18132_c19/flp0/658    | NA                          | R01_cb18132_c19/flp0/658    | R01_cb18132_c19/flp0/658    | R01_cb18132_c19/flp0/658    |



|                             |                            |                             |                             |                             |
|-----------------------------|----------------------------|-----------------------------|-----------------------------|-----------------------------|
| R01_cb18456_c7385/f1p0/447  | R01_cb18456_c7385/f1p0/447 | R01_cb18456_c7385/f1p0/447  | R01_cb18456_c7385/f1p0/447  | R01_cb18456_c7385/f1p0/447  |
| R01_cb1020_c46/f1p0/440     | R01_cb1020_c46/f1p0/440    | R01_cb1020_c46/f1p0/440     | R01_cb1020_c46/f1p0/440     | R01_cb1020_c46/f1p0/440     |
| R01_cb13535_c14/f1p0/838    | NA                         | R01_cb13535_c14/f1p0/838    | NA                          | R01_cb13535_c14/f1p0/838    |
| R01_cb2396_c8/f1p0/2562     | NA                         | R01_cb2396_c8/f1p0/2562     | NA                          | NA                          |
| R01_cb8564_c71885/f2p1/2637 | NA                         | NA                          | NA                          | R01_cb8564_c71885/f2p1/2637 |
| R01_cb7784_c7/f1p0/2404     | NA                         | R01_cb7784_c7/f1p0/2404     | NA                          | NA                          |
| R01_cb4489_c6/f2p1/2678     | NA                         | R01_cb4489_c6/f2p1/2678     | NA                          | R01_cb4489_c6/f2p1/2678     |
| R01_cb8564_c89565/f1p0/2829 | NA                         | R01_cb8564_c89565/f1p0/2829 | NA                          | R01_cb8564_c89565/f1p0/2829 |
| R01_cb8564_c71819/f1p0/4142 | NA                         | NA                          | NA                          | R01_cb8564_c71819/f1p0/4142 |
| R01_cb3046_c5/f1p0/3275     | NA                         | NA                          | NA                          | R01_cb3046_c5/f1p0/3275     |
| R01_cb8564_c82357/f1p0/2491 | NA                         | NA                          | R01_cb8564_c82357/f1p0/2491 | R01_cb8564_c82357/f1p0/2491 |
| R01_cb4900_c17/f1p1/2753    | NA                         | NA                          | NA                          | R01_cb4900_c17/f1p1/2753    |
| R01_cb16422_c1/f3p0/753     | NA                         | NA                          | NA                          | R01_cb16422_c1/f3p0/753     |
| R01_cb18196_c1/f1p0/1338    | NA                         | R01_cb18196_c1/f1p0/1338    | NA                          | R01_cb18196_c1/f1p0/1338    |
| R01_cb17984_c2/f3p0/1241    | NA                         | NA                          | NA                          | R01_cb17984_c2/f3p0/1241    |
| R01_cb7010_c12/f2p1/2966    | NA                         | R01_cb7010_c12/f2p1/2966    | NA                          | NA                          |
| R01_cb9937_c1/f1p0/1919     | NA                         | R01_cb9937_c1/f1p0/1919     | NA                          | NA                          |
| R01_cb18109_c1/f1p0/444     | R01_cb18109_c1/f1p0/444    | R01_cb18109_c1/f1p0/444     | NA                          | NA                          |
| R01_cb13353_c2/f1p0/581     | R01_cb13353_c2/f1p0/581    | NA                          | NA                          | R01_cb13353_c2/f1p0/581     |
| R01_cb16383_c2/f2p0/1209    | NA                         | R01_cb16383_c2/f2p0/1209    | NA                          | R01_cb16383_c2/f2p0/1209    |
| R01_cb2767_c2/f1p0/3869     | NA                         | R01_cb2767_c2/f1p0/3869     | NA                          | NA                          |
| R01_cb8564_c69111/f2p0/2818 | NA                         | NA                          | NA                          | R01_cb8564_c69111/f2p0/2818 |
| R01_cb17602_c2/f1p0/1447    | NA                         | NA                          | NA                          | R01_cb17602_c2/f1p0/1447    |
| R01_cb14286_c1/f1p0/1099    | NA                         | R01_cb14286_c1/f1p0/1099    | NA                          | R01_cb14286_c1/f1p0/1099    |
| R01_cb5159_c13/f1p0/1964    | NA                         | NA                          | NA                          | R01_cb5159_c13/f1p0/1964    |
| R01_cb8564_c87017/f1p0/2003 | R01_cb8564_c87017/f1p0/200 | R01_cb8564_c87017/f1p0/2003 | NA                          | R01_cb8564_c87017/f1p0/2003 |

---

|                             |                            |                             |                             |                             |
|-----------------------------|----------------------------|-----------------------------|-----------------------------|-----------------------------|
| R01_cb18456_c7506/f1p0/731  | R01_cb18456_c7506/f1p0/731 | R01_cb18456_c7506/f1p0/731  | NA                          | NA                          |
| R01_cb8564_c11951/f1p0/3240 | NA                         | R01_cb8564_c11951/f1p0/3240 | NA                          | R01_cb8564_c11951/f1p0/3240 |
| R01_cb8564_c4834/f1p0/3516  | R01_cb8564_c4834/f1p0/3516 | R01_cb8564_c4834/f1p0/3516  | R01_cb8564_c4834/f1p0/3516  | R01_cb8564_c4834/f1p0/3516  |
| R01_cb8946_c2/f1p0/2040     | NA                         | NA                          | NA                          | R01_cb8946_c2/f1p0/2040     |
| R01_cb709_c1/f1p0/2627      | NA                         | NA                          | R01_cb709_c1/f1p0/2627      | NA                          |
| R01_cb4719_c20/f1p0/1514    | NA                         | NA                          | R01_cb4719_c20/f1p0/1514    | R01_cb4719_c20/f1p0/1514    |
| R01_cb11732_c1/f1p0/3497    | NA                         | R01_cb11732_c1/f1p0/3497    | NA                          | NA                          |
| R01_cb1938_c5/f1p0/2356     | NA                         | NA                          | NA                          | R01_cb1938_c5/f1p0/2356     |
| R01_cb14751_c4/f1p0/607     | NA                         | R01_cb14751_c4/f1p0/607     | NA                          | NA                          |
| R01_cb8564_c68577/f4p0/4465 | NA                         | R01_cb8564_c68577/f4p0/4465 | R01_cb8564_c68577/f4p0/4465 | NA                          |
| R01_cb4368_c0/f33p1/1481    | NA                         | NA                          | NA                          | R01_cb4368_c0/f33p1/1481    |
| R01_cb5900_c44/f1p0/2368    | NA                         | R01_cb5900_c44/f1p0/2368    | NA                          | R01_cb5900_c44/f1p0/2368    |
| R01_cb191_c4/f1p0/3237      | NA                         | NA                          | NA                          | R01_cb191_c4/f1p0/3237      |
| R01_cb17466_c0/f2p0/1697    | NA                         | NA                          | R01_cb17466_c0/f2p0/1697    | NA                          |
| R01_cb7663_c3/f1p0/2573     | NA                         | R01_cb7663_c3/f1p0/2573     | R01_cb7663_c3/f1p0/2573     | R01_cb7663_c3/f1p0/2573     |
| R01_cb16439_c0/f1p0/832     | NA                         | NA                          | NA                          | R01_cb16439_c0/f1p0/832     |
| R01_cb119_c23/f1p0/3973     | NA                         | NA                          | NA                          | R01_cb119_c23/f1p0/3973     |
| R01_cb5378_c3/f1p0/1563     | R01_cb5378_c3/f1p0/1563    | R01_cb5378_c3/f1p0/1563     | R01_cb5378_c3/f1p0/1563     | R01_cb5378_c3/f1p0/1563     |
| R01_cb4657_c12/f1p0/2084    | NA                         | R01_cb4657_c12/f1p0/2084    | R01_cb4657_c12/f1p0/2084    | NA                          |
| R01_cb8564_c35910/f1p0/3231 | NA                         | NA                          | NA                          | R01_cb8564_c35910/f1p0/3231 |
| R01_cb7862_c1/f2p0/1017     | NA                         | R01_cb7862_c1/f2p0/1017     | R01_cb7862_c1/f2p0/1017     | R01_cb7862_c1/f2p0/1017     |
| R01_cb12636_c4/f1p0/1468    | NA                         | NA                          | NA                          | R01_cb12636_c4/f1p0/1468    |
| R01_cb3500_c22/f1p0/3320    | NA                         | NA                          | NA                          | R01_cb3500_c22/f1p0/3320    |
| R01_cb18456_c7603/f1p0/559  | NA                         | R01_cb18456_c7603/f1p0/559  | R01_cb18456_c7603/f1p0/559  | R01_cb18456_c7603/f1p0/559  |
| R01_cb16590_c0/f2p0/1477    | R01_cb16590_c0/f2p0/1477   | R01_cb16590_c0/f2p0/1477    | R01_cb16590_c0/f2p0/1477    | R01_cb16590_c0/f2p0/1477    |

---

|                              |                              |                              |                             |                              |
|------------------------------|------------------------------|------------------------------|-----------------------------|------------------------------|
| R01_cb16997_c89/f1p0/2621    | NA                           | R01_cb16997_c89/f1p0/2621    | NA                          | NA                           |
| R01_cb8907_c0/f3p0/897       | R01_cb8907_c0/f3p0/897       | R01_cb8907_c0/f3p0/897       | R01_cb8907_c0/f3p0/897      | R01_cb8907_c0/f3p0/897       |
| R01_cb8564_c15836/f2p2/2956  | NA                           | R01_cb8564_c15836/f2p2/2956  | NA                          | NA                           |
| R01_cb4533_c0/f1p0/3317      | NA                           | R01_cb4533_c0/f1p0/3317      | NA                          | R01_cb4533_c0/f1p0/3317      |
| R01_cb2884_c1/f2p0/2257      | NA                           | NA                           | NA                          | R01_cb2884_c1/f2p0/2257      |
| R01_cb10606_c0/f1p0/1733     | NA                           | R01_cb10606_c0/f1p0/1733     | NA                          | NA                           |
| R01_cb781_c17/f1p0/1917      | NA                           | NA                           | NA                          | R01_cb781_c17/f1p0/1917      |
| R01_cb5218_c2/f1p0/3153      | NA                           | R01_cb5218_c2/f1p0/3153      | NA                          | NA                           |
| R01_cb8564_c122421/f1p0/2089 | NA                           | NA                           | NA                          | R01_cb8564_c122421/f1p0/2089 |
| R01_cb8564_c35718/f1p0/2911  | NA                           | NA                           | R01_cb8564_c35718/f1p0/2911 | NA                           |
| R01_cb10976_c1/f1p0/2738     | NA                           | R01_cb10976_c1/f1p0/2738     | NA                          | NA                           |
| R01_cb7747_c5/f1p0/2463      | NA                           | R01_cb7747_c5/f1p0/2463      | R01_cb7747_c5/f1p0/2463     | R01_cb7747_c5/f1p0/2463      |
| R01_cb6591_c5/f2p0/2613      | R01_cb6591_c5/f2p0/2613      | R01_cb6591_c5/f2p0/2613      | NA                          | NA                           |
| R01_cb18456_c6300/f1p0/559   | R01_cb18456_c6300/f1p0/559   | R01_cb18456_c6300/f1p0/559   | R01_cb18456_c6300/f1p0/559  | R01_cb18456_c6300/f1p0/559   |
| R01_cb7950_c0/f3p0/2499      | NA                           | R01_cb7950_c0/f3p0/2499      | NA                          | R01_cb7950_c0/f3p0/2499      |
| R01_cb1905_c24/f1p0/2875     | NA                           | R01_cb1905_c24/f1p0/2875     | R01_cb1905_c24/f1p0/2875    | R01_cb1905_c24/f1p0/2875     |
| R01_cb8564_c119692/f1p0/2900 | R01_cb8564_c119692/f1p0/2900 | R01_cb8564_c119692/f1p0/2900 | NA                          | NA                           |
| R01_cb11677_c0/f1p0/1016     | NA                           | R01_cb11677_c0/f1p0/1016     | R01_cb11677_c0/f1p0/1016    | R01_cb11677_c0/f1p0/1016     |
| R01_cb1835_c2/f1p0/4206      | NA                           | NA                           | NA                          | R01_cb1835_c2/f1p0/4206      |
| R01_cb10554_c3/f1p0/3885     | NA                           | R01_cb10554_c3/f1p0/3885     | NA                          | NA                           |
| R01_cb2198_c1/f1p0/3995      | NA                           | NA                           | R01_cb2198_c1/f1p0/3995     | R01_cb2198_c1/f1p0/3995      |
| R01_cb8564_c3066/f1p1/3917   | NA                           | R01_cb8564_c3066/f1p1/3917   | NA                          | R01_cb8564_c3066/f1p1/3917   |
| R01_cb13012_c2/f2p1/1113     | NA                           | NA                           | NA                          | R01_cb13012_c2/f2p1/1113     |
| R01_cb15951_c0/f2p0/476      | R01_cb15951_c0/f2p0/476      | R01_cb15951_c0/f2p0/476      | R01_cb15951_c0/f2p0/476     | R01_cb15951_c0/f2p0/476      |

|                              |                          |                              |                          |                             |
|------------------------------|--------------------------|------------------------------|--------------------------|-----------------------------|
| R01_cb17737_c1/flp0/1258     | R01_cb17737_c1/flp0/1258 | R01_cb17737_c1/flp0/1258     | R01_cb17737_c1/flp0/1258 | NA                          |
| R01_cb11774_c0/flp0/857      | NA                       | NA                           | NA                       | R01_cb11774_c0/flp0/857     |
| R01_cb15361_c0/f8p1/810      | NA                       | NA                           | R01_cb15361_c0/f8p1/810  | R01_cb15361_c0/f8p1/810     |
| R01_cb10506_c6/flp0/410      | R01_cb10506_c6/flp0/410  | R01_cb10506_c6/flp0/410      | R01_cb10506_c6/flp0/410  | R01_cb10506_c6/flp0/410     |
| R01_cb2087_c5/flp0/3142      | NA                       | R01_cb2087_c5/flp0/3142      | NA                       | NA                          |
| R01_cb8564_c119077/flp0/4938 | NA                       | R01_cb8564_c119077/flp0/4938 | NA                       | NA                          |
| R01_cb8564_c14854/f2p0/2226  | NA                       | NA                           | NA                       | R01_cb8564_c14854/f2p0/2226 |
| R01_cb17022_c0/flp0/818      | R01_cb17022_c0/flp0/818  | R01_cb17022_c0/flp0/818      | NA                       | NA                          |
| R01_cb2895_c1/flp0/2164      | NA                       | R01_cb2895_c1/flp0/2164      | NA                       | NA                          |
| R01_cb1686_c5/flp0/2279      | NA                       | NA                           | R01_cb1686_c5/flp0/2279  | R01_cb1686_c5/flp0/2279     |
| R01_cb709_c11/flp0/2068      | R01_cb709_c11/flp0/2068  | R01_cb709_c11/flp0/2068      | R01_cb709_c11/flp0/2068  | R01_cb709_c11/flp0/2068     |
| R01_cb15017_c5/flp0/1470     | NA                       | R01_cb15017_c5/flp0/1470     | NA                       | NA                          |
| R01_cb17411_c0/f3p0/1546     | NA                       | R01_cb17411_c0/f3p0/1546     | NA                       | NA                          |
| R01_cb8564_c88457/flp0/2242  | NA                       | R01_cb8564_c88457/flp0/2242  | NA                       | NA                          |
| R01_cb18456_c2339/flp0/916   | NA                       | R01_cb18456_c2339/flp0/916   | NA                       | NA                          |
| R01_cb11244_c1/flp0/2673     | NA                       | R01_cb11244_c1/flp0/2673     | NA                       | NA                          |
| R01_cb7537_c1/f2p1/2157      | NA                       | NA                           | NA                       | R01_cb7537_c1/f2p1/2157     |
| R01_cb4846_c3/flp0/2798      | NA                       | R01_cb4846_c3/flp0/2798      | NA                       | NA                          |
| R01_cb8564_c129754/flp0/2346 | NA                       | R01_cb8564_c129754/flp0/2346 | NA                       | NA                          |
| R01_cb7528_c4/flp0/4063      | NA                       | R01_cb7528_c4/flp0/4063      | NA                       | NA                          |
| R01_cb16718_c5/flp0/401      | R01_cb16718_c5/flp0/401  | R01_cb16718_c5/flp0/401      | R01_cb16718_c5/flp0/401  | R01_cb16718_c5/flp0/401     |
| R01_cb6574_c3/flp0/1915      | NA                       | R01_cb6574_c3/flp0/1915      | R01_cb6574_c3/flp0/1915  | R01_cb6574_c3/flp0/1915     |
| R01_cb8564_c1020/flp0/3486   | NA                       | R01_cb8564_c1020/flp0/3486   | NA                       | R01_cb8564_c1020/flp0/3486  |
| R01_cb11534_c0/flp0/1805     | NA                       | R01_cb11534_c0/flp0/1805     | NA                       | NA                          |

|                             |                             |                             |                             |                             |
|-----------------------------|-----------------------------|-----------------------------|-----------------------------|-----------------------------|
| R01_cb16652_c3/flp0/1316    | NA                          | R01_cb16652_c3/flp0/1316    | NA                          | NA                          |
| R01_cb8564_c85245/flp0/3173 | NA                          | NA                          | NA                          | R01_cb8564_c85245/flp0/3173 |
| R01_cb8564_c40846/flp0/1937 | NA                          | R01_cb8564_c40846/flp0/1937 | NA                          | NA                          |
| R01_cb10217_c3/flp1/1696    | NA                          | NA                          | NA                          | R01_cb10217_c3/flp1/1696    |
| R01_cb10659_c6/flp0/1478    | NA                          | R01_cb10659_c6/flp0/1478    | NA                          | NA                          |
| R01_cb18758_c1/flp0/313     | R01_cb18758_c1/flp0/313     | R01_cb18758_c1/flp0/313     | R01_cb18758_c1/flp0/313     | R01_cb18758_c1/flp0/313     |
| R01_cb8564_c24863/flp0/2842 | R01_cb8564_c24863/flp0/2842 | R01_cb8564_c24863/flp0/2842 | R01_cb8564_c24863/flp0/2842 | R01_cb8564_c24863/flp0/2842 |
| R01_cb9256_c0/flp0/2138     | NA                          | NA                          | NA                          | R01_cb9256_c0/flp0/2138     |
| R01_cb14547_c13/f3p2/698    | NA                          | R01_cb14547_c13/f3p2/698    | NA                          | NA                          |
| R01_cb8279_c10/flp0/2442    | NA                          | NA                          | NA                          | R01_cb8279_c10/flp0/2442    |
| R01_cb9529_c5/flp0/908      | NA                          | NA                          | NA                          | R01_cb9529_c5/flp0/908      |
| R01_cb8564_c36533/flp0/4031 | NA                          | R01_cb8564_c36533/flp0/4031 | NA                          | R01_cb8564_c36533/flp0/4031 |
| R01_cb947_c45/flp0/853      | R01_cb947_c45/flp0/853      | R01_cb947_c45/flp0/853      | R01_cb947_c45/flp0/853      | R01_cb947_c45/flp0/853      |
| R01_cb3745_c0/flp0/3539     | R01_cb3745_c0/flp0/3539     | R01_cb3745_c0/flp0/3539     | R01_cb3745_c0/flp0/3539     | NA                          |
| R01_cb11554_c1/flp0/2411    | NA                          | R01_cb11554_c1/flp0/2411    | NA                          | NA                          |
| R01_cb8564_c16286/flp0/3853 | R01_cb8564_c16286/flp0/3853 | R01_cb8564_c16286/flp0/3853 | R01_cb8564_c16286/flp0/3853 | R01_cb8564_c16286/flp0/3853 |
| R01_cb11542_c1/flp0/2639    | NA                          | NA                          | NA                          | R01_cb11542_c1/flp0/2639    |
| R01_cb17331_c1/flp0/541     | NA                          | NA                          | R01_cb17331_c1/flp0/541     | R01_cb17331_c1/flp0/541     |
| R01_cb12156_c1/f3p1/636     | R01_cb12156_c1/f3p1/636     | R01_cb12156_c1/f3p1/636     | NA                          | NA                          |
| R01_cb7032_c0/flp0/2714     | NA                          | R01_cb7032_c0/flp0/2714     | NA                          | R01_cb7032_c0/flp0/2714     |
| R01_cb10968_c2/flp1/2608    | NA                          | R01_cb10968_c2/flp1/2608    | R01_cb10968_c2/flp1/2608    | R01_cb10968_c2/flp1/2608    |
| R01_cb18456_c2271/flp0/1842 | NA                          | R01_cb18456_c2271/flp0/1842 | NA                          | NA                          |
| R01_cb14578_c1/flp0/1500    | NA                          | R01_cb14578_c1/flp0/1500    | NA                          | NA                          |
| R01_cb8564_c11380/flp0/2676 | NA                          | R01_cb8564_c11380/flp0/2676 | R01_cb8564_c11380/flp0/2676 | NA                          |

|                             |                             |                             |                          |                             |
|-----------------------------|-----------------------------|-----------------------------|--------------------------|-----------------------------|
| R01_cb12070_c0/f1p0/595     | R01_cb12070_c0/f1p0/595     | R01_cb12070_c0/f1p0/595     | R01_cb12070_c0/f1p0/595  | R01_cb12070_c0/f1p0/595     |
| R01_cb18398_c2/f1p0/1588    | NA                          | R01_cb18398_c2/f1p0/1588    | NA                       | NA                          |
| R01_cb18080_c0/f2p0/733     | R01_cb18080_c0/f2p0/733     | R01_cb18080_c0/f2p0/733     | R01_cb18080_c0/f2p0/733  | R01_cb18080_c0/f2p0/733     |
| R01_cb506_c7/f1p0/3519      | NA                          | NA                          | NA                       | R01_cb506_c7/f1p0/3519      |
| R01_cb10010_c2/f1p0/1014    | NA                          | R01_cb10010_c2/f1p0/1014    | R01_cb10010_c2/f1p0/1014 | NA                          |
| R01_cb8564_c13087/f1p1/3138 | NA                          | R01_cb8564_c13087/f1p1/3138 | NA                       | NA                          |
| R01_cb8564_c42049/f1p0/4782 | NA                          | R01_cb8564_c42049/f1p0/4782 | NA                       | NA                          |
| R01_cb8087_c4/f1p0/2454     | NA                          | R01_cb8087_c4/f1p0/2454     | NA                       | NA                          |
| R01_cb16178_c0/f1p0/598     | R01_cb16178_c0/f1p0/598     | R01_cb16178_c0/f1p0/598     | R01_cb16178_c0/f1p0/598  | R01_cb16178_c0/f1p0/598     |
| R01_cb4469_c8/f1p0/2281     | NA                          | NA                          | NA                       | R01_cb4469_c8/f1p0/2281     |
| R01_cb11824_c0/f1p0/678     | R01_cb11824_c0/f1p0/678     | R01_cb11824_c0/f1p0/678     | R01_cb11824_c0/f1p0/678  | R01_cb11824_c0/f1p0/678     |
| R01_cb8564_c24947/f1p0/3141 | NA                          | NA                          | NA                       | R01_cb8564_c24947/f1p0/3141 |
| R01_cb11008_c0/f2p0/547     | R01_cb11008_c0/f2p0/547     | R01_cb11008_c0/f2p0/547     | R01_cb11008_c0/f2p0/547  | R01_cb11008_c0/f2p0/547     |
| R01_cb8564_c75889/f1p0/4082 | R01_cb8564_c75889/f1p0/4082 | R01_cb8564_c75889/f1p0/4082 | NA                       | R01_cb8564_c75889/f1p0/4082 |
| R01_cb12686_c2/f1p0/505     | NA                          | NA                          | NA                       | R01_cb12686_c2/f1p0/505     |
| R01_cb18766_c0/f1p0/5342    | NA                          | R01_cb18766_c0/f1p0/5342    | R01_cb18766_c0/f1p0/5342 | R01_cb18766_c0/f1p0/5342    |
| R01_cb10875_c0/f1p0/1519    | NA                          | R01_cb10875_c0/f1p0/1519    | NA                       | NA                          |
| R01_cb2451_c19/f1p0/3664    | NA                          | NA                          | NA                       | R01_cb2451_c19/f1p0/3664    |
| R01_cb18456_c3750/f1p0/882  | NA                          | R01_cb18456_c3750/f1p0/882  | NA                       | NA                          |
| R01_cb15186_c8/f4p1/543     | R01_cb15186_c8/f4p1/543     | R01_cb15186_c8/f4p1/543     | R01_cb15186_c8/f4p1/543  | NA                          |
| R01_cb14935_c2/f1p0/1520    | R01_cb14935_c2/f1p0/1520    | R01_cb14935_c2/f1p0/1520    | NA                       | R01_cb14935_c2/f1p0/1520    |
| R01_cb13858_c3/f1p0/345     | R01_cb13858_c3/f1p0/345     | R01_cb13858_c3/f1p0/345     | R01_cb13858_c3/f1p0/345  | R01_cb13858_c3/f1p0/345     |
| R01_cb9081_c1/f1p0/2377     | NA                          | NA                          | NA                       | R01_cb9081_c1/f1p0/2377     |
| R01_cb6015_c10/f1p0/1949    | NA                          | R01_cb6015_c10/f1p0/1949    | NA                       | NA                          |
| R01_cb7551_c16/f1p0/704     | R01_cb7551_c16/f1p0/704     | R01_cb7551_c16/f1p0/704     | R01_cb7551_c16/f1p0/704  | R01_cb7551_c16/f1p0/704     |

|                             |                            |                             |                             |                             |
|-----------------------------|----------------------------|-----------------------------|-----------------------------|-----------------------------|
| R01_cb3341_c12/flp0/1697    | NA                         | R01_cb3341_c12/flp0/1697    | NA                          | NA                          |
| R01_cb18456_c1824/flp0/1737 | NA                         | NA                          | R01_cb18456_c1824/flp0/1737 | NA                          |
| R01_cb8564_c47920/flp0/2894 | NA                         | R01_cb8564_c47920/flp0/2894 | NA                          | NA                          |
| R01_cb6204_c12/flp3/2884    | NA                         | NA                          | NA                          | R01_cb6204_c12/flp3/2884    |
| R01_cb1915_c29/flp0/1752    | NA                         | NA                          | NA                          | R01_cb1915_c29/flp0/1752    |
| R01_cb3730_c34/flp0/472     | R01_cb3730_c34/flp0/472    | R01_cb3730_c34/flp0/472     | R01_cb3730_c34/flp0/472     | R01_cb3730_c34/flp0/472     |
| R01_cb13384_c2/f2p0/1153    | NA                         | NA                          | NA                          | R01_cb13384_c2/f2p0/1153    |
| R01_cb2568_c6/flp0/2781     | R01_cb2568_c6/flp0/2781    | R01_cb2568_c6/flp0/2781     | R01_cb2568_c6/flp0/2781     | R01_cb2568_c6/flp0/2781     |
| R01_cb9582_c5/flp0/2027     | NA                         | R01_cb9582_c5/flp0/2027     | NA                          | NA                          |
| R01_cb17204_c0/f2p0/648     | R01_cb17204_c0/f2p0/648    | R01_cb17204_c0/f2p0/648     | NA                          | NA                          |
| R01_cb11148_c4/f2p0/550     | NA                         | R01_cb11148_c4/f2p0/550     | NA                          | R01_cb11148_c4/f2p0/550     |
| R01_cb10664_c1/flp0/2500    | R01_cb10664_c1/flp0/2500   | R01_cb10664_c1/flp0/2500    | R01_cb10664_c1/flp0/2500    | NA                          |
| R01_cb11310_c1/flp0/2474    | R01_cb11310_c1/flp0/2474   | R01_cb11310_c1/flp0/2474    | R01_cb11310_c1/flp0/2474    | R01_cb11310_c1/flp0/2474    |
| R01_cb16134_c2/flp0/1632    | NA                         | R01_cb16134_c2/flp0/1632    | NA                          | NA                          |
| R01_cb5168_c4/flp0/1155     | R01_cb5168_c4/flp0/1155    | R01_cb5168_c4/flp0/1155     | R01_cb5168_c4/flp0/1155     | R01_cb5168_c4/flp0/1155     |
| R01_cb8564_c3874/flp0/2929  | R01_cb8564_c3874/flp0/2929 | R01_cb8564_c3874/flp0/2929  | R01_cb8564_c3874/flp0/2929  | R01_cb8564_c3874/flp0/2929  |
| R01_cb12585_c26/flp0/515    | R01_cb12585_c26/flp0/515   | R01_cb12585_c26/flp0/515    | R01_cb12585_c26/flp0/515    | R01_cb12585_c26/flp0/515    |
| R01_cb8900_c1/flp0/2444     | NA                         | NA                          | NA                          | R01_cb8900_c1/flp0/2444     |
| R01_cb10681_c5/flp0/1069    | NA                         | NA                          | NA                          | R01_cb10681_c5/flp0/1069    |
| R01_cb8564_c48531/flp0/4342 | NA                         | R01_cb8564_c48531/flp0/4342 | NA                          | NA                          |
| R01_cb8564_c120991/flp0/268 | NA                         | R01_cb8564_c120991/flp0/268 | R01_cb8564_c120991/flp0/268 | R01_cb8564_c120991/flp0/268 |
| 7                           | NA                         | 7                           | 7                           | 7                           |
| R01_cb11446_c0/flp0/1380    | NA                         | R01_cb11446_c0/flp0/1380    | NA                          | NA                          |
| R01_cb8564_c79322/flp0/3340 | NA                         | NA                          | NA                          | R01_cb8564_c79322/flp0/3340 |
| R01_cb12063_c7/flp0/1417    | NA                         | NA                          | NA                          | R01_cb12063_c7/flp0/1417    |
| R01_cb8564_c74999/flp0/2465 | NA                         | R01_cb8564_c74999/flp0/2465 | NA                          | NA                          |

|                             |                            |                             |                             |                             |
|-----------------------------|----------------------------|-----------------------------|-----------------------------|-----------------------------|
| R01_cb8564_c4583/f5p0/2597  | NA                         | NA                          | NA                          | R01_cb8564_c4583/f5p0/2597  |
| R01_cb6459_c3/flp0/2915     | NA                         | R01_cb6459_c3/flp0/2915     | NA                          | NA                          |
| R01_cb18456_c7311/flp3/713  | R01_cb18456_c7311/flp3/713 | R01_cb18456_c7311/flp3/713  | NA                          | NA                          |
| R01_cb5233_c0/flp0/3145     | NA                         | R01_cb5233_c0/flp0/3145     | NA                          | NA                          |
| R01_cb8905_c4/flp1/2111     | NA                         | NA                          | NA                          | R01_cb8905_c4/flp1/2111     |
| R01_cb17167_c2/flp0/608     | NA                         | R01_cb17167_c2/flp0/608     | NA                          | NA                          |
| R01_cb17266_c18/flp0/1246   | NA                         | R01_cb17266_c18/flp0/1246   | NA                          | NA                          |
| R01_cb15741_c4/flp0/5541    | R01_cb15741_c4/flp0/5541   | R01_cb15741_c4/flp0/5541    | NA                          | NA                          |
| R01_cb7303_c1/f4p1/2576     | NA                         | NA                          | NA                          | R01_cb7303_c1/f4p1/2576     |
| R01_cb3131_c4/flp0/1505     | NA                         | R01_cb3131_c4/flp0/1505     | NA                          | NA                          |
| R01_cb15003_c0/f4p0/716     | R01_cb15003_c0/f4p0/716    | R01_cb15003_c0/f4p0/716     | R01_cb15003_c0/f4p0/716     | R01_cb15003_c0/f4p0/716     |
| R01_cb4354_c5/f3p1/3366     | NA                         | NA                          | NA                          | R01_cb4354_c5/f3p1/3366     |
| R01_cb2959_c2/flp0/3487     | NA                         | NA                          | NA                          | R01_cb2959_c2/flp0/3487     |
| R01_cb16447_c7/flp1/912     | NA                         | NA                          | R01_cb16447_c7/flp1/912     | R01_cb16447_c7/flp1/912     |
| R01_cb8169_c0/flp0/2438     | NA                         | R01_cb8169_c0/flp0/2438     | NA                          | NA                          |
| R01_cb7693_c1/flp0/2557     | NA                         | NA                          | NA                          | R01_cb7693_c1/flp0/2557     |
| R01_cb17069_c1/flp0/735     | NA                         | R01_cb17069_c1/flp0/735     | NA                          | R01_cb17069_c1/flp0/735     |
| R01_cb5676_c1/f6p0/2903     | NA                         | NA                          | NA                          | R01_cb5676_c1/f6p0/2903     |
| R01_cb6169_c5/flp0/1654     | NA                         | R01_cb6169_c5/flp0/1654     | NA                          | NA                          |
| R01_cb9613_c6/flp0/1672     | NA                         | R01_cb9613_c6/flp0/1672     | NA                          | NA                          |
| R01_cb8564_c24172/flp0/4877 | NA                         | R01_cb8564_c24172/flp0/4877 | R01_cb8564_c24172/flp0/4877 | R01_cb8564_c24172/flp0/4877 |
| R01_cb8564_c13534/flp0/3084 | NA                         | R01_cb8564_c13534/flp0/3084 | NA                          | R01_cb8564_c13534/flp0/3084 |
| R01_cb12273_c5/flp0/1561    | NA                         | NA                          | NA                          | R01_cb12273_c5/flp0/1561    |
| R01_cb9841_c1/flp0/1930     | NA                         | NA                          | NA                          | R01_cb9841_c1/flp0/1930     |
| R01_cb3997_c2/flp0/3489     | NA                         | NA                          | NA                          | R01_cb3997_c2/flp0/3489     |
| R01_cb17537_c3/flp0/1507    | NA                         | R01_cb17537_c3/flp0/1507    | NA                          | NA                          |



|                              |                             |                             |                             |                              |
|------------------------------|-----------------------------|-----------------------------|-----------------------------|------------------------------|
| R01_cb18255_c0/f2p0/863      | R01_cb18255_c0/f2p0/863     | R01_cb18255_c0/f2p0/863     | R01_cb18255_c0/f2p0/863     | R01_cb18255_c0/f2p0/863      |
| R01_cb3381_c6/f2p0/763       | R01_cb3381_c6/f2p0/763      | R01_cb3381_c6/f2p0/763      | R01_cb3381_c6/f2p0/763      | R01_cb3381_c6/f2p0/763       |
| R01_cb4469_c11/f1p0/1822     | NA                          | NA                          | NA                          | R01_cb4469_c11/f1p0/1822     |
| R01_cb14125_c91/f1p0/675     | NA                          | R01_cb14125_c91/f1p0/675    | R01_cb14125_c91/f1p0/675    | NA                           |
| R01_cb135_c47/f1p2/2136      | NA                          | R01_cb135_c47/f1p2/2136     | NA                          | NA                           |
| R01_cb8564_c23949/f1p0/2943  | NA                          | R01_cb8564_c23949/f1p0/2943 | NA                          | R01_cb8564_c23949/f1p0/2943  |
| R01_cb8564_c3877/f1p0/2862   | R01_cb8564_c3877/f1p0/2862  | R01_cb8564_c3877/f1p0/2862  | R01_cb8564_c3877/f1p0/2862  | R01_cb8564_c3877/f1p0/2862   |
| R01_cb17604_c6/f1p0/625      | NA                          | R01_cb17604_c6/f1p0/625     | R01_cb17604_c6/f1p0/625     | R01_cb17604_c6/f1p0/625      |
| R01_cb8564_c1883/f1p0/2869   | NA                          | NA                          | NA                          | R01_cb8564_c1883/f1p0/2869   |
| R01_cb2588_c4/f1p0/540       | R01_cb2588_c4/f1p0/540      | R01_cb2588_c4/f1p0/540      | R01_cb2588_c4/f1p0/540      | R01_cb2588_c4/f1p0/540       |
| R01_cb8564_c21584/f2p5/3932  | NA                          | R01_cb8564_c21584/f2p5/3932 | R01_cb8564_c21584/f2p5/3932 | R01_cb8564_c21584/f2p5/3932  |
| R01_cb18132_c7/f1p0/1239     | NA                          | R01_cb18132_c7/f1p0/1239    | NA                          | NA                           |
| R01_cb5976_c5/f1p0/1263      | NA                          | R01_cb5976_c5/f1p0/1263     | NA                          | R01_cb5976_c5/f1p0/1263      |
| R01_cb8564_c71150/f1p0/2448  | NA                          | R01_cb8564_c71150/f1p0/2448 | NA                          | NA                           |
| R01_cb6740_c10/f1p0/4763     | NA                          | R01_cb6740_c10/f1p0/4763    | NA                          | NA                           |
| R01_cb8564_c71119/f1p0/3003  | R01_cb8564_c71119/f1p0/3003 | R01_cb8564_c71119/f1p0/3003 | R01_cb8564_c71119/f1p0/3003 | R01_cb8564_c71119/f1p0/3003  |
| R01_cb8564_c4479/f1p0/3012   | NA                          | NA                          | NA                          | R01_cb8564_c4479/f1p0/3012   |
| R01_cb15175_c2/f1p0/660      | NA                          | NA                          | NA                          | R01_cb15175_c2/f1p0/660      |
| R01_cb8564_c91619/f1p0/3725  | NA                          | R01_cb8564_c91619/f1p0/3725 | R01_cb8564_c91619/f1p0/3725 | R01_cb8564_c91619/f1p0/3725  |
| R01_cb8564_c123717/f1p0/2918 | NA                          | NA                          | NA                          | R01_cb8564_c123717/f1p0/2918 |
| R01_cb16945_c3/f1p0/1647     | R01_cb16945_c3/f1p0/1647    | R01_cb16945_c3/f1p0/1647    | R01_cb16945_c3/f1p0/1647    | R01_cb16945_c3/f1p0/1647     |
| R01_cb8564_c74104/f1p0/2277  | NA                          | NA                          | NA                          | R01_cb8564_c74104/f1p0/2277  |
| R01_cb8564_c3997/f1p0/2183   | NA                          | NA                          | R01_cb8564_c3997/f1p0/2183  | R01_cb8564_c3997/f1p0/2183   |
| R01_cb412_c4/f1p0/3252       | NA                          | NA                          | NA                          | R01_cb412_c4/f1p0/3252       |

|                             |                            |                            |                            |                             |
|-----------------------------|----------------------------|----------------------------|----------------------------|-----------------------------|
| R01_cb14882_c4/flp1/1019    | NA                         | R01_cb14882_c4/flp1/1019   | NA                         | NA                          |
| R01_cb9805_c0/flp0/1972     | NA                         | R01_cb9805_c0/flp0/1972    | R01_cb9805_c0/flp0/1972    | NA                          |
| R01_cb16470_c0/f6p0/659     | NA                         | R01_cb16470_c0/f6p0/659    | NA                         | NA                          |
| R01_cb7714_c15/flp0/2031    | NA                         | NA                         | NA                         | R01_cb7714_c15/flp0/2031    |
| R01_cb9143_c123/flp0/2290   | NA                         | R01_cb9143_c123/flp0/2290  | NA                         | NA                          |
| R01_cb1610_c1/f2p0/2723     | NA                         | NA                         | NA                         | R01_cb1610_c1/f2p0/2723     |
| R01_cb261_c15/flp0/3068     | NA                         | NA                         | NA                         | R01_cb261_c15/flp0/3068     |
| R01_cb2989_c9/flp0/2038     | NA                         | NA                         | NA                         | R01_cb2989_c9/flp0/2038     |
| R01_cb12767_c13/flp0/1024   | NA                         | NA                         | NA                         | R01_cb12767_c13/flp0/1024   |
| R01_cb16991_c3/flp0/413     | R01_cb16991_c3/flp0/413    | R01_cb16991_c3/flp0/413    | R01_cb16991_c3/flp0/413    | R01_cb16991_c3/flp0/413     |
| R01_cb2160_c6/flp1/3786     | NA                         | NA                         | NA                         | R01_cb2160_c6/flp1/3786     |
| R01_cb18456_c6120/flp0/777  | NA                         | NA                         | NA                         | R01_cb18456_c6120/flp0/777  |
| R01_cb9409_c2/flp0/2056     | NA                         | R01_cb9409_c2/flp0/2056    | NA                         | NA                          |
| R01_cb8582_c0/flp0/2321     | NA                         | R01_cb8582_c0/flp0/2321    | NA                         | R01_cb8582_c0/flp0/2321     |
| R01_cb11261_c2/flp0/2163    | R01_cb11261_c2/flp0/2163   | R01_cb11261_c2/flp0/2163   | NA                         | NA                          |
| R01_cb18409_c81/flp0/1272   | R01_cb18409_c81/flp0/1272  | R01_cb18409_c81/flp0/1272  | R01_cb18409_c81/flp0/1272  | R01_cb18409_c81/flp0/1272   |
| R01_cb10262_c10/flp0/488    | NA                         | R01_cb10262_c10/flp0/488   | R01_cb10262_c10/flp0/488   | R01_cb10262_c10/flp0/488    |
| R01_cb13558_c1/f3p0/631     | NA                         | NA                         | R01_cb13558_c1/f3p0/631    | R01_cb13558_c1/f3p0/631     |
| R01_cb8564_c4109/flp0/2778  | R01_cb8564_c4109/flp0/2778 | R01_cb8564_c4109/flp0/2778 | R01_cb8564_c4109/flp0/2778 | R01_cb8564_c4109/flp0/2778  |
| R01_cb5682_c11/flp0/488     | R01_cb5682_c11/flp0/488    | R01_cb5682_c11/flp0/488    | R01_cb5682_c11/flp0/488    | R01_cb5682_c11/flp0/488     |
| R01_cb1259_c21/flp0/3481    | NA                         | NA                         | NA                         | R01_cb1259_c21/flp0/3481    |
| R01_cb17484_c0/f2p0/1133    | NA                         | NA                         | NA                         | R01_cb17484_c0/f2p0/1133    |
| R01_cb8969_c1/flp0/1893     | NA                         | R01_cb8969_c1/flp0/1893    | R01_cb8969_c1/flp0/1893    | R01_cb8969_c1/flp0/1893     |
| R01_cb8564_c89944/flp0/3176 | NA                         | NA                         | NA                         | R01_cb8564_c89944/flp0/3176 |
| R01_cb4226_c4/flp0/2756     | NA                         | R01_cb4226_c4/flp0/2756    | NA                         | NA                          |
| R01_cb16174_c2/flp0/1199    | NA                         | R01_cb16174_c2/flp0/1199   | NA                         | NA                          |

|                              |                            |                              |                              |                             |
|------------------------------|----------------------------|------------------------------|------------------------------|-----------------------------|
| R01_cb14316_c6/flp0/1839     | R01_cb14316_c6/flp0/1839   | R01_cb14316_c6/flp0/1839     | R01_cb14316_c6/flp0/1839     | R01_cb14316_c6/flp0/1839    |
| R01_cb8564_c130214/flp1/2920 | NA                         | R01_cb8564_c130214/flp1/2920 | R01_cb8564_c130214/flp1/2920 | NA                          |
| R01_cb18456_c7655/flp0/465   | R01_cb18456_c7655/flp0/465 | R01_cb18456_c7655/flp0/465   | R01_cb18456_c7655/flp0/465   | R01_cb18456_c7655/flp0/465  |
| R01_cb8564_c85134/f2p0/2014  | NA                         | R01_cb8564_c85134/f2p0/2014  | R01_cb8564_c85134/f2p0/2014  | R01_cb8564_c85134/f2p0/2014 |
| R01_cb8564_c92362/flp0/3943  | NA                         | R01_cb8564_c92362/flp0/3943  | NA                           | NA                          |
| R01_cb416_c29/flp0/2757      | NA                         | NA                           | NA                           | R01_cb416_c29/flp0/2757     |
| R01_cb12240_c5/flp1/622      | R01_cb12240_c5/flp1/622    | R01_cb12240_c5/flp1/622      | NA                           | NA                          |
| R01_cb8564_c4902/flp0/3303   | NA                         | R01_cb8564_c4902/flp0/3303   | NA                           | R01_cb8564_c4902/flp0/3303  |
| R01_cb7333_c0/f3p0/2980      | NA                         | R01_cb7333_c0/f3p0/2980      | NA                           | R01_cb7333_c0/f3p0/2980     |
| R01_cb1905_c37/flp0/2427     | NA                         | R01_cb1905_c37/flp0/2427     | R01_cb1905_c37/flp0/2427     | NA                          |
| R01_cb8564_c16144/flp0/3618  | NA                         | NA                           | NA                           | R01_cb8564_c16144/flp0/3618 |
| R01_cb14856_c1/flp0/1755     | NA                         | R01_cb14856_c1/flp0/1755     | NA                           | R01_cb14856_c1/flp0/1755    |
| R01_cb16125_c20/flp0/1652    | NA                         | R01_cb16125_c20/flp0/1652    | R01_cb16125_c20/flp0/1652    | R01_cb16125_c20/flp0/1652   |
| R01_cb17904_c0/flp0/610      | R01_cb17904_c0/flp0/610    | R01_cb17904_c0/flp0/610      | R01_cb17904_c0/flp0/610      | R01_cb17904_c0/flp0/610     |
| R01_cb2804_c99/flp0/2179     | NA                         | R01_cb2804_c99/flp0/2179     | NA                           | NA                          |
| R01_cb18456_c7473/flp0/1338  | NA                         | NA                           | NA                           | R01_cb18456_c7473/flp0/1338 |
| R01_cb8160_c0/flp1/2444      | NA                         | NA                           | NA                           | R01_cb8160_c0/flp1/2444     |
| R01_cb18508_c1/flp0/314      | R01_cb18508_c1/flp0/314    | R01_cb18508_c1/flp0/314      | R01_cb18508_c1/flp0/314      | R01_cb18508_c1/flp0/314     |
| R01_cb12473_c3/flp0/659      | NA                         | R01_cb12473_c3/flp0/659      | R01_cb12473_c3/flp0/659      | R01_cb12473_c3/flp0/659     |
| R01_cb16022_c1/flp0/1359     | NA                         | R01_cb16022_c1/flp0/1359     | NA                           | NA                          |
| R01_cb10083_c11/flp0/1261    | NA                         | R01_cb10083_c11/flp0/1261    | NA                           | NA                          |
| R01_cb6779_c1/f3p0/1914      | NA                         | NA                           | NA                           | R01_cb6779_c1/f3p0/1914     |
| R01_cb2807_c3/flp0/1894      | R01_cb2807_c3/flp0/1894    | R01_cb2807_c3/flp0/1894      | R01_cb2807_c3/flp0/1894      | R01_cb2807_c3/flp0/1894     |
| R01_cb7441_c9/flp0/1153      | NA                         | NA                           | NA                           | R01_cb7441_c9/flp0/1153     |
| R01_cb5807_c9/flp0/464       | NA                         | R01_cb5807_c9/flp0/464       | NA                           | NA                          |

|                              |                             |                             |                             |                              |
|------------------------------|-----------------------------|-----------------------------|-----------------------------|------------------------------|
| R01_cb8564_c145443/f2p0/2287 | NA                          | NA                          | NA                          | R01_cb8564_c145443/f2p0/2287 |
| R01_cb124_c19/f1p0/3959      | NA                          | NA                          | NA                          | R01_cb124_c19/f1p0/3959      |
| R01_cb18456_c7368/f1p0/1505  | NA                          | R01_cb18456_c7368/f1p0/1505 | R01_cb18456_c7368/f1p0/1505 | R01_cb18456_c7368/f1p0/1505  |
| R01_cb8564_c36226/f1p0/3283  | R01_cb8564_c36226/f1p0/3283 | R01_cb8564_c36226/f1p0/3283 | R01_cb8564_c36226/f1p0/3283 | R01_cb8564_c36226/f1p0/3283  |
| R01_cb3848_c15/f1p0/2348     | NA                          | NA                          | NA                          | R01_cb3848_c15/f1p0/2348     |
| R01_cb5502_c3/f1p1/3086      | NA                          | NA                          | NA                          | R01_cb5502_c3/f1p1/3086      |
| R01_cb380_c8/f1p1/4390       | NA                          | R01_cb380_c8/f1p1/4390      | NA                          | NA                           |
| R01_cb15207_c80/f1p0/981     | NA                          | R01_cb15207_c80/f1p0/981    | NA                          | NA                           |
| R01_cb9606_c65/f1p0/1786     | NA                          | R01_cb9606_c65/f1p0/1786    | NA                          | R01_cb9606_c65/f1p0/1786     |
| R01_cb8564_c81222/f1p0/2638  | NA                          | NA                          | NA                          | R01_cb8564_c81222/f1p0/2638  |
| R01_cb8564_c4652/f3p0/3053   | R01_cb8564_c4652/f3p0/3053  | R01_cb8564_c4652/f3p0/3053  | NA                          | R01_cb8564_c4652/f3p0/3053   |
| R01_cb8564_c23979/f1p0/4568  | NA                          | R01_cb8564_c23979/f1p0/4568 | NA                          | R01_cb8564_c23979/f1p0/4568  |
| R01_cb17973_c1/f7p0/508      | R01_cb17973_c1/f7p0/508     | R01_cb17973_c1/f7p0/508     | R01_cb17973_c1/f7p0/508     | R01_cb17973_c1/f7p0/508      |
| R01_cb17363_c7/f1p1/571      | R01_cb17363_c7/f1p1/571     | R01_cb17363_c7/f1p1/571     | R01_cb17363_c7/f1p1/571     | R01_cb17363_c7/f1p1/571      |
| R01_cb11709_c2/f1p0/1396     | NA                          | NA                          | NA                          | R01_cb11709_c2/f1p0/1396     |
| R01_cb5755_c12/f1p0/2708     | NA                          | NA                          | NA                          | R01_cb5755_c12/f1p0/2708     |
| R01_cb6534_c3/f1p0/723       | NA                          | NA                          | NA                          | R01_cb6534_c3/f1p0/723       |
| R01_cb8564_c50670/f1p0/3680  | NA                          | R01_cb8564_c50670/f1p0/3680 | NA                          | R01_cb8564_c50670/f1p0/3680  |
| R01_cb6285_c0/f1p0/2892      | R01_cb6285_c0/f1p0/2892     | R01_cb6285_c0/f1p0/2892     | R01_cb6285_c0/f1p0/2892     | R01_cb6285_c0/f1p0/2892      |
| R01_cb8564_c4217/f1p0/4767   | NA                          | NA                          | R01_cb8564_c4217/f1p0/4767  | R01_cb8564_c4217/f1p0/4767   |
| R01_cb16945_c0/f1p0/1426     | R01_cb16945_c0/f1p0/1426    | R01_cb16945_c0/f1p0/1426    | R01_cb16945_c0/f1p0/1426    | R01_cb16945_c0/f1p0/1426     |
| R01_cb17354_c1/f1p0/1440     | NA                          | NA                          | NA                          | R01_cb17354_c1/f1p0/1440     |
| R01_cb3026_c0/f3p0/578       | NA                          | R01_cb3026_c0/f3p0/578      | NA                          | NA                           |
| R01_cb8564_c109812/f2p1/368  | NA                          | NA                          | NA                          | R01_cb8564_c109812/f2p1/368  |

| 7                           |                             |                             |                             | 7                           |  |  |  |
|-----------------------------|-----------------------------|-----------------------------|-----------------------------|-----------------------------|--|--|--|
| R01_cb8198_c5/flp1/1990     | NA                          | NA                          | NA                          | R01_cb8198_c5/flp1/1990     |  |  |  |
| R01_cb5943_c9/f4p0/1361     | NA                          | NA                          | NA                          | R01_cb5943_c9/f4p0/1361     |  |  |  |
| R01_cb4249_c9/flp0/631      | NA                          | NA                          | NA                          | R01_cb4249_c9/flp0/631      |  |  |  |
| R01_cb5632_c9/flp0/3493     | NA                          | R01_cb5632_c9/flp0/3493     | NA                          | NA                          |  |  |  |
| R01_cb13786_c0/f2p0/596     | NA                          | NA                          | NA                          | R01_cb13786_c0/f2p0/596     |  |  |  |
| R01_cb3848_c1/f4p0/2367     | NA                          | NA                          | NA                          | R01_cb3848_c1/f4p0/2367     |  |  |  |
| R01_cb8564_c77662/flp0/3894 | NA                          | R01_cb8564_c77662/flp0/3894 | NA                          | NA                          |  |  |  |
| R01_cb8564_c14552/flp0/2951 | R01_cb8564_c14552/flp0/2951 | R01_cb8564_c14552/flp0/2951 | R01_cb8564_c14552/flp0/2951 | R01_cb8564_c14552/flp0/2951 |  |  |  |
| R01_cb12696_c18/flp3/711    | NA                          | R01_cb12696_c18/flp3/711    | NA                          | NA                          |  |  |  |
| R01_cb15676_c2/flp0/1197    | NA                          | NA                          | NA                          | R01_cb15676_c2/flp0/1197    |  |  |  |
| R01_cb12008_c2/flp0/1640    | NA                          | NA                          | NA                          | R01_cb12008_c2/flp0/1640    |  |  |  |
| R01_cb2845_c17/flp0/3838    | NA                          | NA                          | NA                          | R01_cb2845_c17/flp0/3838    |  |  |  |
| R01_cb17196_c0/flp0/735     | NA                          | R01_cb17196_c0/flp0/735     | R01_cb17196_c0/flp0/735     | R01_cb17196_c0/flp0/735     |  |  |  |
| R01_cb8564_c51796/flp0/2631 | R01_cb8564_c51796/flp0/2631 | R01_cb8564_c51796/flp0/2631 | R01_cb8564_c51796/flp0/2631 | R01_cb8564_c51796/flp0/2631 |  |  |  |
| R01_cb13768_c23/flp0/439    | NA                          | R01_cb13768_c23/flp0/439    | NA                          | NA                          |  |  |  |
| R01_cb3582_c6/flp1/2497     | NA                          | NA                          | NA                          | R01_cb3582_c6/flp1/2497     |  |  |  |
| R01_cb18836_c1/flp0/5315    | NA                          | NA                          | NA                          | R01_cb18836_c1/flp0/5315    |  |  |  |
| R01_cb4380_c9/flp0/962      | NA                          | NA                          | NA                          | R01_cb4380_c9/flp0/962      |  |  |  |
| R01_cb11361_c1/f3p0/872     | NA                          | NA                          | NA                          | R01_cb11361_c1/f3p0/872     |  |  |  |
| R01_cb11117_c2/flp1/3308    | NA                          | R01_cb11117_c2/flp1/3308    | NA                          | NA                          |  |  |  |
| R01_cb10720_c1/flp0/2161    | NA                          | R01_cb10720_c1/flp0/2161    | NA                          | R01_cb10720_c1/flp0/2161    |  |  |  |
| R01_cb10630_c1/flp0/3182    | R01_cb10630_c1/flp0/3182    | NA                          | NA                          | NA                          |  |  |  |
| R01_cb14329_c0/f3p0/837     | R01_cb14329_c0/f3p0/837     | NA                          | NA                          | NA                          |  |  |  |

|                             |                           |                             |                          |                             |
|-----------------------------|---------------------------|-----------------------------|--------------------------|-----------------------------|
| R01_cb11924_c10/f3p0/486    | NA                        | R01_cb11924_c10/f3p0/486    | R01_cb11924_c10/f3p0/486 | NA                          |
| R01_cb17347_c3/flp0/873     | NA                        | NA                          | NA                       | R01_cb17347_c3/flp0/873     |
| R01_cb14761_c4/flp0/799     | NA                        | R01_cb14761_c4/flp0/799     | R01_cb14761_c4/flp0/799  | NA                          |
| R01_cb14329_c5/flp0/872     | R01_cb14329_c5/flp0/872   | NA                          | NA                       | NA                          |
| R01_cb8564_c78456/flp0/2589 | NA                        | R01_cb8564_c78456/flp0/2589 | NA                       | NA                          |
| R01_cb8564_c69240/f4p0/4134 | NA                        | NA                          | NA                       | R01_cb8564_c69240/f4p0/4134 |
| R01_cb1095_c11/flp0/3070    | NA                        | NA                          | NA                       | R01_cb1095_c11/flp0/3070    |
| R01_cb7642_c212/flp4/1760   | NA                        | R01_cb7642_c212/flp4/1760   | NA                       | NA                          |
| R01_cb11975_c2/flp1/962     | NA                        | R01_cb11975_c2/flp1/962     | R01_cb11975_c2/flp1/962  | R01_cb11975_c2/flp1/962     |
| R01_cb10182_c0/flp0/1487    | NA                        | R01_cb10182_c0/flp0/1487    | NA                       | NA                          |
| R01_cb8682_c2/flp0/2252     | NA                        | R01_cb8682_c2/flp0/2252     | NA                       | NA                          |
| R01_cb15252_c12/flp0/3614   | NA                        | NA                          | NA                       | R01_cb15252_c12/flp0/3614   |
| R01_cb9_c3/flp0/2562        | NA                        | R01_cb9_c3/flp0/2562        | NA                       | NA                          |
| R01_cb18372_c16/flp0/2987   | R01_cb18372_c16/flp0/2987 | R01_cb18372_c16/flp0/2987   | NA                       | NA                          |
| R01_cb2538_c3/flp0/1585     | NA                        | NA                          | NA                       | R01_cb2538_c3/flp0/1585     |
| R01_cb18666_c1/flp0/1263    | NA                        | R01_cb18666_c1/flp0/1263    | R01_cb18666_c1/flp0/1263 | R01_cb18666_c1/flp0/1263    |
| R01_cb5904_c11/flp0/1421    | NA                        | R01_cb5904_c11/flp0/1421    | NA                       | NA                          |
| R01_cb10071_c2/flp0/1614    | R01_cb10071_c2/flp0/1614  | R01_cb10071_c2/flp0/1614    | R01_cb10071_c2/flp0/1614 | R01_cb10071_c2/flp0/1614    |
| R01_cb115_c1/flp0/4742      | NA                        | NA                          | NA                       | R01_cb115_c1/flp0/4742      |
| R01_cb7268_c3/flp3/2423     | NA                        | NA                          | R01_cb7268_c3/flp3/2423  | NA                          |
| R01_cb9192_c2/flp0/2582     | NA                        | NA                          | NA                       | R01_cb9192_c2/flp0/2582     |
| R01_cb1935_c24/flp0/881     | NA                        | R01_cb1935_c24/flp0/881     | NA                       | R01_cb1935_c24/flp0/881     |
| R01_cb17079_c0/flp0/1488    | NA                        | R01_cb17079_c0/flp0/1488    | NA                       | NA                          |
| R01_cb11715_c1/flp0/2823    | NA                        | R01_cb11715_c1/flp0/2823    | NA                       | NA                          |
| R01_cb7392_c0/f2p0/2457     | NA                        | NA                          | NA                       | R01_cb7392_c0/f2p0/2457     |
| R01_cb13938_c20/flp0/1134   | NA                        | NA                          | NA                       | R01_cb13938_c20/flp0/1134   |

|                              |                          |                             |                            |                              |
|------------------------------|--------------------------|-----------------------------|----------------------------|------------------------------|
| R01_cb10873_c1/flp0/3029     | NA                       | NA                          | NA                         | R01_cb10873_c1/flp0/3029     |
| R01_cb7419_c5/flp1/2191      | NA                       | NA                          | NA                         | R01_cb7419_c5/flp1/2191      |
| R01_cb1248_c5/flp0/6631      | NA                       | NA                          | NA                         | R01_cb1248_c5/flp0/6631      |
| R01_cb14455_c18/flp0/421     | R01_cb14455_c18/flp0/421 | R01_cb14455_c18/flp0/421    | R01_cb14455_c18/flp0/421   | R01_cb14455_c18/flp0/421     |
| R01_cb1849_c15/flp1/2085     | NA                       | NA                          | NA                         | R01_cb1849_c15/flp1/2085     |
| R01_cb1508_c10/flp0/1976     | NA                       | NA                          | NA                         | R01_cb1508_c10/flp0/1976     |
| R01_cb10800_c4/flp0/1517     | NA                       | NA                          | NA                         | R01_cb10800_c4/flp0/1517     |
| R01_cb666_c2/flp0/2897       | NA                       | NA                          | NA                         | R01_cb666_c2/flp0/2897       |
| R01_cb7595_c17/flp0/834      | NA                       | R01_cb7595_c17/flp0/834     | NA                         | NA                           |
| R01_cb15834_c1/flp0/681      | NA                       | NA                          | NA                         | R01_cb15834_c1/flp0/681      |
| R01_cb8564_c54093/flp1/2870  | NA                       | R01_cb8564_c54093/flp1/2870 | NA                         | NA                           |
| R01_cb11790_c0/flp0/1881     | NA                       | R01_cb11790_c0/flp0/1881    | NA                         | NA                           |
| R01_cb6865_c15/flp0/2248     | NA                       | R01_cb6865_c15/flp0/2248    | NA                         | NA                           |
| R01_cb16397_c1/flp0/607      | R01_cb16397_c1/flp0/607  | R01_cb16397_c1/flp0/607     | R01_cb16397_c1/flp0/607    | R01_cb16397_c1/flp0/607      |
| R01_cb8564_c123053/flp1/2096 | NA                       | NA                          | NA                         | R01_cb8564_c123053/flp1/2096 |
| R01_cb13979_c7/flp0/1231     | R01_cb13979_c7/flp0/1231 | NA                          | NA                         | NA                           |
| R01_cb12273_c2/flp0/1623     | NA                       | NA                          | NA                         | R01_cb12273_c2/flp0/1623     |
| R01_cb8564_c789/f3p0/2586    | NA                       | R01_cb8564_c789/f3p0/2586   | R01_cb8564_c789/f3p0/2586  | NA                           |
| R01_cb4117_c1/f2p0/2944      | NA                       | NA                          | NA                         | R01_cb4117_c1/f2p0/2944      |
| R01_cb8564_c11613/flp0/2758  | NA                       | R01_cb8564_c11613/flp0/2758 | NA                         | NA                           |
| R01_cb16452_c4/flp0/684      | NA                       | R01_cb16452_c4/flp0/684     | R01_cb16452_c4/flp0/684    | R01_cb16452_c4/flp0/684      |
| R01_cb16098_c3/f3p0/754      | R01_cb16098_c3/f3p0/754  | R01_cb16098_c3/f3p0/754     | R01_cb16098_c3/f3p0/754    | R01_cb16098_c3/f3p0/754      |
| R01_cb8564_c9884/f2p0/2565   | NA                       | R01_cb8564_c9884/f2p0/2565  | R01_cb8564_c9884/f2p0/2565 | R01_cb8564_c9884/f2p0/2565   |
| R01_cb13103_c2/flp0/464      | R01_cb13103_c2/flp0/464  | R01_cb13103_c2/flp0/464     | R01_cb13103_c2/flp0/464    | R01_cb13103_c2/flp0/464      |
| R01_cb1093_c0/flp0/4471      | NA                       | NA                          | NA                         | R01_cb1093_c0/flp0/4471      |

|                              |                              |                              |                              |                              |
|------------------------------|------------------------------|------------------------------|------------------------------|------------------------------|
| R01_cb2451_c18/flp0/2265     | NA                           | NA                           | NA                           | R01_cb2451_c18/flp0/2265     |
| R01_cb8564_c23602/flp0/2921  | NA                           | R01_cb8564_c23602/flp0/2921  | R01_cb8564_c23602/flp0/2921  | R01_cb8564_c23602/flp0/2921  |
| R01_cb8564_c23111/flp0/4221  | NA                           | NA                           | NA                           | R01_cb8564_c23111/flp0/4221  |
| R01_cb8564_c34188/f2p3/4546  | NA                           | NA                           | NA                           | R01_cb8564_c34188/f2p3/4546  |
| R01_cb8564_c89386/flp0/2244  | NA                           | R01_cb8564_c89386/flp0/2244  | NA                           | NA                           |
| R01_cb12785_c20/flp0/359     | R01_cb12785_c20/flp0/359     | R01_cb12785_c20/flp0/359     | R01_cb12785_c20/flp0/359     | R01_cb12785_c20/flp0/359     |
| R01_cb8564_c78565/flp1/2318  | NA                           | R01_cb8564_c78565/flp1/2318  | NA                           | NA                           |
| R01_cb12498_c3/flp0/739      | NA                           | R01_cb12498_c3/flp0/739      | NA                           | NA                           |
| R01_cb13141_c0/f2p0/950      | NA                           | R01_cb13141_c0/f2p0/950      | NA                           | NA                           |
| R01_cb391_c4/flp0/4291       | NA                           | NA                           | NA                           | R01_cb391_c4/flp0/4291       |
| R01_cb4600_c14/flp0/2035     | NA                           | NA                           | NA                           | R01_cb4600_c14/flp0/2035     |
| R01_cb5811_c6/flp0/1837      | NA                           | R01_cb5811_c6/flp0/1837      | NA                           | NA                           |
| R01_cb13284_c8/flp0/1100     | NA                           | NA                           | NA                           | R01_cb13284_c8/flp0/1100     |
| R01_cb8564_c109382/flp1/2939 | R01_cb8564_c109382/flp1/2939 | R01_cb8564_c109382/flp1/2939 | R01_cb8564_c109382/flp1/2939 | R01_cb8564_c109382/flp1/2939 |
| R01_cb1905_c23/flp0/2032     | NA                           | R01_cb1905_c23/flp0/2032     | R01_cb1905_c23/flp0/2032     | NA                           |
| R01_cb8564_c16240/flp3/2671  | NA                           | NA                           | NA                           | R01_cb8564_c16240/flp3/2671  |
| R01_cb10101_c4/flp0/420      | NA                           | R01_cb10101_c4/flp0/420      | NA                           | R01_cb10101_c4/flp0/420      |
| R01_cb1307_c22/flp0/4955     | R01_cb1307_c22/flp0/4955     | R01_cb1307_c22/flp0/4955     | R01_cb1307_c22/flp0/4955     | R01_cb1307_c22/flp0/4955     |
| R01_cb8564_c119262/flp0/2228 | NA                           | R01_cb8564_c119262/flp0/2228 | R01_cb8564_c119262/flp0/2228 | R01_cb8564_c119262/flp0/2228 |
| R01_cb18409_c114/flp0/474    | R01_cb18409_c114/flp0/474    | R01_cb18409_c114/flp0/474    | R01_cb18409_c114/flp0/474    | R01_cb18409_c114/flp0/474    |
| R01_cb18236_c1/flp0/752      | NA                           | R01_cb18236_c1/flp0/752      | NA                           | R01_cb18236_c1/flp0/752      |
| R01_cb17394_c1/flp0/1029     | NA                           | NA                           | NA                           | R01_cb17394_c1/flp0/1029     |
| R01_cb9178_c0/flp0/2147      | NA                           | R01_cb9178_c0/flp0/2147      | R01_cb9178_c0/flp0/2147      | NA                           |
| R01_cb1779_c6/flp0/3786      | NA                           | NA                           | NA                           | R01_cb1779_c6/flp0/3786      |



|                              |                             |                              |                              |                              |
|------------------------------|-----------------------------|------------------------------|------------------------------|------------------------------|
| R01_cb4233_c73/flp0/3408     | NA                          | R01_cb4233_c73/flp0/3408     | NA                           | NA                           |
| R01_cb6377_c0/flp0/2879      | NA                          | NA                           | NA                           | R01_cb6377_c0/flp0/2879      |
| R01_cb8564_c72601/flp0/2783  | R01_cb8564_c72601/flp0/2783 | R01_cb8564_c72601/flp0/2783  | R01_cb8564_c72601/flp0/2783  | R01_cb8564_c72601/flp0/2783  |
| R01_cb15425_c2/flp0/527      | NA                          | R01_cb15425_c2/flp0/527      | NA                           | NA                           |
| R01_cb8564_c115403/flp0/2492 | NA                          | R01_cb8564_c115403/flp0/2492 | R01_cb8564_c115403/flp0/2492 | R01_cb8564_c115403/flp0/2492 |
| R01_cb18456_c6817/flp0/528   | NA                          | R01_cb18456_c6817/flp0/528   | R01_cb18456_c6817/flp0/528   | NA                           |
| R01_cb14922_c2/flp0/900      | NA                          | NA                           | NA                           | R01_cb14922_c2/flp0/900      |
| R01_cb3922_c8/flp0/4175      | NA                          | R01_cb3922_c8/flp0/4175      | NA                           | NA                           |
| R01_cb16612_c0/f2p0/562      | NA                          | R01_cb16612_c0/f2p0/562      | NA                           | NA                           |
| R01_cb18224_c2/flp0/1671     | NA                          | NA                           | NA                           | R01_cb18224_c2/flp0/1671     |
| R01_cb8564_c70172/flp0/2498  | R01_cb8564_c70172/flp0/2498 | R01_cb8564_c70172/flp0/2498  | R01_cb8564_c70172/flp0/2498  | R01_cb8564_c70172/flp0/2498  |
| R01_cb4230_c2/flp0/2518      | R01_cb4230_c2/flp0/2518     | R01_cb4230_c2/flp0/2518      | R01_cb4230_c2/flp0/2518      | R01_cb4230_c2/flp0/2518      |
| R01_cb7693_c7/flp0/5458      | NA                          | R01_cb7693_c7/flp0/5458      | R01_cb7693_c7/flp0/5458      | R01_cb7693_c7/flp0/5458      |
| R01_cb8564_c70200/flp0/3569  | NA                          | R01_cb8564_c70200/flp0/3569  | R01_cb8564_c70200/flp0/3569  | R01_cb8564_c70200/flp0/3569  |
| R01_cb8007_c1/flp0/2733      | R01_cb8007_c1/flp0/2733     | R01_cb8007_c1/flp0/2733      | NA                           | NA                           |
| R01_cb3464_c5/flp0/2790      | NA                          | NA                           | NA                           | R01_cb3464_c5/flp0/2790      |
| R01_cb12722_c19/flp2/1665    | NA                          | NA                           | NA                           | R01_cb12722_c19/flp2/1665    |
| R01_cb16387_c9/flp0/1504     | NA                          | NA                           | NA                           | R01_cb16387_c9/flp0/1504     |
| R01_cb7304_c0/f2p0/2239      | NA                          | NA                           | NA                           | R01_cb7304_c0/f2p0/2239      |
| R01_cb18395_c1/flp0/706      | NA                          | R01_cb18395_c1/flp0/706      | R01_cb18395_c1/flp0/706      | R01_cb18395_c1/flp0/706      |
| R01_cb10133_c6/flp1/1304     | NA                          | NA                           | NA                           | R01_cb10133_c6/flp1/1304     |
| R01_cb6802_c61/flp0/2216     | R01_cb6802_c61/flp0/2216    | R01_cb6802_c61/flp0/2216     | R01_cb6802_c61/flp0/2216     | R01_cb6802_c61/flp0/2216     |
| R01_cb5775_c4/flp0/2914      | NA                          | R01_cb5775_c4/flp0/2914      | NA                           | R01_cb5775_c4/flp0/2914      |

|                                  |                                  |                                  |                             |                             |
|----------------------------------|----------------------------------|----------------------------------|-----------------------------|-----------------------------|
| R01_cb8388_c4/flp0/1967          | NA                               | R01_cb8388_c4/flp0/1967          | NA                          | NA                          |
| R01_cb11698_c0/flp0/1039         | NA                               | NA                               | NA                          | R01_cb11698_c0/flp0/1039    |
| R01_cb8564_c49791/flp0/4590      | NA                               | NA                               | NA                          | R01_cb8564_c49791/flp0/4590 |
| R01_cb16125_c11/flp0/1851        | NA                               | R01_cb16125_c11/flp0/1851        | NA                          | R01_cb16125_c11/flp0/1851   |
| R01_cb10024_c300/flp3/1162       | NA                               | NA                               | R01_cb10024_c300/flp3/1162  | NA                          |
| R01_cb3483_c24/flp0/2925         | NA                               | NA                               | NA                          | R01_cb3483_c24/flp0/2925    |
| R01_cb1238_c18/flp0/1027         | R01_cb1238_c18/flp0/1027         | R01_cb1238_c18/flp0/1027         | R01_cb1238_c18/flp0/1027    | R01_cb1238_c18/flp0/1027    |
| R01_cb17106_c2/flp0/1644         | NA                               | R01_cb17106_c2/flp0/1644         | R01_cb17106_c2/flp0/1644    | R01_cb17106_c2/flp0/1644    |
| R01_cb69_c24/flp0/3522           | NA                               | NA                               | NA                          | R01_cb69_c24/flp0/3522      |
| R01_cb10254_c0/flp0/657          | NA                               | R01_cb10254_c0/flp0/657          | R01_cb10254_c0/flp0/657     | R01_cb10254_c0/flp0/657     |
| R01_cb15655_c1/flp0/1850         | NA                               | R01_cb15655_c1/flp0/1850         | NA                          | NA                          |
| R01_cb8564_c119177/flp0/213<br>2 | NA                               | R01_cb8564_c119177/flp0/213<br>2 | NA                          | NA                          |
| R01_cb8564_c23677/flp0/2303      | R01_cb8564_c23677/flp0/2303<br>3 | R01_cb8564_c23677/flp0/2303      | R01_cb8564_c23677/flp0/2303 | R01_cb8564_c23677/flp0/2303 |
| R01_cb8564_c3951/flp0/3719       | NA                               | R01_cb8564_c3951/flp0/3719       | NA                          | R01_cb8564_c3951/flp0/3719  |
| R01_cb3046_c10/flp0/2958         | NA                               | NA                               | NA                          | R01_cb3046_c10/flp0/2958    |
| R01_cb10292_c2/flp0/3157         | NA                               | R01_cb10292_c2/flp0/3157         | NA                          | R01_cb10292_c2/flp0/3157    |
| R01_cb3745_c2/flp0/3392          | NA                               | R01_cb3745_c2/flp0/3392          | R01_cb3745_c2/flp0/3392     | NA                          |
| R01_cb12294_c4/f4p0/614          | NA                               | R01_cb12294_c4/f4p0/614          | NA                          | NA                          |
| R01_cb506_c11/flp1/4629          | NA                               | NA                               | NA                          | R01_cb506_c11/flp1/4629     |
| R01_cb8564_c72148/f3p0/3260      | NA                               | R01_cb8564_c72148/f3p0/3260      | R01_cb8564_c72148/f3p0/3260 | NA                          |
| R01_cb12151_c12/flp0/723         | NA                               | R01_cb12151_c12/flp0/723         | NA                          | NA                          |
| R01_cb6069_c2/flp0/2944          | NA                               | NA                               | NA                          | R01_cb6069_c2/flp0/2944     |
| R01_cb14480_c7/flp0/1514         | R01_cb14480_c7/flp0/1514         | R01_cb14480_c7/flp0/1514         | NA                          | R01_cb14480_c7/flp0/1514    |
| R01_cb9552_c4/flp0/2192          | NA                               | NA                               | NA                          | R01_cb9552_c4/flp0/2192     |

|                             |                            |                             |                             |                            |
|-----------------------------|----------------------------|-----------------------------|-----------------------------|----------------------------|
| R01_cb5174_c23/flp0/1396    | NA                         | R01_cb5174_c23/flp0/1396    | NA                          | R01_cb5174_c23/flp0/1396   |
| R01_cb9079_c11/flp0/1031    | NA                         | NA                          | R01_cb9079_c11/flp0/1031    | NA                         |
| R01_cb11455_c4/f2p0/498     | NA                         | R01_cb11455_c4/f2p0/498     | NA                          | R01_cb11455_c4/f2p0/498    |
| R01_cb3760_c5/flp0/3536     | NA                         | NA                          | NA                          | R01_cb3760_c5/flp0/3536    |
| R01_cb18433_c1/flp0/877     | R01_cb18433_c1/flp0/877    | R01_cb18433_c1/flp0/877     | NA                          | R01_cb18433_c1/flp0/877    |
| R01_cb17706_c1/f3p0/569     | R01_cb17706_c1/f3p0/569    | R01_cb17706_c1/f3p0/569     | R01_cb17706_c1/f3p0/569     | R01_cb17706_c1/f3p0/569    |
| R01_cb8564_c85845/flp0/2281 | NA                         | NA                          | R01_cb8564_c85845/flp0/2281 | NA                         |
| R01_cb15337_c3/flp0/1784    | NA                         | NA                          | NA                          | R01_cb15337_c3/flp0/1784   |
| R01_cb10337_c1/flp2/1924    | R01_cb10337_c1/flp2/1924   | R01_cb10337_c1/flp2/1924    | NA                          | NA                         |
| R01_cb18456_c7213/flp0/693  | R01_cb18456_c7213/flp0/693 | R01_cb18456_c7213/flp0/693  | R01_cb18456_c7213/flp0/693  | R01_cb18456_c7213/flp0/693 |
| R01_cb3750_c5/f2p2/2925     | NA                         | NA                          | NA                          | R01_cb3750_c5/f2p2/2925    |
| R01_cb17483_c1/flp0/537     | R01_cb17483_c1/flp0/537    | R01_cb17483_c1/flp0/537     | R01_cb17483_c1/flp0/537     | R01_cb17483_c1/flp0/537    |
| R01_cb1533_c5/flp0/2746     | NA                         | R01_cb1533_c5/flp0/2746     | NA                          | NA                         |
| R01_cb18223_c21/flp0/481    | R01_cb18223_c21/flp0/481   | R01_cb18223_c21/flp0/481    | R01_cb18223_c21/flp0/481    | R01_cb18223_c21/flp0/481   |
| R01_cb16125_c23/flp0/585    | R01_cb16125_c23/flp0/585   | R01_cb16125_c23/flp0/585    | R01_cb16125_c23/flp0/585    | R01_cb16125_c23/flp0/585   |
| R01_cb15751_c0/flp0/1852    | R01_cb15751_c0/flp0/1852   | R01_cb15751_c0/flp0/1852    | R01_cb15751_c0/flp0/1852    | R01_cb15751_c0/flp0/1852   |
| R01_cb8564_c1409/flp0/2948  | R01_cb8564_c1409/flp0/2948 | R01_cb8564_c1409/flp0/2948  | NA                          | NA                         |
| R01_cb15034_c1/flp0/1224    | R01_cb15034_c1/flp0/1224   | R01_cb15034_c1/flp0/1224    | NA                          | R01_cb15034_c1/flp0/1224   |
| R01_cb8564_c36768/flp0/4007 | NA                         | R01_cb8564_c36768/flp0/4007 | NA                          | NA                         |
| R01_cb1788_c1/flp0/3299     | NA                         | NA                          | NA                          | R01_cb1788_c1/flp0/3299    |
| R01_cb3703_c0/f3p1/3550     | NA                         | NA                          | NA                          | R01_cb3703_c0/f3p1/3550    |
| R01_cb12059_c9/flp4/1010    | NA                         | R01_cb12059_c9/flp4/1010    | NA                          | NA                         |
| R01_cb10058_c6/f2p1/1685    | NA                         | R01_cb10058_c6/f2p1/1685    | NA                          | NA                         |
| R01_cb10353_c0/flp0/636     | NA                         | R01_cb10353_c0/flp0/636     | R01_cb10353_c0/flp0/636     | NA                         |
| R01_cb7612_c3/flp1/2038     | NA                         | NA                          | NA                          | R01_cb7612_c3/flp1/2038    |
| R01_cb8564_c52680/flp0/2870 | NA                         | R01_cb8564_c52680/flp0/2870 | R01_cb8564_c52680/flp0/2870 | NA                         |

|                              |                                  |                              |                             |                             |
|------------------------------|----------------------------------|------------------------------|-----------------------------|-----------------------------|
| R01_cb15252_c6/flp0/1728     | NA                               | R01_cb15252_c6/flp0/1728     | NA                          | NA                          |
| R01_cb5659_c42/flp0/3218     | NA                               | NA                           | NA                          | R01_cb5659_c42/flp0/3218    |
| R01_cb2170_c0/flp0/4029      | NA                               | NA                           | NA                          | R01_cb2170_c0/flp0/4029     |
| R01_cb573_c16/flp0/2689      | NA                               | R01_cb573_c16/flp0/2689      | NA                          | R01_cb573_c16/flp0/2689     |
| R01_cb15844_c1/flp0/741      | R01_cb15844_c1/flp0/741          | R01_cb15844_c1/flp0/741      | R01_cb15844_c1/flp0/741     | R01_cb15844_c1/flp0/741     |
| R01_cb6628_c2/flp0/2578      | NA                               | R01_cb6628_c2/flp0/2578      | NA                          | NA                          |
| R01_cb8975_c3/flp0/2222      | NA                               | NA                           | NA                          | R01_cb8975_c3/flp0/2222     |
| R01_cb18107_c1/flp0/1204     | NA                               | NA                           | NA                          | R01_cb18107_c1/flp0/1204    |
| R01_cb4529_c6/flp2/4180      | NA                               | R01_cb4529_c6/flp2/4180      | NA                          | NA                          |
| R01_cb14004_c15/flp1/1445    | NA                               | NA                           | NA                          | R01_cb14004_c15/flp1/1445   |
| R01_cb15864_c0/flp0/1348     | NA                               | R01_cb15864_c0/flp0/1348     | R01_cb15864_c0/flp0/1348    | R01_cb15864_c0/flp0/1348    |
| R01_cb6802_c74/flp0/2372     | NA                               | R01_cb6802_c74/flp0/2372     | NA                          | NA                          |
| R01_cb15222_c6/flp0/691      | R01_cb15222_c6/flp0/691          | R01_cb15222_c6/flp0/691      | NA                          | R01_cb15222_c6/flp0/691     |
| R01_cb7836_c4/flp0/1915      | NA                               | R01_cb7836_c4/flp0/1915      | NA                          | R01_cb7836_c4/flp0/1915     |
| R01_cb8564_c91271/flp0/3105  | NA                               | R01_cb8564_c91271/flp0/3105  | NA                          | R01_cb8564_c91271/flp0/3105 |
| R01_cb4352_c7/flp0/2277      | NA                               | NA                           | NA                          | R01_cb4352_c7/flp0/2277     |
| R01_cb17333_c3/flp0/1654     | NA                               | R01_cb17333_c3/flp0/1654     | NA                          | R01_cb17333_c3/flp0/1654    |
| R01_cb11506_c0/flp0/687      | R01_cb11506_c0/flp0/687          | R01_cb11506_c0/flp0/687      | R01_cb11506_c0/flp0/687     | R01_cb11506_c0/flp0/687     |
| R01_cb8564_c53400/flp2/3991  | R01_cb8564_c53400/flp2/3991<br>1 | R01_cb8564_c53400/flp2/3991  | R01_cb8564_c53400/flp2/3991 | R01_cb8564_c53400/flp2/3991 |
| R01_cb3492_c1/flp0/3348      | NA                               | R01_cb3492_c1/flp0/3348      | NA                          | NA                          |
| R01_cb8564_c126630/flp0/2236 | NA                               | R01_cb8564_c126630/flp0/2236 | NA                          | NA                          |
| R01_cb14620_c5/flp0/1877     | NA                               | NA                           | R01_cb14620_c5/flp0/1877    | NA                          |
| R01_cb141_c2/flp0/4942       | NA                               | NA                           | NA                          | R01_cb141_c2/flp0/4942      |
| R01_cb8327_c0/flp0/2370      | NA                               | NA                           | NA                          | R01_cb8327_c0/flp0/2370     |

|                             |                             |                             |                            |                             |
|-----------------------------|-----------------------------|-----------------------------|----------------------------|-----------------------------|
| R01_cb2170_c5/flp0/6505     | NA                          | NA                          | NA                         | R01_cb2170_c5/flp0/6505     |
| R01_cb13228_c4/flp0/883     | NA                          | R01_cb13228_c4/flp0/883     | R01_cb13228_c4/flp0/883    | R01_cb13228_c4/flp0/883     |
| R01_cb18035_c6/flp0/351     | R01_cb18035_c6/flp0/351     | R01_cb18035_c6/flp0/351     | R01_cb18035_c6/flp0/351    | R01_cb18035_c6/flp0/351     |
| R01_cb8564_c74642/flp0/2006 | NA                          | R01_cb8564_c74642/flp0/2006 | NA                         | R01_cb8564_c74642/flp0/2006 |
| R01_cb8564_c3688/flp0/2353  | NA                          | R01_cb8564_c3688/flp0/2353  | R01_cb8564_c3688/flp0/2353 | R01_cb8564_c3688/flp0/2353  |
| R01_cb3757_c4/flp0/2679     | NA                          | NA                          | NA                         | R01_cb3757_c4/flp0/2679     |
| R01_cb13578_c3/flp0/1078    | NA                          | R01_cb13578_c3/flp0/1078    | NA                         | NA                          |
| R01_cb453_c10/flp1/2563     | NA                          | R01_cb453_c10/flp1/2563     | NA                         | NA                          |
| R01_cb5635_c3/flp0/2927     | NA                          | NA                          | NA                         | R01_cb5635_c3/flp0/2927     |
| R01_cb10029_c255/flp0/777   | NA                          | R01_cb10029_c255/flp0/777   | NA                         | NA                          |
| R01_cb15709_c5/flp0/551     | R01_cb15709_c5/flp0/551     | R01_cb15709_c5/flp0/551     | NA                         | R01_cb15709_c5/flp0/551     |
| R01_cb14353_c0/flp0/1201    | NA                          | NA                          | NA                         | R01_cb14353_c0/flp0/1201    |
| R01_cb5847_c6/flp0/2573     | NA                          | NA                          | NA                         | R01_cb5847_c6/flp0/2573     |
| R01_cb3971_c4/flp0/2436     | NA                          | R01_cb3971_c4/flp0/2436     | NA                         | NA                          |
| R01_cb8564_c3065/flp0/3414  | NA                          | R01_cb8564_c3065/flp0/3414  | NA                         | R01_cb8564_c3065/flp0/3414  |
| R01_cb11918_c15/flp0/1747   | NA                          | NA                          | NA                         | R01_cb11918_c15/flp0/1747   |
| R01_cb4147_c17/flp0/2280    | NA                          | R01_cb4147_c17/flp0/2280    | NA                         | NA                          |
| R01_cb12837_c3/flp2/709     | NA                          | R01_cb12837_c3/flp2/709     | NA                         | NA                          |
| R01_cb8564_c91819/flp0/2197 | NA                          | R01_cb8564_c91819/flp0/2197 | NA                         | NA                          |
| R01_cb15659_c2/flp0/1527    | NA                          | NA                          | NA                         | R01_cb15659_c2/flp0/1527    |
| R01_cb5412_c6/flp0/2031     | NA                          | NA                          | NA                         | R01_cb5412_c6/flp0/2031     |
| R01_cb18417_c0/flp0/604     | NA                          | R01_cb18417_c0/flp0/604     | R01_cb18417_c0/flp0/604    | R01_cb18417_c0/flp0/604     |
| R01_cb18132_c14/flp0/1820   | NA                          | R01_cb18132_c14/flp0/1820   | NA                         | NA                          |
| R01_cb8564_c25660/flp0/2099 | R01_cb8564_c25660/flp0/2099 | R01_cb8564_c25660/flp0/2099 | NA                         | R01_cb8564_c25660/flp0/2099 |
| R01_cb1894_c6/flp0/2061     | NA                          | R01_cb1894_c6/flp0/2061     | NA                         | R01_cb1894_c6/flp0/2061     |

|                              |                             |                              |                             |                             |
|------------------------------|-----------------------------|------------------------------|-----------------------------|-----------------------------|
| R01_cb8564_c123817/flp0/2095 | NA                          | R01_cb8564_c123817/flp0/2095 | NA                          | NA                          |
| R01_cb5862_c0/flp0/2994      | NA                          | R01_cb5862_c0/flp0/2994      | R01_cb5862_c0/flp0/2994     | R01_cb5862_c0/flp0/2994     |
| R01_cb12329_c3/f3p0/939      | NA                          | NA                           | NA                          | R01_cb12329_c3/f3p0/939     |
| R01_cb8564_c80343/flp0/2617  | R01_cb8564_c80343/flp0/2617 | R01_cb8564_c80343/flp0/2617  | R01_cb8564_c80343/flp0/2617 | R01_cb8564_c80343/flp0/2617 |
| R01_cb6411_c1/flp0/3261      | NA                          | NA                           | NA                          | R01_cb6411_c1/flp0/3261     |
| R01_cb10943_c3/flp0/2689     | NA                          | NA                           | NA                          | R01_cb10943_c3/flp0/2689    |
| R01_cb8564_c126890/flp0/3020 | NA                          | R01_cb8564_c126890/flp0/3020 | NA                          | NA                          |
| R01_cb15388_c11/flp0/1743    | NA                          | R01_cb15388_c11/flp0/1743    | NA                          | NA                          |
| R01_cb8564_c82746/flp0/2594  | NA                          | R01_cb8564_c82746/flp0/2594  | NA                          | NA                          |
| R01_cb4147_c22/flp0/2769     | NA                          | NA                           | NA                          | R01_cb4147_c22/flp0/2769    |
| R01_cb3556_c6/flp0/3509      | NA                          | R01_cb3556_c6/flp0/3509      | NA                          | NA                          |
| R01_cb11271_c1/flp0/565      | NA                          | R01_cb11271_c1/flp0/565      | NA                          | NA                          |
| R01_cb8564_c70550/flp0/2913  | NA                          | NA                           | R01_cb8564_c70550/flp0/2913 | R01_cb8564_c70550/flp0/2913 |
| R01_cb124_c7/f2p0/3544       | NA                          | NA                           | NA                          | R01_cb124_c7/f2p0/3544      |
| R01_cb9320_c1/flp0/2028      | NA                          | R01_cb9320_c1/flp0/2028      | R01_cb9320_c1/flp0/2028     | NA                          |
| R01_cb13561_c1/flp0/1209     | NA                          | R01_cb13561_c1/flp0/1209     | NA                          | NA                          |
| R01_cb8564_c49341/flp0/2817  | NA                          | R01_cb8564_c49341/flp0/2817  | NA                          | NA                          |
| R01_cb8564_c80228/flp0/3046  | NA                          | R01_cb8564_c80228/flp0/3046  | NA                          | NA                          |
| R01_cb15326_c8/flp0/1693     | R01_cb15326_c8/flp0/1693    | R01_cb15326_c8/flp0/1693     | R01_cb15326_c8/flp0/1693    | R01_cb15326_c8/flp0/1693    |
| R01_cb16422_c5/flp0/1868     | NA                          | R01_cb16422_c5/flp0/1868     | R01_cb16422_c5/flp0/1868    | R01_cb16422_c5/flp0/1868    |
| R01_cb8198_c3/flp1/1936      | NA                          | NA                           | NA                          | R01_cb8198_c3/flp1/1936     |
| R01_cb1594_c14/f5p0/2426     | NA                          | NA                           | NA                          | R01_cb1594_c14/f5p0/2426    |
| R01_cb11563_c0/flp0/1260     | NA                          | NA                           | NA                          | R01_cb11563_c0/flp0/1260    |

|                              |                         |                             |                              |                              |
|------------------------------|-------------------------|-----------------------------|------------------------------|------------------------------|
| R01_cb17775_c1/f1p0/706      | NA                      | R01_cb17775_c1/f1p0/706     | R01_cb17775_c1/f1p0/706      | R01_cb17775_c1/f1p0/706      |
| R01_cb10810_c2/f2p1/796      | NA                      | NA                          | NA                           | R01_cb10810_c2/f2p1/796      |
| R01_cb8564_c127007/f1p0/2166 | NA                      | NA                          | R01_cb8564_c127007/f1p0/2166 | R01_cb8564_c127007/f1p0/2166 |
| R01_cb10724_c2/f1p0/1098     | NA                      | NA                          | NA                           | R01_cb10724_c2/f1p0/1098     |
| R01_cb11318_c2/f1p0/616      | NA                      | NA                          | NA                           | R01_cb11318_c2/f1p0/616      |
| R01_cb7563_c31/f1p0/655      | NA                      | R01_cb7563_c31/f1p0/655     | NA                           | NA                           |
| R01_cb1228_c5/f5p0/2625      | NA                      | NA                          | NA                           | R01_cb1228_c5/f5p0/2625      |
| R01_cb2843_c17/f12p4/2666    | NA                      | NA                          | NA                           | R01_cb2843_c17/f12p4/2666    |
| R01_cb10820_c1/f1p0/4353     | NA                      | R01_cb10820_c1/f1p0/4353    | NA                           | R01_cb10820_c1/f1p0/4353     |
| R01_cb1905_c32/f1p0/2036     | NA                      | NA                          | R01_cb1905_c32/f1p0/2036     | NA                           |
| R01_cb5724_c6/f1p0/2264      | NA                      | R01_cb5724_c6/f1p0/2264     | NA                           | NA                           |
| R01_cb3320_c12/f1p0/1908     | NA                      | R01_cb3320_c12/f1p0/1908    | R01_cb3320_c12/f1p0/1908     | R01_cb3320_c12/f1p0/1908     |
| R01_cb2907_c1/f1p0/3762      | NA                      | NA                          | NA                           | R01_cb2907_c1/f1p0/3762      |
| R01_cb13478_c15/f7p1/531     | NA                      | R01_cb13478_c15/f7p1/531    | R01_cb13478_c15/f7p1/531     | R01_cb13478_c15/f7p1/531     |
| R01_cb9272_c6/f1p0/748       | NA                      | NA                          | R01_cb9272_c6/f1p0/748       | R01_cb9272_c6/f1p0/748       |
| R01_cb6553_c0/f3p0/1174      | NA                      | NA                          | NA                           | R01_cb6553_c0/f3p0/1174      |
| R01_cb8417_c5/f2p0/2381      | NA                      | NA                          | NA                           | R01_cb8417_c5/f2p0/2381      |
| R01_cb15581_c0/f4p0/910      | NA                      | NA                          | NA                           | R01_cb15581_c0/f4p0/910      |
| R01_cb10979_c5/f1p0/506      | R01_cb10979_c5/f1p0/506 | R01_cb10979_c5/f1p0/506     | NA                           | NA                           |
| R01_cb14982_c0/f2p0/612      | NA                      | NA                          | R01_cb14982_c0/f2p0/612      | R01_cb14982_c0/f2p0/612      |
| R01_cb16217_c0/f1p0/1013     | NA                      | NA                          | NA                           | R01_cb16217_c0/f1p0/1013     |
| R01_cb1095_c8/f1p0/2141      | NA                      | NA                          | NA                           | R01_cb1095_c8/f1p0/2141      |
| R01_cb5429_c2/f1p0/752       | NA                      | R01_cb5429_c2/f1p0/752      | R01_cb5429_c2/f1p0/752       | R01_cb5429_c2/f1p0/752       |
| R01_cb17216_c1/f1p0/538      | NA                      | R01_cb17216_c1/f1p0/538     | R01_cb17216_c1/f1p0/538      | R01_cb17216_c1/f1p0/538      |
| R01_cb8564_c44681/f1p0/2675  | NA                      | R01_cb8564_c44681/f1p0/2675 | R01_cb8564_c44681/f1p0/2675  | R01_cb8564_c44681/f1p0/2675  |

|                              |                              |                              |                              |                              |
|------------------------------|------------------------------|------------------------------|------------------------------|------------------------------|
| R01_cb17790_c0/f1p0/571      | NA                           | R01_cb17790_c0/f1p0/571      | NA                           | NA                           |
| R01_cb3388_c6/f1p0/2642      | NA                           | NA                           | NA                           | R01_cb3388_c6/f1p0/2642      |
| R01_cb8564_c9710/f2p15/4287  | NA                           | R01_cb8564_c9710/f2p15/4287  | R01_cb8564_c9710/f2p15/4287  | R01_cb8564_c9710/f2p15/4287  |
| R01_cb15879_c1/f2p0/1091     | NA                           | R01_cb15879_c1/f2p0/1091     | NA                           | NA                           |
| R01_cb17855_c0/f2p1/796      | NA                           | R01_cb17855_c0/f2p1/796      | NA                           | R01_cb17855_c0/f2p1/796      |
| R01_cb9797_c60/f1p0/2904     | NA                           | NA                           | NA                           | R01_cb9797_c60/f1p0/2904     |
| R01_cb8564_c13734/f1p0/3266  | NA                           | R01_cb8564_c13734/f1p0/3266  | NA                           | NA                           |
| R01_cb6574_c1/f1p0/2496      | NA                           | R01_cb6574_c1/f1p0/2496      | R01_cb6574_c1/f1p0/2496      | R01_cb6574_c1/f1p0/2496      |
| R01_cb6655_c2/f1p0/1676      | NA                           | R01_cb6655_c2/f1p0/1676      | R01_cb6655_c2/f1p0/1676      | NA                           |
| R01_cb18456_c7463/f1p0/1807  | NA                           | R01_cb18456_c7463/f1p0/1807  | R01_cb18456_c7463/f1p0/1807  | R01_cb18456_c7463/f1p0/1807  |
| R01_cb13914_c12/f36p1/729    | NA                           | NA                           | NA                           | R01_cb13914_c12/f36p1/729    |
| R01_cb8564_c70142/f1p0/2485  | R01_cb8564_c70142/f1p0/2485  | R01_cb8564_c70142/f1p0/2485  | R01_cb8564_c70142/f1p0/2485  | R01_cb8564_c70142/f1p0/2485  |
| R01_cb1993_c4/f1p1/3171      | NA                           | NA                           | NA                           | R01_cb1993_c4/f1p1/3171      |
| R01_cb15096_c0/f1p0/1393     | NA                           | NA                           | NA                           | R01_cb15096_c0/f1p0/1393     |
| R01_cb10138_c9/f28p4/982     | NA                           | NA                           | NA                           | R01_cb10138_c9/f28p4/982     |
| R01_cb15427_c1/f1p0/1149     | NA                           | R01_cb15427_c1/f1p0/1149     | NA                           | NA                           |
| R01_cb1964_c8/f1p0/764       | NA                           | R01_cb1964_c8/f1p0/764       | NA                           | R01_cb1964_c8/f1p0/764       |
| R01_cb8564_c126971/f1p0/2316 | R01_cb8564_c126971/f1p0/2316 | R01_cb8564_c126971/f1p0/2316 | R01_cb8564_c126971/f1p0/2316 | R01_cb8564_c126971/f1p0/2316 |
| R01_cb5471_c21/f2p0/2530     | NA                           | NA                           | NA                           | R01_cb5471_c21/f2p0/2530     |
| R01_cb2357_c11/f1p0/5825     | NA                           | NA                           | NA                           | R01_cb2357_c11/f1p0/5825     |
| R01_cb10970_c9/f1p0/1293     | NA                           | NA                           | NA                           | R01_cb10970_c9/f1p0/1293     |
| R01_cb9154_c11/f1p0/1346     | NA                           | NA                           | NA                           | R01_cb9154_c11/f1p0/1346     |
| R01_cb8564_c47737/f7p5/4351  | NA                           | NA                           | NA                           | R01_cb8564_c47737/f7p5/4351  |
| R01_cb16664_c6/f8p0/544      | NA                           | NA                           | NA                           | R01_cb16664_c6/f8p0/544      |



|                             |                         |                             |                             |                             |
|-----------------------------|-------------------------|-----------------------------|-----------------------------|-----------------------------|
| R01_cb8564_c82906/flp1/2331 | NA                      | NA                          | NA                          | R01_cb8564_c82906/flp1/2331 |
| R01_cb8564_c81378/flp0/3909 | NA                      | NA                          | NA                          | R01_cb8564_c81378/flp0/3909 |
| R01_cb8564_c78770/flp0/3662 | NA                      | NA                          | NA                          | R01_cb8564_c78770/flp0/3662 |
| R01_cb8564_c34173/f4p0/2374 | NA                      | R01_cb8564_c34173/f4p0/2374 | NA                          | NA                          |
| R01_cb4953_c5/flp1/1763     | NA                      | NA                          | NA                          | R01_cb4953_c5/flp1/1763     |
| R01_cb8564_c86163/flp1/3120 | NA                      | NA                          | R01_cb8564_c86163/flp1/3120 | R01_cb8564_c86163/flp1/3120 |
| R01_cb10837_c8/fl3p1/653    | NA                      | R01_cb10837_c8/fl3p1/653    | NA                          | R01_cb10837_c8/fl3p1/653    |
| R01_cb1228_c11/flp0/2648    | NA                      | NA                          | NA                          | R01_cb1228_c11/flp0/2648    |
| R01_cb10226_c4/flp0/1358    | NA                      | NA                          | R01_cb10226_c4/flp0/1358    | R01_cb10226_c4/flp0/1358    |
| R01_cb8564_c20497/flp0/3369 | NA                      | R01_cb8564_c20497/flp0/3369 | NA                          | NA                          |
| R01_cb8564_c75238/flp0/1942 | NA                      | R01_cb8564_c75238/flp0/1942 | R01_cb8564_c75238/flp0/1942 | NA                          |
| R01_cb2378_c19/flp2/3428    | NA                      | NA                          | NA                          | R01_cb2378_c19/flp2/3428    |
| R01_cb8564_c19698/flp2/3079 | NA                      | NA                          | NA                          | R01_cb8564_c19698/flp2/3079 |
| R01_cb16311_c2/flp0/784     | NA                      | NA                          | NA                          | R01_cb16311_c2/flp0/784     |
| R01_cb9682_c6/flp1/1955     | NA                      | NA                          | NA                          | R01_cb9682_c6/flp1/1955     |
| R01_cb11148_c2/flp0/542     | NA                      | R01_cb11148_c2/flp0/542     | NA                          | R01_cb11148_c2/flp0/542     |
| R01_cb15107_c0/flp1/891     | NA                      | R01_cb15107_c0/flp1/891     | NA                          | NA                          |
| R01_cb11303_c6/flp0/477     | NA                      | R01_cb11303_c6/flp0/477     | NA                          | NA                          |
| R01_cb8376_c5/flp0/2409     | R01_cb8376_c5/flp0/2409 | R01_cb8376_c5/flp0/2409     | R01_cb8376_c5/flp0/2409     | R01_cb8376_c5/flp0/2409     |
| R01_cb7472_c0/flp0/2617     | NA                      | R01_cb7472_c0/flp0/2617     | NA                          | R01_cb7472_c0/flp0/2617     |
| R01_cb2494_c6/flp0/2872     | NA                      | R01_cb2494_c6/flp0/2872     | NA                          | NA                          |
| R01_cb8564_c17508/flp0/4193 | NA                      | NA                          | R01_cb8564_c17508/flp0/4193 | NA                          |
| R01_cb5847_c11/flp0/2217    | NA                      | NA                          | NA                          | R01_cb5847_c11/flp0/2217    |
| R01_cb2352_c8/flp0/2989     | NA                      | NA                          | R01_cb2352_c8/flp0/2989     | R01_cb2352_c8/flp0/2989     |
| R01_cb15290_c0/flp0/526     | R01_cb15290_c0/flp0/526 | R01_cb15290_c0/flp0/526     | R01_cb15290_c0/flp0/526     | R01_cb15290_c0/flp0/526     |
| R01_cb17451_c2/flp0/846     | NA                      | NA                          | NA                          | R01_cb17451_c2/flp0/846     |

|                              |                           |                             |                           |                              |
|------------------------------|---------------------------|-----------------------------|---------------------------|------------------------------|
| R01_cb18132_c15/flp0/1348    | NA                        | R01_cb18132_c15/flp0/1348   | NA                        | NA                           |
| R01_cb11295_c0/flp0/637      | R01_cb11295_c0/flp0/637   | NA                          | R01_cb11295_c0/flp0/637   | R01_cb11295_c0/flp0/637      |
| R01_cb3582_c9/flp0/2457      | NA                        | NA                          | NA                        | R01_cb3582_c9/flp0/2457      |
| R01_cb18199_c2/flp0/400      | R01_cb18199_c2/flp0/400   | R01_cb18199_c2/flp0/400     | R01_cb18199_c2/flp0/400   | R01_cb18199_c2/flp0/400      |
| R01_cb8564_c24016/flp1/3082  | NA                        | NA                          | NA                        | R01_cb8564_c24016/flp1/3082  |
| R01_cb11905_c15/flp0/857     | NA                        | R01_cb11905_c15/flp0/857    | NA                        | NA                           |
| R01_cb18132_c24/flp0/589     | NA                        | R01_cb18132_c24/flp0/589    | R01_cb18132_c24/flp0/589  | R01_cb18132_c24/flp0/589     |
| R01_cb14169_c1/flp0/1149     | NA                        | R01_cb14169_c1/flp0/1149    | NA                        | NA                           |
| R01_cb13783_c4/flp0/338      | R01_cb13783_c4/flp0/338   | R01_cb13783_c4/flp0/338     | R01_cb13783_c4/flp0/338   | R01_cb13783_c4/flp0/338      |
| R01_cb10648_c9/flp0/1176     | NA                        | R01_cb10648_c9/flp0/1176    | NA                        | NA                           |
| R01_cb11072_c4/flp0/2463     | R01_cb11072_c4/flp0/2463  | R01_cb11072_c4/flp0/2463    | NA                        | NA                           |
| R01_cb12579_c13/flp1/1099    | R01_cb12579_c13/flp1/1099 | R01_cb12579_c13/flp1/1099   | R01_cb12579_c13/flp1/1099 | R01_cb12579_c13/flp1/1099    |
| R01_cb8564_c89247/flp0/3102  | NA                        | R01_cb8564_c89247/flp0/3102 | NA                        | R01_cb8564_c89247/flp0/3102  |
| R01_cb873_c9/f4p0/2933       | NA                        | NA                          | NA                        | R01_cb873_c9/f4p0/2933       |
| R01_cb9373_c1/f2p0/2064      | NA                        | R01_cb9373_c1/f2p0/2064     | NA                        | NA                           |
| R01_cb13778_c2/flp0/1426     | NA                        | R01_cb13778_c2/flp0/1426    | NA                        | NA                           |
| R01_cb5950_c6/flp0/2341      | NA                        | NA                          | NA                        | R01_cb5950_c6/flp0/2341      |
| R01_cb8564_c124605/flp0/2372 | NA                        | NA                          | NA                        | R01_cb8564_c124605/flp0/2372 |
| R01_cb2277_c30/flp0/346      | R01_cb2277_c30/flp0/346   | R01_cb2277_c30/flp0/346     | R01_cb2277_c30/flp0/346   | R01_cb2277_c30/flp0/346      |
| R01_cb10921_c6/flp0/1495     | NA                        | NA                          | NA                        | R01_cb10921_c6/flp0/1495     |
| R01_cb11274_c2/flp0/2546     | NA                        | R01_cb11274_c2/flp0/2546    | NA                        | NA                           |
| R01_cb13914_c4/flp0/677      | NA                        | R01_cb13914_c4/flp0/677     | NA                        | R01_cb13914_c4/flp0/677      |
| R01_cb135_c16/flp0/4235      | NA                        | R01_cb135_c16/flp0/4235     | NA                        | NA                           |
| R01_cb8564_c81714/f3p1/2660  | NA                        | NA                          | NA                        | R01_cb8564_c81714/f3p1/2660  |
| R01_cb13776_c6/flp0/724      | NA                        | R01_cb13776_c6/flp0/724     | NA                        | R01_cb13776_c6/flp0/724      |

|                             |                             |                             |                             |                             |
|-----------------------------|-----------------------------|-----------------------------|-----------------------------|-----------------------------|
| R01_cb10203_c0/f1p0/726     | R01_cb10203_c0/f1p0/726     | NA                          | NA                          | R01_cb10203_c0/f1p0/726     |
| R01_cb9459_c12/f10p0/1844   | NA                          | NA                          | NA                          | R01_cb9459_c12/f10p0/1844   |
| R01_cb5132_c3/f1p0/3552     | NA                          | R01_cb5132_c3/f1p0/3552     | NA                          | NA                          |
| R01_cb10359_c1/f1p0/1450    | NA                          | NA                          | NA                          | R01_cb10359_c1/f1p0/1450    |
| R01_cb14915_c1/f3p1/1477    | NA                          | NA                          | NA                          | R01_cb14915_c1/f3p1/1477    |
| R01_cb7096_c8/f2p1/2560     | NA                          | NA                          | NA                          | R01_cb7096_c8/f2p1/2560     |
| R01_cb9993_c2/f1p0/2237     | R01_cb9993_c2/f1p0/2237     | R01_cb9993_c2/f1p0/2237     | NA                          | R01_cb9993_c2/f1p0/2237     |
| R01_cb9864_c0/f1p0/1948     | NA                          | R01_cb9864_c0/f1p0/1948     | NA                          | NA                          |
| R01_cb8564_c18927/f1p0/3935 | NA                          | R01_cb8564_c18927/f1p0/3935 | NA                          | NA                          |
| R01_cb9423_c3/f1p0/1436     | NA                          | R01_cb9423_c3/f1p0/1436     | NA                          | R01_cb9423_c3/f1p0/1436     |
| R01_cb2445_c22/f1p0/3331    | NA                          | NA                          | NA                          | R01_cb2445_c22/f1p0/3331    |
| R01_cb17886_c0/f1p0/1458    | NA                          | NA                          | NA                          | R01_cb17886_c0/f1p0/1458    |
| R01_cb4489_c17/f1p0/670     | NA                          | R01_cb4489_c17/f1p0/670     | NA                          | NA                          |
| R01_cb1698_c7/f1p0/3196     | NA                          | NA                          | NA                          | R01_cb1698_c7/f1p0/3196     |
| R01_cb2125_c10/f2p0/1566    | R01_cb2125_c10/f2p0/1566    | R01_cb2125_c10/f2p0/1566    | R01_cb2125_c10/f2p0/1566    | R01_cb2125_c10/f2p0/1566    |
| R01_cb13582_c4/f1p0/1391    | NA                          | R01_cb13582_c4/f1p0/1391    | NA                          | NA                          |
| R01_cb18456_c1879/f1p0/754  | NA                          | R01_cb18456_c1879/f1p0/754  | R01_cb18456_c1879/f1p0/754  | R01_cb18456_c1879/f1p0/754  |
| R01_cb17950_c1/f1p0/977     | NA                          | R01_cb17950_c1/f1p0/977     | R01_cb17950_c1/f1p0/977     | NA                          |
| R01_cb17220_c0/f2p0/1200    | NA                          | R01_cb17220_c0/f2p0/1200    | NA                          | NA                          |
| R01_cb8564_c80086/f1p0/3379 | NA                          | NA                          | R01_cb8564_c80086/f1p0/3379 | R01_cb8564_c80086/f1p0/3379 |
| R01_cb10764_c6/f1p0/742     | R01_cb10764_c6/f1p0/742     | R01_cb10764_c6/f1p0/742     | NA                          | NA                          |
| R01_cb8564_c70273/f1p0/2002 | NA                          | R01_cb8564_c70273/f1p0/2002 | R01_cb8564_c70273/f1p0/2002 | R01_cb8564_c70273/f1p0/2002 |
| R01_cb3575_c15/f1p0/2164    | NA                          | NA                          | NA                          | R01_cb3575_c15/f1p0/2164    |
| R01_cb8564_c38316/f1p0/4521 | R01_cb8564_c38316/f1p0/4521 | R01_cb8564_c38316/f1p0/4521 | R01_cb8564_c38316/f1p0/4521 | R01_cb8564_c38316/f1p0/4521 |
| R01_cb17973_c32/f1p0/554    | NA                          | R01_cb17973_c32/f1p0/554    | R01_cb17973_c32/f1p0/554    | NA                          |

|                             |                         |                             |                            |                             |
|-----------------------------|-------------------------|-----------------------------|----------------------------|-----------------------------|
| R01_cb1706_c5/flp0/2389     | NA                      | NA                          | NA                         | R01_cb1706_c5/flp0/2389     |
| R01_cb14883_c4/flp0/1220    | NA                      | R01_cb14883_c4/flp0/1220    | NA                         | R01_cb14883_c4/flp0/1220    |
| R01_cb6456_c7/flp0/975      | NA                      | NA                          | NA                         | R01_cb6456_c7/flp0/975      |
| R01_cb658_c2/f2p0/2863      | NA                      | NA                          | NA                         | R01_cb658_c2/f2p0/2863      |
| R01_cb17817_c1/flp0/414     | R01_cb17817_c1/flp0/414 | R01_cb17817_c1/flp0/414     | NA                         | R01_cb17817_c1/flp0/414     |
| R01_cb17589_c5/flp0/343     | NA                      | R01_cb17589_c5/flp0/343     | R01_cb17589_c5/flp0/343    | R01_cb17589_c5/flp0/343     |
| R01_cb13513_c4/flp2/701     | NA                      | R01_cb13513_c4/flp2/701     | NA                         | NA                          |
| R01_cb11049_c1/flp0/2139    | NA                      | NA                          | NA                         | R01_cb11049_c1/flp0/2139    |
| R01_cb3017_c0/flp0/3746     | NA                      | R01_cb3017_c0/flp0/3746     | NA                         | NA                          |
| R01_cb3138_c5/flp0/3627     | NA                      | R01_cb3138_c5/flp0/3627     | NA                         | R01_cb3138_c5/flp0/3627     |
| R01_cb8564_c91585/flp0/3131 | NA                      | R01_cb8564_c91585/flp0/3131 | NA                         | NA                          |
| R01_cb8564_c4616/flp1/3023  | NA                      | R01_cb8564_c4616/flp1/3023  | R01_cb8564_c4616/flp1/3023 | R01_cb8564_c4616/flp1/3023  |
| R01_cb5950_c20/flp0/1817    | NA                      | NA                          | NA                         | R01_cb5950_c20/flp0/1817    |
| R01_cb9352_c3/flp0/2124     | NA                      | NA                          | NA                         | R01_cb9352_c3/flp0/2124     |
| R01_cb506_c15/flp0/2848     | NA                      | NA                          | NA                         | R01_cb506_c15/flp0/2848     |
| R01_cb12045_c0/flp0/1607    | NA                      | NA                          | NA                         | R01_cb12045_c0/flp0/1607    |
| R01_cb15533_c17/flp0/743    | NA                      | NA                          | NA                         | R01_cb15533_c17/flp0/743    |
| R01_cb6802_c37/flp0/3820    | NA                      | R01_cb6802_c37/flp0/3820    | R01_cb6802_c37/flp0/3820   | R01_cb6802_c37/flp0/3820    |
| R01_cb18103_c6/flp0/1356    | NA                      | R01_cb18103_c6/flp0/1356    | NA                         | NA                          |
| R01_cb8564_c15997/flp0/4783 | NA                      | R01_cb8564_c15997/flp0/4783 | NA                         | NA                          |
| R01_cb8564_c3666/flp0/2796  | NA                      | NA                          | NA                         | R01_cb8564_c3666/flp0/2796  |
| R01_cb4229_c5/flp0/2565     | NA                      | NA                          | NA                         | R01_cb4229_c5/flp0/2565     |
| R01_cb18470_c0/flp0/723     | NA                      | R01_cb18470_c0/flp0/723     | NA                         | R01_cb18470_c0/flp0/723     |
| R01_cb3763_c27/flp0/2368    | NA                      | NA                          | NA                         | R01_cb3763_c27/flp0/2368    |
| R01_cb8564_c70656/flp0/1915 | NA                      | R01_cb8564_c70656/flp0/1915 | NA                         | R01_cb8564_c70656/flp0/1915 |
| R01_cb13304_c1/flp0/1119    | NA                      | NA                          | NA                         | R01_cb13304_c1/flp0/1119    |

|                              |                          |                             |                             |                              |
|------------------------------|--------------------------|-----------------------------|-----------------------------|------------------------------|
| R01_cb1228_c35/f1p0/3000     | NA                       | NA                          | NA                          | R01_cb1228_c35/f1p0/3000     |
| R01_cb4243_c0/f2p0/2997      | NA                       | R01_cb4243_c0/f2p0/2997     | R01_cb4243_c0/f2p0/2997     | NA                           |
| R01_cb7766_c4/f1p0/2455      | NA                       | R01_cb7766_c4/f1p0/2455     | NA                          | NA                           |
| R01_cb6779_c6/f1p0/1810      | NA                       | NA                          | NA                          | R01_cb6779_c6/f1p0/1810      |
| R01_cb3613_c1/f1p0/3196      | R01_cb3613_c1/f1p0/3196  | R01_cb3613_c1/f1p0/3196     | NA                          | R01_cb3613_c1/f1p0/3196      |
| R01_cb1767_c37/f1p0/1947     | NA                       | R01_cb1767_c37/f1p0/1947    | R01_cb1767_c37/f1p0/1947    | NA                           |
| R01_cb6204_c10/f1p1/2537     | NA                       | NA                          | NA                          | R01_cb6204_c10/f1p1/2537     |
| R01_cb15929_c0/f1p0/933      | NA                       | R01_cb15929_c0/f1p0/933     | R01_cb15929_c0/f1p0/933     | R01_cb15929_c0/f1p0/933      |
| R01_cb8564_c109666/f1p0/1989 | NA                       | NA                          | NA                          | R01_cb8564_c109666/f1p0/1989 |
| R01_cb12945_c2/f1p0/1406     | NA                       | NA                          | NA                          | R01_cb12945_c2/f1p0/1406     |
| R01_cb6008_c1/f1p0/3191      | NA                       | NA                          | NA                          | R01_cb6008_c1/f1p0/3191      |
| R01_cb10043_c9/f1p1/1230     | NA                       | R01_cb10043_c9/f1p1/1230    | NA                          | NA                           |
| R01_cb8564_c88385/f1p0/2356  | NA                       | R01_cb8564_c88385/f1p0/2356 | NA                          | R01_cb8564_c88385/f1p0/2356  |
| R01_cb16043_c0/f2p0/841      | R01_cb16043_c0/f2p0/841  | R01_cb16043_c0/f2p0/841     | R01_cb16043_c0/f2p0/841     | NA                           |
| R01_cb7819_c0/f2p0/1374      | NA                       | NA                          | NA                          | R01_cb7819_c0/f2p0/1374      |
| R01_cb535_c1/f1p0/4438       | NA                       | NA                          | NA                          | R01_cb535_c1/f1p0/4438       |
| R01_cb14292_c17/f1p0/446     | R01_cb14292_c17/f1p0/446 | NA                          | NA                          | NA                           |
| R01_cb7214_c1/f1p0/2667      | NA                       | NA                          | NA                          | R01_cb7214_c1/f1p0/2667      |
| R01_cb8501_c34/f1p0/544      | R01_cb8501_c34/f1p0/544  | R01_cb8501_c34/f1p0/544     | R01_cb8501_c34/f1p0/544     | R01_cb8501_c34/f1p0/544      |
| R01_cb4094_c12/f1p0/3199     | R01_cb4094_c12/f1p0/3199 | R01_cb4094_c12/f1p0/3199    | NA                          | NA                           |
| R01_cb7458_c4/f1p0/409       | R01_cb7458_c4/f1p0/409   | R01_cb7458_c4/f1p0/409      | R01_cb7458_c4/f1p0/409      | R01_cb7458_c4/f1p0/409       |
| R01_cb7962_c12/f1p0/1652     | NA                       | NA                          | NA                          | R01_cb7962_c12/f1p0/1652     |
| R01_cb8564_c17975/f1p0/3360  | NA                       | R01_cb8564_c17975/f1p0/3360 | R01_cb8564_c17975/f1p0/3360 | R01_cb8564_c17975/f1p0/3360  |
| R01_cb8123_c3/f1p0/2320      | NA                       | R01_cb8123_c3/f1p0/2320     | NA                          | NA                           |
| R01_cb9364_c1/f1p0/2425      | NA                       | NA                          | NA                          | R01_cb9364_c1/f1p0/2425      |

|                              |                             |                              |                             |                             |
|------------------------------|-----------------------------|------------------------------|-----------------------------|-----------------------------|
| R01_cb9513_c33/flp0/2509     | NA                          | R01_cb9513_c33/flp0/2509     | NA                          | NA                          |
| R01_cb10520_c8/flp1/1678     | NA                          | NA                           | NA                          | R01_cb10520_c8/flp1/1678    |
| R01_cb8564_c86127/flp0/2979  | NA                          | R01_cb8564_c86127/flp0/2979  | NA                          | NA                          |
| R01_cb8564_c76659/flp0/1894  | NA                          | R01_cb8564_c76659/flp0/1894  | R01_cb8564_c76659/flp0/1894 | NA                          |
| R01_cb11795_c1/flp0/2869     | NA                          | R01_cb11795_c1/flp0/2869     | NA                          | NA                          |
| R01_cb7303_c8/flp0/2578      | NA                          | NA                           | NA                          | R01_cb7303_c8/flp0/2578     |
| R01_cb12883_c7/flp2/949      | NA                          | R01_cb12883_c7/flp2/949      | NA                          | NA                          |
| R01_cb8428_c7/flp0/497       | R01_cb8428_c7/flp0/497      | R01_cb8428_c7/flp0/497       | R01_cb8428_c7/flp0/497      | R01_cb8428_c7/flp0/497      |
| R01_cb8564_c72997/flp0/2150  | R01_cb8564_c72997/flp0/2150 | R01_cb8564_c72997/flp0/2150  | R01_cb8564_c72997/flp0/2150 | R01_cb8564_c72997/flp0/2150 |
| R01_cb8564_c125231/flp0/2379 | NA                          | R01_cb8564_c125231/flp0/2379 | NA                          | NA                          |
| R01_cb8564_c72734/flp0/3132  | NA                          | R01_cb8564_c72734/flp0/3132  | NA                          | NA                          |
| R01_cb16452_c2/flp0/917      | R01_cb16452_c2/flp0/917     | R01_cb16452_c2/flp0/917      | R01_cb16452_c2/flp0/917     | R01_cb16452_c2/flp0/917     |
| R01_cb16092_c1/flp0/552      | R01_cb16092_c1/flp0/552     | R01_cb16092_c1/flp0/552      | R01_cb16092_c1/flp0/552     | R01_cb16092_c1/flp0/552     |
| R01_cb6513_c3/flp0/2187      | NA                          | NA                           | NA                          | R01_cb6513_c3/flp0/2187     |
| R01_cb14353_c4/flp0/1127     | NA                          | NA                           | NA                          | R01_cb14353_c4/flp0/1127    |
| R01_cb6945_c3/flp0/1227      | R01_cb6945_c3/flp0/1227     | NA                           | NA                          | R01_cb6945_c3/flp0/1227     |
| R01_cb8564_c13723/flp4/3217  | NA                          | R01_cb8564_c13723/flp4/3217  | R01_cb8564_c13723/flp4/3217 | R01_cb8564_c13723/flp4/3217 |
| R01_cb7611_c12/flp0/2555     | NA                          | NA                           | NA                          | R01_cb7611_c12/flp0/2555    |
| R01_cb8564_c83742/flp0/2904  | NA                          | NA                           | NA                          | R01_cb8564_c83742/flp0/2904 |
| R01_cb16061_c0/flp0/416      | NA                          | R01_cb16061_c0/flp0/416      | NA                          | NA                          |
| R01_cb15605_c5/f2p0/635      | R01_cb15605_c5/f2p0/635     | NA                           | R01_cb15605_c5/f2p0/635     | R01_cb15605_c5/f2p0/635     |
| R01_cb17973_c21/flp0/744     | R01_cb17973_c21/flp0/744    | R01_cb17973_c21/flp0/744     | R01_cb17973_c21/flp0/744    | R01_cb17973_c21/flp0/744    |
| R01_cb15045_c6/flp0/1489     | NA                          | NA                           | NA                          | R01_cb15045_c6/flp0/1489    |
| R01_cb17194_c0/f2p0/588      | NA                          | R01_cb17194_c0/f2p0/588      | NA                          | NA                          |

|                             |                             |                             |                             |                             |
|-----------------------------|-----------------------------|-----------------------------|-----------------------------|-----------------------------|
| R01_cb18456_c6641/f1p0/468  | R01_cb18456_c6641/f1p0/468  | R01_cb18456_c6641/f1p0/468  | R01_cb18456_c6641/f1p0/468  | R01_cb18456_c6641/f1p0/468  |
| R01_cb5635_c5/f1p0/766      | NA                          | NA                          | NA                          | R01_cb5635_c5/f1p0/766      |
| R01_cb18409_c158/f1p0/407   | R01_cb18409_c158/f1p0/407   | R01_cb18409_c158/f1p0/407   | R01_cb18409_c158/f1p0/407   | R01_cb18409_c158/f1p0/407   |
| R01_cb14897_c12/f1p0/1814   | NA                          | R01_cb14897_c12/f1p0/1814   | R01_cb14897_c12/f1p0/1814   | R01_cb14897_c12/f1p0/1814   |
| R01_cb18207_c2/f1p0/743     | R01_cb18207_c2/f1p0/743     | R01_cb18207_c2/f1p0/743     | R01_cb18207_c2/f1p0/743     | R01_cb18207_c2/f1p0/743     |
| R01_cb17639_c4/f1p0/784     | NA                          | R01_cb17639_c4/f1p0/784     | NA                          | NA                          |
| R01_cb18456_c6071/f1p0/644  | NA                          | R01_cb18456_c6071/f1p0/644  | R01_cb18456_c6071/f1p0/644  | R01_cb18456_c6071/f1p0/644  |
| R01_cb1758_c2/f1p0/3336     | NA                          | NA                          | NA                          | R01_cb1758_c2/f1p0/3336     |
| R01_cb14854_c3/f2p0/866     | NA                          | R01_cb14854_c3/f2p0/866     | NA                          | NA                          |
| R01_cb6352_c3/f1p0/2877     | NA                          | R01_cb6352_c3/f1p0/2877     | NA                          | NA                          |
| R01_cb12701_c2/f2p0/941     | R01_cb12701_c2/f2p0/941     | R01_cb12701_c2/f2p0/941     | NA                          | NA                          |
| R01_cb9201_c2/f1p0/3381     | NA                          | NA                          | NA                          | R01_cb9201_c2/f1p0/3381     |
| R01_cb981_c5/f2p0/2058      | R01_cb981_c5/f2p0/2058      | R01_cb981_c5/f2p0/2058      | R01_cb981_c5/f2p0/2058      | R01_cb981_c5/f2p0/2058      |
| R01_cb7368_c2/f1p0/1989     | R01_cb7368_c2/f1p0/1989     | R01_cb7368_c2/f1p0/1989     | NA                          | R01_cb7368_c2/f1p0/1989     |
| R01_cb7836_c2/f1p0/2354     | NA                          | R01_cb7836_c2/f1p0/2354     | NA                          | R01_cb7836_c2/f1p0/2354     |
| R01_cb8564_c1256/f1p0/2155  | NA                          | R01_cb8564_c1256/f1p0/2155  | R01_cb8564_c1256/f1p0/2155  | NA                          |
| R01_cb18456_c764/f1p0/526   | R01_cb18456_c764/f1p0/526   | R01_cb18456_c764/f1p0/526   | NA                          | R01_cb18456_c764/f1p0/526   |
| R01_cb18445_c1/f1p0/845     | NA                          | R01_cb18445_c1/f1p0/845     | R01_cb18445_c1/f1p0/845     | R01_cb18445_c1/f1p0/845     |
| R01_cb15772_c0/f2p0/759     | NA                          | NA                          | R01_cb15772_c0/f2p0/759     | R01_cb15772_c0/f2p0/759     |
| R01_cb13647_c0/f6p0/665     | NA                          | R01_cb13647_c0/f6p0/665     | NA                          | R01_cb13647_c0/f6p0/665     |
| R01_cb4674_c74/f1p0/3043    | NA                          | R01_cb4674_c74/f1p0/3043    | NA                          | R01_cb4674_c74/f1p0/3043    |
| R01_cb9852_c20/f1p0/1870    | NA                          | R01_cb9852_c20/f1p0/1870    | NA                          | NA                          |
| R01_cb8564_c47779/f1p0/2789 | R01_cb8564_c47779/f1p0/2789 | R01_cb8564_c47779/f1p0/2789 | R01_cb8564_c47779/f1p0/2789 | R01_cb8564_c47779/f1p0/2789 |
| R01_cb8564_c17441/f3p0/4144 | NA                          | NA                          | NA                          | R01_cb8564_c17441/f3p0/4144 |
| R01_cb2344_c2/f1p0/932      | R01_cb2344_c2/f1p0/932      | R01_cb2344_c2/f1p0/932      | NA                          | NA                          |

|                                  |                            |                                  |                             |                                  |
|----------------------------------|----------------------------|----------------------------------|-----------------------------|----------------------------------|
| R01_cb8564_c114653/flp0/403<br>5 | NA                         | R01_cb8564_c114653/flp0/403<br>5 | NA                          | NA                               |
| R01_cb16832_c1/flp0/564          | R01_cb16832_c1/flp0/564    | NA                               | NA                          | R01_cb16832_c1/flp0/564          |
| R01_cb10944_c1/flp0/2431         | NA                         | R01_cb10944_c1/flp0/2431         | R01_cb10944_c1/flp0/2431    | R01_cb10944_c1/flp0/2431         |
| R01_cb11558_c0/flp0/746          | R01_cb11558_c0/flp0/746    | R01_cb11558_c0/flp0/746          | R01_cb11558_c0/flp0/746     | R01_cb11558_c0/flp0/746          |
| R01_cb13580_c0/f2p0/983          | NA                         | NA                               | NA                          | R01_cb13580_c0/f2p0/983          |
| R01_cb18577_c0/flp0/463          | R01_cb18577_c0/flp0/463    | R01_cb18577_c0/flp0/463          | NA                          | R01_cb18577_c0/flp0/463          |
| R01_cb124_c13/flp0/3616          | NA                         | NA                               | NA                          | R01_cb124_c13/flp0/3616          |
| R01_cb8564_c91317/flp0/2833      | NA                         | NA                               | NA                          | R01_cb8564_c91317/flp0/2833      |
| R01_cb11283_c3/flp0/464          | R01_cb11283_c3/flp0/464    | R01_cb11283_c3/flp0/464          | R01_cb11283_c3/flp0/464     | R01_cb11283_c3/flp0/464          |
| R01_cb2030_c4/flp0/544           | R01_cb2030_c4/flp0/544     | R01_cb2030_c4/flp0/544           | NA                          | R01_cb2030_c4/flp0/544           |
| R01_cb9418_c10/flp1/1829         | NA                         | NA                               | NA                          | R01_cb9418_c10/flp1/1829         |
| R01_cb11455_c3/flp0/530          | NA                         | R01_cb11455_c3/flp0/530          | NA                          | R01_cb11455_c3/flp0/530          |
| R01_cb15739_c0/f2p0/1397         | R01_cb15739_c0/f2p0/1397   | R01_cb15739_c0/f2p0/1397         | NA                          | NA                               |
| R01_cb17823_c1/flp0/1495         | NA                         | R01_cb17823_c1/flp0/1495         | NA                          | NA                               |
| R01_cb14863_c2/flp0/1105         | NA                         | R01_cb14863_c2/flp0/1105         | R01_cb14863_c2/flp0/1105    | R01_cb14863_c2/flp0/1105         |
| R01_cb15578_c5/flp0/520          | R01_cb15578_c5/flp0/520    | R01_cb15578_c5/flp0/520          | R01_cb15578_c5/flp0/520     | R01_cb15578_c5/flp0/520          |
| R01_cb242_c26/flp0/3976          | NA                         | R01_cb242_c26/flp0/3976          | NA                          | R01_cb242_c26/flp0/3976          |
| R01_cb14971_c8/flp0/399          | R01_cb14971_c8/flp0/399    | NA                               | NA                          | R01_cb14971_c8/flp0/399          |
| R01_cb18456_c7240/flp0/521       | R01_cb18456_c7240/flp0/521 | R01_cb18456_c7240/flp0/521       | R01_cb18456_c7240/flp0/521  | R01_cb18456_c7240/flp0/521       |
| R01_cb18456_c7252/f20p3/715      | NA                         | R01_cb18456_c7252/f20p3/715      | R01_cb18456_c7252/f20p3/715 | R01_cb18456_c7252/f20p3/715      |
| R01_cb8564_c115392/flp0/301<br>2 | NA                         | R01_cb8564_c115392/flp0/301<br>2 | NA                          | R01_cb8564_c115392/flp0/301<br>2 |
| R01_cb10038_c2/flp0/2659         | NA                         | R01_cb10038_c2/flp0/2659         | NA                          | R01_cb10038_c2/flp0/2659         |
| R01_cb11072_c0/f7p0/405          | R01_cb11072_c0/f7p0/405    | R01_cb11072_c0/f7p0/405          | NA                          | NA                               |
| R01_cb6737_c47/flp0/1101         | NA                         | NA                               | NA                          | R01_cb6737_c47/flp0/1101         |



|                             |                             |                             |                             |                             |
|-----------------------------|-----------------------------|-----------------------------|-----------------------------|-----------------------------|
| R01_cb15811_c17/f1p0/1051   | NA                          | R01_cb15811_c17/f1p0/1051   | R01_cb15811_c17/f1p0/1051   | R01_cb15811_c17/f1p0/1051   |
| R01_cb8564_c75531/f1p0/3115 | R01_cb8564_c75531/f1p0/3115 | R01_cb8564_c75531/f1p0/3115 | R01_cb8564_c75531/f1p0/3115 | R01_cb8564_c75531/f1p0/3115 |
| R01_cb12418_c1/f1p0/474     | R01_cb12418_c1/f1p0/474     | R01_cb12418_c1/f1p0/474     | NA                          | R01_cb12418_c1/f1p0/474     |
| R01_cb10205_c3/f1p0/402     | R01_cb10205_c3/f1p0/402     | R01_cb10205_c3/f1p0/402     | R01_cb10205_c3/f1p0/402     | R01_cb10205_c3/f1p0/402     |
| R01_cb17543_c0/f2p0/502     | NA                          | NA                          | R01_cb17543_c0/f2p0/502     | R01_cb17543_c0/f2p0/502     |
| R01_cb9729_c7/f1p0/804      | NA                          | R01_cb9729_c7/f1p0/804      | R01_cb9729_c7/f1p0/804      | NA                          |
| R01_cb8447_c9/f1p1/2420     | NA                          | NA                          | NA                          | R01_cb8447_c9/f1p1/2420     |
| R01_cb4679_c2/f1p0/3286     | NA                          | R01_cb4679_c2/f1p0/3286     | NA                          | NA                          |
| R01_cb16125_c24/f1p0/1428   | NA                          | R01_cb16125_c24/f1p0/1428   | NA                          | NA                          |
| R01_cb5144_c6/f1p0/955      | NA                          | R01_cb5144_c6/f1p0/955      | NA                          | R01_cb5144_c6/f1p0/955      |
| R01_cb8564_c73505/f1p0/2565 | R01_cb8564_c73505/f1p0/2565 | R01_cb8564_c73505/f1p0/2565 | R01_cb8564_c73505/f1p0/2565 | R01_cb8564_c73505/f1p0/2565 |
| R01_cb10549_c5/f1p0/806     | NA                          | R01_cb10549_c5/f1p0/806     | NA                          | NA                          |
| R01_cb12897_c0/f2p0/717     | R01_cb12897_c0/f2p0/717     | R01_cb12897_c0/f2p0/717     | NA                          | NA                          |
| R01_cb6170_c10/f2p0/2672    | NA                          | NA                          | NA                          | R01_cb6170_c10/f2p0/2672    |
| R01_cb1207_c14/f1p0/1998    | NA                          | NA                          | NA                          | R01_cb1207_c14/f1p0/1998    |
| R01_cb16274_c1/f1p0/649     | NA                          | R01_cb16274_c1/f1p0/649     | NA                          | NA                          |
| R01_cb8564_c1019/f1p0/2974  | NA                          | R01_cb8564_c1019/f1p0/2974  | NA                          | NA                          |
| R01_cb8564_c82912/f1p2/2538 | NA                          | R01_cb8564_c82912/f1p2/2538 | NA                          | NA                          |
| R01_cb3022_c8/f1p0/2347     | NA                          | R01_cb3022_c8/f1p0/2347     | NA                          | NA                          |
| R01_cb8564_c82687/f1p0/3370 | NA                          | R01_cb8564_c82687/f1p0/3370 | NA                          | NA                          |
| R01_cb763_c1/f1p0/4636      | NA                          | R01_cb763_c1/f1p0/4636      | R01_cb763_c1/f1p0/4636      | R01_cb763_c1/f1p0/4636      |
| R01_cb11328_c2/f1p0/2836    | NA                          | R01_cb11328_c2/f1p0/2836    | NA                          | NA                          |
| R01_cb13663_c0/f2p0/786     | NA                          | R01_cb13663_c0/f2p0/786     | NA                          | R01_cb13663_c0/f2p0/786     |
| R01_cb18456_c4751/f1p1/559  | R01_cb18456_c4751/f1p1/559  | R01_cb18456_c4751/f1p1/559  | R01_cb18456_c4751/f1p1/559  | R01_cb18456_c4751/f1p1/559  |

|                             |                            |                             |                            |                             |
|-----------------------------|----------------------------|-----------------------------|----------------------------|-----------------------------|
| R01_cb13462_c2/flp0/1771    | NA                         | NA                          | NA                         | R01_cb13462_c2/flp0/1771    |
| R01_cb8564_c82591/flp0/4158 | NA                         | R01_cb8564_c82591/flp0/4158 | NA                         | NA                          |
| R01_cb8564_c2613/flp0/3842  | NA                         | R01_cb8564_c2613/flp0/3842  | NA                         | R01_cb8564_c2613/flp0/3842  |
| R01_cb8564_c85339/flp0/2450 | NA                         | R01_cb8564_c85339/flp0/2450 | NA                         | R01_cb8564_c85339/flp0/2450 |
| R01_cb8564_c75802/flp0/4636 | NA                         | R01_cb8564_c75802/flp0/4636 | NA                         | NA                          |
| R01_cb7873_c1/flp0/2332     | NA                         | R01_cb7873_c1/flp0/2332     | NA                         | R01_cb7873_c1/flp0/2332     |
| R01_cb15883_c0/flp0/673     | R01_cb15883_c0/flp0/673    | R01_cb15883_c0/flp0/673     | NA                         | NA                          |
| R01_cb12402_c4/f3p1/595     | NA                         | NA                          | R01_cb12402_c4/f3p1/595    | R01_cb12402_c4/f3p1/595     |
| R01_cb8564_c81984/flp0/2454 | NA                         | R01_cb8564_c81984/flp0/2454 | NA                         | NA                          |
| R01_cb18136_c1/flp0/445     | NA                         | R01_cb18136_c1/flp0/445     | NA                         | NA                          |
| R01_cb16476_c4/flp0/1265    | R01_cb16476_c4/flp0/1265   | R01_cb16476_c4/flp0/1265    | R01_cb16476_c4/flp0/1265   | R01_cb16476_c4/flp0/1265    |
| R01_cb2223_c1/flp0/2395     | NA                         | NA                          | NA                         | R01_cb2223_c1/flp0/2395     |
| R01_cb2072_c5/f2p0/3034     | NA                         | NA                          | NA                         | R01_cb2072_c5/f2p0/3034     |
| R01_cb15911_c1/flp0/1420    | NA                         | R01_cb15911_c1/flp0/1420    | NA                         | R01_cb15911_c1/flp0/1420    |
| R01_cb13980_c2/flp0/1412    | NA                         | NA                          | NA                         | R01_cb13980_c2/flp0/1412    |
| R01_cb9606_c41/flp0/1956    | NA                         | NA                          | R01_cb9606_c41/flp0/1956   | R01_cb9606_c41/flp0/1956    |
| R01_cb1438_c12/flp0/3268    | NA                         | NA                          | NA                         | R01_cb1438_c12/flp0/3268    |
| R01_cb8564_c83628/flp0/3221 | NA                         | R01_cb8564_c83628/flp0/3221 | NA                         | NA                          |
| R01_cb7010_c7/f4p1/2320     | NA                         | R01_cb7010_c7/f4p1/2320     | NA                         | NA                          |
| R01_cb4809_c3/flp1/2534     | NA                         | R01_cb4809_c3/flp1/2534     | NA                         | NA                          |
| R01_cb2445_c7/f2p0/3470     | NA                         | NA                          | NA                         | R01_cb2445_c7/f2p0/3470     |
| R01_cb8564_c19874/flp0/3596 | NA                         | R01_cb8564_c19874/flp0/3596 | NA                         | NA                          |
| R01_cb18704_c0/flp0/5707    | NA                         | R01_cb18704_c0/flp0/5707    | R01_cb18704_c0/flp0/5707   | NA                          |
| R01_cb18456_c7961/flp0/519  | R01_cb18456_c7961/flp0/519 | R01_cb18456_c7961/flp0/519  | R01_cb18456_c7961/flp0/519 | R01_cb18456_c7961/flp0/519  |
| R01_cb14905_c1/flp0/630     | NA                         | NA                          | R01_cb14905_c1/flp0/630    | R01_cb14905_c1/flp0/630     |
| R01_cb8564_c37245/flp0/2951 | NA                         | R01_cb8564_c37245/flp0/2951 | NA                         | NA                          |

|                                  |                          |                                  |                                  |                                  |
|----------------------------------|--------------------------|----------------------------------|----------------------------------|----------------------------------|
| R01_cb8564_c129371/f1p0/209<br>6 | NA                       | R01_cb8564_c129371/f1p0/209<br>6 | R01_cb8564_c129371/f1p0/209<br>6 | R01_cb8564_c129371/f1p0/209<br>6 |
| R01_cb7033_c3/f1p0/2985          | NA                       | R01_cb7033_c3/f1p0/2985          | NA                               | NA                               |
| R01_cb14044_c19/f1p0/1646        | NA                       | R01_cb14044_c19/f1p0/1646        | NA                               | NA                               |
| R01_cb6719_c47/f1p0/2096         | R01_cb6719_c47/f1p0/2096 | R01_cb6719_c47/f1p0/2096         | NA                               | R01_cb6719_c47/f1p0/2096         |
| R01_cb18456_c1871/f1p0/893       | NA                       | R01_cb18456_c1871/f1p0/893       | NA                               | NA                               |
| R01_cb6885_c6/f1p0/2457          | R01_cb6885_c6/f1p0/2457  | R01_cb6885_c6/f1p0/2457          | R01_cb6885_c6/f1p0/2457          | R01_cb6885_c6/f1p0/2457          |
| R01_cb7194_c4/f1p0/3202          | NA                       | R01_cb7194_c4/f1p0/3202          | NA                               | NA                               |
| R01_cb8564_c21207/f1p0/4093      | NA                       | NA                               | NA                               | R01_cb8564_c21207/f1p0/4093      |
| R01_cb11047_c2/f1p0/5269         | NA                       | NA                               | NA                               | R01_cb11047_c2/f1p0/5269         |
| R01_cb10376_c3/f1p0/3263         | R01_cb10376_c3/f1p0/3263 | R01_cb10376_c3/f1p0/3263         | R01_cb10376_c3/f1p0/3263         | R01_cb10376_c3/f1p0/3263         |
| R01_cb723_c1/f1p0/2894           | NA                       | R01_cb723_c1/f1p0/2894           | NA                               | NA                               |
| R01_cb8564_c89776/f1p0/2655      | NA                       | R01_cb8564_c89776/f1p0/2655      | NA                               | NA                               |
| R01_cb8564_c3144/f3p2/2153       | NA                       | NA                               | NA                               | R01_cb8564_c3144/f3p2/2153       |
| R01_cb17085_c0/f1p0/1413         | NA                       | NA                               | NA                               | R01_cb17085_c0/f1p0/1413         |
| R01_cb12534_c0/f9p0/989          | NA                       | R01_cb12534_c0/f9p0/989          | R01_cb12534_c0/f9p0/989          | R01_cb12534_c0/f9p0/989          |
| R01_cb6247_c5/f1p0/1307          | NA                       | R01_cb6247_c5/f1p0/1307          | NA                               | R01_cb6247_c5/f1p0/1307          |
| R01_cb293_c7/f1p0/4528           | NA                       | NA                               | NA                               | R01_cb293_c7/f1p0/4528           |
| R01_cb9906_c2/f1p0/1839          | NA                       | R01_cb9906_c2/f1p0/1839          | R01_cb9906_c2/f1p0/1839          | R01_cb9906_c2/f1p0/1839          |
| R01_cb11642_c1/f1p0/3328         | NA                       | NA                               | R01_cb11642_c1/f1p0/3328         | R01_cb11642_c1/f1p0/3328         |
| R01_cb8564_c10402/f1p1/2617      | NA                       | R01_cb8564_c10402/f1p1/2617      | NA                               | NA                               |
| R01_cb10844_c4/f1p0/1329         | NA                       | R01_cb10844_c4/f1p0/1329         | NA                               | R01_cb10844_c4/f1p0/1329         |
| R01_cb8564_c1751/f1p0/2432       | NA                       | R01_cb8564_c1751/f1p0/2432       | NA                               | R01_cb8564_c1751/f1p0/2432       |
| R01_cb13033_c1/f4p0/1205         | NA                       | R01_cb13033_c1/f4p0/1205         | NA                               | R01_cb13033_c1/f4p0/1205         |
| R01_cb13776_c5/f1p0/343          | R01_cb13776_c5/f1p0/343  | R01_cb13776_c5/f1p0/343          | R01_cb13776_c5/f1p0/343          | R01_cb13776_c5/f1p0/343          |
| R01_cb8564_c1402/f1p0/2306       | NA                       | R01_cb8564_c1402/f1p0/2306       | R01_cb8564_c1402/f1p0/2306       | R01_cb8564_c1402/f1p0/2306       |

|                              |                            |                              |                            |                             |
|------------------------------|----------------------------|------------------------------|----------------------------|-----------------------------|
| R01_cb10673_c1/flp0/3365     | NA                         | R01_cb10673_c1/flp0/3365     | NA                         | NA                          |
| R01_cb7506_c2/flp0/2311      | NA                         | NA                           | NA                         | R01_cb7506_c2/flp0/2311     |
| R01_cb14052_c0/flp0/436      | NA                         | R01_cb14052_c0/flp0/436      | NA                         | R01_cb14052_c0/flp0/436     |
| R01_cb10323_c1/flp0/860      | NA                         | NA                           | R01_cb10323_c1/flp0/860    | R01_cb10323_c1/flp0/860     |
| R01_cb8564_c4220/f2p0/2906   | R01_cb8564_c4220/f2p0/2906 | R01_cb8564_c4220/f2p0/2906   | R01_cb8564_c4220/f2p0/2906 | R01_cb8564_c4220/f2p0/2906  |
| R01_cb17495_c4/flp0/765      | R01_cb17495_c4/flp0/765    | R01_cb17495_c4/flp0/765      | R01_cb17495_c4/flp0/765    | R01_cb17495_c4/flp0/765     |
| R01_cb16710_c0/flp0/541      | NA                         | R01_cb16710_c0/flp0/541      | R01_cb16710_c0/flp0/541    | NA                          |
| R01_cb5900_c152/flp0/2667    | NA                         | R01_cb5900_c152/flp0/2667    | NA                         | R01_cb5900_c152/flp0/2667   |
| R01_cb8564_c118788/f2p0/2730 | NA                         | R01_cb8564_c118788/f2p0/2730 | NA                         | NA                          |
| R01_cb13073_c2/flp0/582      | NA                         | R01_cb13073_c2/flp0/582      | NA                         | R01_cb13073_c2/flp0/582     |
| R01_cb7219_c10/flp4/2444     | NA                         | NA                           | NA                         | R01_cb7219_c10/flp4/2444    |
| R01_cb11744_c1/flp0/2053     | NA                         | NA                           | NA                         | R01_cb11744_c1/flp0/2053    |
| R01_cb18310_c0/flp0/1110     | NA                         | NA                           | NA                         | R01_cb18310_c0/flp0/1110    |
| R01_cb11431_c0/flp0/1200     | NA                         | NA                           | NA                         | R01_cb11431_c0/flp0/1200    |
| R01_cb11642_c0/flp0/1873     | NA                         | NA                           | NA                         | R01_cb11642_c0/flp0/1873    |
| R01_cb8564_c53263/flp0/4074  | NA                         | R01_cb8564_c53263/flp0/4074  | NA                         | R01_cb8564_c53263/flp0/4074 |
| R01_cb8564_c3147/flp0/2665   | NA                         | R01_cb8564_c3147/flp0/2665   | NA                         | R01_cb8564_c3147/flp0/2665  |
| R01_cb6017_c4/flp0/2952      | NA                         | R01_cb6017_c4/flp0/2952      | NA                         | R01_cb6017_c4/flp0/2952     |
| R01_cb1686_c1/flp0/4237      | NA                         | R01_cb1686_c1/flp0/4237      | R01_cb1686_c1/flp0/4237    | R01_cb1686_c1/flp0/4237     |
| R01_cb9464_c4/flp0/822       | NA                         | R01_cb9464_c4/flp0/822       | NA                         | R01_cb9464_c4/flp0/822      |
| R01_cb17723_c0/flp0/938      | NA                         | NA                           | R01_cb17723_c0/flp0/938    | NA                          |
| R01_cb2049_c7/flp0/417       | R01_cb2049_c7/flp0/417     | R01_cb2049_c7/flp0/417       | R01_cb2049_c7/flp0/417     | R01_cb2049_c7/flp0/417      |
| R01_cb7137_c0/flp0/2680      | NA                         | R01_cb7137_c0/flp0/2680      | R01_cb7137_c0/flp0/2680    | R01_cb7137_c0/flp0/2680     |
| R01_cb6874_c5/flp0/2567      | NA                         | NA                           | NA                         | R01_cb6874_c5/flp0/2567     |
| R01_cb13497_c8/flp1/888      | NA                         | NA                           | NA                         | R01_cb13497_c8/flp1/888     |

|                             |                             |                             |                             |                             |
|-----------------------------|-----------------------------|-----------------------------|-----------------------------|-----------------------------|
| R01_cb6893_c3/flp0/3849     | NA                          | R01_cb6893_c3/flp0/3849     | NA                          | R01_cb6893_c3/flp0/3849     |
| R01_cb16213_c0/flp0/1773    | NA                          | NA                          | NA                          | R01_cb16213_c0/flp0/1773    |
| R01_cb2884_c0/f2p0/3781     | NA                          | NA                          | NA                          | R01_cb2884_c0/f2p0/3781     |
| R01_cb8564_c3934/flp0/4228  | NA                          | R01_cb8564_c3934/flp0/4228  | R01_cb8564_c3934/flp0/4228  | NA                          |
| R01_cb8564_c19159/flp0/2904 | NA                          | NA                          | NA                          | R01_cb8564_c19159/flp0/2904 |
| R01_cb8564_c20510/flp0/2983 | R01_cb8564_c20510/flp0/2983 | R01_cb8564_c20510/flp0/2983 | NA                          | R01_cb8564_c20510/flp0/2983 |
| R01_cb3971_c2/flp0/3505     | NA                          | R01_cb3971_c2/flp0/3505     | NA                          | NA                          |
| R01_cb10457_c2/flp0/2021    | NA                          | R01_cb10457_c2/flp0/2021    | NA                          | R01_cb10457_c2/flp0/2021    |
| R01_cb10070_c3/flp0/833     | NA                          | NA                          | NA                          | R01_cb10070_c3/flp0/833     |
| R01_cb18456_c6265/flp0/814  | NA                          | NA                          | NA                          | R01_cb18456_c6265/flp0/814  |
| R01_cb4893_c18/flp0/573     | R01_cb4893_c18/flp0/573     | R01_cb4893_c18/flp0/573     | R01_cb4893_c18/flp0/573     | R01_cb4893_c18/flp0/573     |
| R01_cb11278_c2/flp0/1699    | NA                          | R01_cb11278_c2/flp0/1699    | R01_cb11278_c2/flp0/1699    | R01_cb11278_c2/flp0/1699    |
| R01_cb1849_c21/flp1/1806    | NA                          | NA                          | NA                          | R01_cb1849_c21/flp1/1806    |
| R01_cb17582_c4/flp0/710     | NA                          | R01_cb17582_c4/flp0/710     | R01_cb17582_c4/flp0/710     | R01_cb17582_c4/flp0/710     |
| R01_cb16996_c1/flp0/824     | R01_cb16996_c1/flp0/824     | R01_cb16996_c1/flp0/824     | R01_cb16996_c1/flp0/824     | R01_cb16996_c1/flp0/824     |
| R01_cb7345_c7/flp0/2464     | NA                          | R01_cb7345_c7/flp0/2464     | NA                          | NA                          |
| R01_cb8564_c77201/flp0/2102 | NA                          | R01_cb8564_c77201/flp0/2102 | R01_cb8564_c77201/flp0/2102 | R01_cb8564_c77201/flp0/2102 |
| R01_cb8037_c5/flp0/1371     | NA                          | NA                          | NA                          | R01_cb8037_c5/flp0/1371     |
| R01_cb8564_c51296/flp0/2027 | NA                          | R01_cb8564_c51296/flp0/2027 | R01_cb8564_c51296/flp0/2027 | R01_cb8564_c51296/flp0/2027 |
| R01_cb4471_c4/flp0/3540     | NA                          | NA                          | NA                          | R01_cb4471_c4/flp0/3540     |
| R01_cb17333_c2/flp0/1535    | NA                          | R01_cb17333_c2/flp0/1535    | NA                          | R01_cb17333_c2/flp0/1535    |
| R01_cb4543_c0/flp0/3310     | NA                          | R01_cb4543_c0/flp0/3310     | R01_cb4543_c0/flp0/3310     | NA                          |
| R01_cb13392_c9/f2p0/484     | NA                          | NA                          | R01_cb13392_c9/f2p0/484     | R01_cb13392_c9/f2p0/484     |
| R01_cb3483_c9/flp0/2825     | NA                          | NA                          | NA                          | R01_cb3483_c9/flp0/2825     |
| R01_cb13762_c33/flp0/1048   | NA                          | R01_cb13762_c33/flp0/1048   | R01_cb13762_c33/flp0/1048   | R01_cb13762_c33/flp0/1048   |

|                             |                         |                             |                             |                             |
|-----------------------------|-------------------------|-----------------------------|-----------------------------|-----------------------------|
| R01_cb1905_c8/flp0/2229     | NA                      | R01_cb1905_c8/flp0/2229     | R01_cb1905_c8/flp0/2229     | NA                          |
| R01_cb18817_c0/f2p0/5685    | NA                      | NA                          | NA                          | R01_cb18817_c0/f2p0/5685    |
| R01_cb13941_c4/flp0/1008    | NA                      | R01_cb13941_c4/flp0/1008    | NA                          | R01_cb13941_c4/flp0/1008    |
| R01_cb7416_c12/flp0/1304    | NA                      | NA                          | NA                          | R01_cb7416_c12/flp0/1304    |
| R01_cb8564_c3067/flp0/2488  | NA                      | R01_cb8564_c3067/flp0/2488  | NA                          | R01_cb8564_c3067/flp0/2488  |
| R01_cb3703_c5/flp1/2985     | NA                      | R01_cb3703_c5/flp1/2985     | R01_cb3703_c5/flp1/2985     | R01_cb3703_c5/flp1/2985     |
| R01_cb10691_c5/flp0/1270    | NA                      | R01_cb10691_c5/flp0/1270    | NA                          | NA                          |
| R01_cb12321_c654/flp0/537   | NA                      | R01_cb12321_c654/flp0/537   | NA                          | NA                          |
| R01_cb8660_c14/flp0/946     | R01_cb8660_c14/flp0/946 | R01_cb8660_c14/flp0/946     | NA                          | R01_cb8660_c14/flp0/946     |
| R01_cb5046_c5/flp0/1852     | NA                      | R01_cb5046_c5/flp0/1852     | NA                          | NA                          |
| R01_cb16369_c0/flp0/541     | NA                      | R01_cb16369_c0/flp0/541     | NA                          | R01_cb16369_c0/flp0/541     |
| R01_cb1488_c5/flp0/2442     | NA                      | R01_cb1488_c5/flp0/2442     | NA                          | NA                          |
| R01_cb2588_c1/flp0/3874     | NA                      | R01_cb2588_c1/flp0/3874     | R01_cb2588_c1/flp0/3874     | R01_cb2588_c1/flp0/3874     |
| R01_cb14542_c6/flp0/1272    | NA                      | NA                          | NA                          | R01_cb14542_c6/flp0/1272    |
| R01_cb842_c2/flp0/4603      | NA                      | R01_cb842_c2/flp0/4603      | NA                          | R01_cb842_c2/flp0/4603      |
| R01_cb8564_c69823/flp0/2349 | NA                      | NA                          | NA                          | R01_cb8564_c69823/flp0/2349 |
| R01_cb5811_c14/flp0/1001    | NA                      | R01_cb5811_c14/flp0/1001    | NA                          | R01_cb5811_c14/flp0/1001    |
| R01_cb15663_c0/f2p0/1628    | NA                      | NA                          | NA                          | R01_cb15663_c0/f2p0/1628    |
| R01_cb11974_c3/flp0/374     | NA                      | R01_cb11974_c3/flp0/374     | NA                          | NA                          |
| R01_cb9617_c14/flp0/1639    | NA                      | NA                          | R01_cb9617_c14/flp0/1639    | R01_cb9617_c14/flp0/1639    |
| R01_cb13135_c2/flp0/1002    | NA                      | R01_cb13135_c2/flp0/1002    | NA                          | NA                          |
| R01_cb8564_c5258/flp0/2514  | NA                      | R01_cb8564_c5258/flp0/2514  | NA                          | NA                          |
| R01_cb11376_c3/flp1/614     | NA                      | R01_cb11376_c3/flp1/614     | NA                          | R01_cb11376_c3/flp1/614     |
| R01_cb13953_c17/flp2/877    | NA                      | R01_cb13953_c17/flp2/877    | NA                          | NA                          |
| R01_cb8789_c0/f2p0/2281     | NA                      | R01_cb8789_c0/f2p0/2281     | NA                          | NA                          |
| R01_cb8564_c83855/flp0/3065 | NA                      | R01_cb8564_c83855/flp0/3065 | R01_cb8564_c83855/flp0/3065 | R01_cb8564_c83855/flp0/3065 |

|                              |                            |                             |                             |                              |
|------------------------------|----------------------------|-----------------------------|-----------------------------|------------------------------|
| R01_cb6686_c1/flp0/2801      | NA                         | R01_cb6686_c1/flp0/2801     | R01_cb6686_c1/flp0/2801     | NA                           |
| R01_cb8564_c72631/flp0/2252  | NA                         | NA                          | NA                          | R01_cb8564_c72631/flp0/2252  |
| R01_cb10190_c6/flp0/1605     | NA                         | R01_cb10190_c6/flp0/1605    | R01_cb10190_c6/flp0/1605    | R01_cb10190_c6/flp0/1605     |
| R01_cb8564_c2015/flp0/2862   | NA                         | R01_cb8564_c2015/flp0/2862  | R01_cb8564_c2015/flp0/2862  | NA                           |
| R01_cb4652_c1/flp0/3202      | NA                         | R01_cb4652_c1/flp0/3202     | NA                          | NA                           |
| R01_cb8823_c1/flp0/2258      | NA                         | R01_cb8823_c1/flp0/2258     | R01_cb8823_c1/flp0/2258     | R01_cb8823_c1/flp0/2258      |
| R01_cb8564_c74705/flp0/4795  | NA                         | R01_cb8564_c74705/flp0/4795 | NA                          | R01_cb8564_c74705/flp0/4795  |
| R01_cb2894_c6/flp0/3214      | NA                         | R01_cb2894_c6/flp0/3214     | NA                          | NA                           |
| R01_cb18409_c56/flp0/836     | R01_cb18409_c56/flp0/836   | R01_cb18409_c56/flp0/836    | R01_cb18409_c56/flp0/836    | R01_cb18409_c56/flp0/836     |
| R01_cb18456_c1616/f2p2/728   | R01_cb18456_c1616/f2p2/728 | R01_cb18456_c1616/f2p2/728  | R01_cb18456_c1616/f2p2/728  | R01_cb18456_c1616/f2p2/728   |
| R01_cb16784_c1/flp0/1525     | NA                         | NA                          | NA                          | R01_cb16784_c1/flp0/1525     |
| R01_cb7911_c1/flp0/2380      | NA                         | NA                          | NA                          | R01_cb7911_c1/flp0/2380      |
| R01_cb1096_c3/f2p0/2251      | NA                         | NA                          | NA                          | R01_cb1096_c3/f2p0/2251      |
| R01_cb3757_c5/flp0/2581      | NA                         | NA                          | NA                          | R01_cb3757_c5/flp0/2581      |
| R01_cb4625_c1/flp0/3002      | NA                         | R01_cb4625_c1/flp0/3002     | NA                          | NA                           |
| R01_cb8564_c118310/flp0/1939 | NA                         | NA                          | NA                          | R01_cb8564_c118310/flp0/1939 |
| R01_cb8564_c75756/f2p0/1973  | NA                         | R01_cb8564_c75756/f2p0/1973 | R01_cb8564_c75756/f2p0/1973 | R01_cb8564_c75756/f2p0/1973  |
| R01_cb18409_c163/flp0/428    | R01_cb18409_c163/flp0/428  | R01_cb18409_c163/flp0/428   | R01_cb18409_c163/flp0/428   | R01_cb18409_c163/flp0/428    |
| R01_cb14635_c5/flp0/692      | R01_cb14635_c5/flp0/692    | R01_cb14635_c5/flp0/692     | R01_cb14635_c5/flp0/692     | R01_cb14635_c5/flp0/692      |
| R01_cb13184_c2/flp0/499      | R01_cb13184_c2/flp0/499    | R01_cb13184_c2/flp0/499     | R01_cb13184_c2/flp0/499     | R01_cb13184_c2/flp0/499      |
| R01_cb10483_c2/flp1/1808     | NA                         | NA                          | NA                          | R01_cb10483_c2/flp1/1808     |
| R01_cb16672_c1/f2p0/705      | R01_cb16672_c1/f2p0/705    | R01_cb16672_c1/f2p0/705     | R01_cb16672_c1/f2p0/705     | NA                           |
| R01_cb5331_c3/flp0/587       | R01_cb5331_c3/flp0/587     | R01_cb5331_c3/flp0/587      | R01_cb5331_c3/flp0/587      | R01_cb5331_c3/flp0/587       |
| R01_cb48_c7/flp0/4085        | NA                         | NA                          | NA                          | R01_cb48_c7/flp0/4085        |
| R01_cb11473_c1/flp0/2543     | NA                         | NA                          | NA                          | R01_cb11473_c1/flp0/2543     |

|                              |                             |                              |                           |                              |
|------------------------------|-----------------------------|------------------------------|---------------------------|------------------------------|
| R01_cb8564_c15007/flp0/3414  | NA                          | R01_cb8564_c15007/flp0/3414  | NA                        | NA                           |
| R01_cb14164_c0/flp0/1705     | NA                          | NA                           | R01_cb14164_c0/flp0/1705  | R01_cb14164_c0/flp0/1705     |
| R01_cb1706_c11/flp0/2510     | NA                          | NA                           | NA                        | R01_cb1706_c11/flp0/2510     |
| R01_cb8564_c108686/f8p0/2394 | NA                          | NA                           | NA                        | R01_cb8564_c108686/f8p0/2394 |
| R01_cb16135_c0/flp0/615      | NA                          | NA                           | NA                        | R01_cb16135_c0/flp0/615      |
| R01_cb7443_c1/flp0/2613      | NA                          | NA                           | NA                        | R01_cb7443_c1/flp0/2613      |
| R01_cb5090_c14/flp0/523      | NA                          | R01_cb5090_c14/flp0/523      | R01_cb5090_c14/flp0/523   | R01_cb5090_c14/flp0/523      |
| R01_cb8564_c79197/f2p0/3089  | R01_cb8564_c79197/f2p0/3089 | R01_cb8564_c79197/f2p0/3089  | NA                        | NA                           |
| R01_cb9772_c5/flp0/2170      | R01_cb9772_c5/flp0/2170     | R01_cb9772_c5/flp0/2170      | R01_cb9772_c5/flp0/2170   | R01_cb9772_c5/flp0/2170      |
| R01_cb18409_c31/f2p0/833     | R01_cb18409_c31/f2p0/833    | R01_cb18409_c31/f2p0/833     | R01_cb18409_c31/f2p0/833  | R01_cb18409_c31/f2p0/833     |
| R01_cb12496_c7/flp0/1620     | NA                          | R01_cb12496_c7/flp0/1620     | NA                        | NA                           |
| R01_cb3320_c13/flp0/2406     | NA                          | R01_cb3320_c13/flp0/2406     | R01_cb3320_c13/flp0/2406  | R01_cb3320_c13/flp0/2406     |
| R01_cb8037_c1/f2p0/1508      | NA                          | NA                           | NA                        | R01_cb8037_c1/f2p0/1508      |
| R01_cb10549_c2/flp0/973      | NA                          | R01_cb10549_c2/flp0/973      | NA                        | NA                           |
| R01_cb18151_c0/flp0/800      | NA                          | NA                           | NA                        | R01_cb18151_c0/flp0/800      |
| R01_cb8564_c127591/flp0/2476 | NA                          | R01_cb8564_c127591/flp0/2476 | NA                        | NA                           |
| R01_cb16303_c3/flp0/904      | NA                          | R01_cb16303_c3/flp0/904      | R01_cb16303_c3/flp0/904   | R01_cb16303_c3/flp0/904      |
| R01_cb8564_c21611/flp1/3531  | NA                          | R01_cb8564_c21611/flp1/3531  | NA                        | NA                           |
| R01_cb1085_c8/flp1/4090      | NA                          | NA                           | NA                        | R01_cb1085_c8/flp1/4090      |
| R01_cb10594_c1/flp0/1672     | NA                          | NA                           | NA                        | R01_cb10594_c1/flp0/1672     |
| R01_cb13532_c8/f23p2/1128    | R01_cb13532_c8/f23p2/1128   | NA                           | R01_cb13532_c8/f23p2/1128 | R01_cb13532_c8/f23p2/1128    |
| R01_cb18220_c0/flp0/794      | NA                          | R01_cb18220_c0/flp0/794      | NA                        | NA                           |
| R01_cb9628_c18/flp0/776      | R01_cb9628_c18/flp0/776     | R01_cb9628_c18/flp0/776      | NA                        | NA                           |



|                             |                            |                             |                             |                             |
|-----------------------------|----------------------------|-----------------------------|-----------------------------|-----------------------------|
| R01_cb8084_c0/f7p0/1210     | NA                         | NA                          | NA                          | R01_cb8084_c0/f7p0/1210     |
| R01_cb18456_c1479/f3p0/426  | R01_cb18456_c1479/f3p0/426 | R01_cb18456_c1479/f3p0/426  | R01_cb18456_c1479/f3p0/426  | R01_cb18456_c1479/f3p0/426  |
| R01_cb5808_c2/f1p0/3006     | NA                         | NA                          | NA                          | R01_cb5808_c2/f1p0/3006     |
| R01_cb11194_c0/f2p0/1719    | NA                         | NA                          | NA                          | R01_cb11194_c0/f2p0/1719    |
| R01_cb5554_c2/f1p0/2738     | R01_cb5554_c2/f1p0/2738    | R01_cb5554_c2/f1p0/2738     | R01_cb5554_c2/f1p0/2738     | NA                          |
| R01_cb3120_c50/f1p0/3165    | R01_cb3120_c50/f1p0/3165   | R01_cb3120_c50/f1p0/3165    | NA                          | NA                          |
| R01_cb3246_c5/f1p0/568      | R01_cb3246_c5/f1p0/568     | R01_cb3246_c5/f1p0/568      | NA                          | R01_cb3246_c5/f1p0/568      |
| R01_cb11780_c0/f1p0/1100    | NA                         | NA                          | NA                          | R01_cb11780_c0/f1p0/1100    |
| R01_cb18456_c6106/f1p0/381  | R01_cb18456_c6106/f1p0/381 | NA                          | R01_cb18456_c6106/f1p0/381  | R01_cb18456_c6106/f1p0/381  |
| R01_cb3637_c5/f1p0/1392     | NA                         | R01_cb3637_c5/f1p0/1392     | NA                          | NA                          |
| R01_cb8564_c71403/f1p0/3069 | NA                         | R01_cb8564_c71403/f1p0/3069 | R01_cb8564_c71403/f1p0/3069 | R01_cb8564_c71403/f1p0/3069 |
| R01_cb14106_c2/f1p0/1040    | R01_cb14106_c2/f1p0/1040   | R01_cb14106_c2/f1p0/1040    | NA                          | NA                          |
| R01_cb2027_c6/f1p0/2718     | NA                         | R01_cb2027_c6/f1p0/2718     | R01_cb2027_c6/f1p0/2718     | R01_cb2027_c6/f1p0/2718     |
| R01_cb12399_c5/f1p0/588     | NA                         | R01_cb12399_c5/f1p0/588     | R01_cb12399_c5/f1p0/588     | NA                          |
| R01_cb13024_c0/f4p0/689     | NA                         | NA                          | NA                          | R01_cb13024_c0/f4p0/689     |
| R01_cb18471_c0/f1p0/998     | NA                         | NA                          | NA                          | R01_cb18471_c0/f1p0/998     |
| R01_cb10165_c3/f1p0/987     | NA                         | R01_cb10165_c3/f1p0/987     | R01_cb10165_c3/f1p0/987     | NA                          |
| R01_cb16141_c2/f1p0/1885    | R01_cb16141_c2/f1p0/1885   | R01_cb16141_c2/f1p0/1885    | R01_cb16141_c2/f1p0/1885    | R01_cb16141_c2/f1p0/1885    |
| R01_cb8827_c2/f2p0/2199     | NA                         | R01_cb8827_c2/f2p0/2199     | NA                          | NA                          |
| R01_cb12421_c45/f1p0/644    | R01_cb12421_c45/f1p0/644   | R01_cb12421_c45/f1p0/644    | NA                          | NA                          |
| R01_cb8564_c828/f1p0/1978   | NA                         | R01_cb8564_c828/f1p0/1978   | NA                          | NA                          |
| R01_cb5051_c1/f1p0/2919     | NA                         | R01_cb5051_c1/f1p0/2919     | R01_cb5051_c1/f1p0/2919     | R01_cb5051_c1/f1p0/2919     |
| R01_cb8564_c23476/f1p0/3764 | NA                         | NA                          | NA                          | R01_cb8564_c23476/f1p0/3764 |
| R01_cb8564_c89753/f1p0/1969 | NA                         | R01_cb8564_c89753/f1p0/1969 | NA                          | NA                          |
| R01_cb9606_c85/f1p0/1596    | NA                         | NA                          | R01_cb9606_c85/f1p0/1596    | R01_cb9606_c85/f1p0/1596    |
| R01_cb8564_c71668/f1p0/2070 | NA                         | NA                          | NA                          | R01_cb8564_c71668/f1p0/2070 |

|                              |                           |                             |                             |                              |
|------------------------------|---------------------------|-----------------------------|-----------------------------|------------------------------|
| R01_cb8564_c33846/f3p0/2319  | NA                        | R01_cb8564_c33846/f3p0/2319 | R01_cb8564_c33846/f3p0/2319 | R01_cb8564_c33846/f3p0/2319  |
| R01_cb12824_c15/f1p0/757     | NA                        | NA                          | R01_cb12824_c15/f1p0/757    | R01_cb12824_c15/f1p0/757     |
| R01_cb3431_c3/f1p0/3516      | NA                        | NA                          | NA                          | R01_cb3431_c3/f1p0/3516      |
| R01_cb17214_c1/f1p0/1158     | NA                        | NA                          | NA                          | R01_cb17214_c1/f1p0/1158     |
| R01_cb1981_c13/f1p0/2717     | NA                        | R01_cb1981_c13/f1p0/2717    | NA                          | NA                           |
| R01_cb14557_c2/f1p0/1802     | NA                        | NA                          | NA                          | R01_cb14557_c2/f1p0/1802     |
| R01_cb8564_c117000/f1p0/2259 | NA                        | NA                          | NA                          | R01_cb8564_c117000/f1p0/2259 |
| R01_cb16556_c2/f1p0/494      | NA                        | R01_cb16556_c2/f1p0/494     | NA                          | R01_cb16556_c2/f1p0/494      |
| R01_cb10375_c7/f1p0/1131     | NA                        | NA                          | NA                          | R01_cb10375_c7/f1p0/1131     |
| R01_cb11046_c2/f1p1/2451     | NA                        | R01_cb11046_c2/f1p1/2451    | R01_cb11046_c2/f1p1/2451    | R01_cb11046_c2/f1p1/2451     |
| R01_cb11447_c0/f1p0/1847     | NA                        | R01_cb11447_c0/f1p0/1847    | R01_cb11447_c0/f1p0/1847    | R01_cb11447_c0/f1p0/1847     |
| R01_cb6000_c22/f1p0/2286     | NA                        | R01_cb6000_c22/f1p0/2286    | NA                          | NA                           |
| R01_cb14409_c1/f3p0/576      | NA                        | R01_cb14409_c1/f3p0/576     | R01_cb14409_c1/f3p0/576     | R01_cb14409_c1/f3p0/576      |
| R01_cb16153_c2/f2p0/850      | NA                        | NA                          | R01_cb16153_c2/f2p0/850     | R01_cb16153_c2/f2p0/850      |
| R01_cb16019_c4/f1p0/1610     | R01_cb16019_c4/f1p0/1610  | R01_cb16019_c4/f1p0/1610    | R01_cb16019_c4/f1p0/1610    | R01_cb16019_c4/f1p0/1610     |
| R01_cb16678_c1/f1p0/1341     | NA                        | NA                          | R01_cb16678_c1/f1p0/1341    | R01_cb16678_c1/f1p0/1341     |
| R01_cb9993_c3/f1p0/2514      | NA                        | R01_cb9993_c3/f1p0/2514     | NA                          | R01_cb9993_c3/f1p0/2514      |
| R01_cb8102_c5/f1p0/2455      | NA                        | NA                          | NA                          | R01_cb8102_c5/f1p0/2455      |
| R01_cb8564_c123359/f1p1/1989 | NA                        | NA                          | NA                          | R01_cb8564_c123359/f1p1/1989 |
| R01_cb10968_c3/f1p0/639      | NA                        | R01_cb10968_c3/f1p0/639     | R01_cb10968_c3/f1p0/639     | R01_cb10968_c3/f1p0/639      |
| R01_cb5902_c4/f1p0/527       | NA                        | R01_cb5902_c4/f1p0/527      | NA                          | NA                           |
| R01_cb104_c13/f1p0/2645      | NA                        | NA                          | NA                          | R01_cb104_c13/f1p0/2645      |
| R01_cb18409_c180/f1p0/373    | R01_cb18409_c180/f1p0/373 | R01_cb18409_c180/f1p0/373   | R01_cb18409_c180/f1p0/373   | R01_cb18409_c180/f1p0/373    |
| R01_cb14946_c1/f1p0/1288     | R01_cb14946_c1/f1p0/1288  | R01_cb14946_c1/f1p0/1288    | NA                          | NA                           |

|                             |                         |                             |                             |                             |
|-----------------------------|-------------------------|-----------------------------|-----------------------------|-----------------------------|
| R01_cb14576_c4/flp0/936     | NA                      | NA                          | R01_cb14576_c4/flp0/936     | R01_cb14576_c4/flp0/936     |
| R01_cb16304_c3/flp0/1715    | NA                      | NA                          | NA                          | R01_cb16304_c3/flp0/1715    |
| R01_cb9443_c0/flp0/2114     | NA                      | R01_cb9443_c0/flp0/2114     | NA                          | NA                          |
| R01_cb9932_c2/flp0/2662     | NA                      | R01_cb9932_c2/flp0/2662     | R01_cb9932_c2/flp0/2662     | R01_cb9932_c2/flp0/2662     |
| R01_cb917_c6/flp0/4659      | NA                      | NA                          | NA                          | R01_cb917_c6/flp0/4659      |
| R01_cb12119_c5/flp0/1146    | NA                      | R01_cb12119_c5/flp0/1146    | R01_cb12119_c5/flp0/1146    | NA                          |
| R01_cb2376_c18/flp0/3642    | NA                      | NA                          | NA                          | R01_cb2376_c18/flp0/3642    |
| R01_cb17126_c1/flp0/1260    | NA                      | NA                          | NA                          | R01_cb17126_c1/flp0/1260    |
| R01_cb8564_c20190/flp2/4575 | NA                      | NA                          | NA                          | R01_cb8564_c20190/flp2/4575 |
| R01_cb4134_c28/flp1/2717    | NA                      | NA                          | NA                          | R01_cb4134_c28/flp1/2717    |
| R01_cb16723_c3/flp0/499     | R01_cb16723_c3/flp0/499 | R01_cb16723_c3/flp0/499     | R01_cb16723_c3/flp0/499     | R01_cb16723_c3/flp0/499     |
| R01_cb18456_c7148/flp0/1595 | NA                      | R01_cb18456_c7148/flp0/1595 | R01_cb18456_c7148/flp0/1595 | R01_cb18456_c7148/flp0/1595 |
| R01_cb2571_c37/flp1/3764    | NA                      | NA                          | NA                          | R01_cb2571_c37/flp1/3764    |
| R01_cb12603_c18/flp0/1827   | NA                      | NA                          | R01_cb12603_c18/flp0/1827   | R01_cb12603_c18/flp0/1827   |
| R01_cb10024_c526/flp2/754   | NA                      | R01_cb10024_c526/flp2/754   | NA                          | NA                          |
| R01_cb12432_c3/f3p1/657     | NA                      | NA                          | R01_cb12432_c3/f3p1/657     | R01_cb12432_c3/f3p1/657     |
| R01_cb8564_c116843/flp0/278 | NA                      | NA                          | R01_cb8564_c116843/flp0/278 | R01_cb8564_c116843/flp0/278 |
| 9                           | NA                      | NA                          | 9                           | 9                           |
| R01_cb7329_c6/flp0/950      | NA                      | R01_cb7329_c6/flp0/950      | NA                          | NA                          |
| R01_cb3371_c4/flp0/3647     | NA                      | R01_cb3371_c4/flp0/3647     | NA                          | NA                          |
| R01_cb17003_c0/flp0/1199    | NA                      | R01_cb17003_c0/flp0/1199    | NA                          | R01_cb17003_c0/flp0/1199    |
| R01_cb8564_c157677/flp0/214 | NA                      | R01_cb8564_c157677/flp0/214 | R01_cb8564_c157677/flp0/214 | R01_cb8564_c157677/flp0/214 |
| 2                           | NA                      | 2                           | 2                           | 2                           |
| R01_cb15428_c0/f3p0/780     | NA                      | NA                          | R01_cb15428_c0/f3p0/780     | R01_cb15428_c0/f3p0/780     |
| R01_cb1203_c21/flp0/2229    | NA                      | NA                          | NA                          | R01_cb1203_c21/flp0/2229    |
| R01_cb8564_c71513/flp0/2076 | NA                      | NA                          | NA                          | R01_cb8564_c71513/flp0/2076 |

|                             |                          |                             |                             |                             |
|-----------------------------|--------------------------|-----------------------------|-----------------------------|-----------------------------|
| R01_cb8564_c73343/f1p0/2005 | NA                       | R01_cb8564_c73343/f1p0/2005 | NA                          | NA                          |
| R01_cb952_c1/f1p0/4472      | R01_cb952_c1/f1p0/4472   | R01_cb952_c1/f1p0/4472      | R01_cb952_c1/f1p0/4472      | NA                          |
| R01_cb18456_c7455/f1p0/1446 | NA                       | R01_cb18456_c7455/f1p0/1446 | NA                          | R01_cb18456_c7455/f1p0/1446 |
| R01_cb416_c7/f4p0/3143      | NA                       | R01_cb416_c7/f4p0/3143      | NA                          | NA                          |
| R01_cb16645_c51/f1p0/997    | NA                       | R01_cb16645_c51/f1p0/997    | NA                          | NA                          |
| R01_cb15755_c2/f1p0/765     | NA                       | R01_cb15755_c2/f1p0/765     | NA                          | R01_cb15755_c2/f1p0/765     |
| R01_cb8564_c146594/f5p1/273 | NA                       | R01_cb8564_c146594/f5p1/273 | R01_cb8564_c146594/f5p1/273 | R01_cb8564_c146594/f5p1/273 |
| 9                           |                          | 9                           | 9                           | 9                           |
| R01_cb3359_c60/f1p0/490     | NA                       | R01_cb3359_c60/f1p0/490     | NA                          | NA                          |
| R01_cb1224_c19/f1p1/4162    | NA                       | NA                          | NA                          | R01_cb1224_c19/f1p1/4162    |
| R01_cb14125_c67/f1p0/559    | NA                       | R01_cb14125_c67/f1p0/559    | R01_cb14125_c67/f1p0/559    | NA                          |
| R01_cb5108_c28/f1p0/2142    | NA                       | R01_cb5108_c28/f1p0/2142    | NA                          | NA                          |
| R01_cb8564_c84445/f1p0/2154 | NA                       | R01_cb8564_c84445/f1p0/2154 | R01_cb8564_c84445/f1p0/2154 | R01_cb8564_c84445/f1p0/2154 |
| R01_cb763_c10/f1p0/860      | R01_cb763_c10/f1p0/860   | R01_cb763_c10/f1p0/860      | R01_cb763_c10/f1p0/860      | R01_cb763_c10/f1p0/860      |
| R01_cb11343_c1/f1p1/1893    | NA                       | NA                          | NA                          | R01_cb11343_c1/f1p1/1893    |
| R01_cb10024_c295/f1p0/564   | NA                       | NA                          | R01_cb10024_c295/f1p0/564   | NA                          |
| R01_cb8564_c82297/f1p0/3607 | NA                       | NA                          | NA                          | R01_cb8564_c82297/f1p0/3607 |
| R01_cb8564_c81595/f1p0/2803 | NA                       | R01_cb8564_c81595/f1p0/2803 | NA                          | NA                          |
| R01_cb7946_c2/f1p0/2121     | NA                       | R01_cb7946_c2/f1p0/2121     | R01_cb7946_c2/f1p0/2121     | NA                          |
| R01_cb18575_c0/f2p0/1063    | R01_cb18575_c0/f2p0/1063 | R01_cb18575_c0/f2p0/1063    | R01_cb18575_c0/f2p0/1063    | R01_cb18575_c0/f2p0/1063    |
| R01_cb14863_c1/f1p1/941     | NA                       | R01_cb14863_c1/f1p1/941     | R01_cb14863_c1/f1p1/941     | R01_cb14863_c1/f1p1/941     |
| R01_cb12972_c29/f1p0/1456   | NA                       | R01_cb12972_c29/f1p0/1456   | NA                          | R01_cb12972_c29/f1p0/1456   |
| R01_cb8564_c127806/f1p0/248 | NA                       | R01_cb8564_c127806/f1p0/248 | NA                          | R01_cb8564_c127806/f1p0/248 |
| 4                           |                          | 4                           |                             | 4                           |
| R01_cb3826_c11/f1p0/1554    | R01_cb3826_c11/f1p0/1554 | R01_cb3826_c11/f1p0/1554    | NA                          | R01_cb3826_c11/f1p0/1554    |
| R01_cb8564_c51485/f1p0/4405 | NA                       | R01_cb8564_c51485/f1p0/4405 | NA                          | NA                          |

|                             |                            |                            |                            |                             |
|-----------------------------|----------------------------|----------------------------|----------------------------|-----------------------------|
| R01_cb15990_c1/f2p0/1153    | NA                         | NA                         | NA                         | R01_cb15990_c1/f2p0/1153    |
| R01_cb10347_c7/f1p0/966     | NA                         | R01_cb10347_c7/f1p0/966    | NA                         | NA                          |
| R01_cb8564_c68180/f8p0/3575 | NA                         | NA                         | NA                         | R01_cb8564_c68180/f8p0/3575 |
| R01_cb13083_c1/f1p0/503     | R01_cb13083_c1/f1p0/503    | NA                         | R01_cb13083_c1/f1p0/503    | R01_cb13083_c1/f1p0/503     |
| R01_cb17731_c2/f1p0/612     | NA                         | R01_cb17731_c2/f1p0/612    | NA                         | NA                          |
| R01_cb13910_c22/f1p1/1851   | NA                         | R01_cb13910_c22/f1p1/1851  | R01_cb13910_c22/f1p1/1851  | R01_cb13910_c22/f1p1/1851   |
| R01_cb1263_c1/f1p0/4218     | NA                         | R01_cb1263_c1/f1p0/4218    | NA                         | NA                          |
| R01_cb6884_c10/f1p0/2549    | NA                         | R01_cb6884_c10/f1p0/2549   | NA                         | NA                          |
| R01_cb7890_c1/f1p0/2072     | R01_cb7890_c1/f1p0/2072    | R01_cb7890_c1/f1p0/2072    | R01_cb7890_c1/f1p0/2072    | R01_cb7890_c1/f1p0/2072     |
| R01_cb4233_c205/f1p0/3584   | R01_cb4233_c205/f1p0/3584  | R01_cb4233_c205/f1p0/3584  | R01_cb4233_c205/f1p0/3584  | NA                          |
| R01_cb7497_c5/f1p1/3232     | NA                         | NA                         | NA                         | R01_cb7497_c5/f1p1/3232     |
| R01_cb8564_c76648/f1p0/2870 | NA                         | NA                         | NA                         | R01_cb8564_c76648/f1p0/2870 |
| R01_cb10088_c30/f1p0/1003   | NA                         | R01_cb10088_c30/f1p0/1003  | NA                         | NA                          |
| R01_cb737_c57/f1p0/1427     | NA                         | R01_cb737_c57/f1p0/1427    | NA                         | NA                          |
| R01_cb13761_c15/f1p0/1137   | R01_cb13761_c15/f1p0/1137  | R01_cb13761_c15/f1p0/1137  | R01_cb13761_c15/f1p0/1137  | R01_cb13761_c15/f1p0/1137   |
| R01_cb18481_c0/f1p0/374     | R01_cb18481_c0/f1p0/374    | R01_cb18481_c0/f1p0/374    | NA                         | R01_cb18481_c0/f1p0/374     |
| R01_cb9410_c2/f2p1/2008     | NA                         | NA                         | NA                         | R01_cb9410_c2/f2p1/2008     |
| R01_cb8710_c8/f1p0/3734     | NA                         | R01_cb8710_c8/f1p0/3734    | NA                         | NA                          |
| R01_cb2843_c6/f1p4/2841     | NA                         | NA                         | NA                         | R01_cb2843_c6/f1p4/2841     |
| R01_cb8564_c1825/f1p0/4282  | NA                         | R01_cb8564_c1825/f1p0/4282 | R01_cb8564_c1825/f1p0/4282 | NA                          |
| R01_cb13169_c0/f1p0/547     | R01_cb13169_c0/f1p0/547    | R01_cb13169_c0/f1p0/547    | R01_cb13169_c0/f1p0/547    | R01_cb13169_c0/f1p0/547     |
| R01_cb8564_c1972/f1p0/2732  | R01_cb8564_c1972/f1p0/2732 | R01_cb8564_c1972/f1p0/2732 | NA                         | NA                          |
| R01_cb18324_c1/f1p0/1717    | NA                         | R01_cb18324_c1/f1p0/1717   | NA                         | NA                          |
| R01_cb18845_c0/f2p0/5160    | NA                         | R01_cb18845_c0/f2p0/5160   | NA                         | NA                          |
| R01_cb17533_c1/f1p0/702     | NA                         | NA                         | R01_cb17533_c1/f1p0/702    | R01_cb17533_c1/f1p0/702     |
| R01_cb14125_c58/f1p0/921    | R01_cb14125_c58/f1p0/921   | R01_cb14125_c58/f1p0/921   | R01_cb14125_c58/f1p0/921   | NA                          |

|                             |                           |                             |                           |                             |
|-----------------------------|---------------------------|-----------------------------|---------------------------|-----------------------------|
| R01_cb8564_c16927/flp0/4700 | NA                        | R01_cb8564_c16927/flp0/4700 | NA                        | R01_cb8564_c16927/flp0/4700 |
| R01_cb18132_c6/flp0/1723    | NA                        | R01_cb18132_c6/flp0/1723    | NA                        | NA                          |
| R01_cb8564_c117091/flp0/249 | NA                        | R01_cb8564_c117091/flp0/249 | NA                        | NA                          |
| 3                           |                           | 3                           |                           |                             |
| R01_cb6615_c20/flp0/1263    | NA                        | NA                          | NA                        | R01_cb6615_c20/flp0/1263    |
| R01_cb2765_c5/flp0/3605     | NA                        | NA                          | NA                        | R01_cb2765_c5/flp0/3605     |
| R01_cb8564_c122549/flp0/254 | NA                        | R01_cb8564_c122549/flp0/254 | NA                        | NA                          |
| 1                           |                           | 1                           |                           |                             |
| R01_cb4094_c29/flp0/407     | R01_cb4094_c29/flp0/407   | R01_cb4094_c29/flp0/407     | R01_cb4094_c29/flp0/407   | R01_cb4094_c29/flp0/407     |
| R01_cb10192_c3/f3p0/1329    | NA                        | NA                          | NA                        | R01_cb10192_c3/f3p0/1329    |
| R01_cb18386_c6/flp0/1008    | NA                        | NA                          | NA                        | R01_cb18386_c6/flp0/1008    |
| R01_cb15418_c3/flp0/1155    | NA                        | NA                          | NA                        | R01_cb15418_c3/flp0/1155    |
| R01_cb17973_c51/flp0/1205   | NA                        | NA                          | R01_cb17973_c51/flp0/1205 | NA                          |
| R01_cb12955_c14/flp0/777    | NA                        | R01_cb12955_c14/flp0/777    | NA                        | NA                          |
| R01_cb3081_c35/flp0/1192    | NA                        | NA                          | NA                        | R01_cb3081_c35/flp0/1192    |
| R01_cb17648_c1/flp0/815     | NA                        | R01_cb17648_c1/flp0/815     | NA                        | R01_cb17648_c1/flp0/815     |
| R01_cb4477_c0/flp0/3331     | NA                        | NA                          | NA                        | R01_cb4477_c0/flp0/3331     |
| R01_cb11226_c1/flp0/2696    | NA                        | R01_cb11226_c1/flp0/2696    | NA                        | NA                          |
| R01_cb14611_c1/flp0/570     | NA                        | NA                          | NA                        | R01_cb14611_c1/flp0/570     |
| R01_cb13910_c23/flp0/1150   | R01_cb13910_c23/flp0/1150 | R01_cb13910_c23/flp0/1150   | R01_cb13910_c23/flp0/1150 | R01_cb13910_c23/flp0/1150   |
| R01_cb10281_c8/flp0/774     | R01_cb10281_c8/flp0/774   | R01_cb10281_c8/flp0/774     | R01_cb10281_c8/flp0/774   | R01_cb10281_c8/flp0/774     |
| R01_cb12577_c15/flp1/1098   | NA                        | NA                          | NA                        | R01_cb12577_c15/flp1/1098   |
| R01_cb6216_c5/flp1/2842     | NA                        | NA                          | NA                        | R01_cb6216_c5/flp1/2842     |
| R01_cb124_c45/flp0/3856     | NA                        | NA                          | NA                        | R01_cb124_c45/flp0/3856     |
| R01_cb12061_c3/flp0/909     | NA                        | NA                          | R01_cb12061_c3/flp0/909   | R01_cb12061_c3/flp0/909     |
| R01_cb8564_c19106/flp1/3385 | NA                        | NA                          | NA                        | R01_cb8564_c19106/flp1/3385 |

|                              |                            |                              |                              |                              |
|------------------------------|----------------------------|------------------------------|------------------------------|------------------------------|
| R01_cb302_c22/f1p1/3121      | NA                         | NA                           | NA                           | R01_cb302_c22/f1p1/3121      |
| R01_cb12061_c4/f1p0/868      | NA                         | NA                           | R01_cb12061_c4/f1p0/868      | R01_cb12061_c4/f1p0/868      |
| R01_cb8564_c15054/f1p0/2411  | NA                         | NA                           | NA                           | R01_cb8564_c15054/f1p0/2411  |
| R01_cb449_c9/f1p0/1986       | NA                         | NA                           | NA                           | R01_cb449_c9/f1p0/1986       |
| R01_cb12521_c3/f1p0/1002     | NA                         | NA                           | NA                           | R01_cb12521_c3/f1p0/1002     |
| R01_cb3079_c0/f10p0/1714     | NA                         | NA                           | NA                           | R01_cb3079_c0/f10p0/1714     |
| R01_cb18314_c0/f2p0/525      | R01_cb18314_c0/f2p0/525    | R01_cb18314_c0/f2p0/525      | R01_cb18314_c0/f2p0/525      | R01_cb18314_c0/f2p0/525      |
| R01_cb7828_c3/f1p0/2524      | NA                         | NA                           | NA                           | R01_cb7828_c3/f1p0/2524      |
| R01_cb3556_c4/f1p0/3583      | NA                         | R01_cb3556_c4/f1p0/3583      | NA                           | NA                           |
| R01_cb177_c0/f2p0/2287       | NA                         | NA                           | NA                           | R01_cb177_c0/f2p0/2287       |
| R01_cb4136_c0/f1p0/3416      | R01_cb4136_c0/f1p0/3416    | R01_cb4136_c0/f1p0/3416      | R01_cb4136_c0/f1p0/3416      | NA                           |
| R01_cb11576_c1/f1p0/2492     | NA                         | NA                           | R01_cb11576_c1/f1p0/2492     | NA                           |
| R01_cb8564_c111865/f1p0/3154 | NA                         | R01_cb8564_c111865/f1p0/3154 | R01_cb8564_c111865/f1p0/3154 | NA                           |
| R01_cb8564_c4518/f1p0/2908   | NA                         | NA                           | R01_cb8564_c4518/f1p0/2908   | NA                           |
| R01_cb8564_c110028/f2p0/2413 | NA                         | R01_cb8564_c110028/f2p0/2413 | R01_cb8564_c110028/f2p0/2413 | R01_cb8564_c110028/f2p0/2413 |
| R01_cb8564_c121871/f1p0/2404 | NA                         | R01_cb8564_c121871/f1p0/2404 | R01_cb8564_c121871/f1p0/2404 | NA                           |
| R01_cb8564_c71207/f1p0/4053  | NA                         | R01_cb8564_c71207/f1p0/4053  | NA                           | NA                           |
| R01_cb8564_c129510/f1p0/2174 | NA                         | R01_cb8564_c129510/f1p0/2174 | R01_cb8564_c129510/f1p0/2174 | R01_cb8564_c129510/f1p0/2174 |
| R01_cb18540_c1/f1p0/1000     | R01_cb18540_c1/f1p0/1000   | R01_cb18540_c1/f1p0/1000     | NA                           | NA                           |
| R01_cb15624_c2/f1p0/540      | NA                         | R01_cb15624_c2/f1p0/540      | R01_cb15624_c2/f1p0/540      | R01_cb15624_c2/f1p0/540      |
| R01_cb18456_c6982/f1p1/577   | R01_cb18456_c6982/f1p1/577 | R01_cb18456_c6982/f1p1/577   | R01_cb18456_c6982/f1p1/577   | R01_cb18456_c6982/f1p1/577   |
| R01_cb9704_c0/f1p0/2009      | NA                         | NA                           | NA                           | R01_cb9704_c0/f1p0/2009      |

|                              |                             |                              |                              |                              |
|------------------------------|-----------------------------|------------------------------|------------------------------|------------------------------|
| R01_cb3615_c4/flp0/3002      | NA                          | R01_cb3615_c4/flp0/3002      | NA                           | NA                           |
| R01_cb8564_c43829/flp0/4379  | NA                          | NA                           | NA                           | R01_cb8564_c43829/flp0/4379  |
| R01_cb8564_c1833/flp0/2496   | R01_cb8564_c1833/flp0/2496  | R01_cb8564_c1833/flp0/2496   | R01_cb8564_c1833/flp0/2496   | R01_cb8564_c1833/flp0/2496   |
| R01_cb3794_c2/flp0/3320      | NA                          | R01_cb3794_c2/flp0/3320      | NA                           | NA                           |
| R01_cb5502_c1/f4p1/2543      | NA                          | NA                           | NA                           | R01_cb5502_c1/f4p1/2543      |
| R01_cb8564_c13270/flp0/4132  | NA                          | R01_cb8564_c13270/flp0/4132  | R01_cb8564_c13270/flp0/4132  | NA                           |
| R01_cb5168_c5/flp0/1092      | NA                          | R01_cb5168_c5/flp0/1092      | R01_cb5168_c5/flp0/1092      | R01_cb5168_c5/flp0/1092      |
| R01_cb8564_c23172/flp0/2885  | R01_cb8564_c23172/flp0/2885 | R01_cb8564_c23172/flp0/2885  | R01_cb8564_c23172/flp0/2885  | R01_cb8564_c23172/flp0/2885  |
| R01_cb16978_c1/flp0/886      | R01_cb16978_c1/flp0/886     | NA                           | R01_cb16978_c1/flp0/886      | R01_cb16978_c1/flp0/886      |
| R01_cb8564_c34222/f2p0/2540  | R01_cb8564_c34222/f2p0/2540 | R01_cb8564_c34222/f2p0/2540  | R01_cb8564_c34222/f2p0/2540  | R01_cb8564_c34222/f2p0/2540  |
| R01_cb13894_c4/flp0/670      | R01_cb13894_c4/flp0/670     | R01_cb13894_c4/flp0/670      | NA                           | NA                           |
| R01_cb8501_c28/flp0/1957     | NA                          | R01_cb8501_c28/flp0/1957     | NA                           | NA                           |
| R01_cb5713_c11/flp0/937      | R01_cb5713_c11/flp0/937     | R01_cb5713_c11/flp0/937      | R01_cb5713_c11/flp0/937      | R01_cb5713_c11/flp0/937      |
| R01_cb8564_c120089/flp0/3325 | NA                          | R01_cb8564_c120089/flp0/3325 | R01_cb8564_c120089/flp0/3325 | NA                           |
| R01_cb3949_c4/flp0/3484      | NA                          | NA                           | NA                           | R01_cb3949_c4/flp0/3484      |
| R01_cb14284_c1/flp0/743      | NA                          | R01_cb14284_c1/flp0/743      | NA                           | NA                           |
| R01_cb15582_c2/flp0/1436     | NA                          | NA                           | NA                           | R01_cb15582_c2/flp0/1436     |
| R01_cb13544_c0/f4p1/1570     | NA                          | NA                           | NA                           | R01_cb13544_c0/f4p1/1570     |
| R01_cb8564_c119651/flp1/2856 | NA                          | NA                           | NA                           | R01_cb8564_c119651/flp1/2856 |
| R01_cb4345_c14/flp1/3316     | NA                          | NA                           | NA                           | R01_cb4345_c14/flp1/3316     |
| R01_cb12837_c15/flp3/562     | NA                          | R01_cb12837_c15/flp3/562     | NA                           | NA                           |
| R01_cb9592_c9/f2p2/1628      | NA                          | NA                           | NA                           | R01_cb9592_c9/f2p2/1628      |



|                              |                             |                             |                             |                              |
|------------------------------|-----------------------------|-----------------------------|-----------------------------|------------------------------|
| R01_cb8564_c50708/f2p0/3011  | R01_cb8564_c50708/f2p0/3011 | R01_cb8564_c50708/f2p0/3011 | R01_cb8564_c50708/f2p0/3011 | R01_cb8564_c50708/f2p0/3011  |
| R01_cb10292_c0/f4p0/1111     | NA                          | NA                          | NA                          | R01_cb10292_c0/f4p0/1111     |
| R01_cb8564_c53424/f1p0/2985  | NA                          | NA                          | R01_cb8564_c53424/f1p0/2985 | R01_cb8564_c53424/f1p0/2985  |
| R01_cb18456_c7560/f1p0/543   | NA                          | R01_cb18456_c7560/f1p0/543  | NA                          | R01_cb18456_c7560/f1p0/543   |
| R01_cb8564_c109814/f2p0/187  | R01_cb8564_c109814/f2p0/187 | R01_cb8564_c109814/f2p0/187 | NA                          | R01_cb8564_c109814/f2p0/187  |
| R01_cb10775_c1/f1p0/2754     | R01_cb10775_c1/f1p0/2754    | R01_cb10775_c1/f1p0/2754    | R01_cb10775_c1/f1p0/2754    | R01_cb10775_c1/f1p0/2754     |
| R01_cb13545_c59/f1p0/586     | R01_cb13545_c59/f1p0/586    | R01_cb13545_c59/f1p0/586    | R01_cb13545_c59/f1p0/586    | R01_cb13545_c59/f1p0/586     |
| R01_cb16439_c1/f1p0/834      | NA                          | NA                          | NA                          | R01_cb16439_c1/f1p0/834      |
| R01_cb8564_c111500/f1p0/3065 | NA                          | NA                          | NA                          | R01_cb8564_c111500/f1p0/3065 |
| R01_cb17973_c6/f2p0/918      | R01_cb17973_c6/f2p0/918     | R01_cb17973_c6/f2p0/918     | R01_cb17973_c6/f2p0/918     | R01_cb17973_c6/f2p0/918      |
| R01_cb8478_c44/f1p0/3234     | NA                          | R01_cb8478_c44/f1p0/3234    | NA                          | R01_cb8478_c44/f1p0/3234     |
| R01_cb4147_c18/f1p0/2386     | NA                          | NA                          | NA                          | R01_cb4147_c18/f1p0/2386     |
| R01_cb18087_c0/f1p0/799      | NA                          | R01_cb18087_c0/f1p0/799     | NA                          | R01_cb18087_c0/f1p0/799      |
| R01_cb13889_c18/f1p0/539     | R01_cb13889_c18/f1p0/539    | R01_cb13889_c18/f1p0/539    | NA                          | NA                           |
| R01_cb18301_c7/f1p0/1719     | R01_cb18301_c7/f1p0/1719    | R01_cb18301_c7/f1p0/1719    | R01_cb18301_c7/f1p0/1719    | R01_cb18301_c7/f1p0/1719     |
| R01_cb18756_c1/f1p0/2022     | NA                          | R01_cb18756_c1/f1p0/2022    | R01_cb18756_c1/f1p0/2022    | R01_cb18756_c1/f1p0/2022     |
| R01_cb12149_c17/f1p0/1518    | R01_cb12149_c17/f1p0/1518   | R01_cb12149_c17/f1p0/1518   | NA                          | NA                           |
| R01_cb17094_c1/f1p0/979      | R01_cb17094_c1/f1p0/979     | R01_cb17094_c1/f1p0/979     | R01_cb17094_c1/f1p0/979     | R01_cb17094_c1/f1p0/979      |
| R01_cb6839_c3/f1p0/2558      | NA                          | R01_cb6839_c3/f1p0/2558     | NA                          | NA                           |
| R01_cb12329_c20/f1p0/934     | NA                          | NA                          | NA                          | R01_cb12329_c20/f1p0/934     |
| R01_cb1998_c6/f1p0/2457      | NA                          | R01_cb1998_c6/f1p0/2457     | R01_cb1998_c6/f1p0/2457     | NA                           |
| R01_cb12842_c3/f1p0/383      | R01_cb12842_c3/f1p0/383     | R01_cb12842_c3/f1p0/383     | R01_cb12842_c3/f1p0/383     | NA                           |
| R01_cb9614_c2/f1p0/1819      | NA                          | NA                          | NA                          | R01_cb9614_c2/f1p0/1819      |

|                              |                          |                              |                             |                             |
|------------------------------|--------------------------|------------------------------|-----------------------------|-----------------------------|
| R01_cb17885_c4/flp0/970      | NA                       | R01_cb17885_c4/flp0/970      | NA                          | NA                          |
| R01_cb8564_c74038/flp0/4350  | NA                       | R01_cb8564_c74038/flp0/4350  | R01_cb8564_c74038/flp0/4350 | R01_cb8564_c74038/flp0/4350 |
| R01_cb8564_c76384/flp0/2231  | NA                       | NA                           | NA                          | R01_cb8564_c76384/flp0/2231 |
| R01_cb8564_c4718/flp0/3695   | NA                       | NA                           | NA                          | R01_cb8564_c4718/flp0/3695  |
| R01_cb6258_c17/flp0/2464     | NA                       | NA                           | R01_cb6258_c17/flp0/2464    | R01_cb6258_c17/flp0/2464    |
| R01_cb4490_c13/flp0/2545     | NA                       | NA                           | NA                          | R01_cb4490_c13/flp0/2545    |
| R01_cb12516_c3/flp0/555      | R01_cb12516_c3/flp0/555  | NA                           | NA                          | R01_cb12516_c3/flp0/555     |
| R01_cb12775_c4/flp0/1459     | NA                       | NA                           | NA                          | R01_cb12775_c4/flp0/1459    |
| R01_cb12443_c2/flp0/419      | R01_cb12443_c2/flp0/419  | R01_cb12443_c2/flp0/419      | R01_cb12443_c2/flp0/419     | R01_cb12443_c2/flp0/419     |
| R01_cb8564_c1435/flp0/1939   | NA                       | R01_cb8564_c1435/flp0/1939   | R01_cb8564_c1435/flp0/1939  | NA                          |
| R01_cb1333_c20/f2p1/4359     | NA                       | R01_cb1333_c20/f2p1/4359     | R01_cb1333_c20/f2p1/4359    | R01_cb1333_c20/f2p1/4359    |
| R01_cb14758_c1/flp0/1383     | NA                       | R01_cb14758_c1/flp0/1383     | R01_cb14758_c1/flp0/1383    | R01_cb14758_c1/flp0/1383    |
| R01_cb14624_c4/flp0/534      | R01_cb14624_c4/flp0/534  | R01_cb14624_c4/flp0/534      | R01_cb14624_c4/flp0/534     | R01_cb14624_c4/flp0/534     |
| R01_cb1706_c2/f2p0/2994      | NA                       | NA                           | NA                          | R01_cb1706_c2/f2p0/2994     |
| R01_cb8564_c73594/flp0/2698  | NA                       | NA                           | NA                          | R01_cb8564_c73594/flp0/2698 |
| R01_cb15149_c0/f3p0/424      | R01_cb15149_c0/f3p0/424  | R01_cb15149_c0/f3p0/424      | NA                          | NA                          |
| R01_cb8564_c110432/flp0/4489 | NA                       | R01_cb8564_c110432/flp0/4489 | NA                          | NA                          |
| R01_cb8564_c3049/flp0/3118   | NA                       | R01_cb8564_c3049/flp0/3118   | R01_cb8564_c3049/flp0/3118  | R01_cb8564_c3049/flp0/3118  |
| R01_cb18489_c1/flp0/1306     | NA                       | R01_cb18489_c1/flp0/1306     | R01_cb18489_c1/flp0/1306    | R01_cb18489_c1/flp0/1306    |
| R01_cb7368_c1/flp0/2387      | NA                       | R01_cb7368_c1/flp0/2387      | NA                          | R01_cb7368_c1/flp0/2387     |
| R01_cb8564_c76115/flp0/2356  | NA                       | R01_cb8564_c76115/flp0/2356  | NA                          | NA                          |
| R01_cb10034_c28/flp5/2081    | NA                       | R01_cb10034_c28/flp5/2081    | NA                          | NA                          |
| R01_cb18456_c7244/flp0/1336  | NA                       | R01_cb18456_c7244/flp0/1336  | R01_cb18456_c7244/flp0/1336 | R01_cb18456_c7244/flp0/1336 |
| R01_cb8650_c4/flp1/2111      | R01_cb8650_c4/flp1/2111  | R01_cb8650_c4/flp1/2111      | R01_cb8650_c4/flp1/2111     | NA                          |
| R01_cb18764_c1/flp0/1518     | R01_cb18764_c1/flp0/1518 | R01_cb18764_c1/flp0/1518     | R01_cb18764_c1/flp0/1518    | R01_cb18764_c1/flp0/1518    |

|                              |                             |                              |                             |                              |
|------------------------------|-----------------------------|------------------------------|-----------------------------|------------------------------|
| R01_cb8564_c126035/f2p0/2239 | NA                          | R01_cb8564_c126035/f2p0/2239 | NA                          | R01_cb8564_c126035/f2p0/2239 |
| R01_cb16426_c3/flp0/678      | NA                          | R01_cb16426_c3/flp0/678      | NA                          | NA                           |
| R01_cb18456_c7977/flp0/395   | R01_cb18456_c7977/flp0/395  | R01_cb18456_c7977/flp0/395   | R01_cb18456_c7977/flp0/395  | R01_cb18456_c7977/flp0/395   |
| R01_cb6508_c13/flp0/2792     | NA                          | R01_cb6508_c13/flp0/2792     | NA                          | NA                           |
| R01_cb13726_c4/flp1/1007     | NA                          | NA                           | NA                          | R01_cb13726_c4/flp1/1007     |
| R01_cb11112_c1/flp0/3116     | NA                          | R01_cb11112_c1/flp0/3116     | NA                          | NA                           |
| R01_cb14502_c5/f2p0/1300     | NA                          | R01_cb14502_c5/f2p0/1300     | R01_cb14502_c5/f2p0/1300    | R01_cb14502_c5/f2p0/1300     |
| R01_cb10637_c1/flp0/3698     | NA                          | R01_cb10637_c1/flp0/3698     | R01_cb10637_c1/flp0/3698    | R01_cb10637_c1/flp0/3698     |
| R01_cb9418_c3/flp1/1920      | NA                          | R01_cb9418_c3/flp1/1920      | NA                          | R01_cb9418_c3/flp1/1920      |
| R01_cb8007_c0/flp0/2483      | NA                          | R01_cb8007_c0/flp0/2483      | NA                          | NA                           |
| R01_cb8564_c1754/flp0/4035   | NA                          | NA                           | NA                          | R01_cb8564_c1754/flp0/4035   |
| R01_cb13502_c1/flp0/1346     | NA                          | R01_cb13502_c1/flp0/1346     | NA                          | R01_cb13502_c1/flp0/1346     |
| R01_cb15570_c2/flp0/1661     | R01_cb15570_c2/flp0/1661    | R01_cb15570_c2/flp0/1661     | R01_cb15570_c2/flp0/1661    | R01_cb15570_c2/flp0/1661     |
| R01_cb8216_c3/flp0/2346      | NA                          | R01_cb8216_c3/flp0/2346      | NA                          | NA                           |
| R01_cb17956_c5/flp0/705      | R01_cb17956_c5/flp0/705     | R01_cb17956_c5/flp0/705      | NA                          | NA                           |
| R01_cb18427_c2/flp0/652      | NA                          | NA                           | NA                          | R01_cb18427_c2/flp0/652      |
| R01_cb17402_c2/flp0/1034     | NA                          | NA                           | NA                          | R01_cb17402_c2/flp0/1034     |
| R01_cb8564_c37949/flp0/4680  | NA                          | R01_cb8564_c37949/flp0/4680  | NA                          | NA                           |
| R01_cb13845_c1/flp0/652      | R01_cb13845_c1/flp0/652     | R01_cb13845_c1/flp0/652      | NA                          | NA                           |
| R01_cb5183_c110/flp0/1341    | NA                          | NA                           | NA                          | R01_cb5183_c110/flp0/1341    |
| R01_cb10797_c1/flp0/3720     | NA                          | R01_cb10797_c1/flp0/3720     | NA                          | R01_cb10797_c1/flp0/3720     |
| R01_cb8564_c43079/flp0/1963  | R01_cb8564_c43079/flp0/1963 | R01_cb8564_c43079/flp0/1963  | R01_cb8564_c43079/flp0/1963 | R01_cb8564_c43079/flp0/1963  |
| R01_cb3699_c13/flp0/2720     | NA                          | R01_cb3699_c13/flp0/2720     | NA                          | NA                           |
| R01_cb14753_c1/f2p0/1551     | NA                          | R01_cb14753_c1/f2p0/1551     | NA                          | NA                           |

|                             |                            |                             |                            |                             |
|-----------------------------|----------------------------|-----------------------------|----------------------------|-----------------------------|
| R01_cb9029_c3/flp0/1834     | NA                         | NA                          | NA                         | R01_cb9029_c3/flp0/1834     |
| R01_cb18456_c7423/flp0/309  | R01_cb18456_c7423/flp0/309 | R01_cb18456_c7423/flp0/309  | R01_cb18456_c7423/flp0/309 | R01_cb18456_c7423/flp0/309  |
| R01_cb5139_c9/flp0/3187     | NA                         | NA                          | NA                         | R01_cb5139_c9/flp0/3187     |
| R01_cb8126_c1/f2p0/2416     | NA                         | R01_cb8126_c1/f2p0/2416     | NA                         | NA                          |
| R01_cb4744_c2/flp0/3502     | NA                         | R01_cb4744_c2/flp0/3502     | R01_cb4744_c2/flp0/3502    | R01_cb4744_c2/flp0/3502     |
| R01_cb981_c12/flp0/3088     | NA                         | R01_cb981_c12/flp0/3088     | NA                         | NA                          |
| R01_cb2061_c9/flp1/1858     | NA                         | R01_cb2061_c9/flp1/1858     | NA                         | NA                          |
| R01_cb1418_c0/f2p0/3458     | NA                         | NA                          | NA                         | R01_cb1418_c0/f2p0/3458     |
| R01_cb16138_c4/flp0/842     | R01_cb16138_c4/flp0/842    | R01_cb16138_c4/flp0/842     | R01_cb16138_c4/flp0/842    | R01_cb16138_c4/flp0/842     |
| R01_cb8564_c4122/flp0/2429  | NA                         | R01_cb8564_c4122/flp0/2429  | NA                         | NA                          |
| R01_cb2629_c15/flp0/2175    | NA                         | R01_cb2629_c15/flp0/2175    | NA                         | NA                          |
| R01_cb8564_c80781/flp0/2804 | NA                         | R01_cb8564_c80781/flp0/2804 | NA                         | R01_cb8564_c80781/flp0/2804 |
| R01_cb10842_c2/flp0/2349    | NA                         | R01_cb10842_c2/flp0/2349    | NA                         | R01_cb10842_c2/flp0/2349    |
| R01_cb18456_c6118/flp0/763  | NA                         | NA                          | NA                         | R01_cb18456_c6118/flp0/763  |
| R01_cb11105_c3/flp0/1347    | NA                         | R01_cb11105_c3/flp0/1347    | NA                         | NA                          |
| R01_cb18409_c120/flp0/1060  | R01_cb18409_c120/flp0/1060 | R01_cb18409_c120/flp0/1060  | R01_cb18409_c120/flp0/1060 | R01_cb18409_c120/flp0/1060  |
| R01_cb2072_c20/flp0/2470    | NA                         | NA                          | NA                         | R01_cb2072_c20/flp0/2470    |
| R01_cb4678_c2/flp0/2481     | NA                         | R01_cb4678_c2/flp0/2481     | NA                         | NA                          |
| R01_cb13191_c0/f2p0/1238    | NA                         | NA                          | NA                         | R01_cb13191_c0/f2p0/1238    |
| R01_cb14109_c2/flp0/316     | R01_cb14109_c2/flp0/316    | R01_cb14109_c2/flp0/316     | R01_cb14109_c2/flp0/316    | R01_cb14109_c2/flp0/316     |
| R01_cb8939_c5/flp0/2247     | NA                         | R01_cb8939_c5/flp0/2247     | NA                         | NA                          |
| R01_cb5351_c1/flp0/2013     | NA                         | NA                          | NA                         | R01_cb5351_c1/flp0/2013     |
| R01_cb8564_c33786/f3p0/2615 | NA                         | R01_cb8564_c33786/f3p0/2615 | NA                         | NA                          |
| R01_cb12702_c2/flp0/629     | R01_cb12702_c2/flp0/629    | R01_cb12702_c2/flp0/629     | R01_cb12702_c2/flp0/629    | R01_cb12702_c2/flp0/629     |
| R01_cb17826_c0/flp0/1328    | NA                         | NA                          | NA                         | R01_cb17826_c0/flp0/1328    |
| R01_cb8564_c2035/flp0/2544  | NA                         | R01_cb8564_c2035/flp0/2544  | NA                         | NA                          |

|                              |                           |                             |                            |                              |
|------------------------------|---------------------------|-----------------------------|----------------------------|------------------------------|
| R01_cb16205_c2/f1p0/1681     | NA                        | NA                          | NA                         | R01_cb16205_c2/f1p0/1681     |
| R01_cb11524_c0/f2p1/1126     | NA                        | NA                          | NA                         | R01_cb11524_c0/f2p1/1126     |
| R01_cb17269_c3/f2p0/579      | NA                        | NA                          | R01_cb17269_c3/f2p0/579    | R01_cb17269_c3/f2p0/579      |
| R01_cb16172_c2/f1p0/1370     | NA                        | R01_cb16172_c2/f1p0/1370    | R01_cb16172_c2/f1p0/1370   | NA                           |
| R01_cb10197_c2/f1p0/879      | R01_cb10197_c2/f1p0/879   | R01_cb10197_c2/f1p0/879     | R01_cb10197_c2/f1p0/879    | R01_cb10197_c2/f1p0/879      |
| R01_cb5625_c6/f1p0/1376      | NA                        | NA                          | NA                         | R01_cb5625_c6/f1p0/1376      |
| R01_cb13287_c1/f7p0/571      | NA                        | R01_cb13287_c1/f7p0/571     | NA                         | R01_cb13287_c1/f7p0/571      |
| R01_cb12297_c0/f2p0/609      | NA                        | NA                          | NA                         | R01_cb12297_c0/f2p0/609      |
| R01_cb10117_c22/f12p0/353    | R01_cb10117_c22/f12p0/353 | R01_cb10117_c22/f12p0/353   | R01_cb10117_c22/f12p0/353  | R01_cb10117_c22/f12p0/353    |
| R01_cb17084_c2/f1p0/480      | NA                        | R01_cb17084_c2/f1p0/480     | NA                         | NA                           |
| R01_cb8669_c2/f1p0/2229      | NA                        | NA                          | R01_cb8669_c2/f1p0/2229    | R01_cb8669_c2/f1p0/2229      |
| R01_cb8564_c76526/f1p0/3221  | NA                        | R01_cb8564_c76526/f1p0/3221 | NA                         | NA                           |
| R01_cb18360_c0/f2p0/675      | NA                        | R01_cb18360_c0/f2p0/675     | R01_cb18360_c0/f2p0/675    | R01_cb18360_c0/f2p0/675      |
| R01_cb261_c47/f1p0/2204      | NA                        | R01_cb261_c47/f1p0/2204     | NA                         | NA                           |
| R01_cb7087_c4/f1p0/2209      | NA                        | NA                          | NA                         | R01_cb7087_c4/f1p0/2209      |
| R01_cb9347_c2/f1p0/2109      | NA                        | R01_cb9347_c2/f1p0/2109     | NA                         | NA                           |
| R01_cb12946_c1/f1p0/678      | R01_cb12946_c1/f1p0/678   | R01_cb12946_c1/f1p0/678     | R01_cb12946_c1/f1p0/678    | NA                           |
| R01_cb4313_c1/f2p0/2541      | NA                        | R01_cb4313_c1/f2p0/2541     | NA                         | NA                           |
| R01_cb3791_c1/f3p0/1750      | NA                        | NA                          | NA                         | R01_cb3791_c1/f3p0/1750      |
| R01_cb8564_c4708/f1p0/3069   | NA                        | R01_cb8564_c4708/f1p0/3069  | R01_cb8564_c4708/f1p0/3069 | R01_cb8564_c4708/f1p0/3069   |
| R01_cb8564_c126584/f1p0/2460 | NA                        | NA                          | NA                         | R01_cb8564_c126584/f1p0/2460 |
| R01_cb226_c7/f1p0/5055       | NA                        | NA                          | NA                         | R01_cb226_c7/f1p0/5055       |
| R01_cb14004_c22/f1p0/550     | NA                        | NA                          | NA                         | R01_cb14004_c22/f1p0/550     |
| R01_cb8564_c22636/f1p0/2704  | NA                        | R01_cb8564_c22636/f1p0/2704 | NA                         | NA                           |
| R01_cb11453_c2/f1p0/959      | NA                        | NA                          | NA                         | R01_cb11453_c2/f1p0/959      |

|                             |                                  |                             |                             |                             |
|-----------------------------|----------------------------------|-----------------------------|-----------------------------|-----------------------------|
| R01_cb8564_c68757/f3p0/3422 | R01_cb8564_c68757/f3p0/3422<br>2 | R01_cb8564_c68757/f3p0/3422 | R01_cb8564_c68757/f3p0/3422 | R01_cb8564_c68757/f3p0/3422 |
| R01_cb8564_c36635/f1p0/4030 | NA                               | NA                          | NA                          | R01_cb8564_c36635/f1p0/4030 |
| R01_cb17207_c0/f3p0/724     | NA                               | NA                          | NA                          | R01_cb17207_c0/f3p0/724     |
| R01_cb9990_c0/f1p0/1892     | NA                               | NA                          | NA                          | R01_cb9990_c0/f1p0/1892     |
| R01_cb14019_c1/f1p0/1824    | NA                               | R01_cb14019_c1/f1p0/1824    | R01_cb14019_c1/f1p0/1824    | R01_cb14019_c1/f1p0/1824    |
| R01_cb8564_c22500/f1p0/3275 | NA                               | R01_cb8564_c22500/f1p0/3275 | R01_cb8564_c22500/f1p0/3275 | NA                          |
| R01_cb18456_c6425/f1p0/502  | R01_cb18456_c6425/f1p0/502       | R01_cb18456_c6425/f1p0/502  | R01_cb18456_c6425/f1p0/502  | NA                          |
| R01_cb13101_c1/f1p0/1314    | NA                               | NA                          | NA                          | R01_cb13101_c1/f1p0/1314    |
| R01_cb1093_c2/f1p0/4429     | NA                               | NA                          | NA                          | R01_cb1093_c2/f1p0/4429     |
| R01_cb18348_c2/f1p0/1259    | NA                               | R01_cb18348_c2/f1p0/1259    | NA                          | NA                          |
| R01_cb6327_c0/f1p0/2887     | NA                               | R01_cb6327_c0/f1p0/2887     | R01_cb6327_c0/f1p0/2887     | R01_cb6327_c0/f1p0/2887     |
| R01_cb8564_c40367/f1p0/2463 | NA                               | NA                          | R01_cb8564_c40367/f1p0/2463 | R01_cb8564_c40367/f1p0/2463 |
| R01_cb13781_c10/f7p0/614    | NA                               | NA                          | NA                          | R01_cb13781_c10/f7p0/614    |
| R01_cb1682_c7/f1p2/3680     | NA                               | NA                          | NA                          | R01_cb1682_c7/f1p2/3680     |
| R01_cb6608_c9/f1p1/2617     | NA                               | NA                          | NA                          | R01_cb6608_c9/f1p1/2617     |
| R01_cb4368_c12/f1p0/675     | NA                               | NA                          | NA                          | R01_cb4368_c12/f1p0/675     |
| R01_cb10024_c500/f1p0/692   | NA                               | NA                          | R01_cb10024_c500/f1p0/692   | NA                          |
| R01_cb2763_c6/f1p0/1445     | NA                               | R01_cb2763_c6/f1p0/1445     | NA                          | NA                          |
| R01_cb17744_c8/f1p0/447     | R01_cb17744_c8/f1p0/447          | R01_cb17744_c8/f1p0/447     | NA                          | NA                          |
| R01_cb3359_c23/f1p0/3467    | NA                               | R01_cb3359_c23/f1p0/3467    | R01_cb3359_c23/f1p0/3467    | R01_cb3359_c23/f1p0/3467    |
| R01_cb8564_c78644/f1p0/2442 | R01_cb8564_c78644/f1p0/2442<br>2 | R01_cb8564_c78644/f1p0/2442 | NA                          | R01_cb8564_c78644/f1p0/2442 |
| R01_cb18301_c42/f1p0/1749   | NA                               | NA                          | NA                          | R01_cb18301_c42/f1p0/1749   |
| R01_cb10027_c9/f1p1/1643    | NA                               | NA                          | NA                          | R01_cb10027_c9/f1p1/1643    |
| R01_cb18124_c2/f1p0/1422    | NA                               | R01_cb18124_c2/f1p0/1422    | NA                          | NA                          |

|                              |                             |                             |                             |                              |
|------------------------------|-----------------------------|-----------------------------|-----------------------------|------------------------------|
| R01_cb12003_c74/flp0/1823    | NA                          | R01_cb12003_c74/flp0/1823   | NA                          | NA                           |
| R01_cb10615_c2/flp0/1333     | NA                          | R01_cb10615_c2/flp0/1333    | NA                          | NA                           |
| R01_cb119_c44/f2p0/3502      | NA                          | NA                          | NA                          | R01_cb119_c44/f2p0/3502      |
| R01_cb8564_c18784/flp0/2016  | NA                          | R01_cb8564_c18784/flp0/2016 | NA                          | NA                           |
| R01_cb16580_c2/f4p0/1145     | NA                          | NA                          | NA                          | R01_cb16580_c2/f4p0/1145     |
| R01_cb1837_c12/flp0/1586     | NA                          | R01_cb1837_c12/flp0/1586    | NA                          | R01_cb1837_c12/flp0/1586     |
| R01_cb15540_c3/flp1/1396     | NA                          | R01_cb15540_c3/flp1/1396    | NA                          | R01_cb15540_c3/flp1/1396     |
| R01_cb8180_c2/flp0/1605      | NA                          | R01_cb8180_c2/flp0/1605     | NA                          | NA                           |
| R01_cb8564_c122291/flp0/2986 | NA                          | NA                          | NA                          | R01_cb8564_c122291/flp0/2986 |
| R01_cb18456_c7266/flp0/615   | NA                          | R01_cb18456_c7266/flp0/615  | NA                          | NA                           |
| R01_cb5929_c3/flp2/2584      | NA                          | NA                          | NA                          | R01_cb5929_c3/flp2/2584      |
| R01_cb11120_c3/flp0/558      | NA                          | NA                          | R01_cb11120_c3/flp0/558     | R01_cb11120_c3/flp0/558      |
| R01_cb8564_c76035/flp0/2086  | R01_cb8564_c76035/flp0/2086 | R01_cb8564_c76035/flp0/2086 | R01_cb8564_c76035/flp0/2086 | R01_cb8564_c76035/flp0/2086  |
| R01_cb7167_c48/flp0/2824     | R01_cb7167_c48/flp0/2824    | R01_cb7167_c48/flp0/2824    | R01_cb7167_c48/flp0/2824    | R01_cb7167_c48/flp0/2824     |
| R01_cb13433_c87/flp0/1925    | NA                          | R01_cb13433_c87/flp0/1925   | NA                          | NA                           |
| R01_cb3088_c5/flp0/2366      | NA                          | R01_cb3088_c5/flp0/2366     | R01_cb3088_c5/flp0/2366     | R01_cb3088_c5/flp0/2366      |
| R01_cb10291_c2/flp0/2325     | NA                          | NA                          | NA                          | R01_cb10291_c2/flp0/2325     |
| R01_cb2037_c13/flp0/5035     | NA                          | R01_cb2037_c13/flp0/5035    | NA                          | NA                           |
| R01_cb15326_c6/flp0/1229     | R01_cb15326_c6/flp0/1229    | R01_cb15326_c6/flp0/1229    | R01_cb15326_c6/flp0/1229    | R01_cb15326_c6/flp0/1229     |
| R01_cb8564_c18631/flp0/2064  | NA                          | NA                          | NA                          | R01_cb8564_c18631/flp0/2064  |
| R01_cb5847_c7/flp0/2904      | NA                          | NA                          | NA                          | R01_cb5847_c7/flp0/2904      |
| R01_cb17102_c0/f3p0/423      | R01_cb17102_c0/f3p0/423     | R01_cb17102_c0/f3p0/423     | R01_cb17102_c0/f3p0/423     | R01_cb17102_c0/f3p0/423      |
| R01_cb438_c7/flp0/2770       | NA                          | R01_cb438_c7/flp0/2770      | NA                          | R01_cb438_c7/flp0/2770       |
| R01_cb15116_c3/flp0/1614     | NA                          | NA                          | R01_cb15116_c3/flp0/1614    | R01_cb15116_c3/flp0/1614     |

|                             |                           |                             |                             |                             |
|-----------------------------|---------------------------|-----------------------------|-----------------------------|-----------------------------|
| R01_cb10742_c5/flp0/949     | NA                        | NA                          | NA                          | R01_cb10742_c5/flp0/949     |
| R01_cb8907_c2/flp0/3003     | R01_cb8907_c2/flp0/3003   | R01_cb8907_c2/flp0/3003     | R01_cb8907_c2/flp0/3003     | R01_cb8907_c2/flp0/3003     |
| R01_cb5007_c5/flp0/3201     | NA                        | R01_cb5007_c5/flp0/3201     | NA                          | NA                          |
| R01_cb11572_c1/flp0/2221    | NA                        | NA                          | NA                          | R01_cb11572_c1/flp0/2221    |
| R01_cb16136_c0/f2p0/1338    | NA                        | NA                          | NA                          | R01_cb16136_c0/f2p0/1338    |
| R01_cb17238_c1/flp0/888     | NA                        | NA                          | R01_cb17238_c1/flp0/888     | R01_cb17238_c1/flp0/888     |
| R01_cb8564_c20155/f3p1/4475 | NA                        | R01_cb8564_c20155/f3p1/4475 | R01_cb8564_c20155/f3p1/4475 | R01_cb8564_c20155/f3p1/4475 |
| R01_cb16459_c2/flp0/1204    | NA                        | R01_cb16459_c2/flp0/1204    | NA                          | NA                          |
| R01_cb18047_c0/f2p0/1152    | NA                        | R01_cb18047_c0/f2p0/1152    | R01_cb18047_c0/f2p0/1152    | R01_cb18047_c0/f2p0/1152    |
| R01_cb8564_c3669/flp0/1927  | NA                        | R01_cb8564_c3669/flp0/1927  | NA                          | NA                          |
| R01_cb1170_c1/flp0/2088     | NA                        | R01_cb1170_c1/flp0/2088     | R01_cb1170_c1/flp0/2088     | NA                          |
| R01_cb8564_c68974/f3p1/3540 | NA                        | NA                          | NA                          | R01_cb8564_c68974/f3p1/3540 |
| R01_cb11261_c0/f3p0/700     | NA                        | R01_cb11261_c0/f3p0/700     | R01_cb11261_c0/f3p0/700     | R01_cb11261_c0/f3p0/700     |
| R01_cb7356_c6/flp0/1732     | NA                        | NA                          | NA                          | R01_cb7356_c6/flp0/1732     |
| R01_cb8564_c43449/f2p0/4408 | NA                        | R01_cb8564_c43449/f2p0/4408 | NA                          | NA                          |
| R01_cb16913_c0/flp0/566     | NA                        | R01_cb16913_c0/flp0/566     | NA                          | NA                          |
| R01_cb6671_c2/flp0/1376     | NA                        | R01_cb6671_c2/flp0/1376     | R01_cb6671_c2/flp0/1376     | R01_cb6671_c2/flp0/1376     |
| R01_cb3388_c4/flp0/2798     | NA                        | R01_cb3388_c4/flp0/2798     | NA                          | R01_cb3388_c4/flp0/2798     |
| R01_cb18541_c0/flp0/867     | R01_cb18541_c0/flp0/867   | R01_cb18541_c0/flp0/867     | NA                          | NA                          |
| R01_cb16799_c3/flp0/758     | NA                        | NA                          | NA                          | R01_cb16799_c3/flp0/758     |
| R01_cb9723_c1/flp0/1995     | NA                        | NA                          | NA                          | R01_cb9723_c1/flp0/1995     |
| R01_cb2445_c25/flp0/2518    | NA                        | R01_cb2445_c25/flp0/2518    | NA                          | R01_cb2445_c25/flp0/2518    |
| R01_cb13910_c20/flp0/1107   | R01_cb13910_c20/flp0/1107 | R01_cb13910_c20/flp0/1107   | R01_cb13910_c20/flp0/1107   | R01_cb13910_c20/flp0/1107   |
| R01_cb10594_c2/flp0/2401    | NA                        | NA                          | NA                          | R01_cb10594_c2/flp0/2401    |
| R01_cb8564_c2570/flp0/2598  | NA                        | R01_cb8564_c2570/flp0/2598  | NA                          | NA                          |
| R01_cb6170_c14/flp0/2773    | NA                        | NA                          | NA                          | R01_cb6170_c14/flp0/2773    |



|                              |                            |                             |                             |                              |
|------------------------------|----------------------------|-----------------------------|-----------------------------|------------------------------|
| R01_cb850_c20/flp0/1927      | NA                         | NA                          | NA                          | R01_cb850_c20/flp0/1927      |
| R01_cb12315_c1/flp1/1143     | NA                         | R01_cb12315_c1/flp1/1143    | NA                          | R01_cb12315_c1/flp1/1143     |
| R01_cb15460_c2/flp0/1111     | NA                         | R01_cb15460_c2/flp0/1111    | NA                          | R01_cb15460_c2/flp0/1111     |
| R01_cb1952_c9/flp0/4112      | R01_cb1952_c9/flp0/4112    | R01_cb1952_c9/flp0/4112     | NA                          | NA                           |
| R01_cb12226_c2/flp0/599      | NA                         | R01_cb12226_c2/flp0/599     | NA                          | NA                           |
| R01_cb8564_c89499/flp0/1910  | NA                         | R01_cb8564_c89499/flp0/1910 | R01_cb8564_c89499/flp0/1910 | R01_cb8564_c89499/flp0/1910  |
| R01_cb1097_c8/flp0/2417      | NA                         | R01_cb1097_c8/flp0/2417     | NA                          | R01_cb1097_c8/flp0/2417      |
| R01_cb5443_c11/flp0/2439     | NA                         | R01_cb5443_c11/flp0/2439    | NA                          | NA                           |
| R01_cb12_c49/flp0/3000       | NA                         | R01_cb12_c49/flp0/3000      | NA                          | NA                           |
| R01_cb1230_c0/f2p0/4428      | NA                         | R01_cb1230_c0/f2p0/4428     | R01_cb1230_c0/f2p0/4428     | R01_cb1230_c0/f2p0/4428      |
| R01_cb10024_c326/flp0/755    | NA                         | R01_cb10024_c326/flp0/755   | NA                          | NA                           |
| R01_cb2654_c0/flp0/3834      | NA                         | NA                          | NA                          | R01_cb2654_c0/flp0/3834      |
| R01_cb18409_c28/f2p0/418     | R01_cb18409_c28/f2p0/418   | R01_cb18409_c28/f2p0/418    | R01_cb18409_c28/f2p0/418    | R01_cb18409_c28/f2p0/418     |
| R01_cb9591_c3/flp0/1917      | NA                         | R01_cb9591_c3/flp0/1917     | NA                          | NA                           |
| R01_cb10211_c9/flp0/1107     | NA                         | NA                          | NA                          | R01_cb10211_c9/flp0/1107     |
| R01_cb13598_c2/flp0/495      | NA                         | R01_cb13598_c2/flp0/495     | NA                          | R01_cb13598_c2/flp0/495      |
| R01_cb8564_c35078/f2p0/2657  | NA                         | NA                          | NA                          | R01_cb8564_c35078/f2p0/2657  |
| R01_cb10359_c6/flp0/1432     | NA                         | NA                          | NA                          | R01_cb10359_c6/flp0/1432     |
| R01_cb12316_c5/flp0/639      | NA                         | R01_cb12316_c5/flp0/639     | NA                          | NA                           |
| R01_cb7035_c1/flp0/4129      | NA                         | R01_cb7035_c1/flp0/4129     | R01_cb7035_c1/flp0/4129     | NA                           |
| R01_cb16948_c1/flp0/1422     | NA                         | NA                          | NA                          | R01_cb16948_c1/flp0/1422     |
| R01_cb8564_c156631/flp1/3967 | NA                         | NA                          | NA                          | R01_cb8564_c156631/flp1/3967 |
| R01_cb18456_c7563/flp0/579   | R01_cb18456_c7563/flp0/579 | R01_cb18456_c7563/flp0/579  | R01_cb18456_c7563/flp0/579  | R01_cb18456_c7563/flp0/579   |
| R01_cb11046_c1/f3p1/496      | NA                         | R01_cb11046_c1/f3p1/496     | NA                          | R01_cb11046_c1/f3p1/496      |
| R01_cb8564_c83212/flp0/2606  | NA                         | R01_cb8564_c83212/flp0/2606 | NA                          | R01_cb8564_c83212/flp0/2606  |

|                                  |                            |                                  |                             |                             |
|----------------------------------|----------------------------|----------------------------------|-----------------------------|-----------------------------|
| R01_cb16806_c0/flp0/715          | NA                         | R01_cb16806_c0/flp0/715          | R01_cb16806_c0/flp0/715     | NA                          |
| R01_cb7223_c1/flp0/2500          | R01_cb7223_c1/flp0/2500    | R01_cb7223_c1/flp0/2500          | R01_cb7223_c1/flp0/2500     | R01_cb7223_c1/flp0/2500     |
| R01_cb18456_c6093/flp0/302       | R01_cb18456_c6093/flp0/302 | R01_cb18456_c6093/flp0/302       | R01_cb18456_c6093/flp0/302  | R01_cb18456_c6093/flp0/302  |
| R01_cb10778_c0/flp0/798          | NA                         | R01_cb10778_c0/flp0/798          | NA                          | NA                          |
| R01_cb13289_c11/flp2/1730        | NA                         | R01_cb13289_c11/flp2/1730        | R01_cb13289_c11/flp2/1730   | NA                          |
| R01_cb6959_c3/flp0/2664          | NA                         | NA                               | NA                          | R01_cb6959_c3/flp0/2664     |
| R01_cb14399_c0/flp0/695          | NA                         | R01_cb14399_c0/flp0/695          | NA                          | R01_cb14399_c0/flp0/695     |
| R01_cb8564_c122271/flp0/217<br>1 | NA                         | R01_cb8564_c122271/flp0/217<br>1 | NA                          | NA                          |
| R01_cb16833_c35/flp1/1073        | R01_cb16833_c35/flp1/1073  | R01_cb16833_c35/flp1/1073        | NA                          | R01_cb16833_c35/flp1/1073   |
| R01_cb12024_c3/f3p0/909          | NA                         | NA                               | NA                          | R01_cb12024_c3/f3p0/909     |
| R01_cb15473_c3/flp0/1657         | NA                         | R01_cb15473_c3/flp0/1657         | NA                          | NA                          |
| R01_cb3618_c25/flp0/2107         | NA                         | NA                               | NA                          | R01_cb3618_c25/flp0/2107    |
| R01_cb6399_c8/flp0/1599          | R01_cb6399_c8/flp0/1599    | R01_cb6399_c8/flp0/1599          | NA                          | NA                          |
| R01_cb12421_c44/flp0/727         | R01_cb12421_c44/flp0/727   | R01_cb12421_c44/flp0/727         | NA                          | NA                          |
| R01_cb12294_c3/flp0/669          | NA                         | R01_cb12294_c3/flp0/669          | NA                          | NA                          |
| R01_cb9402_c0/flp0/2094          | R01_cb9402_c0/flp0/2094    | R01_cb9402_c0/flp0/2094          | R01_cb9402_c0/flp0/2094     | R01_cb9402_c0/flp0/2094     |
| R01_cb3848_c7/flp0/3003          | NA                         | NA                               | NA                          | R01_cb3848_c7/flp0/3003     |
| R01_cb15930_c0/f2p0/418          | NA                         | R01_cb15930_c0/f2p0/418          | NA                          | R01_cb15930_c0/f2p0/418     |
| R01_cb17371_c3/flp0/636          | NA                         | R01_cb17371_c3/flp0/636          | R01_cb17371_c3/flp0/636     | R01_cb17371_c3/flp0/636     |
| R01_cb14940_c3/flp0/796          | NA                         | R01_cb14940_c3/flp0/796          | R01_cb14940_c3/flp0/796     | R01_cb14940_c3/flp0/796     |
| R01_cb8564_c49593/flp0/2995      | NA                         | R01_cb8564_c49593/flp0/2995      | NA                          | NA                          |
| R01_cb16425_c8/flp0/974          | NA                         | R01_cb16425_c8/flp0/974          | R01_cb16425_c8/flp0/974     | R01_cb16425_c8/flp0/974     |
| R01_cb8148_c9/flp0/1061          | R01_cb8148_c9/flp0/1061    | R01_cb8148_c9/flp0/1061          | R01_cb8148_c9/flp0/1061     | R01_cb8148_c9/flp0/1061     |
| R01_cb14344_c7/flp0/1144         | NA                         | R01_cb14344_c7/flp0/1144         | R01_cb14344_c7/flp0/1144    | R01_cb14344_c7/flp0/1144    |
| R01_cb18456_c1862/flp0/1739      | R01_cb18456_c1862/flp0/173 | R01_cb18456_c1862/flp0/1739      | R01_cb18456_c1862/flp0/1739 | R01_cb18456_c1862/flp0/1739 |

|                             |                            |                             |                             |                             |
|-----------------------------|----------------------------|-----------------------------|-----------------------------|-----------------------------|
|                             | 9                          |                             |                             |                             |
| R01_cb6948_c5/flp0/2544     | NA                         | NA                          | NA                          | R01_cb6948_c5/flp0/2544     |
| R01_cb8564_c81685/flp0/2236 | NA                         | R01_cb8564_c81685/flp0/2236 | R01_cb8564_c81685/flp0/2236 | R01_cb8564_c81685/flp0/2236 |
| R01_cb17678_c1/flp0/335     | R01_cb17678_c1/flp0/335    | R01_cb17678_c1/flp0/335     | R01_cb17678_c1/flp0/335     | R01_cb17678_c1/flp0/335     |
| R01_cb8564_c4864/flp0/3201  | R01_cb8564_c4864/flp0/3201 | R01_cb8564_c4864/flp0/3201  | NA                          | R01_cb8564_c4864/flp0/3201  |
| R01_cb8564_c13085/flp0/2474 | NA                         | NA                          | NA                          | R01_cb8564_c13085/flp0/2474 |
| R01_cb11128_c7/flp0/1535    | NA                         | NA                          | NA                          | R01_cb11128_c7/flp0/1535    |
| R01_cb8746_c1/flp0/2389     | NA                         | NA                          | NA                          | R01_cb8746_c1/flp0/2389     |
| R01_cb8564_c121285/flp0/285 | NA                         | R01_cb8564_c121285/flp0/285 | NA                          | R01_cb8564_c121285/flp0/285 |
| 2                           |                            | 2                           |                             | 2                           |
| R01_cb5000_c25/flp0/5093    | NA                         | R01_cb5000_c25/flp0/5093    | R01_cb5000_c25/flp0/5093    | NA                          |
| R01_cb13161_c20/flp0/560    | R01_cb13161_c20/flp0/560   | R01_cb13161_c20/flp0/560    | R01_cb13161_c20/flp0/560    | R01_cb13161_c20/flp0/560    |
| R01_cb17356_c0/flp0/1272    | NA                         | NA                          | NA                          | R01_cb17356_c0/flp0/1272    |
| R01_cb18526_c10/flp0/647    | NA                         | R01_cb18526_c10/flp0/647    | NA                          | NA                          |
| R01_cb8564_c130175/flp0/189 | NA                         | R01_cb8564_c130175/flp0/189 | NA                          | NA                          |
| 3                           |                            | 3                           |                             |                             |
| R01_cb10496_c2/flp0/2309    | NA                         | NA                          | NA                          | R01_cb10496_c2/flp0/2309    |
| R01_cb9858_c2/flp0/2061     | NA                         | R01_cb9858_c2/flp0/2061     | R01_cb9858_c2/flp0/2061     | R01_cb9858_c2/flp0/2061     |
| R01_cb14148_c0/flp0/1292    | NA                         | NA                          | R01_cb14148_c0/flp0/1292    | R01_cb14148_c0/flp0/1292    |
| R01_cb8564_c17126/flp0/3574 | NA                         | R01_cb8564_c17126/flp0/3574 | NA                          | NA                          |
| R01_cb4347_c1/f2p0/894      | NA                         | R01_cb4347_c1/f2p0/894      | R01_cb4347_c1/f2p0/894      | NA                          |
| R01_cb10237_c1/flp0/2822    | NA                         | NA                          | NA                          | R01_cb10237_c1/flp0/2822    |
| R01_cb16370_c3/flp0/633     | NA                         | R01_cb16370_c3/flp0/633     | NA                          | R01_cb16370_c3/flp0/633     |
| R01_cb17154_c0/f2p0/1071    | R01_cb17154_c0/f2p0/1071   | R01_cb17154_c0/f2p0/1071    | R01_cb17154_c0/f2p0/1071    | R01_cb17154_c0/f2p0/1071    |
| R01_cb4062_c1/flp0/3007     | R01_cb4062_c1/flp0/3007    | R01_cb4062_c1/flp0/3007     | R01_cb4062_c1/flp0/3007     | R01_cb4062_c1/flp0/3007     |
| R01_cb15473_c5/flp0/1662    | R01_cb15473_c5/flp0/1662   | R01_cb15473_c5/flp0/1662    | NA                          | R01_cb15473_c5/flp0/1662    |

|                                  |                                   |                                  |                             |                             |
|----------------------------------|-----------------------------------|----------------------------------|-----------------------------|-----------------------------|
| R01_cb18456_c4760/f1p3/486       | R01_cb18456_c4760/f1p3/486        | R01_cb18456_c4760/f1p3/486       | NA                          | R01_cb18456_c4760/f1p3/486  |
| R01_cb6456_c3/f1p0/2341          | R01_cb6456_c3/f1p0/2341           | R01_cb6456_c3/f1p0/2341          | R01_cb6456_c3/f1p0/2341     | R01_cb6456_c3/f1p0/2341     |
| R01_cb15950_c5/f1p0/1531         | NA                                | NA                               | NA                          | R01_cb15950_c5/f1p0/1531    |
| R01_cb12811_c9/f1p0/925          | R01_cb12811_c9/f1p0/925           | R01_cb12811_c9/f1p0/925          | R01_cb12811_c9/f1p0/925     | R01_cb12811_c9/f1p0/925     |
| R01_cb18409_c73/f1p0/406         | R01_cb18409_c73/f1p0/406          | R01_cb18409_c73/f1p0/406         | R01_cb18409_c73/f1p0/406    | R01_cb18409_c73/f1p0/406    |
| R01_cb9448_c11/f2p0/1755         | NA                                | NA                               | NA                          | R01_cb9448_c11/f2p0/1755    |
| R01_cb8564_c69061/f2p0/2215      | NA                                | NA                               | R01_cb8564_c69061/f2p0/2215 | R01_cb8564_c69061/f2p0/2215 |
| R01_cb4054_c2/f1p0/2025          | NA                                | R01_cb4054_c2/f1p0/2025          | NA                          | NA                          |
| R01_cb8831_c12/f1p1/2130         | NA                                | NA                               | NA                          | R01_cb8831_c12/f1p1/2130    |
| R01_cb8564_c90750/f1p0/2475      | NA                                | NA                               | NA                          | R01_cb8564_c90750/f1p0/2475 |
| R01_cb13178_c21/f1p0/503         | NA                                | R01_cb13178_c21/f1p0/503         | NA                          | NA                          |
| R01_cb17807_c0/f1p0/822          | NA                                | NA                               | NA                          | R01_cb17807_c0/f1p0/822     |
| R01_cb17381_c6/f1p0/1452         | NA                                | R01_cb17381_c6/f1p0/1452         | NA                          | R01_cb17381_c6/f1p0/1452    |
| R01_cb17197_c2/f1p0/403          | R01_cb17197_c2/f1p0/403           | R01_cb17197_c2/f1p0/403          | R01_cb17197_c2/f1p0/403     | R01_cb17197_c2/f1p0/403     |
| R01_cb16460_c2/f1p0/604          | NA                                | R01_cb16460_c2/f1p0/604          | R01_cb16460_c2/f1p0/604     | R01_cb16460_c2/f1p0/604     |
| R01_cb8564_c88874/f1p0/3390      | NA                                | R01_cb8564_c88874/f1p0/3390      | R01_cb8564_c88874/f1p0/3390 | NA                          |
| R01_cb12228_c10/f1p0/1781        | NA                                | R01_cb12228_c10/f1p0/1781        | NA                          | NA                          |
| R01_cb16450_c0/f5p0/1015         | NA                                | R01_cb16450_c0/f5p0/1015         | NA                          | NA                          |
| R01_cb8569_c13/f1p0/825          | R01_cb8569_c13/f1p0/825           | R01_cb8569_c13/f1p0/825          | NA                          | R01_cb8569_c13/f1p0/825     |
| R01_cb8564_c120546/f1p0/246<br>7 | R01_cb8564_c120546/f1p0/246<br>67 | R01_cb8564_c120546/f1p0/246<br>7 | NA                          | NA                          |
| R01_cb392_c0/f2p1/1752           | R01_cb392_c0/f2p1/1752            | R01_cb392_c0/f2p1/1752           | R01_cb392_c0/f2p1/1752      | R01_cb392_c0/f2p1/1752      |
| R01_cb17239_c1/f1p0/566          | R01_cb17239_c1/f1p0/566           | R01_cb17239_c1/f1p0/566          | NA                          | R01_cb17239_c1/f1p0/566     |
| R01_cb7390_c12/f1p0/1196         | NA                                | R01_cb7390_c12/f1p0/1196         | NA                          | NA                          |
| R01_cb3502_c6/f1p0/2135          | NA                                | NA                               | NA                          | R01_cb3502_c6/f1p0/2135     |
| R01_cb18523_c2/f1p0/5611         | NA                                | R01_cb18523_c2/f1p0/5611         | NA                          | NA                          |

|                              |                          |                              |                          |                              |
|------------------------------|--------------------------|------------------------------|--------------------------|------------------------------|
| R01_cb15591_c3/flp1/907      | NA                       | R01_cb15591_c3/flp1/907      | NA                       | NA                           |
| R01_cb13178_c16/flp0/584     | NA                       | R01_cb13178_c16/flp0/584     | NA                       | NA                           |
| R01_cb14023_c1/flp0/818      | NA                       | NA                           | NA                       | R01_cb14023_c1/flp0/818      |
| R01_cb8564_c128844/flp0/2505 | NA                       | R01_cb8564_c128844/flp0/2505 | NA                       | R01_cb8564_c128844/flp0/2505 |
| R01_cb8564_c117557/flp0/2730 | NA                       | R01_cb8564_c117557/flp0/2730 | NA                       | NA                           |
| R01_cb7982_c4/flp0/1981      | NA                       | NA                           | NA                       | R01_cb7982_c4/flp0/1981      |
| R01_cb17813_c0/flp0/1627     | NA                       | R01_cb17813_c0/flp0/1627     | NA                       | NA                           |
| R01_cb2804_c73/flp0/3721     | NA                       | R01_cb2804_c73/flp0/3721     | NA                       | NA                           |
| R01_cb3861_c0/flp0/3506      | NA                       | R01_cb3861_c0/flp0/3506      | NA                       | NA                           |
| R01_cb7806_c5/flp0/1767      | NA                       | R01_cb7806_c5/flp0/1767      | R01_cb7806_c5/flp0/1767  | R01_cb7806_c5/flp0/1767      |
| R01_cb6950_c35/flp0/1271     | NA                       | NA                           | NA                       | R01_cb6950_c35/flp0/1271     |
| R01_cb10536_c1/flp0/3926     | NA                       | R01_cb10536_c1/flp0/3926     | R01_cb10536_c1/flp0/3926 | R01_cb10536_c1/flp0/3926     |
| R01_cb17737_c0/flp0/1106     | NA                       | R01_cb17737_c0/flp0/1106     | R01_cb17737_c0/flp0/1106 | NA                           |
| R01_cb3702_c2/flp0/3550      | NA                       | R01_cb3702_c2/flp0/3550      | NA                       | NA                           |
| R01_cb3716_c10/flp0/3127     | NA                       | NA                           | NA                       | R01_cb3716_c10/flp0/3127     |
| R01_cb8564_c4698/flp0/3199   | NA                       | R01_cb8564_c4698/flp0/3199   | NA                       | NA                           |
| R01_cb11450_c1/flp0/2051     | NA                       | NA                           | R01_cb11450_c1/flp0/2051 | R01_cb11450_c1/flp0/2051     |
| R01_cb14263_c0/f2p0/1061     | R01_cb14263_c0/f2p0/1061 | R01_cb14263_c0/f2p0/1061     | R01_cb14263_c0/f2p0/1061 | R01_cb14263_c0/f2p0/1061     |
| R01_cb8564_c11142/flp0/2111  | NA                       | NA                           | NA                       | R01_cb8564_c11142/flp0/2111  |
| R01_cb16765_c1/flp0/782      | NA                       | NA                           | R01_cb16765_c1/flp0/782  | R01_cb16765_c1/flp0/782      |
| R01_cb8564_c626/f4p1/2238    | NA                       | NA                           | NA                       | R01_cb8564_c626/f4p1/2238    |
| R01_cb10818_c2/flp0/3390     | NA                       | R01_cb10818_c2/flp0/3390     | NA                       | NA                           |
| R01_cb16856_c2/f2p0/1185     | NA                       | NA                           | NA                       | R01_cb16856_c2/f2p0/1185     |
| R01_cb10627_c1/f2p0/763      | NA                       | R01_cb10627_c1/f2p0/763      | NA                       | NA                           |

|                              |                             |                              |                              |                              |
|------------------------------|-----------------------------|------------------------------|------------------------------|------------------------------|
| R01_cb6802_c62/flp0/2495     | R01_cb6802_c62/flp0/2495    | R01_cb6802_c62/flp0/2495     | R01_cb6802_c62/flp0/2495     | NA                           |
| R01_cb625_c14/flp0/2067      | R01_cb625_c14/flp0/2067     | R01_cb625_c14/flp0/2067      | NA                           | R01_cb625_c14/flp0/2067      |
| R01_cb16722_c0/f2p0/511      | R01_cb16722_c0/f2p0/511     | R01_cb16722_c0/f2p0/511      | NA                           | R01_cb16722_c0/f2p0/511      |
| R01_cb14878_c0/flp0/762      | NA                          | R01_cb14878_c0/flp0/762      | R01_cb14878_c0/flp0/762      | R01_cb14878_c0/flp0/762      |
| R01_cb7171_c18/flp0/2147     | NA                          | NA                           | NA                           | R01_cb7171_c18/flp0/2147     |
| R01_cb8564_c116398/flp1/2024 | NA                          | R01_cb8564_c116398/flp1/2024 | R01_cb8564_c116398/flp1/2024 | NA                           |
| R01_cb9987_c1/flp1/1892      | NA                          | R01_cb9987_c1/flp1/1892      | NA                           | R01_cb9987_c1/flp1/1892      |
| R01_cb8564_c1804/flp0/3212   | NA                          | R01_cb8564_c1804/flp0/3212   | R01_cb8564_c1804/flp0/3212   | R01_cb8564_c1804/flp0/3212   |
| R01_cb2243_c0/flp0/3999      | NA                          | NA                           | NA                           | R01_cb2243_c0/flp0/3999      |
| R01_cb8564_c123066/flp0/2932 | NA                          | NA                           | R01_cb8564_c123066/flp0/2932 | R01_cb8564_c123066/flp0/2932 |
| R01_cb8564_c41379/flp0/3270  | R01_cb8564_c41379/flp0/3270 | R01_cb8564_c41379/flp0/3270  | R01_cb8564_c41379/flp0/3270  | R01_cb8564_c41379/flp0/3270  |
| R01_cb3992_c1/flp0/3457      | NA                          | NA                           | NA                           | R01_cb3992_c1/flp0/3457      |
| R01_cb1119_c15/flp0/2159     | NA                          | R01_cb1119_c15/flp0/2159     | NA                           | NA                           |
| R01_cb6499_c15/flp1/1972     | NA                          | R01_cb6499_c15/flp1/1972     | NA                           | NA                           |
| R01_cb14751_c2/flp0/688      | NA                          | R01_cb14751_c2/flp0/688      | NA                           | NA                           |
| R01_cb640_c6/flp0/3220       | NA                          | NA                           | R01_cb640_c6/flp0/3220       | NA                           |
| R01_cb5378_c1/flp0/2801      | NA                          | NA                           | NA                           | R01_cb5378_c1/flp0/2801      |
| R01_cb9988_c3/flp0/1707      | R01_cb9988_c3/flp0/1707     | NA                           | NA                           | NA                           |
| R01_cb1863_c29/flp0/1662     | NA                          | NA                           | NA                           | R01_cb1863_c29/flp0/1662     |
| R01_cb6615_c29/flp0/857      | NA                          | R01_cb6615_c29/flp0/857      | R01_cb6615_c29/flp0/857      | R01_cb6615_c29/flp0/857      |
| R01_cb18456_c6432/flp0/607   | R01_cb18456_c6432/flp0/607  | R01_cb18456_c6432/flp0/607   | NA                           | NA                           |
| R01_cb1839_c5/flp0/4173      | NA                          | NA                           | NA                           | R01_cb1839_c5/flp0/4173      |
| R01_cb9409_c3/flp0/1367      | NA                          | NA                           | NA                           | R01_cb9409_c3/flp0/1367      |

|                              |                          |                              |                          |                             |
|------------------------------|--------------------------|------------------------------|--------------------------|-----------------------------|
| R01_cb8564_c72986/f1p0/2988  | NA                       | NA                           | NA                       | R01_cb8564_c72986/f1p0/2988 |
| R01_cb3863_c8/f3p0/3240      | NA                       | NA                           | NA                       | R01_cb3863_c8/f3p0/3240     |
| R01_cb17315_c1/f1p0/604      | NA                       | R01_cb17315_c1/f1p0/604      | NA                       | NA                          |
| R01_cb8564_c114001/f1p0/2053 | NA                       | R01_cb8564_c114001/f1p0/2053 | NA                       | NA                          |
| R01_cb4085_c2/f1p0/1476      | NA                       | R01_cb4085_c2/f1p0/1476      | NA                       | NA                          |
| R01_cb14328_c3/f1p0/802      | NA                       | NA                           | R01_cb14328_c3/f1p0/802  | R01_cb14328_c3/f1p0/802     |
| R01_cb8564_c38417/f1p0/2173  | NA                       | NA                           | NA                       | R01_cb8564_c38417/f1p0/2173 |
| R01_cb6419_c21/f1p0/871      | NA                       | R01_cb6419_c21/f1p0/871      | NA                       | NA                          |
| R01_cb14907_c0/f1p0/1589     | NA                       | R01_cb14907_c0/f1p0/1589     | NA                       | NA                          |
| R01_cb8564_c15719/f1p0/1926  | NA                       | NA                           | NA                       | R01_cb8564_c15719/f1p0/1926 |
| R01_cb13463_c16/f1p0/418     | R01_cb13463_c16/f1p0/418 | R01_cb13463_c16/f1p0/418     | R01_cb13463_c16/f1p0/418 | R01_cb13463_c16/f1p0/418    |
| R01_cb16819_c2/f7p1/661      | NA                       | NA                           | NA                       | R01_cb16819_c2/f7p1/661     |
| R01_cb10540_c4/f1p0/2579     | NA                       | R01_cb10540_c4/f1p0/2579     | NA                       | NA                          |
| R01_cb18752_c1/f1p0/1296     | NA                       | R01_cb18752_c1/f1p0/1296     | NA                       | NA                          |
| R01_cb15094_c2/f1p0/1108     | NA                       | NA                           | NA                       | R01_cb15094_c2/f1p0/1108    |
| R01_cb2970_c2/f2p0/415       | NA                       | R01_cb2970_c2/f2p0/415       | NA                       | R01_cb2970_c2/f2p0/415      |
| R01_cb1905_c25/f1p0/2081     | NA                       | R01_cb1905_c25/f1p0/2081     | R01_cb1905_c25/f1p0/2081 | NA                          |
| R01_cb8120_c6/f1p0/2284      | NA                       | NA                           | NA                       | R01_cb8120_c6/f1p0/2284     |
| R01_cb17610_c6/f1p0/1790     | NA                       | NA                           | NA                       | R01_cb17610_c6/f1p0/1790    |
| R01_cb5452_c0/f1p0/3097      | NA                       | NA                           | NA                       | R01_cb5452_c0/f1p0/3097     |
| R01_cb17000_c0/f2p0/491      | R01_cb17000_c0/f2p0/491  | R01_cb17000_c0/f2p0/491      | R01_cb17000_c0/f2p0/491  | R01_cb17000_c0/f2p0/491     |
| R01_cb1155_c18/f1p1/4197     | NA                       | NA                           | NA                       | R01_cb1155_c18/f1p1/4197    |
| R01_cb13884_c1/f9p0/539      | R01_cb13884_c1/f9p0/539  | NA                           | R01_cb13884_c1/f9p0/539  | R01_cb13884_c1/f9p0/539     |
| R01_cb10795_c0/f1p0/1581     | NA                       | NA                           | NA                       | R01_cb10795_c0/f1p0/1581    |
| R01_cb10993_c2/f1p0/1320     | NA                       | NA                           | NA                       | R01_cb10993_c2/f1p0/1320    |

|                             |                             |                             |                             |                             |
|-----------------------------|-----------------------------|-----------------------------|-----------------------------|-----------------------------|
| R01_cb3808_c2/f1p0/3519     | NA                          | NA                          | NA                          | R01_cb3808_c2/f1p0/3519     |
| R01_cb8564_c68676/f6p1/2219 | NA                          | R01_cb8564_c68676/f6p1/2219 | R01_cb8564_c68676/f6p1/2219 | R01_cb8564_c68676/f6p1/2219 |
| R01_cb7533_c1/f4p0/2243     | NA                          | NA                          | NA                          | R01_cb7533_c1/f4p0/2243     |
| R01_cb8564_c78463/f1p0/2428 | NA                          | R01_cb8564_c78463/f1p0/2428 | NA                          | R01_cb8564_c78463/f1p0/2428 |
| R01_cb18456_c5763/f1p0/1775 | NA                          | R01_cb18456_c5763/f1p0/1775 | NA                          | R01_cb18456_c5763/f1p0/1775 |
| R01_cb3320_c16/f1p0/2305    | NA                          | R01_cb3320_c16/f1p0/2305    | R01_cb3320_c16/f1p0/2305    | R01_cb3320_c16/f1p0/2305    |
| R01_cb13165_c1/f1p0/533     | R01_cb13165_c1/f1p0/533     | R01_cb13165_c1/f1p0/533     | NA                          | R01_cb13165_c1/f1p0/533     |
| R01_cb8970_c2/f1p0/1764     | NA                          | R01_cb8970_c2/f1p0/1764     | NA                          | NA                          |
| R01_cb8564_c23681/f1p0/2579 | NA                          | R01_cb8564_c23681/f1p0/2579 | NA                          | R01_cb8564_c23681/f1p0/2579 |
| R01_cb15853_c1/f6p1/539     | NA                          | R01_cb15853_c1/f6p1/539     | NA                          | R01_cb15853_c1/f6p1/539     |
| R01_cb5674_c0/f1p0/3039     | R01_cb5674_c0/f1p0/3039     | R01_cb5674_c0/f1p0/3039     | R01_cb5674_c0/f1p0/3039     | NA                          |
| R01_cb14656_c2/f1p0/589     | R01_cb14656_c2/f1p0/589     | R01_cb14656_c2/f1p0/589     | R01_cb14656_c2/f1p0/589     | R01_cb14656_c2/f1p0/589     |
| R01_cb13488_c1/f2p0/745     | NA                          | NA                          | NA                          | R01_cb13488_c1/f2p0/745     |
| R01_cb12893_c14/f2p0/815    | NA                          | R01_cb12893_c14/f2p0/815    | R01_cb12893_c14/f2p0/815    | NA                          |
| R01_cb7254_c9/f1p0/2112     | NA                          | NA                          | NA                          | R01_cb7254_c9/f1p0/2112     |
| R01_cb4609_c4/f1p0/756      | NA                          | R01_cb4609_c4/f1p0/756      | NA                          | R01_cb4609_c4/f1p0/756      |
| R01_cb8564_c91034/f1p1/3457 | R01_cb8564_c91034/f1p1/3457 | R01_cb8564_c91034/f1p1/3457 | NA                          | NA                          |
| R01_cb18830_c1/f1p0/6537    | NA                          | R01_cb18830_c1/f1p0/6537    | NA                          | NA                          |
| R01_cb12174_c0/f3p0/655     | NA                          | R01_cb12174_c0/f3p0/655     | NA                          | R01_cb12174_c0/f3p0/655     |
| R01_cb11204_c1/f1p0/2933    | NA                          | R01_cb11204_c1/f1p0/2933    | NA                          | R01_cb11204_c1/f1p0/2933    |
| R01_cb8122_c8/f10p0/2218    | NA                          | NA                          | NA                          | R01_cb8122_c8/f10p0/2218    |
| R01_cb2806_c1/f1p0/3022     | NA                          | NA                          | NA                          | R01_cb2806_c1/f1p0/3022     |
| R01_cb18456_c7565/f1p0/1269 | R01_cb18456_c7565/f1p0/1269 | R01_cb18456_c7565/f1p0/1269 | R01_cb18456_c7565/f1p0/1269 | R01_cb18456_c7565/f1p0/1269 |
| R01_cb16979_c11/f1p0/914    | NA                          | R01_cb16979_c11/f1p0/914    | NA                          | NA                          |



|                             |                          |                             |                             |                             |
|-----------------------------|--------------------------|-----------------------------|-----------------------------|-----------------------------|
| R01_cb8564_c77752/flp1/3809 | NA                       | R01_cb8564_c77752/flp1/3809 | NA                          | NA                          |
| R01_cb15588_c0/flp0/577     | NA                       | R01_cb15588_c0/flp0/577     | NA                          | R01_cb15588_c0/flp0/577     |
| R01_cb13184_c0/f2p0/607     | NA                       | R01_cb13184_c0/f2p0/607     | R01_cb13184_c0/f2p0/607     | R01_cb13184_c0/f2p0/607     |
| R01_cb3536_c2/flp0/3608     | NA                       | R01_cb3536_c2/flp0/3608     | NA                          | R01_cb3536_c2/flp0/3608     |
| R01_cb8564_c99491/flp0/2703 | NA                       | R01_cb8564_c99491/flp0/2703 | NA                          | R01_cb8564_c99491/flp0/2703 |
| R01_cb8564_c46039/flp0/2420 | NA                       | NA                          | R01_cb8564_c46039/flp0/2420 | R01_cb8564_c46039/flp0/2420 |
| R01_cb12496_c12/flp0/774    | NA                       | R01_cb12496_c12/flp0/774    | NA                          | NA                          |
| R01_cb8564_c11099/flp1/4643 | NA                       | R01_cb8564_c11099/flp1/4643 | NA                          | NA                          |
| R01_cb5943_c6/flp0/1364     | NA                       | NA                          | NA                          | R01_cb5943_c6/flp0/1364     |
| R01_cb12552_c3/flp0/779     | NA                       | NA                          | NA                          | R01_cb12552_c3/flp0/779     |
| R01_cb14019_c6/flp0/1358    | R01_cb14019_c6/flp0/1358 | R01_cb14019_c6/flp0/1358    | R01_cb14019_c6/flp0/1358    | R01_cb14019_c6/flp0/1358    |
| R01_cb8564_c85207/flp0/2727 | NA                       | R01_cb8564_c85207/flp0/2727 | NA                          | NA                          |
| R01_cb5249_c3/flp0/3143     | NA                       | R01_cb5249_c3/flp0/3143     | NA                          | R01_cb5249_c3/flp0/3143     |
| R01_cb11535_c0/flp0/725     | R01_cb11535_c0/flp0/725  | R01_cb11535_c0/flp0/725     | R01_cb11535_c0/flp0/725     | R01_cb11535_c0/flp0/725     |
| R01_cb17869_c0/f2p0/1665    | NA                       | NA                          | NA                          | R01_cb17869_c0/f2p0/1665    |
| R01_cb16993_c2/flp0/1461    | NA                       | NA                          | R01_cb16993_c2/flp0/1461    | NA                          |
| R01_cb8564_c24445/flp0/4124 | NA                       | NA                          | NA                          | R01_cb8564_c24445/flp0/4124 |
| R01_cb435_c5/flp0/1428      | NA                       | NA                          | NA                          | R01_cb435_c5/flp0/1428      |
| R01_cb8564_c69065/f2p0/3980 | NA                       | R01_cb8564_c69065/f2p0/3980 | R01_cb8564_c69065/f2p0/3980 | R01_cb8564_c69065/f2p0/3980 |
| R01_cb5862_c1/flp0/1944     | NA                       | R01_cb5862_c1/flp0/1944     | R01_cb5862_c1/flp0/1944     | R01_cb5862_c1/flp0/1944     |
| R01_cb2845_c11/flp0/3300    | NA                       | NA                          | NA                          | R01_cb2845_c11/flp0/3300    |
| R01_cb8564_c121611/flp0/232 | NA                       | R01_cb8564_c121611/flp0/232 | R01_cb8564_c121611/flp0/232 | R01_cb8564_c121611/flp0/232 |
| 3                           |                          | 3                           | 3                           | 3                           |
| R01_cb8564_c81815/flp0/2165 | NA                       | R01_cb8564_c81815/flp0/2165 | R01_cb8564_c81815/flp0/2165 | R01_cb8564_c81815/flp0/2165 |
| R01_cb2929_c8/flp0/1889     | NA                       | NA                          | R01_cb2929_c8/flp0/1889     | NA                          |
| R01_cb14634_c28/flp1/2221   | NA                       | NA                          | NA                          | R01_cb14634_c28/flp1/2221   |

|                             |                             |                             |                             |                             |
|-----------------------------|-----------------------------|-----------------------------|-----------------------------|-----------------------------|
| R01_cb7947_c5/flp1/2305     | NA                          | NA                          | NA                          | R01_cb7947_c5/flp1/2305     |
| R01_cb4370_c6/flp0/2015     | NA                          | NA                          | NA                          | R01_cb4370_c6/flp0/2015     |
| R01_cb9154_c6/flp0/1781     | NA                          | NA                          | NA                          | R01_cb9154_c6/flp0/1781     |
| R01_cb2826_c10/flp0/2973    | R01_cb2826_c10/flp0/2973    | R01_cb2826_c10/flp0/2973    | NA                          | NA                          |
| R01_cb15778_c4/flp0/1256    | NA                          | NA                          | NA                          | R01_cb15778_c4/flp0/1256    |
| R01_cb5026_c2/flp0/3198     | NA                          | R01_cb5026_c2/flp0/3198     | NA                          | R01_cb5026_c2/flp0/3198     |
| R01_cb4166_c5/flp0/2886     | NA                          | R01_cb4166_c5/flp0/2886     | NA                          | NA                          |
| R01_cb644_c13/flp0/1014     | NA                          | NA                          | NA                          | R01_cb644_c13/flp0/1014     |
| R01_cb8441_c7/flp0/1376     | NA                          | NA                          | NA                          | R01_cb8441_c7/flp0/1376     |
| R01_cb8564_c935/f2p0/2617   | NA                          | R01_cb8564_c935/f2p0/2617   | NA                          | NA                          |
| R01_cb10638_c1/flp0/3205    | NA                          | R01_cb10638_c1/flp0/3205    | NA                          | NA                          |
| R01_cb10801_c4/flp0/551     | NA                          | R01_cb10801_c4/flp0/551     | NA                          | NA                          |
| R01_cb3618_c23/flp0/2587    | NA                          | NA                          | NA                          | R01_cb3618_c23/flp0/2587    |
| R01_cb11924_c23/fl157p2/558 | R01_cb11924_c23/fl157p2/558 | R01_cb11924_c23/fl157p2/558 | R01_cb11924_c23/fl157p2/558 | NA                          |
| R01_cb12329_c13/flp0/1468   | NA                          | NA                          | NA                          | R01_cb12329_c13/flp0/1468   |
| R01_cb10272_c30/flp2/1750   | NA                          | NA                          | NA                          | R01_cb10272_c30/flp2/1750   |
| R01_cb17119_c2/f4p0/717     | NA                          | NA                          | NA                          | R01_cb17119_c2/f4p0/717     |
| R01_cb5976_c2/flp0/2282     | NA                          | R01_cb5976_c2/flp0/2282     | NA                          | R01_cb5976_c2/flp0/2282     |
| R01_cb13803_c6/flp0/645     | NA                          | R01_cb13803_c6/flp0/645     | NA                          | NA                          |
| R01_cb3000_c2/flp0/2342     | NA                          | R01_cb3000_c2/flp0/2342     | R01_cb3000_c2/flp0/2342     | R01_cb3000_c2/flp0/2342     |
| R01_cb6935_c0/flp0/2736     | NA                          | R01_cb6935_c0/flp0/2736     | NA                          | NA                          |
| R01_cb8564_c1547/flp0/2233  | R01_cb8564_c1547/flp0/2233  | NA                          | NA                          | NA                          |
| R01_cb708_c5/flp0/2959      | R01_cb708_c5/flp0/2959      | R01_cb708_c5/flp0/2959      | R01_cb708_c5/flp0/2959      | R01_cb708_c5/flp0/2959      |
| R01_cb18456_c3894/flp0/1063 | R01_cb18456_c3894/flp0/1063 | R01_cb18456_c3894/flp0/1063 | NA                          | R01_cb18456_c3894/flp0/1063 |
| R01_cb9928_c5/flp0/2028     | NA                          | NA                          | NA                          | R01_cb9928_c5/flp0/2028     |

|                             |                          |                             |                             |                             |
|-----------------------------|--------------------------|-----------------------------|-----------------------------|-----------------------------|
| R01_cb12641_c17/flp0/888    | NA                       | NA                          | NA                          | R01_cb12641_c17/flp0/888    |
| R01_cb380_c7/flp0/4788      | NA                       | R01_cb380_c7/flp0/4788      | NA                          | NA                          |
| R01_cb9112_c0/flp0/2186     | NA                       | R01_cb9112_c0/flp0/2186     | R01_cb9112_c0/flp0/2186     | R01_cb9112_c0/flp0/2186     |
| R01_cb6737_c12/flp0/4635    | NA                       | R01_cb6737_c12/flp0/4635    | NA                          | R01_cb6737_c12/flp0/4635    |
| R01_cb10893_c1/flp0/2844    | NA                       | R01_cb10893_c1/flp0/2844    | NA                          | NA                          |
| R01_cb13856_c1/flp0/573     | NA                       | NA                          | R01_cb13856_c1/flp0/573     | NA                          |
| R01_cb6446_c54/flp0/1098    | NA                       | R01_cb6446_c54/flp0/1098    | NA                          | NA                          |
| R01_cb18001_c1/flp1/909     | NA                       | NA                          | NA                          | R01_cb18001_c1/flp1/909     |
| R01_cb13178_c25/flp0/546    | NA                       | R01_cb13178_c25/flp0/546    | NA                          | NA                          |
| R01_cb9532_c4/flp0/1876     | NA                       | R01_cb9532_c4/flp0/1876     | NA                          | NA                          |
| R01_cb8564_c78182/flp0/2217 | NA                       | R01_cb8564_c78182/flp0/2217 | R01_cb8564_c78182/flp0/2217 | R01_cb8564_c78182/flp0/2217 |
| R01_cb12329_c22/flp0/1574   | NA                       | NA                          | NA                          | R01_cb12329_c22/flp0/1574   |
| R01_cb12837_c22/flp3/718    | NA                       | R01_cb12837_c22/flp3/718    | NA                          | NA                          |
| R01_cb10015_c418/flp1/722   | NA                       | R01_cb10015_c418/flp1/722   | NA                          | NA                          |
| R01_cb2022_c16/flp0/1807    | NA                       | NA                          | NA                          | R01_cb2022_c16/flp0/1807    |
| R01_cb16633_c1/f2p0/1768    | R01_cb16633_c1/f2p0/1768 | R01_cb16633_c1/f2p0/1768    | R01_cb16633_c1/f2p0/1768    | R01_cb16633_c1/f2p0/1768    |
| R01_cb15739_c2/flp0/1108    | NA                       | R01_cb15739_c2/flp0/1108    | NA                          | NA                          |
| R01_cb3632_c1/flp0/2963     | NA                       | NA                          | NA                          | R01_cb3632_c1/flp0/2963     |
| R01_cb2192_c1/flp0/3640     | NA                       | NA                          | NA                          | R01_cb2192_c1/flp0/3640     |
| R01_cb5987_c0/flp0/2971     | NA                       | NA                          | NA                          | R01_cb5987_c0/flp0/2971     |
| R01_cb13764_c1/flp0/821     | NA                       | NA                          | R01_cb13764_c1/flp0/821     | R01_cb13764_c1/flp0/821     |
| R01_cb13202_c20/flp0/706    | NA                       | R01_cb13202_c20/flp0/706    | NA                          | NA                          |
| R01_cb8751_c6/flp0/2115     | NA                       | NA                          | NA                          | R01_cb8751_c6/flp0/2115     |
| R01_cb17077_c0/flp0/1093    | NA                       | NA                          | NA                          | R01_cb17077_c0/flp0/1093    |
| R01_cb8400_c1/flp1/1838     | NA                       | NA                          | NA                          | R01_cb8400_c1/flp1/1838     |
| R01_cb8564_c12343/flp0/3935 | NA                       | R01_cb8564_c12343/flp0/3935 | NA                          | NA                          |

|                                  |                                 |                                  |                             |                             |
|----------------------------------|---------------------------------|----------------------------------|-----------------------------|-----------------------------|
| R01_cb3580_c61/flp1/2489         | NA                              | R01_cb3580_c61/flp1/2489         | NA                          | NA                          |
| R01_cb9859_c4/flp0/522           | NA                              | NA                               | NA                          | R01_cb9859_c4/flp0/522      |
| R01_cb10936_c3/flp0/1966         | NA                              | NA                               | NA                          | R01_cb10936_c3/flp0/1966    |
| R01_cb18456_c7990/f4p1/640       | NA                              | R01_cb18456_c7990/f4p1/640       | R01_cb18456_c7990/f4p1/640  | R01_cb18456_c7990/f4p1/640  |
| R01_cb18456_c4573/flp1/644       | NA                              | NA                               | NA                          | R01_cb18456_c4573/flp1/644  |
| R01_cb15945_c1/flp0/616          | NA                              | NA                               | NA                          | R01_cb15945_c1/flp0/616     |
| R01_cb16946_c0/f2p0/888          | NA                              | NA                               | NA                          | R01_cb16946_c0/f2p0/888     |
| R01_cb14786_c1/flp0/356          | R01_cb14786_c1/flp0/356         | R01_cb14786_c1/flp0/356          | R01_cb14786_c1/flp0/356     | R01_cb14786_c1/flp0/356     |
| R01_cb8564_c121996/flp0/214<br>2 | NA                              | R01_cb8564_c121996/flp0/214<br>2 | NA                          | NA                          |
| R01_cb15730_c4/flp0/669          | NA                              | R01_cb15730_c4/flp0/669          | NA                          | R01_cb15730_c4/flp0/669     |
| R01_cb8660_c15/flp0/5408         | NA                              | NA                               | NA                          | R01_cb8660_c15/flp0/5408    |
| R01_cb18456_c7490/flp0/1391      | NA                              | NA                               | NA                          | R01_cb18456_c7490/flp0/1391 |
| R01_cb3582_c10/flp1/2415         | NA                              | NA                               | NA                          | R01_cb3582_c10/flp1/2415    |
| R01_cb6278_c9/flp0/2648          | NA                              | NA                               | NA                          | R01_cb6278_c9/flp0/2648     |
| R01_cb2570_c12/flp0/2654         | NA                              | NA                               | NA                          | R01_cb2570_c12/flp0/2654    |
| R01_cb8564_c79763/flp0/4065      | NA                              | R01_cb8564_c79763/flp0/4065      | R01_cb8564_c79763/flp0/4065 | NA                          |
| R01_cb8564_c139516/flp0/196<br>4 | NA                              | R01_cb8564_c139516/flp0/196<br>4 | NA                          | NA                          |
| R01_cb7757_c13/flp0/609          | NA                              | NA                               | R01_cb7757_c13/flp0/609     | R01_cb7757_c13/flp0/609     |
| R01_cb6147_c36/flp0/2635         | NA                              | R01_cb6147_c36/flp0/2635         | NA                          | NA                          |
| R01_cb8564_c85066/flp0/1989      | NA                              | R01_cb8564_c85066/flp0/1989      | NA                          | R01_cb8564_c85066/flp0/1989 |
| R01_cb8564_c69138/f4p0/2133<br>3 | R01_cb8564_c69138/f4p0/213<br>3 | R01_cb8564_c69138/f4p0/2133      | NA                          | NA                          |
| R01_cb8564_c69666/flp0/4138      | NA                              | R01_cb8564_c69666/flp0/4138      | R01_cb8564_c69666/flp0/4138 | R01_cb8564_c69666/flp0/4138 |
| R01_cb4354_c14/flp0/3085         | NA                              | NA                               | NA                          | R01_cb4354_c14/flp0/3085    |

|                             |                             |                             |                             |                             |
|-----------------------------|-----------------------------|-----------------------------|-----------------------------|-----------------------------|
| R01_cb5641_c3/flp0/2521     | NA                          | NA                          | NA                          | R01_cb5641_c3/flp0/2521     |
| R01_cb9061_c17/flp0/2115    | NA                          | NA                          | NA                          | R01_cb9061_c17/flp0/2115    |
| R01_cb14316_c14/flp0/471    | R01_cb14316_c14/flp0/471    | R01_cb14316_c14/flp0/471    | R01_cb14316_c14/flp0/471    | R01_cb14316_c14/flp0/471    |
| R01_cb9506_c4/f2p0/1046     | NA                          | NA                          | NA                          | R01_cb9506_c4/f2p0/1046     |
| R01_cb8564_c47695/flp0/2559 | R01_cb8564_c47695/flp0/2559 | R01_cb8564_c47695/flp0/2559 | R01_cb8564_c47695/flp0/2559 | R01_cb8564_c47695/flp0/2559 |
| R01_cb2804_c111/flp0/2745   | NA                          | R01_cb2804_c111/flp0/2745   | R01_cb2804_c111/flp0/2745   | R01_cb2804_c111/flp0/2745   |
| R01_cb1894_c3/flp0/3285     | R01_cb1894_c3/flp0/3285     | R01_cb1894_c3/flp0/3285     | NA                          | R01_cb1894_c3/flp0/3285     |
| R01_cb18409_c90/flp0/1029   | R01_cb18409_c90/flp0/1029   | R01_cb18409_c90/flp0/1029   | R01_cb18409_c90/flp0/1029   | R01_cb18409_c90/flp0/1029   |
| R01_cb18100_c0/flp0/1804    | NA                          | NA                          | NA                          | R01_cb18100_c0/flp0/1804    |
| R01_cb8136_c4/flp0/2437     | NA                          | R01_cb8136_c4/flp0/2437     | NA                          | NA                          |
| R01_cb8564_c17217/flp0/4378 | NA                          | NA                          | NA                          | R01_cb8564_c17217/flp0/4378 |
| R01_cb5040_c17/flp1/3129    | NA                          | NA                          | NA                          | R01_cb5040_c17/flp1/3129    |
| R01_cb16752_c0/f4p2/1249    | NA                          | NA                          | NA                          | R01_cb16752_c0/f4p2/1249    |
| R01_cb18319_c0/flp0/1238    | R01_cb18319_c0/flp0/1238    | R01_cb18319_c0/flp0/1238    | R01_cb18319_c0/flp0/1238    | R01_cb18319_c0/flp0/1238    |
| R01_cb11625_c0/flp0/943     | NA                          | NA                          | NA                          | R01_cb11625_c0/flp0/943     |
| R01_cb4584_c1/f2p0/2926     | NA                          | NA                          | NA                          | R01_cb4584_c1/f2p0/2926     |
| R01_cb6538_c3/flp0/3815     | NA                          | R01_cb6538_c3/flp0/3815     | NA                          | NA                          |
| R01_cb3307_c6/f2p0/2644     | NA                          | R01_cb3307_c6/f2p0/2644     | NA                          | NA                          |
| R01_cb16383_c1/f2p0/1715    | NA                          | R01_cb16383_c1/f2p0/1715    | R01_cb16383_c1/f2p0/1715    | NA                          |
| R01_cb13501_c7/flp0/472     | NA                          | R01_cb13501_c7/flp0/472     | NA                          | NA                          |
| R01_cb1459_c5/flp2/3360     | NA                          | NA                          | NA                          | R01_cb1459_c5/flp2/3360     |
| R01_cb18456_c4716/flp0/503  | R01_cb18456_c4716/flp0/503  | R01_cb18456_c4716/flp0/503  | NA                          | R01_cb18456_c4716/flp0/503  |
| R01_cb8564_c35197/flp0/3278 | R01_cb8564_c35197/flp0/3278 | R01_cb8564_c35197/flp0/3278 | R01_cb8564_c35197/flp0/3278 | R01_cb8564_c35197/flp0/3278 |
| R01_cb18456_c4057/flp0/1655 | NA                          | R01_cb18456_c4057/flp0/1655 | NA                          | NA                          |

|                            |                          |                            |                          |                          |
|----------------------------|--------------------------|----------------------------|--------------------------|--------------------------|
| R01_cb16135_c1/flp0/747    | NA                       | NA                         | NA                       | R01_cb16135_c1/flp0/747  |
| R01_cb3703_c7/flp0/1455    | NA                       | NA                         | NA                       | R01_cb3703_c7/flp0/1455  |
| R01_cb2320_c7/flp0/4028    | NA                       | NA                         | NA                       | R01_cb2320_c7/flp0/4028  |
| R01_cb2640_c15/flp0/2346   | NA                       | R01_cb2640_c15/flp0/2346   | NA                       | NA                       |
| R01_cb13502_c0/f2p0/1503   | NA                       | R01_cb13502_c0/f2p0/1503   | NA                       | R01_cb13502_c0/f2p0/1503 |
| R01_cb10453_c0/f5p0/1132   | NA                       | NA                         | R01_cb10453_c0/f5p0/1132 | R01_cb10453_c0/f5p0/1132 |
| R01_cb14977_c4/flp0/1489   | R01_cb14977_c4/flp0/1489 | R01_cb14977_c4/flp0/1489   | R01_cb14977_c4/flp0/1489 | R01_cb14977_c4/flp0/1489 |
| R01_cb3585_c25/flp2/2717   | NA                       | R01_cb3585_c25/flp2/2717   | NA                       | NA                       |
| R01_cb9882_c6/flp0/1046    | R01_cb9882_c6/flp0/1046  | NA                         | R01_cb9882_c6/flp0/1046  | NA                       |
| R01_cb8564_c1362/flp0/3486 | NA                       | R01_cb8564_c1362/flp0/3486 | NA                       | NA                       |
| R01_cb7485_c2/flp0/3048    | R01_cb7485_c2/flp0/3048  | R01_cb7485_c2/flp0/3048    | R01_cb7485_c2/flp0/3048  | R01_cb7485_c2/flp0/3048  |
| R01_cb3794_c4/flp0/2414    | R01_cb3794_c4/flp0/2414  | R01_cb3794_c4/flp0/2414    | NA                       | NA                       |
| R01_cb2851_c6/flp0/2221    | NA                       | NA                         | NA                       | R01_cb2851_c6/flp0/2221  |
| R01_cb15882_c1/flp1/1493   | NA                       | NA                         | NA                       | R01_cb15882_c1/flp1/1493 |
| R01_cb11109_c3/flp0/1475   | NA                       | NA                         | NA                       | R01_cb11109_c3/flp0/1475 |
| R01_cb7401_c3/flp0/2319    | NA                       | NA                         | NA                       | R01_cb7401_c3/flp0/2319  |
| R01_cb18136_c0/flp0/569    | NA                       | R01_cb18136_c0/flp0/569    | NA                       | NA                       |
| R01_cb11931_c15/flp0/323   | R01_cb11931_c15/flp0/323 | R01_cb11931_c15/flp0/323   | R01_cb11931_c15/flp0/323 | R01_cb11931_c15/flp0/323 |
| R01_cb763_c7/flp0/3711     | NA                       | R01_cb763_c7/flp0/3711     | R01_cb763_c7/flp0/3711   | R01_cb763_c7/flp0/3711   |
| R01_cb11076_c0/flp0/1361   | NA                       | R01_cb11076_c0/flp0/1361   | R01_cb11076_c0/flp0/1361 | R01_cb11076_c0/flp0/1361 |
| R01_cb7096_c16/flp0/2638   | NA                       | NA                         | NA                       | R01_cb7096_c16/flp0/2638 |
| R01_cb13680_c7/flp0/428    | R01_cb13680_c7/flp0/428  | R01_cb13680_c7/flp0/428    | NA                       | R01_cb13680_c7/flp0/428  |
| R01_cb9798_c5/flp0/2665    | NA                       | R01_cb9798_c5/flp0/2665    | NA                       | NA                       |
| R01_cb3774_c35/flp0/2110   | NA                       | R01_cb3774_c35/flp0/2110   | NA                       | NA                       |
| R01_cb18303_c1/flp0/1171   | NA                       | R01_cb18303_c1/flp0/1171   | NA                       | R01_cb18303_c1/flp0/1171 |
| R01_cb3079_c6/flp0/2497    | NA                       | NA                         | NA                       | R01_cb3079_c6/flp0/2497  |

|                             |                             |                             |                             |                             |
|-----------------------------|-----------------------------|-----------------------------|-----------------------------|-----------------------------|
| R01_cb9614_c1/flp0/2097     | NA                          | NA                          | NA                          | R01_cb9614_c1/flp0/2097     |
| R01_cb8564_c22926/flp0/2247 | NA                          | R01_cb8564_c22926/flp0/2247 | NA                          | NA                          |
| R01_cb4614_c3/flp0/3038     | NA                          | R01_cb4614_c3/flp0/3038     | NA                          | NA                          |
| R01_cb14832_c1/flp0/797     | NA                          | NA                          | NA                          | R01_cb14832_c1/flp0/797     |
| R01_cb1178_c27/flp0/1197    | NA                          | NA                          | NA                          | R01_cb1178_c27/flp0/1197    |
| R01_cb5983_c6/flp0/923      | NA                          | NA                          | NA                          | R01_cb5983_c6/flp0/923      |
| R01_cb5902_c2/flp0/2787     | NA                          | R01_cb5902_c2/flp0/2787     | NA                          | NA                          |
| R01_cb11301_c2/flp0/1249    | NA                          | R01_cb11301_c2/flp0/1249    | NA                          | NA                          |
| R01_cb17604_c11/f36p0/533   | NA                          | NA                          | NA                          | R01_cb17604_c11/f36p0/533   |
| R01_cb8564_c18777/flp0/2490 | NA                          | R01_cb8564_c18777/flp0/2490 | NA                          | NA                          |
| R01_cb8564_c123394/flp0/234 | R01_cb8564_c123394/flp0/234 | R01_cb8564_c123394/flp0/234 | R01_cb8564_c123394/flp0/234 | R01_cb8564_c123394/flp0/234 |
| 1                           | 41                          | 1                           | 1                           | 1                           |
| R01_cb2445_c19/flp0/2598    | NA                          | NA                          | NA                          | R01_cb2445_c19/flp0/2598    |
| R01_cb8564_c80370/flp0/3493 | NA                          | R01_cb8564_c80370/flp0/3493 | R01_cb8564_c80370/flp0/3493 | NA                          |
| R01_cb1093_c1/flp0/4261     | NA                          | NA                          | NA                          | R01_cb1093_c1/flp0/4261     |
| R01_cb16177_c0/f6p0/860     | NA                          | NA                          | NA                          | R01_cb16177_c0/f6p0/860     |
| R01_cb8564_c73785/flp0/2184 | NA                          | R01_cb8564_c73785/flp0/2184 | R01_cb8564_c73785/flp0/2184 | R01_cb8564_c73785/flp0/2184 |
| R01_cb13433_c97/flp0/830    | R01_cb13433_c97/flp0/830    | R01_cb13433_c97/flp0/830    | R01_cb13433_c97/flp0/830    | R01_cb13433_c97/flp0/830    |
| R01_cb625_c15/flp0/3549     | R01_cb625_c15/flp0/3549     | R01_cb625_c15/flp0/3549     | R01_cb625_c15/flp0/3549     | R01_cb625_c15/flp0/3549     |
| R01_cb17432_c5/flp0/1768    | NA                          | R01_cb17432_c5/flp0/1768    | NA                          | NA                          |
| R01_cb9129_c1/flp0/2112     | NA                          | NA                          | NA                          | R01_cb9129_c1/flp0/2112     |
| R01_cb5339_c0/f3p0/2454     | NA                          | NA                          | NA                          | R01_cb5339_c0/f3p0/2454     |
| R01_cb2082_c8/f2p0/2508     | NA                          | NA                          | NA                          | R01_cb2082_c8/f2p0/2508     |
| R01_cb6286_c19/flp0/2614    | NA                          | NA                          | NA                          | R01_cb6286_c19/flp0/2614    |
| R01_cb16172_c1/flp0/1268    | R01_cb16172_c1/flp0/1268    | R01_cb16172_c1/flp0/1268    | R01_cb16172_c1/flp0/1268    | NA                          |
| R01_cb15352_c6/f7p2/759     | NA                          | NA                          | NA                          | R01_cb15352_c6/f7p2/759     |

|                             |                            |                             |                            |                             |
|-----------------------------|----------------------------|-----------------------------|----------------------------|-----------------------------|
| R01_cb18456_c4705/flp0/522  | NA                         | NA                          | NA                         | R01_cb18456_c4705/flp0/522  |
| R01_cb8564_c121942/flp0/272 | NA                         | R01_cb8564_c121942/flp0/272 | NA                         | R01_cb8564_c121942/flp0/272 |
| 4                           |                            | 4                           |                            | 4                           |
| R01_cb9960_c4/flp0/1841     | NA                         | NA                          | NA                         | R01_cb9960_c4/flp0/1841     |
| R01_cb10015_c330/flp0/590   | NA                         | R01_cb10015_c330/flp0/590   | R01_cb10015_c330/flp0/590  | NA                          |
| R01_cb7033_c2/flp0/2717     | NA                         | R01_cb7033_c2/flp0/2717     | NA                         | NA                          |
| R01_cb18456_c5889/flp0/446  | R01_cb18456_c5889/flp0/446 | R01_cb18456_c5889/flp0/446  | NA                         | R01_cb18456_c5889/flp0/446  |
| R01_cb17739_c1/flp0/430     | R01_cb17739_c1/flp0/430    | R01_cb17739_c1/flp0/430     | R01_cb17739_c1/flp0/430    | R01_cb17739_c1/flp0/430     |
| R01_cb1854_c5/flp0/4153     | NA                         | R01_cb1854_c5/flp0/4153     | NA                         | NA                          |
| R01_cb10948_c8/flp0/1369    | NA                         | NA                          | NA                         | R01_cb10948_c8/flp0/1369    |
| R01_cb6399_c3/f3p0/535      | R01_cb6399_c3/f3p0/535     | R01_cb6399_c3/f3p0/535      | NA                         | NA                          |
| R01_cb18409_c51/flp0/384    | R01_cb18409_c51/flp0/384   | R01_cb18409_c51/flp0/384    | R01_cb18409_c51/flp0/384   | R01_cb18409_c51/flp0/384    |
| R01_cb15186_c12/flp0/507    | NA                         | R01_cb15186_c12/flp0/507    | R01_cb15186_c12/flp0/507   | NA                          |
| R01_cb15118_c8/flp0/548     | R01_cb15118_c8/flp0/548    | NA                          | NA                         | R01_cb15118_c8/flp0/548     |
| R01_cb4824_c1/f2p0/2790     | NA                         | R01_cb4824_c1/f2p0/2790     | NA                         | R01_cb4824_c1/f2p0/2790     |
| R01_cb18456_c7445/flp0/968  | NA                         | R01_cb18456_c7445/flp0/968  | R01_cb18456_c7445/flp0/968 | R01_cb18456_c7445/flp0/968  |
| R01_cb5664_c2/flp0/2292     | NA                         | R01_cb5664_c2/flp0/2292     | R01_cb5664_c2/flp0/2292    | R01_cb5664_c2/flp0/2292     |
| R01_cb8501_c40/flp0/407     | R01_cb8501_c40/flp0/407    | R01_cb8501_c40/flp0/407     | R01_cb8501_c40/flp0/407    | R01_cb8501_c40/flp0/407     |
| R01_cb8564_c69028/f2p0/2446 | NA                         | R01_cb8564_c69028/f2p0/2446 | NA                         | NA                          |
| R01_cb4952_c4/flp0/1716     | NA                         | NA                          | NA                         | R01_cb4952_c4/flp0/1716     |
| R01_cb10230_c5/flp1/714     | NA                         | R01_cb10230_c5/flp1/714     | NA                         | NA                          |
| R01_cb13783_c5/flp0/309     | R01_cb13783_c5/flp0/309    | R01_cb13783_c5/flp0/309     | R01_cb13783_c5/flp0/309    | R01_cb13783_c5/flp0/309     |
| R01_cb8564_c48909/flp0/2687 | NA                         | NA                          | NA                         | R01_cb8564_c48909/flp0/2687 |
| R01_cb11929_c2/flp0/1841    | NA                         | R01_cb11929_c2/flp0/1841    | R01_cb11929_c2/flp0/1841   | R01_cb11929_c2/flp0/1841    |
| R01_cb8564_c1413/flp0/2505  | NA                         | R01_cb8564_c1413/flp0/2505  | NA                         | NA                          |
| R01_cb10771_c1/flp0/3003    | NA                         | NA                          | R01_cb10771_c1/flp0/3003   | R01_cb10771_c1/flp0/3003    |



|                              |                             |                              |                           |                              |
|------------------------------|-----------------------------|------------------------------|---------------------------|------------------------------|
| R01_cb7008_c32/flp0/2486     | NA                          | R01_cb7008_c32/flp0/2486     | NA                        | NA                           |
| R01_cb8564_c80900/flp1/2361  | NA                          | NA                           | NA                        | R01_cb8564_c80900/flp1/2361  |
| R01_cb13193_c2/f2p0/1555     | R01_cb13193_c2/f2p0/1555    | R01_cb13193_c2/f2p0/1555     | R01_cb13193_c2/f2p0/1555  | R01_cb13193_c2/f2p0/1555     |
| R01_cb11177_c1/flp0/3117     | NA                          | R01_cb11177_c1/flp0/3117     | NA                        | NA                           |
| R01_cb2104_c18/fl7p1/1424    | NA                          | NA                           | R01_cb2104_c18/fl7p1/1424 | R01_cb2104_c18/fl7p1/1424    |
| R01_cb9779_c1/flp0/2179      | NA                          | NA                           | NA                        | R01_cb9779_c1/flp0/2179      |
| R01_cb416_c13/flp0/4820      | NA                          | R01_cb416_c13/flp0/4820      | NA                        | R01_cb416_c13/flp0/4820      |
| R01_cb7564_c35/flp0/2473     | NA                          | R01_cb7564_c35/flp0/2473     | NA                        | NA                           |
| R01_cb12579_c5/flp0/936      | NA                          | R01_cb12579_c5/flp0/936      | R01_cb12579_c5/flp0/936   | R01_cb12579_c5/flp0/936      |
| R01_cb8564_c113524/flp0/1967 | NA                          | R01_cb8564_c113524/flp0/1967 | NA                        | R01_cb8564_c113524/flp0/1967 |
| R01_cb17266_c28/flp0/721     | R01_cb17266_c28/flp0/721    | R01_cb17266_c28/flp0/721     | R01_cb17266_c28/flp0/721  | R01_cb17266_c28/flp0/721     |
| R01_cb8809_c7/flp0/4039      | NA                          | R01_cb8809_c7/flp0/4039      | NA                        | R01_cb8809_c7/flp0/4039      |
| R01_cb1119_c6/flp0/2308      | NA                          | R01_cb1119_c6/flp0/2308      | NA                        | NA                           |
| R01_cb8564_c52637/flp0/2340  | NA                          | R01_cb8564_c52637/flp0/2340  | NA                        | R01_cb8564_c52637/flp0/2340  |
| R01_cb8564_c92323/flp0/3640  | NA                          | R01_cb8564_c92323/flp0/3640  | NA                        | NA                           |
| R01_cb18301_c33/flp0/304     | R01_cb18301_c33/flp0/304    | R01_cb18301_c33/flp0/304     | R01_cb18301_c33/flp0/304  | R01_cb18301_c33/flp0/304     |
| R01_cb13317_c3/flp0/1730     | R01_cb13317_c3/flp0/1730    | R01_cb13317_c3/flp0/1730     | NA                        | R01_cb13317_c3/flp0/1730     |
| R01_cb5902_c1/flp0/2259      | NA                          | R01_cb5902_c1/flp0/2259      | NA                        | NA                           |
| R01_cb11895_c3/flp0/5507     | NA                          | NA                           | NA                        | R01_cb11895_c3/flp0/5507     |
| R01_cb11633_c0/flp0/1899     | NA                          | R01_cb11633_c0/flp0/1899     | NA                        | NA                           |
| R01_cb8564_c77699/flp0/2085  | R01_cb8564_c77699/flp0/2085 | R01_cb8564_c77699/flp0/2085  | NA                        | R01_cb8564_c77699/flp0/2085  |
| R01_cb5952_c7/flp0/950       | NA                          | NA                           | NA                        | R01_cb5952_c7/flp0/950       |
| R01_cb18456_c4726/flp0/487   | NA                          | NA                           | NA                        | R01_cb18456_c4726/flp0/487   |
| R01_cb8564_c4556/flp0/3011   | NA                          | R01_cb8564_c4556/flp0/3011   | NA                        | NA                           |

|                              |                             |                             |                             |                              |
|------------------------------|-----------------------------|-----------------------------|-----------------------------|------------------------------|
| R01_cb8564_c86179/flp0/2927  | NA                          | R01_cb8564_c86179/flp0/2927 | NA                          | NA                           |
| R01_cb6513_c4/flp0/1892      | NA                          | NA                          | NA                          | R01_cb6513_c4/flp0/1892      |
| R01_cb8564_c74639/flp0/2310  | NA                          | R01_cb8564_c74639/flp0/2310 | R01_cb8564_c74639/flp0/2310 | R01_cb8564_c74639/flp0/2310  |
| R01_cb18197_c3/flp0/1143     | NA                          | R01_cb18197_c3/flp0/1143    | R01_cb18197_c3/flp0/1143    | R01_cb18197_c3/flp0/1143     |
| R01_cb3861_c2/flp0/2983      | NA                          | R01_cb3861_c2/flp0/2983     | NA                          | NA                           |
| R01_cb18135_c0/flp0/900      | NA                          | R01_cb18135_c0/flp0/900     | R01_cb18135_c0/flp0/900     | R01_cb18135_c0/flp0/900      |
| R01_cb8564_c126545/flp0/2581 | NA                          | NA                          | NA                          | R01_cb8564_c126545/flp0/2581 |
| R01_cb14575_c6/flp1/431      | R01_cb14575_c6/flp1/431     | R01_cb14575_c6/flp1/431     | NA                          | R01_cb14575_c6/flp1/431      |
| R01_cb4923_c11/flp0/2754     | NA                          | NA                          | NA                          | R01_cb4923_c11/flp0/2754     |
| R01_cb8564_c21834/flp0/3062  | R01_cb8564_c21834/flp0/3062 | R01_cb8564_c21834/flp0/3062 | R01_cb8564_c21834/flp0/3062 | R01_cb8564_c21834/flp0/3062  |
| R01_cb2710_c5/flp0/2884      | NA                          | NA                          | NA                          | R01_cb2710_c5/flp0/2884      |
| R01_cb1626_c17/flp0/3006     | NA                          | NA                          | NA                          | R01_cb1626_c17/flp0/3006     |
| R01_cb16335_c0/flp2/785      | NA                          | NA                          | NA                          | R01_cb16335_c0/flp2/785      |
| R01_cb8564_c40511/flp0/2548  | NA                          | NA                          | NA                          | R01_cb8564_c40511/flp0/2548  |
| R01_cb7017_c4/flp0/1330      | NA                          | R01_cb7017_c4/flp0/1330     | R01_cb7017_c4/flp0/1330     | R01_cb7017_c4/flp0/1330      |
| R01_cb13463_c8/flp0/1370     | NA                          | R01_cb13463_c8/flp0/1370    | NA                          | R01_cb13463_c8/flp0/1370     |
| R01_cb5775_c3/flp0/3003      | NA                          | R01_cb5775_c3/flp0/3003     | NA                          | NA                           |
| R01_cb5390_c1/f2p0/2938      | NA                          | R01_cb5390_c1/f2p0/2938     | NA                          | NA                           |
| R01_cb18172_c0/flp0/694      | NA                          | NA                          | NA                          | R01_cb18172_c0/flp0/694      |
| R01_cb17829_c0/f2p0/423      | R01_cb17829_c0/f2p0/423     | R01_cb17829_c0/f2p0/423     | R01_cb17829_c0/f2p0/423     | R01_cb17829_c0/f2p0/423      |
| R01_cb8078_c2/flp0/2364      | NA                          | R01_cb8078_c2/flp0/2364     | NA                          | R01_cb8078_c2/flp0/2364      |
| R01_cb10159_c3/flp0/1119     | NA                          | R01_cb10159_c3/flp0/1119    | NA                          | NA                           |
| R01_cb13439_c21/flp0/551     | NA                          | R01_cb13439_c21/flp0/551    | NA                          | NA                           |
| R01_cb454_c3/f4p0/2389       | NA                          | NA                          | NA                          | R01_cb454_c3/f4p0/2389       |

|                             |                          |                             |                            |                             |
|-----------------------------|--------------------------|-----------------------------|----------------------------|-----------------------------|
| R01_cb14947_c0/f2p1/522     | R01_cb14947_c0/f2p1/522  | R01_cb14947_c0/f2p1/522     | NA                         | R01_cb14947_c0/f2p1/522     |
| R01_cb18456_c7203/f1p0/731  | NA                       | R01_cb18456_c7203/f1p0/731  | R01_cb18456_c7203/f1p0/731 | R01_cb18456_c7203/f1p0/731  |
| R01_cb15911_c3/f1p0/1589    | NA                       | R01_cb15911_c3/f1p0/1589    | NA                         | R01_cb15911_c3/f1p0/1589    |
| R01_cb10029_c240/f1p0/433   | NA                       | R01_cb10029_c240/f1p0/433   | R01_cb10029_c240/f1p0/433  | R01_cb10029_c240/f1p0/433   |
| R01_cb13478_c5/f3p0/424     | NA                       | R01_cb13478_c5/f3p0/424     | R01_cb13478_c5/f3p0/424    | R01_cb13478_c5/f3p0/424     |
| R01_cb10958_c2/f1p0/3151    | R01_cb10958_c2/f1p0/3151 | R01_cb10958_c2/f1p0/3151    | NA                         | NA                          |
| R01_cb416_c12/f2p0/2821     | NA                       | R01_cb416_c12/f2p0/2821     | NA                         | NA                          |
| R01_cb8564_c84065/f1p0/3380 | NA                       | R01_cb8564_c84065/f1p0/3380 | NA                         | R01_cb8564_c84065/f1p0/3380 |
| R01_cb10818_c4/f1p0/596     | NA                       | R01_cb10818_c4/f1p0/596     | NA                         | R01_cb10818_c4/f1p0/596     |
| R01_cb10314_c5/f1p0/667     | NA                       | R01_cb10314_c5/f1p0/667     | NA                         | NA                          |
| R01_cb10378_c3/f1p0/442     | NA                       | R01_cb10378_c3/f1p0/442     | NA                         | R01_cb10378_c3/f1p0/442     |
| R01_cb18553_c0/f1p0/1296    | NA                       | NA                          | NA                         | R01_cb18553_c0/f1p0/1296    |
| R01_cb18511_c0/f1p0/478     | R01_cb18511_c0/f1p0/478  | R01_cb18511_c0/f1p0/478     | R01_cb18511_c0/f1p0/478    | R01_cb18511_c0/f1p0/478     |
| R01_cb2946_c6/f1p0/2232     | NA                       | NA                          | NA                         | R01_cb2946_c6/f1p0/2232     |
| R01_cb10010_c3/f1p0/1790    | NA                       | R01_cb10010_c3/f1p0/1790    | NA                         | R01_cb10010_c3/f1p0/1790    |
| R01_cb8564_c16650/f1p0/2552 | NA                       | R01_cb8564_c16650/f1p0/2552 | NA                         | NA                          |
| R01_cb11924_c24/f1p0/475    | R01_cb11924_c24/f1p0/475 | R01_cb11924_c24/f1p0/475    | R01_cb11924_c24/f1p0/475   | NA                          |
| R01_cb14477_c2/f1p0/980     | NA                       | NA                          | NA                         | R01_cb14477_c2/f1p0/980     |
| R01_cb2463_c4/f1p0/2906     | NA                       | NA                          | NA                         | R01_cb2463_c4/f1p0/2906     |
| R01_cb8973_c3/f1p0/526      | NA                       | R01_cb8973_c3/f1p0/526      | NA                         | NA                          |
| R01_cb7761_c26/f1p0/801     | R01_cb7761_c26/f1p0/801  | R01_cb7761_c26/f1p0/801     | R01_cb7761_c26/f1p0/801    | R01_cb7761_c26/f1p0/801     |
| R01_cb9853_c3/f1p0/741      | NA                       | NA                          | R01_cb9853_c3/f1p0/741     | R01_cb9853_c3/f1p0/741      |
| R01_cb12815_c2/f1p0/1648    | R01_cb12815_c2/f1p0/1648 | R01_cb12815_c2/f1p0/1648    | NA                         | NA                          |
| R01_cb3359_c35/f1p0/1632    | NA                       | R01_cb3359_c35/f1p0/1632    | NA                         | NA                          |
| R01_cb14993_c1/f1p0/929     | NA                       | R01_cb14993_c1/f1p0/929     | NA                         | R01_cb14993_c1/f1p0/929     |
| R01_cb16295_c2/f1p0/1524    | NA                       | NA                          | NA                         | R01_cb16295_c2/f1p0/1524    |

|                              |                           |                              |                              |                              |
|------------------------------|---------------------------|------------------------------|------------------------------|------------------------------|
| R01_cb5946_c17/flp1/890      | NA                        | NA                           | NA                           | R01_cb5946_c17/flp1/890      |
| R01_cb8564_c146532/f8p0/2639 | NA                        | NA                           | NA                           | R01_cb8564_c146532/f8p0/2639 |
| R01_cb15150_c0/f4p0/566      | NA                        | R01_cb15150_c0/f4p0/566      | NA                           | R01_cb15150_c0/f4p0/566      |
| R01_cb8564_c81199/flp0/3038  | NA                        | R01_cb8564_c81199/flp0/3038  | NA                           | NA                           |
| R01_cb5513_c6/flp0/2890      | NA                        | NA                           | NA                           | R01_cb5513_c6/flp0/2890      |
| R01_cb8564_c129756/flp0/2608 | NA                        | R01_cb8564_c129756/flp0/2608 | R01_cb8564_c129756/flp0/2608 | R01_cb8564_c129756/flp0/2608 |
| R01_cb795_c2/flp0/3065       | R01_cb795_c2/flp0/3065    | R01_cb795_c2/flp0/3065       | R01_cb795_c2/flp0/3065       | R01_cb795_c2/flp0/3065       |
| R01_cb15766_c1/flp0/1574     | NA                        | NA                           | NA                           | R01_cb15766_c1/flp0/1574     |
| R01_cb12498_c0/f2p0/1415     | NA                        | R01_cb12498_c0/f2p0/1415     | NA                           | NA                           |
| R01_cb12898_c2/flp1/758      | NA                        | R01_cb12898_c2/flp1/758      | NA                           | NA                           |
| R01_cb18044_c3/flp0/966      | R01_cb18044_c3/flp0/966   | R01_cb18044_c3/flp0/966      | R01_cb18044_c3/flp0/966      | R01_cb18044_c3/flp0/966      |
| R01_cb16334_c1/flp0/1310     | NA                        | R01_cb16334_c1/flp0/1310     | R01_cb16334_c1/flp0/1310     | R01_cb16334_c1/flp0/1310     |
| R01_cb1788_c2/flp0/3011      | NA                        | NA                           | NA                           | R01_cb1788_c2/flp0/3011      |
| R01_cb13558_c2/flp0/707      | NA                        | NA                           | R01_cb13558_c2/flp0/707      | R01_cb13558_c2/flp0/707      |
| R01_cb8564_c36799/flp0/4885  | NA                        | NA                           | NA                           | R01_cb8564_c36799/flp0/4885  |
| R01_cb17885_c20/flp0/1166    | R01_cb17885_c20/flp0/1166 | NA                           | NA                           | NA                           |
| R01_cb8281_c8/flp0/2274      | NA                        | NA                           | NA                           | R01_cb8281_c8/flp0/2274      |
| R01_cb8564_c115260/flp1/1895 | NA                        | R01_cb8564_c115260/flp1/1895 | NA                           | R01_cb8564_c115260/flp1/1895 |
| R01_cb15535_c11/flp1/392     | R01_cb15535_c11/flp1/392  | R01_cb15535_c11/flp1/392     | R01_cb15535_c11/flp1/392     | R01_cb15535_c11/flp1/392     |
| R01_cb124_c23/flp0/3623      | NA                        | NA                           | NA                           | R01_cb124_c23/flp0/3623      |
| R01_cb8564_c89541/flp0/2001  | NA                        | R01_cb8564_c89541/flp0/2001  | R01_cb8564_c89541/flp0/2001  | R01_cb8564_c89541/flp0/2001  |
| R01_cb6547_c4/f2p1/2736      | NA                        | NA                           | NA                           | R01_cb6547_c4/f2p1/2736      |
| R01_cb9663_c4/flp0/1762      | NA                        | R01_cb9663_c4/flp0/1762      | NA                           | NA                           |

|                             |                             |                             |                             |                             |
|-----------------------------|-----------------------------|-----------------------------|-----------------------------|-----------------------------|
| R01_cb3888_c4/flp0/3311     | NA                          | R01_cb3888_c4/flp0/3311     | NA                          | NA                          |
| R01_cb18456_c1860/flp0/1860 | NA                          | R01_cb18456_c1860/flp0/1860 | NA                          | R01_cb18456_c1860/flp0/1860 |
| R01_cb693_c3/flp0/3671      | NA                          | NA                          | NA                          | R01_cb693_c3/flp0/3671      |
| R01_cb5625_c2/flp0/3617     | NA                          | NA                          | NA                          | R01_cb5625_c2/flp0/3617     |
| R01_cb12421_c74/f9p5/702    | NA                          | R01_cb12421_c74/f9p5/702    | NA                          | NA                          |
| R01_cb9256_c1/flp0/2700     | NA                          | NA                          | NA                          | R01_cb9256_c1/flp0/2700     |
| R01_cb18422_c1/flp0/553     | NA                          | R01_cb18422_c1/flp0/553     | NA                          | NA                          |
| R01_cb10978_c1/flp0/2956    | NA                          | R01_cb10978_c1/flp0/2956    | NA                          | NA                          |
| R01_cb15932_c3/flp0/770     | NA                          | NA                          | NA                          | R01_cb15932_c3/flp0/770     |
| R01_cb647_c4/f3p0/3277      | NA                          | R01_cb647_c4/f3p0/3277      | R01_cb647_c4/f3p0/3277      | NA                          |
| R01_cb16127_c0/f2p0/540     | R01_cb16127_c0/f2p0/540     | R01_cb16127_c0/f2p0/540     | NA                          | R01_cb16127_c0/f2p0/540     |
| R01_cb3813_c4/flp0/1550     | NA                          | R01_cb3813_c4/flp0/1550     | NA                          | NA                          |
| R01_cb17577_c1/flp0/1564    | NA                          | NA                          | NA                          | R01_cb17577_c1/flp0/1564    |
| R01_cb12785_c29/f9p1/969    | NA                          | NA                          | R01_cb12785_c29/f9p1/969    | NA                          |
| R01_cb7693_c4/flp0/2666     | NA                          | R01_cb7693_c4/flp0/2666     | R01_cb7693_c4/flp0/2666     | R01_cb7693_c4/flp0/2666     |
| R01_cb16782_c3/flp0/611     | R01_cb16782_c3/flp0/611     | R01_cb16782_c3/flp0/611     | R01_cb16782_c3/flp0/611     | R01_cb16782_c3/flp0/611     |
| R01_cb11767_c1/flp0/2007    | R01_cb11767_c1/flp0/2007    | R01_cb11767_c1/flp0/2007    | R01_cb11767_c1/flp0/2007    | R01_cb11767_c1/flp0/2007    |
| R01_cb12480_c6/flp0/553     | R01_cb12480_c6/flp0/553     | R01_cb12480_c6/flp0/553     | R01_cb12480_c6/flp0/553     | R01_cb12480_c6/flp0/553     |
| R01_cb6615_c3/flp0/2809     | NA                          | NA                          | NA                          | R01_cb6615_c3/flp0/2809     |
| R01_cb2674_c7/flp0/2708     | NA                          | NA                          | NA                          | R01_cb2674_c7/flp0/2708     |
| R01_cb18456_c7625/flp1/798  | NA                          | R01_cb18456_c7625/flp1/798  | NA                          | R01_cb18456_c7625/flp1/798  |
| R01_cb8564_c85403/flp0/2182 | R01_cb8564_c85403/flp0/2182 | R01_cb8564_c85403/flp0/2182 | NA                          | NA                          |
| R01_cb15487_c1/flp0/389     | R01_cb15487_c1/flp0/389     | R01_cb15487_c1/flp0/389     | R01_cb15487_c1/flp0/389     | R01_cb15487_c1/flp0/389     |
| R01_cb8564_c68979/f2p1/2038 | NA                          | NA                          | R01_cb8564_c68979/f2p1/2038 | R01_cb8564_c68979/f2p1/2038 |
| R01_cb18192_c12/flp0/768    | R01_cb18192_c12/flp0/768    | R01_cb18192_c12/flp0/768    | R01_cb18192_c12/flp0/768    | NA                          |

|                             |                             |                             |                             |                             |
|-----------------------------|-----------------------------|-----------------------------|-----------------------------|-----------------------------|
| R01_cb17052_c6/flp0/1486    | NA                          | NA                          | NA                          | R01_cb17052_c6/flp0/1486    |
| R01_cb10019_c2/flp1/3311    | NA                          | R01_cb10019_c2/flp1/3311    | NA                          | NA                          |
| R01_cb3307_c44/flp0/1073    | NA                          | NA                          | NA                          | R01_cb3307_c44/flp0/1073    |
| R01_cb8564_c23850/flp0/3925 | NA                          | R01_cb8564_c23850/flp0/3925 | NA                          | NA                          |
| R01_cb13655_c1/flp0/924     | NA                          | R01_cb13655_c1/flp0/924     | NA                          | NA                          |
| R01_cb14308_c3/flp0/1223    | NA                          | R01_cb14308_c3/flp0/1223    | NA                          | NA                          |
| R01_cb14763_c1/flp0/1791    | NA                          | NA                          | NA                          | R01_cb14763_c1/flp0/1791    |
| R01_cb2970_c5/flp1/1749     | NA                          | R01_cb2970_c5/flp1/1749     | NA                          | NA                          |
| R01_cb1259_c4/flp0/4412     | NA                          | NA                          | NA                          | R01_cb1259_c4/flp0/4412     |
| R01_cb7368_c0/flp0/2617     | NA                          | R01_cb7368_c0/flp0/2617     | NA                          | R01_cb7368_c0/flp0/2617     |
| R01_cb5000_c14/flp0/2767    | NA                          | NA                          | NA                          | R01_cb5000_c14/flp0/2767    |
| R01_cb18409_c38/flp0/416    | R01_cb18409_c38/flp0/416    | R01_cb18409_c38/flp0/416    | R01_cb18409_c38/flp0/416    | R01_cb18409_c38/flp0/416    |
| R01_cb8564_c90445/flp0/2792 | R01_cb8564_c90445/flp0/2792 | R01_cb8564_c90445/flp0/2792 | NA                          | R01_cb8564_c90445/flp0/2792 |
| R01_cb16769_c1/flp0/1432    | R01_cb16769_c1/flp0/1432    | R01_cb16769_c1/flp0/1432    | R01_cb16769_c1/flp0/1432    | R01_cb16769_c1/flp0/1432    |
| R01_cb2238_c40/flp0/2390    | NA                          | NA                          | NA                          | R01_cb2238_c40/flp0/2390    |
| R01_cb8564_c71261/flp2/2275 | NA                          | R01_cb8564_c71261/flp2/2275 | R01_cb8564_c71261/flp2/2275 | R01_cb8564_c71261/flp2/2275 |
| R01_cb15435_c0/flp0/1831    | NA                          | R01_cb15435_c0/flp0/1831    | NA                          | NA                          |
| R01_cb18456_c1859/flp0/1467 | NA                          | R01_cb18456_c1859/flp0/1467 | NA                          | NA                          |
| R01_cb13820_c5/flp0/999     | NA                          | R01_cb13820_c5/flp0/999     | NA                          | NA                          |
| R01_cb4531_c5/flp0/2282     | NA                          | NA                          | NA                          | R01_cb4531_c5/flp0/2282     |
| R01_cb15273_c4/flp0/974     | NA                          | NA                          | R01_cb15273_c4/flp0/974     | NA                          |
| R01_cb4679_c0/f2p0/3167     | NA                          | R01_cb4679_c0/f2p0/3167     | NA                          | NA                          |
| R01_cb10644_c3/flp0/5384    | NA                          | R01_cb10644_c3/flp0/5384    | NA                          | NA                          |
| R01_cb8564_c124784/flp0/199 | NA                          | R01_cb8564_c124784/flp0/199 | NA                          | NA                          |
| 6                           |                             | 6                           |                             |                             |

|                              |                              |                              |                              |                              |
|------------------------------|------------------------------|------------------------------|------------------------------|------------------------------|
| R01_cb18456_c6568/f1p0/548   | NA                           | NA                           | NA                           | R01_cb18456_c6568/f1p0/548   |
| R01_cb9771_c1/f1p1/2599      | NA                           | NA                           | NA                           | R01_cb9771_c1/f1p1/2599      |
| R01_cb13545_c19/f1p0/743     | R01_cb13545_c19/f1p0/743     | R01_cb13545_c19/f1p0/743     | R01_cb13545_c19/f1p0/743     | R01_cb13545_c19/f1p0/743     |
| R01_cb17560_c1/f1p0/618      | R01_cb17560_c1/f1p0/618      | NA                           | NA                           | R01_cb17560_c1/f1p0/618      |
| R01_cb1894_c9/f1p0/1465      | NA                           | NA                           | NA                           | R01_cb1894_c9/f1p0/1465      |
| R01_cb17850_c0/f2p0/1308     | NA                           | R01_cb17850_c0/f2p0/1308     | R01_cb17850_c0/f2p0/1308     | R01_cb17850_c0/f2p0/1308     |
| R01_cb5159_c15/f1p0/1954     | NA                           | NA                           | NA                           | R01_cb5159_c15/f1p0/1954     |
| R01_cb293_c2/f1p1/4354       | NA                           | NA                           | NA                           | R01_cb293_c2/f1p1/4354       |
| R01_cb8564_c21068/f1p0/3700  | NA                           | R01_cb8564_c21068/f1p0/3700  | NA                           | NA                           |
| R01_cb1612_c15/f2p3/3007     | NA                           | NA                           | NA                           | R01_cb1612_c15/f2p3/3007     |
| R01_cb10687_c2/f2p1/1715     | NA                           | NA                           | NA                           | R01_cb10687_c2/f2p1/1715     |
| R01_cb10015_c593/f4p0/567    | R01_cb10015_c593/f4p0/567    | R01_cb10015_c593/f4p0/567    | R01_cb10015_c593/f4p0/567    | NA                           |
| R01_cb9472_c1/f1p0/2121      | NA                           | NA                           | NA                           | R01_cb9472_c1/f1p0/2121      |
| R01_cb8564_c118304/f1p0/2654 | NA                           | R01_cb8564_c118304/f1p0/2654 | NA                           | R01_cb8564_c118304/f1p0/2654 |
| R01_cb9915_c2/f1p0/1798      | NA                           | NA                           | NA                           | R01_cb9915_c2/f1p0/1798      |
| R01_cb6879_c5/f1p0/2258      | NA                           | NA                           | NA                           | R01_cb6879_c5/f1p0/2258      |
| R01_cb5911_c3/f1p0/3105      | NA                           | NA                           | NA                           | R01_cb5911_c3/f1p0/3105      |
| R01_cb8887_c3/f1p0/2242      | NA                           | R01_cb8887_c3/f1p0/2242      | NA                           | R01_cb8887_c3/f1p0/2242      |
| R01_cb9594_c5/f1p0/2037      | R01_cb9594_c5/f1p0/2037      | R01_cb9594_c5/f1p0/2037      | NA                           | NA                           |
| R01_cb3145_c1/f1p0/3709      | NA                           | R01_cb3145_c1/f1p0/3709      | NA                           | NA                           |
| R01_cb1225_c1/f1p0/2000      | NA                           | R01_cb1225_c1/f1p0/2000      | NA                           | NA                           |
| R01_cb8564_c2627/f1p0/2600   | R01_cb8564_c2627/f1p0/2600   | R01_cb8564_c2627/f1p0/2600   | NA                           | R01_cb8564_c2627/f1p0/2600   |
| R01_cb10080_c5/f1p0/2509     | R01_cb10080_c5/f1p0/2509     | R01_cb10080_c5/f1p0/2509     | NA                           | NA                           |
| R01_cb8564_c115744/f1p0/2647 | R01_cb8564_c115744/f1p0/2647 | R01_cb8564_c115744/f1p0/2647 | R01_cb8564_c115744/f1p0/2647 | R01_cb8564_c115744/f1p0/2647 |

|                             |                            |                             |                            |                             |
|-----------------------------|----------------------------|-----------------------------|----------------------------|-----------------------------|
| R01_cb18456_c2511/flp0/347  | R01_cb18456_c2511/flp0/347 | R01_cb18456_c2511/flp0/347  | R01_cb18456_c2511/flp0/347 | R01_cb18456_c2511/flp0/347  |
| R01_cb8564_c19624/flp0/2697 | NA                         | R01_cb8564_c19624/flp0/2697 | NA                         | NA                          |
| R01_cb3716_c16/flp0/2300    | NA                         | NA                          | NA                         | R01_cb3716_c16/flp0/2300    |
| R01_cb1626_c7/flp1/2840     | NA                         | NA                          | NA                         | R01_cb1626_c7/flp1/2840     |
| R01_cb15176_c3/flp0/1043    | R01_cb15176_c3/flp0/1043   | R01_cb15176_c3/flp0/1043    | NA                         | NA                          |
| R01_cb7342_c3/flp0/2044     | NA                         | NA                          | NA                         | R01_cb7342_c3/flp0/2044     |
| R01_cb8305_c6/flp0/2221     | NA                         | R01_cb8305_c6/flp0/2221     | NA                         | NA                          |
| R01_cb7219_c16/f3p2/2487    | NA                         | NA                          | NA                         | R01_cb7219_c16/f3p2/2487    |
| R01_cb5547_c2/flp0/2129     | NA                         | NA                          | NA                         | R01_cb5547_c2/flp0/2129     |
| R01_cb12152_c1/f3p0/709     | NA                         | NA                          | R01_cb12152_c1/f3p0/709    | R01_cb12152_c1/f3p0/709     |
| R01_cb5683_c4/flp0/2487     | NA                         | R01_cb5683_c4/flp0/2487     | NA                         | NA                          |
| R01_cb17973_c36/flp0/1061   | NA                         | R01_cb17973_c36/flp0/1061   | R01_cb17973_c36/flp0/1061  | R01_cb17973_c36/flp0/1061   |
| R01_cb8564_c76611/flp0/2650 | NA                         | NA                          | NA                         | R01_cb8564_c76611/flp0/2650 |
| R01_cb18335_c1/flp0/1654    | R01_cb18335_c1/flp0/1654   | R01_cb18335_c1/flp0/1654    | R01_cb18335_c1/flp0/1654   | R01_cb18335_c1/flp0/1654    |
| R01_cb18409_c113/flp0/664   | NA                         | R01_cb18409_c113/flp0/664   | R01_cb18409_c113/flp0/664  | R01_cb18409_c113/flp0/664   |
| R01_cb18265_c0/flp0/682     | NA                         | NA                          | NA                         | R01_cb18265_c0/flp0/682     |
| R01_cb10029_c426/flp0/614   | NA                         | R01_cb10029_c426/flp0/614   | R01_cb10029_c426/flp0/614  | R01_cb10029_c426/flp0/614   |
| R01_cb625_c17/flp0/1040     | R01_cb625_c17/flp0/1040    | R01_cb625_c17/flp0/1040     | R01_cb625_c17/flp0/1040    | R01_cb625_c17/flp0/1040     |
| R01_cb17575_c1/flp0/777     | NA                         | NA                          | NA                         | R01_cb17575_c1/flp0/777     |
| R01_cb12003_c32/flp0/1862   | NA                         | R01_cb12003_c32/flp0/1862   | NA                         | NA                          |
| R01_cb12120_c1/flp0/1642    | NA                         | R01_cb12120_c1/flp0/1642    | NA                         | NA                          |
| R01_cb16066_c4/flp0/509     | R01_cb16066_c4/flp0/509    | R01_cb16066_c4/flp0/509     | R01_cb16066_c4/flp0/509    | R01_cb16066_c4/flp0/509     |
| R01_cb3859_c2/flp0/1982     | NA                         | NA                          | NA                         | R01_cb3859_c2/flp0/1982     |
| R01_cb7506_c3/flp0/2275     | NA                         | NA                          | NA                         | R01_cb7506_c3/flp0/2275     |
| R01_cb18637_c1/flp0/731     | R01_cb18637_c1/flp0/731    | R01_cb18637_c1/flp0/731     | R01_cb18637_c1/flp0/731    | R01_cb18637_c1/flp0/731     |
| R01_cb4555_c2/flp0/3510     | NA                         | R01_cb4555_c2/flp0/3510     | NA                         | R01_cb4555_c2/flp0/3510     |



|                               |                             |                              |                             |                               |
|-------------------------------|-----------------------------|------------------------------|-----------------------------|-------------------------------|
| R01_cb12641_c8/f3p0/979       | NA                          | NA                           | NA                          | R01_cb12641_c8/f3p0/979       |
| R01_cb1438_c3/f3p3/4154       | NA                          | NA                           | NA                          | R01_cb1438_c3/f3p3/4154       |
| R01_cb12469_c11/f1p0/527      | NA                          | R01_cb12469_c11/f1p0/527     | NA                          | NA                            |
| R01_cb6069_c3/f1p0/2911       | NA                          | NA                           | NA                          | R01_cb6069_c3/f1p0/2911       |
| R01_cb3564_c8/f1p0/3644       | NA                          | NA                           | NA                          | R01_cb3564_c8/f1p0/3644       |
| R01_cb5090_c11/f1p0/2102      | NA                          | R01_cb5090_c11/f1p0/2102     | NA                          | NA                            |
| R01_cb6204_c0/f24p2/2501      | NA                          | NA                           | NA                          | R01_cb6204_c0/f24p2/2501      |
| R01_cb3247_c1/f1p0/2062       | NA                          | NA                           | NA                          | R01_cb3247_c1/f1p0/2062       |
| R01_cb8564_c10041/f6p0/3368   | NA                          | R01_cb8564_c10041/f6p0/3368  | NA                          | NA                            |
| R01_cb8564_c91906/f1p0/3084   | R01_cb8564_c91906/f1p0/3084 | R01_cb8564_c91906/f1p0/3084  | R01_cb8564_c91906/f1p0/3084 | R01_cb8564_c91906/f1p0/3084   |
| R01_cb6867_c5/f1p0/817        | NA                          | R01_cb6867_c5/f1p0/817       | NA                          | R01_cb6867_c5/f1p0/817        |
| R01_cb12600_c1/f1p0/780       | R01_cb12600_c1/f1p0/780     | NA                           | NA                          | R01_cb12600_c1/f1p0/780       |
| R01_cb16935_c1/f1p0/1650      | NA                          | NA                           | R01_cb16935_c1/f1p0/1650    | R01_cb16935_c1/f1p0/1650      |
| R01_cb18365_c1/f1p0/1154      | NA                          | R01_cb18365_c1/f1p0/1154     | R01_cb18365_c1/f1p0/1154    | R01_cb18365_c1/f1p0/1154      |
| R01_cb3074_c0/f1p0/3702       | NA                          | NA                           | NA                          | R01_cb3074_c0/f1p0/3702       |
| R01_cb8785_c2/f1p0/2198       | NA                          | NA                           | NA                          | R01_cb8785_c2/f1p0/2198       |
| R01_cb8564_c116490/f1p0/2832  | NA                          | R01_cb8564_c116490/f1p0/2832 | NA                          | NA                            |
| R01_cb13490_c9/f1p0/804       | R01_cb13490_c9/f1p0/804     | R01_cb13490_c9/f1p0/804      | R01_cb13490_c9/f1p0/804     | R01_cb13490_c9/f1p0/804       |
| R01_cb1333_c39/f1p0/3450      | R01_cb1333_c39/f1p0/3450    | R01_cb1333_c39/f1p0/3450     | R01_cb1333_c39/f1p0/3450    | R01_cb1333_c39/f1p0/3450      |
| R01_cb8564_c83177/f1p0/2084   | NA                          | R01_cb8564_c83177/f1p0/2084  | NA                          | R01_cb8564_c83177/f1p0/2084   |
| R01_cb8564_c146112/f14p3/2729 | NA                          | NA                           | NA                          | R01_cb8564_c146112/f14p3/2729 |
| R01_cb5758_c4/f1p0/1141       | NA                          | R01_cb5758_c4/f1p0/1141      | R01_cb5758_c4/f1p0/1141     | R01_cb5758_c4/f1p0/1141       |
| R01_cb13497_c4/f2p1/944       | NA                          | NA                           | NA                          | R01_cb13497_c4/f2p1/944       |

|                              |                          |                              |                              |                              |
|------------------------------|--------------------------|------------------------------|------------------------------|------------------------------|
| R01_cb15116_c2/f6p0/976      | NA                       | NA                           | NA                           | R01_cb15116_c2/f6p0/976      |
| R01_cb5697_c4/flp1/3696      | NA                       | R01_cb5697_c4/flp1/3696      | NA                           | R01_cb5697_c4/flp1/3696      |
| R01_cb8564_c10712/flp0/2394  | NA                       | R01_cb8564_c10712/flp0/2394  | R01_cb8564_c10712/flp0/2394  | R01_cb8564_c10712/flp0/2394  |
| R01_cb8564_c110438/flp0/2116 | NA                       | R01_cb8564_c110438/flp0/2116 | R01_cb8564_c110438/flp0/2116 | R01_cb8564_c110438/flp0/2116 |
| R01_cb4375_c5/flp0/3262      | NA                       | R01_cb4375_c5/flp0/3262      | NA                           | NA                           |
| R01_cb8564_c79130/flp0/1904  | NA                       | R01_cb8564_c79130/flp0/1904  | NA                           | NA                           |
| R01_cb8564_c88383/flp0/1935  | NA                       | NA                           | NA                           | R01_cb8564_c88383/flp0/1935  |
| R01_cb14977_c6/flp0/1715     | R01_cb14977_c6/flp0/1715 | R01_cb14977_c6/flp0/1715     | R01_cb14977_c6/flp0/1715     | R01_cb14977_c6/flp0/1715     |
| R01_cb18409_c43/flp0/1577    | NA                       | R01_cb18409_c43/flp0/1577    | R01_cb18409_c43/flp0/1577    | R01_cb18409_c43/flp0/1577    |
| R01_cb16535_c0/flp0/770      | NA                       | R01_cb16535_c0/flp0/770      | NA                           | R01_cb16535_c0/flp0/770      |
| R01_cb9898_c1/flp0/1925      | NA                       | R01_cb9898_c1/flp0/1925      | NA                           | NA                           |
| R01_cb10468_c3/flp2/1245     | R01_cb10468_c3/flp2/1245 | R01_cb10468_c3/flp2/1245     | NA                           | R01_cb10468_c3/flp2/1245     |
| R01_cb14982_c1/f2p0/633      | NA                       | R01_cb14982_c1/f2p0/633      | R01_cb14982_c1/f2p0/633      | R01_cb14982_c1/f2p0/633      |
| R01_cb960_c1/flp0/4546       | NA                       | R01_cb960_c1/flp0/4546       | NA                           | NA                           |
| R01_cb14301_c2/flp0/558      | NA                       | R01_cb14301_c2/flp0/558      | NA                           | NA                           |
| R01_cb6141_c6/flp0/512       | R01_cb6141_c6/flp0/512   | R01_cb6141_c6/flp0/512       | R01_cb6141_c6/flp0/512       | R01_cb6141_c6/flp0/512       |
| R01_cb8564_c130081/flp0/3189 | NA                       | R01_cb8564_c130081/flp0/3189 | R01_cb8564_c130081/flp0/3189 | NA                           |
| R01_cb8564_c122639/flp0/2418 | NA                       | R01_cb8564_c122639/flp0/2418 | NA                           | R01_cb8564_c122639/flp0/2418 |
| R01_cb10015_c589/flp0/554    | NA                       | R01_cb10015_c589/flp0/554    | NA                           | NA                           |
| R01_cb4233_c179/flp0/3264    | NA                       | R01_cb4233_c179/flp0/3264    | NA                           | NA                           |
| R01_cb2844_c6/flp0/2159      | NA                       | NA                           | NA                           | R01_cb2844_c6/flp0/2159      |
| R01_cb18456_c7491/flp0/1798  | NA                       | R01_cb18456_c7491/flp0/1798  | NA                           | R01_cb18456_c7491/flp0/1798  |
| R01_cb6976_c2/flp0/1874      | NA                       | R01_cb6976_c2/flp0/1874      | NA                           | NA                           |

|                               |                            |                               |                               |                               |
|-------------------------------|----------------------------|-------------------------------|-------------------------------|-------------------------------|
| R01_cb13392_c11/flp0/699      | NA                         | R01_cb13392_c11/flp0/699      | NA                            | NA                            |
| R01_cb8564_c110692/flp0/1943  | NA                         | R01_cb8564_c110692/flp0/1943  | NA                            | NA                            |
| R01_cb2959_c8/flp0/3480       | NA                         | NA                            | NA                            | R01_cb2959_c8/flp0/3480       |
| R01_cb7254_c3/f2p0/2654       | NA                         | NA                            | NA                            | R01_cb7254_c3/f2p0/2654       |
| R01_cb8564_c39718/flp0/2899   | NA                         | NA                            | R01_cb8564_c39718/flp0/2899   | NA                            |
| R01_cb18456_c7538/flp0/604    | R01_cb18456_c7538/flp0/604 | R01_cb18456_c7538/flp0/604    | R01_cb18456_c7538/flp0/604    | R01_cb18456_c7538/flp0/604    |
| R01_cb2568_c5/flp0/3253       | NA                         | R01_cb2568_c5/flp0/3253       | R01_cb2568_c5/flp0/3253       | R01_cb2568_c5/flp0/3253       |
| R01_cb5042_c8/flp0/1108       | NA                         | NA                            | R01_cb5042_c8/flp0/1108       | NA                            |
| R01_cb16125_c19/flp0/1653     | NA                         | R01_cb16125_c19/flp0/1653     | R01_cb16125_c19/flp0/1653     | R01_cb16125_c19/flp0/1653     |
| R01_cb500_c82/flp0/1399       | NA                         | R01_cb500_c82/flp0/1399       | NA                            | NA                            |
| R01_cb2946_c1/flp0/3592       | NA                         | NA                            | NA                            | R01_cb2946_c1/flp0/3592       |
| R01_cb2160_c13/flp0/3048      | NA                         | NA                            | NA                            | R01_cb2160_c13/flp0/3048      |
| R01_cb16104_c0/f4p1/645       | NA                         | R01_cb16104_c0/f4p1/645       | R01_cb16104_c0/f4p1/645       | R01_cb16104_c0/f4p1/645       |
| R01_cb18192_c14/flp0/573      | NA                         | NA                            | R01_cb18192_c14/flp0/573      | NA                            |
| R01_cb666_c1/flp0/4314        | NA                         | R01_cb666_c1/flp0/4314        | NA                            | NA                            |
| R01_cb7087_c0/flp0/2707       | NA                         | NA                            | NA                            | R01_cb7087_c0/flp0/2707       |
| R01_cb17255_c2/flp0/791       | NA                         | R01_cb17255_c2/flp0/791       | NA                            | NA                            |
| R01_cb15034_c2/flp0/1493      | NA                         | R01_cb15034_c2/flp0/1493      | NA                            | R01_cb15034_c2/flp0/1493      |
| R01_cb18526_c2/flp0/532       | R01_cb18526_c2/flp0/532    | R01_cb18526_c2/flp0/532       | R01_cb18526_c2/flp0/532       | R01_cb18526_c2/flp0/532       |
| R01_cb8564_c110436/flp0/2513  | NA                         | R01_cb8564_c110436/flp0/2513  | NA                            | NA                            |
| R01_cb8564_c146231/fl2p0/2444 | NA                         | R01_cb8564_c146231/fl2p0/2444 | R01_cb8564_c146231/fl2p0/2444 | R01_cb8564_c146231/fl2p0/2444 |
| R01_cb12739_c3/flp0/489       | R01_cb12739_c3/flp0/489    | R01_cb12739_c3/flp0/489       | R01_cb12739_c3/flp0/489       | R01_cb12739_c3/flp0/489       |
| R01_cb14223_c1/f4p0/469       | R01_cb14223_c1/f4p0/469    | R01_cb14223_c1/f4p0/469       | R01_cb14223_c1/f4p0/469       | R01_cb14223_c1/f4p0/469       |

|                                  |                          |                                  |                             |                             |
|----------------------------------|--------------------------|----------------------------------|-----------------------------|-----------------------------|
| R01_cb10300_c1/flp0/1859         | NA                       | R01_cb10300_c1/flp0/1859         | NA                          | R01_cb10300_c1/flp0/1859    |
| R01_cb6982_c1/flp0/2694          | NA                       | R01_cb6982_c1/flp0/2694          | NA                          | R01_cb6982_c1/flp0/2694     |
| R01_cb8376_c1/flp0/2386          | R01_cb8376_c1/flp0/2386  | R01_cb8376_c1/flp0/2386          | R01_cb8376_c1/flp0/2386     | R01_cb8376_c1/flp0/2386     |
| R01_cb17607_c1/flp0/1249         | NA                       | NA                               | NA                          | R01_cb17607_c1/flp0/1249    |
| R01_cb8564_c35586/flp1/1997      | NA                       | R01_cb8564_c35586/flp1/1997      | NA                          | NA                          |
| R01_cb13834_c3/flp0/1663         | R01_cb13834_c3/flp0/1663 | R01_cb13834_c3/flp0/1663         | NA                          | NA                          |
| R01_cb15245_c0/flp0/1270         | NA                       | R01_cb15245_c0/flp0/1270         | NA                          | NA                          |
| R01_cb8564_c89898/flp0/3616      | NA                       | R01_cb8564_c89898/flp0/3616      | NA                          | NA                          |
| R01_cb7649_c10/flp0/2271         | NA                       | NA                               | NA                          | R01_cb7649_c10/flp0/2271    |
| R01_cb8564_c114048/flp0/457<br>4 | NA                       | R01_cb8564_c114048/flp0/457<br>4 | NA                          | NA                          |
| R01_cb8564_c11339/f4p6/4947      | NA                       | R01_cb8564_c11339/f4p6/4947      | R01_cb8564_c11339/f4p6/4947 | R01_cb8564_c11339/f4p6/4947 |
| R01_cb10689_c2/flp0/1433         | NA                       | NA                               | NA                          | R01_cb10689_c2/flp0/1433    |
| R01_cb10728_c2/flp1/1257         | NA                       | R01_cb10728_c2/flp1/1257         | R01_cb10728_c2/flp1/1257    | NA                          |
| R01_cb438_c6/flp0/3240           | NA                       | R01_cb438_c6/flp0/3240           | NA                          | R01_cb438_c6/flp0/3240      |
| R01_cb18372_c11/flp0/4185        | NA                       | R01_cb18372_c11/flp0/4185        | NA                          | NA                          |
| R01_cb16678_c5/flp0/935          | NA                       | R01_cb16678_c5/flp0/935          | R01_cb16678_c5/flp0/935     | R01_cb16678_c5/flp0/935     |
| R01_cb3563_c4/flp0/2024          | NA                       | NA                               | NA                          | R01_cb3563_c4/flp0/2024     |
| R01_cb5850_c2/flp0/668           | R01_cb5850_c2/flp0/668   | R01_cb5850_c2/flp0/668           | R01_cb5850_c2/flp0/668      | R01_cb5850_c2/flp0/668      |
| R01_cb17756_c6/f2p0/360          | R01_cb17756_c6/f2p0/360  | R01_cb17756_c6/f2p0/360          | R01_cb17756_c6/f2p0/360     | R01_cb17756_c6/f2p0/360     |
| R01_cb10024_c251/flp7/878        | NA                       | R01_cb10024_c251/flp7/878        | NA                          | NA                          |
| R01_cb8023_c3/flp0/2442          | NA                       | NA                               | R01_cb8023_c3/flp0/2442     | R01_cb8023_c3/flp0/2442     |
| R01_cb15060_c1/flp0/1073         | NA                       | NA                               | NA                          | R01_cb15060_c1/flp0/1073    |
| R01_cb18407_c1/flp0/1186         | NA                       | NA                               | NA                          | R01_cb18407_c1/flp0/1186    |
| R01_cb15929_c1/flp0/1088         | NA                       | R01_cb15929_c1/flp0/1088         | NA                          | R01_cb15929_c1/flp0/1088    |
| R01_cb18456_c7306/flp1/649       | NA                       | R01_cb18456_c7306/flp1/649       | NA                          | NA                          |

|                             |                          |                          |                          |                             |
|-----------------------------|--------------------------|--------------------------|--------------------------|-----------------------------|
| R01_cb8564_c10056/f2p0/2254 | NA                       | NA                       | NA                       | R01_cb8564_c10056/f2p0/2254 |
| R01_cb16166_c6/flp0/532     | R01_cb16166_c6/flp0/532  | R01_cb16166_c6/flp0/532  | R01_cb16166_c6/flp0/532  | R01_cb16166_c6/flp0/532     |
| R01_cb4637_c6/flp0/747      | R01_cb4637_c6/flp0/747   | NA                       | NA                       | NA                          |
| R01_cb8611_c3/flp0/2091     | NA                       | NA                       | NA                       | R01_cb8611_c3/flp0/2091     |
| R01_cb14444_c3/flp0/1119    | NA                       | R01_cb14444_c3/flp0/1119 | R01_cb14444_c3/flp0/1119 | R01_cb14444_c3/flp0/1119    |
| R01_cb6863_c0/flp0/2750     | R01_cb6863_c0/flp0/2750  | R01_cb6863_c0/flp0/2750  | R01_cb6863_c0/flp0/2750  | R01_cb6863_c0/flp0/2750     |
| R01_cb1905_c34/flp0/2216    | NA                       | R01_cb1905_c34/flp0/2216 | R01_cb1905_c34/flp0/2216 | NA                          |
| R01_cb8779_c10/flp0/4827    | NA                       | NA                       | NA                       | R01_cb8779_c10/flp0/4827    |
| R01_cb13954_c1/flp0/673     | NA                       | R01_cb13954_c1/flp0/673  | NA                       | NA                          |
| R01_cb9359_c2/flp0/1540     | NA                       | NA                       | NA                       | R01_cb9359_c2/flp0/1540     |
| R01_cb13832_c5/flp0/980     | NA                       | R01_cb13832_c5/flp0/980  | NA                       | NA                          |
| R01_cb12556_c4/flp0/421     | NA                       | R01_cb12556_c4/flp0/421  | NA                       | R01_cb12556_c4/flp0/421     |
| R01_cb3415_c1/flp2/3524     | NA                       | R01_cb3415_c1/flp2/3524  | NA                       | NA                          |
| R01_cb8380_c3/flp0/2054     | NA                       | R01_cb8380_c3/flp0/2054  | NA                       | NA                          |
| R01_cb16669_c1/flp0/677     | R01_cb16669_c1/flp0/677  | R01_cb16669_c1/flp0/677  | R01_cb16669_c1/flp0/677  | R01_cb16669_c1/flp0/677     |
| R01_cb8019_c7/flp1/1708     | NA                       | NA                       | NA                       | R01_cb8019_c7/flp1/1708     |
| R01_cb15701_c4/flp0/1743    | R01_cb15701_c4/flp0/1743 | R01_cb15701_c4/flp0/1743 | NA                       | NA                          |
| R01_cb13505_c7/flp0/603     | R01_cb13505_c7/flp0/603  | R01_cb13505_c7/flp0/603  | NA                       | NA                          |
| R01_cb16960_c2/flp0/673     | NA                       | R01_cb16960_c2/flp0/673  | NA                       | R01_cb16960_c2/flp0/673     |
| R01_cb3750_c17/flp0/2207    | NA                       | NA                       | NA                       | R01_cb3750_c17/flp0/2207    |
| R01_cb18455_c0/flp0/803     | R01_cb18455_c0/flp0/803  | R01_cb18455_c0/flp0/803  | R01_cb18455_c0/flp0/803  | R01_cb18455_c0/flp0/803     |
| R01_cb18321_c1/flp1/334     | R01_cb18321_c1/flp1/334  | R01_cb18321_c1/flp1/334  | R01_cb18321_c1/flp1/334  | R01_cb18321_c1/flp1/334     |
| R01_cb507_c2/flp0/2884      | NA                       | R01_cb507_c2/flp0/2884   | NA                       | R01_cb507_c2/flp0/2884      |
| R01_cb2851_c0/flp0/3790     | NA                       | R01_cb2851_c0/flp0/3790  | NA                       | NA                          |
| R01_cb13384_c3/f2p0/1063    | NA                       | NA                       | NA                       | R01_cb13384_c3/f2p0/1063    |
| R01_cb17_c21/flp0/6823      | NA                       | NA                       | NA                       | R01_cb17_c21/flp0/6823      |

|                              |                         |                              |                         |                             |
|------------------------------|-------------------------|------------------------------|-------------------------|-----------------------------|
| R01_cb3492_c5/flp0/725       | NA                      | NA                           | NA                      | R01_cb3492_c5/flp0/725      |
| R01_cb11150_c2/flp0/2464     | NA                      | R01_cb11150_c2/flp0/2464     | NA                      | NA                          |
| R01_cb17637_c1/flp0/617      | NA                      | R01_cb17637_c1/flp0/617      | NA                      | NA                          |
| R01_cb18545_c1/flp0/522      | R01_cb18545_c1/flp0/522 | R01_cb18545_c1/flp0/522      | R01_cb18545_c1/flp0/522 | R01_cb18545_c1/flp0/522     |
| R01_cb8249_c3/flp0/2375      | NA                      | R01_cb8249_c3/flp0/2375      | NA                      | NA                          |
| R01_cb10701_c4/flp0/413      | R01_cb10701_c4/flp0/413 | R01_cb10701_c4/flp0/413      | NA                      | NA                          |
| R01_cb18456_c6266/flp0/1395  | NA                      | NA                           | NA                      | R01_cb18456_c6266/flp0/1395 |
| R01_cb13980_c1/flp0/1511     | NA                      | NA                           | NA                      | R01_cb13980_c1/flp0/1511    |
| R01_cb16831_c0/f3p0/678      | NA                      | NA                           | NA                      | R01_cb16831_c0/f3p0/678     |
| R01_cb3162_c1/flp0/3706      | NA                      | R01_cb3162_c1/flp0/3706      | NA                      | R01_cb3162_c1/flp0/3706     |
| R01_cb17637_c2/flp0/568      | NA                      | R01_cb17637_c2/flp0/568      | NA                      | NA                          |
| R01_cb13710_c3/flp0/362      | R01_cb13710_c3/flp0/362 | R01_cb13710_c3/flp0/362      | R01_cb13710_c3/flp0/362 | R01_cb13710_c3/flp0/362     |
| R01_cb8564_c121564/flp0/2376 | NA                      | R01_cb8564_c121564/flp0/2376 | NA                      | NA                          |
| R01_cb9906_c1/flp0/3344      | R01_cb9906_c1/flp0/3344 | R01_cb9906_c1/flp0/3344      | R01_cb9906_c1/flp0/3344 | R01_cb9906_c1/flp0/3344     |
| R01_cb10068_c23/flp0/1377    | NA                      | R01_cb10068_c23/flp0/1377    | NA                      | NA                          |
| R01_cb1378_c15/flp0/603      | NA                      | R01_cb1378_c15/flp0/603      | R01_cb1378_c15/flp0/603 | R01_cb1378_c15/flp0/603     |
| R01_cb6090_c1/flp0/2937      | NA                      | NA                           | NA                      | R01_cb6090_c1/flp0/2937     |
| R01_cb5000_c7/flp0/4027      | R01_cb5000_c7/flp0/4027 | R01_cb5000_c7/flp0/4027      | R01_cb5000_c7/flp0/4027 | R01_cb5000_c7/flp0/4027     |
| R01_cb17886_c1/flp0/1421     | NA                      | NA                           | NA                      | R01_cb17886_c1/flp0/1421    |
| R01_cb18456_c3354/flp10/1022 | NA                      | R01_cb18456_c3354/flp10/1022 | NA                      | NA                          |
| R01_cb2959_c4/flp0/3532      | NA                      | NA                           | NA                      | R01_cb2959_c4/flp0/3532     |
| R01_cb11072_c1/f4p1/549      | NA                      | R01_cb11072_c1/f4p1/549      | NA                      | NA                          |
| R01_cb4357_c1/flp0/3408      | NA                      | R01_cb4357_c1/flp0/3408      | NA                      | NA                          |
| R01_cb470_c13/flp0/2876      | NA                      | R01_cb470_c13/flp0/2876      | NA                      | NA                          |

|                              |                           |                              |                            |                             |
|------------------------------|---------------------------|------------------------------|----------------------------|-----------------------------|
| R01_cb17873_c1/flp0/1385     | NA                        | R01_cb17873_c1/flp0/1385     | NA                         | NA                          |
| R01_cb17300_c1/flp0/818      | NA                        | NA                           | NA                         | R01_cb17300_c1/flp0/818     |
| R01_cb13910_c17/flp0/1426    | R01_cb13910_c17/flp0/1426 | R01_cb13910_c17/flp0/1426    | R01_cb13910_c17/flp0/1426  | R01_cb13910_c17/flp0/1426   |
| R01_cb6163_c8/flp0/2271      | NA                        | R01_cb6163_c8/flp0/2271      | NA                         | NA                          |
| R01_cb10314_c2/f2p2/703      | NA                        | R01_cb10314_c2/f2p2/703      | NA                         | NA                          |
| R01_cb9648_c15/flp0/1532     | NA                        | NA                           | NA                         | R01_cb9648_c15/flp0/1532    |
| R01_cb11796_c0/flp0/1501     | NA                        | R01_cb11796_c0/flp0/1501     | NA                         | NA                          |
| R01_cb18456_c6441/flp0/843   | NA                        | NA                           | R01_cb18456_c6441/flp0/843 | R01_cb18456_c6441/flp0/843  |
| R01_cb17474_c0/f2p0/423      | NA                        | R01_cb17474_c0/f2p0/423      | NA                         | NA                          |
| R01_cb822_c20/flp1/2333      | NA                        | NA                           | NA                         | R01_cb822_c20/flp1/2333     |
| R01_cb2959_c9/flp0/2767      | NA                        | NA                           | NA                         | R01_cb2959_c9/flp0/2767     |
| R01_cb8564_c40675/flp0/2856  | NA                        | R01_cb8564_c40675/flp0/2856  | NA                         | R01_cb8564_c40675/flp0/2856 |
| R01_cb8564_c145727/f5p1/2610 | NA                        | R01_cb8564_c145727/f5p1/2610 | NA                         | NA                          |
| R01_cb14937_c0/f6p0/869      | NA                        | NA                           | R01_cb14937_c0/f6p0/869    | R01_cb14937_c0/f6p0/869     |
| R01_cb14125_c125/flp0/628    | NA                        | R01_cb14125_c125/flp0/628    | R01_cb14125_c125/flp0/628  | NA                          |
| R01_cb1178_c16/flp0/1671     | NA                        | NA                           | NA                         | R01_cb1178_c16/flp0/1671    |
| R01_cb11178_c0/flp0/891      | R01_cb11178_c0/flp0/891   | R01_cb11178_c0/flp0/891      | R01_cb11178_c0/flp0/891    | R01_cb11178_c0/flp0/891     |
| R01_cb2708_c13/flp0/3388     | R01_cb2708_c13/flp0/3388  | R01_cb2708_c13/flp0/3388     | NA                         | R01_cb2708_c13/flp0/3388    |
| R01_cb7584_c9/flp0/2139      | NA                        | R01_cb7584_c9/flp0/2139      | NA                         | NA                          |
| R01_cb929_c4/flp1/2480       | NA                        | NA                           | NA                         | R01_cb929_c4/flp1/2480      |
| R01_cb16465_c0/flp1/675      | R01_cb16465_c0/flp1/675   | R01_cb16465_c0/flp1/675      | R01_cb16465_c0/flp1/675    | R01_cb16465_c0/flp1/675     |
| R01_cb18387_c0/f3p0/336      | NA                        | R01_cb18387_c0/f3p0/336      | R01_cb18387_c0/f3p0/336    | R01_cb18387_c0/f3p0/336     |
| R01_cb1739_c12/flp0/551      | NA                        | NA                           | NA                         | R01_cb1739_c12/flp0/551     |
| R01_cb4681_c0/flp1/3285      | NA                        | NA                           | R01_cb4681_c0/flp1/3285    | NA                          |
| R01_cb5373_c0/f5p0/2920      | NA                        | NA                           | NA                         | R01_cb5373_c0/f5p0/2920     |

|                             |                            |                             |                             |                            |
|-----------------------------|----------------------------|-----------------------------|-----------------------------|----------------------------|
| R01_cb18196_c0/flp0/615     | R01_cb18196_c0/flp0/615    | R01_cb18196_c0/flp0/615     | NA                          | R01_cb18196_c0/flp0/615    |
| R01_cb15308_c3/flp0/911     | NA                         | NA                          | R01_cb15308_c3/flp0/911     | R01_cb15308_c3/flp0/911    |
| R01_cb14726_c1/flp0/958     | NA                         | NA                          | NA                          | R01_cb14726_c1/flp0/958    |
| R01_cb8564_c4488/flp0/2817  | NA                         | NA                          | NA                          | R01_cb8564_c4488/flp0/2817 |
| R01_cb18456_c7522/flp0/775  | R01_cb18456_c7522/flp0/775 | R01_cb18456_c7522/flp0/775  | R01_cb18456_c7522/flp0/775  | R01_cb18456_c7522/flp0/775 |
| R01_cb8564_c73473/flp1/2503 | NA                         | R01_cb8564_c73473/flp1/2503 | R01_cb8564_c73473/flp1/2503 | NA                         |
| R01_cb15665_c0/flp0/1425    | NA                         | R01_cb15665_c0/flp0/1425    | NA                          | NA                         |
| R01_cb4147_c3/f2p0/2421     | NA                         | NA                          | NA                          | R01_cb4147_c3/f2p0/2421    |
| R01_cb15999_c0/f3p0/477     | NA                         | R01_cb15999_c0/f3p0/477     | NA                          | NA                         |
| R01_cb10246_c3/flp0/341     | R01_cb10246_c3/flp0/341    | R01_cb10246_c3/flp0/341     | R01_cb10246_c3/flp0/341     | R01_cb10246_c3/flp0/341    |
| R01_cb17612_c2/flp1/1031    | NA                         | R01_cb17612_c2/flp1/1031    | NA                          | NA                         |
| R01_cb1887_c3/flp0/2571     | NA                         | NA                          | NA                          | R01_cb1887_c3/flp0/2571    |
| R01_cb4981_c3/flp0/3014     | NA                         | R01_cb4981_c3/flp0/3014     | NA                          | R01_cb4981_c3/flp0/3014    |
| R01_cb882_c6/flp0/5018      | NA                         | NA                          | NA                          | R01_cb882_c6/flp0/5018     |
| R01_cb18273_c1/flp0/1345    | NA                         | R01_cb18273_c1/flp0/1345    | NA                          | NA                         |
| R01_cb10414_c2/flp1/3224    | NA                         | R01_cb10414_c2/flp1/3224    | NA                          | NA                         |
| R01_cb3287_c5/flp0/3334     | NA                         | NA                          | NA                          | R01_cb3287_c5/flp0/3334    |
| R01_cb7108_c6/flp0/2585     | NA                         | NA                          | NA                          | R01_cb7108_c6/flp0/2585    |
| R01_cb10809_c1/flp0/2163    | NA                         | R01_cb10809_c1/flp0/2163    | NA                          | NA                         |
| R01_cb9088_c0/f2p0/2120     | NA                         | NA                          | NA                          | R01_cb9088_c0/f2p0/2120    |
| R01_cb5815_c5/flp0/2550     | NA                         | R01_cb5815_c5/flp0/2550     | NA                          | NA                         |
| R01_cb18456_c3241/flp0/941  | NA                         | R01_cb18456_c3241/flp0/941  | NA                          | NA                         |
| R01_cb15725_c7/f5p0/1434    | NA                         | NA                          | NA                          | R01_cb15725_c7/f5p0/1434   |
| R01_cb8564_c71381/flp0/3321 | NA                         | R01_cb8564_c71381/flp0/3321 | NA                          | NA                         |
| R01_cb6666_c9/flp0/2543     | NA                         | NA                          | NA                          | R01_cb6666_c9/flp0/2543    |
| R01_cb14898_c0/flp0/1836    | NA                         | NA                          | NA                          | R01_cb14898_c0/flp0/1836   |



|                                  |                                   |                                  |                                  |                                  |
|----------------------------------|-----------------------------------|----------------------------------|----------------------------------|----------------------------------|
| R01_cb8564_c120273/flp0/213<br>7 | NA                                | R01_cb8564_c120273/flp0/213<br>7 | NA                               | NA                               |
| R01_cb8564_c130068/flp1/390<br>8 | R01_cb8564_c130068/flp1/390<br>08 | R01_cb8564_c130068/flp1/390<br>8 | R01_cb8564_c130068/flp1/390<br>8 | R01_cb8564_c130068/flp1/390<br>8 |
| R01_cb11802_c0/flp0/864          | R01_cb11802_c0/flp0/864           | R01_cb11802_c0/flp0/864          | NA                               | R01_cb11802_c0/flp0/864          |
| R01_cb9281_c3/flp0/2611          | NA                                | NA                               | NA                               | R01_cb9281_c3/flp0/2611          |
| R01_cb12972_c27/flp0/525         | NA                                | R01_cb12972_c27/flp0/525         | R01_cb12972_c27/flp0/525         | R01_cb12972_c27/flp0/525         |
| R01_cb1982_c1/flp0/3354          | R01_cb1982_c1/flp0/3354           | R01_cb1982_c1/flp0/3354          | R01_cb1982_c1/flp0/3354          | R01_cb1982_c1/flp0/3354          |
| R01_cb3774_c3/f8p0/1883          | NA                                | NA                               | NA                               | R01_cb3774_c3/f8p0/1883          |
| R01_cb3074_c2/flp0/1125          | NA                                | NA                               | NA                               | R01_cb3074_c2/flp0/1125          |
| R01_cb7803_c0/flp0/2531          | NA                                | R01_cb7803_c0/flp0/2531          | NA                               | NA                               |
| R01_cb8564_c25121/flp0/1830      | NA                                | R01_cb8564_c25121/flp0/1830      | R01_cb8564_c25121/flp0/1830      | R01_cb8564_c25121/flp0/1830      |
| R01_cb18287_c4/flp0/521          | NA                                | R01_cb18287_c4/flp0/521          | R01_cb18287_c4/flp0/521          | R01_cb18287_c4/flp0/521          |
| R01_cb11257_c2/flp0/3533         | NA                                | NA                               | NA                               | R01_cb11257_c2/flp0/3533         |
| R01_cb7999_c2/flp0/2565          | R01_cb7999_c2/flp0/2565           | R01_cb7999_c2/flp0/2565          | NA                               | R01_cb7999_c2/flp0/2565          |
| R01_cb4198_c7/flp0/2272          | NA                                | NA                               | NA                               | R01_cb4198_c7/flp0/2272          |
| R01_cb1668_c11/flp0/2234         | NA                                | R01_cb1668_c11/flp0/2234         | NA                               | NA                               |
| R01_cb12972_c18/flp0/1604        | NA                                | R01_cb12972_c18/flp0/1604        | NA                               | NA                               |
| R01_cb2870_c18/f2p1/2618         | NA                                | NA                               | NA                               | R01_cb2870_c18/f2p1/2618         |
| R01_cb8564_c9731/f2p0/2421       | NA                                | R01_cb8564_c9731/f2p0/2421       | NA                               | NA                               |
| R01_cb2688_c3/flp0/2921          | R01_cb2688_c3/flp0/2921           | R01_cb2688_c3/flp0/2921          | R01_cb2688_c3/flp0/2921          | R01_cb2688_c3/flp0/2921          |
| R01_cb5533_c143/flp0/2760        | NA                                | R01_cb5533_c143/flp0/2760        | NA                               | NA                               |
| R01_cb8564_c4719/flp0/2639       | NA                                | R01_cb8564_c4719/flp0/2639       | NA                               | R01_cb8564_c4719/flp0/2639       |
| R01_cb2676_c22/flp0/2029         | NA                                | NA                               | NA                               | R01_cb2676_c22/flp0/2029         |
| R01_cb3219_c2/flp0/3884          | NA                                | R01_cb3219_c2/flp0/3884          | NA                               | R01_cb3219_c2/flp0/3884          |
| R01_cb18417_c1/flp0/1805         | NA                                | R01_cb18417_c1/flp0/1805         | R01_cb18417_c1/flp0/1805         | R01_cb18417_c1/flp0/1805         |

|                              |                          |                              |                          |                              |
|------------------------------|--------------------------|------------------------------|--------------------------|------------------------------|
| R01_cb11201_c4/f1p0/579      | R01_cb11201_c4/f1p0/579  | R01_cb11201_c4/f1p0/579      | NA                       | NA                           |
| R01_cb16185_c0/f1p0/468      | R01_cb16185_c0/f1p0/468  | R01_cb16185_c0/f1p0/468      | R01_cb16185_c0/f1p0/468  | R01_cb16185_c0/f1p0/468      |
| R01_cb8564_c52738/f1p0/3595  | NA                       | NA                           | NA                       | R01_cb8564_c52738/f1p0/3595  |
| R01_cb18370_c1/f1p0/692      | R01_cb18370_c1/f1p0/692  | R01_cb18370_c1/f1p0/692      | R01_cb18370_c1/f1p0/692  | R01_cb18370_c1/f1p0/692      |
| R01_cb16772_c1/f1p0/1441     | NA                       | NA                           | NA                       | R01_cb16772_c1/f1p0/1441     |
| R01_cb14639_c5/f1p0/409      | NA                       | R01_cb14639_c5/f1p0/409      | NA                       | NA                           |
| R01_cb11574_c1/f1p0/1977     | NA                       | NA                           | NA                       | R01_cb11574_c1/f1p0/1977     |
| R01_cb6424_c2/f1p0/2856      | NA                       | R01_cb6424_c2/f1p0/2856      | NA                       | NA                           |
| R01_cb14469_c2/f1p2/688      | NA                       | R01_cb14469_c2/f1p2/688      | R01_cb14469_c2/f1p2/688  | R01_cb14469_c2/f1p2/688      |
| R01_cb17042_c0/f1p1/1015     | NA                       | R01_cb17042_c0/f1p1/1015     | R01_cb17042_c0/f1p1/1015 | R01_cb17042_c0/f1p1/1015     |
| R01_cb15019_c1/f4p0/564      | R01_cb15019_c1/f4p0/564  | R01_cb15019_c1/f4p0/564      | R01_cb15019_c1/f4p0/564  | R01_cb15019_c1/f4p0/564      |
| R01_cb5782_c4/f2p0/2916      | NA                       | NA                           | NA                       | R01_cb5782_c4/f2p0/2916      |
| R01_cb8568_c21/f1p0/2336     | R01_cb8568_c21/f1p0/2336 | R01_cb8568_c21/f1p0/2336     | R01_cb8568_c21/f1p0/2336 | R01_cb8568_c21/f1p0/2336     |
| R01_cb16092_c5/f1p0/420      | R01_cb16092_c5/f1p0/420  | R01_cb16092_c5/f1p0/420      | R01_cb16092_c5/f1p0/420  | R01_cb16092_c5/f1p0/420      |
| R01_cb13464_c10/f30p2/598    | NA                       | R01_cb13464_c10/f30p2/598    | NA                       | NA                           |
| R01_cb8564_c115053/f1p0/3109 | NA                       | R01_cb8564_c115053/f1p0/3109 | NA                       | NA                           |
| R01_cb8564_c106041/f2p2/2940 | NA                       | NA                           | NA                       | R01_cb8564_c106041/f2p2/2940 |
| R01_cb16653_c0/f2p0/1555     | NA                       | NA                           | NA                       | R01_cb16653_c0/f2p0/1555     |
| R01_cb7450_c7/f1p0/5653      | NA                       | R01_cb7450_c7/f1p0/5653      | NA                       | NA                           |
| R01_cb7029_c1/f1p0/2712      | NA                       | R01_cb7029_c1/f1p0/2712      | R01_cb7029_c1/f1p0/2712  | R01_cb7029_c1/f1p0/2712      |
| R01_cb110_c9/f1p0/3058       | NA                       | NA                           | NA                       | R01_cb110_c9/f1p0/3058       |
| R01_cb3791_c4/f1p0/2359      | NA                       | NA                           | NA                       | R01_cb3791_c4/f1p0/2359      |
| R01_cb17765_c0/f3p0/654      | NA                       | R01_cb17765_c0/f3p0/654      | R01_cb17765_c0/f3p0/654  | R01_cb17765_c0/f3p0/654      |
| R01_cb18456_c3308/f1p3/1087  | NA                       | R01_cb18456_c3308/f1p3/1087  | NA                       | NA                           |

|                              |                             |                             |                             |                              |
|------------------------------|-----------------------------|-----------------------------|-----------------------------|------------------------------|
| R01_cb7595_c16/flp0/1434     | NA                          | R01_cb7595_c16/flp0/1434    | NA                          | NA                           |
| R01_cb6328_c2/flp0/2742      | NA                          | NA                          | NA                          | R01_cb6328_c2/flp0/2742      |
| R01_cb8564_c2592/flp0/4172   | NA                          | R01_cb8564_c2592/flp0/4172  | NA                          | NA                           |
| R01_cb8863_c5/flp0/2026      | NA                          | R01_cb8863_c5/flp0/2026     | NA                          | NA                           |
| R01_cb1813_c13/flp0/2526     | NA                          | NA                          | NA                          | R01_cb1813_c13/flp0/2526     |
| R01_cb12012_c2/flp0/1624     | NA                          | NA                          | NA                          | R01_cb12012_c2/flp0/1624     |
| R01_cb8365_c2/flp0/2001      | NA                          | R01_cb8365_c2/flp0/2001     | NA                          | NA                           |
| R01_cb5040_c69/flp1/3154     | NA                          | NA                          | NA                          | R01_cb5040_c69/flp1/3154     |
| R01_cb8564_c121005/flp1/1998 | NA                          | NA                          | NA                          | R01_cb8564_c121005/flp1/1998 |
| R01_cb5131_c3/flp0/2671      | NA                          | R01_cb5131_c3/flp0/2671     | NA                          | NA                           |
| R01_cb4169_c7/flp0/1995      | NA                          | NA                          | NA                          | R01_cb4169_c7/flp0/1995      |
| R01_cb17184_c3/flp0/572      | R01_cb17184_c3/flp0/572     | R01_cb17184_c3/flp0/572     | NA                          | NA                           |
| R01_cb8564_c3819/flp1/2846   | NA                          | NA                          | NA                          | R01_cb8564_c3819/flp1/2846   |
| R01_cb10604_c1/flp0/2230     | NA                          | R01_cb10604_c1/flp0/2230    | R01_cb10604_c1/flp0/2230    | NA                           |
| R01_cb422_c0/flp0/4825       | NA                          | NA                          | NA                          | R01_cb422_c0/flp0/4825       |
| R01_cb17652_c1/flp0/1020     | NA                          | NA                          | R01_cb17652_c1/flp0/1020    | R01_cb17652_c1/flp0/1020     |
| R01_cb5745_c5/flp0/1695      | NA                          | NA                          | NA                          | R01_cb5745_c5/flp0/1695      |
| R01_cb2400_c1/flp0/2223      | NA                          | R01_cb2400_c1/flp0/2223     | R01_cb2400_c1/flp0/2223     | R01_cb2400_c1/flp0/2223      |
| R01_cb9270_c4/flp0/2740      | R01_cb9270_c4/flp0/2740     | R01_cb9270_c4/flp0/2740     | R01_cb9270_c4/flp0/2740     | R01_cb9270_c4/flp0/2740      |
| R01_cb11793_c0/flp0/1497     | NA                          | R01_cb11793_c0/flp0/1497    | NA                          | NA                           |
| R01_cb8564_c80211/flp0/4044  | R01_cb8564_c80211/flp0/4044 | R01_cb8564_c80211/flp0/4044 | R01_cb8564_c80211/flp0/4044 | R01_cb8564_c80211/flp0/4044  |
| R01_cb6982_c2/flp0/1326      | R01_cb6982_c2/flp0/1326     | R01_cb6982_c2/flp0/1326     | R01_cb6982_c2/flp0/1326     | R01_cb6982_c2/flp0/1326      |
| R01_cb8564_c86065/flp0/3002  | R01_cb8564_c86065/flp0/3002 | R01_cb8564_c86065/flp0/3002 | R01_cb8564_c86065/flp0/3002 | R01_cb8564_c86065/flp0/3002  |

|                             |                            |                             |                          |                             |
|-----------------------------|----------------------------|-----------------------------|--------------------------|-----------------------------|
| R01_cb11451_c1/flp0/2542    | NA                         | R01_cb11451_c1/flp0/2542    | NA                       | R01_cb11451_c1/flp0/2542    |
| R01_cb5533_c166/flp0/684    | R01_cb5533_c166/flp0/684   | R01_cb5533_c166/flp0/684    | R01_cb5533_c166/flp0/684 | R01_cb5533_c166/flp0/684    |
| R01_cb313_c17/flp0/3434     | NA                         | R01_cb313_c17/flp0/3434     | NA                       | NA                          |
| R01_cb9656_c0/flp1/2020     | NA                         | NA                          | NA                       | R01_cb9656_c0/flp1/2020     |
| R01_cb17_c19/flp0/2966      | NA                         | NA                          | NA                       | R01_cb17_c19/flp0/2966      |
| R01_cb11413_c3/flp0/1901    | NA                         | R01_cb11413_c3/flp0/1901    | R01_cb11413_c3/flp0/1901 | R01_cb11413_c3/flp0/1901    |
| R01_cb10029_c107/flp3/795   | NA                         | R01_cb10029_c107/flp3/795   | NA                       | NA                          |
| R01_cb8564_c80030/flp0/3424 | NA                         | R01_cb8564_c80030/flp0/3424 | NA                       | R01_cb8564_c80030/flp0/3424 |
| R01_cb18456_c6962/flp0/640  | R01_cb18456_c6962/flp0/640 | R01_cb18456_c6962/flp0/640  | NA                       | NA                          |
| R01_cb16896_c0/flp0/1117    | NA                         | R01_cb16896_c0/flp0/1117    | NA                       | R01_cb16896_c0/flp0/1117    |
| R01_cb3896_c3/flp0/3491     | R01_cb3896_c3/flp0/3491    | NA                          | NA                       | R01_cb3896_c3/flp0/3491     |
| R01_cb14157_c2/flp0/1488    | NA                         | R01_cb14157_c2/flp0/1488    | NA                       | NA                          |
| R01_cb8628_c2/flp0/1062     | NA                         | NA                          | NA                       | R01_cb8628_c2/flp0/1062     |
| R01_cb16341_c9/flp0/440     | R01_cb16341_c9/flp0/440    | R01_cb16341_c9/flp0/440     | R01_cb16341_c9/flp0/440  | R01_cb16341_c9/flp0/440     |
| R01_cb1228_c51/flp0/1417    | NA                         | NA                          | NA                       | R01_cb1228_c51/flp0/1417    |
| R01_cb8564_c34638/flp0/2817 | NA                         | R01_cb8564_c34638/flp0/2817 | NA                       | NA                          |
| R01_cb8564_c87713/flp0/2432 | NA                         | R01_cb8564_c87713/flp0/2432 | NA                       | NA                          |
| R01_cb10015_c246/flp0/690   | R01_cb10015_c246/flp0/690  | R01_cb10015_c246/flp0/690   | NA                       | NA                          |
| R01_cb13261_c3/flp0/883     | NA                         | NA                          | NA                       | R01_cb13261_c3/flp0/883     |
| R01_cb8564_c73593/flp0/3554 | NA                         | R01_cb8564_c73593/flp0/3554 | NA                       | NA                          |
| R01_cb2352_c4/flp0/3973     | NA                         | R01_cb2352_c4/flp0/3973     | R01_cb2352_c4/flp0/3973  | R01_cb2352_c4/flp0/3973     |
| R01_cb4041_c0/f2p0/3129     | NA                         | R01_cb4041_c0/f2p0/3129     | NA                       | R01_cb4041_c0/f2p0/3129     |
| R01_cb8564_c127788/flp0/280 | NA                         | R01_cb8564_c127788/flp0/280 | NA                       | NA                          |
| 0                           |                            | 0                           |                          |                             |
| R01_cb13675_c2/flp0/792     | NA                         | NA                          | R01_cb13675_c2/flp0/792  | NA                          |
| R01_cb8564_c133426/flp2/279 | NA                         | R01_cb8564_c133426/flp2/279 | NA                       | NA                          |

|                             |                            |                             |                            |                             |
|-----------------------------|----------------------------|-----------------------------|----------------------------|-----------------------------|
| 7                           |                            | 7                           |                            |                             |
| R01_cb10649_c2/flp0/826     | NA                         | R01_cb10649_c2/flp0/826     | NA                         | NA                          |
| R01_cb8564_c123147/flp0/265 | NA                         | NA                          | NA                         | R01_cb8564_c123147/flp0/265 |
| 7                           |                            | 7                           |                            | 7                           |
| R01_cb14945_c6/flp0/1110    | NA                         | R01_cb14945_c6/flp0/1110    | NA                         | NA                          |
| R01_cb8564_c127658/flp0/356 | NA                         | NA                          | NA                         | R01_cb8564_c127658/flp0/356 |
| 7                           |                            | 7                           |                            | 7                           |
| R01_cb10190_c2/flp0/2194    | R01_cb10190_c2/flp0/2194   | R01_cb10190_c2/flp0/2194    | R01_cb10190_c2/flp0/2194   | R01_cb10190_c2/flp0/2194    |
| R01_cb17744_c17/flp0/3235   | NA                         | NA                          | NA                         | R01_cb17744_c17/flp0/3235   |
| R01_cb8868_c0/f2p0/2247     | NA                         | R01_cb8868_c0/f2p0/2247     | R01_cb8868_c0/f2p0/2247    | R01_cb8868_c0/f2p0/2247     |
| R01_cb10849_c7/flp0/671     | NA                         | R01_cb10849_c7/flp0/671     | NA                         | R01_cb10849_c7/flp0/671     |
| R01_cb2007_c2/f2p1/2738     | NA                         | R01_cb2007_c2/f2p1/2738     | NA                         | NA                          |
| R01_cb17453_c0/flp0/763     | NA                         | NA                          | R01_cb17453_c0/flp0/763    | R01_cb17453_c0/flp0/763     |
| R01_cb8345_c1/flp0/2379     | NA                         | NA                          | NA                         | R01_cb8345_c1/flp0/2379     |
| R01_cb15550_c1/flp0/622     | R01_cb15550_c1/flp0/622    | R01_cb15550_c1/flp0/622     | NA                         | R01_cb15550_c1/flp0/622     |
| R01_cb8564_c50449/flp0/3504 | NA                         | R01_cb8564_c50449/flp0/3504 | NA                         | NA                          |
| R01_cb9467_c28/flp0/2130    | NA                         | R01_cb9467_c28/flp0/2130    | NA                         | NA                          |
| R01_cb18456_c7319/flp0/480  | R01_cb18456_c7319/flp0/480 | R01_cb18456_c7319/flp0/480  | R01_cb18456_c7319/flp0/480 | R01_cb18456_c7319/flp0/480  |
| R01_cb8564_c118694/flp0/230 | NA                         | R01_cb8564_c118694/flp0/230 | NA                         | NA                          |
| 3                           |                            | 3                           |                            |                             |
| R01_cb12775_c0/f3p2/1307    | NA                         | NA                          | NA                         | R01_cb12775_c0/f3p2/1307    |
| R01_cb124_c26/flp0/3756     | NA                         | NA                          | NA                         | R01_cb124_c26/flp0/3756     |
| R01_cb17049_c1/flp0/700     | NA                         | R01_cb17049_c1/flp0/700     | NA                         | R01_cb17049_c1/flp0/700     |
| R01_cb6513_c1/f3p0/2254     | NA                         | NA                          | NA                         | R01_cb6513_c1/f3p0/2254     |
| R01_cb17266_c5/flp0/943     | NA                         | R01_cb17266_c5/flp0/943     | R01_cb17266_c5/flp0/943    | R01_cb17266_c5/flp0/943     |
| R01_cb1468_c8/flp0/2956     | NA                         | R01_cb1468_c8/flp0/2956     | NA                         | NA                          |

|                             |                             |                             |                             |                             |
|-----------------------------|-----------------------------|-----------------------------|-----------------------------|-----------------------------|
| R01_cb16814_c0/flp0/719     | NA                          | NA                          | NA                          | R01_cb16814_c0/flp0/719     |
| R01_cb8564_c118539/flp0/239 | R01_cb8564_c118539/flp0/239 | R01_cb8564_c118539/flp0/239 | R01_cb8564_c118539/flp0/239 | R01_cb8564_c118539/flp0/239 |
| 1                           | 91                          | 1                           | 1                           | 1                           |
| R01_cb14083_c1/flp0/900     | NA                          | R01_cb14083_c1/flp0/900     | NA                          | NA                          |
| R01_cb18456_c6975/flp0/362  | R01_cb18456_c6975/flp0/362  | R01_cb18456_c6975/flp0/362  | R01_cb18456_c6975/flp0/362  | R01_cb18456_c6975/flp0/362  |
| R01_cb2779_c1/flp1/3812     | NA                          | NA                          | NA                          | R01_cb2779_c1/flp1/3812     |
| R01_cb15911_c2/flp0/1696    | NA                          | R01_cb15911_c2/flp0/1696    | NA                          | NA                          |
| R01_cb18456_c5603/flp0/1203 | NA                          | R01_cb18456_c5603/flp0/1203 | NA                          | NA                          |
| R01_cb8564_c120968/f2p0/269 | NA                          | R01_cb8564_c120968/f2p0/269 | NA                          | R01_cb8564_c120968/f2p0/269 |
| 5                           |                             | 5                           |                             | 5                           |
| R01_cb8681_c2/flp0/2210     | NA                          | R01_cb8681_c2/flp0/2210     | R01_cb8681_c2/flp0/2210     | R01_cb8681_c2/flp0/2210     |
| R01_cb18014_c0/flp0/1261    | NA                          | NA                          | NA                          | R01_cb18014_c0/flp0/1261    |
| R01_cb3813_c3/flp0/1831     | NA                          | R01_cb3813_c3/flp0/1831     | NA                          | NA                          |
| R01_cb8564_c69617/f4p0/3013 | NA                          | R01_cb8564_c69617/f4p0/3013 | NA                          | R01_cb8564_c69617/f4p0/3013 |
| R01_cb6597_c15/flp0/2081    | NA                          | NA                          | NA                          | R01_cb6597_c15/flp0/2081    |
| R01_cb8564_c3047/flp0/2490  | NA                          | R01_cb8564_c3047/flp0/2490  | R01_cb8564_c3047/flp0/2490  | R01_cb8564_c3047/flp0/2490  |
| R01_cb8564_c75247/flp2/2626 | R01_cb8564_c75247/flp2/2626 | R01_cb8564_c75247/flp2/2626 | NA                          | NA                          |
| 6                           |                             |                             |                             |                             |
| R01_cb10799_c2/flp0/3682    | NA                          | R01_cb10799_c2/flp0/3682    | NA                          | R01_cb10799_c2/flp0/3682    |
| R01_cb10648_c3/flp1/797     | NA                          | R01_cb10648_c3/flp1/797     | NA                          | NA                          |
| R01_cb8564_c3324/flp0/2768  | R01_cb8564_c3324/flp0/2768  | R01_cb8564_c3324/flp0/2768  | R01_cb8564_c3324/flp0/2768  | R01_cb8564_c3324/flp0/2768  |
| R01_cb18456_c5636/flp0/490  | NA                          | NA                          | NA                          | R01_cb18456_c5636/flp0/490  |
| R01_cb16665_c1/flp0/996     | NA                          | NA                          | R01_cb16665_c1/flp0/996     | R01_cb16665_c1/flp0/996     |
| R01_cb4410_c0/f2p0/3318     | NA                          | R01_cb4410_c0/f2p0/3318     | NA                          | R01_cb4410_c0/f2p0/3318     |
| R01_cb10015_c611/f15p0/580  | R01_cb10015_c611/f15p0/580  | R01_cb10015_c611/f15p0/580  | R01_cb10015_c611/f15p0/580  | NA                          |
| R01_cb13761_c12/flp0/655    | R01_cb13761_c12/flp0/655    | R01_cb13761_c12/flp0/655    | R01_cb13761_c12/flp0/655    | R01_cb13761_c12/flp0/655    |

|                             |                             |                             |                             |                             |
|-----------------------------|-----------------------------|-----------------------------|-----------------------------|-----------------------------|
| R01_cb6328_c0/f4p0/2707     | NA                          | NA                          | NA                          | R01_cb6328_c0/f4p0/2707     |
| R01_cb3859_c1/f1p0/3510     | NA                          | R01_cb3859_c1/f1p0/3510     | NA                          | R01_cb3859_c1/f1p0/3510     |
| R01_cb5042_c4/f1p0/3767     | NA                          | NA                          | R01_cb5042_c4/f1p0/3767     | NA                          |
| R01_cb13545_c53/f1p0/416    | R01_cb13545_c53/f1p0/416    | R01_cb13545_c53/f1p0/416    | R01_cb13545_c53/f1p0/416    | R01_cb13545_c53/f1p0/416    |
| R01_cb8564_c14679/f1p0/3095 | R01_cb8564_c14679/f1p0/3095 | R01_cb8564_c14679/f1p0/3095 | R01_cb8564_c14679/f1p0/3095 | R01_cb8564_c14679/f1p0/3095 |
| R01_cb4631_c12/f1p0/2111    | NA                          | NA                          | NA                          | R01_cb4631_c12/f1p0/2111    |
| R01_cb647_c14/f1p2/1446     | NA                          | NA                          | NA                          | R01_cb647_c14/f1p2/1446     |
| R01_cb11771_c0/f1p0/1449    | NA                          | NA                          | R01_cb11771_c0/f1p0/1449    | R01_cb11771_c0/f1p0/1449    |
| R01_cb8564_c70659/f1p0/4083 | NA                          | NA                          | NA                          | R01_cb8564_c70659/f1p0/4083 |
| R01_cb9777_c3/f1p0/1950     | NA                          | NA                          | NA                          | R01_cb9777_c3/f1p0/1950     |
| R01_cb6706_c1/f3p0/1450     | NA                          | NA                          | NA                          | R01_cb6706_c1/f3p0/1450     |
| R01_cb8023_c5/f1p0/2277     | NA                          | NA                          | R01_cb8023_c5/f1p0/2277     | R01_cb8023_c5/f1p0/2277     |
| R01_cb6170_c17/f1p1/2649    | NA                          | R01_cb6170_c17/f1p1/2649    | NA                          | R01_cb6170_c17/f1p1/2649    |
| R01_cb438_c9/f1p0/2672      | NA                          | NA                          | NA                          | R01_cb438_c9/f1p0/2672      |
| R01_cb8564_c25521/f1p0/2483 | NA                          | NA                          | NA                          | R01_cb8564_c25521/f1p0/2483 |
| R01_cb15255_c2/f1p0/849     | NA                          | NA                          | NA                          | R01_cb15255_c2/f1p0/849     |
| R01_cb2045_c6/f1p0/2314     | NA                          | NA                          | NA                          | R01_cb2045_c6/f1p0/2314     |
| R01_cb8564_c19603/f1p0/2850 | NA                          | NA                          | NA                          | R01_cb8564_c19603/f1p0/2850 |
| R01_cb8564_c122642/f1p0/306 | R01_cb8564_c122642/f1p0/306 | R01_cb8564_c122642/f1p0/306 | R01_cb8564_c122642/f1p0/306 | R01_cb8564_c122642/f1p0/306 |
| R01_cb8564_c90576/f2p0/2673 | NA                          | NA                          | R01_cb8564_c90576/f2p0/2673 | R01_cb8564_c90576/f2p0/2673 |
| R01_cb8564_c1189/f1p0/2710  | NA                          | R01_cb8564_c1189/f1p0/2710  | NA                          | NA                          |
| R01_cb5533_c132/f1p0/2007   | NA                          | NA                          | NA                          | R01_cb5533_c132/f1p0/2007   |
| R01_cb6113_c6/f1p0/2008     | NA                          | NA                          | NA                          | R01_cb6113_c6/f1p0/2008     |
| R01_cb8564_c38068/f1p0/3466 | R01_cb8564_c38068/f1p0/3466 | R01_cb8564_c38068/f1p0/3466 | R01_cb8564_c38068/f1p0/3466 | R01_cb8564_c38068/f1p0/3466 |

|                             |                             |                             |                             |                             |
|-----------------------------|-----------------------------|-----------------------------|-----------------------------|-----------------------------|
|                             | 6                           |                             |                             |                             |
| R01_cb4334_c2/flp0/3372     | NA                          | R01_cb4334_c2/flp0/3372     | NA                          | NA                          |
| R01_cb525_c10/f6p0/2020     | NA                          | NA                          | NA                          | R01_cb525_c10/f6p0/2020     |
| R01_cb17791_c1/flp0/1721    | NA                          | NA                          | NA                          | R01_cb17791_c1/flp0/1721    |
| R01_cb1813_c7/f2p1/2805     | NA                          | NA                          | NA                          | R01_cb1813_c7/f2p1/2805     |
| R01_cb14615_c3/flp0/1131    | NA                          | NA                          | NA                          | R01_cb14615_c3/flp0/1131    |
| R01_cb2682_c1/flp0/3843     | NA                          | NA                          | NA                          | R01_cb2682_c1/flp0/3843     |
| R01_cb10409_c10/flp0/924    | NA                          | R01_cb10409_c10/flp0/924    | NA                          | NA                          |
| R01_cb8564_c17839/f2p0/4068 | R01_cb8564_c17839/f2p0/4068 | R01_cb8564_c17839/f2p0/4068 | R01_cb8564_c17839/f2p0/4068 | R01_cb8564_c17839/f2p0/4068 |
| R01_cb8564_c3602/flp0/3523  | NA                          | R01_cb8564_c3602/flp0/3523  | NA                          | NA                          |
| R01_cb16383_c3/flp0/1718    | NA                          | R01_cb16383_c3/flp0/1718    | NA                          | R01_cb16383_c3/flp0/1718    |
| R01_cb8564_c52810/flp0/3803 | NA                          | R01_cb8564_c52810/flp0/3803 | NA                          | R01_cb8564_c52810/flp0/3803 |
| R01_cb11662_c2/flp0/1096    | NA                          | NA                          | NA                          | R01_cb11662_c2/flp0/1096    |
| R01_cb8564_c80050/flp0/2530 | NA                          | NA                          | NA                          | R01_cb8564_c80050/flp0/2530 |
| R01_cb14940_c4/flp0/663     | NA                          | R01_cb14940_c4/flp0/663     | R01_cb14940_c4/flp0/663     | R01_cb14940_c4/flp0/663     |
| R01_cb10600_c2/flp0/838     | NA                          | NA                          | NA                          | R01_cb10600_c2/flp0/838     |
| R01_cb2674_c25/flp0/2966    | NA                          | R01_cb2674_c25/flp0/2966    | NA                          | R01_cb2674_c25/flp0/2966    |
| R01_cb14125_c124/flp0/597   | NA                          | R01_cb14125_c124/flp0/597   | R01_cb14125_c124/flp0/597   | NA                          |
| R01_cb2520_c11/flp0/3186    | NA                          | R01_cb2520_c11/flp0/3186    | NA                          | NA                          |
| R01_cb8564_c14666/flp0/2420 | NA                          | R01_cb8564_c14666/flp0/2420 | NA                          | NA                          |
| R01_cb176_c2/flp0/2483      | NA                          | NA                          | NA                          | R01_cb176_c2/flp0/2483      |
| R01_cb3929_c5/flp0/2160     | R01_cb3929_c5/flp0/2160     | R01_cb3929_c5/flp0/2160     | NA                          | NA                          |
| R01_cb8279_c17/flp0/5208    | NA                          | NA                          | NA                          | R01_cb8279_c17/flp0/5208    |
| R01_cb11614_c1/flp0/2308    | NA                          | NA                          | NA                          | R01_cb11614_c1/flp0/2308    |
| R01_cb10541_c3/flp0/617     | R01_cb10541_c3/flp0/617     | R01_cb10541_c3/flp0/617     | R01_cb10541_c3/flp0/617     | R01_cb10541_c3/flp0/617     |



|                             |                             |                             |                             |                             |
|-----------------------------|-----------------------------|-----------------------------|-----------------------------|-----------------------------|
| R01_cb1905_c3/f2p0/2341     | NA                          | NA                          | R01_cb1905_c3/f2p0/2341     | NA                          |
| R01_cb5658_c3/f1p0/2974     | NA                          | R01_cb5658_c3/f1p0/2974     | NA                          | R01_cb5658_c3/f1p0/2974     |
| R01_cb7708_c3/f1p0/2328     | NA                          | R01_cb7708_c3/f1p0/2328     | NA                          | NA                          |
| R01_cb5117_c4/f1p0/837      | R01_cb5117_c4/f1p0/837      | R01_cb5117_c4/f1p0/837      | R01_cb5117_c4/f1p0/837      | R01_cb5117_c4/f1p0/837      |
| R01_cb4679_c4/f1p0/1131     | NA                          | R01_cb4679_c4/f1p0/1131     | NA                          | NA                          |
| R01_cb12775_c1/f2p1/1261    | NA                          | NA                          | NA                          | R01_cb12775_c1/f2p1/1261    |
| R01_cb4178_c1/f1p0/3412     | NA                          | R01_cb4178_c1/f1p0/3412     | NA                          | R01_cb4178_c1/f1p0/3412     |
| R01_cb3426_c4/f1p0/3628     | NA                          | NA                          | NA                          | R01_cb3426_c4/f1p0/3628     |
| R01_cb1077_c42/f1p0/2003    | NA                          | NA                          | NA                          | R01_cb1077_c42/f1p0/2003    |
| R01_cb1248_c3/f1p0/3470     | NA                          | NA                          | NA                          | R01_cb1248_c3/f1p0/3470     |
| R01_cb2771_c12/f1p1/2633    | NA                          | NA                          | NA                          | R01_cb2771_c12/f1p1/2633    |
| R01_cb17266_c19/f1p0/1545   | R01_cb17266_c19/f1p0/1545   | R01_cb17266_c19/f1p0/1545   | NA                          | R01_cb17266_c19/f1p0/1545   |
| R01_cb7441_c10/f1p0/587     | NA                          | R01_cb7441_c10/f1p0/587     | R01_cb7441_c10/f1p0/587     | R01_cb7441_c10/f1p0/587     |
| R01_cb9784_c1/f1p0/2033     | R01_cb9784_c1/f1p0/2033     | R01_cb9784_c1/f1p0/2033     | R01_cb9784_c1/f1p0/2033     | R01_cb9784_c1/f1p0/2033     |
| R01_cb8564_c33818/f3p0/2136 | R01_cb8564_c33818/f3p0/2136 | R01_cb8564_c33818/f3p0/2136 | R01_cb8564_c33818/f3p0/2136 | R01_cb8564_c33818/f3p0/2136 |
| R01_cb17756_c24/f1p0/770    | R01_cb17756_c24/f1p0/770    | R01_cb17756_c24/f1p0/770    | R01_cb17756_c24/f1p0/770    | R01_cb17756_c24/f1p0/770    |
| R01_cb6680_c3/f1p0/2510     | NA                          | NA                          | NA                          | R01_cb6680_c3/f1p0/2510     |
| R01_cb7010_c16/f1p1/1971    | NA                          | NA                          | NA                          | R01_cb7010_c16/f1p1/1971    |
| R01_cb12589_c1/f2p0/1003    | NA                          | NA                          | NA                          | R01_cb12589_c1/f2p0/1003    |
| R01_cb8564_c54057/f1p0/3595 | NA                          | R01_cb8564_c54057/f1p0/3595 | NA                          | R01_cb8564_c54057/f1p0/3595 |
| R01_cb17162_c0/f2p0/565     | NA                          | NA                          | NA                          | R01_cb17162_c0/f2p0/565     |
| R01_cb2851_c2/f1p0/2309     | NA                          | NA                          | NA                          | R01_cb2851_c2/f1p0/2309     |
| R01_cb1388_c37/f1p0/5272    | NA                          | NA                          | NA                          | R01_cb1388_c37/f1p0/5272    |
| R01_cb8564_c1021/f1p0/2810  | NA                          | R01_cb8564_c1021/f1p0/2810  | NA                          | NA                          |
| R01_cb11009_c0/f2p0/525     | R01_cb11009_c0/f2p0/525     | R01_cb11009_c0/f2p0/525     | R01_cb11009_c0/f2p0/525     | R01_cb11009_c0/f2p0/525     |

|                             |                             |                             |                             |                          |
|-----------------------------|-----------------------------|-----------------------------|-----------------------------|--------------------------|
| R01_cb843_c4/flp1/2300      | NA                          | NA                          | NA                          | R01_cb843_c4/flp1/2300   |
| R01_cb737_c56/flp0/2325     | R01_cb737_c56/flp0/2325     | R01_cb737_c56/flp0/2325     | R01_cb737_c56/flp0/2325     | NA                       |
| R01_cb3680_c3/flp0/3095     | NA                          | NA                          | NA                          | R01_cb3680_c3/flp0/3095  |
| R01_cb8564_c71559/flp0/4717 | R01_cb8564_c71559/flp0/4717 | R01_cb8564_c71559/flp0/4717 | R01_cb8564_c71559/flp0/4717 | NA                       |
| R01_cb14166_c3/flp0/583     | R01_cb14166_c3/flp0/583     | R01_cb14166_c3/flp0/583     | R01_cb14166_c3/flp0/583     | R01_cb14166_c3/flp0/583  |
| R01_cb18350_c1/flp0/1195    | NA                          | NA                          | NA                          | R01_cb18350_c1/flp0/1195 |
| R01_cb1228_c39/flp0/2553    | NA                          | NA                          | NA                          | R01_cb1228_c39/flp0/2553 |
| R01_cb8564_c15388/flp0/3616 | NA                          | R01_cb8564_c15388/flp0/3616 | NA                          | NA                       |
| R01_cb17951_c1/flp0/1268    | NA                          | NA                          | NA                          | R01_cb17951_c1/flp0/1268 |
| R01_cb7814_c13/f4p1/2570    | NA                          | NA                          | NA                          | R01_cb7814_c13/f4p1/2570 |
| R01_cb6238_c15/flp0/2699    | NA                          | R01_cb6238_c15/flp0/2699    | NA                          | NA                       |
| R01_cb12577_c4/flp0/447     | R01_cb12577_c4/flp0/447     | R01_cb12577_c4/flp0/447     | R01_cb12577_c4/flp0/447     | R01_cb12577_c4/flp0/447  |
| R01_cb7087_c7/flp0/1773     | NA                          | NA                          | NA                          | R01_cb7087_c7/flp0/1773  |
| R01_cb6845_c19/flp0/2408    | NA                          | NA                          | NA                          | R01_cb6845_c19/flp0/2408 |
| R01_cb12328_c3/flp1/1591    | NA                          | NA                          | NA                          | R01_cb12328_c3/flp1/1591 |
| R01_cb14596_c1/flp0/1482    | NA                          | R01_cb14596_c1/flp0/1482    | R01_cb14596_c1/flp0/1482    | R01_cb14596_c1/flp0/1482 |
| R01_cb15157_c4/flp1/895     | NA                          | R01_cb15157_c4/flp1/895     | NA                          | NA                       |
| R01_cb13767_c8/flp0/429     | R01_cb13767_c8/flp0/429     | R01_cb13767_c8/flp0/429     | NA                          | R01_cb13767_c8/flp0/429  |
| R01_cb10029_c1010/flp0/871  | NA                          | R01_cb10029_c1010/flp0/871  | NA                          | NA                       |
| R01_cb8981_c1/flp1/2166     | NA                          | NA                          | NA                          | R01_cb8981_c1/flp1/2166  |
| R01_cb5297_c3/flp0/2341     | R01_cb5297_c3/flp0/2341     | R01_cb5297_c3/flp0/2341     | NA                          | NA                       |
| R01_cb13834_c4/flp0/1110    | NA                          | R01_cb13834_c4/flp0/1110    | NA                          | NA                       |
| R01_cb14425_c0/f6p0/630     | NA                          | NA                          | NA                          | R01_cb14425_c0/f6p0/630  |
| R01_cb6534_c2/flp0/2807     | NA                          | R01_cb6534_c2/flp0/2807     | NA                          | NA                       |
| R01_cb10263_c2/flp0/3546    | NA                          | R01_cb10263_c2/flp0/3546    | NA                          | NA                       |

|                             |                            |                            |                            |                             |
|-----------------------------|----------------------------|----------------------------|----------------------------|-----------------------------|
| R01_cb12871_c5/flp0/463     | R01_cb12871_c5/flp0/463    | R01_cb12871_c5/flp0/463    | NA                         | R01_cb12871_c5/flp0/463     |
| R01_cb10880_c9/f2p1/777     | NA                         | NA                         | NA                         | R01_cb10880_c9/f2p1/777     |
| R01_cb15773_c2/flp0/524     | R01_cb15773_c2/flp0/524    | R01_cb15773_c2/flp0/524    | NA                         | NA                          |
| R01_cb6170_c4/f2p2/2886     | NA                         | NA                         | NA                         | R01_cb6170_c4/f2p2/2886     |
| R01_cb10815_c6/flp0/607     | R01_cb10815_c6/flp0/607    | R01_cb10815_c6/flp0/607    | R01_cb10815_c6/flp0/607    | R01_cb10815_c6/flp0/607     |
| R01_cb18456_c7386/flp0/866  | R01_cb18456_c7386/flp0/866 | R01_cb18456_c7386/flp0/866 | R01_cb18456_c7386/flp0/866 | R01_cb18456_c7386/flp0/866  |
| R01_cb3774_c17/flp1/3530    | NA                         | NA                         | NA                         | R01_cb3774_c17/flp1/3530    |
| R01_cb9154_c8/flp0/1641     | NA                         | NA                         | NA                         | R01_cb9154_c8/flp0/1641     |
| R01_cb8975_c6/flp0/2082     | NA                         | NA                         | NA                         | R01_cb8975_c6/flp0/2082     |
| R01_cb3017_c6/flp0/2424     | R01_cb3017_c6/flp0/2424    | R01_cb3017_c6/flp0/2424    | R01_cb3017_c6/flp0/2424    | R01_cb3017_c6/flp0/2424     |
| R01_cb12480_c10/flp0/514    | R01_cb12480_c10/flp0/514   | R01_cb12480_c10/flp0/514   | R01_cb12480_c10/flp0/514   | NA                          |
| R01_cb15371_c13/f46p0/657   | NA                         | R01_cb15371_c13/f46p0/657  | NA                         | NA                          |
| R01_cb18456_c7377/flp1/599  | NA                         | NA                         | NA                         | R01_cb18456_c7377/flp1/599  |
| R01_cb15789_c0/flp0/1295    | NA                         | R01_cb15789_c0/flp0/1295   | R01_cb15789_c0/flp0/1295   | NA                          |
| R01_cb8564_c70600/flp2/3373 | NA                         | NA                         | NA                         | R01_cb8564_c70600/flp2/3373 |
| R01_cb15869_c0/flp2/968     | R01_cb15869_c0/flp2/968    | NA                         | NA                         | NA                          |
| R01_cb13696_c2/flp0/1495    | NA                         | NA                         | NA                         | R01_cb13696_c2/flp0/1495    |
| R01_cb10970_c10/flp0/1276   | NA                         | NA                         | NA                         | R01_cb10970_c10/flp0/1276   |
| R01_cb11744_c2/flp0/977     | NA                         | NA                         | NA                         | R01_cb11744_c2/flp0/977     |
| R01_cb12575_c3/flp0/781     | NA                         | NA                         | NA                         | R01_cb12575_c3/flp0/781     |
| R01_cb1228_c29/flp0/2586    | NA                         | NA                         | NA                         | R01_cb1228_c29/flp0/2586    |
| R01_cb10060_c2/flp0/2699    | NA                         | R01_cb10060_c2/flp0/2699   | NA                         | NA                          |
| R01_cb18456_c7433/flp0/585  | NA                         | R01_cb18456_c7433/flp0/585 | R01_cb18456_c7433/flp0/585 | R01_cb18456_c7433/flp0/585  |
| R01_cb8089_c1/flp0/2464     | NA                         | R01_cb8089_c1/flp0/2464    | R01_cb8089_c1/flp0/2464    | NA                          |
| R01_cb11507_c1/flp0/3442    | NA                         | NA                         | NA                         | R01_cb11507_c1/flp0/3442    |
| R01_cb5183_c36/flp0/2369    | NA                         | NA                         | NA                         | R01_cb5183_c36/flp0/2369    |

|                             |                             |                             |                             |                             |
|-----------------------------|-----------------------------|-----------------------------|-----------------------------|-----------------------------|
| R01_cb17690_c0/f2p0/446     | R01_cb17690_c0/f2p0/446     | R01_cb17690_c0/f2p0/446     | R01_cb17690_c0/f2p0/446     | R01_cb17690_c0/f2p0/446     |
| R01_cb8080_c0/f2p0/2374     | NA                          | NA                          | R01_cb8080_c0/f2p0/2374     | NA                          |
| R01_cb2161_c13/f1p0/5935    | NA                          | NA                          | NA                          | R01_cb2161_c13/f1p0/5935    |
| R01_cb593_c9/f1p0/4075      | NA                          | R01_cb593_c9/f1p0/4075      | NA                          | NA                          |
| R01_cb15149_c3/f1p0/886     | R01_cb15149_c3/f1p0/886     | R01_cb15149_c3/f1p0/886     | NA                          | NA                          |
| R01_cb8279_c12/f1p0/2210    | NA                          | NA                          | NA                          | R01_cb8279_c12/f1p0/2210    |
| R01_cb18409_c94/f1p0/521    | R01_cb18409_c94/f1p0/521    | R01_cb18409_c94/f1p0/521    | R01_cb18409_c94/f1p0/521    | R01_cb18409_c94/f1p0/521    |
| R01_cb18610_c5/f1p0/1491    | NA                          | NA                          | NA                          | R01_cb18610_c5/f1p0/1491    |
| R01_cb4916_c7/f1p0/2248     | NA                          | NA                          | NA                          | R01_cb4916_c7/f1p0/2248     |
| R01_cb15018_c2/f1p1/645     | NA                          | R01_cb15018_c2/f1p1/645     | R01_cb15018_c2/f1p1/645     | R01_cb15018_c2/f1p1/645     |
| R01_cb15251_c0/f2p0/1736    | NA                          | NA                          | NA                          | R01_cb15251_c0/f2p0/1736    |
| R01_cb5952_c2/f1p0/2152     | NA                          | NA                          | NA                          | R01_cb5952_c2/f1p0/2152     |
| R01_cb13137_c3/f2p0/1214    | NA                          | R01_cb13137_c3/f2p0/1214    | NA                          | NA                          |
| R01_cb2644_c43/f1p0/492     | R01_cb2644_c43/f1p0/492     | R01_cb2644_c43/f1p0/492     | R01_cb2644_c43/f1p0/492     | R01_cb2644_c43/f1p0/492     |
| R01_cb8564_c44645/f2p0/2348 | R01_cb8564_c44645/f2p0/2348 | R01_cb8564_c44645/f2p0/2348 | R01_cb8564_c44645/f2p0/2348 | R01_cb8564_c44645/f2p0/2348 |
| R01_cb15891_c4/f1p0/1791    | NA                          | R01_cb15891_c4/f1p0/1791    | NA                          | NA                          |
| R01_cb3639_c0/f1p0/3568     | NA                          | R01_cb3639_c0/f1p0/3568     | NA                          | R01_cb3639_c0/f1p0/3568     |
| R01_cb16966_c0/f2p0/549     | NA                          | R01_cb16966_c0/f2p0/549     | NA                          | NA                          |
| R01_cb1675_c0/f4p0/3209     | NA                          | NA                          | NA                          | R01_cb1675_c0/f4p0/3209     |
| R01_cb8564_c74023/f1p0/2120 | NA                          | R01_cb8564_c74023/f1p0/2120 | R01_cb8564_c74023/f1p0/2120 | R01_cb8564_c74023/f1p0/2120 |
| R01_cb8564_c1414/f1p0/2727  | NA                          | R01_cb8564_c1414/f1p0/2727  | NA                          | NA                          |
| R01_cb8564_c90385/f1p0/3230 | NA                          | R01_cb8564_c90385/f1p0/3230 | NA                          | R01_cb8564_c90385/f1p0/3230 |
| R01_cb18192_c9/f1p0/987     | NA                          | R01_cb18192_c9/f1p0/987     | R01_cb18192_c9/f1p0/987     | R01_cb18192_c9/f1p0/987     |
| R01_cb17421_c0/f1p0/552     | NA                          | R01_cb17421_c0/f1p0/552     | NA                          | NA                          |
| R01_cb10402_c6/f1p0/686     | NA                          | R01_cb10402_c6/f1p0/686     | NA                          | NA                          |

|                             |                             |                             |                             |                             |
|-----------------------------|-----------------------------|-----------------------------|-----------------------------|-----------------------------|
| R01_cb8564_c80418/f1p0/3809 | R01_cb8564_c80418/f1p0/3809 | R01_cb8564_c80418/f1p0/3809 | R01_cb8564_c80418/f1p0/3809 | R01_cb8564_c80418/f1p0/3809 |
| R01_cb8564_c16861/f1p0/2967 | NA                          | R01_cb8564_c16861/f1p0/2967 | NA                          | R01_cb8564_c16861/f1p0/2967 |
| R01_cb8564_c4621/f1p0/3187  | NA                          | R01_cb8564_c4621/f1p0/3187  | R01_cb8564_c4621/f1p0/3187  | R01_cb8564_c4621/f1p0/3187  |
| R01_cb405_c17/f1p0/2482     | NA                          | R01_cb405_c17/f1p0/2482     | NA                          | NA                          |
| R01_cb8564_c88600/f1p0/3686 | NA                          | R01_cb8564_c88600/f1p0/3686 | NA                          | NA                          |
| R01_cb10021_c3/f1p0/2850    | R01_cb10021_c3/f1p0/2850    | R01_cb10021_c3/f1p0/2850    | NA                          | NA                          |
| R01_cb18733_c1/f1p0/521     | NA                          | R01_cb18733_c1/f1p0/521     | R01_cb18733_c1/f1p0/521     | R01_cb18733_c1/f1p0/521     |
| R01_cb18456_c7828/f2p1/635  | NA                          | NA                          | R01_cb18456_c7828/f2p1/635  | R01_cb18456_c7828/f2p1/635  |
| R01_cb1068_c3/f1p0/2777     | NA                          | R01_cb1068_c3/f1p0/2777     | NA                          | NA                          |
| R01_cb2378_c11/f1p1/4562    | NA                          | NA                          | NA                          | R01_cb2378_c11/f1p1/4562    |
| R01_cb4363_c1/f2p0/2715     | R01_cb4363_c1/f2p0/2715     | R01_cb4363_c1/f2p0/2715     | NA                          | R01_cb4363_c1/f2p0/2715     |
| R01_cb11673_c1/f1p0/2191    | NA                          | R01_cb11673_c1/f1p0/2191    | NA                          | NA                          |
| R01_cb17582_c2/f1p0/544     | R01_cb17582_c2/f1p0/544     | R01_cb17582_c2/f1p0/544     | R01_cb17582_c2/f1p0/544     | R01_cb17582_c2/f1p0/544     |
| R01_cb14209_c1/f1p0/864     | NA                          | R01_cb14209_c1/f1p0/864     | R01_cb14209_c1/f1p0/864     | R01_cb14209_c1/f1p0/864     |
| R01_cb6582_c20/f1p0/1979    | R01_cb6582_c20/f1p0/1979    | R01_cb6582_c20/f1p0/1979    | R01_cb6582_c20/f1p0/1979    | R01_cb6582_c20/f1p0/1979    |
| R01_cb7687_c7/f1p0/2442     | NA                          | NA                          | NA                          | R01_cb7687_c7/f1p0/2442     |
| R01_cb8564_c82173/f1p0/3046 | NA                          | R01_cb8564_c82173/f1p0/3046 | NA                          | NA                          |
| R01_cb14656_c4/f1p0/551     | R01_cb14656_c4/f1p0/551     | R01_cb14656_c4/f1p0/551     | NA                          | NA                          |
| R01_cb14077_c2/f1p0/876     | NA                          | R01_cb14077_c2/f1p0/876     | NA                          | NA                          |
| R01_cb2073_c2/f1p0/5178     | NA                          | NA                          | NA                          | R01_cb2073_c2/f1p0/5178     |
| R01_cb4169_c3/f1p0/3414     | NA                          | NA                          | NA                          | R01_cb4169_c3/f1p0/3414     |
| R01_cb16960_c1/f2p0/553     | NA                          | R01_cb16960_c1/f2p0/553     | NA                          | R01_cb16960_c1/f2p0/553     |
| R01_cb16646_c4/f1p0/920     | NA                          | NA                          | NA                          | R01_cb16646_c4/f1p0/920     |
| R01_cb14797_c0/f2p0/735     | NA                          | R01_cb14797_c0/f2p0/735     | NA                          | NA                          |
| R01_cb17937_c0/f2p0/1087    | NA                          | NA                          | R01_cb17937_c0/f2p0/1087    | R01_cb17937_c0/f2p0/1087    |

|                                  |                            |                             |                            |                                  |
|----------------------------------|----------------------------|-----------------------------|----------------------------|----------------------------------|
| R01_cb11885_c4/flp0/1695         | NA                         | R01_cb11885_c4/flp0/1695    | NA                         | NA                               |
| R01_cb527_c2/flp0/2024           | NA                         | R01_cb527_c2/flp0/2024      | NA                         | NA                               |
| R01_cb8564_c20280/flp0/2622      | NA                         | R01_cb8564_c20280/flp0/2622 | NA                         | NA                               |
| R01_cb18759_c1/flp0/3589         | R01_cb18759_c1/flp0/3589   | R01_cb18759_c1/flp0/3589    | NA                         | NA                               |
| R01_cb16850_c1/flp0/781          | NA                         | R01_cb16850_c1/flp0/781     | R01_cb16850_c1/flp0/781    | NA                               |
| R01_cb14971_c11/flp0/594         | R01_cb14971_c11/flp0/594   | R01_cb14971_c11/flp0/594    | R01_cb14971_c11/flp0/594   | R01_cb14971_c11/flp0/594         |
| R01_cb8564_c9931/f2p0/2258       | NA                         | NA                          | NA                         | R01_cb8564_c9931/f2p0/2258       |
| R01_cb12504_c4/flp0/1675         | NA                         | R01_cb12504_c4/flp0/1675    | NA                         | R01_cb12504_c4/flp0/1675         |
| R01_cb3412_c1/flp0/2908          | NA                         | R01_cb3412_c1/flp0/2908     | NA                         | NA                               |
| R01_cb5159_c11/flp0/2222         | NA                         | NA                          | NA                         | R01_cb5159_c11/flp0/2222         |
| R01_cb6081_c4/flp0/2311          | NA                         | R01_cb6081_c4/flp0/2311     | R01_cb6081_c4/flp0/2311    | NA                               |
| R01_cb4113_c2/flp1/3393          | NA                         | R01_cb4113_c2/flp1/3393     | NA                         | NA                               |
| R01_cb4603_c0/f2p1/1242          | NA                         | NA                          | NA                         | R01_cb4603_c0/f2p1/1242          |
| R01_cb8564_c86444/flp0/2782      | NA                         | R01_cb8564_c86444/flp0/2782 | NA                         | R01_cb8564_c86444/flp0/2782      |
| R01_cb7079_c5/flp0/2517          | NA                         | NA                          | NA                         | R01_cb7079_c5/flp0/2517          |
| R01_cb11671_c1/flp0/4005         | NA                         | R01_cb11671_c1/flp0/4005    | NA                         | NA                               |
| R01_cb18456_c7247/flp0/534       | R01_cb18456_c7247/flp0/534 | R01_cb18456_c7247/flp0/534  | R01_cb18456_c7247/flp0/534 | R01_cb18456_c7247/flp0/534       |
| R01_cb8564_c128819/flp0/246<br>1 | NA                         | NA                          | NA                         | R01_cb8564_c128819/flp0/246<br>1 |
| R01_cb11439_c1/flp0/2628         | NA                         | R01_cb11439_c1/flp0/2628    | R01_cb11439_c1/flp0/2628   | NA                               |
| R01_cb18456_c6881/flp0/854       | NA                         | R01_cb18456_c6881/flp0/854  | NA                         | NA                               |
| R01_cb15175_c1/flp0/868          | NA                         | NA                          | NA                         | R01_cb15175_c1/flp0/868          |
| R01_cb2095_c10/flp1/2150         | NA                         | NA                          | NA                         | R01_cb2095_c10/flp1/2150         |
| R01_cb10015_c543/flp0/867        | NA                         | R01_cb10015_c543/flp0/867   | NA                         | NA                               |
| R01_cb15045_c5/flp1/794          | NA                         | R01_cb15045_c5/flp1/794     | NA                         | R01_cb15045_c5/flp1/794          |
| R01_cb18473_c1/flp0/1627         | NA                         | NA                          | NA                         | R01_cb18473_c1/flp0/1627         |

|                             |                          |                             |                             |                             |
|-----------------------------|--------------------------|-----------------------------|-----------------------------|-----------------------------|
| R01_cb960_c3/flp0/4686      | NA                       | R01_cb960_c3/flp0/4686      | NA                          | R01_cb960_c3/flp0/4686      |
| R01_cb15514_c0/flp0/1028    | R01_cb15514_c0/flp0/1028 | R01_cb15514_c0/flp0/1028    | NA                          | R01_cb15514_c0/flp0/1028    |
| R01_cb8564_c4473/f2p0/4098  | NA                       | NA                          | R01_cb8564_c4473/f2p0/4098  | R01_cb8564_c4473/f2p0/4098  |
| R01_cb12722_c22/flp2/1519   | NA                       | NA                          | NA                          | R01_cb12722_c22/flp2/1519   |
| R01_cb5850_c1/flp0/3457     | NA                       | R01_cb5850_c1/flp0/3457     | R01_cb5850_c1/flp0/3457     | R01_cb5850_c1/flp0/3457     |
| R01_cb6427_c0/flp0/2858     | NA                       | NA                          | NA                          | R01_cb6427_c0/flp0/2858     |
| R01_cb12612_c1/flp0/1781    | NA                       | R01_cb12612_c1/flp0/1781    | NA                          | NA                          |
| R01_cb11743_c3/flp0/2319    | NA                       | R01_cb11743_c3/flp0/2319    | NA                          | NA                          |
| R01_cb4953_c3/flp0/3107     | NA                       | NA                          | NA                          | R01_cb4953_c3/flp0/3107     |
| R01_cb8564_c69317/f2p0/2565 | NA                       | R01_cb8564_c69317/f2p0/2565 | NA                          | NA                          |
| R01_cb6286_c14/flp0/1844    | NA                       | NA                          | NA                          | R01_cb6286_c14/flp0/1844    |
| R01_cb8537_c15/flp0/985     | NA                       | NA                          | NA                          | R01_cb8537_c15/flp0/985     |
| R01_cb12784_c3/flp0/1147    | NA                       | R01_cb12784_c3/flp0/1147    | NA                          | R01_cb12784_c3/flp0/1147    |
| R01_cb5852_c1/flp0/2994     | NA                       | R01_cb5852_c1/flp0/2994     | NA                          | NA                          |
| R01_cb8564_c10432/flp0/2146 | NA                       | R01_cb8564_c10432/flp0/2146 | NA                          | R01_cb8564_c10432/flp0/2146 |
| R01_cb8564_c122122/flp0/249 | NA                       | R01_cb8564_c122122/flp0/249 | R01_cb8564_c122122/flp0/249 | R01_cb8564_c122122/flp0/249 |
| 5                           | NA                       | 5                           | 5                           | 5                           |
| R01_cb5595_c14/flp0/2659    | NA                       | NA                          | NA                          | R01_cb5595_c14/flp0/2659    |
| R01_cb8779_c6/flp0/3403     | NA                       | R01_cb8779_c6/flp0/3403     | NA                          | R01_cb8779_c6/flp0/3403     |
| R01_cb2107_c7/flp0/2748     | NA                       | R01_cb2107_c7/flp0/2748     | NA                          | NA                          |
| R01_cb4147_c23/flp0/2431    | NA                       | R01_cb4147_c23/flp0/2431    | NA                          | NA                          |
| R01_cb14283_c5/flp0/795     | NA                       | R01_cb14283_c5/flp0/795     | R01_cb14283_c5/flp0/795     | R01_cb14283_c5/flp0/795     |
| R01_cb8660_c8/flp0/2113     | NA                       | NA                          | NA                          | R01_cb8660_c8/flp0/2113     |
| R01_cb9888_c5/flp0/1422     | NA                       | R01_cb9888_c5/flp0/1422     | NA                          | NA                          |
| R01_cb9700_c6/flp0/1641     | NA                       | R01_cb9700_c6/flp0/1641     | NA                          | NA                          |
| R01_cb9367_c3/flp0/1075     | NA                       | R01_cb9367_c3/flp0/1075     | NA                          | R01_cb9367_c3/flp0/1075     |

|                                  |                            |                                  |                             |                             |
|----------------------------------|----------------------------|----------------------------------|-----------------------------|-----------------------------|
| R01_cb18197_c1/flp0/559          | NA                         | R01_cb18197_c1/flp0/559          | R01_cb18197_c1/flp0/559     | R01_cb18197_c1/flp0/559     |
| R01_cb12418_c0/flp0/554          | R01_cb12418_c0/flp0/554    | R01_cb12418_c0/flp0/554          | R01_cb12418_c0/flp0/554     | R01_cb12418_c0/flp0/554     |
| R01_cb8564_c74520/flp0/3076      | NA                         | NA                               | NA                          | R01_cb8564_c74520/flp0/3076 |
| R01_cb8564_c92111/flp0/2633      | NA                         | R01_cb8564_c92111/flp0/2633      | R01_cb8564_c92111/flp0/2633 | NA                          |
| R01_cb4536_c1/flp1/3272          | NA                         | NA                               | NA                          | R01_cb4536_c1/flp1/3272     |
| R01_cb8569_c11/flp0/1064         | NA                         | R01_cb8569_c11/flp0/1064         | NA                          | NA                          |
| R01_cb17576_c1/f2p0/840          | NA                         | NA                               | R01_cb17576_c1/f2p0/840     | R01_cb17576_c1/f2p0/840     |
| R01_cb8564_c122105/flp0/284<br>5 | NA                         | R01_cb8564_c122105/flp0/284<br>5 | NA                          | NA                          |
| R01_cb2845_c30/flp3/3567         | NA                         | NA                               | NA                          | R01_cb2845_c30/flp3/3567    |
| R01_cb8564_c34291/flp0/4647      | NA                         | NA                               | NA                          | R01_cb8564_c34291/flp0/4647 |
| R01_cb17734_c0/flp0/892          | NA                         | NA                               | NA                          | R01_cb17734_c0/flp0/892     |
| R01_cb8564_c10819/flp1/3887      | NA                         | R01_cb8564_c10819/flp1/3887      | R01_cb8564_c10819/flp1/3887 | NA                          |
| R01_cb8564_c83183/flp0/4016      | NA                         | R01_cb8564_c83183/flp0/4016      | NA                          | NA                          |
| R01_cb4821_c6/flp0/3180          | NA                         | R01_cb4821_c6/flp0/3180          | NA                          | NA                          |
| R01_cb8669_c5/flp0/1843          | NA                         | R01_cb8669_c5/flp0/1843          | R01_cb8669_c5/flp0/1843     | NA                          |
| R01_cb17274_c1/flp0/880          | NA                         | NA                               | R01_cb17274_c1/flp0/880     | R01_cb17274_c1/flp0/880     |
| R01_cb8564_c2686/flp1/2051       | NA                         | R01_cb8564_c2686/flp1/2051       | NA                          | NA                          |
| R01_cb8900_c0/flp0/2223          | NA                         | NA                               | NA                          | R01_cb8900_c0/flp0/2223     |
| R01_cb5736_c5/flp0/2180          | NA                         | NA                               | NA                          | R01_cb5736_c5/flp0/2180     |
| R01_cb2997_c0/f3p0/3489          | NA                         | NA                               | NA                          | R01_cb2997_c0/f3p0/3489     |
| R01_cb8254_c3/flp0/2422          | NA                         | NA                               | NA                          | R01_cb8254_c3/flp0/2422     |
| R01_cb16999_c0/flp0/933          | R01_cb16999_c0/flp0/933    | R01_cb16999_c0/flp0/933          | NA                          | NA                          |
| R01_cb15907_c1/flp0/696          | R01_cb15907_c1/flp0/696    | R01_cb15907_c1/flp0/696          | NA                          | R01_cb15907_c1/flp0/696     |
| R01_cb8564_c2470/flp0/3910       | NA                         | R01_cb8564_c2470/flp0/3910       | NA                          | NA                          |
| R01_cb18456_c6431/flp0/500       | R01_cb18456_c6431/flp0/500 | R01_cb18456_c6431/flp0/500       | NA                          | NA                          |



|                             |                            |                             |                             |                             |
|-----------------------------|----------------------------|-----------------------------|-----------------------------|-----------------------------|
| R01_cb10024_c285/flp0/656   | NA                         | NA                          | R01_cb10024_c285/flp0/656   | NA                          |
| R01_cb4371_c4/flp0/2305     | NA                         | R01_cb4371_c4/flp0/2305     | NA                          | NA                          |
| R01_cb8942_c23/flp2/3072    | NA                         | R01_cb8942_c23/flp2/3072    | NA                          | NA                          |
| R01_cb15907_c0/flp0/713     | NA                         | R01_cb15907_c0/flp0/713     | NA                          | R01_cb15907_c0/flp0/713     |
| R01_cb9448_c8/flp1/1865     | NA                         | NA                          | NA                          | R01_cb9448_c8/flp1/1865     |
| R01_cb16034_c2/flp0/390     | R01_cb16034_c2/flp0/390    | R01_cb16034_c2/flp0/390     | R01_cb16034_c2/flp0/390     | R01_cb16034_c2/flp0/390     |
| R01_cb11030_c0/flp0/1209    | NA                         | R01_cb11030_c0/flp0/1209    | NA                          | NA                          |
| R01_cb13686_c11/flp1/1157   | NA                         | R01_cb13686_c11/flp1/1157   | NA                          | NA                          |
| R01_cb18723_c1/flp0/341     | R01_cb18723_c1/flp0/341    | R01_cb18723_c1/flp0/341     | R01_cb18723_c1/flp0/341     | R01_cb18723_c1/flp0/341     |
| R01_cb4469_c9/flp0/2235     | NA                         | NA                          | NA                          | R01_cb4469_c9/flp0/2235     |
| R01_cb9410_c5/f2p1/2049     | NA                         | NA                          | NA                          | R01_cb9410_c5/f2p1/2049     |
| R01_cb2878_c5/flp0/3337     | NA                         | R01_cb2878_c5/flp0/3337     | NA                          | NA                          |
| R01_cb16293_c10/flp0/865    | NA                         | NA                          | R01_cb16293_c10/flp0/865    | R01_cb16293_c10/flp0/865    |
| R01_cb723_c2/flp0/3494      | R01_cb723_c2/flp0/3494     | R01_cb723_c2/flp0/3494      | NA                          | NA                          |
| R01_cb18456_c1509/f3p0/524  | R01_cb18456_c1509/f3p0/524 | R01_cb18456_c1509/f3p0/524  | R01_cb18456_c1509/f3p0/524  | R01_cb18456_c1509/f3p0/524  |
| R01_cb17620_c0/flp0/1645    | R01_cb17620_c0/flp0/1645   | R01_cb17620_c0/flp0/1645    | NA                          | NA                          |
| R01_cb8564_c73046/flp0/2679 | NA                         | NA                          | NA                          | R01_cb8564_c73046/flp0/2679 |
| R01_cb16153_c9/f2p0/690     | NA                         | NA                          | R01_cb16153_c9/f2p0/690     | R01_cb16153_c9/f2p0/690     |
| R01_cb2667_c4/flp0/2890     | NA                         | R01_cb2667_c4/flp0/2890     | NA                          | NA                          |
| R01_cb8564_c38564/f2p0/2549 | NA                         | R01_cb8564_c38564/f2p0/2549 | R01_cb8564_c38564/f2p0/2549 | R01_cb8564_c38564/f2p0/2549 |
| R01_cb8564_c90099/flp0/3063 | NA                         | R01_cb8564_c90099/flp0/3063 | NA                          | NA                          |
| R01_cb14675_c5/flp2/939     | R01_cb14675_c5/flp2/939    | R01_cb14675_c5/flp2/939     | R01_cb14675_c5/flp2/939     | R01_cb14675_c5/flp2/939     |
| R01_cb17221_c3/flp0/1610    | NA                         | R01_cb17221_c3/flp0/1610    | NA                          | R01_cb17221_c3/flp0/1610    |
| R01_cb10390_c12/flp0/832    | NA                         | R01_cb10390_c12/flp0/832    | NA                          | NA                          |
| R01_cb15908_c2/flp0/1420    | NA                         | NA                          | NA                          | R01_cb15908_c2/flp0/1420    |
| R01_cb17381_c5/flp0/768     | NA                         | NA                          | NA                          | R01_cb17381_c5/flp0/768     |

|                             |                          |                             |                             |                             |
|-----------------------------|--------------------------|-----------------------------|-----------------------------|-----------------------------|
| R01_cb11843_c0/flp0/995     | NA                       | R01_cb11843_c0/flp0/995     | NA                          | NA                          |
| R01_cb4117_c6/flp1/1742     | NA                       | R01_cb4117_c6/flp1/1742     | NA                          | R01_cb4117_c6/flp1/1742     |
| R01_cb8564_c13302/f2p0/1920 | NA                       | R01_cb8564_c13302/f2p0/1920 | R01_cb8564_c13302/f2p0/1920 | R01_cb8564_c13302/f2p0/1920 |
| R01_cb6473_c13/flp0/1888    | NA                       | R01_cb6473_c13/flp0/1888    | NA                          | NA                          |
| R01_cb12698_c18/flp1/1108   | NA                       | R01_cb12698_c18/flp1/1108   | NA                          | NA                          |
| R01_cb12334_c1/flp0/444     | R01_cb12334_c1/flp0/444  | R01_cb12334_c1/flp0/444     | NA                          | NA                          |
| R01_cb2382_c6/flp1/5561     | NA                       | NA                          | NA                          | R01_cb2382_c6/flp1/5561     |
| R01_cb18456_c7207/flp0/606  | NA                       | R01_cb18456_c7207/flp0/606  | NA                          | NA                          |
| R01_cb6571_c1/flp0/2221     | NA                       | R01_cb6571_c1/flp0/2221     | NA                          | R01_cb6571_c1/flp0/2221     |
| R01_cb11064_c0/flp0/497     | NA                       | NA                          | NA                          | R01_cb11064_c0/flp0/497     |
| R01_cb10658_c6/flp0/3185    | R01_cb10658_c6/flp0/3185 | R01_cb10658_c6/flp0/3185    | NA                          | NA                          |
| R01_cb5893_c0/f3p0/507      | R01_cb5893_c0/f3p0/507   | R01_cb5893_c0/f3p0/507      | R01_cb5893_c0/f3p0/507      | R01_cb5893_c0/f3p0/507      |
| R01_cb2357_c8/flp0/2643     | NA                       | NA                          | NA                          | R01_cb2357_c8/flp0/2643     |
| R01_cb6602_c26/flp0/2955    | NA                       | R01_cb6602_c26/flp0/2955    | NA                          | R01_cb6602_c26/flp0/2955    |
| R01_cb11332_c2/flp0/1012    | NA                       | NA                          | NA                          | R01_cb11332_c2/flp0/1012    |
| R01_cb16762_c1/flp0/630     | NA                       | R01_cb16762_c1/flp0/630     | NA                          | NA                          |
| R01_cb13396_c4/flp0/1537    | NA                       | R01_cb13396_c4/flp0/1537    | R01_cb13396_c4/flp0/1537    | R01_cb13396_c4/flp0/1537    |
| R01_cb4469_c1/f2p0/1533     | NA                       | NA                          | NA                          | R01_cb4469_c1/f2p0/1533     |
| R01_cb18580_c0/flp0/1375    | NA                       | NA                          | R01_cb18580_c0/flp0/1375    | NA                          |
| R01_cb16424_c0/f2p0/830     | NA                       | R01_cb16424_c0/f2p0/830     | NA                          | R01_cb16424_c0/f2p0/830     |
| R01_cb10029_c92/flp7/800    | NA                       | R01_cb10029_c92/flp7/800    | NA                          | NA                          |
| R01_cb8564_c14881/flp1/2242 | NA                       | NA                          | NA                          | R01_cb8564_c14881/flp1/2242 |
| R01_cb8564_c89576/flp0/3861 | NA                       | NA                          | NA                          | R01_cb8564_c89576/flp0/3861 |
| R01_cb124_c24/flp0/3642     | NA                       | NA                          | NA                          | R01_cb124_c24/flp0/3642     |
| R01_cb14817_c1/flp0/1251    | NA                       | NA                          | R01_cb14817_c1/flp0/1251    | R01_cb14817_c1/flp0/1251    |
| R01_cb12176_c1/flp0/575     | NA                       | R01_cb12176_c1/flp0/575     | NA                          | R01_cb12176_c1/flp0/575     |

|                             |                            |                             |                            |                             |
|-----------------------------|----------------------------|-----------------------------|----------------------------|-----------------------------|
| R01_cb11363_c1/f1p0/4033    | NA                         | R01_cb11363_c1/f1p0/4033    | NA                         | NA                          |
| R01_cb8564_c978/f1p2/2552   | NA                         | R01_cb8564_c978/f1p2/2552   | NA                         | NA                          |
| R01_cb17542_c1/f1p0/655     | NA                         | R01_cb17542_c1/f1p0/655     | R01_cb17542_c1/f1p0/655    | R01_cb17542_c1/f1p0/655     |
| R01_cb3201_c81/f1p0/6719    | NA                         | R01_cb3201_c81/f1p0/6719    | NA                         | NA                          |
| R01_cb1097_c3/f1p0/4198     | NA                         | NA                          | NA                         | R01_cb1097_c3/f1p0/4198     |
| R01_cb4953_c0/f12p0/1594    | NA                         | NA                          | NA                         | R01_cb4953_c0/f12p0/1594    |
| R01_cb17556_c0/f1p0/1248    | NA                         | R01_cb17556_c0/f1p0/1248    | NA                         | NA                          |
| R01_cb763_c0/f2p0/4159      | NA                         | R01_cb763_c0/f2p0/4159      | R01_cb763_c0/f2p0/4159     | R01_cb763_c0/f2p0/4159      |
| R01_cb15552_c1/f2p0/942     | NA                         | NA                          | NA                         | R01_cb15552_c1/f2p0/942     |
| R01_cb822_c11/f1p1/2602     | NA                         | NA                          | NA                         | R01_cb822_c11/f1p1/2602     |
| R01_cb13186_c5/f1p0/637     | R01_cb13186_c5/f1p0/637    | R01_cb13186_c5/f1p0/637     | R01_cb13186_c5/f1p0/637    | NA                          |
| R01_cb18581_c0/f1p0/1050    | NA                         | NA                          | NA                         | R01_cb18581_c0/f1p0/1050    |
| R01_cb1333_c28/f1p0/2464    | R01_cb1333_c28/f1p0/2464   | R01_cb1333_c28/f1p0/2464    | R01_cb1333_c28/f1p0/2464   | R01_cb1333_c28/f1p0/2464    |
| R01_cb5659_c31/f1p1/2500    | NA                         | NA                          | NA                         | R01_cb5659_c31/f1p1/2500    |
| R01_cb15732_c0/f1p0/884     | NA                         | R01_cb15732_c0/f1p0/884     | NA                         | NA                          |
| R01_cb9552_c1/f4p0/1921     | NA                         | NA                          | NA                         | R01_cb9552_c1/f4p0/1921     |
| R01_cb16834_c1/f1p0/802     | NA                         | NA                          | NA                         | R01_cb16834_c1/f1p0/802     |
| R01_cb17347_c4/f1p0/498     | R01_cb17347_c4/f1p0/498    | R01_cb17347_c4/f1p0/498     | NA                         | R01_cb17347_c4/f1p0/498     |
| R01_cb8564_c83266/f1p0/2067 | NA                         | R01_cb8564_c83266/f1p0/2067 | NA                         | R01_cb8564_c83266/f1p0/2067 |
| R01_cb15432_c4/f1p0/628     | NA                         | R01_cb15432_c4/f1p0/628     | NA                         | NA                          |
| R01_cb12803_c2/f1p0/1341    | NA                         | NA                          | NA                         | R01_cb12803_c2/f1p0/1341    |
| R01_cb3752_c0/f3p1/1540     | NA                         | NA                          | NA                         | R01_cb3752_c0/f3p1/1540     |
| R01_cb14757_c4/f1p0/1874    | NA                         | R01_cb14757_c4/f1p0/1874    | NA                         | NA                          |
| R01_cb2324_c10/f1p0/3917    | NA                         | R01_cb2324_c10/f1p0/3917    | NA                         | NA                          |
| R01_cb6989_c1/f1p0/2721     | NA                         | R01_cb6989_c1/f1p0/2721     | NA                         | NA                          |
| R01_cb8564_c3178/f1p0/2670  | R01_cb8564_c3178/f1p0/2670 | R01_cb8564_c3178/f1p0/2670  | R01_cb8564_c3178/f1p0/2670 | NA                          |

|                             |                            |                             |                           |                             |
|-----------------------------|----------------------------|-----------------------------|---------------------------|-----------------------------|
| R01_cb15712_c0/f2p0/541     | NA                         | NA                          | NA                        | R01_cb15712_c0/f2p0/541     |
| R01_cb18409_c75/flp0/1035   | R01_cb18409_c75/flp0/1035  | R01_cb18409_c75/flp0/1035   | R01_cb18409_c75/flp0/1035 | R01_cb18409_c75/flp0/1035   |
| R01_cb11019_c1/flp0/1947    | NA                         | NA                          | NA                        | R01_cb11019_c1/flp0/1947    |
| R01_cb18456_c1487/flp0/540  | R01_cb18456_c1487/flp0/540 | R01_cb18456_c1487/flp0/540  | NA                        | NA                          |
| R01_cb4634_c4/flp0/3075     | NA                         | R01_cb4634_c4/flp0/3075     | NA                        | NA                          |
| R01_cb11924_c21/flp1/526    | R01_cb11924_c21/flp1/526   | R01_cb11924_c21/flp1/526    | R01_cb11924_c21/flp1/526  | NA                          |
| R01_cb17151_c1/flp0/1007    | R01_cb17151_c1/flp0/1007   | R01_cb17151_c1/flp0/1007    | R01_cb17151_c1/flp0/1007  | R01_cb17151_c1/flp0/1007    |
| R01_cb9106_c7/flp0/3165     | R01_cb9106_c7/flp0/3165    | R01_cb9106_c7/flp0/3165     | R01_cb9106_c7/flp0/3165   | R01_cb9106_c7/flp0/3165     |
| R01_cb10207_c6/flp0/658     | NA                         | R01_cb10207_c6/flp0/658     | NA                        | NA                          |
| R01_cb7999_c11/flp0/793     | NA                         | NA                          | NA                        | R01_cb7999_c11/flp0/793     |
| R01_cb8564_c15343/flp0/3588 | NA                         | R01_cb8564_c15343/flp0/3588 | NA                        | R01_cb8564_c15343/flp0/3588 |
| R01_cb4223_c3/flp0/2029     | NA                         | NA                          | NA                        | R01_cb4223_c3/flp0/2029     |
| R01_cb1458_c6/flp0/3084     | NA                         | R01_cb1458_c6/flp0/3084     | NA                        | NA                          |
| R01_cb6517_c55/flp0/1589    | NA                         | R01_cb6517_c55/flp0/1589    | NA                        | R01_cb6517_c55/flp0/1589    |
| R01_cb8564_c3245/flp0/2141  | NA                         | R01_cb8564_c3245/flp0/2141  | NA                        | NA                          |
| R01_cb1380_c45/flp0/3005    | NA                         | R01_cb1380_c45/flp0/3005    | NA                        | NA                          |
| R01_cb12420_c1/f2p0/1344    | NA                         | NA                          | NA                        | R01_cb12420_c1/f2p0/1344    |
| R01_cb3449_c51/flp0/339     | NA                         | R01_cb3449_c51/flp0/339     | NA                        | NA                          |
| R01_cb14500_c2/flp0/508     | R01_cb14500_c2/flp0/508    | R01_cb14500_c2/flp0/508     | NA                        | R01_cb14500_c2/flp0/508     |
| R01_cb8564_c10814/flp0/3217 | NA                         | NA                          | NA                        | R01_cb8564_c10814/flp0/3217 |
| R01_cb10215_c6/flp0/678     | NA                         | R01_cb10215_c6/flp0/678     | NA                        | NA                          |
| R01_cb10567_c2/flp0/872     | R01_cb10567_c2/flp0/872    | R01_cb10567_c2/flp0/872     | R01_cb10567_c2/flp0/872   | R01_cb10567_c2/flp0/872     |
| R01_cb17345_c0/f2p0/696     | R01_cb17345_c0/f2p0/696    | R01_cb17345_c0/f2p0/696     | R01_cb17345_c0/f2p0/696   | R01_cb17345_c0/f2p0/696     |
| R01_cb17405_c1/flp0/1209    | NA                         | R01_cb17405_c1/flp0/1209    | NA                        | NA                          |
| R01_cb12286_c6/flp0/774     | NA                         | R01_cb12286_c6/flp0/774     | NA                        | NA                          |
| R01_cb10609_c1/flp0/2785    | NA                         | R01_cb10609_c1/flp0/2785    | NA                        | NA                          |

|                              |                           |                              |                              |                              |
|------------------------------|---------------------------|------------------------------|------------------------------|------------------------------|
| R01_cb8564_c36064/f1p0/2046  | NA                        | R01_cb8564_c36064/f1p0/2046  | R01_cb8564_c36064/f1p0/2046  | R01_cb8564_c36064/f1p0/2046  |
| R01_cb11123_c0/f2p0/845      | NA                        | R01_cb11123_c0/f2p0/845      | NA                           | R01_cb11123_c0/f2p0/845      |
| R01_cb15959_c4/f1p0/1507     | NA                        | NA                           | NA                           | R01_cb15959_c4/f1p0/1507     |
| R01_cb12972_c30/f1p0/1457    | R01_cb12972_c30/f1p0/1457 | R01_cb12972_c30/f1p0/1457    | R01_cb12972_c30/f1p0/1457    | R01_cb12972_c30/f1p0/1457    |
| R01_cb1827_c2/f1p0/4139      | NA                        | R01_cb1827_c2/f1p0/4139      | R01_cb1827_c2/f1p0/4139      | NA                           |
| R01_cb1138_c50/f1p0/813      | R01_cb1138_c50/f1p0/813   | NA                           | NA                           | R01_cb1138_c50/f1p0/813      |
| R01_cb10236_c6/f1p0/1618     | NA                        | R01_cb10236_c6/f1p0/1618     | R01_cb10236_c6/f1p0/1618     | NA                           |
| R01_cb929_c7/f3p1/1831       | NA                        | NA                           | NA                           | R01_cb929_c7/f3p1/1831       |
| R01_cb8564_c73443/f1p0/4382  | NA                        | R01_cb8564_c73443/f1p0/4382  | R01_cb8564_c73443/f1p0/4382  | R01_cb8564_c73443/f1p0/4382  |
| R01_cb8564_c1895/f1p0/2189   | NA                        | NA                           | NA                           | R01_cb8564_c1895/f1p0/2189   |
| R01_cb8126_c2/f1p0/2450      | NA                        | R01_cb8126_c2/f1p0/2450      | NA                           | NA                           |
| R01_cb5815_c9/f1p0/1387      | NA                        | NA                           | NA                           | R01_cb5815_c9/f1p0/1387      |
| R01_cb8564_c119671/f1p0/2360 | NA                        | R01_cb8564_c119671/f1p0/2360 | R01_cb8564_c119671/f1p0/2360 | R01_cb8564_c119671/f1p0/2360 |
| R01_cb4287_c1/f1p0/2677      | NA                        | R01_cb4287_c1/f1p0/2677      | R01_cb4287_c1/f1p0/2677      | R01_cb4287_c1/f1p0/2677      |
| R01_cb12444_c53/f1p0/784     | R01_cb12444_c53/f1p0/784  | R01_cb12444_c53/f1p0/784     | R01_cb12444_c53/f1p0/784     | R01_cb12444_c53/f1p0/784     |
| R01_cb8564_c3176/f1p0/2324   | NA                        | R01_cb8564_c3176/f1p0/2324   | NA                           | NA                           |
| R01_cb13603_c2/f1p0/814      | NA                        | R01_cb13603_c2/f1p0/814      | NA                           | NA                           |
| R01_cb8564_c79521/f2p0/2343  | NA                        | R01_cb8564_c79521/f2p0/2343  | R01_cb8564_c79521/f2p0/2343  | R01_cb8564_c79521/f2p0/2343  |
| R01_cb18456_c1382/f6p0/701   | NA                        | NA                           | NA                           | R01_cb18456_c1382/f6p0/701   |
| R01_cb5942_c1/f1p0/2920      | NA                        | NA                           | NA                           | R01_cb5942_c1/f1p0/2920      |
| R01_cb8564_c20829/f1p0/2257  | NA                        | R01_cb8564_c20829/f1p0/2257  | NA                           | NA                           |
| R01_cb10189_c4/f1p0/2649     | NA                        | R01_cb10189_c4/f1p0/2649     | NA                           | NA                           |
| R01_cb2177_c99/f1p0/3339     | NA                        | R01_cb2177_c99/f1p0/3339     | NA                           | R01_cb2177_c99/f1p0/3339     |
| R01_cb14678_c0/f3p0/537      | R01_cb14678_c0/f3p0/537   | NA                           | R01_cb14678_c0/f3p0/537      | R01_cb14678_c0/f3p0/537      |
| R01_cb5167_c22/f1p0/324      | R01_cb5167_c22/f1p0/324   | R01_cb5167_c22/f1p0/324      | R01_cb5167_c22/f1p0/324      | R01_cb5167_c22/f1p0/324      |

|                                  |                                   |                                  |                                  |                                  |
|----------------------------------|-----------------------------------|----------------------------------|----------------------------------|----------------------------------|
| R01_cb18456_c7542/f1p0/583       | NA                                | NA                               | NA                               | R01_cb18456_c7542/f1p0/583       |
| R01_cb7603_c2/f1p0/2773          | NA                                | R01_cb7603_c2/f1p0/2773          | NA                               | NA                               |
| R01_cb99_c19/f1p0/967            | NA                                | NA                               | NA                               | R01_cb99_c19/f1p0/967            |
| R01_cb8564_c38431/f1p0/3078      | NA                                | R01_cb8564_c38431/f1p0/3078      | NA                               | R01_cb8564_c38431/f1p0/3078      |
| R01_cb261_c6/f2p0/2276           | NA                                | R01_cb261_c6/f2p0/2276           | R01_cb261_c6/f2p0/2276           | NA                               |
| R01_cb7010_c19/f1p1/1926         | NA                                | NA                               | NA                               | R01_cb7010_c19/f1p1/1926         |
| R01_cb7741_c1/f3p0/538           | R01_cb7741_c1/f3p0/538            | R01_cb7741_c1/f3p0/538           | R01_cb7741_c1/f3p0/538           | R01_cb7741_c1/f3p0/538           |
| R01_cb8564_c109380/f4p0/206<br>7 | R01_cb8564_c109380/f4p0/206<br>67 | R01_cb8564_c109380/f4p0/206<br>7 | R01_cb8564_c109380/f4p0/206<br>7 | R01_cb8564_c109380/f4p0/206<br>7 |
| R01_cb7749_c5/f1p0/1533          | NA                                | NA                               | NA                               | R01_cb7749_c5/f1p0/1533          |
| R01_cb2875_c0/f7p0/3313          | NA                                | NA                               | NA                               | R01_cb2875_c0/f7p0/3313          |
| R01_cb8564_c11555/f1p0/3755      | NA                                | NA                               | NA                               | R01_cb8564_c11555/f1p0/3755      |
| R01_cb12620_c9/f1p0/1192         | NA                                | NA                               | NA                               | R01_cb12620_c9/f1p0/1192         |
| R01_cb827_c1/f1p0/3960           | NA                                | NA                               | NA                               | R01_cb827_c1/f1p0/3960           |
| R01_cb423_c7/f1p0/2240           | NA                                | NA                               | NA                               | R01_cb423_c7/f1p0/2240           |
| R01_cb8564_c80425/f1p0/2938      | NA                                | NA                               | NA                               | R01_cb8564_c80425/f1p0/2938      |
| R01_cb14286_c2/f1p0/1146         | NA                                | R01_cb14286_c2/f1p0/1146         | NA                               | R01_cb14286_c2/f1p0/1146         |
| R01_cb8564_c1296/f1p1/2175       | NA                                | NA                               | NA                               | R01_cb8564_c1296/f1p1/2175       |
| R01_cb8564_c52308/f1p0/4637      | NA                                | R01_cb8564_c52308/f1p0/4637      | NA                               | NA                               |
| R01_cb3797_c8/f1p0/1773          | NA                                | NA                               | NA                               | R01_cb3797_c8/f1p0/1773          |
| R01_cb8564_c124934/f1p0/246<br>4 | R01_cb8564_c124934/f1p0/246<br>64 | R01_cb8564_c124934/f1p0/246<br>4 | NA                               | R01_cb8564_c124934/f1p0/246<br>4 |
| R01_cb4185_c3/f1p0/3063          | R01_cb4185_c3/f1p0/3063           | R01_cb4185_c3/f1p0/3063          | R01_cb4185_c3/f1p0/3063          | R01_cb4185_c3/f1p0/3063          |
| R01_cb13900_c4/f1p0/452          | NA                                | R01_cb13900_c4/f1p0/452          | NA                               | R01_cb13900_c4/f1p0/452          |
| R01_cb363_c0/f1p0/4854           | R01_cb363_c0/f1p0/4854            | R01_cb363_c0/f1p0/4854           | NA                               | R01_cb363_c0/f1p0/4854           |
| R01_cb10893_c2/f1p0/518          | R01_cb10893_c2/f1p0/518           | R01_cb10893_c2/f1p0/518          | NA                               | NA                               |

|                              |                             |                              |                              |                              |
|------------------------------|-----------------------------|------------------------------|------------------------------|------------------------------|
| R01_cb8564_c12865/f1p0/4006  | NA                          | NA                           | NA                           | R01_cb8564_c12865/f1p0/4006  |
| R01_cb6608_c11/f1p0/2405     | NA                          | NA                           | NA                           | R01_cb6608_c11/f1p0/2405     |
| R01_cb6352_c5/f1p0/1928      | R01_cb6352_c5/f1p0/1928     | R01_cb6352_c5/f1p0/1928      | NA                           | R01_cb6352_c5/f1p0/1928      |
| R01_cb13449_c6/f1p1/1318     | NA                          | NA                           | NA                           | R01_cb13449_c6/f1p1/1318     |
| R01_cb8564_c126160/f1p0/2517 | NA                          | R01_cb8564_c126160/f1p0/2517 | R01_cb8564_c126160/f1p0/2517 | R01_cb8564_c126160/f1p0/2517 |
| R01_cb8564_c51697/f1p0/2941  | R01_cb8564_c51697/f1p0/2941 | R01_cb8564_c51697/f1p0/2941  | R01_cb8564_c51697/f1p0/2941  | R01_cb8564_c51697/f1p0/2941  |
| R01_cb11025_c2/f1p0/1387     | NA                          | NA                           | NA                           | R01_cb11025_c2/f1p0/1387     |
| R01_cb10572_c2/f2p0/1073     | NA                          | NA                           | NA                           | R01_cb10572_c2/f2p0/1073     |
| R01_cb6615_c28/f2p0/876      | NA                          | NA                           | NA                           | R01_cb6615_c28/f2p0/876      |
| R01_cb8564_c81628/f1p1/2479  | NA                          | NA                           | NA                           | R01_cb8564_c81628/f1p1/2479  |
| R01_cb12574_c0/f1p0/1178     | NA                          | R01_cb12574_c0/f1p0/1178     | R01_cb12574_c0/f1p0/1178     | R01_cb12574_c0/f1p0/1178     |
| R01_cb8564_c9458/f4p16/4874  | NA                          | R01_cb8564_c9458/f4p16/4874  | R01_cb8564_c9458/f4p16/4874  | R01_cb8564_c9458/f4p16/4874  |
| R01_cb10453_c7/f1p0/408      | R01_cb10453_c7/f1p0/408     | R01_cb10453_c7/f1p0/408      | R01_cb10453_c7/f1p0/408      | R01_cb10453_c7/f1p0/408      |
| R01_cb13895_c6/f12p0/525     | NA                          | NA                           | NA                           | R01_cb13895_c6/f12p0/525     |
| R01_cb8391_c1/f1p0/2380      | NA                          | R01_cb8391_c1/f1p0/2380      | NA                           | NA                           |
| R01_cb18456_c1468/f3p0/1754  | NA                          | R01_cb18456_c1468/f3p0/1754  | R01_cb18456_c1468/f3p0/1754  | R01_cb18456_c1468/f3p0/1754  |
| R01_cb16440_c1/f1p0/430      | R01_cb16440_c1/f1p0/430     | R01_cb16440_c1/f1p0/430      | R01_cb16440_c1/f1p0/430      | R01_cb16440_c1/f1p0/430      |
| R01_cb18456_c1260/f11p0/580  | NA                          | R01_cb18456_c1260/f11p0/580  | R01_cb18456_c1260/f11p0/580  | R01_cb18456_c1260/f11p0/580  |
| R01_cb11984_c26/f1p0/566     | NA                          | R01_cb11984_c26/f1p0/566     | NA                           | NA                           |
| R01_cb13386_c12/f1p0/1226    | NA                          | R01_cb13386_c12/f1p0/1226    | NA                           | NA                           |
| R01_cb15512_c1/f1p0/1831     | NA                          | R01_cb15512_c1/f1p0/1831     | NA                           | NA                           |
| R01_cb3907_c6/f1p0/2579      | NA                          | R01_cb3907_c6/f1p0/2579      | NA                           | NA                           |
| R01_cb11522_c1/f1p0/4183     | R01_cb11522_c1/f1p0/4183    | R01_cb11522_c1/f1p0/4183     | NA                           | R01_cb11522_c1/f1p0/4183     |
| R01_cb18694_c1/f1p0/867      | NA                          | NA                           | NA                           | R01_cb18694_c1/f1p0/867      |

|                             |                             |                             |                             |                             |
|-----------------------------|-----------------------------|-----------------------------|-----------------------------|-----------------------------|
| R01_cb8564_c41693/f1p0/2038 | NA                          | NA                          | R01_cb8564_c41693/f1p0/2038 | NA                          |
| R01_cb1887_c4/f1p0/2632     | NA                          | NA                          | NA                          | R01_cb1887_c4/f1p0/2632     |
| R01_cb8564_c89056/f1p0/1956 | NA                          | R01_cb8564_c89056/f1p0/1956 | R01_cb8564_c89056/f1p0/1956 | R01_cb8564_c89056/f1p0/1956 |
| R01_cb10616_c3/f1p0/2697    | NA                          | NA                          | NA                          | R01_cb10616_c3/f1p0/2697    |
| R01_cb17199_c2/f1p0/1081    | NA                          | R01_cb17199_c2/f1p0/1081    | NA                          | NA                          |
| R01_cb2298_c8/f13p1/2289    | NA                          | NA                          | NA                          | R01_cb2298_c8/f13p1/2289    |
| R01_cb9951_c3/f1p0/1285     | R01_cb9951_c3/f1p0/1285     | R01_cb9951_c3/f1p0/1285     | NA                          | R01_cb9951_c3/f1p0/1285     |
| R01_cb5324_c2/f1p0/881      | R01_cb5324_c2/f1p0/881      | R01_cb5324_c2/f1p0/881      | R01_cb5324_c2/f1p0/881      | R01_cb5324_c2/f1p0/881      |
| R01_cb17717_c1/f1p0/951     | NA                          | NA                          | R01_cb17717_c1/f1p0/951     | R01_cb17717_c1/f1p0/951     |
| R01_cb18456_c6792/f1p0/746  | NA                          | R01_cb18456_c6792/f1p0/746  | R01_cb18456_c6792/f1p0/746  | R01_cb18456_c6792/f1p0/746  |
| R01_cb1830_c1/f1p0/4665     | NA                          | R01_cb1830_c1/f1p0/4665     | NA                          | NA                          |
| R01_cb13012_c4/f1p0/1167    | NA                          | NA                          | NA                          | R01_cb13012_c4/f1p0/1167    |
| R01_cb5208_c5/f1p0/2628     | NA                          | NA                          | NA                          | R01_cb5208_c5/f1p0/2628     |
| R01_cb1097_c2/f1p0/3917     | NA                          | NA                          | NA                          | R01_cb1097_c2/f1p0/3917     |
| R01_cb8564_c109285/f4p0/258 | R01_cb8564_c109285/f4p0/258 | R01_cb8564_c109285/f4p0/258 | R01_cb8564_c109285/f4p0/258 | R01_cb8564_c109285/f4p0/258 |
| 4                           | 84                          | 4                           | 4                           | 4                           |
| R01_cb4321_c7/f1p0/1381     | NA                          | R01_cb4321_c7/f1p0/1381     | NA                          | NA                          |
| R01_cb8564_c75166/f1p1/2653 | NA                          | NA                          | NA                          | R01_cb8564_c75166/f1p1/2653 |
| R01_cb18757_c1/f1p0/3326    | NA                          | NA                          | NA                          | R01_cb18757_c1/f1p0/3326    |
| R01_cb8564_c110982/f1p0/256 | NA                          | R01_cb8564_c110982/f1p0/256 | NA                          | R01_cb8564_c110982/f1p0/256 |
| 1                           | NA                          | 1                           | NA                          | 1                           |
| R01_cb7029_c0/f2p0/2473     | NA                          | R01_cb7029_c0/f2p0/2473     | R01_cb7029_c0/f2p0/2473     | R01_cb7029_c0/f2p0/2473     |
| R01_cb4692_c1/f1p0/3283     | NA                          | R01_cb4692_c1/f1p0/3283     | NA                          | NA                          |
| R01_cb5569_c0/f1p0/3070     | NA                          | R01_cb5569_c0/f1p0/3070     | NA                          | NA                          |
| R01_cb3639_c1/f1p0/2018     | NA                          | NA                          | NA                          | R01_cb3639_c1/f1p0/2018     |
| R01_cb13590_c0/f3p0/787     | NA                          | R01_cb13590_c0/f3p0/787     | R01_cb13590_c0/f3p0/787     | R01_cb13590_c0/f3p0/787     |



|                             |                         |                             |                           |                            |
|-----------------------------|-------------------------|-----------------------------|---------------------------|----------------------------|
| R01_cb3243_c2/flp0/3677     | NA                      | NA                          | NA                        | R01_cb3243_c2/flp0/3677    |
| R01_cb11134_c0/flp0/982     | NA                      | R01_cb11134_c0/flp0/982     | R01_cb11134_c0/flp0/982   | R01_cb11134_c0/flp0/982    |
| R01_cb8564_c5087/flp0/3205  | NA                      | NA                          | NA                        | R01_cb8564_c5087/flp0/3205 |
| R01_cb14706_c2/f2p1/593     | R01_cb14706_c2/f2p1/593 | R01_cb14706_c2/f2p1/593     | R01_cb14706_c2/f2p1/593   | R01_cb14706_c2/f2p1/593    |
| R01_cb5987_c3/flp0/1602     | NA                      | NA                          | NA                        | R01_cb5987_c3/flp0/1602    |
| R01_cb9866_c2/flp0/2072     | NA                      | NA                          | NA                        | R01_cb9866_c2/flp0/2072    |
| R01_cb14729_c4/flp2/652     | NA                      | R01_cb14729_c4/flp2/652     | NA                        | NA                         |
| R01_cb2002_c3/flp0/724      | NA                      | R01_cb2002_c3/flp0/724      | NA                        | NA                         |
| R01_cb8545_c5/flp0/875      | NA                      | NA                          | R01_cb8545_c5/flp0/875    | R01_cb8545_c5/flp0/875     |
| R01_cb14610_c3/flp0/513     | R01_cb14610_c3/flp0/513 | R01_cb14610_c3/flp0/513     | R01_cb14610_c3/flp0/513   | R01_cb14610_c3/flp0/513    |
| R01_cb7088_c10/flp0/2704    | NA                      | R01_cb7088_c10/flp0/2704    | NA                        | NA                         |
| R01_cb10725_c4/flp0/1028    | NA                      | R01_cb10725_c4/flp0/1028    | R01_cb10725_c4/flp0/1028  | R01_cb10725_c4/flp0/1028   |
| R01_cb10878_c1/flp0/3270    | NA                      | R01_cb10878_c1/flp0/3270    | NA                        | NA                         |
| R01_cb10038_c0/f8p0/899     | NA                      | NA                          | NA                        | R01_cb10038_c0/f8p0/899    |
| R01_cb18456_c3612/flp0/1082 | NA                      | R01_cb18456_c3612/flp0/1082 | NA                        | NA                         |
| R01_cb12234_c2/flp0/403     | R01_cb12234_c2/flp0/403 | R01_cb12234_c2/flp0/403     | R01_cb12234_c2/flp0/403   | R01_cb12234_c2/flp0/403    |
| R01_cb2738_c1/flp0/3829     | NA                      | NA                          | NA                        | R01_cb2738_c1/flp0/3829    |
| R01_cb12945_c1/flp0/1386    | NA                      | NA                          | NA                        | R01_cb12945_c1/flp0/1386   |
| R01_cb10272_c27/flp0/1290   | NA                      | NA                          | R01_cb10272_c27/flp0/1290 | R01_cb10272_c27/flp0/1290  |
| R01_cb12286_c18/flp0/911    | NA                      | R01_cb12286_c18/flp0/911    | NA                        | NA                         |
| R01_cb16785_c1/flp0/1773    | NA                      | R01_cb16785_c1/flp0/1773    | NA                        | NA                         |
| R01_cb18413_c0/flp0/1007    | NA                      | R01_cb18413_c0/flp0/1007    | NA                        | NA                         |
| R01_cb513_c11/flp0/1899     | R01_cb513_c11/flp0/1899 | R01_cb513_c11/flp0/1899     | NA                        | NA                         |
| R01_cb1228_c47/flp0/2325    | NA                      | NA                          | NA                        | R01_cb1228_c47/flp0/2325   |
| R01_cb8459_c0/f2p0/2367     | NA                      | R01_cb8459_c0/f2p0/2367     | R01_cb8459_c0/f2p0/2367   | NA                         |
| R01_cb13178_c27/fl0p0/541   | NA                      | R01_cb13178_c27/fl0p0/541   | NA                        | NA                         |

|                              |                          |                             |                          |                              |
|------------------------------|--------------------------|-----------------------------|--------------------------|------------------------------|
| R01_cb17765_c3/flp0/1599     | NA                       | R01_cb17765_c3/flp0/1599    | R01_cb17765_c3/flp0/1599 | R01_cb17765_c3/flp0/1599     |
| R01_cb11918_c2/f3p1/1220     | NA                       | NA                          | NA                       | R01_cb11918_c2/f3p1/1220     |
| R01_cb18409_c55/flp0/411     | R01_cb18409_c55/flp0/411 | R01_cb18409_c55/flp0/411    | R01_cb18409_c55/flp0/411 | R01_cb18409_c55/flp0/411     |
| R01_cb5208_c14/flp0/2726     | NA                       | NA                          | NA                       | R01_cb5208_c14/flp0/2726     |
| R01_cb10681_c4/f3p0/933      | NA                       | NA                          | NA                       | R01_cb10681_c4/f3p0/933      |
| R01_cb9320_c0/flp0/2123      | NA                       | R01_cb9320_c0/flp0/2123     | R01_cb9320_c0/flp0/2123  | NA                           |
| R01_cb8564_c73461/flp0/3149  | NA                       | R01_cb8564_c73461/flp0/3149 | NA                       | NA                           |
| R01_cb7940_c36/flp1/1937     | NA                       | R01_cb7940_c36/flp1/1937    | NA                       | NA                           |
| R01_cb9530_c2/flp0/2426      | NA                       | NA                          | NA                       | R01_cb9530_c2/flp0/2426      |
| R01_cb1346_c6/flp0/4350      | NA                       | R01_cb1346_c6/flp0/4350     | NA                       | NA                           |
| R01_cb18377_c0/flp0/756      | R01_cb18377_c0/flp0/756  | R01_cb18377_c0/flp0/756     | R01_cb18377_c0/flp0/756  | R01_cb18377_c0/flp0/756      |
| R01_cb17008_c2/flp0/819      | NA                       | NA                          | R01_cb17008_c2/flp0/819  | NA                           |
| R01_cb10003_c0/flp0/1886     | NA                       | R01_cb10003_c0/flp0/1886    | NA                       | R01_cb10003_c0/flp0/1886     |
| R01_cb17805_c2/flp0/618      | NA                       | R01_cb17805_c2/flp0/618     | NA                       | R01_cb17805_c2/flp0/618      |
| R01_cb18118_c0/flp0/1543     | NA                       | NA                          | NA                       | R01_cb18118_c0/flp0/1543     |
| R01_cb8213_c8/f4p3/2432      | NA                       | NA                          | NA                       | R01_cb8213_c8/f4p3/2432      |
| R01_cb2602_c14/flp0/1520     | R01_cb2602_c14/flp0/1520 | R01_cb2602_c14/flp0/1520    | NA                       | R01_cb2602_c14/flp0/1520     |
| R01_cb8564_c20052/flp0/2339  | NA                       | R01_cb8564_c20052/flp0/2339 | NA                       | R01_cb8564_c20052/flp0/2339  |
| R01_cb16829_c0/flp0/1387     | NA                       | R01_cb16829_c0/flp0/1387    | NA                       | NA                           |
| R01_cb8564_c145851/f5p1/2705 | NA                       | NA                          | NA                       | R01_cb8564_c145851/f5p1/2705 |
| R01_cb15853_c2/flp1/524      | NA                       | R01_cb15853_c2/flp1/524     | NA                       | R01_cb15853_c2/flp1/524      |
| R01_cb9630_c39/flp0/2941     | NA                       | R01_cb9630_c39/flp0/2941    | NA                       | NA                           |
| R01_cb507_c1/flp0/4600       | NA                       | NA                          | NA                       | R01_cb507_c1/flp0/4600       |
| R01_cb18456_c4765/flp0/489   | NA                       | NA                          | NA                       | R01_cb18456_c4765/flp0/489   |
| R01_cb7738_c2/flp0/2225      | NA                       | NA                          | NA                       | R01_cb7738_c2/flp0/2225      |

|                             |                            |                             |                             |                             |
|-----------------------------|----------------------------|-----------------------------|-----------------------------|-----------------------------|
| R01_cb18456_c7204/f1p0/598  | R01_cb18456_c7204/f1p0/598 | R01_cb18456_c7204/f1p0/598  | R01_cb18456_c7204/f1p0/598  | R01_cb18456_c7204/f1p0/598  |
| R01_cb8564_c111463/f2p0/429 | NA                         | R01_cb8564_c111463/f2p0/429 | NA                          | NA                          |
| 4                           |                            | 4                           |                             |                             |
| R01_cb8564_c110236/f1p0/253 | NA                         | R01_cb8564_c110236/f1p0/253 | R01_cb8564_c110236/f1p0/253 | R01_cb8564_c110236/f1p0/253 |
| 0                           |                            | 0                           | 0                           | 0                           |
| R01_cb10228_c4/f1p0/746     | R01_cb10228_c4/f1p0/746    | R01_cb10228_c4/f1p0/746     | R01_cb10228_c4/f1p0/746     | R01_cb10228_c4/f1p0/746     |
| R01_cb17335_c0/f1p0/480     | NA                         | R01_cb17335_c0/f1p0/480     | R01_cb17335_c0/f1p0/480     | NA                          |
| R01_cb10192_c0/f5p0/1335    | NA                         | NA                          | NA                          | R01_cb10192_c0/f5p0/1335    |
| R01_cb412_c12/f3p1/4582     | NA                         | NA                          | NA                          | R01_cb412_c12/f3p1/4582     |
| R01_cb10402_c4/f1p0/1399    | NA                         | R01_cb10402_c4/f1p0/1399    | NA                          | NA                          |
| R01_cb9272_c0/f3p0/2072     | NA                         | R01_cb9272_c0/f3p0/2072     | R01_cb9272_c0/f3p0/2072     | R01_cb9272_c0/f3p0/2072     |
| R01_cb14708_c1/f1p0/934     | NA                         | R01_cb14708_c1/f1p0/934     | NA                          | NA                          |
| R01_cb1628_c1/f2p0/1924     | NA                         | NA                          | NA                          | R01_cb1628_c1/f2p0/1924     |
| R01_cb11603_c2/f1p0/1065    | NA                         | R01_cb11603_c2/f1p0/1065    | NA                          | NA                          |
| R01_cb17324_c0/f2p0/817     | NA                         | R01_cb17324_c0/f2p0/817     | R01_cb17324_c0/f2p0/817     | R01_cb17324_c0/f2p0/817     |
| R01_cb16596_c20/f1p0/721    | NA                         | NA                          | NA                          | R01_cb16596_c20/f1p0/721    |
| R01_cb8564_c80765/f1p0/2029 | NA                         | NA                          | NA                          | R01_cb8564_c80765/f1p0/2029 |
| R01_cb10034_c64/f1p0/1617   | NA                         | R01_cb10034_c64/f1p0/1617   | NA                          | NA                          |
| R01_cb5593_c0/f1p0/3063     | NA                         | R01_cb5593_c0/f1p0/3063     | R01_cb5593_c0/f1p0/3063     | R01_cb5593_c0/f1p0/3063     |
| R01_cb2274_c9/f1p1/2153     | NA                         | R01_cb2274_c9/f1p1/2153     | NA                          | NA                          |
| R01_cb10207_c3/f1p0/4283    | NA                         | R01_cb10207_c3/f1p0/4283    | R01_cb10207_c3/f1p0/4283    | R01_cb10207_c3/f1p0/4283    |
| R01_cb9937_c0/f9p0/1283     | NA                         | R01_cb9937_c0/f9p0/1283     | R01_cb9937_c0/f9p0/1283     | R01_cb9937_c0/f9p0/1283     |
| R01_cb9037_c1/f2p0/3528     | NA                         | R01_cb9037_c1/f2p0/3528     | NA                          | NA                          |
| R01_cb15353_c1/f1p0/1329    | NA                         | NA                          | NA                          | R01_cb15353_c1/f1p0/1329    |
| R01_cb11141_c9/f1p0/1231    | NA                         | NA                          | NA                          | R01_cb11141_c9/f1p0/1231    |
| R01_cb8564_c33830/f4p1/1979 | NA                         | NA                          | NA                          | R01_cb8564_c33830/f4p1/1979 |

|                                  |                                   |                                  |                                  |                                  |
|----------------------------------|-----------------------------------|----------------------------------|----------------------------------|----------------------------------|
| R01_cb11569_c1/flp0/4589         | R01_cb11569_c1/flp0/4589          | R01_cb11569_c1/flp0/4589         | R01_cb11569_c1/flp0/4589         | R01_cb11569_c1/flp0/4589         |
| R01_cb14251_c5/flp2/1275         | NA                                | R01_cb14251_c5/flp2/1275         | NA                               | NA                               |
| R01_cb6586_c3/flp0/2782          | NA                                | R01_cb6586_c3/flp0/2782          | NA                               | NA                               |
| R01_cb8564_c40975/flp1/2422      | NA                                | NA                               | NA                               | R01_cb8564_c40975/flp1/2422      |
| R01_cb2571_c21/flp1/3851         | NA                                | NA                               | NA                               | R01_cb2571_c21/flp1/3851         |
| R01_cb8564_c4134/flp0/2932       | NA                                | R01_cb8564_c4134/flp0/2932       | NA                               | R01_cb8564_c4134/flp0/2932       |
| R01_cb644_c5/flp0/4671           | NA                                | NA                               | NA                               | R01_cb644_c5/flp0/4671           |
| R01_cb8564_c112417/flp0/205<br>6 | R01_cb8564_c112417/flp0/205<br>56 | R01_cb8564_c112417/flp0/205<br>6 | R01_cb8564_c112417/flp0/205<br>6 | R01_cb8564_c112417/flp0/205<br>6 |
| R01_cb8564_c72849/flp0/2326      | NA                                | NA                               | NA                               | R01_cb8564_c72849/flp0/2326      |
| R01_cb4478_c1/flp0/3008          | NA                                | R01_cb4478_c1/flp0/3008          | NA                               | NA                               |
| R01_cb188_c8/flp0/1931           | NA                                | NA                               | NA                               | R01_cb188_c8/flp0/1931           |
| R01_cb8564_c117483/flp0/215<br>8 | R01_cb8564_c117483/flp0/215<br>58 | R01_cb8564_c117483/flp0/215<br>8 | NA                               | NA                               |
| R01_cb4744_c7/flp0/1486          | NA                                | R01_cb4744_c7/flp0/1486          | R01_cb4744_c7/flp0/1486          | R01_cb4744_c7/flp0/1486          |
| R01_cb8564_c35473/flp0/2841      | NA                                | NA                               | NA                               | R01_cb8564_c35473/flp0/2841      |
| R01_cb7693_c3/flp0/2570          | NA                                | R01_cb7693_c3/flp0/2570          | R01_cb7693_c3/flp0/2570          | R01_cb7693_c3/flp0/2570          |
| R01_cb11046_c0/f9p0/487          | NA                                | R01_cb11046_c0/f9p0/487          | NA                               | R01_cb11046_c0/f9p0/487          |
| R01_cb14316_c13/flp0/609         | R01_cb14316_c13/flp0/609          | R01_cb14316_c13/flp0/609         | R01_cb14316_c13/flp0/609         | R01_cb14316_c13/flp0/609         |
| R01_cb8564_c35514/flp0/4199      | NA                                | R01_cb8564_c35514/flp0/4199      | R01_cb8564_c35514/flp0/4199      | NA                               |
| R01_cb13884_c14/flp0/565         | R01_cb13884_c14/flp0/565          | NA                               | R01_cb13884_c14/flp0/565         | R01_cb13884_c14/flp0/565         |
| R01_cb16968_c0/flp0/1336         | NA                                | NA                               | NA                               | R01_cb16968_c0/flp0/1336         |
| R01_cb5214_c10/f9p1/2990         | NA                                | R01_cb5214_c10/f9p1/2990         | R01_cb5214_c10/f9p1/2990         | NA                               |
| R01_cb6802_c36/flp0/3647         | R01_cb6802_c36/flp0/3647          | R01_cb6802_c36/flp0/3647         | R01_cb6802_c36/flp0/3647         | R01_cb6802_c36/flp0/3647         |
| R01_cb2357_c0/f3p1/3958          | NA                                | NA                               | NA                               | R01_cb2357_c0/f3p1/3958          |
| R01_cb3926_c3/flp0/1949          | NA                                | R01_cb3926_c3/flp0/1949          | NA                               | NA                               |

|                             |                             |                             |                             |                             |
|-----------------------------|-----------------------------|-----------------------------|-----------------------------|-----------------------------|
| R01_cb7999_c4/flp0/989      | NA                          | NA                          | NA                          | R01_cb7999_c4/flp0/989      |
| R01_cb8564_c81496/flp0/4041 | NA                          | R01_cb8564_c81496/flp0/4041 | NA                          | NA                          |
| R01_cb18610_c2/flp0/5235    | NA                          | R01_cb18610_c2/flp0/5235    | NA                          | NA                          |
| R01_cb3426_c25/flp0/3366    | NA                          | NA                          | NA                          | R01_cb3426_c25/flp0/3366    |
| R01_cb8564_c80489/flp0/1988 | R01_cb8564_c80489/flp0/1988 | R01_cb8564_c80489/flp0/1988 | NA                          | NA                          |
| R01_cb8564_c50869/flp0/3578 | NA                          | R01_cb8564_c50869/flp0/3578 | NA                          | NA                          |
| R01_cb13203_c1/flp0/830     | R01_cb13203_c1/flp0/830     | R01_cb13203_c1/flp0/830     | R01_cb13203_c1/flp0/830     | R01_cb13203_c1/flp0/830     |
| R01_cb17839_c0/flp0/757     | NA                          | R01_cb17839_c0/flp0/757     | NA                          | R01_cb17839_c0/flp0/757     |
| R01_cb11535_c2/flp0/792     | R01_cb11535_c2/flp0/792     | R01_cb11535_c2/flp0/792     | R01_cb11535_c2/flp0/792     | R01_cb11535_c2/flp0/792     |
| R01_cb12445_c3/f3p0/993     | NA                          | R01_cb12445_c3/f3p0/993     | NA                          | NA                          |
| R01_cb10662_c4/flp0/1487    | NA                          | R01_cb10662_c4/flp0/1487    | NA                          | R01_cb10662_c4/flp0/1487    |
| R01_cb8564_c3741/flp0/2794  | NA                          | R01_cb8564_c3741/flp0/2794  | R01_cb8564_c3741/flp0/2794  | R01_cb8564_c3741/flp0/2794  |
| R01_cb18374_c1/flp0/1256    | NA                          | R01_cb18374_c1/flp0/1256    | NA                          | NA                          |
| R01_cb8564_c15644/flp0/3192 | NA                          | NA                          | NA                          | R01_cb8564_c15644/flp0/3192 |
| R01_cb6532_c6/flp0/1540     | NA                          | NA                          | NA                          | R01_cb6532_c6/flp0/1540     |
| R01_cb7741_c4/flp0/2284     | R01_cb7741_c4/flp0/2284     | R01_cb7741_c4/flp0/2284     | R01_cb7741_c4/flp0/2284     | R01_cb7741_c4/flp0/2284     |
| R01_cb18456_c1716/f2p0/1857 | NA                          | R01_cb18456_c1716/f2p0/1857 | R01_cb18456_c1716/f2p0/1857 | R01_cb18456_c1716/f2p0/1857 |
| R01_cb14125_c138/flp0/1025  | NA                          | R01_cb14125_c138/flp0/1025  | NA                          | R01_cb14125_c138/flp0/1025  |
| R01_cb4501_c13/flp0/2489    | NA                          | NA                          | NA                          | R01_cb4501_c13/flp0/2489    |
| R01_cb15207_c120/flp0/650   | NA                          | R01_cb15207_c120/flp0/650   | R01_cb15207_c120/flp0/650   | NA                          |
| R01_cb18392_c0/flp1/973     | NA                          | NA                          | NA                          | R01_cb18392_c0/flp1/973     |
| R01_cb7258_c4/flp0/1670     | NA                          | R01_cb7258_c4/flp0/1670     | R01_cb7258_c4/flp0/1670     | NA                          |
| R01_cb11745_c2/flp0/999     | R01_cb11745_c2/flp0/999     | R01_cb11745_c2/flp0/999     | R01_cb11745_c2/flp0/999     | R01_cb11745_c2/flp0/999     |
| R01_cb6983_c0/flp0/2724     | NA                          | R01_cb6983_c0/flp0/2724     | R01_cb6983_c0/flp0/2724     | NA                          |
| R01_cb5631_c26/flp1/2402    | NA                          | R01_cb5631_c26/flp1/2402    | NA                          | R01_cb5631_c26/flp1/2402    |

|                              |                            |                            |                             |                              |
|------------------------------|----------------------------|----------------------------|-----------------------------|------------------------------|
| R01_cb4300_c4/flp0/1885      | R01_cb4300_c4/flp0/1885    | R01_cb4300_c4/flp0/1885    | R01_cb4300_c4/flp0/1885     | NA                           |
| R01_cb8564_c72586/flp0/3056  | NA                         | NA                         | R01_cb8564_c72586/flp0/3056 | R01_cb8564_c72586/flp0/3056  |
| R01_cb9196_c6/flp0/1977      | NA                         | R01_cb9196_c6/flp0/1977    | NA                          | NA                           |
| R01_cb6982_c4/flp0/5150      | NA                         | R01_cb6982_c4/flp0/5150    | NA                          | NA                           |
| R01_cb8982_c1/flp0/2213      | NA                         | NA                         | NA                          | R01_cb8982_c1/flp0/2213      |
| R01_cb8564_c3076/flp0/2807   | NA                         | R01_cb8564_c3076/flp0/2807 | NA                          | R01_cb8564_c3076/flp0/2807   |
| R01_cb13169_c2/flp0/649      | R01_cb13169_c2/flp0/649    | R01_cb13169_c2/flp0/649    | R01_cb13169_c2/flp0/649     | R01_cb13169_c2/flp0/649      |
| R01_cb14761_c8/flp0/949      | NA                         | R01_cb14761_c8/flp0/949    | R01_cb14761_c8/flp0/949     | R01_cb14761_c8/flp0/949      |
| R01_cb15480_c0/f2p0/573      | NA                         | R01_cb15480_c0/f2p0/573    | NA                          | NA                           |
| R01_cb2445_c23/flp0/3339     | NA                         | NA                         | NA                          | R01_cb2445_c23/flp0/3339     |
| R01_cb8564_c121875/flp0/1960 | NA                         | NA                         | NA                          | R01_cb8564_c121875/flp0/1960 |
| R01_cb11073_c1/flp0/3410     | NA                         | R01_cb11073_c1/flp0/3410   | NA                          | NA                           |
| R01_cb18456_c1527/f3p0/631   | R01_cb18456_c1527/f3p0/631 | R01_cb18456_c1527/f3p0/631 | R01_cb18456_c1527/f3p0/631  | NA                           |
| R01_cb8564_c126874/flp0/2195 | NA                         | NA                         | NA                          | R01_cb8564_c126874/flp0/2195 |
| R01_cb14375_c1/flp0/1220     | NA                         | R01_cb14375_c1/flp0/1220   | NA                          | NA                           |
| R01_cb4824_c4/flp0/3555      | R01_cb4824_c4/flp0/3555    | R01_cb4824_c4/flp0/3555    | R01_cb4824_c4/flp0/3555     | R01_cb4824_c4/flp0/3555      |
| R01_cb8564_c115222/flp0/2238 | NA                         | NA                         | NA                          | R01_cb8564_c115222/flp0/2238 |
| R01_cb10679_c1/flp0/2332     | R01_cb10679_c1/flp0/2332   | R01_cb10679_c1/flp0/2332   | R01_cb10679_c1/flp0/2332    | R01_cb10679_c1/flp0/2332     |
| R01_cb8564_c91216/flp0/2554  | NA                         | NA                         | NA                          | R01_cb8564_c91216/flp0/2554  |
| R01_cb14125_c123/flp0/617    | NA                         | R01_cb14125_c123/flp0/617  | R01_cb14125_c123/flp0/617   | NA                           |
| R01_cb8116_c2/f2p0/2414      | R01_cb8116_c2/f2p0/2414    | R01_cb8116_c2/f2p0/2414    | R01_cb8116_c2/f2p0/2414     | NA                           |
| R01_cb9119_c6/flp2/2148      | NA                         | NA                         | NA                          | R01_cb9119_c6/flp2/2148      |
| R01_cb14195_c5/flp0/475      | R01_cb14195_c5/flp0/475    | R01_cb14195_c5/flp0/475    | R01_cb14195_c5/flp0/475     | R01_cb14195_c5/flp0/475      |

|                              |                          |                             |                             |                              |
|------------------------------|--------------------------|-----------------------------|-----------------------------|------------------------------|
| R01_cb8564_c40193/flp0/3545  | NA                       | R01_cb8564_c40193/flp0/3545 | R01_cb8564_c40193/flp0/3545 | R01_cb8564_c40193/flp0/3545  |
| R01_cb1998_c4/flp0/3483      | NA                       | R01_cb1998_c4/flp0/3483     | R01_cb1998_c4/flp0/3483     | NA                           |
| R01_cb14421_c2/flp0/937      | NA                       | NA                          | NA                          | R01_cb14421_c2/flp0/937      |
| R01_cb805_c9/flp0/1709       | NA                       | NA                          | NA                          | R01_cb805_c9/flp0/1709       |
| R01_cb15890_c0/flp0/759      | NA                       | NA                          | NA                          | R01_cb15890_c0/flp0/759      |
| R01_cb12314_c8/f7p1/552      | NA                       | NA                          | R01_cb12314_c8/f7p1/552     | NA                           |
| R01_cb1398_c10/flp0/1985     | NA                       | R01_cb1398_c10/flp0/1985    | R01_cb1398_c10/flp0/1985    | NA                           |
| R01_cb7825_c5/flp0/1011      | NA                       | R01_cb7825_c5/flp0/1011     | NA                          | NA                           |
| R01_cb12192_c2/flp0/1204     | R01_cb12192_c2/flp0/1204 | R01_cb12192_c2/flp0/1204    | R01_cb12192_c2/flp0/1204    | R01_cb12192_c2/flp0/1204     |
| R01_cb1398_c3/flp0/4846      | NA                       | R01_cb1398_c3/flp0/4846     | R01_cb1398_c3/flp0/4846     | R01_cb1398_c3/flp0/4846      |
| R01_cb8564_c15894/flp0/2875  | NA                       | NA                          | NA                          | R01_cb8564_c15894/flp0/2875  |
| R01_cb822_c26/flp0/2757      | NA                       | NA                          | NA                          | R01_cb822_c26/flp0/2757      |
| R01_cb8564_c114711/flp0/2060 | NA                       | NA                          | NA                          | R01_cb8564_c114711/flp0/2060 |
| R01_cb8779_c3/flp0/2326      | NA                       | NA                          | NA                          | R01_cb8779_c3/flp0/2326      |
| R01_cb12936_c0/flp0/803      | NA                       | R01_cb12936_c0/flp0/803     | NA                          | NA                           |
| R01_cb11035_c0/flp0/1363     | NA                       | NA                          | R01_cb11035_c0/flp0/1363    | R01_cb11035_c0/flp0/1363     |
| R01_cb8564_c82617/flp1/2534  | NA                       | NA                          | NA                          | R01_cb8564_c82617/flp1/2534  |
| R01_cb15880_c0/flp0/558      | R01_cb15880_c0/flp0/558  | NA                          | R01_cb15880_c0/flp0/558     | R01_cb15880_c0/flp0/558      |
| R01_cb16442_c1/flp0/1061     | NA                       | R01_cb16442_c1/flp0/1061    | R01_cb16442_c1/flp0/1061    | R01_cb16442_c1/flp0/1061     |
| R01_cb4602_c8/flp0/2365      | NA                       | R01_cb4602_c8/flp0/2365     | NA                          | R01_cb4602_c8/flp0/2365      |
| R01_cb14720_c1/flp0/540      | NA                       | NA                          | NA                          | R01_cb14720_c1/flp0/540      |
| R01_cb8115_c2/flp0/379       | R01_cb8115_c2/flp0/379   | R01_cb8115_c2/flp0/379      | R01_cb8115_c2/flp0/379      | R01_cb8115_c2/flp0/379       |
| R01_cb234_c7/flp1/3110       | NA                       | NA                          | NA                          | R01_cb234_c7/flp1/3110       |
| R01_cb3022_c27/flp0/555      | NA                       | R01_cb3022_c27/flp0/555     | NA                          | NA                           |
| R01_cb8564_c77005/flp1/2490  | NA                       | R01_cb8564_c77005/flp1/2490 | NA                          | NA                           |

|                              |                             |                              |                              |                              |
|------------------------------|-----------------------------|------------------------------|------------------------------|------------------------------|
| R01_cb16815_c0/flp0/711      | NA                          | R01_cb16815_c0/flp0/711      | NA                           | NA                           |
| R01_cb3578_c8/flp0/761       | NA                          | R01_cb3578_c8/flp0/761       | NA                           | R01_cb3578_c8/flp0/761       |
| R01_cb8897_c0/flp0/2243      | NA                          | R01_cb8897_c0/flp0/2243      | NA                           | NA                           |
| R01_cb6615_c13/flp0/2451     | NA                          | NA                           | R01_cb6615_c13/flp0/2451     | R01_cb6615_c13/flp0/2451     |
| R01_cb8564_c9748/f3p2/4681   | NA                          | R01_cb8564_c9748/f3p2/4681   | NA                           | NA                           |
| R01_cb8564_c4626/flp0/3211   | NA                          | R01_cb8564_c4626/flp0/3211   | R01_cb8564_c4626/flp0/3211   | R01_cb8564_c4626/flp0/3211   |
| R01_cb8564_c17637/flp0/3299  | R01_cb8564_c17637/flp0/3299 | R01_cb8564_c17637/flp0/3299  | R01_cb8564_c17637/flp0/3299  | R01_cb8564_c17637/flp0/3299  |
| R01_cb18280_c0/flp0/1564     | R01_cb18280_c0/flp0/1564    | R01_cb18280_c0/flp0/1564     | NA                           | NA                           |
| R01_cb2275_c1/flp0/3022      | NA                          | R01_cb2275_c1/flp0/3022      | R01_cb2275_c1/flp0/3022      | R01_cb2275_c1/flp0/3022      |
| R01_cb18456_c7601/flp0/1376  | NA                          | R01_cb18456_c7601/flp0/1376  | R01_cb18456_c7601/flp0/1376  | R01_cb18456_c7601/flp0/1376  |
| R01_cb8564_c118186/flp0/2178 | NA                          | NA                           | R01_cb8564_c118186/flp0/2178 | R01_cb8564_c118186/flp0/2178 |
| R01_cb625_c3/flp0/3983       | NA                          | NA                           | NA                           | R01_cb625_c3/flp0/3983       |
| R01_cb15053_c8/flp0/373      | R01_cb15053_c8/flp0/373     | R01_cb15053_c8/flp0/373      | R01_cb15053_c8/flp0/373      | NA                           |
| R01_cb4669_c17/flp0/2363     | R01_cb4669_c17/flp0/2363    | R01_cb4669_c17/flp0/2363     | NA                           | NA                           |
| R01_cb18045_c0/flp0/475      | R01_cb18045_c0/flp0/475     | R01_cb18045_c0/flp0/475      | R01_cb18045_c0/flp0/475      | R01_cb18045_c0/flp0/475      |
| R01_cb8564_c113684/flp0/3476 | NA                          | R01_cb8564_c113684/flp0/3476 | NA                           | NA                           |
| R01_cb781_c28/flp0/1999      | NA                          | NA                           | NA                           | R01_cb781_c28/flp0/1999      |
| R01_cb3637_c4/flp0/1412      | NA                          | R01_cb3637_c4/flp0/1412      | NA                           | NA                           |
| R01_cb18359_c1/flp0/1680     | NA                          | NA                           | NA                           | R01_cb18359_c1/flp0/1680     |
| R01_cb8564_c25695/flp1/2271  | NA                          | R01_cb8564_c25695/flp1/2271  | NA                           | R01_cb8564_c25695/flp1/2271  |
| R01_cb4134_c19/flp1/2903     | NA                          | NA                           | NA                           | R01_cb4134_c19/flp1/2903     |
| R01_cb15607_c0/flp0/617      | NA                          | NA                           | R01_cb15607_c0/flp0/617      | NA                           |
| R01_cb4295_c39/flp0/1929     | NA                          | R01_cb4295_c39/flp0/1929     | NA                           | NA                           |



|                                  |                                 |                                  |                                 |                                  |
|----------------------------------|---------------------------------|----------------------------------|---------------------------------|----------------------------------|
| R01_cb8564_c107887/flp0/271<br>6 | NA                              | R01_cb8564_c107887/flp0/271<br>6 | NA                              | NA                               |
| R01_cb10024_c565/flp1/620        | NA                              | NA                               | R01_cb10024_c565/flp1/620       | NA                               |
| R01_cb8564_c35464/flp1/3983      | NA                              | R01_cb8564_c35464/flp1/3983      | R01_cb8564_c35464/flp1/3983     | NA                               |
| R01_cb7334_c1/f3p0/1895          | NA                              | NA                               | NA                              | R01_cb7334_c1/f3p0/1895          |
| R01_cb12620_c15/f42p0/1044       | NA                              | NA                               | NA                              | R01_cb12620_c15/f42p0/1044       |
| R01_cb18528_c1/flp0/678          | NA                              | R01_cb18528_c1/flp0/678          | NA                              | NA                               |
| R01_cb16841_c1/flp0/441          | NA                              | R01_cb16841_c1/flp0/441          | NA                              | NA                               |
| R01_cb8564_c126368/flp0/260<br>3 | NA                              | NA                               | NA                              | R01_cb8564_c126368/flp0/260<br>3 |
| R01_cb8564_c16926/flp0/296<br>4  | R01_cb8564_c16926/flp0/296<br>4 | R01_cb8564_c16926/flp0/296<br>4  | R01_cb8564_c16926/flp0/296<br>4 | R01_cb8564_c16926/flp0/296<br>4  |
| R01_cb7731_c2/f3p0/1452          | NA                              | NA                               | NA                              | R01_cb7731_c2/f3p0/1452          |
| R01_cb10197_c1/flp0/2608         | R01_cb10197_c1/flp0/2608        | R01_cb10197_c1/flp0/2608         | R01_cb10197_c1/flp0/2608        | R01_cb10197_c1/flp0/2608         |
| R01_cb8564_c41853/flp0/3754      | NA                              | NA                               | NA                              | R01_cb8564_c41853/flp0/3754      |
| R01_cb11271_c0/f2p0/582          | NA                              | R01_cb11271_c0/f2p0/582          | NA                              | NA                               |
| R01_cb16125_c22/flp0/1760        | NA                              | NA                               | R01_cb16125_c22/flp0/1760       | R01_cb16125_c22/flp0/1760        |
| R01_cb8564_c112444/flp0/301<br>2 | NA                              | R01_cb8564_c112444/flp0/301<br>2 | NA                              | NA                               |
| R01_cb14675_c8/flp0/840          | R01_cb14675_c8/flp0/840         | R01_cb14675_c8/flp0/840          | R01_cb14675_c8/flp0/840         | R01_cb14675_c8/flp0/840          |
| R01_cb18456_c7273/flp0/538       | R01_cb18456_c7273/flp0/538      | R01_cb18456_c7273/flp0/538       | NA                              | NA                               |
| R01_cb16341_c12/flp0/647         | R01_cb16341_c12/flp0/647        | R01_cb16341_c12/flp0/647         | R01_cb16341_c12/flp0/647        | R01_cb16341_c12/flp0/647         |
| R01_cb8564_c4687/flp0/2736       | NA                              | R01_cb8564_c4687/flp0/2736       | NA                              | NA                               |
| R01_cb9610_c0/flp0/2033          | NA                              | NA                               | NA                              | R01_cb9610_c0/flp0/2033          |
| R01_cb16631_c0/flp0/565          | NA                              | R01_cb16631_c0/flp0/565          | NA                              | R01_cb16631_c0/flp0/565          |
| R01_cb7280_c3/f2p0/2696          | R01_cb7280_c3/f2p0/2696         | R01_cb7280_c3/f2p0/2696          | NA                              | NA                               |

|                             |                             |                             |                             |                             |
|-----------------------------|-----------------------------|-----------------------------|-----------------------------|-----------------------------|
| R01_cb16645_c54/flp0/709    | NA                          | R01_cb16645_c54/flp0/709    | NA                          | NA                          |
| R01_cb8564_c115836/flp0/220 | NA                          | R01_cb8564_c115836/flp0/220 | NA                          | R01_cb8564_c115836/flp0/220 |
| 6                           |                             | 6                           |                             | 6                           |
| R01_cb11734_c1/flp0/4290    | NA                          | R01_cb11734_c1/flp0/4290    | NA                          | NA                          |
| R01_cb16872_c9/flp0/753     | NA                          | R01_cb16872_c9/flp0/753     | NA                          | NA                          |
| R01_cb16098_c2/flp0/621     | R01_cb16098_c2/flp0/621     | R01_cb16098_c2/flp0/621     | R01_cb16098_c2/flp0/621     | R01_cb16098_c2/flp0/621     |
| R01_cb18645_c1/flp0/1684    | R01_cb18645_c1/flp0/1684    | R01_cb18645_c1/flp0/1684    | R01_cb18645_c1/flp0/1684    | R01_cb18645_c1/flp0/1684    |
| R01_cb14166_c0/f4p0/640     | R01_cb14166_c0/f4p0/640     | NA                          | R01_cb14166_c0/f4p0/640     | R01_cb14166_c0/f4p0/640     |
| R01_cb3536_c0/f2p0/1378     | NA                          | NA                          | NA                          | R01_cb3536_c0/f2p0/1378     |
| R01_cb8564_c22806/flp0/3041 | NA                          | R01_cb8564_c22806/flp0/3041 | NA                          | NA                          |
| R01_cb18409_c82/flp0/452    | NA                          | R01_cb18409_c82/flp0/452    | R01_cb18409_c82/flp0/452    | R01_cb18409_c82/flp0/452    |
| R01_cb8232_c0/flp0/2423     | NA                          | R01_cb8232_c0/flp0/2423     | R01_cb8232_c0/flp0/2423     | NA                          |
| R01_cb15371_c4/flp0/624     | NA                          | R01_cb15371_c4/flp0/624     | NA                          | NA                          |
| R01_cb18290_c4/flp0/617     | R01_cb18290_c4/flp0/617     | R01_cb18290_c4/flp0/617     | NA                          | NA                          |
| R01_cb5709_c2/flp0/2876     | NA                          | NA                          | NA                          | R01_cb5709_c2/flp0/2876     |
| R01_cb10045_c32/flp0/1369   | NA                          | R01_cb10045_c32/flp0/1369   | NA                          | NA                          |
| R01_cb8564_c43296/flp0/2175 | R01_cb8564_c43296/flp0/2175 | R01_cb8564_c43296/flp0/2175 | R01_cb8564_c43296/flp0/2175 | R01_cb8564_c43296/flp0/2175 |
|                             | 5                           |                             |                             |                             |
| R01_cb16250_c0/flp0/1742    | NA                          | R01_cb16250_c0/flp0/1742    | R01_cb16250_c0/flp0/1742    | R01_cb16250_c0/flp0/1742    |
| R01_cb18301_c9/flp0/645     | R01_cb18301_c9/flp0/645     | R01_cb18301_c9/flp0/645     | R01_cb18301_c9/flp0/645     | R01_cb18301_c9/flp0/645     |
| R01_cb8349_c56/flp0/446     | R01_cb8349_c56/flp0/446     | R01_cb8349_c56/flp0/446     | R01_cb8349_c56/flp0/446     | R01_cb8349_c56/flp0/446     |
| R01_cb6307_c27/flp0/3542    | NA                          | NA                          | NA                          | R01_cb6307_c27/flp0/3542    |
| R01_cb14968_c15/flp0/1687   | NA                          | NA                          | NA                          | R01_cb14968_c15/flp0/1687   |
| R01_cb13488_c3/flp0/575     | NA                          | R01_cb13488_c3/flp0/575     | NA                          | R01_cb13488_c3/flp0/575     |
| R01_cb8564_c107831/flp0/225 | NA                          | R01_cb8564_c107831/flp0/225 | R01_cb8564_c107831/flp0/225 | R01_cb8564_c107831/flp0/225 |
| 0                           |                             | 0                           | 0                           | 0                           |

|                             |                             |                             |                             |                             |
|-----------------------------|-----------------------------|-----------------------------|-----------------------------|-----------------------------|
| R01_cb8564_c88286/f1p0/2450 | NA                          | R01_cb8564_c88286/f1p0/2450 | R01_cb8564_c88286/f1p0/2450 | NA                          |
| R01_cb1228_c24/f1p1/2664    | NA                          | NA                          | NA                          | R01_cb1228_c24/f1p1/2664    |
| R01_cb16540_c0/f1p0/827     | NA                          | NA                          | R01_cb16540_c0/f1p0/827     | R01_cb16540_c0/f1p0/827     |
| R01_cb10114_c0/f1p0/1117    | NA                          | R01_cb10114_c0/f1p0/1117    | NA                          | NA                          |
| R01_cb2988_c9/f1p0/2293     | NA                          | NA                          | NA                          | R01_cb2988_c9/f1p0/2293     |
| R01_cb8688_c4/f1p0/2314     | NA                          | NA                          | NA                          | R01_cb8688_c4/f1p0/2314     |
| R01_cb13449_c7/f5p1/705     | NA                          | NA                          | NA                          | R01_cb13449_c7/f5p1/705     |
| R01_cb11553_c1/f1p0/2733    | R01_cb11553_c1/f1p0/2733    | R01_cb11553_c1/f1p0/2733    | R01_cb11553_c1/f1p0/2733    | NA                          |
| R01_cb5153_c7/f1p0/3152     | NA                          | R01_cb5153_c7/f1p0/3152     | NA                          | NA                          |
| R01_cb1473_c3/f1p0/2023     | NA                          | R01_cb1473_c3/f1p0/2023     | R01_cb1473_c3/f1p0/2023     | R01_cb1473_c3/f1p0/2023     |
| R01_cb13884_c11/f1p0/555    | R01_cb13884_c11/f1p0/555    | R01_cb13884_c11/f1p0/555    | R01_cb13884_c11/f1p0/555    | R01_cb13884_c11/f1p0/555    |
| R01_cb8564_c75327/f1p0/2046 | NA                          | R01_cb8564_c75327/f1p0/2046 | R01_cb8564_c75327/f1p0/2046 | R01_cb8564_c75327/f1p0/2046 |
| R01_cb18456_c7113/f1p0/485  | R01_cb18456_c7113/f1p0/485  | R01_cb18456_c7113/f1p0/485  | R01_cb18456_c7113/f1p0/485  | R01_cb18456_c7113/f1p0/485  |
| R01_cb7654_c3/f1p0/510      | NA                          | R01_cb7654_c3/f1p0/510      | NA                          | R01_cb7654_c3/f1p0/510      |
| R01_cb1599_c1/f1p0/2663     | NA                          | NA                          | NA                          | R01_cb1599_c1/f1p0/2663     |
| R01_cb8564_c2582/f1p0/2831  | NA                          | R01_cb8564_c2582/f1p0/2831  | NA                          | NA                          |
| R01_cb6398_c19/f1p0/1160    | NA                          | R01_cb6398_c19/f1p0/1160    | NA                          | NA                          |
| R01_cb8564_c71049/f2p0/2966 | R01_cb8564_c71049/f2p0/2966 | R01_cb8564_c71049/f2p0/2966 | R01_cb8564_c71049/f2p0/2966 | R01_cb8564_c71049/f2p0/2966 |
| R01_cb6666_c3/f2p0/2457     | NA                          | NA                          | NA                          | R01_cb6666_c3/f2p0/2457     |
| R01_cb11041_c6/f1p0/792     | NA                          | R01_cb11041_c6/f1p0/792     | NA                          | NA                          |
| R01_cb12496_c8/f1p0/338     | R01_cb12496_c8/f1p0/338     | R01_cb12496_c8/f1p0/338     | R01_cb12496_c8/f1p0/338     | R01_cb12496_c8/f1p0/338     |
| R01_cb18568_c0/f1p0/589     | R01_cb18568_c0/f1p0/589     | NA                          | NA                          | R01_cb18568_c0/f1p0/589     |
| R01_cb1259_c27/f1p0/2795    | NA                          | NA                          | NA                          | R01_cb1259_c27/f1p0/2795    |
| R01_cb5096_c1/f1p0/3169     | NA                          | R01_cb5096_c1/f1p0/3169     | NA                          | R01_cb5096_c1/f1p0/3169     |
| R01_cb15093_c4/f1p0/842     | NA                          | NA                          | NA                          | R01_cb15093_c4/f1p0/842     |

|                             |                             |                             |                           |                             |
|-----------------------------|-----------------------------|-----------------------------|---------------------------|-----------------------------|
| R01_cb18456_c4772/flp0/481  | R01_cb18456_c4772/flp0/481  | NA                          | NA                        | R01_cb18456_c4772/flp0/481  |
| R01_cb8564_c38983/flp0/3279 | R01_cb8564_c38983/flp0/3279 | R01_cb8564_c38983/flp0/3279 | NA                        | R01_cb8564_c38983/flp0/3279 |
| R01_cb10698_c1/flp0/4008    | NA                          | R01_cb10698_c1/flp0/4008    | NA                        | NA                          |
| R01_cb402_c23/flp1/2136     | NA                          | R01_cb402_c23/flp1/2136     | NA                        | R01_cb402_c23/flp1/2136     |
| R01_cb8564_c3607/flp0/2889  | NA                          | R01_cb8564_c3607/flp0/2889  | NA                        | NA                          |
| R01_cb1905_c15/flp0/3162    | NA                          | R01_cb1905_c15/flp0/3162    | R01_cb1905_c15/flp0/3162  | NA                          |
| R01_cb11101_c2/flp0/2288    | NA                          | R01_cb11101_c2/flp0/2288    | NA                        | NA                          |
| R01_cb7133_c2/flp0/2452     | NA                          | R01_cb7133_c2/flp0/2452     | NA                        | NA                          |
| R01_cb8564_c81521/f2p1/4466 | NA                          | R01_cb8564_c81521/f2p1/4466 | NA                        | NA                          |
| R01_cb4469_c0/f4p0/1536     | NA                          | NA                          | NA                        | R01_cb4469_c0/f4p0/1536     |
| R01_cb7842_c13/flp0/2319    | NA                          | R01_cb7842_c13/flp0/2319    | R01_cb7842_c13/flp0/2319  | NA                          |
| R01_cb10200_c5/flp0/767     | NA                          | R01_cb10200_c5/flp0/767     | NA                        | NA                          |
| R01_cb8564_c20866/f2p0/2614 | NA                          | R01_cb8564_c20866/f2p0/2614 | NA                        | R01_cb8564_c20866/f2p0/2614 |
| R01_cb8564_c85131/flp3/1987 | NA                          | R01_cb8564_c85131/flp3/1987 | NA                        | NA                          |
| R01_cb4614_c2/flp0/2134     | NA                          | R01_cb4614_c2/flp0/2134     | NA                        | NA                          |
| R01_cb12603_c10/flp0/1345   | NA                          | NA                          | R01_cb12603_c10/flp0/1345 | R01_cb12603_c10/flp0/1345   |
| R01_cb14186_c0/flp0/1114    | NA                          | R01_cb14186_c0/flp0/1114    | NA                        | NA                          |
| R01_cb12983_c18/flp0/577    | NA                          | R01_cb12983_c18/flp0/577    | R01_cb12983_c18/flp0/577  | R01_cb12983_c18/flp0/577    |
| R01_cb12512_c2/f2p3/1432    | NA                          | R01_cb12512_c2/f2p3/1432    | R01_cb12512_c2/f2p3/1432  | R01_cb12512_c2/f2p3/1432    |
| R01_cb12609_c1/flp0/776     | NA                          | NA                          | NA                        | R01_cb12609_c1/flp0/776     |
| R01_cb12722_c12/flp0/380    | R01_cb12722_c12/flp0/380    | R01_cb12722_c12/flp0/380    | NA                        | R01_cb12722_c12/flp0/380    |
| R01_cb2022_c10/flp0/2385    | NA                          | NA                          | NA                        | R01_cb2022_c10/flp0/2385    |
| R01_cb15807_c1/f2p0/754     | NA                          | NA                          | NA                        | R01_cb15807_c1/f2p0/754     |
| R01_cb10065_c2/flp0/2654    | NA                          | R01_cb10065_c2/flp0/2654    | NA                        | NA                          |
| R01_cb9682_c3/flp1/1949     | NA                          | NA                          | NA                        | R01_cb9682_c3/flp1/1949     |

|                              |                             |                             |                             |                              |
|------------------------------|-----------------------------|-----------------------------|-----------------------------|------------------------------|
| R01_cb16185_c1/flp0/1366     | R01_cb16185_c1/flp0/1366    | R01_cb16185_c1/flp0/1366    | R01_cb16185_c1/flp0/1366    | R01_cb16185_c1/flp0/1366     |
| R01_cb8564_c113160/flp0/2115 | NA                          | NA                          | NA                          | R01_cb8564_c113160/flp0/2115 |
| R01_cb18456_c1031/flp0/628   | NA                          | R01_cb18456_c1031/flp0/628  | NA                          | NA                           |
| R01_cb929_c3/flp0/2496       | NA                          | NA                          | NA                          | R01_cb929_c3/flp0/2496       |
| R01_cb2737_c43/flp0/3713     | NA                          | R01_cb2737_c43/flp0/3713    | NA                          | NA                           |
| R01_cb18456_c5921/flp0/708   | NA                          | R01_cb18456_c5921/flp0/708  | R01_cb18456_c5921/flp0/708  | R01_cb18456_c5921/flp0/708   |
| R01_cb3774_c22/flp0/3380     | NA                          | NA                          | NA                          | R01_cb3774_c22/flp0/3380     |
| R01_cb15207_c85/flp0/824     | NA                          | R01_cb15207_c85/flp0/824    | NA                          | NA                           |
| R01_cb7519_c15/flp1/728      | NA                          | NA                          | NA                          | R01_cb7519_c15/flp1/728      |
| R01_cb2773_c2/flp0/3812      | R01_cb2773_c2/flp0/3812     | R01_cb2773_c2/flp0/3812     | R01_cb2773_c2/flp0/3812     | R01_cb2773_c2/flp0/3812      |
| R01_cb15534_c10/flp0/568     | R01_cb15534_c10/flp0/568    | R01_cb15534_c10/flp0/568    | NA                          | NA                           |
| R01_cb17805_c0/f7p0/514      | R01_cb17805_c0/f7p0/514     | R01_cb17805_c0/f7p0/514     | NA                          | R01_cb17805_c0/f7p0/514      |
| R01_cb8564_c42802/flp0/4924  | NA                          | R01_cb8564_c42802/flp0/4924 | R01_cb8564_c42802/flp0/4924 | R01_cb8564_c42802/flp0/4924  |
| R01_cb8564_c24309/flp0/4229  | NA                          | R01_cb8564_c24309/flp0/4229 | NA                          | NA                           |
| R01_cb14152_c3/flp0/868      | NA                          | NA                          | NA                          | R01_cb14152_c3/flp0/868      |
| R01_cb9784_c2/flp0/1445      | R01_cb9784_c2/flp0/1445     | R01_cb9784_c2/flp0/1445     | R01_cb9784_c2/flp0/1445     | R01_cb9784_c2/flp0/1445      |
| R01_cb2936_c6/flp0/3561      | NA                          | R01_cb2936_c6/flp0/3561     | NA                          | NA                           |
| R01_cb12039_c0/fl14p0/423    | NA                          | R01_cb12039_c0/fl14p0/423   | R01_cb12039_c0/fl14p0/423   | R01_cb12039_c0/fl14p0/423    |
| R01_cb13760_c0/f9p1/1821     | NA                          | NA                          | NA                          | R01_cb13760_c0/f9p1/1821     |
| R01_cb8564_c85502/flp0/3131  | NA                          | R01_cb8564_c85502/flp0/3131 | R01_cb8564_c85502/flp0/3131 | R01_cb8564_c85502/flp0/3131  |
| R01_cb1342_c2/flp0/4368      | NA                          | R01_cb1342_c2/flp0/4368     | NA                          | NA                           |
| R01_cb8564_c34076/f3p0/2476  | R01_cb8564_c34076/f3p0/2476 | R01_cb8564_c34076/f3p0/2476 | R01_cb8564_c34076/f3p0/2476 | R01_cb8564_c34076/f3p0/2476  |
| R01_cb13603_c3/flp0/579      | R01_cb13603_c3/flp0/579     | R01_cb13603_c3/flp0/579     | R01_cb13603_c3/flp0/579     | R01_cb13603_c3/flp0/579      |
| R01_cb7802_c20/flp0/1296     | NA                          | NA                          | NA                          | R01_cb7802_c20/flp0/1296     |

|                             |                          |                             |                             |                             |
|-----------------------------|--------------------------|-----------------------------|-----------------------------|-----------------------------|
| R01_cb15615_c3/flp0/693     | NA                       | R01_cb15615_c3/flp0/693     | NA                          | NA                          |
| R01_cb9813_c27/flp0/1927    | NA                       | R01_cb9813_c27/flp0/1927    | NA                          | R01_cb9813_c27/flp0/1927    |
| R01_cb14448_c0/f5p0/594     | NA                       | NA                          | NA                          | R01_cb14448_c0/f5p0/594     |
| R01_cb12875_c1/flp0/642     | NA                       | R01_cb12875_c1/flp0/642     | R01_cb12875_c1/flp0/642     | R01_cb12875_c1/flp0/642     |
| R01_cb124_c36/flp0/2750     | NA                       | NA                          | NA                          | R01_cb124_c36/flp0/2750     |
| R01_cb3229_c19/flp0/2319    | NA                       | NA                          | NA                          | R01_cb3229_c19/flp0/2319    |
| R01_cb18192_c0/f3p0/468     | NA                       | R01_cb18192_c0/f3p0/468     | R01_cb18192_c0/f3p0/468     | NA                          |
| R01_cb12192_c1/f2p0/419     | R01_cb12192_c1/f2p0/419  | R01_cb12192_c1/f2p0/419     | NA                          | NA                          |
| R01_cb8564_c71665/f3p0/2489 | NA                       | R01_cb8564_c71665/f3p0/2489 | R01_cb8564_c71665/f3p0/2489 | R01_cb8564_c71665/f3p0/2489 |
| R01_cb9492_c1/flp0/1958     | NA                       | NA                          | R01_cb9492_c1/flp0/1958     | NA                          |
| R01_cb18476_c2/flp0/1221    | NA                       | NA                          | NA                          | R01_cb18476_c2/flp0/1221    |
| R01_cb7379_c5/flp0/2417     | NA                       | R01_cb7379_c5/flp0/2417     | NA                          | NA                          |
| R01_cb13146_c2/flp1/738     | NA                       | NA                          | R01_cb13146_c2/flp1/738     | R01_cb13146_c2/flp1/738     |
| R01_cb16078_c5/flp0/458     | R01_cb16078_c5/flp0/458  | R01_cb16078_c5/flp0/458     | R01_cb16078_c5/flp0/458     | NA                          |
| R01_cb18200_c0/flp0/535     | R01_cb18200_c0/flp0/535  | R01_cb18200_c0/flp0/535     | R01_cb18200_c0/flp0/535     | R01_cb18200_c0/flp0/535     |
| R01_cb13010_c2/flp0/1387    | NA                       | R01_cb13010_c2/flp0/1387    | NA                          | NA                          |
| R01_cb14558_c1/flp0/557     | NA                       | R01_cb14558_c1/flp0/557     | NA                          | NA                          |
| R01_cb4960_c5/flp0/2432     | NA                       | R01_cb4960_c5/flp0/2432     | R01_cb4960_c5/flp0/2432     | R01_cb4960_c5/flp0/2432     |
| R01_cb18630_c0/flp0/5566    | R01_cb18630_c0/flp0/5566 | R01_cb18630_c0/flp0/5566    | R01_cb18630_c0/flp0/5566    | R01_cb18630_c0/flp0/5566    |
| R01_cb13478_c2/f7p1/518     | NA                       | R01_cb13478_c2/f7p1/518     | R01_cb13478_c2/f7p1/518     | R01_cb13478_c2/f7p1/518     |
| R01_cb11686_c1/flp0/3017    | NA                       | NA                          | NA                          | R01_cb11686_c1/flp0/3017    |
| R01_cb8564_c73783/flp0/2163 | NA                       | R01_cb8564_c73783/flp0/2163 | NA                          | NA                          |
| R01_cb8564_c78748/flp0/3419 | NA                       | R01_cb8564_c78748/flp0/3419 | NA                          | NA                          |
| R01_cb8564_c19812/flp0/4646 | NA                       | R01_cb8564_c19812/flp0/4646 | R01_cb8564_c19812/flp0/4646 | R01_cb8564_c19812/flp0/4646 |
| R01_cb1969_c1/flp0/4106     | R01_cb1969_c1/flp0/4106  | R01_cb1969_c1/flp0/4106     | R01_cb1969_c1/flp0/4106     | NA                          |
| R01_cb10074_c8/flp1/3367    | NA                       | NA                          | NA                          | R01_cb10074_c8/flp1/3367    |

|                             |                            |                             |                             |                             |
|-----------------------------|----------------------------|-----------------------------|-----------------------------|-----------------------------|
| R01_cb8564_c69172/f2p0/2078 | NA                         | R01_cb8564_c69172/f2p0/2078 | R01_cb8564_c69172/f2p0/2078 | R01_cb8564_c69172/f2p0/2078 |
| R01_cb8564_c114168/f1p0/284 | NA                         | R01_cb8564_c114168/f1p0/284 | R01_cb8564_c114168/f1p0/284 | R01_cb8564_c114168/f1p0/284 |
| 9                           |                            | 9                           | 9                           | 9                           |
| R01_cb5042_c0/f2p0/2155     | NA                         | NA                          | R01_cb5042_c0/f2p0/2155     | NA                          |
| R01_cb13289_c4/f2p2/1680    | NA                         | R01_cb13289_c4/f2p2/1680    | R01_cb13289_c4/f2p2/1680    | NA                          |
| R01_cb17244_c1/f2p0/511     | R01_cb17244_c1/f2p0/511    | NA                          | NA                          | NA                          |
| R01_cb6534_c1/f1p0/2836     | NA                         | R01_cb6534_c1/f1p0/2836     | NA                          | NA                          |
| R01_cb11867_c3/f1p0/1755    | NA                         | R01_cb11867_c3/f1p0/1755    | NA                          | NA                          |
| R01_cb920_c22/f8p1/4290     | NA                         | NA                          | NA                          | R01_cb920_c22/f8p1/4290     |
| R01_cb8564_c778/f2p0/2111   | NA                         | R01_cb8564_c778/f2p0/2111   | R01_cb8564_c778/f2p0/2111   | R01_cb8564_c778/f2p0/2111   |
| R01_cb13433_c46/f1p0/2902   | NA                         | NA                          | NA                          | R01_cb13433_c46/f1p0/2902   |
| R01_cb10198_c0/f8p0/547     | NA                         | R01_cb10198_c0/f8p0/547     | NA                          | NA                          |
| R01_cb18462_c0/f2p0/965     | R01_cb18462_c0/f2p0/965    | R01_cb18462_c0/f2p0/965     | R01_cb18462_c0/f2p0/965     | R01_cb18462_c0/f2p0/965     |
| R01_cb11029_c0/f4p1/1072    | NA                         | NA                          | NA                          | R01_cb11029_c0/f4p1/1072    |
| R01_cb18456_c6878/f1p1/793  | NA                         | R01_cb18456_c6878/f1p1/793  | NA                          | NA                          |
| R01_cb7596_c2/f1p0/2917     | NA                         | R01_cb7596_c2/f1p0/2917     | R01_cb7596_c2/f1p0/2917     | R01_cb7596_c2/f1p0/2917     |
| R01_cb48_c12/f1p1/5066      | NA                         | NA                          | NA                          | R01_cb48_c12/f1p1/5066      |
| R01_cb5554_c1/f1p0/2350     | NA                         | R01_cb5554_c1/f1p0/2350     | R01_cb5554_c1/f1p0/2350     | NA                          |
| R01_cb8564_c20959/f1p0/3066 | NA                         | R01_cb8564_c20959/f1p0/3066 | NA                          | NA                          |
| R01_cb13037_c2/f1p0/1345    | NA                         | NA                          | R01_cb13037_c2/f1p0/1345    | R01_cb13037_c2/f1p0/1345    |
| R01_cb9643_c1/f1p0/2189     | NA                         | R01_cb9643_c1/f1p0/2189     | NA                          | NA                          |
| R01_cb17317_c1/f1p0/934     | R01_cb17317_c1/f1p0/934    | R01_cb17317_c1/f1p0/934     | NA                          | NA                          |
| R01_cb16125_c12/f1p0/823    | R01_cb16125_c12/f1p0/823   | R01_cb16125_c12/f1p0/823    | R01_cb16125_c12/f1p0/823    | R01_cb16125_c12/f1p0/823    |
| R01_cb18456_c5450/f1p2/667  | R01_cb18456_c5450/f1p2/667 | R01_cb18456_c5450/f1p2/667  | R01_cb18456_c5450/f1p2/667  | R01_cb18456_c5450/f1p2/667  |
| R01_cb8564_c121161/f1p0/475 | NA                         | R01_cb8564_c121161/f1p0/475 | NA                          | NA                          |
| 4                           |                            | 4                           |                             |                             |

|                                  |                          |                                  |                                  |                                  |
|----------------------------------|--------------------------|----------------------------------|----------------------------------|----------------------------------|
| R01_cb8650_c0/f3p0/2134          | R01_cb8650_c0/f3p0/2134  | R01_cb8650_c0/f3p0/2134          | R01_cb8650_c0/f3p0/2134          | NA                               |
| R01_cb11228_c2/flp1/2322         | R01_cb11228_c2/flp1/2322 | NA                               | NA                               | NA                               |
| R01_cb3046_c0/f6p0/2414          | NA                       | NA                               | NA                               | R01_cb3046_c0/f6p0/2414          |
| R01_cb4269_c6/flp0/3009          | NA                       | NA                               | NA                               | R01_cb4269_c6/flp0/3009          |
| R01_cb10375_c6/flp1/1556         | NA                       | NA                               | NA                               | R01_cb10375_c6/flp1/1556         |
| R01_cb2803_c5/flp0/2932          | NA                       | R01_cb2803_c5/flp0/2932          | NA                               | NA                               |
| R01_cb17756_c8/flp0/818          | R01_cb17756_c8/flp0/818  | R01_cb17756_c8/flp0/818          | R01_cb17756_c8/flp0/818          | R01_cb17756_c8/flp0/818          |
| R01_cb5122_c11/flp0/3059         | NA                       | NA                               | NA                               | R01_cb5122_c11/flp0/3059         |
| R01_cb8564_c66851/f4p0/2051      | NA                       | NA                               | NA                               | R01_cb8564_c66851/f4p0/2051      |
| R01_cb11029_c2/flp0/2559         | NA                       | R01_cb11029_c2/flp0/2559         | NA                               | NA                               |
| R01_cb2033_c17/flp0/2200         | NA                       | NA                               | NA                               | R01_cb2033_c17/flp0/2200         |
| R01_cb8564_c85279/flp0/3482      | NA                       | NA                               | NA                               | R01_cb8564_c85279/flp0/3482      |
| R01_cb10138_c7/flp1/1451         | NA                       | R01_cb10138_c7/flp1/1451         | R01_cb10138_c7/flp1/1451         | R01_cb10138_c7/flp1/1451         |
| R01_cb10970_c0/f2p0/1446         | NA                       | NA                               | NA                               | R01_cb10970_c0/f2p0/1446         |
| R01_cb8564_c46882/flp0/2937      | NA                       | R01_cb8564_c46882/flp0/2937      | R01_cb8564_c46882/flp0/2937      | NA                               |
| R01_cb8564_c83850/flp0/2010      | NA                       | R01_cb8564_c83850/flp0/2010      | NA                               | NA                               |
| R01_cb8564_c1090/flp0/2642       | NA                       | R01_cb8564_c1090/flp0/2642       | NA                               | NA                               |
| R01_cb8823_c9/flp0/1972          | NA                       | NA                               | NA                               | R01_cb8823_c9/flp0/1972          |
| R01_cb11606_c0/flp0/1753         | NA                       | R01_cb11606_c0/flp0/1753         | NA                               | NA                               |
| R01_cb10383_c1/flp0/2490         | NA                       | R01_cb10383_c1/flp0/2490         | R01_cb10383_c1/flp0/2490         | R01_cb10383_c1/flp0/2490         |
| R01_cb8564_c122781/flp0/248<br>6 | NA                       | R01_cb8564_c122781/flp0/248<br>6 | R01_cb8564_c122781/flp0/248<br>6 | R01_cb8564_c122781/flp0/248<br>6 |
| R01_cb4037_c1/flp0/3449          | R01_cb4037_c1/flp0/3449  | R01_cb4037_c1/flp0/3449          | NA                               | R01_cb4037_c1/flp0/3449          |
| R01_cb15811_c27/flp0/1080        | NA                       | R01_cb15811_c27/flp0/1080        | R01_cb15811_c27/flp0/1080        | R01_cb15811_c27/flp0/1080        |
| R01_cb8564_c42354/flp0/3356      | NA                       | NA                               | NA                               | R01_cb8564_c42354/flp0/3356      |
| R01_cb8564_c112394/flp0/233      | NA                       | R01_cb8564_c112394/flp0/233      | NA                               | NA                               |



|                             |                             |                             |                             |                             |
|-----------------------------|-----------------------------|-----------------------------|-----------------------------|-----------------------------|
| 6                           |                             | 6                           |                             |                             |
| R01_cb8951_c6/flp1/1756     | NA                          | R01_cb8951_c6/flp1/1756     | NA                          | NA                          |
| R01_cb14656_c3/flp3/575     | R01_cb14656_c3/flp3/575     | R01_cb14656_c3/flp3/575     | NA                          | NA                          |
| R01_cb2843_c7/flp0/4056     | NA                          | NA                          | NA                          | R01_cb2843_c7/flp0/4056     |
| R01_cb2875_c13/flp1/2551    | NA                          | NA                          | NA                          | R01_cb2875_c13/flp1/2551    |
| R01_cb8564_c114122/flp0/247 | NA                          | R01_cb8564_c114122/flp0/247 | R01_cb8564_c114122/flp0/247 | R01_cb8564_c114122/flp0/247 |
| 0                           |                             | 0                           | 0                           | 0                           |
| R01_cb16881_c2/flp0/696     | NA                          | NA                          | NA                          | R01_cb16881_c2/flp0/696     |
| R01_cb7334_c12/f6p0/1866    | NA                          | NA                          | NA                          | R01_cb7334_c12/f6p0/1866    |
| R01_cb5758_c0/flp0/3020     | NA                          | R01_cb5758_c0/flp0/3020     | R01_cb5758_c0/flp0/3020     | R01_cb5758_c0/flp0/3020     |
| R01_cb5900_c106/flp0/2045   | NA                          | R01_cb5900_c106/flp0/2045   | NA                          | R01_cb5900_c106/flp0/2045   |
| R01_cb8564_c44173/flp0/2802 | R01_cb8564_c44173/flp0/2802 | R01_cb8564_c44173/flp0/2802 | R01_cb8564_c44173/flp0/2802 | R01_cb8564_c44173/flp0/2802 |
| R01_cb8564_c76105/flp0/3001 | NA                          | R01_cb8564_c76105/flp0/3001 | NA                          | NA                          |
| R01_cb8660_c12/flp0/1891    | NA                          | NA                          | NA                          | R01_cb8660_c12/flp0/1891    |
| R01_cb3516_c1/flp0/3607     | NA                          | NA                          | NA                          | R01_cb3516_c1/flp0/3607     |
| R01_cb6547_c5/flp0/2728     | NA                          | NA                          | NA                          | R01_cb6547_c5/flp0/2728     |
| R01_cb15951_c2/flp0/1885    | NA                          | R01_cb15951_c2/flp0/1885    | NA                          | NA                          |
| R01_cb2870_c3/flp1/3794     | NA                          | NA                          | NA                          | R01_cb2870_c3/flp1/3794     |
| R01_cb4443_c1/flp0/3343     | NA                          | R01_cb4443_c1/flp0/3343     | NA                          | NA                          |
| R01_cb15093_c0/f4p2/1881    | NA                          | NA                          | NA                          | R01_cb15093_c0/f4p2/1881    |
| R01_cb7184_c9/flp0/410      | R01_cb7184_c9/flp0/410      | R01_cb7184_c9/flp0/410      | NA                          | R01_cb7184_c9/flp0/410      |
| R01_cb6198_c1/flp0/2650     | NA                          | R01_cb6198_c1/flp0/2650     | NA                          | R01_cb6198_c1/flp0/2650     |
| R01_cb10923_c3/flp0/626     | NA                          | NA                          | NA                          | R01_cb10923_c3/flp0/626     |
| R01_cb4639_c2/flp0/3298     | NA                          | NA                          | NA                          | R01_cb4639_c2/flp0/3298     |
| R01_cb11431_c2/flp0/1126    | NA                          | NA                          | NA                          | R01_cb11431_c2/flp0/1126    |

|                             |                             |                             |                          |                             |
|-----------------------------|-----------------------------|-----------------------------|--------------------------|-----------------------------|
| R01_cb8564_c20664/f3p4/3119 | NA                          | NA                          | NA                       | R01_cb8564_c20664/f3p4/3119 |
| R01_cb11676_c1/f1p0/2624    | NA                          | NA                          | NA                       | R01_cb11676_c1/f1p0/2624    |
| R01_cb2243_c3/f1p0/5429     | NA                          | NA                          | NA                       | R01_cb2243_c3/f1p0/5429     |
| R01_cb5558_c2/f1p0/2901     | NA                          | R01_cb5558_c2/f1p0/2901     | NA                       | R01_cb5558_c2/f1p0/2901     |
| R01_cb822_c10/f2p0/2473     | NA                          | NA                          | NA                       | R01_cb822_c10/f2p0/2473     |
| R01_cb8564_c78923/f1p0/3273 | NA                          | NA                          | NA                       | R01_cb8564_c78923/f1p0/3273 |
| R01_cb17053_c3/f2p0/756     | NA                          | R01_cb17053_c3/f2p0/756     | NA                       | R01_cb17053_c3/f2p0/756     |
| R01_cb18456_c3707/f1p0/926  | NA                          | NA                          | NA                       | R01_cb18456_c3707/f1p0/926  |
| R01_cb6452_c12/f1p0/1361    | NA                          | NA                          | NA                       | R01_cb6452_c12/f1p0/1361    |
| R01_cb8564_c54019/f1p1/2940 | NA                          | R01_cb8564_c54019/f1p1/2940 | NA                       | NA                          |
| R01_cb10441_c2/f1p0/2219    | NA                          | R01_cb10441_c2/f1p0/2219    | NA                       | NA                          |
| R01_cb16120_c0/f3p0/1061    | NA                          | R01_cb16120_c0/f3p0/1061    | R01_cb16120_c0/f3p0/1061 | R01_cb16120_c0/f3p0/1061    |
| R01_cb12786_c13/f1p0/571    | NA                          | NA                          | NA                       | R01_cb12786_c13/f1p0/571    |
| R01_cb1207_c6/f1p0/2380     | NA                          | NA                          | NA                       | R01_cb1207_c6/f1p0/2380     |
| R01_cb5921_c53/f1p0/1605    | NA                          | NA                          | NA                       | R01_cb5921_c53/f1p0/1605    |
| R01_cb9788_c53/f1p0/1645    | NA                          | R01_cb9788_c53/f1p0/1645    | NA                       | NA                          |
| R01_cb6238_c8/f1p0/2406     | NA                          | R01_cb6238_c8/f1p0/2406     | NA                       | NA                          |
| R01_cb10917_c2/f1p0/2295    | NA                          | R01_cb10917_c2/f1p0/2295    | NA                       | NA                          |
| R01_cb2048_c12/f1p0/1302    | NA                          | R01_cb2048_c12/f1p0/1302    | NA                       | NA                          |
| R01_cb8564_c148506/f1p1/216 | NA                          | R01_cb8564_c148506/f1p1/216 | NA                       | NA                          |
| 1                           |                             | 1                           |                          |                             |
| R01_cb13563_c1/f1p0/985     | NA                          | R01_cb13563_c1/f1p0/985     | NA                       | NA                          |
| R01_cb2692_c9/f1p0/687      | R01_cb2692_c9/f1p0/687      | NA                          | NA                       | NA                          |
| R01_cb12740_c13/f1p0/467    | R01_cb12740_c13/f1p0/467    | R01_cb12740_c13/f1p0/467    | NA                       | NA                          |
| R01_cb8564_c92286/f1p0/2973 | R01_cb8564_c92286/f1p0/2973 | NA                          | NA                       | NA                          |
| 3                           |                             |                             |                          |                             |

|                             |                           |                             |                             |                             |
|-----------------------------|---------------------------|-----------------------------|-----------------------------|-----------------------------|
| R01_cb17239_c0/flp0/1574    | NA                        | R01_cb17239_c0/flp0/1574    | NA                          | NA                          |
| R01_cb6591_c16/fl14p1/664   | R01_cb6591_c16/fl14p1/664 | R01_cb6591_c16/fl14p1/664   | NA                          | NA                          |
| R01_cb17887_c1/flp0/1240    | NA                        | NA                          | NA                          | R01_cb17887_c1/flp0/1240    |
| R01_cb3307_c4/f2p0/2996     | NA                        | NA                          | NA                          | R01_cb3307_c4/f2p0/2996     |
| R01_cb10252_c2/flp0/802     | R01_cb10252_c2/flp0/802   | R01_cb10252_c2/flp0/802     | NA                          | NA                          |
| R01_cb13427_c2/flp0/657     | NA                        | NA                          | R01_cb13427_c2/flp0/657     | R01_cb13427_c2/flp0/657     |
| R01_cb3483_c3/f6p0/2856     | NA                        | NA                          | NA                          | R01_cb3483_c3/f6p0/2856     |
| R01_cb14576_c2/flp0/948     | NA                        | NA                          | NA                          | R01_cb14576_c2/flp0/948     |
| R01_cb12837_c14/flp0/669    | NA                        | R01_cb12837_c14/flp0/669    | NA                          | NA                          |
| R01_cb8102_c6/flp2/2413     | NA                        | NA                          | NA                          | R01_cb8102_c6/flp2/2413     |
| R01_cb14792_c0/flp0/576     | NA                        | R01_cb14792_c0/flp0/576     | NA                          | NA                          |
| R01_cb15672_c0/flp0/1373    | NA                        | NA                          | NA                          | R01_cb15672_c0/flp0/1373    |
| R01_cb6530_c81/flp0/895     | NA                        | NA                          | NA                          | R01_cb6530_c81/flp0/895     |
| R01_cb8564_c86518/flp0/2868 | NA                        | R01_cb8564_c86518/flp0/2868 | NA                          | NA                          |
| R01_cb8564_c21204/flp5/3369 | NA                        | R01_cb8564_c21204/flp5/3369 | NA                          | R01_cb8564_c21204/flp5/3369 |
| R01_cb16428_c0/flp0/954     | R01_cb16428_c0/flp0/954   | R01_cb16428_c0/flp0/954     | R01_cb16428_c0/flp0/954     | NA                          |
| R01_cb17266_c17/flp0/1336   | NA                        | R01_cb17266_c17/flp0/1336   | NA                          | NA                          |
| R01_cb4732_c1/flp0/3141     | NA                        | NA                          | NA                          | R01_cb4732_c1/flp0/3141     |
| R01_cb8564_c80052/flp0/2362 | NA                        | R01_cb8564_c80052/flp0/2362 | R01_cb8564_c80052/flp0/2362 | R01_cb8564_c80052/flp0/2362 |
| R01_cb17016_c2/flp0/1330    | NA                        | NA                          | NA                          | R01_cb17016_c2/flp0/1330    |
| R01_cb15714_c1/f6p0/677     | NA                        | R01_cb15714_c1/f6p0/677     | NA                          | NA                          |
| R01_cb5533_c106/flp0/3274   | NA                        | R01_cb5533_c106/flp0/3274   | NA                          | NA                          |
| R01_cb17989_c0/f2p0/1560    | NA                        | R01_cb17989_c0/f2p0/1560    | R01_cb17989_c0/f2p0/1560    | NA                          |
| R01_cb17102_c1/flp1/502     | NA                        | R01_cb17102_c1/flp1/502     | R01_cb17102_c1/flp1/502     | R01_cb17102_c1/flp1/502     |
| R01_cb17035_c0/f2p1/829     | NA                        | NA                          | NA                          | R01_cb17035_c0/f2p1/829     |
| R01_cb12487_c8/flp0/1681    | NA                        | R01_cb12487_c8/flp0/1681    | NA                          | NA                          |

|                             |                                  |                             |                             |                             |
|-----------------------------|----------------------------------|-----------------------------|-----------------------------|-----------------------------|
| R01_cb8564_c78035/f1p0/2846 | NA                               | NA                          | NA                          | R01_cb8564_c78035/f1p0/2846 |
| R01_cb8564_c80007/f1p0/4408 | NA                               | R01_cb8564_c80007/f1p0/4408 | R01_cb8564_c80007/f1p0/4408 | R01_cb8564_c80007/f1p0/4408 |
| R01_cb8564_c88788/f1p0/1896 | NA                               | R01_cb8564_c88788/f1p0/1896 | NA                          | NA                          |
| R01_cb5681_c1/f1p0/3077     | NA                               | NA                          | NA                          | R01_cb5681_c1/f1p0/3077     |
| R01_cb8564_c85912/f1p1/2858 | NA                               | R01_cb8564_c85912/f1p1/2858 | NA                          | NA                          |
| R01_cb3750_c6/f2p0/2746     | NA                               | NA                          | NA                          | R01_cb3750_c6/f2p0/2746     |
| R01_cb13101_c2/f1p0/1390    | R01_cb13101_c2/f1p0/1390         | NA                          | NA                          | R01_cb13101_c2/f1p0/1390    |
| R01_cb14286_c5/f1p0/1067    | R01_cb14286_c5/f1p0/1067         | R01_cb14286_c5/f1p0/1067    | NA                          | R01_cb14286_c5/f1p0/1067    |
| R01_cb14283_c4/f1p2/713     | R01_cb14283_c4/f1p2/713          | R01_cb14283_c4/f1p2/713     | R01_cb14283_c4/f1p2/713     | NA                          |
| R01_cb11614_c2/f1p0/930     | NA                               | NA                          | NA                          | R01_cb11614_c2/f1p0/930     |
| R01_cb17221_c1/f2p0/1003    | NA                               | R01_cb17221_c1/f2p0/1003    | NA                          | R01_cb17221_c1/f2p0/1003    |
| R01_cb8564_c69101/f2p0/2723 | NA                               | NA                          | NA                          | R01_cb8564_c69101/f2p0/2723 |
| R01_cb18261_c0/f1p0/788     | R01_cb18261_c0/f1p0/788          | NA                          | NA                          | NA                          |
| R01_cb11722_c0/f2p0/840     | NA                               | NA                          | NA                          | R01_cb11722_c0/f2p0/840     |
| R01_cb12003_c146/f1p0/831   | NA                               | R01_cb12003_c146/f1p0/831   | R01_cb12003_c146/f1p0/831   | NA                          |
| R01_cb9611_c6/f1p0/2498     | NA                               | R01_cb9611_c6/f1p0/2498     | NA                          | NA                          |
| R01_cb16098_c0/f1p0/779     | R01_cb16098_c0/f1p0/779          | R01_cb16098_c0/f1p0/779     | R01_cb16098_c0/f1p0/779     | R01_cb16098_c0/f1p0/779     |
| R01_cb8564_c12085/f1p0/2304 | R01_cb8564_c12085/f1p0/2304<br>4 | R01_cb8564_c12085/f1p0/2304 | NA                          | R01_cb8564_c12085/f1p0/2304 |
| R01_cb16555_c2/f1p1/514     | NA                               | NA                          | NA                          | R01_cb16555_c2/f1p1/514     |
| R01_cb14502_c20/f1p0/451    | R01_cb14502_c20/f1p0/451         | R01_cb14502_c20/f1p0/451    | R01_cb14502_c20/f1p0/451    | NA                          |
| R01_cb17996_c2/f2p1/694     | NA                               | NA                          | NA                          | R01_cb17996_c2/f2p1/694     |
| R01_cb5790_c0/f4p0/1266     | NA                               | NA                          | NA                          | R01_cb5790_c0/f4p0/1266     |
| R01_cb18385_c1/f1p0/1882    | NA                               | R01_cb18385_c1/f1p0/1882    | NA                          | NA                          |
| R01_cb15730_c9/f2p0/617     | NA                               | NA                          | NA                          | R01_cb15730_c9/f2p0/617     |
| R01_cb8564_c112543/f1p0/217 | NA                               | R01_cb8564_c112543/f1p0/217 | NA                          | NA                          |

|                             |                             |                             |                             |                             |  |
|-----------------------------|-----------------------------|-----------------------------|-----------------------------|-----------------------------|--|
| 3                           |                             | 3                           |                             |                             |  |
| R01_cb8564_c25562/f4p3/4181 | NA                          | NA                          | NA                          | R01_cb8564_c25562/f4p3/4181 |  |
| R01_cb15797_c2/flp0/1502    | NA                          | NA                          | NA                          | R01_cb15797_c2/flp0/1502    |  |
| R01_cb8564_c123295/flp0/226 | R01_cb8564_c123295/flp0/226 | R01_cb8564_c123295/flp0/226 | R01_cb8564_c123295/flp0/226 | R01_cb8564_c123295/flp0/226 |  |
| 3                           | 63                          | 3                           | 3                           | 3                           |  |
| R01_cb977_c0/f2p0/3854      | NA                          | NA                          | NA                          | R01_cb977_c0/f2p0/3854      |  |
| R01_cb12946_c10/flp0/616    | NA                          | R01_cb12946_c10/flp0/616    | NA                          | NA                          |  |
| R01_cb8946_c3/f2p0/2196     | NA                          | NA                          | NA                          | R01_cb8946_c3/f2p0/2196     |  |
| R01_cb18456_c7641/flp0/395  | R01_cb18456_c7641/flp0/395  | R01_cb18456_c7641/flp0/395  | R01_cb18456_c7641/flp0/395  | R01_cb18456_c7641/flp0/395  |  |
| R01_cb11131_c2/flp0/2518    | NA                          | NA                          | NA                          | R01_cb11131_c2/flp0/2518    |  |
| R01_cb8564_c81461/flp1/2199 | NA                          | R01_cb8564_c81461/flp1/2199 | R01_cb8564_c81461/flp1/2199 | R01_cb8564_c81461/flp1/2199 |  |
| R01_cb8564_c115526/flp0/237 | NA                          | R01_cb8564_c115526/flp0/237 | R01_cb8564_c115526/flp0/237 | R01_cb8564_c115526/flp0/237 |  |
| 7                           |                             | 7                           | 7                           | 7                           |  |
| R01_cb3584_c3/flp0/2151     | NA                          | R01_cb3584_c3/flp0/2151     | NA                          | R01_cb3584_c3/flp0/2151     |  |
| R01_cb8324_c7/flp0/1415     | NA                          | NA                          | NA                          | R01_cb8324_c7/flp0/1415     |  |
| R01_cb13938_c17/flp0/1419   | NA                          | NA                          | NA                          | R01_cb13938_c17/flp0/1419   |  |
| R01_cb1178_c4/f2p0/1928     | NA                          | NA                          | NA                          | R01_cb1178_c4/f2p0/1928     |  |
| R01_cb8564_c18198/flp0/2953 | NA                          | R01_cb8564_c18198/flp0/2953 | NA                          | NA                          |  |
| R01_cb16839_c0/flp0/1757    | NA                          | NA                          | NA                          | R01_cb16839_c0/flp0/1757    |  |
| R01_cb8564_c49143/flp0/4983 | NA                          | R01_cb8564_c49143/flp0/4983 | NA                          | R01_cb8564_c49143/flp0/4983 |  |
| R01_cb6427_c1/flp0/3055     | NA                          | NA                          | NA                          | R01_cb6427_c1/flp0/3055     |  |
| R01_cb9448_c12/flp1/1731    | NA                          | NA                          | NA                          | R01_cb9448_c12/flp1/1731    |  |
| R01_cb18456_c1378/f3p0/559  | R01_cb18456_c1378/f3p0/559  | R01_cb18456_c1378/f3p0/559  | R01_cb18456_c1378/f3p0/559  | R01_cb18456_c1378/f3p0/559  |  |
| R01_cb2682_c6/f5p1/3358     | NA                          | NA                          | NA                          | R01_cb2682_c6/f5p1/3358     |  |
| R01_cb8564_c37875/flp1/2576 | NA                          | R01_cb8564_c37875/flp1/2576 | NA                          | R01_cb8564_c37875/flp1/2576 |  |
| R01_cb10971_c0/flp1/1867    | NA                          | NA                          | R01_cb10971_c0/flp1/1867    | NA                          |  |

|                                  |                                   |                                  |                                  |                                  |
|----------------------------------|-----------------------------------|----------------------------------|----------------------------------|----------------------------------|
| R01_cb3359_c27/flp0/2765         | NA                                | R01_cb3359_c27/flp0/2765         | NA                               | NA                               |
| R01_cb7194_c3/flp0/2677          | NA                                | R01_cb7194_c3/flp0/2677          | NA                               | NA                               |
| R01_cb3545_c19/flp0/1377         | NA                                | NA                               | NA                               | R01_cb3545_c19/flp0/1377         |
| R01_cb12421_c58/flp0/574         | NA                                | R01_cb12421_c58/flp0/574         | NA                               | NA                               |
| R01_cb124_c41/flp0/3234          | NA                                | NA                               | NA                               | R01_cb124_c41/flp0/3234          |
| R01_cb7114_c1/f4p1/1447          | NA                                | NA                               | NA                               | R01_cb7114_c1/f4p1/1447          |
| R01_cb9750_c5/flp0/1899          | NA                                | NA                               | NA                               | R01_cb9750_c5/flp0/1899          |
| R01_cb10032_c2/flp0/3742         | NA                                | R01_cb10032_c2/flp0/3742         | NA                               | R01_cb10032_c2/flp0/3742         |
| R01_cb6931_c2/f2p0/2369          | NA                                | NA                               | NA                               | R01_cb6931_c2/f2p0/2369          |
| R01_cb17383_c1/flp0/1097         | NA                                | NA                               | NA                               | R01_cb17383_c1/flp0/1097         |
| R01_cb6706_c2/f3p0/1609          | NA                                | NA                               | NA                               | R01_cb6706_c2/f3p0/1609          |
| R01_cb3744_c16/flp0/2234         | NA                                | NA                               | NA                               | R01_cb3744_c16/flp0/2234         |
| R01_cb3046_c8/flp0/2508          | NA                                | NA                               | NA                               | R01_cb3046_c8/flp0/2508          |
| R01_cb8564_c42583/flp0/1936      | NA                                | R01_cb8564_c42583/flp0/1936      | NA                               | R01_cb8564_c42583/flp0/1936      |
| R01_cb610_c2/flp0/3227           | NA                                | NA                               | NA                               | R01_cb610_c2/flp0/3227           |
| R01_cb14596_c0/flp0/375          | R01_cb14596_c0/flp0/375           | R01_cb14596_c0/flp0/375          | R01_cb14596_c0/flp0/375          | R01_cb14596_c0/flp0/375          |
| R01_cb8564_c127989/flp0/226<br>3 | R01_cb8564_c127989/flp0/226<br>63 | R01_cb8564_c127989/flp0/226<br>3 | R01_cb8564_c127989/flp0/226<br>3 | R01_cb8564_c127989/flp0/226<br>3 |
| R01_cb8564_c17183/flp0/2176      | R01_cb8564_c17183/flp0/217<br>6   | R01_cb8564_c17183/flp0/2176      | R01_cb8564_c17183/flp0/2176      | R01_cb8564_c17183/flp0/2176      |
| R01_cb3426_c23/flp0/3049         | NA                                | NA                               | NA                               | R01_cb3426_c23/flp0/3049         |
| R01_cb14166_c2/flp0/684          | NA                                | NA                               | R01_cb14166_c2/flp0/684          | R01_cb14166_c2/flp0/684          |
| R01_cb6654_c0/f2p0/777           | NA                                | R01_cb6654_c0/f2p0/777           | NA                               | NA                               |
| R01_cb8564_c74522/f2p3/2461      | NA                                | R01_cb8564_c74522/f2p3/2461      | R01_cb8564_c74522/f2p3/2461      | R01_cb8564_c74522/f2p3/2461      |
| R01_cb15460_c1/f2p0/474          | R01_cb15460_c1/f2p0/474           | R01_cb15460_c1/f2p0/474          | R01_cb15460_c1/f2p0/474          | R01_cb15460_c1/f2p0/474          |
| R01_cb13137_c10/flp0/601         | R01_cb13137_c10/flp0/601          | R01_cb13137_c10/flp0/601         | R01_cb13137_c10/flp0/601         | R01_cb13137_c10/flp0/601         |

|                             |                          |                             |                             |                             |
|-----------------------------|--------------------------|-----------------------------|-----------------------------|-----------------------------|
| R01_cb13766_c9/flp0/363     | R01_cb13766_c9/flp0/363  | R01_cb13766_c9/flp0/363     | NA                          | NA                          |
| R01_cb12785_c26/flp0/1428   | NA                       | NA                          | R01_cb12785_c26/flp0/1428   | R01_cb12785_c26/flp0/1428   |
| R01_cb8564_c4480/flp0/2899  | NA                       | NA                          | NA                          | R01_cb8564_c4480/flp0/2899  |
| R01_cb9643_c3/flp0/1558     | R01_cb9643_c3/flp0/1558  | R01_cb9643_c3/flp0/1558     | R01_cb9643_c3/flp0/1558     | R01_cb9643_c3/flp0/1558     |
| R01_cb11150_c1/flp0/1860    | NA                       | R01_cb11150_c1/flp0/1860    | NA                          | NA                          |
| R01_cb4951_c4/flp0/1904     | NA                       | R01_cb4951_c4/flp0/1904     | NA                          | NA                          |
| R01_cb18660_c1/flp0/357     | R01_cb18660_c1/flp0/357  | R01_cb18660_c1/flp0/357     | R01_cb18660_c1/flp0/357     | R01_cb18660_c1/flp0/357     |
| R01_cb8564_c71907/flp0/3048 | NA                       | R01_cb8564_c71907/flp0/3048 | NA                          | NA                          |
| R01_cb2367_c7/flp0/767      | R01_cb2367_c7/flp0/767   | R01_cb2367_c7/flp0/767      | R01_cb2367_c7/flp0/767      | R01_cb2367_c7/flp0/767      |
| R01_cb2082_c12/flp0/2788    | NA                       | NA                          | NA                          | R01_cb2082_c12/flp0/2788    |
| R01_cb14660_c3/flp0/1416    | R01_cb14660_c3/flp0/1416 | R01_cb14660_c3/flp0/1416    | NA                          | R01_cb14660_c3/flp0/1416    |
| R01_cb5948_c9/flp1/2969     | NA                       | NA                          | NA                          | R01_cb5948_c9/flp1/2969     |
| R01_cb10980_c2/flp0/681     | R01_cb10980_c2/flp0/681  | NA                          | R01_cb10980_c2/flp0/681     | R01_cb10980_c2/flp0/681     |
| R01_cb2351_c1/flp0/3788     | NA                       | R01_cb2351_c1/flp0/3788     | NA                          | NA                          |
| R01_cb567_c8/flp0/3388      | NA                       | R01_cb567_c8/flp0/3388      | NA                          | NA                          |
| R01_cb15417_c1/flp0/772     | NA                       | R01_cb15417_c1/flp0/772     | R01_cb15417_c1/flp0/772     | NA                          |
| R01_cb8564_c44027/flp0/2617 | NA                       | R01_cb8564_c44027/flp0/2617 | R01_cb8564_c44027/flp0/2617 | R01_cb8564_c44027/flp0/2617 |
| R01_cb9648_c2/f2p0/686      | NA                       | NA                          | NA                          | R01_cb9648_c2/f2p0/686      |
| R01_cb5358_c1/flp0/3589     | NA                       | R01_cb5358_c1/flp0/3589     | NA                          | NA                          |
| R01_cb8564_c130375/flp0/191 | NA                       | R01_cb8564_c130375/flp0/191 | R01_cb8564_c130375/flp0/191 | NA                          |
| 1                           |                          | 1                           | 1                           |                             |
| R01_cb2088_c3/flp0/3560     | NA                       | NA                          | NA                          | R01_cb2088_c3/flp0/3560     |
| R01_cb7419_c11/flp1/2569    | NA                       | NA                          | NA                          | R01_cb7419_c11/flp1/2569    |
| R01_cb438_c3/flp0/3438      | NA                       | R01_cb438_c3/flp0/3438      | NA                          | R01_cb438_c3/flp0/3438      |
| R01_cb2807_c1/flp0/3693     | NA                       | R01_cb2807_c1/flp0/3693     | R01_cb2807_c1/flp0/3693     | R01_cb2807_c1/flp0/3693     |
| R01_cb18456_c7550/flp0/1776 | NA                       | NA                          | R01_cb18456_c7550/flp0/1776 | R01_cb18456_c7550/flp0/1776 |

|                              |                         |                              |                          |                           |
|------------------------------|-------------------------|------------------------------|--------------------------|---------------------------|
| R01_cb17700_c1/flp0/1131     | NA                      | R01_cb17700_c1/flp0/1131     | R01_cb17700_c1/flp0/1131 | R01_cb17700_c1/flp0/1131  |
| R01_cb12480_c9/flp0/843      | NA                      | NA                           | R01_cb12480_c9/flp0/843  | NA                        |
| R01_cb1155_c5/flp0/2631      | NA                      | NA                           | NA                       | R01_cb1155_c5/flp0/2631   |
| R01_cb11219_c2/flp0/2877     | NA                      | R01_cb11219_c2/flp0/2877     | NA                       | NA                        |
| R01_cb7535_c8/flp0/2595      | R01_cb7535_c8/flp0/2595 | R01_cb7535_c8/flp0/2595      | NA                       | R01_cb7535_c8/flp0/2595   |
| R01_cb2445_c8/f2p0/3318      | NA                      | NA                           | NA                       | R01_cb2445_c8/f2p0/3318   |
| R01_cb15725_c10/f2p0/1431    | NA                      | NA                           | NA                       | R01_cb15725_c10/f2p0/1431 |
| R01_cb18135_c1/flp0/864      | NA                      | R01_cb18135_c1/flp0/864      | R01_cb18135_c1/flp0/864  | R01_cb18135_c1/flp0/864   |
| R01_cb8564_c110854/flp0/3149 | NA                      | R01_cb8564_c110854/flp0/3149 | NA                       | NA                        |
| R01_cb13981_c1/flp0/905      | NA                      | R01_cb13981_c1/flp0/905      | NA                       | NA                        |
| R01_cb3787_c2/flp0/3093      | NA                      | R01_cb3787_c2/flp0/3093      | NA                       | NA                        |
| R01_cb8449_c4/flp1/2010      | NA                      | NA                           | NA                       | R01_cb8449_c4/flp1/2010   |
| R01_cb10611_c1/f2p0/1452     | NA                      | NA                           | NA                       | R01_cb10611_c1/f2p0/1452  |
| R01_cb9998_c1/flp0/3512      | NA                      | R01_cb9998_c1/flp0/3512      | NA                       | NA                        |
| R01_cb8564_c71575/flp1/3050  | NA                      | R01_cb8564_c71575/flp1/3050  | NA                       | NA                        |
| R01_cb10530_c1/flp0/2633     | NA                      | NA                           | NA                       | R01_cb10530_c1/flp0/2633  |
| R01_cb8227_c10/flp0/2310     | NA                      | R01_cb8227_c10/flp0/2310     | NA                       | NA                        |
| R01_cb2738_c0/f2p0/2124      | NA                      | NA                           | NA                       | R01_cb2738_c0/f2p0/2124   |
| R01_cb1739_c11/flp0/483      | R01_cb1739_c11/flp0/483 | NA                           | NA                       | R01_cb1739_c11/flp0/483   |
| R01_cb7114_c8/flp0/3569      | NA                      | NA                           | NA                       | R01_cb7114_c8/flp0/3569   |
| R01_cb15676_c0/flp0/1601     | NA                      | NA                           | NA                       | R01_cb15676_c0/flp0/1601  |
| R01_cb12444_c49/flp0/1060    | NA                      | R01_cb12444_c49/flp0/1060    | NA                       | NA                        |
| R01_cb10344_c4/flp1/1136     | NA                      | NA                           | NA                       | R01_cb10344_c4/flp1/1136  |
| R01_cb5482_c10/flp0/3244     | NA                      | R01_cb5482_c10/flp0/3244     | R01_cb5482_c10/flp0/3244 | NA                        |
| R01_cb12617_c4/flp0/620      | NA                      | R01_cb12617_c4/flp0/620      | NA                       | R01_cb12617_c4/flp0/620   |



|                              |                          |                              |                              |                              |
|------------------------------|--------------------------|------------------------------|------------------------------|------------------------------|
| R01_cb12321_c181/f6p0/671    | NA                       | R01_cb12321_c181/f6p0/671    | NA                           | NA                           |
| R01_cb7736_c8/f1p0/3317      | NA                       | R01_cb7736_c8/f1p0/3317      | NA                           | NA                           |
| R01_cb12645_c0/f1p0/1679     | NA                       | R01_cb12645_c0/f1p0/1679     | NA                           | R01_cb12645_c0/f1p0/1679     |
| R01_cb8564_c119694/f4p0/2330 | NA                       | NA                           | NA                           | R01_cb8564_c119694/f4p0/2330 |
| R01_cb7362_c3/f3p1/2642      | R01_cb7362_c3/f3p1/2642  | R01_cb7362_c3/f3p1/2642      | NA                           | NA                           |
| R01_cb7845_c1/f1p0/2303      | NA                       | R01_cb7845_c1/f1p0/2303      | NA                           | NA                           |
| R01_cb16960_c0/f2p0/657      | NA                       | R01_cb16960_c0/f2p0/657      | NA                           | R01_cb16960_c0/f2p0/657      |
| R01_cb18409_c10/f5p0/916     | NA                       | NA                           | NA                           | R01_cb18409_c10/f5p0/916     |
| R01_cb8564_c41242/f1p0/3140  | NA                       | NA                           | NA                           | R01_cb8564_c41242/f1p0/3140  |
| R01_cb363_c4/f1p0/2373       | NA                       | NA                           | NA                           | R01_cb363_c4/f1p0/2373       |
| R01_cb10228_c8/f37p2/746     | NA                       | R01_cb10228_c8/f37p2/746     | R01_cb10228_c8/f37p2/746     | R01_cb10228_c8/f37p2/746     |
| R01_cb15811_c39/f1p0/972     | NA                       | R01_cb15811_c39/f1p0/972     | R01_cb15811_c39/f1p0/972     | R01_cb15811_c39/f1p0/972     |
| R01_cb9305_c12/f1p1/1823     | NA                       | NA                           | NA                           | R01_cb9305_c12/f1p1/1823     |
| R01_cb2715_c4/f1p0/811       | NA                       | R01_cb2715_c4/f1p0/811       | NA                           | NA                           |
| R01_cb14646_c0/f4p0/717      | R01_cb14646_c0/f4p0/717  | NA                           | NA                           | NA                           |
| R01_cb3281_c14/f1p0/2440     | NA                       | R01_cb3281_c14/f1p0/2440     | NA                           | NA                           |
| R01_cb15379_c0/f1p0/1725     | NA                       | R01_cb15379_c0/f1p0/1725     | R01_cb15379_c0/f1p0/1725     | R01_cb15379_c0/f1p0/1725     |
| R01_cb13980_c0/f1p0/1631     | NA                       | NA                           | NA                           | R01_cb13980_c0/f1p0/1631     |
| R01_cb15998_c8/f1p0/1636     | NA                       | NA                           | NA                           | R01_cb15998_c8/f1p0/1636     |
| R01_cb17824_c0/f1p0/1802     | R01_cb17824_c0/f1p0/1802 | R01_cb17824_c0/f1p0/1802     | R01_cb17824_c0/f1p0/1802     | R01_cb17824_c0/f1p0/1802     |
| R01_cb8564_c129254/f1p0/2303 | NA                       | R01_cb8564_c129254/f1p0/2303 | R01_cb8564_c129254/f1p0/2303 | R01_cb8564_c129254/f1p0/2303 |
| R01_cb13545_c17/f1p0/737     | NA                       | R01_cb13545_c17/f1p0/737     | R01_cb13545_c17/f1p0/737     | NA                           |
| R01_cb3601_c22/f1p0/1018     | NA                       | R01_cb3601_c22/f1p0/1018     | NA                           | NA                           |
| R01_cb8564_c77640/f1p0/2583  | NA                       | R01_cb8564_c77640/f1p0/2583  | R01_cb8564_c77640/f1p0/2583  | R01_cb8564_c77640/f1p0/2583  |

|                              |                          |                             |                            |                              |
|------------------------------|--------------------------|-----------------------------|----------------------------|------------------------------|
| R01_cb3539_c4/flp0/3571      | NA                       | R01_cb3539_c4/flp0/3571     | NA                         | NA                           |
| R01_cb8564_c152349/flp3/3967 | NA                       | NA                          | NA                         | R01_cb8564_c152349/flp3/3967 |
| R01_cb5983_c5/flp1/1039      | NA                       | NA                          | NA                         | R01_cb5983_c5/flp1/1039      |
| R01_cb12512_c4/flp2/1452     | NA                       | R01_cb12512_c4/flp2/1452    | R01_cb12512_c4/flp2/1452   | R01_cb12512_c4/flp2/1452     |
| R01_cb15901_c0/f2p0/1670     | NA                       | R01_cb15901_c0/f2p0/1670    | NA                         | NA                           |
| R01_cb3586_c14/flp0/2399     | NA                       | NA                          | NA                         | R01_cb3586_c14/flp0/2399     |
| R01_cb15346_c6/flp0/618      | NA                       | NA                          | R01_cb15346_c6/flp0/618    | R01_cb15346_c6/flp0/618      |
| R01_cb18358_c1/flp0/1464     | R01_cb18358_c1/flp0/1464 | R01_cb18358_c1/flp0/1464    | R01_cb18358_c1/flp0/1464   | R01_cb18358_c1/flp0/1464     |
| R01_cb18005_c2/flp0/619      | NA                       | NA                          | R01_cb18005_c2/flp0/619    | NA                           |
| R01_cb3963_c2/flp0/2208      | NA                       | R01_cb3963_c2/flp0/2208     | NA                         | NA                           |
| R01_cb8564_c22650/flp0/3988  | NA                       | R01_cb8564_c22650/flp0/3988 | NA                         | NA                           |
| R01_cb11434_c0/f2p0/1777     | NA                       | NA                          | R01_cb11434_c0/f2p0/1777   | R01_cb11434_c0/f2p0/1777     |
| R01_cb8285_c2/flp0/1948      | NA                       | NA                          | NA                         | R01_cb8285_c2/flp0/1948      |
| R01_cb10740_c2/flp0/2758     | NA                       | R01_cb10740_c2/flp0/2758    | NA                         | NA                           |
| R01_cb8937_c0/flp0/2230      | NA                       | NA                          | NA                         | R01_cb8937_c0/flp0/2230      |
| R01_cb16153_c5/flp0/692      | NA                       | NA                          | R01_cb16153_c5/flp0/692    | R01_cb16153_c5/flp0/692      |
| R01_cb8564_c4734/flp0/2654   | NA                       | NA                          | R01_cb8564_c4734/flp0/2654 | R01_cb8564_c4734/flp0/2654   |
| R01_cb13488_c8/flp1/915      | NA                       | NA                          | NA                         | R01_cb13488_c8/flp1/915      |
| R01_cb12148_c14/flp0/667     | NA                       | R01_cb12148_c14/flp0/667    | NA                         | R01_cb12148_c14/flp0/667     |
| R01_cb14228_c9/flp0/606      | NA                       | NA                          | NA                         | R01_cb14228_c9/flp0/606      |
| R01_cb12515_c8/flp1/1782     | NA                       | R01_cb12515_c8/flp1/1782    | NA                         | NA                           |
| R01_cb11123_c2/flp0/689      | NA                       | R01_cb11123_c2/flp0/689     | NA                         | R01_cb11123_c2/flp0/689      |
| R01_cb18476_c0/flp0/814      | NA                       | NA                          | NA                         | R01_cb18476_c0/flp0/814      |
| R01_cb6534_c0/f2p0/701       | NA                       | NA                          | NA                         | R01_cb6534_c0/f2p0/701       |
| R01_cb18224_c1/flp0/1554     | NA                       | NA                          | NA                         | R01_cb18224_c1/flp0/1554     |

|                                  |                                   |                                  |                                  |                                  |
|----------------------------------|-----------------------------------|----------------------------------|----------------------------------|----------------------------------|
| R01_cb18456_c7632/f1p0/550       | NA                                | NA                               | NA                               | R01_cb18456_c7632/f1p0/550       |
| R01_cb18853_c1/f1p0/5106         | NA                                | R01_cb18853_c1/f1p0/5106         | NA                               | R01_cb18853_c1/f1p0/5106         |
| R01_cb6059_c2/f1p1/2947          | NA                                | NA                               | NA                               | R01_cb6059_c2/f1p1/2947          |
| R01_cb1594_c10/f1p0/2394         | NA                                | NA                               | NA                               | R01_cb1594_c10/f1p0/2394         |
| R01_cb8564_c111266/f1p0/356<br>1 | NA                                | NA                               | NA                               | R01_cb8564_c111266/f1p0/356<br>1 |
| R01_cb2104_c13/f1p0/1024         | NA                                | NA                               | R01_cb2104_c13/f1p0/1024         | R01_cb2104_c13/f1p0/1024         |
| R01_cb8564_c116757/f8p2/211<br>9 | NA                                | NA                               | NA                               | R01_cb8564_c116757/f8p2/211<br>9 |
| R01_cb9359_c3/f1p0/1679          | NA                                | NA                               | NA                               | R01_cb9359_c3/f1p0/1679          |
| R01_cb16930_c1/f1p0/785          | R01_cb16930_c1/f1p0/785           | R01_cb16930_c1/f1p0/785          | R01_cb16930_c1/f1p0/785          | R01_cb16930_c1/f1p0/785          |
| R01_cb8335_c0/f4p1/2388          | NA                                | NA                               | NA                               | R01_cb8335_c0/f4p1/2388          |
| R01_cb3848_c8/f1p1/3035          | NA                                | NA                               | NA                               | R01_cb3848_c8/f1p1/3035          |
| R01_cb8564_c114092/f1p0/322<br>2 | R01_cb8564_c114092/f1p0/322<br>22 | R01_cb8564_c114092/f1p0/322<br>2 | R01_cb8564_c114092/f1p0/322<br>2 | R01_cb8564_c114092/f1p0/322<br>2 |
| R01_cb16782_c2/f1p0/636          | R01_cb16782_c2/f1p0/636           | R01_cb16782_c2/f1p0/636          | R01_cb16782_c2/f1p0/636          | R01_cb16782_c2/f1p0/636          |
| R01_cb18694_c0/f1p0/5743         | R01_cb18694_c0/f1p0/5743          | R01_cb18694_c0/f1p0/5743         | NA                               | NA                               |
| R01_cb8564_c45133/f1p0/1926<br>6 | R01_cb8564_c45133/f1p0/1926<br>6  | R01_cb8564_c45133/f1p0/1926      | R01_cb8564_c45133/f1p0/1926      | R01_cb8564_c45133/f1p0/1926      |
| R01_cb110_c33/f1p0/6698          | NA                                | NA                               | NA                               | R01_cb110_c33/f1p0/6698          |
| R01_cb4656_c5/f1p0/2544          | NA                                | R01_cb4656_c5/f1p0/2544          | NA                               | NA                               |
| R01_cb15173_c0/f1p0/1153         | NA                                | NA                               | NA                               | R01_cb15173_c0/f1p0/1153         |
| R01_cb8324_c12/f1p0/1325         | NA                                | NA                               | NA                               | R01_cb8324_c12/f1p0/1325         |
| R01_cb9529_c4/f1p0/949           | NA                                | NA                               | NA                               | R01_cb9529_c4/f1p0/949           |
| R01_cb3797_c12/f1p1/6141         | NA                                | NA                               | NA                               | R01_cb3797_c12/f1p1/6141         |
| R01_cb17756_c26/f1p0/1649        | R01_cb17756_c26/f1p0/1649         | R01_cb17756_c26/f1p0/1649        | R01_cb17756_c26/f1p0/1649        | R01_cb17756_c26/f1p0/1649        |

|                              |                              |                              |                              |                              |
|------------------------------|------------------------------|------------------------------|------------------------------|------------------------------|
| R01_cb13586_c4/flp0/1157     | NA                           | R01_cb13586_c4/flp0/1157     | NA                           | NA                           |
| R01_cb8564_c129816/flp0/2078 | R01_cb8564_c129816/flp0/2078 | R01_cb8564_c129816/flp0/2078 | R01_cb8564_c129816/flp0/2078 | R01_cb8564_c129816/flp0/2078 |
| R01_cb9760_c0/flp0/1985      | NA                           | R01_cb9760_c0/flp0/1985      | R01_cb9760_c0/flp0/1985      | R01_cb9760_c0/flp0/1985      |
| R01_cb8564_c381/f4p3/1955    | NA                           | NA                           | NA                           | R01_cb8564_c381/f4p3/1955    |
| R01_cb18456_c1689/f2p0/482   | R01_cb18456_c1689/f2p0/482   | R01_cb18456_c1689/f2p0/482   | R01_cb18456_c1689/f2p0/482   | R01_cb18456_c1689/f2p0/482   |
| R01_cb10010_c0/flp0/1371     | NA                           | R01_cb10010_c0/flp0/1371     | NA                           | R01_cb10010_c0/flp0/1371     |
| R01_cb12023_c8/flp0/786      | NA                           | NA                           | NA                           | R01_cb12023_c8/flp0/786      |
| R01_cb15878_c8/flp0/611      | NA                           | R01_cb15878_c8/flp0/611      | NA                           | NA                           |
| R01_cb4146_c6/flp0/2808      | NA                           | R01_cb4146_c6/flp0/2808      | NA                           | NA                           |
| R01_cb6294_c2/flp0/2891      | NA                           | R01_cb6294_c2/flp0/2891      | NA                           | NA                           |
| R01_cb8564_c14728/flp0/2835  | NA                           | R01_cb8564_c14728/flp0/2835  | NA                           | NA                           |
| R01_cb10386_c3/flp2/1775     | R01_cb10386_c3/flp2/1775     | R01_cb10386_c3/flp2/1775     | NA                           | R01_cb10386_c3/flp2/1775     |
| R01_cb10241_c3/flp1/2051     | NA                           | R01_cb10241_c3/flp1/2051     | R01_cb10241_c3/flp1/2051     | NA                           |
| R01_cb1124_c15/flp0/1216     | NA                           | NA                           | NA                           | R01_cb1124_c15/flp0/1216     |
| R01_cb12824_c1/f6p0/674      | NA                           | NA                           | R01_cb12824_c1/f6p0/674      | R01_cb12824_c1/f6p0/674      |
| R01_cb12912_c2/flp0/1874     | NA                           | R01_cb12912_c2/flp0/1874     | NA                           | R01_cb12912_c2/flp0/1874     |
| R01_cb11674_c1/flp0/2815     | NA                           | R01_cb11674_c1/flp0/2815     | R01_cb11674_c1/flp0/2815     | R01_cb11674_c1/flp0/2815     |
| R01_cb8564_c82192/flp0/2137  | NA                           | R01_cb8564_c82192/flp0/2137  | NA                           | NA                           |
| R01_cb18456_c4846/flp1/1274  | NA                           | R01_cb18456_c4846/flp1/1274  | NA                           | NA                           |
| R01_cb11972_c4/flp0/1207     | NA                           | NA                           | NA                           | R01_cb11972_c4/flp0/1207     |
| R01_cb1438_c8/flp0/4349      | NA                           | NA                           | NA                           | R01_cb1438_c8/flp0/4349      |
| R01_cb8564_c3875/flp0/2853   | R01_cb8564_c3875/flp0/2853   | R01_cb8564_c3875/flp0/2853   | R01_cb8564_c3875/flp0/2853   | R01_cb8564_c3875/flp0/2853   |
| R01_cb3550_c0/f5p0/2847      | NA                           | NA                           | NA                           | R01_cb3550_c0/f5p0/2847      |
| R01_cb11372_c1/flp0/3352     | NA                           | R01_cb11372_c1/flp0/3352     | NA                           | NA                           |
| R01_cb14805_c5/flp0/619      | R01_cb14805_c5/flp0/619      | R01_cb14805_c5/flp0/619      | NA                           | NA                           |

|                             |                             |                             |                             |                             |
|-----------------------------|-----------------------------|-----------------------------|-----------------------------|-----------------------------|
| R01_cb9511_c2/flp0/2059     | NA                          | R01_cb9511_c2/flp0/2059     | NA                          | NA                          |
| R01_cb16646_c3/flp0/1856    | NA                          | NA                          | NA                          | R01_cb16646_c3/flp0/1856    |
| R01_cb8546_c2/f2p0/1759     | NA                          | NA                          | NA                          | R01_cb8546_c2/f2p0/1759     |
| R01_cb10628_c0/flp0/793     | NA                          | R01_cb10628_c0/flp0/793     | NA                          | R01_cb10628_c0/flp0/793     |
| R01_cb10226_c1/flp0/2354    | R01_cb10226_c1/flp0/2354    | R01_cb10226_c1/flp0/2354    | R01_cb10226_c1/flp0/2354    | R01_cb10226_c1/flp0/2354    |
| R01_cb8564_c44301/flp0/3723 | NA                          | NA                          | R01_cb8564_c44301/flp0/3723 | R01_cb8564_c44301/flp0/3723 |
| R01_cb15552_c2/flp0/845     | NA                          | R01_cb15552_c2/flp0/845     | NA                          | R01_cb15552_c2/flp0/845     |
| R01_cb16416_c2/flp0/1199    | NA                          | NA                          | NA                          | R01_cb16416_c2/flp0/1199    |
| R01_cb6162_c2/flp0/1338     | R01_cb6162_c2/flp0/1338     | R01_cb6162_c2/flp0/1338     | R01_cb6162_c2/flp0/1338     | R01_cb6162_c2/flp0/1338     |
| R01_cb4836_c6/flp0/5743     | NA                          | R01_cb4836_c6/flp0/5743     | NA                          | R01_cb4836_c6/flp0/5743     |
| R01_cb8564_c12935/flp0/2562 | NA                          | R01_cb8564_c12935/flp0/2562 | R01_cb8564_c12935/flp0/2562 | R01_cb8564_c12935/flp0/2562 |
| R01_cb7828_c2/f2p0/2025     | NA                          | NA                          | NA                          | R01_cb7828_c2/f2p0/2025     |
| R01_cb280_c86/flp0/2559     | NA                          | R01_cb280_c86/flp0/2559     | NA                          | NA                          |
| R01_cb14472_c0/f20p1/755    | NA                          | NA                          | NA                          | R01_cb14472_c0/f20p1/755    |
| R01_cb11150_c3/flp0/628     | NA                          | R01_cb11150_c3/flp0/628     | NA                          | NA                          |
| R01_cb12847_c1/flp0/1438    | NA                          | NA                          | NA                          | R01_cb12847_c1/flp0/1438    |
| R01_cb7821_c0/flp0/2526     | R01_cb7821_c0/flp0/2526     | R01_cb7821_c0/flp0/2526     | R01_cb7821_c0/flp0/2526     | R01_cb7821_c0/flp0/2526     |
| R01_cb14526_c7/flp0/458     | NA                          | R01_cb14526_c7/flp0/458     | R01_cb14526_c7/flp0/458     | R01_cb14526_c7/flp0/458     |
| R01_cb14152_c2/flp0/775     | NA                          | NA                          | NA                          | R01_cb14152_c2/flp0/775     |
| R01_cb14085_c0/flp0/598     | NA                          | R01_cb14085_c0/flp0/598     | NA                          | NA                          |
| R01_cb11208_c1/f2p0/1334    | NA                          | NA                          | NA                          | R01_cb11208_c1/f2p0/1334    |
| R01_cb8564_c71667/flp0/3239 | R01_cb8564_c71667/flp0/3239 | R01_cb8564_c71667/flp0/3239 | NA                          | NA                          |
| R01_cb15912_c1/flp0/1764    | NA                          | NA                          | NA                          | R01_cb15912_c1/flp0/1764    |
| R01_cb16782_c0/flp0/407     | R01_cb16782_c0/flp0/407     | R01_cb16782_c0/flp0/407     | R01_cb16782_c0/flp0/407     | R01_cb16782_c0/flp0/407     |
| R01_cb8564_c1636/flp0/2152  | R01_cb8564_c1636/flp0/2152  | R01_cb8564_c1636/flp0/2152  | NA                          | NA                          |

|                             |                          |                             |                             |                             |
|-----------------------------|--------------------------|-----------------------------|-----------------------------|-----------------------------|
| R01_cb12839_c6/flp0/516     | NA                       | R01_cb12839_c6/flp0/516     | NA                          | NA                          |
| R01_cb12314_c2/flp1/624     | NA                       | NA                          | R01_cb12314_c2/flp1/624     | NA                          |
| R01_cb8564_c5185/flp6/1948  | NA                       | NA                          | NA                          | R01_cb8564_c5185/flp6/1948  |
| R01_cb7730_c18/flp0/2091    | NA                       | NA                          | NA                          | R01_cb7730_c18/flp0/2091    |
| R01_cb8564_c25428/flp0/2720 | NA                       | R01_cb8564_c25428/flp0/2720 | NA                          | NA                          |
| R01_cb6631_c14/flp0/2754    | NA                       | NA                          | NA                          | R01_cb6631_c14/flp0/2754    |
| R01_cb12054_c33/flp0/362    | R01_cb12054_c33/flp0/362 | R01_cb12054_c33/flp0/362    | R01_cb12054_c33/flp0/362    | R01_cb12054_c33/flp0/362    |
| R01_cb8564_c38921/flp0/2056 | NA                       | R01_cb8564_c38921/flp0/2056 | NA                          | NA                          |
| R01_cb14971_c0/f3p0/701     | R01_cb14971_c0/f3p0/701  | NA                          | NA                          | R01_cb14971_c0/f3p0/701     |
| R01_cb11150_c0/f2p0/823     | NA                       | R01_cb11150_c0/f2p0/823     | NA                          | NA                          |
| R01_cb10359_c3/flp0/1247    | NA                       | NA                          | NA                          | R01_cb10359_c3/flp0/1247    |
| R01_cb2177_c49/flp2/3375    | NA                       | R01_cb2177_c49/flp2/3375    | NA                          | NA                          |
| R01_cb18301_c15/flp0/972    | R01_cb18301_c15/flp0/972 | R01_cb18301_c15/flp0/972    | R01_cb18301_c15/flp0/972    | R01_cb18301_c15/flp0/972    |
| R01_cb6802_c24/flp0/4072    | NA                       | R01_cb6802_c24/flp0/4072    | NA                          | NA                          |
| R01_cb5756_c3/flp0/1507     | R01_cb5756_c3/flp0/1507  | R01_cb5756_c3/flp0/1507     | R01_cb5756_c3/flp0/1507     | R01_cb5756_c3/flp0/1507     |
| R01_cb18409_c48/flp0/401    | R01_cb18409_c48/flp0/401 | R01_cb18409_c48/flp0/401    | R01_cb18409_c48/flp0/401    | R01_cb18409_c48/flp0/401    |
| R01_cb15724_c5/flp0/1249    | R01_cb15724_c5/flp0/1249 | R01_cb15724_c5/flp0/1249    | R01_cb15724_c5/flp0/1249    | R01_cb15724_c5/flp0/1249    |
| R01_cb8564_c1046/flp0/4229  | NA                       | R01_cb8564_c1046/flp0/4229  | NA                          | NA                          |
| R01_cb1077_c23/flp1/2042    | NA                       | NA                          | NA                          | R01_cb1077_c23/flp1/2042    |
| R01_cb1887_c1/flp0/1966     | NA                       | NA                          | NA                          | R01_cb1887_c1/flp0/1966     |
| R01_cb11693_c1/flp0/1972    | NA                       | R01_cb11693_c1/flp0/1972    | NA                          | NA                          |
| R01_cb10493_c2/flp0/2221    | NA                       | NA                          | NA                          | R01_cb10493_c2/flp0/2221    |
| R01_cb10034_c34/flp4/1711   | NA                       | R01_cb10034_c34/flp4/1711   | NA                          | NA                          |
| R01_cb8564_c91234/flp0/4224 | NA                       | NA                          | NA                          | R01_cb8564_c91234/flp0/4224 |
| R01_cb4839_c4/flp0/3248     | NA                       | R01_cb4839_c4/flp0/3248     | NA                          | NA                          |
| R01_cb8564_c50439/flp0/2188 | NA                       | R01_cb8564_c50439/flp0/2188 | R01_cb8564_c50439/flp0/2188 | R01_cb8564_c50439/flp0/2188 |

|                             |                            |                             |                            |                             |
|-----------------------------|----------------------------|-----------------------------|----------------------------|-----------------------------|
| R01_cb8564_c9977/f2p1/2598  | NA                         | NA                          | NA                         | R01_cb8564_c9977/f2p1/2598  |
| R01_cb4074_c6/f1p0/3445     | NA                         | R01_cb4074_c6/f1p0/3445     | NA                         | NA                          |
| R01_cb8564_c3048/f1p0/2616  | NA                         | R01_cb8564_c3048/f1p0/2616  | R01_cb8564_c3048/f1p0/2616 | R01_cb8564_c3048/f1p0/2616  |
| R01_cb18423_c0/f1p0/497     | NA                         | NA                          | NA                         | R01_cb18423_c0/f1p0/497     |
| R01_cb16145_c0/f1p0/1000    | NA                         | R01_cb16145_c0/f1p0/1000    | R01_cb16145_c0/f1p0/1000   | NA                          |
| R01_cb7504_c9/f1p0/2486     | NA                         | R01_cb7504_c9/f1p0/2486     | NA                         | NA                          |
| R01_cb8564_c68423/f4p0/2640 | NA                         | NA                          | NA                         | R01_cb8564_c68423/f4p0/2640 |
| R01_cb14463_c4/f1p0/489     | NA                         | NA                          | NA                         | R01_cb14463_c4/f1p0/489     |
| R01_cb11183_c3/f1p0/2053    | NA                         | NA                          | NA                         | R01_cb11183_c3/f1p0/2053    |
| R01_cb15342_c2/f1p0/785     | NA                         | R01_cb15342_c2/f1p0/785     | NA                         | NA                          |
| R01_cb3760_c3/f3p1/2548     | NA                         | NA                          | NA                         | R01_cb3760_c3/f3p1/2548     |
| R01_cb8564_c1857/f1p0/2458  | NA                         | R01_cb8564_c1857/f1p0/2458  | R01_cb8564_c1857/f1p0/2458 | R01_cb8564_c1857/f1p0/2458  |
| R01_cb4315_c2/f1p0/786      | NA                         | R01_cb4315_c2/f1p0/786      | NA                         | R01_cb4315_c2/f1p0/786      |
| R01_cb8564_c75745/f1p1/2647 | NA                         | R01_cb8564_c75745/f1p1/2647 | NA                         | NA                          |
| R01_cb14696_c4/f1p0/378     | R01_cb14696_c4/f1p0/378    | R01_cb14696_c4/f1p0/378     | R01_cb14696_c4/f1p0/378    | R01_cb14696_c4/f1p0/378     |
| R01_cb15468_c8/f1p0/1883    | NA                         | R01_cb15468_c8/f1p0/1883    | NA                         | NA                          |
| R01_cb7584_c13/f1p2/1804    | NA                         | R01_cb7584_c13/f1p2/1804    | NA                         | NA                          |
| R01_cb8564_c4219/f1p0/2959  | R01_cb8564_c4219/f1p0/2959 | R01_cb8564_c4219/f1p0/2959  | R01_cb8564_c4219/f1p0/2959 | R01_cb8564_c4219/f1p0/2959  |
| R01_cb7276_c17/f1p0/533     | NA                         | R01_cb7276_c17/f1p0/533     | R01_cb7276_c17/f1p0/533    | R01_cb7276_c17/f1p0/533     |
| R01_cb8564_c81741/f1p0/2084 | NA                         | R01_cb8564_c81741/f1p0/2084 | NA                         | R01_cb8564_c81741/f1p0/2084 |
| R01_cb5565_c74/f1p0/1859    | NA                         | R01_cb5565_c74/f1p0/1859    | NA                         | NA                          |
| R01_cb4674_c89/f1p0/1671    | NA                         | NA                          | NA                         | R01_cb4674_c89/f1p0/1671    |
| R01_cb8564_c4899/f1p0/3376  | NA                         | R01_cb8564_c4899/f1p0/3376  | NA                         | R01_cb8564_c4899/f1p0/3376  |
| R01_cb8564_c10643/f1p0/3397 | NA                         | R01_cb8564_c10643/f1p0/3397 | NA                         | NA                          |
| R01_cb13638_c0/f5p0/1098    | NA                         | NA                          | NA                         | R01_cb13638_c0/f5p0/1098    |
| R01_cb18361_c0/f2p0/483     | NA                         | R01_cb18361_c0/f2p0/483     | R01_cb18361_c0/f2p0/483    | R01_cb18361_c0/f2p0/483     |

|                              |                             |                              |                              |                              |
|------------------------------|-----------------------------|------------------------------|------------------------------|------------------------------|
| R01_cb5725_c17/flp0/2282     | NA                          | R01_cb5725_c17/flp0/2282     | NA                           | R01_cb5725_c17/flp0/2282     |
| R01_cb18456_c7628/flp0/458   | R01_cb18456_c7628/flp0/458  | R01_cb18456_c7628/flp0/458   | R01_cb18456_c7628/flp0/458   | R01_cb18456_c7628/flp0/458   |
| R01_cb2571_c24/flp0/3923     | NA                          | NA                           | NA                           | R01_cb2571_c24/flp0/3923     |
| R01_cb10077_c2/f2p0/1145     | NA                          | R01_cb10077_c2/f2p0/1145     | NA                           | NA                           |
| R01_cb17110_c0/f2p0/822      | R01_cb17110_c0/f2p0/822     | R01_cb17110_c0/f2p0/822      | R01_cb17110_c0/f2p0/822      | R01_cb17110_c0/f2p0/822      |
| R01_cb7254_c11/flp0/1680     | NA                          | NA                           | NA                           | R01_cb7254_c11/flp0/1680     |
| R01_cb14682_c1/flp0/911      | NA                          | R01_cb14682_c1/flp0/911      | NA                           | NA                           |
| R01_cb1392_c5/flp0/2403      | NA                          | NA                           | NA                           | R01_cb1392_c5/flp0/2403      |
| R01_cb10713_c4/flp0/1797     | NA                          | R01_cb10713_c4/flp0/1797     | NA                           | R01_cb10713_c4/flp0/1797     |
| R01_cb18132_c18/flp0/1884    | NA                          | R01_cb18132_c18/flp0/1884    | NA                           | NA                           |
| R01_cb12495_c2/flp0/1842     | NA                          | R01_cb12495_c2/flp0/1842     | NA                           | NA                           |
| R01_cb14037_c4/flp0/680      | NA                          | NA                           | R01_cb14037_c4/flp0/680      | NA                           |
| R01_cb10017_c82/flp0/917     | NA                          | R01_cb10017_c82/flp0/917     | NA                           | NA                           |
| R01_cb1437_c3/flp0/4973      | NA                          | NA                           | NA                           | R01_cb1437_c3/flp0/4973      |
| R01_cb8564_c123882/flp0/2943 | NA                          | R01_cb8564_c123882/flp0/2943 | R01_cb8564_c123882/flp0/2943 | R01_cb8564_c123882/flp0/2943 |
| R01_cb2674_c29/flp0/2727     | NA                          | NA                           | NA                           | R01_cb2674_c29/flp0/2727     |
| R01_cb8564_c76712/flp0/2263  | R01_cb8564_c76712/flp0/2263 | R01_cb8564_c76712/flp0/2263  | R01_cb8564_c76712/flp0/2263  | NA                           |
| R01_cb6032_c18/flp0/2989     | NA                          | R01_cb6032_c18/flp0/2989     | R01_cb6032_c18/flp0/2989     | R01_cb6032_c18/flp0/2989     |
| R01_cb560_c16/flp0/1285      | NA                          | NA                           | NA                           | R01_cb560_c16/flp0/1285      |
| R01_cb15714_c4/flp0/604      | NA                          | R01_cb15714_c4/flp0/604      | NA                           | NA                           |
| R01_cb15418_c2/f3p1/836      | NA                          | NA                           | NA                           | R01_cb15418_c2/f3p1/836      |
| R01_cb2333_c0/flp0/3971      | R01_cb2333_c0/flp0/3971     | R01_cb2333_c0/flp0/3971      | R01_cb2333_c0/flp0/3971      | NA                           |
| R01_cb2701_c7/flp0/2595      | NA                          | NA                           | NA                           | R01_cb2701_c7/flp0/2595      |
| R01_cb13408_c0/f3p0/1179     | NA                          | NA                           | NA                           | R01_cb13408_c0/f3p0/1179     |



|                              |                            |                              |                             |                             |
|------------------------------|----------------------------|------------------------------|-----------------------------|-----------------------------|
| R01_cb8564_c83551/flp0/3123  | NA                         | R01_cb8564_c83551/flp0/3123  | NA                          | R01_cb8564_c83551/flp0/3123 |
| R01_cb8564_c38568/flp0/2321  | NA                         | NA                           | NA                          | R01_cb8564_c38568/flp0/2321 |
| R01_cb2177_c153/flp0/1742    | NA                         | R01_cb2177_c153/flp0/1742    | NA                          | NA                          |
| R01_cb14256_c2/flp0/1569     | NA                         | R01_cb14256_c2/flp0/1569     | NA                          | NA                          |
| R01_cb16120_c2/flp0/982      | NA                         | R01_cb16120_c2/flp0/982      | R01_cb16120_c2/flp0/982     | R01_cb16120_c2/flp0/982     |
| R01_cb9793_c5/flp0/1162      | NA                         | NA                           | R01_cb9793_c5/flp0/1162     | R01_cb9793_c5/flp0/1162     |
| R01_cb868_c27/flp0/3308      | NA                         | R01_cb868_c27/flp0/3308      | NA                          | NA                          |
| R01_cb17805_c1/flp0/522      | NA                         | R01_cb17805_c1/flp0/522      | NA                          | R01_cb17805_c1/flp0/522     |
| R01_cb10717_c5/flp0/1797     | NA                         | R01_cb10717_c5/flp0/1797     | NA                          | NA                          |
| R01_cb10432_c6/flp0/4529     | NA                         | R01_cb10432_c6/flp0/4529     | NA                          | NA                          |
| R01_cb6508_c16/flp1/2368     | NA                         | R01_cb6508_c16/flp1/2368     | NA                          | NA                          |
| R01_cb6039_c56/flp1/3085     | NA                         | R01_cb6039_c56/flp1/3085     | R01_cb6039_c56/flp1/3085    | NA                          |
| R01_cb3381_c5/f2p0/2469      | NA                         | NA                           | NA                          | R01_cb3381_c5/f2p0/2469     |
| R01_cb3848_c28/f4p0/2408     | NA                         | NA                           | NA                          | R01_cb3848_c28/f4p0/2408    |
| R01_cb11718_c1/flp0/3893     | NA                         | NA                           | NA                          | R01_cb11718_c1/flp0/3893    |
| R01_cb8564_c23189/flp0/2373  | NA                         | R01_cb8564_c23189/flp0/2373  | R01_cb8564_c23189/flp0/2373 | R01_cb8564_c23189/flp0/2373 |
| R01_cb11706_c0/flp0/1158     | NA                         | R01_cb11706_c0/flp0/1158     | R01_cb11706_c0/flp0/1158    | R01_cb11706_c0/flp0/1158    |
| R01_cb8564_c123469/flp0/3334 | NA                         | R01_cb8564_c123469/flp0/3334 | NA                          | NA                          |
| R01_cb8831_c5/flp0/2282      | NA                         | NA                           | R01_cb8831_c5/flp0/2282     | R01_cb8831_c5/flp0/2282     |
| R01_cb8564_c74209/flp0/2540  | NA                         | R01_cb8564_c74209/flp0/2540  | NA                          | NA                          |
| R01_cb2854_c5/f2p0/3548      | NA                         | R01_cb2854_c5/f2p0/3548      | NA                          | NA                          |
| R01_cb18456_c5125/flp0/653   | R01_cb18456_c5125/flp0/653 | R01_cb18456_c5125/flp0/653   | R01_cb18456_c5125/flp0/653  | R01_cb18456_c5125/flp0/653  |
| R01_cb15959_c7/flp0/644      | NA                         | R01_cb15959_c7/flp0/644      | NA                          | R01_cb15959_c7/flp0/644     |
| R01_cb8560_c1/flp0/2563      | NA                         | NA                           | NA                          | R01_cb8560_c1/flp0/2563     |
| R01_cb4734_c0/flp0/3205      | NA                         | R01_cb4734_c0/flp0/3205      | R01_cb4734_c0/flp0/3205     | R01_cb4734_c0/flp0/3205     |

|                             |                             |                             |                             |                             |
|-----------------------------|-----------------------------|-----------------------------|-----------------------------|-----------------------------|
| R01_cb9797_c51/f2p0/2505    | NA                          | NA                          | NA                          | R01_cb9797_c51/f2p0/2505    |
| R01_cb18456_c6672/f1p0/620  | NA                          | R01_cb18456_c6672/f1p0/620  | R01_cb18456_c6672/f1p0/620  | R01_cb18456_c6672/f1p0/620  |
| R01_cb2581_c0/f2p0/1099     | NA                          | R01_cb2581_c0/f2p0/1099     | R01_cb2581_c0/f2p0/1099     | R01_cb2581_c0/f2p0/1099     |
| R01_cb17118_c4/f1p0/1886    | NA                          | R01_cb17118_c4/f1p0/1886    | R01_cb17118_c4/f1p0/1886    | R01_cb17118_c4/f1p0/1886    |
| R01_cb18456_c3340/f1p1/984  | NA                          | R01_cb18456_c3340/f1p1/984  | NA                          | NA                          |
| R01_cb12967_c7/f1p0/975     | NA                          | R01_cb12967_c7/f1p0/975     | NA                          | NA                          |
| R01_cb8564_c85965/f1p0/2336 | R01_cb8564_c85965/f1p0/2336 | R01_cb8564_c85965/f1p0/2336 | R01_cb8564_c85965/f1p0/2336 | R01_cb8564_c85965/f1p0/2336 |
| R01_cb1301_c3/f1p0/2903     | NA                          | NA                          | NA                          | R01_cb1301_c3/f1p0/2903     |
| R01_cb584_c20/f1p0/4710     | NA                          | R01_cb584_c20/f1p0/4710     | NA                          | NA                          |
| R01_cb16332_c1/f1p0/1369    | NA                          | R01_cb16332_c1/f1p0/1369    | R01_cb16332_c1/f1p0/1369    | R01_cb16332_c1/f1p0/1369    |
| R01_cb10074_c19/f3p2/555    | R01_cb10074_c19/f3p2/555    | R01_cb10074_c19/f3p2/555    | R01_cb10074_c19/f3p2/555    | R01_cb10074_c19/f3p2/555    |
| R01_cb8564_c78250/f1p0/1901 | R01_cb8564_c78250/f1p0/1901 | R01_cb8564_c78250/f1p0/1901 | R01_cb8564_c78250/f1p0/1901 | R01_cb8564_c78250/f1p0/1901 |
| R01_cb16038_c4/f1p1/477     | NA                          | R01_cb16038_c4/f1p1/477     | R01_cb16038_c4/f1p1/477     | R01_cb16038_c4/f1p1/477     |
| R01_cb11589_c0/f1p0/1162    | NA                          | R01_cb11589_c0/f1p0/1162    | NA                          | NA                          |
| R01_cb9850_c4/f1p0/756      | NA                          | R01_cb9850_c4/f1p0/756      | NA                          | NA                          |
| R01_cb5042_c9/f1p0/983      | NA                          | NA                          | R01_cb5042_c9/f1p0/983      | NA                          |
| R01_cb1488_c3/f1p0/3463     | NA                          | R01_cb1488_c3/f1p0/3463     | NA                          | NA                          |
| R01_cb6954_c3/f1p0/497      | R01_cb6954_c3/f1p0/497      | R01_cb6954_c3/f1p0/497      | R01_cb6954_c3/f1p0/497      | R01_cb6954_c3/f1p0/497      |
| R01_cb18343_c0/f1p0/1791    | NA                          | R01_cb18343_c0/f1p0/1791    | NA                          | NA                          |
| R01_cb8564_c83657/f1p0/2627 | NA                          | R01_cb8564_c83657/f1p0/2627 | NA                          | NA                          |
| R01_cb15425_c0/f3p0/1033    | NA                          | R01_cb15425_c0/f3p0/1033    | NA                          | NA                          |
| R01_cb18456_c7086/f1p0/1800 | NA                          | R01_cb18456_c7086/f1p0/1800 | NA                          | NA                          |
| R01_cb8564_c3053/f2p2/4010  | NA                          | R01_cb8564_c3053/f2p2/4010  | R01_cb8564_c3053/f2p2/4010  | R01_cb8564_c3053/f2p2/4010  |
| R01_cb12680_c15/f1p0/1755   | R01_cb12680_c15/f1p0/1755   | R01_cb12680_c15/f1p0/1755   | NA                          | NA                          |

|                              |                             |                              |                             |                             |
|------------------------------|-----------------------------|------------------------------|-----------------------------|-----------------------------|
| R01_cb18211_c1/flp0/461      | NA                          | R01_cb18211_c1/flp0/461      | NA                          | R01_cb18211_c1/flp0/461     |
| R01_cb8564_c83948/flp0/3284  | NA                          | R01_cb8564_c83948/flp0/3284  | R01_cb8564_c83948/flp0/3284 | R01_cb8564_c83948/flp0/3284 |
| R01_cb392_c13/flp0/1064      | R01_cb392_c13/flp0/1064     | R01_cb392_c13/flp0/1064      | NA                          | R01_cb392_c13/flp0/1064     |
| R01_cb124_c52/flp0/2890      | NA                          | NA                           | NA                          | R01_cb124_c52/flp0/2890     |
| R01_cb9088_c1/flp0/2195      | NA                          | NA                           | NA                          | R01_cb9088_c1/flp0/2195     |
| R01_cb938_c50/flp0/700       | R01_cb938_c50/flp0/700      | R01_cb938_c50/flp0/700       | NA                          | R01_cb938_c50/flp0/700      |
| R01_cb8564_c80143/f2p0/4971  | NA                          | R01_cb8564_c80143/f2p0/4971  | R01_cb8564_c80143/f2p0/4971 | R01_cb8564_c80143/f2p0/4971 |
| R01_cb4503_c10/flp0/3330     | NA                          | R01_cb4503_c10/flp0/3330     | NA                          | R01_cb4503_c10/flp0/3330    |
| R01_cb8564_c20519/flp0/3425  | R01_cb8564_c20519/flp0/3425 | R01_cb8564_c20519/flp0/3425  | R01_cb8564_c20519/flp0/3425 | R01_cb8564_c20519/flp0/3425 |
| R01_cb18714_c1/flp0/1400     | NA                          | NA                           | NA                          | R01_cb18714_c1/flp0/1400    |
| R01_cb7368_c3/flp0/1498      | NA                          | R01_cb7368_c3/flp0/1498      | NA                          | R01_cb7368_c3/flp0/1498     |
| R01_cb8084_c2/f3p1/2279      | NA                          | NA                           | NA                          | R01_cb8084_c2/f3p1/2279     |
| R01_cb12587_c4/flp0/1767     | NA                          | NA                           | NA                          | R01_cb12587_c4/flp0/1767    |
| R01_cb10228_c3/flp0/1532     | NA                          | NA                           | R01_cb10228_c3/flp0/1532    | NA                          |
| R01_cb1998_c1/flp0/2460      | NA                          | R01_cb1998_c1/flp0/2460      | R01_cb1998_c1/flp0/2460     | R01_cb1998_c1/flp0/2460     |
| R01_cb14694_c2/flp0/1209     | NA                          | NA                           | NA                          | R01_cb14694_c2/flp0/1209    |
| R01_cb10830_c1/flp0/2271     | NA                          | NA                           | NA                          | R01_cb10830_c1/flp0/2271    |
| R01_cb4458_c1/flp0/2901      | NA                          | NA                           | NA                          | R01_cb4458_c1/flp0/2901     |
| R01_cb8253_c4/flp0/2419      | NA                          | R01_cb8253_c4/flp0/2419      | NA                          | R01_cb8253_c4/flp0/2419     |
| R01_cb8564_c117138/flp0/4110 | NA                          | R01_cb8564_c117138/flp0/4110 | NA                          | NA                          |
| R01_cb13445_c1/flp0/590      | NA                          | R01_cb13445_c1/flp0/590      | NA                          | NA                          |
| R01_cb2677_c32/flp0/3741     | NA                          | R01_cb2677_c32/flp0/3741     | NA                          | NA                          |
| R01_cb11205_c1/flp0/2021     | NA                          | R01_cb11205_c1/flp0/2021     | NA                          | NA                          |
| R01_cb8564_c91068/flp0/3080  | R01_cb8564_c91068/flp0/3080 | R01_cb8564_c91068/flp0/3080  | R01_cb8564_c91068/flp0/3080 | R01_cb8564_c91068/flp0/3080 |

|                              |                             |                              |                             |                              |
|------------------------------|-----------------------------|------------------------------|-----------------------------|------------------------------|
|                              | 0                           |                              |                             |                              |
| R01_cb18456_c7199/flp0/1869  | NA                          | R01_cb18456_c7199/flp0/1869  | NA                          | NA                           |
| R01_cb8564_c129149/flp0/2439 | NA                          | NA                           | NA                          | R01_cb8564_c129149/flp0/2439 |
| R01_cb18456_c7462/flp0/1282  | R01_cb18456_c7462/flp0/1282 | R01_cb18456_c7462/flp0/1282  | R01_cb18456_c7462/flp0/1282 | R01_cb18456_c7462/flp0/1282  |
| R01_cb18456_c3577/flp0/809   | NA                          | R01_cb18456_c3577/flp0/809   | NA                          | NA                           |
| R01_cb8335_c3/f2p0/2388      | NA                          | NA                           | NA                          | R01_cb8335_c3/f2p0/2388      |
| R01_cb16718_c2/flp0/334      | R01_cb16718_c2/flp0/334     | R01_cb16718_c2/flp0/334      | R01_cb16718_c2/flp0/334     | R01_cb16718_c2/flp0/334      |
| R01_cb8564_c52119/flp0/2979  | NA                          | NA                           | NA                          | R01_cb8564_c52119/flp0/2979  |
| R01_cb3132_c0/f2p0/1470      | R01_cb3132_c0/f2p0/1470     | R01_cb3132_c0/f2p0/1470      | NA                          | R01_cb3132_c0/f2p0/1470      |
| R01_cb8564_c121591/flp0/2169 | NA                          | R01_cb8564_c121591/flp0/2169 | NA                          | R01_cb8564_c121591/flp0/2169 |
| R01_cb16422_c2/flp0/1761     | NA                          | R01_cb16422_c2/flp0/1761     | R01_cb16422_c2/flp0/1761    | R01_cb16422_c2/flp0/1761     |
| R01_cb8900_c7/flp0/1920      | NA                          | NA                           | NA                          | R01_cb8900_c7/flp0/1920      |
| R01_cb8564_c10270/flp0/3438  | NA                          | R01_cb8564_c10270/flp0/3438  | NA                          | NA                           |
| R01_cb15949_c1/flp0/992      | NA                          | NA                           | NA                          | R01_cb15949_c1/flp0/992      |
| R01_cb15712_c3/flp0/6308     | NA                          | R01_cb15712_c3/flp0/6308     | NA                          | R01_cb15712_c3/flp0/6308     |
| R01_cb631_c14/flp0/2844      | NA                          | R01_cb631_c14/flp0/2844      | NA                          | NA                           |
| R01_cb402_c27/flp0/3012      | NA                          | NA                           | NA                          | R01_cb402_c27/flp0/3012      |
| R01_cb5246_c4/flp1/1828      | R01_cb5246_c4/flp1/1828     | R01_cb5246_c4/flp1/1828      | R01_cb5246_c4/flp1/1828     | R01_cb5246_c4/flp1/1828      |
| R01_cb13801_c2/flp0/620      | NA                          | R01_cb13801_c2/flp0/620      | NA                          | NA                           |
| R01_cb14472_c7/flp0/354      | R01_cb14472_c7/flp0/354     | R01_cb14472_c7/flp0/354      | NA                          | R01_cb14472_c7/flp0/354      |
| R01_cb4249_c3/flp0/3392      | NA                          | R01_cb4249_c3/flp0/3392      | R01_cb4249_c3/flp0/3392     | NA                           |
| R01_cb4378_c6/flp0/1725      | NA                          | NA                           | NA                          | R01_cb4378_c6/flp0/1725      |
| R01_cb2870_c14/flp0/2569     | NA                          | NA                           | NA                          | R01_cb2870_c14/flp0/2569     |

|                              |                              |                              |                              |                              |
|------------------------------|------------------------------|------------------------------|------------------------------|------------------------------|
| R01_cb4861_c0/flp0/3233      | NA                           | R01_cb4861_c0/flp0/3233      | NA                           | R01_cb4861_c0/flp0/3233      |
| R01_cb5622_c4/flp0/1701      | NA                           | NA                           | NA                           | R01_cb5622_c4/flp0/1701      |
| R01_cb8564_c53816/flp0/2916  | NA                           | R01_cb8564_c53816/flp0/2916  | NA                           | R01_cb8564_c53816/flp0/2916  |
| R01_cb10364_c7/flp0/1783     | NA                           | NA                           | NA                           | R01_cb10364_c7/flp0/1783     |
| R01_cb8564_c3998/flp0/2346   | NA                           | NA                           | R01_cb8564_c3998/flp0/2346   | R01_cb8564_c3998/flp0/2346   |
| R01_cb8564_c72169/flp0/3201  | NA                           | R01_cb8564_c72169/flp0/3201  | NA                           | NA                           |
| R01_cb1259_c26/flp2/3479     | NA                           | NA                           | NA                           | R01_cb1259_c26/flp2/3479     |
| R01_cb4941_c1/flp0/3363      | NA                           | NA                           | NA                           | R01_cb4941_c1/flp0/3363      |
| R01_cb8564_c11163/flp0/2029  | NA                           | NA                           | NA                           | R01_cb8564_c11163/flp0/2029  |
| R01_cb15308_c0/f4p0/759      | NA                           | NA                           | R01_cb15308_c0/f4p0/759      | R01_cb15308_c0/f4p0/759      |
| R01_cb10609_c2/flp0/731      | NA                           | R01_cb10609_c2/flp0/731      | NA                           | NA                           |
| R01_cb8564_c1358/flp0/2279   | NA                           | NA                           | NA                           | R01_cb8564_c1358/flp0/2279   |
| R01_cb8564_c123670/flp0/2039 | NA                           | R01_cb8564_c123670/flp0/2039 | R01_cb8564_c123670/flp0/2039 | R01_cb8564_c123670/flp0/2039 |
| R01_cb12931_c19/flp0/374     | R01_cb12931_c19/flp0/374     | R01_cb12931_c19/flp0/374     | R01_cb12931_c19/flp0/374     | R01_cb12931_c19/flp0/374     |
| R01_cb13776_c3/flp0/1861     | NA                           | NA                           | NA                           | R01_cb13776_c3/flp0/1861     |
| R01_cb14174_c4/flp0/1348     | NA                           | NA                           | NA                           | R01_cb14174_c4/flp0/1348     |
| R01_cb16499_c0/f7p1/1114     | NA                           | R01_cb16499_c0/f7p1/1114     | NA                           | NA                           |
| R01_cb17653_c2/flp0/1656     | NA                           | NA                           | NA                           | R01_cb17653_c2/flp0/1656     |
| R01_cb18456_c5010/flp0/1704  | NA                           | R01_cb18456_c5010/flp0/1704  | NA                           | NA                           |
| R01_cb5705_c2/flp4/2396      | NA                           | NA                           | R01_cb5705_c2/flp4/2396      | NA                           |
| R01_cb9535_c21/flp0/1132     | NA                           | R01_cb9535_c21/flp0/1132     | R01_cb9535_c21/flp0/1132     | R01_cb9535_c21/flp0/1132     |
| R01_cb8564_c117896/flp0/2328 | R01_cb8564_c117896/flp0/2328 | R01_cb8564_c117896/flp0/2328 | R01_cb8564_c117896/flp0/2328 | R01_cb8564_c117896/flp0/2328 |
| R01_cb12767_c14/fl1p1/933    | NA                           | NA                           | NA                           | R01_cb12767_c14/fl1p1/933    |
| R01_cb4532_c5/flp1/2905      | NA                           | R01_cb4532_c5/flp1/2905      | NA                           | NA                           |

|                              |                            |                              |                              |                              |
|------------------------------|----------------------------|------------------------------|------------------------------|------------------------------|
| R01_cb8232_c2/f1p0/1283      | R01_cb8232_c2/f1p0/1283    | R01_cb8232_c2/f1p0/1283      | R01_cb8232_c2/f1p0/1283      | NA                           |
| R01_cb17363_c3/f2p0/748      | NA                         | R01_cb17363_c3/f2p0/748      | R01_cb17363_c3/f2p0/748      | NA                           |
| R01_cb11815_c1/f1p0/3535     | NA                         | R01_cb11815_c1/f1p0/3535     | NA                           | NA                           |
| R01_cb8564_c17175/f1p0/2669  | NA                         | R01_cb8564_c17175/f1p0/2669  | R01_cb8564_c17175/f1p0/2669  | R01_cb8564_c17175/f1p0/2669  |
| R01_cb945_c10/f1p0/3512      | NA                         | R01_cb945_c10/f1p0/3512      | NA                           | NA                           |
| R01_cb10236_c8/f1p0/1225     | NA                         | R01_cb10236_c8/f1p0/1225     | NA                           | R01_cb10236_c8/f1p0/1225     |
| R01_cb8564_c36663/f1p0/2776  | NA                         | NA                           | NA                           | R01_cb8564_c36663/f1p0/2776  |
| R01_cb5156_c0/f69p3/807      | NA                         | NA                           | NA                           | R01_cb5156_c0/f69p3/807      |
| R01_cb14595_c6/f1p0/597      | R01_cb14595_c6/f1p0/597    | R01_cb14595_c6/f1p0/597      | R01_cb14595_c6/f1p0/597      | R01_cb14595_c6/f1p0/597      |
| R01_cb14564_c0/f6p0/818      | NA                         | R01_cb14564_c0/f6p0/818      | R01_cb14564_c0/f6p0/818      | NA                           |
| R01_cb1594_c4/f1p0/2740      | NA                         | NA                           | NA                           | R01_cb1594_c4/f1p0/2740      |
| R01_cb10688_c4/f1p0/1048     | NA                         | R01_cb10688_c4/f1p0/1048     | NA                           | R01_cb10688_c4/f1p0/1048     |
| R01_cb7506_c0/f1p0/2600      | NA                         | NA                           | NA                           | R01_cb7506_c0/f1p0/2600      |
| R01_cb8564_c126834/f1p1/2899 | NA                         | R01_cb8564_c126834/f1p1/2899 | R01_cb8564_c126834/f1p1/2899 | R01_cb8564_c126834/f1p1/2899 |
| R01_cb18456_c2306/f1p0/445   | NA                         | R01_cb18456_c2306/f1p0/445   | R01_cb18456_c2306/f1p0/445   | R01_cb18456_c2306/f1p0/445   |
| R01_cb18055_c1/f1p0/473      | NA                         | NA                           | NA                           | R01_cb18055_c1/f1p0/473      |
| R01_cb261_c54/f1p0/943       | R01_cb261_c54/f1p0/943     | R01_cb261_c54/f1p0/943       | R01_cb261_c54/f1p0/943       | R01_cb261_c54/f1p0/943       |
| R01_cb15590_c0/f1p0/709      | NA                         | R01_cb15590_c0/f1p0/709      | NA                           | NA                           |
| R01_cb1388_c21/f1p0/2483     | NA                         | R01_cb1388_c21/f1p0/2483     | R01_cb1388_c21/f1p0/2483     | R01_cb1388_c21/f1p0/2483     |
| R01_cb18456_c7584/f1p0/998   | R01_cb18456_c7584/f1p0/998 | R01_cb18456_c7584/f1p0/998   | R01_cb18456_c7584/f1p0/998   | R01_cb18456_c7584/f1p0/998   |
| R01_cb14332_c0/f2p0/1153     | R01_cb14332_c0/f2p0/1153   | R01_cb14332_c0/f2p0/1153     | NA                           | R01_cb14332_c0/f2p0/1153     |
| R01_cb5425_c10/f1p0/3099     | NA                         | R01_cb5425_c10/f1p0/3099     | NA                           | NA                           |
| R01_cb6179_c1/f1p0/2170      | NA                         | R01_cb6179_c1/f1p0/2170      | NA                           | NA                           |
| R01_cb8564_c4472/f1p0/2965   | NA                         | NA                           | R01_cb8564_c4472/f1p0/2965   | R01_cb8564_c4472/f1p0/2965   |
| R01_cb7219_c21/f2p1/2451     | NA                         | NA                           | NA                           | R01_cb7219_c21/f2p1/2451     |

|                              |                              |                              |                          |                              |
|------------------------------|------------------------------|------------------------------|--------------------------|------------------------------|
| R01_cb8564_c23809/flp0/2906  | NA                           | R01_cb8564_c23809/flp0/2906  | NA                       | NA                           |
| R01_cb7519_c12/flp1/1370     | NA                           | R01_cb7519_c12/flp1/1370     | NA                       | R01_cb7519_c12/flp1/1370     |
| R01_cb5847_c3/flp0/2997      | NA                           | R01_cb5847_c3/flp0/2997      | NA                       | R01_cb5847_c3/flp0/2997      |
| R01_cb14675_c9/flp0/726      | NA                           | R01_cb14675_c9/flp0/726      | R01_cb14675_c9/flp0/726  | R01_cb14675_c9/flp0/726      |
| R01_cb13026_c7/flp0/990      | R01_cb13026_c7/flp0/990      | R01_cb13026_c7/flp0/990      | NA                       | R01_cb13026_c7/flp0/990      |
| R01_cb6615_c8/flp0/4079      | NA                           | NA                           | NA                       | R01_cb6615_c8/flp0/4079      |
| R01_cb16425_c9/flp0/803      | R01_cb16425_c9/flp0/803      | R01_cb16425_c9/flp0/803      | R01_cb16425_c9/flp0/803  | R01_cb16425_c9/flp0/803      |
| R01_cb422_c7/flp1/6992       | NA                           | NA                           | NA                       | R01_cb422_c7/flp1/6992       |
| R01_cb17128_c2/flp0/1039     | NA                           | R01_cb17128_c2/flp0/1039     | NA                       | NA                           |
| R01_cb6356_c6/flp0/1021      | NA                           | R01_cb6356_c6/flp0/1021      | R01_cb6356_c6/flp0/1021  | R01_cb6356_c6/flp0/1021      |
| R01_cb16653_c1/flp0/1631     | NA                           | NA                           | NA                       | R01_cb16653_c1/flp0/1631     |
| R01_cb8564_c111997/flp0/2548 | R01_cb8564_c111997/flp0/2548 | R01_cb8564_c111997/flp0/2548 | NA                       | R01_cb8564_c111997/flp0/2548 |
| R01_cb3518_c14/flp2/1777     | NA                           | NA                           | NA                       | R01_cb3518_c14/flp2/1777     |
| R01_cb8564_c10300/flp0/2657  | NA                           | NA                           | NA                       | R01_cb8564_c10300/flp0/2657  |
| R01_cb1938_c12/flp1/2274     | NA                           | NA                           | NA                       | R01_cb1938_c12/flp1/2274     |
| R01_cb15462_c2/flp0/527      | NA                           | R01_cb15462_c2/flp0/527      | R01_cb15462_c2/flp0/527  | NA                           |
| R01_cb12242_c1/flp0/825      | NA                           | NA                           | NA                       | R01_cb12242_c1/flp0/825      |
| R01_cb5775_c9/flp0/1798      | NA                           | R01_cb5775_c9/flp0/1798      | NA                       | NA                           |
| R01_cb14752_c1/flp0/866      | NA                           | NA                           | NA                       | R01_cb14752_c1/flp0/866      |
| R01_cb17068_c0/flp0/1743     | NA                           | R01_cb17068_c0/flp0/1743     | R01_cb17068_c0/flp0/1743 | R01_cb17068_c0/flp0/1743     |
| R01_cb17216_c4/flp0/488      | NA                           | R01_cb17216_c4/flp0/488      | R01_cb17216_c4/flp0/488  | R01_cb17216_c4/flp0/488      |
| R01_cb18456_c3711/flp0/1750  | NA                           | R01_cb18456_c3711/flp0/1750  | NA                       | R01_cb18456_c3711/flp0/1750  |
| R01_cb16304_c2/flp0/1698     | NA                           | NA                           | NA                       | R01_cb16304_c2/flp0/1698     |
| R01_cb2082_c32/flp0/2897     | NA                           | NA                           | NA                       | R01_cb2082_c32/flp0/2897     |
| R01_cb5373_c5/flp0/2899      | NA                           | NA                           | NA                       | R01_cb5373_c5/flp0/2899      |

|                             |                             |                             |                             |                             |
|-----------------------------|-----------------------------|-----------------------------|-----------------------------|-----------------------------|
| R01_cb11358_c1/f1p0/2709    | NA                          | R01_cb11358_c1/f1p0/2709    | R01_cb11358_c1/f1p0/2709    | R01_cb11358_c1/f1p0/2709    |
| R01_cb11267_c0/f1p0/1468    | NA                          | R01_cb11267_c0/f1p0/1468    | NA                          | NA                          |
| R01_cb3954_c3/f1p0/395      | R01_cb3954_c3/f1p0/395      | R01_cb3954_c3/f1p0/395      | R01_cb3954_c3/f1p0/395      | R01_cb3954_c3/f1p0/395      |
| R01_cb17956_c4/f1p0/945     | NA                          | R01_cb17956_c4/f1p0/945     | NA                          | NA                          |
| R01_cb8564_c81089/f1p1/2976 | NA                          | R01_cb8564_c81089/f1p1/2976 | NA                          | NA                          |
| R01_cb14761_c1/f2p0/780     | NA                          | R01_cb14761_c1/f2p0/780     | R01_cb14761_c1/f2p0/780     | R01_cb14761_c1/f2p0/780     |
| R01_cb17145_c0/f2p0/1001    | NA                          | R01_cb17145_c0/f2p0/1001    | NA                          | NA                          |
| R01_cb4185_c5/f1p0/1429     | NA                          | R01_cb4185_c5/f1p0/1429     | NA                          | R01_cb4185_c5/f1p0/1429     |
| R01_cb18201_c0/f1p0/916     | NA                          | R01_cb18201_c0/f1p0/916     | R01_cb18201_c0/f1p0/916     | R01_cb18201_c0/f1p0/916     |
| R01_cb13433_c98/f1p0/975    | NA                          | NA                          | NA                          | R01_cb13433_c98/f1p0/975    |
| R01_cb11060_c1/f1p0/1246    | NA                          | R01_cb11060_c1/f1p0/1246    | NA                          | NA                          |
| R01_cb16642_c3/f1p0/1200    | NA                          | NA                          | R01_cb16642_c3/f1p0/1200    | R01_cb16642_c3/f1p0/1200    |
| R01_cb8031_c3/f1p0/1528     | NA                          | NA                          | R01_cb8031_c3/f1p0/1528     | R01_cb8031_c3/f1p0/1528     |
| R01_cb8564_c79060/f1p0/2839 | NA                          | R01_cb8564_c79060/f1p0/2839 | R01_cb8564_c79060/f1p0/2839 | R01_cb8564_c79060/f1p0/2839 |
| R01_cb1333_c38/f1p0/2096    | R01_cb1333_c38/f1p0/2096    | R01_cb1333_c38/f1p0/2096    | R01_cb1333_c38/f1p0/2096    | R01_cb1333_c38/f1p0/2096    |
| R01_cb10806_c0/f1p0/1055    | NA                          | R01_cb10806_c0/f1p0/1055    | NA                          | NA                          |
| R01_cb6181_c26/f1p0/2938    | NA                          | R01_cb6181_c26/f1p0/2938    | NA                          | NA                          |
| R01_cb8564_c20564/f1p0/3303 | R01_cb8564_c20564/f1p0/3303 | R01_cb8564_c20564/f1p0/3303 | NA                          | R01_cb8564_c20564/f1p0/3303 |
| R01_cb11844_c0/f1p0/1732    | R01_cb11844_c0/f1p0/1732    | R01_cb11844_c0/f1p0/1732    | R01_cb11844_c0/f1p0/1732    | R01_cb11844_c0/f1p0/1732    |
| R01_cb8564_c42299/f1p0/3200 | NA                          | R01_cb8564_c42299/f1p0/3200 | NA                          | NA                          |
| R01_cb18456_c7191/f1p0/429  | R01_cb18456_c7191/f1p0/429  | R01_cb18456_c7191/f1p0/429  | R01_cb18456_c7191/f1p0/429  | R01_cb18456_c7191/f1p0/429  |
| R01_cb5139_c25/f1p0/1029    | NA                          | R01_cb5139_c25/f1p0/1029    | R01_cb5139_c25/f1p0/1029    | R01_cb5139_c25/f1p0/1029    |
| R01_cb6508_c6/f1p0/2824     | NA                          | R01_cb6508_c6/f1p0/2824     | NA                          | NA                          |
| R01_cb8991_c2/f2p0/2016     | NA                          | NA                          | NA                          | R01_cb8991_c2/f2p0/2016     |
| R01_cb1967_c12/f1p0/3184    | R01_cb1967_c12/f1p0/3184    | R01_cb1967_c12/f1p0/3184    | R01_cb1967_c12/f1p0/3184    | R01_cb1967_c12/f1p0/3184    |



|                             |                             |                             |                            |                             |
|-----------------------------|-----------------------------|-----------------------------|----------------------------|-----------------------------|
| R01_cb16617_c0/f2p0/1486    | NA                          | NA                          | NA                         | R01_cb16617_c0/f2p0/1486    |
| R01_cb8564_c7779/f10p2/4939 | NA                          | NA                          | NA                         | R01_cb8564_c7779/f10p2/4939 |
| R01_cb13178_c1/f7p0/580     | NA                          | R01_cb13178_c1/f7p0/580     | NA                         | NA                          |
| R01_cb16979_c9/f1p0/694     | NA                          | R01_cb16979_c9/f1p0/694     | NA                         | NA                          |
| R01_cb13875_c7/f1p0/1471    | NA                          | NA                          | NA                         | R01_cb13875_c7/f1p0/1471    |
| R01_cb8139_c10/f1p0/3065    | NA                          | R01_cb8139_c10/f1p0/3065    | NA                         | NA                          |
| R01_cb6334_c3/f1p0/2879     | NA                          | R01_cb6334_c3/f1p0/2879     | NA                         | NA                          |
| R01_cb8107_c4/f1p0/622      | R01_cb8107_c4/f1p0/622      | R01_cb8107_c4/f1p0/622      | R01_cb8107_c4/f1p0/622     | R01_cb8107_c4/f1p0/622      |
| R01_cb10676_c5/f5p0/468     | NA                          | NA                          | NA                         | R01_cb10676_c5/f5p0/468     |
| R01_cb18447_c0/f2p0/1014    | NA                          | R01_cb18447_c0/f2p0/1014    | R01_cb18447_c0/f2p0/1014   | R01_cb18447_c0/f2p0/1014    |
| R01_cb4300_c2/f1p0/2636     | NA                          | R01_cb4300_c2/f1p0/2636     | NA                         | NA                          |
| R01_cb18456_c3722/f1p0/1251 | R01_cb18456_c3722/f1p0/1251 | R01_cb18456_c3722/f1p0/1251 | NA                         | R01_cb18456_c3722/f1p0/1251 |
| R01_cb2536_c31/f2p0/2648    | R01_cb2536_c31/f2p0/2648    | R01_cb2536_c31/f2p0/2648    | NA                         | NA                          |
| R01_cb18720_c1/f1p1/2800    | R01_cb18720_c1/f1p1/2800    | R01_cb18720_c1/f1p1/2800    | R01_cb18720_c1/f1p1/2800   | NA                          |
| R01_cb18485_c0/f1p0/570     | R01_cb18485_c0/f1p0/570     | R01_cb18485_c0/f1p0/570     | R01_cb18485_c0/f1p0/570    | R01_cb18485_c0/f1p0/570     |
| R01_cb14005_c4/f1p0/773     | R01_cb14005_c4/f1p0/773     | R01_cb14005_c4/f1p0/773     | R01_cb14005_c4/f1p0/773    | R01_cb14005_c4/f1p0/773     |
| R01_cb4722_c3/f1p0/852      | NA                          | R01_cb4722_c3/f1p0/852      | NA                         | R01_cb4722_c3/f1p0/852      |
| R01_cb8564_c4632/f1p0/3266  | NA                          | R01_cb8564_c4632/f1p0/3266  | R01_cb8564_c4632/f1p0/3266 | R01_cb8564_c4632/f1p0/3266  |
| R01_cb8564_c90609/f1p0/4125 | NA                          | R01_cb8564_c90609/f1p0/4125 | NA                         | NA                          |
| R01_cb17309_c2/f1p1/1188    | NA                          | NA                          | R01_cb17309_c2/f1p1/1188   | R01_cb17309_c2/f1p1/1188    |
| R01_cb11572_c0/f1p0/378     | R01_cb11572_c0/f1p0/378     | R01_cb11572_c0/f1p0/378     | R01_cb11572_c0/f1p0/378    | R01_cb11572_c0/f1p0/378     |
| R01_cb8564_c14962/f1p0/2093 | NA                          | NA                          | NA                         | R01_cb8564_c14962/f1p0/2093 |
| R01_cb5622_c5/f1p0/1617     | NA                          | NA                          | NA                         | R01_cb5622_c5/f1p0/1617     |
| R01_cb9037_c3/f1p0/2159     | NA                          | R01_cb9037_c3/f1p0/2159     | NA                         | NA                          |
| R01_cb15615_c1/f1p0/634     | NA                          | R01_cb15615_c1/f1p0/634     | NA                         | NA                          |

|                             |                           |                             |                             |                             |
|-----------------------------|---------------------------|-----------------------------|-----------------------------|-----------------------------|
| R01_cb506_c18/f1p0/2271     | NA                        | NA                          | R01_cb506_c18/f1p0/2271     | R01_cb506_c18/f1p0/2271     |
| R01_cb7151_c3/f1p0/2229     | R01_cb7151_c3/f1p0/2229   | R01_cb7151_c3/f1p0/2229     | R01_cb7151_c3/f1p0/2229     | R01_cb7151_c3/f1p0/2229     |
| R01_cb6845_c8/f2p1/2728     | NA                        | NA                          | NA                          | R01_cb6845_c8/f2p1/2728     |
| R01_cb1178_c21/f1p0/1378    | NA                        | NA                          | NA                          | R01_cb1178_c21/f1p0/1378    |
| R01_cb2738_c5/f1p0/2058     | NA                        | NA                          | NA                          | R01_cb2738_c5/f1p0/2058     |
| R01_cb8564_c1030/f1p0/1954  | NA                        | R01_cb8564_c1030/f1p0/1954  | NA                          | NA                          |
| R01_cb15768_c0/f6p0/1168    | NA                        | NA                          | NA                          | R01_cb15768_c0/f6p0/1168    |
| R01_cb2082_c37/f7p0/2806    | NA                        | NA                          | NA                          | R01_cb2082_c37/f7p0/2806    |
| R01_cb8564_c69007/f2p0/2967 | NA                        | R01_cb8564_c69007/f2p0/2967 | R01_cb8564_c69007/f2p0/2967 | NA                          |
| R01_cb10906_c1/f1p0/2092    | NA                        | NA                          | NA                          | R01_cb10906_c1/f1p0/2092    |
| R01_cb11770_c1/f1p0/2393    | NA                        | R01_cb11770_c1/f1p0/2393    | NA                          | NA                          |
| R01_cb5893_c3/f1p0/2183     | R01_cb5893_c3/f1p0/2183   | R01_cb5893_c3/f1p0/2183     | R01_cb5893_c3/f1p0/2183     | R01_cb5893_c3/f1p0/2183     |
| R01_cb12422_c18/f1p0/1709   | NA                        | NA                          | NA                          | R01_cb12422_c18/f1p0/1709   |
| R01_cb8564_c77719/f1p0/3011 | NA                        | R01_cb8564_c77719/f1p0/3011 | R01_cb8564_c77719/f1p0/3011 | R01_cb8564_c77719/f1p0/3011 |
| R01_cb8564_c127023/f1p0/228 | NA                        | R01_cb8564_c127023/f1p0/228 | R01_cb8564_c127023/f1p0/228 | NA                          |
| R01_cb2033_c8/f1p0/2427     | NA                        | NA                          | R01_cb2033_c8/f1p0/2427     | R01_cb2033_c8/f1p0/2427     |
| R01_cb13885_c5/f1p0/671     | NA                        | R01_cb13885_c5/f1p0/671     | NA                          | R01_cb13885_c5/f1p0/671     |
| R01_cb15186_c26/f15p0/475   | R01_cb15186_c26/f15p0/475 | R01_cb15186_c26/f15p0/475   | R01_cb15186_c26/f15p0/475   | NA                          |
| R01_cb17973_c27/f1p0/1103   | NA                        | R01_cb17973_c27/f1p0/1103   | R01_cb17973_c27/f1p0/1103   | R01_cb17973_c27/f1p0/1103   |
| R01_cb2710_c1/f1p0/3833     | NA                        | NA                          | NA                          | R01_cb2710_c1/f1p0/3833     |
| R01_cb8564_c21735/f1p0/4287 | NA                        | R01_cb8564_c21735/f1p0/4287 | NA                          | NA                          |
| R01_cb13025_c9/f1p0/1535    | NA                        | NA                          | NA                          | R01_cb13025_c9/f1p0/1535    |
| R01_cb10606_c2/f1p0/1156    | R01_cb10606_c2/f1p0/1156  | R01_cb10606_c2/f1p0/1156    | NA                          | NA                          |
| R01_cb18409_c77/f1p0/1058   | R01_cb18409_c77/f1p0/1058 | R01_cb18409_c77/f1p0/1058   | R01_cb18409_c77/f1p0/1058   | NA                          |
| R01_cb8564_c23727/f1p0/2755 | NA                        | R01_cb8564_c23727/f1p0/2755 | NA                          | NA                          |

|                              |                           |                              |                           |                             |
|------------------------------|---------------------------|------------------------------|---------------------------|-----------------------------|
| R01_cb15418_c0/f4p1/876      | NA                        | NA                           | NA                        | R01_cb15418_c0/f4p1/876     |
| R01_cb8564_c112163/flp0/2459 | NA                        | R01_cb8564_c112163/flp0/2459 | NA                        | NA                          |
| R01_cb17756_c14/flp0/1565    | R01_cb17756_c14/flp0/1565 | R01_cb17756_c14/flp0/1565    | R01_cb17756_c14/flp0/1565 | R01_cb17756_c14/flp0/1565   |
| R01_cb2095_c11/flp3/2401     | NA                        | NA                           | NA                        | R01_cb2095_c11/flp3/2401    |
| R01_cb13766_c10/flp0/888     | NA                        | R01_cb13766_c10/flp0/888     | NA                        | NA                          |
| R01_cb4702_c28/flp0/957      | NA                        | NA                           | NA                        | R01_cb4702_c28/flp0/957     |
| R01_cb4128_c17/flp0/2338     | NA                        | NA                           | NA                        | R01_cb4128_c17/flp0/2338    |
| R01_cb18348_c0/flp0/1144     | NA                        | R01_cb18348_c0/flp0/1144     | NA                        | NA                          |
| R01_cb16465_c4/flp0/1058     | NA                        | NA                           | NA                        | R01_cb16465_c4/flp0/1058    |
| R01_cb9882_c7/flp0/984       | R01_cb9882_c7/flp0/984    | NA                           | NA                        | NA                          |
| R01_cb8564_c77311/flp0/2386  | NA                        | NA                           | NA                        | R01_cb8564_c77311/flp0/2386 |
| R01_cb2543_c36/flp1/2737     | NA                        | R01_cb2543_c36/flp1/2737     | NA                        | NA                          |
| R01_cb1155_c22/flp0/4835     | NA                        | NA                           | NA                        | R01_cb1155_c22/flp0/4835    |
| R01_cb7519_c21/flp0/2280     | NA                        | NA                           | NA                        | R01_cb7519_c21/flp0/2280    |
| R01_cb17106_c0/f3p0/1466     | NA                        | NA                           | R01_cb17106_c0/f3p0/1466  | R01_cb17106_c0/f3p0/1466    |
| R01_cb5608_c49/flp0/3694     | NA                        | NA                           | NA                        | R01_cb5608_c49/flp0/3694    |
| R01_cb8564_c46968/flp0/2274  | NA                        | NA                           | NA                        | R01_cb8564_c46968/flp0/2274 |
| R01_cb17195_c0/flp0/322      | R01_cb17195_c0/flp0/322   | R01_cb17195_c0/flp0/322      | NA                        | NA                          |
| R01_cb8573_c4/flp0/1868      | NA                        | NA                           | NA                        | R01_cb8573_c4/flp0/1868     |
| R01_cb17442_c0/f2p0/1363     | NA                        | NA                           | NA                        | R01_cb17442_c0/f2p0/1363    |
| R01_cb14680_c2/flp0/440      | R01_cb14680_c2/flp0/440   | R01_cb14680_c2/flp0/440      | R01_cb14680_c2/flp0/440   | R01_cb14680_c2/flp0/440     |
| R01_cb6700_c9/flp0/2495      | NA                        | NA                           | NA                        | R01_cb6700_c9/flp0/2495     |
| R01_cb3818_c18/flp0/2496     | NA                        | R01_cb3818_c18/flp0/2496     | NA                        | NA                          |
| R01_cb12226_c3/flp0/373      | R01_cb12226_c3/flp0/373   | NA                           | R01_cb12226_c3/flp0/373   | NA                          |
| R01_cb9984_c1/flp0/2507      | R01_cb9984_c1/flp0/2507   | R01_cb9984_c1/flp0/2507      | R01_cb9984_c1/flp0/2507   | R01_cb9984_c1/flp0/2507     |

|                             |                         |                             |                             |                             |
|-----------------------------|-------------------------|-----------------------------|-----------------------------|-----------------------------|
| R01_cb8564_c15158/flp5/4376 | NA                      | R01_cb8564_c15158/flp5/4376 | R01_cb8564_c15158/flp5/4376 | R01_cb8564_c15158/flp5/4376 |
| R01_cb8564_c68563/f3p0/3011 | NA                      | R01_cb8564_c68563/f3p0/3011 | NA                          | NA                          |
| R01_cb5595_c12/flp0/2082    | NA                      | R01_cb5595_c12/flp0/2082    | NA                          | NA                          |
| R01_cb11212_c5/flp0/696     | NA                      | R01_cb11212_c5/flp0/696     | NA                          | NA                          |
| R01_cb16888_c3/flp0/1008    | NA                      | NA                          | R01_cb16888_c3/flp0/1008    | R01_cb16888_c3/flp0/1008    |
| R01_cb260_c19/flp0/2307     | NA                      | NA                          | NA                          | R01_cb260_c19/flp0/2307     |
| R01_cb9487_c14/flp0/1063    | NA                      | R01_cb9487_c14/flp0/1063    | NA                          | R01_cb9487_c14/flp0/1063    |
| R01_cb9841_c0/f8p0/1829     | NA                      | NA                          | NA                          | R01_cb9841_c0/f8p0/1829     |
| R01_cb544_c6/flp0/4746      | NA                      | NA                          | NA                          | R01_cb544_c6/flp0/4746      |
| R01_cb13910_c14/flp0/1630   | NA                      | R01_cb13910_c14/flp0/1630   | R01_cb13910_c14/flp0/1630   | R01_cb13910_c14/flp0/1630   |
| R01_cb17676_c0/f2p0/523     | NA                      | R01_cb17676_c0/f2p0/523     | NA                          | R01_cb17676_c0/f2p0/523     |
| R01_cb2367_c5/flp0/2867     | NA                      | R01_cb2367_c5/flp0/2867     | R01_cb2367_c5/flp0/2867     | NA                          |
| R01_cb4030_c0/f2p0/2589     | NA                      | NA                          | NA                          | R01_cb4030_c0/f2p0/2589     |
| R01_cb8564_c80921/flp1/2309 | NA                      | NA                          | NA                          | R01_cb8564_c80921/flp1/2309 |
| R01_cb8564_c85478/flp0/2221 | NA                      | R01_cb8564_c85478/flp0/2221 | R01_cb8564_c85478/flp0/2221 | R01_cb8564_c85478/flp0/2221 |
| R01_cb11210_c2/flp0/1268    | NA                      | R01_cb11210_c2/flp0/1268    | R01_cb11210_c2/flp0/1268    | R01_cb11210_c2/flp0/1268    |
| R01_cb8564_c40788/flp0/2101 | NA                      | R01_cb8564_c40788/flp0/2101 | NA                          | R01_cb8564_c40788/flp0/2101 |
| R01_cb416_c33/flp1/2908     | NA                      | NA                          | NA                          | R01_cb416_c33/flp1/2908     |
| R01_cb8564_c78312/flp0/3944 | NA                      | R01_cb8564_c78312/flp0/3944 | NA                          | NA                          |
| R01_cb8209_c0/f2p0/2294     | NA                      | NA                          | NA                          | R01_cb8209_c0/f2p0/2294     |
| R01_cb8564_c1351/f5p1/2265  | NA                      | NA                          | NA                          | R01_cb8564_c1351/f5p1/2265  |
| R01_cb2314_c2/flp0/3840     | R01_cb2314_c2/flp0/3840 | R01_cb2314_c2/flp0/3840     | NA                          | NA                          |
| R01_cb8564_c1353/flp0/3452  | NA                      | R01_cb8564_c1353/flp0/3452  | NA                          | NA                          |
| R01_cb7439_c0/flp0/2616     | NA                      | R01_cb7439_c0/flp0/2616     | NA                          | NA                          |
| R01_cb8564_c4071/flp0/2728  | NA                      | R01_cb8564_c4071/flp0/2728  | NA                          | R01_cb8564_c4071/flp0/2728  |
| R01_cb17003_c1/flp0/1176    | NA                      | NA                          | NA                          | R01_cb17003_c1/flp0/1176    |

|                              |                              |                              |                          |                             |
|------------------------------|------------------------------|------------------------------|--------------------------|-----------------------------|
| R01_cb4117_c2/f1p0/3430      | NA                           | NA                           | NA                       | R01_cb4117_c2/f1p0/3430     |
| R01_cb4702_c8/f1p0/3284      | NA                           | NA                           | NA                       | R01_cb4702_c8/f1p0/3284     |
| R01_cb8564_c111632/f1p0/2604 | NA                           | R01_cb8564_c111632/f1p0/2604 | NA                       | NA                          |
| R01_cb8023_c12/f1p0/1479     | NA                           | NA                           | R01_cb8023_c12/f1p0/1479 | R01_cb8023_c12/f1p0/1479    |
| R01_cb14657_c2/f1p0/1784     | R01_cb14657_c2/f1p0/1784     | R01_cb14657_c2/f1p0/1784     | R01_cb14657_c2/f1p0/1784 | R01_cb14657_c2/f1p0/1784    |
| R01_cb8564_c52843/f2p0/2733  | NA                           | R01_cb8564_c52843/f2p0/2733  | NA                       | R01_cb8564_c52843/f2p0/2733 |
| R01_cb18456_c4374/f1p0/644   | NA                           | NA                           | NA                       | R01_cb18456_c4374/f1p0/644  |
| R01_cb8564_c130195/f1p0/2809 | R01_cb8564_c130195/f1p0/2809 | R01_cb8564_c130195/f1p0/2809 | NA                       | NA                          |
| R01_cb13488_c12/f1p0/818     | NA                           | NA                           | NA                       | R01_cb13488_c12/f1p0/818    |
| R01_cb7528_c2/f1p0/3135      | NA                           | R01_cb7528_c2/f1p0/3135      | NA                       | NA                          |
| R01_cb8564_c11512/f1p0/1974  | NA                           | R01_cb8564_c11512/f1p0/1974  | NA                       | NA                          |
| R01_cb18022_c1/f1p0/1596     | R01_cb18022_c1/f1p0/1596     | R01_cb18022_c1/f1p0/1596     | R01_cb18022_c1/f1p0/1596 | R01_cb18022_c1/f1p0/1596    |
| R01_cb12824_c20/f1p0/1592    | NA                           | R01_cb12824_c20/f1p0/1592    | NA                       | NA                          |
| R01_cb16652_c4/f1p0/362      | R01_cb16652_c4/f1p0/362      | R01_cb16652_c4/f1p0/362      | R01_cb16652_c4/f1p0/362  | R01_cb16652_c4/f1p0/362     |
| R01_cb5051_c0/f3p0/3220      | R01_cb5051_c0/f3p0/3220      | R01_cb5051_c0/f3p0/3220      | R01_cb5051_c0/f3p0/3220  | R01_cb5051_c0/f3p0/3220     |
| R01_cb5739_c0/f1p0/2876      | NA                           | R01_cb5739_c0/f1p0/2876      | R01_cb5739_c0/f1p0/2876  | R01_cb5739_c0/f1p0/2876     |
| R01_cb15466_c4/f1p0/537      | R01_cb15466_c4/f1p0/537      | R01_cb15466_c4/f1p0/537      | NA                       | NA                          |
| R01_cb15449_c1/f1p0/1317     | NA                           | R01_cb15449_c1/f1p0/1317     | R01_cb15449_c1/f1p0/1317 | R01_cb15449_c1/f1p0/1317    |
| R01_cb16662_c3/f1p0/360      | R01_cb16662_c3/f1p0/360      | R01_cb16662_c3/f1p0/360      | R01_cb16662_c3/f1p0/360  | R01_cb16662_c3/f1p0/360     |
| R01_cb10693_c3/f1p1/1536     | NA                           | NA                           | NA                       | R01_cb10693_c3/f1p1/1536    |
| R01_cb13421_c0/f1p0/1070     | NA                           | R01_cb13421_c0/f1p0/1070     | NA                       | NA                          |
| R01_cb8564_c22279/f1p0/2983  | NA                           | R01_cb8564_c22279/f1p0/2983  | NA                       | NA                          |
| R01_cb16648_c0/f1p0/1224     | NA                           | R01_cb16648_c0/f1p0/1224     | R01_cb16648_c0/f1p0/1224 | R01_cb16648_c0/f1p0/1224    |
| R01_cb18456_c6833/f1p0/736   | R01_cb18456_c6833/f1p0/736   | R01_cb18456_c6833/f1p0/736   | NA                       | R01_cb18456_c6833/f1p0/736  |

|                             |                          |                             |                            |                          |
|-----------------------------|--------------------------|-----------------------------|----------------------------|--------------------------|
| R01_cb18187_c1/flp0/743     | NA                       | NA                          | NA                         | R01_cb18187_c1/flp0/743  |
| R01_cb9897_c4/flp0/1935     | NA                       | R01_cb9897_c4/flp0/1935     | NA                         | NA                       |
| R01_cb18456_c2501/flp0/704  | NA                       | R01_cb18456_c2501/flp0/704  | NA                         | NA                       |
| R01_cb8564_c14244/flp1/2174 | NA                       | R01_cb8564_c14244/flp1/2174 | NA                         | NA                       |
| R01_cb8002_c2/flp0/304      | R01_cb8002_c2/flp0/304   | NA                          | R01_cb8002_c2/flp0/304     | R01_cb8002_c2/flp0/304   |
| R01_cb9614_c0/flp0/2025     | NA                       | NA                          | NA                         | R01_cb9614_c0/flp0/2025  |
| R01_cb454_c10/flp0/2459     | NA                       | NA                          | NA                         | R01_cb454_c10/flp0/2459  |
| R01_cb8564_c1827/flp1/4356  | NA                       | R01_cb8564_c1827/flp1/4356  | R01_cb8564_c1827/flp1/4356 | NA                       |
| R01_cb10074_c13/flp0/474    | NA                       | R01_cb10074_c13/flp0/474    | R01_cb10074_c13/flp0/474   | R01_cb10074_c13/flp0/474 |
| R01_cb18494_c1/flp0/776     | NA                       | R01_cb18494_c1/flp0/776     | R01_cb18494_c1/flp0/776    | R01_cb18494_c1/flp0/776  |
| R01_cb2845_c29/flp0/3315    | NA                       | NA                          | NA                         | R01_cb2845_c29/flp0/3315 |
| R01_cb10583_c4/flp0/5305    | NA                       | R01_cb10583_c4/flp0/5305    | NA                         | NA                       |
| R01_cb18386_c5/flp0/1465    | NA                       | R01_cb18386_c5/flp0/1465    | NA                         | NA                       |
| R01_cb12912_c7/flp0/480     | NA                       | R01_cb12912_c7/flp0/480     | NA                         | R01_cb12912_c7/flp0/480  |
| R01_cb18537_c1/flp0/1709    | NA                       | R01_cb18537_c1/flp0/1709    | NA                         | NA                       |
| R01_cb5582_c4/flp0/1289     | NA                       | NA                          | NA                         | R01_cb5582_c4/flp0/1289  |
| R01_cb10042_c3/flp0/1672    | NA                       | NA                          | NA                         | R01_cb10042_c3/flp0/1672 |
| R01_cb10107_c1/flp0/2150    | NA                       | NA                          | NA                         | R01_cb10107_c1/flp0/2150 |
| R01_cb535_c4/flp0/4795      | NA                       | NA                          | NA                         | R01_cb535_c4/flp0/4795   |
| R01_cb10145_c4/flp0/1575    | NA                       | NA                          | NA                         | R01_cb10145_c4/flp0/1575 |
| R01_cb13112_c3/f2p0/761     | NA                       | R01_cb13112_c3/f2p0/761     | R01_cb13112_c3/f2p0/761    | R01_cb13112_c3/f2p0/761  |
| R01_cb6485_c2/flp0/2384     | NA                       | R01_cb6485_c2/flp0/2384     | NA                         | NA                       |
| R01_cb11148_c1/flp0/2728    | R01_cb11148_c1/flp0/2728 | R01_cb11148_c1/flp0/2728    | R01_cb11148_c1/flp0/2728   | NA                       |
| R01_cb11329_c2/flp0/837     | NA                       | R01_cb11329_c2/flp0/837     | NA                         | NA                       |
| R01_cb8831_c9/flp1/2228     | NA                       | R01_cb8831_c9/flp1/2228     | NA                         | R01_cb8831_c9/flp1/2228  |
| R01_cb2204_c5/flp0/5403     | R01_cb2204_c5/flp0/5403  | R01_cb2204_c5/flp0/5403     | R01_cb2204_c5/flp0/5403    | R01_cb2204_c5/flp0/5403  |

|                              |                            |                            |                              |                              |
|------------------------------|----------------------------|----------------------------|------------------------------|------------------------------|
| R01_cb8564_c3879/flp0/2868   | NA                         | NA                         | NA                           | R01_cb8564_c3879/flp0/2868   |
| R01_cb3618_c27/flp0/2821     | NA                         | NA                         | NA                           | R01_cb3618_c27/flp0/2821     |
| R01_cb10943_c10/flp0/1666    | NA                         | NA                         | NA                           | R01_cb10943_c10/flp0/1666    |
| R01_cb8400_c5/flp0/1347      | NA                         | NA                         | NA                           | R01_cb8400_c5/flp0/1347      |
| R01_cb18456_c3225/flp0/875   | NA                         | R01_cb18456_c3225/flp0/875 | NA                           | NA                           |
| R01_cb3650_c15/flp0/1409     | NA                         | R01_cb3650_c15/flp0/1409   | R01_cb3650_c15/flp0/1409     | R01_cb3650_c15/flp0/1409     |
| R01_cb18456_c7461/flp1/491   | R01_cb18456_c7461/flp1/491 | R01_cb18456_c7461/flp1/491 | NA                           | R01_cb18456_c7461/flp1/491   |
| R01_cb9707_c0/flp0/2002      | NA                         | NA                         | NA                           | R01_cb9707_c0/flp0/2002      |
| R01_cb9993_c8/flp0/1104      | NA                         | NA                         | NA                           | R01_cb9993_c8/flp0/1104      |
| R01_cb6529_c4/flp0/2774      | NA                         | NA                         | NA                           | R01_cb6529_c4/flp0/2774      |
| R01_cb8564_c129970/flp0/2025 | NA                         | NA                         | R01_cb8564_c129970/flp0/2025 | R01_cb8564_c129970/flp0/2025 |
| R01_cb9160_c2/f2p0/2150      | NA                         | R01_cb9160_c2/f2p0/2150    | R01_cb9160_c2/f2p0/2150      | R01_cb9160_c2/f2p0/2150      |
| R01_cb8094_c8/flp0/1118      | R01_cb8094_c8/flp0/1118    | R01_cb8094_c8/flp0/1118    | NA                           | R01_cb8094_c8/flp0/1118      |
| R01_cb10272_c9/f3p2/1688     | NA                         | NA                         | NA                           | R01_cb10272_c9/f3p2/1688     |
| R01_cb12912_c0/f3p0/1732     | NA                         | R01_cb12912_c0/f3p0/1732   | NA                           | R01_cb12912_c0/f3p0/1732     |
| R01_cb6258_c28/f3p1/2727     | NA                         | NA                         | NA                           | R01_cb6258_c28/f3p1/2727     |
| R01_cb13463_c4/f2p1/1348     | NA                         | NA                         | NA                           | R01_cb13463_c4/f2p1/1348     |
| R01_cb6069_c7/flp0/2320      | NA                         | NA                         | NA                           | R01_cb6069_c7/flp0/2320      |
| R01_cb15937_c3/flp0/537      | R01_cb15937_c3/flp0/537    | R01_cb15937_c3/flp0/537    | NA                           | R01_cb15937_c3/flp0/537      |
| R01_cb3426_c28/f2p1/3133     | NA                         | NA                         | NA                           | R01_cb3426_c28/f2p1/3133     |
| R01_cb9492_c0/flp0/2032      | NA                         | NA                         | R01_cb9492_c0/flp0/2032      | NA                           |
| R01_cb13445_c0/flp0/599      | NA                         | R01_cb13445_c0/flp0/599    | NA                           | NA                           |
| R01_cb8298_c3/flp1/2277      | R01_cb8298_c3/flp1/2277    | R01_cb8298_c3/flp1/2277    | R01_cb8298_c3/flp1/2277      | R01_cb8298_c3/flp1/2277      |
| R01_cb10847_c2/flp0/1850     | NA                         | R01_cb10847_c2/flp0/1850   | NA                           | NA                           |
| R01_cb10191_c2/flp0/1632     | NA                         | NA                         | NA                           | R01_cb10191_c2/flp0/1632     |

|                              |                             |                              |                              |                              |
|------------------------------|-----------------------------|------------------------------|------------------------------|------------------------------|
| R01_cb1628_c3/flp0/2275      | NA                          | NA                           | NA                           | R01_cb1628_c3/flp0/2275      |
| R01_cb5297_c7/flp0/914       | NA                          | R01_cb5297_c7/flp0/914       | NA                           | NA                           |
| R01_cb8564_c124360/flp0/2240 | NA                          | R01_cb8564_c124360/flp0/2240 | R01_cb8564_c124360/flp0/2240 | R01_cb8564_c124360/flp0/2240 |
| R01_cb10049_c2/flp0/565      | R01_cb10049_c2/flp0/565     | R01_cb10049_c2/flp0/565      | R01_cb10049_c2/flp0/565      | R01_cb10049_c2/flp0/565      |
| R01_cb6348_c4/flp0/2643      | NA                          | NA                           | NA                           | R01_cb6348_c4/flp0/2643      |
| R01_cb15461_c4/flp0/990      | R01_cb15461_c4/flp0/990     | R01_cb15461_c4/flp0/990      | NA                           | R01_cb15461_c4/flp0/990      |
| R01_cb16645_c27/flp0/1774    | NA                          | R01_cb16645_c27/flp0/1774    | R01_cb16645_c27/flp0/1774    | R01_cb16645_c27/flp0/1774    |
| R01_cb9949_c1/flp0/4100      | NA                          | R01_cb9949_c1/flp0/4100      | R01_cb9949_c1/flp0/4100      | NA                           |
| R01_cb8564_c89368/flp0/3386  | NA                          | NA                           | NA                           | R01_cb8564_c89368/flp0/3386  |
| R01_cb2700_c3/flp0/2436      | NA                          | R01_cb2700_c3/flp0/2436      | NA                           | NA                           |
| R01_cb7334_c9/f2p0/1757      | NA                          | NA                           | NA                           | R01_cb7334_c9/f2p0/1757      |
| R01_cb16808_c1/flp0/693      | NA                          | R01_cb16808_c1/flp0/693      | NA                           | NA                           |
| R01_cb6048_c5/flp0/2730      | NA                          | R01_cb6048_c5/flp0/2730      | NA                           | NA                           |
| R01_cb6014_c2/flp0/2966      | NA                          | NA                           | NA                           | R01_cb6014_c2/flp0/2966      |
| R01_cb8564_c44139/flp0/3415  | NA                          | R01_cb8564_c44139/flp0/3415  | NA                           | R01_cb8564_c44139/flp0/3415  |
| R01_cb8564_c15336/f2p1/3893  | NA                          | NA                           | NA                           | R01_cb8564_c15336/f2p1/3893  |
| R01_cb3344_c5/flp0/4842      | NA                          | NA                           | NA                           | R01_cb3344_c5/flp0/4842      |
| R01_cb454_c7/flp0/2374       | NA                          | NA                           | NA                           | R01_cb454_c7/flp0/2374       |
| R01_cb4501_c11/flp0/2194     | NA                          | NA                           | NA                           | R01_cb4501_c11/flp0/2194     |
| R01_cb4198_c4/flp0/2477      | NA                          | NA                           | NA                           | R01_cb4198_c4/flp0/2477      |
| R01_cb8564_c81836/flp0/1971  | R01_cb8564_c81836/flp0/1971 | R01_cb8564_c81836/flp0/1971  | NA                           | R01_cb8564_c81836/flp0/1971  |
| R01_cb15828_c1/flp0/958      | NA                          | R01_cb15828_c1/flp0/958      | R01_cb15828_c1/flp0/958      | R01_cb15828_c1/flp0/958      |
| R01_cb3750_c20/flp3/3049     | NA                          | NA                           | NA                           | R01_cb3750_c20/flp3/3049     |
| R01_cb10337_c7/flp2/785      | NA                          | R01_cb10337_c7/flp2/785      | NA                           | NA                           |



|                              |                             |                             |                             |                              |
|------------------------------|-----------------------------|-----------------------------|-----------------------------|------------------------------|
| R01_cb5386_c56/flp1/2155     | NA                          | R01_cb5386_c56/flp1/2155    | NA                          | NA                           |
| R01_cb5468_c3/flp0/2739      | NA                          | R01_cb5468_c3/flp0/2739     | NA                          | NA                           |
| R01_cb5054_c0/flp0/3185      | NA                          | R01_cb5054_c0/flp0/3185     | NA                          | NA                           |
| R01_cb16273_c1/flp0/592      | NA                          | R01_cb16273_c1/flp0/592     | NA                          | R01_cb16273_c1/flp0/592      |
| R01_cb11148_c5/flp0/549      | NA                          | R01_cb11148_c5/flp0/549     | NA                          | R01_cb11148_c5/flp0/549      |
| R01_cb10340_c3/flp0/2798     | NA                          | R01_cb10340_c3/flp0/2798    | NA                          | NA                           |
| R01_cb5297_c2/flp0/2708      | NA                          | R01_cb5297_c2/flp0/2708     | NA                          | NA                           |
| R01_cb8564_c15044/flp0/3492  | NA                          | R01_cb8564_c15044/flp0/3492 | NA                          | NA                           |
| R01_cb1505_c65/f4p0/1424     | NA                          | R01_cb1505_c65/f4p0/1424    | R01_cb1505_c65/f4p0/1424    | R01_cb1505_c65/f4p0/1424     |
| R01_cb8600_c1/flp0/2322      | NA                          | R01_cb8600_c1/flp0/2322     | NA                          | NA                           |
| R01_cb8564_c79863/flp0/2280  | NA                          | NA                          | NA                          | R01_cb8564_c79863/flp0/2280  |
| R01_cb14660_c8/flp0/831      | NA                          | R01_cb14660_c8/flp0/831     | NA                          | R01_cb14660_c8/flp0/831      |
| R01_cb18090_c1/flp0/746      | NA                          | R01_cb18090_c1/flp0/746     | NA                          | NA                           |
| R01_cb8564_c106737/f2p0/2097 | NA                          | NA                          | NA                          | R01_cb8564_c106737/f2p0/2097 |
| R01_cb12003_c147/flp0/1313   | NA                          | R01_cb12003_c147/flp0/1313  | R01_cb12003_c147/flp0/1313  | NA                           |
| R01_cb6629_c1/flp0/2809      | NA                          | R01_cb6629_c1/flp0/2809     | NA                          | NA                           |
| R01_cb4657_c8/flp0/3762      | NA                          | NA                          | R01_cb4657_c8/flp0/3762     | NA                           |
| R01_cb13572_c0/f2p0/558      | NA                          | NA                          | NA                          | R01_cb13572_c0/f2p0/558      |
| R01_cb2875_c8/flp0/3946      | NA                          | NA                          | NA                          | R01_cb2875_c8/flp0/3946      |
| R01_cb3941_c39/flp0/4473     | NA                          | R01_cb3941_c39/flp0/4473    | NA                          | NA                           |
| R01_cb1388_c0/f3p0/4208      | NA                          | NA                          | NA                          | R01_cb1388_c0/f3p0/4208      |
| R01_cb5017_c2/flp0/2301      | NA                          | NA                          | NA                          | R01_cb5017_c2/flp0/2301      |
| R01_cb8564_c77049/flp0/2003  | R01_cb8564_c77049/flp0/2003 | R01_cb8564_c77049/flp0/2003 | R01_cb8564_c77049/flp0/2003 | R01_cb8564_c77049/flp0/2003  |
| R01_cb17452_c6/flp0/937      | NA                          | R01_cb17452_c6/flp0/937     | NA                          | NA                           |

|                             |                             |                             |                             |                             |
|-----------------------------|-----------------------------|-----------------------------|-----------------------------|-----------------------------|
| R01_cb3550_c1/f1p0/3606     | NA                          | R01_cb3550_c1/f1p0/3606     | NA                          | R01_cb3550_c1/f1p0/3606     |
| R01_cb8564_c21550/f1p0/2219 | NA                          | R01_cb8564_c21550/f1p0/2219 | NA                          | NA                          |
| R01_cb3068_c3/f1p0/2722     | NA                          | NA                          | NA                          | R01_cb3068_c3/f1p0/2722     |
| R01_cb10200_c4/f1p0/3731    | NA                          | R01_cb10200_c4/f1p0/3731    | NA                          | NA                          |
| R01_cb13565_c20/f1p0/866    | NA                          | R01_cb13565_c20/f1p0/866    | NA                          | NA                          |
| R01_cb4321_c9/f1p0/999      | NA                          | NA                          | NA                          | R01_cb4321_c9/f1p0/999      |
| R01_cb18365_c2/f1p0/881     | R01_cb18365_c2/f1p0/881     | R01_cb18365_c2/f1p0/881     | R01_cb18365_c2/f1p0/881     | R01_cb18365_c2/f1p0/881     |
| R01_cb8564_c10832/f3p0/2415 | NA                          | R01_cb8564_c10832/f3p0/2415 | R01_cb8564_c10832/f3p0/2415 | R01_cb8564_c10832/f3p0/2415 |
| R01_cb449_c13/f1p0/2593     | NA                          | NA                          | NA                          | R01_cb449_c13/f1p0/2593     |
| R01_cb18232_c0/f2p0/497     | R01_cb18232_c0/f2p0/497     | R01_cb18232_c0/f2p0/497     | R01_cb18232_c0/f2p0/497     | R01_cb18232_c0/f2p0/497     |
| R01_cb18456_c7602/f1p0/414  | R01_cb18456_c7602/f1p0/414  | R01_cb18456_c7602/f1p0/414  | R01_cb18456_c7602/f1p0/414  | R01_cb18456_c7602/f1p0/414  |
| R01_cb13907_c7/f1p0/870     | NA                          | NA                          | NA                          | R01_cb13907_c7/f1p0/870     |
| R01_cb625_c11/f1p0/1768     | NA                          | R01_cb625_c11/f1p0/1768     | NA                          | NA                          |
| R01_cb17744_c15/f1p0/4007   | NA                          | NA                          | NA                          | R01_cb17744_c15/f1p0/4007   |
| R01_cb10417_c2/f1p0/837     | NA                          | R01_cb10417_c2/f1p0/837     | NA                          | NA                          |
| R01_cb15891_c2/f1p0/820     | NA                          | R01_cb15891_c2/f1p0/820     | NA                          | NA                          |
| R01_cb13894_c3/f1p0/546     | NA                          | R01_cb13894_c3/f1p0/546     | NA                          | NA                          |
| R01_cb822_c9/f1p3/4612      | NA                          | NA                          | NA                          | R01_cb822_c9/f1p3/4612      |
| R01_cb17520_c0/f2p0/1050    | NA                          | NA                          | NA                          | R01_cb17520_c0/f2p0/1050    |
| R01_cb8120_c2/f1p1/2430     | NA                          | NA                          | NA                          | R01_cb8120_c2/f1p1/2430     |
| R01_cb18409_c128/f1p0/964   | NA                          | R01_cb18409_c128/f1p0/964   | NA                          | NA                          |
| R01_cb15796_c7/f1p0/938     | NA                          | NA                          | NA                          | R01_cb15796_c7/f1p0/938     |
| R01_cb4825_c11/f1p0/4859    | NA                          | NA                          | NA                          | R01_cb4825_c11/f1p0/4859    |
| R01_cb8564_c15536/f1p0/2715 | R01_cb8564_c15536/f1p0/2715 | R01_cb8564_c15536/f1p0/2715 | R01_cb8564_c15536/f1p0/2715 | R01_cb8564_c15536/f1p0/2715 |
| R01_cb11938_c3/f2p0/360     | NA                          | R01_cb11938_c3/f2p0/360     | NA                          | R01_cb11938_c3/f2p0/360     |

|                              |                           |                              |                              |                              |
|------------------------------|---------------------------|------------------------------|------------------------------|------------------------------|
| R01_cb3938_c0/flp0/3479      | NA                        | R01_cb3938_c0/flp0/3479      | NA                           | NA                           |
| R01_cb6861_c3/flp0/3622      | NA                        | R01_cb6861_c3/flp0/3622      | R01_cb6861_c3/flp0/3622      | R01_cb6861_c3/flp0/3622      |
| R01_cb11676_c2/flp0/1089     | NA                        | NA                           | NA                           | R01_cb11676_c2/flp0/1089     |
| R01_cb4519_c0/flp0/3323      | NA                        | R01_cb4519_c0/flp0/3323      | NA                           | NA                           |
| R01_cb16997_c70/flp0/2346    | NA                        | R01_cb16997_c70/flp0/2346    | NA                           | R01_cb16997_c70/flp0/2346    |
| R01_cb8564_c112837/flp0/2319 | NA                        | NA                           | NA                           | R01_cb8564_c112837/flp0/2319 |
| R01_cb9365_c2/flp1/2005      | NA                        | NA                           | NA                           | R01_cb9365_c2/flp1/2005      |
| R01_cb1860_c15/flp2/2457     | NA                        | NA                           | NA                           | R01_cb1860_c15/flp2/2457     |
| R01_cb8564_c185851/flp0/2077 | NA                        | R01_cb8564_c185851/flp0/2077 | R01_cb8564_c185851/flp0/2077 | R01_cb8564_c185851/flp0/2077 |
| R01_cb12314_c4/flp0/422      | NA                        | NA                           | R01_cb12314_c4/flp0/422      | NA                           |
| R01_cb7254_c7/flp0/2281      | NA                        | NA                           | NA                           | R01_cb7254_c7/flp0/2281      |
| R01_cb3307_c7/f2p0/3452      | NA                        | NA                           | NA                           | R01_cb3307_c7/f2p0/3452      |
| R01_cb12686_c0/f2p0/436      | NA                        | NA                           | NA                           | R01_cb12686_c0/f2p0/436      |
| R01_cb8564_c118029/flp0/2642 | NA                        | NA                           | NA                           | R01_cb8564_c118029/flp0/2642 |
| R01_cb11395_c4/flp0/1250     | NA                        | NA                           | NA                           | R01_cb11395_c4/flp0/1250     |
| R01_cb8975_c5/flp0/2225      | NA                        | R01_cb8975_c5/flp0/2225      | NA                           | R01_cb8975_c5/flp0/2225      |
| R01_cb18409_c88/flp0/760     | R01_cb18409_c88/flp0/760  | R01_cb18409_c88/flp0/760     | R01_cb18409_c88/flp0/760     | R01_cb18409_c88/flp0/760     |
| R01_cb16312_c1/flp0/962      | NA                        | R01_cb16312_c1/flp0/962      | NA                           | NA                           |
| R01_cb920_c17/flp0/4399      | NA                        | NA                           | NA                           | R01_cb920_c17/flp0/4399      |
| R01_cb13433_c34/f2p0/2517    | R01_cb13433_c34/f2p0/2517 | R01_cb13433_c34/f2p0/2517    | NA                           | R01_cb13433_c34/f2p0/2517    |
| R01_cb18456_c4734/flp0/513   | NA                        | NA                           | NA                           | R01_cb18456_c4734/flp0/513   |
| R01_cb10029_c1463/flp0/790   | NA                        | R01_cb10029_c1463/flp0/790   | NA                           | NA                           |
| R01_cb11243_c0/flp0/1580     | NA                        | R01_cb11243_c0/flp0/1580     | NA                           | NA                           |

|                             |                            |                             |                          |                            |
|-----------------------------|----------------------------|-----------------------------|--------------------------|----------------------------|
| R01_cb12554_c4/flp0/1603    | NA                         | NA                          | NA                       | R01_cb12554_c4/flp0/1603   |
| R01_cb10306_c1/f2p0/850     | R01_cb10306_c1/f2p0/850    | R01_cb10306_c1/f2p0/850     | NA                       | R01_cb10306_c1/f2p0/850    |
| R01_cb17363_c4/flp0/1060    | R01_cb17363_c4/flp0/1060   | R01_cb17363_c4/flp0/1060    | R01_cb17363_c4/flp0/1060 | NA                         |
| R01_cb12444_c57/flp0/497    | NA                         | R01_cb12444_c57/flp0/497    | R01_cb12444_c57/flp0/497 | R01_cb12444_c57/flp0/497   |
| R01_cb13488_c7/flp0/1010    | NA                         | R01_cb13488_c7/flp0/1010    | NA                       | R01_cb13488_c7/flp0/1010   |
| R01_cb8088_c0/flp0/2457     | NA                         | R01_cb8088_c0/flp0/2457     | NA                       | NA                         |
| R01_cb639_c1/flp0/4709      | NA                         | R01_cb639_c1/flp0/4709      | NA                       | R01_cb639_c1/flp0/4709     |
| R01_cb18591_c0/flp0/692     | R01_cb18591_c0/flp0/692    | R01_cb18591_c0/flp0/692     | R01_cb18591_c0/flp0/692  | R01_cb18591_c0/flp0/692    |
| R01_cb18456_c4786/flp0/485  | R01_cb18456_c4786/flp0/485 | R01_cb18456_c4786/flp0/485  | NA                       | R01_cb18456_c4786/flp0/485 |
| R01_cb2272_c4/flp0/2783     | NA                         | NA                          | NA                       | R01_cb2272_c4/flp0/2783    |
| R01_cb9882_c4/flp0/1622     | R01_cb9882_c4/flp0/1622    | R01_cb9882_c4/flp0/1622     | R01_cb9882_c4/flp0/1622  | R01_cb9882_c4/flp0/1622    |
| R01_cb1982_c5/flp0/1626     | R01_cb1982_c5/flp0/1626    | R01_cb1982_c5/flp0/1626     | R01_cb1982_c5/flp0/1626  | R01_cb1982_c5/flp0/1626    |
| R01_cb2788_c5/flp0/4276     | NA                         | R01_cb2788_c5/flp0/4276     | NA                       | NA                         |
| R01_cb16319_c1/flp0/807     | NA                         | NA                          | NA                       | R01_cb16319_c1/flp0/807    |
| R01_cb8564_c51299/flp0/3097 | NA                         | R01_cb8564_c51299/flp0/3097 | NA                       | NA                         |
| R01_cb8564_c20204/flp0/3519 | NA                         | R01_cb8564_c20204/flp0/3519 | NA                       | NA                         |
| R01_cb17878_c1/flp0/1825    | NA                         | NA                          | R01_cb17878_c1/flp0/1825 | R01_cb17878_c1/flp0/1825   |
| R01_cb8564_c43143/flp0/4280 | NA                         | R01_cb8564_c43143/flp0/4280 | NA                       | NA                         |
| R01_cb17374_c0/f5p1/712     | NA                         | NA                          | NA                       | R01_cb17374_c0/f5p1/712    |
| R01_cb6608_c5/flp1/2467     | NA                         | NA                          | NA                       | R01_cb6608_c5/flp1/2467    |
| R01_cb17082_c1/flp0/585     | R01_cb17082_c1/flp0/585    | R01_cb17082_c1/flp0/585     | R01_cb17082_c1/flp0/585  | R01_cb17082_c1/flp0/585    |
| R01_cb742_c24/flp0/1369     | NA                         | NA                          | NA                       | R01_cb742_c24/flp0/1369    |
| R01_cb10251_c2/flp0/4086    | NA                         | R01_cb10251_c2/flp0/4086    | NA                       | NA                         |
| R01_cb14226_c3/flp0/688     | NA                         | NA                          | R01_cb14226_c3/flp0/688  | R01_cb14226_c3/flp0/688    |
| R01_cb5144_c5/flp0/1716     | NA                         | R01_cb5144_c5/flp0/1716     | NA                       | R01_cb5144_c5/flp0/1716    |
| R01_cb4639_c8/flp0/2579     | NA                         | NA                          | NA                       | R01_cb4639_c8/flp0/2579    |

|                                  |                                  |                                  |                             |                                  |
|----------------------------------|----------------------------------|----------------------------------|-----------------------------|----------------------------------|
| R01_cb8564_c125207/flp0/258<br>7 | NA                               | R01_cb8564_c125207/flp0/258<br>7 | NA                          | NA                               |
| R01_cb6802_c39/flp0/3232         | R01_cb6802_c39/flp0/3232         | R01_cb6802_c39/flp0/3232         | NA                          | NA                               |
| R01_cb8564_c51335/flp0/2219      | NA                               | R01_cb8564_c51335/flp0/2219      | R01_cb8564_c51335/flp0/2219 | R01_cb8564_c51335/flp0/2219      |
| R01_cb8037_c4/flp0/1609          | NA                               | NA                               | NA                          | R01_cb8037_c4/flp0/1609          |
| R01_cb2160_c20/flp0/3175         | NA                               | NA                               | NA                          | R01_cb2160_c20/flp0/3175         |
| R01_cb12634_c0/flp0/602          | R01_cb12634_c0/flp0/602          | R01_cb12634_c0/flp0/602          | R01_cb12634_c0/flp0/602     | R01_cb12634_c0/flp0/602          |
| R01_cb12641_c15/flp0/689         | NA                               | R01_cb12641_c15/flp0/689         | R01_cb12641_c15/flp0/689    | R01_cb12641_c15/flp0/689         |
| R01_cb11547_c1/flp0/1452         | R01_cb11547_c1/flp0/1452         | R01_cb11547_c1/flp0/1452         | R01_cb11547_c1/flp0/1452    | R01_cb11547_c1/flp0/1452         |
| R01_cb15032_c1/flp0/1100         | NA                               | NA                               | NA                          | R01_cb15032_c1/flp0/1100         |
| R01_cb5720_c1/flp0/3027          | NA                               | NA                               | NA                          | R01_cb5720_c1/flp0/3027          |
| R01_cb2637_c10/flp0/2610         | NA                               | R01_cb2637_c10/flp0/2610         | NA                          | NA                               |
| R01_cb8564_c69701/flp0/3032<br>2 | R01_cb8564_c69701/flp0/3032<br>2 | R01_cb8564_c69701/flp0/3032      | R01_cb8564_c69701/flp0/3032 | R01_cb8564_c69701/flp0/3032      |
| R01_cb9606_c84/flp0/1598         | NA                               | NA                               | NA                          | R01_cb9606_c84/flp0/1598         |
| R01_cb8564_c86196/flp0/2588      | NA                               | NA                               | NA                          | R01_cb8564_c86196/flp0/2588      |
| R01_cb4744_c0/f2p0/2942          | NA                               | R01_cb4744_c0/f2p0/2942          | R01_cb4744_c0/f2p0/2942     | R01_cb4744_c0/f2p0/2942          |
| R01_cb6170_c23/flp1/2670         | NA                               | NA                               | NA                          | R01_cb6170_c23/flp1/2670         |
| R01_cb6501_c3/flp1/2434          | NA                               | R01_cb6501_c3/flp1/2434          | NA                          | NA                               |
| R01_cb18081_c0/flp0/1114         | NA                               | R01_cb18081_c0/flp0/1114         | NA                          | NA                               |
| R01_cb5190_c3/flp0/3169          | NA                               | NA                               | NA                          | R01_cb5190_c3/flp0/3169          |
| R01_cb2533_c10/flp0/2206         | NA                               | R01_cb2533_c10/flp0/2206         | NA                          | NA                               |
| R01_cb8564_c24026/flp0/4553      | NA                               | R01_cb8564_c24026/flp0/4553      | NA                          | NA                               |
| R01_cb2154_c12/flp0/2249         | NA                               | R01_cb2154_c12/flp0/2249         | NA                          | NA                               |
| R01_cb8564_c124040/flp0/199<br>4 | NA                               | R01_cb8564_c124040/flp0/199<br>4 | NA                          | R01_cb8564_c124040/flp0/199<br>4 |

|                             |                            |                             |                             |                             |
|-----------------------------|----------------------------|-----------------------------|-----------------------------|-----------------------------|
| R01_cb13726_c2/flp0/834     | NA                         | NA                          | NA                          | R01_cb13726_c2/flp0/834     |
| R01_cb15855_c1/flp1/1233    | NA                         | NA                          | NA                          | R01_cb15855_c1/flp1/1233    |
| R01_cb18456_c1825/flp0/1371 | NA                         | R01_cb18456_c1825/flp0/1371 | NA                          | NA                          |
| R01_cb4229_c3/flp0/3383     | NA                         | NA                          | NA                          | R01_cb4229_c3/flp0/3383     |
| R01_cb11109_c1/flp0/2040    | NA                         | NA                          | NA                          | R01_cb11109_c1/flp0/2040    |
| R01_cb9646_c1/flp0/2024     | NA                         | NA                          | NA                          | R01_cb9646_c1/flp0/2024     |
| R01_cb10230_c10/f7p0/530    | NA                         | R01_cb10230_c10/f7p0/530    | NA                          | NA                          |
| R01_cb12422_c7/flp0/1802    | NA                         | NA                          | NA                          | R01_cb12422_c7/flp0/1802    |
| R01_cb2902_c0/flp0/3769     | NA                         | R01_cb2902_c0/flp0/3769     | NA                          | NA                          |
| R01_cb6794_c33/flp0/2230    | NA                         | R01_cb6794_c33/flp0/2230    | NA                          | R01_cb6794_c33/flp0/2230    |
| R01_cb1437_c4/flp0/3935     | NA                         | NA                          | NA                          | R01_cb1437_c4/flp0/3935     |
| R01_cb15647_c1/flp0/1131    | NA                         | NA                          | NA                          | R01_cb15647_c1/flp0/1131    |
| R01_cb14956_c2/f7p0/768     | NA                         | R01_cb14956_c2/f7p0/768     | NA                          | R01_cb14956_c2/f7p0/768     |
| R01_cb8564_c68819/f5p0/2092 | NA                         | R01_cb8564_c68819/f5p0/2092 | R01_cb8564_c68819/f5p0/2092 | R01_cb8564_c68819/f5p0/2092 |
| R01_cb5331_c4/flp0/581      | R01_cb5331_c4/flp0/581     | R01_cb5331_c4/flp0/581      | R01_cb5331_c4/flp0/581      | R01_cb5331_c4/flp0/581      |
| R01_cb16266_c0/f2p0/596     | R01_cb16266_c0/f2p0/596    | R01_cb16266_c0/f2p0/596     | R01_cb16266_c0/f2p0/596     | R01_cb16266_c0/f2p0/596     |
| R01_cb7214_c12/flp1/1806    | NA                         | NA                          | NA                          | R01_cb7214_c12/flp1/1806    |
| R01_cb9987_c2/flp0/2237     | NA                         | R01_cb9987_c2/flp0/2237     | NA                          | R01_cb9987_c2/flp0/2237     |
| R01_cb18456_c4663/flp2/481  | R01_cb18456_c4663/flp2/481 | R01_cb18456_c4663/flp2/481  | NA                          | R01_cb18456_c4663/flp2/481  |
| R01_cb12785_c35/flp0/980    | NA                         | NA                          | R01_cb12785_c35/flp0/980    | NA                          |
| R01_cb18153_c2/flp0/423     | R01_cb18153_c2/flp0/423    | R01_cb18153_c2/flp0/423     | NA                          | R01_cb18153_c2/flp0/423     |
| R01_cb8564_c81876/flp0/2906 | NA                         | R01_cb8564_c81876/flp0/2906 | NA                          | NA                          |
| R01_cb226_c4/flp0/2584      | NA                         | NA                          | NA                          | R01_cb226_c4/flp0/2584      |
| R01_cb13025_c3/f2p1/1451    | NA                         | NA                          | NA                          | R01_cb13025_c3/f2p1/1451    |
| R01_cb7731_c4/flp0/1810     | R01_cb7731_c4/flp0/1810    | R01_cb7731_c4/flp0/1810     | NA                          | R01_cb7731_c4/flp0/1810     |
| R01_cb15710_c1/flp0/472     | NA                         | R01_cb15710_c1/flp0/472     | NA                          | R01_cb15710_c1/flp0/472     |

|                              |                         |                            |                             |                              |
|------------------------------|-------------------------|----------------------------|-----------------------------|------------------------------|
| R01_cb8991_c12/flp0/1805     | NA                      | NA                         | NA                          | R01_cb8991_c12/flp0/1805     |
| R01_cb12603_c4/f3p0/1706     | NA                      | NA                         | R01_cb12603_c4/f3p0/1706    | R01_cb12603_c4/f3p0/1706     |
| R01_cb17023_c3/flp0/1027     | NA                      | NA                         | R01_cb17023_c3/flp0/1027    | R01_cb17023_c3/flp0/1027     |
| R01_cb9373_c2/flp0/2856      | R01_cb9373_c2/flp0/2856 | R01_cb9373_c2/flp0/2856    | NA                          | NA                           |
| R01_cb8564_c15674/flp1/3939  | NA                      | NA                         | R01_cb8564_c15674/flp1/3939 | NA                           |
| R01_cb18456_c3244/flp2/984   | NA                      | R01_cb18456_c3244/flp2/984 | NA                          | NA                           |
| R01_cb7214_c11/flp0/1870     | NA                      | NA                         | NA                          | R01_cb7214_c11/flp0/1870     |
| R01_cb17715_c1/flp0/1776     | NA                      | NA                         | NA                          | R01_cb17715_c1/flp0/1776     |
| R01_cb8564_c35935/flp0/4149  | NA                      | NA                         | NA                          | R01_cb8564_c35935/flp0/4149  |
| R01_cb10368_c3/flp0/764      | NA                      | R01_cb10368_c3/flp0/764    | R01_cb10368_c3/flp0/764     | R01_cb10368_c3/flp0/764      |
| R01_cb10398_c19/flp0/607     | NA                      | R01_cb10398_c19/flp0/607   | R01_cb10398_c19/flp0/607    | R01_cb10398_c19/flp0/607     |
| R01_cb15413_c1/flp0/696      | NA                      | R01_cb15413_c1/flp0/696    | NA                          | NA                           |
| R01_cb8564_c124906/flp0/2560 | NA                      | NA                         | NA                          | R01_cb8564_c124906/flp0/2560 |
| R01_cb3667_c10/flp0/1178     | NA                      | NA                         | NA                          | R01_cb3667_c10/flp0/1178     |
| R01_cb2851_c9/flp0/2585      | NA                      | NA                         | NA                          | R01_cb2851_c9/flp0/2585      |
| R01_cb9846_c2/flp0/1844      | NA                      | R01_cb9846_c2/flp0/1844    | R01_cb9846_c2/flp0/1844     | R01_cb9846_c2/flp0/1844      |
| R01_cb16341_c8/flp0/526      | R01_cb16341_c8/flp0/526 | R01_cb16341_c8/flp0/526    | R01_cb16341_c8/flp0/526     | R01_cb16341_c8/flp0/526      |
| R01_cb7367_c0/f7p1/2403      | NA                      | NA                         | NA                          | R01_cb7367_c0/f7p1/2403      |
| R01_cb8564_c81742/flp0/3716  | NA                      | NA                         | NA                          | R01_cb8564_c81742/flp0/3716  |
| R01_cb2991_c13/flp0/2718     | NA                      | NA                         | NA                          | R01_cb2991_c13/flp0/2718     |
| R01_cb4570_c3/flp0/3808      | NA                      | R01_cb4570_c3/flp0/3808    | NA                          | NA                           |
| R01_cb5468_c4/flp0/3066      | NA                      | R01_cb5468_c4/flp0/3066    | NA                          | NA                           |
| R01_cb14882_c0/flp0/1874     | NA                      | NA                         | NA                          | R01_cb14882_c0/flp0/1874     |
| R01_cb12361_c5/flp0/1778     | NA                      | NA                         | R01_cb12361_c5/flp0/1778    | R01_cb12361_c5/flp0/1778     |
| R01_cb3219_c1/flp1/3698      | NA                      | R01_cb3219_c1/flp1/3698    | NA                          | R01_cb3219_c1/flp1/3698      |

|                             |                             |                             |                             |                             |
|-----------------------------|-----------------------------|-----------------------------|-----------------------------|-----------------------------|
| R01_cb8564_c87681/flp0/3343 | NA                          | R01_cb8564_c87681/flp0/3343 | R01_cb8564_c87681/flp0/3343 | R01_cb8564_c87681/flp0/3343 |
| R01_cb14882_c6/flp0/997     | R01_cb14882_c6/flp0/997     | R01_cb14882_c6/flp0/997     | NA                          | NA                          |
| R01_cb7100_c0/flp0/2696     | R01_cb7100_c0/flp0/2696     | R01_cb7100_c0/flp0/2696     | R01_cb7100_c0/flp0/2696     | R01_cb7100_c0/flp0/2696     |
| R01_cb5669_c9/flp0/1210     | NA                          | R01_cb5669_c9/flp0/1210     | NA                          | NA                          |
| R01_cb14660_c10/flp0/549    | NA                          | R01_cb14660_c10/flp0/549    | R01_cb14660_c10/flp0/549    | R01_cb14660_c10/flp0/549    |
| R01_cb12003_c65/flp0/1149   | NA                          | R01_cb12003_c65/flp0/1149   | NA                          | NA                          |
| R01_cb15951_c4/flp0/698     | NA                          | R01_cb15951_c4/flp0/698     | R01_cb15951_c4/flp0/698     | R01_cb15951_c4/flp0/698     |
| R01_cb13545_c18/flp0/776    | R01_cb13545_c18/flp0/776    | R01_cb13545_c18/flp0/776    | NA                          | R01_cb13545_c18/flp0/776    |
| R01_cb8564_c72788/flp0/2855 | NA                          | R01_cb8564_c72788/flp0/2855 | NA                          | R01_cb8564_c72788/flp0/2855 |
| R01_cb8564_c34238/f4p1/4317 | NA                          | NA                          | NA                          | R01_cb8564_c34238/f4p1/4317 |
| R01_cb10307_c4/flp0/2845    | NA                          | R01_cb10307_c4/flp0/2845    | NA                          | NA                          |
| R01_cb8564_c113568/flp0/245 | R01_cb8564_c113568/flp0/245 | R01_cb8564_c113568/flp0/245 | R01_cb8564_c113568/flp0/245 | R01_cb8564_c113568/flp0/245 |
| 5                           | 55                          | 5                           | 5                           | 5                           |
| R01_cb16137_c2/flp0/1718    | NA                          | NA                          | NA                          | R01_cb16137_c2/flp0/1718    |
| R01_cb14156_c0/flp0/545     | R01_cb14156_c0/flp0/545     | R01_cb14156_c0/flp0/545     | R01_cb14156_c0/flp0/545     | R01_cb14156_c0/flp0/545     |
| R01_cb18456_c7559/flp0/818  | R01_cb18456_c7559/flp0/818  | R01_cb18456_c7559/flp0/818  | R01_cb18456_c7559/flp0/818  | R01_cb18456_c7559/flp0/818  |
| R01_cb8564_c24460/flp0/4466 | NA                          | R01_cb8564_c24460/flp0/4466 | NA                          | NA                          |
| R01_cb14758_c4/flp0/575     | NA                          | R01_cb14758_c4/flp0/575     | R01_cb14758_c4/flp0/575     | R01_cb14758_c4/flp0/575     |
| R01_cb8564_c110624/flp0/272 | NA                          | R01_cb8564_c110624/flp0/272 | R01_cb8564_c110624/flp0/272 | R01_cb8564_c110624/flp0/272 |
| 5                           | NA                          | 5                           | 5                           | 5                           |
| R01_cb16728_c0/f2p0/1120    | NA                          | NA                          | NA                          | R01_cb16728_c0/f2p0/1120    |
| R01_cb18506_c1/flp0/724     | NA                          | R01_cb18506_c1/flp0/724     | R01_cb18506_c1/flp0/724     | R01_cb18506_c1/flp0/724     |
| R01_cb14080_c6/flp0/1818    | NA                          | R01_cb14080_c6/flp0/1818    | NA                          | NA                          |
| R01_cb1510_c0/flp0/4164     | NA                          | NA                          | NA                          | R01_cb1510_c0/flp0/4164     |
| R01_cb8564_c91083/flp0/2192 | NA                          | R01_cb8564_c91083/flp0/2192 | NA                          | R01_cb8564_c91083/flp0/2192 |
| R01_cb9720_c6/flp0/1821     | NA                          | NA                          | NA                          | R01_cb9720_c6/flp0/1821     |



|                             |                            |                             |                             |                             |
|-----------------------------|----------------------------|-----------------------------|-----------------------------|-----------------------------|
| R01_cb10609_c3/flp0/695     | NA                         | R01_cb10609_c3/flp0/695     | NA                          | NA                          |
| R01_cb7806_c6/flp0/1731     | NA                         | R01_cb7806_c6/flp0/1731     | R01_cb7806_c6/flp0/1731     | R01_cb7806_c6/flp0/1731     |
| R01_cb8564_c14987/flp0/2611 | NA                         | NA                          | NA                          | R01_cb8564_c14987/flp0/2611 |
| R01_cb17956_c8/flp0/1065    | NA                         | R01_cb17956_c8/flp0/1065    | NA                          | NA                          |
| R01_cb12504_c0/f2p0/938     | NA                         | NA                          | NA                          | R01_cb12504_c0/f2p0/938     |
| R01_cb14235_c2/flp0/478     | R01_cb14235_c2/flp0/478    | R01_cb14235_c2/flp0/478     | NA                          | R01_cb14235_c2/flp0/478     |
| R01_cb5533_c138/flp0/2944   | NA                         | R01_cb5533_c138/flp0/2944   | NA                          | R01_cb5533_c138/flp0/2944   |
| R01_cb10743_c0/flp0/792     | NA                         | R01_cb10743_c0/flp0/792     | R01_cb10743_c0/flp0/792     | NA                          |
| R01_cb545_c4/flp0/2126      | NA                         | R01_cb545_c4/flp0/2126      | NA                          | NA                          |
| R01_cb1779_c1/flp0/4179     | NA                         | NA                          | NA                          | R01_cb1779_c1/flp0/4179     |
| R01_cb17744_c32/flp0/1223   | NA                         | NA                          | NA                          | R01_cb17744_c32/flp0/1223   |
| R01_cb6153_c4/flp0/3039     | NA                         | NA                          | NA                          | R01_cb6153_c4/flp0/3039     |
| R01_cb8564_c4695/flp0/2526  | R01_cb8564_c4695/flp0/2526 | R01_cb8564_c4695/flp0/2526  | NA                          | NA                          |
| R01_cb14675_c2/f3p1/856     | NA                         | R01_cb14675_c2/f3p1/856     | R01_cb14675_c2/f3p1/856     | R01_cb14675_c2/f3p1/856     |
| R01_cb17400_c0/flp0/725     | NA                         | R01_cb17400_c0/flp0/725     | R01_cb17400_c0/flp0/725     | NA                          |
| R01_cb8564_c91308/flp0/3701 | NA                         | R01_cb8564_c91308/flp0/3701 | NA                          | NA                          |
| R01_cb12321_c644/flp0/708   | R01_cb12321_c644/flp0/708  | R01_cb12321_c644/flp0/708   | R01_cb12321_c644/flp0/708   | R01_cb12321_c644/flp0/708   |
| R01_cb8564_c25012/flp1/2631 | NA                         | NA                          | NA                          | R01_cb8564_c25012/flp1/2631 |
| R01_cb6090_c10/flp0/2595    | NA                         | NA                          | NA                          | R01_cb6090_c10/flp0/2595    |
| R01_cb9353_c8/flp0/557      | R01_cb9353_c8/flp0/557     | R01_cb9353_c8/flp0/557      | NA                          | NA                          |
| R01_cb18456_c7103/flp1/1164 | NA                         | R01_cb18456_c7103/flp1/1164 | R01_cb18456_c7103/flp1/1164 | R01_cb18456_c7103/flp1/1164 |
| R01_cb14721_c1/flp0/395     | R01_cb14721_c1/flp0/395    | R01_cb14721_c1/flp0/395     | R01_cb14721_c1/flp0/395     | R01_cb14721_c1/flp0/395     |
| R01_cb2293_c23/flp0/354     | R01_cb2293_c23/flp0/354    | R01_cb2293_c23/flp0/354     | R01_cb2293_c23/flp0/354     | R01_cb2293_c23/flp0/354     |
| R01_cb7032_c1/flp0/1901     | NA                         | R01_cb7032_c1/flp0/1901     | NA                          | NA                          |
| R01_cb4637_c3/flp0/3297     | R01_cb4637_c3/flp0/3297    | NA                          | NA                          | NA                          |
| R01_cb18467_c0/f2p0/1134    | NA                         | R01_cb18467_c0/f2p0/1134    | NA                          | R01_cb18467_c0/f2p0/1134    |

|                              |                             |                              |                             |                             |
|------------------------------|-----------------------------|------------------------------|-----------------------------|-----------------------------|
| R01_cb1224_c13/flp1/3758     | NA                          | NA                           | NA                          | R01_cb1224_c13/flp1/3758    |
| R01_cb8564_c77903/flp1/4534  | NA                          | R01_cb8564_c77903/flp1/4534  | NA                          | NA                          |
| R01_cb357_c1/flp2/4848       | NA                          | NA                           | NA                          | R01_cb357_c1/flp2/4848      |
| R01_cb18456_c2499/flp0/1363  | NA                          | R01_cb18456_c2499/flp0/1363  | NA                          | R01_cb18456_c2499/flp0/1363 |
| R01_cb1993_c1/f2p0/3051      | NA                          | NA                           | NA                          | R01_cb1993_c1/f2p0/3051     |
| R01_cb13910_c5/flp0/1513     | NA                          | R01_cb13910_c5/flp0/1513     | R01_cb13910_c5/flp0/1513    | R01_cb13910_c5/flp0/1513    |
| R01_cb5893_c2/flp0/2002      | NA                          | R01_cb5893_c2/flp0/2002      | R01_cb5893_c2/flp0/2002     | R01_cb5893_c2/flp0/2002     |
| R01_cb8216_c2/flp0/2427      | NA                          | R01_cb8216_c2/flp0/2427      | NA                          | NA                          |
| R01_cb4208_c7/flp0/2028      | NA                          | R01_cb4208_c7/flp0/2028      | NA                          | NA                          |
| R01_cb18456_c3392/flp6/758   | NA                          | R01_cb18456_c3392/flp6/758   | NA                          | NA                          |
| R01_cb8564_c151357/flp3/2495 | NA                          | R01_cb8564_c151357/flp3/2495 | NA                          | NA                          |
| R01_cb10457_c4/flp0/1087     | R01_cb10457_c4/flp0/1087    | R01_cb10457_c4/flp0/1087     | R01_cb10457_c4/flp0/1087    | R01_cb10457_c4/flp0/1087    |
| R01_cb16125_c4/flp0/1477     | NA                          | R01_cb16125_c4/flp0/1477     | NA                          | NA                          |
| R01_cb8564_c75384/flp1/3644  | NA                          | NA                           | NA                          | R01_cb8564_c75384/flp1/3644 |
| R01_cb763_c3/flp0/3898       | NA                          | R01_cb763_c3/flp0/3898       | R01_cb763_c3/flp0/3898      | R01_cb763_c3/flp0/3898      |
| R01_cb18334_c1/flp0/1740     | NA                          | NA                           | NA                          | R01_cb18334_c1/flp0/1740    |
| R01_cb15928_c0/f4p0/873      | NA                          | NA                           | NA                          | R01_cb15928_c0/f4p0/873     |
| R01_cb9351_c2/flp0/1990      | NA                          | R01_cb9351_c2/flp0/1990      | R01_cb9351_c2/flp0/1990     | NA                          |
| R01_cb8564_c12541/flp0/3791  | R01_cb8564_c12541/flp0/3791 | R01_cb8564_c12541/flp0/3791  | R01_cb8564_c12541/flp0/3791 | R01_cb8564_c12541/flp0/3791 |
| R01_cb16867_c2/flp0/1415     | NA                          | NA                           | NA                          | R01_cb16867_c2/flp0/1415    |
| R01_cb11530_c3/flp0/938      | NA                          | R01_cb11530_c3/flp0/938      | NA                          | NA                          |
| R01_cb8564_c3057/flp0/2651   | NA                          | R01_cb8564_c3057/flp0/2651   | R01_cb8564_c3057/flp0/2651  | R01_cb8564_c3057/flp0/2651  |
| R01_cb17861_c1/flp1/1418     | NA                          | NA                           | NA                          | R01_cb17861_c1/flp1/1418    |
| R01_cb13696_c0/f2p0/1445     | NA                          | NA                           | NA                          | R01_cb13696_c0/f2p0/1445    |

|                             |                          |                          |                          |                             |
|-----------------------------|--------------------------|--------------------------|--------------------------|-----------------------------|
| R01_cb124_c47/f1p0/3771     | NA                       | NA                       | NA                       | R01_cb124_c47/f1p0/3771     |
| R01_cb14334_c6/f3p0/859     | NA                       | NA                       | NA                       | R01_cb14334_c6/f3p0/859     |
| R01_cb8564_c17427/f1p0/2705 | NA                       | NA                       | NA                       | R01_cb8564_c17427/f1p0/2705 |
| R01_cb2843_c12/f1p0/2967    | NA                       | NA                       | NA                       | R01_cb2843_c12/f1p0/2967    |
| R01_cb18669_c1/f1p0/1087    | R01_cb18669_c1/f1p0/1087 | R01_cb18669_c1/f1p0/1087 | R01_cb18669_c1/f1p0/1087 | R01_cb18669_c1/f1p0/1087    |
| R01_cb13778_c0/f1p0/1159    | NA                       | NA                       | R01_cb13778_c0/f1p0/1159 | NA                          |
| R01_cb17231_c2/f1p0/743     | NA                       | NA                       | NA                       | R01_cb17231_c2/f1p0/743     |
| R01_cb8564_c3270/f1p0/4948  | NA                       | NA                       | NA                       | R01_cb8564_c3270/f1p0/4948  |
| R01_cb18692_c0/f1p0/5018    | NA                       | R01_cb18692_c0/f1p0/5018 | NA                       | NA                          |
| R01_cb10819_c2/f1p0/1448    | NA                       | R01_cb10819_c2/f1p0/1448 | NA                       | R01_cb10819_c2/f1p0/1448    |
| R01_cb7740_c0/f1p0/2542     | NA                       | R01_cb7740_c0/f1p0/2542  | R01_cb7740_c0/f1p0/2542  | R01_cb7740_c0/f1p0/2542     |
| R01_cb11698_c1/f1p0/3856    | NA                       | NA                       | NA                       | R01_cb11698_c1/f1p0/3856    |
| R01_cb17418_c0/f2p0/1610    | NA                       | NA                       | NA                       | R01_cb17418_c0/f2p0/1610    |
| R01_cb3610_c1/f1p0/2101     | NA                       | R01_cb3610_c1/f1p0/2101  | NA                       | NA                          |
| R01_cb14620_c0/f2p0/1771    | NA                       | NA                       | R01_cb14620_c0/f2p0/1771 | R01_cb14620_c0/f2p0/1771    |
| R01_cb12636_c0/f8p0/1482    | NA                       | NA                       | NA                       | R01_cb12636_c0/f8p0/1482    |
| R01_cb3310_c9/f1p0/679      | R01_cb3310_c9/f1p0/679   | R01_cb3310_c9/f1p0/679   | R01_cb3310_c9/f1p0/679   | R01_cb3310_c9/f1p0/679      |
| R01_cb5900_c47/f1p0/1949    | NA                       | R01_cb5900_c47/f1p0/1949 | NA                       | R01_cb5900_c47/f1p0/1949    |
| R01_cb3797_c3/f1p0/3023     | NA                       | NA                       | NA                       | R01_cb3797_c3/f1p0/3023     |
| R01_cb12174_c1/f1p0/615     | NA                       | R01_cb12174_c1/f1p0/615  | NA                       | R01_cb12174_c1/f1p0/615     |
| R01_cb17037_c2/f1p0/1366    | R01_cb17037_c2/f1p0/1366 | R01_cb17037_c2/f1p0/1366 | NA                       | NA                          |
| R01_cb15753_c0/f1p0/1582    | NA                       | R01_cb15753_c0/f1p0/1582 | NA                       | NA                          |
| R01_cb14942_c2/f1p0/860     | NA                       | NA                       | NA                       | R01_cb14942_c2/f1p0/860     |
| R01_cb9402_c1/f1p0/2289     | R01_cb9402_c1/f1p0/2289  | R01_cb9402_c1/f1p0/2289  | R01_cb9402_c1/f1p0/2289  | R01_cb9402_c1/f1p0/2289     |
| R01_cb119_c32/f1p0/2471     | NA                       | NA                       | NA                       | R01_cb119_c32/f1p0/2471     |
| R01_cb10517_c2/f1p0/434     | NA                       | R01_cb10517_c2/f1p0/434  | NA                       | NA                          |

|                             |                             |                             |                             |                             |
|-----------------------------|-----------------------------|-----------------------------|-----------------------------|-----------------------------|
| R01_cb4846_c11/flp0/1842    | NA                          | R01_cb4846_c11/flp0/1842    | NA                          | NA                          |
| R01_cb13260_c2/flp0/730     | NA                          | NA                          | NA                          | R01_cb13260_c2/flp0/730     |
| R01_cb8564_c70908/flp0/2481 | NA                          | NA                          | NA                          | R01_cb8564_c70908/flp0/2481 |
| R01_cb8564_c50883/flp0/3589 | R01_cb8564_c50883/flp0/3589 | R01_cb8564_c50883/flp0/3589 | NA                          | R01_cb8564_c50883/flp0/3589 |
| R01_cb5647_c3/flp0/3223     | NA                          | NA                          | NA                          | R01_cb5647_c3/flp0/3223     |
| R01_cb8564_c84119/flp0/4188 | NA                          | NA                          | NA                          | R01_cb8564_c84119/flp0/4188 |
| R01_cb18456_c7352/flp0/586  | R01_cb18456_c7352/flp0/586  | R01_cb18456_c7352/flp0/586  | R01_cb18456_c7352/flp0/586  | R01_cb18456_c7352/flp0/586  |
| R01_cb8564_c82142/flp0/3467 | R01_cb8564_c82142/flp0/3467 | R01_cb8564_c82142/flp0/3467 | NA                          | NA                          |
| R01_cb8564_c91504/flp0/2024 | R01_cb8564_c91504/flp0/2024 | R01_cb8564_c91504/flp0/2024 | R01_cb8564_c91504/flp0/2024 | R01_cb8564_c91504/flp0/2024 |
| R01_cb7608_c1/flp0/2572     | NA                          | R01_cb7608_c1/flp0/2572     | NA                          | NA                          |
| R01_cb12782_c3/flp0/908     | NA                          | NA                          | NA                          | R01_cb12782_c3/flp0/908     |
| R01_cb17195_c1/flp0/519     | NA                          | R01_cb17195_c1/flp0/519     | NA                          | NA                          |
| R01_cb3997_c3/flp0/2106     | NA                          | NA                          | NA                          | R01_cb3997_c3/flp0/2106     |
| R01_cb3180_c2/flp0/3347     | NA                          | NA                          | NA                          | R01_cb3180_c2/flp0/3347     |
| R01_cb5705_c1/flp0/3027     | NA                          | R01_cb5705_c1/flp0/3027     | R01_cb5705_c1/flp0/3027     | NA                          |
| R01_cb18034_c1/flp0/1550    | NA                          | R01_cb18034_c1/flp0/1550    | NA                          | R01_cb18034_c1/flp0/1550    |
| R01_cb18409_c117/flp0/649   | R01_cb18409_c117/flp0/649   | R01_cb18409_c117/flp0/649   | R01_cb18409_c117/flp0/649   | R01_cb18409_c117/flp0/649   |
| R01_cb15630_c2/flp0/1683    | NA                          | R01_cb15630_c2/flp0/1683    | NA                          | NA                          |
| R01_cb18161_c0/flp0/511     | R01_cb18161_c0/flp0/511     | R01_cb18161_c0/flp0/511     | R01_cb18161_c0/flp0/511     | R01_cb18161_c0/flp0/511     |
| R01_cb13731_c9/flp0/759     | NA                          | R01_cb13731_c9/flp0/759     | NA                          | NA                          |
| R01_cb1331_c43/flp4/1872    | NA                          | R01_cb1331_c43/flp4/1872    | NA                          | NA                          |
| R01_cb10779_c0/f2p0/625     | R01_cb10779_c0/f2p0/625     | R01_cb10779_c0/f2p0/625     | NA                          | NA                          |
| R01_cb18748_c1/flp0/1451    | R01_cb18748_c1/flp0/1451    | R01_cb18748_c1/flp0/1451    | R01_cb18748_c1/flp0/1451    | R01_cb18748_c1/flp0/1451    |

|                                  |                             |                                  |                             |                            |
|----------------------------------|-----------------------------|----------------------------------|-----------------------------|----------------------------|
| R01_cb8564_c129959/flp0/324<br>7 | NA                          | R01_cb8564_c129959/flp0/324<br>7 | NA                          | NA                         |
| R01_cb13093_c7/flp0/583          | NA                          | R01_cb13093_c7/flp0/583          | NA                          | NA                         |
| R01_cb16153_c8/flp0/677          | NA                          | NA                               | R01_cb16153_c8/flp0/677     | R01_cb16153_c8/flp0/677    |
| R01_cb10884_c1/flp0/3843         | NA                          | R01_cb10884_c1/flp0/3843         | NA                          | NA                         |
| R01_cb18456_c5290/flp0/886       | NA                          | R01_cb18456_c5290/flp0/886       | NA                          | R01_cb18456_c5290/flp0/886 |
| R01_cb15844_c2/flp0/842          | R01_cb15844_c2/flp0/842     | R01_cb15844_c2/flp0/842          | R01_cb15844_c2/flp0/842     | R01_cb15844_c2/flp0/842    |
| R01_cb16303_c8/flp0/2780         | NA                          | R01_cb16303_c8/flp0/2780         | NA                          | NA                         |
| R01_cb9856_c1/flp0/1949          | NA                          | R01_cb9856_c1/flp0/1949          | NA                          | NA                         |
| R01_cb16981_c14/flp1/692         | NA                          | NA                               | NA                          | R01_cb16981_c14/flp1/692   |
| R01_cb3026_c8/flp0/1664          | NA                          | R01_cb3026_c8/flp0/1664          | R01_cb3026_c8/flp0/1664     | R01_cb3026_c8/flp0/1664    |
| R01_cb14307_c12/flp0/308         | R01_cb14307_c12/flp0/308    | R01_cb14307_c12/flp0/308         | R01_cb14307_c12/flp0/308    | R01_cb14307_c12/flp0/308   |
| R01_cb8564_c14540/flp0/3382      | R01_cb8564_c14540/flp0/3382 | R01_cb8564_c14540/flp0/3382      | R01_cb8564_c14540/flp0/3382 | NA                         |
| R01_cb6758_c6/flp0/2435          | NA                          | NA                               | NA                          | R01_cb6758_c6/flp0/2435    |
| R01_cb699_c4/flp0/1340           | NA                          | NA                               | NA                          | R01_cb699_c4/flp0/1340     |
| R01_cb16673_c8/flp0/394          | R01_cb16673_c8/flp0/394     | R01_cb16673_c8/flp0/394          | R01_cb16673_c8/flp0/394     | R01_cb16673_c8/flp0/394    |
| R01_cb10272_c10/flp0/2065        | NA                          | NA                               | NA                          | R01_cb10272_c10/flp0/2065  |
| R01_cb15580_c5/flp0/1731         | NA                          | R01_cb15580_c5/flp0/1731         | NA                          | NA                         |
| R01_cb8564_c42401/flp0/3662      | NA                          | R01_cb8564_c42401/flp0/3662      | NA                          | NA                         |
| R01_cb4453_c1/flp0/2779          | NA                          | NA                               | NA                          | R01_cb4453_c1/flp0/2779    |
| R01_cb16732_c2/flp0/563          | NA                          | NA                               | NA                          | R01_cb16732_c2/flp0/563    |
| R01_cb10155_c6/flp0/521          | NA                          | NA                               | NA                          | R01_cb10155_c6/flp0/521    |
| R01_cb1849_c12/flp0/2290         | NA                          | NA                               | NA                          | R01_cb1849_c12/flp0/2290   |
| R01_cb8564_c37851/flp0/2980      | NA                          | R01_cb8564_c37851/flp0/2980      | R01_cb8564_c37851/flp0/2980 | NA                         |
| R01_cb2875_c16/flp0/3132         | NA                          | NA                               | NA                          | R01_cb2875_c16/flp0/3132   |

|                              |                            |                              |                             |                              |
|------------------------------|----------------------------|------------------------------|-----------------------------|------------------------------|
| R01_cb9222_c21/f1p0/2318     | NA                         | R01_cb9222_c21/f1p0/2318     | R01_cb9222_c21/f1p0/2318    | NA                           |
| R01_cb10962_c1/f1p0/1058     | NA                         | R01_cb10962_c1/f1p0/1058     | NA                          | NA                           |
| R01_cb8564_c129693/f1p0/2912 | NA                         | R01_cb8564_c129693/f1p0/2912 | NA                          | R01_cb8564_c129693/f1p0/2912 |
| R01_cb3320_c4/f1p1/3654      | NA                         | R01_cb3320_c4/f1p1/3654      | NA                          | NA                           |
| R01_cb6658_c7/f1p1/1192      | NA                         | NA                           | NA                          | R01_cb6658_c7/f1p1/1192      |
| R01_cb18456_c6264/f1p0/628   | NA                         | R01_cb18456_c6264/f1p0/628   | NA                          | NA                           |
| R01_cb454_c9/f1p0/2795       | NA                         | NA                           | NA                          | R01_cb454_c9/f1p0/2795       |
| R01_cb6152_c1/f2p0/1940      | NA                         | R01_cb6152_c1/f2p0/1940      | NA                          | NA                           |
| R01_cb2788_c4/f1p0/3827      | NA                         | NA                           | NA                          | R01_cb2788_c4/f1p0/3827      |
| R01_cb7303_c14/f1p0/2482     | NA                         | NA                           | NA                          | R01_cb7303_c14/f1p0/2482     |
| R01_cb454_c8/f1p0/2277       | NA                         | NA                           | NA                          | R01_cb454_c8/f1p0/2277       |
| R01_cb16426_c0/f2p0/656      | NA                         | R01_cb16426_c0/f2p0/656      | NA                          | NA                           |
| R01_cb8564_c4055/f1p0/3722   | R01_cb8564_c4055/f1p0/3722 | R01_cb8564_c4055/f1p0/3722   | NA                          | NA                           |
| R01_cb8564_c69349/f2p0/2368  | NA                         | NA                           | R01_cb8564_c69349/f2p0/2368 | R01_cb8564_c69349/f2p0/2368  |
| R01_cb1666_c3/f1p1/4226      | NA                         | NA                           | NA                          | R01_cb1666_c3/f1p1/4226      |
| R01_cb4830_c21/f1p0/2564     | NA                         | R01_cb4830_c21/f1p0/2564     | NA                          | NA                           |
| R01_cb16638_c5/f1p0/529      | NA                         | R01_cb16638_c5/f1p0/529      | NA                          | NA                           |
| R01_cb2884_c5/f1p0/3541      | NA                         | NA                           | NA                          | R01_cb2884_c5/f1p0/3541      |
| R01_cb3307_c25/f1p0/2537     | NA                         | NA                           | NA                          | R01_cb3307_c25/f1p0/2537     |
| R01_cb10192_c1/f3p0/1351     | NA                         | NA                           | NA                          | R01_cb10192_c1/f3p0/1351     |
| R01_cb5197_c6/f1p0/3323      | NA                         | R01_cb5197_c6/f1p0/3323      | NA                          | NA                           |
| R01_cb3307_c27/f1p0/3461     | NA                         | NA                           | NA                          | R01_cb3307_c27/f1p0/3461     |
| R01_cb13249_c0/f8p1/1086     | NA                         | NA                           | NA                          | R01_cb13249_c0/f8p1/1086     |
| R01_cb8957_c4/f1p0/1084      | NA                         | NA                           | NA                          | R01_cb8957_c4/f1p0/1084      |
| R01_cb9260_c1/f1p0/2138      | NA                         | NA                           | NA                          | R01_cb9260_c1/f1p0/2138      |

|                              |                             |                             |                             |                              |
|------------------------------|-----------------------------|-----------------------------|-----------------------------|------------------------------|
| R01_cb8564_c71657/flp0/2664  | NA                          | NA                          | NA                          | R01_cb8564_c71657/flp0/2664  |
| R01_cb13626_c0/flp0/477      | NA                          | R01_cb13626_c0/flp0/477     | NA                          | R01_cb13626_c0/flp0/477      |
| R01_cb13161_c19/flp0/534     | R01_cb13161_c19/flp0/534    | R01_cb13161_c19/flp0/534    | NA                          | R01_cb13161_c19/flp0/534     |
| R01_cb8564_c84711/flp0/2095  | NA                          | NA                          | R01_cb8564_c84711/flp0/2095 | R01_cb8564_c84711/flp0/2095  |
| R01_cb10116_c1/flp0/1916     | NA                          | R01_cb10116_c1/flp0/1916    | NA                          | NA                           |
| R01_cb8564_c119258/flp0/2481 | NA                          | NA                          | NA                          | R01_cb8564_c119258/flp0/2481 |
| R01_cb11017_c0/flp0/1566     | NA                          | R01_cb11017_c0/flp0/1566    | NA                          | R01_cb11017_c0/flp0/1566     |
| R01_cb15009_c0/f2p0/776      | NA                          | R01_cb15009_c0/f2p0/776     | NA                          | NA                           |
| R01_cb12480_c11/flp0/535     | R01_cb12480_c11/flp0/535    | R01_cb12480_c11/flp0/535    | R01_cb12480_c11/flp0/535    | NA                           |
| R01_cb8564_c14387/flp0/2648  | NA                          | R01_cb8564_c14387/flp0/2648 | R01_cb8564_c14387/flp0/2648 | R01_cb8564_c14387/flp0/2648  |
| R01_cb8564_c90942/flp0/3161  | R01_cb8564_c90942/flp0/3161 | R01_cb8564_c90942/flp0/3161 | R01_cb8564_c90942/flp0/3161 | R01_cb8564_c90942/flp0/3161  |
| R01_cb8796_c5/flp0/1571      | NA                          | R01_cb8796_c5/flp0/1571     | NA                          | NA                           |
| R01_cb8564_c34749/flp0/4828  | NA                          | NA                          | NA                          | R01_cb8564_c34749/flp0/4828  |
| R01_cb9769_c2/flp0/458       | NA                          | R01_cb9769_c2/flp0/458      | NA                          | R01_cb9769_c2/flp0/458       |
| R01_cb11520_c0/flp0/1560     | NA                          | R01_cb11520_c0/flp0/1560    | NA                          | NA                           |
| R01_cb17973_c42/flp0/551     | NA                          | R01_cb17973_c42/flp0/551    | R01_cb17973_c42/flp0/551    | NA                           |
| R01_cb7502_c5/flp1/2335      | NA                          | NA                          | NA                          | R01_cb7502_c5/flp1/2335      |
| R01_cb15640_c5/flp0/829      | NA                          | R01_cb15640_c5/flp0/829     | NA                          | NA                           |
| R01_cb5896_c152/flp0/1996    | R01_cb5896_c152/flp0/1996   | R01_cb5896_c152/flp0/1996   | R01_cb5896_c152/flp0/1996   | R01_cb5896_c152/flp0/1996    |
| R01_cb1982_c9/flp0/637       | R01_cb1982_c9/flp0/637      | R01_cb1982_c9/flp0/637      | R01_cb1982_c9/flp0/637      | R01_cb1982_c9/flp0/637       |
| R01_cb8564_c70535/flp0/3076  | NA                          | R01_cb8564_c70535/flp0/3076 | NA                          | NA                           |
| R01_cb3131_c2/flp0/2835      | NA                          | R01_cb3131_c2/flp0/2835     | NA                          | NA                           |
| R01_cb3120_c48/flp1/2486     | NA                          | R01_cb3120_c48/flp1/2486    | NA                          | NA                           |
| R01_cb6631_c35/fl3p1/2152    | NA                          | NA                          | NA                          | R01_cb6631_c35/fl3p1/2152    |

|                             |                             |                             |                             |                             |
|-----------------------------|-----------------------------|-----------------------------|-----------------------------|-----------------------------|
| R01_cb8564_c71532/flp0/3010 | NA                          | R01_cb8564_c71532/flp0/3010 | NA                          | NA                          |
| R01_cb13260_c0/f4p0/857     | NA                          | NA                          | NA                          | R01_cb13260_c0/f4p0/857     |
| R01_cb8564_c81333/flp0/2975 | NA                          | NA                          | NA                          | R01_cb8564_c81333/flp0/2975 |
| R01_cb1264_c4/flp0/4092     | NA                          | NA                          | NA                          | R01_cb1264_c4/flp0/4092     |
| R01_cb9472_c2/flp0/1675     | NA                          | NA                          | NA                          | R01_cb9472_c2/flp0/1675     |
| R01_cb18051_c5/flp0/1040    | R01_cb18051_c5/flp0/1040    | R01_cb18051_c5/flp0/1040    | R01_cb18051_c5/flp0/1040    | R01_cb18051_c5/flp0/1040    |
| R01_cb625_c0/f3p1/3209      | NA                          | NA                          | NA                          | R01_cb625_c0/f3p1/3209      |
| R01_cb17765_c1/flp0/1649    | NA                          | R01_cb17765_c1/flp0/1649    | R01_cb17765_c1/flp0/1649    | R01_cb17765_c1/flp0/1649    |
| R01_cb15936_c0/flp0/777     | R01_cb15936_c0/flp0/777     | NA                          | R01_cb15936_c0/flp0/777     | R01_cb15936_c0/flp0/777     |
| R01_cb9759_c3/flp1/1890     | NA                          | NA                          | NA                          | R01_cb9759_c3/flp1/1890     |
| R01_cb18456_c6448/flp0/707  | R01_cb18456_c6448/flp0/707  | NA                          | NA                          | NA                          |
| R01_cb3472_c4/flp0/1815     | NA                          | R01_cb3472_c4/flp0/1815     | NA                          | NA                          |
| R01_cb18059_c0/flp0/1045    | R01_cb18059_c0/flp0/1045    | R01_cb18059_c0/flp0/1045    | R01_cb18059_c0/flp0/1045    | R01_cb18059_c0/flp0/1045    |
| R01_cb635_c11/flp0/3042     | NA                          | R01_cb635_c11/flp0/3042     | NA                          | R01_cb635_c11/flp0/3042     |
| R01_cb17644_c1/flp0/372     | NA                          | NA                          | NA                          | R01_cb17644_c1/flp0/372     |
| R01_cb8222_c1/flp0/550      | R01_cb8222_c1/flp0/550      | R01_cb8222_c1/flp0/550      | R01_cb8222_c1/flp0/550      | R01_cb8222_c1/flp0/550      |
| R01_cb12837_c17/flp7/648    | NA                          | R01_cb12837_c17/flp7/648    | NA                          | NA                          |
| R01_cb9189_c2/f2p0/2107     | NA                          | R01_cb9189_c2/f2p0/2107     | NA                          | NA                          |
| R01_cb2357_c1/f3p1/3937     | NA                          | NA                          | NA                          | R01_cb2357_c1/f3p1/3937     |
| R01_cb18456_c5442/flp0/379  | R01_cb18456_c5442/flp0/379  | R01_cb18456_c5442/flp0/379  | R01_cb18456_c5442/flp0/379  | R01_cb18456_c5442/flp0/379  |
| R01_cb8564_c41306/flp0/3967 | NA                          | R01_cb8564_c41306/flp0/3967 | R01_cb8564_c41306/flp0/3967 | R01_cb8564_c41306/flp0/3967 |
| R01_cb8825_c3/flp0/2143     | NA                          | R01_cb8825_c3/flp0/2143     | NA                          | NA                          |
| R01_cb8564_c78049/flp0/2173 | R01_cb8564_c78049/flp0/2173 | R01_cb8564_c78049/flp0/2173 | R01_cb8564_c78049/flp0/2173 | R01_cb8564_c78049/flp0/2173 |
| R01_cb8564_c74917/flp1/2870 | NA                          | R01_cb8564_c74917/flp1/2870 | NA                          | R01_cb8564_c74917/flp1/2870 |
| R01_cb8564_c91256/flp0/3296 | R01_cb8564_c91256/flp0/3296 | R01_cb8564_c91256/flp0/3296 | R01_cb8564_c91256/flp0/3296 | R01_cb8564_c91256/flp0/3296 |



|                             |                          |                             |                             |                             |
|-----------------------------|--------------------------|-----------------------------|-----------------------------|-----------------------------|
|                             | 6                        |                             |                             |                             |
| R01_cb12314_c9/f4p1/532     | NA                       | NA                          | R01_cb12314_c9/f4p1/532     | NA                          |
| R01_cb4342_c2/f1p0/3243     | NA                       | R01_cb4342_c2/f1p0/3243     | NA                          | NA                          |
| R01_cb15457_c7/f1p0/1214    | NA                       | R01_cb15457_c7/f1p0/1214    | NA                          | R01_cb15457_c7/f1p0/1214    |
| R01_cb5151_c0/f1p0/3168     | NA                       | NA                          | NA                          | R01_cb5151_c0/f1p0/3168     |
| R01_cb1138_c5/f5p3/860      | R01_cb1138_c5/f5p3/860   | NA                          | NA                          | R01_cb1138_c5/f5p3/860      |
| R01_cb6990_c4/f1p0/2354     | R01_cb6990_c4/f1p0/2354  | R01_cb6990_c4/f1p0/2354     | NA                          | NA                          |
| R01_cb4469_c2/f1p0/3340     | NA                       | NA                          | NA                          | R01_cb4469_c2/f1p0/3340     |
| R01_cb9974_c3/f1p0/1393     | NA                       | R01_cb9974_c3/f1p0/1393     | NA                          | R01_cb9974_c3/f1p0/1393     |
| R01_cb8564_c111723/f1p0/200 | NA                       | R01_cb8564_c111723/f1p0/200 | R01_cb8564_c111723/f1p0/200 | R01_cb8564_c111723/f1p0/200 |
| 6                           |                          | 6                           | 6                           | 6                           |
| R01_cb14153_c3/f1p0/1306    | R01_cb14153_c3/f1p0/1306 | R01_cb14153_c3/f1p0/1306    | NA                          | NA                          |
| R01_cb16486_c1/f2p0/1075    | NA                       | R01_cb16486_c1/f2p0/1075    | R01_cb16486_c1/f2p0/1075    | R01_cb16486_c1/f2p0/1075    |
| R01_cb416_c25/f1p0/3907     | NA                       | NA                          | NA                          | R01_cb416_c25/f1p0/3907     |
| R01_cb10051_c3/f1p0/946     | NA                       | NA                          | NA                          | R01_cb10051_c3/f1p0/946     |
| R01_cb8564_c14346/f1p4/3686 | NA                       | R01_cb8564_c14346/f1p4/3686 | R01_cb8564_c14346/f1p4/3686 | R01_cb8564_c14346/f1p4/3686 |
| R01_cb1905_c14/f1p0/2728    | NA                       | R01_cb1905_c14/f1p0/2728    | R01_cb1905_c14/f1p0/2728    | NA                          |
| R01_cb2987_c1/f1p0/3748     | NA                       | R01_cb2987_c1/f1p0/3748     | NA                          | NA                          |
| R01_cb16921_c3/f1p0/1790    | NA                       | R01_cb16921_c3/f1p0/1790    | R01_cb16921_c3/f1p0/1790    | R01_cb16921_c3/f1p0/1790    |
| R01_cb13583_c8/f1p0/1422    | NA                       | NA                          | NA                          | R01_cb13583_c8/f1p0/1422    |
| R01_cb4765_c3/f1p0/3221     | R01_cb4765_c3/f1p0/3221  | R01_cb4765_c3/f1p0/3221     | R01_cb4765_c3/f1p0/3221     | R01_cb4765_c3/f1p0/3221     |
| R01_cb4340_c1/f1p0/3432     | NA                       | NA                          | R01_cb4340_c1/f1p0/3432     | R01_cb4340_c1/f1p0/3432     |
| R01_cb8564_c121914/f1p0/267 | NA                       | R01_cb8564_c121914/f1p0/267 | NA                          | NA                          |
| 1                           |                          | 1                           |                             |                             |
| R01_cb12827_c4/f1p1/1489    | NA                       | NA                          | NA                          | R01_cb12827_c4/f1p1/1489    |
| R01_cb13315_c0/f2p0/904     | NA                       | R01_cb13315_c0/f2p0/904     | NA                          | NA                          |

|                             |                          |                             |                             |                             |
|-----------------------------|--------------------------|-----------------------------|-----------------------------|-----------------------------|
| R01_cb13808_c1/flp0/743     | NA                       | R01_cb13808_c1/flp0/743     | NA                          | R01_cb13808_c1/flp0/743     |
| R01_cb191_c13/flp0/525      | NA                       | R01_cb191_c13/flp0/525      | R01_cb191_c13/flp0/525      | R01_cb191_c13/flp0/525      |
| R01_cb10920_c11/flp0/1457   | NA                       | R01_cb10920_c11/flp0/1457   | NA                          | NA                          |
| R01_cb15995_c1/f2p0/760     | NA                       | NA                          | NA                          | R01_cb15995_c1/f2p0/760     |
| R01_cb5304_c3/flp0/2687     | NA                       | NA                          | NA                          | R01_cb5304_c3/flp0/2687     |
| R01_cb8564_c25142/flp1/4429 | NA                       | R01_cb8564_c25142/flp1/4429 | R01_cb8564_c25142/flp1/4429 | R01_cb8564_c25142/flp1/4429 |
| R01_cb5513_c1/flp0/3071     | NA                       | NA                          | NA                          | R01_cb5513_c1/flp0/3071     |
| R01_cb11869_c7/flp0/580     | NA                       | R01_cb11869_c7/flp0/580     | NA                          | NA                          |
| R01_cb8564_c78882/flp0/2391 | NA                       | NA                          | NA                          | R01_cb8564_c78882/flp0/2391 |
| R01_cb8564_c78578/flp0/3318 | NA                       | NA                          | NA                          | R01_cb8564_c78578/flp0/3318 |
| R01_cb8159_c1/flp0/2391     | NA                       | R01_cb8159_c1/flp0/2391     | NA                          | NA                          |
| R01_cb3516_c3/flp0/2828     | NA                       | R01_cb3516_c3/flp0/2828     | NA                          | R01_cb3516_c3/flp0/2828     |
| R01_cb8564_c39130/f3p0/2526 | NA                       | R01_cb8564_c39130/f3p0/2526 | NA                          | R01_cb8564_c39130/f3p0/2526 |
| R01_cb8564_c22901/flp0/3801 | NA                       | R01_cb8564_c22901/flp0/3801 | NA                          | NA                          |
| R01_cb763_c8/flp0/1321      | NA                       | R01_cb763_c8/flp0/1321      | R01_cb763_c8/flp0/1321      | R01_cb763_c8/flp0/1321      |
| R01_cb3464_c8/flp0/1553     | NA                       | NA                          | NA                          | R01_cb3464_c8/flp0/1553     |
| R01_cb8564_c38512/flp0/3619 | NA                       | NA                          | R01_cb8564_c38512/flp0/3619 | R01_cb8564_c38512/flp0/3619 |
| R01_cb288_c11/flp0/1164     | NA                       | NA                          | NA                          | R01_cb288_c11/flp0/1164     |
| R01_cb5608_c48/flp0/2689    | NA                       | R01_cb5608_c48/flp0/2689    | R01_cb5608_c48/flp0/2689    | R01_cb5608_c48/flp0/2689    |
| R01_cb8564_c4631/flp0/3294  | NA                       | R01_cb8564_c4631/flp0/3294  | R01_cb8564_c4631/flp0/3294  | R01_cb8564_c4631/flp0/3294  |
| R01_cb10793_c1/flp0/2837    | R01_cb10793_c1/flp0/2837 | R01_cb10793_c1/flp0/2837    | NA                          | NA                          |
| R01_cb8564_c3038/flp0/2664  | NA                       | R01_cb8564_c3038/flp0/2664  | NA                          | NA                          |
| R01_cb9252_c4/flp0/682      | R01_cb9252_c4/flp0/682   | R01_cb9252_c4/flp0/682      | R01_cb9252_c4/flp0/682      | R01_cb9252_c4/flp0/682      |
| R01_cb8564_c117283/flp0/294 | NA                       | NA                          | R01_cb8564_c117283/flp0/294 | NA                          |
| 1                           |                          |                             | 1                           |                             |
| R01_cb17659_c1/flp1/1464    | NA                       | NA                          | NA                          | R01_cb17659_c1/flp1/1464    |

|                              |                              |                              |                              |                              |
|------------------------------|------------------------------|------------------------------|------------------------------|------------------------------|
| R01_cb8276_c6/flp1/3242      | NA                           | R01_cb8276_c6/flp1/3242      | NA                           | NA                           |
| R01_cb13771_c7/flp0/1009     | NA                           | R01_cb13771_c7/flp0/1009     | R01_cb13771_c7/flp0/1009     | R01_cb13771_c7/flp0/1009     |
| R01_cb4536_c5/flp0/1031      | NA                           | NA                           | NA                           | R01_cb4536_c5/flp0/1031      |
| R01_cb14261_c0/flp0/662      | R01_cb14261_c0/flp0/662      | R01_cb14261_c0/flp0/662      | R01_cb14261_c0/flp0/662      | R01_cb14261_c0/flp0/662      |
| R01_cb11408_c2/flp1/2605     | NA                           | R01_cb11408_c2/flp1/2605     | NA                           | NA                           |
| R01_cb2445_c3/f3p0/3409      | NA                           | NA                           | NA                           | R01_cb2445_c3/f3p0/3409      |
| R01_cb8564_c116509/flp0/3009 | NA                           | NA                           | NA                           | R01_cb8564_c116509/flp0/3009 |
| R01_cb8564_c15922/flp0/2749  | NA                           | NA                           | NA                           | R01_cb8564_c15922/flp0/2749  |
| R01_cb17202_c0/flp0/346      | R01_cb17202_c0/flp0/346      | R01_cb17202_c0/flp0/346      | R01_cb17202_c0/flp0/346      | R01_cb17202_c0/flp0/346      |
| R01_cb14911_c2/flp0/770      | NA                           | NA                           | NA                           | R01_cb14911_c2/flp0/770      |
| R01_cb8564_c113904/flp0/2973 | R01_cb8564_c113904/flp0/2973 | R01_cb8564_c113904/flp0/2973 | R01_cb8564_c113904/flp0/2973 | R01_cb8564_c113904/flp0/2973 |
| R01_cb10425_c2/flp1/2683     | NA                           | NA                           | R01_cb10425_c2/flp1/2683     | R01_cb10425_c2/flp1/2683     |
| R01_cb13012_c0/f3p0/1080     | NA                           | NA                           | NA                           | R01_cb13012_c0/f3p0/1080     |
| R01_cb7182_c18/flp0/3116     | NA                           | R01_cb7182_c18/flp0/3116     | NA                           | NA                           |
| R01_cb16125_c8/flp0/1802     | NA                           | R01_cb16125_c8/flp0/1802     | NA                           | NA                           |
| R01_cb8564_c76302/flp0/4652  | NA                           | R01_cb8564_c76302/flp0/4652  | NA                           | NA                           |
| R01_cb8564_c1722/flp0/2580   | NA                           | R01_cb8564_c1722/flp0/2580   | NA                           | NA                           |
| R01_cb665_c6/flp0/2146       | NA                           | NA                           | NA                           | R01_cb665_c6/flp0/2146       |
| R01_cb8162_c0/flp0/2440      | NA                           | R01_cb8162_c0/flp0/2440      | R01_cb8162_c0/flp0/2440      | R01_cb8162_c0/flp0/2440      |
| R01_cb2568_c7/flp0/1765      | R01_cb2568_c7/flp0/1765      | R01_cb2568_c7/flp0/1765      | R01_cb2568_c7/flp0/1765      | NA                           |
| R01_cb10566_c1/f2p0/1407     | NA                           | NA                           | NA                           | R01_cb10566_c1/f2p0/1407     |
| R01_cb2925_c3/flp0/3108      | NA                           | R01_cb2925_c3/flp0/3108      | NA                           | NA                           |
| R01_cb8564_c75872/flp0/2250  | NA                           | R01_cb8564_c75872/flp0/2250  | R01_cb8564_c75872/flp0/2250  | R01_cb8564_c75872/flp0/2250  |
| R01_cb18426_c0/flp0/1802     | R01_cb18426_c0/flp0/1802     | R01_cb18426_c0/flp0/1802     | R01_cb18426_c0/flp0/1802     | R01_cb18426_c0/flp0/1802     |

|                              |                            |                            |                            |                              |
|------------------------------|----------------------------|----------------------------|----------------------------|------------------------------|
| R01_cb6591_c4/f3p0/632       | R01_cb6591_c4/f3p0/632     | R01_cb6591_c4/f3p0/632     | NA                         | NA                           |
| R01_cb11533_c1/flp0/3865     | R01_cb11533_c1/flp0/3865   | R01_cb11533_c1/flp0/3865   | R01_cb11533_c1/flp0/3865   | R01_cb11533_c1/flp0/3865     |
| R01_cb10865_c0/flp0/1516     | NA                         | NA                         | NA                         | R01_cb10865_c0/flp0/1516     |
| R01_cb5681_c0/flp0/3039      | NA                         | R01_cb5681_c0/flp0/3039    | NA                         | R01_cb5681_c0/flp0/3039      |
| R01_cb10905_c12/flp0/996     | NA                         | R01_cb10905_c12/flp0/996   | NA                         | R01_cb10905_c12/flp0/996     |
| R01_cb12038_c29/flp2/1808    | NA                         | R01_cb12038_c29/flp2/1808  | NA                         | NA                           |
| R01_cb18456_c5739/flp0/853   | NA                         | R01_cb18456_c5739/flp0/853 | NA                         | NA                           |
| R01_cb18456_c7197/flp0/561   | R01_cb18456_c7197/flp0/561 | R01_cb18456_c7197/flp0/561 | R01_cb18456_c7197/flp0/561 | R01_cb18456_c7197/flp0/561   |
| R01_cb8564_c129337/flp0/2511 | NA                         | NA                         | NA                         | R01_cb8564_c129337/flp0/2511 |
| R01_cb18059_c1/flp0/534      | R01_cb18059_c1/flp0/534    | R01_cb18059_c1/flp0/534    | R01_cb18059_c1/flp0/534    | R01_cb18059_c1/flp0/534      |
| R01_cb2198_c4/flp0/1321      | NA                         | NA                         | R01_cb2198_c4/flp0/1321    | R01_cb2198_c4/flp0/1321      |
| R01_cb8564_c1985/flp0/3118   | NA                         | R01_cb8564_c1985/flp0/3118 | R01_cb8564_c1985/flp0/3118 | R01_cb8564_c1985/flp0/3118   |
| R01_cb1666_c5/flp3/2503      | NA                         | NA                         | NA                         | R01_cb1666_c5/flp3/2503      |
| R01_cb8475_c3/flp0/3491      | NA                         | R01_cb8475_c3/flp0/3491    | NA                         | NA                           |
| R01_cb13888_c0/f5p0/619      | R01_cb13888_c0/f5p0/619    | R01_cb13888_c0/f5p0/619    | R01_cb13888_c0/f5p0/619    | R01_cb13888_c0/f5p0/619      |
| R01_cb2042_c2/flp0/2780      | NA                         | NA                         | NA                         | R01_cb2042_c2/flp0/2780      |
| R01_cb5659_c68/flp0/2200     | NA                         | NA                         | NA                         | R01_cb5659_c68/flp0/2200     |
| R01_cb9448_c15/flp0/1430     | NA                         | NA                         | NA                         | R01_cb9448_c15/flp0/1430     |
| R01_cb2985_c2/f4p2/3365      | NA                         | NA                         | NA                         | R01_cb2985_c2/f4p2/3365      |
| R01_cb15683_c6/flp0/1620     | NA                         | NA                         | NA                         | R01_cb15683_c6/flp0/1620     |
| R01_cb5635_c4/flp0/793       | NA                         | NA                         | NA                         | R01_cb5635_c4/flp0/793       |
| R01_cb11102_c0/f2p0/905      | NA                         | NA                         | NA                         | R01_cb11102_c0/f2p0/905      |
| R01_cb12437_c1/flp0/459      | R01_cb12437_c1/flp0/459    | R01_cb12437_c1/flp0/459    | R01_cb12437_c1/flp0/459    | R01_cb12437_c1/flp0/459      |
| R01_cb12098_c38/flp0/833     | R01_cb12098_c38/flp0/833   | R01_cb12098_c38/flp0/833   | R01_cb12098_c38/flp0/833   | R01_cb12098_c38/flp0/833     |
| R01_cb16459_c0/flp0/1377     | R01_cb16459_c0/flp0/1377   | R01_cb16459_c0/flp0/1377   | R01_cb16459_c0/flp0/1377   | NA                           |

|                             |                          |                             |                             |                             |
|-----------------------------|--------------------------|-----------------------------|-----------------------------|-----------------------------|
| R01_cb14085_c1/flp0/652     | NA                       | R01_cb14085_c1/flp0/652     | NA                          | NA                          |
| R01_cb13275_c1/flp0/418     | R01_cb13275_c1/flp0/418  | R01_cb13275_c1/flp0/418     | NA                          | NA                          |
| R01_cb4169_c4/flp0/3340     | NA                       | NA                          | NA                          | R01_cb4169_c4/flp0/3340     |
| R01_cb11631_c3/flp1/1766    | NA                       | R01_cb11631_c3/flp1/1766    | NA                          | NA                          |
| R01_cb4368_c8/flp1/1542     | NA                       | NA                          | NA                          | R01_cb4368_c8/flp1/1542     |
| R01_cb16024_c5/flp0/577     | R01_cb16024_c5/flp0/577  | NA                          | NA                          | NA                          |
| R01_cb12213_c3/flp1/829     | NA                       | R01_cb12213_c3/flp1/829     | NA                          | NA                          |
| R01_cb1905_c12/flp0/3147    | NA                       | R01_cb1905_c12/flp0/3147    | R01_cb1905_c12/flp0/3147    | NA                          |
| R01_cb7690_c0/flp0/2559     | NA                       | R01_cb7690_c0/flp0/2559     | NA                          | NA                          |
| R01_cb15122_c0/f3p0/881     | NA                       | R01_cb15122_c0/f3p0/881     | NA                          | NA                          |
| R01_cb13019_c0/fl1p2/632    | NA                       | NA                          | R01_cb13019_c0/fl1p2/632    | NA                          |
| R01_cb8564_c3686/flp0/3543  | NA                       | R01_cb8564_c3686/flp0/3543  | NA                          | NA                          |
| R01_cb10015_c162/flp0/575   | NA                       | R01_cb10015_c162/flp0/575   | R01_cb10015_c162/flp0/575   | NA                          |
| R01_cb12743_c5/flp0/703     | NA                       | R01_cb12743_c5/flp0/703     | NA                          | R01_cb12743_c5/flp0/703     |
| R01_cb5808_c3/flp0/2793     | NA                       | NA                          | NA                          | R01_cb5808_c3/flp0/2793     |
| R01_cb2836_c9/flp0/2465     | NA                       | NA                          | NA                          | R01_cb2836_c9/flp0/2465     |
| R01_cb12938_c7/flp0/483     | R01_cb12938_c7/flp0/483  | R01_cb12938_c7/flp0/483     | R01_cb12938_c7/flp0/483     | R01_cb12938_c7/flp0/483     |
| R01_cb15537_c5/flp0/1802    | R01_cb15537_c5/flp0/1802 | R01_cb15537_c5/flp0/1802    | R01_cb15537_c5/flp0/1802    | NA                          |
| R01_cb8564_c17323/flp0/2493 | NA                       | R01_cb8564_c17323/flp0/2493 | R01_cb8564_c17323/flp0/2493 | R01_cb8564_c17323/flp0/2493 |
| R01_cb10386_c1/flp0/2111    | R01_cb10386_c1/flp0/2111 | R01_cb10386_c1/flp0/2111    | R01_cb10386_c1/flp0/2111    | R01_cb10386_c1/flp0/2111    |
| R01_cb6615_c23/flp0/1004    | NA                       | NA                          | NA                          | R01_cb6615_c23/flp0/1004    |
| R01_cb136_c2/flp0/1762      | NA                       | R01_cb136_c2/flp0/1762      | NA                          | NA                          |
| R01_cb2637_c11/flp0/2585    | NA                       | R01_cb2637_c11/flp0/2585    | NA                          | NA                          |
| R01_cb8564_c74050/flp1/3406 | NA                       | NA                          | NA                          | R01_cb8564_c74050/flp1/3406 |
| R01_cb6153_c2/flp0/2933     | NA                       | NA                          | NA                          | R01_cb6153_c2/flp0/2933     |
| R01_cb3874_c0/flp0/3504     | R01_cb3874_c0/flp0/3504  | R01_cb3874_c0/flp0/3504     | R01_cb3874_c0/flp0/3504     | R01_cb3874_c0/flp0/3504     |

|                              |                              |                              |                            |                             |
|------------------------------|------------------------------|------------------------------|----------------------------|-----------------------------|
| R01_cb8040_c22/flp0/1484     | NA                           | R01_cb8040_c22/flp0/1484     | R01_cb8040_c22/flp0/1484   | NA                          |
| R01_cb17266_c23/flp0/1582    | R01_cb17266_c23/flp0/1582    | R01_cb17266_c23/flp0/1582    | NA                         | R01_cb17266_c23/flp0/1582   |
| R01_cb8564_c47229/flp0/2561  | NA                           | R01_cb8564_c47229/flp0/2561  | NA                         | R01_cb8564_c47229/flp0/2561 |
| R01_cb9130_c3/flp0/827       | NA                           | R01_cb9130_c3/flp0/827       | NA                         | NA                          |
| R01_cb4490_c16/flp0/2383     | NA                           | NA                           | NA                         | R01_cb4490_c16/flp0/2383    |
| R01_cb7686_c1/flp0/2418      | NA                           | NA                           | NA                         | R01_cb7686_c1/flp0/2418     |
| R01_cb5579_c3/flp0/2378      | NA                           | NA                           | NA                         | R01_cb5579_c3/flp0/2378     |
| R01_cb8564_c88855/flp0/2600  | NA                           | NA                           | NA                         | R01_cb8564_c88855/flp0/2600 |
| R01_cb7960_c26/flp0/1559     | R01_cb7960_c26/flp0/1559     | R01_cb7960_c26/flp0/1559     | R01_cb7960_c26/flp0/1559   | NA                          |
| R01_cb16504_c2/flp0/1676     | NA                           | NA                           | NA                         | R01_cb16504_c2/flp0/1676    |
| R01_cb8441_c4/flp0/2369      | NA                           | NA                           | NA                         | R01_cb8441_c4/flp0/2369     |
| R01_cb2847_c1/flp0/2017      | NA                           | R01_cb2847_c1/flp0/2017      | NA                         | NA                          |
| R01_cb10586_c3/flp0/1736     | NA                           | NA                           | NA                         | R01_cb10586_c3/flp0/1736    |
| R01_cb14125_c97/f2p0/690     | NA                           | R01_cb14125_c97/f2p0/690     | R01_cb14125_c97/f2p0/690   | NA                          |
| R01_cb8564_c128965/flp0/2370 | NA                           | R01_cb8564_c128965/flp0/2370 | NA                         | NA                          |
| R01_cb8564_c3946/flp0/3184   | R01_cb8564_c3946/flp0/3184   | R01_cb8564_c3946/flp0/3184   | R01_cb8564_c3946/flp0/3184 | R01_cb8564_c3946/flp0/3184  |
| R01_cb7114_c9/flp0/1792      | NA                           | NA                           | NA                         | R01_cb7114_c9/flp0/1792     |
| R01_cb18456_c3327/flp0/1071  | NA                           | R01_cb18456_c3327/flp0/1071  | NA                         | NA                          |
| R01_cb8564_c115544/flp0/2007 | R01_cb8564_c115544/flp0/2007 | R01_cb8564_c115544/flp0/2007 | NA                         | NA                          |
| R01_cb8162_c1/flp0/2330      | NA                           | R01_cb8162_c1/flp0/2330      | NA                         | R01_cb8162_c1/flp0/2330     |
| R01_cb3680_c2/flp0/3549      | NA                           | NA                           | NA                         | R01_cb3680_c2/flp0/3549     |
| R01_cb2425_c6/flp0/2303      | NA                           | NA                           | NA                         | R01_cb2425_c6/flp0/2303     |
| R01_cb14787_c7/flp0/1107     | NA                           | R01_cb14787_c7/flp0/1107     | NA                         | NA                          |
| R01_cb18005_c0/f6p0/707      | NA                           | NA                           | NA                         | R01_cb18005_c0/f6p0/707     |

|                              |                             |                              |                             |                             |
|------------------------------|-----------------------------|------------------------------|-----------------------------|-----------------------------|
| R01_cb3154_c2/flp0/3704      | NA                          | R01_cb3154_c2/flp0/3704      | NA                          | NA                          |
| R01_cb16809_c2/flp0/501      | NA                          | R01_cb16809_c2/flp0/501      | NA                          | NA                          |
| R01_cb15578_c6/flp0/621      | NA                          | R01_cb15578_c6/flp0/621      | NA                          | R01_cb15578_c6/flp0/621     |
| R01_cb11477_c0/flp0/1212     | NA                          | R01_cb11477_c0/flp0/1212     | NA                          | NA                          |
| R01_cb15273_c3/f2p0/1239     | NA                          | NA                           | NA                          | R01_cb15273_c3/f2p0/1239    |
| R01_cb15949_c0/f2p1/1029     | NA                          | NA                           | NA                          | R01_cb15949_c0/f2p1/1029    |
| R01_cb2773_c9/flp0/2545      | R01_cb2773_c9/flp0/2545     | R01_cb2773_c9/flp0/2545      | NA                          | NA                          |
| R01_cb14493_c6/flp0/1013     | NA                          | R01_cb14493_c6/flp0/1013     | R01_cb14493_c6/flp0/1013    | R01_cb14493_c6/flp0/1013    |
| R01_cb18456_c5441/flp2/604   | R01_cb18456_c5441/flp2/604  | R01_cb18456_c5441/flp2/604   | R01_cb18456_c5441/flp2/604  | R01_cb18456_c5441/flp2/604  |
| R01_cb17345_c2/flp0/435      | R01_cb17345_c2/flp0/435     | R01_cb17345_c2/flp0/435      | R01_cb17345_c2/flp0/435     | R01_cb17345_c2/flp0/435     |
| R01_cb7653_c3/flp0/2544      | NA                          | R01_cb7653_c3/flp0/2544      | NA                          | NA                          |
| R01_cb17098_c1/flp0/697      | R01_cb17098_c1/flp0/697     | R01_cb17098_c1/flp0/697      | NA                          | NA                          |
| R01_cb8564_c90451/flp0/2698  | R01_cb8564_c90451/flp0/2698 | R01_cb8564_c90451/flp0/2698  | R01_cb8564_c90451/flp0/2698 | R01_cb8564_c90451/flp0/2698 |
| R01_cb8564_c125504/flp0/2676 | NA                          | R01_cb8564_c125504/flp0/2676 | NA                          | NA                          |
| R01_cb639_c5/flp0/886        | NA                          | NA                           | NA                          | R01_cb639_c5/flp0/886       |
| R01_cb8564_c1853/f2p0/2478   | NA                          | R01_cb8564_c1853/f2p0/2478   | R01_cb8564_c1853/f2p0/2478  | R01_cb8564_c1853/f2p0/2478  |
| R01_cb13131_c34/flp1/1713    | NA                          | R01_cb13131_c34/flp1/1713    | NA                          | NA                          |
| R01_cb18372_c22/flp0/2571    | NA                          | R01_cb18372_c22/flp0/2571    | R01_cb18372_c22/flp0/2571   | R01_cb18372_c22/flp0/2571   |
| R01_cb8564_c15409/flp1/4804  | NA                          | R01_cb8564_c15409/flp1/4804  | NA                          | NA                          |
| R01_cb17423_c0/f3p0/789      | NA                          | NA                           | NA                          | R01_cb17423_c0/f3p0/789     |
| R01_cb11087_c2/flp0/4793     | NA                          | R01_cb11087_c2/flp0/4793     | NA                          | NA                          |
| R01_cb6202_c2/flp0/2915      | NA                          | R01_cb6202_c2/flp0/2915      | NA                          | NA                          |
| R01_cb6101_c1/flp0/2933      | NA                          | R01_cb6101_c1/flp0/2933      | NA                          | NA                          |
| R01_cb14481_c6/flp1/1053     | NA                          | NA                           | NA                          | R01_cb14481_c6/flp1/1053    |

|                              |                             |                              |                             |                             |
|------------------------------|-----------------------------|------------------------------|-----------------------------|-----------------------------|
| R01_cb8564_c81953/f1p0/3828  | R01_cb8564_c81953/f1p0/3828 | R01_cb8564_c81953/f1p0/3828  | R01_cb8564_c81953/f1p0/3828 | R01_cb8564_c81953/f1p0/3828 |
| R01_cb8564_c16518/f1p0/3639  | NA                          | NA                           | NA                          | R01_cb8564_c16518/f1p0/3639 |
| R01_cb8564_c129933/f1p0/2634 | NA                          | R01_cb8564_c129933/f1p0/2634 | NA                          | NA                          |
| R01_cb8564_c91025/f1p1/2344  | NA                          | NA                           | NA                          | R01_cb8564_c91025/f1p1/2344 |
| R01_cb14573_c24/f1p0/1876    | NA                          | R01_cb14573_c24/f1p0/1876    | NA                          | NA                          |
| R01_cb3593_c8/f1p0/1266      | NA                          | R01_cb3593_c8/f1p0/1266      | NA                          | R01_cb3593_c8/f1p0/1266     |
| R01_cb8564_c41329/f3p0/2272  | R01_cb8564_c41329/f3p0/2272 | R01_cb8564_c41329/f3p0/2272  | R01_cb8564_c41329/f3p0/2272 | R01_cb8564_c41329/f3p0/2272 |
| R01_cb3857_c20/f1p0/1834     | NA                          | R01_cb3857_c20/f1p0/1834     | NA                          | R01_cb3857_c20/f1p0/1834    |
| R01_cb15725_c4/f1p0/1432     | NA                          | NA                           | NA                          | R01_cb15725_c4/f1p0/1432    |
| R01_cb8564_c2547/f1p0/2521   | NA                          | R01_cb8564_c2547/f1p0/2521   | R01_cb8564_c2547/f1p0/2521  | R01_cb8564_c2547/f1p0/2521  |
| R01_cb8564_c50301/f1p0/2398  | NA                          | R01_cb8564_c50301/f1p0/2398  | NA                          | NA                          |
| R01_cb3483_c7/f1p0/2730      | NA                          | NA                           | NA                          | R01_cb3483_c7/f1p0/2730     |
| R01_cb2320_c10/f1p0/3766     | NA                          | R01_cb2320_c10/f1p0/3766     | NA                          | R01_cb2320_c10/f1p0/3766    |
| R01_cb8564_c53693/f2p0/3706  | NA                          | R01_cb8564_c53693/f2p0/3706  | NA                          | NA                          |
| R01_cb5595_c39/f1p0/2521     | NA                          | NA                           | NA                          | R01_cb5595_c39/f1p0/2521    |
| R01_cb13982_c6/f1p0/1111     | NA                          | NA                           | NA                          | R01_cb13982_c6/f1p0/1111    |
| R01_cb11190_c0/f3p0/1684     | NA                          | NA                           | NA                          | R01_cb11190_c0/f3p0/1684    |
| R01_cb10923_c1/f1p0/2249     | NA                          | R01_cb10923_c1/f1p0/2249     | R01_cb10923_c1/f1p0/2249    | R01_cb10923_c1/f1p0/2249    |
| R01_cb10145_c5/f1p0/1761     | NA                          | NA                           | NA                          | R01_cb10145_c5/f1p0/1761    |
| R01_cb18456_c3724/f1p0/1121  | R01_cb18456_c3724/f1p0/1121 | R01_cb18456_c3724/f1p0/1121  | NA                          | R01_cb18456_c3724/f1p0/1121 |
| R01_cb13638_c2/f1p0/1162     | NA                          | NA                           | NA                          | R01_cb13638_c2/f1p0/1162    |
| R01_cb8564_c78493/f1p0/3078  | NA                          | R01_cb8564_c78493/f1p0/3078  | NA                          | NA                          |



|                             |                             |                             |                             |                             |
|-----------------------------|-----------------------------|-----------------------------|-----------------------------|-----------------------------|
| R01_cb13112_c9/f3p1/909     | NA                          | NA                          | R01_cb13112_c9/f3p1/909     | R01_cb13112_c9/f3p1/909     |
| R01_cb10040_c1/f1p0/2331    | NA                          | R01_cb10040_c1/f1p0/2331    | NA                          | NA                          |
| R01_cb8131_c3/f1p0/1050     | NA                          | NA                          | NA                          | R01_cb8131_c3/f1p0/1050     |
| R01_cb8564_c35234/f1p0/2655 | NA                          | NA                          | NA                          | R01_cb8564_c35234/f1p0/2655 |
| R01_cb5339_c6/f1p0/2507     | NA                          | NA                          | NA                          | R01_cb5339_c6/f1p0/2507     |
| R01_cb12365_c2/f3p0/604     | NA                          | R01_cb12365_c2/f3p0/604     | NA                          | NA                          |
| R01_cb15457_c9/f1p0/1732    | NA                          | R01_cb15457_c9/f1p0/1732    | NA                          | R01_cb15457_c9/f1p0/1732    |
| R01_cb8564_c69283/f2p2/1886 | NA                          | R01_cb8564_c69283/f2p2/1886 | R01_cb8564_c69283/f2p2/1886 | R01_cb8564_c69283/f2p2/1886 |
| R01_cb18073_c0/f1p0/985     | NA                          | R01_cb18073_c0/f1p0/985     | R01_cb18073_c0/f1p0/985     | R01_cb18073_c0/f1p0/985     |
| R01_cb5659_c75/f2p0/2112    | NA                          | NA                          | NA                          | R01_cb5659_c75/f2p0/2112    |
| R01_cb6580_c0/f1p0/2812     | R01_cb6580_c0/f1p0/2812     | NA                          | NA                          | NA                          |
| R01_cb8564_c114253/f1p0/264 | R01_cb8564_c114253/f1p0/264 | R01_cb8564_c114253/f1p0/264 | R01_cb8564_c114253/f1p0/264 | R01_cb8564_c114253/f1p0/264 |
| 4                           | 44                          | 4                           | 4                           | 4                           |
| R01_cb502_c29/f1p0/2029     | NA                          | R01_cb502_c29/f1p0/2029     | NA                          | NA                          |
| R01_cb5428_c2/f1p0/1624     | NA                          | R01_cb5428_c2/f1p0/1624     | NA                          | NA                          |
| R01_cb18287_c3/f1p0/1559    | NA                          | NA                          | NA                          | R01_cb18287_c3/f1p0/1559    |
| R01_cb13270_c3/f4p0/1393    | NA                          | NA                          | NA                          | R01_cb13270_c3/f4p0/1393    |
| R01_cb572_c4/f1p0/3571      | R01_cb572_c4/f1p0/3571      | R01_cb572_c4/f1p0/3571      | NA                          | NA                          |
| R01_cb12023_c5/f1p0/888     | NA                          | NA                          | NA                          | R01_cb12023_c5/f1p0/888     |
| R01_cb3281_c4/f1p0/3248     | NA                          | R01_cb3281_c4/f1p0/3248     | NA                          | NA                          |
| R01_cb988_c2/f1p0/917       | NA                          | R01_cb988_c2/f1p0/917       | R01_cb988_c2/f1p0/917       | R01_cb988_c2/f1p0/917       |
| R01_cb68_c8/f1p0/3018       | NA                          | NA                          | NA                          | R01_cb68_c8/f1p0/3018       |
| R01_cb8564_c88023/f1p0/3490 | NA                          | R01_cb8564_c88023/f1p0/3490 | R01_cb8564_c88023/f1p0/3490 | R01_cb8564_c88023/f1p0/3490 |
| R01_cb4538_c1/f2p0/3318     | NA                          | R01_cb4538_c1/f2p0/3318     | NA                          | NA                          |
| R01_cb8564_c81525/f1p0/3901 | NA                          | R01_cb8564_c81525/f1p0/3901 | NA                          | NA                          |
| R01_cb10152_c4/f1p0/660     | R01_cb10152_c4/f1p0/660     | NA                          | NA                          | NA                          |

|                             |                             |                             |                             |                             |
|-----------------------------|-----------------------------|-----------------------------|-----------------------------|-----------------------------|
| R01_cb15941_c2/flp0/1296    | NA                          | NA                          | NA                          | R01_cb15941_c2/flp0/1296    |
| R01_cb8564_c77551/flp0/2749 | NA                          | NA                          | R01_cb8564_c77551/flp0/2749 | R01_cb8564_c77551/flp0/2749 |
| R01_cb15952_c0/flp0/1341    | NA                          | NA                          | NA                          | R01_cb15952_c0/flp0/1341    |
| R01_cb14221_c4/flp0/1002    | NA                          | R01_cb14221_c4/flp0/1002    | NA                          | NA                          |
| R01_cb14898_c1/flp0/1681    | NA                          | R01_cb14898_c1/flp0/1681    | NA                          | R01_cb14898_c1/flp0/1681    |
| R01_cb16952_c2/flp0/1168    | NA                          | R01_cb16952_c2/flp0/1168    | NA                          | NA                          |
| R01_cb16648_c1/flp0/1583    | NA                          | R01_cb16648_c1/flp0/1583    | NA                          | R01_cb16648_c1/flp0/1583    |
| R01_cb920_c20/flp1/4332     | NA                          | NA                          | NA                          | R01_cb920_c20/flp1/4332     |
| R01_cb8809_c9/flp0/2312     | NA                          | NA                          | NA                          | R01_cb8809_c9/flp0/2312     |
| R01_cb8564_c16642/f3p1/3588 | NA                          | R01_cb8564_c16642/f3p1/3588 | NA                          | R01_cb8564_c16642/f3p1/3588 |
| R01_cb14955_c2/f2p1/1088    | NA                          | NA                          | NA                          | R01_cb14955_c2/f2p1/1088    |
| R01_cb1996_c0/flp0/4100     | NA                          | NA                          | NA                          | R01_cb1996_c0/flp0/4100     |
| R01_cb18456_c7579/flp0/1474 | NA                          | R01_cb18456_c7579/flp0/1474 | NA                          | R01_cb18456_c7579/flp0/1474 |
| R01_cb18456_c7180/f2p0/512  | R01_cb18456_c7180/f2p0/512  | R01_cb18456_c7180/f2p0/512  | R01_cb18456_c7180/f2p0/512  | R01_cb18456_c7180/f2p0/512  |
| R01_cb14153_c2/flp0/1014    | NA                          | R01_cb14153_c2/flp0/1014    | NA                          | NA                          |
| R01_cb18733_c0/flp0/5403    | NA                          | R01_cb18733_c0/flp0/5403    | NA                          | R01_cb18733_c0/flp0/5403    |
| R01_cb1739_c14/flp0/5622    | NA                          | NA                          | NA                          | R01_cb1739_c14/flp0/5622    |
| R01_cb8564_c70300/f2p0/2933 | R01_cb8564_c70300/f2p0/2933 | R01_cb8564_c70300/f2p0/2933 | R01_cb8564_c70300/f2p0/2933 | R01_cb8564_c70300/f2p0/2933 |
| R01_cb17865_c3/flp5/5005    | NA                          | NA                          | NA                          | R01_cb17865_c3/flp5/5005    |
| R01_cb8564_c19769/flp0/3665 | NA                          | R01_cb8564_c19769/flp0/3665 | NA                          | R01_cb8564_c19769/flp0/3665 |
| R01_cb3177_c0/flp0/3696     | NA                          | NA                          | NA                          | R01_cb3177_c0/flp0/3696     |
| R01_cb16577_c1/flp0/654     | NA                          | R01_cb16577_c1/flp0/654     | NA                          | R01_cb16577_c1/flp0/654     |
| R01_cb10724_c0/flp0/1019    | NA                          | NA                          | NA                          | R01_cb10724_c0/flp0/1019    |
| R01_cb868_c34/flp0/3812     | NA                          | R01_cb868_c34/flp0/3812     | NA                          | NA                          |
| R01_cb6147_c38/flp0/2414    | NA                          | R01_cb6147_c38/flp0/2414    | NA                          | NA                          |

|                              |                          |                              |                             |                            |
|------------------------------|--------------------------|------------------------------|-----------------------------|----------------------------|
| R01_cb14971_c4/flp0/1647     | NA                       | R01_cb14971_c4/flp0/1647     | NA                          | NA                         |
| R01_cb1124_c4/flp0/4458      | NA                       | NA                           | NA                          | R01_cb1124_c4/flp0/4458    |
| R01_cb12057_c24/flp1/995     | NA                       | R01_cb12057_c24/flp1/995     | NA                          | NA                         |
| R01_cb13772_c6/flp0/535      | NA                       | R01_cb13772_c6/flp0/535      | NA                          | NA                         |
| R01_cb4257_c11/flp0/3120     | NA                       | R01_cb4257_c11/flp0/3120     | NA                          | R01_cb4257_c11/flp0/3120   |
| R01_cb14704_c8/flp0/1779     | R01_cb14704_c8/flp0/1779 | R01_cb14704_c8/flp0/1779     | NA                          | R01_cb14704_c8/flp0/1779   |
| R01_cb7214_c4/flp0/2395      | NA                       | NA                           | NA                          | R01_cb7214_c4/flp0/2395    |
| R01_cb8564_c43733/flp0/3701  | NA                       | NA                           | R01_cb8564_c43733/flp0/3701 | NA                         |
| R01_cb15491_c0/f2p0/1598     | NA                       | NA                           | NA                          | R01_cb15491_c0/f2p0/1598   |
| R01_cb17933_c3/flp1/1170     | NA                       | R01_cb17933_c3/flp1/1170     | NA                          | NA                         |
| R01_cb8564_c70220/flp0/2788  | NA                       | R01_cb8564_c70220/flp0/2788  | NA                          | NA                         |
| R01_cb1438_c18/flp0/2810     | NA                       | NA                           | NA                          | R01_cb1438_c18/flp0/2810   |
| R01_cb2309_c6/flp0/2551      | NA                       | R01_cb2309_c6/flp0/2551      | NA                          | NA                         |
| R01_cb3972_c2/flp0/2502      | NA                       | R01_cb3972_c2/flp0/2502      | NA                          | R01_cb3972_c2/flp0/2502    |
| R01_cb14960_c4/flp0/1099     | NA                       | R01_cb14960_c4/flp0/1099     | NA                          | NA                         |
| R01_cb8564_c123277/flp0/2905 | NA                       | R01_cb8564_c123277/flp0/2905 | NA                          | NA                         |
| R01_cb6136_c1/flp0/2462      | NA                       | R01_cb6136_c1/flp0/2462      | NA                          | NA                         |
| R01_cb14853_c0/flp0/717      | R01_cb14853_c0/flp0/717  | R01_cb14853_c0/flp0/717      | R01_cb14853_c0/flp0/717     | R01_cb14853_c0/flp0/717    |
| R01_cb16022_c2/flp0/1335     | NA                       | R01_cb16022_c2/flp0/1335     | NA                          | NA                         |
| R01_cb6680_c1/flp0/2375      | NA                       | NA                           | NA                          | R01_cb6680_c1/flp0/2375    |
| R01_cb11057_c0/flp0/1828     | NA                       | NA                           | NA                          | R01_cb11057_c0/flp0/1828   |
| R01_cb16809_c0/f2p0/546      | NA                       | R01_cb16809_c0/f2p0/546      | NA                          | NA                         |
| R01_cb18456_c6887/flp0/1212  | NA                       | R01_cb18456_c6887/flp0/1212  | NA                          | NA                         |
| R01_cb14816_c2/flp0/949      | NA                       | R01_cb14816_c2/flp0/949      | NA                          | NA                         |
| R01_cb18456_c7524/flp0/943   | NA                       | R01_cb18456_c7524/flp0/943   | R01_cb18456_c7524/flp0/943  | R01_cb18456_c7524/flp0/943 |

|                             |                            |                             |                            |                             |
|-----------------------------|----------------------------|-----------------------------|----------------------------|-----------------------------|
| R01_cb18409_c104/flp0/1443  | R01_cb18409_c104/flp0/1443 | R01_cb18409_c104/flp0/1443  | R01_cb18409_c104/flp0/1443 | R01_cb18409_c104/flp0/1443  |
| R01_cb8905_c6/flp1/2018     | NA                         | NA                          | NA                         | R01_cb8905_c6/flp1/2018     |
| R01_cb3365_c2/flp0/3647     | NA                         | R01_cb3365_c2/flp0/3647     | NA                         | NA                          |
| R01_cb12589_c3/flp0/705     | R01_cb12589_c3/flp0/705    | NA                          | NA                         | R01_cb12589_c3/flp0/705     |
| R01_cb13178_c22/flp0/646    | NA                         | R01_cb13178_c22/flp0/646    | NA                         | NA                          |
| R01_cb16706_c2/flp0/677     | NA                         | R01_cb16706_c2/flp0/677     | NA                         | R01_cb16706_c2/flp0/677     |
| R01_cb16425_c3/flp0/659     | NA                         | R01_cb16425_c3/flp0/659     | R01_cb16425_c3/flp0/659    | R01_cb16425_c3/flp0/659     |
| R01_cb12680_c13/flp0/1839   | NA                         | R01_cb12680_c13/flp0/1839   | NA                         | NA                          |
| R01_cb6258_c9/flp1/2903     | NA                         | NA                          | NA                         | R01_cb6258_c9/flp1/2903     |
| R01_cb10034_c52/flp0/971    | NA                         | R01_cb10034_c52/flp0/971    | NA                         | NA                          |
| R01_cb12963_c3/flp0/1441    | NA                         | NA                          | NA                         | R01_cb12963_c3/flp0/1441    |
| R01_cb7457_c0/f7p0/431      | R01_cb7457_c0/f7p0/431     | R01_cb7457_c0/f7p0/431      | NA                         | NA                          |
| R01_cb4134_c40/flp0/2766    | NA                         | NA                          | NA                         | R01_cb4134_c40/flp0/2766    |
| R01_cb5943_c4/flp0/1485     | NA                         | NA                          | NA                         | R01_cb5943_c4/flp0/1485     |
| R01_cb6393_c2/flp0/3385     | NA                         | NA                          | NA                         | R01_cb6393_c2/flp0/3385     |
| R01_cb8564_c3170/flp0/2981  | NA                         | R01_cb8564_c3170/flp0/2981  | NA                         | NA                          |
| R01_cb14723_c4/flp1/1125    | NA                         | NA                          | NA                         | R01_cb14723_c4/flp1/1125    |
| R01_cb15811_c25/flp0/1262   | R01_cb15811_c25/flp0/1262  | R01_cb15811_c25/flp0/1262   | R01_cb15811_c25/flp0/1262  | R01_cb15811_c25/flp0/1262   |
| R01_cb13910_c15/flp0/1125   | NA                         | R01_cb13910_c15/flp0/1125   | R01_cb13910_c15/flp0/1125  | R01_cb13910_c15/flp0/1125   |
| R01_cb5533_c128/flp0/3072   | NA                         | NA                          | NA                         | R01_cb5533_c128/flp0/3072   |
| R01_cb8135_c3/flp1/1229     | R01_cb8135_c3/flp1/1229    | R01_cb8135_c3/flp1/1229     | NA                         | NA                          |
| R01_cb17231_c3/f2p0/701     | NA                         | NA                          | NA                         | R01_cb17231_c3/f2p0/701     |
| R01_cb2463_c8/flp0/2182     | NA                         | NA                          | NA                         | R01_cb2463_c8/flp0/2182     |
| R01_cb9928_c4/flp0/2967     | NA                         | NA                          | NA                         | R01_cb9928_c4/flp0/2967     |
| R01_cb1515_c1/flp0/2859     | NA                         | R01_cb1515_c1/flp0/2859     | R01_cb1515_c1/flp0/2859    | NA                          |
| R01_cb8564_c45851/flp0/4516 | R01_cb8564_c45851/flp0/451 | R01_cb8564_c45851/flp0/4516 | NA                         | R01_cb8564_c45851/flp0/4516 |

|                              |                            |                             |                            |                              |
|------------------------------|----------------------------|-----------------------------|----------------------------|------------------------------|
|                              | 6                          |                             |                            |                              |
| R01_cb8564_c75360/flp0/3610  | NA                         | R01_cb8564_c75360/flp0/3610 | NA                         | NA                           |
| R01_cb8564_c113809/flp0/3795 | NA                         | NA                          | NA                         | R01_cb8564_c113809/flp0/3795 |
| R01_cb17833_c1/flp0/517      | R01_cb17833_c1/flp0/517    | R01_cb17833_c1/flp0/517     | R01_cb17833_c1/flp0/517    | R01_cb17833_c1/flp0/517      |
| R01_cb13862_c8/flp1/1551     | NA                         | R01_cb13862_c8/flp1/1551    | R01_cb13862_c8/flp1/1551   | R01_cb13862_c8/flp1/1551     |
| R01_cb10402_c5/flp0/1553     | R01_cb10402_c5/flp0/1553   | R01_cb10402_c5/flp0/1553    | NA                         | NA                           |
| R01_cb18192_c4/flp0/808      | R01_cb18192_c4/flp0/808    | R01_cb18192_c4/flp0/808     | R01_cb18192_c4/flp0/808    | NA                           |
| R01_cb8564_c1093/flp0/3160   | NA                         | NA                          | NA                         | R01_cb8564_c1093/flp0/3160   |
| R01_cb2540_c5/flp0/500       | R01_cb2540_c5/flp0/500     | R01_cb2540_c5/flp0/500      | R01_cb2540_c5/flp0/500     | NA                           |
| R01_cb14761_c5/flp0/1481     | NA                         | R01_cb14761_c5/flp0/1481    | NA                         | NA                           |
| R01_cb12195_c5/flp1/1744     | NA                         | R01_cb12195_c5/flp1/1744    | NA                         | NA                           |
| R01_cb12750_c6/flp0/586      | NA                         | R01_cb12750_c6/flp0/586     | NA                         | R01_cb12750_c6/flp0/586      |
| R01_cb18456_c6764/flp0/1294  | NA                         | R01_cb18456_c6764/flp0/1294 | NA                         | NA                           |
| R01_cb10063_c16/flp0/598     | R01_cb10063_c16/flp0/598   | R01_cb10063_c16/flp0/598    | NA                         | NA                           |
| R01_cb18456_c7380/flp0/453   | R01_cb18456_c7380/flp0/453 | R01_cb18456_c7380/flp0/453  | R01_cb18456_c7380/flp0/453 | R01_cb18456_c7380/flp0/453   |
| R01_cb363_c7/flp0/1464       | NA                         | NA                          | NA                         | R01_cb363_c7/flp0/1464       |
| R01_cb8564_c42137/flp0/2446  | NA                         | NA                          | NA                         | R01_cb8564_c42137/flp0/2446  |
| R01_cb11245_c2/flp0/3396     | NA                         | R01_cb11245_c2/flp0/3396    | NA                         | NA                           |
| R01_cb10114_c1/flp0/2230     | NA                         | R01_cb10114_c1/flp0/2230    | NA                         | NA                           |
| R01_cb3962_c0/flp0/3461      | R01_cb3962_c0/flp0/3461    | R01_cb3962_c0/flp0/3461     | R01_cb3962_c0/flp0/3461    | R01_cb3962_c0/flp0/3461      |
| R01_cb8564_c22697/flp0/2203  | NA                         | R01_cb8564_c22697/flp0/2203 | NA                         | NA                           |
| R01_cb18243_c0/flp1/685      | NA                         | R01_cb18243_c0/flp1/685     | R01_cb18243_c0/flp1/685    | NA                           |
| R01_cb8564_c88064/flp0/4623  | NA                         | R01_cb8564_c88064/flp0/4623 | NA                         | NA                           |
| R01_cb8564_c71101/flp0/3411  | NA                         | R01_cb8564_c71101/flp0/3411 | NA                         | NA                           |
| R01_cb8564_c76942/flp1/2861  | NA                         | NA                          | NA                         | R01_cb8564_c76942/flp1/2861  |

|                              |                           |                              |                             |                             |
|------------------------------|---------------------------|------------------------------|-----------------------------|-----------------------------|
| R01_cb8771_c1/flp0/2261      | R01_cb8771_c1/flp0/2261   | R01_cb8771_c1/flp0/2261      | R01_cb8771_c1/flp0/2261     | R01_cb8771_c1/flp0/2261     |
| R01_cb14239_c21/flp0/430     | R01_cb14239_c21/flp0/430  | R01_cb14239_c21/flp0/430     | NA                          | R01_cb14239_c21/flp0/430    |
| R01_cb6365_c2/f3p0/2541      | R01_cb6365_c2/f3p0/2541   | R01_cb6365_c2/f3p0/2541      | NA                          | NA                          |
| R01_cb13879_c7/flp1/1466     | NA                        | R01_cb13879_c7/flp1/1466     | NA                          | NA                          |
| R01_cb18088_c0/f3p0/485      | NA                        | NA                           | NA                          | R01_cb18088_c0/f3p0/485     |
| R01_cb18301_c50/flp0/1432    | NA                        | R01_cb18301_c50/flp0/1432    | NA                          | NA                          |
| R01_cb8564_c51372/flp0/4218  | NA                        | R01_cb8564_c51372/flp0/4218  | R01_cb8564_c51372/flp0/4218 | R01_cb8564_c51372/flp0/4218 |
| R01_cb8692_c5/flp0/1761      | NA                        | R01_cb8692_c5/flp0/1761      | NA                          | NA                          |
| R01_cb2870_c8/flp0/2862      | NA                        | NA                           | NA                          | R01_cb2870_c8/flp0/2862     |
| R01_cb6198_c2/flp0/2107      | NA                        | R01_cb6198_c2/flp0/2107      | NA                          | R01_cb6198_c2/flp0/2107     |
| R01_cb16016_c5/flp0/984      | NA                        | NA                           | NA                          | R01_cb16016_c5/flp0/984     |
| R01_cb9628_c7/f2p0/2000      | NA                        | R01_cb9628_c7/f2p0/2000      | NA                          | NA                          |
| R01_cb8564_c4494/flp0/2545   | NA                        | R01_cb8564_c4494/flp0/2545   | R01_cb8564_c4494/flp0/2545  | R01_cb8564_c4494/flp0/2545  |
| R01_cb8991_c10/flp1/2179     | NA                        | NA                           | NA                          | R01_cb8991_c10/flp1/2179    |
| R01_cb9720_c4/flp0/1846      | NA                        | NA                           | NA                          | R01_cb9720_c4/flp0/1846     |
| R01_cb8564_c113604/flp0/2257 | NA                        | R01_cb8564_c113604/flp0/2257 | NA                          | NA                          |
| R01_cb6701_c2/flp0/2251      | R01_cb6701_c2/flp0/2251   | R01_cb6701_c2/flp0/2251      | R01_cb6701_c2/flp0/2251     | R01_cb6701_c2/flp0/2251     |
| R01_cb16455_c1/flp0/1119     | R01_cb16455_c1/flp0/1119  | R01_cb16455_c1/flp0/1119     | R01_cb16455_c1/flp0/1119    | R01_cb16455_c1/flp0/1119    |
| R01_cb16645_c24/flp0/1196    | R01_cb16645_c24/flp0/1196 | R01_cb16645_c24/flp0/1196    | R01_cb16645_c24/flp0/1196   | R01_cb16645_c24/flp0/1196   |
| R01_cb5499_c4/flp1/2908      | R01_cb5499_c4/flp1/2908   | R01_cb5499_c4/flp1/2908      | R01_cb5499_c4/flp1/2908     | R01_cb5499_c4/flp1/2908     |
| R01_cb8564_c111810/flp0/1947 | NA                        | R01_cb8564_c111810/flp0/1947 | NA                          | NA                          |
| R01_cb10157_c4/flp0/1127     | NA                        | R01_cb10157_c4/flp0/1127     | NA                          | R01_cb10157_c4/flp0/1127    |
| R01_cb8564_c48497/flp0/3125  | NA                        | NA                           | NA                          | R01_cb8564_c48497/flp0/3125 |
| R01_cb10663_c2/flp0/2293     | NA                        | R01_cb10663_c2/flp0/2293     | NA                          | NA                          |

|                             |                            |                             |                            |                             |
|-----------------------------|----------------------------|-----------------------------|----------------------------|-----------------------------|
| R01_cb14592_c5/flp0/604     | R01_cb14592_c5/flp0/604    | R01_cb14592_c5/flp0/604     | NA                         | R01_cb14592_c5/flp0/604     |
| R01_cb13133_c3/flp0/1095    | R01_cb13133_c3/flp0/1095   | R01_cb13133_c3/flp0/1095    | R01_cb13133_c3/flp0/1095   | R01_cb13133_c3/flp0/1095    |
| R01_cb15811_c32/flp0/908    | R01_cb15811_c32/flp0/908   | R01_cb15811_c32/flp0/908    | R01_cb15811_c32/flp0/908   | R01_cb15811_c32/flp0/908    |
| R01_cb1487_c6/flp0/1268     | NA                         | NA                          | NA                         | R01_cb1487_c6/flp0/1268     |
| R01_cb8564_c4736/flp0/3076  | R01_cb8564_c4736/flp0/3076 | R01_cb8564_c4736/flp0/3076  | NA                         | NA                          |
| R01_cb17587_c1/flp0/849     | R01_cb17587_c1/flp0/849    | R01_cb17587_c1/flp0/849     | R01_cb17587_c1/flp0/849    | R01_cb17587_c1/flp0/849     |
| R01_cb8564_c3734/flp0/2289  | NA                         | NA                          | NA                         | R01_cb8564_c3734/flp0/2289  |
| R01_cb1856_c4/flp0/2934     | NA                         | R01_cb1856_c4/flp0/2934     | NA                         | R01_cb1856_c4/flp0/2934     |
| R01_cb8564_c76370/flp0/1925 | NA                         | R01_cb8564_c76370/flp0/1925 | NA                         | NA                          |
| R01_cb1614_c4/flp0/4251     | NA                         | R01_cb1614_c4/flp0/4251     | NA                         | R01_cb1614_c4/flp0/4251     |
| R01_cb12401_c3/f2p1/1137    | NA                         | R01_cb12401_c3/f2p1/1137    | NA                         | NA                          |
| R01_cb12577_c26/flp0/937    | NA                         | NA                          | NA                         | R01_cb12577_c26/flp0/937    |
| R01_cb572_c3/flp0/4739      | R01_cb572_c3/flp0/4739     | R01_cb572_c3/flp0/4739      | R01_cb572_c3/flp0/4739     | NA                          |
| R01_cb8564_c4102/flp0/2734  | NA                         | R01_cb8564_c4102/flp0/2734  | R01_cb8564_c4102/flp0/2734 | NA                          |
| R01_cb5581_c3/flp0/2033     | NA                         | R01_cb5581_c3/flp0/2033     | NA                         | NA                          |
| R01_cb7980_c1/flp0/2188     | NA                         | R01_cb7980_c1/flp0/2188     | NA                         | NA                          |
| R01_cb8564_c50277/flp0/2782 | NA                         | R01_cb8564_c50277/flp0/2782 | NA                         | R01_cb8564_c50277/flp0/2782 |
| R01_cb10272_c12/flp0/4713   | NA                         | NA                          | R01_cb10272_c12/flp0/4713  | R01_cb10272_c12/flp0/4713   |
| R01_cb14125_c113/flp0/1276  | NA                         | R01_cb14125_c113/flp0/1276  | R01_cb14125_c113/flp0/1276 | NA                          |
| R01_cb141_c6/flp0/3332      | NA                         | NA                          | NA                         | R01_cb141_c6/flp0/3332      |
| R01_cb8564_c112533/flp0/238 | NA                         | NA                          | NA                         | R01_cb8564_c112533/flp0/238 |
| 3                           |                            |                             |                            | 3                           |
| R01_cb1915_c23/flp0/3434    | NA                         | R01_cb1915_c23/flp0/3434    | NA                         | R01_cb1915_c23/flp0/3434    |
| R01_cb822_c15/flp0/2423     | NA                         | NA                          | NA                         | R01_cb822_c15/flp0/2423     |
| R01_cb18147_c1/flp0/387     | R01_cb18147_c1/flp0/387    | R01_cb18147_c1/flp0/387     | R01_cb18147_c1/flp0/387    | R01_cb18147_c1/flp0/387     |
| R01_cb6086_c1/flp0/1945     | NA                         | NA                          | NA                         | R01_cb6086_c1/flp0/1945     |

|                                  |                         |                                  |                             |                                  |
|----------------------------------|-------------------------|----------------------------------|-----------------------------|----------------------------------|
| R01_cb1433_c9/f1p0/3065          | NA                      | R01_cb1433_c9/f1p0/3065          | NA                          | NA                               |
| R01_cb15581_c1/f1p0/772          | NA                      | NA                               | NA                          | R01_cb15581_c1/f1p0/772          |
| R01_cb8564_c128509/f1p0/255<br>2 | NA                      | NA                               | NA                          | R01_cb8564_c128509/f1p0/255<br>2 |
| R01_cb893_c11/f1p0/6190          | NA                      | NA                               | NA                          | R01_cb893_c11/f1p0/6190          |
| R01_cb16913_c1/f2p0/519          | R01_cb16913_c1/f2p0/519 | R01_cb16913_c1/f2p0/519          | R01_cb16913_c1/f2p0/519     | R01_cb16913_c1/f2p0/519          |
| R01_cb8564_c14116/f1p0/2968      | NA                      | NA                               | NA                          | R01_cb8564_c14116/f1p0/2968      |
| R01_cb7182_c11/f1p0/2681         | NA                      | R01_cb7182_c11/f1p0/2681         | NA                          | NA                               |
| R01_cb17945_c1/f1p0/727          | NA                      | R01_cb17945_c1/f1p0/727          | NA                          | NA                               |
| R01_cb6819_c7/f1p0/5270          | NA                      | NA                               | NA                          | R01_cb6819_c7/f1p0/5270          |
| R01_cb15776_c8/f1p1/1537         | NA                      | R01_cb15776_c8/f1p1/1537         | NA                          | NA                               |
| R01_cb8564_c2712/f1p1/2572       | NA                      | R01_cb8564_c2712/f1p1/2572       | NA                          | NA                               |
| R01_cb8564_c52788/f1p0/3297      | NA                      | NA                               | NA                          | R01_cb8564_c52788/f1p0/3297      |
| R01_cb7731_c13/f8p0/1386         | NA                      | NA                               | NA                          | R01_cb7731_c13/f8p0/1386         |
| R01_cb15860_c0/f2p0/510          | NA                      | NA                               | NA                          | R01_cb15860_c0/f2p0/510          |
| R01_cb8564_c121284/f1p0/285<br>2 | NA                      | R01_cb8564_c121284/f1p0/285<br>2 | NA                          | NA                               |
| R01_cb14560_c1/f6p0/752          | NA                      | NA                               | NA                          | R01_cb14560_c1/f6p0/752          |
| R01_cb8564_c72074/f1p0/2654      | NA                      | R01_cb8564_c72074/f1p0/2654      | R01_cb8564_c72074/f1p0/2654 | R01_cb8564_c72074/f1p0/2654      |
| R01_cb18456_c1818/f1p0/1365      | NA                      | NA                               | NA                          | R01_cb18456_c1818/f1p0/1365      |
| R01_cb104_c20/f1p0/1879          | NA                      | NA                               | NA                          | R01_cb104_c20/f1p0/1879          |
| R01_cb5881_c1/f1p0/2992          | NA                      | R01_cb5881_c1/f1p0/2992          | NA                          | NA                               |
| R01_cb5846_c57/f1p0/2797         | NA                      | NA                               | NA                          | R01_cb5846_c57/f1p0/2797         |
| R01_cb15298_c0/f3p0/526          | R01_cb15298_c0/f3p0/526 | R01_cb15298_c0/f3p0/526          | R01_cb15298_c0/f3p0/526     | R01_cb15298_c0/f3p0/526          |
| R01_cb12319_c4/f1p0/850          | NA                      | NA                               | NA                          | R01_cb12319_c4/f1p0/850          |
| R01_cb8564_c89787/f1p0/1945      | NA                      | R01_cb8564_c89787/f1p0/1945      | R01_cb8564_c89787/f1p0/1945 | R01_cb8564_c89787/f1p0/1945      |



|                             |                             |                             |                             |                             |
|-----------------------------|-----------------------------|-----------------------------|-----------------------------|-----------------------------|
| R01_cb18456_c4790/f1p0/513  | NA                          | NA                          | NA                          | R01_cb18456_c4790/f1p0/513  |
| R01_cb3194_c1/f1p0/3738     | NA                          | R01_cb3194_c1/f1p0/3738     | NA                          | NA                          |
| R01_cb18386_c15/f1p0/988    | NA                          | R01_cb18386_c15/f1p0/988    | R01_cb18386_c15/f1p0/988    | R01_cb18386_c15/f1p0/988    |
| R01_cb6680_c5/f1p0/2053     | NA                          | NA                          | NA                          | R01_cb6680_c5/f1p0/2053     |
| R01_cb18456_c3719/f1p0/1373 | R01_cb18456_c3719/f1p0/1373 | R01_cb18456_c3719/f1p0/1373 | NA                          | R01_cb18456_c3719/f1p0/1373 |
| R01_cb8564_c3322/f1p0/2919  | NA                          | R01_cb8564_c3322/f1p0/2919  | NA                          | NA                          |
| R01_cb13990_c0/f2p0/889     | NA                          | NA                          | NA                          | R01_cb13990_c0/f2p0/889     |
| R01_cb8564_c19197/f1p0/4795 | R01_cb8564_c19197/f1p0/4795 | R01_cb8564_c19197/f1p0/4795 | R01_cb8564_c19197/f1p0/4795 | R01_cb8564_c19197/f1p0/4795 |
| R01_cb3445_c3/f1p1/2831     | NA                          | NA                          | NA                          | R01_cb3445_c3/f1p1/2831     |
| R01_cb11433_c2/f1p0/1646    | NA                          | NA                          | NA                          | R01_cb11433_c2/f1p0/1646    |
| R01_cb18456_c2330/f1p0/644  | NA                          | R01_cb18456_c2330/f1p0/644  | R01_cb18456_c2330/f1p0/644  | R01_cb18456_c2330/f1p0/644  |
| R01_cb10945_c4/f1p0/702     | R01_cb10945_c4/f1p0/702     | R01_cb10945_c4/f1p0/702     | R01_cb10945_c4/f1p0/702     | R01_cb10945_c4/f1p0/702     |
| R01_cb8564_c34605/f2p0/2504 | NA                          | NA                          | R01_cb8564_c34605/f2p0/2504 | R01_cb8564_c34605/f2p0/2504 |
| R01_cb920_c13/f1p2/4504     | NA                          | NA                          | NA                          | R01_cb920_c13/f1p2/4504     |
| R01_cb7493_c5/f1p0/621      | NA                          | R01_cb7493_c5/f1p0/621      | NA                          | NA                          |
| R01_cb13161_c29/f1p0/356    | R01_cb13161_c29/f1p0/356    | R01_cb13161_c29/f1p0/356    | R01_cb13161_c29/f1p0/356    | R01_cb13161_c29/f1p0/356    |
| R01_cb8564_c79290/f1p0/2163 | NA                          | NA                          | R01_cb8564_c79290/f1p0/2163 | R01_cb8564_c79290/f1p0/2163 |
| R01_cb13778_c1/f1p0/599     | R01_cb13778_c1/f1p0/599     | R01_cb13778_c1/f1p0/599     | R01_cb13778_c1/f1p0/599     | R01_cb13778_c1/f1p0/599     |
| R01_cb10148_c2/f5p0/1744    | NA                          | NA                          | NA                          | R01_cb10148_c2/f5p0/1744    |
| R01_cb18456_c6925/f1p0/480  | NA                          | R01_cb18456_c6925/f1p0/480  | NA                          | R01_cb18456_c6925/f1p0/480  |
| R01_cb18218_c2/f1p0/1412    | NA                          | NA                          | NA                          | R01_cb18218_c2/f1p0/1412    |
| R01_cb8564_c76144/f1p0/3302 | NA                          | R01_cb8564_c76144/f1p0/3302 | NA                          | R01_cb8564_c76144/f1p0/3302 |
| R01_cb10293_c6/f1p1/2320    | NA                          | R01_cb10293_c6/f1p1/2320    | NA                          | NA                          |
| R01_cb9008_c4/f1p1/2426     | NA                          | NA                          | R01_cb9008_c4/f1p1/2426     | NA                          |

|                              |                             |                              |                             |                             |
|------------------------------|-----------------------------|------------------------------|-----------------------------|-----------------------------|
| R01_cb8564_c129284/f1p0/2118 | NA                          | R01_cb8564_c129284/f1p0/2118 | NA                          | NA                          |
| R01_cb17636_c3/f1p0/1270     | R01_cb17636_c3/f1p0/1270    | R01_cb17636_c3/f1p0/1270     | NA                          | NA                          |
| R01_cb14676_c0/f2p0/1396     | NA                          | R01_cb14676_c0/f2p0/1396     | NA                          | NA                          |
| R01_cb13545_c46/f1p0/566     | NA                          | R01_cb13545_c46/f1p0/566     | R01_cb13545_c46/f1p0/566    | R01_cb13545_c46/f1p0/566    |
| R01_cb8564_c88449/f1p0/2455  | NA                          | R01_cb8564_c88449/f1p0/2455  | NA                          | NA                          |
| R01_cb18456_c1133/f3p1/635   | NA                          | R01_cb18456_c1133/f3p1/635   | NA                          | NA                          |
| R01_cb8564_c23068/f2p0/3892  | NA                          | R01_cb8564_c23068/f2p0/3892  | R01_cb8564_c23068/f2p0/3892 | R01_cb8564_c23068/f2p0/3892 |
| R01_cb2445_c27/f1p0/2957     | NA                          | NA                           | NA                          | R01_cb2445_c27/f1p0/2957    |
| R01_cb8564_c90701/f1p0/2158  | R01_cb8564_c90701/f1p0/2158 | R01_cb8564_c90701/f1p0/2158  | R01_cb8564_c90701/f1p0/2158 | R01_cb8564_c90701/f1p0/2158 |
| R01_cb18599_c0/f1p0/1056     | NA                          | R01_cb18599_c0/f1p0/1056     | NA                          | NA                          |
| R01_cb18456_c3723/f1p0/1453  | NA                          | R01_cb18456_c3723/f1p0/1453  | NA                          | R01_cb18456_c3723/f1p0/1453 |
| R01_cb15701_c5/f1p0/1466     | NA                          | R01_cb15701_c5/f1p0/1466     | NA                          | NA                          |
| R01_cb8564_c10484/f1p0/2516  | NA                          | R01_cb8564_c10484/f1p0/2516  | NA                          | R01_cb8564_c10484/f1p0/2516 |
| R01_cb16394_c0/f2p0/989      | NA                          | R01_cb16394_c0/f2p0/989      | R01_cb16394_c0/f2p0/989     | R01_cb16394_c0/f2p0/989     |
| R01_cb639_c8/f1p0/668        | NA                          | NA                           | NA                          | R01_cb639_c8/f1p0/668       |
| R01_cb9106_c1/f1p0/2183      | NA                          | NA                           | R01_cb9106_c1/f1p0/2183     | NA                          |
| R01_cb6337_c1/f1p0/2134      | NA                          | NA                           | NA                          | R01_cb6337_c1/f1p0/2134     |
| R01_cb3358_c0/f2p0/3345      | R01_cb3358_c0/f2p0/3345     | R01_cb3358_c0/f2p0/3345      | R01_cb3358_c0/f2p0/3345     | R01_cb3358_c0/f2p0/3345     |
| R01_cb13938_c29/f5p0/1498    | NA                          | NA                           | NA                          | R01_cb13938_c29/f5p0/1498   |
| R01_cb8278_c3/f1p0/964       | NA                          | R01_cb8278_c3/f1p0/964       | NA                          | NA                          |
| R01_cb7976_c13/f1p0/2220     | NA                          | R01_cb7976_c13/f1p0/2220     | NA                          | NA                          |
| R01_cb1039_c47/f1p0/1829     | NA                          | R01_cb1039_c47/f1p0/1829     | R01_cb1039_c47/f1p0/1829    | R01_cb1039_c47/f1p0/1829    |
| R01_cb10879_c0/f1p0/1650     | NA                          | R01_cb10879_c0/f1p0/1650     | R01_cb10879_c0/f1p0/1650    | R01_cb10879_c0/f1p0/1650    |
| R01_cb8564_c129858/f1p0/242  | NA                          | NA                           | NA                          | R01_cb8564_c129858/f1p0/242 |



|                              |                              |                              |                            |                              |
|------------------------------|------------------------------|------------------------------|----------------------------|------------------------------|
| R01_cb18456_c4788/flp0/466   | NA                           | NA                           | NA                         | R01_cb18456_c4788/flp0/466   |
| R01_cb10355_c3/flp0/638      | NA                           | R01_cb10355_c3/flp0/638      | NA                         | NA                           |
| R01_cb822_c13/flp0/2650      | NA                           | NA                           | NA                         | R01_cb822_c13/flp0/2650      |
| R01_cb8564_c125450/flp1/2354 | R01_cb8564_c125450/flp1/2354 | R01_cb8564_c125450/flp1/2354 | NA                         | R01_cb8564_c125450/flp1/2354 |
| R01_cb6199_c20/flp0/3192     | NA                           | NA                           | NA                         | R01_cb6199_c20/flp0/3192     |
| R01_cb17084_c3/flp0/707      | R01_cb17084_c3/flp0/707      | R01_cb17084_c3/flp0/707      | NA                         | R01_cb17084_c3/flp0/707      |
| R01_cb18456_c6646/flp0/707   | NA                           | NA                           | NA                         | R01_cb18456_c6646/flp0/707   |
| R01_cb10983_c3/flp0/839      | NA                           | R01_cb10983_c3/flp0/839      | R01_cb10983_c3/flp0/839    | R01_cb10983_c3/flp0/839      |
| R01_cb8564_c128065/flp0/2159 | NA                           | R01_cb8564_c128065/flp0/2159 | NA                         | NA                           |
| R01_cb15811_c2/fl1p0/1405    | NA                           | NA                           | R01_cb15811_c2/fl1p0/1405  | NA                           |
| R01_cb3921_c4/flp0/1981      | NA                           | NA                           | NA                         | R01_cb3921_c4/flp0/1981      |
| R01_cb2927_c12/fl1p1/2996    | NA                           | R01_cb2927_c12/fl1p1/2996    | NA                         | NA                           |
| R01_cb8564_c75298/flp0/2148  | NA                           | R01_cb8564_c75298/flp0/2148  | NA                         | NA                           |
| R01_cb8200_c8/flp0/1425      | NA                           | R01_cb8200_c8/flp0/1425      | R01_cb8200_c8/flp0/1425    | R01_cb8200_c8/flp0/1425      |
| R01_cb1822_c9/flp0/2216      | NA                           | NA                           | NA                         | R01_cb1822_c9/flp0/2216      |
| R01_cb8564_c4690/flp0/3065   | R01_cb8564_c4690/flp0/3065   | R01_cb8564_c4690/flp0/3065   | R01_cb8564_c4690/flp0/3065 | R01_cb8564_c4690/flp0/3065   |
| R01_cb12851_c3/flp0/1240     | NA                           | NA                           | NA                         | R01_cb12851_c3/flp0/1240     |
| R01_cb8564_c45289/flp0/2306  | NA                           | R01_cb8564_c45289/flp0/2306  | NA                         | NA                           |
| R01_cb254_c18/flp0/3813      | NA                           | R01_cb254_c18/flp0/3813      | NA                         | R01_cb254_c18/flp0/3813      |
| R01_cb8475_c0/flp0/2353      | NA                           | R01_cb8475_c0/flp0/2353      | NA                         | NA                           |
| R01_cb8564_c79147/flp0/3741  | NA                           | R01_cb8564_c79147/flp0/3741  | NA                         | NA                           |
| R01_cb88_c24/flp0/2478       | NA                           | NA                           | NA                         | R01_cb88_c24/flp0/2478       |
| R01_cb3169_c0/flp0/3707      | NA                           | NA                           | NA                         | R01_cb3169_c0/flp0/3707      |
| R01_cb10596_c5/flp0/3599     | NA                           | R01_cb10596_c5/flp0/3599     | NA                         | NA                           |

|                             |                            |                             |                             |                             |
|-----------------------------|----------------------------|-----------------------------|-----------------------------|-----------------------------|
| R01_cb17346_c1/flp0/1168    | R01_cb17346_c1/flp0/1168   | R01_cb17346_c1/flp0/1168    | R01_cb17346_c1/flp0/1168    | R01_cb17346_c1/flp0/1168    |
| R01_cb1653_c1/flp0/4225     | NA                         | NA                          | NA                          | R01_cb1653_c1/flp0/4225     |
| R01_cb625_c5/flp0/3261      | NA                         | NA                          | NA                          | R01_cb625_c5/flp0/3261      |
| R01_cb124_c8/f2p0/3745      | NA                         | NA                          | NA                          | R01_cb124_c8/f2p0/3745      |
| R01_cb8713_c0/flp0/2285     | NA                         | R01_cb8713_c0/flp0/2285     | NA                          | NA                          |
| R01_cb11988_c7/flp0/1578    | NA                         | R01_cb11988_c7/flp0/1578    | NA                          | NA                          |
| R01_cb18456_c7936/f3p1/386  | R01_cb18456_c7936/f3p1/386 | R01_cb18456_c7936/f3p1/386  | NA                          | R01_cb18456_c7936/f3p1/386  |
| R01_cb17531_c4/flp0/1403    | NA                         | R01_cb17531_c4/flp0/1403    | R01_cb17531_c4/flp0/1403    | R01_cb17531_c4/flp0/1403    |
| R01_cb10464_c1/flp0/3172    | NA                         | R01_cb10464_c1/flp0/3172    | NA                          | NA                          |
| R01_cb6616_c10/flp1/437     | R01_cb6616_c10/flp1/437    | R01_cb6616_c10/flp1/437     | R01_cb6616_c10/flp1/437     | R01_cb6616_c10/flp1/437     |
| R01_cb8564_c4103/flp0/2941  | NA                         | R01_cb8564_c4103/flp0/2941  | R01_cb8564_c4103/flp0/2941  | NA                          |
| R01_cb17114_c0/f2p0/952     | NA                         | NA                          | NA                          | R01_cb17114_c0/f2p0/952     |
| R01_cb1203_c4/flp0/4549     | NA                         | NA                          | NA                          | R01_cb1203_c4/flp0/4549     |
| R01_cb6886_c3/flp0/2584     | NA                         | R01_cb6886_c3/flp0/2584     | NA                          | NA                          |
| R01_cb8564_c89561/flp0/2394 | NA                         | R01_cb8564_c89561/flp0/2394 | R01_cb8564_c89561/flp0/2394 | R01_cb8564_c89561/flp0/2394 |
| R01_cb10190_c3/flp0/1585    | R01_cb10190_c3/flp0/1585   | R01_cb10190_c3/flp0/1585    | R01_cb10190_c3/flp0/1585    | R01_cb10190_c3/flp0/1585    |
| R01_cb506_c2/flp0/4681      | NA                         | NA                          | NA                          | R01_cb506_c2/flp0/4681      |
| R01_cb18590_c2/flp0/703     | NA                         | NA                          | R01_cb18590_c2/flp0/703     | NA                          |
| R01_cb17709_c0/f2p0/547     | R01_cb17709_c0/f2p0/547    | R01_cb17709_c0/f2p0/547     | R01_cb17709_c0/f2p0/547     | NA                          |
| R01_cb7064_c9/flp0/1480     | NA                         | R01_cb7064_c9/flp0/1480     | NA                          | NA                          |
| R01_cb14086_c2/flp0/867     | NA                         | R01_cb14086_c2/flp0/867     | NA                          | R01_cb14086_c2/flp0/867     |
| R01_cb8564_c78490/flp1/3430 | NA                         | NA                          | NA                          | R01_cb8564_c78490/flp1/3430 |
| R01_cb5448_c5/flp0/1537     | NA                         | R01_cb5448_c5/flp0/1537     | NA                          | NA                          |
| R01_cb7594_c10/flp0/2210    | NA                         | R01_cb7594_c10/flp0/2210    | NA                          | NA                          |
| R01_cb13875_c2/f3p1/1096    | NA                         | NA                          | NA                          | R01_cb13875_c2/f3p1/1096    |
| R01_cb8564_c2983/flp0/2648  | NA                         | R01_cb8564_c2983/flp0/2648  | R01_cb8564_c2983/flp0/2648  | R01_cb8564_c2983/flp0/2648  |

|                              |                              |                              |                              |                              |
|------------------------------|------------------------------|------------------------------|------------------------------|------------------------------|
| R01_cb2182_c7/flp0/331       | R01_cb2182_c7/flp0/331       | R01_cb2182_c7/flp0/331       | R01_cb2182_c7/flp0/331       | R01_cb2182_c7/flp0/331       |
| R01_cb1982_c3/flp0/2118      | NA                           | R01_cb1982_c3/flp0/2118      | R01_cb1982_c3/flp0/2118      | R01_cb1982_c3/flp0/2118      |
| R01_cb6253_c1/flp0/2817      | R01_cb6253_c1/flp0/2817      | R01_cb6253_c1/flp0/2817      | R01_cb6253_c1/flp0/2817      | R01_cb6253_c1/flp0/2817      |
| R01_cb10024_c213/flp0/716    | NA                           | NA                           | R01_cb10024_c213/flp0/716    | NA                           |
| R01_cb8433_c3/flp0/2627      | NA                           | NA                           | NA                           | R01_cb8433_c3/flp0/2627      |
| R01_cb15784_c1/f2p0/1460     | NA                           | NA                           | NA                           | R01_cb15784_c1/f2p0/1460     |
| R01_cb1626_c15/flp0/2204     | NA                           | NA                           | NA                           | R01_cb1626_c15/flp0/2204     |
| R01_cb8564_c128557/f2p0/2916 | R01_cb8564_c128557/f2p0/2916 | R01_cb8564_c128557/f2p0/2916 | R01_cb8564_c128557/f2p0/2916 | R01_cb8564_c128557/f2p0/2916 |
| R01_cb17542_c0/flp0/427      | NA                           | R01_cb17542_c0/flp0/427      | R01_cb17542_c0/flp0/427      | R01_cb17542_c0/flp0/427      |
| R01_cb10385_c11/flp0/1423    | R01_cb10385_c11/flp0/1423    | R01_cb10385_c11/flp0/1423    | R01_cb10385_c11/flp0/1423    | R01_cb10385_c11/flp0/1423    |
| R01_cb17221_c6/flp0/1522     | NA                           | R01_cb17221_c6/flp0/1522     | NA                           | NA                           |
| R01_cb13999_c9/flp0/481      | R01_cb13999_c9/flp0/481      | R01_cb13999_c9/flp0/481      | R01_cb13999_c9/flp0/481      | R01_cb13999_c9/flp0/481      |
| R01_cb17780_c0/flp0/641      | R01_cb17780_c0/flp0/641      | R01_cb17780_c0/flp0/641      | R01_cb17780_c0/flp0/641      | R01_cb17780_c0/flp0/641      |
| R01_cb16370_c2/flp0/966      | NA                           | R01_cb16370_c2/flp0/966      | NA                           | R01_cb16370_c2/flp0/966      |
| R01_cb5640_c7/f2p0/2229      | NA                           | NA                           | NA                           | R01_cb5640_c7/f2p0/2229      |
| R01_cb16460_c1/f2p0/544      | NA                           | R01_cb16460_c1/f2p0/544      | R01_cb16460_c1/f2p0/544      | R01_cb16460_c1/f2p0/544      |
| R01_cb13463_c7/flp0/368      | R01_cb13463_c7/flp0/368      | R01_cb13463_c7/flp0/368      | R01_cb13463_c7/flp0/368      | R01_cb13463_c7/flp0/368      |
| R01_cb7999_c5/flp0/996       | R01_cb7999_c5/flp0/996       | R01_cb7999_c5/flp0/996       | NA                           | R01_cb7999_c5/flp0/996       |
| R01_cb2452_c1/flp0/3807      | NA                           | R01_cb2452_c1/flp0/3807      | NA                           | NA                           |
| R01_cb9354_c0/flp0/2101      | NA                           | NA                           | NA                           | R01_cb9354_c0/flp0/2101      |
| R01_cb14399_c1/flp0/1170     | NA                           | NA                           | NA                           | R01_cb14399_c1/flp0/1170     |
| R01_cb6442_c14/flp0/1684     | R01_cb6442_c14/flp0/1684     | R01_cb6442_c14/flp0/1684     | NA                           | R01_cb6442_c14/flp0/1684     |
| R01_cb4634_c17/flp0/2349     | NA                           | R01_cb4634_c17/flp0/2349     | NA                           | NA                           |
| R01_cb1610_c2/flp0/4245      | NA                           | NA                           | NA                           | R01_cb1610_c2/flp0/4245      |
| R01_cb1398_c7/flp0/2599      | NA                           | R01_cb1398_c7/flp0/2599      | R01_cb1398_c7/flp0/2599      | NA                           |

|                             |                             |                             |                             |                             |
|-----------------------------|-----------------------------|-----------------------------|-----------------------------|-----------------------------|
| R01_cb8564_c24206/f1p0/2126 | NA                          | R01_cb8564_c24206/f1p0/2126 | R01_cb8564_c24206/f1p0/2126 | R01_cb8564_c24206/f1p0/2126 |
| R01_cb3759_c6/f1p0/2298     | NA                          | R01_cb3759_c6/f1p0/2298     | NA                          | NA                          |
| R01_cb1388_c17/f1p0/4640    | NA                          | NA                          | NA                          | R01_cb1388_c17/f1p0/4640    |
| R01_cb15980_c6/f1p0/309     | R01_cb15980_c6/f1p0/309     | R01_cb15980_c6/f1p0/309     | R01_cb15980_c6/f1p0/309     | R01_cb15980_c6/f1p0/309     |
| R01_cb8564_c16763/f1p0/4168 | NA                          | NA                          | NA                          | R01_cb8564_c16763/f1p0/4168 |
| R01_cb8564_c74352/f1p0/3696 | NA                          | R01_cb8564_c74352/f1p0/3696 | NA                          | R01_cb8564_c74352/f1p0/3696 |
| R01_cb5208_c2/f2p1/2653     | NA                          | NA                          | NA                          | R01_cb5208_c2/f2p1/2653     |
| R01_cb18456_c5731/f2p2/812  | NA                          | R01_cb18456_c5731/f2p2/812  | NA                          | NA                          |
| R01_cb16341_c11/f1p0/442    | R01_cb16341_c11/f1p0/442    | R01_cb16341_c11/f1p0/442    | R01_cb16341_c11/f1p0/442    | R01_cb16341_c11/f1p0/442    |
| R01_cb7822_c3/f1p0/3275     | NA                          | R01_cb7822_c3/f1p0/3275     | R01_cb7822_c3/f1p0/3275     | R01_cb7822_c3/f1p0/3275     |
| R01_cb8905_c7/f1p0/2108     | NA                          | NA                          | NA                          | R01_cb8905_c7/f1p0/2108     |
| R01_cb16422_c0/f4p0/825     | NA                          | NA                          | NA                          | R01_cb16422_c0/f4p0/825     |
| R01_cb5853_c3/f1p1/1763     | NA                          | R01_cb5853_c3/f1p1/1763     | R01_cb5853_c3/f1p1/1763     | NA                          |
| R01_cb18456_c1828/f1p0/1498 | R01_cb18456_c1828/f1p0/1498 | R01_cb18456_c1828/f1p0/1498 | R01_cb18456_c1828/f1p0/1498 | R01_cb18456_c1828/f1p0/1498 |
| R01_cb4639_c6/f1p0/2609     | NA                          | NA                          | NA                          | R01_cb4639_c6/f1p0/2609     |
| R01_cb1788_c0/f1p0/4170     | NA                          | NA                          | NA                          | R01_cb1788_c0/f1p0/4170     |
| R01_cb8564_c41059/f1p0/2332 | R01_cb8564_c41059/f1p0/2332 | R01_cb8564_c41059/f1p0/2332 | R01_cb8564_c41059/f1p0/2332 | R01_cb8564_c41059/f1p0/2332 |
| R01_cb13501_c9/f1p0/591     | NA                          | R01_cb13501_c9/f1p0/591     | NA                          | NA                          |
| R01_cb7695_c2/f1p0/3798     | NA                          | NA                          | NA                          | R01_cb7695_c2/f1p0/3798     |
| R01_cb14239_c15/f1p0/814    | R01_cb14239_c15/f1p0/814    | R01_cb14239_c15/f1p0/814    | NA                          | R01_cb14239_c15/f1p0/814    |
| R01_cb13106_c16/f1p0/585    | R01_cb13106_c16/f1p0/585    | R01_cb13106_c16/f1p0/585    | R01_cb13106_c16/f1p0/585    | R01_cb13106_c16/f1p0/585    |
| R01_cb11460_c2/f1p0/4570    | NA                          | R01_cb11460_c2/f1p0/4570    | NA                          | NA                          |
| R01_cb8564_c17007/f1p0/3657 | NA                          | NA                          | NA                          | R01_cb8564_c17007/f1p0/3657 |
| R01_cb8564_c92112/f1p0/1974 | NA                          | R01_cb8564_c92112/f1p0/1974 | R01_cb8564_c92112/f1p0/1974 | R01_cb8564_c92112/f1p0/1974 |

|                             |                            |                             |                             |                             |
|-----------------------------|----------------------------|-----------------------------|-----------------------------|-----------------------------|
| R01_cb2463_c6/flp0/2503     | NA                         | NA                          | NA                          | R01_cb2463_c6/flp0/2503     |
| R01_cb18456_c1829/flp0/651  | R01_cb18456_c1829/flp0/651 | R01_cb18456_c1829/flp0/651  | R01_cb18456_c1829/flp0/651  | R01_cb18456_c1829/flp0/651  |
| R01_cb551_c6/flp0/4749      | NA                         | R01_cb551_c6/flp0/4749      | NA                          | NA                          |
| R01_cb8564_c73825/flp0/4350 | NA                         | R01_cb8564_c73825/flp0/4350 | NA                          | NA                          |
| R01_cb8564_c16195/flp1/4149 | NA                         | R01_cb8564_c16195/flp1/4149 | R01_cb8564_c16195/flp1/4149 | R01_cb8564_c16195/flp1/4149 |
| R01_cb5340_c0/flp0/3122     | R01_cb5340_c0/flp0/3122    | R01_cb5340_c0/flp0/3122     | R01_cb5340_c0/flp0/3122     | NA                          |
| R01_cb16383_c9/flp0/1463    | NA                         | R01_cb16383_c9/flp0/1463    | R01_cb16383_c9/flp0/1463    | NA                          |
| R01_cb18519_c0/f2p0/752     | NA                         | NA                          | NA                          | R01_cb18519_c0/f2p0/752     |
| R01_cb9430_c0/flp0/2087     | R01_cb9430_c0/flp0/2087    | R01_cb9430_c0/flp0/2087     | R01_cb9430_c0/flp0/2087     | R01_cb9430_c0/flp0/2087     |
| R01_cb2822_c4/flp0/3300     | NA                         | R01_cb2822_c4/flp0/3300     | NA                          | R01_cb2822_c4/flp0/3300     |
| R01_cb8564_c50698/flp0/2433 | NA                         | R01_cb8564_c50698/flp0/2433 | R01_cb8564_c50698/flp0/2433 | R01_cb8564_c50698/flp0/2433 |
| R01_cb9847_c4/flp0/2763     | NA                         | R01_cb9847_c4/flp0/2763     | NA                          | NA                          |
| R01_cb2960_c3/flp0/2973     | NA                         | NA                          | NA                          | R01_cb2960_c3/flp0/2973     |
| R01_cb8564_c78516/flp0/3292 | NA                         | R01_cb8564_c78516/flp0/3292 | NA                          | NA                          |
| R01_cb8068_c4/flp0/2466     | NA                         | R01_cb8068_c4/flp0/2466     | NA                          | NA                          |
| R01_cb2834_c7/flp1/2050     | NA                         | NA                          | NA                          | R01_cb2834_c7/flp1/2050     |
| R01_cb8564_c45869/flp0/3574 | NA                         | NA                          | NA                          | R01_cb8564_c45869/flp0/3574 |
| R01_cb6680_c2/flp0/2670     | NA                         | NA                          | NA                          | R01_cb6680_c2/flp0/2670     |
| R01_cb8324_c3/flp0/2404     | NA                         | NA                          | NA                          | R01_cb8324_c3/flp0/2404     |
| R01_cb2180_c1/flp0/4023     | NA                         | R01_cb2180_c1/flp0/4023     | NA                          | NA                          |
| R01_cb505_c3/flp0/2298      | NA                         | R01_cb505_c3/flp0/2298      | NA                          | NA                          |
| R01_cb11526_c1/flp0/2353    | NA                         | R01_cb11526_c1/flp0/2353    | NA                          | NA                          |
| R01_cb12443_c9/f24p2/498    | NA                         | R01_cb12443_c9/f24p2/498    | R01_cb12443_c9/f24p2/498    | R01_cb12443_c9/f24p2/498    |
| R01_cb373_c40/flp0/4542     | NA                         | R01_cb373_c40/flp0/4542     | NA                          | NA                          |
| R01_cb6350_c13/flp1/1393    | NA                         | R01_cb6350_c13/flp1/1393    | R01_cb6350_c13/flp1/1393    | R01_cb6350_c13/flp1/1393    |
| R01_cb15725_c8/f2p0/1464    | NA                         | NA                          | NA                          | R01_cb15725_c8/f2p0/1464    |



|                             |                          |                             |                             |                             |
|-----------------------------|--------------------------|-----------------------------|-----------------------------|-----------------------------|
| R01_cb1675_c4/flp0/3406     | NA                       | NA                          | NA                          | R01_cb1675_c4/flp0/3406     |
| R01_cb8014_c2/flp0/2482     | NA                       | R01_cb8014_c2/flp0/2482     | NA                          | R01_cb8014_c2/flp0/2482     |
| R01_cb17200_c0/flp0/923     | NA                       | R01_cb17200_c0/flp0/923     | R01_cb17200_c0/flp0/923     | R01_cb17200_c0/flp0/923     |
| R01_cb6348_c5/flp0/2756     | NA                       | NA                          | NA                          | R01_cb6348_c5/flp0/2756     |
| R01_cb12883_c4/flp0/506     | R01_cb12883_c4/flp0/506  | R01_cb12883_c4/flp0/506     | NA                          | NA                          |
| R01_cb3650_c17/flp0/477     | R01_cb3650_c17/flp0/477  | R01_cb3650_c17/flp0/477     | R01_cb3650_c17/flp0/477     | R01_cb3650_c17/flp0/477     |
| R01_cb8650_c2/flp0/2263     | NA                       | R01_cb8650_c2/flp0/2263     | R01_cb8650_c2/flp0/2263     | NA                          |
| R01_cb8564_c71121/flp0/2073 | NA                       | R01_cb8564_c71121/flp0/2073 | NA                          | NA                          |
| R01_cb6452_c6/flp0/2905     | NA                       | R01_cb6452_c6/flp0/2905     | NA                          | R01_cb6452_c6/flp0/2905     |
| R01_cb16997_c20/flp0/1834   | NA                       | R01_cb16997_c20/flp0/1834   | R01_cb16997_c20/flp0/1834   | R01_cb16997_c20/flp0/1834   |
| R01_cb6548_c22/flp0/2266    | R01_cb6548_c22/flp0/2266 | R01_cb6548_c22/flp0/2266    | R01_cb6548_c22/flp0/2266    | R01_cb6548_c22/flp0/2266    |
| R01_cb10496_c1/f4p0/1487    | NA                       | NA                          | NA                          | R01_cb10496_c1/f4p0/1487    |
| R01_cb8564_c18554/flp0/3189 | NA                       | R01_cb8564_c18554/flp0/3189 | R01_cb8564_c18554/flp0/3189 | R01_cb8564_c18554/flp0/3189 |
| R01_cb4410_c1/flp0/3728     | NA                       | R01_cb4410_c1/flp0/3728     | NA                          | R01_cb4410_c1/flp0/3728     |
| R01_cb10917_c1/flp0/1091    | NA                       | NA                          | NA                          | R01_cb10917_c1/flp0/1091    |
| R01_cb16192_c5/flp0/1057    | NA                       | NA                          | NA                          | R01_cb16192_c5/flp0/1057    |
| R01_cb8582_c3/flp0/1194     | NA                       | R01_cb8582_c3/flp0/1194     | R01_cb8582_c3/flp0/1194     | R01_cb8582_c3/flp0/1194     |
| R01_cb8564_c4722/flp0/2354  | NA                       | R01_cb8564_c4722/flp0/2354  | R01_cb8564_c4722/flp0/2354  | R01_cb8564_c4722/flp0/2354  |
| R01_cb17649_c1/flp0/663     | NA                       | NA                          | NA                          | R01_cb17649_c1/flp0/663     |
| R01_cb12955_c8/flp0/1019    | NA                       | R01_cb12955_c8/flp0/1019    | NA                          | NA                          |
| R01_cb8386_c1/f2p0/2386     | R01_cb8386_c1/f2p0/2386  | R01_cb8386_c1/f2p0/2386     | R01_cb8386_c1/f2p0/2386     | R01_cb8386_c1/f2p0/2386     |
| R01_cb2804_c55/f2p0/3404    | NA                       | R01_cb2804_c55/f2p0/3404    | NA                          | NA                          |
| R01_cb6906_c4/flp1/4786     | NA                       | NA                          | R01_cb6906_c4/flp1/4786     | R01_cb6906_c4/flp1/4786     |
| R01_cb4117_c4/flp0/3360     | NA                       | NA                          | NA                          | R01_cb4117_c4/flp0/3360     |
| R01_cb18409_c42/flp0/968    | NA                       | NA                          | NA                          | R01_cb18409_c42/flp0/968    |
| R01_cb14799_c2/f2p1/1119    | R01_cb14799_c2/f2p1/1119 | R01_cb14799_c2/f2p1/1119    | NA                          | NA                          |

|                             |                             |                             |                             |                             |
|-----------------------------|-----------------------------|-----------------------------|-----------------------------|-----------------------------|
| R01_cb5753_c16/f1p1/2807    | NA                          | R01_cb5753_c16/f1p1/2807    | NA                          | NA                          |
| R01_cb8710_c14/f1p0/3389    | NA                          | NA                          | NA                          | R01_cb8710_c14/f1p0/3389    |
| R01_cb16545_c2/f1p0/349     | R01_cb16545_c2/f1p0/349     | R01_cb16545_c2/f1p0/349     | R01_cb16545_c2/f1p0/349     | R01_cb16545_c2/f1p0/349     |
| R01_cb7334_c6/f1p0/2961     | NA                          | NA                          | NA                          | R01_cb7334_c6/f1p0/2961     |
| R01_cb18409_c20/f3p0/496    | R01_cb18409_c20/f3p0/496    | R01_cb18409_c20/f3p0/496    | R01_cb18409_c20/f3p0/496    | R01_cb18409_c20/f3p0/496    |
| R01_cb17900_c0/f2p0/693     | NA                          | NA                          | NA                          | R01_cb17900_c0/f2p0/693     |
| R01_cb352_c0/f3p0/1755      | NA                          | NA                          | NA                          | R01_cb352_c0/f3p0/1755      |
| R01_cb16913_c6/f1p0/1025    | NA                          | R01_cb16913_c6/f1p0/1025    | NA                          | NA                          |
| R01_cb8564_c73010/f2p0/3305 | NA                          | R01_cb8564_c73010/f2p0/3305 | R01_cb8564_c73010/f2p0/3305 | R01_cb8564_c73010/f2p0/3305 |
| R01_cb14921_c2/f1p0/1206    | NA                          | NA                          | NA                          | R01_cb14921_c2/f1p0/1206    |
| R01_cb15134_c18/f1p0/1662   | NA                          | NA                          | NA                          | R01_cb15134_c18/f1p0/1662   |
| R01_cb6601_c1/f1p0/2811     | NA                          | R01_cb6601_c1/f1p0/2811     | NA                          | NA                          |
| R01_cb4529_c9/f1p0/780      | NA                          | R01_cb4529_c9/f1p0/780      | NA                          | NA                          |
| R01_cb8116_c0/f3p0/685      | NA                          | R01_cb8116_c0/f3p0/685      | R01_cb8116_c0/f3p0/685      | R01_cb8116_c0/f3p0/685      |
| R01_cb7108_c4/f1p0/2695     | NA                          | NA                          | NA                          | R01_cb7108_c4/f1p0/2695     |
| R01_cb2037_c10/f1p0/3646    | NA                          | R01_cb2037_c10/f1p0/3646    | NA                          | NA                          |
| R01_cb8564_c3700/f1p0/2899  | NA                          | NA                          | R01_cb8564_c3700/f1p0/2899  | R01_cb8564_c3700/f1p0/2899  |
| R01_cb17905_c0/f2p0/302     | R01_cb17905_c0/f2p0/302     | R01_cb17905_c0/f2p0/302     | R01_cb17905_c0/f2p0/302     | R01_cb17905_c0/f2p0/302     |
| R01_cb8564_c76328/f1p0/2005 | NA                          | R01_cb8564_c76328/f1p0/2005 | NA                          | NA                          |
| R01_cb8564_c125315/f1p0/208 | R01_cb8564_c125315/f1p0/208 | R01_cb8564_c125315/f1p0/208 | NA                          | NA                          |
| 5                           | 85                          | 5                           | NA                          | NA                          |
| R01_cb16387_c12/f2p0/1709   | NA                          | NA                          | NA                          | R01_cb16387_c12/f2p0/1709   |
| R01_cb18695_c0/f1p0/5329    | NA                          | R01_cb18695_c0/f1p0/5329    | NA                          | NA                          |
| R01_cb9533_c3/f1p0/3715     | NA                          | R01_cb9533_c3/f1p0/3715     | NA                          | NA                          |
| R01_cb12321_c823/f1p0/631   | NA                          | R01_cb12321_c823/f1p0/631   | NA                          | NA                          |
| R01_cb17_c15/f1p0/2470      | NA                          | NA                          | NA                          | R01_cb17_c15/f1p0/2470      |

|                              |                           |                              |                             |                              |
|------------------------------|---------------------------|------------------------------|-----------------------------|------------------------------|
| R01_cb13442_c0/f5p0/785      | NA                        | NA                           | NA                          | R01_cb13442_c0/f5p0/785      |
| R01_cb4734_c1/flp0/2986      | NA                        | R01_cb4734_c1/flp0/2986      | R01_cb4734_c1/flp0/2986     | R01_cb4734_c1/flp0/2986      |
| R01_cb18456_c5726/flp7/798   | NA                        | R01_cb18456_c5726/flp7/798   | NA                          | NA                           |
| R01_cb7380_c1/flp0/2467      | R01_cb7380_c1/flp0/2467   | R01_cb7380_c1/flp0/2467      | NA                          | R01_cb7380_c1/flp0/2467      |
| R01_cb18132_c1/flp0/1345     | R01_cb18132_c1/flp0/1345  | R01_cb18132_c1/flp0/1345     | R01_cb18132_c1/flp0/1345    | NA                           |
| R01_cb1594_c11/flp0/2163     | NA                        | NA                           | NA                          | R01_cb1594_c11/flp0/2163     |
| R01_cb13545_c43/flp0/755     | NA                        | R01_cb13545_c43/flp0/755     | R01_cb13545_c43/flp0/755    | R01_cb13545_c43/flp0/755     |
| R01_cb10696_c2/flp0/3298     | R01_cb10696_c2/flp0/3298  | R01_cb10696_c2/flp0/3298     | R01_cb10696_c2/flp0/3298    | R01_cb10696_c2/flp0/3298     |
| R01_cb12603_c19/flp0/643     | R01_cb12603_c19/flp0/643  | R01_cb12603_c19/flp0/643     | R01_cb12603_c19/flp0/643    | R01_cb12603_c19/flp0/643     |
| R01_cb8564_c25380/flp0/3874  | NA                        | R01_cb8564_c25380/flp0/3874  | NA                          | NA                           |
| R01_cb8564_c24078/flp1/3014  | NA                        | R01_cb8564_c24078/flp1/3014  | R01_cb8564_c24078/flp1/3014 | R01_cb8564_c24078/flp1/3014  |
| R01_cb6802_c15/flp0/2731     | NA                        | R01_cb6802_c15/flp0/2731     | NA                          | NA                           |
| R01_cb5364_c4/flp0/3115      | NA                        | R01_cb5364_c4/flp0/3115      | NA                          | NA                           |
| R01_cb7596_c4/flp0/2132      | NA                        | R01_cb7596_c4/flp0/2132      | R01_cb7596_c4/flp0/2132     | R01_cb7596_c4/flp0/2132      |
| R01_cb8564_c4202/flp0/2116   | NA                        | R01_cb8564_c4202/flp0/2116   | R01_cb8564_c4202/flp0/2116  | R01_cb8564_c4202/flp0/2116   |
| R01_cb8564_c902/f2p0/2353    | R01_cb8564_c902/f2p0/2353 | R01_cb8564_c902/f2p0/2353    | R01_cb8564_c902/f2p0/2353   | R01_cb8564_c902/f2p0/2353    |
| R01_cb16823_c0/f2p0/1305     | NA                        | NA                           | NA                          | R01_cb16823_c0/f2p0/1305     |
| R01_cb18502_c0/f2p0/470      | NA                        | R01_cb18502_c0/f2p0/470      | R01_cb18502_c0/f2p0/470     | R01_cb18502_c0/f2p0/470      |
| R01_cb14920_c1/flp0/675      | NA                        | R01_cb14920_c1/flp0/675      | NA                          | NA                           |
| R01_cb8564_c112921/flp0/1978 | NA                        | R01_cb8564_c112921/flp0/1978 | NA                          | R01_cb8564_c112921/flp0/1978 |
| R01_cb8564_c13713/flp1/3756  | NA                        | R01_cb8564_c13713/flp1/3756  | R01_cb8564_c13713/flp1/3756 | NA                           |
| R01_cb4469_c10/flp0/2911     | NA                        | NA                           | NA                          | R01_cb4469_c10/flp0/2911     |
| R01_cb3500_c17/flp0/2620     | NA                        | NA                           | NA                          | R01_cb3500_c17/flp0/2620     |
| R01_cb15337_c4/flp0/1562     | NA                        | NA                           | NA                          | R01_cb15337_c4/flp0/1562     |
| R01_cb1658_c11/flp0/3913     | NA                        | NA                           | NA                          | R01_cb1658_c11/flp0/3913     |

|                             |                            |                             |                            |                             |
|-----------------------------|----------------------------|-----------------------------|----------------------------|-----------------------------|
| R01_cb6024_c8/flp0/1159     | NA                         | R01_cb6024_c8/flp0/1159     | NA                         | NA                          |
| R01_cb2870_c12/flp0/2612    | NA                         | NA                          | NA                         | R01_cb2870_c12/flp0/2612    |
| R01_cb15537_c8/flp0/701     | NA                         | R01_cb15537_c8/flp0/701     | NA                         | R01_cb15537_c8/flp0/701     |
| R01_cb4131_c13/flp0/849     | NA                         | NA                          | NA                         | R01_cb4131_c13/flp0/849     |
| R01_cb6158_c3/flp0/798      | NA                         | NA                          | NA                         | R01_cb6158_c3/flp0/798      |
| R01_cb14664_c3/flp0/1551    | NA                         | R01_cb14664_c3/flp0/1551    | NA                         | NA                          |
| R01_cb12628_c0/f2p0/1203    | NA                         | NA                          | NA                         | R01_cb12628_c0/f2p0/1203    |
| R01_cb16578_c0/flp0/607     | R01_cb16578_c0/flp0/607    | R01_cb16578_c0/flp0/607     | R01_cb16578_c0/flp0/607    | R01_cb16578_c0/flp0/607     |
| R01_cb15904_c2/flp0/571     | NA                         | R01_cb15904_c2/flp0/571     | R01_cb15904_c2/flp0/571    | R01_cb15904_c2/flp0/571     |
| R01_cb8564_c4628/flp0/3073  | NA                         | R01_cb8564_c4628/flp0/3073  | R01_cb8564_c4628/flp0/3073 | R01_cb8564_c4628/flp0/3073  |
| R01_cb4352_c0/f4p0/2496     | NA                         | NA                          | NA                         | R01_cb4352_c0/f4p0/2496     |
| R01_cb6348_c0/f5p0/1740     | NA                         | NA                          | NA                         | R01_cb6348_c0/f5p0/1740     |
| R01_cb14253_c17/flp0/896    | R01_cb14253_c17/flp0/896   | R01_cb14253_c17/flp0/896    | NA                         | NA                          |
| R01_cb6393_c5/flp0/2217     | NA                         | NA                          | NA                         | R01_cb6393_c5/flp0/2217     |
| R01_cb18456_c7594/flp0/1061 | NA                         | R01_cb18456_c7594/flp0/1061 | NA                         | NA                          |
| R01_cb11174_c0/f5p0/1491    | NA                         | R01_cb11174_c0/f5p0/1491    | NA                         | NA                          |
| R01_cb10339_c3/flp0/2245    | NA                         | NA                          | NA                         | R01_cb10339_c3/flp0/2245    |
| R01_cb8824_c3/flp0/1749     | NA                         | R01_cb8824_c3/flp0/1749     | NA                         | NA                          |
| R01_cb9448_c0/f7p1/1767     | NA                         | NA                          | NA                         | R01_cb9448_c0/f7p1/1767     |
| R01_cb3430_c0/flp0/3618     | NA                         | R01_cb3430_c0/flp0/3618     | R01_cb3430_c0/flp0/3618    | R01_cb3430_c0/flp0/3618     |
| R01_cb6216_c3/flp0/2363     | NA                         | NA                          | NA                         | R01_cb6216_c3/flp0/2363     |
| R01_cb8232_c1/flp1/2570     | NA                         | R01_cb8232_c1/flp1/2570     | R01_cb8232_c1/flp1/2570    | NA                          |
| R01_cb14228_c10/flp0/625    | NA                         | NA                          | NA                         | R01_cb14228_c10/flp0/625    |
| R01_cb6602_c44/flp2/3121    | NA                         | NA                          | NA                         | R01_cb6602_c44/flp2/3121    |
| R01_cb16368_c1/flp0/914     | R01_cb16368_c1/flp0/914    | R01_cb16368_c1/flp0/914     | R01_cb16368_c1/flp0/914    | R01_cb16368_c1/flp0/914     |
| R01_cb8564_c14664/flp0/3045 | R01_cb8564_c14664/flp0/304 | R01_cb8564_c14664/flp0/3045 | NA                         | R01_cb8564_c14664/flp0/3045 |

---

|                             |                          |                             |                            |                             |
|-----------------------------|--------------------------|-----------------------------|----------------------------|-----------------------------|
| R01_cb11757_c0/f1p0/1007    | R01_cb11757_c0/f1p0/1007 | R01_cb11757_c0/f1p0/1007    | R01_cb11757_c0/f1p0/1007   | R01_cb11757_c0/f1p0/1007    |
| R01_cb3573_c1/f1p0/2640     | NA                       | NA                          | NA                         | R01_cb3573_c1/f1p0/2640     |
| R01_cb17336_c1/f1p0/501     | NA                       | R01_cb17336_c1/f1p0/501     | R01_cb17336_c1/f1p0/501    | R01_cb17336_c1/f1p0/501     |
| R01_cb8564_c44706/f1p0/2375 | NA                       | R01_cb8564_c44706/f1p0/2375 | NA                         | R01_cb8564_c44706/f1p0/2375 |
| R01_cb5807_c1/f2p0/427      | NA                       | R01_cb5807_c1/f2p0/427      | R01_cb5807_c1/f2p0/427     | R01_cb5807_c1/f2p0/427      |
| R01_cb3564_c13/f1p0/1992    | NA                       | NA                          | NA                         | R01_cb3564_c13/f1p0/1992    |
| R01_cb454_c29/f1p0/3267     | NA                       | NA                          | NA                         | R01_cb454_c29/f1p0/3267     |
| R01_cb4917_c0/f1p0/3125     | NA                       | NA                          | NA                         | R01_cb4917_c0/f1p0/3125     |
| R01_cb917_c8/f1p0/2629      | NA                       | R01_cb917_c8/f1p0/2629      | NA                         | R01_cb917_c8/f1p0/2629      |
| R01_cb13390_c22/f1p0/419    | R01_cb13390_c22/f1p0/419 | R01_cb13390_c22/f1p0/419    | R01_cb13390_c22/f1p0/419   | R01_cb13390_c22/f1p0/419    |
| R01_cb7945_c1/f1p0/2283     | NA                       | R01_cb7945_c1/f1p0/2283     | NA                         | R01_cb7945_c1/f1p0/2283     |
| R01_cb6602_c50/f1p0/3164    | NA                       | NA                          | NA                         | R01_cb6602_c50/f1p0/3164    |
| R01_cb4784_c4/f1p0/3232     | NA                       | NA                          | NA                         | R01_cb4784_c4/f1p0/3232     |
| R01_cb10571_c1/f1p0/2782    | NA                       | R01_cb10571_c1/f1p0/2782    | NA                         | NA                          |
| R01_cb18456_c5799/f1p0/561  | NA                       | NA                          | R01_cb18456_c5799/f1p0/561 | R01_cb18456_c5799/f1p0/561  |
| R01_cb13488_c2/f1p0/744     | NA                       | NA                          | NA                         | R01_cb13488_c2/f1p0/744     |
| R01_cb4117_c8/f1p0/1672     | NA                       | NA                          | NA                         | R01_cb4117_c8/f1p0/1672     |
| R01_cb1864_c8/f1p0/1010     | NA                       | R01_cb1864_c8/f1p0/1010     | NA                         | R01_cb1864_c8/f1p0/1010     |
| R01_cb1333_c62/f1p0/3275    | NA                       | R01_cb1333_c62/f1p0/3275    | NA                         | NA                          |
| R01_cb11560_c0/f1p0/1218    | NA                       | NA                          | NA                         | R01_cb11560_c0/f1p0/1218    |
| R01_cb8564_c47787/f1p0/4152 | NA                       | NA                          | NA                         | R01_cb8564_c47787/f1p0/4152 |
| R01_cb5394_c2/f1p0/2758     | NA                       | NA                          | NA                         | R01_cb5394_c2/f1p0/2758     |
| R01_cb1283_c0/f1p0/4343     | NA                       | NA                          | NA                         | R01_cb1283_c0/f1p0/4343     |
| R01_cb2601_c7/f1p0/423      | R01_cb2601_c7/f1p0/423   | R01_cb2601_c7/f1p0/423      | R01_cb2601_c7/f1p0/423     | R01_cb2601_c7/f1p0/423      |
| R01_cb14152_c0/f4p0/790     | NA                       | NA                          | NA                         | R01_cb14152_c0/f4p0/790     |

---

|                             |                             |                             |                             |                             |
|-----------------------------|-----------------------------|-----------------------------|-----------------------------|-----------------------------|
| R01_cb8728_c2/flp0/2263     | NA                          | R01_cb8728_c2/flp0/2263     | NA                          | NA                          |
| R01_cb822_c31/flp0/6069     | NA                          | NA                          | NA                          | R01_cb822_c31/flp0/6069     |
| R01_cb5580_c1/flp0/3717     | NA                          | R01_cb5580_c1/flp0/3717     | R01_cb5580_c1/flp0/3717     | NA                          |
| R01_cb12644_c3/flp0/521     | NA                          | R01_cb12644_c3/flp0/521     | NA                          | NA                          |
| R01_cb13050_c0/flp0/1337    | NA                          | R01_cb13050_c0/flp0/1337    | NA                          | NA                          |
| R01_cb4243_c1/flp0/3383     | NA                          | R01_cb4243_c1/flp0/3383     | NA                          | NA                          |
| R01_cb13161_c22/flp0/1465   | NA                          | R01_cb13161_c22/flp0/1465   | R01_cb13161_c22/flp0/1465   | R01_cb13161_c22/flp0/1465   |
| R01_cb16564_c3/flp0/768     | R01_cb16564_c3/flp0/768     | R01_cb16564_c3/flp0/768     | R01_cb16564_c3/flp0/768     | R01_cb16564_c3/flp0/768     |
| R01_cb5234_c9/flp0/2515     | NA                          | NA                          | NA                          | R01_cb5234_c9/flp0/2515     |
| R01_cb8564_c87726/flp0/2795 | NA                          | R01_cb8564_c87726/flp0/2795 | NA                          | NA                          |
| R01_cb8564_c33774/f3p0/2387 | R01_cb8564_c33774/f3p0/2387 | R01_cb8564_c33774/f3p0/2387 | R01_cb8564_c33774/f3p0/2387 | R01_cb8564_c33774/f3p0/2387 |
| R01_cb4822_c2/flp0/495      | R01_cb4822_c2/flp0/495      | R01_cb4822_c2/flp0/495      | R01_cb4822_c2/flp0/495      | R01_cb4822_c2/flp0/495      |
| R01_cb8564_c21500/flp0/4129 | NA                          | R01_cb8564_c21500/flp0/4129 | NA                          | NA                          |
| R01_cb16296_c1/flp0/870     | NA                          | NA                          | R01_cb16296_c1/flp0/870     | R01_cb16296_c1/flp0/870     |
| R01_cb11128_c1/flp0/1599    | NA                          | R01_cb11128_c1/flp0/1599    | NA                          | R01_cb11128_c1/flp0/1599    |
| R01_cb3114_c2/flp1/3969     | NA                          | NA                          | NA                          | R01_cb3114_c2/flp1/3969     |
| R01_cb8564_c52791/flp0/4346 | NA                          | R01_cb8564_c52791/flp0/4346 | NA                          | NA                          |
| R01_cb2804_c144/flp0/2003   | NA                          | R01_cb2804_c144/flp0/2003   | R01_cb2804_c144/flp0/2003   | R01_cb2804_c144/flp0/2003   |
| R01_cb16018_c4/flp0/1417    | R01_cb16018_c4/flp0/1417    | R01_cb16018_c4/flp0/1417    | R01_cb16018_c4/flp0/1417    | R01_cb16018_c4/flp0/1417    |
| R01_cb7845_c0/flp0/2521     | NA                          | R01_cb7845_c0/flp0/2521     | NA                          | NA                          |
| R01_cb11429_c3/flp0/1331    | NA                          | NA                          | NA                          | R01_cb11429_c3/flp0/1331    |
| R01_cb11833_c1/flp0/1962    | R01_cb11833_c1/flp0/1962    | R01_cb11833_c1/flp0/1962    | R01_cb11833_c1/flp0/1962    | R01_cb11833_c1/flp0/1962    |
| R01_cb18456_c6444/flp0/646  | R01_cb18456_c6444/flp0/646  | R01_cb18456_c6444/flp0/646  | R01_cb18456_c6444/flp0/646  | R01_cb18456_c6444/flp0/646  |
| R01_cb11171_c0/flp0/1251    | NA                          | R01_cb11171_c0/flp0/1251    | NA                          | R01_cb11171_c0/flp0/1251    |
| R01_cb18456_c827/flp1/495   | R01_cb18456_c827/flp1/495   | R01_cb18456_c827/flp1/495   | R01_cb18456_c827/flp1/495   | R01_cb18456_c827/flp1/495   |

|                             |                             |                             |                             |                             |
|-----------------------------|-----------------------------|-----------------------------|-----------------------------|-----------------------------|
| R01_cb13525_c1/f1p0/898     | NA                          | R01_cb13525_c1/f1p0/898     | NA                          | NA                          |
| R01_cb494_c17/f1p0/423      | R01_cb494_c17/f1p0/423      | R01_cb494_c17/f1p0/423      | R01_cb494_c17/f1p0/423      | R01_cb494_c17/f1p0/423      |
| R01_cb14058_c0/f1p0/686     | NA                          | R01_cb14058_c0/f1p0/686     | NA                          | NA                          |
| R01_cb454_c40/f1p0/2415     | NA                          | NA                          | NA                          | R01_cb454_c40/f1p0/2415     |
| R01_cb8564_c51500/f1p0/2801 | NA                          | R01_cb8564_c51500/f1p0/2801 | NA                          | R01_cb8564_c51500/f1p0/2801 |
| R01_cb8564_c68292/f4p0/2395 | NA                          | R01_cb8564_c68292/f4p0/2395 | R01_cb8564_c68292/f4p0/2395 | R01_cb8564_c68292/f4p0/2395 |
| R01_cb391_c0/f1p0/4835      | NA                          | NA                          | NA                          | R01_cb391_c0/f1p0/4835      |
| R01_cb7228_c8/f1p0/3020     | NA                          | NA                          | NA                          | R01_cb7228_c8/f1p0/3020     |
| R01_cb18456_c1386/f6p0/556  | NA                          | R01_cb18456_c1386/f6p0/556  | R01_cb18456_c1386/f6p0/556  | R01_cb18456_c1386/f6p0/556  |
| R01_cb10843_c4/f1p0/1752    | R01_cb10843_c4/f1p0/1752    | R01_cb10843_c4/f1p0/1752    | R01_cb10843_c4/f1p0/1752    | R01_cb10843_c4/f1p0/1752    |
| R01_cb7064_c7/f1p0/3393     | NA                          | R01_cb7064_c7/f1p0/3393     | NA                          | NA                          |
| R01_cb3388_c13/f1p0/2298    | NA                          | R01_cb3388_c13/f1p0/2298    | NA                          | NA                          |
| R01_cb8564_c3280/f1p0/3250  | NA                          | R01_cb8564_c3280/f1p0/3250  | NA                          | R01_cb8564_c3280/f1p0/3250  |
| R01_cb8564_c13068/f2p0/4131 | NA                          | R01_cb8564_c13068/f2p0/4131 | NA                          | NA                          |
| R01_cb15128_c4/f1p0/1673    | NA                          | NA                          | NA                          | R01_cb15128_c4/f1p0/1673    |
| R01_cb10366_c5/f1p0/1573    | NA                          | NA                          | NA                          | R01_cb10366_c5/f1p0/1573    |
| R01_cb13345_c0/f9p0/1156    | NA                          | R01_cb13345_c0/f9p0/1156    | R01_cb13345_c0/f9p0/1156    | R01_cb13345_c0/f9p0/1156    |
| R01_cb18456_c7896/f2p0/344  | R01_cb18456_c7896/f2p0/344  | R01_cb18456_c7896/f2p0/344  | R01_cb18456_c7896/f2p0/344  | NA                          |
| R01_cb8564_c77197/f1p0/2222 | NA                          | NA                          | NA                          | R01_cb8564_c77197/f1p0/2222 |
| R01_cb10034_c77/f1p3/649    | NA                          | R01_cb10034_c77/f1p3/649    | NA                          | NA                          |
| R01_cb16574_c1/f1p0/1694    | NA                          | NA                          | NA                          | R01_cb16574_c1/f1p0/1694    |
| R01_cb9791_c1/f1p0/1861     | NA                          | R01_cb9791_c1/f1p0/1861     | NA                          | R01_cb9791_c1/f1p0/1861     |
| R01_cb8564_c119356/f1p0/228 | R01_cb8564_c119356/f1p0/228 | R01_cb8564_c119356/f1p0/228 | R01_cb8564_c119356/f1p0/228 | R01_cb8564_c119356/f1p0/228 |
| 0                           | 80                          | 0                           | 0                           | 0                           |
| R01_cb18456_c7430/f1p0/637  | NA                          | NA                          | R01_cb18456_c7430/f1p0/637  | R01_cb18456_c7430/f1p0/637  |
| R01_cb1945_c19/f1p1/4836    | NA                          | R01_cb1945_c19/f1p1/4836    | NA                          | NA                          |

|                                  |                                  |                                  |                                  |                                  |
|----------------------------------|----------------------------------|----------------------------------|----------------------------------|----------------------------------|
| R01_cb16251_c0/flp0/1418         | NA                               | R01_cb16251_c0/flp0/1418         | NA                               | NA                               |
| R01_cb2698_c4/flp0/1944          | NA                               | NA                               | NA                               | R01_cb2698_c4/flp0/1944          |
| R01_cb17861_c0/f3p1/1422         | NA                               | NA                               | NA                               | R01_cb17861_c0/f3p1/1422         |
| R01_cb11499_c0/flp0/1694         | NA                               | NA                               | NA                               | R01_cb11499_c0/flp0/1694         |
| R01_cb8944_c0/flp0/2225          | R01_cb8944_c0/flp0/2225          | R01_cb8944_c0/flp0/2225          | NA                               | NA                               |
| R01_cb8564_c145767/f2p0/228<br>2 | NA                               | R01_cb8564_c145767/f2p0/228<br>2 | R01_cb8564_c145767/f2p0/228<br>2 | R01_cb8564_c145767/f2p0/228<br>2 |
| R01_cb191_c14/flp0/5848          | NA                               | NA                               | NA                               | R01_cb191_c14/flp0/5848          |
| R01_cb5904_c25/f2p1/1382         | NA                               | R01_cb5904_c25/f2p1/1382         | NA                               | NA                               |
| R01_cb5950_c4/flp0/2590          | NA                               | NA                               | NA                               | R01_cb5950_c4/flp0/2590          |
| R01_cb16321_c2/flp0/1730         | R01_cb16321_c2/flp0/1730         | R01_cb16321_c2/flp0/1730         | NA                               | R01_cb16321_c2/flp0/1730         |
| R01_cb8564_c74524/flp0/3137      | NA                               | R01_cb8564_c74524/flp0/3137      | NA                               | NA                               |
| R01_cb8564_c21788/flp0/2347      | R01_cb8564_c21788/flp0/2347<br>7 | R01_cb8564_c21788/flp0/2347      | R01_cb8564_c21788/flp0/2347      | R01_cb8564_c21788/flp0/2347      |
| R01_cb5896_c20/flp0/2762         | NA                               | R01_cb5896_c20/flp0/2762         | NA                               | NA                               |
| R01_cb18542_c1/flp0/505          | NA                               | R01_cb18542_c1/flp0/505          | NA                               | NA                               |
| R01_cb5896_c133/flp0/2433        | NA                               | R01_cb5896_c133/flp0/2433        | NA                               | NA                               |
| R01_cb15782_c2/f2p0/1464         | NA                               | NA                               | NA                               | R01_cb15782_c2/f2p0/1464         |
| R01_cb2022_c9/flp1/2351          | NA                               | NA                               | NA                               | R01_cb2022_c9/flp1/2351          |
| R01_cb8261_c0/flp0/2416          | NA                               | R01_cb8261_c0/flp0/2416          | NA                               | NA                               |
| R01_cb6480_c2/flp1/2681          | NA                               | NA                               | NA                               | R01_cb6480_c2/flp1/2681          |
| R01_cb7773_c2/flp0/2538          | NA                               | R01_cb7773_c2/flp0/2538          | NA                               | R01_cb7773_c2/flp0/2538          |
| R01_cb16295_c0/flp0/1333         | NA                               | NA                               | NA                               | R01_cb16295_c0/flp0/1333         |
| R01_cb17744_c18/flp0/2301        | NA                               | NA                               | NA                               | R01_cb17744_c18/flp0/2301        |
| R01_cb18226_c1/flp0/1254         | R01_cb18226_c1/flp0/1254         | R01_cb18226_c1/flp0/1254         | R01_cb18226_c1/flp0/1254         | R01_cb18226_c1/flp0/1254         |
| R01_cb16094_c2/flp0/945          | NA                               | R01_cb16094_c2/flp0/945          | NA                               | R01_cb16094_c2/flp0/945          |



|                              |                             |                              |                              |                              |
|------------------------------|-----------------------------|------------------------------|------------------------------|------------------------------|
| R01_cb8564_c75478/flp0/3890  | R01_cb8564_c75478/flp0/3890 | R01_cb8564_c75478/flp0/3890  | R01_cb8564_c75478/flp0/3890  | R01_cb8564_c75478/flp0/3890  |
| R01_cb8564_c113838/flp0/2481 | NA                          | NA                           | R01_cb8564_c113838/flp0/2481 | R01_cb8564_c113838/flp0/2481 |
| R01_cb8564_c116622/flp0/2948 | NA                          | R01_cb8564_c116622/flp0/2948 | NA                           | NA                           |
| R01_cb17266_c20/flp1/1365    | NA                          | R01_cb17266_c20/flp1/1365    | R01_cb17266_c20/flp1/1365    | R01_cb17266_c20/flp1/1365    |
| R01_cb2206_c3/flp1/3943      | NA                          | R01_cb2206_c3/flp1/3943      | NA                           | NA                           |
| R01_cb1333_c50/flp0/4810     | NA                          | R01_cb1333_c50/flp0/4810     | NA                           | NA                           |
| R01_cb16227_c2/flp0/821      | R01_cb16227_c2/flp0/821     | R01_cb16227_c2/flp0/821      | NA                           | NA                           |
| R01_cb18138_c0/flp0/397      | R01_cb18138_c0/flp0/397     | R01_cb18138_c0/flp0/397      | R01_cb18138_c0/flp0/397      | R01_cb18138_c0/flp0/397      |
| R01_cb10515_c5/flp0/570      | NA                          | R01_cb10515_c5/flp0/570      | NA                           | NA                           |
| R01_cb18128_c1/flp0/1328     | NA                          | NA                           | NA                           | R01_cb18128_c1/flp0/1328     |
| R01_cb3921_c5/flp0/1879      | NA                          | NA                           | NA                           | R01_cb3921_c5/flp0/1879      |
| R01_cb3582_c4/flp0/2583      | NA                          | R01_cb3582_c4/flp0/2583      | NA                           | R01_cb3582_c4/flp0/2583      |
| R01_cb10704_c8/flp0/671      | R01_cb10704_c8/flp0/671     | R01_cb10704_c8/flp0/671      | R01_cb10704_c8/flp0/671      | R01_cb10704_c8/flp0/671      |
| R01_cb8564_c83190/flp1/3641  | NA                          | R01_cb8564_c83190/flp1/3641  | NA                           | NA                           |
| R01_cb5139_c15/flp0/3114     | NA                          | NA                           | NA                           | R01_cb5139_c15/flp0/3114     |
| R01_cb8564_c39850/flp0/1894  | NA                          | R01_cb8564_c39850/flp0/1894  | R01_cb8564_c39850/flp0/1894  | R01_cb8564_c39850/flp0/1894  |
| R01_cb8564_c4637/flp0/2556   | NA                          | R01_cb8564_c4637/flp0/2556   | NA                           | NA                           |
| R01_cb13682_c3/flp0/914      | R01_cb13682_c3/flp0/914     | R01_cb13682_c3/flp0/914      | NA                           | R01_cb13682_c3/flp0/914      |
| R01_cb8456_c157/flp0/587     | NA                          | R01_cb8456_c157/flp0/587     | NA                           | NA                           |
| R01_cb12314_c5/flp0/578      | NA                          | NA                           | R01_cb12314_c5/flp0/578      | NA                           |
| R01_cb2425_c7/flp0/1904      | NA                          | NA                           | NA                           | R01_cb2425_c7/flp0/1904      |
| R01_cb10388_c4/flp0/1270     | NA                          | NA                           | R01_cb10388_c4/flp0/1270     | NA                           |
| R01_cb454_c27/flp0/2557      | NA                          | NA                           | NA                           | R01_cb454_c27/flp0/2557      |

|                             |                          |                             |                             |                             |
|-----------------------------|--------------------------|-----------------------------|-----------------------------|-----------------------------|
| R01_cb4809_c12/flp0/5024    | NA                       | R01_cb4809_c12/flp0/5024    | NA                          | R01_cb4809_c12/flp0/5024    |
| R01_cb7219_c19/f2p3/2439    | NA                       | NA                          | NA                          | R01_cb7219_c19/f2p3/2439    |
| R01_cb12896_c2/flp0/1485    | R01_cb12896_c2/flp0/1485 | R01_cb12896_c2/flp0/1485    | R01_cb12896_c2/flp0/1485    | R01_cb12896_c2/flp0/1485    |
| R01_cb11321_c3/flp0/1327    | NA                       | NA                          | NA                          | R01_cb11321_c3/flp0/1327    |
| R01_cb6299_c1/flp0/2896     | NA                       | R01_cb6299_c1/flp0/2896     | NA                          | NA                          |
| R01_cb16125_c14/flp0/1582   | NA                       | R01_cb16125_c14/flp0/1582   | NA                          | R01_cb16125_c14/flp0/1582   |
| R01_cb6938_c1/flp0/2232     | NA                       | R01_cb6938_c1/flp0/2232     | NA                          | R01_cb6938_c1/flp0/2232     |
| R01_cb12480_c16/flp0/835    | NA                       | R01_cb12480_c16/flp0/835    | R01_cb12480_c16/flp0/835    | R01_cb12480_c16/flp0/835    |
| R01_cb17130_c0/flp0/733     | R01_cb17130_c0/flp0/733  | R01_cb17130_c0/flp0/733     | R01_cb17130_c0/flp0/733     | R01_cb17130_c0/flp0/733     |
| R01_cb6057_c2/flp0/2077     | NA                       | NA                          | NA                          | R01_cb6057_c2/flp0/2077     |
| R01_cb14587_c0/flp0/780     | NA                       | R01_cb14587_c0/flp0/780     | NA                          | R01_cb14587_c0/flp0/780     |
| R01_cb8564_c43422/flp0/2948 | NA                       | R01_cb8564_c43422/flp0/2948 | R01_cb8564_c43422/flp0/2948 | R01_cb8564_c43422/flp0/2948 |
| R01_cb4581_c12/flp0/2085    | NA                       | R01_cb4581_c12/flp0/2085    | R01_cb4581_c12/flp0/2085    | NA                          |
| R01_cb14937_c3/flp0/916     | NA                       | NA                          | R01_cb14937_c3/flp0/916     | R01_cb14937_c3/flp0/916     |
| R01_cb12024_c7/flp0/1003    | NA                       | NA                          | NA                          | R01_cb12024_c7/flp0/1003    |
| R01_cb1626_c14/flp0/2173    | NA                       | NA                          | NA                          | R01_cb1626_c14/flp0/2173    |
| R01_cb14_c28/flp0/3251      | NA                       | R01_cb14_c28/flp0/3251      | NA                          | NA                          |
| R01_cb402_c19/flp0/2579     | NA                       | NA                          | NA                          | R01_cb402_c19/flp0/2579     |
| R01_cb12785_c37/f2p1/929    | NA                       | NA                          | R01_cb12785_c37/f2p1/929    | NA                          |
| R01_cb326_c5/flp0/2325      | NA                       | NA                          | NA                          | R01_cb326_c5/flp0/2325      |
| R01_cb12096_c1/flp0/1130    | NA                       | R01_cb12096_c1/flp0/1130    | R01_cb12096_c1/flp0/1130    | R01_cb12096_c1/flp0/1130    |
| R01_cb7528_c3/flp0/1980     | R01_cb7528_c3/flp0/1980  | R01_cb7528_c3/flp0/1980     | R01_cb7528_c3/flp0/1980     | R01_cb7528_c3/flp0/1980     |
| R01_cb10293_c10/flp0/1244   | NA                       | R01_cb10293_c10/flp0/1244   | NA                          | NA                          |
| R01_cb4489_c19/f2p0/1037    | NA                       | R01_cb4489_c19/f2p0/1037    | NA                          | NA                          |
| R01_cb14816_c9/flp0/575     | R01_cb14816_c9/flp0/575  | R01_cb14816_c9/flp0/575     | R01_cb14816_c9/flp0/575     | R01_cb14816_c9/flp0/575     |
| R01_cb4866_c8/flp1/2481     | NA                       | NA                          | NA                          | R01_cb4866_c8/flp1/2481     |

|                              |                              |                              |                              |                              |
|------------------------------|------------------------------|------------------------------|------------------------------|------------------------------|
| R01_cb3716_c4/flp0/3546      | NA                           | NA                           | NA                           | R01_cb3716_c4/flp0/3546      |
| R01_cb6158_c1/flp0/2514      | R01_cb6158_c1/flp0/2514      | R01_cb6158_c1/flp0/2514      | NA                           | R01_cb6158_c1/flp0/2514      |
| R01_cb18525_c1/flp0/522      | R01_cb18525_c1/flp0/522      | R01_cb18525_c1/flp0/522      | R01_cb18525_c1/flp0/522      | R01_cb18525_c1/flp0/522      |
| R01_cb3500_c23/flp0/3788     | NA                           | NA                           | NA                           | R01_cb3500_c23/flp0/3788     |
| R01_cb8564_c3957/flp0/2652   | NA                           | NA                           | NA                           | R01_cb8564_c3957/flp0/2652   |
| R01_cb15537_c3/flp0/608      | R01_cb15537_c3/flp0/608      | R01_cb15537_c3/flp0/608      | R01_cb15537_c3/flp0/608      | R01_cb15537_c3/flp0/608      |
| R01_cb1614_c24/flp0/452      | R01_cb1614_c24/flp0/452      | R01_cb1614_c24/flp0/452      | NA                           | R01_cb1614_c24/flp0/452      |
| R01_cb875_c4/flp0/2945       | NA                           | NA                           | NA                           | R01_cb875_c4/flp0/2945       |
| R01_cb4016_c47/flp0/1965     | R01_cb4016_c47/flp0/1965     | R01_cb4016_c47/flp0/1965     | R01_cb4016_c47/flp0/1965     | R01_cb4016_c47/flp0/1965     |
| R01_cb7258_c5/flp0/1369      | NA                           | R01_cb7258_c5/flp0/1369      | R01_cb7258_c5/flp0/1369      | NA                           |
| R01_cb5807_c2/flp0/3003      | NA                           | R01_cb5807_c2/flp0/3003      | NA                           | R01_cb5807_c2/flp0/3003      |
| R01_cb11530_c1/flp0/3901     | NA                           | R01_cb11530_c1/flp0/3901     | NA                           | NA                           |
| R01_cb12301_c74/flp0/750     | NA                           | R01_cb12301_c74/flp0/750     | NA                           | NA                           |
| R01_cb16256_c0/flp0/1266     | NA                           | R01_cb16256_c0/flp0/1266     | NA                           | NA                           |
| R01_cb5672_c29/flp0/1142     | NA                           | R01_cb5672_c29/flp0/1142     | R01_cb5672_c29/flp0/1142     | R01_cb5672_c29/flp0/1142     |
| R01_cb1138_c51/flp1/1003     | NA                           | NA                           | R01_cb1138_c51/flp1/1003     | R01_cb1138_c51/flp1/1003     |
| R01_cb7499_c2/flp0/2333      | R01_cb7499_c2/flp0/2333      | NA                           | NA                           | NA                           |
| R01_cb1353_c2/flp1/1576      | NA                           | R01_cb1353_c2/flp1/1576      | NA                           | NA                           |
| R01_cb8564_c124097/flp0/2107 | R01_cb8564_c124097/flp0/2107 | R01_cb8564_c124097/flp0/2107 | R01_cb8564_c124097/flp0/2107 | R01_cb8564_c124097/flp0/2107 |
| R01_cb8564_c86997/flp0/2960  | NA                           | R01_cb8564_c86997/flp0/2960  | NA                           | NA                           |
| R01_cb8564_c10051/f3p1/3001  | NA                           | NA                           | NA                           | R01_cb8564_c10051/f3p1/3001  |
| R01_cb13364_c1/flp2/1348     | NA                           | R01_cb13364_c1/flp2/1348     | NA                           | NA                           |
| R01_cb3006_c6/flp1/1782      | NA                           | NA                           | NA                           | R01_cb3006_c6/flp1/1782      |
| R01_cb12490_c12/flp0/1008    | NA                           | R01_cb12490_c12/flp0/1008    | NA                           | NA                           |
| R01_cb16657_c1/flp0/747      | NA                           | R01_cb16657_c1/flp0/747      | NA                           | R01_cb16657_c1/flp0/747      |

|                             |                             |                             |                             |                             |
|-----------------------------|-----------------------------|-----------------------------|-----------------------------|-----------------------------|
| R01_cb9116_c8/flp1/3762     | NA                          | R01_cb9116_c8/flp1/3762     | NA                          | NA                          |
| R01_cb8349_c36/flp0/2219    | NA                          | R01_cb8349_c36/flp0/2219    | NA                          | NA                          |
| R01_cb6735_c7/flp0/1986     | NA                          | R01_cb6735_c7/flp0/1986     | NA                          | NA                          |
| R01_cb8564_c88021/flp0/3390 | NA                          | NA                          | NA                          | R01_cb8564_c88021/flp0/3390 |
| R01_cb8564_c128337/flp0/210 | NA                          | R01_cb8564_c128337/flp0/210 | NA                          | R01_cb8564_c128337/flp0/210 |
| 2                           |                             | 2                           |                             | 2                           |
| R01_cb5248_c15/flp1/3624    | NA                          | R01_cb5248_c15/flp1/3624    | NA                          | R01_cb5248_c15/flp1/3624    |
| R01_cb4923_c4/flp0/2860     | NA                          | NA                          | NA                          | R01_cb4923_c4/flp0/2860     |
| R01_cb18455_c1/flp0/1452    | NA                          | R01_cb18455_c1/flp0/1452    | NA                          | R01_cb18455_c1/flp0/1452    |
| R01_cb8564_c117310/flp0/244 | NA                          | R01_cb8564_c117310/flp0/244 | R01_cb8564_c117310/flp0/244 | NA                          |
| 4                           |                             | 4                           | 4                           |                             |
| R01_cb8564_c121879/flp0/293 | R01_cb8564_c121879/flp0/293 | R01_cb8564_c121879/flp0/293 | NA                          | R01_cb8564_c121879/flp0/293 |
| 5                           | 35                          | 5                           |                             | 5                           |
| R01_cb15701_c8/flp0/1532    | NA                          | R01_cb15701_c8/flp0/1532    | NA                          | NA                          |
| R01_cb13427_c1/flp0/875     | NA                          | NA                          | NA                          | R01_cb13427_c1/flp0/875     |
| R01_cb16141_c1/flp0/1546    | R01_cb16141_c1/flp0/1546    | R01_cb16141_c1/flp0/1546    | R01_cb16141_c1/flp0/1546    | R01_cb16141_c1/flp0/1546    |
| R01_cb17887_c0/flp0/1156    | NA                          | NA                          | NA                          | R01_cb17887_c0/flp0/1156    |
| R01_cb9380_c4/flp0/2049     | NA                          | NA                          | NA                          | R01_cb9380_c4/flp0/2049     |
| R01_cb17704_c2/flp0/1116    | NA                          | R01_cb17704_c2/flp0/1116    | NA                          | NA                          |
| R01_cb8564_c92063/flp0/2144 | R01_cb8564_c92063/flp0/2144 | R01_cb8564_c92063/flp0/2144 | R01_cb8564_c92063/flp0/2144 | R01_cb8564_c92063/flp0/2144 |
| 4                           |                             | 4                           |                             |                             |
| R01_cb18132_c23/flp0/1186   | NA                          | R01_cb18132_c23/flp0/1186   | NA                          | NA                          |
| R01_cb2104_c7/flp0/2209     | NA                          | R01_cb2104_c7/flp0/2209     | R01_cb2104_c7/flp0/2209     | R01_cb2104_c7/flp0/2209     |
| R01_cb8564_c83927/flp0/3742 | NA                          | R01_cb8564_c83927/flp0/3742 | NA                          | NA                          |
| R01_cb18705_c0/flp0/6297    | NA                          | R01_cb18705_c0/flp0/6297    | NA                          | R01_cb18705_c0/flp0/6297    |
| R01_cb17918_c3/flp0/1349    | NA                          | NA                          | NA                          | R01_cb17918_c3/flp0/1349    |

|                                  |                           |                                  |                             |                                  |
|----------------------------------|---------------------------|----------------------------------|-----------------------------|----------------------------------|
| R01_cb18527_c0/flp0/1762         | NA                        | NA                               | NA                          | R01_cb18527_c0/flp0/1762         |
| R01_cb5807_c8/flp0/1053          | NA                        | R01_cb5807_c8/flp0/1053          | R01_cb5807_c8/flp0/1053     | R01_cb5807_c8/flp0/1053          |
| R01_cb17266_c16/flp0/1079        | R01_cb17266_c16/flp0/1079 | R01_cb17266_c16/flp0/1079        | NA                          | NA                               |
| R01_cb8564_c128459/flp0/211<br>2 | NA                        | R01_cb8564_c128459/flp0/211<br>2 | NA                          | R01_cb8564_c128459/flp0/211<br>2 |
| R01_cb17302_c1/flp0/1490         | NA                        | NA                               | NA                          | R01_cb17302_c1/flp0/1490         |
| R01_cb8564_c46177/flp0/1967      | NA                        | R01_cb8564_c46177/flp0/1967      | R01_cb8564_c46177/flp0/1967 | R01_cb8564_c46177/flp0/1967      |
| R01_cb7564_c36/flp0/1940         | NA                        | R01_cb7564_c36/flp0/1940         | NA                          | NA                               |
| R01_cb920_c3/flp1/4571           | NA                        | NA                               | NA                          | R01_cb920_c3/flp1/4571           |
| R01_cb15679_c1/flp0/1332         | NA                        | NA                               | NA                          | R01_cb15679_c1/flp0/1332         |
| R01_cb18650_c6/flp2/5458         | NA                        | NA                               | NA                          | R01_cb18650_c6/flp2/5458         |
| R01_cb8582_c2/flp0/1247          | NA                        | R01_cb8582_c2/flp0/1247          | NA                          | R01_cb8582_c2/flp0/1247          |
| R01_cb7333_c2/flp0/1087          | NA                        | R01_cb7333_c2/flp0/1087          | NA                          | R01_cb7333_c2/flp0/1087          |
| R01_cb6141_c0/f4p0/709           | NA                        | R01_cb6141_c0/f4p0/709           | NA                          | NA                               |
| R01_cb14205_c1/f3p0/1864         | NA                        | R01_cb14205_c1/f3p0/1864         | NA                          | NA                               |
| R01_cb12504_c5/flp0/984          | NA                        | R01_cb12504_c5/flp0/984          | NA                          | R01_cb12504_c5/flp0/984          |
| R01_cb5900_c136/flp0/2285        | NA                        | R01_cb5900_c136/flp0/2285        | NA                          | R01_cb5900_c136/flp0/2285        |
| R01_cb17786_c2/flp1/514          | NA                        | R01_cb17786_c2/flp1/514          | NA                          | R01_cb17786_c2/flp1/514          |
| R01_cb6615_c1/f4p0/1383          | NA                        | NA                               | NA                          | R01_cb6615_c1/f4p0/1383          |
| R01_cb12722_c10/flp0/1359        | NA                        | NA                               | NA                          | R01_cb12722_c10/flp0/1359        |
| R01_cb3699_c20/flp0/2136         | NA                        | R01_cb3699_c20/flp0/2136         | NA                          | NA                               |
| R01_cb17122_c1/flp0/843          | NA                        | R01_cb17122_c1/flp0/843          | NA                          | NA                               |
| R01_cb16199_c0/f2p0/837          | NA                        | R01_cb16199_c0/f2p0/837          | R01_cb16199_c0/f2p0/837     | R01_cb16199_c0/f2p0/837          |
| R01_cb18456_c4643/flp0/453       | NA                        | R01_cb18456_c4643/flp0/453       | NA                          | R01_cb18456_c4643/flp0/453       |
| R01_cb10817_c1/flp0/4352         | NA                        | NA                               | NA                          | R01_cb10817_c1/flp0/4352         |
| R01_cb15514_c2/flp0/5584         | NA                        | R01_cb15514_c2/flp0/5584         | R01_cb15514_c2/flp0/5584    | R01_cb15514_c2/flp0/5584         |

|                             |                             |                             |                             |                             |
|-----------------------------|-----------------------------|-----------------------------|-----------------------------|-----------------------------|
| R01_cb8564_c70941/flp1/2445 | NA                          | R01_cb8564_c70941/flp1/2445 | R01_cb8564_c70941/flp1/2445 | R01_cb8564_c70941/flp1/2445 |
| R01_cb14353_c2/flp0/1293    | NA                          | R01_cb14353_c2/flp0/1293    | R01_cb14353_c2/flp0/1293    | R01_cb14353_c2/flp0/1293    |
| R01_cb16148_c0/flp0/1697    | NA                          | R01_cb16148_c0/flp0/1697    | NA                          | NA                          |
| R01_cb2082_c10/flp0/3869    | NA                          | NA                          | NA                          | R01_cb2082_c10/flp0/3869    |
| R01_cb16953_c0/flp0/695     | NA                          | NA                          | R01_cb16953_c0/flp0/695     | R01_cb16953_c0/flp0/695     |
| R01_cb8564_c127488/flp0/291 | NA                          | R01_cb8564_c127488/flp0/291 | R01_cb8564_c127488/flp0/291 | R01_cb8564_c127488/flp0/291 |
| 3                           |                             | 3                           | 3                           | 3                           |
| R01_cb8564_c71606/flp0/2007 | NA                          | R01_cb8564_c71606/flp0/2007 | NA                          | R01_cb8564_c71606/flp0/2007 |
| R01_cb15712_c2/flp0/687     | NA                          | R01_cb15712_c2/flp0/687     | NA                          | R01_cb15712_c2/flp0/687     |
| R01_cb8564_c89497/flp0/3017 | R01_cb8564_c89497/flp0/3017 | R01_cb8564_c89497/flp0/3017 | R01_cb8564_c89497/flp0/3017 | R01_cb8564_c89497/flp0/3017 |
|                             | 7                           |                             |                             |                             |
| R01_cb7766_c6/flp0/3745     | R01_cb7766_c6/flp0/3745     | R01_cb7766_c6/flp0/3745     | NA                          | NA                          |
| R01_cb3359_c18/flp0/3573    | NA                          | R01_cb3359_c18/flp0/3573    | NA                          | NA                          |
| R01_cb12573_c16/flp0/747    | NA                          | R01_cb12573_c16/flp0/747    | R01_cb12573_c16/flp0/747    | NA                          |
| R01_cb13877_c2/flp0/1479    | NA                          | NA                          | NA                          | R01_cb13877_c2/flp0/1479    |
| R01_cb8515_c1/flp0/2347     | NA                          | R01_cb8515_c1/flp0/2347     | NA                          | NA                          |
| R01_cb17708_c0/flp0/1789    | NA                          | R01_cb17708_c0/flp0/1789    | R01_cb17708_c0/flp0/1789    | NA                          |
| R01_cb11099_c0/f3p0/1823    | NA                          | NA                          | NA                          | R01_cb11099_c0/f3p0/1823    |
| R01_cb16526_c3/flp0/847     | NA                          | NA                          | R01_cb16526_c3/flp0/847     | R01_cb16526_c3/flp0/847     |
| R01_cb16206_c0/f2p0/1413    | NA                          | NA                          | NA                          | R01_cb16206_c0/f2p0/1413    |
| R01_cb3087_c9/flp0/4385     | NA                          | NA                          | NA                          | R01_cb3087_c9/flp0/4385     |
| R01_cb218_c2/f2p0/4554      | NA                          | NA                          | NA                          | R01_cb218_c2/f2p0/4554      |
| R01_cb8982_c2/f3p0/2160     | NA                          | NA                          | NA                          | R01_cb8982_c2/f3p0/2160     |
| R01_cb13386_c22/flp0/1071   | NA                          | R01_cb13386_c22/flp0/1071   | NA                          | NA                          |
| R01_cb8564_c118550/flp0/395 | NA                          | R01_cb8564_c118550/flp0/395 | NA                          | NA                          |
| 9                           |                             | 9                           |                             |                             |

|                              |                             |                             |                             |                              |
|------------------------------|-----------------------------|-----------------------------|-----------------------------|------------------------------|
| R01_cb12573_c10/flp0/646     | NA                          | NA                          | NA                          | R01_cb12573_c10/flp0/646     |
| R01_cb11176_c2/flp0/2534     | R01_cb11176_c2/flp0/2534    | R01_cb11176_c2/flp0/2534    | R01_cb11176_c2/flp0/2534    | R01_cb11176_c2/flp0/2534     |
| R01_cb8030_c7/f4p0/2422      | NA                          | NA                          | NA                          | R01_cb8030_c7/f4p0/2422      |
| R01_cb18456_c7296/flp0/410   | R01_cb18456_c7296/flp0/410  | R01_cb18456_c7296/flp0/410  | R01_cb18456_c7296/flp0/410  | R01_cb18456_c7296/flp0/410   |
| R01_cb8564_c126964/flp0/2909 | NA                          | NA                          | NA                          | R01_cb8564_c126964/flp0/2909 |
| R01_cb8564_c87268/flp0/3745  | NA                          | R01_cb8564_c87268/flp0/3745 | NA                          | NA                           |
| R01_cb8564_c13752/flp0/4357  | NA                          | NA                          | NA                          | R01_cb8564_c13752/flp0/4357  |
| R01_cb2643_c11/flp1/3425     | NA                          | R01_cb2643_c11/flp1/3425    | NA                          | NA                           |
| R01_cb9357_c5/flp0/1681      | R01_cb9357_c5/flp0/1681     | R01_cb9357_c5/flp0/1681     | R01_cb9357_c5/flp0/1681     | R01_cb9357_c5/flp0/1681      |
| R01_cb8564_c37837/f2p0/2810  | NA                          | NA                          | R01_cb8564_c37837/f2p0/2810 | R01_cb8564_c37837/f2p0/2810  |
| R01_cb8564_c88494/flp1/2983  | NA                          | R01_cb8564_c88494/flp1/2983 | NA                          | NA                           |
| R01_cb8354_c14/flp0/5298     | NA                          | NA                          | NA                          | R01_cb8354_c14/flp0/5298     |
| R01_cb8564_c2619/flp0/2635   | R01_cb8564_c2619/flp0/2635  | R01_cb8564_c2619/flp0/2635  | NA                          | R01_cb8564_c2619/flp0/2635   |
| R01_cb9035_c3/flp1/2199      | NA                          | NA                          | NA                          | R01_cb9035_c3/flp1/2199      |
| R01_cb11603_c5/flp0/919      | NA                          | R01_cb11603_c5/flp0/919     | NA                          | NA                           |
| R01_cb16540_c1/fl0p0/721     | NA                          | NA                          | R01_cb16540_c1/fl0p0/721    | R01_cb16540_c1/fl0p0/721     |
| R01_cb12716_c0/f2p0/1491     | NA                          | NA                          | NA                          | R01_cb12716_c0/f2p0/1491     |
| R01_cb1425_c7/flp0/2088      | NA                          | NA                          | NA                          | R01_cb1425_c7/flp0/2088      |
| R01_cb14587_c1/flp0/865      | NA                          | R01_cb14587_c1/flp0/865     | NA                          | R01_cb14587_c1/flp0/865      |
| R01_cb6742_c8/flp0/2804      | NA                          | NA                          | NA                          | R01_cb6742_c8/flp0/2804      |
| R01_cb8564_c39123/flp1/3996  | R01_cb8564_c39123/flp1/3996 | R01_cb8564_c39123/flp1/3996 | R01_cb8564_c39123/flp1/3996 | R01_cb8564_c39123/flp1/3996  |
| R01_cb8564_c90564/flp0/2758  | NA                          | NA                          | NA                          | R01_cb8564_c90564/flp0/2758  |
| R01_cb10226_c2/flp0/816      | NA                          | R01_cb10226_c2/flp0/816     | R01_cb10226_c2/flp0/816     | R01_cb10226_c2/flp0/816      |
| R01_cb17266_c33/flp1/1372    | NA                          | R01_cb17266_c33/flp1/1372   | R01_cb17266_c33/flp1/1372   | R01_cb17266_c33/flp1/1372    |

|                              |                              |                              |                             |                              |
|------------------------------|------------------------------|------------------------------|-----------------------------|------------------------------|
| R01_cb17049_c0/f2p0/845      | NA                           | NA                           | NA                          | R01_cb17049_c0/f2p0/845      |
| R01_cb4352_c10/f1p0/2137     | NA                           | NA                           | NA                          | R01_cb4352_c10/f1p0/2137     |
| R01_cb15569_c0/f5p0/1464     | NA                           | NA                           | R01_cb15569_c0/f5p0/1464    | NA                           |
| R01_cb7501_c2/f1p0/2602      | NA                           | NA                           | NA                          | R01_cb7501_c2/f1p0/2602      |
| R01_cb8564_c89725/f1p1/3641  | NA                           | NA                           | NA                          | R01_cb8564_c89725/f1p1/3641  |
| R01_cb16920_c0/f1p0/523      | R01_cb16920_c0/f1p0/523      | R01_cb16920_c0/f1p0/523      | R01_cb16920_c0/f1p0/523     | R01_cb16920_c0/f1p0/523      |
| R01_cb11529_c1/f1p0/1940     | NA                           | R01_cb11529_c1/f1p0/1940     | NA                          | NA                           |
| R01_cb6456_c6/f1p0/979       | NA                           | NA                           | NA                          | R01_cb6456_c6/f1p0/979       |
| R01_cb8564_c116216/f1p0/4369 | R01_cb8564_c116216/f1p0/4369 | R01_cb8564_c116216/f1p0/4369 | NA                          | NA                           |
| R01_cb9970_c1/f1p0/3500      | NA                           | R01_cb9970_c1/f1p0/3500      | NA                          | NA                           |
| R01_cb3131_c0/f1p0/3713      | NA                           | R01_cb3131_c0/f1p0/3713      | NA                          | NA                           |
| R01_cb2213_c0/f1p0/3937      | NA                           | NA                           | NA                          | R01_cb2213_c0/f1p0/3937      |
| R01_cb4536_c4/f1p0/2190      | NA                           | R01_cb4536_c4/f1p0/2190      | NA                          | NA                           |
| R01_cb10376_c2/f1p0/1963     | NA                           | R01_cb10376_c2/f1p0/1963     | NA                          | NA                           |
| R01_cb15394_c2/f1p0/386      | R01_cb15394_c2/f1p0/386      | R01_cb15394_c2/f1p0/386      | R01_cb15394_c2/f1p0/386     | R01_cb15394_c2/f1p0/386      |
| R01_cb8564_c73456/f2p0/3436  | NA                           | R01_cb8564_c73456/f2p0/3436  | R01_cb8564_c73456/f2p0/3436 | R01_cb8564_c73456/f2p0/3436  |
| R01_cb18456_c1081/f2p3/622   | R01_cb18456_c1081/f2p3/622   | R01_cb18456_c1081/f2p3/622   | NA                          | NA                           |
| R01_cb8564_c111239/f1p0/3118 | NA                           | NA                           | NA                          | R01_cb8564_c111239/f1p0/3118 |
| R01_cb2423_c30/f1p0/2753     | NA                           | R01_cb2423_c30/f1p0/2753     | NA                          | NA                           |
| R01_cb11145_c0/f1p0/1407     | NA                           | R01_cb11145_c0/f1p0/1407     | NA                          | R01_cb11145_c0/f1p0/1407     |
| R01_cb8564_c84993/f1p0/2265  | NA                           | R01_cb8564_c84993/f1p0/2265  | NA                          | NA                           |
| R01_cb8564_c2587/f1p0/1997   | NA                           | R01_cb8564_c2587/f1p0/1997   | R01_cb8564_c2587/f1p0/1997  | NA                           |
| R01_cb17572_c3/f1p0/780      | NA                           | NA                           | NA                          | R01_cb17572_c3/f1p0/780      |
| R01_cb18456_c7190/f1p0/795   | R01_cb18456_c7190/f1p0/795   | R01_cb18456_c7190/f1p0/795   | R01_cb18456_c7190/f1p0/795  | R01_cb18456_c7190/f1p0/795   |



|                             |                            |                             |                             |                             |
|-----------------------------|----------------------------|-----------------------------|-----------------------------|-----------------------------|
| R01_cb3580_c24/flp0/3582    | NA                         | R01_cb3580_c24/flp0/3582    | NA                          | NA                          |
| R01_cb4352_c3/f2p0/2420     | NA                         | NA                          | NA                          | R01_cb4352_c3/f2p0/2420     |
| R01_cb16678_c8/flp0/1124    | NA                         | R01_cb16678_c8/flp0/1124    | R01_cb16678_c8/flp0/1124    | R01_cb16678_c8/flp0/1124    |
| R01_cb3376_c0/f3p0/1201     | NA                         | NA                          | NA                          | R01_cb3376_c0/f3p0/1201     |
| R01_cb12946_c6/flp0/402     | R01_cb12946_c6/flp0/402    | R01_cb12946_c6/flp0/402     | NA                          | R01_cb12946_c6/flp0/402     |
| R01_cb8564_c50202/flp0/2941 | NA                         | NA                          | NA                          | R01_cb8564_c50202/flp0/2941 |
| R01_cb8564_c2842/flp0/3509  | NA                         | R01_cb8564_c2842/flp0/3509  | NA                          | R01_cb8564_c2842/flp0/3509  |
| R01_cb18409_c49/flp0/379    | R01_cb18409_c49/flp0/379   | R01_cb18409_c49/flp0/379    | R01_cb18409_c49/flp0/379    | R01_cb18409_c49/flp0/379    |
| R01_cb12773_c1/flp0/1012    | NA                         | NA                          | NA                          | R01_cb12773_c1/flp0/1012    |
| R01_cb16678_c2/flp0/1364    | NA                         | R01_cb16678_c2/flp0/1364    | R01_cb16678_c2/flp0/1364    | R01_cb16678_c2/flp0/1364    |
| R01_cb8564_c92313/flp0/2936 | NA                         | R01_cb8564_c92313/flp0/2936 | NA                          | NA                          |
| R01_cb7151_c4/flp0/4007     | R01_cb7151_c4/flp0/4007    | R01_cb7151_c4/flp0/4007     | NA                          | R01_cb7151_c4/flp0/4007     |
| R01_cb11972_c6/flp0/665     | R01_cb11972_c6/flp0/665    | R01_cb11972_c6/flp0/665     | NA                          | R01_cb11972_c6/flp0/665     |
| R01_cb14044_c12/flp0/1698   | NA                         | R01_cb14044_c12/flp0/1698   | NA                          | NA                          |
| R01_cb2568_c3/flp0/2129     | NA                         | NA                          | R01_cb2568_c3/flp0/2129     | R01_cb2568_c3/flp0/2129     |
| R01_cb4501_c14/flp0/2920    | NA                         | NA                          | NA                          | R01_cb4501_c14/flp0/2920    |
| R01_cb8564_c11400/flp0/2922 | NA                         | R01_cb8564_c11400/flp0/2922 | NA                          | NA                          |
| R01_cb16959_c2/flp0/682     | NA                         | NA                          | NA                          | R01_cb16959_c2/flp0/682     |
| R01_cb18456_c7367/flp0/1228 | NA                         | NA                          | R01_cb18456_c7367/flp0/1228 | R01_cb18456_c7367/flp0/1228 |
| R01_cb8564_c74161/flp0/2239 | NA                         | R01_cb8564_c74161/flp0/2239 | NA                          | NA                          |
| R01_cb10787_c9/flp0/1232    | NA                         | R01_cb10787_c9/flp0/1232    | NA                          | R01_cb10787_c9/flp0/1232    |
| R01_cb17756_c25/flp0/509    | R01_cb17756_c25/flp0/509   | R01_cb17756_c25/flp0/509    | R01_cb17756_c25/flp0/509    | R01_cb17756_c25/flp0/509    |
| R01_cb18456_c7081/flp0/450  | R01_cb18456_c7081/flp0/450 | R01_cb18456_c7081/flp0/450  | R01_cb18456_c7081/flp0/450  | NA                          |
| R01_cb8476_c2/flp0/507      | R01_cb8476_c2/flp0/507     | R01_cb8476_c2/flp0/507      | R01_cb8476_c2/flp0/507      | R01_cb8476_c2/flp0/507      |
| R01_cb4293_c26/flp0/2872    | NA                         | R01_cb4293_c26/flp0/2872    | NA                          | NA                          |
| R01_cb8564_c82059/flp0/2438 | NA                         | R01_cb8564_c82059/flp0/2438 | R01_cb8564_c82059/flp0/2438 | NA                          |

|                              |                          |                             |                             |                              |
|------------------------------|--------------------------|-----------------------------|-----------------------------|------------------------------|
| R01_cb2959_c6/flp0/3470      | NA                       | NA                          | NA                          | R01_cb2959_c6/flp0/3470      |
| R01_cb8564_c45894/flp0/2258  | NA                       | NA                          | NA                          | R01_cb8564_c45894/flp0/2258  |
| R01_cb10215_c4/flp0/609      | NA                       | R01_cb10215_c4/flp0/609     | NA                          | NA                           |
| R01_cb11128_c0/f3p0/1559     | NA                       | NA                          | NA                          | R01_cb11128_c0/f3p0/1559     |
| R01_cb10506_c5/flp0/1571     | NA                       | R01_cb10506_c5/flp0/1571    | NA                          | NA                           |
| R01_cb13449_c8/flp0/686      | NA                       | NA                          | NA                          | R01_cb13449_c8/flp0/686      |
| R01_cb9262_c3/flp0/2414      | NA                       | R01_cb9262_c3/flp0/2414     | NA                          | NA                           |
| R01_cb4768_c26/flp1/2668     | NA                       | R01_cb4768_c26/flp1/2668    | NA                          | NA                           |
| R01_cb2223_c6/flp0/622       | R01_cb2223_c6/flp0/622   | R01_cb2223_c6/flp0/622      | R01_cb2223_c6/flp0/622      | R01_cb2223_c6/flp0/622       |
| R01_cb12682_c1/flp1/1667     | NA                       | NA                          | NA                          | R01_cb12682_c1/flp1/1667     |
| R01_cb18456_c1620/f2p0/1175  | NA                       | NA                          | R01_cb18456_c1620/f2p0/1175 | R01_cb18456_c1620/f2p0/1175  |
| R01_cb8564_c119720/flp0/2418 | NA                       | NA                          | NA                          | R01_cb8564_c119720/flp0/2418 |
| R01_cb15585_c16/flp0/531     | R01_cb15585_c16/flp0/531 | R01_cb15585_c16/flp0/531    | NA                          | R01_cb15585_c16/flp0/531     |
| R01_cb2773_c17/flp0/983      | NA                       | R01_cb2773_c17/flp0/983     | NA                          | NA                           |
| R01_cb15913_c4/flp0/945      | R01_cb15913_c4/flp0/945  | R01_cb15913_c4/flp0/945     | R01_cb15913_c4/flp0/945     | R01_cb15913_c4/flp0/945      |
| R01_cb8564_c84255/flp0/2733  | NA                       | NA                          | NA                          | R01_cb8564_c84255/flp0/2733  |
| R01_cb8564_c36548/flp0/3104  | NA                       | R01_cb8564_c36548/flp0/3104 | NA                          | R01_cb8564_c36548/flp0/3104  |
| R01_cb9357_c2/flp1/2109      | NA                       | NA                          | NA                          | R01_cb9357_c2/flp1/2109      |
| R01_cb3848_c13/flp0/2535     | NA                       | NA                          | NA                          | R01_cb3848_c13/flp0/2535     |
| R01_cb17297_c0/flp0/475      | R01_cb17297_c0/flp0/475  | R01_cb17297_c0/flp0/475     | R01_cb17297_c0/flp0/475     | R01_cb17297_c0/flp0/475      |
| R01_cb13910_c4/flp0/1395     | NA                       | R01_cb13910_c4/flp0/1395    | R01_cb13910_c4/flp0/1395    | R01_cb13910_c4/flp0/1395     |
| R01_cb17738_c2/flp0/1769     | NA                       | NA                          | NA                          | R01_cb17738_c2/flp0/1769     |
