# Supplementary material for: Single-molecule long-read sequencing of the full-length transcriptome of Rhododendron lapponicum L
Source: PubMed Central journal article supplement (PMC7174332; doi:10.1038/s41598-020-63814-x), 2020-04-21
Supplement: 41598_2020_63814_MOESM4_ESM.pdf [file 41598_2020_63814_MOESM4_ESM.pdf]

# Single-molecule long-read sequencing of the full-length transcriptome of *Rhododendron lapponicum* L.

Xinping Jia, Ling Tang, Xueying Mei, Huazhou Liu, Hairong Luo, Yanming Deng, Jiale Su

Institute of Leisure Agriculture, Jiangsu Academy of Agricultural Sciences, Jiangsu Key Laboratory for Horticultural Crop Genetic Improvement, Nanjing 210014, China

Table S4 Summary of TFs identified

| #ID                          | Family    | Type |
|------------------------------|-----------|------|
| F01_cb10016_c0/f2p0/1728-0F  | bZIP      | TF   |
| F01_cb10016_c1/f2p0/1827-0F  | bZIP      | TF   |
| F01_cb10016_c2/f1p0/1840-0F  | bZIP      | TF   |
| F01_cb1001_c0/f1p0/4503-1F   | SET       | TR   |
| F01_cb1001_c1/f1p0/4288-0F   | SET       | TR   |
| F01_cb1001_c10/f1p0/2566-0F  | SET       | TR   |
| F01_cb1001_c11/f1p0/5852-2F  | SET       | TR   |
| F01_cb1001_c4/f1p0/4389-2F   | SET       | TR   |
| F01_cb1001_c8/f1p0/2108-1F   | SET       | TR   |
| F01_cb10034_c28/f1p5/2081-2R | Others    | TR   |
| F01_cb10067_c1/f5p0/1837-0F  | Trihelix  | TF   |
| F01_cb10067_c2/f1p0/1963-2F  | Trihelix  | TF   |
| F01_cb10076_c10/f1p0/806-1F  | HMG       | TR   |
| F01_cb10076_c13/f1p0/1019-0F | HMG       | TR   |
| F01_cb10076_c14/f5p0/933-0F  | HMG       | TR   |
| F01_cb10076_c2/f1p0/1025-1F  | HMG       | TR   |
| F01_cb10076_c5/f1p0/878-2F   | HMG       | TR   |
| F01_cb10076_c6/f1p0/949-1F   | HMG       | TR   |
| F01_cb10076_c7/f1p0/940-0F   | HMG       | TR   |
| F01_cb10076_c8/f1p0/1357-2F  | HMG       | TR   |
| F01_cb10076_c9/f10p0/893-0F  | HMG       | TR   |
| F01_cb10085_c0/f2p0/1767-2F  | C2C2-GATA | TF   |
| F01_cb10085_c1/f2p0/1754-2F  | C2C2-GATA | TF   |
| F01_cb10085_c2/f1p0/1629-2F  | C2C2-GATA | TF   |

---

|                               |             |    |
|-------------------------------|-------------|----|
| F01_cb10109_c6/f8p2/1221-1F   | PLATZ       | TF |
| F01_cb10109_c9/f5p3/1322-0F   | PLATZ       | TF |
| F01_cb10117_c10/f1p0/2724-0F  | HB-HD-ZIP   | TF |
| F01_cb10117_c15/f1p0/1431-0F  | HB-HD-ZIP   | TF |
| F01_cb10117_c21/f38p2/1632-0F | HB-HD-ZIP   | TF |
| F01_cb10117_c5/f2p2/1657-0F   | HB-other    | TF |
| F01_cb10117_c8/f1p2/1684-2F   | HB-HD-ZIP   | TF |
| F01_cb10117_c9/f1p0/1947-2F   | HB-HD-ZIP   | TF |
| F01_cb1011_c10/f1p0/4389-2F   | SET         | TR |
| F01_cb1011_c3/f1p0/4520-0F    | SET         | TR |
| F01_cb1011_c7/f1p0/4494-2F    | SET         | TR |
| F01_cb10146_c3/f1p0/2688-0F   | AUX/IAA     | TR |
| F01_cb10146_c3/f1p0/2688-2R   | AUX/IAA     | TR |
| F01_cb10146_c5/f1p8/1206-2F   | AUX/IAA     | TR |
| F01_cb10149_c0/f1p0/1722-1F   | Others      | TR |
| F01_cb10157_c0/f4p0/1568-2F   | GeBP        | TF |
| F01_cb10157_c1/f2p0/1630-0F   | GeBP        | TF |
| F01_cb10157_c2/f2p0/1545-1F   | GeBP        | TF |
| F01_cb10194_c0/f8p0/1318-2F   | MYB         | TF |
| F01_cb10194_c2/f1p0/2011-2F   | MYB         | TF |
| F01_cb10194_c4/f1p0/1404-0F   | MYB         | TF |
| F01_cb10194_c6/f1p1/1456-2F   | MYB         | TF |
| F01_cb10212_c0/f3p0/1000-2F   | MADS-MIKC   | TF |
| F01_cb10212_c1/f1p0/1976-0F   | MADS-M-type | TF |
| F01_cb10216_c2/f1p0/1904-1F   | bHLH        | TF |
| F01_cb10216_c3/f1p0/1404-0F   | bHLH        | TF |

---

---

|                              |             |    |
|------------------------------|-------------|----|
| F01_cb10216_c4/f4p0/1536-1F  | bHLH        | TF |
| F01_cb10225_c0/f5p0/981-2F   | bHLH        | TF |
| F01_cb10225_c1/f2p0/1025-1F  | bHLH        | TF |
| F01_cb10225_c2/f1p0/1923-2F  | bHLH        | TF |
| F01_cb1024_c0/f1p0/4515-1F   | BES1        | TF |
| F01_cb1024_c0/f1p0/4515-2F   | BES1        | TF |
| F01_cb1024_c11/f1p0/3144-1F  | BES1        | TF |
| F01_cb1024_c14/f1p0/3152-1F  | BES1        | TF |
| F01_cb1024_c14/f1p0/3152-2F  | BES1        | TF |
| F01_cb1024_c17/f1p0/2936-1F  | BES1        | TF |
| F01_cb1024_c3/f1p0/3567-2F   | BES1        | TF |
| F01_cb1024_c4/f1p0/2950-2F   | BES1        | TF |
| F01_cb1024_c6/f1p0/2936-1F   | BES1        | TF |
| F01_cb1024_c9/f1p0/4102-0F   | BES1        | TF |
| F01_cb1024_c9/f1p0/4102-2F   | BES1        | TF |
| F01_cb10277_c1/f1p0/1796-1F  | AP2/ERF-ERF | TF |
| F01_cb10277_c3/f1p1/1749-2F  | AP2/ERF-ERF | TF |
| F01_cb10287_c1/f1p0/1904-0F  | AP2/ERF-ERF | TF |
| F01_cb10287_c2/f1p0/987-2F   | AP2/ERF-ERF | TF |
| F01_cb10293_c10/f1p0/1244-0F | MYB-related | TF |
| F01_cb10293_c10/f1p0/1244-0R | MYB-related | TF |
| F01_cb10293_c11/f1p0/760-0F  | MYB-related | TF |
| F01_cb10293_c14/f6p4/949-2F  | MYB         | TF |
| F01_cb10293_c6/f1p1/2320-0F  | MYB         | TF |
| F01_cb10293_c7/f1p0/746-2F   | MYB-related | TF |
| F01_cb10297_c1/f1p0/1718-0F  | TRAF        | TR |

---

---

|                              |              |    |
|------------------------------|--------------|----|
| F01_cb10297_c10/flp0/1778-2F | TRAF         | TR |
| F01_cb10297_c2/flp0/1900-2F  | TRAF         | TR |
| F01_cb10297_c3/flp0/1887-0F  | TRAF         | TR |
| F01_cb10297_c4/flp0/2035-0F  | TRAF         | TR |
| F01_cb10297_c5/flp0/1838-0F  | TRAF         | TR |
| F01_cb10297_c7/flp0/1757-0F  | TRAF         | TR |
| F01_cb10297_c8/f2p0/1646-2F  | TRAF         | TR |
| F01_cb10300_c2/flp0/2334-2F  | bHLH         | TF |
| F01_cb10300_c4/flp0/1430-2F  | bHLH         | TF |
| F01_cb10300_c6/flp0/1813-2F  | bHLH         | TF |
| F01_cb10300_c7/flp0/1744-1F  | bHLH         | TF |
| F01_cb10301_c1/flp0/2686-2F  | TRAF         | TR |
| F01_cb10310_c0/flp0/2004-1F  | C2H2         | TF |
| F01_cb10310_c1/flp0/1974-0F  | C2H2         | TF |
| F01_cb10310_c4/flp1/1855-1F  | C2H2         | TF |
| F01_cb10314_c10/flp3/565-1F  | zf-HD        | TF |
| F01_cb10314_c2/f2p2/703-2F   | zf-HD        | TF |
| F01_cb10314_c5/flp0/667-2F   | zf-HD        | TF |
| F01_cb10314_c8/flp0/729-2F   | zf-HD        | TF |
| F01_cb10314_c9/f2p2/565-1F   | zf-HD        | TF |
| F01_cb10330_c1/flp0/1746-2F  | GARP-G2-like | TF |
| F01_cb10330_c4/flp0/1465-0F  | GARP-G2-like | TF |
| F01_cb10330_c5/flp0/1234-2F  | GARP-G2-like | TF |
| F01_cb10330_c6/flp0/1244-1F  | GARP-G2-like | TF |
| F01_cb10331_c1/flp0/1922-1F  | C2H2         | TF |
| F01_cb10331_c3/flp2/1317-0F  | C2H2         | TF |

---

---

|                             |           |    |
|-----------------------------|-----------|----|
| F01_cb10343_c0/f2p0/1206-1F | SOH1      | TR |
| F01_cb10343_c1/f1p0/2337-1F | SOH1      | TR |
| F01_cb10343_c5/f1p0/1879-0F | SOH1      | TR |
| F01_cb10367_c0/f6p2/1078-0F | MADS-MIKC | TF |
| F01_cb10367_c3/f2p1/1104-0F | MADS-MIKC | TF |
| F01_cb10367_c4/f1p0/2732-1F | MADS-MIKC | TF |
| F01_cb10367_c5/f1p0/875-0F  | MADS-MIKC | TF |
| F01_cb10367_c9/f7p2/1046-0F | MADS-MIKC | TF |
| F01_cb10394_c1/f1p0/1985-0F | C2H2      | TF |
| F01_cb10417_c0/f1p0/962-0F  | B3        | TF |
| F01_cb10417_c1/f1p0/3467-0F | B3        | TF |
| F01_cb10417_c2/f1p0/837-1F  | B3        | TF |
| F01_cb10417_c3/f1p0/783-1F  | B3        | TF |
| F01_cb10417_c4/f1p0/889-0F  | B3        | TF |
| F01_cb10417_c5/f1p0/1424-1F | B3        | TF |
| F01_cb10440_c0/f2p0/1764-1F | mTERF     | TR |
| F01_cb10440_c1/f1p0/1690-0F | mTERF     | TR |
| F01_cb10440_c2/f1p0/2030-0F | mTERF     | TR |
| F01_cb10440_c2/f1p0/2030-1F | mTERF     | TR |
| F01_cb10440_c3/f1p0/2001-0F | mTERF     | TR |
| F01_cb10440_c4/f1p0/1748-2F | mTERF     | TR |
| F01_cb10440_c6/f1p0/1468-1F | mTERF     | TR |
| F01_cb10440_c8/f1p0/1840-2F | mTERF     | TR |
| F01_cb10471_c2/f3p1/1771-1F | BBR-BPC   | TF |
| F01_cb10471_c3/f1p0/1767-2F | BBR-BPC   | TF |
| F01_cb10471_c4/f1p1/2111-0F | BBR-BPC   | TF |

---

---

|                              |             |    |
|------------------------------|-------------|----|
| F01_cb10471_c5/f1p1/1667-1F  | BBR-BPC     | TF |
| F01_cb10471_c6/f1p0/1683-1F  | BBR-BPC     | TF |
| F01_cb1047_c8/f1p4/6596-1R   | MYB-related | TF |
| F01_cb10496_c1/f4p0/1487-1F  | C3H         | TF |
| F01_cb10496_c2/f1p0/2309-2F  | C3H         | TF |
| F01_cb10496_c7/f3p0/1482-1F  | C3H         | TF |
| F01_cb10496_c8/f3p0/1467-2F  | C3H         | TF |
| F01_cb104_c11/f1p0/4029-0F   | SBP         | TF |
| F01_cb104_c12/f1p0/3686-1F   | SBP         | TF |
| F01_cb104_c17/f1p0/3640-1F   | SBP         | TF |
| F01_cb104_c18/f1p0/4363-0F   | SBP         | TF |
| F01_cb104_c22/f8p2/3884-1F   | SBP         | TF |
| F01_cb104_c3/f4p2/3886-2F    | SBP         | TF |
| F01_cb104_c5/f1p0/4986-1F    | SBP         | TF |
| F01_cb104_c6/f1p0/3759-0F    | SBP         | TF |
| F01_cb10522_c10/f8p2/1454-1F | bZIP        | TF |
| F01_cb10522_c2/f1p0/2435-1F  | bZIP        | TF |
| F01_cb10522_c3/f1p0/1671-0F  | bZIP        | TF |
| F01_cb10522_c6/f1p0/1705-0F  | bZIP        | TF |
| F01_cb10522_c9/f12p0/1530-0F | bZIP        | TF |
| F01_cb10527_c1/f1p0/2657-1R  | MYB-related | TF |
| F01_cb10534_c2/f2p1/1206-1F  | C2C2-GATA   | TF |
| F01_cb10534_c3/f1p0/3489-2F  | C2C2-GATA   | TF |
| F01_cb10534_c4/f1p1/1333-2F  | C2C2-GATA   | TF |
| F01_cb10534_c5/f1p0/1161-1F  | C2C2-GATA   | TF |
| F01_cb10545_c0/f2p0/1242-2F  | AP2/ERF-ERF | TF |

---

---

|                             |                |    |
|-----------------------------|----------------|----|
| F01_cb10552_c0/f4p1/743-1F  | SWI/SNF-BAF60b | TR |
| F01_cb10552_c2/f1p0/2254-0F | SWI/SNF-BAF60b | TR |
| F01_cb10552_c2/f1p0/2254-2F | SWI/SNF-BAF60b | TR |
| F01_cb10552_c3/f1p0/763-2F  | SWI/SNF-BAF60b | TR |
| F01_cb10569_c3/f3p1/1359-2F | AP2/ERF-ERF    | TF |
| F01_cb10580_c0/f1p0/1704-2F | C2C2-Dof       | TF |
| F01_cb10580_c1/f1p0/2371-2F | C2C2-Dof       | TF |
| F01_cb10580_c2/f1p0/1796-2F | C2C2-Dof       | TF |
| F01_cb10631_c0/f1p0/1110-2F | Alfin-like     | TF |
| F01_cb10631_c2/f1p0/1074-0F | Alfin-like     | TF |
| F01_cb10651_c0/f1p0/1807-0F | bZIP           | TF |
| F01_cb10655_c1/f1p0/1032-0F | NF-YC          | TF |
| F01_cb10675_c3/f1p0/2177-0F | MYB            | TF |
| F01_cb10675_c4/f1p0/1822-1F | MYB            | TF |
| F01_cb10675_c5/f1p0/1538-2F | MYB-related    | TF |
| F01_cb10675_c6/f1p0/1511-2F | MYB            | TF |
| F01_cb10685_c2/f1p0/1016-1F | C2C2-YABBY     | TF |
| F01_cb10685_c4/f1p0/897-0F  | C2C2-YABBY     | TF |
| F01_cb10686_c0/f1p0/1630-2F | BBR-BPC        | TF |
| F01_cb10686_c2/f1p0/1570-2F | BBR-BPC        | TF |
| F01_cb10687_c0/f4p0/1528-1F | C3H            | TF |
| F01_cb10687_c2/f2p1/1715-0F | C3H            | TF |
| F01_cb10697_c3/f1p0/3232-0F | SBP            | TF |
| F01_cb10697_c3/f1p0/3232-2F | SBP            | TF |
| F01_cb10697_c6/f1p0/820-1F  | SBP            | TF |
| F01_cb10697_c7/f6p0/887-0F  | SBP            | TF |

---



---

|                             |           |    |
|-----------------------------|-----------|----|
| F01_cb10707_c0/flp0/1395-2F | AUX/IAA   | TR |
| F01_cb10707_c2/flp0/1665-2F | AUX/IAA   | TR |
| F01_cb10707_c3/flp0/1620-0F | AUX/IAA   | TR |
| F01_cb10708_c0/flp0/1783-0F | Red1-like | TR |
| F01_cb10708_c1/flp0/2292-0F | Red1-like | TR |
| F01_cb10708_c1/flp0/2292-2F | Red1-like | TR |
| F01_cb10710_c0/flp0/1357-1F | BBR-BPC   | TF |
| F01_cb10710_c1/flp0/2345-1F | BBR-BPC   | TF |
| F01_cb10710_c2/flp0/1395-2F | BBR-BPC   | TF |
| F01_cb10712_c2/flp1/3797-0F | C3H       | TF |
| F01_cb10712_c2/flp1/3797-1F | C3H       | TF |
| F01_cb10712_c2/flp1/3797-2F | C3H       | TF |
| F01_cb10712_c3/flp0/942-1F  | C3H       | TF |
| F01_cb10712_c5/f3p0/1597-2F | C3H       | TF |
| F01_cb10715_c1/flp0/3184-1F | C3H       | TF |
| F01_cb10728_c1/flp0/1935-0R | Tify      | TF |
| F01_cb10728_c2/flp1/1257-1R | Tify      | TF |
| F01_cb10734_c1/flp0/1914-0F | PHD       | TR |
| F01_cb10734_c2/flp0/1126-0F | PHD       | TR |
| F01_cb10736_c0/flp0/1267-0F | ARID      | TR |
| F01_cb10736_c0/flp0/1267-2F | HMG       | TR |
| F01_cb10736_c1/flp0/3095-2F | ARID      | TR |
| F01_cb10736_c2/flp0/1061-1F | ARID      | TR |
| F01_cb10737_c0/f4p0/1679-0F | C2C2-GATA | TF |
| F01_cb10737_c1/flp0/1858-1F | C2C2-GATA | TF |
| F01_cb10747_c0/flp0/1409-0F | B3        | TF |

---

---

|                             |             |    |
|-----------------------------|-------------|----|
| F01_cb10755_c2/f2p2/1076-0F | LIM         | TF |
| F01_cb10755_c3/f1p0/2369-1F | Others      | TR |
| F01_cb10779_c0/f2p0/625-1F  | bHLH        | TF |
| F01_cb10779_c2/f1p0/681-1F  | bHLH        | TF |
| F01_cb10794_c0/f1p0/1847-0F | GRAS        | TF |
| F01_cb10794_c0/f1p0/1847-2F | GRAS        | TF |
| F01_cb10794_c1/f1p0/1941-1F | GRAS        | TF |
| F01_cb10794_c1/f1p0/1941-2F | GRAS        | TF |
| F01_cb10796_c2/f1p0/1474-2F | NAC         | TF |
| F01_cb10796_c6/f1p0/1325-2F | NAC         | TF |
| F01_cb10796_c7/f2p0/1424-1F | NAC         | TF |
| F01_cb10796_c9/f1p0/1462-0F | NAC         | TF |
| F01_cb10819_c0/f1p0/1532-1F | bHLH        | TF |
| F01_cb10819_c1/f1p0/2192-2F | bHLH        | TF |
| F01_cb10819_c3/f1p0/1514-0F | bHLH        | TF |
| F01_cb10835_c0/f3p0/1697-2F | AP2/ERF-AP2 | TF |
| F01_cb10835_c1/f1p0/2503-0F | AP2/ERF-ERF | TF |
| F01_cb10835_c1/f1p0/2503-2F | AP2/ERF-ERF | TF |
| F01_cb10839_c1/f2p0/1210-2F | WRKY        | TF |
| F01_cb10839_c2/f1p0/2420-1F | WRKY        | TF |
| F01_cb10839_c3/f1p0/1112-2F | WRKY        | TF |
| F01_cb10839_c5/f2p0/1168-2F | WRKY        | TF |
| F01_cb10842_c1/f1p0/1781-1F | Others      | TR |
| F01_cb10842_c6/f1p0/1044-2F | Others      | TR |
| F01_cb10842_c7/f1p0/1028-1F | Others      | TR |
| F01_cb10842_c8/f6p0/1301-2F | Others      | TR |

---

---

|                             |             |    |
|-----------------------------|-------------|----|
| F01_cb10854_c1/f2p1/1540-1F | TAZ         | TR |
| F01_cb10854_c3/flp0/2817-0F | TAZ         | TR |
| F01_cb10854_c7/f3p1/1572-2F | TAZ         | TR |
| F01_cb10855_c0/flp0/1369-0F | Tify        | TF |
| F01_cb10855_c0/flp0/1369-1F | Others      | TR |
| F01_cb10855_c1/flp0/1950-2F | Tify        | TF |
| F01_cb10855_c2/flp0/1343-2F | Tify        | TF |
| F01_cb10855_c4/flp0/1827-0F | Tify        | TF |
| F01_cb1086_c1/flp0/4509-2F  | HSF         | TF |
| F01_cb1086_c2/flp0/2114-1F  | HSF         | TF |
| F01_cb1086_c6/flp0/2686-2F  | HSF         | TF |
| F01_cb1086_c8/flp2/2297-1F  | HSF         | TF |
| F01_cb10882_c0/flp0/1582-2F | GNAT        | TR |
| F01_cb10882_c1/flp0/2758-1F | GNAT        | TR |
| F01_cb10883_c1/flp1/1342-0F | MADS-M-type | TF |
| F01_cb10883_c2/flp0/2114-2F | MADS-M-type | TF |
| F01_cb10901_c0/flp0/1542-1F | mTERF       | TR |
| F01_cb10901_c0/flp0/1542-2F | mTERF       | TR |
| F01_cb10901_c1/flp0/1939-0F | mTERF       | TR |
| F01_cb10901_c2/flp0/1770-0F | mTERF       | TR |
| F01_cb10901_c3/flp0/1596-0F | mTERF       | TR |
| F01_cb10905_c3/flp0/6047-0F | RWP-RK      | TF |
| F01_cb10905_c3/flp0/6047-2F | bHLH        | TF |
| F01_cb10906_c1/flp0/2092-0F | SET         | TR |
| F01_cb10928_c0/f2p0/1619-0F | bZIP        | TF |
| F01_cb10928_c1/flp0/1850-2F | bZIP        | TF |

---

---

|                              |             |    |
|------------------------------|-------------|----|
| F01_cb10928_c3/f1p0/1689-1F  | bZIP        | TF |
| F01_cb10932_c5/f1p0/1663-2F  | TCP         | TF |
| F01_cb10932_c7/f1p0/1672-1F  | TCP         | TF |
| F01_cb10934_c0/f7p0/1199-1F  | bZIP        | TF |
| F01_cb10934_c3/f1p0/2605-1F  | bZIP        | TF |
| F01_cb10934_c5/f1p0/1190-1F  | bZIP        | TF |
| F01_cb10934_c6/f1p0/1185-0F  | bZIP        | TF |
| F01_cb10934_c7/f2p0/1121-2F  | bZIP        | TF |
| F01_cb10949_c0/f2p0/1197-0F  | WRKY        | TF |
| F01_cb10949_c3/f1p0/2940-0F  | WRKY        | TF |
| F01_cb10949_c4/f1p0/1390-2F  | WRKY        | TF |
| F01_cb10949_c6/f1p0/1080-1F  | WRKY        | TF |
| F01_cb10951_c0/f1p0/1115-1F  | MYB-related | TF |
| F01_cb10951_c1/f1p0/2075-2F  | MYB-related | TF |
| F01_cb10951_c2/f1p0/1119-2F  | MYB-related | TF |
| F01_cb10954_c0/f13p0/1830-1F | TUB         | TF |
| F01_cb10954_c1/f1p0/1887-1F  | TUB         | TF |
| F01_cb10954_c2/f1p0/1767-0F  | TUB         | TF |
| F01_cb10954_c2/f1p0/1767-1F  | TUB         | TF |
| F01_cb10984_c0/f4p0/1068-2F  | AUX/IAA     | TR |
| F01_cb10984_c1/f1p0/1952-1F  | AUX/IAA     | TR |
| F01_cb10984_c1/f1p0/1952-2F  | AUX/IAA     | TR |
| F01_cb11010_c0/f3p0/1732-0F  | AP2/ERF-ERF | TF |
| F01_cb11010_c4/f1p0/1728-0F  | AP2/ERF-ERF | TF |
| F01_cb11010_c5/f1p0/1834-2F  | AP2/ERF-ERF | TF |
| F01_cb11028_c0/f1p0/1229-0F  | MYB         | TF |

---

---

|                             |              |    |
|-----------------------------|--------------|----|
| F01_cb11028_c1/flp0/2918-2F | MYB          | TF |
| F01_cb11058_c0/flp0/1748-1F | TUB          | TF |
| F01_cb11058_c1/flp0/2419-0R | TUB          | TF |
| F01_cb11058_c1/flp0/2419-1F | TUB          | TF |
| F01_cb11113_c0/flp0/1450-0F | MADS-M-type  | TF |
| F01_cb11117_c1/flp1/951-1F  | C2C2-LSD     | TF |
| F01_cb11117_c2/flp1/3308-0F | C2C2-LSD     | TF |
| F01_cb11117_c3/flp2/1078-1F | C2C2-LSD     | TF |
| F01_cb11117_c4/flp1/1055-1F | C2C2-LSD     | TF |
| F01_cb11118_c0/flp0/1597-1F | WRKY         | TF |
| F01_cb11118_c1/flp0/2955-2F | WRKY         | TF |
| F01_cb11133_c1/flp0/2603-1F | HSF          | TF |
| F01_cb11133_c2/flp0/1209-2F | HSF          | TF |
| F01_cb11151_c0/flp0/1503-1F | C2H2         | TF |
| F01_cb11151_c1/flp0/2174-2F | C2H2         | TF |
| F01_cb11168_c1/flp0/1970-0F | C2C2-Dof     | TF |
| F01_cb11189_c0/flp0/1527-0F | GARP-G2-like | TF |
| F01_cb11189_c1/flp0/1926-0F | GARP-G2-like | TF |
| F01_cb11189_c3/flp0/1904-2F | GARP-G2-like | TF |
| F01_cb11199_c3/flp0/1946-2F | MYB-related  | TF |
| F01_cb11199_c4/flp0/2106-2F | MYB-related  | TF |
| F01_cb11213_c0/flp0/1532-0F | C2C2-CO-like | TF |
| F01_cb11213_c1/flp0/2821-0F | Others       | TR |
| F01_cb11213_c1/flp0/2821-1F | Others       | TR |
| F01_cb11213_c2/flp0/470-0F  | Others       | TR |
| F01_cb11215_c2/flp1/3800-0R | B3           | TF |

---

---

|                             |           |    |
|-----------------------------|-----------|----|
| F01_cb11217_c0/f3p0/1673-0F | bZIP      | TF |
| F01_cb11217_c1/f2p0/1583-2F | bZIP      | TF |
| F01_cb11217_c2/f1p0/2080-0F | bZIP      | TF |
| F01_cb11233_c1/f1p0/2442-0F | HB-HD-ZIP | TF |
| F01_cb11233_c3/f1p1/1474-2F | HB-HD-ZIP | TF |
| F01_cb11240_c2/f1p0/1856-1F | bHLH      | TF |
| F01_cb11240_c3/f1p0/1825-1F | bHLH      | TF |
| F01_cb11240_c4/f1p0/1711-2F | bHLH      | TF |
| F01_cb11245_c0/f2p0/1092-1F | Tify      | TF |
| F01_cb11245_c1/f2p0/1231-0F | Tify      | TF |
| F01_cb11245_c2/f1p0/3396-0F | Tify      | TF |
| F01_cb11245_c2/f1p0/3396-2F | Others    | TR |
| F01_cb11245_c3/f1p0/1718-1F | Others    | TR |
| F01_cb11245_c3/f1p0/1718-2F | Tify      | TF |
| F01_cb11276_c2/f1p0/1391-1F | B3        | TF |
| F01_cb11277_c0/f2p1/1609-1F | GRAS      | TF |
| F01_cb11277_c1/f1p1/1966-0F | GRAS      | TF |
| F01_cb11277_c1/f1p1/1966-2F | GRAS      | TF |
| F01_cb11290_c4/f1p0/1024-1F | C2H2      | TF |
| F01_cb11290_c6/f1p0/1349-2F | C2H2      | TF |
| F01_cb11330_c1/f1p0/2773-0F | HSF       | TF |
| F01_cb11330_c3/f1p0/1877-2F | HSF       | TF |
| F01_cb11351_c0/f1p0/944-2F  | NF-YB     | TF |
| F01_cb11351_c1/f1p0/3360-0F | NF-YB     | TF |
| F01_cb11351_c2/f1p0/974-1F  | NF-YB     | TF |
| F01_cb11362_c0/f1p0/975-0F  | FAR1      | TF |

---

---

|                              |             |    |
|------------------------------|-------------|----|
| F01_cb11362_c1/flp0/2434-0F  | FAR1        | TF |
| F01_cb11362_c2/flp0/981-1F   | FAR1        | TF |
| F01_cb11380_c0/flp0/1605-0F  | AP2/ERF-ERF | TF |
| F01_cb11380_c1/flp0/2062-2F  | AP2/ERF-ERF | TF |
| F01_cb11380_c2/flp0/1784-0F  | AP2/ERF-ERF | TF |
| F01_cb11381_c0/flp0/1547-2F  | NF-YA       | TF |
| F01_cb11381_c1/flp0/2416-1F  | NF-YA       | TF |
| F01_cb11384_c0/flp0/1833-1F  | FAR1        | TF |
| F01_cb11384_c1/flp0/1921-1F  | FAR1        | TF |
| F01_cb11389_c1/flp0/1954-0F  | SBP         | TF |
| F01_cb11389_c2/flp0/1676-0F  | SBP         | TF |
| F01_cb11389_c3/flp0/1754-0F  | SBP         | TF |
| F01_cb11389_c4/flp0/1701-0F  | SBP         | TF |
| F01_cb11403_c1/flp0/1722-0F  | C2C2-GATA   | TF |
| F01_cb11403_c1/flp0/1722-2F  | Tify        | TF |
| F01_cb11403_c4/f2p0/1632-2F  | C2C2-GATA   | TF |
| F01_cb11403_c5/f2p0/1683-1F  | C2C2-GATA   | TF |
| F01_cb11408_c0/f2p2/728-2F   | bZIP        | TF |
| F01_cb11408_c2/flp1/2605-2F  | bZIP        | TF |
| F01_cb11449_c0/flp0/974-1F   | SBP         | TF |
| F01_cb11449_c0/flp0/974-2F   | SBP         | TF |
| F01_cb11449_c1/flp0/2586-0F  | SBP         | TF |
| F01_cb11449_c1/flp0/2586-2F  | SBP         | TF |
| F01_cb11452_c1/f2p0/1866-2F  | bHLH        | TF |
| F01_cb11452_c10/flp0/1962-0F | bHLH        | TF |
| F01_cb11493_c1/flp0/1127-0F  | C3H         | TF |

---

---

|                             |                |    |
|-----------------------------|----------------|----|
| F01_cb11493_c1/flp0/1127-2F | C3H            | TF |
| F01_cb11493_c2/flp0/3557-1F | C3H            | TF |
| F01_cb11493_c3/flp0/1433-2F | C3H            | TF |
| F01_cb11495_c0/flp0/1331-0F | MYB            | TF |
| F01_cb11495_c1/flp0/2019-1F | MYB-related    | TF |
| F01_cb11495_c1/flp0/2019-2F | MYB-related    | TF |
| F01_cb11497_c0/flp0/1736-1F | WRKY           | TF |
| F01_cb11497_c1/flp0/2006-0F | WRKY           | TF |
| F01_cb11498_c0/f2p0/1015-1F | MED7           | TR |
| F01_cb11501_c0/flp0/1463-2F | Others         | TR |
| F01_cb11537_c0/flp0/1374-1F | Others         | TR |
| F01_cb11537_c1/flp0/2859-2F | Others         | TR |
| F01_cb11537_c2/flp0/1364-1F | Others         | TR |
| F01_cb11541_c0/flp0/1099-0F | B3             | TF |
| F01_cb11555_c0/flp0/1365-0F | GARP-G2-like   | TF |
| F01_cb11555_c1/flp0/2126-1F | GARP-G2-like   | TF |
| F01_cb11565_c0/flp0/1531-0F | mTERF          | TR |
| F01_cb11565_c1/flp0/2202-0F | mTERF          | TR |
| F01_cb11586_c0/f2p0/1432-0F | SWI/SNF-BAF60b | TR |
| F01_cb11586_c1/f2p0/1321-1F | SWI/SNF-BAF60b | TR |
| F01_cb11586_c2/flp0/3270-0F | SWI/SNF-BAF60b | TR |
| F01_cb11589_c0/flp0/1162-1F | MYB-related    | TF |
| F01_cb11589_c1/flp0/2770-1F | MYB-related    | TF |
| F01_cb11595_c0/flp0/1020-1F | LOB            | TF |
| F01_cb11595_c1/flp0/2065-0F | LOB            | TF |
| F01_cb11595_c1/flp0/2065-2F | LOB            | TF |

---



---

|                              |              |    |
|------------------------------|--------------|----|
| F01_cb11596_c1/flp0/3195-2F  | mTERF        | TR |
| F01_cb11596_c1/flp0/3195-2R  | mTERF        | TR |
| F01_cb11597_c0/f2p0/1427-2F  | BBR-BPC      | TF |
| F01_cb11615_c0/flp0/1362-0F  | MYB-related  | TF |
| F01_cb11615_c1/flp0/2012-1F  | MYB-related  | TF |
| F01_cb11615_c2/flp0/1391-2F  | MYB-related  | TF |
| F01_cb11618_c0/f2p0/908-0F   | FAR1         | TF |
| F01_cb11632_c1/flp0/2477-0F  | MYB-related  | TF |
| F01_cb11632_c1/flp0/2477-2F  | MYB-related  | TF |
| F01_cb11636_c0/f2p0/1844-0F  | bZIP         | TF |
| F01_cb11636_c10/flp0/1825-1F | bZIP         | TF |
| F01_cb11636_c12/flp0/1823-1F | bZIP         | TF |
| F01_cb11636_c13/flp0/1820-0F | bZIP         | TF |
| F01_cb11636_c3/flp0/2559-0F  | bZIP         | TF |
| F01_cb11636_c4/flp0/1786-0F  | bZIP         | TF |
| F01_cb11636_c7/flp0/1863-1F  | bZIP         | TF |
| F01_cb11636_c8/flp0/2436-0F  | bZIP         | TF |
| F01_cb11637_c0/flp0/1510-1F  | SBP          | TF |
| F01_cb11637_c1/flp0/2015-0F  | SBP          | TF |
| F01_cb11637_c1/flp0/2015-1F  | SBP          | TF |
| F01_cb11638_c0/flp0/1765-0F  | mTERF        | TR |
| F01_cb11648_c1/flp0/3520-1F  | MADS-M-type  | TF |
| F01_cb11648_c2/flp0/1870-0F  | MADS-M-type  | TF |
| F01_cb11661_c0/flp0/1667-1F  | GARP-G2-like | TF |
| F01_cb11661_c1/flp0/1926-1F  | GARP-G2-like | TF |
| F01_cb11672_c1/flp0/1988-0F  | C2C2-Dof     | TF |

---

---

|                             |                |    |
|-----------------------------|----------------|----|
| F01_cb11672_c2/flp0/1570-1F | C2C2-Dof       | TF |
| F01_cb11687_c0/flp0/1089-1F | MYB            | TF |
| F01_cb11687_c1/flp0/2258-0F | MYB-related    | TF |
| F01_cb11687_c1/flp0/2258-1F | MYB-related    | TF |
| F01_cb11704_c2/flp0/3738-1R | B3-ARF         | TF |
| F01_cb11728_c0/flp0/1316-0F | NF-YA          | TF |
| F01_cb11728_c1/flp0/2287-2F | NF-YA          | TF |
| F01_cb11730_c0/flp0/1803-1F | AP2/ERF-AP2    | TF |
| F01_cb11730_c1/flp0/2299-1F | AP2/ERF-ERF    | TF |
| F01_cb11760_c0/flp0/1120-1F | C2C2-GATA      | TF |
| F01_cb11760_c1/flp0/3328-2F | C2C2-GATA      | TF |
| F01_cb11766_c0/f2p0/870-0F  | SWI/SNF-BAF60b | TR |
| F01_cb11766_c1/flp0/2462-1F | SWI/SNF-BAF60b | TR |
| F01_cb11772_c1/flp0/2298-2F | SET            | TR |
| F01_cb11778_c0/flp0/1206-0F | C2H2           | TF |
| F01_cb11778_c1/flp0/2667-1F | C2H2           | TF |
| F01_cb11784_c0/flp0/1508-0F | TCP            | TF |
| F01_cb1178_c17/flp0/1559-2F | SRS            | TF |
| F01_cb11803_c0/flp0/1137-0F | FAR1           | TF |
| F01_cb11803_c1/flp0/2877-0F | FAR1           | TF |
| F01_cb11803_c2/flp0/1104-2F | FAR1           | TF |
| F01_cb11824_c1/flp0/2561-1F | GARP-G2-like   | TF |
| F01_cb11826_c0/flp0/1708-1F | bHLH           | TF |
| F01_cb11828_c1/flp0/2017-0R | MYB            | TF |
| F01_cb11836_c0/flp0/1194-1F | NAC            | TF |
| F01_cb11836_c1/flp0/1906-1F | NAC            | TF |

---

---

|                              |                |    |
|------------------------------|----------------|----|
| F01_cb11853_c0/f15p0/1059-2F | C2H2           | TF |
| F01_cb11853_c2/f1p1/1142-1F  | C2H2           | TF |
| F01_cb11853_c3/f1p2/1103-2F  | C2H2           | TF |
| F01_cb11853_c5/f1p0/1092-0F  | C2H2           | TF |
| F01_cb11891_c0/f2p0/703-0F   | HMG            | TR |
| F01_cb11891_c1/f1p0/972-1F   | HMG            | TR |
| F01_cb11891_c1/f1p0/972-1R   | HMG            | TR |
| F01_cb11891_c2/f1p0/814-0F   | HMG            | TR |
| F01_cb11893_c0/f1p0/1318-0F  | HB-HD-ZIP      | TF |
| F01_cb12021_c2/f1p1/1311-2F  | AP2/ERF-ERF    | TF |
| F01_cb12021_c5/f1p0/1024-2F  | AP2/ERF-ERF    | TF |
| F01_cb12021_c7/f5p1/1295-0F  | AP2/ERF-ERF    | TF |
| F01_cb12021_c8/f13p1/1264-2F | AP2/ERF-ERF    | TF |
| F01_cb12067_c0/f5p0/843-2F   | SWI/SNF-BAF60b | TR |
| F01_cb12067_c1/f1p0/1279-1F  | SWI/SNF-BAF60b | TR |
| F01_cb12067_c1/f1p0/1279-1R  | SWI/SNF-BAF60b | TR |
| F01_cb12067_c2/f1p1/868-1F   | SWI/SNF-BAF60b | TR |
| F01_cb12110_c0/f2p0/1171-1F  | Others         | TR |
| F01_cb12113_c0/f8p0/1020-0F  | AP2/ERF-ERF    | TF |
| F01_cb12113_c1/f1p0/997-2F   | AP2/ERF-ERF    | TF |
| F01_cb12113_c4/f1p0/1121-2F  | AP2/ERF-ERF    | TF |
| F01_cb12149_c11/f1p5/1234-0F | AUX/IAA        | TR |
| F01_cb12149_c11/f1p5/1234-1F | AUX/IAA        | TR |
| F01_cb12149_c17/f1p0/1518-0F | AUX/IAA        | TR |
| F01_cb12149_c17/f1p0/1518-2F | AUX/IAA        | TR |
| F01_cb12149_c18/f1p1/1166-0F | AUX/IAA        | TR |

---

---

|                              |             |    |
|------------------------------|-------------|----|
| F01_cb12149_c19/flp0/1285-1F | AUX/IAA     | TR |
| F01_cb12149_c20/flp1/1039-2F | AUX/IAA     | TR |
| F01_cb12149_c23/flp1/1192-2F | AUX/IAA     | TR |
| F01_cb12149_c24/flp0/1452-1F | AUX/IAA     | TR |
| F01_cb12149_c25/flp2/1155-0F | AUX/IAA     | TR |
| F01_cb12149_c26/flp1/1021-0F | AUX/IAA     | TR |
| F01_cb12149_c28/flp0/1090-0F | AUX/IAA     | TR |
| F01_cb12149_c28/flp0/1090-1F | AUX/IAA     | TR |
| F01_cb12149_c29/flp0/1255-0F | AUX/IAA     | TR |
| F01_cb12149_c31/flp0/1050-2F | AUX/IAA     | TR |
| F01_cb12149_c36/flp0/1338-0F | AUX/IAA     | TR |
| F01_cb12149_c37/f2p3/1146-1F | AUX/IAA     | TR |
| F01_cb12149_c8/f3p5/1188-0F  | AUX/IAA     | TR |
| F01_cb12150_c0/flp0/1763-1F  | AP2/ERF-ERF | TF |
| F01_cb12150_c2/flp0/1017-2F  | AP2/ERF-ERF | TF |
| F01_cb12150_c3/flp0/1758-2F  | AP2/ERF-ERF | TF |
| F01_cb12181_c2/flp0/1479-1F  | NAC         | TF |
| F01_cb12181_c3/flp0/1159-2F  | NAC         | TF |
| F01_cb12181_c4/flp0/1570-1F  | NAC         | TF |
| F01_cb12214_c10/flp0/1297-0F | MYB         | TF |
| F01_cb12214_c5/flp0/1243-2F  | MYB         | TF |
| F01_cb12230_c1/flp1/1499-2F  | BES1        | TF |
| F01_cb12230_c11/f3p0/1406-1F | BES1        | TF |
| F01_cb12230_c7/flp0/1675-0F  | BES1        | TF |
| F01_cb12323_c1/f25p0/788-0F  | MBF1        | TR |
| F01_cb12323_c11/flp0/758-0F  | MBF1        | TR |

---

---

|                             |              |    |
|-----------------------------|--------------|----|
| F01_cb12323_c14/f7p0/808-2F | MBF1         | TR |
| F01_cb12323_c17/f8p0/705-2F | MBF1         | TR |
| F01_cb12323_c9/f1p0/877-1F  | MBF1         | TR |
| F01_cb12377_c0/f2p0/1601-0F | TRAF         | TR |
| F01_cb12377_c1/f1p0/1751-1F | TRAF         | TR |
| F01_cb1240_c10/f1p1/3810-0F | Others       | TR |
| F01_cb1240_c10/f1p1/3810-2F | Others       | TR |
| F01_cb1240_c16/f1p0/3942-0F | Others       | TR |
| F01_cb1240_c17/f1p0/4879-0F | Others       | TR |
| F01_cb1240_c2/f3p1/4343-1F  | Others       | TR |
| F01_cb1240_c22/f1p0/4522-1F | Others       | TR |
| F01_cb1240_c3/f1p1/4420-1F  | Others       | TR |
| F01_cb1240_c4/f1p1/4081-2F  | Others       | TR |
| F01_cb1240_c6/f1p0/4543-1F  | Others       | TR |
| F01_cb1240_c7/f1p0/3554-2F  | Others       | TR |
| F01_cb12485_c0/f2p0/1365-1F | Trihelix     | TF |
| F01_cb12497_c0/f3p0/1607-2F | HSF          | TF |
| F01_cb12505_c1/f1p1/853-1F  | HMG          | TR |
| F01_cb12505_c10/f7p0/816-2F | HMG          | TR |
| F01_cb12505_c4/f1p0/1745-2F | HMG          | TR |
| F01_cb12505_c6/f1p0/868-0F  | HMG          | TR |
| F01_cb12505_c7/f1p0/1718-2F | HMG          | TR |
| F01_cb12545_c2/f1p0/1662-1F | bZIP         | TF |
| F01_cb12545_c3/f1p0/1749-2F | bZIP         | TF |
| F01_cb1254_c13/f1p2/3019-1F | Pseudo ARR-B | TR |
| F01_cb1254_c17/f1p1/2619-0F | Others       | TR |

---

---

|                               |              |    |
|-------------------------------|--------------|----|
| F01_cb1254_c17/f1p1/2619-2F   | Others       | TR |
| F01_cb1254_c20/f1p0/2893-0F   | Pseudo ARR-B | TR |
| F01_cb1254_c27/f3p3/2944-2F   | Pseudo ARR-B | TR |
| F01_cb1254_c5/f2p3/2995-0F    | Pseudo ARR-B | TR |
| F01_cb1254_c7/f1p0/4411-0F    | Others       | TR |
| F01_cb1254_c7/f1p0/4411-2F    | Others       | TR |
| F01_cb1254_c8/f1p1/4309-2F    | Others       | TR |
| F01_cb12578_c11/f1p0/1792-0F  | AUX/IAA      | TR |
| F01_cb12578_c11/f1p0/1792-1F  | AUX/IAA      | TR |
| F01_cb12578_c12/f1p0/1877-1F  | AUX/IAA      | TR |
| F01_cb12578_c12/f1p0/1877-2F  | AUX/IAA      | TR |
| F01_cb12578_c13/f1p0/1790-1F  | AUX/IAA      | TR |
| F01_cb12578_c18/f1p0/1805-0F  | AUX/IAA      | TR |
| F01_cb12578_c18/f1p0/1805-1F  | AUX/IAA      | TR |
| F01_cb12578_c20/f1p1/1703-2F  | AUX/IAA      | TR |
| F01_cb12578_c21/f1p1/1749-2F  | AUX/IAA      | TR |
| F01_cb12578_c24/f3p3/1752-1F  | AUX/IAA      | TR |
| F01_cb12578_c28/f18p0/1731-0F | AUX/IAA      | TR |
| F01_cb12578_c31/f1p2/1777-1F  | AUX/IAA      | TR |
| F01_cb12578_c31/f1p2/1777-2F  | AUX/IAA      | TR |
| F01_cb12586_c0/f2p0/1428-0F   | PHD          | TR |
| F01_cb12586_c1/f1p0/1542-1F   | PHD          | TR |
| F01_cb12586_c2/f1p0/1542-0F   | PHD          | TR |
| F01_cb12586_c4/f1p0/1346-0F   | PHD          | TR |
| F01_cb12586_c5/f1p0/1583-2F   | PHD          | TR |
| F01_cb12588_c2/f1p0/1199-1F   | WRKY         | TF |

---

---

|                              |                |    |
|------------------------------|----------------|----|
| F01_cb12633_c1/f2p0/1594-0F  | WRKY           | TF |
| F01_cb12633_c5/f1p0/1544-0F  | WRKY           | TF |
| F01_cb12633_c6/f1p0/1839-0F  | WRKY           | TF |
| F01_cb12724_c0/f1p0/762-2F   | GNAT           | TR |
| F01_cb12724_c1/f1p0/858-0F   | GNAT           | TR |
| F01_cb12731_c1/f1p0/689-0F   | SWI/SNF-BAF60b | TR |
| F01_cb12768_c1/f2p2/1148-1F  | AP2/ERF-ERF    | TF |
| F01_cb12768_c2/f1p2/1248-2F  | AP2/ERF-ERF    | TF |
| F01_cb12768_c7/f1p1/1430-0F  | AP2/ERF-ERF    | TF |
| F01_cb12768_c8/f1p2/1260-2F  | AP2/ERF-ERF    | TF |
| F01_cb12785_c13/f1p0/912-0F  | C3H            | TF |
| F01_cb12785_c14/f1p0/1127-1F | C3H            | TF |
| F01_cb12785_c16/f1p0/1203-0F | C3H            | TF |
| F01_cb12785_c19/f1p0/1005-0F | C3H            | TF |
| F01_cb12785_c21/f1p0/843-1F  | C3H            | TF |
| F01_cb12785_c26/f1p0/1428-1F | C3H            | TF |
| F01_cb12785_c29/f9p1/969-2F  | C3H            | TF |
| F01_cb12785_c32/f13p0/989-0F | C3H            | TF |
| F01_cb12785_c35/f1p0/980-2F  | C3H            | TF |
| F01_cb12785_c36/f1p0/1093-1F | C3H            | TF |
| F01_cb12785_c37/f2p1/929-1F  | C3H            | TF |
| F01_cb12785_c9/f1p1/1033-2F  | C3H            | TF |
| F01_cb12802_c0/f1p0/1125-0F  | GARP-G2-like   | TF |
| F01_cb12802_c1/f1p0/1587-1F  | GARP-G2-like   | TF |
| F01_cb12828_c1/f1p1/1807-0F  | Trihelix       | TF |
| F01_cb12828_c5/f1p1/1544-0F  | Trihelix       | TF |

---

---

|                               |             |    |
|-------------------------------|-------------|----|
| F01_cb12869_c14/f4p0/1664-1F  | bHLH        | TF |
| F01_cb12869_c15/f12p0/1600-1F | bHLH        | TF |
| F01_cb12869_c3/f1p0/1671-2F   | bHLH        | TF |
| F01_cb12869_c7/f1p0/1799-1F   | bHLH        | TF |
| F01_cb12869_c9/f1p0/1617-0F   | bHLH        | TF |
| F01_cb12883_c3/f3p2/871-2F    | GNAT        | TR |
| F01_cb12883_c4/f1p0/506-0F    | GNAT        | TR |
| F01_cb12883_c5/f1p0/771-2F    | GNAT        | TR |
| F01_cb12883_c6/f1p2/761-1F    | GNAT        | TR |
| F01_cb12883_c7/f1p2/949-0F    | GNAT        | TR |
| F01_cb12883_c8/f1p2/753-2F    | GNAT        | TR |
| F01_cb1291_c14/f1p0/2892-1F   | TRAF        | TR |
| F01_cb1291_c19/f1p0/2699-2F   | TRAF        | TR |
| F01_cb1291_c2/f6p1/2729-2F    | TRAF        | TR |
| F01_cb1291_c4/f1p1/4391-0F    | TRAF        | TR |
| F01_cb1291_c5/f1p0/4325-2F    | TRAF        | TR |
| F01_cb1291_c6/f1p0/2480-2F    | TRAF        | TR |
| F01_cb1291_c7/f1p1/2985-0F    | TRAF        | TR |
| F01_cb1291_c9/f1p1/2168-1F    | TRAF        | TR |
| F01_cb12928_c0/f4p1/1334-0F   | C2C2-Dof    | TF |
| F01_cb12928_c1/f1p1/1524-1F   | C2C2-Dof    | TF |
| F01_cb12928_c2/f1p1/1511-0F   | C2C2-Dof    | TF |
| F01_cb12928_c4/f1p0/1350-2F   | C2C2-Dof    | TF |
| F01_cb12936_c0/f1p0/803-1F    | MADS-M-type | TF |
| F01_cb12948_c11/f2p2/1337-2F  | MADS-MIKC   | TF |
| F01_cb12948_c2/f1p0/1497-1F   | MADS-MIKC   | TF |

---



---

|                              |             |    |
|------------------------------|-------------|----|
| F01_cb12948_c4/flp2/1293-1F  | MADS-MIKC   | TF |
| F01_cb12948_c5/flp0/1460-1F  | MADS-MIKC   | TF |
| F01_cb12948_c6/flp0/1788-0R  | MADS-MIKC   | TF |
| F01_cb12948_c6/flp0/1788-2F  | MADS-MIKC   | TF |
| F01_cb12948_c7/flp0/1698-1F  | MADS-MIKC   | TF |
| F01_cb12983_c7/flp2/1542-0F  | HB-HD-ZIP   | TF |
| F01_cb13002_c0/f3p0/1416-1F  | Trihelix    | TF |
| F01_cb13002_c2/flp0/1196-2F  | Trihelix    | TF |
| F01_cb13002_c3/flp0/1329-2F  | Trihelix    | TF |
| F01_cb13038_c0/flp0/1234-1F  | NF-YB       | TF |
| F01_cb13038_c1/flp0/834-0F   | NF-YB       | TF |
| F01_cb13050_c0/flp0/1337-2F  | SBP         | TF |
| F01_cb13050_c1/flp0/1389-0F  | SBP         | TF |
| F01_cb13050_c2/flp0/1389-0F  | SBP         | TF |
| F01_cb13055_c0/f2p1/682-1F   | OFP         | TF |
| F01_cb13055_c2/flp0/583-1F   | OFP         | TF |
| F01_cb13080_c0/f2p0/1164-2F  | bZIP        | TF |
| F01_cb13082_c10/flp0/1535-2F | AP2/ERF-ERF | TF |
| F01_cb13082_c2/f3p0/1615-0F  | AP2/ERF-ERF | TF |
| F01_cb13082_c3/f2p0/1388-2F  | AP2/ERF-ERF | TF |
| F01_cb13082_c9/flp0/1512-0F  | AP2/ERF-ERF | TF |
| F01_cb13095_c1/flp0/1486-0F  | MYB         | TF |
| F01_cb13118_c1/flp0/1111-0F  | GNAT        | TR |
| F01_cb13152_c0/f2p0/1574-0F  | NAC         | TF |
| F01_cb13152_c1/flp0/1388-0F  | NAC         | TF |
| F01_cb13152_c1/flp0/1388-1F  | NAC         | TF |

---

---

|                             |             |    |
|-----------------------------|-------------|----|
| F01_cb13152_c2/f1p0/1560-1F | NAC         | TF |
| F01_cb13164_c0/f4p2/1616-0F | C2C2-GATA   | TF |
| F01_cb13164_c2/f1p1/1514-0F | C2C2-GATA   | TF |
| F01_cb13164_c5/f1p0/1648-2F | C2C2-GATA   | TF |
| F01_cb13215_c0/f2p0/1270-0F | HB-HD-ZIP   | TF |
| F01_cb13243_c2/f1p0/1717-1F | C3H         | TF |
| F01_cb13243_c4/f1p0/1340-2F | C3H         | TF |
| F01_cb13243_c8/f1p0/1759-2F | C3H         | TF |
| F01_cb13243_c9/f7p0/1516-2F | C3H         | TF |
| F01_cb13278_c5/f1p1/1155-1F | MYB-related | TF |
| F01_cb132_c0/f14p0/3618-2F  | RB          | TR |
| F01_cb132_c2/f1p0/4955-2F   | RB          | TR |
| F01_cb132_c3/f1p0/3919-0F   | RB          | TR |
| F01_cb132_c4/f1p0/3541-1F   | RB          | TR |
| F01_cb13338_c1/f3p0/1279-0F | BBR-BPC     | TF |
| F01_cb13338_c6/f1p0/1420-1F | BBR-BPC     | TF |
| F01_cb13338_c7/f4p0/1359-1F | BBR-BPC     | TF |
| F01_cb13390_c4/f1p0/1705-1F | TRAF        | TR |
| F01_cb13390_c4/f1p0/1705-2F | TRAF        | TR |
| F01_cb1339_c0/f2p1/4378-1F  | AUX/IAA     | TR |
| F01_cb1339_c0/f2p1/4378-2F  | B3-ARF      | TF |
| F01_cb1339_c2/f1p0/4262-1F  | B3          | TF |
| F01_cb1339_c2/f1p0/4262-2F  | AUX/IAA     | TR |
| F01_cb1339_c4/f1p0/4235-2F  | B3-ARF      | TF |
| F01_cb1339_c8/f1p1/3971-2F  | B3          | TF |
| F01_cb1339_c9/f1p0/3837-1F  | B3          | TF |

---

---

|                             |          |    |
|-----------------------------|----------|----|
| F01_cb133_c2/flp0/3610-2F   | DDT      | TR |
| F01_cb133_c4/flp0/5829-0F   | HB-other | TF |
| F01_cb133_c5/flp2/5631-2F   | HB-other | TF |
| F01_cb133_c6/flp2/5625-0F   | DDT      | TR |
| F01_cb133_c6/flp2/5625-1F   | HB-other | TF |
| F01_cb133_c7/flp1/5392-1F   | DDT      | TR |
| F01_cb133_c7/flp1/5392-2F   | HB-other | TF |
| F01_cb13402_c0/f5p1/1791-1F | bZIP     | TF |
| F01_cb13402_c2/flp1/1835-1F | bZIP     | TF |
| F01_cb13402_c3/flp0/1665-1F | bZIP     | TF |
| F01_cb13402_c4/flp0/1547-0F | bZIP     | TF |
| F01_cb13402_c5/flp0/1841-0F | bZIP     | TF |
| F01_cb1340_c0/f3p0/1559-2F  | mTERF    | TR |
| F01_cb1340_c1/flp0/4356-1F  | mTERF    | TR |
| F01_cb1340_c2/flp0/3014-0F  | mTERF    | TR |
| F01_cb1340_c2/flp0/3014-2F  | mTERF    | TR |
| F01_cb1340_c3/flp0/2373-0F  | mTERF    | TR |
| F01_cb1340_c4/flp0/1977-0F  | mTERF    | TR |
| F01_cb1340_c5/flp0/1572-1F  | mTERF    | TR |
| F01_cb1340_c6/flp0/1564-0F  | mTERF    | TR |
| F01_cb13412_c2/flp2/1715-1F | NAC      | TF |
| F01_cb1341_c2/flp1/2875-1F  | HB-BELL  | TF |
| F01_cb1341_c3/flp1/2271-0F  | HB-other | TF |
| F01_cb1341_c4/flp0/2383-1F  | HB-BELL  | TF |
| F01_cb1341_c5/flp1/2310-2F  | HB-BELL  | TF |
| F01_cb13423_c1/flp0/1833-1F | NAC      | TF |

---

---

|                               |             |    |
|-------------------------------|-------------|----|
| F01_cb13433_c123/f1p0/5867-2F | MYB-related | TF |
| F01_cb13433_c126/f1p0/5680-1F | MYB-related | TF |
| F01_cb13433_c127/f1p0/5721-1F | MYB-related | TF |
| F01_cb13433_c41/f1p0/1701-0F  | SRS         | TF |
| F01_cb13433_c53/f1p0/4827-1F  | MYB-related | TF |
| F01_cb13433_c54/f1p0/6911-2F  | MYB-related | TF |
| F01_cb13433_c57/f1p0/6389-1F  | MYB-related | TF |
| F01_cb13456_c11/f1p0/1489-1F  | PLATZ       | TF |
| F01_cb13456_c11/f1p0/1489-2F  | PLATZ       | TF |
| F01_cb13456_c12/f3p1/1486-2F  | PLATZ       | TF |
| F01_cb13456_c13/f7p1/1403-2F  | PLATZ       | TF |
| F01_cb13456_c2/f2p1/1279-0F   | PLATZ       | TF |
| F01_cb13456_c4/f1p1/1442-0F   | PLATZ       | TF |
| F01_cb13499_c0/f5p1/1128-2F   | AUX/IAA     | TR |
| F01_cb13499_c1/f4p1/1133-1F   | AUX/IAA     | TR |
| F01_cb13499_c3/f1p0/1450-0F   | AUX/IAA     | TR |
| F01_cb13499_c3/f1p0/1450-1F   | AUX/IAA     | TR |
| F01_cb13499_c6/f1p0/1088-2F   | AUX/IAA     | TR |
| F01_cb13516_c0/f10p1/1137-2F  | AUX/IAA     | TR |
| F01_cb13516_c1/f4p1/1207-0F   | AUX/IAA     | TR |
| F01_cb13516_c4/f1p0/1066-0F   | AUX/IAA     | TR |
| F01_cb13516_c6/f1p0/1306-0F   | AUX/IAA     | TR |
| F01_cb13516_c7/f1p0/1058-1F   | AUX/IAA     | TR |
| F01_cb13516_c8/f1p0/1141-1F   | AUX/IAA     | TR |
| F01_cb13587_c0/f1p0/1563-0F   | DBP         | TF |
| F01_cb13587_c1/f1p0/1516-0F   | DBP         | TF |

---

---

|                              |             |    |
|------------------------------|-------------|----|
| F01_cb13600_c0/f3p0/1089-0F  | Whirly      | TF |
| F01_cb13600_c1/f1p0/1023-2F  | Whirly      | TF |
| F01_cb13608_c1/f3p0/1005-2F  | AUX/IAA     | TR |
| F01_cb13608_c5/f1p0/1088-0F  | AUX/IAA     | TR |
| F01_cb13608_c6/f1p0/1530-0F  | AUX/IAA     | TR |
| F01_cb13608_c6/f1p0/1530-2F  | AUX/IAA     | TR |
| F01_cb13622_c1/f1p1/1313-2F  | AP2/ERF-ERF | TF |
| F01_cb13622_c3/f1p0/1028-0F  | AP2/ERF-ERF | TF |
| F01_cb13622_c5/f1p0/1218-0F  | AP2/ERF-ERF | TF |
| F01_cb13675_c1/f1p0/417-1F   | C2H2        | TF |
| F01_cb13675_c2/f1p0/792-0F   | C2H2        | TF |
| F01_cb13675_c2/f1p0/792-2R   | C2H2        | TF |
| F01_cb13675_c3/f1p0/996-2F   | C2H2        | TF |
| F01_cb13679_c10/f1p0/1618-1F | AUX/IAA     | TR |
| F01_cb13679_c13/f5p0/1060-2F | AUX/IAA     | TR |
| F01_cb13679_c6/f1p0/875-0F   | AUX/IAA     | TR |
| F01_cb13681_c2/f2p0/1375-1F  | MYB-related | TF |
| F01_cb13681_c5/f1p3/1426-2F  | MYB-related | TF |
| F01_cb13707_c1/f1p0/1697-1F  | TAZ         | TR |
| F01_cb13707_c2/f1p0/1046-0F  | TRAF        | TR |
| F01_cb13707_c4/f4p0/1730-0F  | TAZ         | TR |
| F01_cb13720_c13/f1p1/1127-2F | AUX/IAA     | TR |
| F01_cb13720_c16/f1p1/1060-0F | AUX/IAA     | TR |
| F01_cb13720_c16/f1p1/1060-1F | AUX/IAA     | TR |
| F01_cb13720_c16/f1p1/1060-2F | AUX/IAA     | TR |
| F01_cb13720_c2/f4p1/1182-2F  | AUX/IAA     | TR |

---

---

|                              |           |    |
|------------------------------|-----------|----|
| F01_cb13720_c3/flp1/1053-2F  | AUX/IAA   | TR |
| F01_cb13720_c5/f2p1/1064-0F  | AUX/IAA   | TR |
| F01_cb13720_c5/f2p1/1064-2F  | AUX/IAA   | TR |
| F01_cb13720_c7/flp1/1247-2F  | AUX/IAA   | TR |
| F01_cb13720_c9/flp0/1300-1F  | AUX/IAA   | TR |
| F01_cb13768_c11/flp0/1372-0F | mTERF     | TR |
| F01_cb13768_c12/flp0/1501-1F | mTERF     | TR |
| F01_cb13768_c13/flp0/1599-2F | mTERF     | TR |
| F01_cb13768_c15/flp0/1469-2F | mTERF     | TR |
| F01_cb13768_c17/flp0/1647-1F | mTERF     | TR |
| F01_cb13768_c18/flp0/1662-2F | mTERF     | TR |
| F01_cb13768_c19/flp0/1537-1F | mTERF     | TR |
| F01_cb13768_c20/flp0/1285-0F | mTERF     | TR |
| F01_cb13768_c20/flp0/1285-1F | mTERF     | TR |
| F01_cb13768_c23/flp0/439-1F  | mTERF     | TR |
| F01_cb13768_c3/f2p0/1777-0F  | mTERF     | TR |
| F01_cb13768_c9/flp0/1801-1F  | mTERF     | TR |
| F01_cb13788_c0/f3p0/1433-0F  | TAZ       | TR |
| F01_cb13788_c0/f3p0/1433-2F  | TRAF      | TR |
| F01_cb13813_c1/flp0/1364-1F  | C2C2-LSD  | TF |
| F01_cb13817_c1/flp0/1446-0F  | MYB       | TF |
| F01_cb13817_c2/flp0/1832-1F  | MYB       | TF |
| F01_cb13858_c1/flp0/1067-1F  | MADS-MIKC | TF |
| F01_cb13858_c2/flp0/1173-2F  | MADS-MIKC | TF |
| F01_cb13877_c1/flp0/1565-0F  | HB-other  | TF |
| F01_cb13877_c4/flp0/1685-2F  | HB-other  | TF |

---

---

|                              |              |    |
|------------------------------|--------------|----|
| F01_cb13882_c0/f9p0/1554-2F  | bZIP         | TF |
| F01_cb13882_c10/f1p0/1690-2F | bZIP         | TF |
| F01_cb13882_c13/f2p1/1651-2F | bZIP         | TF |
| F01_cb13882_c2/f4p0/1574-1F  | bZIP         | TF |
| F01_cb13882_c8/f1p0/1505-1F  | bZIP         | TF |
| F01_cb13892_c10/f1p0/753-1F  | MADS-M-type  | TF |
| F01_cb13892_c11/f1p0/1220-1F | MADS-MIKC    | TF |
| F01_cb13892_c3/f1p0/1261-2F  | MADS-MIKC    | TF |
| F01_cb13892_c4/f1p0/993-2F   | MADS-M-type  | TF |
| F01_cb13892_c5/f1p0/1181-0F  | MADS-MIKC    | TF |
| F01_cb13892_c6/f1p0/1107-1F  | MADS-MIKC    | TF |
| F01_cb13892_c7/f1p0/838-0F   | MADS-MIKC    | TF |
| F01_cb13892_c9/f1p0/765-1F   | MADS-MIKC    | TF |
| F01_cb13900_c0/f2p0/1222-0F  | GARP-G2-like | TF |
| F01_cb13900_c2/f1p0/1186-0F  | GARP-G2-like | TF |
| F01_cb13900_c5/f1p0/1230-1F  | GARP-G2-like | TF |
| F01_cb13900_c6/f1p0/1337-2F  | GARP-G2-like | TF |
| F01_cb13913_c2/f7p1/1581-0F  | BES1         | TF |
| F01_cb13913_c5/f1p0/1472-1F  | BES1         | TF |
| F01_cb13913_c6/f1p1/1684-2F  | BES1         | TF |
| F01_cb13928_c0/f1p0/1540-1F  | NAC          | TF |
| F01_cb13928_c2/f1p0/1648-0F  | NAC          | TF |
| F01_cb13940_c1/f1p0/1605-1F  | bHLH         | TF |
| F01_cb13940_c2/f1p0/1527-0F  | bHLH         | TF |
| F01_cb13960_c0/f1p0/1079-2F  | WRKY         | TF |
| F01_cb13960_c1/f1p0/1634-1F  | WRKY         | TF |

---

---

|                             |              |    |
|-----------------------------|--------------|----|
| F01_cb13960_c3/flp0/1618-0F | WRKY         | TF |
| F01_cb13960_c5/flp0/834-1F  | WRKY         | TF |
| F01_cb13960_c6/flp0/1219-2F | WRKY         | TF |
| F01_cb14000_c0/f2p0/1578-0F | BES1         | TF |
| F01_cb14000_c2/flp0/1474-2F | BES1         | TF |
| F01_cb14000_c3/flp0/1464-1F | BES1         | TF |
| F01_cb14009_c2/flp0/1253-0F | NF-YC        | TF |
| F01_cb14011_c2/flp0/1295-2F | HB-WOX       | TF |
| F01_cb14035_c3/flp1/1261-2F | MYB          | TF |
| F01_cb14035_c8/flp1/1244-2F | MYB          | TF |
| F01_cb14038_c1/f3p0/1022-2F | MYB          | TF |
| F01_cb14045_c6/flp1/1820-2F | GARP-G2-like | TF |
| F01_cb14045_c7/flp0/1601-0F | GARP-G2-like | TF |
| F01_cb14045_c9/f4p0/1537-1F | GARP-G2-like | TF |
| F01_cb14057_c0/f3p0/1252-0F | TRAF         | TR |
| F01_cb14073_c0/flp0/1836-2F | MYB          | TF |
| F01_cb14073_c1/flp0/1318-1F | MYB          | TF |
| F01_cb14073_c2/flp0/1147-1F | MYB          | TF |
| F01_cb14085_c2/flp0/5412-0F | SNF2         | TR |
| F01_cb14085_c2/flp0/5412-1F | SNF2         | TR |
| F01_cb14085_c2/flp0/5412-2F | SNF2         | TR |
| F01_cb14151_c0/flp0/1608-1F | bZIP         | TF |
| F01_cb14151_c1/flp0/1629-1F | bZIP         | TF |
| F01_cb14151_c2/flp0/1544-1F | bZIP         | TF |
| F01_cb14184_c0/f3p0/1551-2F | NAC          | TF |
| F01_cb14184_c1/flp0/1708-0F | NAC          | TF |

---



---

|                             |             |    |
|-----------------------------|-------------|----|
| F01_cb14194_c0/f3p0/1736-1F | AP2/ERF-ERF | TF |
| F01_cb14194_c4/f1p0/1704-2F | AP2/ERF-ERF | TF |
| F01_cb14242_c0/f1p0/1182-1F | MYB-related | TF |
| F01_cb14242_c0/f1p0/1182-2F | MYB-related | TF |
| F01_cb14242_c2/f1p0/1278-0F | MYB         | TF |
| F01_cb14244_c0/f5p1/1104-2F | AP2/ERF-ERF | TF |
| F01_cb14244_c2/f2p1/1102-1F | AP2/ERF-ERF | TF |
| F01_cb14244_c7/f1p0/1153-1F | AP2/ERF-ERF | TF |
| F01_cb14257_c1/f1p0/1851-2F | AUX/IAA     | TR |
| F01_cb14270_c1/f1p0/820-0F  | GNAT        | TR |
| F01_cb14270_c2/f1p0/850-0F  | GNAT        | TR |
| F01_cb14271_c0/f1p0/1758-0F | BES1        | TF |
| F01_cb14271_c1/f1p0/1674-0F | BES1        | TF |
| F01_cb14271_c2/f1p0/1768-1F | BES1        | TF |
| F01_cb14271_c3/f1p0/1762-1F | BES1        | TF |
| F01_cb14298_c3/f2p0/1513-2F | zf-HD       | TF |
| F01_cb14298_c4/f1p0/1447-0F | zf-HD       | TF |
| F01_cb14323_c0/f7p0/1360-2F | HB-HD-ZIP   | TF |
| F01_cb14323_c3/f1p0/1827-1F | HB-HD-ZIP   | TF |
| F01_cb14323_c5/f1p0/1411-2F | HB-other    | TF |
| F01_cb14323_c6/f1p0/1451-1F | HB-HD-ZIP   | TF |
| F01_cb14323_c9/f2p0/770-1F  | HB-HD-ZIP   | TF |
| F01_cb14340_c2/f2p0/987-1F  | HB-HD-ZIP   | TF |
| F01_cb14340_c3/f1p0/1111-0F | HB-HD-ZIP   | TF |
| F01_cb14356_c3/f1p0/1612-1F | AP2/ERF-ERF | TF |
| F01_cb14356_c4/f1p0/1432-2F | AP2/ERF-ERF | TF |

---

---

|                             |              |    |
|-----------------------------|--------------|----|
| F01_cb14356_c5/flp0/1737-0F | AP2/ERF-ERF  | TF |
| F01_cb14369_c2/flp0/1361-2F | C2C2-GATA    | TF |
| F01_cb14375_c0/f2p0/1155-1F | GNAT         | TR |
| F01_cb14375_c1/flp0/1220-1F | GNAT         | TR |
| F01_cb14375_c2/flp0/1291-1F | GNAT         | TR |
| F01_cb14375_c5/flp0/1254-1F | GNAT         | TR |
| F01_cb14375_c7/flp0/1208-1F | GNAT         | TR |
| F01_cb14390_c2/flp0/1596-1F | GeBP         | TF |
| F01_cb14390_c4/flp0/1475-0F | GeBP         | TF |
| F01_cb14390_c6/flp0/1864-1F | GeBP         | TF |
| F01_cb14390_c7/flp0/1392-1F | GeBP         | TF |
| F01_cb14390_c8/flp0/1844-0F | GeBP         | TF |
| F01_cb14397_c0/f3p0/1111-2F | HB-HD-ZIP    | TF |
| F01_cb14397_c2/flp0/1187-2F | HB-HD-ZIP    | TF |
| F01_cb14418_c0/f4p0/1437-0F | AUX/IAA      | TR |
| F01_cb14419_c0/flp0/1531-0F | NAC          | TF |
| F01_cb14419_c1/flp0/1390-1F | NAC          | TF |
| F01_cb14426_c0/f2p0/1445-2F | GARP-G2-like | TF |
| F01_cb14426_c1/f2p0/1310-0F | GARP-G2-like | TF |
| F01_cb14426_c2/flp0/1330-0F | GARP-G2-like | TF |
| F01_cb14458_c1/flp0/1697-1F | WRKY         | TF |
| F01_cb14458_c1/flp0/1697-2F | WRKY         | TF |
| F01_cb14480_c2/flp0/1076-2F | AP2/ERF-ERF  | TF |
| F01_cb14480_c3/flp0/1151-0F | AP2/ERF-ERF  | TF |
| F01_cb14480_c4/flp0/1346-1F | AP2/ERF-ERF  | TF |
| F01_cb14488_c2/flp0/1783-0F | GRAS         | TF |

---

---

|                             |             |    |
|-----------------------------|-------------|----|
| F01_cb14500_c0/flp0/1133-1F | bHLH        | TF |
| F01_cb14500_c1/flp0/968-1F  | bHLH        | TF |
| F01_cb1454_c1/flp0/4317-2F  | B3-ARF      | TF |
| F01_cb1454_c2/flp0/2893-2F  | AUX/IAA     | TR |
| F01_cb1455_c1/flp1/4291-2F  | MYB-related | TF |
| F01_cb1455_c2/flp1/3990-2F  | MYB-related | TF |
| F01_cb14582_c0/flp0/1794-1F | HB-KNOX     | TF |
| F01_cb14582_c3/flp0/1627-0F | HB-KNOX     | TF |
| F01_cb14624_c2/flp0/1232-0F | NF-YC       | TF |
| F01_cb14624_c3/flp0/1110-2F | NF-YC       | TF |
| F01_cb14624_c5/flp0/1323-1F | NF-YC       | TF |
| F01_cb14624_c6/flp0/1171-0F | NF-YC       | TF |
| F01_cb14624_c7/flp0/1180-0F | NF-YC       | TF |
| F01_cb14663_c3/flp0/1061-1F | Others      | TR |
| F01_cb14663_c4/flp0/1635-1F | Others      | TR |
| F01_cb14691_c0/flp0/1259-0F | bZIP        | TF |
| F01_cb14691_c1/flp0/1313-0F | bZIP        | TF |
| F01_cb14691_c2/flp0/967-2F  | bZIP        | TF |
| F01_cb14698_c0/f2p1/1106-0F | MED6        | TR |
| F01_cb14698_c2/flp0/880-0F  | MED6        | TR |
| F01_cb14698_c4/flp0/1691-1F | MED6        | TR |
| F01_cb14735_c0/flp0/1876-1F | HSF         | TF |
| F01_cb14735_c1/flp0/1839-1F | HSF         | TF |
| F01_cb14735_c3/flp1/5303-0F | HSF         | TF |
| F01_cb14745_c2/flp0/1084-1F | NF-YB       | TF |
| F01_cb14745_c3/flp0/1052-1F | NF-YB       | TF |

---

---

|                             |             |    |
|-----------------------------|-------------|----|
| F01_cb1474_c3/flp0/6921-0F  | SNF2        | TR |
| F01_cb14753_c1/f2p0/1551-2F | LOB         | TF |
| F01_cb14753_c3/flp0/1231-1F | LOB         | TF |
| F01_cb14753_c3/flp0/1231-2F | LOB         | TF |
| F01_cb14768_c1/flp0/1282-1F | HSF         | TF |
| F01_cb14811_c0/f2p0/1144-2F | Alfin-like  | TF |
| F01_cb14811_c2/flp0/1208-0F | Alfin-like  | TF |
| F01_cb14829_c4/flp1/1036-1F | MYB         | TF |
| F01_cb14829_c6/flp0/1576-1F | MYB-related | TF |
| F01_cb14852_c0/f4p0/1444-1F | bZIP        | TF |
| F01_cb14852_c1/flp0/1470-2F | bZIP        | TF |
| F01_cb14852_c2/flp0/1434-2F | bZIP        | TF |
| F01_cb14852_c3/flp0/1424-0F | bZIP        | TF |
| F01_cb14873_c2/flp1/1184-0F | AP2/ERF-ERF | TF |
| F01_cb14873_c3/f2p1/1131-2F | AP2/ERF-ERF | TF |
| F01_cb14873_c5/f2p1/1061-0F | AP2/ERF-ERF | TF |
| F01_cb14883_c0/flp0/1402-1F | MYB-related | TF |
| F01_cb14883_c1/flp0/1394-2F | MYB-related | TF |
| F01_cb14883_c2/flp0/1543-0F | MYB-related | TF |
| F01_cb14883_c3/flp0/1454-0F | MYB-related | TF |
| F01_cb14893_c1/flp0/1319-1F | GNAT        | TR |
| F01_cb14893_c3/flp0/1598-1F | GNAT        | TR |
| F01_cb14893_c5/flp0/1307-2F | GNAT        | TR |
| F01_cb14912_c0/flp0/1518-1F | Others      | TR |
| F01_cb14912_c1/flp0/1480-2F | Others      | TR |
| F01_cb14912_c2/flp0/1499-2F | Others      | TR |

---

---

|                             |                |    |
|-----------------------------|----------------|----|
| F01_cb14921_c0/flp3/1047-1F | bHLH           | TF |
| F01_cb14921_c1/flp0/950-1F  | bHLH           | TF |
| F01_cb14931_c2/flp1/1300-0F | DBB            | TF |
| F01_cb14931_c3/flp0/1247-0F | Others         | TR |
| F01_cb14931_c4/flp1/1296-0F | Others         | TR |
| F01_cb14969_c1/flp1/1576-1F | SWI/SNF-BAF60b | TR |
| F01_cb1497_c0/flp1/4300-2F  | PHD            | TR |
| F01_cb1497_c1/flp0/4043-1F  | PHD            | TR |
| F01_cb1497_c3/flp0/4345-2F  | PHD            | TR |
| F01_cb14991_c3/flp0/929-0F  | AUX/IAA        | TR |
| F01_cb14991_c5/flp0/922-0F  | AUX/IAA        | TR |
| F01_cb14991_c6/flp0/897-0F  | AUX/IAA        | TR |
| F01_cb15025_c1/flp0/1819-0F | C3H            | TF |
| F01_cb15025_c1/flp0/1819-1F | C3H            | TF |
| F01_cb15028_c0/flp0/1268-0F | TRAF           | TR |
| F01_cb15028_c2/flp0/1135-1F | TRAF           | TR |
| F01_cb15048_c3/flp2/1121-2F | LIM            | TF |
| F01_cb15052_c0/flp0/1582-1F | C2H2           | TF |
| F01_cb15052_c1/flp0/1709-0F | C2H2           | TF |
| F01_cb15052_c2/flp0/1331-1F | C2H2           | TF |
| F01_cb15106_c0/flp0/1779-1F | Others         | TR |
| F01_cb15106_c5/flp0/884-0F  | Others         | TR |
| F01_cb15127_c1/flp1/1498-0F | MYB            | TF |
| F01_cb15127_c2/flp1/5940-1F | MYB-related    | TF |
| F01_cb15127_c2/flp1/5940-2F | MYB-related    | TF |
| F01_cb15145_c1/flp0/417-2F  | S1Fa-like      | TF |

---

---

|                              |             |    |
|------------------------------|-------------|----|
| F01_cb15145_c2/flp0/608-1F   | S1Fa-like   | TF |
| F01_cb15158_c1/flp0/1266-2F  | NAC         | TF |
| F01_cb15172_c3/f3p1/868-1F   | MBF1        | TR |
| F01_cb15172_c6/flp0/759-0F   | MBF1        | TR |
| F01_cb15185_c0/f4p0/720-0F   | HMG         | TR |
| F01_cb15185_c1/flp0/653-0F   | HMG         | TR |
| F01_cb1519_c5/f3p0/1913-0F   | C3H         | TF |
| F01_cb1523_c0/flp0/4282-0F   | Jumonji     | TR |
| F01_cb1523_c1/flp0/4350-1F   | Jumonji     | TR |
| F01_cb1523_c10/flp0/2714-2F  | Jumonji     | TR |
| F01_cb1523_c12/flp0/2619-0F  | Jumonji     | TR |
| F01_cb1523_c14/flp0/1782-2F  | Jumonji     | TR |
| F01_cb1523_c2/flp0/4204-0F   | Jumonji     | TR |
| F01_cb1523_c2/flp0/4204-1F   | Jumonji     | TR |
| F01_cb1523_c5/flp0/2853-2F   | Jumonji     | TR |
| F01_cb1523_c8/flp0/4424-1F   | Jumonji     | TR |
| F01_cb1523_c9/flp0/2695-2F   | Jumonji     | TR |
| F01_cb15293_c0/flp0/827-2R   | AP2/ERF-ERF | TF |
| F01_cb15293_c1/flp0/760-0R   | AP2/ERF-ERF | TF |
| F01_cb15297_c1/flp0/1662-2F  | AP2/ERF-ERF | TF |
| F01_cb15297_c3/flp0/1138-0F  | AP2/ERF-ERF | TF |
| F01_cb15301_c0/flp0/945-2F   | PHD         | TR |
| F01_cb15301_c2/flp0/849-1F   | PHD         | TR |
| F01_cb15330_c0/fl4p3/1401-1F | PLATZ       | TF |
| F01_cb15330_c3/flp3/1415-2F  | PLATZ       | TF |
| F01_cb15330_c6/flp1/1450-2F  | PLATZ       | TF |

---

---

|                             |         |    |
|-----------------------------|---------|----|
| F01_cb15330_c7/f1p1/1448-0F | PLATZ   | TF |
| F01_cb15357_c2/f1p1/1271-1F | TRAF    | TR |
| F01_cb15357_c4/f7p1/1265-1F | TRAF    | TR |
| F01_cb15393_c4/f1p0/916-0F  | HMG     | TR |
| F01_cb15393_c5/f1p1/836-0F  | HMG     | TR |
| F01_cb15393_c7/f11p1/856-1F | HMG     | TR |
| F01_cb1540_c11/f1p0/3904-1F | AUX/IAA | TR |
| F01_cb1540_c11/f1p0/3904-2F | B3-ARF  | TF |
| F01_cb1540_c14/f1p1/3846-1F | B3-ARF  | TF |
| F01_cb1540_c17/f1p0/3387-2F | B3-ARF  | TF |
| F01_cb1540_c20/f1p0/4038-1F | B3-ARF  | TF |
| F01_cb1540_c23/f1p0/1897-2F | AUX/IAA | TR |
| F01_cb1540_c27/f1p0/3741-0F | B3-ARF  | TF |
| F01_cb1540_c3/f2p0/3962-0F  | B3      | TF |
| F01_cb1540_c31/f1p0/3473-1F | B3-ARF  | TF |
| F01_cb1540_c32/f1p0/3950-1F | B3-ARF  | TF |
| F01_cb1540_c34/f1p0/3880-1F | B3-ARF  | TF |
| F01_cb1540_c35/f1p0/3229-1F | B3-ARF  | TF |
| F01_cb1540_c4/f2p0/3874-2F  | B3-ARF  | TF |
| F01_cb1540_c7/f1p0/4274-2F  | B3      | TF |
| F01_cb15427_c1/f1p0/1149-1F | B3      | TF |
| F01_cb15430_c0/f4p0/1307-0F | zf-HD   | TF |
| F01_cb15435_c0/f1p0/1831-0F | NAC     | TF |
| F01_cb15435_c1/f1p0/1301-2F | NAC     | TF |
| F01_cb15435_c2/f1p0/1732-0F | NAC     | TF |
| F01_cb15435_c3/f1p0/1675-0F | NAC     | TF |

---

---

|                              |             |    |
|------------------------------|-------------|----|
| F01_cb15495_c1/f2p0/1322-0F  | C2H2        | TF |
| F01_cb15495_c10/f1p0/1473-2F | C2H2        | TF |
| F01_cb15495_c2/f1p0/466-2F   | C2H2        | TF |
| F01_cb15495_c3/f1p0/1339-0F  | C2H2        | TF |
| F01_cb15495_c4/f1p0/1107-1F  | C2H2        | TF |
| F01_cb15495_c6/f1p0/1348-2F  | C2H2        | TF |
| F01_cb15498_c0/f2p0/1291-1F  | MYB-related | TF |
| F01_cb15501_c1/f1p0/1232-0F  | AP2/ERF-ERF | TF |
| F01_cb15501_c5/f6p0/1093-1F  | AP2/ERF-ERF | TF |
| F01_cb15521_c0/f2p0/1238-2F  | HB-HD-ZIP   | TF |
| F01_cb15521_c1/f1p0/1283-0F  | HB-HD-ZIP   | TF |
| F01_cb15527_c3/f2p0/1695-2F  | C3H         | TF |
| F01_cb15527_c4/f1p0/1687-1F  | C3H         | TF |
| F01_cb15546_c0/f1p0/1801-0F  | TRAF        | TR |
| F01_cb15546_c1/f1p0/1865-2F  | TRAF        | TR |
| F01_cb15566_c1/f1p0/1589-1F  | SET         | TR |
| F01_cb15572_c2/f1p0/1175-1F  | MYB         | TF |
| F01_cb15572_c3/f1p0/1236-1F  | MYB-related | TF |
| F01_cb15572_c4/f1p0/1278-1F  | MYB         | TF |
| F01_cb15572_c5/f1p0/1537-1F  | MYB         | TF |
| F01_cb15572_c6/f3p0/1241-1F  | MYB         | TF |
| F01_cb15575_c11/f6p2/1520-2F | C2C2-GATA   | TF |
| F01_cb15575_c2/f1p1/1401-1F  | C2C2-GATA   | TF |
| F01_cb15584_c0/f3p0/1259-1F  | LOB         | TF |
| F01_cb15584_c1/f1p0/1269-2F  | LOB         | TF |
| F01_cb15584_c2/f1p0/1708-0F  | LOB         | TF |

---



---

|                             |            |    |
|-----------------------------|------------|----|
| F01_cb15584_c2/f1p0/1708-2F | LOB        | TF |
| F01_cb15584_c4/f1p0/1780-1F | LOB        | TF |
| F01_cb15587_c0/f2p0/1090-0F | Others     | TR |
| F01_cb15591_c1/f1p1/1413-2F | AUX/IAA    | TR |
| F01_cb15591_c3/f1p1/907-1F  | AUX/IAA    | TR |
| F01_cb15591_c7/f1p0/1750-1F | AUX/IAA    | TR |
| F01_cb15591_c9/f1p0/521-0F  | AUX/IAA    | TR |
| F01_cb155_c16/f1p0/6222-2F  | Others     | TR |
| F01_cb155_c20/f1p1/5063-1F  | Others     | TR |
| F01_cb155_c21/f1p0/5298-0F  | Others     | TR |
| F01_cb155_c6/f1p0/4973-1F   | Others     | TR |
| F01_cb15609_c2/f1p0/1578-1F | NF-YA      | TF |
| F01_cb15609_c3/f4p0/1369-1F | NF-YA      | TF |
| F01_cb15617_c0/f2p0/1727-1F | bZIP       | TF |
| F01_cb15628_c0/f7p0/1214-2F | Others     | TR |
| F01_cb15628_c1/f1p0/1207-2F | Others     | TR |
| F01_cb15648_c0/f2p0/1418-1F | NAC        | TF |
| F01_cb15648_c1/f1p0/1430-0F | NAC        | TF |
| F01_cb15649_c0/f5p0/1619-2F | bZIP       | TF |
| F01_cb15649_c1/f1p0/1748-1F | bZIP       | TF |
| F01_cb15652_c0/f1p0/1590-2F | C2C2-Dof   | TF |
| F01_cb15652_c1/f1p0/1797-2F | C2C2-Dof   | TF |
| F01_cb15666_c0/f1p0/1396-1F | GeBP       | TF |
| F01_cb15666_c1/f1p0/1388-1F | GeBP       | TF |
| F01_cb15686_c0/f2p0/1208-1F | Alfin-like | TF |
| F01_cb15686_c1/f1p0/1149-2F | Alfin-like | TF |

---

---

|                             |             |    |
|-----------------------------|-------------|----|
| F01_cb15705_c3/f1p0/1369-2F | NF-YC       | TF |
| F01_cb15705_c4/f1p0/1428-1F | NF-YC       | TF |
| F01_cb15705_c5/f1p0/1357-1F | NF-YC       | TF |
| F01_cb15711_c0/f2p0/1393-2F | C2C2-GATA   | TF |
| F01_cb15733_c0/f2p1/1091-2F | Others      | TR |
| F01_cb15733_c1/f3p1/1136-0F | Others      | TR |
| F01_cb15733_c1/f3p1/1136-2F | Others      | TR |
| F01_cb15739_c0/f2p0/1397-2F | MYB-related | TF |
| F01_cb15739_c1/f1p0/740-1F  | MYB         | TF |
| F01_cb15739_c2/f1p0/1108-0F | MYB-related | TF |
| F01_cb15780_c0/f3p0/1029-0F | C2H2        | TF |
| F01_cb15784_c1/f2p0/1460-2F | C3H         | TF |
| F01_cb15784_c2/f1p0/1655-2F | C3H         | TF |
| F01_cb1579_c0/f2p0/3667-0F  | SNF2        | TR |
| F01_cb1579_c1/f1p0/4261-1F  | SNF2        | TR |
| F01_cb1579_c11/f1p2/3898-0F | SNF2        | TR |
| F01_cb15817_c0/f1p0/957-1F  | Others      | TR |
| F01_cb15817_c2/f1p0/727-1F  | Others      | TR |
| F01_cb15817_c3/f1p0/811-2F  | Others      | TR |
| F01_cb15851_c0/f1p0/996-0F  | NAC         | TF |
| F01_cb15851_c0/f1p0/996-1F  | NAC         | TF |
| F01_cb15851_c1/f1p0/1052-1F | NAC         | TF |
| F01_cb15857_c2/f3p0/1419-2F | WRKY        | TF |
| F01_cb15857_c3/f2p0/1434-1F | WRKY        | TF |
| F01_cb15861_c0/f1p0/1249-2F | C2H2        | TF |
| F01_cb15861_c1/f1p0/1155-2F | C2H2        | TF |

---

---

|                             |             |    |
|-----------------------------|-------------|----|
| F01_cb15875_c0/f2p0/1127-2F | AP2/ERF-ERF | TF |
| F01_cb15875_c1/flp0/1299-0F | AP2/ERF-ERF | TF |
| F01_cb15892_c2/flp0/1522-1F | MYB-related | TF |
| F01_cb15892_c3/flp1/1541-0F | MYB-related | TF |
| F01_cb15905_c4/flp0/1806-0R | MADS-MIKC   | TF |
| F01_cb15919_c0/f3p0/1851-0F | bHLH        | TF |
| F01_cb15938_c0/flp0/1193-1F | MYB         | TF |
| F01_cb1594_c10/flp0/2394-1F | C2H2        | TF |
| F01_cb1594_c11/flp0/2163-2F | C2H2        | TF |
| F01_cb1594_c13/flp0/2343-0F | C2H2        | TF |
| F01_cb1594_c13/flp0/2343-2F | C2H2        | TF |
| F01_cb1594_c14/f5p0/2426-1F | C2H2        | TF |
| F01_cb1594_c15/flp1/2480-2F | C2H2        | TF |
| F01_cb1594_c3/flp0/4277-2F  | C2H2        | TF |
| F01_cb1594_c4/flp0/2740-1F  | C2H2        | TF |
| F01_cb1594_c6/flp1/2130-1F  | C2H2        | TF |
| F01_cb1594_c8/f2p0/2363-1F  | C2H2        | TF |
| F01_cb1594_c9/flp0/2443-0F  | C2H2        | TF |
| F01_cb15980_c0/f3p0/1436-0F | bZIP        | TF |
| F01_cb15980_c2/flp0/1454-2F | bZIP        | TF |
| F01_cb15980_c4/flp0/1687-2F | bZIP        | TF |
| F01_cb16015_c0/flp0/1029-2F | B3          | TF |
| F01_cb16015_c1/flp0/1025-0F | B3          | TF |
| F01_cb16027_c2/flp0/1556-0F | IWS1        | TR |
| F01_cb16027_c4/flp0/1226-1F | IWS1        | TR |
| F01_cb16027_c5/flp0/1555-0F | IWS1        | TR |

---

---

|                              |            |    |
|------------------------------|------------|----|
| F01_cb16031_c0/f3p0/1653-2F  | Trihelix   | TF |
| F01_cb16031_c1/f1p0/1689-0F  | Trihelix   | TF |
| F01_cb16033_c0/f3p0/1401-2F  | Alfin-like | TF |
| F01_cb16033_c10/f1p0/1489-2F | Alfin-like | TF |
| F01_cb16033_c3/f1p0/1307-1F  | Alfin-like | TF |
| F01_cb16033_c4/f1p0/1025-1F  | Alfin-like | TF |
| F01_cb16033_c5/f1p0/1421-1F  | Alfin-like | TF |
| F01_cb16033_c7/f1p0/1696-0F  | Alfin-like | TF |
| F01_cb16033_c8/f1p0/1432-1F  | Alfin-like | TF |
| F01_cb16033_c9/f1p0/1428-2F  | Alfin-like | TF |
| F01_cb16039_c2/f1p0/1094-2F  | MYB        | TF |
| F01_cb16039_c3/f1p0/1218-0F  | MYB        | TF |
| F01_cb16049_c0/f2p0/1336-2F  | C3H        | TF |
| F01_cb16052_c13/f1p0/1376-1F | C3H        | TF |
| F01_cb16052_c19/f1p0/1802-1F | C3H        | TF |
| F01_cb16065_c1/f1p0/1639-1F  | HB-HD-ZIP  | TF |
| F01_cb16085_c1/f2p1/1445-2F  | bHLH       | TF |
| F01_cb16085_c2/f1p1/1448-2F  | bHLH       | TF |
| F01_cb16123_c0/f2p0/1577-0F  | mTERF      | TR |
| F01_cb16123_c0/f2p0/1577-2F  | mTERF      | TR |
| F01_cb16123_c1/f1p0/1678-2F  | mTERF      | TR |
| F01_cb16123_c2/f1p0/1564-1F  | mTERF      | TR |
| F01_cb16125_c4/f1p0/1477-1F  | B3         | TF |
| F01_cb16125_c5/f1p0/1587-2F  | B3         | TF |
| F01_cb16157_c0/f2p0/1546-2F  | TAZ        | TR |
| F01_cb16157_c1/f1p1/1613-1F  | TAZ        | TR |

---

---

|                             |             |    |
|-----------------------------|-------------|----|
| F01_cb16164_c0/flp0/636-0F  | AUX/IAA     | TR |
| F01_cb16164_c1/flp0/1231-2F | AUX/IAA     | TR |
| F01_cb16183_c0/flp0/953-2F  | MYB         | TF |
| F01_cb16183_c1/flp0/1385-1F | MYB-related | TF |
| F01_cb16183_c2/flp0/1040-0F | MYB-related | TF |
| F01_cb16183_c2/flp0/1040-1F | MYB-related | TF |
| F01_cb16183_c3/flp0/1375-2F | MYB         | TF |
| F01_cb16183_c4/flp0/1116-2F | MYB         | TF |
| F01_cb16197_c1/flp0/1654-1F | MYB         | TF |
| F01_cb16212_c0/f2p0/1337-1F | CSD         | TF |
| F01_cb16262_c0/f3p0/880-2F  | AP2/ERF-ERF | TF |
| F01_cb16262_c1/f3p0/926-1F  | AP2/ERF-ERF | TF |
| F01_cb16262_c3/flp0/781-0F  | AP2/ERF-ERF | TF |
| F01_cb16262_c4/flp0/790-2F  | AP2/ERF-ERF | TF |
| F01_cb162_c0/flp0/4942-0F   | Jumonji     | TR |
| F01_cb162_c1/flp0/3584-0F   | Jumonji     | TR |
| F01_cb162_c3/flp0/4680-1F   | Jumonji     | TR |
| F01_cb16348_c0/f3p0/1109-2F | LIM         | TF |
| F01_cb16348_c1/flp0/1024-1F | LIM         | TF |
| F01_cb16348_c2/flp0/1084-2F | LIM         | TF |
| F01_cb16375_c0/flp0/1473-0F | TCP         | TF |
| F01_cb16375_c1/flp0/1380-0F | TCP         | TF |
| F01_cb16375_c3/flp0/1461-2F | TCP         | TF |
| F01_cb16375_c4/flp0/1413-1F | TCP         | TF |
| F01_cb16391_c1/flp0/1230-2F | C2C2-Dof    | TF |
| F01_cb16391_c2/flp0/1496-0F | C2C2-Dof    | TF |

---

---

|                             |             |    |
|-----------------------------|-------------|----|
| F01_cb16393_c0/flp0/1117-1F | FAR1        | TF |
| F01_cb16393_c1/flp0/1053-0F | FAR1        | TF |
| F01_cb16395_c1/flp0/1529-2F | C3H         | TF |
| F01_cb16418_c1/flp0/1698-0F | HB-KNOX     | TF |
| F01_cb16444_c2/flp0/1853-0F | OPF         | TF |
| F01_cb16454_c0/flp0/1347-2F | PLATZ       | TF |
| F01_cb16454_c4/flp1/1168-0F | PLATZ       | TF |
| F01_cb16479_c1/f2p0/1043-1F | C2C2-Dof    | TF |
| F01_cb16479_c3/flp0/1233-0F | C2C2-Dof    | TF |
| F01_cb16479_c4/f2p0/976-2F  | C2C2-Dof    | TF |
| F01_cb16505_c0/f5p0/660-1F  | S1Fa-like   | TF |
| F01_cb16505_c1/flp0/573-1F  | S1Fa-like   | TF |
| F01_cb16546_c0/f2p0/1656-1F | bHLH        | TF |
| F01_cb16551_c0/flp0/746-0F  | AP2/ERF-ERF | TF |
| F01_cb16551_c1/flp0/1140-1F | AP2/ERF-ERF | TF |
| F01_cb16578_c3/flp0/5077-2F | RWP-RK      | TF |
| F01_cb16584_c1/flp0/1103-0F | AP2/ERF-ERF | TF |
| F01_cb16584_c3/flp0/1132-2F | AP2/ERF-ERF | TF |
| F01_cb16589_c0/flp0/1660-1F | C2C2-GATA   | TF |
| F01_cb16599_c0/f5p0/886-0F  | GNAT        | TR |
| F01_cb16599_c2/flp0/1788-2F | GNAT        | TR |
| F01_cb16599_c3/flp0/985-1F  | GNAT        | TR |
| F01_cb16605_c0/flp0/1282-2F | SBP         | TF |
| F01_cb16605_c1/flp0/1630-2F | SBP         | TF |
| F01_cb16655_c2/f2p0/1747-2F | NAC         | TF |
| F01_cb16655_c6/flp0/1804-0F | NAC         | TF |

---

---

|                             |             |    |
|-----------------------------|-------------|----|
| F01_cb16655_c7/flp0/1290-1F | NAC         | TF |
| F01_cb16661_c1/flp0/1630-1F | HB-other    | TF |
| F01_cb16661_c2/flp0/1762-2F | HB-KNOX     | TF |
| F01_cb16661_c3/flp0/1575-0F | HB-KNOX     | TF |
| F01_cb16661_c4/flp0/1762-2F | HB-KNOX     | TF |
| F01_cb16661_c5/flp0/1652-1F | HB-KNOX     | TF |
| F01_cb16661_c6/flp0/1728-2F | HB-KNOX     | TF |
| F01_cb1668_c11/flp0/2234-0F | C3H         | TF |
| F01_cb1668_c11/flp0/2234-1F | C3H         | TF |
| F01_cb1668_c11/flp0/2234-2F | C3H         | TF |
| F01_cb1668_c15/flp0/2586-1F | C3H         | TF |
| F01_cb1668_c17/flp0/1399-0F | C3H         | TF |
| F01_cb1668_c3/flp1/4216-0F  | C3H         | TF |
| F01_cb1668_c3/flp1/4216-2F  | C3H         | TF |
| F01_cb1668_c4/flp1/2924-0F  | C3H         | TF |
| F01_cb1668_c4/flp1/2924-1F  | C3H         | TF |
| F01_cb1668_c5/flp0/2954-2F  | C3H         | TF |
| F01_cb1668_c6/flp0/1907-0F  | C3H         | TF |
| F01_cb1668_c7/flp1/2154-2F  | C3H         | TF |
| F01_cb1668_c8/flp2/2340-0F  | C3H         | TF |
| F01_cb1668_c8/flp2/2340-2F  | C3H         | TF |
| F01_cb16695_c1/flp0/834-0F  | MYB-related | TF |
| F01_cb16695_c2/flp0/872-0F  | MYB-related | TF |
| F01_cb166_c10/flp0/4308-1F  | SBP         | TF |
| F01_cb166_c11/flp0/4188-2F  | SBP         | TF |
| F01_cb166_c16/flp0/4452-2F  | SBP         | TF |

---

---

|                             |             |    |
|-----------------------------|-------------|----|
| F01_cb166_c21/f4p1/4388-2F  | SBP         | TF |
| F01_cb166_c3/f1p1/4936-1F   | SBP         | TF |
| F01_cb166_c6/f1p0/4230-2F   | SBP         | TF |
| F01_cb166_c9/f1p1/4497-1F   | SBP         | TF |
| F01_cb16741_c0/f1p0/1326-2F | MYB         | TF |
| F01_cb16741_c2/f1p0/1262-1F | MYB         | TF |
| F01_cb16747_c1/f2p1/965-1F  | bHLH        | TF |
| F01_cb16749_c0/f9p0/1410-0F | NF-YC       | TF |
| F01_cb16749_c4/f1p0/1491-1F | NF-YC       | TF |
| F01_cb16749_c5/f1p0/1823-1F | NF-YC       | TF |
| F01_cb16749_c7/f1p0/1497-2F | NF-YC       | TF |
| F01_cb16753_c0/f9p3/1466-2F | TUB         | TF |
| F01_cb16802_c2/f1p1/1451-2F | MYB-related | TF |
| F01_cb16802_c3/f1p0/1096-1F | MYB-related | TF |
| F01_cb16802_c6/f1p0/1368-2F | MYB-related | TF |
| F01_cb16802_c8/f1p1/1398-2F | MYB-related | TF |
| F01_cb1680_c10/f1p0/4212-1F | NF-X1       | TF |
| F01_cb1680_c16/f1p0/4127-0F | NF-X1       | TF |
| F01_cb1680_c19/f1p0/3975-2F | NF-X1       | TF |
| F01_cb16820_c0/f2p0/1011-2F | MADS-MIKC   | TF |
| F01_cb16820_c1/f1p0/947-0F  | MADS-MIKC   | TF |
| F01_cb1682_c0/f5p2/3786-0F  | PHD         | TR |
| F01_cb1682_c6/f1p0/3872-2F  | PHD         | TR |
| F01_cb16864_c2/f1p0/1028-2F | FAR1        | TF |
| F01_cb16864_c4/f3p0/921-0F  | FAR1        | TF |
| F01_cb16869_c0/f4p1/1687-1F | bZIP        | TF |

---



---

|                                |           |    |
|--------------------------------|-----------|----|
| F01_cb1688_c10/f1p0/3802-1F    | SNF2      | TR |
| F01_cb1688_c10/f1p0/3802-2F    | SNF2      | TR |
| F01_cb1688_c13/f1p0/2298-0F    | SNF2      | TR |
| F01_cb1688_c3/f1p1/3708-0F     | SNF2      | TR |
| F01_cb1688_c4/f1p1/3873-1F     | SNF2      | TR |
| F01_cb1688_c5/f1p0/3706-1F     | SNF2      | TR |
| F01_cb1688_c8/f1p1/3849-0F     | SNF2      | TR |
| F01_cb1688_c8/f1p1/3849-2F     | SNF2      | TR |
| F01_cb1688_c9/f1p0/3870-0F     | SNF2      | TR |
| F01_cb16902_c0/f6p0/1202-1F    | C2H2      | TF |
| F01_cb16936_c0/f3p0/932-1F     | MADS-MIKC | TF |
| F01_cb16936_c1/f2p0/986-2F     | MADS-MIKC | TF |
| F01_cb16936_c2/f1p0/1507-0F    | MADS-MIKC | TF |
| F01_cb16997_c100/f1p1/3034-0F  | RWP-RK    | TF |
| F01_cb16997_c103/f1p0/2729-1F  | RWP-RK    | TF |
| F01_cb16997_c105/f1p0/2376-0F  | B3-ARF    | TF |
| F01_cb16997_c109/f1p0/3326-0F  | RWP-RK    | TF |
| F01_cb16997_c112/f1p0/2249-0F  | B3-ARF    | TF |
| F01_cb16997_c115/f1p0/2279-1F  | B3-ARF    | TF |
| F01_cb16997_c122/f1p0/2691-2F  | RWP-RK    | TF |
| F01_cb16997_c129/f14p1/2502-0F | B3-ARF    | TF |
| F01_cb16997_c132/f1p1/2143-0F  | B3        | TF |
| F01_cb16997_c132/f1p1/2143-2F  | AUX/IAA   | TR |
| F01_cb16997_c15/f3p0/2493-2F   | RWP-RK    | TF |
| F01_cb16997_c17/f2p0/2331-1F   | RWP-RK    | TF |
| F01_cb16997_c19/f1p0/1620-1F   | RWP-RK    | TF |

---

---

|                              |         |    |
|------------------------------|---------|----|
| F01_cb16997_c23/flp0/6285-1F | RWP-RK  | TF |
| F01_cb16997_c49/flp0/3604-1F | RWP-RK  | TF |
| F01_cb16997_c51/flp0/3275-2F | RWP-RK  | TF |
| F01_cb16997_c53/flp2/2222-1F | B3-ARF  | TF |
| F01_cb16997_c53/flp2/2222-2F | AUX/IAA | TR |
| F01_cb16997_c56/flp0/2394-1F | B3      | TF |
| F01_cb16997_c57/flp0/2337-0F | B3-ARF  | TF |
| F01_cb16997_c58/flp0/2433-1F | B3-ARF  | TF |
| F01_cb16997_c59/flp0/4526-1F | RWP-RK  | TF |
| F01_cb16997_c60/flp0/2509-1F | RWP-RK  | TF |
| F01_cb16997_c62/flp1/2596-2F | RWP-RK  | TF |
| F01_cb16997_c64/flp0/2490-2F | RWP-RK  | TF |
| F01_cb16997_c67/flp0/2441-0F | RWP-RK  | TF |
| F01_cb16997_c69/flp0/2518-2F | RWP-RK  | TF |
| F01_cb16997_c71/flp0/2349-1F | RWP-RK  | TF |
| F01_cb16997_c72/flp0/2574-1F | RWP-RK  | TF |
| F01_cb16997_c77/flp0/2371-2F | RWP-RK  | TF |
| F01_cb16997_c79/flp0/2350-2F | RWP-RK  | TF |
| F01_cb16997_c81/flp0/2411-1F | RWP-RK  | TF |
| F01_cb16997_c84/flp0/2527-2F | RWP-RK  | TF |
| F01_cb16997_c85/flp0/2068-2F | RWP-RK  | TF |
| F01_cb16997_c88/flp0/2985-1F | RWP-RK  | TF |
| F01_cb16997_c89/flp0/2621-2F | RWP-RK  | TF |
| F01_cb16997_c90/flp0/2628-2F | RWP-RK  | TF |
| F01_cb16997_c91/flp0/2673-1F | RWP-RK  | TF |
| F01_cb16997_c92/flp0/2602-2F | RWP-RK  | TF |

---

---

|                              |             |    |
|------------------------------|-------------|----|
| F01_cb16997_c94/f1p0/3198-2F | RWP-RK      | TF |
| F01_cb16997_c96/f1p0/2831-2F | RWP-RK      | TF |
| F01_cb16997_c98/f1p0/2258-2F | RWP-RK      | TF |
| F01_cb16_c0/f1p0/4992-2F     | SNF2        | TR |
| F01_cb16_c1/f1p0/4199-0F     | SNF2        | TR |
| F01_cb16_c6/f1p0/5456-0F     | SNF2        | TR |
| F01_cb16_c7/f1p0/5159-1F     | SNF2        | TR |
| F01_cb16_c8/f1p0/5091-1F     | SNF2        | TR |
| F01_cb17006_c2/f1p0/616-1F   | GNAT        | TR |
| F01_cb17014_c0/f2p0/1137-2F  | GNAT        | TR |
| F01_cb17014_c1/f1p0/1161-1F  | GNAT        | TR |
| F01_cb17056_c0/f1p0/1854-0F  | bHLH        | TF |
| F01_cb17056_c1/f1p0/1827-0F  | bHLH        | TF |
| F01_cb17080_c0/f2p0/1417-2F  | NAC         | TF |
| F01_cb17082_c2/f1p0/1712-2F  | FAR1        | TF |
| F01_cb17082_c3/f1p0/1761-0F  | FAR1        | TF |
| F01_cb17082_c5/f1p0/1165-1F  | FAR1        | TF |
| F01_cb17091_c1/f1p0/1592-2F  | FAR1        | TF |
| F01_cb17091_c2/f1p0/776-1F   | FAR1        | TF |
| F01_cb17091_c4/f1p0/688-2F   | FAR1        | TF |
| F01_cb17091_c5/f1p0/702-1F   | FAR1        | TF |
| F01_cb17099_c0/f2p0/1509-0F  | MYB-related | TF |
| F01_cb17099_c0/f2p0/1509-1F  | MYB-related | TF |
| F01_cb17099_c1/f1p0/1496-2F  | MYB         | TF |
| F01_cb17116_c0/f2p0/1302-1F  | mTERF       | TR |
| F01_cb17116_c2/f1p0/1413-1F  | mTERF       | TR |

---

---

|                             |                |    |
|-----------------------------|----------------|----|
| F01_cb17144_c0/f3p0/1198-1F | MYB-related    | TF |
| F01_cb17144_c1/f1p0/1059-2F | MYB            | TF |
| F01_cb17156_c0/f2p0/1200-0F | MYB-related    | TF |
| F01_cb17157_c0/f2p0/1116-0F | OFP            | TF |
| F01_cb17192_c0/f1p0/969-2F  | SWI/SNF-BAF60b | TR |
| F01_cb17192_c3/f1p0/959-0F  | SWI/SNF-BAF60b | TR |
| F01_cb17192_c4/f1p0/1017-1F | SWI/SNF-BAF60b | TR |
| F01_cb17213_c1/f1p0/1217-1F | WRKY           | TF |
| F01_cb17213_c2/f1p0/1291-1F | WRKY           | TF |
| F01_cb17233_c0/f1p0/1715-0F | WRKY           | TF |
| F01_cb17233_c1/f1p0/1415-0F | WRKY           | TF |
| F01_cb17246_c0/f2p0/969-2F  | NF-YC          | TF |
| F01_cb17255_c2/f1p0/791-1F  | HB-HD-ZIP      | TF |
| F01_cb17255_c4/f1p0/1566-0F | HB-HD-ZIP      | TF |
| F01_cb17255_c5/f1p0/684-1F  | HB-HD-ZIP      | TF |
| F01_cb17261_c0/f1p0/1182-0F | AP2/ERF-ERF    | TF |
| F01_cb17261_c1/f1p0/1202-0F | AP2/ERF-ERF    | TF |
| F01_cb1726_c0/f1p0/4212-1F  | FAR1           | TF |
| F01_cb1726_c2/f1p0/2898-2F  | FAR1           | TF |
| F01_cb1726_c3/f1p0/2976-1F  | FAR1           | TF |
| F01_cb1726_c4/f1p0/2596-0F  | FAR1           | TF |
| F01_cb17285_c0/f1p0/1339-2F | MYB            | TF |
| F01_cb17289_c0/f1p0/1053-0F | GNAT           | TR |
| F01_cb17289_c1/f1p0/1215-0F | GNAT           | TR |
| F01_cb17310_c0/f2p0/1673-2F | MYB            | TF |
| F01_cb17310_c1/f1p0/1679-1F | MYB            | TF |

---

---

|                             |             |    |
|-----------------------------|-------------|----|
| F01_cb17312_c1/flp0/1797-2F | MYB         | TF |
| F01_cb17312_c2/flp0/1752-1F | MYB         | TF |
| F01_cb17312_c3/flp0/1636-2F | MYB         | TF |
| F01_cb1733_c0/flp0/4190-0F  | MYB         | TF |
| F01_cb1733_c1/flp0/3527-2F  | MYB         | TF |
| F01_cb17355_c0/flp0/1830-2F | GeBP        | TF |
| F01_cb173_c12/flp1/2635-0F  | C3H         | TF |
| F01_cb173_c13/flp0/2536-2F  | C3H         | TF |
| F01_cb173_c16/flp0/2914-0F  | C3H         | TF |
| F01_cb173_c17/flp0/2758-2F  | C3H         | TF |
| F01_cb173_c23/flp0/2812-1F  | C3H         | TF |
| F01_cb173_c34/flp1/2634-0F  | C3H         | TF |
| F01_cb173_c9/flp0/4950-1F   | C3H         | TF |
| F01_cb17433_c0/flp0/1675-0F | NAC         | TF |
| F01_cb17433_c1/flp0/1713-0F | NAC         | TF |
| F01_cb17433_c2/flp0/1600-2F | NAC         | TF |
| F01_cb17473_c0/f2p0/1522-1F | MYB-related | TF |
| F01_cb17473_c0/f2p0/1522-2F | MYB-related | TF |
| F01_cb17473_c1/flp0/1511-2F | MYB         | TF |
| F01_cb17473_c2/flp0/1312-2F | MYB         | TF |
| F01_cb17476_c3/flp0/1241-0F | NF-YA       | TF |
| F01_cb17476_c5/flp0/1359-1F | NF-YA       | TF |
| F01_cb17476_c7/flp0/1500-0F | NF-YA       | TF |
| F01_cb17476_c8/flp0/779-0F  | NF-YA       | TF |
| F01_cb17482_c0/flp0/1390-0F | MYB-related | TF |
| F01_cb17482_c1/flp0/1210-0F | MYB         | TF |

---

---

|                              |             |    |
|------------------------------|-------------|----|
| F01_cb17482_c2/flp0/1228-2F  | MYB         | TF |
| F01_cb17496_c1/flp0/971-0F   | GNAT        | TR |
| F01_cb17496_c2/flp0/853-0F   | GNAT        | TR |
| F01_cb17496_c3/flp0/877-2F   | GNAT        | TR |
| F01_cb17515_c1/flp1/1273-1F  | MADS-MIKC   | TF |
| F01_cb17521_c1/flp1/1478-0F  | HB-other    | TF |
| F01_cb17521_c2/flp0/1637-1F  | HB-HD-ZIP   | TF |
| F01_cb17607_c1/flp0/1249-2R  | C3H         | TF |
| F01_cb17624_c0/flp1/1178-2F  | AP2/ERF-ERF | TF |
| F01_cb17634_c1/flp0/1420-0F  | MADS-MIKC   | TF |
| F01_cb1763_c1/flp0/3004-1F   | RWP-RK      | TF |
| F01_cb1763_c3/flp0/2029-1F   | RWP-RK      | TF |
| F01_cb17641_c2/flp0/1589-0F  | mTERF       | TR |
| F01_cb17645_c0/f5p0/1152-0F  | CSD         | TF |
| F01_cb17666_c1/flp0/1114-2F  | LOB         | TF |
| F01_cb17711_c0/flp0/1292-2F  | bZIP        | TF |
| F01_cb17711_c1/flp0/1361-1F  | bZIP        | TF |
| F01_cb17711_c2/flp0/1797-0F  | bZIP        | TF |
| F01_cb17714_c0/flp0/1519-1F  | C2H2        | TF |
| F01_cb17744_c14/flp0/4249-1F | C3H         | TF |
| F01_cb17744_c14/flp0/4249-2F | C3H         | TF |
| F01_cb17744_c15/flp0/4007-2F | C3H         | TF |
| F01_cb17744_c16/flp0/3043-2F | C3H         | TF |
| F01_cb17744_c17/flp0/3235-0F | C3H         | TF |
| F01_cb17744_c18/flp0/2301-0F | C3H         | TF |
| F01_cb17744_c19/flp1/1451-0F | DBB         | TF |

---

---

|                               |             |    |
|-------------------------------|-------------|----|
| F01_cb17744_c21/flp1/1357-1F  | DBB         | TF |
| F01_cb17744_c27/flp0/1267-1F  | DBB         | TF |
| F01_cb17744_c35/flp0/1190-1F  | Others      | TR |
| F01_cb17744_c36/flp0/1185-0F  | Others      | TR |
| F01_cb17744_c37/flp0/1184-1F  | Others      | TR |
| F01_cb17744_c38/flp0/1113-1F  | DBB         | TF |
| F01_cb17744_c39/flp0/1107-1F  | DBB         | TF |
| F01_cb17744_c40/flp0/1078-2F  | DBB         | TF |
| F01_cb17744_c41/flp0/1040-1F  | DBB         | TF |
| F01_cb17744_c47/f59p1/1275-1F | DBB         | TF |
| F01_cb17744_c5/f3p0/1270-0F   | DBB         | TF |
| F01_cb17744_c8/flp0/447-2F    | Others      | TR |
| F01_cb17753_c0/f2p0/1256-2F   | C2H2        | TF |
| F01_cb17753_c1/flp0/1295-1F   | C2H2        | TF |
| F01_cb17756_c19/flp0/1743-2R  | bHLH        | TF |
| F01_cb17770_c0/flp0/1374-1F   | HSF         | TF |
| F01_cb17770_c1/flp0/1278-2F   | HSF         | TF |
| F01_cb17774_c0/flp0/1663-1F   | B3          | TF |
| F01_cb17774_c1/flp0/1619-0F   | B3          | TF |
| F01_cb17807_c1/flp0/941-0F    | AP2/ERF-ERF | TF |
| F01_cb17823_c0/flp0/1685-2R   | C3H         | TF |
| F01_cb17823_c1/flp0/1495-1R   | C3H         | TF |
| F01_cb17835_c1/flp0/970-0F    | bHLH        | TF |
| F01_cb17840_c0/flp0/1111-0F   | HB-KNOX     | TF |
| F01_cb17858_c1/flp0/1806-1F   | GRAS        | TF |
| F01_cb17862_c0/flp0/1730-2F   | NF-YA       | TF |

---

---

|                             |              |    |
|-----------------------------|--------------|----|
| F01_cb17862_c2/flp0/1771-2F | NF-YA        | TF |
| F01_cb17862_c4/flp0/1707-0F | NF-YA        | TF |
| F01_cb17862_c5/flp0/1255-1F | NF-YA        | TF |
| F01_cb17924_c0/flp0/1345-1F | bHLH         | TF |
| F01_cb17965_c1/flp0/976-0F  | Others       | TR |
| F01_cb17977_c0/f2p0/812-0F  | C2C2-GATA    | TF |
| F01_cb17977_c1/flp0/751-2F  | C2C2-GATA    | TF |
| F01_cb17977_c2/flp0/949-0F  | C2C2-GATA    | TF |
| F01_cb18006_c0/flp0/1045-1F | SBP          | TF |
| F01_cb18015_c1/flp0/941-2F  | MYB-related  | TF |
| F01_cb18048_c0/f3p0/1120-1F | AP2/ERF-ERF  | TF |
| F01_cb18048_c3/flp0/1350-0F | AP2/ERF-ERF  | TF |
| F01_cb18052_c0/f2p0/1572-1F | WRKY         | TF |
| F01_cb18052_c1/flp0/1626-2F | WRKY         | TF |
| F01_cb18065_c0/flp0/1830-1R | MYB-related  | TF |
| F01_cb18068_c0/flp0/1290-1F | MADS-MIKC    | TF |
| F01_cb18068_c1/flp0/1274-0F | MADS-MIKC    | TF |
| F01_cb18070_c0/f4p0/1143-2F | C2H2         | TF |
| F01_cb18070_c1/f2p0/1056-1F | C2H2         | TF |
| F01_cb18070_c3/flp0/1199-0F | C2H2         | TF |
| F01_cb18075_c0/flp0/1355-0F | GARP-G2-like | TF |
| F01_cb18075_c1/flp0/1218-1F | GARP-G2-like | TF |
| F01_cb18099_c0/flp0/1413-1F | C2C2-Dof     | TF |
| F01_cb18124_c0/flp0/1449-2F | bHLH         | TF |
| F01_cb18124_c1/flp0/1506-0F | bHLH         | TF |
| F01_cb18124_c2/flp0/1422-0F | bHLH         | TF |

---



---

|                             |             |    |
|-----------------------------|-------------|----|
| F01_cb18125_c1/flp0/1242-1F | AP2/ERF-ERF | TF |
| F01_cb18129_c0/flp0/1391-1F | MYB-related | TF |
| F01_cb18129_c1/flp0/1562-2F | MYB-related | TF |
| F01_cb18133_c0/flp0/1317-2F | bZIP        | TF |
| F01_cb18143_c0/flp0/1740-2F | HSF         | TF |
| F01_cb18143_c1/flp0/1677-1F | HSF         | TF |
| F01_cb18158_c0/flp0/838-1F  | C2H2        | TF |
| F01_cb18158_c1/flp0/571-1F  | C2H2        | TF |
| F01_cb18180_c1/flp0/1225-0F | AP2/ERF-ERF | TF |
| F01_cb18210_c0/flp0/1365-1F | MYB         | TF |
| F01_cb1822_c15/flp0/1826-0F | IWS1        | TR |
| F01_cb1822_c16/flp0/5988-2F | IWS1        | TR |
| F01_cb1822_c17/flp0/5987-2F | IWS1        | TR |
| F01_cb1822_c8/flp2/4358-1F  | IWS1        | TR |
| F01_cb18239_c0/flp0/1709-0F | NF-YA       | TF |
| F01_cb18239_c0/flp0/1709-2F | NF-YA       | TF |
| F01_cb18239_c1/flp0/1475-2F | NF-YA       | TF |
| F01_cb18239_c2/flp0/1454-2F | NF-YA       | TF |
| F01_cb18239_c3/flp0/1627-0F | NF-YA       | TF |
| F01_cb18250_c0/flp0/1093-1F | NAC         | TF |
| F01_cb18250_c1/flp0/1493-0F | NAC         | TF |
| F01_cb18253_c0/flp0/1854-1F | bZIP        | TF |
| F01_cb18253_c1/flp0/1853-0F | bZIP        | TF |
| F01_cb18258_c0/flp0/1135-0F | AUX/IAA     | TR |
| F01_cb18258_c1/flp0/1153-0F | AUX/IAA     | TR |
| F01_cb18277_c0/flp0/1483-0F | C3H         | TF |

---

---

|                               |             |    |
|-------------------------------|-------------|----|
| F01_cb18277_c1/flp0/1534-0F   | C3H         | TF |
| F01_cb18316_c0/flp0/1427-0F   | Trihelix    | TF |
| F01_cb18316_c1/flp0/1406-2F   | Trihelix    | TF |
| F01_cb18330_c1/flp0/1774-1F   | Others      | TR |
| F01_cb18330_c2/flp0/1336-0F   | C2C2-GATA   | TF |
| F01_cb18330_c4/f2p0/1338-0F   | C2C2-GATA   | TF |
| F01_cb18339_c2/flp0/5412-1F   | HMG         | TR |
| F01_cb18366_c1/flp0/898-0F    | NF-YB       | TF |
| F01_cb18366_c2/flp0/818-2F    | NF-YB       | TF |
| F01_cb18366_c3/flp0/845-2F    | NF-YB       | TF |
| F01_cb18367_c0/f2p0/1072-0F   | WRKY        | TF |
| F01_cb18371_c1/flp0/1758-0F   | TRAF        | TR |
| F01_cb18371_c2/flp0/1680-0F   | TRAF        | TR |
| F01_cb18375_c0/flp0/1205-2F   | MADS-MIKC   | TF |
| F01_cb18396_c0/f2p0/1347-0F   | bHLH        | TF |
| F01_cb18403_c0/flp0/1110-1F   | AP2/ERF-ERF | TF |
| F01_cb18403_c1/flp0/997-1F    | AP2/ERF-ERF | TF |
| F01_cb18422_c1/flp0/553-0F    | AUX/IAA     | TR |
| F01_cb18422_c1/flp0/553-2F    | AUX/IAA     | TR |
| F01_cb18422_c2/flp0/1525-2F   | AUX/IAA     | TR |
| F01_cb18429_c0/flp0/796-0F    | bHLH        | TF |
| F01_cb18429_c1/flp0/1155-0F   | bHLH        | TF |
| F01_cb18431_c0/flp0/766-1F    | NF-YB       | TF |
| F01_cb18442_c2/flp0/1878-0F   | TRAF        | TR |
| F01_cb18442_c3/flp0/1737-2F   | TRAF        | TR |
| F01_cb18456_c1147/f6p5/994-1F | MADS-MIKC   | TF |

---

---

|                                |             |    |
|--------------------------------|-------------|----|
| F01_cb18456_c1202/f1p0/946-2F  | MADS-M-type | TF |
| F01_cb18456_c1577/f3p0/769-0F  | MADS-M-type | TF |
| F01_cb18456_c2271/f1p0/1842-1F | MADS-M-type | TF |
| F01_cb18456_c2272/f1p0/1581-0F | MADS-MIKC   | TF |
| F01_cb18456_c2278/f1p0/807-2F  | MADS-M-type | TF |
| F01_cb18456_c2279/f1p1/622-1F  | MADS-M-type | TF |
| F01_cb18456_c2282/f1p1/942-1F  | MADS-MIKC   | TF |
| F01_cb18456_c2284/f1p0/1131-1F | MADS-MIKC   | TF |
| F01_cb18456_c2330/f1p0/644-2F  | C2H2        | TF |
| F01_cb18456_c2341/f1p0/1173-0F | bHLH        | TF |
| F01_cb18456_c6642/f1p0/1248-0F | bHLH        | TF |
| F01_cb18456_c6672/f1p0/620-1F  | C2H2        | TF |
| F01_cb18456_c7283/f1p0/1049-1F | bHLH        | TF |
| F01_cb18456_c7394/f1p0/1133-1R | MADS-M-type | TF |
| F01_cb18456_c7395/f1p1/1610-2R | MADS-MIKC   | TF |
| F01_cb18456_c7528/f1p0/1331-1F | bHLH        | TF |
| F01_cb18465_c0/f2p0/1430-1F    | MADS-MIKC   | TF |
| F01_cb18466_c0/f1p0/1231-2F    | C2H2        | TF |
| F01_cb18488_c0/f2p0/832-0F     | NF-YB       | TF |
| F01_cb18499_c0/f1p0/1716-1F    | AP2/ERF-ERF | TF |
| F01_cb18505_c0/f2p0/1046-1F    | NAC         | TF |
| F01_cb18514_c1/f1p0/1476-0F    | GNAT        | TR |
| F01_cb18525_c0/f1p0/1320-2F    | MADS-MIKC   | TF |
| F01_cb18534_c0/f1p0/1158-2F    | NAC         | TF |
| F01_cb18543_c1/f1p0/6028-0F    | PHD         | TR |
| F01_cb18543_c2/f1p2/5729-1F    | PHD         | TR |

---

---

|                             |                |    |
|-----------------------------|----------------|----|
| F01_cb18543_c5/flp1/5435-2F | PHD            | TR |
| F01_cb1854_c14/flp0/3082-0F | B3-ARF         | TF |
| F01_cb1854_c18/flp0/3004-1F | B3-ARF         | TF |
| F01_cb1854_c25/flp0/3077-1F | B3-ARF         | TF |
| F01_cb1854_c26/flp0/3151-1F | B3-ARF         | TF |
| F01_cb1854_c31/flp0/3117-0F | B3-ARF         | TF |
| F01_cb1854_c34/flp0/3128-2F | B3-ARF         | TF |
| F01_cb1854_c42/flp0/3192-0F | B3-ARF         | TF |
| F01_cb18550_c1/flp0/1534-2F | Trihelix       | TF |
| F01_cb18562_c0/f2p0/1202-2F | AP2/ERF-ERF    | TF |
| F01_cb18577_c2/flp0/1326-2F | TRAF           | TR |
| F01_cb18607_c0/flp0/5858-2F | Others         | TR |
| F01_cb18609_c2/flp0/5334-2F | Others         | TR |
| F01_cb18625_c3/flp1/6280-2F | SNF2           | TR |
| F01_cb18625_c4/flp1/6078-2F | SNF2           | TR |
| F01_cb18631_c0/f2p0/5921-2F | PHD            | TR |
| F01_cb18634_c6/flp0/5260-1F | bHLH           | TF |
| F01_cb18637_c0/flp0/8301-2F | Others         | TR |
| F01_cb18639_c0/f2p0/5077-2F | SWI/SNF-BAF60b | TR |
| F01_cb18657_c2/flp0/5718-1F | C2C2-Dof       | TF |
| F01_cb18667_c0/flp2/5116-1F | Others         | TR |
| F01_cb18667_c2/flp2/5204-2F | Others         | TR |
| F01_cb18685_c0/flp1/7263-2F | SNF2           | TR |
| F01_cb18685_c2/flp1/7183-2F | SNF2           | TR |
| F01_cb18685_c3/flp0/7890-2F | SNF2           | TR |
| F01_cb18685_c6/flp0/7141-0F | SNF2           | TR |

---

---

|                              |                |    |
|------------------------------|----------------|----|
| F01_cb18692_c0/flp0/5018-2F  | SET            | TR |
| F01_cb18729_c1/flp1/1344-2F  | DBB            | TF |
| F01_cb18732_c0/flp0/7623-1F  | PHD            | TR |
| F01_cb18734_c0/flp0/5102-2F  | PHD            | TR |
| F01_cb18744_c1/flp0/3188-2F  | GRAS           | TF |
| F01_cb18746_c0/flp0/4937-1F  | Jumonji        | TR |
| F01_cb18746_c1/flp0/2767-1F  | Jumonji        | TR |
| F01_cb18769_c11/flp0/5395-1F | WRKY           | TF |
| F01_cb18788_c0/flp0/5832-2F  | C2C2-Dof       | TF |
| F01_cb18788_c1/flp0/5403-1F  | C2C2-Dof       | TF |
| F01_cb18793_c1/flp1/6347-0F  | ARID           | TR |
| F01_cb18793_c1/flp1/6347-2F  | PHD            | TR |
| F01_cb18793_c2/flp2/5878-2F  | ARID           | TR |
| F01_cb18795_c0/flp0/5147-1F  | RWP-RK         | TF |
| F01_cb18795_c2/flp1/7526-2F  | RWP-RK         | TF |
| F01_cb18808_c0/flp0/6564-1F  | WRKY           | TF |
| F01_cb18844_c1/flp0/5518-0F  | SWI/SNF-BAF60b | TR |
| F01_cb18848_c0/flp0/5897-1F  | IWS1           | TR |
| F01_cb18848_c1/flp2/5728-1F  | IWS1           | TR |
| F01_cb1892_c0/f3p1/1308-1F   | GeBP           | TF |
| F01_cb1892_c11/flp0/1691-2F  | GeBP           | TF |
| F01_cb1892_c12/flp0/1676-0F  | GeBP           | TF |
| F01_cb1892_c14/flp0/1636-2F  | GeBP           | TF |
| F01_cb1892_c15/flp1/1628-2F  | GeBP           | TF |
| F01_cb1892_c16/flp0/1617-2F  | GeBP           | TF |
| F01_cb1892_c17/flp0/1593-0F  | GeBP           | TF |

---

---

|                             |      |    |
|-----------------------------|------|----|
| F01_cb1892_c18/flp0/1578-1F | GeBP | TF |
| F01_cb1892_c19/flp1/1547-0F | GeBP | TF |
| F01_cb1892_c20/flp0/1622-0F | GeBP | TF |
| F01_cb1892_c22/flp0/1429-2F | GeBP | TF |
| F01_cb1892_c23/flp0/1423-1F | GeBP | TF |
| F01_cb1892_c26/flp0/1317-0F | GeBP | TF |
| F01_cb1892_c6/flp0/1890-1F  | GeBP | TF |
| F01_cb1892_c7/flp2/3204-1F  | GeBP | TF |
| F01_cb1892_c8/flp0/3052-2F  | GeBP | TF |
| F01_cb1892_c9/flp1/3106-2F  | GeBP | TF |
| F01_cb1905_c11/flp0/2713-0F | C3H  | TF |
| F01_cb1905_c12/flp0/3147-1F | C3H  | TF |
| F01_cb1905_c13/flp0/3167-0F | C3H  | TF |
| F01_cb1905_c15/flp0/3162-1F | C3H  | TF |
| F01_cb1905_c19/flp0/2075-0F | C3H  | TF |
| F01_cb1905_c2/f3p0/2454-0F  | C3H  | TF |
| F01_cb1905_c22/flp0/2509-0F | C3H  | TF |
| F01_cb1905_c23/flp0/2032-2F | C3H  | TF |
| F01_cb1905_c24/flp0/2875-0F | C3H  | TF |
| F01_cb1905_c25/flp0/2081-0F | C3H  | TF |
| F01_cb1905_c3/f2p0/2341-0F  | C3H  | TF |
| F01_cb1905_c31/flp0/3100-1F | C3H  | TF |
| F01_cb1905_c34/flp0/2216-0F | C3H  | TF |
| F01_cb1905_c35/flp0/2423-1F | C3H  | TF |
| F01_cb1905_c36/flp0/2252-2F | C3H  | TF |
| F01_cb1905_c37/flp0/2427-1F | C3H  | TF |

---

---

|                             |          |    |
|-----------------------------|----------|----|
| F01_cb1905_c5/f2p0/3069-0F  | C3H      | TF |
| F01_cb1905_c6/f1p0/4127-2F  | C3H      | TF |
| F01_cb1905_c7/f1p0/3406-1F  | C3H      | TF |
| F01_cb1905_c8/f1p0/2229-1F  | C3H      | TF |
| F01_cb1905_c9/f1p0/3045-1F  | C3H      | TF |
| F01_cb1909_c0/f2p0/3866-2F  | RWP-RK   | TF |
| F01_cb1909_c10/f1p0/3896-2F | RWP-RK   | TF |
| F01_cb1909_c12/f1p0/3811-0F | RWP-RK   | TF |
| F01_cb1909_c2/f1p0/3883-2F  | RWP-RK   | TF |
| F01_cb1909_c3/f1p0/3823-1F  | RWP-RK   | TF |
| F01_cb1909_c4/f1p0/3818-0F  | RWP-RK   | TF |
| F01_cb1909_c5/f1p0/3837-0F  | RWP-RK   | TF |
| F01_cb1909_c6/f1p0/3557-0F  | RWP-RK   | TF |
| F01_cb1913_c32/f1p0/3800-2F | Trihelix | TF |
| F01_cb1913_c34/f1p1/2444-1F | Trihelix | TF |
| F01_cb1913_c37/f1p0/2644-0F | Trihelix | TF |
| F01_cb1913_c37/f1p0/2644-2F | Trihelix | TF |
| F01_cb1913_c39/f1p0/2723-2F | Trihelix | TF |
| F01_cb1913_c44/f1p0/2236-0F | Trihelix | TF |
| F01_cb1913_c46/f1p1/2592-2F | Trihelix | TF |
| F01_cb1913_c50/f1p1/2689-0F | Trihelix | TF |
| F01_cb1913_c51/f1p0/2531-2F | Trihelix | TF |
| F01_cb1913_c57/f1p0/2520-0F | Trihelix | TF |
| F01_cb1913_c57/f1p0/2520-1F | Trihelix | TF |
| F01_cb1913_c65/f5p2/2595-1F | Trihelix | TF |
| F01_cb1931_c0/f1p0/4121-1F  | B3-ARF   | TF |

---

---

|                             |              |    |
|-----------------------------|--------------|----|
| F01_cb1931_c1/flp0/2305-1F  | B3-ARF       | TF |
| F01_cb1952_c22/flp1/2726-0F | SET          | TR |
| F01_cb1952_c23/flp1/2727-2F | SET          | TR |
| F01_cb1952_c26/flp1/2800-2F | SET          | TR |
| F01_cb1952_c28/flp0/2974-0F | SET          | TR |
| F01_cb1952_c29/flp0/3038-0F | SET          | TR |
| F01_cb1952_c30/flp1/2397-2F | SET          | TR |
| F01_cb1952_c32/flp1/2394-2F | SET          | TR |
| F01_cb1952_c7/f2p0/2740-2F  | SET          | TR |
| F01_cb1960_c10/f2p0/3006-1F | Pseudo ARR-B | TR |
| F01_cb1960_c12/f2p0/3366-1F | Others       | TR |
| F01_cb1960_c14/flp0/4111-0F | Pseudo ARR-B | TR |
| F01_cb1960_c15/flp1/3038-0F | Others       | TR |
| F01_cb1960_c15/flp1/3038-2F | Others       | TR |
| F01_cb1960_c19/flp1/3084-0F | Others       | TR |
| F01_cb1960_c19/flp1/3084-2F | Others       | TR |
| F01_cb1960_c20/flp0/2337-1F | Pseudo ARR-B | TR |
| F01_cb1960_c24/flp1/2785-0F | Others       | TR |
| F01_cb1960_c24/flp1/2785-2F | Others       | TR |
| F01_cb1960_c28/flp0/3094-0F | Others       | TR |
| F01_cb1960_c28/flp0/3094-1F | Pseudo ARR-B | TR |
| F01_cb1960_c31/flp0/2904-0F | Others       | TR |
| F01_cb1960_c31/flp0/2904-2F | Others       | TR |
| F01_cb1960_c37/flp0/2611-2F | Pseudo ARR-B | TR |
| F01_cb1960_c41/flp1/2517-0F | Others       | TR |
| F01_cb1960_c41/flp1/2517-1F | Others       | TR |

---



---

|                             |              |    |
|-----------------------------|--------------|----|
| F01_cb1960_c42/flp0/3273-2F | Others       | TR |
| F01_cb1960_c43/flp0/3174-1F | Pseudo ARR-B | TR |
| F01_cb1960_c45/flp0/3143-1F | Pseudo ARR-B | TR |
| F01_cb1960_c52/flp0/3141-2F | Pseudo ARR-B | TR |
| F01_cb1960_c58/flp0/2977-2F | Pseudo ARR-B | TR |
| F01_cb1960_c63/flp4/2956-0F | Others       | TR |
| F01_cb1960_c63/flp4/2956-1F | Others       | TR |
| F01_cb1967_c3/flp0/4111-2F  | C2H2         | TF |
| F01_cb1983_c2/flp0/3834-1F  | DDT          | TR |
| F01_cb1983_c3/flp0/3888-2F  | DDT          | TR |
| F01_cb1_c4/flp2/4866-1F     | SNF2         | TR |
| F01_cb1_c5/flp0/4921-0F     | SNF2         | TR |
| F01_cb1_c5/flp0/4921-1F     | SNF2         | TR |
| F01_cb1_c7/flp1/2558-2F     | SNF2         | TR |
| F01_cb1_c8/flp0/4614-0F     | SNF2         | TR |
| F01_cb1_c9/flp1/4998-2F     | SNF2         | TR |
| F01_cb2075_c1/flp0/4053-1F  | EIL          | TF |
| F01_cb2075_c4/flp0/2548-0F  | EIL          | TF |
| F01_cb2075_c7/f2p1/2280-2F  | EIL          | TF |
| F01_cb2084_c11/flp0/2330-2F | bHLH         | TF |
| F01_cb2084_c12/flp0/3016-1F | bHLH         | TF |
| F01_cb2084_c13/flp0/1992-2F | bHLH         | TF |
| F01_cb2084_c14/flp0/2295-2F | bHLH         | TF |
| F01_cb2084_c20/f4p0/2186-1F | bHLH         | TF |
| F01_cb2084_c3/f2p0/2121-2F  | bHLH         | TF |
| F01_cb2084_c5/flp0/2818-0F  | bHLH         | TF |

---

---

|                             |              |    |
|-----------------------------|--------------|----|
| F01_cb2084_c7/f1p0/2088-0F  | bHLH         | TF |
| F01_cb2084_c9/f1p0/2478-2F  | bHLH         | TF |
| F01_cb2122_c10/f2p0/3794-0F | Jumonji      | TR |
| F01_cb2122_c5/f1p0/3100-0F  | Jumonji      | TR |
| F01_cb2122_c6/f1p0/2400-1F  | Jumonji      | TR |
| F01_cb2122_c9/f1p0/3797-1F  | Jumonji      | TR |
| F01_cb2156_c20/f2p3/2707-2F | HB-BELL      | TF |
| F01_cb2156_c31/f1p1/2575-0F | HB-BELL      | TF |
| F01_cb2156_c32/f1p0/2880-0F | HB-BELL      | TF |
| F01_cb2156_c34/f1p0/2846-0F | HB-BELL      | TF |
| F01_cb2156_c46/f1p0/2751-2F | HB-BELL      | TF |
| F01_cb2156_c55/f1p0/2868-2F | HB-BELL      | TF |
| F01_cb2156_c56/f1p0/2935-2F | HB-BELL      | TF |
| F01_cb2156_c57/f1p0/2040-2F | HB-BELL      | TF |
| F01_cb2156_c58/f1p0/2830-2F | HB-other     | TF |
| F01_cb2156_c70/f1p0/3008-0F | HB-BELL      | TF |
| F01_cb2156_c71/f1p0/2653-0F | HB-BELL      | TF |
| F01_cb2172_c11/f1p0/2849-1F | Others       | TR |
| F01_cb2172_c11/f1p0/2849-2F | Others       | TR |
| F01_cb2172_c12/f1p0/3182-1F | Pseudo ARR-B | TR |
| F01_cb2172_c12/f1p0/3182-2F | Others       | TR |
| F01_cb2172_c2/f3p0/2851-1F  | Pseudo ARR-B | TR |
| F01_cb2172_c21/f1p1/2738-2F | Pseudo ARR-B | TR |
| F01_cb2172_c22/f7p1/2799-2F | Pseudo ARR-B | TR |
| F01_cb2172_c5/f2p0/3992-1F  | Pseudo ARR-B | TR |
| F01_cb2172_c8/f1p0/2384-0F  | Pseudo ARR-B | TR |

---

---

|                             |         |    |
|-----------------------------|---------|----|
| F01_cb2172_c9/flp0/2750-2F  | Others  | TR |
| F01_cb2217_c12/flp0/2420-2F | Jumonji | TR |
| F01_cb2217_c13/flp5/3312-0F | Jumonji | TR |
| F01_cb2217_c15/f5p5/3297-0F | Jumonji | TR |
| F01_cb2217_c4/flp4/3161-1F  | Jumonji | TR |
| F01_cb2250_c1/flp1/3997-2F  | PHD     | TR |
| F01_cb2250_c3/flp1/2308-0F  | PHD     | TR |
| F01_cb2250_c8/f3p1/2123-1F  | PHD     | TR |
| F01_cb2285_c10/flp0/2288-1F | C3H     | TF |
| F01_cb2285_c10/flp0/2288-2F | C3H     | TF |
| F01_cb2285_c12/flp0/2111-2F | C3H     | TF |
| F01_cb2285_c14/flp0/2217-2F | C3H     | TF |
| F01_cb2285_c15/flp0/2154-0F | C3H     | TF |
| F01_cb2285_c15/flp0/2154-1F | C3H     | TF |
| F01_cb2285_c15/flp0/2154-2F | C3H     | TF |
| F01_cb2285_c6/flp0/3984-1F  | C3H     | TF |
| F01_cb2285_c6/flp0/3984-2F  | C3H     | TF |
| F01_cb2285_c7/flp0/1969-2F  | C3H     | TF |
| F01_cb2285_c8/flp0/3929-0F  | C3H     | TF |
| F01_cb2285_c8/flp0/3929-2F  | C3H     | TF |
| F01_cb2285_c9/flp0/2005-0F  | C3H     | TF |
| F01_cb2285_c9/flp0/2005-2F  | C3H     | TF |
| F01_cb2295_c2/flp0/2821-1F  | SET     | TR |
| F01_cb2295_c4/flp0/2810-0F  | SET     | TR |
| F01_cb2295_c6/flp0/8328-0F  | SET     | TR |
| F01_cb229_c11/flp1/4779-2F  | SNF2    | TR |

---

---

|                             |        |    |
|-----------------------------|--------|----|
| F01_cb229_c3/f1p1/4847-0F   | SNF2   | TR |
| F01_cb229_c8/f1p1/4650-0F   | SNF2   | TR |
| F01_cb229_c9/f1p0/4601-2F   | SNF2   | TR |
| F01_cb2304_c1/f2p0/2952-0F  | SNF2   | TR |
| F01_cb2304_c10/f1p0/6051-1F | SNF2   | TR |
| F01_cb2304_c9/f1p0/6807-0F  | SNF2   | TR |
| F01_cb2326_c10/f1p0/1746-0F | Tify   | TF |
| F01_cb2326_c19/f7p0/1550-2F | Tify   | TF |
| F01_cb2326_c21/f5p0/1596-0F | Tify   | TF |
| F01_cb2326_c4/f3p0/1682-0F  | Tify   | TF |
| F01_cb2326_c5/f1p0/3979-1F  | Others | TR |
| F01_cb2326_c5/f1p0/3979-2F  | Tify   | TF |
| F01_cb2326_c6/f1p0/3266-0F  | Tify   | TF |
| F01_cb2326_c6/f1p0/3266-1F  | Others | TR |
| F01_cb2326_c7/f1p0/2619-1F  | Tify   | TF |
| F01_cb2326_c7/f1p0/2619-2F  | Others | TR |
| F01_cb2326_c8/f1p0/1998-0F  | Tify   | TF |
| F01_cb2326_c9/f1p0/2051-1F  | Tify   | TF |
| F01_cb2334_c2/f1p0/3969-1F  | C3H    | TF |
| F01_cb2334_c3/f1p0/2839-0F  | C3H    | TF |
| F01_cb2334_c4/f1p0/2425-0F  | C3H    | TF |
| F01_cb2334_c4/f1p0/2425-1F  | C3H    | TF |
| F01_cb2334_c5/f1p0/3343-1F  | C3H    | TF |
| F01_cb2334_c6/f1p0/3333-0F  | C3H    | TF |
| F01_cb2334_c6/f1p0/3333-1F  | C3H    | TF |
| F01_cb2334_c6/f1p0/3333-2F  | C3H    | TF |

---

---

|                             |           |    |
|-----------------------------|-----------|----|
| F01_cb2334_c8/f1p0/1697-1F  | C3H       | TF |
| F01_cb233_c12/f1p0/3006-1F  | SET       | TR |
| F01_cb233_c13/f1p0/2651-0F  | SET       | TR |
| F01_cb233_c15/f1p0/4550-0F  | SET       | TR |
| F01_cb233_c16/f1p0/3723-0F  | SET       | TR |
| F01_cb233_c17/f1p0/3370-2F  | SET       | TR |
| F01_cb233_c18/f1p0/4196-2F  | SET       | TR |
| F01_cb233_c19/f1p0/2802-1F  | SET       | TR |
| F01_cb233_c20/f1p0/3028-1F  | SET       | TR |
| F01_cb233_c22/f1p0/2838-0F  | SET       | TR |
| F01_cb233_c23/f1p0/2935-2F  | SET       | TR |
| F01_cb233_c24/f1p0/3435-2F  | SET       | TR |
| F01_cb233_c27/f1p1/2985-1F  | SET       | TR |
| F01_cb233_c5/f2p0/2943-0F   | SET       | TR |
| F01_cb233_c6/f2p1/3007-0F   | SET       | TR |
| F01_cb233_c7/f1p0/4912-1F   | SET       | TR |
| F01_cb2345_c15/f1p1/2999-0F | HB-HD-ZIP | TF |
| F01_cb2345_c16/f1p0/2882-1F | HB-HD-ZIP | TF |
| F01_cb2345_c2/f2p1/3492-1F  | HB-HD-ZIP | TF |
| F01_cb2345_c3/f1p0/3969-1F  | HB-HD-ZIP | TF |
| F01_cb2345_c4/f1p1/3441-0F  | HB-other  | TF |
| F01_cb2365_c0/f2p0/2949-0F  | B3-ARF    | TF |
| F01_cb2365_c1/f1p0/3963-2F  | B3-ARF    | TF |
| F01_cb2365_c2/f1p0/3184-2F  | B3-ARF    | TF |
| F01_cb2365_c3/f1p0/2982-2F  | B3-ARF    | TF |
| F01_cb2372_c0/f1p0/3991-2F  | Jumonji   | TR |

---

---

|                              |                 |    |
|------------------------------|-----------------|----|
| F01_cb2372_c2/f1p0/4859-0F   | Jumonji         | TR |
| F01_cb2372_c4/f1p0/5505-0F   | Jumonji         | TR |
| F01_cb2376_c10/f1p1/3620-2F  | IWS1            | TR |
| F01_cb2376_c18/f10p1/3642-1F | IWS1            | TR |
| F01_cb2376_c20/f2p1/3661-0F  | IWS1            | TR |
| F01_cb237_c1/f3p1/4388-0F    | SNF2            | TR |
| F01_cb237_c10/f1p0/4733-1F   | SNF2            | TR |
| F01_cb237_c11/f1p0/2052-1F   | SNF2            | TR |
| F01_cb237_c11/f1p0/2052-2F   | SNF2            | TR |
| F01_cb237_c12/f1p0/4420-1F   | SNF2            | TR |
| F01_cb237_c12/f1p0/4420-2F   | SNF2            | TR |
| F01_cb237_c13/f1p0/4633-0F   | SNF2            | TR |
| F01_cb237_c14/f1p0/4353-1F   | SNF2            | TR |
| F01_cb237_c17/f2p0/4311-1F   | SNF2            | TR |
| F01_cb237_c2/f1p0/4913-1F    | SNF2            | TR |
| F01_cb237_c3/f1p1/4828-0F    | SNF2            | TR |
| F01_cb237_c3/f1p1/4828-1F    | SNF2            | TR |
| F01_cb237_c3/f1p1/4828-2F    | SNF2            | TR |
| F01_cb237_c5/f1p0/2911-0F    | SNF2            | TR |
| F01_cb237_c5/f1p0/2911-1F    | SNF2            | TR |
| F01_cb237_c6/f1p0/2903-0F    | SNF2            | TR |
| F01_cb237_c6/f1p0/2903-1F    | SNF2            | TR |
| F01_cb237_c9/f1p0/3796-0F    | SNF2            | TR |
| F01_cb2385_c0/f2p0/3557-1F   | Coactivator p15 | TR |
| F01_cb2385_c1/f1p0/4132-1F   | Coactivator p15 | TR |
| F01_cb2385_c2/f1p0/3690-2F   | Coactivator p15 | TR |

---

---

|                             |           |    |
|-----------------------------|-----------|----|
| F01_cb2406_c0/f2p0/1703-0F  | C2C2-GATA | TF |
| F01_cb2406_c0/f2p0/1703-2F  | Tify      | TF |
| F01_cb2406_c1/f1p0/3763-1F  | C2C2-GATA | TF |
| F01_cb2406_c2/f1p0/2884-0F  | Others    | TR |
| F01_cb2406_c3/f1p1/1625-2F  | C2C2-GATA | TF |
| F01_cb2431_c13/f1p1/5944-0F | IWS1      | TR |
| F01_cb2444_c10/f1p0/3260-1F | C3H       | TF |
| F01_cb2444_c8/f1p0/3369-1F  | C3H       | TF |
| F01_cb2446_c2/f3p0/3727-2F  | SNF2      | TR |
| F01_cb2446_c3/f1p0/3927-0F  | SNF2      | TR |
| F01_cb2446_c4/f1p0/3579-0F  | SNF2      | TR |
| F01_cb2446_c4/f1p0/3579-1F  | SNF2      | TR |
| F01_cb2446_c5/f1p0/3490-1F  | SNF2      | TR |
| F01_cb2446_c8/f1p0/3717-1F  | SNF2      | TR |
| F01_cb2459_c0/f1p0/3919-0F  | B3        | TF |
| F01_cb2459_c0/f1p0/3919-1F  | B3        | TF |
| F01_cb2459_c2/f1p0/1843-0F  | B3        | TF |
| F01_cb2459_c3/f1p0/3534-0F  | B3        | TF |
| F01_cb2459_c4/f1p0/1726-2F  | B3        | TF |
| F01_cb2459_c5/f1p0/1705-1F  | B3        | TF |
| F01_cb2459_c6/f1p0/1744-0F  | B3        | TF |
| F01_cb245_c0/f1p0/4906-1R   | C2H2      | TF |
| F01_cb245_c2/f1p0/4025-1R   | C2H2      | TF |
| F01_cb2474_c0/f1p0/3915-2F  | FAR1      | TF |
| F01_cb2474_c1/f1p0/3818-1F  | FAR1      | TF |
| F01_cb2474_c2/f1p0/3949-1F  | FAR1      | TF |

---

---

|                             |              |    |
|-----------------------------|--------------|----|
| F01_cb2474_c3/f1p0/4162-2F  | FAR1         | TF |
| F01_cb2474_c6/f1p0/3752-0F  | FAR1         | TF |
| F01_cb2474_c6/f1p0/3752-2F  | FAR1         | TF |
| F01_cb2483_c0/f2p0/2861-1F  | C2C2-CO-like | TF |
| F01_cb2483_c1/f1p0/3910-0F  | Others       | TR |
| F01_cb2483_c1/f1p0/3910-1F  | Others       | TR |
| F01_cb2483_c2/f1p0/1912-0F  | Others       | TR |
| F01_cb2483_c2/f1p0/1912-2F  | Others       | TR |
| F01_cb2483_c3/f1p0/3161-1F  | Others       | TR |
| F01_cb2483_c4/f1p0/1785-0F  | C2C2-CO-like | TF |
| F01_cb2488_c1/f1p0/3123-2R  | HB-other     | TF |
| F01_cb2505_c0/f1p0/3821-0F  | Jumonji      | TR |
| F01_cb2505_c0/f1p0/3821-1F  | Jumonji      | TR |
| F01_cb2505_c2/f1p0/3400-1F  | Jumonji      | TR |
| F01_cb2505_c3/f1p0/3388-2F  | Jumonji      | TR |
| F01_cb2505_c4/f1p0/3283-1F  | Jumonji      | TR |
| F01_cb2529_c0/f2p0/3703-2F  | SNF2         | TR |
| F01_cb2529_c5/f1p0/3561-1F  | SNF2         | TR |
| F01_cb2529_c6/f1p0/2581-1F  | SNF2         | TR |
| F01_cb2529_c7/f1p0/5178-2F  | SNF2         | TR |
| F01_cb2533_c16/f1p0/4039-1F | HB-other     | TF |
| F01_cb2533_c17/f1p0/3689-2F | HB-HD-ZIP    | TF |
| F01_cb2533_c20/f1p0/3689-1F | HB-HD-ZIP    | TF |
| F01_cb2533_c26/f1p1/3568-2F | HB-HD-ZIP    | TF |
| F01_cb2533_c28/f1p0/3624-1F | HB-HD-ZIP    | TF |
| F01_cb2533_c30/f1p0/3420-2F | HB-HD-ZIP    | TF |

---



---

|                             |           |    |
|-----------------------------|-----------|----|
| F01_cb2533_c52/f1p0/3172-2F | HB-HD-ZIP | TF |
| F01_cb2533_c53/f1p0/3490-1F | HB-HD-ZIP | TF |
| F01_cb2533_c57/f1p3/3153-0F | HB-HD-ZIP | TF |
| F01_cb2533_c6/f2p1/3490-1F  | HB-HD-ZIP | TF |
| F01_cb2533_c65/f1p2/2992-1F | HB-HD-ZIP | TF |
| F01_cb2572_c0/f2p1/3513-1F  | HB-HD-ZIP | TF |
| F01_cb2572_c6/f1p0/3742-0F  | HB-HD-ZIP | TF |
| F01_cb2599_c18/f1p0/3075-1F | HB-BELL   | TF |
| F01_cb2599_c19/f1p0/3461-0F | HB-BELL   | TF |
| F01_cb2599_c20/f1p0/1890-2F | HB-other  | TF |
| F01_cb2599_c23/f1p0/3316-2F | HB-BELL   | TF |
| F01_cb2599_c28/f1p0/2946-1F | HB-BELL   | TF |
| F01_cb2599_c4/f4p0/2721-1F  | HB-BELL   | TF |
| F01_cb2599_c5/f2p1/2802-2F  | HB-BELL   | TF |
| F01_cb2599_c7/f1p0/3524-0F  | HB-BELL   | TF |
| F01_cb260_c13/f1p2/3725-2F  | C2C2-GATA | TF |
| F01_cb260_c15/f1p0/4067-0F  | C2C2-GATA | TF |
| F01_cb260_c20/f1p0/4102-0F  | C2C2-GATA | TF |
| F01_cb260_c21/f1p3/3927-1F  | C2C2-GATA | TF |
| F01_cb260_c23/f1p0/4082-2F  | C2C2-GATA | TF |
| F01_cb260_c28/f8p1/3718-2F  | C2C2-GATA | TF |
| F01_cb260_c7/f1p1/3641-0F   | C2C2-GATA | TF |
| F01_cb260_c7/f1p1/3641-2F   | C2C2-GATA | TF |
| F01_cb260_c8/f1p0/3825-0F   | C2C2-GATA | TF |
| F01_cb260_c9/f1p1/3879-1F   | C2C2-GATA | TF |
| F01_cb2618_c4/f1p0/4255-1F  | C2H2      | TF |

---

---

|                             |                |    |
|-----------------------------|----------------|----|
| F01_cb2618_c5/flp1/1408-2F  | C2H2           | TF |
| F01_cb2618_c7/flp1/1379-2F  | C2H2           | TF |
| F01_cb2618_c8/f6p1/1387-2F  | C2H2           | TF |
| F01_cb2619_c3/flp1/2037-2F  | C2H2           | TF |
| F01_cb2619_c5/flp0/1091-0F  | C2H2           | TF |
| F01_cb2629_c0/f3p3/4660-1F  | C3H            | TF |
| F01_cb2629_c0/f3p3/4660-2F  | SWI/SNF-BAF60b | TR |
| F01_cb2629_c14/flp0/3350-0F | SWI/SNF-BAF60b | TR |
| F01_cb2629_c16/flp0/2938-0F | SWI/SNF-BAF60b | TR |
| F01_cb2629_c27/flp2/2884-1F | C3H            | TF |
| F01_cb2629_c3/flp0/3859-1F  | SWI/SNF-BAF60b | TR |
| F01_cb2638_c1/flp0/3310-2F  | SET            | TR |
| F01_cb2638_c2/flp0/3093-0F  | SET            | TR |
| F01_cb2638_c3/flp0/3063-0F  | SET            | TR |
| F01_cb2640_c10/flp0/3278-1F | Jumonji        | TR |
| F01_cb2640_c11/flp0/3319-1F | Jumonji        | TR |
| F01_cb2640_c12/flp0/3046-2F | Jumonji        | TR |
| F01_cb2640_c13/flp0/3176-1F | Jumonji        | TR |
| F01_cb2640_c14/flp1/3398-2F | Jumonji        | TR |
| F01_cb2640_c18/flp0/3205-0F | Jumonji        | TR |
| F01_cb2640_c18/flp0/3205-1F | Jumonji        | TR |
| F01_cb2640_c22/flp1/3609-2F | Jumonji        | TR |
| F01_cb2640_c23/flp0/2402-1F | Jumonji        | TR |
| F01_cb2640_c24/flp0/3186-0F | Jumonji        | TR |
| F01_cb2640_c25/flp0/3308-0F | Jumonji        | TR |
| F01_cb2640_c28/flp0/3675-1F | Jumonji        | TR |

---

---

|                             |         |    |
|-----------------------------|---------|----|
| F01_cb2640_c28/f1p0/3675-2F | Jumonji | TR |
| F01_cb2640_c29/f1p0/3441-2F | Jumonji | TR |
| F01_cb2640_c3/f2p1/3206-2F  | Jumonji | TR |
| F01_cb2640_c31/f3p0/3266-0F | Jumonji | TR |
| F01_cb2640_c6/f1p0/3857-0F  | Jumonji | TR |
| F01_cb2640_c6/f1p0/3857-1F  | Jumonji | TR |
| F01_cb2640_c8/f1p0/3279-0F  | Jumonji | TR |
| F01_cb2640_c9/f1p0/3551-2F  | Jumonji | TR |
| F01_cb2649_c2/f1p0/2059-1F  | GRAS    | TF |
| F01_cb2720_c0/f1p0/3827-0F  | PHD     | TR |
| F01_cb2720_c1/f1p0/3716-1F  | PHD     | TR |
| F01_cb2737_c1/f4p0/2862-1F  | TRAF    | TR |
| F01_cb2737_c12/f1p0/3972-1F | TRAF    | TR |
| F01_cb2737_c13/f1p0/3105-2F | TRAF    | TR |
| F01_cb2737_c14/f1p0/2854-2F | TRAF    | TR |
| F01_cb2737_c15/f1p0/3303-0F | TRAF    | TR |
| F01_cb2737_c19/f1p0/3583-2F | TRAF    | TR |
| F01_cb2737_c20/f1p0/3644-0F | TRAF    | TR |
| F01_cb2737_c21/f1p2/3479-1F | TRAF    | TR |
| F01_cb2737_c22/f1p0/3196-0F | TRAF    | TR |
| F01_cb2737_c22/f1p0/3196-1F | TRAF    | TR |
| F01_cb2737_c23/f1p0/2933-0F | TRAF    | TR |
| F01_cb2737_c27/f1p0/2325-1F | TRAF    | TR |
| F01_cb2737_c43/f1p0/3713-0F | TRAF    | TR |
| F01_cb2737_c43/f1p0/3713-2F | TRAF    | TR |
| F01_cb2737_c50/f1p0/3706-2F | TRAF    | TR |

---

---

|                             |              |    |
|-----------------------------|--------------|----|
| F01_cb2737_c54/flp0/3029-1F | TRAF         | TR |
| F01_cb2737_c63/flp2/2799-1F | TRAF         | TR |
| F01_cb2737_c64/flp1/2838-2F | TRAF         | TR |
| F01_cb2737_c9/f2p0/2910-2F  | TRAF         | TR |
| F01_cb2747_c16/flp1/3380-0F | SWI/SNF-SWI3 | TR |
| F01_cb2747_c16/flp1/3380-1F | MYB-related  | TF |
| F01_cb2760_c0/f3p0/3301-1F  | B3           | TF |
| F01_cb2760_c4/flp0/3330-0F  | B3           | TF |
| F01_cb2760_c9/flp0/3316-2F  | B3           | TF |
| F01_cb2792_c13/flp0/3807-2F | B3-ARF       | TF |
| F01_cb2792_c14/flp0/3588-0F | B3-ARF       | TF |
| F01_cb2792_c17/flp0/3095-0F | B3-ARF       | TF |
| F01_cb2792_c18/flp0/2374-1F | B3-ARF       | TF |
| F01_cb2792_c21/flp0/3291-0F | B3           | TF |
| F01_cb2792_c24/flp0/3416-0F | B3-ARF       | TF |
| F01_cb2792_c27/flp0/3552-1F | B3-ARF       | TF |
| F01_cb2792_c27/flp0/3552-2F | AUX/IAA      | TR |
| F01_cb2792_c28/flp0/3225-0F | B3-ARF       | TF |
| F01_cb2792_c29/flp1/3324-1F | B3-ARF       | TF |
| F01_cb2792_c5/flp0/3809-1F  | AUX/IAA      | TR |
| F01_cb2792_c5/flp0/3809-2F  | B3-ARF       | TF |
| F01_cb2792_c6/flp0/3198-0F  | B3-ARF       | TF |
| F01_cb2792_c7/flp0/2929-0F  | B3-ARF       | TF |
| F01_cb2792_c7/flp0/2929-2F  | AUX/IAA      | TR |
| F01_cb2792_c8/flp1/3110-0F  | AUX/IAA      | TR |
| F01_cb2792_c8/flp1/3110-1F  | B3-ARF       | TF |

---

---

|                             |           |    |
|-----------------------------|-----------|----|
| F01_cb2806_c6/flp0/6088-0F  | DDT       | TR |
| F01_cb280_c67/flp0/2419-2F  | NF-YA     | TF |
| F01_cb2812_c4/f2p0/3146-0F  | DDT       | TR |
| F01_cb2812_c6/flp0/3033-2F  | DDT       | TR |
| F01_cb2812_c8/f3p0/3209-0F  | DDT       | TR |
| F01_cb2899_c0/f4p0/1604-2F  | C2C2-GATA | TF |
| F01_cb2899_c1/f2p0/1740-2F  | C2C2-GATA | TF |
| F01_cb2899_c11/flp0/1619-0F | C2C2-GATA | TF |
| F01_cb2899_c12/flp0/1615-2F | C2C2-GATA | TF |
| F01_cb2899_c13/flp0/1590-0F | C2C2-GATA | TF |
| F01_cb2899_c13/flp0/1590-1F | Tify      | TF |
| F01_cb2899_c14/flp0/1484-0F | C2C2-GATA | TF |
| F01_cb2899_c15/flp0/1306-0F | C2C2-GATA | TF |
| F01_cb2899_c2/flp0/3774-1F  | C2C2-GATA | TF |
| F01_cb2899_c3/flp0/2878-0F  | C2C2-GATA | TF |
| F01_cb2899_c8/flp0/2712-2F  | C2C2-GATA | TF |
| F01_cb2899_c9/flp0/1705-0F  | C2C2-GATA | TF |
| F01_cb2903_c0/f8p1/2229-0F  | WRKY      | TF |
| F01_cb2903_c10/flp0/2263-2F | WRKY      | TF |
| F01_cb2903_c13/flp0/2228-0F | WRKY      | TF |
| F01_cb2903_c13/flp0/2228-1F | WRKY      | TF |
| F01_cb2903_c14/flp0/2117-0F | WRKY      | TF |
| F01_cb2903_c5/flp0/3769-1F  | WRKY      | TF |
| F01_cb2937_c0/flp0/3765-2F  | Others    | TR |
| F01_cb2937_c3/flp0/3537-2F  | Others    | TR |
| F01_cb2937_c4/flp0/3451-1F  | Others    | TR |

---

---

|                             |         |    |
|-----------------------------|---------|----|
| F01_cb2962_c12/f1p0/3385-2F | FAR1    | TF |
| F01_cb2962_c14/f1p0/3047-0F | FAR1    | TF |
| F01_cb2962_c17/f1p0/3231-2F | FAR1    | TF |
| F01_cb2962_c7/f1p0/3759-0F  | FAR1    | TF |
| F01_cb2963_c0/f1p0/3758-2F  | PHD     | TR |
| F01_cb2963_c1/f1p0/3071-2F  | PHD     | TR |
| F01_cb2963_c2/f1p1/3308-0F  | PHD     | TR |
| F01_cb2963_c3/f1p0/3590-1F  | PHD     | TR |
| F01_cb2966_c0/f3p0/2527-0F  | FAR1    | TF |
| F01_cb2966_c1/f2p0/2466-2F  | FAR1    | TF |
| F01_cb2966_c2/f1p0/3755-1F  | FAR1    | TF |
| F01_cb2966_c4/f1p0/2868-2F  | FAR1    | TF |
| F01_cb2966_c5/f1p0/2974-1F  | FAR1    | TF |
| F01_cb2966_c6/f1p0/5561-0F  | FAR1    | TF |
| F01_cb2966_c6/f1p0/5561-0R  | FAR1    | TF |
| F01_cb2966_c6/f1p0/5561-1F  | FAR1    | TF |
| F01_cb2977_c0/f1p0/3755-2F  | Jumonji | TR |
| F01_cb3008_c0/f11p3/2616-0F | FAR1    | TF |
| F01_cb3008_c1/f2p2/3740-2F  | FAR1    | TF |
| F01_cb3008_c2/f1p1/2485-0F  | FAR1    | TF |
| F01_cb3008_c5/f1p1/1912-0F  | FAR1    | TF |
| F01_cb3031_c0/f1p0/3742-2F  | Jumonji | TR |
| F01_cb3031_c1/f1p0/3822-2F  | Jumonji | TR |
| F01_cb3031_c2/f1p0/2783-0F  | Jumonji | TR |
| F01_cb3067_c1/f1p0/4064-1F  | SNF2    | TR |
| F01_cb3086_c10/f2p1/4066-1F | PHD     | TR |

---

---

|                             |         |    |
|-----------------------------|---------|----|
| F01_cb3086_c14/flp0/3734-1F | CAMTA   | TF |
| F01_cb3086_c17/flp0/3322-0F | CAMTA   | TF |
| F01_cb3086_c29/flp2/3439-0F | CAMTA   | TF |
| F01_cb3086_c3/f3p1/3388-2F  | CAMTA   | TF |
| F01_cb3086_c36/flp1/3238-1F | CAMTA   | TF |
| F01_cb3086_c4/f3p1/3409-0F  | CAMTA   | TF |
| F01_cb3086_c40/flp0/3247-0F | CAMTA   | TF |
| F01_cb3086_c44/flp0/3558-1F | CAMTA   | TF |
| F01_cb3086_c45/flp0/3498-2F | CAMTA   | TF |
| F01_cb3086_c53/flp1/3280-2F | CAMTA   | TF |
| F01_cb3086_c57/flp0/3323-2F | CAMTA   | TF |
| F01_cb3086_c62/flp0/6330-0F | CAMTA   | TF |
| F01_cb3121_c1/flp0/3714-0R  | AUX/IAA | TR |
| F01_cb3121_c1/flp0/3714-2R  | B3-ARF  | TF |
| F01_cb3121_c4/flp1/3640-1R  | B3-ARF  | TF |
| F01_cb3121_c5/flp0/3594-2R  | B3-ARF  | TF |
| F01_cb3149_c15/flp0/4008-0F | B3-ARF  | TF |
| F01_cb3149_c16/flp1/4212-0F | AUX/IAA | TR |
| F01_cb3149_c16/flp1/4212-2F | B3      | TF |
| F01_cb3149_c17/flp0/4493-0F | B3-ARF  | TF |
| F01_cb3149_c18/flp1/3326-1F | B3-ARF  | TF |
| F01_cb3149_c20/flp0/4424-0F | B3-ARF  | TF |
| F01_cb3149_c24/flp0/4095-1F | B3-ARF  | TF |
| F01_cb3149_c25/flp0/3152-2F | B3-ARF  | TF |
| F01_cb3149_c26/flp0/3554-1F | B3-ARF  | TF |
| F01_cb3149_c29/flp0/2871-0F | B3      | TF |

---

---

|                             |         |    |
|-----------------------------|---------|----|
| F01_cb3149_c31/flp0/3457-0F | B3      | TF |
| F01_cb3149_c35/flp0/3213-2F | B3-ARF  | TF |
| F01_cb3149_c40/flp0/3643-0F | B3-ARF  | TF |
| F01_cb3149_c42/flp0/3602-1F | B3-ARF  | TF |
| F01_cb3149_c44/flp0/3465-2F | B3      | TF |
| F01_cb3149_c47/flp0/3833-0F | B3      | TF |
| F01_cb3149_c54/flp0/3496-0F | B3-ARF  | TF |
| F01_cb3149_c56/flp0/3368-0F | B3-ARF  | TF |
| F01_cb3149_c57/flp0/2868-0F | FAR1    | TF |
| F01_cb3149_c58/flp0/3200-1F | B3-ARF  | TF |
| F01_cb3149_c58/flp0/3200-2F | AUX/IAA | TR |
| F01_cb3164_c0/f2p0/3680-0F  | SET     | TR |
| F01_cb3164_c1/flp0/3697-0F  | SET     | TR |
| F01_cb3203_c12/flp1/2066-1F | GRAS    | TF |
| F01_cb3203_c22/flp0/2976-0F | GRAS    | TF |
| F01_cb3203_c22/flp0/2976-1F | GRAS    | TF |
| F01_cb3203_c23/f4p1/2176-0F | GRAS    | TF |
| F01_cb3203_c5/f2p0/3221-1F  | GRAS    | TF |
| F01_cb3203_c6/flp0/3678-2F  | GRAS    | TF |
| F01_cb3203_c7/flp2/3226-2F  | GRAS    | TF |
| F01_cb3211_c1/flp0/3687-2F  | B3      | TF |
| F01_cb3211_c2/flp1/3277-2F  | B3      | TF |
| F01_cb3211_c3/flp1/3175-1F  | B3      | TF |
| F01_cb3211_c4/flp0/3640-1F  | B3      | TF |
| F01_cb3211_c6/flp0/3543-2F  | B3      | TF |
| F01_cb3214_c1/flp0/3686-2F  | CAMTA   | TF |

---



---

|                             |             |    |
|-----------------------------|-------------|----|
| F01_cb3214_c3/f1p0/3521-1F  | CAMTA       | TF |
| F01_cb3214_c5/f1p0/3377-1F  | CAMTA       | TF |
| F01_cb3214_c6/f3p1/3424-2F  | CAMTA       | TF |
| F01_cb3226_c0/f4p0/2730-0F  | WRKY        | TF |
| F01_cb3226_c0/f4p0/2730-1F  | WRKY        | TF |
| F01_cb3226_c10/f1p0/3292-1F | WRKY        | TF |
| F01_cb3226_c12/f1p0/3216-0F | WRKY        | TF |
| F01_cb3226_c16/f1p0/2457-1F | WRKY        | TF |
| F01_cb3226_c20/f1p1/2573-1F | WRKY        | TF |
| F01_cb3226_c22/f2p0/2434-0F | WRKY        | TF |
| F01_cb3226_c5/f2p0/2559-1F  | WRKY        | TF |
| F01_cb3226_c6/f1p0/3708-0F  | WRKY        | TF |
| F01_cb3226_c6/f1p0/3708-2F  | WRKY        | TF |
| F01_cb3226_c7/f1p0/3210-0F  | WRKY        | TF |
| F01_cb3226_c8/f1p0/2993-0F  | WRKY        | TF |
| F01_cb3226_c8/f1p0/2993-2F  | WRKY        | TF |
| F01_cb3226_c9/f1p0/2473-0F  | WRKY        | TF |
| F01_cb3227_c10/f2p0/3206-1F | LUG         | TR |
| F01_cb3227_c13/f1p0/3841-2F | LUG         | TR |
| F01_cb3227_c15/f1p1/3305-1F | LUG         | TR |
| F01_cb3227_c25/f1p0/3220-1F | LUG         | TR |
| F01_cb3227_c31/f1p0/3481-2F | LUG         | TR |
| F01_cb3227_c37/f1p0/3185-2F | LUG         | TR |
| F01_cb3227_c41/f9p1/3288-0F | LUG         | TR |
| F01_cb3227_c8/f2p1/3397-0F  | LUG         | TR |
| F01_cb3253_c0/f2p0/2494-2F  | MYB-related | TF |

---

---

|                             |             |    |
|-----------------------------|-------------|----|
| F01_cb3253_c1/flp0/3675-2F  | MYB-related | TF |
| F01_cb3253_c2/flp1/2645-2F  | MYB-related | TF |
| F01_cb3253_c3/flp0/2624-2F  | MYB-related | TF |
| F01_cb3269_c1/f2p1/3036-0F  | SNF2        | TR |
| F01_cb3269_c10/flp0/2536-0F | SNF2        | TR |
| F01_cb3269_c11/flp0/2163-2F | SNF2        | TR |
| F01_cb3269_c13/flp0/2224-0F | SNF2        | TR |
| F01_cb3269_c13/flp0/2224-2F | SNF2        | TR |
| F01_cb3269_c8/flp0/3501-0F  | SNF2        | TR |
| F01_cb3278_c12/flp0/3210-0F | FAR1        | TF |
| F01_cb3278_c16/flp0/3632-1F | FAR1        | TF |
| F01_cb3278_c18/flp0/3282-0F | FAR1        | TF |
| F01_cb3278_c18/flp0/3282-1F | FAR1        | TF |
| F01_cb3278_c2/f3p0/3188-1F  | FAR1        | TF |
| F01_cb3278_c3/flp0/3594-0F  | FAR1        | TF |
| F01_cb3278_c5/flp0/3664-1F  | FAR1        | TF |
| F01_cb3278_c5/flp0/3664-2F  | FAR1        | TF |
| F01_cb3278_c9/flp0/3082-0F  | FAR1        | TF |
| F01_cb3280_c1/flp0/2723-2F  | bZIP        | TF |
| F01_cb3280_c2/flp0/2122-0F  | bZIP        | TF |
| F01_cb3280_c3/flp0/1537-2F  | bZIP        | TF |
| F01_cb3306_c0/f4p0/3336-1F  | Trihelix    | TF |
| F01_cb3306_c11/flp0/3005-1F | Trihelix    | TF |
| F01_cb3306_c12/flp0/3175-2F | Trihelix    | TF |
| F01_cb3306_c13/flp0/2058-0F | Trihelix    | TF |
| F01_cb3306_c20/flp0/3929-0F | Trihelix    | TF |

---

---

|                              |          |    |
|------------------------------|----------|----|
| F01_cb3306_c4/flp0/4279-1F   | Trihelix | TF |
| F01_cb3306_c5/flp0/3913-1F   | Trihelix | TF |
| F01_cb3306_c9/flp0/3416-1F   | Trihelix | TF |
| F01_cb3312_c0/f9p2/1172-2F   | bZIP     | TF |
| F01_cb3312_c12/flp0/3200-2F  | bZIP     | TF |
| F01_cb3312_c14/flp1/3482-0F  | bZIP     | TF |
| F01_cb3312_c16/flp0/1452-1F  | bZIP     | TF |
| F01_cb3312_c17/flp0/1262-2F  | bZIP     | TF |
| F01_cb3312_c19/flp0/1144-0F  | bZIP     | TF |
| F01_cb3312_c22/f3p2/1210-2F  | bZIP     | TF |
| F01_cb3312_c3/f3p0/2369-0F   | bZIP     | TF |
| F01_cb3312_c6/f2p0/3040-1F   | bZIP     | TF |
| F01_cb3318_c0/flp0/3663-0F   | PHD      | TR |
| F01_cb3318_c1/flp0/3625-2F   | PHD      | TR |
| F01_cb3318_c2/flp0/3688-0F   | PHD      | TR |
| F01_cb3318_c3/flp0/3536-1F   | PHD      | TR |
| F01_cb3318_c4/flp1/3064-0F   | PHD      | TR |
| F01_cb3318_c6/flp0/2556-2F   | PHD      | TR |
| F01_cb3318_c7/flp0/3560-2F   | PHD      | TR |
| F01_cb3339_c12/fl3p1/3205-2F | RWP-RK   | TF |
| F01_cb3339_c2/flp1/3653-2F   | RWP-RK   | TF |
| F01_cb3339_c5/flp1/3094-2F   | RWP-RK   | TF |
| F01_cb3339_c8/flp0/3249-2F   | RWP-RK   | TF |
| F01_cb3339_c9/flp0/2219-2F   | RWP-RK   | TF |
| F01_cb3344_c11/flp0/3514-0F  | Jumonji  | TR |
| F01_cb3344_c12/flp0/2543-1F  | Jumonji  | TR |

---

---

|                             |              |    |
|-----------------------------|--------------|----|
| F01_cb3344_c13/flp0/2922-0F | Jumonji      | TR |
| F01_cb3344_c14/flp0/3327-2F | Jumonji      | TR |
| F01_cb3344_c2/f4p1/3653-0F  | Jumonji      | TR |
| F01_cb3344_c4/f2p0/2908-0F  | Jumonji      | TR |
| F01_cb3344_c9/flp0/3064-1F  | Jumonji      | TR |
| F01_cb3355_c13/flp1/2541-2F | C2H2         | TF |
| F01_cb3355_c15/flp3/2337-2F | C2H2         | TF |
| F01_cb3367_c13/flp0/1942-0F | GRAS         | TF |
| F01_cb3367_c13/flp0/1942-1F | GRAS         | TF |
| F01_cb3367_c15/flp0/3106-1F | GRAS         | TF |
| F01_cb3367_c20/f3p0/3095-1F | GRAS         | TF |
| F01_cb3367_c21/flp0/3212-1F | GRAS         | TF |
| F01_cb3367_c21/flp0/3212-2F | GRAS         | TF |
| F01_cb3367_c9/flp0/3072-2F  | GRAS         | TF |
| F01_cb3383_c0/f2p0/3072-1F  | SWI/SNF-SWI3 | TR |
| F01_cb3383_c2/flp0/3641-0F  | SWI/SNF-SWI3 | TR |
| F01_cb3383_c3/flp0/3067-0F  | SWI/SNF-SWI3 | TR |
| F01_cb3390_c0/f2p0/3636-0F  | mTERF        | TR |
| F01_cb3390_c0/f2p0/3636-2F  | mTERF        | TR |
| F01_cb3390_c1/f2p0/1899-0F  | mTERF        | TR |
| F01_cb3390_c10/flp0/2708-1F | mTERF        | TR |
| F01_cb3390_c11/flp0/2011-0F | mTERF        | TR |
| F01_cb3390_c13/flp0/2133-0F | mTERF        | TR |
| F01_cb3390_c13/flp0/2133-2F | mTERF        | TR |
| F01_cb3390_c14/flp0/1861-0F | mTERF        | TR |
| F01_cb3390_c14/flp0/1861-2F | mTERF        | TR |

---

---

|                             |          |    |
|-----------------------------|----------|----|
| F01_cb3390_c16/flp0/1774-2F | mTERF    | TR |
| F01_cb3390_c2/flp0/1813-0F  | mTERF    | TR |
| F01_cb3390_c2/flp0/1813-1F  | mTERF    | TR |
| F01_cb3390_c3/f2p0/2186-2F  | mTERF    | TR |
| F01_cb3390_c6/flp0/2069-0F  | mTERF    | TR |
| F01_cb3390_c6/flp0/2069-2F  | mTERF    | TR |
| F01_cb3390_c7/flp0/2203-0F  | mTERF    | TR |
| F01_cb3390_c8/flp0/2138-0F  | mTERF    | TR |
| F01_cb3390_c8/flp0/2138-2F  | mTERF    | TR |
| F01_cb3390_c9/flp0/2379-0F  | mTERF    | TR |
| F01_cb3390_c9/flp0/2379-1F  | mTERF    | TR |
| F01_cb3411_c17/flp0/3564-0F | C3H      | TF |
| F01_cb3431_c0/f3p2/1268-0F  | C2C2-LSD | TF |
| F01_cb3431_c2/flp0/2266-1F  | C2C2-LSD | TF |
| F01_cb3431_c2/flp0/2266-2F  | C2C2-LSD | TF |
| F01_cb3431_c4/flp0/2338-1F  | C2C2-LSD | TF |
| F01_cb3431_c5/flp0/2189-0F  | C2C2-LSD | TF |
| F01_cb3449_c10/flp0/4190-1R | GRAS     | TF |
| F01_cb3451_c0/flp0/2080-1F  | mTERF    | TR |
| F01_cb3451_c0/flp0/2080-2F  | mTERF    | TR |
| F01_cb3451_c1/f2p0/3277-2F  | mTERF    | TR |
| F01_cb3451_c2/flp0/2070-1F  | mTERF    | TR |
| F01_cb3451_c3/flp0/2428-0F  | mTERF    | TR |
| F01_cb3451_c3/flp0/2428-1F  | mTERF    | TR |
| F01_cb3451_c4/flp1/2393-0F  | mTERF    | TR |
| F01_cb3451_c4/flp1/2393-2F  | mTERF    | TR |

---

---

|                             |              |    |
|-----------------------------|--------------|----|
| F01_cb3451_c6/flp1/2200-1F  | mTERF        | TR |
| F01_cb3451_c7/f2p0/2047-2F  | mTERF        | TR |
| F01_cb3451_c8/flp0/1800-0F  | mTERF        | TR |
| F01_cb3457_c0/f2p0/2030-1F  | bZIP         | TF |
| F01_cb3457_c10/flp0/2348-1F | bZIP         | TF |
| F01_cb3457_c11/flp0/1940-1F | bZIP         | TF |
| F01_cb3457_c12/flp0/2646-0F | bZIP         | TF |
| F01_cb3457_c13/flp0/2100-2F | bZIP         | TF |
| F01_cb3457_c14/flp0/2004-2F | bZIP         | TF |
| F01_cb3457_c2/flp0/2243-2F  | bZIP         | TF |
| F01_cb3457_c3/flp0/2251-2F  | bZIP         | TF |
| F01_cb3457_c8/flp0/2552-1F  | bZIP         | TF |
| F01_cb3471_c0/flp0/3611-2F  | bHLH         | TF |
| F01_cb3471_c1/flp0/3483-0F  | bHLH         | TF |
| F01_cb3471_c3/flp1/1814-0F  | bHLH         | TF |
| F01_cb3471_c4/flp0/1799-2F  | bHLH         | TF |
| F01_cb3471_c5/flp1/1643-0F  | bHLH         | TF |
| F01_cb3520_c5/flp0/3051-1F  | TRAF         | TR |
| F01_cb353_c3/flp0/4866-1F   | Others       | TR |
| F01_cb353_c3/flp0/4866-2F   | Others       | TR |
| F01_cb353_c4/flp1/3068-0F   | Others       | TR |
| F01_cb353_c5/flp1/2645-2F   | C2C2-CO-like | TF |
| F01_cb353_c6/flp0/1879-1F   | Others       | TR |
| F01_cb353_c8/f2p2/1647-0F   | C2C2-CO-like | TF |
| F01_cb3549_c0/f3p0/1735-0F  | HB-KNOX      | TF |
| F01_cb3549_c1/f3p1/1745-2F  | HB-KNOX      | TF |

---

---

|                             |             |    |
|-----------------------------|-------------|----|
| F01_cb3549_c2/f2p0/1762-1F  | HB-KNOX     | TF |
| F01_cb3549_c20/flp0/851-2F  | HB-other    | TF |
| F01_cb3549_c21/flp0/5108-1F | HB-other    | TF |
| F01_cb3549_c3/flp0/3595-1F  | HB-KNOX     | TF |
| F01_cb3549_c6/flp2/1934-0F  | HB-KNOX     | TF |
| F01_cb3549_c8/flp0/3448-0F  | HB-other    | TF |
| F01_cb3551_c0/f4p0/3532-2F  | FAR1        | TF |
| F01_cb3551_c10/flp0/3333-0F | FAR1        | TF |
| F01_cb3551_c11/flp0/3439-2F | FAR1        | TF |
| F01_cb3551_c13/flp0/3934-0F | FAR1        | TF |
| F01_cb3551_c14/flp1/3279-0F | FAR1        | TF |
| F01_cb3551_c15/flp0/3307-1F | FAR1        | TF |
| F01_cb3551_c17/flp1/3045-0F | FAR1        | TF |
| F01_cb3551_c19/flp0/3455-1F | FAR1        | TF |
| F01_cb3551_c2/f2p2/3461-2F  | FAR1        | TF |
| F01_cb3551_c3/f2p0/3540-2F  | FAR1        | TF |
| F01_cb3551_c5/flp2/3595-0F  | FAR1        | TF |
| F01_cb3551_c9/flp0/3631-0F  | FAR1        | TF |
| F01_cb3566_c0/f2p1/1967-0F  | C2H2        | TF |
| F01_cb3566_c1/flp1/3588-0F  | C2H2        | TF |
| F01_cb3583_c1/flp0/3595-2F  | Jumonji     | TR |
| F01_cb3583_c4/flp0/3408-0F  | Jumonji     | TR |
| F01_cb3586_c0/f4p0/3057-0F  | MYB-related | TF |
| F01_cb3586_c10/flp0/2722-0F | MYB-related | TF |
| F01_cb3586_c11/flp0/2822-1F | MYB-related | TF |
| F01_cb3586_c13/flp0/3140-1F | MYB-related | TF |

---

---

|                             |             |    |
|-----------------------------|-------------|----|
| F01_cb3586_c2/flp0/3545-2F  | MYB-related | TF |
| F01_cb3586_c5/flp0/2816-0F  | MYB-related | TF |
| F01_cb3586_c6/flp0/2809-1F  | MYB-related | TF |
| F01_cb3586_c7/flp0/2846-2F  | MYB-related | TF |
| F01_cb3586_c9/flp0/3463-2F  | MYB-related | TF |
| F01_cb3597_c11/flp0/3188-1F | FAR1        | TF |
| F01_cb3597_c13/flp0/3124-2F | FAR1        | TF |
| F01_cb3597_c30/f5p0/3147-0F | FAR1        | TF |
| F01_cb3597_c30/f5p0/3147-2F | FAR1        | TF |
| F01_cb3597_c5/flp0/3587-2F  | FAR1        | TF |
| F01_cb3597_c6/flp1/3143-0F  | FAR1        | TF |
| F01_cb3597_c9/flp1/3159-0F  | FAR1        | TF |
| F01_cb3603_c26/flp1/4747-2F | SET         | TR |
| F01_cb3603_c30/flp0/3545-1F | SET         | TR |
| F01_cb3603_c31/flp0/4927-0F | SET         | TR |
| F01_cb3603_c36/flp0/5599-2F | SET         | TR |
| F01_cb3603_c38/flp0/4973-2F | SET         | TR |
| F01_cb3603_c4/f2p3/5068-1F  | SET         | TR |
| F01_cb3603_c40/flp1/5143-0F | SET         | TR |
| F01_cb3603_c40/flp1/5143-1F | SET         | TR |
| F01_cb3603_c41/flp0/5154-1F | SET         | TR |
| F01_cb3603_c42/flp0/5113-1F | SET         | TR |
| F01_cb3603_c43/flp2/5123-1F | SET         | TR |
| F01_cb3603_c46/flp0/5012-0F | SET         | TR |
| F01_cb3628_c2/flp0/3299-2F  | HB-HD-ZIP   | TF |
| F01_cb3628_c3/flp0/3849-2F  | HB-HD-ZIP   | TF |

---



---

|                             |           |    |
|-----------------------------|-----------|----|
| F01_cb3628_c7/flp0/3843-1F  | HB-HD-ZIP | TF |
| F01_cb3628_c8/flp0/3355-2F  | HB-other  | TF |
| F01_cb3644_c15/flp0/3548-0F | B3        | TF |
| F01_cb3644_c18/flp1/3159-1F | B3        | TF |
| F01_cb3644_c20/flp0/3151-0F | B3        | TF |
| F01_cb3644_c22/flp0/3675-1F | B3        | TF |
| F01_cb3644_c5/f3p0/3297-1F  | B3        | TF |
| F01_cb3644_c6/flp0/3570-0F  | B3        | TF |
| F01_cb3644_c7/flp0/3638-0F  | B3        | TF |
| F01_cb3644_c9/flp0/3316-1F  | B3        | TF |
| F01_cb3650_c11/flp1/1811-0F | B3        | TF |
| F01_cb3650_c11/flp1/1811-1F | B3        | TF |
| F01_cb3650_c14/flp1/1651-0F | B3        | TF |
| F01_cb3650_c14/flp1/1651-1F | B3        | TF |
| F01_cb3650_c18/f7p1/1695-0F | B3        | TF |
| F01_cb3650_c5/flp1/2879-0F  | B3        | TF |
| F01_cb3650_c6/flp1/2430-1F  | B3        | TF |
| F01_cb3650_c6/flp1/2430-2F  | B3        | TF |
| F01_cb3650_c7/flp0/2118-0F  | B3        | TF |
| F01_cb3650_c7/flp0/2118-2F  | B3        | TF |
| F01_cb3650_c8/flp2/2335-1F  | B3        | TF |
| F01_cb3699_c10/flp0/3357-2F | HSF       | TF |
| F01_cb3699_c11/flp0/2983-1F | HSF       | TF |
| F01_cb3699_c12/flp0/3310-0F | HSF       | TF |
| F01_cb3699_c17/flp0/3321-1F | HSF       | TF |
| F01_cb3699_c2/flp0/3554-2F  | HSF       | TF |

---

---

|                             |      |    |
|-----------------------------|------|----|
| F01_cb3699_c6/f1p0/3729-1F  | HSF  | TF |
| F01_cb369_c1/f2p0/2357-0F   | SNF2 | TR |
| F01_cb369_c4/f1p0/4486-0F   | SNF2 | TR |
| F01_cb369_c4/f1p0/4486-2F   | SNF2 | TR |
| F01_cb369_c5/f1p0/4455-0F   | SNF2 | TR |
| F01_cb369_c6/f1p0/4410-2F   | SNF2 | TR |
| F01_cb369_c8/f1p0/3502-0F   | SNF2 | TR |
| F01_cb369_c8/f1p0/3502-1F   | SNF2 | TR |
| F01_cb3750_c16/f1p0/3161-1F | VOZ  | TF |
| F01_cb3750_c17/f1p0/2207-0F | VOZ  | TF |
| F01_cb3750_c20/f1p3/3049-1F | VOZ  | TF |
| F01_cb3750_c3/f4p2/2344-2F  | VOZ  | TF |
| F01_cb3750_c30/f1p0/2586-2F | VOZ  | TF |
| F01_cb3750_c31/f1p0/2307-0F | VOZ  | TF |
| F01_cb3750_c35/f1p1/2165-2F | VOZ  | TF |
| F01_cb3750_c5/f2p2/2925-0F  | VOZ  | TF |
| F01_cb3750_c5/f2p2/2925-1F  | VOZ  | TF |
| F01_cb3750_c6/f2p0/2746-1F  | VOZ  | TF |
| F01_cb3750_c9/f1p0/2220-0F  | VOZ  | TF |
| F01_cb3755_c10/f2p1/3165-1F | SET  | TR |
| F01_cb3755_c14/f1p1/3790-0F | SET  | TR |
| F01_cb3755_c19/f1p0/3624-0F | SET  | TR |
| F01_cb3755_c30/f1p1/3108-0F | SET  | TR |
| F01_cb3755_c31/f1p0/3146-2F | SET  | TR |
| F01_cb3755_c35/f1p1/2918-0F | SET  | TR |
| F01_cb3755_c41/f1p0/2802-0F | SET  | TR |

---

---

|                              |          |    |
|------------------------------|----------|----|
| F01_cb3755_c45/f1p0/2895-2F  | SET      | TR |
| F01_cb3755_c47/f1p0/3281-2F  | SET      | TR |
| F01_cb3755_c50/f1p1/2934-2F  | SET      | TR |
| F01_cb3755_c51/f1p1/3015-0F  | SET      | TR |
| F01_cb3755_c52/f1p0/2922-1F  | SET      | TR |
| F01_cb3755_c57/f1p0/3053-1F  | SET      | TR |
| F01_cb3755_c6/f8p1/3083-2F   | SET      | TR |
| F01_cb3755_c60/f11p1/2825-2F | SET      | TR |
| F01_cb3755_c62/f9p1/2884-2F  | SET      | TR |
| F01_cb3755_c63/f9p2/2822-1F  | SET      | TR |
| F01_cb3755_c8/f4p0/2721-1F   | SET      | TR |
| F01_cb3764_c0/f3p0/3263-1F   | HB-other | TF |
| F01_cb3764_c1/f1p0/2578-1F   | HB-BELL  | TF |
| F01_cb3791_c1/f3p0/1750-2F   | HRT      | TF |
| F01_cb3791_c12/f1p0/1510-1F  | HRT      | TF |
| F01_cb3791_c17/f4p2/1499-0F  | HRT      | TF |
| F01_cb3791_c2/f1p0/3527-1F   | HRT      | TF |
| F01_cb3791_c3/f1p0/2226-1F   | HRT      | TF |
| F01_cb3791_c4/f1p0/2359-2F   | HRT      | TF |
| F01_cb3791_c8/f1p0/1798-0F   | HRT      | TF |
| F01_cb3799_c0/f1p0/3527-0F   | HB-other | TF |
| F01_cb3799_c1/f1p0/2994-0F   | HB-other | TF |
| F01_cb3839_c10/f1p0/3225-1F  | B3-ARF   | TF |
| F01_cb3839_c12/f2p0/3178-2F  | B3-ARF   | TF |
| F01_cb3839_c16/f1p0/2928-1F  | B3-ARF   | TF |
| F01_cb3839_c16/f1p0/2928-2F  | AUX/IAA  | TR |

---

---

|                             |        |    |
|-----------------------------|--------|----|
| F01_cb3839_c19/flp0/2723-1F | B3-ARF | TF |
| F01_cb3839_c22/f7p1/3028-2F | B3-ARF | TF |
| F01_cb3839_c8/flp0/2927-1F  | B3     | TF |
| F01_cb3842_c0/f2p0/2475-1F  | mTERF  | TR |
| F01_cb3842_c1/flp0/3511-1F  | mTERF  | TR |
| F01_cb3842_c4/flp0/3346-1F  | mTERF  | TR |
| F01_cb3842_c5/flp0/2814-0F  | mTERF  | TR |
| F01_cb3842_c6/flp0/3329-0F  | mTERF  | TR |
| F01_cb3842_c6/flp0/3329-1F  | mTERF  | TR |
| F01_cb3842_c6/flp0/3329-2F  | mTERF  | TR |
| F01_cb3886_c1/f3p1/2318-2F  | B3     | TF |
| F01_cb3886_c12/flp1/1735-1F | B3     | TF |
| F01_cb3886_c3/flp2/2629-1F  | B3     | TF |
| F01_cb3886_c4/flp1/2982-2F  | B3     | TF |
| F01_cb3886_c9/flp2/2477-1F  | B3     | TF |
| F01_cb392_c2/flp0/3348-0F   | SET    | TR |
| F01_cb392_c4/flp1/1991-1F   | SET    | TR |
| F01_cb392_c5/flp0/1982-0F   | SET    | TR |
| F01_cb392_c6/flp0/1997-2F   | SET    | TR |
| F01_cb392_c7/flp0/2120-2F   | SET    | TR |
| F01_cb392_c9/flp0/2892-1F   | SET    | TR |
| F01_cb3941_c35/flp0/3281-0F | FAR1   | TF |
| F01_cb3941_c35/flp0/3281-2F | FAR1   | TF |
| F01_cb3941_c36/flp0/3156-0F | FAR1   | TF |
| F01_cb3941_c36/flp0/3156-1F | FAR1   | TF |
| F01_cb3941_c48/flp0/3414-0F | FAR1   | TF |

---

---

|                             |           |    |
|-----------------------------|-----------|----|
| F01_cb3941_c48/flp0/3414-2F | FAR1      | TF |
| F01_cb3941_c94/flp0/2327-1F | FAR1      | TF |
| F01_cb3941_c94/flp0/2327-2F | FAR1      | TF |
| F01_cb3956_c10/flp0/2749-0F | DDT       | TR |
| F01_cb3956_c11/flp0/2270-2F | DDT       | TR |
| F01_cb3956_c2/flp0/3482-0F  | DDT       | TR |
| F01_cb3956_c5/flp0/2970-0F  | DDT       | TR |
| F01_cb3956_c8/flp0/2721-2F  | DDT       | TR |
| F01_cb3956_c9/flp0/2666-1F  | DDT       | TR |
| F01_cb3962_c2/flp0/2633-0F  | FAR1      | TF |
| F01_cb3965_c1/flp0/3487-1F  | TRAF      | TR |
| F01_cb3965_c3/flp0/2377-0F  | TRAF      | TR |
| F01_cb3965_c5/flp1/3316-1F  | TRAF      | TR |
| F01_cb3995_c6/flp0/3190-1F  | Others    | TR |
| F01_cb3995_c8/flp0/1625-0F  | Others    | TR |
| F01_cb4009_c0/flp0/3464-2F  | FAR1      | TF |
| F01_cb4009_c2/flp0/2929-0F  | FAR1      | TF |
| F01_cb4009_c3/flp0/3411-2F  | FAR1      | TF |
| F01_cb4013_c0/flp0/3469-0F  | PHD       | TR |
| F01_cb4013_c2/flp0/5086-1F  | PHD       | TR |
| F01_cb4013_c2/flp0/5086-2F  | DDT       | TR |
| F01_cb401_c79/flp0/2391-0F  | TRAF      | TR |
| F01_cb4025_c2/flp0/3461-0F  | GRAS      | TF |
| F01_cb4025_c5/f2p0/3060-2F  | GRAS      | TF |
| F01_cb4025_c6/flp0/3220-1F  | GRAS      | TF |
| F01_cb402_c36/flp0/5510-1R  | MADS-MIKC | TF |

---

---

|                             |        |    |
|-----------------------------|--------|----|
| F01_cb4042_c11/flp0/3362-1F | FAR1   | TF |
| F01_cb4042_c12/flp0/3156-1F | FAR1   | TF |
| F01_cb4042_c14/flp0/3138-0F | FAR1   | TF |
| F01_cb4042_c14/flp0/3138-1F | FAR1   | TF |
| F01_cb4042_c3/flp0/3470-2F  | FAR1   | TF |
| F01_cb4042_c5/flp1/3481-1F  | FAR1   | TF |
| F01_cb4042_c8/flp0/3354-2F  | FAR1   | TF |
| F01_cb4042_c9/flp0/3437-0F  | FAR1   | TF |
| F01_cb4074_c11/flp0/2602-1F | C2H2   | TF |
| F01_cb4074_c13/flp0/2925-1F | C2H2   | TF |
| F01_cb4074_c19/f3p1/2467-1F | C2H2   | TF |
| F01_cb4074_c3/f2p1/2503-0F  | C2H2   | TF |
| F01_cb4074_c4/f2p0/2329-0F  | C2H2   | TF |
| F01_cb4074_c6/flp0/3445-0F  | C2H2   | TF |
| F01_cb4074_c7/flp1/2826-0F  | C2H2   | TF |
| F01_cb4074_c7/flp1/2826-2F  | C2H2   | TF |
| F01_cb4074_c9/flp1/2413-0F  | C2H2   | TF |
| F01_cb4088_c2/flp0/2761-2F  | FAR1   | TF |
| F01_cb4088_c4/flp0/2792-0F  | FAR1   | TF |
| F01_cb4098_c63/flp0/2704-0F | SBP    | TF |
| F01_cb4101_c10/flp0/3199-0F | RWP-RK | TF |
| F01_cb4101_c11/f3p1/3262-1F | RWP-RK | TF |
| F01_cb4101_c12/flp1/3212-0F | RWP-RK | TF |
| F01_cb4101_c12/flp1/3212-2F | RWP-RK | TF |
| F01_cb4101_c2/flp0/3435-0F  | RWP-RK | TF |
| F01_cb4101_c6/flp0/3298-1F  | RWP-RK | TF |

---

---

|                             |             |    |
|-----------------------------|-------------|----|
| F01_cb4101_c8/flp0/3287-0F  | RWP-RK      | TF |
| F01_cb4131_c12/flp1/1212-2F | MYB-related | TF |
| F01_cb4131_c15/f7p3/1294-0F | MYB-related | TF |
| F01_cb4131_c5/fl5p2/1269-0F | MYB-related | TF |
| F01_cb4131_c6/flp0/3311-1F  | MYB-related | TF |
| F01_cb4131_c8/flp0/3080-1F  | MYB-related | TF |
| F01_cb4131_c9/flp0/2847-0F  | MYB-related | TF |
| F01_cb4147_c12/flp0/6657-1F | TAZ         | TR |
| F01_cb4147_c12/flp0/6657-2F | TAZ         | TR |
| F01_cb4147_c14/flp0/3211-0F | TAZ         | TR |
| F01_cb4147_c2/f2p1/6129-1F  | TAZ         | TR |
| F01_cb4147_c28/flp0/6755-0F | TAZ         | TR |
| F01_cb4147_c31/flp0/6049-1F | TAZ         | TR |
| F01_cb4147_c32/flp1/5785-1F | TAZ         | TR |
| F01_cb4147_c32/flp1/5785-2F | TAZ         | TR |
| F01_cb4147_c33/flp0/5961-0F | TAZ         | TR |
| F01_cb4147_c33/flp0/5961-1F | PHD         | TR |
| F01_cb4147_c33/flp0/5961-2F | TAZ         | TR |
| F01_cb4147_c38/flp2/5596-0F | TAZ         | TR |
| F01_cb4147_c38/flp2/5596-1F | PHD         | TR |
| F01_cb4147_c38/flp2/5596-2F | TAZ         | TR |
| F01_cb4147_c40/flp0/5399-2F | TAZ         | TR |
| F01_cb4147_c42/f4p4/5844-0F | TAZ         | TR |
| F01_cb4147_c5/flp0/2445-1F  | TAZ         | TR |
| F01_cb4147_c8/flp0/3276-2F  | TAZ         | TR |
| F01_cb4186_c1/f2p0/1783-0F  | Trihelix    | TF |

---

---

|                             |          |    |
|-----------------------------|----------|----|
| F01_cb4186_c10/f2p0/1882-1F | Trihelix | TF |
| F01_cb4186_c2/f2p1/1773-2F  | Trihelix | TF |
| F01_cb4186_c3/f1p0/3432-1F  | Trihelix | TF |
| F01_cb4186_c6/f1p1/1800-1F  | Trihelix | TF |
| F01_cb4186_c9/f3p1/1894-2F  | Trihelix | TF |
| F01_cb418_c19/f1p0/2326-1F  | bZIP     | TF |
| F01_cb418_c2/f2p2/2674-2F   | bZIP     | TF |
| F01_cb418_c5/f1p1/2711-2F   | bZIP     | TF |
| F01_cb418_c8/f1p1/2632-2F   | bZIP     | TF |
| F01_cb418_c9/f1p0/2782-0F   | bZIP     | TF |
| F01_cb4209_c12/f1p0/2915-1F | C3H      | TF |
| F01_cb4209_c5/f1p0/3403-0F  | C3H      | TF |
| F01_cb4209_c6/f1p0/3222-0F  | C3H      | TF |
| F01_cb4209_c6/f1p0/3222-2F  | C3H      | TF |
| F01_cb4209_c8/f1p0/3250-0F  | C3H      | TF |
| F01_cb4234_c15/f1p2/3200-0F | C3H      | TF |
| F01_cb4234_c18/f1p0/2918-1F | C3H      | TF |
| F01_cb4234_c19/f1p0/3319-1F | C3H      | TF |
| F01_cb4234_c5/f3p2/3150-1F  | C3H      | TF |
| F01_cb4235_c11/f1p2/3350-1F | SNF2     | TR |
| F01_cb4235_c12/f1p0/3273-2F | SNF2     | TR |
| F01_cb4235_c4/f1p2/3482-0F  | SNF2     | TR |
| F01_cb4235_c5/f1p2/3333-0F  | SNF2     | TR |
| F01_cb4235_c6/f1p0/2639-2F  | SNF2     | TR |
| F01_cb423_c1/f1p0/4817-1F   | E2F-DP   | TF |
| F01_cb4247_c4/f1p0/3145-1F  | FAR1     | TF |

---



---

|                             |       |    |
|-----------------------------|-------|----|
| F01_cb4247_c7/flp1/3200-2F  | FAR1  | TF |
| F01_cb4262_c1/flp0/2252-1F  | mTERF | TR |
| F01_cb4262_c1/flp0/2252-2F  | mTERF | TR |
| F01_cb4262_c2/flp0/2277-2F  | mTERF | TR |
| F01_cb4262_c3/flp0/1156-2F  | mTERF | TR |
| F01_cb4283_c4/flp0/3896-2F  | FAR1  | TF |
| F01_cb4283_c5/flp1/3520-1F  | FAR1  | TF |
| F01_cb4283_c8/flp0/3419-0F  | FAR1  | TF |
| F01_cb4314_c2/f3p0/2111-0F  | C3H   | TF |
| F01_cb4314_c4/flp0/3432-0F  | C3H   | TF |
| F01_cb4314_c5/flp0/3121-0F  | C3H   | TF |
| F01_cb4314_c6/flp0/2072-0F  | C3H   | TF |
| F01_cb4314_c7/flp0/2208-0F  | C3H   | TF |
| F01_cb4317_c0/f5p1/3336-0F  | SNF2  | TR |
| F01_cb4317_c11/flp1/3350-2F | SNF2  | TR |
| F01_cb4317_c13/flp0/3009-1F | SNF2  | TR |
| F01_cb4317_c14/flp0/2386-0F | SNF2  | TR |
| F01_cb4317_c14/flp0/2386-1F | SNF2  | TR |
| F01_cb4317_c15/flp0/3096-1F | SNF2  | TR |
| F01_cb4317_c5/flp0/4037-0F  | SNF2  | TR |
| F01_cb4317_c6/flp0/3297-0F  | SNF2  | TR |
| F01_cb4327_c1/f2p0/2125-0F  | IWS1  | TR |
| F01_cb4327_c10/flp0/1776-1F | IWS1  | TR |
| F01_cb4327_c11/flp0/1700-0F | IWS1  | TR |
| F01_cb4327_c12/flp0/1448-1F | IWS1  | TR |
| F01_cb4327_c4/flp0/2236-0F  | IWS1  | TR |

---

---

|                             |          |    |
|-----------------------------|----------|----|
| F01_cb4327_c6/flp0/2076-0F  | IWS1     | TR |
| F01_cb4327_c9/flp0/1848-0F  | IWS1     | TR |
| F01_cb432_c10/flp1/5326-2F  | C3H      | TF |
| F01_cb432_c8/flp0/5484-2F   | C3H      | TF |
| F01_cb432_c9/flp1/5358-2F   | C3H      | TF |
| F01_cb4337_c30/flp0/2725-0F | C3H      | TF |
| F01_cb4375_c0/f5p0/1767-2F  | mTERF    | TR |
| F01_cb4375_c1/f2p1/3160-0F  | mTERF    | TR |
| F01_cb4375_c6/flp0/2971-0F  | mTERF    | TR |
| F01_cb4375_c7/flp0/3057-2F  | mTERF    | TR |
| F01_cb4387_c0/f2p0/6053-1F  | HB-other | TF |
| F01_cb4388_c3/flp0/3270-2F  | FAR1     | TF |
| F01_cb4389_c11/flp1/2597-2F | TCP      | TF |
| F01_cb4389_c12/flp0/2103-2F | TCP      | TF |
| F01_cb4389_c15/flp1/2762-2F | TCP      | TF |
| F01_cb4389_c17/flp0/2434-2F | TCP      | TF |
| F01_cb4389_c22/flp0/2826-1F | TCP      | TF |
| F01_cb4389_c8/flp0/3361-2F  | TCP      | TF |
| F01_cb4389_c9/flp1/2744-1F  | TCP      | TF |
| F01_cb4427_c0/flp0/3349-1F  | SBP      | TF |
| F01_cb4427_c0/flp0/3349-2F  | SBP      | TF |
| F01_cb4427_c1/flp0/3309-2F  | SBP      | TF |
| F01_cb4427_c3/flp0/2034-2F  | SBP      | TF |
| F01_cb4444_c17/flp0/3051-1F | GRAS     | TF |
| F01_cb4444_c2/f4p0/2597-2F  | GRAS     | TF |
| F01_cb4444_c25/flp0/4660-1F | GRAS     | TF |

---

---

|                             |       |    |
|-----------------------------|-------|----|
| F01_cb4444_c26/flp0/2544-1F | GRAS  | TF |
| F01_cb4444_c30/flp0/2548-1F | GRAS  | TF |
| F01_cb4444_c31/flp0/2518-0F | GRAS  | TF |
| F01_cb4444_c33/flp0/3036-1F | GRAS  | TF |
| F01_cb4444_c33/flp0/3036-2F | GRAS  | TF |
| F01_cb4449_c1/f2p0/3029-2F  | BES1  | TF |
| F01_cb4449_c10/flp0/3005-0F | BES1  | TF |
| F01_cb4449_c11/flp1/3044-1F | BES1  | TF |
| F01_cb4449_c14/f4p1/3073-1F | BES1  | TF |
| F01_cb4449_c4/flp0/3414-1F  | BES1  | TF |
| F01_cb4449_c6/flp0/3358-0F  | BES1  | TF |
| F01_cb4449_c7/flp0/2856-0F  | BES1  | TF |
| F01_cb4449_c8/flp0/2993-1F  | BES1  | TF |
| F01_cb4449_c9/flp0/2969-0F  | BES1  | TF |
| F01_cb4450_c0/flp0/3343-0F  | CSD   | TF |
| F01_cb4450_c1/flp0/3275-0F  | CSD   | TF |
| F01_cb4465_c0/f2p0/3328-2F  | mTERF | TR |
| F01_cb4465_c1/flp0/2776-1F  | mTERF | TR |
| F01_cb4465_c2/flp0/2714-0F  | mTERF | TR |
| F01_cb446_c14/flp1/2839-0F  | EIL   | TF |
| F01_cb446_c16/flp0/2478-0F  | EIL   | TF |
| F01_cb446_c16/flp0/2478-2F  | EIL   | TF |
| F01_cb446_c17/flp0/2292-1F  | EIL   | TF |
| F01_cb446_c18/flp0/2198-0F  | EIL   | TF |
| F01_cb446_c24/flp3/3787-0F  | EIL   | TF |
| F01_cb446_c27/flp0/2708-0F  | EIL   | TF |

---

---

|                             |      |    |
|-----------------------------|------|----|
| F01_cb446_c28/f1p0/2688-1F  | EIL  | TF |
| F01_cb446_c32/f1p0/2721-0F  | EIL  | TF |
| F01_cb446_c32/f1p0/2721-1F  | EIL  | TF |
| F01_cb446_c4/f1p1/2601-0F   | EIL  | TF |
| F01_cb446_c4/f1p1/2601-1F   | EIL  | TF |
| F01_cb446_c4/f1p1/2601-2F   | EIL  | TF |
| F01_cb446_c45/f1p0/2393-0F  | EIL  | TF |
| F01_cb446_c45/f1p0/2393-2F  | EIL  | TF |
| F01_cb446_c48/f1p0/2961-0F  | EIL  | TF |
| F01_cb446_c49/f1p0/2765-0F  | EIL  | TF |
| F01_cb446_c49/f1p0/2765-1F  | EIL  | TF |
| F01_cb446_c51/f1p0/2635-1F  | EIL  | TF |
| F01_cb446_c53/f1p0/2944-2F  | EIL  | TF |
| F01_cb446_c54/f1p0/2863-2F  | EIL  | TF |
| F01_cb446_c55/f1p1/2586-0F  | EIL  | TF |
| F01_cb446_c57/f1p2/2685-1F  | EIL  | TF |
| F01_cb446_c65/f1p0/1483-2F  | EIL  | TF |
| F01_cb4478_c1/f1p0/3008-2F  | GNAT | TR |
| F01_cb4480_c0/f4p0/2037-1F  | NAC  | TF |
| F01_cb4480_c10/f1p0/2307-0F | NAC  | TF |
| F01_cb4480_c13/f1p0/1871-1F | NAC  | TF |
| F01_cb4480_c16/f3p0/2035-2F | NAC  | TF |
| F01_cb4480_c3/f1p0/3336-2F  | NAC  | TF |
| F01_cb4480_c4/f1p0/3113-1F  | NAC  | TF |
| F01_cb4480_c7/f1p0/1963-0F  | NAC  | TF |
| F01_cb4480_c7/f1p0/1963-1F  | NAC  | TF |

---

---

|                             |             |    |
|-----------------------------|-------------|----|
| F01_cb4494_c1/f1p0/3279-0F  | ARID        | TR |
| F01_cb4494_c2/f1p0/2761-0F  | ARID        | TR |
| F01_cb4494_c3/f1p0/2950-1F  | ARID        | TR |
| F01_cb4494_c7/f1p0/2870-1F  | ARID        | TR |
| F01_cb4520_c1/f4p0/2353-1F  | C3H         | TF |
| F01_cb4520_c2/f1p0/3324-0F  | C3H         | TF |
| F01_cb4520_c3/f1p0/2384-1F  | C3H         | TF |
| F01_cb4520_c5/f1p0/2430-1F  | C3H         | TF |
| F01_cb4520_c7/f1p0/2404-0F  | C3H         | TF |
| F01_cb4520_c9/f5p0/2406-2F  | C3H         | TF |
| F01_cb4529_c10/f1p0/746-2F  | zf-HD       | TF |
| F01_cb4529_c13/f1p0/614-0F  | zf-HD       | TF |
| F01_cb4529_c16/f2p0/753-2F  | zf-HD       | TF |
| F01_cb4529_c5/f1p0/3304-1F  | zf-HD       | TF |
| F01_cb4529_c6/f1p2/4180-1F  | zf-HD       | TF |
| F01_cb4529_c8/f1p0/838-2F   | zf-HD       | TF |
| F01_cb4529_c9/f1p0/780-2F   | zf-HD       | TF |
| F01_cb4541_c0/f2p0/3319-0F  | bHLH        | TF |
| F01_cb4541_c2/f1p0/1238-0F  | bHLH        | TF |
| F01_cb458_c13/f1p0/5055-2F  | PHD         | TR |
| F01_cb4594_c3/f1p0/6274-2F  | DDT         | TR |
| F01_cb4594_c4/f1p0/6003-0F  | DDT         | TR |
| F01_cb4594_c4/f1p0/6003-2F  | PHD         | TR |
| F01_cb4604_c18/f1p0/3255-2F | TRAF        | TR |
| F01_cb4604_c19/f1p0/2042-1F | TRAF        | TR |
| F01_cb4634_c9/f1p0/2221-1R  | MADS-M-type | TF |

---

---

|                             |              |    |
|-----------------------------|--------------|----|
| F01_cb4635_c2/f1p0/2072-0F  | C2C2-CO-like | TF |
| F01_cb4635_c3/f1p0/1855-1F  | C2C2-CO-like | TF |
| F01_cb4635_c4/f1p0/1745-2F  | C2C2-CO-like | TF |
| F01_cb4662_c0/f2p0/3283-1F  | FAR1         | TF |
| F01_cb4662_c1/f2p0/1138-2F  | FAR1         | TF |
| F01_cb4667_c4/f1p2/3118-1F  | FAR1         | TF |
| F01_cb4667_c7/f1p0/3276-2F  | FAR1         | TF |
| F01_cb4670_c1/f3p0/1598-0F  | bHLH         | TF |
| F01_cb4670_c10/f1p0/1465-2F | bHLH         | TF |
| F01_cb4670_c2/f2p0/1545-2F  | bHLH         | TF |
| F01_cb4670_c4/f1p0/2273-2F  | bHLH         | TF |
| F01_cb4670_c7/f1p0/1514-0F  | bHLH         | TF |
| F01_cb4670_c8/f1p0/1376-0F  | bHLH         | TF |
| F01_cb4670_c9/f2p0/1564-1F  | bHLH         | TF |
| F01_cb4684_c13/f1p0/2905-0F | C2H2         | TF |
| F01_cb4684_c3/f1p0/3284-0F  | C2H2         | TF |
| F01_cb4707_c4/f1p0/6741-0F  | PHD          | TR |
| F01_cb4710_c0/f1p0/3208-0F  | SET          | TR |
| F01_cb4710_c4/f1p0/6822-1F  | SET          | TR |
| F01_cb4737_c0/f3p0/2432-1F  | C2H2         | TF |
| F01_cb4737_c3/f1p0/2429-0F  | C2H2         | TF |
| F01_cb4745_c0/f12p0/3046-1F | GRAS         | TF |
| F01_cb4745_c12/f1p0/2017-0F | GRAS         | TF |
| F01_cb4745_c17/f1p0/2837-2F | GRAS         | TF |
| F01_cb4745_c18/f1p0/3074-0F | GRAS         | TF |
| F01_cb4745_c19/f1p0/3044-0F | GRAS         | TF |

---

---

|                             |      |    |
|-----------------------------|------|----|
| F01_cb4745_c19/f1p0/3044-2F | GRAS | TF |
| F01_cb4745_c2/f4p1/3063-1F  | GRAS | TF |
| F01_cb4745_c25/f7p0/2733-0F | GRAS | TF |
| F01_cb4745_c7/f1p0/3655-1F  | GRAS | TF |
| F01_cb4745_c8/f1p0/2875-0F  | GRAS | TF |
| F01_cb4752_c2/f1p0/3014-0F  | B3   | TF |
| F01_cb4752_c3/f1p0/2513-1F  | B3   | TF |
| F01_cb4752_c3/f1p0/2513-2F  | B3   | TF |
| F01_cb4755_c12/f2p0/2459-0F | C3H  | TF |
| F01_cb4755_c3/f2p0/2543-1F  | C3H  | TF |
| F01_cb4755_c5/f1p0/2534-1F  | C3H  | TF |
| F01_cb4755_c6/f1p0/2908-2F  | C3H  | TF |
| F01_cb4755_c7/f1p0/3105-2F  | C3H  | TF |
| F01_cb4790_c15/f1p1/2582-1F | GRAS | TF |
| F01_cb4790_c3/f2p1/2340-2F  | GRAS | TF |
| F01_cb4790_c4/f1p0/3257-2F  | GRAS | TF |
| F01_cb4790_c8/f1p1/2558-0F  | GRAS | TF |
| F01_cb4790_c8/f1p1/2558-1F  | GRAS | TF |
| F01_cb4818_c0/f3p0/1481-0F  | B3   | TF |
| F01_cb4818_c0/f3p0/1481-2F  | B3   | TF |
| F01_cb4818_c1/f2p0/3114-0F  | B3   | TF |
| F01_cb4818_c1/f2p0/3114-2F  | B3   | TF |
| F01_cb4818_c2/f1p0/3199-0F  | B3   | TF |
| F01_cb4818_c2/f1p0/3199-2F  | B3   | TF |
| F01_cb4818_c4/f1p0/2037-0F  | B3   | TF |
| F01_cb4818_c5/f1p0/1549-0F  | B3   | TF |

---

---

|                             |              |    |
|-----------------------------|--------------|----|
| F01_cb4835_c1/f3p1/2340-1F  | bHLH         | TF |
| F01_cb4835_c11/f1p0/2717-0F | bHLH         | TF |
| F01_cb4835_c12/f1p0/2189-1F | bHLH         | TF |
| F01_cb4835_c2/f3p0/2243-0F  | bHLH         | TF |
| F01_cb4835_c7/f1p0/2458-0F  | bHLH         | TF |
| F01_cb4835_c8/f1p0/2582-0F  | bHLH         | TF |
| F01_cb4835_c9/f1p0/2177-1F  | bHLH         | TF |
| F01_cb4842_c0/f1p0/3243-2F  | HB-HD-ZIP    | TF |
| F01_cb4842_c1/f1p0/3389-1F  | HB-HD-ZIP    | TF |
| F01_cb4889_c64/f1p0/3070-1F | mTERF        | TR |
| F01_cb4889_c66/f1p1/3206-0F | mTERF        | TR |
| F01_cb4889_c66/f1p1/3206-1F | mTERF        | TR |
| F01_cb4889_c66/f1p1/3206-2F | mTERF        | TR |
| F01_cb4889_c72/f1p0/2961-0F | mTERF        | TR |
| F01_cb4889_c80/f1p0/3020-1F | mTERF        | TR |
| F01_cb4889_c86/f6p0/2960-1F | mTERF        | TR |
| F01_cb4925_c11/f1p2/3304-2F | FAR1         | TF |
| F01_cb4925_c12/f1p1/3169-2F | FAR1         | TF |
| F01_cb4925_c3/f2p2/3330-2F  | FAR1         | TF |
| F01_cb4934_c0/f1p0/3222-1F  | GARP-G2-like | TF |
| F01_cb4934_c0/f1p0/3222-2F  | Others       | TR |
| F01_cb4934_c1/f1p0/2571-1F  | Others       | TR |
| F01_cb4934_c2/f1p0/2274-1F  | Others       | TR |
| F01_cb4934_c7/f1p0/2934-0F  | GARP-G2-like | TF |
| F01_cb4942_c11/f1p1/1345-0F | AP2/ERF-ERF  | TF |
| F01_cb4942_c12/f1p1/1339-0F | AP2/ERF-ERF  | TF |

---



---

|                             |              |    |
|-----------------------------|--------------|----|
| F01_cb4942_c2/f3p0/1309-2F  | AP2/ERF-ERF  | TF |
| F01_cb4942_c5/f2p1/2283-1F  | AP2/ERF-ERF  | TF |
| F01_cb4942_c8/f1p0/2187-2F  | AP2/ERF-ERF  | TF |
| F01_cb4957_c0/f1p0/3218-0F  | HB-other     | TF |
| F01_cb4957_c1/f1p0/3205-1F  | HB-HD-ZIP    | TF |
| F01_cb4957_c12/f1p0/1876-0F | HB-HD-ZIP    | TF |
| F01_cb4957_c3/f1p0/3177-2F  | HB-HD-ZIP    | TF |
| F01_cb4957_c4/f1p0/3205-1F  | HB-HD-ZIP    | TF |
| F01_cb4957_c9/f1p0/3457-2F  | HB-HD-ZIP    | TF |
| F01_cb4959_c3/f1p0/3215-0F  | SET          | TR |
| F01_cb4959_c4/f1p0/2670-1F  | SET          | TR |
| F01_cb4959_c6/f1p1/2644-0F  | SET          | TR |
| F01_cb4959_c9/f3p1/2722-2F  | SET          | TR |
| F01_cb4968_c1/f1p0/3209-2F  | FAR1         | TF |
| F01_cb4968_c2/f1p0/2962-2F  | FAR1         | TF |
| F01_cb4968_c3/f1p0/2859-0F  | FAR1         | TF |
| F01_cb4968_c4/f1p0/2927-2F  | FAR1         | TF |
| F01_cb4968_c5/f1p0/2916-2F  | FAR1         | TF |
| F01_cb4968_c7/f1p0/2910-1F  | FAR1         | TF |
| F01_cb4973_c1/f1p0/3211-1F  | SWI/SNF-SWI3 | TR |
| F01_cb4973_c2/f1p1/2923-0F  | MYB-related  | TF |
| F01_cb4973_c2/f1p1/2923-1F  | SWI/SNF-SWI3 | TR |
| F01_cb4999_c14/f1p1/3238-1F | SET          | TR |
| F01_cb4999_c17/f1p1/3105-1F | SET          | TR |
| F01_cb4999_c18/f1p0/3066-1F | SET          | TR |
| F01_cb4999_c20/f1p0/5049-2F | SET          | TR |

---

---

|                             |             |    |
|-----------------------------|-------------|----|
| F01_cb4999_c22/f5p1/2954-2F | SET         | TR |
| F01_cb4999_c23/f5p0/2983-2F | SET         | TR |
| F01_cb4999_c3/f4p0/3051-2F  | SET         | TR |
| F01_cb4999_c7/f1p0/3156-1F  | SET         | TR |
| F01_cb500_c15/f1p0/4958-2R  | ARID        | TR |
| F01_cb501_c0/f1p0/4783-1F   | mTERF       | TR |
| F01_cb501_c1/f1p0/1961-0F   | mTERF       | TR |
| F01_cb501_c1/f1p0/1961-2F   | mTERF       | TR |
| F01_cb501_c11/f1p0/1842-0F  | mTERF       | TR |
| F01_cb501_c11/f1p0/1842-2F  | mTERF       | TR |
| F01_cb501_c12/f1p0/1810-1F  | mTERF       | TR |
| F01_cb501_c12/f1p0/1810-2F  | mTERF       | TR |
| F01_cb501_c2/f1p0/2192-2F   | mTERF       | TR |
| F01_cb501_c3/f1p0/2471-2F   | mTERF       | TR |
| F01_cb501_c4/f1p0/2008-2F   | mTERF       | TR |
| F01_cb501_c5/f1p0/2505-1F   | mTERF       | TR |
| F01_cb501_c6/f1p1/1929-2F   | mTERF       | TR |
| F01_cb501_c8/f1p0/1917-1F   | mTERF       | TR |
| F01_cb501_c9/f1p0/1876-1F   | mTERF       | TR |
| F01_cb5020_c0/f1p1/3058-1F  | SNF2        | TR |
| F01_cb5020_c2/f1p1/3434-2F  | SNF2        | TR |
| F01_cb5020_c3/f1p1/3328-2F  | SNF2        | TR |
| F01_cb5020_c4/f1p0/3090-1F  | SNF2        | TR |
| F01_cb5082_c0/f3p0/2540-2F  | MYB-related | TF |
| F01_cb5082_c10/f1p0/2806-0F | MYB-related | TF |
| F01_cb5082_c11/f1p0/2718-2F | MYB-related | TF |

---

---

|                             |             |    |
|-----------------------------|-------------|----|
| F01_cb5082_c12/f1p0/2668-2F | MYB-related | TF |
| F01_cb5082_c13/f1p0/2435-2F | MYB-related | TF |
| F01_cb5082_c2/f2p0/2585-0F  | MYB-related | TF |
| F01_cb5082_c5/f1p0/3051-1F  | MYB-related | TF |
| F01_cb5082_c7/f1p0/2984-0F  | MYB-related | TF |
| F01_cb5082_c8/f1p0/2811-0F  | MYB-related | TF |
| F01_cb5082_c9/f1p0/2437-2F  | MYB-related | TF |
| F01_cb5106_c11/f1p1/2803-2F | bHLH        | TF |
| F01_cb5106_c12/f1p0/2863-0F | bHLH        | TF |
| F01_cb5106_c6/f1p0/2987-1F  | bHLH        | TF |
| F01_cb5106_c7/f1p0/2281-1F  | bHLH        | TF |
| F01_cb5106_c8/f1p0/2333-0F  | bHLH        | TF |
| F01_cb5121_c1/f15p0/1009-0F | MADS-MIKC   | TF |
| F01_cb5121_c3/f1p0/3174-2F  | MADS-M-type | TF |
| F01_cb5121_c4/f1p0/2356-2F  | MADS-MIKC   | TF |
| F01_cb5121_c5/f1p0/1094-1F  | MADS-MIKC   | TF |
| F01_cb5173_c10/f1p0/2708-2F | FAR1        | TF |
| F01_cb5173_c11/f1p0/2729-2F | FAR1        | TF |
| F01_cb5173_c12/f1p0/2675-1F | FAR1        | TF |
| F01_cb5173_c12/f1p0/2675-2F | FAR1        | TF |
| F01_cb5173_c16/f6p0/2587-0F | FAR1        | TF |
| F01_cb5173_c17/f8p0/2561-1F | FAR1        | TF |
| F01_cb5173_c3/f5p0/2764-0F  | FAR1        | TF |
| F01_cb5173_c4/f2p0/2756-2F  | FAR1        | TF |
| F01_cb5173_c5/f1p0/3165-0F  | FAR1        | TF |
| F01_cb5173_c6/f1p0/3163-2F  | FAR1        | TF |

---

---

|                             |             |    |
|-----------------------------|-------------|----|
| F01_cb5173_c7/flp0/3308-2F  | FAR1        | TF |
| F01_cb5181_c1/f2p1/2850-2F  | C3H         | TF |
| F01_cb5181_c2/f2p2/3159-0F  | C3H         | TF |
| F01_cb5181_c7/flp0/3122-1F  | C3H         | TF |
| F01_cb5197_c4/flp0/3085-1F  | FAR1        | TF |
| F01_cb5197_c7/flp0/2919-1F  | FAR1        | TF |
| F01_cb5260_c2/flp0/1431-1F  | GeBP        | TF |
| F01_cb5265_c61/flp3/3584-1F | MYB-related | TF |
| F01_cb5265_c61/flp3/3584-2F | MYB-related | TF |
| F01_cb5265_c62/flp0/4128-0F | MYB         | TF |
| F01_cb5265_c64/flp0/3314-1F | MYB-related | TF |
| F01_cb5265_c66/flp0/3373-1F | MYB-related | TF |
| F01_cb5265_c66/flp0/3373-2F | MYB-related | TF |
| F01_cb5265_c70/flp0/3665-2F | MYB         | TF |
| F01_cb5265_c78/flp0/3290-0F | MYB         | TF |
| F01_cb5265_c79/flp0/3747-1F | MYB         | TF |
| F01_cb5265_c82/flp0/3653-1F | MYB         | TF |
| F01_cb5266_c2/f2p2/2704-2F  | MYB         | TF |
| F01_cb5266_c4/f2p3/2756-1F  | MYB         | TF |
| F01_cb5266_c5/f2p0/2731-2F  | MYB-related | TF |
| F01_cb5290_c11/f4p1/2778-0F | GARP-ARR-B  | TF |
| F01_cb5290_c18/flp0/3122-1F | GARP-ARR-B  | TF |
| F01_cb5290_c19/flp1/4140-1F | Others      | TR |
| F01_cb5290_c21/flp0/2764-2F | GARP-ARR-B  | TF |
| F01_cb5290_c22/flp1/3256-2F | Others      | TR |
| F01_cb5290_c32/flp1/2945-2F | GARP-ARR-B  | TF |

---

---

|                             |              |    |
|-----------------------------|--------------|----|
| F01_cb5290_c35/flp1/2948-2F | GARP-ARR-B   | TF |
| F01_cb5290_c38/flp0/3048-2F | GARP-ARR-B   | TF |
| F01_cb5290_c40/flp0/2998-1F | GARP-ARR-B   | TF |
| F01_cb5290_c41/flp1/3038-0F | GARP-ARR-B   | TF |
| F01_cb5290_c43/flp0/2774-1F | GARP-ARR-B   | TF |
| F01_cb5290_c45/flp0/2555-2F | GARP-G2-like | TF |
| F01_cb5290_c46/flp0/2814-0F | GARP-ARR-B   | TF |
| F01_cb5290_c50/flp0/2718-1F | GARP-G2-like | TF |
| F01_cb5290_c50/flp0/2718-2F | Others       | TR |
| F01_cb5290_c54/flp0/3428-2F | GARP-ARR-B   | TF |
| F01_cb5290_c64/flp0/3128-1F | GARP-ARR-B   | TF |
| F01_cb5290_c65/flp1/2785-2F | GARP-ARR-B   | TF |
| F01_cb5290_c66/flp1/2753-0F | GARP-ARR-B   | TF |
| F01_cb5290_c76/flp1/2767-2F | GARP-ARR-B   | TF |
| F01_cb5290_c79/flp0/2804-0F | GARP-ARR-B   | TF |
| F01_cb5306_c0/flp0/2026-2F  | AP2/ERF-AP2  | TF |
| F01_cb5306_c10/flp0/2569-1F | AP2/ERF-AP2  | TF |
| F01_cb5306_c13/flp0/2299-2F | AP2/ERF-AP2  | TF |
| F01_cb5306_c20/flp0/1640-2F | AP2/ERF-AP2  | TF |
| F01_cb5306_c4/flp0/3133-1F  | AP2/ERF-ERF  | TF |
| F01_cb5306_c5/flp0/2072-0F  | AP2/ERF-ERF  | TF |
| F01_cb5306_c6/flp0/2511-2F  | AP2/ERF-AP2  | TF |
| F01_cb5306_c8/flp0/1982-1F  | AP2/ERF-AP2  | TF |
| F01_cb5307_c0/flp0/3058-1F  | TRAF         | TR |
| F01_cb5307_c16/flp0/3281-0F | TRAF         | TR |
| F01_cb5307_c19/flp0/3110-0F | TRAF         | TR |

---

---

|                             |                |    |
|-----------------------------|----------------|----|
| F01_cb5307_c20/f1p0/3073-0F | TRAF           | TR |
| F01_cb5307_c22/f2p0/3012-0F | TRAF           | TR |
| F01_cb5307_c23/f1p0/2078-0F | TRAF           | TR |
| F01_cb5307_c3/f1p0/3130-0F  | TRAF           | TR |
| F01_cb5307_c4/f1p0/3484-1F  | TRAF           | TR |
| F01_cb5307_c7/f1p0/3894-2F  | TRAF           | TR |
| F01_cb5307_c9/f1p0/2902-2F  | TRAF           | TR |
| F01_cb5322_c10/f1p0/2639-2F | SWI/SNF-BAF60b | TR |
| F01_cb5322_c13/f1p0/2386-2F | SWI/SNF-BAF60b | TR |
| F01_cb5322_c16/f9p1/2635-0F | SWI/SNF-BAF60b | TR |
| F01_cb5322_c3/f1p0/3125-1F  | SWI/SNF-BAF60b | TR |
| F01_cb5322_c4/f1p1/2817-1F  | SWI/SNF-BAF60b | TR |
| F01_cb5322_c5/f1p0/2395-2F  | SWI/SNF-BAF60b | TR |
| F01_cb5326_c0/f5p2/2201-2F  | TCP            | TF |
| F01_cb5326_c1/f1p0/3125-1F  | TCP            | TF |
| F01_cb5326_c3/f1p2/2172-1F  | TCP            | TF |
| F01_cb5335_c1/f4p1/1501-1F  | WRKY           | TF |
| F01_cb5335_c11/f5p1/1426-0F | WRKY           | TF |
| F01_cb5335_c5/f1p0/2305-1F  | WRKY           | TF |
| F01_cb5335_c5/f1p0/2305-2F  | WRKY           | TF |
| F01_cb5335_c6/f1p0/2177-0F  | WRKY           | TF |
| F01_cb5335_c6/f1p0/2177-1F  | WRKY           | TF |
| F01_cb5335_c7/f1p1/1615-0F  | WRKY           | TF |
| F01_cb5335_c8/f1p1/1527-2F  | WRKY           | TF |
| F01_cb5335_c9/f1p1/1411-1F  | WRKY           | TF |
| F01_cb5340_c0/f1p0/3122-1R  | LUG            | TR |

---

---

|                             |              |    |
|-----------------------------|--------------|----|
| F01_cb5340_c1/flp0/3858-1R  | LUG          | TR |
| F01_cb5376_c3/flp0/1886-0F  | SET          | TR |
| F01_cb5376_c5/flp0/2140-1F  | SET          | TR |
| F01_cb5382_c1/f2p0/3096-1F  | GRAS         | TF |
| F01_cb5382_c2/flp0/2750-1F  | GRAS         | TF |
| F01_cb5382_c3/flp0/2584-0F  | GRAS         | TF |
| F01_cb5382_c3/flp0/2584-2F  | GRAS         | TF |
| F01_cb5388_c0/f3p0/2888-0F  | FAR1         | TF |
| F01_cb5388_c1/f2p0/2996-1F  | FAR1         | TF |
| F01_cb5388_c3/flp0/2658-0F  | FAR1         | TF |
| F01_cb5388_c4/flp0/2912-0F  | FAR1         | TF |
| F01_cb5419_c1/flp0/3099-0F  | bZIP         | TF |
| F01_cb5419_c2/flp1/3151-0F  | bZIP         | TF |
| F01_cb5419_c5/flp1/1827-0F  | bZIP         | TF |
| F01_cb5419_c6/flp0/1768-2F  | bZIP         | TF |
| F01_cb5419_c8/flp0/1620-0F  | bZIP         | TF |
| F01_cb5438_c3/flp0/3077-2F  | MYB-related  | TF |
| F01_cb5438_c6/flp0/2257-1F  | SWI/SNF-SWI3 | TR |
| F01_cb5438_c6/flp0/2257-2F  | MYB-related  | TF |
| F01_cb5438_c8/flp0/1725-0F  | SWI/SNF-SWI3 | TR |
| F01_cb5438_c8/flp0/1725-1F  | MYB-related  | TF |
| F01_cb5440_c8/flp1/3070-2F  | C3H          | TF |
| F01_cb5443_c0/f4p0/2482-1F  | Tify         | TF |
| F01_cb5443_c10/f2p0/2611-2F | Tify         | TF |
| F01_cb5443_c11/flp0/2439-2F | Tify         | TF |
| F01_cb5443_c16/flp0/772-1F  | Tify         | TF |

---

---

|                              |           |    |
|------------------------------|-----------|----|
| F01_cb5443_c4/f1p0/2834-0F   | Others    | TR |
| F01_cb5443_c4/f1p0/2834-2F   | Tify      | TF |
| F01_cb5443_c9/f1p0/2456-1F   | Tify      | TF |
| F01_cb5448_c2/f1p0/3092-2F   | HB-other  | TF |
| F01_cb5448_c3/f1p0/2987-1F   | HB-other  | TF |
| F01_cb5448_c4/f1p0/2656-0F   | HB-other  | TF |
| F01_cb5448_c5/f1p0/1537-0F   | HB-other  | TF |
| F01_cb5448_c6/f1p0/1531-1F   | HB-HD-ZIP | TF |
| F01_cb544_c11/f1p0/3876-2F   | ARID      | TR |
| F01_cb544_c12/f1p0/3783-1F   | ARID      | TR |
| F01_cb544_c15/f1p1/3794-1F   | ARID      | TR |
| F01_cb544_c17/f1p0/3934-2F   | ARID      | TR |
| F01_cb544_c22/f1p0/3760-2F   | ARID      | TR |
| F01_cb544_c23/f1p4/4136-2F   | ARID      | TR |
| F01_cb544_c26/f1p0/3748-2F   | ARID      | TR |
| F01_cb544_c6/f1p0/4746-0F    | ARID      | TR |
| F01_cb544_c7/f1p0/2959-0F    | ARID      | TR |
| F01_cb544_c8/f1p0/3991-1F    | ARID      | TR |
| F01_cb544_c9/f1p0/2694-0F    | ARID      | TR |
| F01_cb5450_c1/f1p0/2475-1F   | Jumonji   | TR |
| F01_cb5450_c2/f1p0/1563-0F   | Jumonji   | TR |
| F01_cb5533_c134/f1p0/2453-2F | SET       | TR |
| F01_cb5572_c0/f1p0/3104-1F   | B3-ARF    | TF |
| F01_cb5572_c1/f1p0/2760-1F   | B3        | TF |
| F01_cb5572_c2/f1p0/2959-2F   | B3-ARF    | TF |
| F01_cb5572_c4/f1p0/2711-2F   | B3-ARF    | TF |

---



---

|                              |      |    |
|------------------------------|------|----|
| F01_cb5609_c0/f4p0/2338-1F   | BSD  | TF |
| F01_cb5609_c2/f2p0/3059-2F   | BSD  | TF |
| F01_cb5643_c122/f3p0/2775-0F | C3H  | TF |
| F01_cb5643_c128/f1p0/1747-0F | C3H  | TF |
| F01_cb5643_c17/f3p1/2843-2F  | C3H  | TF |
| F01_cb5643_c25/f1p0/3322-2F  | C3H  | TF |
| F01_cb5643_c27/f1p0/2675-2F  | C3H  | TF |
| F01_cb5643_c35/f1p0/2675-1F  | C3H  | TF |
| F01_cb5643_c42/f1p0/3067-2F  | C3H  | TF |
| F01_cb5643_c44/f1p0/2460-0F  | C3H  | TF |
| F01_cb5643_c82/f1p0/2858-2F  | C3H  | TF |
| F01_cb5643_c83/f1p0/2526-0F  | C3H  | TF |
| F01_cb5643_c92/f1p0/2723-0F  | C3H  | TF |
| F01_cb5643_c99/f1p2/2746-2F  | C3H  | TF |
| F01_cb5655_c5/f1p1/3035-1F   | C3H  | TF |
| F01_cb5655_c6/f1p0/2784-1F   | C3H  | TF |
| F01_cb5659_c105/f4p0/2776-1F | bHLH | TF |
| F01_cb5659_c106/f1p1/2740-2F | bHLH | TF |
| F01_cb5659_c107/f4p4/2736-1F | bHLH | TF |
| F01_cb5659_c24/f3p0/3605-2F  | bHLH | TF |
| F01_cb5659_c44/f1p3/2486-2F  | bHLH | TF |
| F01_cb5659_c47/f1p0/2555-2F  | bHLH | TF |
| F01_cb5659_c58/f1p0/3341-2F  | bHLH | TF |
| F01_cb5659_c59/f1p6/2922-1F  | bHLH | TF |
| F01_cb5659_c60/f1p1/2659-2F  | bHLH | TF |
| F01_cb5659_c61/f1p0/2713-1F  | bHLH | TF |

---

---

|                              |         |    |
|------------------------------|---------|----|
| F01_cb5659_c71/f1p0/3069-1F  | bHLH    | TF |
| F01_cb5659_c74/f1p3/2885-2F  | bHLH    | TF |
| F01_cb5661_c2/f1p0/2927-0F   | GRAS    | TF |
| F01_cb5682_c13/f10p1/1353-1F | bHLH    | TF |
| F01_cb56_c2/f1p0/5001-2F     | SNF2    | TR |
| F01_cb56_c3/f1p0/4918-0F     | SNF2    | TR |
| F01_cb56_c3/f1p0/4918-1F     | SNF2    | TR |
| F01_cb56_c5/f1p0/4943-0F     | SNF2    | TR |
| F01_cb56_c5/f1p0/4943-1F     | SNF2    | TR |
| F01_cb5714_c1/f1p0/3032-2F   | NF-YC   | TF |
| F01_cb5714_c11/f1p0/1261-1F  | NF-YC   | TF |
| F01_cb5714_c12/f1p0/1223-0F  | NF-YC   | TF |
| F01_cb5714_c13/f1p0/1198-0F  | NF-YC   | TF |
| F01_cb5714_c15/f8p0/1309-2F  | NF-YC   | TF |
| F01_cb5714_c2/f1p0/2670-2F   | NF-YC   | TF |
| F01_cb5714_c3/f1p0/2759-0F   | NF-YC   | TF |
| F01_cb5714_c5/f1p0/3572-0F   | NF-YC   | TF |
| F01_cb5714_c6/f1p0/1426-1F   | NF-YC   | TF |
| F01_cb5714_c7/f1p0/1389-0F   | NF-YC   | TF |
| F01_cb5714_c8/f1p0/1350-2F   | NF-YC   | TF |
| F01_cb5752_c0/f1p0/3026-0F   | HB-BELL | TF |
| F01_cb5752_c1/f1p0/3028-0F   | HB-BELL | TF |
| F01_cb5781_c3/f1p1/3037-0F   | C3H     | TF |
| F01_cb5781_c4/f1p1/2033-1F   | C3H     | TF |
| F01_cb5781_c6/f1p0/2146-2F   | C3H     | TF |
| F01_cb5782_c1/f2p0/1642-1F   | Others  | TR |

---

---

|                             |        |    |
|-----------------------------|--------|----|
| F01_cb5782_c11/f1p1/1705-1F | Others | TR |
| F01_cb5782_c13/f2p0/1497-0F | Others | TR |
| F01_cb5782_c14/f1p0/1477-1F | Others | TR |
| F01_cb5786_c0/f1p0/3012-0F  | GRAS   | TF |
| F01_cb5786_c0/f1p0/3012-1F  | GRAS   | TF |
| F01_cb5786_c1/f1p0/2920-2F  | GRAS   | TF |
| F01_cb5819_c5/f1p0/2298-0F  | C3H    | TF |
| F01_cb5836_c1/f2p1/2232-1F  | GRAS   | TF |
| F01_cb5836_c2/f2p1/2315-0F  | GRAS   | TF |
| F01_cb5836_c2/f2p1/2315-2F  | GRAS   | TF |
| F01_cb5836_c6/f1p1/2301-2F  | GRAS   | TF |
| F01_cb5836_c7/f1p0/2197-2F  | GRAS   | TF |
| F01_cb584_c11/f1p0/3581-2F  | CAMTA  | TF |
| F01_cb584_c17/f1p1/3696-2F  | CAMTA  | TF |
| F01_cb584_c18/f1p0/3716-2F  | CAMTA  | TF |
| F01_cb584_c19/f1p0/3377-0F  | CAMTA  | TF |
| F01_cb584_c20/f1p0/4710-0F  | CAMTA  | TF |
| F01_cb584_c21/f1p0/3705-0F  | CAMTA  | TF |
| F01_cb584_c29/f1p0/4045-1F  | CAMTA  | TF |
| F01_cb584_c30/f1p0/3643-0F  | CAMTA  | TF |
| F01_cb584_c31/f1p0/4041-0F  | CAMTA  | TF |
| F01_cb584_c34/f1p0/3933-0F  | CAMTA  | TF |
| F01_cb584_c36/f1p0/3790-1F  | CAMTA  | TF |
| F01_cb584_c37/f1p0/3420-1F  | CAMTA  | TF |
| F01_cb584_c8/f1p0/4733-1F   | CAMTA  | TF |
| F01_cb5861_c0/f2p0/2964-2F  | FAR1   | TF |

---

---

|                              |              |    |
|------------------------------|--------------|----|
| F01_cb5861_c1/f1p0/2826-0F   | FAR1         | TF |
| F01_cb5890_c1/f1p0/2713-1F   | MYB-related  | TF |
| F01_cb5890_c4/f1p0/1073-2F   | MYB          | TF |
| F01_cb5891_c10/f1p0/2609-2F  | FAR1         | TF |
| F01_cb5891_c11/f1p0/2563-2F  | FAR1         | TF |
| F01_cb5891_c2/f1p0/3660-1F   | FAR1         | TF |
| F01_cb5891_c3/f1p0/3307-0F   | FAR1         | TF |
| F01_cb5891_c8/f1p0/2721-0F   | FAR1         | TF |
| F01_cb5891_c9/f1p0/2810-2F   | FAR1         | TF |
| F01_cb5896_c116/f1p1/3615-1F | CAMTA        | TF |
| F01_cb5896_c119/f1p3/3813-0F | CAMTA        | TF |
| F01_cb5896_c119/f1p3/3813-2F | CAMTA        | TF |
| F01_cb5896_c123/f1p1/3585-0F | CAMTA        | TF |
| F01_cb5896_c134/f1p0/4910-0F | PHD          | TR |
| F01_cb5896_c135/f1p0/4855-1F | PHD          | TR |
| F01_cb5896_c15/f2p1/3602-0F  | CAMTA        | TF |
| F01_cb5896_c157/f1p0/3375-0F | HMG          | TR |
| F01_cb5896_c172/f9p0/3714-1F | CAMTA        | TF |
| F01_cb5931_c10/f1p1/2616-1F  | GARP-G2-like | TF |
| F01_cb5931_c11/f1p0/2398-2F  | GARP-G2-like | TF |
| F01_cb5931_c12/f1p0/2152-0F  | GARP-G2-like | TF |
| F01_cb5931_c14/f1p0/2172-0F  | GARP-G2-like | TF |
| F01_cb5931_c17/f1p0/2381-0F  | GARP-G2-like | TF |
| F01_cb5931_c18/f1p0/2066-0F  | GARP-G2-like | TF |
| F01_cb5931_c19/f2p1/1950-1F  | GARP-G2-like | TF |
| F01_cb5931_c2/f3p0/1968-2F   | GARP-G2-like | TF |

---

---

|                             |              |    |
|-----------------------------|--------------|----|
| F01_cb5931_c3/f1p0/2877-1F  | GARP-G2-like | TF |
| F01_cb5931_c4/f1p0/2378-1F  | GARP-G2-like | TF |
| F01_cb5931_c5/f1p0/3756-0F  | GARP-G2-like | TF |
| F01_cb5931_c6/f1p0/2315-0F  | GARP-G2-like | TF |
| F01_cb5931_c8/f1p0/3091-2F  | GARP-G2-like | TF |
| F01_cb5931_c9/f1p0/2483-2F  | GARP-G2-like | TF |
| F01_cb5944_c13/f1p0/2333-0F | PHD          | TR |
| F01_cb5944_c15/f1p0/2797-2F | PHD          | TR |
| F01_cb5944_c17/f1p0/2892-2F | PHD          | TR |
| F01_cb5944_c7/f2p0/2904-0F  | PHD          | TR |
| F01_cb5959_c1/f1p0/2966-0F  | SBP          | TF |
| F01_cb5959_c2/f1p0/2748-1F  | SBP          | TF |
| F01_cb5959_c3/f1p0/2121-2F  | SBP          | TF |
| F01_cb5959_c6/f1p0/2817-0F  | SBP          | TF |
| F01_cb5996_c0/f6p0/1399-0F  | NAC          | TF |
| F01_cb5996_c3/f2p0/2942-1F  | NAC          | TF |
| F01_cb5996_c3/f2p0/2942-2F  | NAC          | TF |
| F01_cb5996_c4/f1p0/1602-0F  | NAC          | TF |
| F01_cb603_c12/f1p0/2110-2F  | B3           | TF |
| F01_cb603_c13/f1p0/1717-1F  | B3           | TF |
| F01_cb603_c16/f3p0/2747-0F  | B3-ARF       | TF |
| F01_cb603_c3/f1p0/4729-2F   | B3           | TF |
| F01_cb603_c4/f1p0/2531-1F   | B3-ARF       | TF |
| F01_cb603_c5/f1p0/4497-2F   | B3           | TF |
| F01_cb603_c7/f1p0/3143-0F   | B3-ARF       | TF |
| F01_cb603_c8/f1p0/2924-1F   | B3-ARF       | TF |

---

---

|                             |      |    |
|-----------------------------|------|----|
| F01_cb6054_c15/flp8/2510-0F | GRAS | TF |
| F01_cb6054_c15/flp8/2510-2F | GRAS | TF |
| F01_cb6054_c19/flp0/2621-0F | GRAS | TF |
| F01_cb6054_c20/flp0/2610-1F | GRAS | TF |
| F01_cb6054_c23/flp2/2316-0F | GRAS | TF |
| F01_cb6054_c29/flp0/1952-1F | GRAS | TF |
| F01_cb6054_c29/flp0/1952-2F | GRAS | TF |
| F01_cb6054_c31/flp0/2404-0F | GRAS | TF |
| F01_cb6054_c33/flp0/1690-1F | GRAS | TF |
| F01_cb6066_c0/flp1/2945-1F  | GNAT | TR |
| F01_cb6066_c2/flp0/2806-1F  | GNAT | TR |
| F01_cb6066_c3/flp0/2479-2F  | GNAT | TR |
| F01_cb6066_c4/flp0/2044-0F  | GNAT | TR |
| F01_cb6066_c6/flp0/2056-2F  | GNAT | TR |
| F01_cb6066_c7/flp0/1915-0F  | GNAT | TR |
| F01_cb6091_c1/flp0/3658-0F  | C3H  | TF |
| F01_cb6091_c1/flp0/3658-1F  | C3H  | TF |
| F01_cb6101_c1/flp0/2933-1F  | SET  | TR |
| F01_cb6101_c2/flp0/3506-0F  | SET  | TR |
| F01_cb6101_c3/flp0/2953-0F  | SET  | TR |
| F01_cb6101_c4/flp0/2753-1F  | SET  | TR |
| F01_cb6101_c5/flp0/2887-0F  | SET  | TR |
| F01_cb611_c0/flp0/4704-1R   | LOB  | TF |
| F01_cb611_c4/flp0/3672-1R   | LOB  | TF |
| F01_cb611_c4/flp0/3672-2R   | LOB  | TF |
| F01_cb611_c6/flp0/5294-1R   | LOB  | TF |

---

---

|                             |              |    |
|-----------------------------|--------------|----|
| F01_cb611_c7/flp0/5234-2R   | LOB          | TF |
| F01_cb611_c8/flp0/5147-1R   | LOB          | TF |
| F01_cb6134_c12/flp0/1381-0F | AUX/IAA      | TR |
| F01_cb6134_c14/flp0/1378-0F | AUX/IAA      | TR |
| F01_cb6134_c15/flp0/1342-1F | AUX/IAA      | TR |
| F01_cb6134_c18/f9p0/1403-0F | AUX/IAA      | TR |
| F01_cb6134_c18/f9p0/1403-2F | AUX/IAA      | TR |
| F01_cb6134_c5/f2p0/1354-2F  | AUX/IAA      | TR |
| F01_cb6134_c6/flp0/2931-1F  | AUX/IAA      | TR |
| F01_cb6134_c6/flp0/2931-2F  | AUX/IAA      | TR |
| F01_cb6134_c7/flp0/3186-0F  | AUX/IAA      | TR |
| F01_cb6134_c7/flp0/3186-2F  | AUX/IAA      | TR |
| F01_cb6134_c8/flp1/1608-0F  | AUX/IAA      | TR |
| F01_cb6134_c9/flp1/1566-1F  | AUX/IAA      | TR |
| F01_cb6147_c0/f6p0/2154-0F  | HB-other     | TF |
| F01_cb6147_c26/flp0/2002-0F | HB-other     | TF |
| F01_cb6147_c29/flp0/2193-0F | HB-other     | TF |
| F01_cb6147_c38/flp0/2414-1F | HB-other     | TF |
| F01_cb6176_c0/f2p0/2824-2F  | SNF2         | TR |
| F01_cb6176_c1/flp0/2916-2F  | SNF2         | TR |
| F01_cb6176_c2/flp1/3003-0F  | SNF2         | TR |
| F01_cb6185_c11/flp0/2334-2F | GARP-ARR-B   | TF |
| F01_cb6185_c13/flp0/2793-0F | Others       | TR |
| F01_cb6185_c13/flp0/2793-2F | GARP-G2-like | TF |
| F01_cb6185_c14/flp0/2545-1F | GARP-G2-like | TF |
| F01_cb6185_c18/flp0/2593-2F | GARP-ARR-B   | TF |

---

---

|                             |            |    |
|-----------------------------|------------|----|
| F01_cb6185_c5/f1p0/2923-2F  | GARP-ARR-B | TF |
| F01_cb6185_c6/f1p0/2824-0F  | GARP-ARR-B | TF |
| F01_cb6185_c8/f1p0/2436-1F  | GARP-ARR-B | TF |
| F01_cb61_c1/f2p1/4638-2F    | Jumonji    | TR |
| F01_cb61_c2/f1p0/4986-2F    | Jumonji    | TR |
| F01_cb61_c3/f1p0/4610-0F    | Jumonji    | TR |
| F01_cb61_c3/f1p0/4610-2F    | Jumonji    | TR |
| F01_cb6203_c3/f1p0/2225-0F  | SET        | TR |
| F01_cb6239_c10/f1p0/2664-0F | SNF2       | TR |
| F01_cb6239_c11/f1p0/2522-0F | SNF2       | TR |
| F01_cb6239_c12/f1p0/2697-1F | SNF2       | TR |
| F01_cb6239_c12/f1p0/2697-2F | SNF2       | TR |
| F01_cb6239_c2/f1p0/3034-2F  | SNF2       | TR |
| F01_cb6239_c3/f1p0/2984-0F  | SNF2       | TR |
| F01_cb6239_c3/f1p0/2984-1F  | SNF2       | TR |
| F01_cb6239_c4/f1p0/2736-0F  | SNF2       | TR |
| F01_cb6239_c6/f1p1/2671-1F  | SNF2       | TR |
| F01_cb6239_c7/f1p0/2012-2F  | SNF2       | TR |
| F01_cb6239_c8/f1p0/2559-1F  | SNF2       | TR |
| F01_cb6239_c9/f1p0/2413-2F  | SNF2       | TR |
| F01_cb6259_c14/f1p0/2936-1F | HB-BELL    | TF |
| F01_cb6259_c16/f1p0/2866-0F | HB-BELL    | TF |
| F01_cb6259_c17/f1p0/2839-2F | HB-other   | TF |
| F01_cb6259_c20/f3p0/2786-1F | HB-BELL    | TF |
| F01_cb6259_c21/f1p0/1419-2F | HB-other   | TF |
| F01_cb6259_c3/f1p1/2898-1F  | HB-other   | TF |

---



---

|                            |          |    |
|----------------------------|----------|----|
| F01_cb6259_c4/flp0/2869-2F | HB-other | TF |
| F01_cb6259_c6/flp0/3911-1F | HB-BELL  | TF |
| F01_cb6259_c7/flp0/2932-2F | HB-other | TF |
| F01_cb6259_c8/flp0/2869-1F | HB-BELL  | TF |
| F01_cb626_c14/flp0/2874-1F | Others   | TR |
| F01_cb626_c15/flp0/3353-2F | Others   | TR |
| F01_cb626_c16/flp0/3290-2F | Others   | TR |
| F01_cb626_c17/flp0/4935-0F | B3-ARF   | TF |
| F01_cb626_c39/flp0/2478-1F | AUX/IAA  | TR |
| F01_cb626_c40/flp3/4315-2F | B3-ARF   | TF |
| F01_cb626_c41/flp1/4495-1F | B3-ARF   | TF |
| F01_cb626_c52/flp0/4764-2F | B3-ARF   | TF |
| F01_cb626_c57/flp0/4032-0F | B3-ARF   | TF |
| F01_cb626_c58/flp1/3731-1F | B3       | TF |
| F01_cb626_c59/flp0/4159-0F | AUX/IAA  | TR |
| F01_cb626_c60/flp1/4254-0F | B3-ARF   | TF |
| F01_cb626_c61/flp0/3800-0F | B3-ARF   | TF |
| F01_cb626_c62/flp1/4231-1F | AUX/IAA  | TR |
| F01_cb626_c62/flp1/4231-2F | B3-ARF   | TF |
| F01_cb626_c66/flp0/2695-2F | AUX/IAA  | TR |
| F01_cb626_c67/flp1/4388-2F | B3-ARF   | TF |
| F01_cb626_c68/flp1/4195-0F | B3-ARF   | TF |
| F01_cb626_c68/flp1/4195-2F | AUX/IAA  | TR |
| F01_cb626_c77/flp0/3018-1F | Others   | TR |
| F01_cb626_c78/flp0/5392-0F | B3-ARF   | TF |
| F01_cb626_c79/flp0/5202-0F | AUX/IAA  | TR |

---

---

|                            |             |    |
|----------------------------|-------------|----|
| F01_cb626_c79/f1p0/5202-1F | B3-ARF      | TF |
| F01_cb626_c8/f4p1/4379-2F  | B3-ARF      | TF |
| F01_cb626_c89/f1p0/4168-1F | B3          | TF |
| F01_cb626_c91/f1p0/2043-2F | AUX/IAA     | TR |
| F01_cb6313_c0/f2p0/1113-1F | C2C2-YABBY  | TF |
| F01_cb6313_c2/f1p0/2578-1F | C2C2-YABBY  | TF |
| F01_cb6313_c4/f1p0/773-1F  | C2C2-YABBY  | TF |
| F01_cb6320_c0/f6p0/1902-0F | WRKY        | TF |
| F01_cb6320_c1/f2p0/1818-0F | WRKY        | TF |
| F01_cb6320_c2/f1p0/2874-0F | WRKY        | TF |
| F01_cb6320_c2/f1p0/2874-1F | WRKY        | TF |
| F01_cb6354_c0/f1p0/2876-1F | MYB-related | TF |
| F01_cb6354_c1/f1p0/2101-0F | MYB-related | TF |
| F01_cb6362_c0/f4p0/1243-0F | Rcd1-like   | TR |
| F01_cb6362_c1/f2p1/1377-0F | Rcd1-like   | TR |
| F01_cb6362_c1/f2p1/1377-2F | Rcd1-like   | TR |
| F01_cb6362_c2/f2p1/1459-1F | Rcd1-like   | TR |
| F01_cb6362_c3/f1p1/2875-0F | Rcd1-like   | TR |
| F01_cb6362_c3/f1p1/2875-1F | Rcd1-like   | TR |
| F01_cb6362_c3/f1p1/2875-2F | Rcd1-like   | TR |
| F01_cb6362_c4/f1p1/2389-2F | Rcd1-like   | TR |
| F01_cb6362_c6/f1p0/1222-0F | Rcd1-like   | TR |
| F01_cb6364_c1/f1p0/3064-1F | SET         | TR |
| F01_cb6364_c2/f1p0/1346-1F | SET         | TR |
| F01_cb6381_c0/f5p1/2779-2F | MYB         | TF |
| F01_cb6381_c1/f1p0/2872-2F | MYB         | TF |

---

---

|                              |              |    |
|------------------------------|--------------|----|
| F01_cb6381_c3/flp0/2832-2F   | MYB          | TF |
| F01_cb6381_c4/flp0/2208-2F   | MYB          | TF |
| F01_cb6390_c7/flp0/2169-0F   | TRAF         | TR |
| F01_cb6391_c11/flp0/2658-1F  | WRKY         | TF |
| F01_cb6391_c12/flp0/2288-1F  | WRKY         | TF |
| F01_cb6391_c13/flp0/2480-0F  | WRKY         | TF |
| F01_cb6391_c14/flp1/2258-0F  | WRKY         | TF |
| F01_cb6391_c15/flp0/2088-2F  | WRKY         | TF |
| F01_cb6391_c2/f2p0/2236-1F   | WRKY         | TF |
| F01_cb6391_c3/f2p0/2237-2F   | WRKY         | TF |
| F01_cb6391_c4/flp0/2869-0F   | WRKY         | TF |
| F01_cb6391_c4/flp0/2869-1F   | WRKY         | TF |
| F01_cb6391_c5/flp0/2187-0F   | WRKY         | TF |
| F01_cb6391_c5/flp0/2187-1F   | WRKY         | TF |
| F01_cb6391_c5/flp0/2187-2F   | WRKY         | TF |
| F01_cb6391_c7/flp0/2310-2F   | WRKY         | TF |
| F01_cb6391_c9/flp0/2400-1F   | WRKY         | TF |
| F01_cb6392_c2/flp1/2869-0F   | HB-HD-ZIP    | TF |
| F01_cb6419_c10/flp4/1748-1F  | C2C2-CO-like | TF |
| F01_cb6419_c17/flp2/1539-2F  | Others       | TR |
| F01_cb6419_c21/flp0/871-1F   | Others       | TR |
| F01_cb6419_c22/flp0/859-1F   | Others       | TR |
| F01_cb6419_c25/f35p3/1510-0F | C2C2-CO-like | TF |
| F01_cb6419_c3/f2p0/2540-1F   | Others       | TR |
| F01_cb6419_c3/f2p0/2540-2F   | DBB          | TF |
| F01_cb6461_c0/flp0/2849-0F   | HSF          | TF |

---

---

|                             |              |    |
|-----------------------------|--------------|----|
| F01_cb6463_c10/flp0/1943-1F | C2H2         | TF |
| F01_cb6463_c17/flp0/1732-0F | C2H2         | TF |
| F01_cb6463_c2/f3p0/2023-0F  | C2H2         | TF |
| F01_cb6463_c5/flp0/2822-1F  | C2H2         | TF |
| F01_cb6463_c6/flp0/2024-2F  | C2H2         | TF |
| F01_cb6463_c7/flp0/2061-2F  | C2H2         | TF |
| F01_cb6473_c2/flp1/2843-0R  | C3H          | TF |
| F01_cb6482_c0/flp0/2844-1F  | EIL          | TF |
| F01_cb6482_c4/flp0/2701-1F  | EIL          | TF |
| F01_cb6482_c5/flp0/2610-1F  | EIL          | TF |
| F01_cb6482_c5/flp0/2610-2F  | EIL          | TF |
| F01_cb6504_c0/flp0/2844-0F  | C2C2-YABBY   | TF |
| F01_cb6504_c0/flp0/2844-1F  | C2C2-YABBY   | TF |
| F01_cb6504_c1/flp0/2635-2F  | C2C2-YABBY   | TF |
| F01_cb6504_c3/flp0/1353-1F  | C2C2-YABBY   | TF |
| F01_cb6504_c4/flp0/1247-0F  | C2C2-YABBY   | TF |
| F01_cb6530_c13/f5p0/2532-0F | Pseudo ARR-B | TR |
| F01_cb6530_c18/flp1/2394-0F | Pseudo ARR-B | TR |
| F01_cb6530_c20/flp0/2957-1F | Pseudo ARR-B | TR |
| F01_cb6530_c21/flp0/2410-1F | Pseudo ARR-B | TR |
| F01_cb6530_c23/flp0/2764-0F | Others       | TR |
| F01_cb6530_c23/flp0/2764-2F | Others       | TR |
| F01_cb6530_c24/flp0/2522-0F | Others       | TR |
| F01_cb6530_c24/flp0/2522-2F | Others       | TR |
| F01_cb6530_c25/flp0/2502-1F | Others       | TR |
| F01_cb6530_c25/flp0/2502-2F | Others       | TR |

---

---

|                             |              |    |
|-----------------------------|--------------|----|
| F01_cb6530_c26/flp0/2387-1F | Pseudo ARR-B | TR |
| F01_cb6530_c27/flp0/2468-1F | Others       | TR |
| F01_cb6530_c35/flp0/2668-2F | Pseudo ARR-B | TR |
| F01_cb6530_c36/flp0/2516-2F | Pseudo ARR-B | TR |
| F01_cb6530_c37/flp1/2528-1F | Others       | TR |
| F01_cb6530_c37/flp1/2528-2F | Others       | TR |
| F01_cb6530_c44/flp0/2497-2F | Pseudo ARR-B | TR |
| F01_cb6530_c47/flp0/2752-1F | Pseudo ARR-B | TR |
| F01_cb6530_c5/flp0/2318-1F  | Pseudo ARR-B | TR |
| F01_cb6530_c52/flp0/2215-0F | Pseudo ARR-B | TR |
| F01_cb6530_c57/flp1/2343-0F | Others       | TR |
| F01_cb6530_c57/flp1/2343-2F | Others       | TR |
| F01_cb6530_c59/flp0/2656-1F | Others       | TR |
| F01_cb6530_c59/flp0/2656-2F | Others       | TR |
| F01_cb6530_c6/flp2/2387-1F  | Pseudo ARR-B | TR |
| F01_cb6530_c60/flp1/2213-0F | Pseudo ARR-B | TR |
| F01_cb6530_c62/flp0/2626-0F | Others       | TR |
| F01_cb6530_c62/flp0/2626-1F | Others       | TR |
| F01_cb6530_c63/flp1/2489-2F | Pseudo ARR-B | TR |
| F01_cb6530_c65/flp0/1913-0F | Others       | TR |
| F01_cb6530_c65/flp0/1913-1F | Others       | TR |
| F01_cb6530_c75/f4p0/2693-2F | Pseudo ARR-B | TR |
| F01_cb6530_c80/flp0/2511-0F | Others       | TR |
| F01_cb6530_c80/flp0/2511-1F | Others       | TR |
| F01_cb6533_c0/f5p1/2832-2F  | FAR1         | TF |
| F01_cb6548_c10/flp1/2515-2F | bZIP         | TF |

---

---

|                             |         |    |
|-----------------------------|---------|----|
| F01_cb6548_c12/flp1/2464-1F | bZIP    | TF |
| F01_cb6548_c13/flp1/2372-1F | bZIP    | TF |
| F01_cb6548_c16/flp0/2550-1F | bZIP    | TF |
| F01_cb6548_c17/flp1/2526-2F | bZIP    | TF |
| F01_cb6548_c2/f6p1/2451-1F  | bZIP    | TF |
| F01_cb6548_c7/flp3/4317-2F  | bZIP    | TF |
| F01_cb6548_c8/flp0/2532-0F  | bZIP    | TF |
| F01_cb6580_c2/flp0/1593-2F  | SET     | TR |
| F01_cb6588_c0/f3p0/1488-0F  | C2H2    | TF |
| F01_cb6588_c3/flp0/2893-0F  | C2H2    | TF |
| F01_cb6588_c4/flp0/2564-2F  | C2H2    | TF |
| F01_cb6588_c6/flp0/1563-2F  | C2H2    | TF |
| F01_cb6588_c7/flp0/1500-2F  | C2H2    | TF |
| F01_cb6596_c0/f2p0/2822-2F  | BBR-BPC | TF |
| F01_cb6596_c1/flp0/2804-0F  | BBR-BPC | TF |
| F01_cb6596_c2/flp0/1246-2F  | BBR-BPC | TF |
| F01_cb6596_c3/flp0/1178-0F  | BBR-BPC | TF |
| F01_cb6596_c4/flp0/1084-1F  | BBR-BPC | TF |
| F01_cb6605_c11/flp1/2320-2F | TUB     | TF |
| F01_cb6605_c12/flp0/1976-0F | TUB     | TF |
| F01_cb6605_c15/flp0/2422-0F | TUB     | TF |
| F01_cb6605_c16/flp0/2227-1F | TUB     | TF |
| F01_cb6605_c3/f2p2/2277-0F  | TUB     | TF |
| F01_cb6605_c3/f2p2/2277-1F  | TUB     | TF |
| F01_cb6605_c3/f2p2/2277-2F  | TUB     | TF |
| F01_cb6605_c6/flp0/2783-1F  | TUB     | TF |

---

---

|                             |              |    |
|-----------------------------|--------------|----|
| F01_cb6605_c7/f1p0/3797-1F  | TUB          | TF |
| F01_cb6626_c4/f1p0/3001-2F  | C3H          | TF |
| F01_cb6626_c5/f1p0/2902-2F  | C3H          | TF |
| F01_cb6649_c1/f4p0/1675-1F  | GARP-G2-like | TF |
| F01_cb6649_c5/f1p0/2845-0F  | GARP-G2-like | TF |
| F01_cb6649_c6/f1p0/2300-0F  | GARP-G2-like | TF |
| F01_cb6649_c7/f1p0/1804-2F  | GARP-G2-like | TF |
| F01_cb6649_c8/f1p0/1753-1F  | GARP-G2-like | TF |
| F01_cb666_c0/f1p0/4630-1F   | HSF          | TF |
| F01_cb666_c1/f1p0/4314-2F   | HSF          | TF |
| F01_cb666_c10/f1p0/2176-0F  | HSF          | TF |
| F01_cb666_c11/f1p0/2689-0F  | HSF          | TF |
| F01_cb666_c12/f1p0/3434-0F  | HSF          | TF |
| F01_cb666_c14/f1p0/2626-0F  | HSF          | TF |
| F01_cb666_c3/f1p0/2372-0F   | HSF          | TF |
| F01_cb666_c4/f1p0/2217-1F   | HSF          | TF |
| F01_cb666_c7/f1p0/2038-0F   | HSF          | TF |
| F01_cb666_c9/f1p0/2356-2F   | HSF          | TF |
| F01_cb6713_c0/f3p0/2459-2F  | TCP          | TF |
| F01_cb6713_c12/f1p0/2639-1F | TCP          | TF |
| F01_cb6713_c14/f1p0/2405-1F | TCP          | TF |
| F01_cb6713_c2/f2p0/2403-0F  | TCP          | TF |
| F01_cb6713_c3/f1p0/2796-2F  | TCP          | TF |
| F01_cb6713_c5/f1p0/2620-0F  | TCP          | TF |
| F01_cb6713_c8/f1p0/2659-2F  | TCP          | TF |
| F01_cb6715_c1/f1p0/4218-0F  | C3H          | TF |

---

---

|                              |             |    |
|------------------------------|-------------|----|
| F01_cb6715_c2/flp0/6268-0F   | C3H         | TF |
| F01_cb6716_c0/f2p2/2584-1F   | C2H2        | TF |
| F01_cb6716_c1/flp1/2898-0F   | C2H2        | TF |
| F01_cb6716_c2/flp1/2319-0F   | C2H2        | TF |
| F01_cb6716_c2/flp1/2319-2F   | C2H2        | TF |
| F01_cb6716_c3/flp0/2637-1F   | C2H2        | TF |
| F01_cb6716_c4/flp0/2291-2F   | C2H2        | TF |
| F01_cb6716_c6/flp0/2262-2F   | C2H2        | TF |
| F01_cb6737_c10/flp0/4156-0F  | MYB         | TF |
| F01_cb6758_c1/f3p0/1900-1F   | C3H         | TF |
| F01_cb6758_c2/flp0/2762-2F   | C3H         | TF |
| F01_cb6758_c3/flp0/2268-2F   | C3H         | TF |
| F01_cb6758_c7/flp0/1936-1F   | C3H         | TF |
| F01_cb6767_c31/fl3p0/2175-2F | TRAF        | TR |
| F01_cb6767_c7/flp0/2776-0F   | TRAF        | TR |
| F01_cb6770_c4/flp1/2671-1F   | FAR1        | TF |
| F01_cb6783_c0/f2p0/2589-2F   | AP2/ERF-ERF | TF |
| F01_cb6789_c5/flp0/2546-0F   | C3H         | TF |
| F01_cb6789_c7/flp0/2433-2F   | C3H         | TF |
| F01_cb6789_c9/flp0/2524-1F   | C3H         | TF |
| F01_cb6794_c0/f9p3/2687-1F   | TRAF        | TR |
| F01_cb6794_c12/flp1/2526-1F  | TRAF        | TR |
| F01_cb6794_c13/flp0/3113-2F  | TRAF        | TR |
| F01_cb6794_c14/flp3/2709-1F  | TRAF        | TR |
| F01_cb6794_c16/flp0/2530-1F  | TRAF        | TR |
| F01_cb6794_c16/flp0/2530-2F  | TRAF        | TR |

---



---

|                             |              |    |
|-----------------------------|--------------|----|
| F01_cb6794_c18/f1p1/2705-2F | TRAF         | TR |
| F01_cb6794_c19/f1p1/2702-2F | TRAF         | TR |
| F01_cb6794_c23/f1p1/2708-0F | TRAF         | TR |
| F01_cb6794_c24/f1p0/2733-2F | TRAF         | TR |
| F01_cb6794_c42/f1p0/2644-0F | TRAF         | TR |
| F01_cb6794_c42/f1p0/2644-1F | TRAF         | TR |
| F01_cb6794_c49/f6p1/2503-1F | TRAF         | TR |
| F01_cb6794_c53/f7p2/2471-0F | TRAF         | TR |
| F01_cb6794_c9/f2p0/2356-2F  | TRAF         | TR |
| F01_cb6802_c23/f1p0/4851-1F | NF-YA        | TF |
| F01_cb6802_c23/f1p0/4851-2F | NF-YA        | TF |
| F01_cb6802_c24/f1p0/4072-0F | NF-YA        | TF |
| F01_cb6802_c24/f1p0/4072-2F | NF-YA        | TF |
| F01_cb6802_c77/f1p0/2420-2F | NF-YA        | TF |
| F01_cb6808_c10/f1p1/2304-0F | HB-BELL      | TF |
| F01_cb6808_c2/f1p1/2723-1F  | HB-BELL      | TF |
| F01_cb6808_c4/f1p0/3737-1F  | HB-other     | TF |
| F01_cb6808_c9/f1p1/2175-1F  | HB-BELL      | TF |
| F01_cb6842_c0/f3p0/2759-2F  | SWI/SNF-SWI3 | TR |
| F01_cb6842_c1/f1p0/2588-1F  | SWI/SNF-SWI3 | TR |
| F01_cb6844_c1/f4p0/2603-2F  | CPP          | TF |
| F01_cb6844_c13/f9p0/2702-2F | CPP          | TF |
| F01_cb6844_c4/f2p0/2631-1F  | CPP          | TF |
| F01_cb6844_c4/f2p0/2631-2F  | CPP          | TF |
| F01_cb6844_c7/f1p0/2755-1F  | CPP          | TF |
| F01_cb6844_c9/f1p0/2576-1F  | CPP          | TF |

---

---

|                             |            |    |
|-----------------------------|------------|----|
| F01_cb6847_c0/f2p0/1252-0F  | BBR-BPC    | TF |
| F01_cb6847_c1/f2p0/2774-1F  | BBR-BPC    | TF |
| F01_cb6851_c0/flp0/2755-2F  | Alfin-like | TF |
| F01_cb6851_c1/flp0/4156-2F  | Alfin-like | TF |
| F01_cb6851_c2/flp0/2590-0F  | Alfin-like | TF |
| F01_cb6851_c3/flp0/1276-1F  | Alfin-like | TF |
| F01_cb6851_c4/flp0/1250-2F  | Alfin-like | TF |
| F01_cb6860_c0/flp1/2753-1F  | Others     | TR |
| F01_cb6860_c1/flp0/2277-0F  | Others     | TR |
| F01_cb6860_c2/flp0/2407-0F  | Others     | TR |
| F01_cb6860_c3/flp0/1781-0F  | Others     | TR |
| F01_cb6860_c4/flp0/1717-2F  | Others     | TR |
| F01_cb6867_c2/flp0/2663-2F  | HB-PHD     | TF |
| F01_cb6867_c3/flp0/2798-0F  | HB-PHD     | TF |
| F01_cb6870_c1/flp0/2924-0F  | FAR1       | TF |
| F01_cb6870_c2/flp0/1399-1F  | FAR1       | TF |
| F01_cb6914_c10/flp0/1914-1F | C2H2       | TF |
| F01_cb6914_c11/flp1/2301-0F | C2H2       | TF |
| F01_cb6914_c12/flp0/1983-2F | C2H2       | TF |
| F01_cb6914_c13/flp1/2216-0F | C2H2       | TF |
| F01_cb6914_c14/flp0/1958-0F | C2H2       | TF |
| F01_cb6914_c15/flp0/2278-2F | C2H2       | TF |
| F01_cb6914_c16/flp0/2349-2F | C2H2       | TF |
| F01_cb6914_c19/flp0/2036-0F | C2H2       | TF |
| F01_cb6914_c19/flp0/2036-2F | C2H2       | TF |
| F01_cb6914_c20/flp0/1923-1F | C2H2       | TF |

---

---

|                              |      |    |
|------------------------------|------|----|
| F01_cb6914_c21/flp1/2085-1F  | C2H2 | TF |
| F01_cb6914_c23/flp0/2011-0F  | C2H2 | TF |
| F01_cb6914_c4/flp0/2740-2F   | C2H2 | TF |
| F01_cb6914_c8/flp0/2191-0F   | C2H2 | TF |
| F01_cb6914_c9/flp0/2255-0F   | C2H2 | TF |
| F01_cb6924_c12/flp0/2411-2F  | GRAS | TF |
| F01_cb6924_c14/flp1/2407-0F  | GRAS | TF |
| F01_cb6924_c23/flp1/2456-0F  | GRAS | TF |
| F01_cb6924_c23/flp1/2456-1F  | GRAS | TF |
| F01_cb6924_c26/flp1/2295-2F  | GRAS | TF |
| F01_cb6924_c3/f2p1/2334-0F   | GRAS | TF |
| F01_cb6924_c3/f2p1/2334-1F   | GRAS | TF |
| F01_cb6924_c3/f2p1/2334-2F   | GRAS | TF |
| F01_cb6924_c34/f25p2/2370-0F | GRAS | TF |
| F01_cb6924_c6/flp2/2739-0F   | GRAS | TF |
| F01_cb6957_c10/flp0/1611-1F  | GeBP | TF |
| F01_cb6957_c13/f6p0/2480-2F  | GeBP | TF |
| F01_cb6957_c4/f2p0/1635-2F   | GeBP | TF |
| F01_cb6957_c5/flp0/2730-2F   | GeBP | TF |
| F01_cb6957_c7/flp0/2483-2F   | GeBP | TF |
| F01_cb6957_c8/f3p0/2496-0F   | GeBP | TF |
| F01_cb6957_c9/flp0/1685-0F   | GeBP | TF |
| F01_cb6961_c13/fl3p1/2660-1F | C3H  | TF |
| F01_cb6961_c15/f3p2/2652-1F  | C3H  | TF |
| F01_cb6961_c7/flp0/2784-0F   | C3H  | TF |
| F01_cb6961_c8/flp0/2906-2F   | C3H  | TF |

---

---

|                             |          |    |
|-----------------------------|----------|----|
| F01_cb6968_c18/f2p0/2681-0F | GRAS     | TF |
| F01_cb6968_c19/f6p0/2660-1F | GRAS     | TF |
| F01_cb6968_c3/f2p0/2613-0F  | GRAS     | TF |
| F01_cb6968_c3/f2p0/2613-1F  | GRAS     | TF |
| F01_cb6968_c3/f2p0/2613-2F  | GRAS     | TF |
| F01_cb6968_c6/f1p0/2273-0F  | GRAS     | TF |
| F01_cb6968_c6/f1p0/2273-2F  | GRAS     | TF |
| F01_cb6968_c9/f1p0/2204-0F  | GRAS     | TF |
| F01_cb6968_c9/f1p0/2204-2F  | GRAS     | TF |
| F01_cb7008_c12/f1p0/3438-1R | GRAS     | TF |
| F01_cb7012_c0/f5p0/2486-0F  | ARID     | TR |
| F01_cb7012_c1/f1p0/2706-1F  | ARID     | TR |
| F01_cb7012_c2/f1p0/2476-0F  | ARID     | TR |
| F01_cb7012_c4/f1p0/2516-1F  | ARID     | TR |
| F01_cb7015_c1/f2p1/1388-2F  | Trihelix | TF |
| F01_cb7015_c11/f5p0/2542-1F | Trihelix | TF |
| F01_cb7015_c3/f1p0/2659-0F  | Trihelix | TF |
| F01_cb7015_c4/f1p0/4378-2F  | Trihelix | TF |
| F01_cb7015_c7/f1p0/1458-1F  | Trihelix | TF |
| F01_cb7015_c8/f1p0/1346-2F  | Trihelix | TF |
| F01_cb7024_c0/f2p0/2727-0F  | C2C2-Dof | TF |
| F01_cb7024_c1/f1p0/1496-1F  | C2C2-Dof | TF |
| F01_cb7027_c6/f1p0/5802-2F  | GRAS     | TF |
| F01_cb7034_c0/f3p1/2572-0F  | B3-ARF   | TF |
| F01_cb7035_c0/f2p0/2711-0R  | WRKY     | TF |
| F01_cb7035_c1/f1p0/4129-0R  | WRKY     | TF |

---

---

|                             |              |    |
|-----------------------------|--------------|----|
| F01_cb7036_c10/flp0/3316-0F | Others       | TR |
| F01_cb7036_c10/flp0/3316-1F | GARP-G2-like | TF |
| F01_cb7036_c11/flp0/3157-2F | GARP-ARR-B   | TF |
| F01_cb7036_c12/flp0/2716-0F | GARP-ARR-B   | TF |
| F01_cb7036_c15/flp0/1899-0F | GARP-ARR-B   | TF |
| F01_cb7036_c19/flp1/2831-0F | GARP-ARR-B   | TF |
| F01_cb7036_c3/f2p1/2778-0F  | Others       | TR |
| F01_cb7036_c3/f2p1/2778-2F  | GARP-G2-like | TF |
| F01_cb7036_c6/flp0/3409-0F  | GARP-ARR-B   | TF |
| F01_cb7036_c8/flp0/2651-1F  | GARP-ARR-B   | TF |
| F01_cb7036_c9/flp0/2936-2F  | Others       | TR |
| F01_cb705_c1/flp0/4658-1F   | C2H2         | TF |
| F01_cb705_c3/flp0/4558-0F   | Jumonji      | TR |
| F01_cb705_c3/flp0/4558-1F   | C2H2         | TF |
| F01_cb7101_c2/flp0/5603-2F  | C3H          | TF |
| F01_cb711_c0/flp0/4668-0F   | B3           | TF |
| F01_cb711_c0/flp0/4668-1F   | B3           | TF |
| F01_cb711_c0/flp0/4668-2F   | B3           | TF |
| F01_cb711_c1/flp0/2532-2F   | B3           | TF |
| F01_cb711_c2/flp1/4372-0F   | B3           | TF |
| F01_cb711_c2/flp1/4372-1F   | B3           | TF |
| F01_cb711_c3/flp0/4600-0F   | B3           | TF |
| F01_cb711_c3/flp0/4600-1F   | B3           | TF |
| F01_cb711_c4/flp0/2827-0F   | B3           | TF |
| F01_cb711_c4/flp0/2827-1F   | B3           | TF |
| F01_cb711_c4/flp0/2827-2F   | B3           | TF |

---

---

|                             |      |    |
|-----------------------------|------|----|
| F01_cb711_c6/flp0/1837-0F   | B3   | TF |
| F01_cb711_c6/flp0/1837-1F   | B3   | TF |
| F01_cb712_c7/flp0/2729-0F   | PHD  | TR |
| F01_cb7146_c0/f2p0/2641-2F  | Tify | TF |
| F01_cb7146_c1/flp0/2423-0F  | Tify | TF |
| F01_cb7146_c2/flp0/2035-1F  | Tify | TF |
| F01_cb7221_c13/flp1/2577-1F | C3H  | TF |
| F01_cb7221_c15/f2p1/2622-1F | C3H  | TF |
| F01_cb7221_c2/f3p2/2669-1F  | C3H  | TF |
| F01_cb7221_c3/f3p3/2658-2F  | C3H  | TF |
| F01_cb7221_c4/flp1/2600-0F  | C3H  | TF |
| F01_cb7221_c6/flp0/2447-0F  | C3H  | TF |
| F01_cb7227_c15/flp0/2366-1F | bHLH | TF |
| F01_cb7227_c21/f2p1/2381-1F | bHLH | TF |
| F01_cb7227_c4/f2p1/2393-2F  | bHLH | TF |
| F01_cb7227_c6/flp1/2555-1F  | bHLH | TF |
| F01_cb7227_c8/flp0/2289-0F  | bHLH | TF |
| F01_cb7227_c9/flp1/2479-0F  | bHLH | TF |
| F01_cb7250_c10/flp0/2442-1F | TUB  | TF |
| F01_cb7250_c10/flp0/2442-2F | TUB  | TF |
| F01_cb7250_c11/flp0/2344-1F | TUB  | TF |
| F01_cb7250_c14/flp0/1978-0F | TUB  | TF |
| F01_cb7250_c14/flp0/1978-2F | TUB  | TF |
| F01_cb7250_c15/flp0/1986-1F | TUB  | TF |
| F01_cb7250_c17/flp0/2045-1F | TUB  | TF |
| F01_cb7250_c5/flp0/2662-1F  | TUB  | TF |

---

---

|                             |              |    |
|-----------------------------|--------------|----|
| F01_cb7250_c7/f1p0/2322-2F  | TUB          | TF |
| F01_cb7250_c8/f1p0/2123-2F  | TUB          | TF |
| F01_cb7268_c1/f1p0/2659-1R  | bHLH         | TF |
| F01_cb7268_c2/f1p0/1955-2R  | bHLH         | TF |
| F01_cb7268_c3/f1p3/2423-2R  | bHLH         | TF |
| F01_cb7268_c4/f1p2/2443-2R  | bHLH         | TF |
| F01_cb7277_c0/f1p0/2657-2F  | GRAS         | TF |
| F01_cb7277_c1/f1p0/2066-0F  | GRAS         | TF |
| F01_cb7277_c1/f1p0/2066-2F  | GRAS         | TF |
| F01_cb7326_c0/f3p0/2586-1F  | Others       | TR |
| F01_cb7326_c2/f1p0/2642-0F  | GARP-G2-like | TF |
| F01_cb7326_c3/f1p0/2521-0F  | Others       | TR |
| F01_cb7326_c5/f1p0/2716-1F  | GARP-ARR-B   | TF |
| F01_cb7326_c6/f1p0/2307-1F  | Others       | TR |
| F01_cb7329_c10/f2p0/821-0F  | C2C2-LSD     | TF |
| F01_cb7329_c11/f15p0/837-1F | C2C2-LSD     | TF |
| F01_cb7329_c2/f1p0/2646-1F  | C2C2-LSD     | TF |
| F01_cb7329_c2/f1p0/2646-2F  | C2C2-LSD     | TF |
| F01_cb7329_c3/f1p0/2137-0F  | C2C2-LSD     | TF |
| F01_cb7329_c3/f1p0/2137-2F  | C2C2-LSD     | TF |
| F01_cb7329_c4/f1p0/1247-0F  | C2C2-LSD     | TF |
| F01_cb7329_c5/f1p0/1191-1F  | C2C2-LSD     | TF |
| F01_cb7329_c6/f1p0/950-0F   | C2C2-LSD     | TF |
| F01_cb7329_c7/f1p0/950-2F   | C2C2-LSD     | TF |
| F01_cb7329_c8/f2p0/896-0F   | C2C2-LSD     | TF |
| F01_cb7337_c1/f1p0/2641-0F  | AP2/ERF-ERF  | TF |

---

---

|                             |             |    |
|-----------------------------|-------------|----|
| F01_cb7337_c3/flp0/2569-0F  | AP2/ERF-ERF | TF |
| F01_cb7337_c4/flp0/2070-0F  | AP2/ERF-ERF | TF |
| F01_cb7337_c6/flp0/1841-1F  | AP2/ERF-ERF | TF |
| F01_cb7351_c0/f3p1/2134-0F  | bHLH        | TF |
| F01_cb7351_c1/flp0/2638-1F  | bHLH        | TF |
| F01_cb7377_c0/flp0/2631-0F  | GRAS        | TF |
| F01_cb7377_c10/flp0/2010-1F | GRAS        | TF |
| F01_cb7377_c12/flp0/2428-0F | GRAS        | TF |
| F01_cb7377_c2/flp0/2583-0F  | GRAS        | TF |
| F01_cb7377_c9/flp0/2341-2F  | GRAS        | TF |
| F01_cb7394_c0/f3p0/2628-2R  | MYB-related | TF |
| F01_cb7401_c0/flp0/2470-1F  | bZIP        | TF |
| F01_cb7401_c2/flp0/2349-1F  | bZIP        | TF |
| F01_cb7401_c5/flp0/2406-2F  | bZIP        | TF |
| F01_cb7401_c6/flp0/2499-1F  | bZIP        | TF |
| F01_cb7416_c10/flp0/1320-2F | C3H         | TF |
| F01_cb7416_c12/flp0/1304-1F | C3H         | TF |
| F01_cb7416_c3/flp0/2846-0F  | C3H         | TF |
| F01_cb7416_c4/flp1/3436-2F  | C3H         | TF |
| F01_cb7416_c8/flp0/2805-0F  | C3H         | TF |
| F01_cb7420_c0/f7p1/2477-1F  | bHLH        | TF |
| F01_cb7420_c1/f2p0/2574-0F  | bHLH        | TF |
| F01_cb7420_c13/flp0/2504-2F | bHLH        | TF |
| F01_cb7420_c3/flp0/2583-1F  | bHLH        | TF |
| F01_cb7420_c5/flp0/4429-0F  | bHLH        | TF |
| F01_cb7420_c9/flp0/3428-1F  | bHLH        | TF |

---



---

|                             |          |    |
|-----------------------------|----------|----|
| F01_cb7424_c0/f2p0/5795-1F  | SET      | TR |
| F01_cb7424_c4/f1p0/5945-1F  | SET      | TR |
| F01_cb7424_c5/f1p0/5425-0F  | SET      | TR |
| F01_cb7424_c6/f1p0/5597-0F  | SET      | TR |
| F01_cb7438_c0/f3p0/2229-1F  | C3H      | TF |
| F01_cb7438_c1/f1p0/2616-0F  | C3H      | TF |
| F01_cb7438_c3/f1p0/2563-0F  | C3H      | TF |
| F01_cb7438_c4/f1p0/2337-0F  | C3H      | TF |
| F01_cb7438_c6/f1p0/2534-0F  | C3H      | TF |
| F01_cb7464_c1/f2p0/2286-0F  | ARID     | TR |
| F01_cb7464_c2/f1p0/2609-1F  | ARID     | TR |
| F01_cb7464_c3/f1p0/2370-1F  | ARID     | TR |
| F01_cb7464_c5/f1p0/2090-1F  | ARID     | TR |
| F01_cb7464_c7/f7p0/1963-0F  | ARID     | TR |
| F01_cb7473_c15/f3p0/2177-2F | GNAT     | TR |
| F01_cb7473_c22/f1p1/2690-2F | GNAT     | TR |
| F01_cb7473_c24/f1p0/2303-0F | GNAT     | TR |
| F01_cb7473_c26/f1p1/2292-2F | GNAT     | TR |
| F01_cb7473_c27/f1p0/2196-0F | GNAT     | TR |
| F01_cb7477_c3/f1p0/2604-2F  | Trihelix | TF |
| F01_cb7477_c6/f5p0/2322-0F  | Trihelix | TF |
| F01_cb7477_c7/f6p0/2229-1F  | Trihelix | TF |
| F01_cb7491_c2/f1p0/1509-1F  | HB-other | TF |
| F01_cb7505_c0/f6p0/2552-0F  | bHLH     | TF |
| F01_cb7505_c1/f1p0/2589-2F  | bHLH     | TF |
| F01_cb7505_c2/f1p0/2591-1F  | bHLH     | TF |

---

---

|                             |                |    |
|-----------------------------|----------------|----|
| F01_cb7505_c3/f1p0/3471-0F  | bHLH           | TF |
| F01_cb7505_c5/f1p0/2003-2F  | bHLH           | TF |
| F01_cb7515_c12/f1p0/2851-1F | bHLH           | TF |
| F01_cb7515_c14/f3p1/2599-2F | bHLH           | TF |
| F01_cb7515_c2/f1p0/2717-2F  | bHLH           | TF |
| F01_cb7515_c3/f1p0/3235-0F  | bHLH           | TF |
| F01_cb7515_c8/f1p0/3092-2F  | bHLH           | TF |
| F01_cb7515_c9/f1p1/2473-1F  | bHLH           | TF |
| F01_cb7536_c0/f4p0/2573-0F  | SWI/SNF-BAF60b | TR |
| F01_cb7536_c1/f1p0/2495-1F  | SWI/SNF-BAF60b | TR |
| F01_cb7546_c0/f2p0/2538-0F  | FAR1           | TF |
| F01_cb7546_c1/f1p0/2593-1F  | FAR1           | TF |
| F01_cb7578_c0/f2p0/2517-2F  | FAR1           | TF |
| F01_cb7578_c5/f1p0/2401-0F  | FAR1           | TF |
| F01_cb7609_c1/f1p0/2494-0F  | FAR1           | TF |
| F01_cb7609_c2/f1p0/2180-0F  | FAR1           | TF |
| F01_cb760_c1/f1p0/4642-1F   | SNF2           | TR |
| F01_cb760_c10/f1p0/5334-0F  | SNF2           | TR |
| F01_cb760_c7/f1p0/5742-0F   | SNF2           | TR |
| F01_cb760_c7/f1p0/5742-1F   | SNF2           | TR |
| F01_cb7622_c2/f1p0/2568-1F  | Trihelix       | TF |
| F01_cb7622_c3/f1p0/2230-1F  | Trihelix       | TF |
| F01_cb7647_c0/f3p1/2342-2F  | FAR1           | TF |
| F01_cb7647_c2/f2p0/2361-2F  | FAR1           | TF |
| F01_cb7647_c3/f2p0/2256-1F  | FAR1           | TF |
| F01_cb7647_c4/f1p1/2573-1F  | FAR1           | TF |

---

---

|                             |             |    |
|-----------------------------|-------------|----|
| F01_cb7647_c7/f1p0/2390-2F  | FAR1        | TF |
| F01_cb7655_c0/f1p0/2566-2F  | MYB-related | TF |
| F01_cb7655_c1/f1p0/1912-0F  | MYB-related | TF |
| F01_cb765_c15/f1p0/3098-0F  | SNF2        | TR |
| F01_cb765_c2/f1p1/4647-0F   | PHD         | TR |
| F01_cb765_c3/f1p0/4678-2F   | SNF2        | TR |
| F01_cb765_c4/f1p0/4269-0F   | PHD         | TR |
| F01_cb765_c4/f1p0/4269-2F   | SNF2        | TR |
| F01_cb765_c6/f1p0/4514-2F   | PHD         | TR |
| F01_cb7661_c2/f1p1/2394-1F  | Jumonji     | TR |
| F01_cb7661_c3/f1p1/2127-2F  | Jumonji     | TR |
| F01_cb7671_c0/f4p0/2439-1F  | C2H2        | TF |
| F01_cb7671_c6/f1p0/2457-0F  | C2H2        | TF |
| F01_cb7671_c7/f1p0/2584-2F  | C2H2        | TF |
| F01_cb770_c0/f2p0/1445-0F   | GeBP        | TF |
| F01_cb770_c1/f2p0/2088-2F   | GeBP        | TF |
| F01_cb770_c2/f2p0/2154-1F   | GeBP        | TF |
| F01_cb770_c3/f1p1/4637-0F   | GeBP        | TF |
| F01_cb770_c4/f1p0/2173-2F   | GeBP        | TF |
| F01_cb770_c5/f1p0/2208-0F   | GeBP        | TF |
| F01_cb770_c7/f1p0/1765-1F   | GeBP        | TF |
| F01_cb770_c9/f1p0/1434-0F   | GeBP        | TF |
| F01_cb7727_c0/f1p0/2473-2F  | ARID        | TR |
| F01_cb7727_c1/f1p0/2654-2F  | ARID        | TR |
| F01_cb7744_c2/f1p0/3029-0F  | FAR1        | TF |
| F01_cb7744_c3/f13p1/2516-2F | FAR1        | TF |

---

---

|                             |             |    |
|-----------------------------|-------------|----|
| F01_cb7744_c4/f2p0/2472-0F  | FAR1        | TF |
| F01_cb7775_c0/f8p0/2245-1F  | MYB-related | TF |
| F01_cb7775_c1/flp0/2497-2F  | MYB-related | TF |
| F01_cb7775_c3/flp0/2253-0F  | MYB-related | TF |
| F01_cb7777_c1/flp0/2534-2F  | MADS-M-type | TF |
| F01_cb7783_c10/flp0/3451-0F | NAC         | TF |
| F01_cb7783_c10/flp0/3451-2F | NAC         | TF |
| F01_cb7783_c12/flp2/2182-0F | NAC         | TF |
| F01_cb7783_c14/flp1/2060-2F | NAC         | TF |
| F01_cb7783_c17/flp0/2403-0F | NAC         | TF |
| F01_cb7783_c18/flp0/2190-0F | NAC         | TF |
| F01_cb7783_c22/flp1/2195-2F | NAC         | TF |
| F01_cb7783_c26/flp0/2174-0F | NAC         | TF |
| F01_cb7783_c31/f7p3/2265-1F | NAC         | TF |
| F01_cb7783_c7/flp2/2533-0F  | NAC         | TF |
| F01_cb7794_c1/f3p0/2178-0F  | NAC         | TF |
| F01_cb7794_c12/flp0/1921-2F | NAC         | TF |
| F01_cb7794_c15/f3p0/2130-2F | NAC         | TF |
| F01_cb7794_c16/f5p0/2066-2F | NAC         | TF |
| F01_cb7794_c4/flp0/2532-2F  | NAC         | TF |
| F01_cb7794_c7/flp0/2104-1F  | NAC         | TF |
| F01_cb7794_c9/flp0/2090-0F  | NAC         | TF |
| F01_cb7802_c1/f5p2/1708-0F  | C3H         | TF |
| F01_cb7802_c10/flp0/1775-2F | C3H         | TF |
| F01_cb7802_c11/flp1/1784-0F | C3H         | TF |
| F01_cb7802_c15/flp0/1722-2F | C3H         | TF |

---

---

|                             |             |    |
|-----------------------------|-------------|----|
| F01_cb7802_c20/f1p0/1296-1F | C3H         | TF |
| F01_cb7802_c21/f1p0/1065-0F | C3H         | TF |
| F01_cb7802_c24/f6p1/1743-0F | C3H         | TF |
| F01_cb7802_c3/f4p0/2215-2F  | C3H         | TF |
| F01_cb7802_c6/f1p0/2531-0F  | C3H         | TF |
| F01_cb7802_c8/f1p0/1992-0F  | C3H         | TF |
| F01_cb7802_c9/f1p0/1789-1F  | C3H         | TF |
| F01_cb7826_c1/f2p0/1694-1F  | NAC         | TF |
| F01_cb7826_c2/f2p0/2579-2F  | NAC         | TF |
| F01_cb7826_c3/f1p0/1930-1F  | NAC         | TF |
| F01_cb7826_c4/f1p0/1812-2F  | NAC         | TF |
| F01_cb7826_c5/f1p0/1774-1F  | NAC         | TF |
| F01_cb7826_c6/f1p0/1693-2F  | NAC         | TF |
| F01_cb7839_c0/f1p0/2522-2F  | Trihelix    | TF |
| F01_cb7839_c1/f1p0/2164-1F  | Trihelix    | TF |
| F01_cb7839_c2/f1p0/1709-1F  | Trihelix    | TF |
| F01_cb7839_c3/f1p0/1582-0F  | Trihelix    | TF |
| F01_cb7839_c4/f1p0/1475-0F  | Trihelix    | TF |
| F01_cb7845_c1/f1p0/2303-0F  | HB-other    | TF |
| F01_cb7845_c2/f1p0/2265-1F  | HB-BELL     | TF |
| F01_cb7845_c4/f1p0/2414-2F  | HB-BELL     | TF |
| F01_cb7851_c0/f3p0/2191-1F  | MYB-related | TF |
| F01_cb7851_c1/f1p0/2518-1F  | MYB-related | TF |
| F01_cb7851_c2/f1p0/2210-2F  | MYB-related | TF |
| F01_cb7851_c3/f1p0/2493-1F  | MYB-related | TF |
| F01_cb7851_c4/f1p0/2193-0F  | MYB-related | TF |

---

---

|                              |             |    |
|------------------------------|-------------|----|
| F01_cb7851_c6/f1p0/2187-2F   | MYB-related | TF |
| F01_cb7862_c0/f2p0/2198-2F   | FAR1        | TF |
| F01_cb7892_c1/f1p0/2464-0F   | bHLH        | TF |
| F01_cb7892_c2/f1p0/2437-1F   | bHLH        | TF |
| F01_cb7900_c1/f1p0/2613-2F   | NAC         | TF |
| F01_cb7900_c2/f1p0/1125-1F   | NAC         | TF |
| F01_cb7919_c0/f5p0/2485-0F   | CPP         | TF |
| F01_cb7919_c2/f1p0/2497-1F   | CPP         | TF |
| F01_cb7921_c0/f4p0/2286-0F   | MYB         | TF |
| F01_cb7921_c1/f1p0/2500-1F   | MYB         | TF |
| F01_cb7921_c4/f1p1/2319-0F   | MYB         | TF |
| F01_cb7965_c0/f10p0/2364-0F  | IWS1        | TR |
| F01_cb7965_c12/f3p0/2492-0F  | IWS1        | TR |
| F01_cb7965_c3/f1p0/3001-2F   | IWS1        | TR |
| F01_cb7965_c4/f1p0/2512-0F   | IWS1        | TR |
| F01_cb7992_c0/f3p0/1018-1F   | bHLH        | TF |
| F01_cb7994_c10/f1p0/1797-1F  | HB-other    | TF |
| F01_cb7994_c12/f21p4/2000-2F | HB-KNOX     | TF |
| F01_cb7994_c15/f2p2/1880-1F  | HB-KNOX     | TF |
| F01_cb7994_c4/f1p1/2484-2F   | HB-KNOX     | TF |
| F01_cb8008_c0/f3p0/1481-1F   | B3          | TF |
| F01_cb8008_c3/f1p0/2803-2F   | B3          | TF |
| F01_cb8008_c4/f1p0/1536-1F   | B3          | TF |
| F01_cb8012_c2/f1p0/2209-0F   | AP2/ERF-AP2 | TF |
| F01_cb8012_c3/f1p0/2011-2F   | AP2/ERF-AP2 | TF |
| F01_cb8012_c4/f1p0/2147-0F   | AP2/ERF-ERF | TF |

---

---

|                             |              |    |
|-----------------------------|--------------|----|
| F01_cb8012_c4/f1p0/2147-2F  | AP2/ERF-ERF  | TF |
| F01_cb801_c1/f1p0/3812-1F   | SWI/SNF-SWI3 | TR |
| F01_cb801_c2/f1p0/4334-2F   | SWI/SNF-SWI3 | TR |
| F01_cb801_c5/f1p0/4078-2F   | SWI/SNF-SWI3 | TR |
| F01_cb8021_c4/f2p0/2179-1F  | TUB          | TF |
| F01_cb8021_c5/f1p0/2473-2F  | TUB          | TF |
| F01_cb8021_c6/f1p1/2110-0F  | TUB          | TF |
| F01_cb8021_c6/f1p1/2110-1F  | TUB          | TF |
| F01_cb8039_c0/f1p0/2478-0F  | HSF          | TF |
| F01_cb8039_c1/f1p0/2579-1F  | HSF          | TF |
| F01_cb8039_c1/f1p0/2579-2F  | HSF          | TF |
| F01_cb8041_c10/f1p2/2193-1F | NAC          | TF |
| F01_cb8041_c12/f1p0/2361-0F | NAC          | TF |
| F01_cb8041_c13/f1p0/2390-1F | NAC          | TF |
| F01_cb8041_c14/f1p0/2381-0F | NAC          | TF |
| F01_cb8041_c15/f1p1/2453-2F | NAC          | TF |
| F01_cb8041_c16/f1p0/2433-1F | NAC          | TF |
| F01_cb8041_c17/f1p0/2556-2F | NAC          | TF |
| F01_cb8041_c22/f1p0/2444-1F | NAC          | TF |
| F01_cb8041_c22/f1p0/2444-2F | NAC          | TF |
| F01_cb8041_c25/f1p0/2398-1F | NAC          | TF |
| F01_cb8041_c27/f1p2/2321-1F | NAC          | TF |
| F01_cb8041_c6/f1p0/2474-0F  | NAC          | TF |
| F01_cb8044_c0/f3p0/2437-2F  | MYB-related  | TF |
| F01_cb8044_c1/f1p0/2465-1F  | MYB-related  | TF |
| F01_cb8090_c0/f3p0/2304-1F  | Others       | TR |

---

---

|                              |              |    |
|------------------------------|--------------|----|
| F01_cb8090_c2/f2p0/2462-2F   | Others       | TR |
| F01_cb8103_c10/f1p0/2354-2F  | HMG          | TR |
| F01_cb8103_c12/f1p2/2304-1F  | HMG          | TR |
| F01_cb8103_c13/f1p0/2001-2F  | HMG          | TR |
| F01_cb8103_c18/f31p2/2112-1F | HMG          | TR |
| F01_cb8103_c5/f1p2/2342-0F   | HMG          | TR |
| F01_cb8113_c0/f5p1/2291-1F   | HMG          | TR |
| F01_cb8113_c2/f1p1/2633-0F   | HMG          | TR |
| F01_cb8113_c4/f1p1/3608-1F   | HMG          | TR |
| F01_cb8113_c5/f1p1/2305-1F   | HMG          | TR |
| F01_cb8113_c6/f1p0/2348-0F   | HMG          | TR |
| F01_cb8133_c11/f1p0/2365-1F  | GRAS         | TF |
| F01_cb8133_c12/f1p2/2384-1F  | GRAS         | TF |
| F01_cb8133_c15/f1p1/2322-0F  | GRAS         | TF |
| F01_cb8133_c22/f4p2/2309-2F  | GRAS         | TF |
| F01_cb8133_c24/f2p1/2289-2F  | GRAS         | TF |
| F01_cb8133_c4/f1p1/2448-2F   | GRAS         | TF |
| F01_cb8133_c6/f1p1/2183-2F   | GRAS         | TF |
| F01_cb8148_c11/f6p0/2039-1F  | bHLH         | TF |
| F01_cb8148_c2/f2p0/2226-1F   | bHLH         | TF |
| F01_cb8148_c3/f2p0/1759-2F   | bHLH         | TF |
| F01_cb8148_c7/f1p0/2147-1F   | bHLH         | TF |
| F01_cb8148_c8/f1p0/1885-2F   | bHLH         | TF |
| F01_cb8156_c0/f4p0/1790-0F   | GARP-G2-like | TF |
| F01_cb8156_c2/f1p0/2444-1F   | GARP-G2-like | TF |
| F01_cb8156_c3/f1p1/1819-0F   | GARP-G2-like | TF |

---



---

|                             |              |    |
|-----------------------------|--------------|----|
| F01_cb8156_c4/f1p0/2088-1F  | GARP-G2-like | TF |
| F01_cb8156_c6/f1p0/1778-2F  | GARP-G2-like | TF |
| F01_cb8156_c8/f1p0/1578-1F  | GARP-G2-like | TF |
| F01_cb8158_c0/f2p0/2240-2F  | NF-YB        | TF |
| F01_cb816_c10/f1p0/3174-0F  | IWS1         | TR |
| F01_cb816_c12/f1p0/3158-0F  | IWS1         | TR |
| F01_cb816_c16/f1p0/2521-0F  | IWS1         | TR |
| F01_cb816_c19/f7p1/2220-1F  | IWS1         | TR |
| F01_cb816_c20/f5p2/2306-2F  | IWS1         | TR |
| F01_cb816_c3/f3p0/2302-0F   | IWS1         | TR |
| F01_cb816_c7/f1p0/2363-2F   | IWS1         | TR |
| F01_cb8176_c0/f1p0/2434-2F  | TCP          | TF |
| F01_cb8176_c1/f1p0/1853-1F  | TCP          | TF |
| F01_cb8176_c2/f1p1/1576-2F  | TCP          | TF |
| F01_cb8182_c1/f1p0/2323-2F  | FAR1         | TF |
| F01_cb8192_c11/f6p0/2345-1F | C3H          | TF |
| F01_cb8192_c3/f1p0/2430-0F  | C3H          | TF |
| F01_cb8192_c3/f1p0/2430-1F  | C3H          | TF |
| F01_cb8192_c4/f1p0/2486-0F  | C3H          | TF |
| F01_cb8192_c4/f1p0/2486-2F  | C3H          | TF |
| F01_cb8208_c0/f1p0/2428-2F  | bHLH         | TF |
| F01_cb8208_c1/f1p0/1991-1F  | bHLH         | TF |
| F01_cb8215_c8/f1p0/2308-0R  | TAZ          | TR |
| F01_cb8229_c1/f1p0/2156-0F  | HB-HD-ZIP    | TF |
| F01_cb8229_c2/f1p0/1882-1F  | HB-HD-ZIP    | TF |
| F01_cb8229_c3/f1p0/1714-1F  | HB-HD-ZIP    | TF |

---

---

|                             |              |    |
|-----------------------------|--------------|----|
| F01_cb8230_c1/f1p0/2424-0F  | NF-YC        | TF |
| F01_cb8230_c3/f1p0/2044-0F  | NF-YC        | TF |
| F01_cb8234_c5/f4p2/3010-0F  | C2H2         | TF |
| F01_cb8257_c0/f1p0/2419-2F  | C2H2         | TF |
| F01_cb8257_c1/f1p0/2452-2F  | C2H2         | TF |
| F01_cb8258_c12/f1p0/2154-0F | C2C2-Dof     | TF |
| F01_cb8258_c13/f1p0/2409-0F | C2C2-Dof     | TF |
| F01_cb8258_c18/f1p0/2040-0F | C2C2-Dof     | TF |
| F01_cb8258_c6/f1p0/2414-1F  | C2C2-Dof     | TF |
| F01_cb8258_c6/f1p0/2414-2F  | C2C2-Dof     | TF |
| F01_cb8258_c8/f1p0/2039-2F  | C2C2-Dof     | TF |
| F01_cb8258_c9/f1p0/2131-0F  | C2C2-Dof     | TF |
| F01_cb8268_c0/f5p2/2432-0F  | GARP-ARR-B   | TF |
| F01_cb8268_c2/f3p2/2423-0F  | GARP-ARR-B   | TF |
| F01_cb8268_c4/f1p2/2376-0F  | GARP-ARR-B   | TF |
| F01_cb8277_c2/f1p0/3699-1F  | GARP-G2-like | TF |
| F01_cb8277_c2/f1p0/3699-2F  | Others       | TR |
| F01_cb8287_c2/f1p0/2422-0F  | mTERF        | TR |
| F01_cb8295_c1/f6p0/1642-1F  | C2H2         | TF |
| F01_cb8295_c4/f1p0/2139-0F  | C2H2         | TF |
| F01_cb8295_c5/f5p0/2401-2F  | C2H2         | TF |
| F01_cb8301_c0/f1p0/2363-0F  | mTERF        | TR |
| F01_cb8301_c2/f1p0/2755-1F  | mTERF        | TR |
| F01_cb8301_c3/f1p0/2474-2F  | mTERF        | TR |
| F01_cb8301_c4/f1p0/1209-1F  | mTERF        | TR |
| F01_cb8347_c1/f2p0/2190-0F  | mTERF        | TR |

---

---

|                             |              |    |
|-----------------------------|--------------|----|
| F01_cb8391_c2/flp0/1888-2F  | GARP-G2-like | TF |
| F01_cb8391_c3/flp0/1610-2F  | GARP-G2-like | TF |
| F01_cb8391_c4/flp0/1467-1F  | GARP-G2-like | TF |
| F01_cb8391_c5/flp0/1456-0F  | GARP-G2-like | TF |
| F01_cb8391_c7/flp0/1432-2F  | GARP-G2-like | TF |
| F01_cb8399_c0/flp1/2379-1F  | AP2/ERF-ERF  | TF |
| F01_cb8399_c1/flp0/1901-1F  | AP2/ERF-ERF  | TF |
| F01_cb8399_c4/flp0/1181-2F  | AP2/ERF-ERF  | TF |
| F01_cb8400_c0/f6p1/1868-1F  | C3H          | TF |
| F01_cb8400_c1/flp1/1838-1F  | C3H          | TF |
| F01_cb8400_c4/f2p0/1858-2F  | C3H          | TF |
| F01_cb8400_c5/flp0/1347-2F  | C3H          | TF |
| F01_cb8424_c0/flp0/2374-1F  | MYB-related  | TF |
| F01_cb8424_c1/flp0/2377-0F  | MYB-related  | TF |
| F01_cb8433_c12/flp0/2395-1F | FAR1         | TF |
| F01_cb8433_c20/flp0/1045-1F | FAR1         | TF |
| F01_cb8433_c22/flp0/5526-0F | FAR1         | TF |
| F01_cb8433_c23/f3p0/1059-1F | FAR1         | TF |
| F01_cb8447_c10/flp0/2414-2F | MYB-related  | TF |
| F01_cb8447_c13/f3p1/2336-1F | MYB-related  | TF |
| F01_cb8447_c3/f2p1/2371-1F  | MYB-related  | TF |
| F01_cb8447_c6/flp0/2232-2F  | MYB-related  | TF |
| F01_cb8458_c1/flp0/3115-1F  | bZIP         | TF |
| F01_cb8463_c0/flp0/2363-0F  | AP2/ERF-ERF  | TF |
| F01_cb8463_c0/flp0/2363-2F  | AP2/ERF-ERF  | TF |
| F01_cb8463_c1/flp0/2256-2F  | AP2/ERF-AP2  | TF |

---

---

|                             |             |    |
|-----------------------------|-------------|----|
| F01_cb8469_c0/f4p0/2201-1F  | MYB-related | TF |
| F01_cb8469_c2/f1p0/2360-2F  | MYB-related | TF |
| F01_cb8469_c4/f1p0/3531-2F  | MYB-related | TF |
| F01_cb8469_c6/f1p0/3442-1F  | MYB-related | TF |
| F01_cb8469_c8/f1p0/2270-2F  | MYB-related | TF |
| F01_cb8478_c10/f2p0/3099-1F | FAR1        | TF |
| F01_cb8478_c13/f2p0/3348-2F | FAR1        | TF |
| F01_cb8478_c22/f1p0/3564-0F | FAR1        | TF |
| F01_cb8478_c24/f1p0/3383-0F | FAR1        | TF |
| F01_cb8478_c24/f1p0/3383-2F | FAR1        | TF |
| F01_cb8478_c26/f1p0/3535-0F | FAR1        | TF |
| F01_cb8478_c32/f1p0/3207-0F | FAR1        | TF |
| F01_cb8478_c34/f1p0/3403-2F | FAR1        | TF |
| F01_cb8478_c37/f1p0/3192-0F | FAR1        | TF |
| F01_cb8478_c38/f1p0/3197-0F | FAR1        | TF |
| F01_cb8478_c39/f1p0/3267-0F | FAR1        | TF |
| F01_cb8478_c7/f2p0/3290-1F  | FAR1        | TF |
| F01_cb8478_c9/f2p1/3524-2F  | FAR1        | TF |
| F01_cb8516_c0/f3p1/2129-2F  | TCP         | TF |
| F01_cb8516_c2/f1p0/2182-0F  | TCP         | TF |
| F01_cb8516_c3/f1p0/2479-0F  | TCP         | TF |
| F01_cb8526_c0/f4p0/2241-0F  | HSF         | TF |
| F01_cb8526_c1/f2p0/2143-2F  | HSF         | TF |
| F01_cb8526_c3/f1p0/2285-2F  | HSF         | TF |
| F01_cb8526_c6/f1p0/2343-1F  | HSF         | TF |
| F01_cb8526_c7/f1p0/2227-2F  | HSF         | TF |

---

---

|                                 |                |    |
|---------------------------------|----------------|----|
| F01_cb8526_c8/f1p0/1787-1F      | HSF            | TF |
| F01_cb854_c0/f1p0/4601-2F       | FAR1           | TF |
| F01_cb854_c1/f1p1/2719-0F       | FAR1           | TF |
| F01_cb854_c3/f1p1/2814-1F       | FAR1           | TF |
| F01_cb854_c5/f1p0/2064-1F       | FAR1           | TF |
| F01_cb854_c6/f1p1/2657-0F       | FAR1           | TF |
| F01_cb8553_c18/f12p1/2234-0F    | GRAS           | TF |
| F01_cb8553_c19/f11p0/2278-1F    | GRAS           | TF |
| F01_cb8553_c3/f8p0/2196-2F      | GRAS           | TF |
| F01_cb8553_c4/f4p1/2240-2F      | GRAS           | TF |
| F01_cb8553_c8/f1p0/2286-2F      | GRAS           | TF |
| F01_cb8553_c9/f1p0/2435-1F      | GRAS           | TF |
| F01_cb8564_c10206/f1p0/3499-1F  | WRKY           | TF |
| F01_cb8564_c1027/f1p0/1955-0F   | C2H2           | TF |
| F01_cb8564_c1028/f2p0/1918-1F   | C2H2           | TF |
| F01_cb8564_c103295/f1p0/2626-2F | HB-BELL        | TF |
| F01_cb8564_c10426/f1p0/3142-0F  | GRAS           | TF |
| F01_cb8564_c10426/f1p0/3142-2F  | GRAS           | TF |
| F01_cb8564_c106647/f6p1/2113-2F | WRKY           | TF |
| F01_cb8564_c10668/f1p0/2523-0F  | bHLH           | TF |
| F01_cb8564_c106852/f5p2/2630-2F | GRAS           | TF |
| F01_cb8564_c106911/f7p3/3690-0F | SBP            | TF |
| F01_cb8564_c106917/f6p1/3331-2F | SWI/SNF-BAF60b | TR |
| F01_cb8564_c107051/f2p1/3797-1F | SBP            | TF |
| F01_cb8564_c107237/f5p1/2872-0F | RWP-RK         | TF |
| F01_cb8564_c107332/f9p1/3308-1F | SWI/SNF-BAF60b | TR |

---

---

|                                 |           |    |
|---------------------------------|-----------|----|
| F01_cb8564_c1076/f1p0/2896-0F   | HB-BELL   | TF |
| F01_cb8564_c107632/f8p2/2201-1F | C2H2      | TF |
| F01_cb8564_c107657/f8p0/3003-0F | GRAS      | TF |
| F01_cb8564_c107870/f4p1/2211-2F | Trihelix  | TF |
| F01_cb8564_c108232/f2p5/4746-0F | Others    | TR |
| F01_cb8564_c1086/f1p0/3040-1F   | C3H       | TF |
| F01_cb8564_c1087/f3p0/2638-0F   | C3H       | TF |
| F01_cb8564_c109507/f4p6/2607-1F | NAC       | TF |
| F01_cb8564_c109928/f2p1/3116-1F | B3-ARF    | TF |
| F01_cb8564_c109971/f3p4/2739-2F | HB-HD-ZIP | TF |
| F01_cb8564_c1100/f2p1/2055-1F   | TRAF      | TR |
| F01_cb8564_c110015/f3p0/4441-0F | PHD       | TR |
| F01_cb8564_c110015/f3p0/4441-1F | SET       | TR |
| F01_cb8564_c110086/f2p0/3836-2F | Others    | TR |
| F01_cb8564_c1101/f1p1/1925-0F   | TRAF      | TR |
| F01_cb8564_c1102/f1p0/2215-1F   | TRAF      | TR |
| F01_cb8564_c11055/f1p2/1904-0F  | HB-HD-ZIP | TF |
| F01_cb8564_c110637/f1p2/2491-0F | FAR1      | TF |
| F01_cb8564_c111594/f1p0/3002-0F | TAZ       | TR |
| F01_cb8564_c11215/f1p0/3486-2F  | WRKY      | TF |
| F01_cb8564_c112473/f1p0/3272-0F | WRKY      | TF |
| F01_cb8564_c112632/f1p0/2851-1R | MADS-MIKC | TF |
| F01_cb8564_c112707/f1p0/2546-0F | WRKY      | TF |
| F01_cb8564_c112719/f1p0/2721-2F | RWP-RK    | TF |
| F01_cb8564_c11301/f2p0/3190-0F  | WRKY      | TF |
| F01_cb8564_c113200/f1p0/2705-2F | FAR1      | TF |

---

---

|                                 |             |    |
|---------------------------------|-------------|----|
| F01_cb8564_c113323/f1p0/1928-1F | mTERF       | TR |
| F01_cb8564_c113379/f1p1/2337-2F | WRKY        | TF |
| F01_cb8564_c113484/f1p0/2649-2F | FAR1        | TF |
| F01_cb8564_c113749/f1p1/2029-2F | AP2/ERF-ERF | TF |
| F01_cb8564_c113907/f1p2/1941-2F | AP2/ERF-ERF | TF |
| F01_cb8564_c113961/f1p0/3218-1F | TAZ         | TR |
| F01_cb8564_c114548/f1p0/2001-2F | bHLH        | TF |
| F01_cb8564_c115092/f1p0/2887-0R | TUB         | TF |
| F01_cb8564_c115579/f1p0/2540-1F | bHLH        | TF |
| F01_cb8564_c115771/f1p0/2894-0F | NAC         | TF |
| F01_cb8564_c115945/f1p0/2388-0F | TRAF        | TR |
| F01_cb8564_c115983/f1p0/2126-2F | RWP-RK      | TF |
| F01_cb8564_c11628/f1p0/3577-2F  | Jumonji     | TR |
| F01_cb8564_c116305/f1p0/2020-2F | C3H         | TF |
| F01_cb8564_c116852/f1p0/2560-1F | C2C2-GATA   | TF |
| F01_cb8564_c117515/f1p0/2510-2F | RWP-RK      | TF |
| F01_cb8564_c117538/f1p1/2205-2F | WRKY        | TF |
| F01_cb8564_c117852/f1p0/1926-2F | Others      | TR |
| F01_cb8564_c118234/f1p0/2657-0F | AP2/ERF-ERF | TF |
| F01_cb8564_c118234/f1p0/2657-1F | RWP-RK      | TF |
| F01_cb8564_c11824/f2p0/2433-2F  | mTERF       | TR |
| F01_cb8564_c119112/f1p0/3859-2F | Others      | TR |
| F01_cb8564_c119459/f1p0/2673-1F | TUB         | TF |
| F01_cb8564_c119489/f1p2/2132-2F | HB-HD-ZIP   | TF |
| F01_cb8564_c11955/f1p0/3106-0F  | B3-ARF      | TF |
| F01_cb8564_c119629/f1p3/2129-0F | AP2/ERF-ERF | TF |

---

---

|                                 |             |    |
|---------------------------------|-------------|----|
| F01_cb8564_c119729/f1p1/1931-0F | AUX/IAA     | TR |
| F01_cb8564_c119935/f1p0/3487-0F | TAZ         | TR |
| F01_cb8564_c120024/f1p0/2514-1F | TRAF        | TR |
| F01_cb8564_c120089/f1p0/3325-2R | Others      | TR |
| F01_cb8564_c120246/f1p1/1940-1F | AUX/IAA     | TR |
| F01_cb8564_c120610/f1p0/2686-0F | SNF2        | TR |
| F01_cb8564_c120610/f1p0/2686-1F | SNF2        | TR |
| F01_cb8564_c121017/f1p0/4917-0F | bHLH        | TF |
| F01_cb8564_c121214/f1p0/2308-0F | RWP-RK      | TF |
| F01_cb8564_c121422/f1p3/2066-1F | HB-HD-ZIP   | TF |
| F01_cb8564_c121579/f1p0/2710-0F | GRAS        | TF |
| F01_cb8564_c121579/f1p0/2710-2F | GRAS        | TF |
| F01_cb8564_c122355/f1p0/2994-0F | RWP-RK      | TF |
| F01_cb8564_c122499/f4p1/2386-0F | WRKY        | TF |
| F01_cb8564_c122690/f2p1/2644-2F | RWP-RK      | TF |
| F01_cb8564_c123008/f1p0/2517-2F | FAR1        | TF |
| F01_cb8564_c12334/f3p1/4316-2F  | mTERF       | TR |
| F01_cb8564_c123469/f1p0/3334-1F | NAC         | TF |
| F01_cb8564_c123817/f1p0/2095-2F | C3H         | TF |
| F01_cb8564_c123973/f1p0/3276-2F | FAR1        | TF |
| F01_cb8564_c124012/f1p0/2451-2F | WRKY        | TF |
| F01_cb8564_c12433/f1p0/3729-0F  | HB-HD-ZIP   | TF |
| F01_cb8564_c124519/f1p0/2115-1F | AP2/ERF-ERF | TF |
| F01_cb8564_c124567/f1p0/2268-2F | Trihelix    | TF |
| F01_cb8564_c124659/f1p0/2129-2F | AP2/ERF-ERF | TF |
| F01_cb8564_c124689/f1p0/2316-1F | Others      | TR |

---



---

|                                 |              |    |
|---------------------------------|--------------|----|
| F01_cb8564_c124703/f1p1/2204-0F | AUX/IAA      | TR |
| F01_cb8564_c124703/f1p1/2204-1F | AUX/IAA      | TR |
| F01_cb8564_c124955/f1p0/2372-0F | GRAS         | TF |
| F01_cb8564_c124955/f1p0/2372-1F | GRAS         | TF |
| F01_cb8564_c124955/f1p0/2372-2F | GRAS         | TF |
| F01_cb8564_c125111/f1p0/2638-0F | SNF2         | TR |
| F01_cb8564_c125111/f1p0/2638-1F | SNF2         | TR |
| F01_cb8564_c125116/f2p1/2358-1F | GRAS         | TF |
| F01_cb8564_c12556/f1p0/4524-0F  | MYB          | TF |
| F01_cb8564_c1256/f1p0/2155-0R   | TUB          | TF |
| F01_cb8564_c1257/f1p0/4087-0R   | TUB          | TF |
| F01_cb8564_c125850/f1p1/2243-2F | mTERF        | TR |
| F01_cb8564_c126419/f1p0/1910-2F | Trihelix     | TF |
| F01_cb8564_c126457/f1p0/4429-0F | PHD          | TR |
| F01_cb8564_c126498/f1p0/2408-1F | WRKY         | TF |
| F01_cb8564_c12677/f2p1/3263-2F  | B3-ARF       | TF |
| F01_cb8564_c126796/f1p0/2168-1F | C2C2-CO-like | TF |
| F01_cb8564_c127138/f1p0/4403-1F | PHD          | TR |
| F01_cb8564_c127138/f1p0/4403-2F | SET          | TR |
| F01_cb8564_c127809/f1p0/2005-1F | AP2/ERF-ERF  | TF |
| F01_cb8564_c127882/f1p0/2154-0F | Others       | TR |
| F01_cb8564_c128164/f1p0/2243-0F | AP2/ERF-ERF  | TF |
| F01_cb8564_c128215/f1p0/2462-2F | FAR1         | TF |
| F01_cb8564_c128322/f1p0/2488-1F | Trihelix     | TF |
| F01_cb8564_c128705/f1p0/2363-0F | Others       | TR |
| F01_cb8564_c128749/f1p0/2577-2F | STAT         | TF |

---

---

|                                 |           |    |
|---------------------------------|-----------|----|
| F01_cb8564_c128999/f1p2/2626-2F | AUX/IAA   | TR |
| F01_cb8564_c129342/f1p0/2752-0F | STAT      | TF |
| F01_cb8564_c1298/f14p5/2084-1F  | WRKY      | TF |
| F01_cb8564_c129967/f2p0/4204-2F | PHD       | TR |
| F01_cb8564_c13000/f2p0/4359-0F  | SBP       | TF |
| F01_cb8564_c130327/f1p7/1940-2F | HB-HD-ZIP | TF |
| F01_cb8564_c130334/f1p0/3467-1F | bHLH      | TF |
| F01_cb8564_c13150/f4p0/2764-0F  | GRAS      | TF |
| F01_cb8564_c13280/f3p0/4088-0F  | PHD       | TR |
| F01_cb8564_c134008/f1p6/2127-1F | HB-HD-ZIP | TF |
| F01_cb8564_c13451/f1p2/3193-1F  | GRAS      | TF |
| F01_cb8564_c137927/f1p7/1905-1F | HB-HD-ZIP | TF |
| F01_cb8564_c139145/f1p8/2101-0F | HB-HD-ZIP | TF |
| F01_cb8564_c14001/f1p0/3475-2F  | GRAS      | TF |
| F01_cb8564_c14024/f1p0/4640-0F  | GRAS      | TF |
| F01_cb8564_c14024/f1p0/4640-2F  | GRAS      | TF |
| F01_cb8564_c14103/f1p0/2351-0F  | WRKY      | TF |
| F01_cb8564_c141478/f2p1/3738-2F | GRAS      | TF |
| F01_cb8564_c14157/f1p1/4319-2F  | mTERF     | TR |
| F01_cb8564_c14216/f1p0/3375-2F  | B3-ARF    | TF |
| F01_cb8564_c14355/f1p0/3726-0F  | HB-PHD    | TF |
| F01_cb8564_c14361/f1p0/2209-2F  | TRAF      | TR |
| F01_cb8564_c145324/f8p2/2614-0F | SNF2      | TR |
| F01_cb8564_c145331/f4p1/2049-0F | Trihelix  | TF |
| F01_cb8564_c145342/f2p0/2771-0F | bHLH      | TF |
| F01_cb8564_c145452/f2p1/2632-1F | GRAS      | TF |

---

---

|                                  |              |    |
|----------------------------------|--------------|----|
| F01_cb8564_c14546/f1p5/3300-2F   | HB-BELL      | TF |
| F01_cb8564_c145803/f3p4/2658-0F  | HB-HD-ZIP    | TF |
| F01_cb8564_c145851/f5p1/2705-2F  | STAT         | TF |
| F01_cb8564_c145906/f6p0/3616-1F  | HB-PHD       | TF |
| F01_cb8564_c145947/f8p2/2415-0F  | C2C2-CO-like | TF |
| F01_cb8564_c146107/f6p1/2403-0F  | C2C2-GATA    | TF |
| F01_cb8564_c146223/f12p1/2980-0F | LUG          | TR |
| F01_cb8564_c146257/f6p6/2574-0F  | HB-BELL      | TF |
| F01_cb8564_c146313/f4p3/3697-0F  | SBP          | TF |
| F01_cb8564_c146386/f13p5/2801-0F | GRAS         | TF |
| F01_cb8564_c146488/f2p1/2737-2F  | HB-other     | TF |
| F01_cb8564_c146864/f4p3/2617-0F  | GRAS         | TF |
| F01_cb8564_c147135/f5p2/2714-0F  | TUB          | TF |
| F01_cb8564_c147929/f1p0/2042-2F  | C2C2-CO-like | TF |
| F01_cb8564_c148927/f5p0/2405-1F  | C2C2-GATA    | TF |
| F01_cb8564_c149594/f1p1/2449-2F  | C2C2-CO-like | TF |
| F01_cb8564_c15031/f1p2/3179-2F   | B3-ARF       | TF |
| F01_cb8564_c15033/f1p1/3280-2F   | MADS-M-type  | TF |
| F01_cb8564_c150346/f1p2/2814-1F  | GRAS         | TF |
| F01_cb8564_c15292/f1p0/2336-2F   | SBP          | TF |
| F01_cb8564_c153372/f2p2/3657-2F  | SNF2         | TR |
| F01_cb8564_c15372/f1p0/3532-0F   | SNF2         | TR |
| F01_cb8564_c15372/f1p0/3532-1F   | SNF2         | TR |
| F01_cb8564_c15372/f1p0/3532-2F   | SNF2         | TR |
| F01_cb8564_c155769/f1p3/2649-2F  | HB-BELL      | TF |
| F01_cb8564_c158006/f2p1/3461-0F  | AUX/IAA      | TR |

---

---

|                                 |              |    |
|---------------------------------|--------------|----|
| F01_cb8564_c158006/f2p1/3461-2F | B3-ARF       | TF |
| F01_cb8564_c158498/f1p2/2482-1F | FAR1         | TF |
| F01_cb8564_c159074/f1p3/2275-0F | Trihelix     | TF |
| F01_cb8564_c159074/f1p3/2275-1F | Trihelix     | TF |
| F01_cb8564_c162316/f1p1/2224-0F | WRKY         | TF |
| F01_cb8564_c162316/f1p1/2224-2F | WRKY         | TF |
| F01_cb8564_c16410/f1p0/2002-2F  | TRAF         | TR |
| F01_cb8564_c16421/f1p0/2249-2F  | mTERF        | TR |
| F01_cb8564_c16498/f2p2/2818-1F  | HB-HD-ZIP    | TF |
| F01_cb8564_c16669/f1p0/2894-1F  | mTERF        | TR |
| F01_cb8564_c166913/f2p2/2105-0F | Trihelix     | TF |
| F01_cb8564_c166913/f2p2/2105-1F | Trihelix     | TF |
| F01_cb8564_c16731/f1p0/3593-0F  | SNF2         | TR |
| F01_cb8564_c16731/f1p0/3593-2F  | SNF2         | TR |
| F01_cb8564_c168338/f2p0/3398-2F | bHLH         | TF |
| F01_cb8564_c17442/f1p1/2792-2F  | B3           | TF |
| F01_cb8564_c1759/f1p0/4103-0F   | Others       | TR |
| F01_cb8564_c176158/f6p0/2068-2F | C2C2-CO-like | TF |
| F01_cb8564_c1764/f1p0/2367-0F   | Others       | TR |
| F01_cb8564_c1771/f3p1/3767-0F   | Others       | TR |
| F01_cb8564_c1772/f1p1/2420-0F   | C2C2-CO-like | TF |
| F01_cb8564_c1773/f2p1/2473-1F   | Others       | TR |
| F01_cb8564_c1775/f1p0/2782-1F   | Others       | TR |
| F01_cb8564_c1777/f1p0/2673-2F   | C2C2-CO-like | TF |
| F01_cb8564_c1780/f1p1/3143-2F   | Others       | TR |
| F01_cb8564_c17806/f1p0/3709-2F  | SNF2         | TR |

---

---

|                                 |              |    |
|---------------------------------|--------------|----|
| F01_cb8564_c1781/f1p1/2101-2F   | C2C2-CO-like | TF |
| F01_cb8564_c1783/f1p0/2556-0F   | C2C2-CO-like | TF |
| F01_cb8564_c1784/f1p0/2603-0F   | C2C2-CO-like | TF |
| F01_cb8564_c181097/f1p0/2142-0F | NAC          | TF |
| F01_cb8564_c18118/f3p4/3114-1F  | HB-HD-ZIP    | TF |
| F01_cb8564_c18359/f1p0/3917-1F  | SNF2         | TR |
| F01_cb8564_c1861/f1p0/2943-1F   | WRKY         | TF |
| F01_cb8564_c1861/f1p0/2943-2F   | WRKY         | TF |
| F01_cb8564_c186144/f1p0/3163-1F | B3-ARF       | TF |
| F01_cb8564_c186144/f1p0/3163-2F | AUX/IAA      | TR |
| F01_cb8564_c1864/f1p0/2035-1F   | WRKY         | TF |
| F01_cb8564_c1864/f1p0/2035-2F   | WRKY         | TF |
| F01_cb8564_c1865/f1p0/2458-1F   | WRKY         | TF |
| F01_cb8564_c18654/f1p0/3773-1F  | SBP          | TF |
| F01_cb8564_c1868/f1p1/2359-2F   | WRKY         | TF |
| F01_cb8564_c18715/f15p2/3609-0F | Jumonji      | TR |
| F01_cb8564_c18743/f1p0/3923-2F  | bHLH         | TF |
| F01_cb8564_c18992/f1p0/3876-0F  | mTERF        | TR |
| F01_cb8564_c19056/f1p2/2030-2F  | AP2/ERF-ERF  | TF |
| F01_cb8564_c1916/f2p0/2923-1F   | NF-X1        | TF |
| F01_cb8564_c19742/f1p4/2984-0F  | HB-HD-ZIP    | TF |
| F01_cb8564_c19805/f1p0/4483-0F  | SNF2         | TR |
| F01_cb8564_c19831/f2p0/3515-1F  | mTERF        | TR |
| F01_cb8564_c19910/f1p0/4399-2F  | B3           | TF |
| F01_cb8564_c20069/f1p1/3817-0F  | MADS-M-type  | TF |
| F01_cb8564_c2041/f2p1/3039-1F   | RWP-RK       | TF |

---

---

|                                 |           |    |
|---------------------------------|-----------|----|
| F01_cb8564_c2042/f2p1/2865-1F   | RWP-RK    | TF |
| F01_cb8564_c2059/f3p1/2245-1F   | NAC       | TF |
| F01_cb8564_c20602/f1p0/2495-2F  | FAR1      | TF |
| F01_cb8564_c2068/f1p0/2547-2F   | RWP-RK    | TF |
| F01_cb8564_c20700/f1p0/4463-0F  | PHD       | TR |
| F01_cb8564_c20962/f1p0/3220-0F  | RWP-RK    | TF |
| F01_cb8564_c21211/f1p0/2788-1F  | GRAS      | TF |
| F01_cb8564_c21527/f7p0/3631-1F  | HB-PHD    | TF |
| F01_cb8564_c21622/f1p1/2491-2F  | AUX/IAA   | TR |
| F01_cb8564_c22308/f1p0/3539-1F  | RWP-RK    | TF |
| F01_cb8564_c22388/f10p2/3754-2F | GRAS      | TF |
| F01_cb8564_c22414/f6p0/4311-1F  | Jumonji   | TR |
| F01_cb8564_c22414/f6p0/4311-2F  | C2H2      | TF |
| F01_cb8564_c22766/f1p1/3652-2F  | HB-HD-ZIP | TF |
| F01_cb8564_c23069/f1p0/2858-2F  | C2H2      | TF |
| F01_cb8564_c23436/f1p0/3497-0F  | PHD       | TR |
| F01_cb8564_c23436/f1p0/3497-2F  | HB-other  | TF |
| F01_cb8564_c23492/f1p0/2909-2F  | bHLH      | TF |
| F01_cb8564_c23497/f1p0/4803-1F  | C2H2      | TF |
| F01_cb8564_c24511/f1p1/2143-0F  | WRKY      | TF |
| F01_cb8564_c24511/f1p1/2143-2F  | WRKY      | TF |
| F01_cb8564_c24616/f1p2/2013-0F  | TUB       | TF |
| F01_cb8564_c24732/f1p0/3220-0F  | TRAF      | TR |
| F01_cb8564_c25256/f1p0/1962-2F  | C2H2      | TF |
| F01_cb8564_c25258/f1p0/2537-0F  | bHLH      | TF |
| F01_cb8564_c25313/f1p0/3934-0F  | TRAF      | TR |

---

---

|                                 |           |    |
|---------------------------------|-----------|----|
| F01_cb8564_c25473/f1p0/3549-1F  | GRAS      | TF |
| F01_cb8564_c25473/f1p0/3549-2F  | GRAS      | TF |
| F01_cb8564_c3050/f1p0/3051-1F   | FAR1      | TF |
| F01_cb8564_c3051/f1p0/2396-2F   | FAR1      | TF |
| F01_cb8564_c3078/f1p0/1893-2F   | FAR1      | TF |
| F01_cb8564_c31858/f2p1/3149-1F  | B3-ARF    | TF |
| F01_cb8564_c3246/f1p0/3869-2F   | GNAT      | TR |
| F01_cb8564_c3275/f1p0/2647-1F   | GNAT      | TR |
| F01_cb8564_c3276/f1p0/2732-0F   | GNAT      | TR |
| F01_cb8564_c3281/f1p0/2701-2F   | GNAT      | TR |
| F01_cb8564_c32899/f13p0/3234-1F | RWP-RK    | TF |
| F01_cb8564_c3309/f1p0/2757-0F   | RWP-RK    | TF |
| F01_cb8564_c34027/f4p0/3345-2F  | RWP-RK    | TF |
| F01_cb8564_c34066/f4p0/3241-0F  | RWP-RK    | TF |
| F01_cb8564_c34233/f3p0/3141-0F  | SBP       | TF |
| F01_cb8564_c34553/f1p0/3407-0F  | SNF2      | TR |
| F01_cb8564_c36086/f1p0/2874-1F  | SNF2      | TR |
| F01_cb8564_c3614/f5p1/2784-0F   | HB-HD-ZIP | TF |
| F01_cb8564_c36410/f1p0/4676-1F  | HB-other  | TF |
| F01_cb8564_c36410/f1p0/4676-2F  | PHD       | TR |
| F01_cb8564_c3674/f1p0/3030-2F   | bHLH      | TF |
| F01_cb8564_c3675/f1p0/2696-0F   | bHLH      | TF |
| F01_cb8564_c36758/f1p0/4378-0F  | PHD       | TR |
| F01_cb8564_c36758/f1p0/4378-2F  | HB-other  | TF |
| F01_cb8564_c3676/f1p0/3441-0F   | bHLH      | TF |
| F01_cb8564_c3679/f1p0/2936-0F   | bHLH      | TF |

---

---

|                                |                |    |
|--------------------------------|----------------|----|
| F01_cb8564_c3680/f1p0/2812-0F  | bHLH           | TF |
| F01_cb8564_c3702/f2p1/2964-2F  | bHLH           | TF |
| F01_cb8564_c3709/f1p0/3392-0F  | bHLH           | TF |
| F01_cb8564_c3710/f1p0/3427-0F  | bHLH           | TF |
| F01_cb8564_c3714/f1p0/2897-2F  | bHLH           | TF |
| F01_cb8564_c3716/f2p0/3418-1F  | bHLH           | TF |
| F01_cb8564_c3717/f1p0/3029-1F  | bHLH           | TF |
| F01_cb8564_c3718/f1p0/2760-1F  | bHLH           | TF |
| F01_cb8564_c37419/f1p0/3185-0F | RWP-RK         | TF |
| F01_cb8564_c37468/f1p0/3466-2F | SWI/SNF-BAF60b | TR |
| F01_cb8564_c37594/f3p1/3734-1F | SBP            | TF |
| F01_cb8564_c37737/f1p0/4956-1F | RWP-RK         | TF |
| F01_cb8564_c3811/f1p0/2840-1F  | RWP-RK         | TF |
| F01_cb8564_c3812/f2p0/2257-2F  | RWP-RK         | TF |
| F01_cb8564_c38940/f1p0/4032-0F | SBP            | TF |
| F01_cb8564_c39144/f1p1/3779-1F | SBP            | TF |
| F01_cb8564_c39181/f2p0/3796-0F | SNF2           | TR |
| F01_cb8564_c39224/f1p0/4176-1F | SNF2           | TR |
| F01_cb8564_c393/f4p2/2731-0F   | HB-BELL        | TF |
| F01_cb8564_c39355/f1p0/3531-2F | SWI/SNF-BAF60b | TR |
| F01_cb8564_c39667/f1p0/2433-2F | C2C2-Dof       | TF |
| F01_cb8564_c39692/f1p0/4120-0R | IWS1           | TR |
| F01_cb8564_c39720/f1p0/4003-1F | SNF2           | TR |
| F01_cb8564_c3985/f1p0/3415-2F  | RWP-RK         | TF |
| F01_cb8564_c3987/f1p1/3626-0F  | RWP-RK         | TF |
| F01_cb8564_c3987/f1p1/3626-2F  | RWP-RK         | TF |

---



---

|                                |                |    |
|--------------------------------|----------------|----|
| F01_cb8564_c3988/f1p0/2802-2F  | RWP-RK         | TF |
| F01_cb8564_c3990/f1p0/2667-2F  | RWP-RK         | TF |
| F01_cb8564_c3992/f1p0/1902-1F  | RWP-RK         | TF |
| F01_cb8564_c3999/f1p0/2898-0F  | RWP-RK         | TF |
| F01_cb8564_c3999/f1p0/2898-2F  | RWP-RK         | TF |
| F01_cb8564_c4002/f1p0/3162-2F  | RWP-RK         | TF |
| F01_cb8564_c4003/f1p2/3053-0F  | RWP-RK         | TF |
| F01_cb8564_c4004/f1p1/2537-2F  | RWP-RK         | TF |
| F01_cb8564_c4005/f1p0/3728-0F  | RWP-RK         | TF |
| F01_cb8564_c4005/f1p0/3728-1F  | RWP-RK         | TF |
| F01_cb8564_c4006/f1p0/3349-0F  | RWP-RK         | TF |
| F01_cb8564_c4006/f1p0/3349-2F  | RWP-RK         | TF |
| F01_cb8564_c4008/f1p0/2754-0F  | RWP-RK         | TF |
| F01_cb8564_c4010/f1p3/2976-1F  | RWP-RK         | TF |
| F01_cb8564_c40127/f1p0/3255-1F | Jumonji        | TR |
| F01_cb8564_c4014/f1p0/2787-1F  | RWP-RK         | TF |
| F01_cb8564_c4014/f1p0/2787-2F  | RWP-RK         | TF |
| F01_cb8564_c4015/f1p0/3731-0F  | RWP-RK         | TF |
| F01_cb8564_c4019/f1p0/4254-0F  | RWP-RK         | TF |
| F01_cb8564_c4019/f1p0/4254-1F  | RWP-RK         | TF |
| F01_cb8564_c40203/f1p0/3161-0F | SWI/SNF-BAF60b | TR |
| F01_cb8564_c4022/f1p0/2899-1F  | RWP-RK         | TF |
| F01_cb8564_c4023/f1p0/2972-1F  | RWP-RK         | TF |
| F01_cb8564_c4025/f1p2/3853-0F  | RWP-RK         | TF |
| F01_cb8564_c4025/f1p2/3853-1F  | RWP-RK         | TF |
| F01_cb8564_c4027/f1p0/2658-0F  | RWP-RK         | TF |

---

---

|                                |        |    |
|--------------------------------|--------|----|
| F01_cb8564_c4030/f1p0/4123-2F  | RWP-RK | TF |
| F01_cb8564_c4033/f1p0/3146-0F  | RWP-RK | TF |
| F01_cb8564_c4037/f1p0/3225-0F  | RWP-RK | TF |
| F01_cb8564_c4037/f1p0/3225-2F  | RWP-RK | TF |
| F01_cb8564_c4038/f1p2/2737-0F  | RWP-RK | TF |
| F01_cb8564_c40403/f2p0/2465-1F | NAC    | TF |
| F01_cb8564_c4045/f1p0/2658-1F  | RWP-RK | TF |
| F01_cb8564_c4045/f1p0/2658-2F  | RWP-RK | TF |
| F01_cb8564_c40701/f1p0/3863-2F | SNF2   | TR |
| F01_cb8564_c4081/f1p0/2462-1F  | SNF2   | TR |
| F01_cb8564_c40999/f1p1/3690-0F | SBP    | TF |
| F01_cb8564_c4135/f1p1/4201-1F  | FAR1   | TF |
| F01_cb8564_c4136/f2p1/2697-1F  | FAR1   | TF |
| F01_cb8564_c4138/f5p2/2729-2F  | FAR1   | TF |
| F01_cb8564_c41919/f1p0/2814-2F | RWP-RK | TF |
| F01_cb8564_c4196/f1p0/2945-1F  | TCP    | TF |
| F01_cb8564_c41964/f1p0/3664-0F | NAC    | TF |
| F01_cb8564_c4197/f3p0/2921-1F  | TCP    | TF |
| F01_cb8564_c42118/f1p0/3109-2F | GRAS   | TF |
| F01_cb8564_c42230/f1p0/4284-1F | B3     | TF |
| F01_cb8564_c423/f7p1/3074-1F   | GRAS   | TF |
| F01_cb8564_c42636/f1p0/3216-0F | HMG    | TR |
| F01_cb8564_c42753/f2p0/2720-0F | NAC    | TF |
| F01_cb8564_c42859/f1p0/3413-0F | SNF2   | TR |
| F01_cb8564_c42859/f1p0/3413-2F | SNF2   | TR |
| F01_cb8564_c42896/f1p1/2299-1F | NAC    | TF |

---

---

|                                |             |    |
|--------------------------------|-------------|----|
| F01_cb8564_c43663/f1p0/2765-1F | AP2/ERF-AP2 | TF |
| F01_cb8564_c44585/f1p0/3901-1F | SBP         | TF |
| F01_cb8564_c44682/f1p0/3745-1F | NAC         | TF |
| F01_cb8564_c44720/f1p0/4093-0F | SBP         | TF |
| F01_cb8564_c44792/f1p0/3463-1F | TUB         | TF |
| F01_cb8564_c4499/f1p0/2986-0F  | C2H2        | TF |
| F01_cb8564_c4501/f1p0/2987-0F  | C2C2-GATA   | TF |
| F01_cb8564_c4504/f1p0/2793-0F  | C2C2-GATA   | TF |
| F01_cb8564_c4519/f1p0/2992-2F  | TUB         | TF |
| F01_cb8564_c4522/f1p0/2198-2F  | TUB         | TF |
| F01_cb8564_c4523/f1p0/2561-1F  | TUB         | TF |
| F01_cb8564_c4523/f1p0/2561-2F  | TUB         | TF |
| F01_cb8564_c4526/f1p0/2249-0F  | TUB         | TF |
| F01_cb8564_c4526/f1p0/2249-2F  | TUB         | TF |
| F01_cb8564_c4527/f2p0/2499-2F  | TUB         | TF |
| F01_cb8564_c4529/f1p0/2635-1F  | TUB         | TF |
| F01_cb8564_c4530/f3p0/2769-1F  | TUB         | TF |
| F01_cb8564_c4530/f3p0/2769-2F  | TUB         | TF |
| F01_cb8564_c45410/f1p0/4404-2F | PHD         | TR |
| F01_cb8564_c45426/f1p0/2266-1F | NAC         | TF |
| F01_cb8564_c45467/f1p0/2463-2F | LUG         | TR |
| F01_cb8564_c46491/f1p0/3510-1F | B3-ARF      | TF |
| F01_cb8564_c4710/f1p0/3063-0F  | WRKY        | TF |
| F01_cb8564_c4715/f6p1/2185-1F  | WRKY        | TF |
| F01_cb8564_c47562/f1p0/4869-2F | NAC         | TF |
| F01_cb8564_c47567/f1p0/3302-0F | RWP-RK      | TF |

---

---

|                                 |                |    |
|---------------------------------|----------------|----|
| F01_cb8564_c48079/f5p1/3512-0F  | SWI/SNF-BAF60b | TR |
| F01_cb8564_c48117/f1p0/2507-2F  | RWP-RK         | TF |
| F01_cb8564_c48460/f1p0/2462-2F  | TCP            | TF |
| F01_cb8564_c4869/f1p0/3091-1F   | C2H2           | TF |
| F01_cb8564_c4884/f1p0/3387-1F   | GRAS           | TF |
| F01_cb8564_c4885/f2p1/3179-2F   | GRAS           | TF |
| F01_cb8564_c4888/f1p0/3367-0F   | GRAS           | TF |
| F01_cb8564_c4890/f2p1/2906-1F   | GRAS           | TF |
| F01_cb8564_c4891/f1p0/3367-1F   | GRAS           | TF |
| F01_cb8564_c4894/f1p1/2708-0F   | GRAS           | TF |
| F01_cb8564_c48947/f1p0/3034-1F  | LUG            | TR |
| F01_cb8564_c4895/f1p0/2700-0F   | GRAS           | TF |
| F01_cb8564_c49348/f15p0/3022-2F | LUG            | TR |
| F01_cb8564_c4938/f1p0/3004-0F   | Others         | TR |
| F01_cb8564_c4939/f1p0/3100-1F   | Others         | TR |
| F01_cb8564_c4940/f1p0/2731-2F   | Others         | TR |
| F01_cb8564_c4941/f1p0/3015-2F   | C2C2-CO-like   | TF |
| F01_cb8564_c4944/f1p0/2151-0F   | C2C2-CO-like   | TF |
| F01_cb8564_c4945/f1p0/1950-0F   | C2C2-CO-like   | TF |
| F01_cb8564_c4948/f1p0/3126-0F   | Others         | TR |
| F01_cb8564_c4948/f1p0/3126-1R   | Others         | TR |
| F01_cb8564_c4950/f1p0/2564-0F   | Others         | TR |
| F01_cb8564_c4961/f1p0/2082-1F   | C2C2-CO-like   | TF |
| F01_cb8564_c4966/f1p0/2245-1F   | C2C2-CO-like   | TF |
| F01_cb8564_c4968/f1p0/2194-0F   | C2C2-CO-like   | TF |
| F01_cb8564_c49758/f1p0/2412-2F  | RWP-RK         | TF |

---

---

|                                |                |    |
|--------------------------------|----------------|----|
| F01_cb8564_c50035/f1p0/4246-0F | RWP-RK         | TF |
| F01_cb8564_c50035/f1p0/4246-2F | RWP-RK         | TF |
| F01_cb8564_c50054/f1p0/2877-0F | NAC            | TF |
| F01_cb8564_c50250/f2p0/4315-1F | C2C2-Dof       | TF |
| F01_cb8564_c5046/f1p0/4363-1F  | DBP            | TF |
| F01_cb8564_c50713/f2p0/3735-1F | RWP-RK         | TF |
| F01_cb8564_c50800/f1p0/3416-2F | NAC            | TF |
| F01_cb8564_c50920/f1p0/4402-0F | RWP-RK         | TF |
| F01_cb8564_c51208/f1p0/3009-0F | RWP-RK         | TF |
| F01_cb8564_c52182/f1p0/3379-2F | SWI/SNF-BAF60b | TR |
| F01_cb8564_c52451/f1p0/3796-2F | SNF2           | TR |
| F01_cb8564_c5251/f1p0/3184-0F  | TRAF           | TR |
| F01_cb8564_c5251/f1p0/3184-2F  | TRAF           | TR |
| F01_cb8564_c5252/f1p0/2216-0F  | TRAF           | TR |
| F01_cb8564_c5252/f1p0/2216-2F  | TRAF           | TR |
| F01_cb8564_c52554/f1p3/3826-1F | C2H2           | TF |
| F01_cb8564_c5257/f1p0/2539-1F  | PHD            | TR |
| F01_cb8564_c52998/f1p1/2110-1F | NAC            | TF |
| F01_cb8564_c52998/f1p1/2110-2F | NAC            | TF |
| F01_cb8564_c53868/f1p0/4757-2F | NAC            | TF |
| F01_cb8564_c54045/f1p0/1961-2F | NAC            | TF |
| F01_cb8564_c54122/f1p1/3367-1F | SWI/SNF-BAF60b | TR |
| F01_cb8564_c54187/f1p0/3412-1F | SWI/SNF-BAF60b | TR |
| F01_cb8564_c54212/f1p0/2443-0F | NAC            | TF |
| F01_cb8564_c57586/f4p1/3438-0F | SWI/SNF-BAF60b | TR |
| F01_cb8564_c608/f6p2/2608-1F   | HB-BELL        | TF |

---

---

|                                 |              |    |
|---------------------------------|--------------|----|
| F01_cb8564_c66437/f7p9/2105-1F  | HB-HD-ZIP    | TF |
| F01_cb8564_c675/f4p4/2437-1F    | C2C2-CO-like | TF |
| F01_cb8564_c68331/f3p0/2030-1F  | SET          | TR |
| F01_cb8564_c68344/f4p0/2522-1F  | mTERF        | TR |
| F01_cb8564_c68846/f10p2/2582-0F | HB-BELL      | TF |
| F01_cb8564_c68939/f2p0/3169-1F  | SBP          | TF |
| F01_cb8564_c69115/f2p0/4131-0F  | Others       | TR |
| F01_cb8564_c69115/f2p0/4131-1F  | Others       | TR |
| F01_cb8564_c69336/f3p0/3731-2F  | HB-PHD       | TF |
| F01_cb8564_c69408/f10p0/2152-0F | Others       | TR |
| F01_cb8564_c70010/f1p0/3088-0F  | SBP          | TF |
| F01_cb8564_c701/f3p0/3014-1F    | Others       | TR |
| F01_cb8564_c70365/f1p1/3583-0F  | HB-other     | TF |
| F01_cb8564_c70365/f1p1/3583-2F  | PHD          | TR |
| F01_cb8564_c70436/f1p0/3032-0F  | C2H2         | TF |
| F01_cb8564_c70911/f1p0/3414-2F  | SBP          | TF |
| F01_cb8564_c70960/f1p0/2362-2F  | C2H2         | TF |
| F01_cb8564_c71551/f1p0/3242-0F  | RWP-RK       | TF |
| F01_cb8564_c71552/f1p0/3651-1F  | bHLH         | TF |
| F01_cb8564_c71574/f1p0/3073-1F  | MYB-related  | TF |
| F01_cb8564_c71574/f1p0/3073-2F  | MYB-related  | TF |
| F01_cb8564_c717/f5p1/2631-0F    | NAC          | TF |
| F01_cb8564_c717/f5p1/2631-1F    | NAC          | TF |
| F01_cb8564_c71826/f1p0/2193-0F  | WRKY         | TF |
| F01_cb8564_c71979/f1p1/2062-0F  | HB-HD-ZIP    | TF |
| F01_cb8564_c72081/f1p0/3245-2F  | HB-PHD       | TF |

---

---

|                                |             |    |
|--------------------------------|-------------|----|
| F01_cb8564_c72135/f1p0/2733-0F | GRAS        | TF |
| F01_cb8564_c72135/f1p0/2733-1F | GRAS        | TF |
| F01_cb8564_c72529/f2p6/2886-0R | MADS-M-type | TF |
| F01_cb8564_c72552/f1p1/3557-1F | HB-PHD      | TF |
| F01_cb8564_c72622/f1p1/3614-1F | C2H2        | TF |
| F01_cb8564_c72701/f1p0/2931-1F | HB-BELL     | TF |
| F01_cb8564_c72755/f6p0/3094-1F | GRAS        | TF |
| F01_cb8564_c72884/f1p3/3343-0F | B3          | TF |
| F01_cb8564_c73123/f1p0/2143-0F | mTERF       | TR |
| F01_cb8564_c73163/f1p0/2503-2F | WRKY        | TF |
| F01_cb8564_c73301/f1p6/2428-1F | MADS-MIKC   | TF |
| F01_cb8564_c73359/f1p1/3245-2F | HB-HD-ZIP   | TF |
| F01_cb8564_c73422/f1p0/3612-2F | SNF2        | TR |
| F01_cb8564_c73924/f1p0/1935-2F | WRKY        | TF |
| F01_cb8564_c74123/f1p1/4911-1F | Others      | TR |
| F01_cb8564_c74150/f1p4/3524-1F | MADS-MIKC   | TF |
| F01_cb8564_c74150/f1p4/3524-2R | HB-BELL     | TF |
| F01_cb8564_c74345/f1p0/4390-2R | ARID        | TR |
| F01_cb8564_c74520/f1p0/3076-1F | C2H2        | TF |
| F01_cb8564_c74621/f1p0/2635-1F | MADS-M-type | TF |
| F01_cb8564_c74719/f1p0/2385-0F | C2H2        | TF |
| F01_cb8564_c75099/f1p1/2485-2F | C2H2        | TF |
| F01_cb8564_c75166/f1p1/2653-2F | C2H2        | TF |
| F01_cb8564_c75382/f1p4/4637-0F | Others      | TR |
| F01_cb8564_c75382/f1p4/4637-2F | Others      | TR |
| F01_cb8564_c75436/f1p0/3300-2F | WRKY        | TF |

---

---

|                                |              |    |
|--------------------------------|--------------|----|
| F01_cb8564_c75453/f1p2/2270-1F | GRAS         | TF |
| F01_cb8564_c75479/f1p1/2639-2F | MADS-MIKC    | TF |
| F01_cb8564_c75491/f1p0/3002-2F | GRAS         | TF |
| F01_cb8564_c75742/f1p0/4694-1F | SET          | TR |
| F01_cb8564_c75900/f1p3/2677-2F | HB-BELL      | TF |
| F01_cb8564_c76081/f1p0/3554-0F | C2H2         | TF |
| F01_cb8564_c76091/f2p0/3755-2F | MYB          | TF |
| F01_cb8564_c76115/f1p0/2356-1F | WRKY         | TF |
| F01_cb8564_c76250/f1p1/3808-0F | C2H2         | TF |
| F01_cb8564_c76380/f1p1/3217-0R | HB-BELL      | TF |
| F01_cb8564_c76434/f1p0/3111-0F | GRAS         | TF |
| F01_cb8564_c76434/f1p0/3111-1F | GRAS         | TF |
| F01_cb8564_c76434/f1p0/3111-2F | GRAS         | TF |
| F01_cb8564_c76463/f1p1/4672-1F | Jumonji      | TR |
| F01_cb8564_c76495/f1p0/3949-1F | bHLH         | TF |
| F01_cb8564_c7674/f6p3/2437-0F  | C2C2-CO-like | TF |
| F01_cb8564_c77044/f1p0/2776-1F | GRAS         | TF |
| F01_cb8564_c77044/f1p0/2776-2F | GRAS         | TF |
| F01_cb8564_c77055/f1p0/2184-2F | WRKY         | TF |
| F01_cb8564_c77521/f1p0/2505-1F | HB-other     | TF |
| F01_cb8564_c77529/f1p1/3590-0F | MYB          | TF |
| F01_cb8564_c77529/f1p1/3590-2F | MYB-related  | TF |
| F01_cb8564_c77748/f1p0/4086-0F | MADS-M-type  | TF |
| F01_cb8564_c77748/f1p0/4086-1F | WRKY         | TF |
| F01_cb8564_c77804/f4p0/2215-1F | WRKY         | TF |
| F01_cb8564_c77886/f1p0/3549-2F | SBP          | TF |

---



---

|                                |           |    |
|--------------------------------|-----------|----|
| F01_cb8564_c77970/f1p0/3545-1F | HB-HD-ZIP | TF |
| F01_cb8564_c77990/f1p0/2338-2F | HB-other  | TF |
| F01_cb8564_c7800/f4p1/3109-1F  | GRAS      | TF |
| F01_cb8564_c78037/f1p1/3201-0R | MADS-MIKC | TF |
| F01_cb8564_c7835/f2p0/2745-0F  | RWP-RK    | TF |
| F01_cb8564_c7849/f2p0/2035-2F  | C3H       | TF |
| F01_cb8564_c78507/f1p0/4935-1F | mTERF     | TR |
| F01_cb8564_c78894/f1p0/3527-2F | HB-PHD    | TF |
| F01_cb8564_c78900/f1p3/4750-2F | Others    | TR |
| F01_cb8564_c78972/f1p0/2676-2F | mTERF     | TR |
| F01_cb8564_c79218/f4p0/4174-2F | SET       | TR |
| F01_cb8564_c79543/f1p0/2014-1F | Trihelix  | TF |
| F01_cb8564_c79566/f1p0/3645-1F | RWP-RK    | TF |
| F01_cb8564_c79790/f1p0/3452-0F | Jumonji   | TR |
| F01_cb8564_c79969/f2p0/4362-1F | Others    | TR |
| F01_cb8564_c80291/f2p0/3316-2F | mTERF     | TR |
| F01_cb8564_c80412/f1p0/2903-2F | Others    | TR |
| F01_cb8564_c80882/f1p0/2524-1F | HB-BELL   | TF |
| F01_cb8564_c81031/f1p0/3466-2F | RWP-RK    | TF |
| F01_cb8564_c81286/f1p2/3636-2F | GRAS      | TF |
| F01_cb8564_c81339/f1p0/2660-2F | STAT      | TF |
| F01_cb8564_c81496/f1p0/4041-1F | WRKY      | TF |
| F01_cb8564_c81654/f1p4/4945-1F | Others    | TR |
| F01_cb8564_c81714/f3p1/2660-2F | C2H2      | TF |
| F01_cb8564_c81913/f1p0/1929-2F | WRKY      | TF |
| F01_cb8564_c81984/f1p0/2454-2F | WRKY      | TF |

---

---

|                                |             |    |
|--------------------------------|-------------|----|
| F01_cb8564_c82013/f1p0/3323-2F | STAT        | TF |
| F01_cb8564_c82382/f1p0/3622-1F | mTERF       | TR |
| F01_cb8564_c82480/f1p0/2150-2F | MADS-M-type | TF |
| F01_cb8564_c82558/f1p0/3707-2F | HB-PHD      | TF |
| F01_cb8564_c83008/f1p0/3371-0F | LUG         | TR |
| F01_cb8564_c83336/f1p0/2732-0F | HB-BELL     | TF |
| F01_cb8564_c83474/f1p1/3380-0F | Jumonji     | TR |
| F01_cb8564_c83547/f1p5/3039-2F | HB-BELL     | TF |
| F01_cb8564_c83566/f1p3/4576-2F | Others      | TR |
| F01_cb8564_c83619/f1p0/2534-1F | STAT        | TF |
| F01_cb8564_c83750/f1p0/3418-1F | RWP-RK      | TF |
| F01_cb8564_c83974/f2p0/4733-2F | mTERF       | TR |
| F01_cb8564_c84092/f1p0/2571-0F | Trihelix    | TF |
| F01_cb8564_c84092/f1p0/2571-2F | Trihelix    | TF |
| F01_cb8564_c84130/f1p2/3574-2F | SBP         | TF |
| F01_cb8564_c844/f2p0/2586-0F   | bHLH        | TF |
| F01_cb8564_c84436/f1p0/2677-0F | PHD         | TR |
| F01_cb8564_c84436/f1p0/2677-1F | HB-other    | TF |
| F01_cb8564_c84457/f1p2/4101-2F | Others      | TR |
| F01_cb8564_c84910/f1p0/3224-0F | mTERF       | TR |
| F01_cb8564_c85001/f1p0/3853-2F | HB-PHD      | TF |
| F01_cb8564_c85084/f1p0/1955-1F | TRAF        | TR |
| F01_cb8564_c85255/f1p1/2783-1F | C2H2        | TF |
| F01_cb8564_c86003/f1p0/2279-1F | Others      | TR |
| F01_cb8564_c86076/f1p0/4428-2F | Others      | TR |
| F01_cb8564_c86299/f1p1/3123-1F | Others      | TR |

---

---

|                                |                |    |
|--------------------------------|----------------|----|
| F01_cb8564_c86299/f1p1/3123-2F | Others         | TR |
| F01_cb8564_c86312/f1p1/2565-0F | Jumonji        | TR |
| F01_cb8564_c86352/f2p0/2565-2F | HB-BELL        | TF |
| F01_cb8564_c86441/f1p0/2175-0F | C2H2           | TF |
| F01_cb8564_c86457/f1p0/4530-0F | MADS-M-type    | TF |
| F01_cb8564_c86457/f1p0/4530-2F | MADS-M-type    | TF |
| F01_cb8564_c86479/f1p0/3266-0F | Jumonji        | TR |
| F01_cb8564_c865/f4p0/2761-0F   | bHLH           | TF |
| F01_cb8564_c86688/f1p0/3136-2F | Jumonji        | TR |
| F01_cb8564_c86788/f1p0/2078-2F | WRKY           | TF |
| F01_cb8564_c86873/f1p1/4866-2F | Others         | TR |
| F01_cb8564_c86900/f1p0/3283-1F | SWI/SNF-BAF60b | TR |
| F01_cb8564_c87010/f1p2/2598-0F | HB-BELL        | TF |
| F01_cb8564_c87256/f1p0/2285-2F | HB-BELL        | TF |
| F01_cb8564_c87817/f1p0/3148-0F | LUG            | TR |
| F01_cb8564_c88377/f1p1/4091-0F | RWP-RK         | TF |
| F01_cb8564_c88377/f1p1/4091-1F | RWP-RK         | TF |
| F01_cb8564_c88512/f1p0/4140-0F | Others         | TR |
| F01_cb8564_c88512/f1p0/4140-1F | Others         | TR |
| F01_cb8564_c88543/f1p0/3439-0F | PHD            | TR |
| F01_cb8564_c88543/f1p0/3439-2F | HB-other       | TF |
| F01_cb8564_c88616/f1p1/2497-0F | HB-other       | TF |
| F01_cb8564_c88686/f1p0/3352-1F | SBP            | TF |
| F01_cb8564_c88743/f1p0/1985-0F | mTERF          | TR |
| F01_cb8564_c88743/f1p0/1985-2F | mTERF          | TR |
| F01_cb8564_c88774/f1p2/3565-1F | SNF2           | TR |

---

---

|                                |             |    |
|--------------------------------|-------------|----|
| F01_cb8564_c89502/f1p0/2946-0F | WRKY        | TF |
| F01_cb8564_c89525/f1p0/3645-1F | HB-PHD      | TF |
| F01_cb8564_c89737/f1p0/3593-2F | MADS-M-type | TF |
| F01_cb8564_c89871/f1p2/3359-2F | B3-ARF      | TF |
| F01_cb8564_c90047/f1p0/3038-0F | Others      | TR |
| F01_cb8564_c90047/f1p0/3038-1F | Others      | TR |
| F01_cb8564_c90076/f1p1/3925-2F | STAT        | TF |
| F01_cb8564_c90128/f1p0/3205-1F | Others      | TR |
| F01_cb8564_c90316/f1p1/3596-2F | SBP         | TF |
| F01_cb8564_c90424/f1p0/2623-2F | HB-BELL     | TF |
| F01_cb8564_c90495/f1p1/4661-2F | Jumonji     | TR |
| F01_cb8564_c90606/f1p0/2204-0F | C2H2        | TF |
| F01_cb8564_c90653/f1p0/3252-0F | WRKY        | TF |
| F01_cb8564_c90653/f1p0/3252-1F | WRKY        | TF |
| F01_cb8564_c90653/f1p0/3252-2F | WRKY        | TF |
| F01_cb8564_c90906/f1p0/3670-2F | Jumonji     | TR |
| F01_cb8564_c910/f6p2/2725-1F   | HB-BELL     | TF |
| F01_cb8564_c91136/f1p0/3087-2F | B3-ARF      | TF |
| F01_cb8564_c91169/f1p0/3575-2F | SNF2        | TR |
| F01_cb8564_c91176/f1p0/2480-0F | MADS-M-type | TF |
| F01_cb8564_c91176/f1p0/2480-2F | MADS-M-type | TF |
| F01_cb8564_c91216/f1p0/2554-0F | C2H2        | TF |
| F01_cb8564_c9126/f4p0/2131-2F  | WRKY        | TF |
| F01_cb8564_c91354/f1p0/3094-0F | C2H2        | TF |
| F01_cb8564_c91515/f1p0/3340-0R | MADS-MIKC   | TF |
| F01_cb8564_c91515/f1p0/3340-2F | HB-other    | TF |

---

---

|                                |             |    |
|--------------------------------|-------------|----|
| F01_cb8564_c91515/f1p0/3340-2R | MADS-M-type | TF |
| F01_cb8564_c91942/f1p0/3111-2F | mTERF       | TR |
| F01_cb8564_c92050/f1p0/1905-1F | mTERF       | TR |
| F01_cb8564_c92050/f1p0/1905-2F | mTERF       | TR |
| F01_cb8564_c92199/f1p0/2079-0F | mTERF       | TR |
| F01_cb8564_c9224/f5p1/2112-0F  | WRKY        | TF |
| F01_cb8564_c92362/f1p0/3943-1R | FAR1        | TF |
| F01_cb8564_c9265/f3p1/3275-2F  | B3-ARF      | TF |
| F01_cb8564_c927/f7p2/2538-1F   | FAR1        | TF |
| F01_cb8564_c93615/f1p2/1871-0F | HB-HD-ZIP   | TF |
| F01_cb8564_c9461/f3p0/2447-0F  | WRKY        | TF |
| F01_cb8564_c9657/f4p0/1983-0F  | WRKY        | TF |
| F01_cb8564_c9705/f9p0/2288-2F  | TRAF        | TR |
| F01_cb8564_c971/f3p0/2749-0F   | GRAS        | TF |
| F01_cb8564_c971/f3p0/2749-1F   | GRAS        | TF |
| F01_cb8564_c9798/f7p1/3585-1F  | MYB         | TF |
| F01_cb8564_c98278/f5p6/2387-1F | NAC         | TF |
| F01_cb8564_c98300/f2p1/2186-1F | WRKY        | TF |
| F01_cb8564_c9837/f2p0/4515-2F  | bHLH        | TF |
| F01_cb8564_c9866/f2p0/3472-2F  | GRAS        | TF |
| F01_cb8564_c987/f3p1/1950-0F   | RWP-RK      | TF |
| F01_cb8576_c1/f2p0/2240-1F     | GARP-ARR-B  | TF |
| F01_cb8576_c3/f1p0/2311-2F     | Others      | TR |
| F01_cb8576_c4/f1p0/2300-2F     | GARP-ARR-B  | TF |
| F01_cb8576_c6/f1p0/2313-0F     | GARP-ARR-B  | TF |
| F01_cb8586_c3/f1p1/2345-0F     | C3H         | TF |

---

---

|                             |              |    |
|-----------------------------|--------------|----|
| F01_cb8586_c5/f1p1/2288-1F  | C3H          | TF |
| F01_cb8586_c5/f1p1/2288-2F  | C3H          | TF |
| F01_cb8586_c9/f1p3/1411-2F  | C3H          | TF |
| F01_cb8590_c1/f1p0/2319-2F  | C2C2-CO-like | TF |
| F01_cb8590_c2/f1p0/2063-2F  | C2C2-CO-like | TF |
| F01_cb8590_c3/f1p0/2298-1F  | C2C2-CO-like | TF |
| F01_cb8590_c5/f1p0/2246-0F  | Others       | TR |
| F01_cb8590_c8/f3p0/1964-2F  | C2C2-CO-like | TF |
| F01_cb8606_c2/f1p0/2322-0F  | C2C2-Dof     | TF |
| F01_cb8606_c5/f2p0/2106-2F  | C2C2-Dof     | TF |
| F01_cb8620_c0/f1p0/2318-0F  | mTERF        | TR |
| F01_cb8620_c1/f1p0/2443-1F  | mTERF        | TR |
| F01_cb8643_c1/f1p0/2309-1F  | C2C2-CO-like | TF |
| F01_cb8643_c2/f1p0/2364-2F  | Others       | TR |
| F01_cb8643_c3/f1p0/1354-1F  | Others       | TR |
| F01_cb8643_c5/f1p0/1313-1F  | C2C2-CO-like | TF |
| F01_cb8650_c0/f3p0/2134-1R  | B3-ARF       | TF |
| F01_cb8650_c2/f1p0/2263-1R  | B3           | TF |
| F01_cb8650_c3/f1p0/2250-0R  | AUX/IAA      | TR |
| F01_cb8650_c3/f1p0/2250-2R  | B3-ARF       | TF |
| F01_cb8650_c4/f1p1/2111-1R  | AUX/IAA      | TR |
| F01_cb8650_c4/f1p1/2111-2R  | B3-ARF       | TF |
| F01_cb8662_c0/f4p0/2191-0F  | Others       | TR |
| F01_cb8662_c12/f1p0/2017-0F | Others       | TR |
| F01_cb8662_c13/f1p0/2219-1F | Others       | TR |
| F01_cb8662_c2/f1p0/2305-1F  | Others       | TR |

---

---

|                            |              |    |
|----------------------------|--------------|----|
| F01_cb8662_c3/f1p0/2862-0F | Others       | TR |
| F01_cb8662_c4/f1p0/1962-1F | Others       | TR |
| F01_cb8662_c5/f1p0/2097-1F | Others       | TR |
| F01_cb8662_c6/f1p0/2072-1F | Others       | TR |
| F01_cb8662_c8/f1p0/2813-1F | Others       | TR |
| F01_cb8662_c9/f1p1/2326-0F | Others       | TR |
| F01_cb8735_c0/f1p0/2263-2F | SET          | TR |
| F01_cb8736_c0/f1p0/1765-1F | C2C2-Dof     | TF |
| F01_cb8736_c1/f1p0/2285-1F | C2C2-Dof     | TF |
| F01_cb8736_c3/f1p0/2166-0F | C2C2-Dof     | TF |
| F01_cb8736_c4/f1p0/1975-2F | C2C2-Dof     | TF |
| F01_cb8736_c5/f1p0/1859-1F | C2C2-Dof     | TF |
| F01_cb8736_c6/f1p0/1826-1F | C2C2-Dof     | TF |
| F01_cb8736_c7/f1p0/1795-2F | C2C2-Dof     | TF |
| F01_cb8742_c0/f1p0/2279-2F | AP2/ERF-ERF  | TF |
| F01_cb8742_c2/f1p0/2097-0F | AP2/ERF-AP2  | TF |
| F01_cb8742_c3/f1p0/2145-0F | AP2/ERF-ERF  | TF |
| F01_cb8742_c4/f1p0/2053-2F | AP2/ERF-AP2  | TF |
| F01_cb8743_c0/f3p0/2049-0F | MYB-related  | TF |
| F01_cb8743_c1/f2p0/1977-0F | MYB-related  | TF |
| F01_cb8743_c2/f1p0/2279-1F | MYB-related  | TF |
| F01_cb8743_c3/f1p0/2167-1F | MYB-related  | TF |
| F01_cb8748_c1/f2p0/1899-2F | AP2/ERF-ERF  | TF |
| F01_cb8748_c3/f1p0/1911-0F | AP2/ERF-ERF  | TF |
| F01_cb8748_c5/f1p1/1962-0F | AP2/ERF-ERF  | TF |
| F01_cb8754_c0/f3p0/1561-0F | C2C2-CO-like | TF |

---

---

|                             |              |    |
|-----------------------------|--------------|----|
| F01_cb8754_c3/f1p0/1687-2F  | C2C2-CO-like | TF |
| F01_cb8754_c4/f1p0/1667-1F  | Others       | TR |
| F01_cb8829_c0/f2p0/2146-1F  | C2C2-Dof     | TF |
| F01_cb8829_c1/f1p0/2259-2F  | C2C2-Dof     | TF |
| F01_cb8829_c3/f1p0/2284-0F  | C2C2-Dof     | TF |
| F01_cb8845_c0/f2p0/2260-2F  | C2H2         | TF |
| F01_cb8857_c2/f1p0/2216-2F  | Trihelix     | TF |
| F01_cb8857_c3/f1p1/2039-0F  | Trihelix     | TF |
| F01_cb8857_c4/f1p0/2204-2F  | Trihelix     | TF |
| F01_cb8857_c9/f5p1/2109-0F  | Trihelix     | TF |
| F01_cb8888_c0/f1p0/2243-0F  | mTERF        | TR |
| F01_cb8888_c1/f1p0/2099-1F  | mTERF        | TR |
| F01_cb8888_c1/f1p0/2099-2F  | mTERF        | TR |
| F01_cb8888_c2/f1p0/2242-2F  | mTERF        | TR |
| F01_cb8923_c0/f1p0/2224-0F  | WRKY         | TF |
| F01_cb8923_c1/f1p0/2166-2F  | WRKY         | TF |
| F01_cb8930_c0/f1p0/2228-2F  | Tify         | TF |
| F01_cb8930_c1/f1p0/2241-0F  | Tify         | TF |
| F01_cb8930_c2/f1p0/1839-2F  | Tify         | TF |
| F01_cb8930_c3/f1p0/1794-0F  | Tify         | TF |
| F01_cb8930_c4/f1p0/1315-0F  | Tify         | TF |
| F01_cb8939_c1/f4p1/1236-2F  | Tify         | TF |
| F01_cb8939_c10/f1p0/1284-2F | Tify         | TF |
| F01_cb8939_c14/f1p0/8770-2F | Tify         | TF |
| F01_cb8939_c16/f3p1/1296-1F | Tify         | TF |
| F01_cb8939_c18/f1p1/1256-2F | Tify         | TF |

---



---

|                             |                |    |
|-----------------------------|----------------|----|
| F01_cb8939_c4/f2p0/2227-2F  | Tify           | TF |
| F01_cb8939_c5/f1p0/2247-0F  | Tify           | TF |
| F01_cb8939_c6/f1p0/2221-1F  | Tify           | TF |
| F01_cb8939_c7/f1p2/1298-0F  | Tify           | TF |
| F01_cb893_c0/f2p0/10966-2F  | SNF2           | TR |
| F01_cb8954_c17/f1p0/1263-2F | GNAT           | TR |
| F01_cb8970_c1/f1p0/2482-0F  | MYB-related    | TF |
| F01_cb8970_c2/f1p0/1764-0F  | MYB-related    | TF |
| F01_cb8995_c10/f1p0/2440-0F | SWI/SNF-BAF60b | TR |
| F01_cb8995_c11/f1p0/2278-2F | SWI/SNF-BAF60b | TR |
| F01_cb8995_c4/f1p0/2502-2F  | SWI/SNF-BAF60b | TR |
| F01_cb8995_c5/f1p0/2524-2F  | SWI/SNF-BAF60b | TR |
| F01_cb8995_c6/f1p0/2230-2F  | SWI/SNF-BAF60b | TR |
| F01_cb8995_c8/f1p0/2000-1F  | SWI/SNF-BAF60b | TR |
| F01_cb9016_c0/f5p0/2211-2F  | RWP-RK         | TF |
| F01_cb9016_c5/f1p0/1921-0F  | RWP-RK         | TF |
| F01_cb9016_c9/f1p0/2025-0F  | RWP-RK         | TF |
| F01_cb9034_c0/f1p0/2207-0F  | C2C2-Dof       | TF |
| F01_cb9034_c2/f1p0/2069-1F  | C2C2-Dof       | TF |
| F01_cb9049_c4/f1p1/1367-0F  | HB-other       | TF |
| F01_cb9049_c6/f1p0/1253-2F  | HB-other       | TF |
| F01_cb9079_c11/f1p0/1031-2F | C3H            | TF |
| F01_cb9103_c0/f2p0/1625-0F  | bZIP           | TF |
| F01_cb9103_c2/f1p0/2165-0F  | bZIP           | TF |
| F01_cb9125_c11/f1p0/1951-0F | bHLH           | TF |
| F01_cb9125_c20/f1p1/1894-1F | bHLH           | TF |

---

---

|                             |             |    |
|-----------------------------|-------------|----|
| F01_cb9125_c7/f1p0/2617-1F  | bHLH        | TF |
| F01_cb9125_c8/f1p0/1957-1F  | bHLH        | TF |
| F01_cb9125_c9/f1p0/2006-1F  | bHLH        | TF |
| F01_cb9141_c0/f2p0/1528-0F  | bZIP        | TF |
| F01_cb9141_c2/f1p0/1896-2F  | bZIP        | TF |
| F01_cb9141_c3/f1p0/1793-2F  | bZIP        | TF |
| F01_cb9141_c4/f1p0/1781-1F  | bZIP        | TF |
| F01_cb9141_c5/f1p0/1620-0F  | bZIP        | TF |
| F01_cb9165_c0/f1p0/2184-2F  | AP2/ERF-ERF | TF |
| F01_cb9165_c1/f1p0/1910-0F  | AP2/ERF-ERF | TF |
| F01_cb9165_c1/f1p0/1910-2F  | AP2/ERF-ERF | TF |
| F01_cb9189_c2/f2p0/2107-0F  | Whirly      | TF |
| F01_cb9189_c3/f2p0/1312-1F  | Whirly      | TF |
| F01_cb9189_c4/f1p0/2159-2F  | Whirly      | TF |
| F01_cb9189_c5/f1p0/1254-1F  | Whirly      | TF |
| F01_cb9189_c8/f2p0/1131-0F  | Whirly      | TF |
| F01_cb9191_c0/f1p0/2159-0F  | MADS-M-type | TF |
| F01_cb9192_c3/f1p0/1755-0F  | GNAT        | TR |
| F01_cb9192_c4/f1p0/1696-0F  | GNAT        | TR |
| F01_cb9228_c0/f4p1/2141-1F  | bZIP        | TF |
| F01_cb9228_c2/f1p0/3917-0F  | bZIP        | TF |
| F01_cb9228_c5/f1p1/2025-0F  | bZIP        | TF |
| F01_cb9237_c15/f1p0/2147-1F | AP2/ERF-ERF | TF |
| F01_cb9237_c16/f1p2/2049-2F | AP2/ERF-ERF | TF |
| F01_cb9237_c5/f1p1/1918-2F  | AP2/ERF-ERF | TF |
| F01_cb9237_c6/f1p0/2527-0F  | AP2/ERF-ERF | TF |

---

---

|                             |             |    |
|-----------------------------|-------------|----|
| F01_cb9237_c7/f1p0/1965-0F  | AP2/ERF-ERF | TF |
| F01_cb9294_c0/f1p0/1892-1F  | C3H         | TF |
| F01_cb9294_c1/f2p0/1458-0F  | C3H         | TF |
| F01_cb9294_c2/f1p0/2126-2F  | C3H         | TF |
| F01_cb9297_c3/f1p1/1908-0F  | SET         | TR |
| F01_cb92_c10/f1p1/5011-1F   | Others      | TR |
| F01_cb92_c11/f1p0/4947-1F   | Others      | TR |
| F01_cb92_c11/f1p0/4947-2F   | Others      | TR |
| F01_cb92_c2/f1p0/4936-1F    | Others      | TR |
| F01_cb92_c2/f1p0/4936-2F    | Others      | TR |
| F01_cb92_c8/f1p0/5075-0F    | Others      | TR |
| F01_cb9317_c10/f1p1/1720-2F | AUX/IAA     | TR |
| F01_cb9317_c11/f1p1/1656-2F | AUX/IAA     | TR |
| F01_cb9317_c12/f1p0/1624-0F | AUX/IAA     | TR |
| F01_cb9317_c12/f1p0/1624-1F | AUX/IAA     | TR |
| F01_cb9317_c5/f2p3/1769-0F  | AUX/IAA     | TR |
| F01_cb9317_c6/f1p0/2118-0F  | AUX/IAA     | TR |
| F01_cb9317_c7/f1p0/4812-0F  | AUX/IAA     | TR |
| F01_cb9317_c7/f1p0/4812-2F  | AUX/IAA     | TR |
| F01_cb9317_c8/f1p0/1919-1F  | AUX/IAA     | TR |
| F01_cb9317_c9/f1p1/1734-0F  | AUX/IAA     | TR |
| F01_cb9325_c0/f1p0/2118-0R  | C2H2        | TF |
| F01_cb9325_c1/f1p0/2784-1F  | HMG         | TR |
| F01_cb9325_c1/f1p0/2784-2R  | C2H2        | TF |
| F01_cb9326_c0/f1p0/2116-2F  | Trihelix    | TF |
| F01_cb9377_c0/f1p0/2020-0F  | TRAF        | TR |

---

---

|                             |             |    |
|-----------------------------|-------------|----|
| F01_cb9377_c1/f1p0/1909-2F  | TRAF        | TR |
| F01_cb9377_c2/f1p0/1657-0F  | TRAF        | TR |
| F01_cb9377_c4/f1p0/1554-2F  | TRAF        | TR |
| F01_cb9393_c0/f2p0/1980-1F  | C3H         | TF |
| F01_cb9393_c2/f1p0/2047-1F  | C3H         | TF |
| F01_cb9393_c5/f1p0/1658-0F  | C3H         | TF |
| F01_cb9393_c5/f1p0/1658-2F  | C3H         | TF |
| F01_cb9416_c0/f5p0/2093-1F  | WRKY        | TF |
| F01_cb9416_c2/f1p0/2094-0F  | WRKY        | TF |
| F01_cb9416_c5/f1p0/2153-0F  | WRKY        | TF |
| F01_cb9416_c7/f1p0/1853-1F  | WRKY        | TF |
| F01_cb9416_c8/f1p0/1831-2F  | WRKY        | TF |
| F01_cb9422_c2/f1p0/2085-0F  | FAR1        | TF |
| F01_cb9422_c2/f1p0/2085-2F  | FAR1        | TF |
| F01_cb9436_c10/f1p0/2077-2F | WRKY        | TF |
| F01_cb9436_c13/f1p0/2211-1F | WRKY        | TF |
| F01_cb9436_c13/f1p0/2211-2F | WRKY        | TF |
| F01_cb9436_c14/f3p0/2049-0F | WRKY        | TF |
| F01_cb9436_c14/f3p0/2049-2F | WRKY        | TF |
| F01_cb9436_c4/f1p0/2516-0F  | WRKY        | TF |
| F01_cb9437_c0/f1p0/2082-2F  | TRAF        | TR |
| F01_cb9437_c1/f1p0/2267-2F  | TRAF        | TR |
| F01_cb947_c12/f1p0/2397-2F  | SET         | TR |
| F01_cb9482_c1/f1p0/2038-1F  | MYB-related | TF |
| F01_cb9482_c1/f1p0/2038-2F  | MYB-related | TF |
| F01_cb9482_c4/f1p0/1339-1F  | MYB         | TF |

---

---

|                            |              |    |
|----------------------------|--------------|----|
| F01_cb9504_c0/f2p0/1821-2F | GARP-G2-like | TF |
| F01_cb9504_c1/f1p0/1994-0F | GARP-G2-like | TF |
| F01_cb9504_c2/f1p0/1693-0F | GARP-G2-like | TF |
| F01_cb9505_c0/f1p0/2059-0F | SET          | TR |
| F01_cb9505_c1/f1p0/2153-0F | SET          | TR |
| F01_cb9505_c2/f1p0/1943-0F | SET          | TR |
| F01_cb9523_c3/f1p0/1657-1F | C2C2-GATA    | TF |
| F01_cb9549_c0/f3p0/1849-2F | NAC          | TF |
| F01_cb9549_c1/f2p0/1736-1F | NAC          | TF |
| F01_cb9549_c2/f1p0/2047-2F | NAC          | TF |
| F01_cb9549_c3/f1p0/1890-2F | NAC          | TF |
| F01_cb9549_c4/f1p0/1874-0F | NAC          | TF |
| F01_cb9549_c6/f1p0/1758-0F | NAC          | TF |
| F01_cb9549_c7/f1p0/1719-2F | NAC          | TF |
| F01_cb9549_c8/f1p0/1542-2F | NAC          | TF |
| F01_cb9570_c0/f1p0/2043-1F | GRF          | TF |
| F01_cb9570_c1/f1p0/2120-1F | GRF          | TF |
| F01_cb9573_c0/f3p0/2033-0F | E2F-DP       | TF |
| F01_cb9584_c2/f3p0/1964-0F | GRAS         | TF |
| F01_cb9584_c3/f5p0/1956-0F | GRAS         | TF |
| F01_cb9584_c3/f5p0/1956-1F | GRAS         | TF |
| F01_cb9585_c4/f5p2/1968-0F | TCP          | TF |
| F01_cb9596_c0/f3p0/1935-0F | GRAS         | TF |
| F01_cb9596_c0/f3p0/1935-1F | GRAS         | TF |
| F01_cb9596_c3/f1p0/1889-0F | GRAS         | TF |
| F01_cb9596_c4/f1p0/1930-1F | GRAS         | TF |

---

---

|                             |          |    |
|-----------------------------|----------|----|
| F01_cb9597_c0/f3p0/1932-2F  | HB-KNOX  | TF |
| F01_cb9597_c1/f3p0/1890-1F  | HB-KNOX  | TF |
| F01_cb9597_c3/f2p0/1924-0F  | HB-KNOX  | TF |
| F01_cb9597_c5/f1p0/1754-1F  | HB-other | TF |
| F01_cb9597_c7/f1p0/1069-1F  | HB-other | TF |
| F01_cb9621_c12/f1p0/899-2F  | MYB      | TF |
| F01_cb9621_c14/f4p0/2004-2F | MYB      | TF |
| F01_cb9621_c4/f2p1/1113-0F  | MYB      | TF |
| F01_cb9621_c7/f1p1/1114-0F  | MYB      | TF |
| F01_cb9621_c8/f1p0/1100-0F  | MYB      | TF |
| F01_cb9632_c0/f1p0/2027-1F  | SET      | TR |
| F01_cb9632_c1/f1p0/1923-2F  | SET      | TR |
| F01_cb9632_c2/f1p0/1999-1F  | SET      | TR |
| F01_cb9644_c10/f1p0/1952-0F | GNAT     | TR |
| F01_cb9644_c3/f1p1/3224-0F  | GNAT     | TR |
| F01_cb9644_c4/f1p1/2067-1F  | GNAT     | TR |
| F01_cb9644_c7/f1p0/2639-1F  | GNAT     | TR |
| F01_cb9653_c4/f1p1/1931-2F  | TRAF     | TR |
| F01_cb9673_c1/f1p2/2014-1F  | DBP      | TF |
| F01_cb9673_c3/f1p0/1890-1F  | DBP      | TF |
| F01_cb9692_c0/f3p0/1992-0F  | bHLH     | TF |
| F01_cb9692_c1/f1p0/1801-1F  | bHLH     | TF |
| F01_cb9693_c0/f1p0/2046-0F  | SET      | TR |
| F01_cb9693_c1/f1p0/1933-1F  | SET      | TR |
| F01_cb9693_c2/f1p0/1900-0F  | SET      | TR |
| F01_cb9714_c2/f1p0/2093-2F  | C2H2     | TF |

---

---

|                            |              |    |
|----------------------------|--------------|----|
| F01_cb9714_c3/f1p0/2243-0F | C2H2         | TF |
| F01_cb9727_c1/f1p0/1995-1F | B3           | TF |
| F01_cb9727_c2/f1p0/2172-2F | B3           | TF |
| F01_cb9727_c4/f1p1/1862-0F | B3           | TF |
| F01_cb9735_c3/f1p0/2913-0F | Trihelix     | TF |
| F01_cb9738_c2/f1p0/1750-2F | mTERF        | TR |
| F01_cb9738_c3/f2p0/1998-0F | mTERF        | TR |
| F01_cb9738_c4/f1p0/1937-2F | mTERF        | TR |
| F01_cb9745_c0/f1p0/1990-2F | MADS-M-type  | TF |
| F01_cb9745_c1/f1p0/2229-0F | MADS-MIKC    | TF |
| F01_cb9745_c2/f1p0/1545-0F | MADS-M-type  | TF |
| F01_cb9745_c3/f1p0/1260-0F | MADS-MIKC    | TF |
| F01_cb9749_c2/f1p0/1908-2F | TCP          | TF |
| F01_cb9749_c3/f1p0/1799-0F | TCP          | TF |
| F01_cb9749_c6/f1p0/1269-0F | TCP          | TF |
| F01_cb9751_c2/f1p0/2163-0F | HSF          | TF |
| F01_cb9751_c4/f1p0/1614-2F | HSF          | TF |
| F01_cb9771_c0/f1p0/1982-0F | SET          | TR |
| F01_cb9771_c1/f1p1/2599-0F | SET          | TR |
| F01_cb9772_c1/f1p0/1982-1F | GARP-G2-like | TF |
| F01_cb9772_c7/f1p0/1217-2F | GARP-G2-like | TF |
| F01_cb9777_c0/f2p0/1880-1F | bHLH         | TF |
| F01_cb9777_c1/f2p0/1937-1F | bHLH         | TF |
| F01_cb9777_c2/f1p0/1970-0F | bHLH         | TF |
| F01_cb9777_c3/f1p0/1950-2F | bHLH         | TF |
| F01_cb9777_c5/f1p0/799-0F  | bHLH         | TF |

---

---

|                             |          |    |
|-----------------------------|----------|----|
| F01_cb9815_c2/f1p0/2812-0F  | C3H      | TF |
| F01_cb9815_c3/f1p0/1942-0F  | C3H      | TF |
| F01_cb9815_c4/f1p0/1909-1F  | C3H      | TF |
| F01_cb9816_c2/f2p1/1967-0F  | bHLH     | TF |
| F01_cb9816_c3/f1p1/1924-2F  | bHLH     | TF |
| F01_cb9821_c10/f3p1/1861-1F | TUB      | TF |
| F01_cb9821_c4/f1p1/2016-0F  | TUB      | TF |
| F01_cb9821_c7/f1p1/1778-2F  | TUB      | TF |
| F01_cb9833_c0/f1p0/1962-0R  | AUX/IAA  | TR |
| F01_cb9833_c1/f1p0/3484-0R  | AUX/IAA  | TR |
| F01_cb9833_c1/f1p0/3484-1R  | AUX/IAA  | TR |
| F01_cb9833_c1/f1p0/3484-2R  | AUX/IAA  | TR |
| F01_cb9838_c0/f2p0/1881-0F  | HB-other | TF |
| F01_cb9838_c2/f1p0/1913-2F  | HB-KNOX  | TF |
| F01_cb9839_c0/f3p0/1910-1F  | C3H      | TF |
| F01_cb9842_c0/f1p0/1957-2F  | DBP      | TF |
| F01_cb9853_c0/f1p0/1951-1F  | NAC      | TF |
| F01_cb9853_c2/f1p0/1484-0F  | NAC      | TF |
| F01_cb9864_c0/f1p0/1948-2F  | CPP      | TF |
| F01_cb9864_c1/f1p0/2873-2F  | CPP      | TF |
| F01_cb9931_c0/f2p0/1899-1F  | mTERF    | TR |
| F01_cb9952_c0/f4p1/1799-2F  | C3H      | TF |
| F01_cb9952_c11/f3p1/1866-0F | C3H      | TF |
| F01_cb9952_c2/f3p1/1779-2F  | C3H      | TF |
| F01_cb9952_c6/f1p0/1699-1F  | C3H      | TF |
| F01_cb9952_c7/f1p0/1663-0F  | C3H      | TF |

---



---

|                              |                       |    |
|------------------------------|-----------------------|----|
| F01_cb9952_c7/f1p0/1663-2F   | C3H                   | TF |
| F01_cb9981_c10/f1p0/1696-1F  | bZIP                  | TF |
| F01_cb9981_c12/f1p1/5105-0F  | bZIP                  | TF |
| F01_cb9981_c12/f1p1/5105-2F  | bZIP                  | TF |
| F01_cb9981_c2/f2p1/1754-0F   | bZIP                  | TF |
| F01_cb9981_c3/f1p0/1893-2F   | bZIP                  | TF |
| F01_cb9981_c4/f1p0/2004-2F   | bZIP                  | TF |
| F01_cb9981_c5/f1p0/1871-2F   | bZIP                  | TF |
| F01_cb9981_c6/f1p1/1869-0F   | bZIP                  | TF |
| F01_cb9981_c7/f1p2/1848-2F   | bZIP                  | TF |
| F01_cb9981_c8/f1p0/1812-2F   | bZIP                  | TF |
| F01_cb9981_c9/f1p1/1748-2F   | bZIP                  | TF |
| F01_cb9_c0/f2p0/2178-2F      | PHD                   | TR |
| F01_cb9_c2/f1p0/2212-1F      | PHD                   | TR |
| F01_cb9_c3/f1p0/2562-0F      | PHD                   | TR |
| F01_cb9_c4/f1p0/2454-1F      | PHD                   | TR |
| F01_cb9_c5/f1p0/2249-0F      | PHD                   | TR |
| F01_cb10030_c23/f1p1/3564-0R | CMGC_CDK-CRK7-CDK9    | PK |
| F01_cb10096_c0/f4p0/1788-0F  | RLK-Pelle_RLCK-VIII   | PK |
| F01_cb10096_c7/f1p0/1710-2F  | RLK-Pelle_RLCK-VIII   | PK |
| F01_cb10096_c8/f1p0/1775-0F  | RLK-Pelle_RLCK-VIII   | PK |
| F01_cb10096_c8/f1p0/1775-1F  | RLK-Pelle_RLCK-VIII   | PK |
| F01_cb10135_c1/f2p0/1634-1F  | CMGC_CDK-CCRK         | PK |
| F01_cb10135_c3/f1p0/1799-2F  | CMGC_CDK-CCRK         | PK |
| F01_cb10266_c4/f1p0/2826-0F  | RLK-Pelle_RLCK-VIIa-2 | PK |
| F01_cb10266_c5/f1p0/1940-0F  | RLK-Pelle_RLCK-VIIa-2 | PK |

---

---

|                               |                       |    |
|-------------------------------|-----------------------|----|
| F01_cb10266_c6/f1p0/1904-1F   | RLK-Pelle_RLCK-VIIa-2 | PK |
| F01_cb10266_c7/f1p0/1776-1F   | RLK-Pelle_RLCK-VIIa-2 | PK |
| F01_cb10266_c8/f2p0/1770-1F   | RLK-Pelle_RLCK-VIIa-2 | PK |
| F01_cb1026_c0/f1p0/4508-2F    | RLK-Pelle_LRR-XIV     | PK |
| F01_cb1026_c3/f1p0/3846-2F    | RLK-Pelle_LRR-XIV     | PK |
| F01_cb10280_c0/f19p0/1256-1F  | CMGC_CDK-PI           | PK |
| F01_cb10280_c1/f1p0/2387-0F   | CMGC_CDK-PI           | PK |
| F01_cb10280_c1/f1p0/2387-1F   | CMGC_CDK-PI           | PK |
| F01_cb10280_c3/f1p0/1292-0F   | CMGC_CDK-PI           | PK |
| F01_cb10280_c4/f1p0/1445-0F   | CMGC_CDK-PI           | PK |
| F01_cb10280_c5/f1p0/1799-1F   | CMGC_CDK-PI           | PK |
| F01_cb10323_c2/f1p0/2774-1R   | RLK-Pelle_RLCK-XI     | PK |
| F01_cb10334_c0/f11p0/1199-1F  | CAMK_CDPK             | PK |
| F01_cb10334_c2/f2p0/966-2F    | CAMK_CDPK             | PK |
| F01_cb10334_c4/f1p0/2353-0F   | CAMK_CDPK             | PK |
| F01_cb10334_c6/f1p0/999-0F    | CAMK_CDPK             | PK |
| F01_cb10334_c7/f1p0/1022-0F   | CAMK_CDPK             | PK |
| F01_cb10452_c10/f1p0/1588-2F  | CAMK_OST1L            | PK |
| F01_cb10452_c12/f13p0/1712-1F | CAMK_OST1L            | PK |
| F01_cb10452_c3/f1p0/2040-1R   | CAMK_OST1L            | PK |
| F01_cb10452_c3/f1p0/2040-2F   | CAMK_OST1L            | PK |
| F01_cb10452_c7/f1p0/1508-1F   | CAMK_OST1L            | PK |
| F01_cb10452_c8/f1p0/1461-2F   | CAMK_OST1L            | PK |
| F01_cb10573_c0/f2p0/1782-0F   | Group-PI-4            | PK |
| F01_cb10688_c1/f6p2/1552-1F   | TKL-PI-4              | PK |
| F01_cb10688_c2/f1p2/1627-2F   | TKL-PI-4              | PK |

---

---

|                              |                     |    |
|------------------------------|---------------------|----|
| F01_cb10688_c3/flp1/2522-0F  | TKL-PI-4            | PK |
| F01_cb10688_c5/flp1/1076-2F  | TKL-PI-4            | PK |
| F01_cb10688_c6/flp1/1588-1F  | TKL-PI-4            | PK |
| F01_cb1069_c0/flp0/4487-0F   | ULK_ULK4            | PK |
| F01_cb1069_c0/flp0/4487-1F   | ULK_ULK4            | PK |
| F01_cb10705_c12/flp0/1220-2F | CAMK_CAMKL-CHK1     | PK |
| F01_cb10705_c14/flp0/1879-1F | CAMK_CAMKL-CHK1     | PK |
| F01_cb10705_c14/flp0/1879-2F | CAMK_CAMKL-CHK1     | PK |
| F01_cb10705_c17/f3p0/1800-2F | CAMK_CAMKL-CHK1     | PK |
| F01_cb1077_c13/flp0/2261-1F  | STE_STE11           | PK |
| F01_cb1077_c14/flp0/3474-0F  | STE_STE11           | PK |
| F01_cb1077_c27/flp0/3149-1F  | STE_STE11           | PK |
| F01_cb1077_c30/flp0/2226-0F  | STE_STE11           | PK |
| F01_cb1077_c32/flp0/2415-1F  | STE_STE11           | PK |
| F01_cb1077_c39/flp0/2520-2F  | STE_STE11           | PK |
| F01_cb1077_c44/flp1/2498-1F  | STE_STE11           | PK |
| F01_cb1077_c45/f6p0/2505-1F  | STE_STE11           | PK |
| F01_cb10821_c0/f2p1/1740-0F  | CMGC_MAPK           | PK |
| F01_cb10821_c2/flp0/1561-0F  | CMGC_MAPK           | PK |
| F01_cb10821_c3/flp0/1928-1F  | CMGC_MAPK           | PK |
| F01_cb10821_c6/flp1/1816-0F  | CMGC_MAPK           | PK |
| F01_cb10821_c6/flp1/1816-2F  | CMGC_MAPK           | PK |
| F01_cb10847_c1/flp0/2847-1F  | RLK-Pelle_CR4L      | PK |
| F01_cb10847_c2/flp0/1850-2F  | RLK-Pelle_CR4L      | PK |
| F01_cb10925_c2/flp0/2405-2R  | RLK-Pelle_LRR-XIIIa | PK |
| F01_cb10939_c0/f3p0/1637-2F  | RLK-Pelle_DLSV      | PK |

---

---

|                              |                     |    |
|------------------------------|---------------------|----|
| F01_cb10939_c1/f3p0/1721-1F  | RLK-Pelle_DLSV      | PK |
| F01_cb10939_c2/f1p0/2519-0F  | RLK-Pelle_DLSV      | PK |
| F01_cb10939_c2/f1p0/2519-1F  | RLK-Pelle_DLSV      | PK |
| F01_cb10939_c2/f1p0/2519-2F  | RLK-Pelle_DLSV      | PK |
| F01_cb10939_c3/f1p0/1565-2F  | RLK-Pelle_DLSV      | PK |
| F01_cb10939_c4/f1p0/1593-1F  | RLK-Pelle_DLSV      | PK |
| F01_cb10939_c5/f1p0/1684-2F  | RLK-Pelle_DLSV      | PK |
| F01_cb10939_c6/f1p0/5099-1F  | RLK-Pelle_DLSV      | PK |
| F01_cb10939_c6/f1p0/5099-2F  | RLK-Pelle_DLSV      | PK |
| F01_cb10965_c0/f3p0/1720-0F  | CMGC_GSK            | PK |
| F01_cb10965_c4/f1p1/1818-2F  | CMGC_GSK            | PK |
| F01_cb10965_c5/f1p0/1651-0F  | CMGC_GSK            | PK |
| F01_cb10965_c5/f1p0/1651-1F  | CMGC_GSK            | PK |
| F01_cb10989_c1/f9p1/2579-1F  | WNK_NRBP            | PK |
| F01_cb10989_c10/f1p0/3595-0F | WNK_NRBP            | PK |
| F01_cb10989_c11/f1p0/3363-2F | WNK_NRBP            | PK |
| F01_cb10989_c12/f1p0/3180-0F | WNK_NRBP            | PK |
| F01_cb10989_c12/f1p0/3180-1F | WNK_NRBP            | PK |
| F01_cb10989_c16/f1p1/2700-2F | WNK_NRBP            | PK |
| F01_cb10989_c17/f1p1/2555-0F | WNK_NRBP            | PK |
| F01_cb10989_c8/f1p0/3471-0F  | WNK_NRBP            | PK |
| F01_cb11079_c4/f1p0/1706-2F  | STE_STE7            | PK |
| F01_cb1107_c11/f1p0/6048-0F  | TKL-PI-2            | PK |
| F01_cb1107_c3/f1p0/4155-2F   | TKL-PI-2            | PK |
| F01_cb1107_c6/f1p0/4264-1F   | TKL-PI-2            | PK |
| F01_cb1110_c0/f5p2/1816-2F   | RLK-Pelle_RLCK-VIII | PK |

---

---

|                             |                       |    |
|-----------------------------|-----------------------|----|
| F01_cb1110_c11/f1p0/1830-1F | RLK-Pelle_RLCK-VIII   | PK |
| F01_cb1110_c13/f1p0/1784-0F | RLK-Pelle_RLCK-VIII   | PK |
| F01_cb1110_c13/f1p0/1784-1F | RLK-Pelle_RLCK-VIII   | PK |
| F01_cb1110_c21/f4p0/1704-2F | RLK-Pelle_RLCK-VIII   | PK |
| F01_cb1110_c23/f3p0/1698-0F | RLK-Pelle_RLCK-VIII   | PK |
| F01_cb1110_c7/f1p1/4474-0F  | RLK-Pelle_RLCK-VIII   | PK |
| F01_cb1110_c8/f1p0/2290-2F  | RLK-Pelle_RLCK-VIII   | PK |
| F01_cb1110_c9/f1p1/1847-1F  | RLK-Pelle_RLCK-VIII   | PK |
| F01_cb11232_c3/f1p0/2508-0R | CAMK_CDPK             | PK |
| F01_cb11247_c0/f2p0/1571-2F | RLK-Pelle_DLSV        | PK |
| F01_cb11247_c1/f1p0/2876-0F | RLK-Pelle_DLSV        | PK |
| F01_cb11247_c1/f1p0/2876-2F | RLK-Pelle_DLSV        | PK |
| F01_cb11272_c0/f1p0/1684-1F | RLK-Pelle_RLCK-VIIa-2 | PK |
| F01_cb11309_c1/f1p0/2641-0F | WNK_NRBP              | PK |
| F01_cb11309_c1/f1p0/2641-1F | WNK_NRBP              | PK |
| F01_cb11309_c2/f1p0/1295-0F | WNK_NRBP              | PK |
| F01_cb11309_c2/f1p0/1295-2F | WNK_NRBP              | PK |
| F01_cb11309_c4/f1p1/1476-2F | WNK_NRBP              | PK |
| F01_cb11355_c0/f2p0/1740-1F | RLK-Pelle_DLSV        | PK |
| F01_cb11355_c1/f1p0/2062-0F | RLK-Pelle_DLSV        | PK |
| F01_cb11355_c1/f1p0/2062-1F | RLK-Pelle_DLSV        | PK |
| F01_cb11355_c2/f1p0/1643-1F | RLK-Pelle_DLSV        | PK |
| F01_cb11388_c0/f1p0/1626-1F | RLK-Pelle_RLCK-VIIa-2 | PK |
| F01_cb1140_c11/f1p0/3479-0F | TKL_CTR1-DRK-2        | PK |
| F01_cb1140_c19/f1p0/2766-1F | TKL_CTR1-DRK-2        | PK |
| F01_cb1140_c2/f5p0/3323-1F  | TKL_CTR1-DRK-2        | PK |

---

---

|                              |                       |    |
|------------------------------|-----------------------|----|
| F01_cb1140_c24/flp0/3830-0F  | TKL_CTR1-DRK-2        | PK |
| F01_cb1140_c24/flp0/3830-1F  | TKL_CTR1-DRK-2        | PK |
| F01_cb1140_c28/flp0/3350-2F  | TKL_CTR1-DRK-2        | PK |
| F01_cb1140_c32/f8p2/3463-0F  | TKL_CTR1-DRK-2        | PK |
| F01_cb11577_c1/flp0/2827-0F  | RLK-Pelle_SD-2b       | PK |
| F01_cb11623_c0/flp0/1017-1F  | RLK-Pelle_RLCK-IV     | PK |
| F01_cb11623_c1/flp0/4995-0F  | RLK-Pelle_RLCK-IV     | PK |
| F01_cb11726_c1/flp0/2400-1R  | RLK-Pelle_RLCK-VIIa-1 | PK |
| F01_cb11726_c1/flp0/2400-2R  | RLK-Pelle_RLCK-VIIa-1 | PK |
| F01_cb11735_c1/flp0/3700-1F  | RLK-Pelle_LRR-VII-3   | PK |
| F01_cb11735_c1/flp0/3700-2F  | RLK-Pelle_LRR-VII-3   | PK |
| F01_cb11783_c0/flp0/1744-1F  | RLK-Pelle_LRR-I-2     | PK |
| F01_cb11783_c1/flp0/2369-0F  | RLK-Pelle_LRR-I-2     | PK |
| F01_cb11783_c1/flp0/2369-2F  | RLK-Pelle_LRR-I-2     | PK |
| F01_cb11785_c0/flp0/1852-0F  | RLK-Pelle_C-LEC       | PK |
| F01_cb11785_c1/flp0/1968-0F  | RLK-Pelle_C-LEC       | PK |
| F01_cb11813_c0/flp0/1690-0F  | RLK-Pelle_RLCK-VIIa-2 | PK |
| F01_cb11813_c1/flp0/2518-1F  | RLK-Pelle_RLCK-VIIa-2 | PK |
| F01_cb11813_c1/flp0/2518-2F  | RLK-Pelle_RLCK-VIIa-2 | PK |
| F01_cb12007_c0/f4p1/1721-2F  | RLK-Pelle_RLCK-IXb    | PK |
| F01_cb12007_c2/flp1/1781-1F  | RLK-Pelle_RLCK-IXb    | PK |
| F01_cb12007_c3/flp0/1215-0F  | RLK-Pelle_RLCK-IXb    | PK |
| F01_cb12007_c6/flp0/5755-0F  | RLK-Pelle_RLCK-IXb    | PK |
| F01_cb12076_c10/f6p0/1661-2F | CMGC_CK2              | PK |
| F01_cb12076_c2/f2p0/1546-0F  | CMGC_CK2              | PK |
| F01_cb12076_c3/flp0/1417-2F  | CMGC_CK2              | PK |

---

---

|                              |                    |    |
|------------------------------|--------------------|----|
| F01_cb12076_c4/flp0/1481-0F  | CMGC_CK2           | PK |
| F01_cb12076_c4/flp0/1481-2F  | CMGC_CK2           | PK |
| F01_cb12076_c8/flp0/1627-0F  | CMGC_CK2           | PK |
| F01_cb12076_c9/f4p0/1681-1F  | CMGC_CK2           | PK |
| F01_cb12094_c14/flp1/1757-0F | CMGC_GSK           | PK |
| F01_cb12094_c17/flp0/1812-2F | CMGC_GSK           | PK |
| F01_cb12094_c19/flp0/1865-0F | CMGC_GSK           | PK |
| F01_cb12094_c2/flp2/1816-1F  | CMGC_GSK           | PK |
| F01_cb12094_c20/flp0/1794-0F | CMGC_GSK           | PK |
| F01_cb12094_c22/flp1/1861-2F | CMGC_GSK           | PK |
| F01_cb12094_c23/flp0/1833-0F | CMGC_GSK           | PK |
| F01_cb12094_c34/flp1/1801-1F | CMGC_GSK           | PK |
| F01_cb12094_c35/f2p1/1660-1F | CMGC_GSK           | PK |
| F01_cb12239_c11/flp0/1168-2F | CAMK_OST1L         | PK |
| F01_cb12239_c12/flp1/1603-1F | CAMK_OST1L         | PK |
| F01_cb12239_c13/flp0/1266-0F | CAMK_OST1L         | PK |
| F01_cb12239_c15/flp0/1389-1F | CAMK_OST1L         | PK |
| F01_cb12239_c15/flp0/1389-2F | CAMK_OST1L         | PK |
| F01_cb12239_c16/flp0/1735-1F | CAMK_OST1L         | PK |
| F01_cb12239_c2/f2p1/1388-0F  | CAMK_OST1L         | PK |
| F01_cb12239_c3/flp1/1477-0F  | CAMK_OST1L         | PK |
| F01_cb12239_c4/flp0/1681-0F  | CAMK_OST1L         | PK |
| F01_cb12239_c4/flp0/1681-1F  | CAMK_OST1L         | PK |
| F01_cb12239_c5/flp0/1318-0F  | CAMK_OST1L         | PK |
| F01_cb12239_c8/flp0/1565-0F  | CAMK_OST1L         | PK |
| F01_cb12397_c0/flp0/788-1R   | RLK-Pelle_LRR-XI-1 | PK |

---

---

|                              |                     |    |
|------------------------------|---------------------|----|
| F01_cb12529_c10/f2p0/1762-2F | TKL-PI-4            | PK |
| F01_cb12529_c35/f1p0/1800-2F | TKL-PI-4            | PK |
| F01_cb12529_c5/f3p0/1846-0F  | TKL-PI-4            | PK |
| F01_cb12533_c0/f2p0/1634-2F  | TKL-PI-4            | PK |
| F01_cb12533_c1/f1p0/1665-1F  | TKL-PI-4            | PK |
| F01_cb12866_c3/f1p0/1872-0F  | RLK-Pelle_CR4L      | PK |
| F01_cb12866_c3/f1p0/1872-1F  | RLK-Pelle_CrRLK1L-1 | PK |
| F01_cb12866_c3/f1p0/1872-2F  | RLK-Pelle_CrRLK1L-1 | PK |
| F01_cb12_c10/f1p0/4331-1F    | STE_STE-PI          | PK |
| F01_cb12_c11/f1p2/4713-1F    | STE_STE-PI          | PK |
| F01_cb12_c15/f1p1/4774-1F    | STE_STE-PI          | PK |
| F01_cb12_c17/f1p0/4826-0F    | STE_STE-PI          | PK |
| F01_cb12_c21/f1p0/4378-0F    | STE_STE-PI          | PK |
| F01_cb12_c22/f1p0/4618-2F    | STE_STE-PI          | PK |
| F01_cb12_c24/f1p0/4291-2F    | STE_STE-PI          | PK |
| F01_cb12_c28/f1p0/4906-1F    | STE_STE-PI          | PK |
| F01_cb12_c29/f1p0/4185-2F    | STE_STE-PI          | PK |
| F01_cb12_c30/f1p2/4443-1F    | STE_STE-PI          | PK |
| F01_cb12_c35/f1p0/4696-1F    | STE_STE-PI          | PK |
| F01_cb12_c35/f1p0/4696-2F    | STE_STE-PI          | PK |
| F01_cb12_c40/f1p0/4680-1F    | STE_STE-PI          | PK |
| F01_cb12_c41/f1p0/4748-1F    | STE_STE-PI          | PK |
| F01_cb12_c45/f1p0/4319-2F    | STE_STE-PI          | PK |
| F01_cb12_c50/f1p0/4439-0F    | STE_STE-PI          | PK |
| F01_cb12_c54/f1p0/8058-1F    | STE_STE-PI          | PK |
| F01_cb12_c56/f1p0/6478-2F    | STE_STE-PI          | PK |

---



---

|                              |                 |    |
|------------------------------|-----------------|----|
| F01_cb12_c58/flp0/5377-0F    | STE_STE-PI      | PK |
| F01_cb12_c60/flp0/5175-2F    | STE_STE-PI      | PK |
| F01_cb12_c64/flp0/5051-2F    | STE_STE-PI      | PK |
| F01_cb1306_c0/fl1p2/3283-0F  | TKL_CTRL1-DRK-2 | PK |
| F01_cb1306_c1/f7p1/3196-0F   | TKL_CTRL1-DRK-2 | PK |
| F01_cb1306_c10/flp1/3298-0F  | TKL_CTRL1-DRK-2 | PK |
| F01_cb1306_c11/flp1/3048-2F  | TKL_CTRL1-DRK-2 | PK |
| F01_cb1306_c16/flp0/3008-1F  | TKL_CTRL1-DRK-2 | PK |
| F01_cb1306_c16/flp0/3008-2F  | TKL_CTRL1-DRK-2 | PK |
| F01_cb1306_c21/flp0/2970-1F  | TKL_CTRL1-DRK-2 | PK |
| F01_cb1306_c25/flp1/3130-0F  | TKL_CTRL1-DRK-2 | PK |
| F01_cb1306_c25/flp1/3130-1F  | TKL_CTRL1-DRK-2 | PK |
| F01_cb1306_c26/flp0/3118-1F  | TKL_CTRL1-DRK-2 | PK |
| F01_cb1306_c27/flp0/2865-1F  | TKL_CTRL1-DRK-2 | PK |
| F01_cb1306_c27/flp0/2865-2F  | TKL_CTRL1-DRK-2 | PK |
| F01_cb1306_c28/flp0/5943-1F  | TKL_CTRL1-DRK-2 | PK |
| F01_cb1306_c35/flp0/3110-1F  | TKL_CTRL1-DRK-2 | PK |
| F01_cb1306_c8/f2p2/3284-0F   | TKL_CTRL1-DRK-2 | PK |
| F01_cb1306_c9/flp1/4365-2F   | TKL_CTRL1-DRK-2 | PK |
| F01_cb1309_c0/f9p1/2646-0F   | STE_STE11       | PK |
| F01_cb1309_c1/flp0/2563-0F   | STE_STE11       | PK |
| F01_cb1309_c1/flp0/2563-1F   | STE_STE11       | PK |
| F01_cb13131_c0/fl1p0/1744-2F | CAMK_CAMKL-CHK1 | PK |
| F01_cb13131_c14/flp0/1395-2F | CAMK_CAMKL-CHK1 | PK |
| F01_cb13131_c17/flp0/1657-0F | CAMK_CAMKL-CHK1 | PK |
| F01_cb13131_c17/flp0/1657-1F | CAMK_CAMKL-CHK1 | PK |

---

---

|                              |                    |    |
|------------------------------|--------------------|----|
| F01_cb13131_c20/flp0/1870-2F | CAMK_CAMKL-CHK1    | PK |
| F01_cb13131_c21/flp0/1874-1F | CAMK_CAMKL-CHK1    | PK |
| F01_cb13131_c23/flp0/1651-2F | CAMK_CAMKL-CHK1    | PK |
| F01_cb13131_c26/flp0/1819-1F | CAMK_CAMKL-CHK1    | PK |
| F01_cb13131_c28/flp0/1654-1F | CAMK_CAMKL-CHK1    | PK |
| F01_cb13131_c34/flp1/1713-0F | CAMK_CAMKL-CHK1    | PK |
| F01_cb13131_c34/flp1/1713-1F | CAMK_CAMKL-CHK1    | PK |
| F01_cb1326_c10/flp0/3807-0F  | RLK-Pelle_LRR-Xb-1 | PK |
| F01_cb1326_c10/flp0/3807-1F  | RLK-Pelle_LRR-Xb-1 | PK |
| F01_cb1326_c13/flp1/4140-0F  | RLK-Pelle_LRR-Xb-1 | PK |
| F01_cb1326_c13/flp1/4140-2F  | RLK-Pelle_LRR-Xb-1 | PK |
| F01_cb1326_c20/flp0/2140-2F  | RLK-Pelle_LRR-Xb-1 | PK |
| F01_cb1326_c23/flp0/3133-2F  | RLK-Pelle_LRR-Xb-1 | PK |
| F01_cb1326_c24/flp0/4269-0F  | RLK-Pelle_LRR-Xb-1 | PK |
| F01_cb1326_c34/f5p1/4137-2F  | RLK-Pelle_LRR-Xb-1 | PK |
| F01_cb1326_c5/flp0/4374-0F   | RLK-Pelle_LRR-Xb-1 | PK |
| F01_cb1326_c9/flp0/3549-1F   | RLK-Pelle_LRR-Xb-1 | PK |
| F01_cb13288_c1/flp0/1622-2F  | CMGC_GSK           | PK |
| F01_cb13288_c2/flp0/1761-0F  | CMGC_GSK           | PK |
| F01_cb13288_c3/flp0/1730-1F  | CMGC_GSK           | PK |
| F01_cb13288_c5/flp0/1812-1F  | CMGC_GSK           | PK |
| F01_cb13288_c6/flp0/727-1F   | CMGC_GSK           | PK |
| F01_cb13311_c0/f2p0/1319-2F  | STE_STE7           | PK |
| F01_cb13311_c4/flp0/1310-1F  | STE_STE7           | PK |
| F01_cb13311_c5/flp0/1585-0F  | STE_STE7           | PK |
| F01_cb13437_c4/flp0/1747-0F  | RLK-Pelle_DLSV     | PK |

---

---

|                             |                       |    |
|-----------------------------|-----------------------|----|
| F01_cb1346_c6/flp0/4350-0R  | RLK-Pelle_CR4L        | PK |
| F01_cb13495_c0/flp0/1252-0F | RLK-Pelle_LRR-XI-1    | PK |
| F01_cb13495_c1/flp1/1287-2F | RLK-Pelle_LRR-XI-1    | PK |
| F01_cb13496_c0/f4p0/1760-1F | RLK-Pelle_RLCK-VIIa-2 | PK |
| F01_cb13496_c2/flp0/1741-1F | RLK-Pelle_RLCK-VIIa-2 | PK |
| F01_cb13496_c4/flp0/1831-0F | RLK-Pelle_RLCK-VIIa-2 | PK |
| F01_cb13496_c5/flp0/1776-2F | RLK-Pelle_RLCK-VIIa-2 | PK |
| F01_cb13624_c0/f2p0/1436-0F | RLK-Pelle_DLSV        | PK |
| F01_cb13624_c1/flp0/893-2F  | RLK-Pelle_DLSV        | PK |
| F01_cb13624_c2/flp0/1538-1F | RLK-Pelle_LRR-Xb-1    | PK |
| F01_cb13624_c3/flp0/1519-0F | RLK-Pelle_DLSV        | PK |
| F01_cb13624_c4/flp0/1613-0F | RLK-Pelle_DLSV        | PK |
| F01_cb13661_c3/flp0/1743-0F | TKL-PI-5              | PK |
| F01_cb13661_c3/flp0/1743-1F | TKL-PI-5              | PK |
| F01_cb13661_c3/flp0/1743-2F | TKL-PI-5              | PK |
| F01_cb140_c1/f2p0/5012-2F   | CMGC_Pi-Tthe          | PK |
| F01_cb140_c2/f2p0/4887-1F   | CMGC_Pi-Tthe          | PK |
| F01_cb140_c3/flp0/4949-1F   | CMGC_Pi-Tthe          | PK |
| F01_cb14168_c0/flp0/1816-1F | RLK-Pelle_LysM        | PK |
| F01_cb14536_c0/f4p0/1758-2F | RLK-Pelle_RLCK-VIIa-2 | PK |
| F01_cb14536_c1/flp0/1824-1F | RLK-Pelle_RLCK-VIIa-2 | PK |
| F01_cb14536_c2/flp0/1447-2F | RLK-Pelle_RLCK-VIIa-2 | PK |
| F01_cb1453_c10/flp0/3066-2F | RLK-Pelle_LRR-I-1     | PK |
| F01_cb1453_c13/flp1/2563-0F | RLK-Pelle_LRR-I-1     | PK |
| F01_cb1453_c14/flp0/2699-2F | RLK-Pelle_LRR-I-1     | PK |
| F01_cb1453_c2/f2p0/3081-0F  | RLK-Pelle_LRR-I-1     | PK |

---

---

|                             |                     |    |
|-----------------------------|---------------------|----|
| F01_cb1453_c2/f2p0/3081-1F  | RLK-Pelle_LRR-I-1   | PK |
| F01_cb1453_c4/f1p0/2990-2F  | RLK-Pelle_LRR-I-1   | PK |
| F01_cb1453_c5/f1p0/3040-1F  | RLK-Pelle_LRR-I-1   | PK |
| F01_cb1453_c6/f1p0/4435-1F  | RLK-Pelle_LRR-I-1   | PK |
| F01_cb1453_c8/f1p0/3087-0F  | RLK-Pelle_LRR-I-1   | PK |
| F01_cb1453_c8/f1p0/3087-1F  | RLK-Pelle_LRR-I-1   | PK |
| F01_cb1453_c9/f1p0/3235-2F  | RLK-Pelle_LRR-I-1   | PK |
| F01_cb14552_c1/f1p0/1806-0F | RLK-Pelle_WAK       | PK |
| F01_cb14552_c3/f1p0/1689-1F | RLK-Pelle_WAK       | PK |
| F01_cb14600_c3/f1p1/1346-2F | WNK_NRBP            | PK |
| F01_cb14672_c1/f1p0/1126-2F | TKL-PI-4            | PK |
| F01_cb14672_c2/f1p0/1303-1F | TKL-PI-4            | PK |
| F01_cb14683_c0/f2p0/1748-1F | RLK-Pelle_RLCK-VI   | PK |
| F01_cb14683_c1/f1p0/1744-0F | RLK-Pelle_RLCK-VI   | PK |
| F01_cb1468_c0/f7p1/2932-0F  | STE_STE11           | PK |
| F01_cb1468_c1/f4p2/2905-2F  | STE_STE11           | PK |
| F01_cb1468_c12/f1p1/3132-0F | STE_STE11           | PK |
| F01_cb1468_c3/f1p0/4312-0F  | STE_STE11           | PK |
| F01_cb1468_c4/f1p2/2897-1F  | STE_STE11           | PK |
| F01_cb1468_c7/f1p1/3360-0F  | STE_STE11           | PK |
| F01_cb1468_c8/f1p0/2956-2F  | STE_STE11           | PK |
| F01_cb1468_c9/f1p1/2963-0F  | STE_STE11           | PK |
| F01_cb1469_c18/f1p0/3487-2F | RLK-Pelle_LRR-VII-1 | PK |
| F01_cb1469_c21/f1p0/3647-1F | RLK-Pelle_LRR-VII-1 | PK |
| F01_cb1469_c31/f8p2/3549-1F | RLK-Pelle_LRR-VII-1 | PK |
| F01_cb1469_c36/f1p0/1214-0F | RLK-Pelle_LRR-VII-1 | PK |

---

---

|                              |                       |    |
|------------------------------|-----------------------|----|
| F01_cb1469_c6/f2p2/3648-0F   | RLK-Pelle_LRR-VII-1   | PK |
| F01_cb14704_c12/f1p0/2420-0F | RLK-Pelle_RLCK-II     | PK |
| F01_cb14704_c13/f1p0/2410-1F | RLK-Pelle_RLCK-II     | PK |
| F01_cb14704_c15/f1p1/2401-1F | RLK-Pelle_RLCK-II     | PK |
| F01_cb14704_c18/f1p0/2184-0F | RLK-Pelle_RLCK-II     | PK |
| F01_cb14704_c19/f1p1/5793-1F | RLK-Pelle_RLCK-II     | PK |
| F01_cb14704_c29/f1p0/5601-1F | RLK-Pelle_RLCK-II     | PK |
| F01_cb14806_c1/f1p0/1602-1F  | AGC_RSK-2             | PK |
| F01_cb14806_c2/f1p0/1357-1F  | AGC_RSK-2             | PK |
| F01_cb1482_c0/f3p1/4124-0F   | TKL_CTR1-DRK-2        | PK |
| F01_cb1482_c1/f1p0/4095-0F   | TKL_CTR1-DRK-2        | PK |
| F01_cb1482_c4/f1p1/4863-2F   | TKL_CTR1-DRK-2        | PK |
| F01_cb1482_c5/f1p1/4141-0F   | TKL_CTR1-DRK-2        | PK |
| F01_cb1482_c5/f1p1/4141-2F   | TKL_CTR1-DRK-2        | PK |
| F01_cb1482_c6/f1p1/3871-1F   | TKL_CTR1-DRK-2        | PK |
| F01_cb1482_c7/f1p1/3492-1F   | TKL_CTR1-DRK-2        | PK |
| F01_cb15071_c0/f6p0/1717-1F  | RLK-Pelle_RLCK-VIIa-2 | PK |
| F01_cb15071_c2/f2p0/1680-0F  | RLK-Pelle_RLCK-VIIa-2 | PK |
| F01_cb15071_c3/f1p0/1820-2F  | RLK-Pelle_RLCK-VIIa-2 | PK |
| F01_cb15071_c5/f1p0/1763-1F  | RLK-Pelle_RLCK-VIIa-2 | PK |
| F01_cb15077_c0/f1p0/1511-1F  | RLK-Pelle_RLCK-VIIa-2 | PK |
| F01_cb15077_c1/f1p0/1683-0F  | RLK-Pelle_RLCK-VIIa-2 | PK |
| F01_cb151_c2/f1p0/4262-0F    | TKL-PI-6              | PK |
| F01_cb151_c2/f1p0/4262-2F    | TKL-PI-6              | PK |
| F01_cb151_c3/f1p1/4867-0F    | TKL-PI-6              | PK |
| F01_cb151_c3/f1p1/4867-1F    | TKL-PI-6              | PK |

---

---

|                             |                        |    |
|-----------------------------|------------------------|----|
| F01_cb151_c4/flp0/4653-0F   | TKL-PI-6               | PK |
| F01_cb151_c6/flp0/4591-0F   | TKL-PI-6               | PK |
| F01_cb151_c6/flp0/4591-1F   | TKL-PI-6               | PK |
| F01_cb151_c6/flp0/4591-2F   | TKL-PI-6               | PK |
| F01_cb151_c7/flp0/4348-1F   | TKL-PI-6               | PK |
| F01_cb15250_c0/f2p0/1673-1F | CMGC_MAPK              | PK |
| F01_cb15250_c1/flp0/1709-0F | CMGC_MAPK              | PK |
| F01_cb15276_c1/flp0/1292-0F | RLK-Pelle_URK-1        | PK |
| F01_cb15276_c2/flp0/1105-2F | RLK-Pelle_URK-1        | PK |
| F01_cb15276_c3/flp0/1318-0F | RLK-Pelle_URK-1        | PK |
| F01_cb15285_c1/flp1/1724-0F | STE_STE7               | PK |
| F01_cb15462_c2/flp0/527-0R  | RLK-Pelle_WAK_LRK10L-1 | PK |
| F01_cb15588_c2/flp0/1647-0F | RLK-Pelle_PERK-1       | PK |
| F01_cb15588_c3/flp0/1471-1F | RLK-Pelle_PERK-1       | PK |
| F01_cb1573_c15/flp0/3869-0F | CMGC_DYRK-YAK          | PK |
| F01_cb1573_c16/flp0/3454-0F | CMGC_DYRK-YAK          | PK |
| F01_cb1573_c17/flp1/3566-1F | CMGC_DYRK-YAK          | PK |
| F01_cb1573_c18/flp0/3817-1F | CMGC_DYRK-YAK          | PK |
| F01_cb1573_c18/flp0/3817-2F | CMGC_DYRK-YAK          | PK |
| F01_cb1573_c19/flp1/3913-0F | CMGC_DYRK-YAK          | PK |
| F01_cb1573_c20/flp0/3450-0F | CMGC_DYRK-YAK          | PK |
| F01_cb1573_c21/flp2/3728-2F | CMGC_DYRK-YAK          | PK |
| F01_cb1573_c23/flp1/3875-1F | CMGC_DYRK-YAK          | PK |
| F01_cb1573_c24/flp1/3680-0F | CMGC_DYRK-YAK          | PK |
| F01_cb1573_c24/flp1/3680-2F | CMGC_DYRK-YAK          | PK |
| F01_cb1573_c3/f4p1/3618-2F  | CMGC_DYRK-YAK          | PK |

---

---

|                              |                       |    |
|------------------------------|-----------------------|----|
| F01_cb1573_c32/f1p0/2936-1F  | CMGC_DYRK-YAK         | PK |
| F01_cb1573_c35/f1p0/2689-0F  | CMGC_DYRK-YAK         | PK |
| F01_cb1573_c41/f1p0/1724-0F  | CMGC_DYRK-YAK         | PK |
| F01_cb1573_c7/f1p2/3841-1F   | CMGC_DYRK-YAK         | PK |
| F01_cb1573_c9/f2p0/3382-1F   | CMGC_DYRK-YAK         | PK |
| F01_cb15873_c3/f1p0/880-1F   | CAMK_CDPK             | PK |
| F01_cb15877_c0/f1p0/1393-2F  | RLK-Pelle_RLCK-VIIa-2 | PK |
| F01_cb16046_c0/f2p0/1662-0F  | RLK-Pelle_RLCK-VIIa-2 | PK |
| F01_cb16046_c1/f1p0/1813-0F  | RLK-Pelle_RLCK-VIIa-2 | PK |
| F01_cb16046_c1/f1p0/1813-2F  | RLK-Pelle_RLCK-VIIa-2 | PK |
| F01_cb16081_c1/f4p1/1595-1F  | RLK-Pelle_RLCK-XV     | PK |
| F01_cb16081_c2/f3p1/1402-2F  | RLK-Pelle_RLCK-XV     | PK |
| F01_cb16081_c3/f2p0/1740-2F  | RLK-Pelle_RLCK-XV     | PK |
| F01_cb16081_c9/f5p1/1786-0F  | RLK-Pelle_RLCK-XV     | PK |
| F01_cb1608_c0/f2p1/3657-2F   | RLK-Pelle_LRR-III     | PK |
| F01_cb1608_c2/f1p1/3631-0F   | RLK-Pelle_LRR-III     | PK |
| F01_cb1608_c4/f1p0/3531-0F   | RLK-Pelle_LRR-III     | PK |
| F01_cb16090_c1/f1p0/1134-0F  | RLK-Pelle_L-LEC       | PK |
| F01_cb16132_c18/f1p1/1756-0F | CAMK_CAMKL-CHK1       | PK |
| F01_cb16132_c18/f1p1/1756-1F | CAMK_CAMKL-CHK1       | PK |
| F01_cb16132_c23/f1p2/1726-0F | CAMK_CAMKL-CHK1       | PK |
| F01_cb16132_c27/f1p1/1796-2F | CAMK_CAMKL-CHK1       | PK |
| F01_cb16132_c31/f1p0/1829-2F | CAMK_CAMKL-CHK1       | PK |
| F01_cb16132_c36/f1p1/1828-1F | CAMK_CAMKL-CHK1       | PK |
| F01_cb16134_c2/f1p0/1632-0F  | RLK-Pelle_DLSV        | PK |
| F01_cb16299_c1/f1p0/1885-2F  | RLK-Pelle_RLCK-VIIa-2 | PK |

---

---

|                             |                       |    |
|-----------------------------|-----------------------|----|
| F01_cb16299_c3/flp0/1697-2F | RLK-Pelle_RLCK-VIIa-2 | PK |
| F01_cb16299_c4/flp0/1771-2F | RLK-Pelle_RLCK-VIIa-2 | PK |
| F01_cb16299_c6/flp1/1757-0F | RLK-Pelle_RLCK-VIIa-2 | PK |
| F01_cb16299_c6/flp1/1757-2F | RLK-Pelle_RLCK-VIIa-2 | PK |
| F01_cb16299_c8/f3p1/5415-1F | RLK-Pelle_RLCK-VIIa-2 | PK |
| F01_cb16344_c0/f3p0/1511-1F | RLK-Pelle_DLSV        | PK |
| F01_cb16344_c2/flp0/1585-1F | RLK-Pelle_DLSV        | PK |
| F01_cb16361_c1/f2p0/1778-2F | RLK-Pelle_RLCK-VIIa-2 | PK |
| F01_cb16430_c1/flp0/1766-0F | CK1_CK1               | PK |
| F01_cb16488_c2/f2p0/1570-1F | RLK-Pelle_RLCK-VIII   | PK |
| F01_cb16488_c8/flp0/1732-1F | RLK-Pelle_RLCK-VIII   | PK |
| F01_cb16488_c9/flp0/1566-2F | RLK-Pelle_RLCK-VIII   | PK |
| F01_cb16508_c0/flp0/1682-0F | RLK-Pelle_RLCK-XV     | PK |
| F01_cb16508_c1/flp0/1732-0F | RLK-Pelle_RLCK-XV     | PK |
| F01_cb16508_c2/flp0/1556-1F | RLK-Pelle_RLCK-XV     | PK |
| F01_cb1654_c0/f2p0/4227-0F  | RLK-Pelle_LRR-XII-1   | PK |
| F01_cb1654_c2/flp0/3835-0F  | RLK-Pelle_LRR-XII-1   | PK |
| F01_cb16744_c2/flp0/1530-0F | RLK-Pelle_RLCK-VIIa-2 | PK |
| F01_cb16744_c3/flp0/1625-2F | RLK-Pelle_RLCK-VIIa-2 | PK |
| F01_cb16817_c2/flp0/1493-1F | CAMK_OST1L            | PK |
| F01_cb16817_c3/flp0/1693-1F | CAMK_OST1L            | PK |
| F01_cb16817_c4/flp0/1658-1F | CAMK_OST1L            | PK |
| F01_cb16830_c0/f3p0/1253-0F | STE_STE11             | PK |
| F01_cb16907_c0/f2p1/1856-1F | CMGC_MAPK             | PK |
| F01_cb16907_c0/f2p1/1856-2F | CMGC_MAPK             | PK |
| F01_cb16907_c3/flp0/1849-0F | CMGC_MAPK             | PK |

---



---

|                             |                       |    |
|-----------------------------|-----------------------|----|
| F01_cb16907_c3/flp0/1849-2F | CMGC_MAPK             | PK |
| F01_cb16907_c5/flp0/1573-0F | CMGC_MAPK             | PK |
| F01_cb16907_c5/flp0/1573-2F | CMGC_MAPK             | PK |
| F01_cb16970_c5/flp0/1759-2F | STE_STE7              | PK |
| F01_cb16970_c7/flp0/5657-0F | STE_STE7              | PK |
| F01_cb16970_c7/flp0/5657-2F | STE_STE7              | PK |
| F01_cb16974_c1/flp2/1758-2F | RLK-Pelle_RLCK-V      | PK |
| F01_cb16974_c2/flp1/1739-1F | RLK-Pelle_RLCK-V      | PK |
| F01_cb16974_c3/flp0/1764-1F | RLK-Pelle_RLCK-V      | PK |
| F01_cb17001_c0/f3p1/1878-1F | RLK-Pelle_RLCK-VIIa-2 | PK |
| F01_cb1701_c1/f2p1/3968-2F  | AGC_MAST              | PK |
| F01_cb1701_c2/flp0/4012-2F  | AGC_MAST              | PK |
| F01_cb1701_c5/flp0/3219-0F  | AGC_MAST              | PK |
| F01_cb1701_c6/flp0/3989-0F  | AGC_MAST              | PK |
| F01_cb1701_c7/flp0/4121-1F  | AGC_MAST              | PK |
| F01_cb17086_c0/flp0/1379-1F | RLK-Pelle_CR4L        | PK |
| F01_cb17086_c1/flp0/1418-0F | RLK-Pelle_RLCK-VIIa-2 | PK |
| F01_cb1714_c0/f2p0/4139-2F  | RLK-Pelle_LRR-XI-1    | PK |
| F01_cb1714_c1/f2p1/4137-2F  | RLK-Pelle_LRR-XI-1    | PK |
| F01_cb1714_c2/flp0/4405-1F  | RLK-Pelle_LRR-XI-1    | PK |
| F01_cb1714_c8/flp0/1554-1F  | RLK-Pelle_LRR-XI-1    | PK |
| F01_cb17293_c0/f2p0/1765-0F | RLK-Pelle_DLSV        | PK |
| F01_cb17293_c1/flp0/1774-0F | RLK-Pelle_DLSV        | PK |
| F01_cb17293_c3/flp0/1593-0F | RLK-Pelle_DLSV        | PK |
| F01_cb17378_c1/flp1/1845-1F | STE_STE7              | PK |
| F01_cb17378_c2/flp0/1207-2F | STE_STE7              | PK |

---

---

|                             |                     |    |
|-----------------------------|---------------------|----|
| F01_cb17397_c0/flp0/1631-2F | CMGC_MAPK           | PK |
| F01_cb17397_c1/flp0/1744-0F | CMGC_MAPK           | PK |
| F01_cb17397_c2/flp0/5709-2F | CMGC_MAPK           | PK |
| F01_cb17397_c3/flp0/2619-0F | CMGC_MAPK           | PK |
| F01_cb17397_c4/flp0/2269-1F | CMGC_MAPK           | PK |
| F01_cb17397_c4/flp0/2269-2F | CMGC_MAPK           | PK |
| F01_cb17397_c5/flp1/1634-1F | CMGC_MAPK           | PK |
| F01_cb17397_c7/flp1/1566-2F | CMGC_MAPK           | PK |
| F01_cb17397_c8/flp0/1505-0F | CMGC_MAPK           | PK |
| F01_cb17397_c9/flp1/1416-2F | CMGC_MAPK           | PK |
| F01_cb17428_c1/flp0/1642-1F | RLK-Pelle_LRR-II    | PK |
| F01_cb1778_c11/flp1/2906-2F | RLK-Pelle_LRR-IX    | PK |
| F01_cb1778_c14/flp0/3718-2F | RLK-Pelle_LRR-IX    | PK |
| F01_cb1778_c17/flp0/3447-2F | RLK-Pelle_LRR-IX    | PK |
| F01_cb1778_c3/flp0/4178-0F  | RLK-Pelle_LRR-IX    | PK |
| F01_cb1778_c7/flp1/3671-1F  | RLK-Pelle_LRR-IX    | PK |
| F01_cb1778_c8/flp1/3002-1F  | RLK-Pelle_LRR-IX    | PK |
| F01_cb1780_c13/flp0/725-0F  | RLK-Pelle_LRR-XIIIa | PK |
| F01_cb1780_c2/flp0/4547-0F  | RLK-Pelle_LRR-XV    | PK |
| F01_cb1780_c4/flp1/4362-2F  | RLK-Pelle_LRR-XV    | PK |
| F01_cb1780_c7/flp1/2237-2F  | RLK-Pelle_LRR-XV    | PK |
| F01_cb1782_c1/f2p0/2023-1F  | CMGC_RCK            | PK |
| F01_cb1782_c2/flp0/4177-1F  | CMGC_RCK            | PK |
| F01_cb1782_c3/flp0/3452-0F  | CMGC_RCK            | PK |
| F01_cb1782_c4/flp0/4087-0F  | CMGC_RCK            | PK |
| F01_cb1782_c4/flp0/4087-2F  | CMGC_RCK            | PK |

---

---

|                              |                       |    |
|------------------------------|-----------------------|----|
| F01_cb1782_c6/flp0/2143-0F   | CMGC_RCK              | PK |
| F01_cb1782_c7/flp0/1946-2F   | CMGC_RCK              | PK |
| F01_cb1782_c8/flp0/2255-0F   | CMGC_RCK              | PK |
| F01_cb17859_c0/flp0/1025-1F  | RLK-Pelle_RLCK-VIIa-2 | PK |
| F01_cb17859_c2/flp0/1454-1F  | RLK-Pelle_RLCK-VIIa-2 | PK |
| F01_cb17896_c2/flp0/5746-0F  | RLK-Pelle_DLSV        | PK |
| F01_cb17896_c2/flp0/5746-2F  | RLK-Pelle_DLSV        | PK |
| F01_cb17896_c3/flp1/5521-2F  | RLK-Pelle_DLSV        | PK |
| F01_cb17896_c4/flp1/5406-0F  | RLK-Pelle_DLSV        | PK |
| F01_cb17973_c17/flp0/1407-1F | Group-Pl-3            | PK |
| F01_cb17973_c17/flp0/1407-2F | Group-Pl-3            | PK |
| F01_cb17973_c33/flp0/1278-1F | Group-Pl-3            | PK |
| F01_cb17973_c33/flp0/1278-2F | Group-Pl-3            | PK |
| F01_cb18079_c0/f2p0/1626-2F  | RLK-Pelle_Extensin    | PK |
| F01_cb18144_c0/f2p0/1467-0F  | RLK-Pelle_RLCK-VIIa-2 | PK |
| F01_cb18144_c2/flp0/1453-1F  | RLK-Pelle_RLCK-VIIa-2 | PK |
| F01_cb18288_c1/flp0/1746-1F  | RLK-Pelle_LRR-Xa      | PK |
| F01_cb18288_c2/flp0/1450-1F  | RLK-Pelle_LRR-Xa      | PK |
| F01_cb18332_c2/flp1/1832-1F  | RLK-Pelle_CrRLK1L-1   | PK |
| F01_cb18332_c3/flp2/1665-0F  | RLK-Pelle_RLCK-VIII   | PK |
| F01_cb18332_c6/flp0/1841-0F  | RLK-Pelle_RLCK-VIII   | PK |
| F01_cb18332_c7/flp2/1609-0F  | RLK-Pelle_RLCK-VIII   | PK |
| F01_cb18332_c8/flp1/1670-1F  | RLK-Pelle_RLCK-VIII   | PK |
| F01_cb18332_c9/flp0/1604-0F  | RLK-Pelle_RLCK-VIII   | PK |
| F01_cb18372_c1/f2p0/2056-1F  | RLK-Pelle_LRK10L-2    | PK |
| F01_cb18372_c11/flp0/4185-0F | RLK-Pelle_LRK10L-2    | PK |

---

---

|                                |                    |    |
|--------------------------------|--------------------|----|
| F01_cb18372_c13/flp0/2046-1F   | RLK-Pelle_LRK10L-2 | PK |
| F01_cb18372_c14/flp0/2197-0F   | RLK-Pelle_LRK10L-2 | PK |
| F01_cb18372_c14/flp0/2197-1F   | RLK-Pelle_LRK10L-2 | PK |
| F01_cb18372_c14/flp0/2197-2F   | RLK-Pelle_LRK10L-2 | PK |
| F01_cb18372_c17/flp0/2038-0F   | RLK-Pelle_LRK10L-2 | PK |
| F01_cb18372_c18/flp0/2238-2F   | RLK-Pelle_LRK10L-2 | PK |
| F01_cb18372_c19/flp0/2121-2F   | RLK-Pelle_LRK10L-2 | PK |
| F01_cb18372_c2/f2p0/2027-2F    | RLK-Pelle_LRK10L-2 | PK |
| F01_cb18372_c20/flp0/2079-0F   | RLK-Pelle_LRK10L-2 | PK |
| F01_cb18372_c21/flp0/2218-2F   | RLK-Pelle_LRK10L-2 | PK |
| F01_cb18372_c24/flp0/2094-1F   | RLK-Pelle_LRK10L-2 | PK |
| F01_cb18372_c6/flp0/1942-0F    | RLK-Pelle_LRK10L-2 | PK |
| F01_cb18372_c7/flp0/5609-2F    | RLK-Pelle_LRK10L-2 | PK |
| F01_cb18372_c8/flp0/2774-2F    | RLK-Pelle_LRK10L-2 | PK |
| F01_cb18386_c4/flp1/1388-1F    | TKL-PI-4           | PK |
| F01_cb18386_c5/flp0/1465-0F    | TKL-PI-4           | PK |
| F01_cb18386_c7/flp0/1299-2F    | TKL-PI-4           | PK |
| F01_cb18456_c7551/flp0/1750-0F | CAMK_CDPK          | PK |
| F01_cb18456_c7552/flp0/1784-1F | CAMK_CDPK          | PK |
| F01_cb18456_c7580/flp0/1737-0F | CAMK_AMPK          | PK |
| F01_cb1857_c1/f2p0/3686-1F     | AGC_RSK-2          | PK |
| F01_cb1857_c1/f2p0/3686-2F     | AGC_RSK-2          | PK |
| F01_cb1857_c13/flp0/3399-0F    | AGC_RSK-2          | PK |
| F01_cb1857_c13/flp0/3399-2F    | AGC_RSK-2          | PK |
| F01_cb1857_c15/flp0/3661-0F    | AGC_RSK-2          | PK |
| F01_cb1857_c18/flp0/3189-2F    | AGC_RSK-2          | PK |

---

---

|                              |                       |    |
|------------------------------|-----------------------|----|
| F01_cb1857_c25/flp0/3413-1F  | AGC_RSK-2             | PK |
| F01_cb1857_c4/f2p0/3275-0F   | AGC_RSK-2             | PK |
| F01_cb1857_c7/flp0/3508-2F   | AGC_RSK-2             | PK |
| F01_cb1857_c8/flp1/3635-0F   | AGC_RSK-2             | PK |
| F01_cb1857_c8/flp1/3635-1F   | AGC_RSK-2             | PK |
| F01_cb1857_c9/flp0/3585-0F   | AGC_RSK-2             | PK |
| F01_cb1857_c9/flp0/3585-2F   | AGC_RSK-2             | PK |
| F01_cb18616_c3/flp1/5034-0F  | RLK-Pelle_LRR-XI-1    | PK |
| F01_cb18616_c3/flp1/5034-2F  | RLK-Pelle_LRR-XI-1    | PK |
| F01_cb18621_c0/flp0/6004-0F  | RLK-Pelle_DLSV        | PK |
| F01_cb18621_c0/flp0/6004-1F  | RLK-Pelle_DLSV        | PK |
| F01_cb18621_c0/flp0/6004-2F  | RLK-Pelle_DLSV        | PK |
| F01_cb18634_c2/flp0/5092-2F  | RLK-Pelle_CrRLK1L-1   | PK |
| F01_cb18647_c0/flp0/4880-0F  | RLK-Pelle_CrRLK1L-1   | PK |
| F01_cb18647_c0/flp0/4880-1F  | RLK-Pelle_RLCK-VIIa-2 | PK |
| F01_cb18663_c0/flp0/8486-0F  | CMGC_CDK-PITSLRE      | PK |
| F01_cb18663_c2/flp1/7161-2F  | CMGC_CDK-PITSLRE      | PK |
| F01_cb18688_c0/flp0/5088-1F  | CMGC_MAPK             | PK |
| F01_cb18773_c0/f2p3/5493-0F  | CMGC_CDKL-Cr          | PK |
| F01_cb18773_c10/flp3/5620-2F | CMGC_Pl-Tthe          | PK |
| F01_cb18773_c6/flp1/5702-0F  | CMGC_CDKL-Cr          | PK |
| F01_cb18773_c9/flp0/6228-1F  | CMGC_CDKL-Cr          | PK |
| F01_cb18783_c0/flp0/5398-2F  | CAMK_CAMKL-CHK1       | PK |
| F01_cb187_c10/flp0/2688-1F   | AGC_PKA-PKG           | PK |
| F01_cb187_c11/flp1/3861-2F   | AGC_PKA-PKG           | PK |
| F01_cb187_c14/flp0/2733-0F   | AGC_PKA-PKG           | PK |

---

---

|                             |                       |    |
|-----------------------------|-----------------------|----|
| F01_cb187_c15/flp0/4178-0F  | AGC_PKA-PKG           | PK |
| F01_cb187_c17/flp0/4037-1F  | AGC_PKA-PKG           | PK |
| F01_cb187_c18/flp0/4376-0F  | AGC_PKA-PKG           | PK |
| F01_cb187_c21/flp0/4068-1F  | AGC_PKA-PKG           | PK |
| F01_cb187_c5/flp0/3727-0F   | AGC_PKA-PKG           | PK |
| F01_cb187_c6/f9p1/4066-1F   | AGC_PKA-PKG           | PK |
| F01_cb187_c7/flp0/4521-0F   | AGC_PKA-PKG           | PK |
| F01_cb187_c9/flp0/4217-0F   | AGC_PKA-PKG           | PK |
| F01_cb18802_c1/flp0/5282-1F | RLK-Pelle_LRR-XI-1    | PK |
| F01_cb18802_c2/flp0/5074-0F | RLK-Pelle_LRR-XI-1    | PK |
| F01_cb18802_c3/flp0/5057-0F | RLK-Pelle_LRR-XI-1    | PK |
| F01_cb18808_c1/flp0/5276-0F | STE_STE11             | PK |
| F01_cb18808_c1/flp0/5276-1F | STE_STE11             | PK |
| F01_cb18808_c2/flp0/5842-0F | STE_STE11             | PK |
| F01_cb18808_c2/flp0/5842-2F | STE_STE11             | PK |
| F01_cb18810_c0/flp1/6058-0F | RLK-Pelle_RLCK-VIIa-2 | PK |
| F01_cb18810_c0/flp1/6058-1F | RLK-Pelle_CrRLK1L-1   | PK |
| F01_cb18810_c1/flp0/5070-0F | RLK-Pelle_RLCK-VIIa-2 | PK |
| F01_cb18810_c1/flp0/5070-0R | RLK-Pelle_CrRLK1L-1   | PK |
| F01_cb18810_c1/flp0/5070-1F | RLK-Pelle_CrRLK1L-1   | PK |
| F01_cb18810_c1/flp0/5070-2R | RLK-Pelle_RLCK-VIIa-2 | PK |
| F01_cb18819_c0/flp0/5048-0F | TKL-PI-6              | PK |
| F01_cb18819_c2/flp0/5197-0F | TKL-PI-6              | PK |
| F01_cb18819_c2/flp0/5197-1F | TKL-PI-6              | PK |
| F01_cb18839_c0/flp0/5272-0F | RLK-Pelle_DLSV        | PK |
| F01_cb1897_c3/flp0/4130-2F  | RLK-Pelle_LRR-XI-1    | PK |

---

---

|                             |                    |    |
|-----------------------------|--------------------|----|
| F01_cb1897_c5/f1p0/3283-2F  | RLK-Pelle_LRR-XI-1 | PK |
| F01_cb1962_c0/f6p3/2505-0F  | CMGC_MAPK          | PK |
| F01_cb1962_c1/f4p2/2528-0F  | CMGC_MAPK          | PK |
| F01_cb1962_c1/f4p2/2528-1F  | CMGC_MAPK          | PK |
| F01_cb1962_c2/f1p2/4105-0F  | CMGC_MAPK          | PK |
| F01_cb1962_c2/f1p2/4105-1F  | CMGC_MAPK          | PK |
| F01_cb1962_c4/f1p2/2403-0F  | CMGC_MAPK          | PK |
| F01_cb1962_c5/f1p4/2574-2F  | CMGC_MAPK          | PK |
| F01_cb1962_c7/f1p2/2447-1F  | CMGC_MAPK          | PK |
| F01_cb1962_c8/f26p4/2502-1F | CMGC_MAPK          | PK |
| F01_cb2052_c0/f4p0/4081-0F  | RLK-Pelle_LRR-III  | PK |
| F01_cb2052_c0/f4p0/4081-1F  | RLK-Pelle_LRR-III  | PK |
| F01_cb2052_c1/f2p0/4068-0F  | RLK-Pelle_LRR-III  | PK |
| F01_cb2052_c2/f3p0/4040-1F  | RLK-Pelle_LRR-III  | PK |
| F01_cb2107_c11/f1p0/2039-1F | CAMK_CAMKL-CHK1    | PK |
| F01_cb2107_c13/f1p0/2033-1F | CAMK_CAMKL-CHK1    | PK |
| F01_cb2107_c14/f1p0/2127-0F | CAMK_CAMKL-CHK1    | PK |
| F01_cb2107_c17/f1p0/1838-0F | CAMK_CAMKL-CHK1    | PK |
| F01_cb2107_c2/f1p0/4062-0F  | CAMK_CAMKL-CHK1    | PK |
| F01_cb2107_c2/f1p0/4062-1F  | CAMK_CAMKL-CHK1    | PK |
| F01_cb2107_c3/f1p0/2815-1F  | CAMK_CAMKL-CHK1    | PK |
| F01_cb2107_c4/f1p0/4645-1F  | CAMK_CAMKL-CHK1    | PK |
| F01_cb2107_c6/f1p0/1856-0F  | CAMK_CAMKL-CHK1    | PK |
| F01_cb2107_c7/f1p0/2748-1F  | CAMK_CAMKL-CHK1    | PK |
| F01_cb2107_c7/f1p0/2748-2F  | CAMK_CAMKL-CHK1    | PK |
| F01_cb2107_c8/f1p1/1953-2F  | CAMK_CAMKL-CHK1    | PK |

---

---

|                              |                    |    |
|------------------------------|--------------------|----|
| F01_cb2135_c0/flp0/4045-1F   | RLK-Pelle_Extensin | PK |
| F01_cb2155_c10/flp0/3697-0F  | STE_STE20-Fray     | PK |
| F01_cb2155_c10/flp0/3697-1F  | STE_STE20-Fray     | PK |
| F01_cb2155_c11/flp0/2668-2F  | STE_STE20-Fray     | PK |
| F01_cb2155_c12/flp0/2784-1F  | STE_STE20-Fray     | PK |
| F01_cb2155_c18/flp0/3029-0F  | STE_STE20-Fray     | PK |
| F01_cb2155_c20/flp0/3317-0F  | STE_STE20-Fray     | PK |
| F01_cb2155_c21/flp0/3343-1F  | STE_STE20-Fray     | PK |
| F01_cb2155_c25/f2p1/2883-1F  | STE_STE20-Fray     | PK |
| F01_cb2155_c26/f5p0/2830-2F  | STE_STE20-Fray     | PK |
| F01_cb2155_c3/f7p0/2772-1F   | STE_STE20-Fray     | PK |
| F01_cb2155_c6/f2p0/3314-0F   | STE_STE20-Fray     | PK |
| F01_cb2155_c8/flp0/4028-1F   | STE_STE20-Fray     | PK |
| F01_cb2155_c9/flp0/3407-2F   | STE_STE20-Fray     | PK |
| F01_cb2164_c1/flp0/3263-0F   | STE_STE20-Fray     | PK |
| F01_cb2164_c2/flp0/3126-2F   | STE_STE20-Fray     | PK |
| F01_cb2164_c5/flp0/2608-0F   | STE_STE20-Fray     | PK |
| F01_cb2164_c7/flp0/2957-0F   | STE_STE20-Fray     | PK |
| F01_cb2177_c159/f4p0/3437-1F | RLK-Pelle_LRR-IX   | PK |
| F01_cb2177_c69/flp0/4458-1F  | RLK-Pelle_LRR-IX   | PK |
| F01_cb2177_c72/flp0/4010-1F  | RLK-Pelle_LRR-IX   | PK |
| F01_cb2177_c80/flp0/3411-0F  | RLK-Pelle_LRR-IX   | PK |
| F01_cb2177_c90/flp0/3677-2F  | RLK-Pelle_LRR-IX   | PK |
| F01_cb2177_c91/flp0/3417-2F  | RLK-Pelle_LRR-IX   | PK |
| F01_cb2177_c97/flp0/2557-2F  | RLK-Pelle_LRR-IX   | PK |
| F01_cb2187_c10/flp1/3921-0F  | RLK-Pelle_LRR-XI-1 | PK |

---



---

|                             |                      |    |
|-----------------------------|----------------------|----|
| F01_cb2187_c10/flp1/3921-2F | RLK-Pelle_LRR-XI-1   | PK |
| F01_cb2187_c12/flp0/3730-1F | RLK-Pelle_LRR-XI-1   | PK |
| F01_cb2187_c14/flp0/3388-2F | RLK-Pelle_LRR-XI-1   | PK |
| F01_cb2187_c19/flp0/3843-0F | RLK-Pelle_LRR-XI-1   | PK |
| F01_cb2187_c20/flp2/3187-2F | RLK-Pelle_LRR-XI-1   | PK |
| F01_cb2187_c26/flp2/3431-0F | RLK-Pelle_LRR-XI-1   | PK |
| F01_cb2187_c30/flp0/3087-0F | RLK-Pelle_LRR-XI-1   | PK |
| F01_cb2187_c30/flp0/3087-2F | RLK-Pelle_LRR-XI-1   | PK |
| F01_cb2187_c33/flp0/3495-1F | RLK-Pelle_LRR-XI-1   | PK |
| F01_cb2187_c9/flp0/3345-1F  | RLK-Pelle_LRR-XI-1   | PK |
| F01_cb2195_c19/flp0/1931-0F | RLK-Pelle_DLSV       | PK |
| F01_cb2195_c19/flp0/1931-1F | RLK-Pelle_DLSV       | PK |
| F01_cb2195_c2/f3p0/2787-2F  | RLK-Pelle_DLSV       | PK |
| F01_cb2195_c20/flp0/2740-2F | RLK-Pelle_DLSV       | PK |
| F01_cb2195_c22/flp0/2827-0F | RLK-Pelle_DLSV       | PK |
| F01_cb2195_c23/flp0/3248-1F | RLK-Pelle_DLSV       | PK |
| F01_cb2195_c26/flp0/2900-1F | RLK-Pelle_DLSV       | PK |
| F01_cb2195_c27/flp0/2613-1F | RLK-Pelle_DLSV       | PK |
| F01_cb2195_c3/f3p0/2817-2F  | RLK-Pelle_DLSV       | PK |
| F01_cb2208_c10/flp0/3064-1F | RLK-Pelle_LRR-VIII-1 | PK |
| F01_cb2208_c10/flp0/3064-2F | RLK-Pelle_LRR-VIII-1 | PK |
| F01_cb2208_c13/flp0/3223-0F | RLK-Pelle_LRR-VIII-1 | PK |
| F01_cb2208_c13/flp0/3223-2F | RLK-Pelle_LRR-VIII-1 | PK |
| F01_cb2208_c15/flp0/2981-1F | RLK-Pelle_LRR-VIII-1 | PK |
| F01_cb2208_c15/flp0/2981-2F | RLK-Pelle_LRR-VIII-1 | PK |
| F01_cb2208_c16/flp0/2388-0F | RLK-Pelle_LRR-VIII-1 | PK |

---

---

|                             |                      |    |
|-----------------------------|----------------------|----|
| F01_cb2208_c16/flp0/2388-2F | RLK-Pelle_LRR-VIII-1 | PK |
| F01_cb2208_c18/flp0/3335-2F | RLK-Pelle_LRR-VIII-1 | PK |
| F01_cb2208_c2/f4p0/3275-1F  | RLK-Pelle_LRR-VIII-1 | PK |
| F01_cb2208_c21/flp0/2436-1F | RLK-Pelle_LRR-VIII-1 | PK |
| F01_cb2208_c21/flp0/2436-2F | RLK-Pelle_LRR-VIII-1 | PK |
| F01_cb2208_c22/flp0/2562-0F | RLK-Pelle_LRR-VIII-1 | PK |
| F01_cb2208_c23/flp0/3237-2F | RLK-Pelle_LRR-VIII-1 | PK |
| F01_cb2208_c25/flp0/2989-1F | RLK-Pelle_LRR-VIII-1 | PK |
| F01_cb2208_c27/flp0/2987-1F | RLK-Pelle_LRR-VIII-1 | PK |
| F01_cb2208_c27/flp0/2987-2F | RLK-Pelle_LRR-VIII-1 | PK |
| F01_cb2208_c28/flp1/2703-1F | RLK-Pelle_LRR-VIII-1 | PK |
| F01_cb2208_c30/flp0/3607-0F | RLK-Pelle_LRR-VIII-1 | PK |
| F01_cb2208_c33/flp0/3174-0F | RLK-Pelle_LRR-VIII-1 | PK |
| F01_cb2208_c33/flp0/3174-2F | RLK-Pelle_LRR-VIII-1 | PK |
| F01_cb2208_c34/flp0/3429-0F | RLK-Pelle_LRR-VIII-1 | PK |
| F01_cb2208_c35/flp0/3221-1F | RLK-Pelle_LRR-VIII-1 | PK |
| F01_cb2208_c37/flp0/3146-0F | RLK-Pelle_LRR-VIII-1 | PK |
| F01_cb2208_c38/flp0/2591-0F | RLK-Pelle_LRR-VIII-1 | PK |
| F01_cb2208_c39/flp0/2505-2F | RLK-Pelle_LRR-VIII-1 | PK |
| F01_cb2208_c40/flp0/3281-0F | RLK-Pelle_LRR-VIII-1 | PK |
| F01_cb2208_c42/flp0/2791-0F | RLK-Pelle_LRR-VIII-1 | PK |
| F01_cb2208_c42/flp0/2791-2F | RLK-Pelle_LRR-VIII-1 | PK |
| F01_cb2208_c45/flp0/1853-2F | RLK-Pelle_LRR-VIII-1 | PK |
| F01_cb2208_c46/flp0/1714-0F | RLK-Pelle_LRR-VIII-1 | PK |
| F01_cb2208_c5/f3p0/3196-1F  | RLK-Pelle_LRR-VIII-1 | PK |
| F01_cb2208_c52/flp1/3627-0F | RLK-Pelle_LRR-VIII-1 | PK |

---

---

|                             |                      |    |
|-----------------------------|----------------------|----|
| F01_cb2208_c7/f2p0/2647-1F  | RLK-Pelle_LRR-VIII-1 | PK |
| F01_cb2208_c9/f1p0/3012-1F  | RLK-Pelle_LRR-VIII-1 | PK |
| F01_cb2222_c0/f1p0/4007-1F  | RLK-Pelle_LRR-VI-2   | PK |
| F01_cb2222_c0/f1p0/4007-2F  | RLK-Pelle_LRR-VI-2   | PK |
| F01_cb2222_c1/f1p0/2851-2F  | RLK-Pelle_LRR-VI-2   | PK |
| F01_cb2222_c2/f1p0/2410-2F  | RLK-Pelle_LRR-VI-2   | PK |
| F01_cb2222_c3/f1p0/2396-1F  | RLK-Pelle_LRR-VI-2   | PK |
| F01_cb2242_c1/f4p0/1990-2F  | TKL-PI-5             | PK |
| F01_cb2242_c10/f1p1/2221-1F | TKL-PI-5             | PK |
| F01_cb2242_c12/f1p0/1844-0F | TKL-PI-5             | PK |
| F01_cb2242_c14/f1p0/1775-1F | TKL-PI-5             | PK |
| F01_cb2242_c14/f1p0/1775-2F | TKL-PI-5             | PK |
| F01_cb2242_c3/f2p1/1866-1F  | TKL-PI-5             | PK |
| F01_cb2242_c5/f2p0/2543-0F  | TKL-PI-5             | PK |
| F01_cb2242_c5/f2p0/2543-1F  | TKL-PI-5             | PK |
| F01_cb2242_c7/f1p0/2048-0F  | TKL-PI-5             | PK |
| F01_cb2242_c7/f1p0/2048-2F  | TKL-PI-5             | PK |
| F01_cb2242_c8/f1p0/2306-1F  | TKL-PI-5             | PK |
| F01_cb2242_c8/f1p0/2306-2F  | TKL-PI-5             | PK |
| F01_cb2263_c0/f4p0/2143-2F  | CAMK_CAMKL-LKB       | PK |
| F01_cb2263_c1/f3p1/2288-1F  | CAMK_CAMKL-LKB       | PK |
| F01_cb2263_c11/f1p0/1956-1F | CAMK_CAMKL-LKB       | PK |
| F01_cb2263_c12/f1p0/2668-2F | CAMK_CAMKL-LKB       | PK |
| F01_cb2263_c13/f1p0/3861-1F | CAMK_CAMKL-LKB       | PK |
| F01_cb2263_c13/f1p0/3861-2F | CAMK_CAMKL-LKB       | PK |
| F01_cb2263_c15/f1p0/3195-0F | CAMK_CAMKL-LKB       | PK |

---

---

|                             |                |    |
|-----------------------------|----------------|----|
| F01_cb2263_c18/f1p0/2268-1F | CAMK_CAMKL-LKB | PK |
| F01_cb2263_c19/f1p0/2822-0F | CAMK_CAMKL-LKB | PK |
| F01_cb2263_c2/f3p1/2293-0F  | CAMK_CAMKL-LKB | PK |
| F01_cb2263_c20/f1p0/2614-1F | CAMK_CAMKL-LKB | PK |
| F01_cb2263_c21/f1p0/2103-1F | CAMK_CAMKL-LKB | PK |
| F01_cb2263_c22/f1p0/2315-1F | CAMK_CAMKL-LKB | PK |
| F01_cb2263_c3/f2p0/2490-2F  | CAMK_CAMKL-LKB | PK |
| F01_cb2263_c4/f2p0/2476-1F  | CAMK_CAMKL-LKB | PK |
| F01_cb2263_c4/f2p0/2476-2F  | CAMK_CAMKL-LKB | PK |
| F01_cb2263_c5/f1p0/3994-2F  | CAMK_CAMKL-LKB | PK |
| F01_cb2263_c8/f1p0/2391-1F  | CAMK_CAMKL-LKB | PK |
| F01_cb2263_c8/f1p0/2391-2F  | CAMK_CAMKL-LKB | PK |
| F01_cb2263_c9/f1p0/2491-0F  | CAMK_CAMKL-LKB | PK |
| F01_cb2305_c10/f1p0/2184-0F | NEK            | PK |
| F01_cb2305_c11/f1p0/3032-0F | NEK            | PK |
| F01_cb2305_c11/f1p0/3032-2F | NEK            | PK |
| F01_cb2305_c14/f1p0/2296-1F | NEK            | PK |
| F01_cb2305_c14/f1p0/2296-2F | NEK            | PK |
| F01_cb2305_c15/f1p0/2436-0F | NEK            | PK |
| F01_cb2305_c15/f1p0/2436-2F | NEK            | PK |
| F01_cb2305_c3/f2p0/2548-2F  | NEK            | PK |
| F01_cb2305_c4/f2p0/2538-1F  | NEK            | PK |
| F01_cb2305_c7/f1p0/2918-1F  | NEK            | PK |
| F01_cb2305_c7/f1p0/2918-2F  | NEK            | PK |
| F01_cb2305_c8/f1p0/2515-2F  | NEK            | PK |
| F01_cb2305_c9/f1p0/3279-0F  | NEK            | PK |

---

---

|                              |                    |    |
|------------------------------|--------------------|----|
| F01_cb2333_c0/f1p0/3971-1R   | RLK-Pelle_DLSV     | PK |
| F01_cb2333_c0/f1p0/3971-2R   | RLK-Pelle_CR4L     | PK |
| F01_cb2338_c0/f1p0/3970-1F   | PEK_GCN2           | PK |
| F01_cb2338_c0/f1p0/3970-2F   | PEK_GCN2           | PK |
| F01_cb2338_c1/f1p0/4453-1F   | PEK_GCN2           | PK |
| F01_cb2389_c10/f1p0/3549-0F  | NEK                | PK |
| F01_cb2389_c15/f1p0/2930-2F  | NEK                | PK |
| F01_cb2389_c4/f1p0/3334-0F   | NEK                | PK |
| F01_cb2389_c4/f1p0/3334-2F   | NEK                | PK |
| F01_cb2389_c5/f1p0/3424-1F   | NEK                | PK |
| F01_cb2389_c5/f1p0/3424-2F   | NEK                | PK |
| F01_cb2389_c8/f1p0/3551-2F   | NEK                | PK |
| F01_cb2389_c9/f1p0/3504-2F   | NEK                | PK |
| F01_cb2405_c0/f1p0/3942-2F   | TKL-PI-6           | PK |
| F01_cb2405_c1/f1p0/3572-0F   | TKL-PI-6           | PK |
| F01_cb2405_c1/f1p0/3572-2F   | TKL-PI-6           | PK |
| F01_cb2405_c2/f1p0/2041-0F   | TKL-PI-6           | PK |
| F01_cb2448_c1/f2p0/3376-2F   | RLK-Pelle_LRR-XI-1 | PK |
| F01_cb2448_c14/f6p0/3347-1F  | RLK-Pelle_LRR-XI-1 | PK |
| F01_cb2448_c2/f1p0/3926-0F   | RLK-Pelle_LRR-XI-1 | PK |
| F01_cb2448_c2/f1p0/3926-1F   | RLK-Pelle_LRR-XI-1 | PK |
| F01_cb2448_c3/f1p0/3231-2F   | RLK-Pelle_LRR-XI-1 | PK |
| F01_cb2448_c4/f1p0/3324-1F   | RLK-Pelle_LRR-XI-1 | PK |
| F01_cb2448_c4/f1p0/3324-2F   | RLK-Pelle_LRR-XI-1 | PK |
| F01_cb2448_c6/f1p0/3197-0F   | RLK-Pelle_LRR-XI-1 | PK |
| F01_cb2482_c30/f13p1/3051-1F | PEK_GCN2           | PK |

---

---

|                              |                     |    |
|------------------------------|---------------------|----|
| F01_cb2482_c31/flp1/2865-1F  | PEK_GCN2            | PK |
| F01_cb2482_c45/flp0/3357-2F  | PEK_GCN2            | PK |
| F01_cb2482_c57/fl3p2/3062-1F | PEK_GCN2            | PK |
| F01_cb2482_c6/f2p1/3099-2F   | PEK_GCN2            | PK |
| F01_cb2501_c10/flp0/2573-0F  | STE_STE20-Fray      | PK |
| F01_cb2501_c11/flp0/2612-1F  | STE_STE20-Fray      | PK |
| F01_cb2501_c13/flp0/2572-2F  | STE_STE20-Fray      | PK |
| F01_cb2501_c14/flp1/2816-2F  | STE_STE20-Fray      | PK |
| F01_cb2501_c17/flp0/3044-0F  | STE_STE20-Fray      | PK |
| F01_cb2501_c20/flp0/3134-1F  | STE_STE20-Fray      | PK |
| F01_cb2501_c21/flp0/3101-0F  | STE_STE20-Fray      | PK |
| F01_cb2501_c23/flp0/3165-2F  | STE_STE20-Fray      | PK |
| F01_cb2501_c24/flp0/2915-0F  | STE_STE20-Fray      | PK |
| F01_cb2501_c31/flp0/1967-1F  | STE_STE20-Fray      | PK |
| F01_cb2501_c4/f4p0/2994-1F   | STE_STE20-Fray      | PK |
| F01_cb2501_c6/f2p0/2804-0F   | STE_STE20-Fray      | PK |
| F01_cb2501_c6/f2p0/2804-2F   | STE_STE20-Fray      | PK |
| F01_cb2501_c7/f2p0/2631-2F   | STE_STE20-Fray      | PK |
| F01_cb2501_c8/flp0/3903-1F   | STE_STE20-Fray      | PK |
| F01_cb2501_c8/flp0/3903-2F   | STE_STE20-Fray      | PK |
| F01_cb2501_c9/flp0/2890-1F   | STE_STE20-Fray      | PK |
| F01_cb2516_c5/flp0/3824-2F   | RLK-Pelle_LRR-XIIIb | PK |
| F01_cb2517_c1/f3p0/2265-1F   | TKL-PI-4            | PK |
| F01_cb2517_c11/flp0/2274-0F  | TKL-PI-4            | PK |
| F01_cb2517_c12/flp0/2406-0F  | TKL-PI-4            | PK |
| F01_cb2517_c3/f2p0/3772-0F   | TKL-PI-4            | PK |

---

---

|                             |                       |    |
|-----------------------------|-----------------------|----|
| F01_cb2517_c3/f2p0/3772-2F  | TKL-PI-4              | PK |
| F01_cb2517_c5/f1p0/2210-0F  | TKL-PI-4              | PK |
| F01_cb2517_c7/f1p0/2289-2F  | TKL-PI-4              | PK |
| F01_cb2517_c8/f1p0/3354-0F  | TKL-PI-4              | PK |
| F01_cb2519_c1/f1p0/3804-1F  | RLK-Pelle_LRR-Xb-1    | PK |
| F01_cb2520_c0/f1p0/3145-2F  | RLK-Pelle_LRR-VI-1    | PK |
| F01_cb2520_c14/f1p1/2870-2F | RLK-Pelle_LRR-VI-1    | PK |
| F01_cb2520_c17/f1p0/3137-2F | RLK-Pelle_LRR-VI-1    | PK |
| F01_cb2520_c20/f1p1/2903-0F | RLK-Pelle_LRR-VI-1    | PK |
| F01_cb2520_c3/f2p0/2952-0F  | RLK-Pelle_LRR-VI-1    | PK |
| F01_cb2520_c4/f2p0/3911-1F  | RLK-Pelle_LRR-VI-1    | PK |
| F01_cb2520_c5/f1p0/3341-0F  | RLK-Pelle_LRR-VI-1    | PK |
| F01_cb2520_c6/f1p0/4295-0F  | RLK-Pelle_LRR-VI-1    | PK |
| F01_cb2520_c7/f1p1/3561-0F  | RLK-Pelle_LRR-VI-1    | PK |
| F01_cb2532_c14/f1p0/2373-0F | RLK-Pelle_CrRLK1L-1   | PK |
| F01_cb2532_c18/f3p3/3329-0F | RLK-Pelle_CrRLK1L-1   | PK |
| F01_cb2532_c2/f3p3/3381-0F  | RLK-Pelle_CrRLK1L-1   | PK |
| F01_cb2532_c5/f1p3/3858-0F  | RLK-Pelle_CrRLK1L-1   | PK |
| F01_cb2579_c0/f2p0/1501-0F  | RLK-Pelle_RLCK-VIIa-2 | PK |
| F01_cb2579_c0/f2p0/1501-2F  | RLK-Pelle_RLCK-VIIa-2 | PK |
| F01_cb2579_c2/f1p0/5000-0F  | RLK-Pelle_RLCK-VIIa-2 | PK |
| F01_cb2579_c2/f1p0/5000-1F  | RLK-Pelle_RLCK-VIIa-2 | PK |
| F01_cb2579_c3/f1p0/3543-1F  | RLK-Pelle_RLCK-VIIa-2 | PK |
| F01_cb2579_c4/f1p0/1818-1F  | RLK-Pelle_RLCK-VIIa-2 | PK |
| F01_cb2579_c4/f1p0/1818-2F  | RLK-Pelle_RLCK-VIIa-2 | PK |
| F01_cb2579_c5/f1p0/1601-1F  | RLK-Pelle_RLCK-VIIa-2 | PK |

---

---

|                             |                    |    |
|-----------------------------|--------------------|----|
| F01_cb2583_c0/flp2/3852-0F  | CMGC_GSKL          | PK |
| F01_cb2610_c16/f3p0/3772-1F | RLK-Pelle_LRR-XI-1 | PK |
| F01_cb2610_c8/flp0/4067-0F  | RLK-Pelle_LRR-XI-1 | PK |
| F01_cb2643_c10/flp0/2833-2F | RLK-Pelle_LRR-I-1  | PK |
| F01_cb2643_c11/flp1/3425-1F | RLK-Pelle_LRR-I-1  | PK |
| F01_cb2643_c11/flp1/3425-2F | RLK-Pelle_LRR-I-1  | PK |
| F01_cb2643_c12/flp0/2916-0F | RLK-Pelle_LRR-I-1  | PK |
| F01_cb2643_c13/flp0/3261-1F | RLK-Pelle_LRR-I-1  | PK |
| F01_cb2643_c20/flp0/3313-2F | RLK-Pelle_LRR-I-1  | PK |
| F01_cb2643_c4/f2p0/3433-1F  | RLK-Pelle_LRR-I-1  | PK |
| F01_cb2643_c6/flp0/3857-2F  | RLK-Pelle_LRR-I-1  | PK |
| F01_cb2643_c9/flp0/3249-1F  | RLK-Pelle_LRR-I-1  | PK |
| F01_cb2655_c0/flp0/3850-1F  | RLK-Pelle_LRR-Xb-1 | PK |
| F01_cb2655_c1/flp0/4332-2F  | RLK-Pelle_LRR-Xb-1 | PK |
| F01_cb2655_c2/flp0/3073-2F  | RLK-Pelle_LRR-Xb-1 | PK |
| F01_cb2663_c0/f7p0/3459-2F  | RLK-Pelle_RLCK-IXb | PK |
| F01_cb2663_c1/f3p0/3484-0F  | RLK-Pelle_RLCK-IXb | PK |
| F01_cb2663_c1/f3p0/3484-1F  | RLK-Pelle_RLCK-IXb | PK |
| F01_cb2663_c10/flp0/2836-0F | RLK-Pelle_RLCK-IXb | PK |
| F01_cb2663_c4/flp0/3376-1F  | RLK-Pelle_RLCK-IXb | PK |
| F01_cb2663_c5/flp0/3025-0F  | RLK-Pelle_RLCK-IXb | PK |
| F01_cb2663_c6/flp0/3293-1F  | RLK-Pelle_RLCK-IXb | PK |
| F01_cb2663_c7/flp0/3242-1F  | RLK-Pelle_RLCK-IXb | PK |
| F01_cb2688_c0/flp0/3748-2F  | CMGC_DYRK-PRP4     | PK |
| F01_cb2688_c1/flp0/2450-2F  | CMGC_DYRK-PRP4     | PK |
| F01_cb2688_c2/flp0/3661-0F  | CMGC_DYRK-PRP4     | PK |

---



---

|                             |                    |    |
|-----------------------------|--------------------|----|
| F01_cb2735_c14/flp3/3537-0F | RLK-Pelle_LRR-XI-1 | PK |
| F01_cb2735_c15/flp0/2847-2F | RLK-Pelle_LRR-XI-1 | PK |
| F01_cb2735_c7/flp3/3636-2F  | RLK-Pelle_LRR-XI-1 | PK |
| F01_cb2735_c8/flp3/4461-1F  | RLK-Pelle_LRR-XI-1 | PK |
| F01_cb2770_c12/flp1/3809-0F | RLK-Pelle_SD-2b    | PK |
| F01_cb2770_c12/flp1/3809-1F | RLK-Pelle_DLSV     | PK |
| F01_cb2770_c12/flp1/3809-2F | RLK-Pelle_DLSV     | PK |
| F01_cb2770_c13/flp1/2635-1F | RLK-Pelle_LRR-III  | PK |
| F01_cb2770_c13/flp1/2635-2F | RLK-Pelle_DLSV     | PK |
| F01_cb2770_c14/flp1/3101-1F | RLK-Pelle_DLSV     | PK |
| F01_cb2770_c15/flp1/3337-0F | RLK-Pelle_DLSV     | PK |
| F01_cb2770_c15/flp1/3337-1F | RLK-Pelle_DLSV     | PK |
| F01_cb2770_c15/flp1/3337-2F | RLK-Pelle_DLSV     | PK |
| F01_cb2770_c16/flp0/3092-1F | RLK-Pelle_DLSV     | PK |
| F01_cb2770_c17/flp0/3038-1F | RLK-Pelle_DLSV     | PK |
| F01_cb2770_c17/flp0/3038-2F | RLK-Pelle_DLSV     | PK |
| F01_cb2770_c19/flp0/3145-1F | RLK-Pelle_DLSV     | PK |
| F01_cb2770_c19/flp0/3145-2F | RLK-Pelle_DLSV     | PK |
| F01_cb2770_c2/f3p0/2565-1F  | RLK-Pelle_DLSV     | PK |
| F01_cb2770_c21/flp0/3235-1F | RLK-Pelle_DLSV     | PK |
| F01_cb2770_c22/flp0/3195-1F | RLK-Pelle_DLSV     | PK |
| F01_cb2770_c22/flp0/3195-2F | RLK-Pelle_CR4L     | PK |
| F01_cb2770_c24/flp1/2794-1F | RLK-Pelle_DLSV     | PK |
| F01_cb2770_c24/flp1/2794-2F | RLK-Pelle_DLSV     | PK |
| F01_cb2770_c26/flp0/4911-0F | RLK-Pelle_DLSV     | PK |
| F01_cb2770_c27/flp1/2537-1F | RLK-Pelle_DLSV     | PK |

---

---

|                             |                |    |
|-----------------------------|----------------|----|
| F01_cb2770_c28/flp0/3699-0F | RLK-Pelle_DLSV | PK |
| F01_cb2770_c28/flp0/3699-1F | RLK-Pelle_DLSV | PK |
| F01_cb2770_c28/flp0/3699-2F | RLK-Pelle_DLSV | PK |
| F01_cb2770_c29/flp0/2418-0F | RLK-Pelle_DLSV | PK |
| F01_cb2770_c29/flp0/2418-2F | RLK-Pelle_DLSV | PK |
| F01_cb2770_c30/flp2/2621-0F | RLK-Pelle_DLSV | PK |
| F01_cb2770_c32/flp1/2588-0F | RLK-Pelle_DLSV | PK |
| F01_cb2770_c35/flp0/2093-1F | RLK-Pelle_DLSV | PK |
| F01_cb2770_c35/flp0/2093-2F | RLK-Pelle_DLSV | PK |
| F01_cb2770_c36/flp0/3443-1F | RLK-Pelle_DLSV | PK |
| F01_cb2770_c36/flp0/3443-2F | RLK-Pelle_DLSV | PK |
| F01_cb2770_c37/flp0/2426-1F | RLK-Pelle_DLSV | PK |
| F01_cb2770_c38/flp0/3465-0F | RLK-Pelle_DLSV | PK |
| F01_cb2770_c38/flp0/3465-1F | RLK-Pelle_DLSV | PK |
| F01_cb2770_c38/flp0/3465-2F | RLK-Pelle_DLSV | PK |
| F01_cb2770_c39/flp0/2594-2F | RLK-Pelle_DLSV | PK |
| F01_cb2770_c41/flp1/2574-2F | RLK-Pelle_DLSV | PK |
| F01_cb2770_c42/flp1/2535-2F | RLK-Pelle_DLSV | PK |
| F01_cb2770_c43/flp1/2757-1F | RLK-Pelle_DLSV | PK |
| F01_cb2770_c44/flp0/3320-0F | RLK-Pelle_DLSV | PK |
| F01_cb2770_c45/flp1/2767-2F | RLK-Pelle_DLSV | PK |
| F01_cb2770_c46/flp1/3457-1F | RLK-Pelle_DLSV | PK |
| F01_cb2770_c46/flp1/3457-2F | RLK-Pelle_DLSV | PK |
| F01_cb2770_c47/flp0/3578-1F | RLK-Pelle_DLSV | PK |
| F01_cb2770_c48/f2p1/2540-0F | RLK-Pelle_DLSV | PK |
| F01_cb2770_c48/f2p1/2540-1F | RLK-Pelle_DLSV | PK |

---

---

|                             |                     |    |
|-----------------------------|---------------------|----|
| F01_cb2770_c48/f2p1/2540-2F | RLK-Pelle_DLSV      | PK |
| F01_cb2770_c49/f1p0/2592-1F | RLK-Pelle_DLSV      | PK |
| F01_cb2770_c50/f1p0/2615-1F | RLK-Pelle_DLSV      | PK |
| F01_cb2770_c52/f1p0/2648-2F | RLK-Pelle_DLSV      | PK |
| F01_cb2770_c55/f1p0/2896-1F | RLK-Pelle_DLSV      | PK |
| F01_cb2770_c57/f1p1/3444-1F | RLK-Pelle_DLSV      | PK |
| F01_cb2770_c57/f1p1/3444-2F | RLK-Pelle_DLSV      | PK |
| F01_cb2770_c58/f1p0/3220-0F | RLK-Pelle_DLSV      | PK |
| F01_cb2770_c59/f1p0/2758-2F | RLK-Pelle_DLSV      | PK |
| F01_cb2770_c68/f1p0/2804-2F | RLK-Pelle_DLSV      | PK |
| F01_cb2770_c73/f1p0/3196-0F | RLK-Pelle_DLSV      | PK |
| F01_cb2770_c73/f1p0/3196-2F | RLK-Pelle_DLSV      | PK |
| F01_cb2770_c75/f1p0/2342-1F | RLK-Pelle_DLSV      | PK |
| F01_cb2770_c78/f1p0/1820-0F | RLK-Pelle_DLSV      | PK |
| F01_cb2802_c11/f1p0/2727-1F | CMGC_CDK-CDK8       | PK |
| F01_cb2802_c14/f1p0/2534-1F | CMGC_CDK-CDK8       | PK |
| F01_cb2802_c17/f5p0/2060-1F | CMGC_CDK-CDK8       | PK |
| F01_cb2802_c3/f2p0/1941-2F  | CMGC_CDK-CDK8       | PK |
| F01_cb2802_c4/f1p0/3732-2F  | CMGC_CDK-CDK8       | PK |
| F01_cb2802_c6/f1p0/1916-1F  | CMGC_CDK-CDK8       | PK |
| F01_cb2802_c7/f1p0/1966-1F  | CMGC_CDK-CDK8       | PK |
| F01_cb2810_c1/f1p0/3610-1F  | RLK-Pelle_LRR-XII-1 | PK |
| F01_cb2810_c2/f1p0/3579-1F  | RLK-Pelle_LRR-XII-1 | PK |
| F01_cb2810_c4/f1p0/3486-0F  | RLK-Pelle_LRR-XII-1 | PK |
| F01_cb2821_c0/f1p0/3647-1F  | CMGC_CLK            | PK |
| F01_cb2821_c1/f1p0/2302-1F  | CMGC_CLK            | PK |

---

---

|                             |                     |    |
|-----------------------------|---------------------|----|
| F01_cb2821_c2/flp0/2624-1F  | CMGC_CLK            | PK |
| F01_cb2821_c3/flp0/1030-0F  | CMGC_CLK            | PK |
| F01_cb2821_c3/flp0/1030-2F  | CMGC_CLK            | PK |
| F01_cb2823_c1/flp0/3417-1R  | RLK-Pelle_LRR-XI-1  | PK |
| F01_cb2840_c0/flp0/3793-1F  | RLK-Pelle_LRR-XII-1 | PK |
| F01_cb2840_c2/flp0/1528-1F  | RLK-Pelle_LRR-XII-1 | PK |
| F01_cb2840_c2/flp0/1528-2F  | RLK-Pelle_LRR-XII-1 | PK |
| F01_cb2849_c10/flp0/3378-1F | RLK-Pelle_LysM      | PK |
| F01_cb2849_c11/flp0/2657-1F | RLK-Pelle_LysM      | PK |
| F01_cb2849_c13/flp0/2942-2F | RLK-Pelle_LysM      | PK |
| F01_cb2849_c16/f3p0/2734-0F | RLK-Pelle_LysM      | PK |
| F01_cb2849_c2/flp0/3791-0F  | RLK-Pelle_LysM      | PK |
| F01_cb2849_c2/flp0/3791-1F  | RLK-Pelle_LysM      | PK |
| F01_cb2849_c2/flp0/3791-2F  | RLK-Pelle_LysM      | PK |
| F01_cb2854_c10/flp0/3788-1F | RLK-Pelle_LRR-XI-1  | PK |
| F01_cb2854_c11/flp0/3334-0F | RLK-Pelle_LRR-XI-1  | PK |
| F01_cb2854_c12/flp0/3908-0F | RLK-Pelle_LRR-XI-1  | PK |
| F01_cb2854_c14/flp0/3567-1F | RLK-Pelle_LRR-XI-1  | PK |
| F01_cb2854_c15/flp0/3776-2F | RLK-Pelle_LRR-XI-1  | PK |
| F01_cb2854_c5/f2p0/3548-1F  | RLK-Pelle_LRR-XI-1  | PK |
| F01_cb2900_c2/flp0/3756-0F  | SCY1_SCYL2          | PK |
| F01_cb2900_c3/flp0/3545-1F  | SCY1_SCYL2          | PK |
| F01_cb2900_c5/flp0/2187-2F  | SCY1_SCYL2          | PK |
| F01_cb2938_c0/f2p0/3750-1F  | RLK-Pelle_LRR-XI-1  | PK |
| F01_cb2938_c1/flp0/3758-2F  | RLK-Pelle_LRR-XI-1  | PK |
| F01_cb2965_c0/flp0/3440-0F  | RLK-Pelle_LRR-XII-1 | PK |

---

---

|                             |                     |    |
|-----------------------------|---------------------|----|
| F01_cb2965_c1/f1p0/3306-1F  | RLK-Pelle_LRR-XII-1 | PK |
| F01_cb2965_c1/f1p0/3306-2F  | RLK-Pelle_LRR-XII-1 | PK |
| F01_cb2965_c3/f1p0/3423-1F  | RLK-Pelle_LRR-XII-1 | PK |
| F01_cb2965_c4/f1p0/3375-1F  | RLK-Pelle_LRR-XII-1 | PK |
| F01_cb3115_c0/f1p0/3717-0F  | RLK-Pelle_LRR-XI-1  | PK |
| F01_cb3115_c0/f1p0/3717-2F  | RLK-Pelle_LRR-XI-1  | PK |
| F01_cb3115_c1/f1p0/3824-0F  | RLK-Pelle_LRR-XI-1  | PK |
| F01_cb3115_c1/f1p0/3824-1F  | RLK-Pelle_LRR-XI-1  | PK |
| F01_cb3115_c3/f1p0/3418-0F  | RLK-Pelle_LRR-XI-1  | PK |
| F01_cb3115_c5/f1p0/3669-0F  | RLK-Pelle_LRR-XI-1  | PK |
| F01_cb3130_c0/f2p0/2363-0F  | RLK-Pelle_LRR-II    | PK |
| F01_cb3130_c1/f1p0/3713-2F  | RLK-Pelle_LRR-II    | PK |
| F01_cb3130_c2/f1p0/2365-0F  | RLK-Pelle_LRR-II    | PK |
| F01_cb3130_c4/f1p0/2408-1F  | RLK-Pelle_LRR-II    | PK |
| F01_cb3130_c5/f1p0/2742-0F  | RLK-Pelle_LRR-II    | PK |
| F01_cb3130_c7/f1p0/2534-2F  | RLK-Pelle_LRR-II    | PK |
| F01_cb3134_c0/f3p0/3714-1F  | RLK-Pelle_LRR-Xb-1  | PK |
| F01_cb3134_c1/f1p0/3871-2F  | RLK-Pelle_LRR-Xb-1  | PK |
| F01_cb3134_c3/f1p0/5077-0F  | RLK-Pelle_LRR-Xb-1  | PK |
| F01_cb3170_c0/f2p1/2670-0F  | TKL-PI-4            | PK |
| F01_cb3170_c3/f1p1/2075-1F  | TKL-PI-4            | PK |
| F01_cb3170_c4/f1p1/2150-2F  | TKL-PI-4            | PK |
| F01_cb3170_c5/f1p2/2463-0F  | TKL-PI-4            | PK |
| F01_cb3170_c6/f1p0/2104-0F  | TKL-PI-4            | PK |
| F01_cb3183_c13/f1p3/2674-2F | RLK-Pelle_CrRLK1L-1 | PK |
| F01_cb3183_c3/f2p4/3655-2F  | RLK-Pelle_CrRLK1L-1 | PK |

---

---

|                             |                     |    |
|-----------------------------|---------------------|----|
| F01_cb3183_c6/f2p4/3666-1F  | RLK-Pelle_CrRLK1L-1 | PK |
| F01_cb3183_c8/f1p3/3030-0F  | RLK-Pelle_CrRLK1L-1 | PK |
| F01_cb3230_c1/f1p0/3098-0F  | RLK-Pelle_RLCK-IXb  | PK |
| F01_cb3263_c1/f1p0/3442-1F  | RLK-Pelle_LRR-XII-1 | PK |
| F01_cb3263_c10/f1p0/1731-1F | RLK-Pelle_LRR-XII-1 | PK |
| F01_cb3263_c3/f1p0/3378-0F  | RLK-Pelle_LRR-XII-1 | PK |
| F01_cb3263_c5/f1p0/3305-2F  | RLK-Pelle_LRR-XII-1 | PK |
| F01_cb3309_c10/f1p1/3166-1F | CMGC_CLK            | PK |
| F01_cb3309_c11/f1p0/1951-1F | CMGC_CLK            | PK |
| F01_cb3309_c11/f1p0/1951-2F | CMGC_CLK            | PK |
| F01_cb3309_c13/f1p0/2443-2F | CMGC_CLK            | PK |
| F01_cb3309_c14/f1p0/2567-2F | CMGC_CLK            | PK |
| F01_cb3309_c15/f1p0/1803-0F | CMGC_CLK            | PK |
| F01_cb3309_c16/f1p0/1711-0F | CMGC_CLK            | PK |
| F01_cb3309_c2/f2p0/2095-1F  | CMGC_CLK            | PK |
| F01_cb3309_c3/f2p0/1731-0F  | CMGC_CLK            | PK |
| F01_cb3309_c3/f2p0/1731-1F  | CMGC_CLK            | PK |
| F01_cb3309_c4/f1p1/3664-2F  | CMGC_CLK            | PK |
| F01_cb3309_c5/f1p0/3239-2F  | CMGC_CLK            | PK |
| F01_cb3309_c6/f1p0/2086-2F  | CMGC_CLK            | PK |
| F01_cb3309_c7/f1p0/1997-0F  | CMGC_CLK            | PK |
| F01_cb3309_c8/f1p0/1954-1F  | CMGC_CLK            | PK |
| F01_cb3309_c9/f1p0/2090-1F  | CMGC_CLK            | PK |
| F01_cb3326_c2/f1p0/4564-0F  | RLK-Pelle_LRR-Xb-2  | PK |
| F01_cb3326_c4/f1p0/3861-1F  | RLK-Pelle_LRR-Xb-2  | PK |
| F01_cb3326_c6/f1p0/3863-1F  | RLK-Pelle_LRR-Xb-2  | PK |

---

---

|                            |                        |    |
|----------------------------|------------------------|----|
| F01_cb3337_c0/f2p0/2594-0F | RLK-Pelle_WAK_LRK10L-1 | PK |
| F01_cb3337_c1/f2p0/2494-2F | RLK-Pelle_WAK_LRK10L-1 | PK |
| F01_cb3337_c2/f1p0/3655-1F | RLK-Pelle_WAK_LRK10L-1 | PK |
| F01_cb3337_c3/f1p0/3629-0F | RLK-Pelle_WAK_LRK10L-1 | PK |
| F01_cb3337_c6/f1p0/2762-0F | RLK-Pelle_WAK_LRK10L-1 | PK |
| F01_cb3371_c0/f5p1/2506-2F | CAMK_CDPK              | PK |
| F01_cb3371_c1/f2p1/2479-0F | CAMK_CDPK              | PK |
| F01_cb3371_c1/f2p1/2479-1F | CAMK_CDPK              | PK |
| F01_cb3371_c1/f2p1/2479-2F | CAMK_CDPK              | PK |
| F01_cb3371_c3/f2p1/2565-2F | CAMK_CDPK              | PK |
| F01_cb3371_c4/f1p0/3647-0F | CAMK_CDPK              | PK |
| F01_cb3371_c4/f1p0/3647-2F | CAMK_CDPK              | PK |
| F01_cb3371_c5/f1p0/2283-1F | CAMK_CDPK              | PK |
| F01_cb3371_c9/f1p0/2372-0F | CAMK_CDPK              | PK |
| F01_cb3372_c1/f1p0/3385-0F | RLK-Pelle_LRR-XI-1     | PK |
| F01_cb33_c0/f5p0/1993-2F   | CMGC_GSK               | PK |
| F01_cb33_c1/f2p0/2095-1F   | CMGC_GSK               | PK |
| F01_cb33_c2/f3p1/1966-2F   | CMGC_GSK               | PK |
| F01_cb33_c5/f1p1/2191-0F   | CMGC_GSK               | PK |
| F01_cb33_c5/f1p1/2191-2F   | CMGC_GSK               | PK |
| F01_cb33_c7/f1p0/1963-2F   | CMGC_GSK               | PK |
| F01_cb33_c8/f1p0/1900-0F   | CMGC_GSK               | PK |
| F01_cb3435_c0/f3p0/3501-0F | RLK-Pelle_LRR-IX       | PK |
| F01_cb3435_c0/f3p0/3501-2F | RLK-Pelle_LRR-IX       | PK |
| F01_cb3435_c1/f1p0/3625-2F | RLK-Pelle_LRR-IX       | PK |
| F01_cb3435_c4/f1p0/3640-1F | RLK-Pelle_LRR-IX       | PK |

---

---

|                             |                       |    |
|-----------------------------|-----------------------|----|
| F01_cb3435_c6/flp1/3576-0F  | RLK-Pelle_LRR-IX      | PK |
| F01_cb3439_c0/flp0/3625-1F  | RLK-Pelle_LRR-XII-1   | PK |
| F01_cb3439_c0/flp0/3625-2F  | RLK-Pelle_LRR-XII-1   | PK |
| F01_cb3439_c1/flp0/4663-1F  | RLK-Pelle_LRR-XII-1   | PK |
| F01_cb3439_c2/flp0/3280-0F  | RLK-Pelle_LRR-XII-1   | PK |
| F01_cb3439_c2/flp0/3280-1F  | RLK-Pelle_LRR-XII-1   | PK |
| F01_cb3439_c3/flp0/2926-0F  | RLK-Pelle_LRR-XII-1   | PK |
| F01_cb3439_c3/flp0/2926-1F  | RLK-Pelle_LRR-XII-1   | PK |
| F01_cb3439_c5/flp0/2543-2F  | RLK-Pelle_LRR-XII-1   | PK |
| F01_cb3470_c1/flp0/3617-1F  | RLK-Pelle_LRR-XIV     | PK |
| F01_cb3470_c2/flp0/2829-1F  | RLK-Pelle_LRR-XIV     | PK |
| F01_cb3470_c3/flp0/3191-0F  | RLK-Pelle_LRR-XIV     | PK |
| F01_cb3470_c5/flp0/3472-0F  | RLK-Pelle_LRR-XIV     | PK |
| F01_cb3470_c6/flp0/3057-1F  | RLK-Pelle_LRR-XIV     | PK |
| F01_cb3470_c7/flp0/2987-0F  | RLK-Pelle_LRR-XIV     | PK |
| F01_cb3474_c0/flp0/3617-2F  | RLK-Pelle_RLCK-VIIa-1 | PK |
| F01_cb3474_c1/flp0/3693-1F  | RLK-Pelle_RLCK-VIIa-1 | PK |
| F01_cb3474_c1/flp0/3693-2F  | RLK-Pelle_RLCK-VIIa-1 | PK |
| F01_cb3527_c1/flp0/3601-1F  | RLK-Pelle_LRK10L-2    | PK |
| F01_cb3527_c10/flp1/3423-0F | RLK-Pelle_LRK10L-2    | PK |
| F01_cb3527_c12/flp1/2296-2F | RLK-Pelle_LRK10L-2    | PK |
| F01_cb3527_c14/flp1/2566-1F | RLK-Pelle_LRK10L-2    | PK |
| F01_cb3527_c15/flp1/1912-1F | RLK-Pelle_LRK10L-2    | PK |
| F01_cb3527_c16/flp1/2234-2F | RLK-Pelle_LRK10L-2    | PK |
| F01_cb3527_c19/flp0/2224-0F | RLK-Pelle_LRK10L-2    | PK |
| F01_cb3527_c19/flp0/2224-1F | RLK-Pelle_LRK10L-2    | PK |

---



---

|                             |                    |    |
|-----------------------------|--------------------|----|
| F01_cb3527_c21/flp1/2165-0F | RLK-Pelle_LRK10L-2 | PK |
| F01_cb3527_c22/flp0/1864-2F | RLK-Pelle_LRK10L-2 | PK |
| F01_cb3527_c5/flp1/2206-1F  | RLK-Pelle_LRK10L-2 | PK |
| F01_cb3527_c7/flp0/2341-0F  | RLK-Pelle_LRK10L-2 | PK |
| F01_cb3531_c12/flp0/2627-2F | RLK-Pelle_LRR-VI-2 | PK |
| F01_cb3531_c14/flp0/2881-1F | RLK-Pelle_LRR-VI-2 | PK |
| F01_cb3531_c15/flp0/2480-2F | RLK-Pelle_LRR-VI-2 | PK |
| F01_cb3531_c17/flp0/2938-1F | RLK-Pelle_LRR-VI-2 | PK |
| F01_cb3531_c17/flp0/2938-2F | RLK-Pelle_LRR-VI-2 | PK |
| F01_cb3531_c18/flp0/2707-0F | RLK-Pelle_LRR-VI-2 | PK |
| F01_cb3531_c20/flp0/2825-1F | RLK-Pelle_LRR-VI-2 | PK |
| F01_cb3531_c22/flp0/2608-0F | RLK-Pelle_LRR-VI-2 | PK |
| F01_cb3531_c24/f9p1/3281-2F | RLK-Pelle_LRR-VI-2 | PK |
| F01_cb3531_c4/f2p1/3294-0F  | RLK-Pelle_LRR-VI-2 | PK |
| F01_cb3531_c4/f2p1/3294-2F  | RLK-Pelle_LRR-VI-2 | PK |
| F01_cb3555_c0/f2p0/5456-0F  | TKL-PI-1           | PK |
| F01_cb3555_c6/flp0/5501-2F  | TKL-PI-1           | PK |
| F01_cb3555_c7/flp0/5403-1F  | TKL-PI-1           | PK |
| F01_cb3562_c15/flp1/2983-1F | RLK-Pelle_RLCK-VI  | PK |
| F01_cb3562_c19/flp0/3192-0F | RLK-Pelle_RLCK-VI  | PK |
| F01_cb3562_c19/flp0/3192-1F | RLK-Pelle_RLCK-VI  | PK |
| F01_cb3562_c22/flp0/2867-0F | RLK-Pelle_RLCK-VI  | PK |
| F01_cb3562_c25/flp0/3146-2F | RLK-Pelle_RLCK-VI  | PK |
| F01_cb3562_c27/flp0/3043-1F | RLK-Pelle_RLCK-VI  | PK |
| F01_cb3562_c28/flp0/2970-0F | RLK-Pelle_RLCK-VI  | PK |
| F01_cb3562_c29/f2p0/2954-2F | RLK-Pelle_RLCK-VI  | PK |

---

---

|                             |                     |    |
|-----------------------------|---------------------|----|
| F01_cb3562_c30/f1p0/2949-0F | RLK-Pelle_RLCK-VI   | PK |
| F01_cb3562_c6/f1p2/3245-2F  | RLK-Pelle_RLCK-VI   | PK |
| F01_cb3593_c0/f3p0/2940-1F  | RLK-Pelle_RKF3      | PK |
| F01_cb3593_c0/f3p0/2940-2F  | RLK-Pelle_RKF3      | PK |
| F01_cb3593_c1/f1p0/3600-1F  | RLK-Pelle_RKF3      | PK |
| F01_cb3593_c2/f1p0/2887-1F  | RLK-Pelle_RKF3      | PK |
| F01_cb3593_c3/f1p0/2862-0F  | RLK-Pelle_RKF3      | PK |
| F01_cb3593_c3/f1p0/2862-1F  | RLK-Pelle_RKF3      | PK |
| F01_cb3593_c5/f1p0/2399-2F  | RLK-Pelle_RKF3      | PK |
| F01_cb3593_c7/f1p0/2064-1F  | RLK-Pelle_RKF3      | PK |
| F01_cb3657_c10/f2p0/3290-2F | RLK-Pelle_LRR-XI-1  | PK |
| F01_cb3657_c4/f1p0/3466-2F  | RLK-Pelle_LRR-XI-1  | PK |
| F01_cb3657_c8/f1p0/3296-0F  | RLK-Pelle_LRR-XI-1  | PK |
| F01_cb3660_c0/f2p1/2307-0F  | RLK-Pelle_LRR-III   | PK |
| F01_cb3660_c1/f2p0/2693-0F  | RLK-Pelle_LRR-III   | PK |
| F01_cb3660_c2/f1p1/3569-0F  | RLK-Pelle_LRR-III   | PK |
| F01_cb3660_c3/f1p0/2654-2F  | RLK-Pelle_LRR-III   | PK |
| F01_cb3660_c5/f1p0/2230-0F  | RLK-Pelle_LRR-III   | PK |
| F01_cb3660_c7/f1p0/2652-1F  | RLK-Pelle_LRR-III   | PK |
| F01_cb3664_c1/f3p0/2420-1F  | CMGC_CDK-PITSLRE    | PK |
| F01_cb3664_c10/f1p0/2454-1F | CMGC_CDK-PITSLRE    | PK |
| F01_cb3664_c4/f1p2/3015-2F  | CMGC_CDK-PITSLRE    | PK |
| F01_cb3664_c6/f1p0/3060-2F  | CMGC_CDK-PITSLRE    | PK |
| F01_cb3696_c14/f1p0/3559-1F | RLK-Pelle_CrRLK1L-1 | PK |
| F01_cb3696_c18/f1p0/3409-1F | RLK-Pelle_CrRLK1L-1 | PK |
| F01_cb3696_c21/f1p1/3238-2F | RLK-Pelle_CrRLK1L-1 | PK |

---

---

|                             |                     |    |
|-----------------------------|---------------------|----|
| F01_cb3696_c22/f1p0/3426-0F | RLK-Pelle_CrRLK1L-1 | PK |
| F01_cb3696_c29/f1p0/2871-0F | RLK-Pelle_CrRLK1L-1 | PK |
| F01_cb3696_c30/f1p1/3332-0F | RLK-Pelle_CrRLK1L-1 | PK |
| F01_cb3696_c33/f1p0/3129-0F | RLK-Pelle_CrRLK1L-1 | PK |
| F01_cb3696_c33/f1p0/3129-1F | RLK-Pelle_CrRLK1L-1 | PK |
| F01_cb3696_c45/f1p0/2437-1F | RLK-Pelle_CrRLK1L-1 | PK |
| F01_cb3696_c8/f3p0/3274-1F  | RLK-Pelle_CrRLK1L-1 | PK |
| F01_cb373_c11/f1p0/3937-0F  | AGC_RSK-2           | PK |
| F01_cb373_c11/f1p0/3937-1F  | AGC_RSK-2           | PK |
| F01_cb373_c12/f1p1/3932-1F  | AGC_RSK-2           | PK |
| F01_cb373_c13/f1p0/3706-0F  | AGC_RSK-2           | PK |
| F01_cb373_c16/f1p0/3997-1F  | AGC_RSK-2           | PK |
| F01_cb373_c17/f1p0/3689-2F  | AGC_RSK-2           | PK |
| F01_cb373_c29/f1p0/4336-0F  | AGC_RSK-2           | PK |
| F01_cb373_c32/f1p0/2443-2F  | AGC_RSK-2           | PK |
| F01_cb373_c34/f1p0/4280-2F  | AGC_RSK-2           | PK |
| F01_cb373_c36/f1p0/4183-2F  | AGC_RSK-2           | PK |
| F01_cb373_c37/f1p0/4690-2F  | AGC_RSK-2           | PK |
| F01_cb373_c39/f1p0/4415-2F  | AGC_RSK-2           | PK |
| F01_cb373_c4/f2p0/3694-2F   | AGC_RSK-2           | PK |
| F01_cb373_c40/f1p0/4542-1F  | AGC_RSK-2           | PK |
| F01_cb373_c40/f1p0/4542-2F  | AGC_RSK-2           | PK |
| F01_cb373_c46/f1p0/6511-1F  | AGC_RSK-2           | PK |
| F01_cb373_c48/f1p0/5064-1F  | AGC_RSK-2           | PK |
| F01_cb373_c6/f1p0/4615-2F   | AGC_RSK-2           | PK |
| F01_cb373_c7/f1p0/3964-2F   | AGC_RSK-2           | PK |

---

---

|                            |                    |    |
|----------------------------|--------------------|----|
| F01_cb373_c8/f1p0/3698-1F  | AGC_RSK-2          | PK |
| F01_cb373_c9/f1p0/3771-0F  | AGC_RSK-2          | PK |
| F01_cb3779_c1/f1p0/2575-0F | RLK-Pelle_RLCK-VI  | PK |
| F01_cb3779_c1/f1p0/2575-1F | RLK-Pelle_RLCK-VI  | PK |
| F01_cb3854_c0/f1p0/3504-0R | TKL_Gdt            | PK |
| F01_cb3854_c1/f1p0/2568-0R | TKL_Gdt            | PK |
| F01_cb3854_c2/f1p0/2571-2R | TKL_Gdt            | PK |
| F01_cb3854_c4/f1p0/3075-1R | TKL_Gdt            | PK |
| F01_cb3854_c5/f1p0/2584-2R | TKL_Gdt            | PK |
| F01_cb3855_c1/f1p1/3561-2F | RLK-Pelle_SD-2b    | PK |
| F01_cb3855_c5/f1p0/2771-0F | RLK-Pelle_SD-2b    | PK |
| F01_cb3875_c0/f5p0/2930-2F | RLK-Pelle_LRR-I-1  | PK |
| F01_cb3875_c1/f3p1/2386-1F | RLK-Pelle_LRR-I-1  | PK |
| F01_cb3875_c2/f2p1/2402-1F | RLK-Pelle_LRR-I-1  | PK |
| F01_cb3875_c3/f2p0/2412-2F | RLK-Pelle_LRR-I-1  | PK |
| F01_cb3875_c6/f1p0/2825-0F | RLK-Pelle_LRR-I-1  | PK |
| F01_cb3875_c6/f1p0/2825-1F | RLK-Pelle_LRR-I-1  | PK |
| F01_cb3875_c7/f1p0/2347-2F | RLK-Pelle_LRR-I-1  | PK |
| F01_cb3875_c8/f1p0/2382-2F | RLK-Pelle_LRR-I-1  | PK |
| F01_cb3875_c9/f1p0/2412-1F | RLK-Pelle_LRR-I-1  | PK |
| F01_cb3897_c2/f1p0/3326-2F | RLK-Pelle_LRR-XI-1 | PK |
| F01_cb3897_c3/f1p0/3495-1F | RLK-Pelle_LRR-XI-1 | PK |
| F01_cb3903_c0/f2p0/2622-1F | CMGC_CDK-CRK7-CDK9 | PK |
| F01_cb3903_c1/f1p0/3496-0F | CMGC_CDK-CRK7-CDK9 | PK |
| F01_cb3903_c2/f1p0/3465-0F | CMGC_CDK-CRK7-CDK9 | PK |
| F01_cb3926_c1/f1p0/1927-1F | RLK-Pelle_RLCK-IXa | PK |

---

---

|                              |                    |    |
|------------------------------|--------------------|----|
| F01_cb3926_c2/flp0/3089-0F   | RLK-Pelle_RLCK-IXa | PK |
| F01_cb3926_c3/flp0/1949-2F   | RLK-Pelle_RLCK-IXa | PK |
| F01_cb3939_c10/f3p0/3353-0F  | AGC_RSK-2          | PK |
| F01_cb3939_c13/flp0/3298-0F  | AGC_RSK-2          | PK |
| F01_cb3939_c15/flp0/3290-2F  | AGC_RSK-2          | PK |
| F01_cb3939_c16/flp0/2356-0F  | AGC_RSK-2          | PK |
| F01_cb3939_c17/flp0/2467-0F  | AGC_RSK-2          | PK |
| F01_cb3939_c17/flp0/2467-1F  | AGC_RSK-2          | PK |
| F01_cb3939_c21/flp0/2607-1F  | AGC_RSK-2          | PK |
| F01_cb3939_c27/flp0/2215-1F  | AGC_RSK-2          | PK |
| F01_cb3939_c27/flp0/2215-2F  | AGC_RSK-2          | PK |
| F01_cb3939_c29/flp0/2382-2F  | AGC_RSK-2          | PK |
| F01_cb3939_c32/flp0/2860-1F  | AGC_RSK-2          | PK |
| F01_cb3939_c39/f6p0/2469-0F  | AGC_RSK-2          | PK |
| F01_cb3939_c42/fl3p1/2456-0F | AGC_RSK-2          | PK |
| F01_cb396_c10/f3p0/2297-2F   | CAMK_CDPK          | PK |
| F01_cb396_c16/flp0/2356-1F   | CAMK_CDPK          | PK |
| F01_cb396_c18/flp0/2281-0F   | CAMK_CDPK          | PK |
| F01_cb396_c19/flp0/2179-0F   | CAMK_CDPK          | PK |
| F01_cb396_c19/flp0/2179-1F   | CAMK_CDPK          | PK |
| F01_cb396_c25/flp0/3318-0F   | CAMK_CDPK          | PK |
| F01_cb396_c29/flp0/2646-2F   | CAMK_CDPK          | PK |
| F01_cb396_c30/flp0/2423-0F   | CAMK_CDPK          | PK |
| F01_cb396_c30/flp0/2423-2F   | CAMK_CDPK          | PK |
| F01_cb396_c4/f9p0/2621-0F    | CAMK_CDPK          | PK |
| F01_cb396_c41/flp0/2356-1F   | CAMK_CDPK          | PK |

---

---

|                             |                  |    |
|-----------------------------|------------------|----|
| F01_cb396_c42/flp0/2343-0F  | CAMK_CDPK        | PK |
| F01_cb396_c45/flp0/2634-2F  | CAMK_CDPK        | PK |
| F01_cb396_c48/flp0/2172-2F  | CAMK_CDPK        | PK |
| F01_cb396_c49/flp0/3077-2F  | CAMK_CDPK        | PK |
| F01_cb396_c50/flp0/2950-0F  | CAMK_CDPK        | PK |
| F01_cb396_c51/flp1/2465-2F  | CAMK_CDPK        | PK |
| F01_cb396_c57/flp0/2029-0F  | CAMK_CDPK        | PK |
| F01_cb396_c67/f28p0/2542-0F | CAMK_CDPK        | PK |
| F01_cb3988_c0/f2p0/3006-0F  | RLK-Pelle_PERK-1 | PK |
| F01_cb3988_c1/flp1/3470-1F  | RLK-Pelle_PERK-1 | PK |
| F01_cb3988_c15/flp0/2853-0F | RLK-Pelle_PERK-1 | PK |
| F01_cb3988_c5/flp0/3981-0F  | RLK-Pelle_PERK-1 | PK |
| F01_cb3988_c6/flp0/2823-0F  | RLK-Pelle_PERK-1 | PK |
| F01_cb3988_c7/flp1/3083-0F  | RLK-Pelle_PERK-1 | PK |
| F01_cb3988_c9/flp0/2730-1F  | RLK-Pelle_PERK-1 | PK |
| F01_cb3988_c9/flp0/2730-2F  | RLK-Pelle_PERK-1 | PK |
| F01_cb3993_c0/flp0/3469-1F  | RLK-Pelle_RLCK-V | PK |
| F01_cb3993_c2/flp0/1723-0F  | RLK-Pelle_RLCK-V | PK |
| F01_cb4016_c10/flp0/2636-0F | RLK-Pelle_DLSV   | PK |
| F01_cb4016_c10/flp0/2636-2F | RLK-Pelle_DLSV   | PK |
| F01_cb4016_c11/flp0/2688-2F | RLK-Pelle_DLSV   | PK |
| F01_cb4016_c12/flp0/2681-2F | RLK-Pelle_DLSV   | PK |
| F01_cb4016_c14/flp0/2928-0F | RLK-Pelle_DLSV   | PK |
| F01_cb4016_c14/flp0/2928-1F | RLK-Pelle_DLSV   | PK |
| F01_cb4016_c14/flp0/2928-2F | RLK-Pelle_DLSV   | PK |
| F01_cb4016_c15/flp1/2488-1F | RLK-Pelle_DLSV   | PK |

---

---

|                             |                    |    |
|-----------------------------|--------------------|----|
| F01_cb4016_c16/f3p2/2553-1F | RLK-Pelle_DLSV     | PK |
| F01_cb4016_c17/flp0/2709-0F | RLK-Pelle_DLSV     | PK |
| F01_cb4016_c17/flp0/2709-2F | RLK-Pelle_DLSV     | PK |
| F01_cb4016_c18/flp0/2605-1F | RLK-Pelle_DLSV     | PK |
| F01_cb4016_c18/flp0/2605-2F | RLK-Pelle_DLSV     | PK |
| F01_cb4016_c19/flp0/2644-1F | RLK-Pelle_DLSV     | PK |
| F01_cb4016_c19/flp0/2644-2F | RLK-Pelle_DLSV     | PK |
| F01_cb4016_c2/f3p1/2863-1F  | RLK-Pelle_DLSV     | PK |
| F01_cb4016_c20/flp1/2959-1F | RLK-Pelle_DLSV     | PK |
| F01_cb4016_c24/flp0/2450-1F | RLK-Pelle_DLSV     | PK |
| F01_cb4016_c24/flp0/2450-2F | RLK-Pelle_DLSV     | PK |
| F01_cb4016_c27/flp1/3204-0F | RLK-Pelle_DLSV     | PK |
| F01_cb4016_c27/flp1/3204-1F | RLK-Pelle_DLSV     | PK |
| F01_cb4016_c29/flp0/2693-1F | RLK-Pelle_DLSV     | PK |
| F01_cb4016_c3/f2p0/2850-0F  | RLK-Pelle_DLSV     | PK |
| F01_cb4016_c30/flp1/3132-1F | RLK-Pelle_DLSV     | PK |
| F01_cb4016_c31/flp0/2568-2F | RLK-Pelle_DLSV     | PK |
| F01_cb4016_c32/flp0/1913-1F | RLK-Pelle_DLSV     | PK |
| F01_cb4016_c33/flp0/2507-1F | RLK-Pelle_DLSV     | PK |
| F01_cb4016_c34/flp0/2560-0F | RLK-Pelle_DLSV     | PK |
| F01_cb4016_c34/flp0/2560-2F | RLK-Pelle_DLSV     | PK |
| F01_cb4016_c35/flp0/2920-0F | RLK-Pelle_DLSV     | PK |
| F01_cb4016_c38/flp0/2815-1F | RLK-Pelle_DLSV     | PK |
| F01_cb4016_c41/flp0/3118-0F | RLK-Pelle_LRR-Xb-1 | PK |
| F01_cb4016_c42/flp1/2580-2F | RLK-Pelle_DLSV     | PK |
| F01_cb4016_c43/flp0/2750-2F | RLK-Pelle_DLSV     | PK |

---

---

|                             |                     |    |
|-----------------------------|---------------------|----|
| F01_cb4016_c45/flp0/6266-0F | RLK-Pelle_DLSV      | PK |
| F01_cb4016_c5/flp0/3485-1F  | RLK-Pelle_DLSV      | PK |
| F01_cb4016_c6/flp1/2956-1F  | RLK-Pelle_DLSV      | PK |
| F01_cb4016_c7/flp0/2879-0F  | RLK-Pelle_DLSV      | PK |
| F01_cb4016_c8/flp0/2818-0F  | RLK-Pelle_RKF3      | PK |
| F01_cb4016_c8/flp0/2818-1F  | RLK-Pelle_DLSV      | PK |
| F01_cb4016_c9/flp1/2685-0F  | RLK-Pelle_DLSV      | PK |
| F01_cb4019_c0/f2p0/3413-1F  | RLK-Pelle_Singleton | PK |
| F01_cb4048_c1/flp1/3452-1F  | RLK-Pelle_LRR-XI-1  | PK |
| F01_cb4048_c1/flp1/3452-2F  | RLK-Pelle_LRR-XI-1  | PK |
| F01_cb4065_c0/flp0/3449-1F  | RLK-Pelle_LRR-I-1   | PK |
| F01_cb4065_c0/flp0/3449-2F  | RLK-Pelle_LRR-I-1   | PK |
| F01_cb4065_c1/flp0/3012-0F  | RLK-Pelle_LRR-I-1   | PK |
| F01_cb4067_c11/flp0/2801-2F | AGC_RSK-2           | PK |
| F01_cb4067_c2/flp1/3451-0F  | AGC_RSK-2           | PK |
| F01_cb4067_c7/flp0/3749-1F  | AGC_RSK-2           | PK |
| F01_cb4067_c8/flp0/3375-2F  | AGC_RSK-2           | PK |
| F01_cb4113_c14/flp0/3280-1F | RLK-Pelle_LRR-V     | PK |
| F01_cb4113_c2/flp1/3393-0F  | RLK-Pelle_LRR-V     | PK |
| F01_cb4113_c2/flp1/3393-1F  | RLK-Pelle_LRR-V     | PK |
| F01_cb4113_c2/flp1/3393-2F  | RLK-Pelle_LRR-V     | PK |
| F01_cb4113_c21/flp0/2899-1F | RLK-Pelle_LRR-V     | PK |
| F01_cb4113_c4/flp0/3418-1F  | RLK-Pelle_LRR-V     | PK |
| F01_cb4113_c7/flp0/3435-2F  | RLK-Pelle_LRR-V     | PK |
| F01_cb4113_c8/flp0/3143-2F  | RLK-Pelle_LRR-V     | PK |
| F01_cb4113_c9/flp0/3342-1F  | RLK-Pelle_LRR-V     | PK |

---



---

|                             |                    |    |
|-----------------------------|--------------------|----|
| F01_cb4162_c0/flp0/3247-2F  | CMGC_CDK-CRK7-CDK9 | PK |
| F01_cb4162_c2/flp1/3150-1F  | CMGC_CDK-CRK7-CDK9 | PK |
| F01_cb4162_c3/flp0/3138-1F  | CMGC_CDK-CRK7-CDK9 | PK |
| F01_cb416_c14/flp0/2799-2F  | SCY1_SCYL1         | PK |
| F01_cb416_c19/flp0/2939-2F  | SCY1_SCYL1         | PK |
| F01_cb416_c21/flp0/3162-0F  | SCY1_SCYL1         | PK |
| F01_cb416_c26/flp0/3038-1F  | SCY1_SCYL1         | PK |
| F01_cb416_c28/flp0/2988-1F  | SCY1_SCYL1         | PK |
| F01_cb416_c31/flp0/3143-2F  | SCY1_SCYL1         | PK |
| F01_cb416_c36/flp0/3277-2F  | SCY1_SCYL1         | PK |
| F01_cb416_c40/flp0/3116-1F  | SCY1_SCYL1         | PK |
| F01_cb416_c41/flp0/3183-0F  | SCY1_SCYL1         | PK |
| F01_cb416_c49/flp0/3164-1F  | SCY1_SCYL1         | PK |
| F01_cb416_c51/flp0/2774-0F  | SCY1_SCYL1         | PK |
| F01_cb416_c53/flp0/2998-0F  | SCY1_SCYL1         | PK |
| F01_cb416_c55/flp1/2871-1F  | SCY1_SCYL1         | PK |
| F01_cb416_c62/flp0/2875-1F  | SCY1_SCYL1         | PK |
| F01_cb416_c68/f2p0/3419-0F  | SCY1_SCYL1         | PK |
| F01_cb416_c73/f3p0/3007-1F  | SCY1_SCYL1         | PK |
| F01_cb4201_c10/flp0/2976-0F | RLK-Pelle_RLCK-IXb | PK |
| F01_cb4201_c19/flp0/2906-1F | RLK-Pelle_RLCK-IXb | PK |
| F01_cb4201_c19/flp0/2906-2F | RLK-Pelle_RLCK-IXb | PK |
| F01_cb4201_c2/flp0/3072-0F  | RLK-Pelle_RLCK-IXb | PK |
| F01_cb4201_c4/f5p0/2972-0F  | RLK-Pelle_RLCK-IXb | PK |
| F01_cb4208_c10/flp0/1764-1F | CAMK_OST1L         | PK |
| F01_cb4208_c11/flp0/1696-0F | CAMK_OST1L         | PK |

---

---

|                              |                    |    |
|------------------------------|--------------------|----|
| F01_cb4208_c11/flp0/1696-1F  | CAMK_OST1L         | PK |
| F01_cb4208_c16/flp0/1531-1F  | CAMK_OST1L         | PK |
| F01_cb4208_c16/flp0/1531-2F  | CAMK_OST1L         | PK |
| F01_cb4208_c2/flp0/3403-1F   | CAMK_OST1L         | PK |
| F01_cb4208_c2/flp0/3403-2F   | CAMK_OST1L         | PK |
| F01_cb4208_c3/flp0/2074-0F   | CAMK_OST1L         | PK |
| F01_cb4208_c3/flp0/2074-2F   | CAMK_OST1L         | PK |
| F01_cb4208_c5/flp0/1950-2F   | CAMK_OST1L         | PK |
| F01_cb4208_c7/flp0/2028-0F   | CAMK_OST1L         | PK |
| F01_cb4208_c8/flp0/1816-1F   | CAMK_OST1L         | PK |
| F01_cb4219_c1/flp0/3397-1F   | RLK-Pelle_PERK-2   | PK |
| F01_cb4221_c0/f4p0/3358-1F   | RLK-Pelle_LRR-XI-1 | PK |
| F01_cb4221_c3/flp0/3924-0F   | RLK-Pelle_LRR-XI-1 | PK |
| F01_cb4221_c3/flp0/3924-1F   | RLK-Pelle_LRR-XI-1 | PK |
| F01_cb4221_c4/flp1/3385-0F   | RLK-Pelle_LRR-XI-1 | PK |
| F01_cb4221_c4/flp1/3385-2F   | RLK-Pelle_LRR-XI-1 | PK |
| F01_cb4233_c106/flp2/3225-0F | RLK-Pelle_L-LEC    | PK |
| F01_cb4233_c107/flp0/2385-0F | RLK-Pelle_L-LEC    | PK |
| F01_cb4233_c107/flp0/2385-1F | RLK-Pelle_L-LEC    | PK |
| F01_cb4233_c109/flp3/2092-0F | RLK-Pelle_L-LEC    | PK |
| F01_cb4233_c110/flp1/2847-1F | RLK-Pelle_L-LEC    | PK |
| F01_cb4233_c111/flp0/2330-0F | RLK-Pelle_L-LEC    | PK |
| F01_cb4233_c112/flp0/2252-1F | RLK-Pelle_L-LEC    | PK |
| F01_cb4233_c164/flp1/2453-0F | RLK-Pelle_L-LEC    | PK |
| F01_cb4233_c168/flp1/2096-1F | RLK-Pelle_L-LEC    | PK |
| F01_cb4233_c168/flp1/2096-1R | RLK-Pelle_L-LEC    | PK |

---

---

|                               |                    |    |
|-------------------------------|--------------------|----|
| F01_cb4233_c168/f1p1/2096-2F  | RLK-Pelle_L-LEC    | PK |
| F01_cb4233_c17/f3p0/2228-2F   | RLK-Pelle_L-LEC    | PK |
| F01_cb4233_c230/f1p2/2315-2F  | RLK-Pelle_L-LEC    | PK |
| F01_cb4233_c232/f1p0/2301-2F  | RLK-Pelle_L-LEC    | PK |
| F01_cb4233_c239/f16p1/2275-0F | RLK-Pelle_L-LEC    | PK |
| F01_cb4233_c240/f11p1/2257-0F | RLK-Pelle_L-LEC    | PK |
| F01_cb4233_c248/f2p0/2257-1F  | RLK-Pelle_L-LEC    | PK |
| F01_cb4233_c248/f2p0/2257-2F  | RLK-Pelle_L-LEC    | PK |
| F01_cb4233_c38/f2p0/2432-0F   | RLK-Pelle_L-LEC    | PK |
| F01_cb4233_c89/f1p1/3782-2F   | RLK-Pelle_L-LEC    | PK |
| F01_cb4233_c90/f1p2/2913-1F   | RLK-Pelle_L-LEC    | PK |
| F01_cb4233_c92/f1p1/2467-0F   | RLK-Pelle_L-LEC    | PK |
| F01_cb4233_c92/f1p1/2467-2F   | RLK-Pelle_L-LEC    | PK |
| F01_cb4233_c94/f1p0/2460-0F   | RLK-Pelle_L-LEC    | PK |
| F01_cb4233_c94/f1p0/2460-1F   | RLK-Pelle_L-LEC    | PK |
| F01_cb4233_c97/f1p1/2296-1F   | RLK-Pelle_L-LEC    | PK |
| F01_cb425_c1/f1p1/4818-2F     | AGC_MAST           | PK |
| F01_cb425_c3/f1p2/4514-0F     | AGC_MAST           | PK |
| F01_cb4260_c1/f1p0/3391-2F    | RLK-Pelle_LRR-III  | PK |
| F01_cb4260_c2/f2p2/2188-1F    | RLK-Pelle_LRR-III  | PK |
| F01_cb4260_c4/f2p2/2217-1F    | RLK-Pelle_LRR-III  | PK |
| F01_cb4260_c5/f1p1/2120-2F    | RLK-Pelle_LRR-III  | PK |
| F01_cb4265_c0/f2p1/3418-1F    | RLK-Pelle_LRR-XI-1 | PK |
| F01_cb4265_c1/f1p0/2567-2F    | RLK-Pelle_LRR-XI-1 | PK |
| F01_cb4272_c10/f1p0/2431-1F   | AGC_NDR            | PK |
| F01_cb4272_c11/f1p0/2448-2F   | AGC_NDR            | PK |

---

---

|                             |                     |    |
|-----------------------------|---------------------|----|
| F01_cb4272_c13/f1p0/2415-1F | AGC_NDR             | PK |
| F01_cb4272_c15/f1p0/2056-0F | AGC_NDR             | PK |
| F01_cb4272_c17/f3p0/2418-1F | AGC_NDR             | PK |
| F01_cb4272_c5/f1p0/3380-1F  | AGC_NDR             | PK |
| F01_cb4272_c7/f1p0/2177-1F  | AGC_NDR             | PK |
| F01_cb4272_c9/f1p0/2343-0F  | AGC_NDR             | PK |
| F01_cb4275_c0/f2p0/3202-0F  | RLK-Pelle_LRR-VII-1 | PK |
| F01_cb4275_c2/f1p0/2002-0F  | RLK-Pelle_LRR-VII-1 | PK |
| F01_cb4349_c0/f2p0/2456-0F  | RLK-Pelle_LRR-Xb-1  | PK |
| F01_cb4349_c0/f2p0/2456-1F  | RLK-Pelle_LRR-Xb-1  | PK |
| F01_cb4349_c1/f1p0/3370-1F  | RLK-Pelle_LRR-Xb-1  | PK |
| F01_cb4349_c2/f1p0/2461-0F  | RLK-Pelle_LRR-Xb-1  | PK |
| F01_cb4375_c1/f2p1/3160-1F  | RLK-Pelle_LRR-XI-1  | PK |
| F01_cb4375_c3/f1p0/3653-2F  | RLK-Pelle_LRR-XI-1  | PK |
| F01_cb4375_c4/f1p0/3606-2F  | RLK-Pelle_LRR-XI-1  | PK |
| F01_cb4375_c5/f1p0/3262-0F  | RLK-Pelle_LRR-XI-1  | PK |
| F01_cb4375_c5/f1p0/3262-1F  | RLK-Pelle_LRR-XI-1  | PK |
| F01_cb4375_c6/f1p0/2971-0F  | RLK-Pelle_LRR-XI-1  | PK |
| F01_cb4375_c7/f1p0/3057-1F  | RLK-Pelle_LRR-XI-1  | PK |
| F01_cb4461_c1/f2p1/2671-0F  | RLK-Pelle_RLCK-IXb  | PK |
| F01_cb4461_c10/f2p2/2767-0F | RLK-Pelle_RLCK-IXb  | PK |
| F01_cb4461_c2/f1p2/3341-1F  | RLK-Pelle_RLCK-IXb  | PK |
| F01_cb4461_c3/f1p2/2896-2F  | RLK-Pelle_RLCK-IXb  | PK |
| F01_cb4461_c4/f1p2/2844-0F  | RLK-Pelle_RLCK-IXb  | PK |
| F01_cb4461_c7/f1p2/2804-2F  | RLK-Pelle_RLCK-IXb  | PK |
| F01_cb4461_c9/f1p1/1818-0F  | RLK-Pelle_RLCK-IXb  | PK |

---

---

|                            |                     |    |
|----------------------------|---------------------|----|
| F01_cb4461_c9/f1p1/1818-1F | RLK-Pelle_RLCK-IXb  | PK |
| F01_cb4482_c0/f1p0/3335-1F | RLK-Pelle_SD-2b     | PK |
| F01_cb4482_c1/f1p0/2752-2F | RLK-Pelle_SD-2b     | PK |
| F01_cb4482_c2/f1p0/2586-1F | RLK-Pelle_SD-2b     | PK |
| F01_cb4482_c4/f1p0/2722-0F | RLK-Pelle_SD-2b     | PK |
| F01_cb4483_c0/f2p0/2583-0F | RLK-Pelle_SD-2b     | PK |
| F01_cb4483_c1/f1p0/3291-0F | RLK-Pelle_SD-2b     | PK |
| F01_cb4483_c1/f1p0/3291-1F | RLK-Pelle_SD-2b     | PK |
| F01_cb4483_c2/f1p0/3162-1F | RLK-Pelle_SD-2b     | PK |
| F01_cb4483_c3/f1p0/2625-2F | RLK-Pelle_SD-2b     | PK |
| F01_cb4486_c0/f1p0/3330-2F | RLK-Pelle_DLSV      | PK |
| F01_cb4486_c1/f1p0/3190-2F | RLK-Pelle_DLSV      | PK |
| F01_cb450_c1/f2p2/4660-2F  | RLK-Pelle_CrRLK1L-1 | PK |
| F01_cb450_c4/f1p1/4687-0F  | RLK-Pelle_CrRLK1L-1 | PK |
| F01_cb450_c5/f1p1/3647-0F  | RLK-Pelle_CrRLK1L-1 | PK |
| F01_cb4543_c0/f1p0/3310-1R | RLK-Pelle_DLSV      | PK |
| F01_cb4543_c0/f1p0/3310-2R | RLK-Pelle_DLSV      | PK |
| F01_cb4543_c1/f1p0/3821-0R | RLK-Pelle_DLSV      | PK |
| F01_cb4543_c1/f1p0/3821-1R | RLK-Pelle_DLSV      | PK |
| F01_cb4543_c1/f1p0/3821-2R | RLK-Pelle_DLSV      | PK |
| F01_cb4543_c2/f1p0/2903-2R | RLK-Pelle_DLSV      | PK |
| F01_cb4559_c3/f1p0/3310-0F | CMGC_CK2            | PK |
| F01_cb4559_c3/f1p0/3310-1F | CMGC_CK2            | PK |
| F01_cb4559_c4/f1p0/3029-0F | CMGC_CK2            | PK |
| F01_cb4559_c4/f1p0/3029-1F | CMGC_CK2            | PK |
| F01_cb4559_c5/f1p0/2844-0F | CMGC_CK2            | PK |

---

---

|                              |                       |    |
|------------------------------|-----------------------|----|
| F01_cb4559_c6/flp0/1326-1F   | CMGC_CK2              | PK |
| F01_cb4559_c7/flp0/1283-0F   | CMGC_CK2              | PK |
| F01_cb4559_c9/flp0/1461-0F   | CMGC_CK2              | PK |
| F01_cb4563_c10/flp1/4024-1F  | RLK-Pelle_RLCK-IXb    | PK |
| F01_cb4563_c10/flp1/4024-2F  | RLK-Pelle_RLCK-IXb    | PK |
| F01_cb4563_c12/flp0/3843-2F  | RLK-Pelle_RLCK-IXb    | PK |
| F01_cb4563_c16/flp2/3314-1F  | RLK-Pelle_RLCK-IXb    | PK |
| F01_cb4563_c16/flp2/3314-2F  | RLK-Pelle_RLCK-IXb    | PK |
| F01_cb4563_c17/flp0/2816-0F  | RLK-Pelle_RLCK-IXb    | PK |
| F01_cb4563_c17/flp0/2816-1F  | RLK-Pelle_RLCK-IXb    | PK |
| F01_cb4563_c22/flp0/3155-1F  | RLK-Pelle_RLCK-IXb    | PK |
| F01_cb4563_c27/flp0/2598-1F  | RLK-Pelle_RLCK-IXb    | PK |
| F01_cb4563_c29/flp0/2820-0F  | RLK-Pelle_RLCK-IXb    | PK |
| F01_cb4563_c32/flp0/2938-1F  | RLK-Pelle_RLCK-IXb    | PK |
| F01_cb4563_c32/flp0/2938-2F  | RLK-Pelle_RLCK-IXb    | PK |
| F01_cb4563_c33/flp0/2825-2F  | RLK-Pelle_RLCK-IXb    | PK |
| F01_cb4563_c36/f7p0/2932-0F  | RLK-Pelle_RLCK-IXb    | PK |
| F01_cb4563_c37/f5p0/2841-2F  | RLK-Pelle_RLCK-IXb    | PK |
| F01_cb4563_c6/f6p1/3275-0F   | RLK-Pelle_RLCK-IXb    | PK |
| F01_cb4563_c8/f2p2/2875-2F   | RLK-Pelle_RLCK-IXb    | PK |
| F01_cb4563_c9/flp0/3283-1F   | RLK-Pelle_RLCK-IXb    | PK |
| F01_cb4576_c125/flp0/2012-2F | RLK-Pelle_RLCK-VIIa-2 | PK |
| F01_cb4576_c128/flp0/2398-1F | RLK-Pelle_RLCK-VIIa-2 | PK |
| F01_cb4576_c134/flp0/2248-1F | RLK-Pelle_RLCK-VIIa-2 | PK |
| F01_cb4576_c16/f2p1/1879-0F  | RLK-Pelle_RLCK-VIIa-2 | PK |
| F01_cb4576_c18/f2p0/1935-2F  | RLK-Pelle_RLCK-VIIa-2 | PK |

---

---

|                             |                       |    |
|-----------------------------|-----------------------|----|
| F01_cb4576_c69/flp0/4561-0F | STE_STE7              | PK |
| F01_cb4576_c73/flp1/3381-0F | RLK-Pelle_RLCK-VIIa-2 | PK |
| F01_cb4576_c73/flp1/3381-2F | RLK-Pelle_RLCK-VIIa-2 | PK |
| F01_cb4576_c95/flp0/2097-2F | RLK-Pelle_RLCK-VIIa-2 | PK |
| F01_cb4634_c14/flp0/2408-1F | CK1_CK1               | PK |
| F01_cb4634_c15/flp0/3263-2F | CK1_CK1               | PK |
| F01_cb4634_c17/flp0/2349-1F | CK1_CK1               | PK |
| F01_cb4634_c18/flp0/3191-2F | CK1_CK1               | PK |
| F01_cb4634_c3/flp0/3290-0F  | CK1_CK1               | PK |
| F01_cb4634_c4/flp0/3075-1F  | CK1_CK1               | PK |
| F01_cb4634_c5/flp0/3037-2F  | CK1_CK1               | PK |
| F01_cb4634_c6/flp0/2211-2F  | CK1_CK1               | PK |
| F01_cb4634_c7/f2p0/2230-0F  | CK1_CK1               | PK |
| F01_cb4634_c8/flp0/2660-1F  | CK1_CK1               | PK |
| F01_cb4634_c9/flp0/2221-1F  | CK1_CK1               | PK |
| F01_cb4641_c10/flp0/2354-2F | RLK-Pelle_LRK10L-2    | PK |
| F01_cb4641_c12/flp1/2986-0F | RLK-Pelle_LRK10L-2    | PK |
| F01_cb4641_c12/flp1/2986-2F | RLK-Pelle_LRK10L-2    | PK |
| F01_cb4641_c17/flp0/2432-0F | RLK-Pelle_LRK10L-2    | PK |
| F01_cb4641_c18/flp0/2337-0F | RLK-Pelle_LRK10L-2    | PK |
| F01_cb4641_c2/f2p1/2256-2F  | RLK-Pelle_LRK10L-2    | PK |
| F01_cb4641_c3/f2p1/2387-0F  | RLK-Pelle_LRK10L-2    | PK |
| F01_cb4641_c4/f2p1/2180-2F  | RLK-Pelle_LRK10L-2    | PK |
| F01_cb4641_c6/flp0/3294-0F  | RLK-Pelle_LRK10L-2    | PK |
| F01_cb4641_c7/flp1/2278-1F  | RLK-Pelle_LRK10L-2    | PK |
| F01_cb4641_c8/flp1/2416-1F  | RLK-Pelle_LRK10L-2    | PK |

---

---

|                            |                       |    |
|----------------------------|-----------------------|----|
| F01_cb4641_c9/f1p0/3152-0F | RLK-Pelle_LRK10L-2    | PK |
| F01_cb4644_c1/f1p0/3405-0F | RLK-Pelle_LRR-XI-1    | PK |
| F01_cb4657_c7/f1p0/4018-0R | RLK-Pelle_SD-2b       | PK |
| F01_cb4657_c8/f1p0/3762-0R | RLK-Pelle_SD-2b       | PK |
| F01_cb4657_c8/f1p0/3762-2R | RLK-Pelle_SD-2b       | PK |
| F01_cb4657_c9/f1p0/3253-0R | RLK-Pelle_SD-2b       | PK |
| F01_cb4658_c0/f1p0/3289-1F | RLK-Pelle_CrRLK1L-1   | PK |
| F01_cb4658_c1/f1p0/2992-1F | RLK-Pelle_CrRLK1L-1   | PK |
| F01_cb4680_c0/f1p0/3288-2F | RLK-Pelle_SD-2b       | PK |
| F01_cb4680_c1/f1p0/3024-2F | RLK-Pelle_SD-2b       | PK |
| F01_cb4680_c2/f1p0/2712-1F | RLK-Pelle_SD-2b       | PK |
| F01_cb4692_c0/f5p1/1918-1F | RLK-Pelle_RLCK-VIIa-2 | PK |
| F01_cb4692_c1/f1p0/3283-2F | RLK-Pelle_RLCK-VIIa-2 | PK |
| F01_cb4692_c2/f1p1/1855-0F | RLK-Pelle_RLCK-VIIa-2 | PK |
| F01_cb4692_c4/f1p0/1054-0F | RLK-Pelle_RLCK-VIIa-2 | PK |
| F01_cb4758_c0/f1p0/3264-1F | RLK-Pelle_LRR-XII-1   | PK |
| F01_cb4758_c1/f1p0/3083-1F | RLK-Pelle_LRR-XII-1   | PK |
| F01_cb4758_c1/f1p0/3083-2F | RLK-Pelle_LRR-XII-1   | PK |
| F01_cb4758_c3/f1p0/3403-1F | RLK-Pelle_LRR-XII-1   | PK |
| F01_cb4758_c3/f1p0/3403-2F | RLK-Pelle_LRR-XII-1   | PK |
| F01_cb4758_c4/f1p0/2881-1F | RLK-Pelle_LRR-XII-1   | PK |
| F01_cb4758_c5/f1p0/3624-1F | RLK-Pelle_LRR-XII-1   | PK |
| F01_cb4771_c1/f3p0/3144-1F | RLK-Pelle_LRR-IX      | PK |
| F01_cb4771_c2/f1p0/3261-0F | RLK-Pelle_LRR-IX      | PK |
| F01_cb4771_c2/f1p0/3261-2F | RLK-Pelle_LRR-IX      | PK |
| F01_cb4771_c3/f1p0/3275-1F | RLK-Pelle_LRR-IX      | PK |

---



---

|                             |                        |    |
|-----------------------------|------------------------|----|
| F01_cb4771_c5/flp0/2633-1F  | RLK-Pelle_LRR-IX       | PK |
| F01_cb4771_c6/flp0/1174-2F  | RLK-Pelle_LRR-IX       | PK |
| F01_cb4774_c11/flp0/3257-0F | CK1_CK1-PI             | PK |
| F01_cb4774_c13/flp0/2724-1F | CK1_CK1-PI             | PK |
| F01_cb4774_c16/flp0/2562-1F | CK1_CK1-PI             | PK |
| F01_cb4774_c20/flp1/2938-2F | CK1_CK1-PI             | PK |
| F01_cb4774_c29/flp0/3161-2F | CK1_CK1-PI             | PK |
| F01_cb4774_c30/flp0/2823-1F | CK1_CK1-PI             | PK |
| F01_cb4774_c33/flp2/2849-1F | CK1_CK1-PI             | PK |
| F01_cb4774_c34/flp0/3232-0F | CK1_CK1-PI             | PK |
| F01_cb4774_c37/flp0/3038-1F | CK1_CK1-PI             | PK |
| F01_cb4774_c40/flp0/3021-2F | CK1_CK1-PI             | PK |
| F01_cb4774_c43/flp0/3179-1F | CK1_CK1-PI             | PK |
| F01_cb4789_c2/flp0/2371-1F  | RLK-Pelle_WAK_LRK10L-1 | PK |
| F01_cb4789_c4/flp0/2272-1F  | RLK-Pelle_WAK_LRK10L-1 | PK |
| F01_cb4805_c0/f4p0/2407-0F  | STE_STE7               | PK |
| F01_cb4805_c1/f3p0/2556-0F  | STE_STE7               | PK |
| F01_cb4805_c11/flp0/2332-1F | STE_STE7               | PK |
| F01_cb4805_c12/flp0/3191-0F | STE_STE7               | PK |
| F01_cb4805_c13/flp0/3131-0F | STE_STE7               | PK |
| F01_cb4805_c14/flp0/2808-0F | STE_STE7               | PK |
| F01_cb4805_c15/flp0/2174-2F | STE_STE7               | PK |
| F01_cb4805_c16/flp0/2879-0F | STE_STE7               | PK |
| F01_cb4805_c17/flp0/2451-1F | STE_STE7               | PK |
| F01_cb4805_c18/flp0/2325-0F | STE_STE7               | PK |
| F01_cb4805_c19/flp0/2494-1F | STE_STE7               | PK |

---

---

|                             |                    |    |
|-----------------------------|--------------------|----|
| F01_cb4805_c24/flp0/1798-2F | STE_STE7           | PK |
| F01_cb4805_c27/flp0/1186-2F | STE_STE7           | PK |
| F01_cb4805_c5/flp0/3640-0F  | STE_STE7           | PK |
| F01_cb4805_c5/flp0/3640-2F  | STE_STE7           | PK |
| F01_cb4805_c7/flp0/2117-0F  | STE_STE7           | PK |
| F01_cb4805_c9/flp0/3065-0F  | STE_STE7           | PK |
| F01_cb4805_c9/flp0/3065-2F  | STE_STE7           | PK |
| F01_cb4834_c10/flp0/3243-0F | CK1_CK1-PI         | PK |
| F01_cb4834_c13/flp2/2756-2F | CK1_CK1-PI         | PK |
| F01_cb4834_c14/flp1/2790-1F | CK1_CK1-PI         | PK |
| F01_cb4834_c31/flp0/2857-0F | CK1_CK1-PI         | PK |
| F01_cb4834_c36/flp0/2620-2F | CK1_CK1-PI         | PK |
| F01_cb4834_c37/flp0/3014-2F | CK1_CK1-PI         | PK |
| F01_cb4834_c38/flp0/2881-1F | CK1_CK1-PI         | PK |
| F01_cb4834_c39/flp0/2850-1F | CK1_CK1-PI         | PK |
| F01_cb4834_c44/flp1/2977-1F | CK1_CK1-PI         | PK |
| F01_cb4834_c5/f3p0/2725-2F  | CK1_CK1-PI         | PK |
| F01_cb4834_c6/f3p0/2838-2F  | CK1_CK1-PI         | PK |
| F01_cb4834_c8/f2p0/2788-2F  | CK1_CK1-PI         | PK |
| F01_cb4834_c9/f2p4/2896-2F  | CK1_CK1-PI         | PK |
| F01_cb4871_c0/f2p0/3053-1F  | RLK-Pelle_LRR-VI-1 | PK |
| F01_cb4871_c1/f2p0/3169-0F  | RLK-Pelle_LRR-VI-1 | PK |
| F01_cb4871_c3/flp0/3099-2F  | RLK-Pelle_LRR-VI-1 | PK |
| F01_cb4871_c7/flp0/1266-1F  | RLK-Pelle_LRR-VI-1 | PK |
| F01_cb4877_c1/f2p1/2369-2F  | RLK-Pelle_L-LEC    | PK |
| F01_cb4877_c2/flp0/3363-0F  | RLK-Pelle_L-LEC    | PK |

---

---

|                             |                       |    |
|-----------------------------|-----------------------|----|
| F01_cb4877_c2/f1p0/3363-2F  | RLK-Pelle_L-LEC       | PK |
| F01_cb4877_c3/f1p0/2888-2F  | RLK-Pelle_L-LEC       | PK |
| F01_cb4877_c4/f1p1/2530-2F  | RLK-Pelle_L-LEC       | PK |
| F01_cb4877_c5/f1p0/1889-0F  | RLK-Pelle_L-LEC       | PK |
| F01_cb4877_c5/f1p0/1889-1F  | RLK-Pelle_L-LEC       | PK |
| F01_cb4880_c0/f5p1/3228-2F  | RLK-Pelle_LRR-XI-1    | PK |
| F01_cb4880_c1/f1p0/2414-2F  | RLK-Pelle_LRR-XI-1    | PK |
| F01_cb4880_c2/f1p0/2038-0F  | RLK-Pelle_LRR-XI-1    | PK |
| F01_cb4893_c0/f7p1/2413-1F  | RLK-Pelle_RLCK-VIIa-1 | PK |
| F01_cb4893_c1/f5p0/2291-2F  | RLK-Pelle_RLCK-VIIa-1 | PK |
| F01_cb4893_c13/f1p0/2332-1F | RLK-Pelle_RLCK-VIIa-1 | PK |
| F01_cb4893_c3/f1p0/3233-1F  | RLK-Pelle_RLCK-VIIa-1 | PK |
| F01_cb4893_c5/f1p0/2367-0F  | RLK-Pelle_RLCK-VIIa-1 | PK |
| F01_cb4893_c7/f1p1/2506-1F  | RLK-Pelle_RLCK-VIIa-1 | PK |
| F01_cb4893_c7/f1p1/2506-2F  | RLK-Pelle_RLCK-VIIa-1 | PK |
| F01_cb4975_c0/f3p0/3181-0F  | RLK-Pelle_LRR-XI-1    | PK |
| F01_cb4975_c1/f2p1/3221-1F  | RLK-Pelle_LRR-XI-1    | PK |
| F01_cb4975_c2/f1p0/3183-0F  | RLK-Pelle_LRR-XI-1    | PK |
| F01_cb4975_c5/f1p0/3193-2F  | RLK-Pelle_LRR-XI-1    | PK |
| F01_cb497_c0/f1p0/4788-0F   | RLK-Pelle_PERK-1      | PK |
| F01_cb497_c1/f1p0/2979-1F   | RLK-Pelle_PERK-1      | PK |
| F01_cb499_c10/f2p0/3400-0F  | RLK-Pelle_DLSV        | PK |
| F01_cb499_c13/f1p0/4098-0F  | RLK-Pelle_DLSV        | PK |
| F01_cb499_c13/f1p0/4098-1F  | RLK-Pelle_DLSV        | PK |
| F01_cb499_c13/f1p0/4098-2F  | RLK-Pelle_DLSV        | PK |
| F01_cb499_c14/f1p0/3097-0F  | RLK-Pelle_DLSV        | PK |

---

---

|                            |                  |    |
|----------------------------|------------------|----|
| F01_cb499_c15/flp0/4187-2F | RLK-Pelle_DLSV   | PK |
| F01_cb499_c16/flp0/3614-2F | RLK-Pelle_DLSV   | PK |
| F01_cb499_c17/flp1/3623-2F | RLK-Pelle_DLSV   | PK |
| F01_cb499_c19/flp1/3405-0F | RLK-Pelle_DLSV   | PK |
| F01_cb499_c19/flp1/3405-1F | RLK-Pelle_PERK-2 | PK |
| F01_cb499_c20/flp1/3689-0F | RLK-Pelle_DLSV   | PK |
| F01_cb499_c20/flp1/3689-1F | RLK-Pelle_DLSV   | PK |
| F01_cb499_c21/flp0/3092-2F | RLK-Pelle_DLSV   | PK |
| F01_cb499_c24/flp0/3755-0F | RLK-Pelle_DLSV   | PK |
| F01_cb499_c25/flp0/3238-2F | RLK-Pelle_DLSV   | PK |
| F01_cb499_c26/flp0/3193-1F | RLK-Pelle_DLSV   | PK |
| F01_cb499_c28/flp0/3948-1F | RLK-Pelle_DLSV   | PK |
| F01_cb499_c29/flp0/3667-0F | RLK-Pelle_DLSV   | PK |
| F01_cb499_c30/flp1/2918-1F | RLK-Pelle_DLSV   | PK |
| F01_cb499_c33/flp0/3719-1F | RLK-Pelle_DLSV   | PK |
| F01_cb499_c34/flp0/3463-0F | RLK-Pelle_DLSV   | PK |
| F01_cb499_c37/flp0/4542-1F | RLK-Pelle_DLSV   | PK |
| F01_cb499_c38/flp0/3714-2F | RLK-Pelle_DLSV   | PK |
| F01_cb499_c40/flp0/3109-0F | RLK-Pelle_DLSV   | PK |
| F01_cb499_c40/flp0/3109-1F | RLK-Pelle_DLSV   | PK |
| F01_cb499_c41/flp0/3022-2F | RLK-Pelle_DLSV   | PK |
| F01_cb499_c42/flp0/1931-1F | RLK-Pelle_DLSV   | PK |
| F01_cb499_c42/flp0/1931-2F | RLK-Pelle_DLSV   | PK |
| F01_cb499_c44/flp0/2881-1F | RLK-Pelle_DLSV   | PK |
| F01_cb499_c46/flp0/3594-0F | RLK-Pelle_DLSV   | PK |
| F01_cb499_c48/flp0/4241-1F | RLK-Pelle_DLSV   | PK |

---

---

|                              |                    |    |
|------------------------------|--------------------|----|
| F01_cb499_c50/f1p0/2769-0F   | RLK-Pelle_DLSV     | PK |
| F01_cb499_c50/f1p0/2769-2F   | RLK-Pelle_DLSV     | PK |
| F01_cb5013_c1/f4p0/2651-1F   | STE_STE20-YSK      | PK |
| F01_cb5013_c10/f1p0/2544-0F  | STE_STE20-YSK      | PK |
| F01_cb5013_c13/f1p0/2846-0F  | STE_STE20-YSK      | PK |
| F01_cb5013_c13/f1p0/2846-2F  | STE_STE20-YSK      | PK |
| F01_cb5013_c14/f1p0/2747-1F  | STE_STE20-YSK      | PK |
| F01_cb5013_c15/f1p0/2652-1F  | STE_STE20-YSK      | PK |
| F01_cb5013_c16/f1p0/2722-2F  | STE_STE20-YSK      | PK |
| F01_cb5013_c21/f1p0/2775-0F  | STE_STE20-YSK      | PK |
| F01_cb5013_c22/f1p0/2641-0F  | STE_STE20-YSK      | PK |
| F01_cb5013_c22/f1p0/2641-1F  | STE_STE20-YSK      | PK |
| F01_cb5013_c25/f5p0/2757-2F  | STE_STE20-YSK      | PK |
| F01_cb5013_c6/f1p0/3199-0F   | STE_STE20-YSK      | PK |
| F01_cb5013_c8/f1p0/2599-2F   | STE_STE20-YSK      | PK |
| F01_cb5013_c9/f1p0/2494-0F   | STE_STE20-YSK      | PK |
| F01_cb5109_c0/f2p0/2754-1F   | RLK-Pelle_CR4L     | PK |
| F01_cb5109_c1/f1p0/3177-0F   | RLK-Pelle_CR4L     | PK |
| F01_cb5109_c1/f1p0/3177-2F   | RLK-Pelle_CR4L     | PK |
| F01_cb5109_c4/f1p0/2758-1F   | RLK-Pelle_CR4L     | PK |
| F01_cb5109_c4/f1p0/2758-2F   | RLK-Pelle_CR4L     | PK |
| F01_cb5111_c10/f1p0/2552-1F  | CMGC_CDK-CRK7-CDK9 | PK |
| F01_cb5111_c12/f1p0/2418-1F  | CMGC_CDK-CRK7-CDK9 | PK |
| F01_cb5111_c13/f10p0/2484-1F | CMGC_CDK-CRK7-CDK9 | PK |
| F01_cb5111_c2/f2p0/2492-2F   | CMGC_CDK-CRK7-CDK9 | PK |
| F01_cb5111_c4/f1p0/3176-0F   | CMGC_CDK-CRK7-CDK9 | PK |

---

---

|                             |                     |    |
|-----------------------------|---------------------|----|
| F01_cb5111_c4/flp0/3176-1F  | CMGC_CDK-CRK7-CDK9  | PK |
| F01_cb5111_c6/flp0/3148-1F  | CMGC_CDK-CRK7-CDK9  | PK |
| F01_cb5111_c8/flp0/2226-1F  | CMGC_CDK-CRK7-CDK9  | PK |
| F01_cb5112_c0/f4p1/2507-1F  | RLK-Pelle_LRR-IV    | PK |
| F01_cb5112_c2/flp1/2437-0F  | RLK-Pelle_LRR-IV    | PK |
| F01_cb5112_c3/flp1/2498-2F  | RLK-Pelle_LRR-IV    | PK |
| F01_cb5142_c0/flp0/3181-2F  | RLK-Pelle_LRR-XI-1  | PK |
| F01_cb5142_c1/flp0/3108-2F  | RLK-Pelle_LRR-XI-1  | PK |
| F01_cb5144_c3/flp0/2512-0F  | CAMK_CDPK           | PK |
| F01_cb5191_c0/f2p1/2708-1F  | RLK-Pelle_LRR-IV    | PK |
| F01_cb5191_c1/flp0/3157-1F  | RLK-Pelle_LRR-IV    | PK |
| F01_cb5191_c1/flp0/3157-2F  | RLK-Pelle_LRR-IV    | PK |
| F01_cb5191_c2/flp0/2543-2F  | RLK-Pelle_LRR-IV    | PK |
| F01_cb5191_c3/flp1/2520-2F  | RLK-Pelle_LRR-IV    | PK |
| F01_cb5191_c4/flp1/2579-2F  | RLK-Pelle_LRR-IV    | PK |
| F01_cb5215_c3/flp0/2863-2F  | RLK-Pelle_LRR-VI-1  | PK |
| F01_cb5233_c0/flp0/3145-0F  | RLK-Pelle_LRR-VII-2 | PK |
| F01_cb5233_c0/flp0/3145-1F  | RLK-Pelle_LRR-VII-2 | PK |
| F01_cb5233_c0/flp0/3145-2F  | RLK-Pelle_LRR-VII-2 | PK |
| F01_cb5233_c1/flp0/3273-0F  | RLK-Pelle_LRR-VII-2 | PK |
| F01_cb5271_c13/flp0/2572-1F | WNK_NRBP            | PK |
| F01_cb5271_c13/flp0/2572-2F | WNK_NRBP            | PK |
| F01_cb5271_c15/flp0/2907-1F | WNK_NRBP            | PK |
| F01_cb5271_c17/flp2/2902-0F | WNK_NRBP            | PK |
| F01_cb5271_c17/flp2/2902-2F | WNK_NRBP            | PK |
| F01_cb5271_c18/flp2/2761-1F | WNK_NRBP            | PK |

---

---

|                             |                     |    |
|-----------------------------|---------------------|----|
| F01_cb5271_c21/f1p0/2659-1F | WNK_NRBP            | PK |
| F01_cb5271_c4/f1p2/3138-2F  | WNK_NRBP            | PK |
| F01_cb5271_c5/f1p2/2317-2F  | WNK_NRBP            | PK |
| F01_cb5271_c8/f1p2/2641-0F  | WNK_NRBP            | PK |
| F01_cb5271_c8/f1p2/2641-1F  | WNK_NRBP            | PK |
| F01_cb5271_c9/f1p0/2773-0F  | WNK_NRBP            | PK |
| F01_cb5286_c1/f1p0/3138-1F  | RLK-Pelle_LRR-V     | PK |
| F01_cb5286_c3/f1p0/2982-0F  | RLK-Pelle_LRR-V     | PK |
| F01_cb5286_c3/f1p0/2982-1F  | RLK-Pelle_LRR-V     | PK |
| F01_cb5286_c6/f1p0/2911-2F  | RLK-Pelle_LRR-V     | PK |
| F01_cb5286_c7/f1p0/2974-1F  | RLK-Pelle_LRR-V     | PK |
| F01_cb5286_c8/f1p0/2815-2F  | RLK-Pelle_LRR-V     | PK |
| F01_cb5290_c58/f1p0/2344-0F | AGC_NDR             | PK |
| F01_cb5290_c61/f1p0/2229-0F | AGC_NDR             | PK |
| F01_cb5290_c73/f5p0/2307-1F | AGC_NDR             | PK |
| F01_cb5320_c0/f3p0/3002-1F  | RLK-Pelle_CrRLK1L-1 | PK |
| F01_cb5320_c3/f1p0/3096-1F  | RLK-Pelle_CrRLK1L-1 | PK |
| F01_cb5320_c5/f1p0/2967-0F  | RLK-Pelle_CrRLK1L-1 | PK |
| F01_cb5321_c3/f1p0/2327-2F  | TKL-PI-1            | PK |
| F01_cb5321_c4/f1p0/2599-2F  | TKL-PI-1            | PK |
| F01_cb5321_c6/f1p0/2549-1F  | TKL-PI-1            | PK |
| F01_cb5342_c2/f1p1/2625-1F  | RLK-Pelle_LRR-III   | PK |
| F01_cb5357_c1/f3p0/2536-2F  | CMGC_CDK-CRK7-CDK9  | PK |
| F01_cb5357_c11/f1p0/2716-1F | CMGC_CDK-CRK7-CDK9  | PK |
| F01_cb5357_c12/f1p0/2313-2F | CMGC_CDK-CRK7-CDK9  | PK |
| F01_cb5357_c2/f1p0/3122-0F  | CMGC_CDK-CRK7-CDK9  | PK |

---

---

|                             |                       |    |
|-----------------------------|-----------------------|----|
| F01_cb5357_c3/flp1/3064-1F  | CMGC_CDK-CRK7-CDK9    | PK |
| F01_cb5357_c6/flp1/3394-1F  | CMGC_CDK-CRK7-CDK9    | PK |
| F01_cb5357_c8/flp0/2504-2F  | CMGC_CDK-CRK7-CDK9    | PK |
| F01_cb5357_c9/flp0/2509-1F  | CMGC_CDK-CRK7-CDK9    | PK |
| F01_cb5357_c9/flp0/2509-2F  | CMGC_CDK-CRK7-CDK9    | PK |
| F01_cb5367_c1/flp0/3116-1F  | RLK-Pelle_RLCK-VIIa-2 | PK |
| F01_cb5367_c2/flp0/1997-0F  | RLK-Pelle_RLCK-VIIa-2 | PK |
| F01_cb5367_c2/flp0/1997-2F  | RLK-Pelle_RLCK-VIIa-2 | PK |
| F01_cb5367_c3/flp0/2118-1F  | RLK-Pelle_RLCK-VIIa-2 | PK |
| F01_cb5367_c4/flp0/1945-0F  | RLK-Pelle_RLCK-VIIa-2 | PK |
| F01_cb5367_c4/flp0/1945-0R  | RLK-Pelle_RLCK-VIIa-2 | PK |
| F01_cb5367_c4/flp0/1945-1R  | RLK-Pelle_RLCK-VIIa-2 | PK |
| F01_cb5367_c5/flp0/1827-0F  | RLK-Pelle_RLCK-VIIa-2 | PK |
| F01_cb5369_c1/flp0/1896-2F  | RLK-Pelle_SD-2b       | PK |
| F01_cb5369_c12/flp0/1798-0F | RLK-Pelle_SD-2b       | PK |
| F01_cb5369_c13/flp0/1756-2F | RLK-Pelle_SD-2b       | PK |
| F01_cb5369_c14/flp0/1960-1F | RLK-Pelle_SD-2b       | PK |
| F01_cb5369_c3/f3p0/2592-2F  | RLK-Pelle_SD-2b       | PK |
| F01_cb5369_c7/flp0/2712-1F  | RLK-Pelle_SD-2b       | PK |
| F01_cb5369_c8/flp0/2051-2F  | RLK-Pelle_SD-2b       | PK |
| F01_cb5436_c2/flp0/2851-2F  | RLK-Pelle_LRR-III     | PK |
| F01_cb5436_c6/flp1/1613-2F  | RLK-Pelle_LRR-III     | PK |
| F01_cb5436_c7/flp1/2914-1F  | RLK-Pelle_LRR-III     | PK |
| F01_cb5441_c2/flp0/3099-0F  | RLK-Pelle_URK-1       | PK |
| F01_cb5441_c2/flp0/3099-2F  | RLK-Pelle_URK-1       | PK |
| F01_cb5441_c4/flp0/2567-1F  | RLK-Pelle_URK-1       | PK |

---



---

|                             |                    |    |
|-----------------------------|--------------------|----|
| F01_cb5441_c5/flp0/2520-0F  | RLK-Pelle_URK-1    | PK |
| F01_cb5441_c6/flp0/2471-1F  | RLK-Pelle_URK-1    | PK |
| F01_cb5441_c8/f4p0/2512-2F  | RLK-Pelle_URK-1    | PK |
| F01_cb5447_c3/f5p2/3155-0F  | RLK-Pelle_Extensin | PK |
| F01_cb5447_c33/flp0/4199-1F | RLK-Pelle_Extensin | PK |
| F01_cb5447_c33/flp0/4199-2F | RLK-Pelle_Extensin | PK |
| F01_cb5447_c34/flp0/3194-1F | RLK-Pelle_Extensin | PK |
| F01_cb5447_c38/flp1/3528-1F | RLK-Pelle_Extensin | PK |
| F01_cb5447_c39/flp0/4097-1F | RLK-Pelle_Extensin | PK |
| F01_cb5447_c39/flp0/4097-2F | RLK-Pelle_Extensin | PK |
| F01_cb5447_c40/flp0/3143-1F | RLK-Pelle_Extensin | PK |
| F01_cb5447_c41/flp0/3095-0F | RLK-Pelle_Extensin | PK |
| F01_cb5447_c41/flp0/3095-2F | RLK-Pelle_Extensin | PK |
| F01_cb5459_c3/flp0/2194-1F  | TKL-PI-4           | PK |
| F01_cb5459_c3/flp0/2194-2F  | TKL-PI-4           | PK |
| F01_cb5459_c4/flp0/2364-2F  | TKL-PI-4           | PK |
| F01_cb5459_c5/flp0/1863-1F  | TKL-PI-4           | PK |
| F01_cb5483_c0/f2p0/2674-0F  | STE_STE20-PI       | PK |
| F01_cb5483_c2/flp0/2756-0F  | STE_STE20-PI       | PK |
| F01_cb5483_c2/flp0/2756-2F  | STE_STE20-PI       | PK |
| F01_cb5483_c3/flp0/2270-1F  | STE_STE20-PI       | PK |
| F01_cb5483_c4/flp0/2765-2F  | STE_STE20-PI       | PK |
| F01_cb5483_c6/flp0/2710-1F  | STE_STE20-PI       | PK |
| F01_cb5483_c7/flp0/2690-1F  | STE_STE20-PI       | PK |
| F01_cb5491_c13/flp0/3025-1F | TKL_CTR1-DRK-2     | PK |
| F01_cb5491_c4/flp1/2927-0F  | TKL_CTR1-DRK-2     | PK |

---

---

|                             |                   |    |
|-----------------------------|-------------------|----|
| F01_cb5491_c5/flp0/3302-1F  | TKL_CTR1-DRK-2    | PK |
| F01_cb5491_c6/flp0/3581-0F  | TKL_CTR1-DRK-2    | PK |
| F01_cb5491_c6/flp0/3581-1F  | TKL_CTR1-DRK-2    | PK |
| F01_cb5491_c7/flp0/2954-2F  | TKL_CTR1-DRK-2    | PK |
| F01_cb5491_c9/flp0/3235-0F  | TKL_CTR1-DRK-2    | PK |
| F01_cb5504_c13/flp0/2497-0F | RLK-Pelle_RLCK-IV | PK |
| F01_cb5504_c13/flp0/2497-1F | RLK-Pelle_RLCK-IV | PK |
| F01_cb5504_c14/flp0/2964-2F | RLK-Pelle_RLCK-IV | PK |
| F01_cb5504_c15/flp0/2760-2F | RLK-Pelle_RLCK-IV | PK |
| F01_cb5504_c16/flp0/2220-0F | RLK-Pelle_RLCK-IV | PK |
| F01_cb5504_c17/flp0/2609-0F | RLK-Pelle_RLCK-IV | PK |
| F01_cb5504_c17/flp0/2609-1F | RLK-Pelle_RLCK-IV | PK |
| F01_cb5504_c17/flp0/2609-2F | RLK-Pelle_RLCK-IV | PK |
| F01_cb5504_c18/flp0/2890-0F | RLK-Pelle_RLCK-IV | PK |
| F01_cb5504_c18/flp0/2890-1F | RLK-Pelle_RLCK-IV | PK |
| F01_cb5504_c18/flp0/2890-2F | RLK-Pelle_RLCK-IV | PK |
| F01_cb5504_c20/flp0/2911-0F | RLK-Pelle_RLCK-IV | PK |
| F01_cb5504_c27/flp0/2492-2F | RLK-Pelle_RLCK-IV | PK |
| F01_cb5504_c37/flp0/2776-2F | RLK-Pelle_RLCK-IV | PK |
| F01_cb5504_c38/flp0/2797-2F | RLK-Pelle_RLCK-IV | PK |
| F01_cb5504_c6/f6p0/2380-0F  | RLK-Pelle_RLCK-IV | PK |
| F01_cb5511_c0/flp0/3045-0F  | TKL-PI-5          | PK |
| F01_cb5511_c0/flp0/3045-1F  | TKL-PI-5          | PK |
| F01_cb5511_c1/flp0/1933-0F  | TKL-PI-5          | PK |
| F01_cb5511_c2/flp0/1970-0F  | TKL-PI-5          | PK |
| F01_cb5511_c2/flp0/1970-1F  | TKL-PI-5          | PK |

---

---

|                               |                       |    |
|-------------------------------|-----------------------|----|
| F01_cb5522_c7/flp0/1984-1F    | RLK-Pelle_RLCK-VIIa-2 | PK |
| F01_cb5522_c7/flp0/1984-2F    | RLK-Pelle_RLCK-VIIa-2 | PK |
| F01_cb5531_c0/flp0/3078-1F    | RLK-Pelle_RLCK-IXb    | PK |
| F01_cb5533_c100/flp0/3079-2F  | IRE1                  | PK |
| F01_cb5533_c102/flp0/3223-1F  | IRE1                  | PK |
| F01_cb5533_c14/f3p0/3182-0F   | IRE1                  | PK |
| F01_cb5533_c157/f30p1/3193-0F | IRE1                  | PK |
| F01_cb5533_c23/f2p0/2999-2F   | IRE1                  | PK |
| F01_cb5533_c87/flp0/4042-1F   | IRE1                  | PK |
| F01_cb5533_c91/flp0/2376-1F   | IRE1                  | PK |
| F01_cb5533_c94/flp0/3604-1F   | IRE1                  | PK |
| F01_cb5533_c97/flp0/3240-0F   | IRE1                  | PK |
| F01_cb5544_c0/flp0/3075-0F    | WNK_NRBP              | PK |
| F01_cb5544_c1/flp0/2871-1F    | WNK_NRBP              | PK |
| F01_cb5544_c7/flp0/2702-1F    | WNK_NRBP              | PK |
| F01_cb5550_c10/flp0/4832-0F   | RLK-Pelle_SD-2b       | PK |
| F01_cb5550_c11/flp0/2859-0F   | RLK-Pelle_SD-2b       | PK |
| F01_cb5550_c11/flp0/2859-1F   | RLK-Pelle_SD-2b       | PK |
| F01_cb5550_c15/flp0/3028-0F   | RLK-Pelle_SD-2b       | PK |
| F01_cb5550_c17/flp0/3017-2F   | RLK-Pelle_SD-2b       | PK |
| F01_cb5550_c19/flp0/3088-2F   | RLK-Pelle_SD-2b       | PK |
| F01_cb5550_c2/f6p2/2945-2F    | RLK-Pelle_SD-2b       | PK |
| F01_cb5550_c20/flp0/3027-0F   | RLK-Pelle_SD-2b       | PK |
| F01_cb5550_c21/flp0/2777-2F   | RLK-Pelle_SD-2b       | PK |
| F01_cb5550_c24/flp0/3585-2F   | RLK-Pelle_SD-2b       | PK |
| F01_cb5550_c25/flp0/3243-1F   | RLK-Pelle_SD-2b       | PK |

---

---

|                              |                  |    |
|------------------------------|------------------|----|
| F01_cb5550_c26/flp0/3074-0F  | RLK-Pelle_SD-2b  | PK |
| F01_cb5550_c33/flp0/2639-1F  | RLK-Pelle_SD-2b  | PK |
| F01_cb5550_c36/flp0/2814-1F  | RLK-Pelle_SD-2b  | PK |
| F01_cb5550_c36/flp0/2814-2F  | RLK-Pelle_SD-2b  | PK |
| F01_cb5550_c37/flp1/2659-0F  | RLK-Pelle_SD-2b  | PK |
| F01_cb5550_c41/flp0/2806-2F  | RLK-Pelle_SD-2b  | PK |
| F01_cb5550_c7/f2p1/2855-2F   | RLK-Pelle_SD-2b  | PK |
| F01_cb5550_c8/flp0/3082-2F   | RLK-Pelle_SD-2b  | PK |
| F01_cb5564_c13/flp0/1988-1F  | CAMK_CDPK        | PK |
| F01_cb5564_c14/fl4p1/2858-1F | CAMK_CDPK        | PK |
| F01_cb5564_c17/flp0/2403-2F  | CAMK_CDPK        | PK |
| F01_cb5564_c18/flp1/2823-2F  | CAMK_CDPK        | PK |
| F01_cb5564_c2/f3p1/2892-2F   | CAMK_CDPK        | PK |
| F01_cb5564_c21/flp0/1889-2F  | CAMK_CDPK        | PK |
| F01_cb5564_c6/f3p0/2246-1F   | CAMK_CDPK        | PK |
| F01_cb5564_c9/flp0/2154-0F   | CAMK_CDPK        | PK |
| F01_cb5578_c0/flp0/3067-2F   | RLK-Pelle_SD-2b  | PK |
| F01_cb5578_c2/flp0/2748-2F   | RLK-Pelle_SD-2b  | PK |
| F01_cb5578_c3/flp0/2902-0F   | RLK-Pelle_SD-2b  | PK |
| F01_cb5578_c3/flp0/2902-2F   | RLK-Pelle_SD-2b  | PK |
| F01_cb5596_c0/f36p1/2642-0F  | RLK-Pelle_PERK-2 | PK |
| F01_cb5596_c10/flp2/2553-1F  | RLK-Pelle_PERK-2 | PK |
| F01_cb5596_c12/f2p1/2644-2F  | RLK-Pelle_PERK-2 | PK |
| F01_cb5596_c14/flp0/2891-0F  | RLK-Pelle_PERK-2 | PK |
| F01_cb5596_c16/flp0/3416-2F  | RLK-Pelle_PERK-2 | PK |
| F01_cb5596_c18/flp0/2340-1F  | RLK-Pelle_PERK-2 | PK |

---

---

|                             |                  |    |
|-----------------------------|------------------|----|
| F01_cb5596_c18/flp0/2340-2F | RLK-Pelle_PERK-2 | PK |
| F01_cb5596_c21/flp0/2666-0F | RLK-Pelle_PERK-2 | PK |
| F01_cb5596_c22/flp0/3148-0F | RLK-Pelle_PERK-2 | PK |
| F01_cb5596_c23/flp0/2671-0F | RLK-Pelle_PERK-2 | PK |
| F01_cb5596_c24/flp0/2921-0F | RLK-Pelle_PERK-2 | PK |
| F01_cb5596_c24/flp0/2921-2F | RLK-Pelle_PERK-2 | PK |
| F01_cb5596_c26/flp1/2546-1F | RLK-Pelle_PERK-2 | PK |
| F01_cb5596_c27/flp0/2677-1F | RLK-Pelle_PERK-2 | PK |
| F01_cb5596_c28/flp0/2520-2F | RLK-Pelle_PERK-2 | PK |
| F01_cb5596_c33/flp0/2807-2F | RLK-Pelle_PERK-2 | PK |
| F01_cb5596_c37/flp0/2917-2F | RLK-Pelle_PERK-2 | PK |
| F01_cb5596_c38/flp0/2685-1F | RLK-Pelle_PERK-2 | PK |
| F01_cb5596_c39/flp0/2882-1F | RLK-Pelle_PERK-2 | PK |
| F01_cb5596_c44/flp0/2655-1F | RLK-Pelle_PERK-2 | PK |
| F01_cb5596_c6/flp0/2530-1F  | RLK-Pelle_PERK-2 | PK |
| F01_cb5612_c10/flp0/2551-2F | NEK              | PK |
| F01_cb5612_c13/f3p0/2458-0F | NEK              | PK |
| F01_cb5612_c14/f3p0/2416-1F | NEK              | PK |
| F01_cb5612_c2/f2p0/2528-2F  | NEK              | PK |
| F01_cb5612_c3/flp0/3057-1F  | NEK              | PK |
| F01_cb5612_c4/flp0/2446-2F  | NEK              | PK |
| F01_cb5612_c7/flp0/2803-1F  | NEK              | PK |
| F01_cb5612_c8/flp0/2542-0F  | NEK              | PK |
| F01_cb5632_c10/flp0/2740-0F | RLK-Pelle_L-LEC  | PK |
| F01_cb5632_c10/flp0/2740-1F | RLK-Pelle_L-LEC  | PK |
| F01_cb5632_c13/flp0/2425-2F | RLK-Pelle_L-LEC  | PK |

---

---

|                              |                  |    |
|------------------------------|------------------|----|
| F01_cb5632_c14/flp1/2688-0F  | RLK-Pelle_L-LEC  | PK |
| F01_cb5632_c16/flp1/2698-2F  | RLK-Pelle_L-LEC  | PK |
| F01_cb5632_c17/flp0/1897-0F  | RLK-Pelle_L-LEC  | PK |
| F01_cb5632_c18/flp1/3084-1F  | RLK-Pelle_L-LEC  | PK |
| F01_cb5632_c20/flp1/2425-1F  | RLK-Pelle_L-LEC  | PK |
| F01_cb5632_c26/flp1/2618-1F  | RLK-Pelle_L-LEC  | PK |
| F01_cb5632_c31/flp1/2684-1F  | RLK-Pelle_L-LEC  | PK |
| F01_cb5632_c34/flp0/2494-1F  | RLK-Pelle_L-LEC  | PK |
| F01_cb5632_c38/flp0/2556-1F  | RLK-Pelle_L-LEC  | PK |
| F01_cb5632_c41/flp0/1646-1F  | RLK-Pelle_L-LEC  | PK |
| F01_cb5632_c42/f2p0/2465-1F  | RLK-Pelle_L-LEC  | PK |
| F01_cb5632_c45/f2p1/3154-0F  | RLK-Pelle_L-LEC  | PK |
| F01_cb5632_c5/f2p0/2554-1F   | RLK-Pelle_L-LEC  | PK |
| F01_cb5632_c9/flp0/3493-0F   | RLK-Pelle_L-LEC  | PK |
| F01_cb5632_c9/flp0/3493-2F   | RLK-Pelle_L-LEC  | PK |
| F01_cb5633_c76/flp0/2047-2F  | CAMK_CAMKL-CHK1  | PK |
| F01_cb5643_c111/flp1/2459-0F | RLK-Pelle_LRR-II | PK |
| F01_cb5643_c111/flp1/2459-2F | RLK-Pelle_LRR-II | PK |
| F01_cb5643_c113/flp0/2786-0F | RLK-Pelle_LRR-II | PK |
| F01_cb5643_c120/f3p1/2448-2F | RLK-Pelle_LRR-II | PK |
| F01_cb5643_c124/f5p1/2491-1F | RLK-Pelle_LRR-II | PK |
| F01_cb5643_c45/flp0/3996-0F  | RLK-Pelle_LRR-II | PK |
| F01_cb5643_c45/flp0/3996-2F  | RLK-Pelle_LRR-II | PK |
| F01_cb5643_c46/flp0/3297-2F  | RLK-Pelle_LRR-II | PK |
| F01_cb5643_c47/flp0/2358-0F  | RLK-Pelle_LRR-II | PK |
| F01_cb5643_c47/flp0/2358-1F  | RLK-Pelle_LRR-II | PK |

---

---

|                             |                  |    |
|-----------------------------|------------------|----|
| F01_cb5643_c49/flp0/2351-0F | RLK-Pelle_LRR-II | PK |
| F01_cb5643_c52/flp1/2668-0F | RLK-Pelle_LRR-II | PK |
| F01_cb5643_c54/flp0/2813-1F | RLK-Pelle_LRR-II | PK |
| F01_cb5643_c54/flp0/2813-2F | RLK-Pelle_LRR-II | PK |
| F01_cb5643_c56/flp0/2251-2F | RLK-Pelle_LRR-II | PK |
| F01_cb5643_c60/flp1/2497-1F | RLK-Pelle_LRR-II | PK |
| F01_cb5643_c62/flp1/3868-2F | RLK-Pelle_LRR-II | PK |
| F01_cb5643_c64/flp0/2089-0F | RLK-Pelle_LRR-II | PK |
| F01_cb5643_c66/flp0/2234-0F | RLK-Pelle_LRR-II | PK |
| F01_cb5643_c68/flp0/3247-2F | RLK-Pelle_LRR-II | PK |
| F01_cb5643_c69/flp0/2630-2F | RLK-Pelle_LRR-II | PK |
| F01_cb5643_c70/flp1/2237-0F | RLK-Pelle_LRR-II | PK |
| F01_cb5643_c71/flp0/2363-2F | RLK-Pelle_LRR-II | PK |
| F01_cb5643_c72/flp1/2912-1F | RLK-Pelle_LRR-II | PK |
| F01_cb5643_c74/flp0/2864-1F | RLK-Pelle_LRR-II | PK |
| F01_cb5643_c75/flp0/2482-1F | RLK-Pelle_LRR-II | PK |
| F01_cb5643_c76/flp0/2697-2F | RLK-Pelle_LRR-II | PK |
| F01_cb5672_c13/flp0/3266-1F | WNK_NRBP         | PK |
| F01_cb5672_c15/flp0/3570-1F | WNK_NRBP         | PK |
| F01_cb5672_c16/flp0/2940-0F | WNK_NRBP         | PK |
| F01_cb5672_c17/flp0/2844-2F | WNK_NRBP         | PK |
| F01_cb5672_c6/flp0/3840-1F  | WNK_NRBP         | PK |
| F01_cb5672_c6/flp0/3840-2F  | WNK_NRBP         | PK |
| F01_cb5672_c7/flp0/3125-1F  | WNK_NRBP         | PK |
| F01_cb5672_c9/flp0/2989-2F  | WNK_NRBP         | PK |
| F01_cb5687_c10/flp0/2094-0F | WNK_NRBP         | PK |

---

---

|                             |           |    |
|-----------------------------|-----------|----|
| F01_cb5687_c11/flp0/2528-1F | WNK_NRBP  | PK |
| F01_cb5687_c13/flp0/2518-2F | WNK_NRBP  | PK |
| F01_cb5687_c16/flp0/2296-0F | WNK_NRBP  | PK |
| F01_cb5687_c6/flp1/2721-1F  | WNK_NRBP  | PK |
| F01_cb5748_c0/f8p0/1723-1F  | CMGC_CK2  | PK |
| F01_cb5748_c2/flp0/3016-2F  | CMGC_CK2  | PK |
| F01_cb5748_c4/flp0/2096-0F  | CMGC_CK2  | PK |
| F01_cb5748_c4/flp0/2096-1F  | CMGC_CK2  | PK |
| F01_cb5748_c6/flp0/1754-1F  | CMGC_CK2  | PK |
| F01_cb5748_c7/flp0/1637-1F  | CMGC_CK2  | PK |
| F01_cb5753_c0/f7p1/2864-0F  | CMGC_MAPK | PK |
| F01_cb5753_c0/f7p1/2864-1F  | CMGC_MAPK | PK |
| F01_cb5753_c11/f2p0/2606-1F | CMGC_MAPK | PK |
| F01_cb5753_c12/flp0/3021-2F | CMGC_MAPK | PK |
| F01_cb5753_c13/flp0/3054-0F | CMGC_MAPK | PK |
| F01_cb5753_c14/flp1/2728-0F | CMGC_MAPK | PK |
| F01_cb5753_c15/flp0/2255-0F | CMGC_MAPK | PK |
| F01_cb5753_c15/flp0/2255-1F | CMGC_MAPK | PK |
| F01_cb5753_c15/flp0/2255-2F | CMGC_MAPK | PK |
| F01_cb5753_c16/flp1/2807-1F | CMGC_MAPK | PK |
| F01_cb5753_c18/flp0/2096-0F | CMGC_MAPK | PK |
| F01_cb5753_c19/flp0/2260-2F | CMGC_MAPK | PK |
| F01_cb5753_c20/flp0/2971-1F | CMGC_MAPK | PK |
| F01_cb5753_c21/flp0/2865-0F | CMGC_MAPK | PK |
| F01_cb5753_c21/flp0/2865-2F | CMGC_MAPK | PK |
| F01_cb5753_c23/flp0/2880-0F | CMGC_MAPK | PK |

---



---

|                             |                    |    |
|-----------------------------|--------------------|----|
| F01_cb5753_c28/flp0/1949-1F | CMGC_MAPK          | PK |
| F01_cb5753_c29/flp0/2753-0F | CMGC_MAPK          | PK |
| F01_cb5753_c29/flp0/2753-1F | CMGC_MAPK          | PK |
| F01_cb5753_c30/flp0/2911-1F | CMGC_MAPK          | PK |
| F01_cb5753_c31/flp0/2748-0F | CMGC_MAPK          | PK |
| F01_cb5753_c31/flp0/2748-2F | CMGC_MAPK          | PK |
| F01_cb5753_c33/flp0/2714-0F | CMGC_MAPK          | PK |
| F01_cb5753_c33/flp0/2714-2F | CMGC_MAPK          | PK |
| F01_cb5753_c34/flp0/2333-1F | CMGC_MAPK          | PK |
| F01_cb5753_c36/flp0/2398-0F | CMGC_MAPK          | PK |
| F01_cb5753_c39/flp0/2241-1F | CMGC_MAPK          | PK |
| F01_cb5753_c41/flp0/5369-0F | CMGC_MAPK          | PK |
| F01_cb5753_c41/flp0/5369-1F | CMGC_MAPK          | PK |
| F01_cb5753_c5/f3p2/2848-0F  | CMGC_MAPK          | PK |
| F01_cb5753_c6/f3p0/2151-2F  | CMGC_MAPK          | PK |
| F01_cb5753_c8/f2p1/2741-1F  | CMGC_MAPK          | PK |
| F01_cb5753_c8/f2p1/2741-2F  | CMGC_MAPK          | PK |
| F01_cb5776_c11/flp0/2892-1F | RLK-Pelle_DLSV     | PK |
| F01_cb5776_c12/flp0/2807-1F | RLK-Pelle_DLSV     | PK |
| F01_cb5776_c14/flp0/1675-0F | RLK-Pelle_DLSV     | PK |
| F01_cb5776_c16/flp0/1547-1F | RLK-Pelle_DLSV     | PK |
| F01_cb5776_c4/f2p0/3004-1F  | RLK-Pelle_DLSV     | PK |
| F01_cb5776_c6/flp0/3012-0F  | RLK-Pelle_DLSV     | PK |
| F01_cb5800_c0/f3p1/2948-0F  | RLK-Pelle_LRR-XI-1 | PK |
| F01_cb5800_c4/flp1/2928-0F  | RLK-Pelle_LRR-XI-1 | PK |
| F01_cb5806_c1/f2p1/2477-2F  | CMGC_DYRK-PRP4     | PK |

---

---

|                             |                        |    |
|-----------------------------|------------------------|----|
| F01_cb5806_c10/flp0/2919-0F | CMGC_DYRK-PRP4         | PK |
| F01_cb5806_c2/flp0/2888-1F  | CMGC_DYRK-PRP4         | PK |
| F01_cb5806_c3/flp1/2760-2F  | CMGC_DYRK-PRP4         | PK |
| F01_cb5806_c4/flp2/2764-0F  | CMGC_DYRK-PRP4         | PK |
| F01_cb5806_c7/flp0/2887-2F  | CMGC_DYRK-PRP4         | PK |
| F01_cb5806_c8/flp1/2966-0F  | CMGC_DYRK-PRP4         | PK |
| F01_cb5806_c8/flp1/2966-2R  | CMGC_DYRK-PRP4         | PK |
| F01_cb5806_c9/flp0/2701-2F  | CMGC_DYRK-PRP4         | PK |
| F01_cb5846_c11/f2p0/2656-2F | RLK-Pelle_WAK          | PK |
| F01_cb5846_c13/flp0/2820-0F | RLK-Pelle_WAK          | PK |
| F01_cb5846_c15/flp1/2610-0F | RLK-Pelle_WAK          | PK |
| F01_cb5846_c26/flp0/3075-1F | RLK-Pelle_WAK          | PK |
| F01_cb5846_c27/flp0/2652-2F | RLK-Pelle_WAK          | PK |
| F01_cb5846_c28/flp1/2713-0F | RLK-Pelle_WAK          | PK |
| F01_cb5846_c28/flp1/2713-2F | RLK-Pelle_WAK          | PK |
| F01_cb5846_c29/flp0/2902-0F | RLK-Pelle_WAK          | PK |
| F01_cb5846_c29/flp0/2902-1F | RLK-Pelle_WAK_LRK10L-1 | PK |
| F01_cb5846_c3/f2p0/2710-0F  | RLK-Pelle_WAK          | PK |
| F01_cb5846_c3/f2p0/2710-1F  | RLK-Pelle_WAK          | PK |
| F01_cb5846_c33/flp0/2324-0F | RLK-Pelle_WAK          | PK |
| F01_cb5846_c34/flp0/3222-1F | RLK-Pelle_WAK          | PK |
| F01_cb5846_c35/flp0/3317-1F | RLK-Pelle_WAK          | PK |
| F01_cb5846_c37/flp0/2702-1F | RLK-Pelle_WAK          | PK |
| F01_cb5846_c38/flp0/2537-2F | RLK-Pelle_WAK          | PK |
| F01_cb5846_c4/f3p0/2791-1F  | RLK-Pelle_WAK          | PK |
| F01_cb5846_c40/flp0/2790-0F | RLK-Pelle_WAK          | PK |

---

---

|                              |                     |    |
|------------------------------|---------------------|----|
| F01_cb5846_c43/f1p0/2784-0F  | RLK-Pelle_WAK       | PK |
| F01_cb5846_c43/f1p0/2784-1F  | RLK-Pelle_WAK       | PK |
| F01_cb5846_c9/f2p0/2777-1F   | RLK-Pelle_WAK       | PK |
| F01_cb5869_c0/f1p0/2991-1F   | AGC_RSK-2           | PK |
| F01_cb5874_c11/f2p1/2975-0F  | WNK_NRBP            | PK |
| F01_cb5874_c13/f1p0/3016-0F  | WNK_NRBP            | PK |
| F01_cb5874_c15/f1p0/2254-2F  | WNK_NRBP            | PK |
| F01_cb5874_c16/f1p0/3263-1F  | WNK_NRBP            | PK |
| F01_cb5874_c22/f1p0/3282-0F  | WNK_NRBP            | PK |
| F01_cb5874_c27/f1p0/2672-2F  | WNK_NRBP            | PK |
| F01_cb5874_c30/f1p0/2210-0F  | WNK_NRBP            | PK |
| F01_cb5874_c33/f1p0/2945-1F  | WNK_NRBP            | PK |
| F01_cb5874_c6/f8p0/2864-2F   | WNK_NRBP            | PK |
| F01_cb5896_c10/f2p1/2427-0F  | RLK-Pelle_DLSV      | PK |
| F01_cb5896_c108/f1p0/2749-0F | RLK-Pelle_DLSV      | PK |
| F01_cb5896_c11/f2p1/2808-0F  | RLK-Pelle_DLSV      | PK |
| F01_cb5896_c144/f1p0/2661-2F | RLK-Pelle_LRR-XII-1 | PK |
| F01_cb5896_c146/f1p0/2739-1F | RLK-Pelle_DLSV      | PK |
| F01_cb5896_c148/f1p0/2924-1F | RLK-Pelle_DLSV      | PK |
| F01_cb5896_c2/f6p2/2670-0F   | RLK-Pelle_DLSV      | PK |
| F01_cb5896_c5/f4p2/2581-1F   | RLK-Pelle_DLSV      | PK |
| F01_cb5896_c60/f1p2/2803-1F  | RLK-Pelle_DLSV      | PK |
| F01_cb5896_c61/f1p1/2595-2F  | RLK-Pelle_DLSV      | PK |
| F01_cb5896_c64/f1p0/2959-1F  | RLK-Pelle_DLSV      | PK |
| F01_cb5896_c64/f1p0/2959-2F  | RLK-Pelle_DLSV      | PK |
| F01_cb5896_c65/f1p0/2600-0F  | RLK-Pelle_DLSV      | PK |

---

---

|                             |                       |    |
|-----------------------------|-----------------------|----|
| F01_cb5896_c67/flp0/3378-2F | RLK-Pelle_DLSV        | PK |
| F01_cb5896_c68/flp0/2575-2F | RLK-Pelle_DLSV        | PK |
| F01_cb5896_c97/flp1/2626-2F | RLK-Pelle_DLSV        | PK |
| F01_cb5910_c10/flp0/2649-0F | RLK-Pelle_LRR-V       | PK |
| F01_cb5910_c10/flp0/2649-2F | RLK-Pelle_LRR-V       | PK |
| F01_cb5910_c12/flp0/2660-1F | RLK-Pelle_LRR-V       | PK |
| F01_cb5910_c12/flp0/2660-2F | RLK-Pelle_LRR-V       | PK |
| F01_cb5910_c14/flp0/2772-2F | RLK-Pelle_LRR-V       | PK |
| F01_cb5910_c19/flp0/2736-0F | RLK-Pelle_LRR-V       | PK |
| F01_cb5910_c8/f2p0/2812-2F  | RLK-Pelle_LRR-V       | PK |
| F01_cb5910_c9/flp0/2993-2F  | RLK-Pelle_LRR-V       | PK |
| F01_cb5914_c0/flp0/2979-2F  | RLK-Pelle_RLCK-IXb    | PK |
| F01_cb5954_c0/flp0/2959-1F  | RLK-Pelle_SD-2b       | PK |
| F01_cb5954_c1/flp0/3443-0F  | RLK-Pelle_SD-2b       | PK |
| F01_cb5964_c1/flp0/2966-1F  | RLK-Pelle_Extensin    | PK |
| F01_cb5964_c2/flp0/2720-2F  | RLK-Pelle_Extensin    | PK |
| F01_cb5976_c0/flp0/2947-1F  | RLK-Pelle_RLCK-VIIa-2 | PK |
| F01_cb5976_c0/flp0/2947-2F  | RLK-Pelle_LysM        | PK |
| F01_cb5976_c1/flp0/3373-0F  | RLK-Pelle_LRR-XI-1    | PK |
| F01_cb5976_c1/flp0/3373-1F  | RLK-Pelle_RLCK-VIIa-2 | PK |
| F01_cb5976_c3/flp0/2633-1F  | RLK-Pelle_RLCK-VIIa-2 | PK |
| F01_cb5976_c3/flp0/2633-2F  | RLK-Pelle_LRR-XI-1    | PK |
| F01_cb5976_c4/flp0/2501-0F  | RLK-Pelle_WAK         | PK |
| F01_cb5976_c4/flp0/2501-2F  | RLK-Pelle_L-LEC       | PK |
| F01_cb5990_c0/f2p0/2303-2F  | RLK-Pelle_L-LEC       | PK |
| F01_cb5990_c1/flp0/2959-1F  | RLK-Pelle_L-LEC       | PK |

---

---

|                             |                     |    |
|-----------------------------|---------------------|----|
| F01_cb5990_c2/flp0/2341-0F  | RLK-Pelle_L-LEC     | PK |
| F01_cb5990_c3/flp0/2715-1F  | RLK-Pelle_L-LEC     | PK |
| F01_cb6005_c1/f2p1/2623-2F  | RLK-Pelle_LRR-III   | PK |
| F01_cb6005_c3/flp1/2710-0F  | RLK-Pelle_LRR-III   | PK |
| F01_cb6005_c4/flp0/2486-2F  | RLK-Pelle_LRR-III   | PK |
| F01_cb6032_c27/flp0/3675-0F | RLK-Pelle_LRR-XII-1 | PK |
| F01_cb6032_c28/flp0/3437-1F | RLK-Pelle_LRR-XII-1 | PK |
| F01_cb6032_c29/flp0/3404-1F | RLK-Pelle_LRR-XII-1 | PK |
| F01_cb6032_c29/flp0/3404-2F | RLK-Pelle_LRR-XII-1 | PK |
| F01_cb6032_c30/flp0/2901-0F | RLK-Pelle_LRR-XII-1 | PK |
| F01_cb6032_c33/flp0/3723-1F | RLK-Pelle_LRR-XII-1 | PK |
| F01_cb6032_c46/f4p0/3527-2F | RLK-Pelle_LRR-XII-1 | PK |
| F01_cb6032_c8/f3p0/3620-0F  | RLK-Pelle_LRR-XII-1 | PK |
| F01_cb6039_c19/f2p1/2346-1F | CAMK_CDPK           | PK |
| F01_cb6039_c22/flp0/2768-0F | CAMK_CDPK           | PK |
| F01_cb6039_c27/flp0/3037-1F | CAMK_CDPK           | PK |
| F01_cb6039_c28/flp0/1963-1F | CAMK_CDPK           | PK |
| F01_cb6039_c30/flp1/2549-1F | CAMK_CDPK           | PK |
| F01_cb6039_c31/flp0/2292-0F | CAMK_CDPK           | PK |
| F01_cb6039_c31/flp0/2292-1F | CAMK_CDPK           | PK |
| F01_cb6039_c33/flp0/2697-0F | CAMK_CDPK           | PK |
| F01_cb6039_c35/flp1/2387-2F | CAMK_CDPK           | PK |
| F01_cb6039_c38/flp0/2744-1F | CAMK_CDPK           | PK |
| F01_cb6039_c42/flp0/2375-0F | CAMK_CDPK           | PK |
| F01_cb6039_c42/flp0/2375-2F | CAMK_CDPK           | PK |
| F01_cb6039_c51/flp1/2182-0F | CAMK_CDPK           | PK |

---

---

|                             |           |    |
|-----------------------------|-----------|----|
| F01_cb6039_c53/flp1/2533-1F | CAMK_CDPK | PK |
| F01_cb6039_c56/flp1/3085-1R | CAMK_CDPK | PK |
| F01_cb6039_c56/flp1/3085-2R | CAMK_CDPK | PK |
| F01_cb6039_c58/flp1/2741-1F | CAMK_CDPK | PK |
| F01_cb6039_c59/flp0/2684-2F | CAMK_CDPK | PK |
| F01_cb6039_c63/flp0/2475-0F | CAMK_CDPK | PK |
| F01_cb6039_c65/flp0/2531-1F | CAMK_CDPK | PK |
| F01_cb6039_c66/flp0/2569-2F | CAMK_CDPK | PK |
| F01_cb6039_c68/flp1/2451-2F | CAMK_CDPK | PK |
| F01_cb6039_c75/flp0/2369-2F | CAMK_CDPK | PK |
| F01_cb6039_c8/flp0/2609-0F  | CAMK_CDPK | PK |
| F01_cb6039_c81/flp0/1608-1F | CAMK_CDPK | PK |
| F01_cb6039_c82/flp0/1413-2F | CAMK_CDPK | PK |
| F01_cb6039_c85/f5p1/2520-2F | CAMK_CDPK | PK |
| F01_cb6039_c86/f5p2/2402-1F | CAMK_CDPK | PK |
| F01_cb6039_c91/flp0/1362-0F | CAMK_CDPK | PK |
| F01_cb6039_c91/flp0/1362-1F | CAMK_CDPK | PK |
| F01_cb6103_c0/f5p0/1708-0F  | CMGC_CLK  | PK |
| F01_cb6103_c1/f3p0/1732-2F  | CMGC_CLK  | PK |
| F01_cb6103_c10/flp0/1635-1F | CMGC_CLK  | PK |
| F01_cb6103_c10/flp0/1635-2F | CMGC_CLK  | PK |
| F01_cb6103_c3/flp0/2950-0F  | CMGC_CLK  | PK |
| F01_cb6103_c3/flp0/2950-1F  | CMGC_CLK  | PK |
| F01_cb6103_c4/flp0/4044-2F  | CMGC_CLK  | PK |
| F01_cb6103_c5/flp0/2571-1F  | CMGC_CLK  | PK |
| F01_cb6103_c6/flp0/2906-0F  | CMGC_CLK  | PK |

---

---

|                              |                   |    |
|------------------------------|-------------------|----|
| F01_cb6103_c7/flp0/1725-1F   | CMGC_CLK          | PK |
| F01_cb6103_c8/flp0/1672-2F   | CMGC_CLK          | PK |
| F01_cb6106_c14/flp0/2093-0F  | CMGC_GSK          | PK |
| F01_cb6106_c14/flp0/2093-2F  | CMGC_GSK          | PK |
| F01_cb6106_c15/flp0/2059-0F  | CMGC_GSK          | PK |
| F01_cb6106_c15/flp0/2059-1F  | CMGC_GSK          | PK |
| F01_cb6106_c16/flp0/2075-1F  | CMGC_GSK          | PK |
| F01_cb6106_c17/flp0/2044-0F  | CMGC_GSK          | PK |
| F01_cb6106_c19/flp0/2246-0F  | CMGC_GSK          | PK |
| F01_cb6106_c23/fl4p0/1983-0F | CMGC_GSK          | PK |
| F01_cb6106_c23/fl4p0/1983-2F | CMGC_GSK          | PK |
| F01_cb6106_c25/flp0/2002-1F  | CMGC_GSK          | PK |
| F01_cb6106_c3/f2p0/2554-2F   | CMGC_GSK          | PK |
| F01_cb6106_c4/flp0/2932-0F   | CMGC_GSK          | PK |
| F01_cb6106_c4/flp0/2932-1F   | CMGC_GSK          | PK |
| F01_cb6106_c5/flp0/2598-2F   | CMGC_GSK          | PK |
| F01_cb6106_c6/flp0/4071-0F   | CMGC_GSK          | PK |
| F01_cb6106_c7/f4p0/1960-0F   | CMGC_GSK          | PK |
| F01_cb6106_c8/flp0/2021-0F   | CMGC_GSK          | PK |
| F01_cb6106_c9/flp0/2392-0F   | CMGC_GSK          | PK |
| F01_cb6106_c9/flp0/2392-1F   | CMGC_GSK          | PK |
| F01_cb6142_c0/flp1/2941-2F   | RLK-Pelle_DLSV    | PK |
| F01_cb6142_c1/flp0/2631-2F   | RLK-Pelle_DLSV    | PK |
| F01_cb6142_c2/flp0/2705-2F   | RLK-Pelle_DLSV    | PK |
| F01_cb6142_c4/flp0/2645-1F   | RLK-Pelle_DLSV    | PK |
| F01_cb6152_c1/f2p0/1940-0F   | RLK-Pelle_LRR-I-2 | PK |

---

---

|                             |                     |    |
|-----------------------------|---------------------|----|
| F01_cb6152_c1/f2p0/1940-2F  | RLK-Pelle_LRR-I-2   | PK |
| F01_cb6152_c2/f1p0/2925-0F  | RLK-Pelle_LRR-I-2   | PK |
| F01_cb6152_c2/f1p0/2925-1F  | RLK-Pelle_LRR-I-2   | PK |
| F01_cb6152_c3/f1p0/2053-1F  | RLK-Pelle_LRR-I-2   | PK |
| F01_cb6154_c11/f1p0/1844-0F | CAMK_CAMKL-CHK1     | PK |
| F01_cb6154_c12/f1p0/1775-1F | CAMK_CAMKL-CHK1     | PK |
| F01_cb6154_c13/f1p0/1708-1F | CAMK_CAMKL-CHK1     | PK |
| F01_cb6154_c16/f1p0/1636-0F | CAMK_CAMKL-CHK1     | PK |
| F01_cb6154_c17/f1p0/5308-1F | CAMK_CAMKL-CHK1     | PK |
| F01_cb6154_c3/f2p0/2864-1F  | CAMK_CAMKL-CHK1     | PK |
| F01_cb6154_c4/f2p1/1876-0F  | CAMK_CAMKL-CHK1     | PK |
| F01_cb6154_c5/f1p0/2695-0F  | CAMK_CAMKL-CHK1     | PK |
| F01_cb6154_c6/f1p0/1975-0F  | CAMK_CAMKL-CHK1     | PK |
| F01_cb6154_c7/f1p0/1877-1F  | CAMK_CAMKL-CHK1     | PK |
| F01_cb6154_c7/f1p0/1877-2F  | CAMK_CAMKL-CHK1     | PK |
| F01_cb6154_c8/f1p1/1841-1F  | CAMK_CAMKL-CHK1     | PK |
| F01_cb6154_c9/f1p0/1854-0F  | CAMK_CAMKL-CHK1     | PK |
| F01_cb6154_c9/f1p0/1854-1F  | CAMK_CAMKL-CHK1     | PK |
| F01_cb6164_c2/f2p0/2370-1F  | RLK-Pelle_CrRLK1L-1 | PK |
| F01_cb6164_c5/f1p1/2560-0F  | RLK-Pelle_CrRLK1L-1 | PK |
| F01_cb6164_c5/f1p1/2560-1F  | RLK-Pelle_CrRLK1L-1 | PK |
| F01_cb6164_c6/f1p0/2802-1F  | RLK-Pelle_CrRLK1L-1 | PK |
| F01_cb6164_c7/f1p0/2587-1F  | RLK-Pelle_CrRLK1L-1 | PK |
| F01_cb6164_c7/f1p0/2587-2F  | RLK-Pelle_CrRLK1L-1 | PK |
| F01_cb6164_c9/f1p0/2594-0F  | RLK-Pelle_CrRLK1L-1 | PK |
| F01_cb6164_c9/f1p0/2594-2F  | RLK-Pelle_CrRLK1L-1 | PK |

---



---

|                             |                        |    |
|-----------------------------|------------------------|----|
| F01_cb6168_c0/f3p0/2896-0F  | RLK-Pelle_WAK_LRK10L-1 | PK |
| F01_cb6168_c5/f1p0/2385-0F  | RLK-Pelle_WAK_LRK10L-1 | PK |
| F01_cb6168_c5/f1p0/2385-1F  | RLK-Pelle_WAK_LRK10L-1 | PK |
| F01_cb6168_c5/f1p0/2385-2F  | RLK-Pelle_WAK_LRK10L-1 | PK |
| F01_cb6172_c0/f3p0/2431-1F  | RLK-Pelle_LysM         | PK |
| F01_cb6172_c2/f1p0/2920-1F  | RLK-Pelle_LysM         | PK |
| F01_cb6172_c3/f1p0/2797-1F  | RLK-Pelle_LysM         | PK |
| F01_cb6172_c6/f1p0/2744-0F  | RLK-Pelle_LysM         | PK |
| F01_cb6172_c6/f1p0/2744-1F  | RLK-Pelle_LysM         | PK |
| F01_cb6172_c6/f1p0/2744-2F  | RLK-Pelle_LysM         | PK |
| F01_cb6180_c2/f1p1/2707-0F  | TLK                    | PK |
| F01_cb6180_c4/f1p0/2938-0F  | TLK                    | PK |
| F01_cb6192_c0/f2p0/2889-1F  | RLK-Pelle_DLSV         | PK |
| F01_cb6217_c22/f1p0/2893-2F | CMGC_SRPK              | PK |
| F01_cb6217_c3/f5p0/2029-2F  | CMGC_SRPK              | PK |
| F01_cb6217_c8/f1p0/2090-2F  | CMGC_SRPK              | PK |
| F01_cb6217_c9/f1p0/1956-0F  | CMGC_SRPK              | PK |
| F01_cb6257_c0/f3p0/2850-0F  | RLK-Pelle_LRR-VI-1     | PK |
| F01_cb6257_c0/f3p0/2850-1F  | RLK-Pelle_LRR-VI-1     | PK |
| F01_cb6257_c3/f1p0/2912-0F  | RLK-Pelle_LRR-VI-1     | PK |
| F01_cb6257_c4/f1p0/2896-2F  | RLK-Pelle_LRR-VI-1     | PK |
| F01_cb6277_c11/f1p1/1926-1F | RLK-Pelle_RLCK-XII-1   | PK |
| F01_cb6277_c13/f1p0/2679-1F | RLK-Pelle_RLCK-XII-1   | PK |
| F01_cb6277_c14/f1p1/2588-1F | RLK-Pelle_RLCK-XII-1   | PK |
| F01_cb6277_c14/f1p1/2588-2F | RLK-Pelle_RLCK-XII-1   | PK |
| F01_cb6277_c15/f1p1/2535-1F | RLK-Pelle_RLCK-XII-1   | PK |

---

---

|                              |                      |    |
|------------------------------|----------------------|----|
| F01_cb6277_c18/f1p0/2697-1F  | RLK-Pelle_RLCK-XII-1 | PK |
| F01_cb6277_c19/f1p1/2357-0F  | RLK-Pelle_RLCK-XII-1 | PK |
| F01_cb6277_c20/f1p1/2469-2F  | RLK-Pelle_RLCK-XII-1 | PK |
| F01_cb6277_c23/f1p0/2504-1F  | RLK-Pelle_RLCK-XII-1 | PK |
| F01_cb6277_c24/f1p0/2733-0F  | RLK-Pelle_RLCK-XII-1 | PK |
| F01_cb6277_c26/f1p0/2524-2F  | RLK-Pelle_RLCK-XII-1 | PK |
| F01_cb6277_c30/f4p0/2856-2F  | RLK-Pelle_RLCK-XII-1 | PK |
| F01_cb6277_c4/f3p1/2489-1F   | RLK-Pelle_RLCK-XII-1 | PK |
| F01_cb6277_c5/f2p1/2240-0F   | RLK-Pelle_RLCK-XII-1 | PK |
| F01_cb6277_c7/f1p0/2614-1F   | RLK-Pelle_RLCK-XII-1 | PK |
| F01_cb6277_c8/f1p0/2793-2F   | RLK-Pelle_RLCK-XII-1 | PK |
| F01_cb6277_c9/f1p1/3706-0F   | RLK-Pelle_RLCK-XII-1 | PK |
| F01_cb6277_c9/f1p1/3706-2F   | RLK-Pelle_RLCK-XII-1 | PK |
| F01_cb6291_c0/f2p0/2911-0F   | IRE1                 | PK |
| F01_cb6291_c1/f2p0/2894-0F   | IRE1                 | PK |
| F01_cb6291_c2/f1p0/3168-0F   | IRE1                 | PK |
| F01_cb6291_c3/f1p0/2781-2F   | IRE1                 | PK |
| F01_cb6291_c4/f1p0/2908-2F   | IRE1                 | PK |
| F01_cb6297_c10/f1p0/2453-0F  | CAMK_CAMKL-CHK1      | PK |
| F01_cb6297_c11/f1p0/2459-1F  | CAMK_CAMKL-CHK1      | PK |
| F01_cb6297_c12/f1p0/2314-2F  | CAMK_CAMKL-CHK1      | PK |
| F01_cb6297_c18/f1p0/5398-0F  | CAMK_CAMKL-CHK1      | PK |
| F01_cb6297_c20/f14p0/2230-0F | CAMK_CAMKL-CHK1      | PK |
| F01_cb6297_c4/f1p0/2892-0F   | CAMK_CAMKL-CHK1      | PK |
| F01_cb6297_c4/f1p0/2892-1F   | CAMK_CAMKL-CHK1      | PK |
| F01_cb6297_c6/f1p1/2256-0F   | CAMK_CAMKL-CHK1      | PK |

---

---

|                             |                     |    |
|-----------------------------|---------------------|----|
| F01_cb6297_c7/flp0/2439-0F  | CAMK_CAMKL-CHK1     | PK |
| F01_cb6297_c7/flp0/2439-1F  | CAMK_CAMKL-CHK1     | PK |
| F01_cb6304_c1/flp0/1993-0F  | RLK-Pelle_LRR-XIIIa | PK |
| F01_cb6340_c10/flp0/2833-1F | CAMK_CDPK           | PK |
| F01_cb6340_c11/flp1/2433-0F | CAMK_CDPK           | PK |
| F01_cb6340_c11/flp1/2433-1F | CAMK_CDPK           | PK |
| F01_cb6340_c11/flp1/2433-2F | CAMK_CDPK           | PK |
| F01_cb6340_c14/flp0/2054-2F | CAMK_CDPK           | PK |
| F01_cb6340_c15/flp0/2223-0F | CAMK_CDPK           | PK |
| F01_cb6340_c17/flp0/2148-1F | CAMK_CDPK           | PK |
| F01_cb6340_c17/flp0/2148-2F | CAMK_CDPK           | PK |
| F01_cb6340_c22/flp0/2535-2F | CAMK_CDPK           | PK |
| F01_cb6340_c30/flp0/2439-0F | CAMK_CDPK           | PK |
| F01_cb6340_c30/flp0/2439-1F | CAMK_CDPK           | PK |
| F01_cb6340_c37/flp2/2383-1F | CAMK_CDPK           | PK |
| F01_cb6357_c14/flp0/2611-0F | AGC_PDK1            | PK |
| F01_cb6357_c3/flp0/2878-0F  | AGC_PDK1            | PK |
| F01_cb6357_c3/flp0/2878-1F  | AGC_PDK1            | PK |
| F01_cb6357_c5/flp0/2208-1F  | AGC_PDK1            | PK |
| F01_cb6357_c5/flp0/2208-2F  | AGC_PDK1            | PK |
| F01_cb6357_c6/flp0/2668-2F  | AGC_PDK1            | PK |
| F01_cb6357_c8/flp0/2626-0F  | AGC_PDK1            | PK |
| F01_cb6357_c9/flp0/2483-0F  | AGC_PDK1            | PK |
| F01_cb6385_c1/flp1/2871-1F  | CAMK_CDPK           | PK |
| F01_cb6385_c2/flp0/1994-2F  | CAMK_CDPK           | PK |
| F01_cb6399_c5/flp0/2869-0R  | CK1_CK1             | PK |

---

---

|                             |                     |    |
|-----------------------------|---------------------|----|
| F01_cb6399_c6/flp0/2830-2R  | CK1_CK1             | PK |
| F01_cb6406_c10/flp0/2739-0F | RLK-Pelle_CrRLK1L-1 | PK |
| F01_cb6406_c11/flp0/2536-0F | RLK-Pelle_CrRLK1L-1 | PK |
| F01_cb6406_c11/flp0/2536-1F | RLK-Pelle_CrRLK1L-1 | PK |
| F01_cb6406_c11/flp0/2536-2F | RLK-Pelle_CrRLK1L-1 | PK |
| F01_cb6406_c12/flp0/2317-0F | RLK-Pelle_CrRLK1L-1 | PK |
| F01_cb6406_c13/flp0/2482-0F | RLK-Pelle_CrRLK1L-1 | PK |
| F01_cb6406_c13/flp0/2482-2F | RLK-Pelle_CrRLK1L-1 | PK |
| F01_cb6406_c27/f2p1/3235-1F | CMGC_CDK-CRK7-CDK9  | PK |
| F01_cb6406_c37/flp0/3004-0F | CMGC_CDK-CRK7-CDK9  | PK |
| F01_cb6406_c37/flp0/3004-1F | CMGC_CDK-CRK7-CDK9  | PK |
| F01_cb6406_c38/flp0/3157-2F | CMGC_CDK-CRK7-CDK9  | PK |
| F01_cb6406_c39/flp0/3171-0F | CMGC_CDK-CRK7-CDK9  | PK |
| F01_cb6406_c6/f2p0/3266-2F  | CMGC_CDK-CRK7-CDK9  | PK |
| F01_cb6406_c60/flp0/2062-0F | RLK-Pelle_CrRLK1L-1 | PK |
| F01_cb6406_c63/flp0/2891-1F | CMGC_CDK-CRK7-CDK9  | PK |
| F01_cb6406_c66/flp0/1774-0F | RLK-Pelle_CrRLK1L-1 | PK |
| F01_cb6406_c7/f2p1/3045-2F  | CMGC_CDK-CRK7-CDK9  | PK |
| F01_cb6406_c9/flp0/2859-2F  | RLK-Pelle_CrRLK1L-1 | PK |
| F01_cb6408_c1/flp0/3208-0F  | TTK                 | PK |
| F01_cb6408_c1/flp0/3208-2F  | TTK                 | PK |
| F01_cb6433_c2/flp0/2665-2F  | RLK-Pelle_RLCK-XVI  | PK |
| F01_cb6433_c3/flp0/2643-2F  | RLK-Pelle_RLCK-XVI  | PK |
| F01_cb6433_c4/flp0/2420-0F  | RLK-Pelle_RLCK-XVI  | PK |
| F01_cb6433_c5/flp0/2672-1F  | RLK-Pelle_RLCK-XVI  | PK |
| F01_cb6440_c0/f6p0/2480-2F  | RLK-Pelle_LRR-III   | PK |

---

---

|                            |                       |    |
|----------------------------|-----------------------|----|
| F01_cb6440_c2/f3p0/2455-1F | RLK-Pelle_LRR-III     | PK |
| F01_cb6440_c2/f3p0/2455-2F | RLK-Pelle_LRR-III     | PK |
| F01_cb6440_c3/f2p0/2488-1F | RLK-Pelle_LRR-III     | PK |
| F01_cb6440_c7/f1p0/2264-2F | RLK-Pelle_LRR-III     | PK |
| F01_cb6445_c2/f3p0/1815-2F | RLK-Pelle_RLCK-VIIa-2 | PK |
| F01_cb6445_c3/f2p0/2196-1F | RLK-Pelle_RLCK-VIIa-2 | PK |
| F01_cb6445_c4/f2p0/1559-2F | RLK-Pelle_RLCK-VIIa-2 | PK |
| F01_cb6445_c6/f1p0/2014-2F | RLK-Pelle_RLCK-VIIa-2 | PK |
| F01_cb6445_c7/f1p0/1629-0F | RLK-Pelle_RLCK-VIIa-2 | PK |
| F01_cb6463_c4/f1p1/2826-1R | CMGC_RCK              | PK |
| F01_cb6483_c0/f4p0/2606-2F | RLK-Pelle_LRR-III     | PK |
| F01_cb6483_c1/f4p0/2645-2F | RLK-Pelle_LRR-III     | PK |
| F01_cb6483_c4/f1p0/2780-1F | RLK-Pelle_LRR-III     | PK |
| F01_cb6483_c5/f1p0/2297-2F | RLK-Pelle_LRR-III     | PK |
| F01_cb6483_c6/f1p0/2684-1F | RLK-Pelle_LRR-III     | PK |
| F01_cb6483_c7/f1p0/2790-0F | RLK-Pelle_LRR-III     | PK |
| F01_cb6483_c7/f1p0/2790-1F | RLK-Pelle_LRR-III     | PK |
| F01_cb6483_c9/f1p0/2727-0F | RLK-Pelle_LRR-III     | PK |
| F01_cb6483_c9/f1p0/2727-2F | RLK-Pelle_LRR-III     | PK |
| F01_cb648_c3/f1p1/3872-0F  | RLK-Pelle_LRR-VII-1   | PK |
| F01_cb648_c4/f1p0/3842-2F  | RLK-Pelle_LRR-VII-1   | PK |
| F01_cb648_c9/f1p0/3724-1F  | RLK-Pelle_LRR-VII-1   | PK |
| F01_cb6491_c2/f1p0/4290-0F | RLK-Pelle_LRR-XII-1   | PK |
| F01_cb6491_c2/f1p0/4290-2F | RLK-Pelle_LRR-XII-1   | PK |
| F01_cb6491_c3/f1p0/3487-0F | RLK-Pelle_LRR-XII-1   | PK |
| F01_cb6491_c5/f1p0/3634-1F | RLK-Pelle_LRR-XII-1   | PK |

---

---

|                             |                     |    |
|-----------------------------|---------------------|----|
| F01_cb6491_c6/flp1/3274-2F  | RLK-Pelle_LRR-XII-1 | PK |
| F01_cb6491_c7/flp0/3118-1F  | RLK-Pelle_LRR-XII-1 | PK |
| F01_cb6491_c8/flp1/3298-2F  | RLK-Pelle_LRR-XII-1 | PK |
| F01_cb6491_c9/flp0/2466-0F  | RLK-Pelle_LRR-XII-1 | PK |
| F01_cb6505_c12/flp3/2615-1F | RLK-Pelle_LRR-XIIIa | PK |
| F01_cb6505_c15/flp0/2339-2F | RLK-Pelle_LRR-XIIIa | PK |
| F01_cb6505_c19/flp1/2616-2F | RLK-Pelle_LRR-XIIIa | PK |
| F01_cb6505_c21/flp3/2574-0F | RLK-Pelle_LRR-XIIIa | PK |
| F01_cb6505_c22/flp2/2613-2F | RLK-Pelle_LRR-XIIIa | PK |
| F01_cb6505_c5/flp0/2839-0F  | RLK-Pelle_LRR-XIIIa | PK |
| F01_cb6505_c9/flp0/2473-2F  | RLK-Pelle_LRR-XIIIa | PK |
| F01_cb6512_c1/flp0/2849-0F  | STE_STE11           | PK |
| F01_cb6512_c1/flp0/2849-1F  | STE_STE11           | PK |
| F01_cb6512_c2/flp0/2743-0F  | STE_STE11           | PK |
| F01_cb6512_c2/flp0/2743-2F  | TKL-Cr-3            | PK |
| F01_cb6549_c2/flp0/2346-2F  | TKL-PI-7            | PK |
| F01_cb6549_c3/flp0/2119-1F  | TKL-PI-7            | PK |
| F01_cb6549_c7/flp0/1775-0F  | TKL-PI-7            | PK |
| F01_cb654_c11/flp0/1637-1F  | RLK-Pelle_PERK-2    | PK |
| F01_cb654_c2/flp0/4697-0F   | RLK-Pelle_PERK-2    | PK |
| F01_cb654_c2/flp0/4697-1F   | RLK-Pelle_PERK-2    | PK |
| F01_cb654_c3/flp0/4488-0F   | RLK-Pelle_PERK-2    | PK |
| F01_cb654_c3/flp0/4488-1F   | RLK-Pelle_PERK-2    | PK |
| F01_cb654_c7/flp0/2369-0F   | RLK-Pelle_PERK-2    | PK |
| F01_cb654_c7/flp0/2369-1F   | RLK-Pelle_PERK-2    | PK |
| F01_cb654_c8/flp0/2465-0F   | RLK-Pelle_PERK-2    | PK |

---

---

|                             |                    |    |
|-----------------------------|--------------------|----|
| F01_cb654_c9/f1p0/2672-1F   | RLK-Pelle_PERK-2   | PK |
| F01_cb6554_c0/f4p0/2759-2F  | RLK-Pelle_CR4L     | PK |
| F01_cb6554_c2/f2p0/2726-0F  | RLK-Pelle_CR4L     | PK |
| F01_cb6564_c0/f1p0/2770-0F  | RLK-Pelle_SD-2b    | PK |
| F01_cb6564_c0/f1p0/2770-1F  | RLK-Pelle_SD-2b    | PK |
| F01_cb6564_c1/f1p0/2552-1F  | RLK-Pelle_SD-2b    | PK |
| F01_cb6564_c1/f1p0/2552-2F  | RLK-Pelle_SD-2b    | PK |
| F01_cb6564_c3/f1p0/2730-0F  | RLK-Pelle_SD-2b    | PK |
| F01_cb6564_c3/f1p0/2730-1F  | RLK-Pelle_SD-2b    | PK |
| F01_cb6575_c0/f3p0/2822-2F  | RLK-Pelle_L-LEC    | PK |
| F01_cb6575_c2/f1p0/2916-0F  | RLK-Pelle_L-LEC    | PK |
| F01_cb6575_c2/f1p0/2916-2F  | RLK-Pelle_L-LEC    | PK |
| F01_cb6575_c4/f1p0/2749-1F  | RLK-Pelle_L-LEC    | PK |
| F01_cb6632_c0/f1p0/2800-0F  | CMGC_CDK-CRK7-CDK9 | PK |
| F01_cb6632_c1/f1p0/2571-0F  | CMGC_CDK-CRK7-CDK9 | PK |
| F01_cb6670_c3/f1p0/3029-0F  | RLK-Pelle_SD-2b    | PK |
| F01_cb6670_c6/f1p0/2428-1F  | RLK-Pelle_SD-2b    | PK |
| F01_cb6670_c7/f1p1/2713-1F  | RLK-Pelle_SD-2b    | PK |
| F01_cb6670_c8/f1p1/2713-2F  | RLK-Pelle_SD-2b    | PK |
| F01_cb6689_c16/f1p0/2383-0F | CAMK_CAMKL-CHK1    | PK |
| F01_cb6689_c16/f1p0/2383-1F | CAMK_CAMKL-CHK1    | PK |
| F01_cb6689_c3/f3p0/2447-1F  | CAMK_CAMKL-CHK1    | PK |
| F01_cb6689_c30/f2p1/2359-1F | CAMK_CAMKL-CHK1    | PK |
| F01_cb6689_c31/f3p2/2467-2F | CAMK_CAMKL-CHK1    | PK |
| F01_cb6689_c5/f1p0/2769-0F  | CAMK_CAMKL-CHK1    | PK |
| F01_cb6689_c8/f1p2/2473-1F  | CAMK_CAMKL-CHK1    | PK |

---

---

|                              |                    |    |
|------------------------------|--------------------|----|
| F01_cb6691_c10/flp0/2598-2F  | RLK-Pelle_LRK10L-2 | PK |
| F01_cb6691_c13/flp0/2308-2F  | RLK-Pelle_LRK10L-2 | PK |
| F01_cb6691_c18/flp0/1446-1F  | RLK-Pelle_LRK10L-2 | PK |
| F01_cb6691_c21/flp0/2327-0F  | RLK-Pelle_LRK10L-2 | PK |
| F01_cb6691_c22/fl3p0/2328-1F | RLK-Pelle_LRK10L-2 | PK |
| F01_cb6691_c3/f3p0/2333-1F   | RLK-Pelle_LRK10L-2 | PK |
| F01_cb6691_c6/f2p0/2298-2F   | RLK-Pelle_LRK10L-2 | PK |
| F01_cb6691_c7/flp0/2792-2F   | RLK-Pelle_LRK10L-2 | PK |
| F01_cb6691_c9/flp0/2602-0F   | RLK-Pelle_LRK10L-2 | PK |
| F01_cb6694_c0/flp0/2797-1F   | RLK-Pelle_DLSV     | PK |
| F01_cb6694_c0/flp0/2797-2F   | RLK-Pelle_DLSV     | PK |
| F01_cb6694_c1/flp0/2607-0F   | RLK-Pelle_DLSV     | PK |
| F01_cb6694_c3/flp0/1269-0F   | RLK-Pelle_DLSV     | PK |
| F01_cb6762_c2/f2p1/2774-2F   | RLK-Pelle_LRR-V    | PK |
| F01_cb6762_c6/flp0/2680-0F   | RLK-Pelle_LRR-V    | PK |
| F01_cb6785_c11/flp0/2230-2F  | AGC_NDR            | PK |
| F01_cb6785_c14/flp0/2376-1F  | AGC_NDR            | PK |
| F01_cb6785_c16/flp0/2272-0F  | AGC_NDR            | PK |
| F01_cb6785_c17/flp0/2283-2F  | AGC_NDR            | PK |
| F01_cb6785_c2/f2p0/2387-0F   | AGC_NDR            | PK |
| F01_cb6785_c4/flp0/2768-2F   | AGC_NDR            | PK |
| F01_cb6785_c5/flp0/2019-0F   | AGC_NDR            | PK |
| F01_cb6785_c7/flp0/2303-0F   | AGC_NDR            | PK |
| F01_cb6790_c12/flp0/2413-2F  | RLK-Pelle_LRR-III  | PK |
| F01_cb6790_c16/flp0/2426-0F  | RLK-Pelle_LRR-III  | PK |
| F01_cb6790_c16/flp0/2426-2F  | RLK-Pelle_LRR-III  | PK |

---



---

|                             |                    |    |
|-----------------------------|--------------------|----|
| F01_cb6790_c17/flp0/2515-0F | RLK-Pelle_LRR-III  | PK |
| F01_cb6790_c19/flp0/2397-2F | RLK-Pelle_LRR-III  | PK |
| F01_cb6790_c2/f2p0/2405-0F  | RLK-Pelle_LRR-III  | PK |
| F01_cb6790_c21/flp0/2623-0F | RLK-Pelle_LRR-III  | PK |
| F01_cb6790_c21/flp0/2623-1F | RLK-Pelle_LRR-III  | PK |
| F01_cb6790_c23/flp0/2273-2F | RLK-Pelle_LRR-III  | PK |
| F01_cb6790_c24/flp0/2508-2F | RLK-Pelle_LRR-III  | PK |
| F01_cb6790_c7/f2p0/2723-1F  | RLK-Pelle_LRR-III  | PK |
| F01_cb6790_c9/flp0/2450-1F  | RLK-Pelle_LRR-III  | PK |
| F01_cb6887_c2/flp2/2927-1F  | RLK-Pelle_RLCK-IXb | PK |
| F01_cb6887_c3/flp1/2908-0F  | RLK-Pelle_RLCK-IXb | PK |
| F01_cb6887_c4/flp0/2608-2F  | RLK-Pelle_RLCK-IXb | PK |
| F01_cb6894_c5/flp0/2753-0R  | CAMK_CDPK          | PK |
| F01_cb6903_c10/flp0/2429-0F | TKL-PI-1           | PK |
| F01_cb6903_c11/flp0/2427-0F | TKL-PI-1           | PK |
| F01_cb6903_c11/flp0/2427-1F | TKL-PI-1           | PK |
| F01_cb6903_c13/flp0/2361-2F | TKL-PI-1           | PK |
| F01_cb6903_c14/flp1/2425-1F | TKL-PI-1           | PK |
| F01_cb6903_c15/flp0/2342-2F | TKL-PI-1           | PK |
| F01_cb6903_c16/flp1/2369-0F | TKL-PI-1           | PK |
| F01_cb6903_c17/flp0/2350-0F | TKL-PI-1           | PK |
| F01_cb6903_c21/flp0/2350-1F | TKL-PI-1           | PK |
| F01_cb6903_c24/flp0/2542-0F | TKL-PI-1           | PK |
| F01_cb6903_c26/flp0/2659-0F | TKL-PI-1           | PK |
| F01_cb6903_c27/flp0/2646-1F | TKL-PI-1           | PK |
| F01_cb6903_c29/flp0/2343-0F | TKL-PI-1           | PK |

---

---

|                             |                 |    |
|-----------------------------|-----------------|----|
| F01_cb6903_c8/f1p0/2744-1F  | TKL-PI-1        | PK |
| F01_cb690_c11/f1p0/2668-1F  | CMGC_DYRK-PRP4  | PK |
| F01_cb690_c5/f1p0/4466-0F   | CMGC_DYRK-PRP4  | PK |
| F01_cb690_c7/f1p0/4210-1F   | CMGC_DYRK-PRP4  | PK |
| F01_cb690_c8/f1p0/3878-0F   | CMGC_DYRK-PRP4  | PK |
| F01_cb6915_c0/f1p0/2741-2F  | STE_STE11       | PK |
| F01_cb6915_c2/f1p0/1684-2F  | STE_STE11       | PK |
| F01_cb6929_c0/f6p0/2681-1F  | RLK-Pelle_L-LEC | PK |
| F01_cb6929_c11/f3p0/2427-2F | RLK-Pelle_L-LEC | PK |
| F01_cb6929_c3/f1p0/2665-2F  | RLK-Pelle_L-LEC | PK |
| F01_cb6929_c8/f1p0/2638-0F  | RLK-Pelle_L-LEC | PK |
| F01_cb6951_c5/f1p0/2490-0F  | TKL-PI-4        | PK |
| F01_cb6951_c5/f1p0/2490-2F  | TKL-PI-4        | PK |
| F01_cb6951_c6/f1p0/2600-0F  | TKL-PI-4        | PK |
| F01_cb696_c12/f1p0/4499-0F  | TKL-PI-6        | PK |
| F01_cb696_c15/f1p1/4487-1F  | TKL-PI-6        | PK |
| F01_cb696_c3/f2p2/4704-2F   | TKL-PI-6        | PK |
| F01_cb696_c9/f1p0/4548-2F   | TKL-PI-6        | PK |
| F01_cb6977_c7/f3p0/2504-0F  | CAMK_CDPK       | PK |
| F01_cb6993_c10/f1p1/2358-0F | AGC_NDR         | PK |
| F01_cb6993_c11/f1p1/2588-1F | AGC_NDR         | PK |
| F01_cb6993_c15/f1p1/1940-1F | AGC_NDR         | PK |
| F01_cb6993_c17/f1p0/2283-0F | AGC_NDR         | PK |
| F01_cb6993_c18/f3p1/2383-1F | AGC_NDR         | PK |
| F01_cb6993_c19/f3p1/2522-0F | AGC_NDR         | PK |
| F01_cb6993_c5/f1p0/2362-2F  | AGC_NDR         | PK |

---

---

|                             |                    |    |
|-----------------------------|--------------------|----|
| F01_cb6993_c6/flp0/2793-0F  | AGC_NDR            | PK |
| F01_cb6993_c7/flp1/2590-0F  | AGC_NDR            | PK |
| F01_cb6998_c1/flp0/2718-1F  | RLK-Pelle_LRR-VI-2 | PK |
| F01_cb6998_c2/flp0/2676-1F  | RLK-Pelle_LRR-VI-2 | PK |
| F01_cb7016_c10/flp0/3046-2F | TKL_CTRL1-DRK-2    | PK |
| F01_cb7016_c11/flp0/3457-2F | TKL_CTRL1-DRK-2    | PK |
| F01_cb7016_c13/flp0/3328-2F | TKL_CTRL1-DRK-2    | PK |
| F01_cb7016_c16/flp0/3082-0F | TKL_CTRL1-DRK-2    | PK |
| F01_cb7016_c17/flp0/3309-0F | TKL_CTRL1-DRK-2    | PK |
| F01_cb7016_c23/flp0/3517-0F | TKL_CTRL1-DRK-2    | PK |
| F01_cb7016_c24/flp0/3513-2F | TKL_CTRL1-DRK-2    | PK |
| F01_cb7016_c27/flp0/3427-1F | TKL_CTRL1-DRK-2    | PK |
| F01_cb7016_c28/flp0/3512-1F | TKL_CTRL1-DRK-2    | PK |
| F01_cb7016_c30/flp1/3494-0F | TKL_CTRL1-DRK-2    | PK |
| F01_cb7016_c8/flp0/3581-0F  | TKL_CTRL1-DRK-2    | PK |
| F01_cb7016_c8/flp0/3581-2F  | TKL_CTRL1-DRK-2    | PK |
| F01_cb7016_c9/flp0/3305-2F  | TKL_CTRL1-DRK-2    | PK |
| F01_cb7074_c0/flp0/2607-2F  | RLK-Pelle_RLCK-XI  | PK |
| F01_cb7074_c2/flp0/2389-1F  | RLK-Pelle_RLCK-XI  | PK |
| F01_cb7074_c3/flp0/1703-2F  | RLK-Pelle_RLCK-XI  | PK |
| F01_cb7088_c10/flp0/2704-0F | CMGC_GSK           | PK |
| F01_cb7088_c10/flp0/2704-1F | CMGC_GSK           | PK |
| F01_cb7088_c11/flp0/2918-2F | CMGC_GSK           | PK |
| F01_cb7088_c12/flp0/2354-1F | CMGC_GSK           | PK |
| F01_cb7088_c13/flp0/2088-0F | CMGC_GSK           | PK |
| F01_cb7088_c14/flp0/2041-0F | CMGC_GSK           | PK |

---

---

|                              |                   |    |
|------------------------------|-------------------|----|
| F01_cb7088_c15/flp0/1821-2F  | CMGC_GSK          | PK |
| F01_cb7088_c21/fl5p0/1737-2F | CMGC_GSK          | PK |
| F01_cb7088_c25/flp0/1664-0F  | CMGC_GSK          | PK |
| F01_cb7088_c4/f5p0/1585-1F   | CMGC_GSK          | PK |
| F01_cb7088_c6/flp0/2700-1F   | CMGC_GSK          | PK |
| F01_cb7088_c7/flp0/1907-1F   | CMGC_GSK          | PK |
| F01_cb7088_c9/flp0/2325-2F   | CMGC_GSK          | PK |
| F01_cb7138_c0/f3p0/2364-0F   | RLK-Pelle_LRR-III | PK |
| F01_cb7138_c0/f3p0/2364-1F   | RLK-Pelle_LRR-III | PK |
| F01_cb7138_c2/flp0/2379-0F   | RLK-Pelle_LRR-III | PK |
| F01_cb7150_c0/f2p0/2634-0F   | CAMK_CDPK         | PK |
| F01_cb7150_c1/flp0/2682-2F   | CAMK_CDPK         | PK |
| F01_cb7150_c3/flp0/3108-2F   | CAMK_CDPK         | PK |
| F01_cb7195_c2/fl2p0/2637-1F  | RLK-Pelle_L-LEC   | PK |
| F01_cb7195_c21/f9p0/2661-1F  | RLK-Pelle_L-LEC   | PK |
| F01_cb7195_c22/f3p0/2696-2F  | RLK-Pelle_L-LEC   | PK |
| F01_cb7195_c9/flp0/2681-2F   | RLK-Pelle_L-LEC   | PK |
| F01_cb7196_c0/f4p0/2676-0F   | RLK-Pelle_SD-2b   | PK |
| F01_cb7196_c1/flp0/2724-1F   | RLK-Pelle_SD-2b   | PK |
| F01_cb7201_c12/flp0/2678-0F  | CAMK_CDPK         | PK |
| F01_cb7201_c15/flp2/2408-0F  | CAMK_CDPK         | PK |
| F01_cb7201_c25/flp0/2368-0F  | CAMK_CDPK         | PK |
| F01_cb7201_c25/flp0/2368-2F  | CAMK_CDPK         | PK |
| F01_cb7201_c28/flp1/2384-0F  | CAMK_CDPK         | PK |
| F01_cb7201_c29/flp2/2668-0F  | CAMK_CDPK         | PK |
| F01_cb7201_c31/flp1/2612-1F  | CAMK_CDPK         | PK |

---

---

|                              |                    |    |
|------------------------------|--------------------|----|
| F01_cb7201_c34/f1p0/2568-1F  | CAMK_CDPK          | PK |
| F01_cb7201_c36/f1p1/2177-2F  | CAMK_CDPK          | PK |
| F01_cb7201_c38/f1p0/2544-1F  | CAMK_CDPK          | PK |
| F01_cb7201_c44/f1p0/2593-1F  | CAMK_CDPK          | PK |
| F01_cb7201_c54/f18p2/2387-2F | CAMK_CDPK          | PK |
| F01_cb7201_c9/f2p2/2605-2F   | CAMK_CDPK          | PK |
| F01_cb7231_c17/f39p2/2330-2F | CMGC_MAPK          | PK |
| F01_cb7231_c2/f1p0/2285-1F   | CMGC_MAPK          | PK |
| F01_cb7231_c2/f1p0/2285-2F   | CMGC_MAPK          | PK |
| F01_cb7231_c6/f1p0/2665-2F   | CMGC_MAPK          | PK |
| F01_cb7238_c2/f1p0/2602-0F   | TKL-PI-4           | PK |
| F01_cb7246_c4/f1p2/2674-0F   | RLK-Pelle_LRR-III  | PK |
| F01_cb7246_c5/f1p2/2841-1F   | RLK-Pelle_LRR-III  | PK |
| F01_cb7246_c6/f1p0/2850-2F   | RLK-Pelle_LRR-III  | PK |
| F01_cb7289_c1/f4p0/2280-0F   | RLK-Pelle_RKF3     | PK |
| F01_cb7289_c1/f4p0/2280-1F   | RLK-Pelle_RKF3     | PK |
| F01_cb7289_c2/f1p1/2655-1F   | RLK-Pelle_RKF3     | PK |
| F01_cb7289_c2/f1p1/2655-2F   | RLK-Pelle_RKF3     | PK |
| F01_cb7289_c3/f1p0/2299-0F   | RLK-Pelle_RKF3     | PK |
| F01_cb7289_c3/f1p0/2299-1F   | RLK-Pelle_RKF3     | PK |
| F01_cb7289_c5/f1p0/2601-2F   | RLK-Pelle_RKF3     | PK |
| F01_cb7289_c6/f1p0/2261-0F   | RLK-Pelle_RKF3     | PK |
| F01_cb7289_c7/f1p0/1719-2F   | RLK-Pelle_RKF3     | PK |
| F01_cb7300_c1/f2p1/2552-0F   | CMGC_CDK-CRK7-CDK9 | PK |
| F01_cb7300_c3/f1p0/2340-0F   | CMGC_CDK-CRK7-CDK9 | PK |
| F01_cb7300_c3/f1p0/2340-2F   | CMGC_CDK-CRK7-CDK9 | PK |

---

---

|                             |                    |    |
|-----------------------------|--------------------|----|
| F01_cb7313_c0/f1p0/2641-0F  | RLK-Pelle_LRR-XI-1 | PK |
| F01_cb7313_c1/f1p0/3338-2F  | RLK-Pelle_LRR-XI-1 | PK |
| F01_cb7321_c14/f2p0/2550-2F | CAMK_CDPK          | PK |
| F01_cb7321_c3/f2p0/2605-2F  | CAMK_CDPK          | PK |
| F01_cb7321_c5/f2p0/2199-0F  | CAMK_CDPK          | PK |
| F01_cb7321_c6/f1p0/2620-1F  | CAMK_CDPK          | PK |
| F01_cb7321_c6/f1p0/2620-2F  | CAMK_CDPK          | PK |
| F01_cb7328_c10/f4p0/2211-1F | RLK-Pelle_LRR-VI-2 | PK |
| F01_cb7328_c11/f2p0/2266-1F | RLK-Pelle_LRR-VI-2 | PK |
| F01_cb7328_c2/f1p0/2693-0F  | RLK-Pelle_LRR-VI-2 | PK |
| F01_cb7328_c4/f1p0/2098-2F  | RLK-Pelle_LRR-VI-2 | PK |
| F01_cb7328_c5/f1p0/3547-0F  | RLK-Pelle_LRR-VI-2 | PK |
| F01_cb7328_c5/f1p0/3547-2F  | RLK-Pelle_LRR-VI-2 | PK |
| F01_cb7328_c7/f1p0/2466-0F  | RLK-Pelle_LRR-VI-2 | PK |
| F01_cb7328_c7/f1p0/2466-2F  | RLK-Pelle_LRR-VI-2 | PK |
| F01_cb7328_c9/f2p0/2268-0F  | RLK-Pelle_LRR-VI-2 | PK |
| F01_cb7332_c3/f2p0/2489-2F  | RLK-Pelle_RLCK-V   | PK |
| F01_cb7332_c4/f1p0/2646-0F  | RLK-Pelle_RLCK-V   | PK |
| F01_cb7332_c6/f1p0/2808-2F  | RLK-Pelle_RLCK-V   | PK |
| F01_cb7381_c2/f1p0/2630-1F  | RLK-Pelle_LRR-II   | PK |
| F01_cb7381_c3/f1p0/2562-2F  | RLK-Pelle_LRR-II   | PK |
| F01_cb7381_c4/f1p0/2122-2F  | RLK-Pelle_LRR-II   | PK |
| F01_cb7381_c5/f1p0/2233-1F  | RLK-Pelle_LRR-II   | PK |
| F01_cb7394_c1/f2p0/1619-1F  | RLK-Pelle_RLCK-X   | PK |
| F01_cb7394_c1/f2p0/1619-2F  | RLK-Pelle_RLCK-X   | PK |
| F01_cb7394_c4/f1p0/2441-0F  | RLK-Pelle_RLCK-X   | PK |

---

---

|                              |                    |    |
|------------------------------|--------------------|----|
| F01_cb7394_c6/flp0/1751-2F   | RLK-Pelle_RLCK-X   | PK |
| F01_cb7394_c7/flp0/1507-1F   | RLK-Pelle_RLCK-X   | PK |
| F01_cb7394_c7/flp0/1507-2F   | RLK-Pelle_RLCK-X   | PK |
| F01_cb7397_c0/flp0/2627-0F   | RLK-Pelle_CR4L     | PK |
| F01_cb7397_c1/flp0/2180-0F   | RLK-Pelle_CR4L     | PK |
| F01_cb7397_c1/flp0/2180-1F   | RLK-Pelle_CR4L     | PK |
| F01_cb7397_c2/flp0/1887-0F   | RLK-Pelle_CR4L     | PK |
| F01_cb7397_c4/flp0/1787-1F   | RLK-Pelle_CR4L     | PK |
| F01_cb7455_c1/flp0/2475-1F   | RLK-Pelle_LRK10L-2 | PK |
| F01_cb7455_c2/flp0/2955-2F   | RLK-Pelle_LRK10L-2 | PK |
| F01_cb7465_c0/flp2/2428-1F   | CAMK_CDPK          | PK |
| F01_cb7465_c0/flp2/2428-2F   | CAMK_CDPK          | PK |
| F01_cb7465_c11/flp1/2467-2F  | CAMK_CDPK          | PK |
| F01_cb7465_c14/flp0/2565-0F  | CAMK_CDPK          | PK |
| F01_cb7473_c101/flp0/5112-1F | TKL-PI-6           | PK |
| F01_cb7473_c101/flp0/5112-2F | TKL-PI-6           | PK |
| F01_cb7473_c102/flp2/4847-1F | TKL-PI-6           | PK |
| F01_cb7473_c104/flp3/4707-2F | TKL-PI-6           | PK |
| F01_cb7473_c32/flp2/4521-0F  | TKL-PI-6           | PK |
| F01_cb7473_c35/flp1/4531-1F  | TKL-PI-6           | PK |
| F01_cb7473_c39/flp3/4702-2F  | TKL-PI-6           | PK |
| F01_cb7473_c69/flp5/4717-0F  | TKL-PI-6           | PK |
| F01_cb7473_c70/flp2/3838-2F  | TKL-PI-6           | PK |
| F01_cb7473_c73/flp0/4374-1F  | TKL-PI-6           | PK |
| F01_cb7473_c75/flp2/3492-2F  | TKL-PI-6           | PK |
| F01_cb7473_c79/flp2/4350-1F  | TKL-PI-6           | PK |

---

---

|                             |                 |    |
|-----------------------------|-----------------|----|
| F01_cb7473_c79/flp2/4350-2F | TKL-PI-6        | PK |
| F01_cb7473_c81/flp0/4667-0F | TKL-PI-6        | PK |
| F01_cb7473_c82/flp1/4302-0F | TKL-PI-6        | PK |
| F01_cb7473_c85/flp0/2404-1F | TKL-PI-6        | PK |
| F01_cb7473_c88/flp0/4354-1F | TKL-PI-6        | PK |
| F01_cb7473_c94/flp0/5910-0F | TKL-PI-6        | PK |
| F01_cb7473_c97/flp0/5726-2F | TKL-PI-6        | PK |
| F01_cb7473_c98/flp0/5241-1F | TKL-PI-6        | PK |
| F01_cb7519_c1/f3p0/1555-0F  | CAMK_OST1L      | PK |
| F01_cb7519_c10/flp0/1531-1F | CAMK_OST1L      | PK |
| F01_cb7519_c20/f2p0/1611-1F | CAMK_OST1L      | PK |
| F01_cb7519_c8/flp0/1575-1F  | CAMK_OST1L      | PK |
| F01_cb7519_c8/flp0/1575-2F  | CAMK_OST1L      | PK |
| F01_cb7519_c9/flp0/1565-1F  | CAMK_OST1L      | PK |
| F01_cb7544_c0/flp0/2593-1F  | RLK-Pelle_LysM  | PK |
| F01_cb7614_c2/flp0/2572-0F  | RLK-Pelle_L-LEC | PK |
| F01_cb7614_c2/flp0/2572-1F  | RLK-Pelle_L-LEC | PK |
| F01_cb7614_c4/flp0/2346-0F  | RLK-Pelle_L-LEC | PK |
| F01_cb7614_c7/flp0/2088-2F  | RLK-Pelle_L-LEC | PK |
| F01_cb7614_c8/f3p0/2186-1F  | RLK-Pelle_L-LEC | PK |
| F01_cb7614_c9/flp0/2099-0F  | RLK-Pelle_L-LEC | PK |
| F01_cb7623_c10/flp1/3196-1F | CAMK_CDPK       | PK |
| F01_cb7623_c10/flp1/3196-2F | CAMK_CDPK       | PK |
| F01_cb7623_c11/flp1/2298-0F | CAMK_CDPK       | PK |
| F01_cb7623_c11/flp1/2298-1F | CAMK_CDPK       | PK |
| F01_cb7623_c13/flp0/2310-0F | CAMK_CDPK       | PK |

---



---

|                             |                       |    |
|-----------------------------|-----------------------|----|
| F01_cb7623_c14/flp0/2422-0F | CAMK_CDPK             | PK |
| F01_cb7623_c16/flp0/2535-0F | CAMK_CDPK             | PK |
| F01_cb7623_c16/flp0/2535-2F | CAMK_CDPK             | PK |
| F01_cb7623_c23/flp0/2362-0F | CAMK_CDPK             | PK |
| F01_cb7623_c23/flp0/2362-2F | CAMK_CDPK             | PK |
| F01_cb7623_c25/flp0/2346-0F | CAMK_CDPK             | PK |
| F01_cb7623_c27/flp0/2082-1F | CAMK_CDPK             | PK |
| F01_cb7623_c28/flp1/2038-0F | CAMK_CDPK             | PK |
| F01_cb7623_c34/f2p0/2410-1F | CAMK_CDPK             | PK |
| F01_cb7623_c34/f2p0/2410-2F | CAMK_CDPK             | PK |
| F01_cb7623_c8/flp0/2569-1F  | CAMK_CDPK             | PK |
| F01_cb7636_c1/flp1/2570-1F  | TKL-PI-4              | PK |
| F01_cb7636_c2/flp0/2241-2F  | TKL-PI-4              | PK |
| F01_cb7636_c3/flp0/2438-2F  | TKL-PI-4              | PK |
| F01_cb7636_c5/flp0/1712-0F  | TKL-PI-4              | PK |
| F01_cb7640_c0/flp0/2570-1F  | RLK-Pelle_DLSV        | PK |
| F01_cb7681_c0/f2p0/2467-0F  | RLK-Pelle_DLSV        | PK |
| F01_cb7681_c1/flp0/2561-1F  | RLK-Pelle_DLSV        | PK |
| F01_cb7690_c0/flp0/2559-0F  | RLK-Pelle_LRR-III     | PK |
| F01_cb7690_c0/flp0/2559-2F  | RLK-Pelle_LRR-III     | PK |
| F01_cb7690_c1/flp0/2545-1F  | RLK-Pelle_LRR-III     | PK |
| F01_cb7690_c1/flp0/2545-2F  | RLK-Pelle_LRR-III     | PK |
| F01_cb7718_c0/flp0/2575-1F  | RLK-Pelle_SD-2b       | PK |
| F01_cb7718_c4/flp0/2261-0F  | RLK-Pelle_SD-2b       | PK |
| F01_cb7718_c4/flp0/2261-1F  | RLK-Pelle_SD-2b       | PK |
| F01_cb7719_c0/f3p0/2334-2F  | RLK-Pelle_RLCK-VIIa-2 | PK |

---

---

|                             |                       |    |
|-----------------------------|-----------------------|----|
| F01_cb7719_c3/f1p0/2551-1F  | RLK-Pelle_RLCK-VIIa-2 | PK |
| F01_cb7719_c4/f1p0/2330-0F  | RLK-Pelle_RLCK-VIIa-2 | PK |
| F01_cb7719_c5/f1p0/2379-0F  | RLK-Pelle_RLCK-VIIa-2 | PK |
| F01_cb7719_c6/f1p0/5135-1F  | RLK-Pelle_RLCK-VIIa-2 | PK |
| F01_cb7719_c6/f1p0/5135-2F  | RLK-Pelle_RLCK-VIIa-2 | PK |
| F01_cb7748_c0/f3p0/2463-2F  | RLK-Pelle_LRR-XI-2    | PK |
| F01_cb7748_c1/f3p0/2333-1F  | RLK-Pelle_LRR-XI-2    | PK |
| F01_cb7748_c2/f2p0/2406-0F  | RLK-Pelle_LRR-XI-2    | PK |
| F01_cb7748_c2/f2p0/2406-1F  | RLK-Pelle_LRR-XI-2    | PK |
| F01_cb7748_c4/f1p0/4792-2F  | RLK-Pelle_LRR-XI-2    | PK |
| F01_cb7770_c1/f1p0/2271-0F  | NEK                   | PK |
| F01_cb7812_c0/f1p0/2576-1F  | RLK-Pelle_SD-2b       | PK |
| F01_cb7812_c11/f1p0/2558-2F | RLK-Pelle_SD-2b       | PK |
| F01_cb7812_c12/f1p0/2425-1F | RLK-Pelle_SD-2b       | PK |
| F01_cb7812_c3/f2p0/2427-0F  | RLK-Pelle_SD-2b       | PK |
| F01_cb7812_c3/f2p0/2427-1F  | RLK-Pelle_SD-2b       | PK |
| F01_cb7812_c9/f1p0/2503-1F  | RLK-Pelle_SD-2b       | PK |
| F01_cb7815_c1/f8p1/2084-0F  | AGC_NDR               | PK |
| F01_cb7815_c11/f1p1/2093-1F | AGC_NDR               | PK |
| F01_cb7815_c11/f1p1/2093-2F | AGC_NDR               | PK |
| F01_cb7815_c12/f1p0/3859-1F | AGC_NDR               | PK |
| F01_cb7815_c15/f1p1/2179-0F | AGC_NDR               | PK |
| F01_cb7815_c5/f1p0/2383-1F  | AGC_NDR               | PK |
| F01_cb7815_c7/f1p0/3828-0F  | AGC_NDR               | PK |
| F01_cb7815_c8/f1p0/3813-1F  | AGC_NDR               | PK |
| F01_cb7833_c0/f1p1/2523-0F  | RLK-Pelle_RLCK-VI     | PK |

---

---

|                             |                       |    |
|-----------------------------|-----------------------|----|
| F01_cb7833_c4/flp1/2093-0F  | RLK-Pelle_RLCK-VI     | PK |
| F01_cb7833_c5/flp0/2433-1F  | RLK-Pelle_RLCK-VI     | PK |
| F01_cb7833_c7/flp0/1964-0F  | RLK-Pelle_RLCK-VI     | PK |
| F01_cb7833_c7/flp0/1964-2F  | RLK-Pelle_RLCK-VI     | PK |
| F01_cb7833_c9/flp0/1865-2F  | RLK-Pelle_RLCK-VI     | PK |
| F01_cb7857_c13/flp0/2356-0F | RLK-Pelle_LRR-Xa      | PK |
| F01_cb7857_c14/flp1/2180-0F | RLK-Pelle_LRR-Xa      | PK |
| F01_cb7857_c16/flp0/2520-1F | RLK-Pelle_LRR-Xa      | PK |
| F01_cb7857_c17/flp1/2293-2F | RLK-Pelle_LRR-Xa      | PK |
| F01_cb7857_c18/flp0/2248-1F | RLK-Pelle_LRR-Xa      | PK |
| F01_cb7857_c22/flp1/2443-1F | RLK-Pelle_LRR-Xa      | PK |
| F01_cb7857_c23/flp1/2477-0F | RLK-Pelle_LRR-Xa      | PK |
| F01_cb7857_c33/flp1/2317-2F | RLK-Pelle_LRR-Xa      | PK |
| F01_cb7857_c35/flp2/2269-1F | RLK-Pelle_LRR-Xa      | PK |
| F01_cb7857_c8/flp0/2518-2F  | RLK-Pelle_LRR-Xa      | PK |
| F01_cb7857_c9/flp0/2620-1F  | RLK-Pelle_LRR-Xa      | PK |
| F01_cb7877_c4/flp0/1633-1F  | Aur                   | PK |
| F01_cb7877_c5/flp0/1554-0F  | Aur                   | PK |
| F01_cb7880_c0/flp0/2513-1F  | RLK-Pelle_RLCK-IXa    | PK |
| F01_cb7880_c0/flp0/2513-2F  | RLK-Pelle_RLCK-IXa    | PK |
| F01_cb7880_c1/flp0/2383-1F  | RLK-Pelle_RLCK-IXa    | PK |
| F01_cb7880_c2/flp0/2386-0F  | RLK-Pelle_RLCK-IXa    | PK |
| F01_cb7880_c2/flp0/2386-2F  | RLK-Pelle_RLCK-IXa    | PK |
| F01_cb7880_c3/flp0/2527-2F  | RLK-Pelle_RLCK-IXa    | PK |
| F01_cb7880_c5/flp0/2230-0F  | RLK-Pelle_RLCK-IXa    | PK |
| F01_cb7884_c0/f6p0/2160-1F  | RLK-Pelle_RLCK-VIIa-1 | PK |

---

---

|                             |                       |    |
|-----------------------------|-----------------------|----|
| F01_cb7884_c1/f4p0/2102-0F  | RLK-Pelle_RLCK-VIIa-1 | PK |
| F01_cb7884_c10/f1p0/2173-0F | RLK-Pelle_RLCK-VIIa-1 | PK |
| F01_cb7884_c13/f1p0/2131-0F | RLK-Pelle_RLCK-VIIa-1 | PK |
| F01_cb7884_c14/f1p0/1994-0F | RLK-Pelle_RLCK-VIIa-1 | PK |
| F01_cb7884_c19/f1p0/1680-1F | RLK-Pelle_RLCK-VIIa-1 | PK |
| F01_cb7884_c20/f1p0/1563-1F | RLK-Pelle_RLCK-VIIa-1 | PK |
| F01_cb7884_c4/f1p0/2511-0F  | RLK-Pelle_RLCK-VIIa-1 | PK |
| F01_cb7884_c5/f1p0/2380-2F  | RLK-Pelle_RLCK-VIIa-1 | PK |
| F01_cb7884_c8/f1p0/2095-2F  | RLK-Pelle_RLCK-VIIa-1 | PK |
| F01_cb7884_c9/f1p0/2372-0F  | RLK-Pelle_RLCK-VIIa-1 | PK |
| F01_cb7887_c0/f1p0/2522-1F  | RLK-Pelle_PERK-1      | PK |
| F01_cb7887_c0/f1p0/2522-2F  | RLK-Pelle_PERK-1      | PK |
| F01_cb7887_c3/f1p0/1941-1F  | RLK-Pelle_PERK-1      | PK |
| F01_cb792_c1/f1p1/3799-0F   | AGC_RSK-2             | PK |
| F01_cb792_c1/f1p1/3799-1F   | AGC_RSK-2             | PK |
| F01_cb792_c11/f1p0/4630-1F  | AGC_RSK-2             | PK |
| F01_cb792_c15/f1p0/3428-0F  | AGC_RSK-2             | PK |
| F01_cb792_c15/f1p0/3428-2F  | AGC_RSK-2             | PK |
| F01_cb792_c16/f1p0/3622-1F  | AGC_RSK-2             | PK |
| F01_cb792_c27/f1p3/4257-0F  | AGC_RSK-2             | PK |
| F01_cb792_c27/f1p3/4257-2F  | AGC_RSK-2             | PK |
| F01_cb792_c30/f1p1/3745-1F  | AGC_RSK-2             | PK |
| F01_cb792_c31/f1p0/3278-0F  | AGC_RSK-2             | PK |
| F01_cb792_c31/f1p0/3278-2F  | AGC_RSK-2             | PK |
| F01_cb792_c32/f1p1/4065-2F  | AGC_RSK-2             | PK |
| F01_cb792_c35/f1p1/3973-1F  | AGC_RSK-2             | PK |

---

---

|                             |                     |    |
|-----------------------------|---------------------|----|
| F01_cb792_c38/f1p0/3385-0F  | AGC_RSK-2           | PK |
| F01_cb792_c38/f1p0/3385-1F  | AGC_RSK-2           | PK |
| F01_cb792_c42/f1p0/4087-0F  | AGC_RSK-2           | PK |
| F01_cb792_c44/f1p2/4203-2F  | AGC_RSK-2           | PK |
| F01_cb792_c47/f1p0/3981-0F  | AGC_RSK-2           | PK |
| F01_cb792_c48/f1p0/2773-1F  | AGC_RSK-2           | PK |
| F01_cb792_c5/f1p3/3973-2F   | AGC_RSK-2           | PK |
| F01_cb792_c53/f1p0/3930-2F  | AGC_RSK-2           | PK |
| F01_cb792_c8/f3p0/3700-1F   | AGC_RSK-2           | PK |
| F01_cb792_c9/f3p0/3428-2F   | AGC_RSK-2           | PK |
| F01_cb7938_c0/f1p0/2496-0F  | RLK-Pelle_Extensin  | PK |
| F01_cb7938_c1/f1p0/2905-1F  | RLK-Pelle_Extensin  | PK |
| F01_cb7938_c1/f1p0/2905-2F  | RLK-Pelle_Extensin  | PK |
| F01_cb7938_c2/f1p0/1721-0F  | RLK-Pelle_Extensin  | PK |
| F01_cb7938_c2/f1p0/1721-2F  | RLK-Pelle_Extensin  | PK |
| F01_cb793_c2/f1p0/2758-0F   | TKL_Gdt             | PK |
| F01_cb7942_c28/f1p0/5231-0F | STE_STE11           | PK |
| F01_cb7956_c0/f1p0/2494-2F  | RLK-Pelle_LRR-II    | PK |
| F01_cb7956_c1/f1p1/2308-0F  | RLK-Pelle_LRR-II    | PK |
| F01_cb7956_c2/f1p1/2417-0F  | RLK-Pelle_LRR-II    | PK |
| F01_cb7956_c4/f1p0/1716-2F  | RLK-Pelle_LRR-II    | PK |
| F01_cb7958_c1/f1p0/2525-0F  | RLK-Pelle_LRR-VII-2 | PK |
| F01_cb7958_c2/f1p0/2402-0F  | RLK-Pelle_LRR-VII-2 | PK |
| F01_cb7958_c3/f1p0/2396-2F  | RLK-Pelle_LRR-VII-2 | PK |
| F01_cb7959_c0/f3p1/2489-1F  | RLK-Pelle_LRR-III   | PK |
| F01_cb7986_c10/f1p0/2589-0F | CK1_CK1             | PK |

---

---

|                              |                    |    |
|------------------------------|--------------------|----|
| F01_cb7986_c11/flp0/2013-1F  | CK1_CK1            | PK |
| F01_cb7986_c12/flp0/2135-0F  | CK1_CK1            | PK |
| F01_cb7986_c14/flp0/2289-0F  | CK1_CK1            | PK |
| F01_cb7986_c20/flp0/2471-2F  | CK1_CK1            | PK |
| F01_cb7986_c25/flp0/2385-1F  | CK1_CK1            | PK |
| F01_cb7986_c27/flp2/2043-0F  | CK1_CK1            | PK |
| F01_cb7986_c28/flp1/2038-1F  | CK1_CK1            | PK |
| F01_cb7986_c29/flp0/2406-2F  | CK1_CK1            | PK |
| F01_cb7986_c30/flp0/2096-2F  | CK1_CK1            | PK |
| F01_cb7986_c32/flp0/2203-1F  | CK1_CK1            | PK |
| F01_cb7986_c33/flp0/2206-1F  | CK1_CK1            | PK |
| F01_cb7986_c34/flp2/2046-0F  | CK1_CK1            | PK |
| F01_cb7986_c38/flp0/2277-1F  | CK1_CK1            | PK |
| F01_cb7986_c39/flp0/2138-1F  | CK1_CK1            | PK |
| F01_cb7986_c42/flp0/2132-1F  | CK1_CK1            | PK |
| F01_cb7986_c43/flp0/1870-2F  | CK1_CK1            | PK |
| F01_cb7986_c46/flp0/1612-0F  | CK1_CK1            | PK |
| F01_cb7986_c50/fl3p0/2156-0F | CK1_CK1            | PK |
| F01_cb7986_c8/flp0/2489-0F   | CK1_CK1            | PK |
| F01_cb7986_c9/flp0/2279-1F   | CK1_CK1            | PK |
| F01_cb804_c11/flp0/3984-0F   | RLK-Pelle_Extensin | PK |
| F01_cb804_c12/flp0/3580-1F   | RLK-Pelle_Extensin | PK |
| F01_cb804_c3/flp2/3980-1F    | RLK-Pelle_Extensin | PK |
| F01_cb804_c4/flp0/4404-1F    | RLK-Pelle_Extensin | PK |
| F01_cb804_c4/flp0/4404-2F    | RLK-Pelle_Extensin | PK |
| F01_cb804_c7/flp0/3407-0F    | RLK-Pelle_Extensin | PK |

---

---

|                             |                     |    |
|-----------------------------|---------------------|----|
| F01_cb804_c9/flp2/3622-2F   | RLK-Pelle_Extensin  | PK |
| F01_cb8052_c0/f2p0/1908-0F  | RLK-Pelle_RLCK-IV   | PK |
| F01_cb8052_c1/flp0/2472-0F  | RLK-Pelle_RLCK-IV   | PK |
| F01_cb8052_c1/flp0/2472-2F  | RLK-Pelle_RLCK-IV   | PK |
| F01_cb8052_c2/flp0/2271-2F  | RLK-Pelle_RLCK-IV   | PK |
| F01_cb808_c5/flp0/2943-0F   | RLK-Pelle_LRR-I-2   | PK |
| F01_cb808_c5/flp0/2943-1F   | RLK-Pelle_LRR-I-2   | PK |
| F01_cb8219_c10/flp1/2990-2F | RLK-Pelle_LRR-II    | PK |
| F01_cb8219_c12/flp1/2448-2F | RLK-Pelle_LRR-II    | PK |
| F01_cb8219_c13/flp0/2684-2F | RLK-Pelle_LRR-II    | PK |
| F01_cb8219_c15/flp2/2313-1F | RLK-Pelle_LRR-II    | PK |
| F01_cb8219_c21/flp0/2209-2F | RLK-Pelle_LRR-II    | PK |
| F01_cb8219_c23/flp0/2536-0F | RLK-Pelle_LRR-II    | PK |
| F01_cb8219_c23/flp0/2536-1F | RLK-Pelle_LRR-II    | PK |
| F01_cb8219_c24/flp0/2245-0F | RLK-Pelle_LRR-II    | PK |
| F01_cb8219_c7/flp0/2426-1F  | RLK-Pelle_LRR-II    | PK |
| F01_cb8219_c8/flp0/2332-2F  | RLK-Pelle_LRR-II    | PK |
| F01_cb8219_c9/flp0/2465-1F  | RLK-Pelle_LRR-II    | PK |
| F01_cb8232_c0/flp0/2423-2R  | RLK-Pelle_CrRLK1L-1 | PK |
| F01_cb8232_c1/flp1/2570-1R  | RLK-Pelle_CrRLK1L-1 | PK |
| F01_cb8232_c2/flp0/1283-2R  | RLK-Pelle_CrRLK1L-1 | PK |
| F01_cb8243_c11/flp0/2473-1F | CAMK_CAMKL-CHK1     | PK |
| F01_cb8243_c13/flp0/1996-1F | CAMK_CAMKL-CHK1     | PK |
| F01_cb8243_c13/flp0/1996-2F | CAMK_CAMKL-CHK1     | PK |
| F01_cb8243_c2/f3p0/2267-2F  | CAMK_CAMKL-CHK1     | PK |
| F01_cb8243_c23/flp0/2340-1F | CAMK_CAMKL-CHK1     | PK |

---

---

|                             |                      |    |
|-----------------------------|----------------------|----|
| F01_cb8243_c8/f1p1/2514-0F  | CAMK_CAMKL-CHK1      | PK |
| F01_cb8243_c8/f1p1/2514-1F  | CAMK_CAMKL-CHK1      | PK |
| F01_cb8243_c9/f1p1/2375-1F  | CAMK_CAMKL-CHK1      | PK |
| F01_cb8243_c9/f1p1/2375-2F  | CAMK_CAMKL-CHK1      | PK |
| F01_cb8261_c0/f1p0/2416-0F  | RLK-Pelle_L-LEC      | PK |
| F01_cb8261_c0/f1p0/2416-2F  | RLK-Pelle_L-LEC      | PK |
| F01_cb8261_c1/f1p0/2427-0F  | RLK-Pelle_L-LEC      | PK |
| F01_cb8282_c0/f1p0/2410-0F  | RLK-Pelle_L-LEC      | PK |
| F01_cb8282_c1/f1p0/2267-1F  | RLK-Pelle_L-LEC      | PK |
| F01_cb8304_c0/f1p0/2405-0F  | RLK-Pelle_RLCK-XI    | PK |
| F01_cb8313_c10/f1p2/1641-1F | RLK-Pelle_L-LEC      | PK |
| F01_cb8313_c2/f2p2/1637-0F  | RLK-Pelle_L-LEC      | PK |
| F01_cb8313_c3/f2p4/1747-0F  | RLK-Pelle_L-LEC      | PK |
| F01_cb8313_c4/f2p0/1668-2F  | RLK-Pelle_L-LEC      | PK |
| F01_cb8313_c5/f1p0/2403-0F  | RLK-Pelle_L-LEC      | PK |
| F01_cb8313_c7/f1p0/1924-0F  | RLK-Pelle_L-LEC      | PK |
| F01_cb8313_c8/f1p0/1620-2F  | RLK-Pelle_L-LEC      | PK |
| F01_cb8313_c9/f1p0/1605-0F  | RLK-Pelle_WAK        | PK |
| F01_cb8316_c1/f1p0/2402-0F  | CAMK_CDPK            | PK |
| F01_cb8316_c5/f4p0/2159-1F  | CAMK_CDPK            | PK |
| F01_cb8326_c1/f1p0/3568-2F  | RLK-Pelle_DLSV       | PK |
| F01_cb8353_c0/f1p0/2372-2F  | RLK-Pelle_DLSV       | PK |
| F01_cb8353_c2/f1p0/1626-0F  | RLK-Pelle_DLSV       | PK |
| F01_cb8353_c3/f1p0/1612-1F  | RLK-Pelle_DLSV       | PK |
| F01_cb8362_c7/f1p0/2209-1F  | RLK-Pelle_LRR-XI-2   | PK |
| F01_cb8370_c3/f1p0/2389-0F  | RLK-Pelle_RLCK-XII-1 | PK |

---



---

|                             |                      |    |
|-----------------------------|----------------------|----|
| F01_cb8415_c11/flp0/2377-1F | TKL-PI-3             | PK |
| F01_cb8415_c12/f3p1/2518-0F | TKL-PI-3             | PK |
| F01_cb8415_c4/flp0/3003-2F  | TKL-PI-3             | PK |
| F01_cb8415_c5/flp0/2267-0F  | TKL-PI-3             | PK |
| F01_cb8415_c5/flp0/2267-1F  | TKL-PI-3             | PK |
| F01_cb8415_c8/flp0/2154-0F  | TKL-PI-3             | PK |
| F01_cb8415_c9/flp0/2373-1F  | TKL-PI-3             | PK |
| F01_cb8430_c12/flp0/2260-1F | CMGC_CDK-CRK7-CDK9   | PK |
| F01_cb8430_c13/flp0/2161-1F | CMGC_CDK-CRK7-CDK9   | PK |
| F01_cb8430_c13/flp0/2161-2F | CMGC_CDK-CRK7-CDK9   | PK |
| F01_cb8430_c19/f6p0/2064-2F | CMGC_CDK-CRK7-CDK9   | PK |
| F01_cb8430_c9/flp0/2284-2F  | CMGC_CDK-CRK7-CDK9   | PK |
| F01_cb8435_c0/flp0/2370-0F  | RLK-Pelle_LRR-I-2    | PK |
| F01_cb8435_c1/flp0/1902-2F  | RLK-Pelle_LRR-I-2    | PK |
| F01_cb8435_c2/flp0/1682-1F  | RLK-Pelle_LRR-I-2    | PK |
| F01_cb8435_c2/flp0/1682-2F  | RLK-Pelle_LRR-I-2    | PK |
| F01_cb847_c0/flp0/4607-0F   | RLK-Pelle_LRR-VIII-1 | PK |
| F01_cb847_c1/flp0/2020-2F   | RLK-Pelle_LRR-VIII-1 | PK |
| F01_cb847_c3/flp0/3395-2F   | RLK-Pelle_LRR-VIII-1 | PK |
| F01_cb8498_c0/flp0/2351-0F  | RLK-Pelle_L-LEC      | PK |
| F01_cb8498_c2/flp0/2306-2F  | RLK-Pelle_L-LEC      | PK |
| F01_cb8518_c0/f5p1/2336-0F  | RLK-Pelle_LRR-III    | PK |
| F01_cb8547_c1/f2p0/2162-1F  | TKL-PI-4             | PK |
| F01_cb8547_c1/f2p0/2162-2F  | TKL-PI-4             | PK |
| F01_cb8547_c14/f3p0/2216-0F | TKL-PI-4             | PK |
| F01_cb8547_c15/flp0/2174-0F | TKL-PI-4             | PK |

---

---

|                                  |                      |    |
|----------------------------------|----------------------|----|
| F01_cb8547_c15/f1p0/2174-1F      | TKL-PI-4             | PK |
| F01_cb8547_c2/f1p0/2338-0F       | TKL-PI-4             | PK |
| F01_cb8547_c3/f1p0/2081-2F       | TKL-PI-4             | PK |
| F01_cb8547_c4/f1p0/2164-1F       | TKL-PI-4             | PK |
| F01_cb8547_c6/f1p0/2234-1F       | TKL-PI-4             | PK |
| F01_cb8547_c6/f1p0/2234-2F       | TKL-PI-4             | PK |
| F01_cb8547_c7/f1p0/2217-2F       | TKL-PI-4             | PK |
| F01_cb8547_c8/f1p0/2636-2F       | TKL-PI-4             | PK |
| F01_cb8547_c9/f1p0/2136-2F       | TKL-PI-4             | PK |
| F01_cb8564_c10047/f3p1/3273-0F   | CMGC_CDK-PITSLRE     | PK |
| F01_cb8564_c10328/f1p1/3525-2F   | CMGC_CDK-PITSLRE     | PK |
| F01_cb8564_c10425/f1p0/4814-0F   | CMGC_MAPK            | PK |
| F01_cb8564_c10461/f1p0/1967-0F   | AGC-PI               | PK |
| F01_cb8564_c10461/f1p0/1967-1F   | AGC-PI               | PK |
| F01_cb8564_c104640/f4p5/2313-2F  | RLK-Pelle_LysM       | PK |
| F01_cb8564_c10551/f1p0/2536-0F   | RLK-Pelle_DLSV       | PK |
| F01_cb8564_c105673/f1p1/2557-2F  | RLK-Pelle_LysM       | PK |
| F01_cb8564_c106799/f2p0/3168-0F  | RLK-Pelle_LRR-IX     | PK |
| F01_cb8564_c106809/f12p4/3320-1F | RLK-Pelle_LRR-VIII-1 | PK |
| F01_cb8564_c106830/f3p0/3099-0F  | RLK-Pelle_CrRLK1L-1  | PK |
| F01_cb8564_c106830/f3p0/3099-1F  | RLK-Pelle_CrRLK1L-1  | PK |
| F01_cb8564_c106956/f4p6/2390-2F  | RLK-Pelle_DLSV       | PK |
| F01_cb8564_c107010/f7p2/3198-1F  | RLK-Pelle_DLSV       | PK |
| F01_cb8564_c107325/f11p0/2469-2F | RLK-Pelle_DLSV       | PK |
| F01_cb8564_c107607/f7p0/2484-1F  | RLK-Pelle_LRR-II     | PK |
| F01_cb8564_c107625/f7p0/2800-1F  | RLK-Pelle_LRR-II     | PK |

---

---

|                                 |                        |    |
|---------------------------------|------------------------|----|
| F01_cb8564_c107650/f6p0/2145-2F | RLK-Pelle_LysM         | PK |
| F01_cb8564_c107702/f7p2/2922-1F | RLK-Pelle_RLCK-VI      | PK |
| F01_cb8564_c107754/f5p0/3585-0F | RLK-Pelle_LRR-XIIIb    | PK |
| F01_cb8564_c107794/f3p2/1953-1F | CAMK_CAMKL-CBK1        | PK |
| F01_cb8564_c107859/f5p0/2352-1F | RLK-Pelle_LRR-II       | PK |
| F01_cb8564_c10786/f1p0/2509-1F  | CMGC_MAPK              | PK |
| F01_cb8564_c108739/f7p0/2789-2F | CMGC_RCK               | PK |
| F01_cb8564_c108806/f9p0/2182-1F | RLK-Pelle_LysM         | PK |
| F01_cb8564_c108809/f8p2/2590-2F | RLK-Pelle_WAK_LRK10L-1 | PK |
| F01_cb8564_c109293/f3p0/2904-0F | CMGC_RCK               | PK |
| F01_cb8564_c109436/f3p0/3336-2F | RLK-Pelle_RLCK-IXb     | PK |
| F01_cb8564_c109567/f3p0/2271-2F | RLK-Pelle_LysM         | PK |
| F01_cb8564_c109614/f3p0/3516-0F | STE_STE11              | PK |
| F01_cb8564_c109614/f3p0/3516-1F | STE_STE11              | PK |
| F01_cb8564_c109636/f4p0/2195-1F | RLK-Pelle_PERK-1       | PK |
| F01_cb8564_c109730/f3p0/2853-1F | RLK-Pelle_DLSV         | PK |
| F01_cb8564_c109763/f6p0/2213-0F | RLK-Pelle_LRK10L-2     | PK |
| F01_cb8564_c109805/f2p0/2993-2F | RLK-Pelle_RLCK-IXb     | PK |
| F01_cb8564_c109935/f2p1/2100-2F | RLK-Pelle_RLCK-VIIa-2  | PK |
| F01_cb8564_c109983/f2p0/2051-0F | RLK-Pelle_RLCK-IXb     | PK |
| F01_cb8564_c110001/f2p0/2066-0F | RLK-Pelle_RLCK-VIIa-2  | PK |
| F01_cb8564_c110030/f3p0/2151-1F | CAMK_AMPK              | PK |
| F01_cb8564_c110031/f4p0/2010-0F | CAMK_CAMKL-CBK1        | PK |
| F01_cb8564_c110039/f2p0/4075-2R | RLK-Pelle_LRR-XI-2     | PK |
| F01_cb8564_c110170/f1p0/2703-0F | CMGC_RCK               | PK |
| F01_cb8564_c110170/f1p0/2703-2F | CMGC_RCK               | PK |

---

---

|                                 |                        |    |
|---------------------------------|------------------------|----|
| F01_cb8564_c110249/f1p5/2441-2F | RLK-Pelle_L-LEC        | PK |
| F01_cb8564_c110331/f1p0/2891-0F | CMGC_RCK               | PK |
| F01_cb8564_c110331/f1p0/2891-1F | CMGC_RCK               | PK |
| F01_cb8564_c110354/f1p0/2697-0F | RLK-Pelle_RLCK-IXb     | PK |
| F01_cb8564_c110369/f2p2/3432-0F | TKL_CTR1-DRK-1         | PK |
| F01_cb8564_c110469/f1p0/2627-2F | CMGC_RCK               | PK |
| F01_cb8564_c110511/f1p0/3279-0F | TKL_CTR1-DRK-1         | PK |
| F01_cb8564_c110511/f1p0/3279-2F | TKL_CTR1-DRK-1         | PK |
| F01_cb8564_c110657/f1p0/3023-0F | CMGC_RCK               | PK |
| F01_cb8564_c110700/f1p0/3062-1F | RLK-Pelle_PERK-1       | PK |
| F01_cb8564_c110700/f1p0/3062-2F | RLK-Pelle_PERK-1       | PK |
| F01_cb8564_c110704/f1p0/3841-0F | STE_STE11              | PK |
| F01_cb8564_c110704/f1p0/3841-1F | STE_STE11              | PK |
| F01_cb8564_c110760/f1p0/2242-1F | CAMK_CAMKL-CHK1        | PK |
| F01_cb8564_c110775/f1p1/2362-1F | RLK-Pelle_L-LEC        | PK |
| F01_cb8564_c110799/f1p1/2389-2F | RLK-Pelle_WAK_LRK10L-1 | PK |
| F01_cb8564_c110818/f1p0/2549-2F | CK1_CK1                | PK |
| F01_cb8564_c110872/f1p0/4089-1F | RLK-Pelle_PERK-1       | PK |
| F01_cb8564_c110897/f1p0/3122-1F | RLK-Pelle_RLCK-IXb     | PK |
| F01_cb8564_c110953/f1p0/2771-0F | CMGC_RCK               | PK |
| F01_cb8564_c110953/f1p0/2771-1F | CMGC_RCK               | PK |
| F01_cb8564_c110954/f1p1/2392-0F | CMGC_RCK               | PK |
| F01_cb8564_c110954/f1p1/2392-1F | CMGC_RCK               | PK |
| F01_cb8564_c111220/f1p0/2588-1F | AGC_RSK-2              | PK |
| F01_cb8564_c111240/f1p1/3895-1F | STE_STE11              | PK |
| F01_cb8564_c111257/f1p0/2726-2F | RLK-Pelle_WAK_LRK10L-1 | PK |

---

---

|                                 |                    |    |
|---------------------------------|--------------------|----|
| F01_cb8564_c111279/f1p0/2793-1F | RLK-Pelle_RLCK-IXb | PK |
| F01_cb8564_c111279/f1p0/2793-2F | RLK-Pelle_RLCK-IXb | PK |
| F01_cb8564_c111300/f1p1/2327-2F | RLK-Pelle_LRR-II   | PK |
| F01_cb8564_c111346/f1p0/2978-0F | CMGC_RCK           | PK |
| F01_cb8564_c111363/f1p0/2737-0F | CMGC_RCK           | PK |
| F01_cb8564_c111363/f1p0/2737-1F | CMGC_RCK           | PK |
| F01_cb8564_c111370/f1p0/2892-1F | RLK-Pelle_PERK-1   | PK |
| F01_cb8564_c111370/f1p0/2892-2F | RLK-Pelle_PERK-1   | PK |
| F01_cb8564_c111419/f2p1/2850-1F | CAMK_CDPK          | PK |
| F01_cb8564_c111566/f1p0/2381-1F | TKL-PI-4           | PK |
| F01_cb8564_c111597/f1p0/3403-1F | RLK-Pelle_RLCK-IXb | PK |
| F01_cb8564_c111765/f1p0/2336-0F | RLK-Pelle_DLSV     | PK |
| F01_cb8564_c11204/f1p1/2554-1F  | CMGC_MAPK          | PK |
| F01_cb8564_c112044/f1p4/2411-2F | RLK-Pelle_DLSV     | PK |
| F01_cb8564_c112175/f2p0/2623-1F | CMGC_RCK           | PK |
| F01_cb8564_c112175/f2p0/2623-2F | CMGC_RCK           | PK |
| F01_cb8564_c112185/f1p1/2186-0F | RLK-Pelle_PERK-1   | PK |
| F01_cb8564_c112185/f1p1/2186-2F | RLK-Pelle_PERK-1   | PK |
| F01_cb8564_c112214/f1p0/2132-1F | RLK-Pelle_DLSV     | PK |
| F01_cb8564_c112253/f1p0/2816-2F | CMGC_RCK           | PK |
| F01_cb8564_c112272/f1p0/3791-2F | STE_STE11          | PK |
| F01_cb8564_c11237/f1p0/3521-2F  | RLK-Pelle_DLSV     | PK |
| F01_cb8564_c112401/f1p0/2533-2F | RLK-Pelle_LRK10L-2 | PK |
| F01_cb8564_c112503/f1p0/2983-0F | TKL_CTR1-DRK-1     | PK |
| F01_cb8564_c112503/f1p0/2983-2F | TKL_CTR1-DRK-1     | PK |
| F01_cb8564_c11255/f1p0/2899-2F  | RLK-Pelle_LRR-I-1  | PK |

---

---

|                                 |                        |    |
|---------------------------------|------------------------|----|
| F01_cb8564_c112660/f1p0/2777-1F | STE_STE11              | PK |
| F01_cb8564_c112735/f1p0/2180-0R | RLK-Pelle_RLCK-XII-1   | PK |
| F01_cb8564_c11283/f1p0/3248-0F  | RLK-Pelle_LRR-I-1      | PK |
| F01_cb8564_c11283/f1p0/3248-2F  | RLK-Pelle_LRR-I-1      | PK |
| F01_cb8564_c112951/f1p1/2676-1F | STE_STE11              | PK |
| F01_cb8564_c112951/f1p1/2676-2F | STE_STE11              | PK |
| F01_cb8564_c113014/f1p0/2963-0F | CMGC_RCK               | PK |
| F01_cb8564_c113014/f1p0/2963-1F | CMGC_RCK               | PK |
| F01_cb8564_c113063/f1p0/2238-0F | AGC-PI                 | PK |
| F01_cb8564_c113063/f1p0/2238-1F | AGC-PI                 | PK |
| F01_cb8564_c113082/f1p0/2984-1F | RLK-Pelle_RLCK-IXb     | PK |
| F01_cb8564_c113090/f2p1/2586-2F | RLK-Pelle_WAK_LRK10L-1 | PK |
| F01_cb8564_c113205/f1p0/3318-1F | RLK-Pelle_RLCK-VIIa-2  | PK |
| F01_cb8564_c11335/f2p0/2147-2F  | AGC-PI                 | PK |
| F01_cb8564_c113378/f2p3/2387-0F | RLK-Pelle_L-LEC        | PK |
| F01_cb8564_c113391/f1p0/2206-1F | CAMK_CAMKL-CBK1        | PK |
| F01_cb8564_c113442/f1p1/4271-1F | RLK-Pelle_RLCK-IXb     | PK |
| F01_cb8564_c113452/f1p0/2024-1F | RLK-Pelle_LRK10L-2     | PK |
| F01_cb8564_c113536/f4p0/2375-1F | CAMK_CAMKL-CBK1        | PK |
| F01_cb8564_c113585/f1p0/1949-0F | CAMK_CAMKL-CBK1        | PK |
| F01_cb8564_c113585/f1p0/1949-1F | CAMK_CAMKL-CBK1        | PK |
| F01_cb8564_c113585/f1p0/1949-2F | CAMK_CAMKL-CBK1        | PK |
| F01_cb8564_c113599/f1p0/2144-0F | CMGC_SRPK              | PK |
| F01_cb8564_c113824/f1p0/2966-0F | CMGC_RCK               | PK |
| F01_cb8564_c113878/f1p0/2151-2F | RLK-Pelle_RLCK-XII-1   | PK |
| F01_cb8564_c114061/f1p0/3218-1F | TKL_CTR1-DRK-1         | PK |

---

---

|                                 |                        |    |
|---------------------------------|------------------------|----|
| F01_cb8564_c114061/f1p0/3218-2F | TKL_CTR1-DRK-1         | PK |
| F01_cb8564_c114173/f1p0/2891-1F | RLK-Pelle_DLSV         | PK |
| F01_cb8564_c114181/f1p0/3066-0F | TKL_CTR1-DRK-1         | PK |
| F01_cb8564_c114181/f1p0/3066-2F | TKL_CTR1-DRK-1         | PK |
| F01_cb8564_c114210/f5p0/2641-1F | RLK-Pelle_DLSV         | PK |
| F01_cb8564_c114259/f1p0/2848-0F | RLK-Pelle_WAK_LRK10L-1 | PK |
| F01_cb8564_c114307/f1p0/3739-0F | CMGC_RCK               | PK |
| F01_cb8564_c114383/f1p0/2453-1F | CMGC_RCK               | PK |
| F01_cb8564_c114409/f1p0/2716-1F | STE_STE11              | PK |
| F01_cb8564_c114466/f1p0/3000-0F | CMGC_RCK               | PK |
| F01_cb8564_c114521/f1p0/3515-1F | RLK-Pelle_RLCK-VIIa-2  | PK |
| F01_cb8564_c114592/f1p0/2403-0F | RLK-Pelle_DLSV         | PK |
| F01_cb8564_c114592/f1p0/2403-1F | RLK-Pelle_DLSV         | PK |
| F01_cb8564_c114609/f1p0/3442-1F | STE_STE11              | PK |
| F01_cb8564_c114655/f1p0/2695-2F | RLK-Pelle_RLCK-IXb     | PK |
| F01_cb8564_c114894/f1p0/1910-0F | RLK-Pelle_WAK_LRK10L-1 | PK |
| F01_cb8564_c115113/f1p0/2592-0F | RLK-Pelle_RLCK-IXb     | PK |
| F01_cb8564_c115113/f1p0/2592-2F | RLK-Pelle_RLCK-IXb     | PK |
| F01_cb8564_c115114/f1p0/1959-1F | TKL-PI-4               | PK |
| F01_cb8564_c115114/f1p0/1959-2F | TKL-PI-4               | PK |
| F01_cb8564_c11519/f1p0/2109-0F  | CMGC_CDK-PITSLRE       | PK |
| F01_cb8564_c11519/f1p0/2109-2F  | CMGC_CDK-PITSLRE       | PK |
| F01_cb8564_c115329/f1p0/2622-0F | RLK-Pelle_WAK_LRK10L-1 | PK |
| F01_cb8564_c115399/f2p0/2879-1F | TKL_CTR1-DRK-1         | PK |
| F01_cb8564_c115405/f1p0/3948-0F | TKL_CTR1-DRK-1         | PK |
| F01_cb8564_c115486/f1p1/3203-1F | STE_STE11              | PK |

---

---

|                                 |                       |    |
|---------------------------------|-----------------------|----|
| F01_cb8564_c115557/flp0/2665-1F | CK1_CK1               | PK |
| F01_cb8564_c115642/flp0/3794-1F | RLK-Pelle_RLCK-IXb    | PK |
| F01_cb8564_c115775/flp0/4708-2F | TKL_CTR1-DRK-1        | PK |
| F01_cb8564_c115829/flp0/2856-0F | RLK-Pelle_RLCK-VIIa-2 | PK |
| F01_cb8564_c115829/flp0/2856-1F | RLK-Pelle_RLCK-VIIa-2 | PK |
| F01_cb8564_c115862/flp0/2728-2F | RLK-Pelle_RLCK-XII-1  | PK |
| F01_cb8564_c116001/flp0/3225-1F | RLK-Pelle_RLCK-IXb    | PK |
| F01_cb8564_c116001/flp0/3225-2F | RLK-Pelle_RLCK-IXb    | PK |
| F01_cb8564_c116029/flp0/2889-2F | RLK-Pelle_DLSV        | PK |
| F01_cb8564_c116037/flp0/3379-1F | TKL_CTR1-DRK-1        | PK |
| F01_cb8564_c116112/flp0/2411-2F | RLK-Pelle_LRR-IV      | PK |
| F01_cb8564_c116115/flp0/2124-0F | TKL-PI-4              | PK |
| F01_cb8564_c116144/flp0/3080-1F | RLK-Pelle_DLSV        | PK |
| F01_cb8564_c116249/flp0/2661-0F | CMGC_RCK              | PK |
| F01_cb8564_c116249/flp0/2661-2F | CMGC_RCK              | PK |
| F01_cb8564_c116449/flp0/2445-0F | RLK-Pelle_LRK10L-2    | PK |
| F01_cb8564_c116449/flp0/2445-1F | RLK-Pelle_LRK10L-2    | PK |
| F01_cb8564_c116534/flp1/2348-0F | RLK-Pelle_PERK-1      | PK |
| F01_cb8564_c116534/flp1/2348-1F | RLK-Pelle_PERK-1      | PK |
| F01_cb8564_c116548/flp0/2006-0F | RLK-Pelle_LysM        | PK |
| F01_cb8564_c116603/flp1/2342-2F | RLK-Pelle_PERK-1      | PK |
| F01_cb8564_c116615/flp0/3195-1F | CMGC_RCK              | PK |
| F01_cb8564_c116615/flp0/3195-2F | CMGC_RCK              | PK |
| F01_cb8564_c116627/flp0/2108-2F | RLK-Pelle_RLCK-IXb    | PK |
| F01_cb8564_c116648/flp0/2630-2F | RLK-Pelle_DLSV        | PK |
| F01_cb8564_c116701/flp0/2471-0F | CMGC_RCK              | PK |

---



---

|                                 |                        |    |
|---------------------------------|------------------------|----|
| F01_cb8564_c116701/f1p0/2471-2F | CMGC_RCK               | PK |
| F01_cb8564_c116822/f1p0/2723-2F | RLK-Pelle_DLSV         | PK |
| F01_cb8564_c11697/f1p0/4709-1F  | RLK-Pelle_CrRLK1L-1    | PK |
| F01_cb8564_c116976/f1p0/2943-1F | CMGC_RCK               | PK |
| F01_cb8564_c117060/f1p0/2233-0F | CAMK_CAMKL-CHK1        | PK |
| F01_cb8564_c117126/f2p0/2610-2F | RLK-Pelle_DLSV         | PK |
| F01_cb8564_c11716/f1p1/3711-1F  | RLK-Pelle_LRR-XII-1    | PK |
| F01_cb8564_c117192/f1p0/2991-1F | RLK-Pelle_RLCK-IXb     | PK |
| F01_cb8564_c117256/f1p1/2878-2F | CK1_CK1                | PK |
| F01_cb8564_c117464/f1p0/2604-0F | RLK-Pelle_LRR-II       | PK |
| F01_cb8564_c11759/f1p0/4062-0F  | STE_STE11              | PK |
| F01_cb8564_c117641/f1p0/2859-0F | RLK-Pelle_LRR-Xb-1     | PK |
| F01_cb8564_c117641/f1p0/2859-1F | RLK-Pelle_LysM         | PK |
| F01_cb8564_c117663/f1p0/2828-0F | RLK-Pelle_WAK_LRK10L-1 | PK |
| F01_cb8564_c117774/f1p1/2201-0F | RLK-Pelle_L-LEC        | PK |
| F01_cb8564_c117787/f1p1/4351-2F | TKL-PI-4               | PK |
| F01_cb8564_c117861/f1p0/2243-1F | RLK-Pelle_LRK10L-2     | PK |
| F01_cb8564_c117861/f1p0/2243-2F | RLK-Pelle_LRK10L-2     | PK |
| F01_cb8564_c117889/f1p0/2484-0F | RLK-Pelle_DLSV         | PK |
| F01_cb8564_c118086/f1p0/2187-1F | RLK-Pelle_LysM         | PK |
| F01_cb8564_c118096/f1p0/2820-1F | CMGC_RCK               | PK |
| F01_cb8564_c118096/f1p0/2820-2F | CMGC_RCK               | PK |
| F01_cb8564_c118242/f1p2/3724-2F | STE_STE11              | PK |
| F01_cb8564_c118301/f1p0/2259-0F | RLK-Pelle_RLCK-VI      | PK |
| F01_cb8564_c118313/f1p0/2343-1F | RLK-Pelle_L-LEC        | PK |
| F01_cb8564_c11857/f1p0/3989-2F  | RLK-Pelle_RLCK-VIIa-2  | PK |

---

---

|                                 |                        |    |
|---------------------------------|------------------------|----|
| F01_cb8564_c118597/f1p0/2325-2F | RLK-Pelle_L-LEC        | PK |
| F01_cb8564_c118611/f1p3/2971-1F | RLK-Pelle_CrRLK1L-1    | PK |
| F01_cb8564_c118901/f1p0/3630-1F | NAK                    | PK |
| F01_cb8564_c11895/f2p0/2161-2F  | RLK-Pelle_LRK10L-2     | PK |
| F01_cb8564_c118956/f1p0/2861-2F | TKL_CTR1-DRK-1         | PK |
| F01_cb8564_c11907/f1p0/3937-1F  | RLK-Pelle_LRR-XI-1     | PK |
| F01_cb8564_c119140/f1p0/3034-1F | RLK-Pelle_RLCK-IXb     | PK |
| F01_cb8564_c119266/f1p0/2858-2F | CK1_CK1-PI             | PK |
| F01_cb8564_c119337/f1p0/2896-2R | RLK-Pelle_LRR-XI-2     | PK |
| F01_cb8564_c119410/f1p0/2746-1F | CK1_CK1                | PK |
| F01_cb8564_c119434/f1p0/2937-1F | CMGC_RCK               | PK |
| F01_cb8564_c119646/f1p0/2336-2F | RLK-Pelle_DLSV         | PK |
| F01_cb8564_c11969/f1p1/2914-2F  | RLK-Pelle_SD-2b        | PK |
| F01_cb8564_c119780/f1p0/2632-0F | RLK-Pelle_LysM         | PK |
| F01_cb8564_c119826/f1p0/2124-2F | CMGC_GSK               | PK |
| F01_cb8564_c1199/f1p0/2887-2F   | RLK-Pelle_DLSV         | PK |
| F01_cb8564_c119947/f1p0/2488-1F | RLK-Pelle_WAK_LRK10L-1 | PK |
| F01_cb8564_c119992/f1p1/2694-0F | CMGC_RCK               | PK |
| F01_cb8564_c12002/f1p0/4465-0F  | STE_STE11              | PK |
| F01_cb8564_c120113/f1p0/2030-2F | CAMK_AMPK              | PK |
| F01_cb8564_c120178/f1p0/2851-1F | RLK-Pelle_RLCK-IXb     | PK |
| F01_cb8564_c1203/f1p0/2185-0F   | RLK-Pelle_DLSV         | PK |
| F01_cb8564_c1203/f1p0/2185-1F   | RLK-Pelle_DLSV         | PK |
| F01_cb8564_c1205/f1p0/2486-0F   | RLK-Pelle_DLSV         | PK |
| F01_cb8564_c1206/f1p0/2104-0F   | RLK-Pelle_DLSV         | PK |
| F01_cb8564_c120613/f1p0/2079-0F | RLK-Pelle_RLCK-IXb     | PK |

---

---

|                                 |                     |    |
|---------------------------------|---------------------|----|
| F01_cb8564_c120621/f1p0/2147-1F | RLK-Pelle_PERK-1    | PK |
| F01_cb8564_c120694/f1p0/2801-0F | RLK-Pelle_DLSV      | PK |
| F01_cb8564_c1207/f1p0/2117-0F   | TKL-PI-4            | PK |
| F01_cb8564_c120731/f4p0/3162-2F | RLK-Pelle_LRR-IX    | PK |
| F01_cb8564_c120736/f1p1/3227-0F | TKL_CTR1-DRK-1      | PK |
| F01_cb8564_c120736/f1p1/3227-2F | TKL_CTR1-DRK-1      | PK |
| F01_cb8564_c1208/f1p0/1938-2F   | TKL-PI-4            | PK |
| F01_cb8564_c120913/f1p1/2797-1F | RLK-Pelle_DLSV      | PK |
| F01_cb8564_c120960/f1p0/3590-0F | RLK-Pelle_RLCK-IXb  | PK |
| F01_cb8564_c120960/f1p0/3590-1F | RLK-Pelle_RLCK-IXb  | PK |
| F01_cb8564_c121040/f1p0/3601-0F | STE_STE11           | PK |
| F01_cb8564_c1211/f1p1/4992-2F   | RLK-Pelle_LRR-XI-1  | PK |
| F01_cb8564_c121149/f1p0/3251-0F | CMGC_RCK            | PK |
| F01_cb8564_c1212/f1p0/4151-0F   | RLK-Pelle_LRR-XI-1  | PK |
| F01_cb8564_c1212/f1p0/4151-2F   | RLK-Pelle_LRR-XI-1  | PK |
| F01_cb8564_c121236/f1p4/3795-1F | TKL-PI-4            | PK |
| F01_cb8564_c121315/f1p0/2356-0F | RLK-Pelle_DLSV      | PK |
| F01_cb8564_c1214/f1p0/3091-0F   | RLK-Pelle_LRR-XI-1  | PK |
| F01_cb8564_c121404/f1p6/2450-1F | RLK-Pelle_LysM      | PK |
| F01_cb8564_c121433/f4p1/2731-1F | CMGC_RCK            | PK |
| F01_cb8564_c121448/f1p0/3452-1F | RLK-Pelle_RLCK-IXb  | PK |
| F01_cb8564_c121469/f1p0/2615-0F | CAMK_CDPK           | PK |
| F01_cb8564_c121469/f1p0/2615-2F | CAMK_CDPK           | PK |
| F01_cb8564_c1215/f1p0/3984-1F   | RLK-Pelle_LRR-XI-1  | PK |
| F01_cb8564_c121535/f1p0/1945-0F | RLK-Pelle_RLCK-VIII | PK |
| F01_cb8564_c121572/f1p0/2082-0F | CMGC_SRPK           | PK |

---

---

|                                 |                        |    |
|---------------------------------|------------------------|----|
| F01_cb8564_c121572/f1p0/2082-2F | CMGC_SRPK              | PK |
| F01_cb8564_c121652/f1p0/2604-0F | NAK                    | PK |
| F01_cb8564_c121718/f1p0/2735-1F | AGC_RSK-2              | PK |
| F01_cb8564_c121915/f1p0/2807-0F | RLK-Pelle_RKF3         | PK |
| F01_cb8564_c12192/f1p0/1925-2F  | RLK-Pelle_LRK10L-2     | PK |
| F01_cb8564_c121940/f1p0/2673-0F | RLK-Pelle_RLCK-IXb     | PK |
| F01_cb8564_c121959/f1p0/2723-0F | RLK-Pelle_RLCK-VI      | PK |
| F01_cb8564_c121959/f1p0/2723-2F | RLK-Pelle_RLCK-VI      | PK |
| F01_cb8564_c122242/f1p0/2340-2F | CMGC_MAPK              | PK |
| F01_cb8564_c122273/f1p0/2363-2F | RLK-Pelle_RLCK-IXb     | PK |
| F01_cb8564_c122475/f1p0/2873-0F | CMGC_RCK               | PK |
| F01_cb8564_c122487/f1p0/3064-0F | CMGC_RCK               | PK |
| F01_cb8564_c122615/f2p0/2073-1F | RLK-Pelle_RLCK-XII-1   | PK |
| F01_cb8564_c122671/f1p0/3119-0F | TKL_CTR1-DRK-1         | PK |
| F01_cb8564_c122847/f1p0/2777-0R | CAMK_AMPK              | PK |
| F01_cb8564_c122889/f1p0/3295-0F | CMGC_RCK               | PK |
| F01_cb8564_c122963/f1p0/3278-2F | STE_STE11              | PK |
| F01_cb8564_c123038/f1p0/2682-1F | RLK-Pelle_DLSV         | PK |
| F01_cb8564_c123079/f1p0/1966-1F | RLK-Pelle_RLCK-IXb     | PK |
| F01_cb8564_c123083/f1p0/2536-0F | RLK-Pelle_LRK10L-2     | PK |
| F01_cb8564_c123151/f1p1/3168-2F | RLK-Pelle_RLCK-IXb     | PK |
| F01_cb8564_c123164/f1p0/2333-0F | RLK-Pelle_WAK_LRK10L-1 | PK |
| F01_cb8564_c123171/f1p3/2923-1F | CK1_CK1-PI             | PK |
| F01_cb8564_c123202/f1p0/2686-2F | RLK-Pelle_LRK10L-2     | PK |
| F01_cb8564_c123207/f1p0/2075-0F | CAMK_CAMKL-CHK1        | PK |
| F01_cb8564_c123403/f1p0/2808-0R | RLK-Pelle_LRR-XI-2     | PK |

---

---

|                                 |                        |    |
|---------------------------------|------------------------|----|
| F01_cb8564_c123436/f1p0/3559-2F | RLK-Pelle_RLCK-IXb     | PK |
| F01_cb8564_c123534/f1p0/2994-2F | RLK-Pelle_RLCK-IXb     | PK |
| F01_cb8564_c123711/f1p0/2282-2F | RLK-Pelle_WAK_LRK10L-1 | PK |
| F01_cb8564_c123757/f1p0/2888-0F | RLK-Pelle_CrRLK1L-1    | PK |
| F01_cb8564_c123784/f1p0/2528-1F | CMGC_RCK               | PK |
| F01_cb8564_c123889/f1p0/2931-1F | CMGC_RCK               | PK |
| F01_cb8564_c123889/f1p0/2931-2F | CMGC_RCK               | PK |
| F01_cb8564_c123910/f1p0/1933-2F | RLK-Pelle_DLSV         | PK |
| F01_cb8564_c124059/f1p0/2078-2F | CAMK_AMPK              | PK |
| F01_cb8564_c124114/f4p0/2478-2F | RLK-Pelle_WAK_LRK10L-1 | PK |
| F01_cb8564_c124189/f1p0/2801-1F | CMGC_RCK               | PK |
| F01_cb8564_c124205/f3p0/2236-1F | CMGC_SRPK              | PK |
| F01_cb8564_c124220/f1p0/3115-1F | RLK-Pelle_PERK-1       | PK |
| F01_cb8564_c124226/f1p0/2958-1F | RLK-Pelle_RLCK-IXb     | PK |
| F01_cb8564_c124253/f1p1/3110-1F | TKL_CTR1-DRK-1         | PK |
| F01_cb8564_c124255/f1p0/3874-1F | STE_STE11              | PK |
| F01_cb8564_c124294/f1p0/2474-0F | RLK-Pelle_DLSV         | PK |
| F01_cb8564_c124298/f1p0/2114-1F | CMGC_RCK               | PK |
| F01_cb8564_c124298/f1p0/2114-2F | CMGC_RCK               | PK |
| F01_cb8564_c124354/f1p0/2793-1F | RLK-Pelle_WAK_LRK10L-1 | PK |
| F01_cb8564_c124569/f1p2/2454-2F | RLK-Pelle_DLSV         | PK |
| F01_cb8564_c124590/f2p3/3324-0F | TKL_CTR1-DRK-1         | PK |
| F01_cb8564_c124693/f1p1/2321-0F | TKL_CTR1-DRK-1         | PK |
| F01_cb8564_c124810/f1p0/2494-2F | RLK-Pelle_RKF3         | PK |
| F01_cb8564_c124824/f1p0/3173-0F | CMGC_RCK               | PK |
| F01_cb8564_c124866/f1p1/2690-0F | RLK-Pelle_PERK-1       | PK |

---

---

|                                 |                        |    |
|---------------------------------|------------------------|----|
| F01_cb8564_c124866/f1p1/2690-1F | RLK-Pelle_PERK-1       | PK |
| F01_cb8564_c124887/f1p0/1953-0F | CMGC_GSK               | PK |
| F01_cb8564_c124949/f1p0/2727-0F | RLK-Pelle_DLSV         | PK |
| F01_cb8564_c124949/f1p0/2727-1F | RLK-Pelle_DLSV         | PK |
| F01_cb8564_c125018/f1p0/3452-0F | STE_STE11              | PK |
| F01_cb8564_c125018/f1p0/3452-1F | STE_STE11              | PK |
| F01_cb8564_c125018/f1p0/3452-2F | STE_STE11              | PK |
| F01_cb8564_c125048/f1p0/2689-2F | STE_STE11              | PK |
| F01_cb8564_c125152/f1p0/2135-2F | CAMK_CDPK              | PK |
| F01_cb8564_c125211/f1p0/2958-0F | STE_STE11              | PK |
| F01_cb8564_c125384/f1p0/2816-1F | CK1_CK1                | PK |
| F01_cb8564_c125412/f1p0/2422-0F | CMGC_RCK               | PK |
| F01_cb8564_c125421/f1p0/2128-0F | RLK-Pelle_WAK_LRK10L-1 | PK |
| F01_cb8564_c12553/f1p0/3439-1F  | RLK-Pelle_RLCK-VIIa-2  | PK |
| F01_cb8564_c125605/f2p0/2787-1F | STE_STE11              | PK |
| F01_cb8564_c125690/f1p1/2868-2F | RLK-Pelle_DLSV         | PK |
| F01_cb8564_c125829/f1p0/3356-0F | RLK-Pelle_RLCK-IXb     | PK |
| F01_cb8564_c125829/f1p0/3356-1F | RLK-Pelle_RLCK-IXb     | PK |
| F01_cb8564_c12594/f1p0/2738-2F  | CMGC_MAPK              | PK |
| F01_cb8564_c126020/f1p1/2281-2F | RLK-Pelle_PERK-1       | PK |
| F01_cb8564_c126219/f1p1/2912-0F | TKL-PI-4               | PK |
| F01_cb8564_c126219/f1p1/2912-1F | TKL-PI-4               | PK |
| F01_cb8564_c126283/f1p2/3253-0F | TKL_CTR1-DRK-1         | PK |
| F01_cb8564_c126348/f1p0/3601-2F | CMGC_RCK               | PK |
| F01_cb8564_c12635/f1p0/2906-1F  | Group-Pl-3             | PK |
| F01_cb8564_c126429/f1p0/2339-0F | CAMK_CAMKL-CHK1        | PK |

---

---

|                                 |                        |    |
|---------------------------------|------------------------|----|
| F01_cb8564_c126429/f1p0/2339-2F | CAMK_CAMKL-CBK1        | PK |
| F01_cb8564_c126556/f1p1/2614-2F | CMGC_RCK               | PK |
| F01_cb8564_c126691/f1p1/3817-2F | STE_STE11              | PK |
| F01_cb8564_c126707/f1p0/2918-0F | RLK-Pelle_DLSV         | PK |
| F01_cb8564_c126819/f1p0/3149-0F | TKL_CTR1-DRK-1         | PK |
| F01_cb8564_c126819/f1p0/3149-1F | TKL_CTR1-DRK-1         | PK |
| F01_cb8564_c126961/f1p0/2708-1F | RLK-Pelle_WAK_LRK10L-1 | PK |
| F01_cb8564_c126979/f1p0/2455-1F | RLK-Pelle_WAK_LRK10L-1 | PK |
| F01_cb8564_c1270/f1p0/2203-1F   | CAMK_AMPK              | PK |
| F01_cb8564_c127064/f1p0/2665-0F | RLK-Pelle_WAK_LRK10L-1 | PK |
| F01_cb8564_c127064/f1p0/2665-2F | RLK-Pelle_WAK_LRK10L-1 | PK |
| F01_cb8564_c127210/f1p0/2308-0F | RLK-Pelle_LRK10L-2     | PK |
| F01_cb8564_c127211/f1p0/2256-0F | RLK-Pelle_PERK-1       | PK |
| F01_cb8564_c127257/f1p0/3239-0F | TKL_CTR1-DRK-1         | PK |
| F01_cb8564_c127306/f1p0/3040-0F | CMGC_RCK               | PK |
| F01_cb8564_c127335/f1p0/2345-1F | CAMK_CAMKL-CBK1        | PK |
| F01_cb8564_c127485/f1p0/2563-0F | RLK-Pelle_WAK_LRK10L-1 | PK |
| F01_cb8564_c127495/f1p1/2539-1F | RLK-Pelle_RLCK-VIIa-2  | PK |
| F01_cb8564_c12751/f1p0/3357-0F  | RLK-Pelle_LRR-VIII-1   | PK |
| F01_cb8564_c12751/f1p0/3357-2F  | RLK-Pelle_LRR-VIII-1   | PK |
| F01_cb8564_c127519/f1p0/2902-1F | RLK-Pelle_RLCK-IXb     | PK |
| F01_cb8564_c127591/f1p0/2476-0F | CAMK_CDPK              | PK |
| F01_cb8564_c127591/f1p0/2476-1F | CAMK_CDPK              | PK |
| F01_cb8564_c127715/f2p0/2769-0F | RLK-Pelle_RLCK-IXb     | PK |
| F01_cb8564_c12781/f1p0/3625-0F  | RLK-Pelle_LRR-XI-1     | PK |
| F01_cb8564_c127839/f1p0/2470-0F | RLK-Pelle_WAK_LRK10L-1 | PK |

---

---

|                                 |                        |    |
|---------------------------------|------------------------|----|
| F01_cb8564_c127879/f1p1/3681-2F | TKL_CTR1-DRK-1         | PK |
| F01_cb8564_c127940/f1p0/2066-1F | RLK-Pelle_LRK10L-2     | PK |
| F01_cb8564_c127962/f1p0/2651-0F | STE_STE11              | PK |
| F01_cb8564_c128052/f1p0/2064-0F | RLK-Pelle_RLCK-VIIa-2  | PK |
| F01_cb8564_c128268/f1p0/2378-0F | RLK-Pelle_L-LEC        | PK |
| F01_cb8564_c128385/f1p0/2575-0F | RLK-Pelle_WAK_LRK10L-1 | PK |
| F01_cb8564_c128396/f1p0/2977-1F | RLK-Pelle_LysM         | PK |
| F01_cb8564_c128453/f1p0/2467-1F | TKL-PI-4               | PK |
| F01_cb8564_c128479/f1p0/2340-0F | CMGC_RCK               | PK |
| F01_cb8564_c128479/f1p0/2340-1F | CMGC_RCK               | PK |
| F01_cb8564_c128783/f1p0/2185-2F | RLK-Pelle_WAK_LRK10L-1 | PK |
| F01_cb8564_c1288/f1p0/2349-1F   | CMGC_MAPK              | PK |
| F01_cb8564_c1288/f1p0/2349-2F   | CMGC_MAPK              | PK |
| F01_cb8564_c12886/f1p0/2334-1F  | AGC-PI                 | PK |
| F01_cb8564_c128872/f1p0/2506-0F | CMGC_RCK               | PK |
| F01_cb8564_c1289/f1p1/2238-0F   | CMGC_MAPK              | PK |
| F01_cb8564_c1290/f1p0/1928-1F   | CMGC_MAPK              | PK |
| F01_cb8564_c129038/f1p0/2416-2F | RLK-Pelle_PERK-1       | PK |
| F01_cb8564_c129118/f1p0/2569-0F | CMGC_RCK               | PK |
| F01_cb8564_c129120/f1p0/2596-0F | RLK-Pelle_DLSV         | PK |
| F01_cb8564_c129136/f1p0/2515-0F | RLK-Pelle_WAK_LRK10L-1 | PK |
| F01_cb8564_c129146/f1p0/2383-2F | RLK-Pelle_WAK_LRK10L-1 | PK |
| F01_cb8564_c129154/f1p0/2632-0F | CMGC_RCK               | PK |
| F01_cb8564_c129215/f1p0/2844-2F | STE_STE11              | PK |
| F01_cb8564_c129236/f1p0/2711-0F | RLK-Pelle_WAK_LRK10L-1 | PK |
| F01_cb8564_c129260/f1p0/2454-0F | AGC-PI                 | PK |

---



---

|                                 |                       |    |
|---------------------------------|-----------------------|----|
| F01_cb8564_c129260/f1p0/2454-2F | AGC-PI                | PK |
| F01_cb8564_c129286/f1p0/2001-1F | RLK-Pelle_CrRLK1L-1   | PK |
| F01_cb8564_c129352/f1p0/2700-0F | RLK-Pelle_DLSV        | PK |
| F01_cb8564_c129352/f1p0/2700-2F | RLK-Pelle_DLSV        | PK |
| F01_cb8564_c129379/f1p0/3821-1F | RLK-Pelle_RLCK-IXb    | PK |
| F01_cb8564_c129472/f1p0/2679-2F | RLK-Pelle_DLSV        | PK |
| F01_cb8564_c129695/f1p0/2575-2F | RLK-Pelle_RKF3        | PK |
| F01_cb8564_c129919/f1p0/2904-2F | RLK-Pelle_RLCK-IXb    | PK |
| F01_cb8564_c130071/f1p0/4218-2F | STE_STE11             | PK |
| F01_cb8564_c130150/f1p1/2667-2F | CMGC_RCK              | PK |
| F01_cb8564_c130207/f1p0/2575-1F | RLK-Pelle_DLSV        | PK |
| F01_cb8564_c13026/f1p0/4872-0F  | RLK-Pelle_CrRLK1L-1   | PK |
| F01_cb8564_c13026/f1p0/4872-2F  | RLK-Pelle_RLCK-VIIa-2 | PK |
| F01_cb8564_c130264/f1p0/2624-0F | CMGC_RCK              | PK |
| F01_cb8564_c13031/f1p0/2119-0F  | RLK-Pelle_LRR-IV      | PK |
| F01_cb8564_c13031/f1p0/2119-2F  | RLK-Pelle_LRR-IV      | PK |
| F01_cb8564_c13077/f1p0/3535-1F  | RLK-Pelle_LRR-XII-1   | PK |
| F01_cb8564_c131213/f1p2/2634-0F | RLK-Pelle_RLCK-VI     | PK |
| F01_cb8564_c131213/f1p2/2634-2F | RLK-Pelle_RLCK-VI     | PK |
| F01_cb8564_c132218/f1p5/2319-1F | RLK-Pelle_LysM        | PK |
| F01_cb8564_c13234/f1p0/3522-1F  | CMGC_CDK-PITSLRE      | PK |
| F01_cb8564_c13254/f1p0/3855-1F  | RLK-Pelle_RLCK-VIIa-2 | PK |
| F01_cb8564_c13467/f1p0/3088-1F  | CMGC_CDK-PITSLRE      | PK |
| F01_cb8564_c13502/f1p1/4106-0F  | RLK-Pelle_RLCK-VIIa-2 | PK |
| F01_cb8564_c13502/f1p1/4106-1F  | RLK-Pelle_CrRLK1L-1   | PK |
| F01_cb8564_c13502/f1p1/4106-2F  | RLK-Pelle_RLCK-VIIa-2 | PK |

---

---

|                                 |                       |    |
|---------------------------------|-----------------------|----|
| F01_cb8564_c13527/f1p0/3096-1F  | STE_STE11             | PK |
| F01_cb8564_c13574/f1p0/2342-0F  | RLK-Pelle_DLSV        | PK |
| F01_cb8564_c1361/f1p0/3334-1F   | CMGC_MAPK             | PK |
| F01_cb8564_c1362/f1p0/3486-1F   | CMGC_MAPK             | PK |
| F01_cb8564_c1363/f1p0/2245-1F   | CMGC_MAPK             | PK |
| F01_cb8564_c1363/f1p0/2245-2F   | CMGC_MAPK             | PK |
| F01_cb8564_c1364/f1p0/2214-1F   | CMGC_MAPK             | PK |
| F01_cb8564_c136802/f2p3/2749-2F | RLK-Pelle_RLCK-VI     | PK |
| F01_cb8564_c1370/f1p0/2891-0F   | CMGC_MAPK             | PK |
| F01_cb8564_c1371/f2p1/3040-2F   | CMGC_MAPK             | PK |
| F01_cb8564_c1372/f1p0/2553-2F   | CMGC_MAPK             | PK |
| F01_cb8564_c1374/f1p0/3856-0F   | CMGC_MAPK             | PK |
| F01_cb8564_c1374/f1p0/3856-1F   | CMGC_MAPK             | PK |
| F01_cb8564_c1374/f1p0/3856-2F   | CMGC_MAPK             | PK |
| F01_cb8564_c1375/f1p0/2963-0F   | CMGC_MAPK             | PK |
| F01_cb8564_c137667/f2p2/2686-2F | CK1_CK1-PI            | PK |
| F01_cb8564_c1377/f1p0/2527-1F   | CMGC_MAPK             | PK |
| F01_cb8564_c1377/f1p0/2527-2F   | CMGC_MAPK             | PK |
| F01_cb8564_c1378/f1p0/2739-0F   | CMGC_MAPK             | PK |
| F01_cb8564_c13789/f1p1/3323-1F  | CMGC_CDK-PITSLRE      | PK |
| F01_cb8564_c1380/f2p0/2966-1F   | CMGC_MAPK             | PK |
| F01_cb8564_c1385/f3p0/2409-0F   | CMGC_MAPK             | PK |
| F01_cb8564_c1386/f1p0/2304-1F   | CMGC_MAPK             | PK |
| F01_cb8564_c13876/f1p2/3265-1F  | CMGC_CDK-PITSLRE      | PK |
| F01_cb8564_c14035/f1p0/3566-0F  | RLK-Pelle_RLCK-VIIa-2 | PK |
| F01_cb8564_c14035/f1p0/3566-1F  | RLK-Pelle_CrRLK1L-1   | PK |

---

---

|                                  |                       |    |
|----------------------------------|-----------------------|----|
| F01_cb8564_c14125/f1p1/3319-2F   | RLK-Pelle_LRR-XII-1   | PK |
| F01_cb8564_c141549/f3p0/2691-1F  | CK1_CK1-PI            | PK |
| F01_cb8564_c14392/f1p0/3747-0F   | CMGC_MAPK             | PK |
| F01_cb8564_c14392/f1p0/3747-1F   | CMGC_MAPK             | PK |
| F01_cb8564_c14392/f1p0/3747-2F   | CMGC_MAPK             | PK |
| F01_cb8564_c14418/f1p0/3613-1F   | RLK-Pelle_RLCK-VIIa-2 | PK |
| F01_cb8564_c14458/f1p0/2514-0F   | AGC-PI                | PK |
| F01_cb8564_c1450/f1p0/3000-1F    | RLK-Pelle_LRR-Xa      | PK |
| F01_cb8564_c1451/f4p0/2452-1F    | RLK-Pelle_LRR-Xa      | PK |
| F01_cb8564_c1455/f2p1/2542-2F    | RLK-Pelle_LRR-Xa      | PK |
| F01_cb8564_c145553/f1p3/3270-0F  | WNK_NRBP              | PK |
| F01_cb8564_c145553/f1p3/3270-2F  | WNK_NRBP              | PK |
| F01_cb8564_c1456/f2p1/2629-2F    | RLK-Pelle_LRR-Xa      | PK |
| F01_cb8564_c145669/f3p0/2544-1F  | RLK-Pelle_DLSV        | PK |
| F01_cb8564_c1457/f1p0/2947-2F    | RLK-Pelle_LRR-Xa      | PK |
| F01_cb8564_c145775/f16p1/2617-0F | AGC_RSK-2             | PK |
| F01_cb8564_c145775/f16p1/2617-1F | AGC_RSK-2             | PK |
| F01_cb8564_c145991/f10p2/2099-0F | CAMK_AMPK             | PK |
| F01_cb8564_c145998/f5p0/2918-1F  | Group-PI-3            | PK |
| F01_cb8564_c146016/f5p1/3267-0F  | RLK-Pelle_LRR-IX      | PK |
| F01_cb8564_c146056/f3p0/3230-2F  | RLK-Pelle_RLCK-VIIa-2 | PK |
| F01_cb8564_c146148/f2p5/3291-0F  | RLK-Pelle_LRR-VIII-1  | PK |
| F01_cb8564_c14618/f5p1/3581-0F   | RLK-Pelle_LRR-XI-1    | PK |
| F01_cb8564_c146191/f1p0/2060-0F  | RLK-Pelle_LRR-XI-1    | PK |
| F01_cb8564_c146191/f1p0/2060-1F  | RLK-Pelle_LRR-XI-1    | PK |
| F01_cb8564_c1462/f3p1/2646-0F    | RLK-Pelle_LRR-Xa      | PK |

---

---

|                                  |                        |    |
|----------------------------------|------------------------|----|
| F01_cb8564_c146236/f7p0/3381-1F  | RLK-Pelle_SD-2b        | PK |
| F01_cb8564_c146340/f7p1/2494-1F  | RLK-Pelle_LRR-II       | PK |
| F01_cb8564_c146477/f9p0/3025-1F  | TKL_CTR1-DRK-1         | PK |
| F01_cb8564_c146485/f4p0/2047-2F  | RLK-Pelle_RLCK-VIIa-2  | PK |
| F01_cb8564_c146492/f2p2/2580-2F  | RLK-Pelle_L-LEC        | PK |
| F01_cb8564_c146651/f7p1/2500-1F  | RLK-Pelle_PERK-1       | PK |
| F01_cb8564_c146666/f3p0/3094-2F  | RLK-Pelle_RLCK-IXb     | PK |
| F01_cb8564_c146680/f3p1/2465-1F  | RLK-Pelle_WAK_LRK10L-1 | PK |
| F01_cb8564_c146687/f3p2/2506-2F  | RLK-Pelle_PERK-1       | PK |
| F01_cb8564_c146690/f2p0/2014-2F  | RLK-Pelle_RLCK-VIIa-2  | PK |
| F01_cb8564_c146791/f2p0/2690-1F  | CK1_CK1-PI             | PK |
| F01_cb8564_c1468/f1p0/4772-2F    | RLK-Pelle_LRR-XI-1     | PK |
| F01_cb8564_c147030/f5p3/2289-2F  | RLK-Pelle_L-LEC        | PK |
| F01_cb8564_c147075/f38p6/2315-0F | RLK-Pelle_DLSV         | PK |
| F01_cb8564_c147078/f1p1/2160-1F  | RLK-Pelle_PERK-1       | PK |
| F01_cb8564_c147106/f4p0/2896-1F  | RLK-Pelle_RLCK-IXb     | PK |
| F01_cb8564_c1473/f1p0/4329-0F    | RLK-Pelle_LRR-XI-1     | PK |
| F01_cb8564_c147440/f3p2/2538-0F  | RLK-Pelle_L-LEC        | PK |
| F01_cb8564_c1475/f1p0/2478-2F    | RLK-Pelle_LRR-XI-1     | PK |
| F01_cb8564_c1476/f1p0/2955-2F    | RLK-Pelle_LRR-XI-1     | PK |
| F01_cb8564_c14764/f1p0/4059-2F   | STE_STE11              | PK |
| F01_cb8564_c1477/f1p0/3841-1F    | RLK-Pelle_LRR-XI-1     | PK |
| F01_cb8564_c1478/f1p1/3616-1F    | RLK-Pelle_LRR-XI-1     | PK |
| F01_cb8564_c1480/f3p0/3284-0F    | RLK-Pelle_LRR-XI-1     | PK |
| F01_cb8564_c1481/f1p0/3196-0F    | RLK-Pelle_LRR-XI-1     | PK |
| F01_cb8564_c14816/f1p0/3943-2F   | STE_STE11              | PK |

---

---

|                                 |                        |    |
|---------------------------------|------------------------|----|
| F01_cb8564_c1483/f1p0/3257-0F   | RLK-Pelle_LRR-XI-1     | PK |
| F01_cb8564_c1484/f1p0/3004-0F   | RLK-Pelle_LRR-XI-1     | PK |
| F01_cb8564_c1484/f1p0/3004-1F   | RLK-Pelle_LRR-XI-1     | PK |
| F01_cb8564_c1488/f1p0/3089-0F   | RLK-Pelle_LRR-XI-1     | PK |
| F01_cb8564_c149007/f1p1/3589-1F | RLK-Pelle_RLCK-VIII    | PK |
| F01_cb8564_c150256/f1p0/2131-1F | RLK-Pelle_RLCK-VIIa-2  | PK |
| F01_cb8564_c15042/f2p0/2695-1F  | RLK-Pelle_LRR-I-1      | PK |
| F01_cb8564_c15087/f1p1/3594-2F  | CMGC_CDK-PITSLRE       | PK |
| F01_cb8564_c15143/f7p3/4165-1F  | RLK-Pelle_LRR-XI-1     | PK |
| F01_cb8564_c152120/f1p3/2607-2F | RLK-Pelle_L-LEC        | PK |
| F01_cb8564_c15227/f1p0/3770-1F  | RLK-Pelle_CrRLK1L-1    | PK |
| F01_cb8564_c15227/f1p0/3770-2F  | RLK-Pelle_CrRLK1L-1    | PK |
| F01_cb8564_c153439/f1p1/3724-0F | RLK-Pelle_DLSV         | PK |
| F01_cb8564_c153439/f1p1/3724-1F | RLK-Pelle_DLSV         | PK |
| F01_cb8564_c154026/f1p0/2823-0F | CMGC_MAPK              | PK |
| F01_cb8564_c154638/f1p1/3274-2F | RLK-Pelle_LRR-IX       | PK |
| F01_cb8564_c154750/f1p1/2417-0F | RLK-Pelle_CrRLK1L-1    | PK |
| F01_cb8564_c15491/f2p1/2821-0F  | CMGC_MAPK              | PK |
| F01_cb8564_c15491/f2p1/2821-1F  | CMGC_MAPK              | PK |
| F01_cb8564_c155311/f1p0/3003-0F | RLK-Pelle_RLCK-IXb     | PK |
| F01_cb8564_c15568/f1p0/2322-0F  | RLK-Pelle_DLSV         | PK |
| F01_cb8564_c157100/f1p0/2517-0F | RLK-Pelle_LRR-IV       | PK |
| F01_cb8564_c157733/f1p1/3325-0F | RLK-Pelle_DLSV         | PK |
| F01_cb8564_c158886/f1p0/2691-2F | CK1_CK1                | PK |
| F01_cb8564_c159301/f2p0/2930-1F | Group-Pl-3             | PK |
| F01_cb8564_c160054/f1p0/2479-2F | RLK-Pelle_WAK_LRK10L-1 | PK |

---

---

|                                 |                        |    |
|---------------------------------|------------------------|----|
| F01_cb8564_c16064/f1p0/3198-2F  | RLK-Pelle_LRK10L-2     | PK |
| F01_cb8564_c16070/f1p1/3687-0F  | RLK-Pelle_LRR-XII-1    | PK |
| F01_cb8564_c16159/f1p0/3072-0F  | RLK-Pelle_CrRLK1L-1    | PK |
| F01_cb8564_c16159/f1p0/3072-2F  | RLK-Pelle_RLCK-VIIa-2  | PK |
| F01_cb8564_c16162/f1p1/4558-0F  | RLK-Pelle_RLCK-VIIa-2  | PK |
| F01_cb8564_c16162/f1p1/4558-2F  | RLK-Pelle_CrRLK1L-1    | PK |
| F01_cb8564_c16220/f12p0/3116-0F | RLK-Pelle_CrRLK1L-1    | PK |
| F01_cb8564_c16231/f1p0/3606-2F  | RLK-Pelle_CrRLK1L-1    | PK |
| F01_cb8564_c16349/f1p0/4828-2F  | CMGC_CDK-PITSLRE       | PK |
| F01_cb8564_c16468/f1p1/2237-0F  | RLK-Pelle_DLSV         | PK |
| F01_cb8564_c16468/f1p1/2237-2F  | RLK-Pelle_DLSV         | PK |
| F01_cb8564_c16516/f1p0/4473-1F  | RLK-Pelle_LRR-XI-1     | PK |
| F01_cb8564_c16649/f1p0/3722-0F  | RLK-Pelle_RLCK-VIII    | PK |
| F01_cb8564_c16650/f1p0/2552-0F  | STE_STE11              | PK |
| F01_cb8564_c16650/f1p0/2552-2F  | STE_STE11              | PK |
| F01_cb8564_c16688/f1p1/3526-1F  | RLK-Pelle_LRR-XII-1    | PK |
| F01_cb8564_c167108/f1p0/2919-1F | WNK_NRBP               | PK |
| F01_cb8564_c16897/f1p0/3118-0F  | RLK-Pelle_CrRLK1L-1    | PK |
| F01_cb8564_c16897/f1p0/3118-2F  | RLK-Pelle_CrRLK1L-1    | PK |
| F01_cb8564_c16954/f1p1/3233-0F  | RLK-Pelle_WAK_LRK10L-1 | PK |
| F01_cb8564_c16954/f1p1/3233-1F  | RLK-Pelle_WAK_LRK10L-1 | PK |
| F01_cb8564_c17058/f1p0/3724-1F  | RLK-Pelle_LRR-XII-1    | PK |
| F01_cb8564_c171109/f1p1/2188-0F | RLK-Pelle_LysM         | PK |
| F01_cb8564_c17117/f1p0/4269-1F  | TKL-PI-4               | PK |
| F01_cb8564_c17225/f1p1/3107-1F  | STE_STE11              | PK |
| F01_cb8564_c17225/f1p1/3107-2F  | STE_STE11              | PK |

---

---

|                                 |                       |    |
|---------------------------------|-----------------------|----|
| F01_cb8564_c17291/f1p0/2775-0F  | RLK-Pelle_LRR-XII-1   | PK |
| F01_cb8564_c17291/f1p0/2775-1F  | RLK-Pelle_LRR-XII-1   | PK |
| F01_cb8564_c17396/f1p1/3193-0F  | RLK-Pelle_LRR-VIII-1  | PK |
| F01_cb8564_c174230/f1p1/2759-0F | CMGC_RCK              | PK |
| F01_cb8564_c17503/f1p0/4953-1F  | CMGC_MAPK             | PK |
| F01_cb8564_c175946/f1p1/3002-2F | RLK-Pelle_CrRLK1L-1   | PK |
| F01_cb8564_c17887/f1p0/2275-0F  | RLK-Pelle_CrRLK1L-1   | PK |
| F01_cb8564_c17887/f1p0/2275-2F  | RLK-Pelle_CrRLK1L-1   | PK |
| F01_cb8564_c18017/f1p0/4120-0F  | RLK-Pelle_CrRLK1L-1   | PK |
| F01_cb8564_c18017/f1p0/4120-2F  | RLK-Pelle_RLCK-VIIa-2 | PK |
| F01_cb8564_c18173/f1p0/4165-1F  | RLK-Pelle_LRR-XI-1    | PK |
| F01_cb8564_c182592/f1p0/2600-2F | CMGC_RCK              | PK |
| F01_cb8564_c18267/f1p0/4385-2F  | STE_STE11             | PK |
| F01_cb8564_c18494/f1p0/4108-0F  | RLK-Pelle_SD-2b       | PK |
| F01_cb8564_c18681/f1p0/3658-0F  | RLK-Pelle_SD-2b       | PK |
| F01_cb8564_c18690/f1p0/2323-2F  | RLK-Pelle_DLSV        | PK |
| F01_cb8564_c18753/f1p0/2990-0F  | RLK-Pelle_DLSV        | PK |
| F01_cb8564_c18753/f1p0/2990-1F  | RLK-Pelle_DLSV        | PK |
| F01_cb8564_c18757/f1p0/2729-1F  | RLK-Pelle_DLSV        | PK |
| F01_cb8564_c18757/f1p0/2729-2F  | RLK-Pelle_DLSV        | PK |
| F01_cb8564_c18824/f2p0/3618-1F  | RLK-Pelle_DLSV        | PK |
| F01_cb8564_c19339/f1p1/3362-2F  | CMGC_CDK-PITSLRE      | PK |
| F01_cb8564_c19433/f1p0/3193-1F  | RLK-Pelle_LRR-XII-1   | PK |
| F01_cb8564_c19617/f1p0/4907-1F  | RLK-Pelle_CrRLK1L-1   | PK |
| F01_cb8564_c19646/f1p0/4614-1F  | RLK-Pelle_RLCK-VIIa-2 | PK |
| F01_cb8564_c19646/f1p0/4614-2F  | RLK-Pelle_CrRLK1L-1   | PK |

---

---

|                                |                       |    |
|--------------------------------|-----------------------|----|
| F01_cb8564_c1970/f1p0/3046-0F  | CAMK_CAMKL-CHK1       | PK |
| F01_cb8564_c1971/f1p0/2751-0F  | CAMK_CAMKL-CHK1       | PK |
| F01_cb8564_c1971/f1p0/2751-2F  | CAMK_CAMKL-CHK1       | PK |
| F01_cb8564_c1972/f1p0/2732-0F  | CAMK_CAMKL-CHK1       | PK |
| F01_cb8564_c1974/f1p0/3059-0F  | CAMK_CAMKL-CHK1       | PK |
| F01_cb8564_c1974/f1p0/3059-1F  | CAMK_CAMKL-CHK1       | PK |
| F01_cb8564_c1974/f1p0/3059-2F  | CAMK_CAMKL-CHK1       | PK |
| F01_cb8564_c1976/f1p0/2327-0F  | CAMK_CAMKL-CHK1       | PK |
| F01_cb8564_c1976/f1p0/2327-1F  | CAMK_CAMKL-CHK1       | PK |
| F01_cb8564_c1977/f1p0/2532-1F  | CAMK_CAMKL-CHK1       | PK |
| F01_cb8564_c1978/f1p1/1997-1F  | CAMK_CAMKL-CHK1       | PK |
| F01_cb8564_c1981/f1p0/1910-0F  | CAMK_CAMKL-CHK1       | PK |
| F01_cb8564_c1983/f1p0/2537-2F  | RLK-Pelle_LRK10L-2    | PK |
| F01_cb8564_c1984/f1p0/2181-0F  | RLK-Pelle_LRK10L-2    | PK |
| F01_cb8564_c1984/f1p0/2181-1F  | RLK-Pelle_LRK10L-2    | PK |
| F01_cb8564_c1984/f1p0/2181-2F  | RLK-Pelle_LRK10L-2    | PK |
| F01_cb8564_c19894/f1p0/2891-1F | RLK-Pelle_RLCK-VIIa-2 | PK |
| F01_cb8564_c19894/f1p0/2891-2F | RLK-Pelle_CrRLK1L-1   | PK |
| F01_cb8564_c19999/f1p0/2804-1F | CMGC_MAPK             | PK |
| F01_cb8564_c20025/f1p0/3787-1F | RLK-Pelle_LRR-IX      | PK |
| F01_cb8564_c20112/f1p0/3162-1F | RLK-Pelle_DLSV        | PK |
| F01_cb8564_c20112/f1p0/3162-2F | RLK-Pelle_DLSV        | PK |
| F01_cb8564_c20113/f1p0/2614-1F | RLK-Pelle_DLSV        | PK |
| F01_cb8564_c20119/f1p0/3346-0F | RLK-Pelle_DLSV        | PK |
| F01_cb8564_c20204/f1p0/3519-0F | CMGC_MAPK             | PK |
| F01_cb8564_c20204/f1p0/3519-2F | CMGC_MAPK             | PK |

---



---

|                                |                       |    |
|--------------------------------|-----------------------|----|
| F01_cb8564_c20337/f1p1/3326-1F | CMGC_CDK-PITSLRE      | PK |
| F01_cb8564_c2041/f2p1/3039-1F  | RLK-Pelle_RLCK-VIIa-2 | PK |
| F01_cb8564_c2041/f2p1/3039-2F  | RLK-Pelle_RLCK-VIIa-2 | PK |
| F01_cb8564_c2042/f2p1/2865-0F  | RLK-Pelle_RLCK-VIIa-2 | PK |
| F01_cb8564_c2042/f2p1/2865-2F  | RLK-Pelle_RLCK-VIIa-2 | PK |
| F01_cb8564_c2045/f1p0/1948-1F  | RLK-Pelle_RLCK-VIIa-2 | PK |
| F01_cb8564_c20573/f1p0/3664-1F | RLK-Pelle_LRK10L-2    | PK |
| F01_cb8564_c2068/f1p0/2547-2F  | RLK-Pelle_RLCK-VIIa-2 | PK |
| F01_cb8564_c20845/f1p0/3839-1F | TKL-PI-4              | PK |
| F01_cb8564_c21151/f1p0/3128-0F | RLK-Pelle_DLSV        | PK |
| F01_cb8564_c21334/f1p0/4233-2F | CMGC_CDK-PITSLRE      | PK |
| F01_cb8564_c21471/f1p0/3237-0F | RLK-Pelle_LRK10L-2    | PK |
| F01_cb8564_c21471/f1p0/3237-2F | RLK-Pelle_LRK10L-2    | PK |
| F01_cb8564_c21541/f1p0/2864-0F | Group-PI-3            | PK |
| F01_cb8564_c21635/f1p0/3294-0F | RLK-Pelle_LRR-I-1     | PK |
| F01_cb8564_c21778/f1p0/3229-1F | RLK-Pelle_DLSV        | PK |
| F01_cb8564_c22298/f1p0/2771-2F | RLK-Pelle_DLSV        | PK |
| F01_cb8564_c22447/f1p0/4272-0F | RLK-Pelle_LRR-XI-1    | PK |
| F01_cb8564_c22452/f1p0/3321-0F | RLK-Pelle_DLSV        | PK |
| F01_cb8564_c22475/f1p0/1967-0F | RLK-Pelle_RLCK-VIIa-2 | PK |
| F01_cb8564_c22475/f1p0/1967-2F | RLK-Pelle_RLCK-VIIa-2 | PK |
| F01_cb8564_c22570/f1p0/3631-1F | RLK-Pelle_LRR-IX      | PK |
| F01_cb8564_c22623/f1p0/3058-0F | RLK-Pelle_LRR-XII-1   | PK |
| F01_cb8564_c22630/f1p0/2676-1F | RLK-Pelle_LRR-XII-1   | PK |
| F01_cb8564_c22662/f1p0/3838-1F | STE_STE11             | PK |
| F01_cb8564_c22662/f1p0/3838-2F | STE_STE11             | PK |

---

---

|                                |                        |    |
|--------------------------------|------------------------|----|
| F01_cb8564_c22900/f1p1/3151-1F | RLK-Pelle_LRR-VIII-1   | PK |
| F01_cb8564_c22900/f1p1/3151-2F | RLK-Pelle_LRR-VIII-1   | PK |
| F01_cb8564_c23001/f1p0/2423-1F | CMGC_CDK-PITSLRE       | PK |
| F01_cb8564_c23009/f1p0/3941-2F | RLK-Pelle_RLCK-VIII    | PK |
| F01_cb8564_c23076/f1p0/3542-1F | RLK-Pelle_LRR-VI-2     | PK |
| F01_cb8564_c23090/f2p0/3109-2F | STE_STE7               | PK |
| F01_cb8564_c23276/f1p0/3993-2F | RLK-Pelle_CrRLK1L-1    | PK |
| F01_cb8564_c23407/f1p0/2923-0F | Group-PI-3             | PK |
| F01_cb8564_c23426/f1p0/4026-1F | RLK-Pelle_CrRLK1L-1    | PK |
| F01_cb8564_c23426/f1p0/4026-2F | RLK-Pelle_RLCK-VIIa-2  | PK |
| F01_cb8564_c23446/f1p0/2833-0F | RLK-Pelle_CrRLK1L-1    | PK |
| F01_cb8564_c23546/f1p0/4263-2F | CMGC_CDK-PITSLRE       | PK |
| F01_cb8564_c23631/f1p0/4582-0F | RLK-Pelle_DLSV         | PK |
| F01_cb8564_c24281/f1p0/3435-2F | CMGC_CDK-PITSLRE       | PK |
| F01_cb8564_c24283/f2p0/3438-0F | RLK-Pelle_LRR-XII-1    | PK |
| F01_cb8564_c2433/f1p4/3038-1F  | CAMK_CDPK              | PK |
| F01_cb8564_c24450/f1p1/2884-1F | RLK-Pelle_LRR-XII-1    | PK |
| F01_cb8564_c24757/f1p0/4390-1F | RLK-Pelle_CrRLK1L-1    | PK |
| F01_cb8564_c24799/f1p2/4162-1F | RLK-Pelle_CrRLK1L-1    | PK |
| F01_cb8564_c24907/f2p1/2371-2F | RLK-Pelle_WAK_LRK10L-1 | PK |
| F01_cb8564_c24976/f1p1/3685-0F | CMGC_CDK-PITSLRE       | PK |
| F01_cb8564_c25024/f1p0/3748-1F | STE_STE11              | PK |
| F01_cb8564_c25105/f3p1/4062-1F | RLK-Pelle_RLCK-VIIa-2  | PK |
| F01_cb8564_c25347/f4p1/3671-2F | RLK-Pelle_LRR-VIII-1   | PK |
| F01_cb8564_c25433/f2p0/2642-1F | RLK-Pelle_DLSV         | PK |
| F01_cb8564_c25442/f1p0/2908-0F | RLK-Pelle_CrRLK1L-1    | PK |

---

---

|                                 |                        |    |
|---------------------------------|------------------------|----|
| F01_cb8564_c25444/f2p0/3991-0F  | RLK-Pelle_RLCK-VIIa-2  | PK |
| F01_cb8564_c25444/f2p0/3991-1F  | RLK-Pelle_CrRLK1L-1    | PK |
| F01_cb8564_c2556/f1p0/2194-0F   | RLK-Pelle_LRK10L-2     | PK |
| F01_cb8564_c2556/f1p0/2194-2F   | RLK-Pelle_LRK10L-2     | PK |
| F01_cb8564_c2557/f2p0/2375-2F   | RLK-Pelle_LRK10L-2     | PK |
| F01_cb8564_c2559/f1p1/2250-0F   | RLK-Pelle_LRK10L-2     | PK |
| F01_cb8564_c2560/f3p0/2832-2F   | RLK-Pelle_LRK10L-2     | PK |
| F01_cb8564_c25609/f1p0/3062-0F  | RLK-Pelle_LRR-XII-1    | PK |
| F01_cb8564_c26895/f3p0/2222-1F  | RLK-Pelle_CrRLK1L-1    | PK |
| F01_cb8564_c26915/f3p0/3758-0F  | RLK-Pelle_LRR-XII-1    | PK |
| F01_cb8564_c3013/f1p1/2638-2F   | RLK-Pelle_WAK_LRK10L-1 | PK |
| F01_cb8564_c31691/f6p2/3305-1F  | CMGC_CDK-PITSLRE       | PK |
| F01_cb8564_c31696/f14p0/2701-0F | RLK-Pelle_SD-2b        | PK |
| F01_cb8564_c31960/f12p2/4203-2F | RLK-Pelle_RLCK-VIIa-2  | PK |
| F01_cb8564_c31975/f2p1/2253-2F  | STE_STE11              | PK |
| F01_cb8564_c32018/f2p0/4095-0F  | RLK-Pelle_RLCK-VIIa-2  | PK |
| F01_cb8564_c32018/f2p0/4095-2F  | RLK-Pelle_CrRLK1L-1    | PK |
| F01_cb8564_c32023/f3p0/3253-1F  | RLK-Pelle_CrRLK1L-1    | PK |
| F01_cb8564_c32024/f4p1/4197-2F  | RLK-Pelle_RLCK-VIIa-2  | PK |
| F01_cb8564_c32899/f13p0/3234-1F | RLK-Pelle_CrRLK1L-1    | PK |
| F01_cb8564_c3319/f1p0/2765-2F   | RLK-Pelle_LRR-I-1      | PK |
| F01_cb8564_c3320/f1p0/2486-1F   | RLK-Pelle_LRR-I-1      | PK |
| F01_cb8564_c33393/f7p2/3346-2F  | RLK-Pelle_DLSV         | PK |
| F01_cb8564_c334/f9p1/2646-0F    | RLK-Pelle_LRR-Xa       | PK |
| F01_cb8564_c33672/f2p0/2453-0F  | RLK-Pelle_DLSV         | PK |
| F01_cb8564_c33720/f9p0/2495-1F  | RLK-Pelle_DLSV         | PK |

---

---

|                                |                     |    |
|--------------------------------|---------------------|----|
| F01_cb8564_c33787/f6p0/2712-0F | RLK-Pelle_CrRLK1L-1 | PK |
| F01_cb8564_c33936/f7p0/2581-0F | RLK-Pelle_DLSV      | PK |
| F01_cb8564_c33936/f7p0/2581-2F | RLK-Pelle_DLSV      | PK |
| F01_cb8564_c34046/f3p0/2667-2F | RLK-Pelle_DLSV      | PK |
| F01_cb8564_c34047/f2p0/3175-0F | RLK-Pelle_DLSV      | PK |
| F01_cb8564_c34050/f2p1/3258-1F | RLK-Pelle_DLSV      | PK |
| F01_cb8564_c34131/f3p0/2847-2F | RLK-Pelle_SD-2b     | PK |
| F01_cb8564_c34141/f2p2/3036-0F | RLK-Pelle_CrRLK1L-1 | PK |
| F01_cb8564_c34141/f2p2/3036-1F | RLK-Pelle_CrRLK1L-1 | PK |
| F01_cb8564_c34141/f2p2/3036-2F | RLK-Pelle_CrRLK1L-1 | PK |
| F01_cb8564_c34176/f3p0/3161-0F | TKL-PI-4            | PK |
| F01_cb8564_c34189/f2p0/2891-0F | RLK-Pelle_CrRLK1L-1 | PK |
| F01_cb8564_c34195/f2p1/2830-0F | WNK_NRBP            | PK |
| F01_cb8564_c34195/f2p1/2830-2F | WNK_NRBP            | PK |
| F01_cb8564_c34397/f1p1/3138-0F | RLK-Pelle_CrRLK1L-1 | PK |
| F01_cb8564_c34437/f2p1/2950-1F | RLK-Pelle_CrRLK1L-1 | PK |
| F01_cb8564_c34906/f1p0/3905-0F | CMGC_GSK            | PK |
| F01_cb8564_c34920/f1p1/3239-2F | RLK-Pelle_DLSV      | PK |
| F01_cb8564_c34943/f1p0/2034-0F | RLK-Pelle_DLSV      | PK |
| F01_cb8564_c35196/f1p0/3115-1F | RLK-Pelle_DLSV      | PK |
| F01_cb8564_c35196/f1p0/3115-2F | RLK-Pelle_DLSV      | PK |
| F01_cb8564_c35208/f1p0/2151-1F | RLK-Pelle_PERK-1    | PK |
| F01_cb8564_c35259/f2p2/2450-2F | RLK-Pelle_PERK-1    | PK |
| F01_cb8564_c35284/f1p0/4390-2F | RLK-Pelle_LRR-XI-1  | PK |
| F01_cb8564_c35419/f2p4/3123-0F | RLK-Pelle_CrRLK1L-1 | PK |
| F01_cb8564_c35567/f2p1/2669-1F | RLK-Pelle_DLSV      | PK |

---

---

|                                |                     |    |
|--------------------------------|---------------------|----|
| F01_cb8564_c35913/f1p0/2772-2F | RLK-Pelle_DLSV      | PK |
| F01_cb8564_c35970/f1p0/2874-0F | Group-Pl-3          | PK |
| F01_cb8564_c35970/f1p0/2874-1F | Group-Pl-3          | PK |
| F01_cb8564_c35970/f1p0/2874-2F | Group-Pl-3          | PK |
| F01_cb8564_c35971/f1p0/3519-0F | RLK-Pelle_DLSV      | PK |
| F01_cb8564_c36018/f1p0/1971-1F | RLK-Pelle_LRR-XI-1  | PK |
| F01_cb8564_c36029/f1p1/2932-0F | RLK-Pelle_DLSV      | PK |
| F01_cb8564_c36029/f1p1/2932-2F | RLK-Pelle_DLSV      | PK |
| F01_cb8564_c36140/f1p1/4637-2F | RLK-Pelle_DLSV      | PK |
| F01_cb8564_c362/f8p0/2792-0F   | CMGC_CDK-CRK7-CDK9  | PK |
| F01_cb8564_c36204/f3p0/3065-1F | RLK-Pelle_CrRLK1L-1 | PK |
| F01_cb8564_c3624/f3p0/2790-1F  | CMGC_CDK-CRK7-CDK9  | PK |
| F01_cb8564_c3625/f1p0/2594-2F  | CMGC_CDK-CRK7-CDK9  | PK |
| F01_cb8564_c36449/f1p0/3556-0F | RLK-Pelle_LRR-XIIIb | PK |
| F01_cb8564_c36596/f2p0/2350-1F | RLK-Pelle_DLSV      | PK |
| F01_cb8564_c36775/f1p1/4614-0F | RLK-Pelle_DLSV      | PK |
| F01_cb8564_c36775/f1p1/4614-2F | RLK-Pelle_DLSV      | PK |
| F01_cb8564_c36940/f2p3/3069-2F | RLK-Pelle_CrRLK1L-1 | PK |
| F01_cb8564_c37008/f1p0/2404-2F | RLK-Pelle_DLSV      | PK |
| F01_cb8564_c37049/f1p0/3385-2F | RLK-Pelle_DLSV      | PK |
| F01_cb8564_c37079/f1p0/2659-0F | WNK_NRBP            | PK |
| F01_cb8564_c37163/f1p0/3147-0F | RLK-Pelle_CrRLK1L-1 | PK |
| F01_cb8564_c37163/f1p0/3147-2F | RLK-Pelle_CrRLK1L-1 | PK |
| F01_cb8564_c37274/f1p0/3183-0F | WNK_NRBP            | PK |
| F01_cb8564_c37325/f1p1/2512-0F | CMGC_GSK            | PK |
| F01_cb8564_c37492/f1p0/2985-0F | WNK_NRBP            | PK |

---

---

|                                |                     |    |
|--------------------------------|---------------------|----|
| F01_cb8564_c37571/f1p4/2881-1F | CMGC_GSK            | PK |
| F01_cb8564_c37604/f2p0/3150-0F | RLK-Pelle_CrRLK1L-1 | PK |
| F01_cb8564_c37604/f2p0/3150-1F | RLK-Pelle_CrRLK1L-1 | PK |
| F01_cb8564_c37666/f1p0/2149-0F | RLK-Pelle_DLSV      | PK |
| F01_cb8564_c37674/f1p0/2185-0F | RLK-Pelle_DLSV      | PK |
| F01_cb8564_c37674/f1p0/2185-2F | RLK-Pelle_DLSV      | PK |
| F01_cb8564_c37759/f1p2/4302-1F | RLK-Pelle_LysM      | PK |
| F01_cb8564_c38100/f3p0/3175-0F | RLK-Pelle_CrRLK1L-1 | PK |
| F01_cb8564_c38110/f1p0/4638-1F | RLK-Pelle_DLSV      | PK |
| F01_cb8564_c38178/f1p2/3019-0F | RLK-Pelle_CrRLK1L-1 | PK |
| F01_cb8564_c38178/f1p2/3019-1F | RLK-Pelle_CrRLK1L-1 | PK |
| F01_cb8564_c3837/f2p1/3505-1F  | RLK-Pelle_LRR-I-1   | PK |
| F01_cb8564_c3839/f1p0/3128-0F  | RLK-Pelle_LRR-I-1   | PK |
| F01_cb8564_c3839/f1p0/3128-2F  | RLK-Pelle_LRR-I-1   | PK |
| F01_cb8564_c3841/f1p0/3339-2F  | RLK-Pelle_LRR-I-1   | PK |
| F01_cb8564_c38491/f2p0/4386-1F | RLK-Pelle_DLSV      | PK |
| F01_cb8564_c38520/f1p0/3288-0F | RLK-Pelle_DLSV      | PK |
| F01_cb8564_c38653/f1p1/2281-2F | RLK-Pelle_DLSV      | PK |
| F01_cb8564_c38751/f1p0/3392-0F | RLK-Pelle_DLSV      | PK |
| F01_cb8564_c38815/f1p3/3473-1F | RLK-Pelle_LRR-XII-1 | PK |
| F01_cb8564_c38815/f1p3/3473-2F | RLK-Pelle_LRR-XII-1 | PK |
| F01_cb8564_c38880/f1p1/2687-1F | RLK-Pelle_CR4L      | PK |
| F01_cb8564_c38880/f1p1/2687-2F | RLK-Pelle_CrRLK1L-1 | PK |
| F01_cb8564_c39023/f1p0/2641-0F | RLK-Pelle_CrRLK1L-1 | PK |
| F01_cb8564_c39023/f1p0/2641-1F | RLK-Pelle_CrRLK1L-1 | PK |
| F01_cb8564_c39075/f1p0/2655-2F | RLK-Pelle_SD-2b     | PK |

---

---

|                                |                       |    |
|--------------------------------|-----------------------|----|
| F01_cb8564_c39637/f1p1/3015-2F | Group-Pl-3            | PK |
| F01_cb8564_c39796/f1p0/3998-0F | RLK-Pelle_CrRLK1L-1   | PK |
| F01_cb8564_c39796/f1p0/3998-1F | RLK-Pelle_RLCK-VIIa-2 | PK |
| F01_cb8564_c39852/f1p0/3673-0F | RLK-Pelle_RLCK-VIIa-2 | PK |
| F01_cb8564_c39852/f1p0/3673-1F | RLK-Pelle_CrRLK1L-1   | PK |
| F01_cb8564_c40026/f1p0/4751-1F | RLK-Pelle_LRR-XI-1    | PK |
| F01_cb8564_c40090/f1p0/3400-1F | RLK-Pelle_DLSV        | PK |
| F01_cb8564_c40090/f1p0/3400-2F | RLK-Pelle_DLSV        | PK |
| F01_cb8564_c40246/f1p1/2822-2F | RLK-Pelle_CrRLK1L-1   | PK |
| F01_cb8564_c40359/f1p0/2646-0F | RLK-Pelle_CrRLK1L-1   | PK |
| F01_cb8564_c40359/f1p0/2646-1F | RLK-Pelle_CrRLK1L-1   | PK |
| F01_cb8564_c40359/f1p0/2646-2F | RLK-Pelle_CrRLK1L-1   | PK |
| F01_cb8564_c40630/f1p0/2696-0F | RLK-Pelle_DLSV        | PK |
| F01_cb8564_c40630/f1p0/2696-2F | RLK-Pelle_DLSV        | PK |
| F01_cb8564_c40648/f1p0/3538-0F | RLK-Pelle_LRR-XI-1    | PK |
| F01_cb8564_c40820/f1p0/3230-0F | RLK-Pelle_DLSV        | PK |
| F01_cb8564_c40820/f1p0/3230-1F | RLK-Pelle_DLSV        | PK |
| F01_cb8564_c40874/f1p7/2355-2F | RLK-Pelle_LysM        | PK |
| F01_cb8564_c40930/f2p0/2663-2F | RLK-Pelle_SD-2b       | PK |
| F01_cb8564_c40939/f1p0/4508-1F | RLK-Pelle_CrRLK1L-1   | PK |
| F01_cb8564_c40939/f1p0/4508-2F | RLK-Pelle_CrRLK1L-1   | PK |
| F01_cb8564_c41128/f1p4/3076-1F | RLK-Pelle_CrRLK1L-1   | PK |
| F01_cb8564_c41169/f1p0/2809-0F | STE_STE11             | PK |
| F01_cb8564_c41286/f1p0/3500-0F | RLK-Pelle_DLSV        | PK |
| F01_cb8564_c41286/f1p0/3500-1F | RLK-Pelle_DLSV        | PK |
| F01_cb8564_c41286/f1p0/3500-2F | RLK-Pelle_DLSV        | PK |

---

---

|                                |                       |    |
|--------------------------------|-----------------------|----|
| F01_cb8564_c41565/f2p0/3288-0F | RLK-Pelle_DLSV        | PK |
| F01_cb8564_c41628/f1p0/1940-2F | TKL-PI-4              | PK |
| F01_cb8564_c41734/f1p0/2770-0F | RLK-Pelle_DLSV        | PK |
| F01_cb8564_c41734/f1p0/2770-2F | RLK-Pelle_DLSV        | PK |
| F01_cb8564_c41739/f1p0/3232-0F | RLK-Pelle_RLCK-VIIa-2 | PK |
| F01_cb8564_c4185/f1p1/2489-0F  | RLK-Pelle_SD-2b       | PK |
| F01_cb8564_c4186/f4p1/2803-1F  | RLK-Pelle_SD-2b       | PK |
| F01_cb8564_c4188/f1p0/2834-2F  | RLK-Pelle_SD-2b       | PK |
| F01_cb8564_c41895/f1p0/4142-1F | PEK_GCN2              | PK |
| F01_cb8564_c4190/f1p2/2940-1F  | CK1_CK1               | PK |
| F01_cb8564_c4193/f1p0/3949-2F  | CK1_CK1               | PK |
| F01_cb8564_c41939/f1p0/2349-0F | RLK-Pelle_DLSV        | PK |
| F01_cb8564_c4195/f1p1/2403-0F  | CK1_CK1               | PK |
| F01_cb8564_c42049/f1p0/4782-0F | RLK-Pelle_CrRLK1L-1   | PK |
| F01_cb8564_c42049/f1p0/4782-1F | RLK-Pelle_CrRLK1L-1   | PK |
| F01_cb8564_c42140/f1p1/3025-1F | RLK-Pelle_CrRLK1L-1   | PK |
| F01_cb8564_c42231/f6p7/2491-0F | RLK-Pelle_LysM        | PK |
| F01_cb8564_c42425/f1p1/3397-0F | RLK-Pelle_DLSV        | PK |
| F01_cb8564_c42602/f1p0/2704-2F | Group-PI-3            | PK |
| F01_cb8564_c42619/f1p0/3414-0F | RLK-Pelle_DLSV        | PK |
| F01_cb8564_c42619/f1p0/3414-1F | RLK-Pelle_DLSV        | PK |
| F01_cb8564_c42658/f1p0/2401-0F | Group-PI-3            | PK |
| F01_cb8564_c42658/f1p0/2401-2F | Group-PI-3            | PK |
| F01_cb8564_c42776/f1p0/2186-1F | WNK_NRBP              | PK |
| F01_cb8564_c42776/f1p0/2186-2F | WNK_NRBP              | PK |
| F01_cb8564_c42832/f1p1/3519-0F | RLK-Pelle_CrRLK1L-1   | PK |

---



---

|                                |                     |    |
|--------------------------------|---------------------|----|
| F01_cb8564_c42889/f3p0/2860-0F | RLK-Pelle_CrRLK1L-1 | PK |
| F01_cb8564_c42889/f3p0/2860-1F | RLK-Pelle_CrRLK1L-1 | PK |
| F01_cb8564_c42897/f4p0/2406-2F | RLK-Pelle_DLSV      | PK |
| F01_cb8564_c42961/f1p0/2560-1F | Group-Pl-3          | PK |
| F01_cb8564_c43017/f1p0/3517-1F | RLK-Pelle_DLSV      | PK |
| F01_cb8564_c43137/f1p0/2726-0F | WNK_NRBP            | PK |
| F01_cb8564_c43137/f1p0/2726-1F | WNK_NRBP            | PK |
| F01_cb8564_c43158/f1p0/4727-0F | RLK-Pelle_LRR-XI-1  | PK |
| F01_cb8564_c43158/f1p0/4727-1F | RLK-Pelle_LRR-XI-1  | PK |
| F01_cb8564_c43158/f1p0/4727-2F | RLK-Pelle_LRR-XI-1  | PK |
| F01_cb8564_c43180/f2p0/2641-0F | RLK-Pelle_SD-2b     | PK |
| F01_cb8564_c43212/f2p1/2417-1F | RLK-Pelle_DLSV      | PK |
| F01_cb8564_c43414/f1p0/3444-0F | RLK-Pelle_CrRLK1L-1 | PK |
| F01_cb8564_c43414/f1p0/3444-1F | RLK-Pelle_DLSV      | PK |
| F01_cb8564_c43414/f1p0/3444-2F | RLK-Pelle_DLSV      | PK |
| F01_cb8564_c43552/f1p0/3829-2F | RLK-Pelle_LRR-XI-1  | PK |
| F01_cb8564_c43730/f1p0/3179-0F | RLK-Pelle_DLSV      | PK |
| F01_cb8564_c43989/f1p0/2902-0F | RLK-Pelle_DLSV      | PK |
| F01_cb8564_c44004/f1p0/2796-0F | RLK-Pelle_CrRLK1L-1 | PK |
| F01_cb8564_c44004/f1p0/2796-1F | RLK-Pelle_CrRLK1L-1 | PK |
| F01_cb8564_c44035/f1p0/3142-1F | WNK_NRBP            | PK |
| F01_cb8564_c44035/f1p0/3142-2F | WNK_NRBP            | PK |
| F01_cb8564_c44206/f1p0/2835-1F | RLK-Pelle_DLSV      | PK |
| F01_cb8564_c44206/f1p0/2835-2F | RLK-Pelle_DLSV      | PK |
| F01_cb8564_c44323/f8p0/2622-0F | WNK_NRBP            | PK |
| F01_cb8564_c44514/f1p0/2728-0F | RLK-Pelle_DLSV      | PK |

---

---

|                                |                       |    |
|--------------------------------|-----------------------|----|
| F01_cb8564_c44514/f1p0/2728-2F | RLK-Pelle_DLSV        | PK |
| F01_cb8564_c4489/f1p0/2975-2F  | Group-PI-3            | PK |
| F01_cb8564_c44912/f1p1/2347-0F | RLK-Pelle_RLCK-XII-1  | PK |
| F01_cb8564_c44920/f1p0/3934-1F | WNK_NRBP              | PK |
| F01_cb8564_c45116/f1p0/2875-1F | RLK-Pelle_CrRLK1L-1   | PK |
| F01_cb8564_c45116/f1p0/2875-2F | RLK-Pelle_CrRLK1L-1   | PK |
| F01_cb8564_c45169/f1p0/3762-2F | RLK-Pelle_LRR-XI-1    | PK |
| F01_cb8564_c45229/f4p1/3393-0F | RLK-Pelle_DLSV        | PK |
| F01_cb8564_c45583/f1p0/3371-2F | RLK-Pelle_DLSV        | PK |
| F01_cb8564_c45651/f1p0/3090-0F | Aur                   | PK |
| F01_cb8564_c46081/f1p0/3421-1F | RLK-Pelle_DLSV        | PK |
| F01_cb8564_c46200/f1p0/3185-1F | RLK-Pelle_DLSV        | PK |
| F01_cb8564_c46301/f1p3/3891-0F | RLK-Pelle_LysM        | PK |
| F01_cb8564_c46333/f1p1/2412-1F | RLK-Pelle_DLSV        | PK |
| F01_cb8564_c46446/f1p0/2736-0F | RLK-Pelle_CrRLK1L-1   | PK |
| F01_cb8564_c46749/f1p0/4497-2F | CMGC_GSK              | PK |
| F01_cb8564_c46860/f1p0/4047-2F | RLK-Pelle_DLSV        | PK |
| F01_cb8564_c46876/f1p0/4486-1F | RLK-Pelle_DLSV        | PK |
| F01_cb8564_c46993/f1p0/4177-1F | RLK-Pelle_DLSV        | PK |
| F01_cb8564_c47124/f1p0/4568-2F | RLK-Pelle_CrRLK1L-1   | PK |
| F01_cb8564_c47139/f1p2/4516-0F | RLK-Pelle_CrRLK1L-1   | PK |
| F01_cb8564_c47149/f1p1/2601-0F | RLK-Pelle_RLCK-VIIa-2 | PK |
| F01_cb8564_c47149/f1p1/2601-1F | RLK-Pelle_CrRLK1L-1   | PK |
| F01_cb8564_c47331/f1p0/2588-1F | WNK_NRBP              | PK |
| F01_cb8564_c47558/f1p0/1918-2F | RLK-Pelle_RLCK-VIII   | PK |
| F01_cb8564_c47567/f1p0/3302-0F | RLK-Pelle_CrRLK1L-1   | PK |

---

---

|                                |                     |    |
|--------------------------------|---------------------|----|
| F01_cb8564_c47634/f2p1/3095-0F | RLK-Pelle_CrRLK1L-1 | PK |
| F01_cb8564_c47634/f2p1/3095-2F | RLK-Pelle_CrRLK1L-1 | PK |
| F01_cb8564_c47662/f1p0/2984-0F | RLK-Pelle_SD-2b     | PK |
| F01_cb8564_c47713/f1p0/4233-1F | RLK-Pelle_CrRLK1L-1 | PK |
| F01_cb8564_c47741/f2p0/2569-0F | RLK-Pelle_DLSV      | PK |
| F01_cb8564_c47741/f2p0/2569-1F | RLK-Pelle_DLSV      | PK |
| F01_cb8564_c47783/f1p0/2418-2F | RLK-Pelle_DLSV      | PK |
| F01_cb8564_c47929/f1p0/3443-1F | RLK-Pelle_DLSV      | PK |
| F01_cb8564_c47929/f1p0/3443-2F | RLK-Pelle_DLSV      | PK |
| F01_cb8564_c47930/f1p0/3019-2F | NAK                 | PK |
| F01_cb8564_c47960/f1p1/4330-0F | RLK-Pelle_LRR-XI-1  | PK |
| F01_cb8564_c47960/f1p1/4330-2F | RLK-Pelle_LRR-XI-1  | PK |
| F01_cb8564_c48054/f1p0/2834-2F | RLK-Pelle_DLSV      | PK |
| F01_cb8564_c48056/f1p1/3301-0F | WNK_NRBP            | PK |
| F01_cb8564_c48056/f1p1/3301-1F | WNK_NRBP            | PK |
| F01_cb8564_c48168/f1p0/4168-0F | RLK-Pelle_LRR-XI-1  | PK |
| F01_cb8564_c48168/f1p0/4168-1F | RLK-Pelle_LRR-XI-1  | PK |
| F01_cb8564_c48282/f1p0/2709-0F | WNK_NRBP            | PK |
| F01_cb8564_c48293/f1p0/3428-0F | CMGC_GSK            | PK |
| F01_cb8564_c48445/f1p2/3004-2F | RLK-Pelle_CrRLK1L-1 | PK |
| F01_cb8564_c48449/f1p0/2775-0F | CMGC_CDK-CRK7-CDK9  | PK |
| F01_cb8564_c48449/f1p0/2775-2F | CMGC_CDK-CRK7-CDK9  | PK |
| F01_cb8564_c48538/f1p0/2599-2F | WNK_NRBP            | PK |
| F01_cb8564_c48551/f1p0/2454-0F | WNK_NRBP            | PK |
| F01_cb8564_c48551/f1p0/2454-2F | WNK_NRBP            | PK |
| F01_cb8564_c48563/f1p0/3640-1F | WNK_NRBP            | PK |

---

---

|                                |                       |    |
|--------------------------------|-----------------------|----|
| F01_cb8564_c48607/f1p0/4177-0F | RLK-Pelle_DLSV        | PK |
| F01_cb8564_c48634/f1p0/3498-2F | RLK-Pelle_DLSV        | PK |
| F01_cb8564_c48742/f1p1/3198-1F | RLK-Pelle_RLCK-VIII   | PK |
| F01_cb8564_c48990/f1p2/2740-0F | RLK-Pelle_LysM        | PK |
| F01_cb8564_c4912/f1p0/3121-1F  | TKL_CTRL1-DRK-2       | PK |
| F01_cb8564_c49125/f1p0/2935-2F | RLK-Pelle_DLSV        | PK |
| F01_cb8564_c4914/f4p0/3012-0F  | TKL_CTRL1-DRK-2       | PK |
| F01_cb8564_c4915/f1p0/3082-1F  | TKL_CTRL1-DRK-2       | PK |
| F01_cb8564_c4916/f1p0/2816-0F  | TKL_CTRL1-DRK-2       | PK |
| F01_cb8564_c4916/f1p0/2816-1F  | TKL_CTRL1-DRK-2       | PK |
| F01_cb8564_c4917/f1p0/2766-0F  | TKL_CTRL1-DRK-2       | PK |
| F01_cb8564_c4917/f1p0/2766-2F  | TKL_CTRL1-DRK-2       | PK |
| F01_cb8564_c49236/f1p1/2666-1F | RLK-Pelle_PERK-1      | PK |
| F01_cb8564_c49291/f1p0/2164-0F | WNK_NRBP              | PK |
| F01_cb8564_c49294/f1p0/4356-0F | RLK-Pelle_DLSV        | PK |
| F01_cb8564_c49294/f1p0/4356-2F | RLK-Pelle_DLSV        | PK |
| F01_cb8564_c49592/f1p0/2266-2F | RLK-Pelle_DLSV        | PK |
| F01_cb8564_c49617/f1p0/3794-2F | RLK-Pelle_LRR-XI-1    | PK |
| F01_cb8564_c49729/f1p0/2870-2F | RLK-Pelle_RLCK-VIIa-2 | PK |
| F01_cb8564_c49738/f1p0/3667-2F | RLK-Pelle_DLSV        | PK |
| F01_cb8564_c50086/f1p0/3752-1F | RLK-Pelle_CrRLK1L-1   | PK |
| F01_cb8564_c50086/f1p0/3752-2F | RLK-Pelle_CrRLK1L-1   | PK |
| F01_cb8564_c50118/f1p0/2385-2F | CAMK_CAMKL-CHK1       | PK |
| F01_cb8564_c50226/f1p0/3953-2F | CMGC_GSK              | PK |
| F01_cb8564_c50450/f9p1/4363-1F | RLK-Pelle_RLCK-VIIa-2 | PK |
| F01_cb8564_c50706/f1p0/4300-0F | Group-PI-3            | PK |

---

---

|                                |                     |    |
|--------------------------------|---------------------|----|
| F01_cb8564_c50706/f1p0/4300-1F | Group-Pl-3          | PK |
| F01_cb8564_c50777/f1p0/2798-0F | RLK-Pelle_DLSV      | PK |
| F01_cb8564_c50777/f1p0/2798-1F | RLK-Pelle_DLSV      | PK |
| F01_cb8564_c51098/f1p0/2821-1F | RLK-Pelle_DLSV      | PK |
| F01_cb8564_c51098/f1p0/2821-2F | RLK-Pelle_DLSV      | PK |
| F01_cb8564_c511/f5p0/1943-0F   | CAMK_CAMKL-CHK1     | PK |
| F01_cb8564_c51208/f1p0/3009-1F | RLK-Pelle_CrRLK1L-1 | PK |
| F01_cb8564_c51208/f1p0/3009-2F | RLK-Pelle_CrRLK1L-1 | PK |
| F01_cb8564_c51244/f1p0/2997-2F | RLK-Pelle_DLSV      | PK |
| F01_cb8564_c51399/f1p0/1945-2F | TKL-Pl-4            | PK |
| F01_cb8564_c51492/f1p0/3591-0F | RLK-Pelle_CrRLK1L-1 | PK |
| F01_cb8564_c51492/f1p0/3591-1F | RLK-Pelle_DLSV      | PK |
| F01_cb8564_c51593/f1p0/4707-1F | RLK-Pelle_DLSV      | PK |
| F01_cb8564_c51647/f1p0/2214-1F | RLK-Pelle_DLSV      | PK |
| F01_cb8564_c51648/f1p0/4091-0F | RLK-Pelle_CrRLK1L-1 | PK |
| F01_cb8564_c51718/f1p0/3732-0F | RLK-Pelle_DLSV      | PK |
| F01_cb8564_c5192/f1p0/2669-0F  | RLK-Pelle_DLSV      | PK |
| F01_cb8564_c5192/f1p0/2669-2F  | RLK-Pelle_DLSV      | PK |
| F01_cb8564_c5193/f1p0/2677-2F  | RLK-Pelle_DLSV      | PK |
| F01_cb8564_c5195/f1p0/2262-0F  | RLK-Pelle_DLSV      | PK |
| F01_cb8564_c5195/f1p0/2262-1F  | RLK-Pelle_DLSV      | PK |
| F01_cb8564_c5195/f1p0/2262-2F  | RLK-Pelle_DLSV      | PK |
| F01_cb8564_c5196/f1p1/2290-0F  | RLK-Pelle_DLSV      | PK |
| F01_cb8564_c51979/f1p0/2022-2F | RLK-Pelle_DLSV      | PK |
| F01_cb8564_c52018/f1p0/2577-2F | RLK-Pelle_DLSV      | PK |
| F01_cb8564_c52041/f1p0/2522-0R | RLK-Pelle_PERK-1    | PK |

---

---

|                                |                       |    |
|--------------------------------|-----------------------|----|
| F01_cb8564_c52175/f1p3/3008-1F | RLK-Pelle_CrRLK1L-1   | PK |
| F01_cb8564_c52175/f1p3/3008-2F | RLK-Pelle_CrRLK1L-1   | PK |
| F01_cb8564_c52273/f1p0/2352-1F | RLK-Pelle_DLSV        | PK |
| F01_cb8564_c52273/f1p0/2352-2F | RLK-Pelle_DLSV        | PK |
| F01_cb8564_c52297/f1p0/1962-1F | Group-PI-4            | PK |
| F01_cb8564_c52388/f1p0/4989-0F | RLK-Pelle_DLSV        | PK |
| F01_cb8564_c52388/f1p0/4989-1F | RLK-Pelle_DLSV        | PK |
| F01_cb8564_c52388/f1p0/4989-2F | RLK-Pelle_DLSV        | PK |
| F01_cb8564_c52477/f1p0/3241-2F | RLK-Pelle_DLSV        | PK |
| F01_cb8564_c52539/f1p1/3441-0F | RLK-Pelle_CrRLK1L-1   | PK |
| F01_cb8564_c52539/f1p1/3441-1F | RLK-Pelle_CrRLK1L-1   | PK |
| F01_cb8564_c5271/f1p0/3205-0F  | RLK-Pelle_DLSV        | PK |
| F01_cb8564_c5272/f2p0/3163-1F  | RLK-Pelle_DLSV        | PK |
| F01_cb8564_c5272/f2p0/3163-2F  | RLK-Pelle_DLSV        | PK |
| F01_cb8564_c52735/f1p0/3300-0F | RLK-Pelle_DLSV        | PK |
| F01_cb8564_c52735/f1p0/3300-2F | RLK-Pelle_DLSV        | PK |
| F01_cb8564_c52784/f1p1/2879-0F | RLK-Pelle_CrRLK1L-1   | PK |
| F01_cb8564_c52784/f1p1/2879-2F | RLK-Pelle_CrRLK1L-1   | PK |
| F01_cb8564_c52794/f1p0/1938-0F | TKL-PI-4              | PK |
| F01_cb8564_c52863/f1p0/2866-1F | RLK-Pelle_DLSV        | PK |
| F01_cb8564_c53087/f1p0/2677-0F | RLK-Pelle_RLCK-VIIa-2 | PK |
| F01_cb8564_c53087/f1p0/2677-2F | RLK-Pelle_CrRLK1L-1   | PK |
| F01_cb8564_c53152/f1p0/2729-0F | RLK-Pelle_DLSV        | PK |
| F01_cb8564_c53152/f1p0/2729-2F | RLK-Pelle_DLSV        | PK |
| F01_cb8564_c53289/f1p0/3265-2F | WNK_NRBP              | PK |
| F01_cb8564_c53446/f1p1/3081-0F | RLK-Pelle_DLSV        | PK |

---

---

|                                 |                       |    |
|---------------------------------|-----------------------|----|
| F01_cb8564_c53561/f1p0/2359-1F  | WNK_NRBP              | PK |
| F01_cb8564_c53561/f1p0/2359-2F  | WNK_NRBP              | PK |
| F01_cb8564_c53758/f1p0/2784-1F  | RLK-Pelle_SD-2b       | PK |
| F01_cb8564_c53916/f1p0/2590-0F  | Group-PI-3            | PK |
| F01_cb8564_c53916/f1p0/2590-2F  | Group-PI-3            | PK |
| F01_cb8564_c53960/f1p0/2993-0F  | RLK-Pelle_CrRLK1L-1   | PK |
| F01_cb8564_c53960/f1p0/2993-1F  | RLK-Pelle_CrRLK1L-1   | PK |
| F01_cb8564_c53960/f1p0/2993-2F  | RLK-Pelle_CrRLK1L-1   | PK |
| F01_cb8564_c54171/f1p0/3438-0F  | RLK-Pelle_RLCK-VI     | PK |
| F01_cb8564_c54206/f2p0/3081-2F  | RLK-Pelle_DLSV        | PK |
| F01_cb8564_c543/f5p1/3002-2F    | RLK-Pelle_LRR-XI-1    | PK |
| F01_cb8564_c54369/f1p0/3902-1F  | RLK-Pelle_DLSV        | PK |
| F01_cb8564_c54486/f1p0/2881-0F  | RLK-Pelle_DLSV        | PK |
| F01_cb8564_c54518/f1p0/2781-0F  | RLK-Pelle_CrRLK1L-1   | PK |
| F01_cb8564_c54518/f1p0/2781-2F  | RLK-Pelle_CrRLK1L-1   | PK |
| F01_cb8564_c58034/f2p2/3989-1F  | CMGC_CDK-PITSLRE      | PK |
| F01_cb8564_c620/f4p0/2539-1F    | RLK-Pelle_LRR-Xa      | PK |
| F01_cb8564_c65564/f1p0/2521-1F  | RLK-Pelle_DLSV        | PK |
| F01_cb8564_c66088/f4p1/4083-1F  | RLK-Pelle_RLCK-VIIa-2 | PK |
| F01_cb8564_c66088/f4p1/4083-2F  | RLK-Pelle_CrRLK1L-1   | PK |
| F01_cb8564_c66757/f6p0/2263-2F  | Group-PI-4            | PK |
| F01_cb8564_c66813/f6p0/2579-0F  | RLK-Pelle_DLSV        | PK |
| F01_cb8564_c66877/f3p0/2938-1F  | WNK_NRBP              | PK |
| F01_cb8564_c67321/f1p0/2299-0F  | RLK-Pelle_PERK-1      | PK |
| F01_cb8564_c67635/f10p0/2139-2F | RLK-Pelle_LysM        | PK |
| F01_cb8564_c68144/f9p2/2568-0F  | RLK-Pelle_LRR-II      | PK |

---

---

|                                |                        |    |
|--------------------------------|------------------------|----|
| F01_cb8564_c68304/f3p0/3488-0F | RLK-Pelle_DLSV         | PK |
| F01_cb8564_c68314/f3p1/1908-0F | CAMK_CDPK              | PK |
| F01_cb8564_c68442/f4p2/1923-2F | CAMK_CDPK              | PK |
| F01_cb8564_c68572/f7p0/3021-2F | RLK-Pelle_LRR-II       | PK |
| F01_cb8564_c68629/f9p0/2229-0F | CMGC_SRPK              | PK |
| F01_cb8564_c68638/f4p1/2882-2F | RLK-Pelle_RLCK-VI      | PK |
| F01_cb8564_c68654/f5p1/2121-2F | CAMK_AMPK              | PK |
| F01_cb8564_c68715/f3p0/3175-0F | RLK-Pelle_LRR-XIIIb    | PK |
| F01_cb8564_c68749/f3p0/3289-2F | RLK-Pelle_DLSV         | PK |
| F01_cb8564_c68921/f2p2/2973-2F | RLK-Pelle_SD-2b        | PK |
| F01_cb8564_c68990/f2p1/2891-2F | RLK-Pelle_CrRLK1L-1    | PK |
| F01_cb8564_c69015/f2p0/2135-0F | RLK-Pelle_SD-2b        | PK |
| F01_cb8564_c69017/f3p0/3411-0F | RLK-Pelle_DLSV         | PK |
| F01_cb8564_c69017/f3p0/3411-1F | RLK-Pelle_DLSV         | PK |
| F01_cb8564_c69097/f2p0/2364-1F | TKL_CTR1-DRK-2         | PK |
| F01_cb8564_c69213/f1p2/1856-0F | CAMK_CAMKL-CHEK1       | PK |
| F01_cb8564_c69227/f2p3/3025-1F | RLK-Pelle_CrRLK1L-1    | PK |
| F01_cb8564_c69227/f2p3/3025-2F | RLK-Pelle_CrRLK1L-1    | PK |
| F01_cb8564_c69241/f3p0/2222-1F | RLK-Pelle_LRK10L-2     | PK |
| F01_cb8564_c69266/f2p0/3325-0F | RLK-Pelle_DLSV         | PK |
| F01_cb8564_c69277/f3p1/2291-0F | RLK-Pelle_LRK10L-2     | PK |
| F01_cb8564_c69289/f1p1/3510-0F | RLK-Pelle_DLSV         | PK |
| F01_cb8564_c69289/f1p1/3510-1F | RLK-Pelle_DLSV         | PK |
| F01_cb8564_c69358/f4p1/2369-0F | RLK-Pelle_WAK_LRK10L-1 | PK |
| F01_cb8564_c69366/f5p4/2938-1F | CK1_CK1-PI             | PK |
| F01_cb8564_c69550/f1p0/2630-2F | RLK-Pelle_DLSV         | PK |

---



---

|                                |                     |    |
|--------------------------------|---------------------|----|
| F01_cb8564_c69852/f1p0/2513-0F | RLK-Pelle_DLSV      | PK |
| F01_cb8564_c69874/f1p0/3374-0R | RLK-Pelle_SD-2b     | PK |
| F01_cb8564_c69874/f1p0/3374-1F | RLK-Pelle_SD-2b     | PK |
| F01_cb8564_c69913/f2p1/3530-1F | RLK-Pelle_DLSV      | PK |
| F01_cb8564_c69925/f1p1/2234-0F | RLK-Pelle_LysM      | PK |
| F01_cb8564_c69946/f1p0/3776-2F | RLK-Pelle_DLSV      | PK |
| F01_cb8564_c70015/f1p0/2936-1F | WNK_NRBP            | PK |
| F01_cb8564_c70068/f1p0/3324-0F | WNK_NRBP            | PK |
| F01_cb8564_c70068/f1p0/3324-2F | WNK_NRBP            | PK |
| F01_cb8564_c70073/f1p0/3142-1F | RLK-Pelle_CrRLK1L-1 | PK |
| F01_cb8564_c70101/f1p0/2241-0F | CK1_CK1-PI          | PK |
| F01_cb8564_c70118/f1p0/2047-1F | RLK-Pelle_LysM      | PK |
| F01_cb8564_c70118/f1p0/2047-2F | RLK-Pelle_LysM      | PK |
| F01_cb8564_c70307/f2p0/3222-2F | RLK-Pelle_DLSV      | PK |
| F01_cb8564_c70533/f1p0/2295-0F | RLK-Pelle_RLCK-VI   | PK |
| F01_cb8564_c70533/f1p0/2295-2F | RLK-Pelle_RLCK-VI   | PK |
| F01_cb8564_c70578/f1p1/3120-1F | RLK-Pelle_DLSV      | PK |
| F01_cb8564_c70704/f1p0/3537-0F | CAMK_AMPK           | PK |
| F01_cb8564_c70704/f1p0/3537-1F | CAMK_AMPK           | PK |
| F01_cb8564_c70801/f1p0/2684-0F | RLK-Pelle_LRR-II    | PK |
| F01_cb8564_c70819/f1p1/4129-2F | RLK-Pelle_DLSV      | PK |
| F01_cb8564_c70831/f1p0/3329-0F | RLK-Pelle_DLSV      | PK |
| F01_cb8564_c70831/f1p0/3329-2F | RLK-Pelle_DLSV      | PK |
| F01_cb8564_c70927/f1p0/4372-0F | RLK-Pelle_DLSV      | PK |
| F01_cb8564_c71054/f1p0/3048-1F | Group-Pl-3          | PK |
| F01_cb8564_c71076/f1p2/2391-0F | RLK-Pelle_RLCK-VI   | PK |

---

---

|                                |                       |    |
|--------------------------------|-----------------------|----|
| F01_cb8564_c71216/f1p0/2088-2F | CK1_CK1-PI            | PK |
| F01_cb8564_c71239/f1p0/3090-0F | WNK_NRBP              | PK |
| F01_cb8564_c71331/f1p0/1900-0F | RLK-Pelle_LysM        | PK |
| F01_cb8564_c71369/f1p0/2592-0F | NAK                   | PK |
| F01_cb8564_c71369/f1p0/2592-2F | NAK                   | PK |
| F01_cb8564_c71390/f1p0/3703-1F | RLK-Pelle_RLCK-VIII   | PK |
| F01_cb8564_c71404/f1p0/3980-0F | RLK-Pelle_DLSV        | PK |
| F01_cb8564_c71404/f1p0/3980-2F | RLK-Pelle_DLSV        | PK |
| F01_cb8564_c71546/f1p2/1919-2F | CAMK_CAMKL-CHK1       | PK |
| F01_cb8564_c71564/f1p0/2695-2F | NAK                   | PK |
| F01_cb8564_c71618/f1p1/3399-0F | RLK-Pelle_DLSV        | PK |
| F01_cb8564_c71716/f1p0/3226-1F | CMGC_CDK-PITSLRE      | PK |
| F01_cb8564_c71717/f1p0/1993-0F | RLK-Pelle_RLCK-XII-1  | PK |
| F01_cb8564_c71742/f1p0/2675-2F | WNK_NRBP              | PK |
| F01_cb8564_c71747/f1p1/2679-0F | RLK-Pelle_CrRLK1L-1   | PK |
| F01_cb8564_c71747/f1p1/2679-2F | RLK-Pelle_CrRLK1L-1   | PK |
| F01_cb8564_c71888/f1p1/4007-1F | RLK-Pelle_LysM        | PK |
| F01_cb8564_c71897/f1p1/2487-0F | RLK-Pelle_RLCK-VIIa-2 | PK |
| F01_cb8564_c71983/f1p0/2471-2F | NAK                   | PK |
| F01_cb8564_c72004/f2p0/2684-0F | RLK-Pelle_CrRLK1L-1   | PK |
| F01_cb8564_c72004/f2p0/2684-1F | RLK-Pelle_CrRLK1L-1   | PK |
| F01_cb8564_c72104/f1p0/2102-1F | RLK-Pelle_RLCK-XII-1  | PK |
| F01_cb8564_c72110/f1p0/3310-2F | RLK-Pelle_DLSV        | PK |
| F01_cb8564_c72121/f1p0/3290-0F | RLK-Pelle_DLSV        | PK |
| F01_cb8564_c72121/f1p0/3290-1F | RLK-Pelle_DLSV        | PK |
| F01_cb8564_c72294/f1p1/3519-0F | RLK-Pelle_DLSV        | PK |

---

---

|                                |                        |    |
|--------------------------------|------------------------|----|
| F01_cb8564_c72303/f1p0/2684-0F | RLK-Pelle_WAK_LRK10L-1 | PK |
| F01_cb8564_c72497/f1p0/2108-2F | RLK-Pelle_LRK10L-2     | PK |
| F01_cb8564_c72545/f1p0/3448-2F | RLK-Pelle_LRR-XI-1     | PK |
| F01_cb8564_c72575/f1p0/1900-1F | RLK-Pelle_RLCK-VIII    | PK |
| F01_cb8564_c72575/f1p0/1900-2F | RLK-Pelle_RLCK-VIII    | PK |
| F01_cb8564_c72702/f1p0/4583-0F | CAMK_AMPK              | PK |
| F01_cb8564_c72702/f1p0/4583-1F | CAMK_AMPK              | PK |
| F01_cb8564_c72739/f1p0/3265-0F | WNK_NRBP               | PK |
| F01_cb8564_c72739/f1p0/3265-1F | WNK_NRBP               | PK |
| F01_cb8564_c72782/f1p0/2689-1F | RLK-Pelle_LRR-II       | PK |
| F01_cb8564_c72832/f1p1/2918-1F | RLK-Pelle_WAK_LRK10L-1 | PK |
| F01_cb8564_c72832/f1p1/2918-2F | RLK-Pelle_WAK_LRK10L-1 | PK |
| F01_cb8564_c73009/f1p1/4319-2F | RLK-Pelle_DLSV         | PK |
| F01_cb8564_c73112/f1p0/3584-0F | RLK-Pelle_SD-2b        | PK |
| F01_cb8564_c73167/f1p0/3510-2F | RLK-Pelle_DLSV         | PK |
| F01_cb8564_c73260/f1p0/3860-2F | RLK-Pelle_RLCK-XII-1   | PK |
| F01_cb8564_c73284/f1p0/3111-0F | RLK-Pelle_DLSV         | PK |
| F01_cb8564_c73328/f1p0/3197-0F | RLK-Pelle_DLSV         | PK |
| F01_cb8564_c73385/f1p0/1981-0F | CAMK_CAMKL-CHK1        | PK |
| F01_cb8564_c73565/f1p0/2797-0F | RLK-Pelle_DLSV         | PK |
| F01_cb8564_c73773/f1p1/3465-0F | RLK-Pelle_DLSV         | PK |
| F01_cb8564_c73794/f1p1/3512-1F | RLK-Pelle_RLCK-VI      | PK |
| F01_cb8564_c73794/f1p1/3512-2F | RLK-Pelle_RLCK-VI      | PK |
| F01_cb8564_c73801/f1p0/2858-2F | CK1_CK1                | PK |
| F01_cb8564_c73802/f1p0/2498-0F | RLK-Pelle_DLSV         | PK |
| F01_cb8564_c73802/f1p0/2498-1F | RLK-Pelle_DLSV         | PK |

---

---

|                                |                        |    |
|--------------------------------|------------------------|----|
| F01_cb8564_c73811/f1p1/3283-1F | RLK-Pelle_LRR-II       | PK |
| F01_cb8564_c73912/f1p0/3538-0F | RLK-Pelle_DLSV         | PK |
| F01_cb8564_c73912/f1p0/3538-1F | RLK-Pelle_DLSV         | PK |
| F01_cb8564_c74067/f1p0/3829-0F | CAMK_AMPK              | PK |
| F01_cb8564_c74067/f1p0/3829-1F | CAMK_AMPK              | PK |
| F01_cb8564_c74097/f1p1/3703-0F | RLK-Pelle_DLSV         | PK |
| F01_cb8564_c74286/f1p0/2484-1F | RLK-Pelle_DLSV         | PK |
| F01_cb8564_c74523/f1p0/2103-2F | RLK-Pelle_LRR-XI-1     | PK |
| F01_cb8564_c74576/f1p0/4386-0F | RLK-Pelle_DLSV         | PK |
| F01_cb8564_c74576/f1p0/4386-2F | RLK-Pelle_DLSV         | PK |
| F01_cb8564_c74652/f1p0/2680-2F | RLK-Pelle_LRR-II       | PK |
| F01_cb8564_c74798/f1p1/2116-0F | RLK-Pelle_WAK_LRK10L-1 | PK |
| F01_cb8564_c74926/f1p0/2151-1F | RLK-Pelle_CrRLK1L-1    | PK |
| F01_cb8564_c75095/f1p1/2355-2F | RLK-Pelle_LysM         | PK |
| F01_cb8564_c75190/f6p0/3003-2F | RLK-Pelle_CrRLK1L-1    | PK |
| F01_cb8564_c75256/f1p0/2082-1F | RLK-Pelle_RLCK-XII-1   | PK |
| F01_cb8564_c75276/f1p0/3372-2F | RLK-Pelle_LRR-IX       | PK |
| F01_cb8564_c75291/f1p0/3859-1F | RLK-Pelle_LysM         | PK |
| F01_cb8564_c75291/f1p0/3859-2F | RLK-Pelle_LysM         | PK |
| F01_cb8564_c75378/f1p0/2685-1F | RLK-Pelle_LRR-XI-1     | PK |
| F01_cb8564_c75378/f1p0/2685-2F | RLK-Pelle_LRR-XI-1     | PK |
| F01_cb8564_c755/f2p0/3389-0F   | RLK-Pelle_LRR-XI-1     | PK |
| F01_cb8564_c75505/f1p0/2250-0F | RLK-Pelle_WAK_LRK10L-1 | PK |
| F01_cb8564_c75607/f1p0/2841-0F | CK1_CK1-PI             | PK |
| F01_cb8564_c75684/f1p0/2133-0F | RLK-Pelle_SD-2b        | PK |
| F01_cb8564_c75765/f1p0/3629-0F | RLK-Pelle_LRR-XII-1    | PK |

---

---

|                                |                        |    |
|--------------------------------|------------------------|----|
| F01_cb8564_c75852/f1p0/3326-0F | RLK-Pelle_DLSV         | PK |
| F01_cb8564_c75852/f1p0/3326-2F | RLK-Pelle_DLSV         | PK |
| F01_cb8564_c75864/f1p0/1902-1F | RLK-Pelle_LysM         | PK |
| F01_cb8564_c75876/f2p0/2376-0F | RLK-Pelle_LysM         | PK |
| F01_cb8564_c75933/f1p0/2952-0F | WNK_NRBP               | PK |
| F01_cb8564_c75933/f1p0/2952-2F | WNK_NRBP               | PK |
| F01_cb8564_c75961/f4p0/3591-0F | RLK-Pelle_LRR-XIIIb    | PK |
| F01_cb8564_c76001/f1p0/3083-1F | RLK-Pelle_LysM         | PK |
| F01_cb8564_c76043/f2p0/2731-2F | CAMK_CDPK              | PK |
| F01_cb8564_c76051/f1p0/2091-0F | RLK-Pelle_SD-2b        | PK |
| F01_cb8564_c76051/f1p0/2091-1F | RLK-Pelle_SD-2b        | PK |
| F01_cb8564_c76143/f1p0/3097-0F | RLK-Pelle_DLSV         | PK |
| F01_cb8564_c76149/f2p8/2118-1F | CAMK_CAMKL-CHK1        | PK |
| F01_cb8564_c76305/f1p0/2353-1F | CMGC_SRPK              | PK |
| F01_cb8564_c76390/f1p1/2940-2F | RLK-Pelle_RLCK-VIIa-2  | PK |
| F01_cb8564_c76490/f3p1/3602-2F | RLK-Pelle_DLSV         | PK |
| F01_cb8564_c76505/f1p1/2102-0F | RLK-Pelle_WAK_LRK10L-1 | PK |
| F01_cb8564_c76505/f1p1/2102-1F | RLK-Pelle_WAK_LRK10L-1 | PK |
| F01_cb8564_c76505/f1p1/2102-2F | RLK-Pelle_WAK_LRK10L-1 | PK |
| F01_cb8564_c76562/f1p1/4711-0F | RLK-Pelle_DLSV         | PK |
| F01_cb8564_c76756/f1p1/3429-2F | RLK-Pelle_RLCK-VI      | PK |
| F01_cb8564_c76929/f1p0/2420-0F | RLK-Pelle_DLSV         | PK |
| F01_cb8564_c76946/f4p0/2069-0F | RLK-Pelle_LRR-XI-1     | PK |
| F01_cb8564_c7697/f20p4/2318-1F | CK1_CK1                | PK |
| F01_cb8564_c770/f2p0/2459-1F   | RLK-Pelle_LRR-XI-1     | PK |
| F01_cb8564_c77097/f1p0/3052-0F | RLK-Pelle_DLSV         | PK |

---

---

|                                |                       |    |
|--------------------------------|-----------------------|----|
| F01_cb8564_c77176/f1p0/3311-2F | RLK-Pelle_DLSV        | PK |
| F01_cb8564_c77182/f1p0/2215-2F | CAMK_CAMKL-CHK1       | PK |
| F01_cb8564_c77203/f2p0/2820-1F | RLK-Pelle_CrRLK1L-1   | PK |
| F01_cb8564_c77211/f1p0/2910-0F | RLK-Pelle_RLCK-XII-1  | PK |
| F01_cb8564_c77380/f2p0/3010-1F | WNK_NRBP              | PK |
| F01_cb8564_c77380/f2p0/3010-2F | WNK_NRBP              | PK |
| F01_cb8564_c77412/f1p0/4476-2F | RLK-Pelle_LRR-II      | PK |
| F01_cb8564_c7742/f7p1/2556-1F  | RLK-Pelle_LRR-Xa      | PK |
| F01_cb8564_c7761/f6p0/2830-2F  | CMGC_MAPK             | PK |
| F01_cb8564_c7763/f11p0/3077-1F | TKL_CTR1-DRK-2        | PK |
| F01_cb8564_c77679/f1p0/2688-2F | WNK_NRBP              | PK |
| F01_cb8564_c77775/f1p0/3843-1F | RLK-Pelle_DLSV        | PK |
| F01_cb8564_c7780/f7p0/3197-0F  | CMGC_MAPK             | PK |
| F01_cb8564_c779/f2p0/2583-1F   | RLK-Pelle_LRR-IV      | PK |
| F01_cb8564_c77901/f1p0/3053-1F | RLK-Pelle_CrRLK1L-1   | PK |
| F01_cb8564_c77903/f1p1/4534-1F | RLK-Pelle_DLSV        | PK |
| F01_cb8564_c77903/f1p1/4534-2F | RLK-Pelle_WAK         | PK |
| F01_cb8564_c78054/f1p0/2071-1F | RLK-Pelle_LRK10L-2    | PK |
| F01_cb8564_c78131/f1p0/3256-0F | RLK-Pelle_DLSV        | PK |
| F01_cb8564_c78131/f1p0/3256-2F | RLK-Pelle_DLSV        | PK |
| F01_cb8564_c78195/f6p2/2734-1F | RLK-Pelle_LRR-VI-2    | PK |
| F01_cb8564_c78426/f1p0/3753-2F | RLK-Pelle_DLSV        | PK |
| F01_cb8564_c78429/f1p0/3306-2F | RLK-Pelle_DLSV        | PK |
| F01_cb8564_c78459/f1p0/1902-1F | CAMK_AMPK             | PK |
| F01_cb8564_c7851/f2p0/2741-0R  | RLK-Pelle_RLCK-VIIa-1 | PK |
| F01_cb8564_c7851/f2p0/2741-2R  | RLK-Pelle_RLCK-VIIa-1 | PK |

---

---

|                                 |                     |    |
|---------------------------------|---------------------|----|
| F01_cb8564_c78527/f1p0/3048-0F  | RLK-Pelle_LRR-II    | PK |
| F01_cb8564_c78606/f1p0/3454-2F  | RLK-Pelle_DLSV      | PK |
| F01_cb8564_c78701/f2p2/2927-0F  | RLK-Pelle_CrRLK1L-1 | PK |
| F01_cb8564_c78848/f1p0/2925-1F  | RLK-Pelle_SD-2b     | PK |
| F01_cb8564_c78992/f1p0/2856-1F  | CK1_CK1-PI          | PK |
| F01_cb8564_c79249/f1p0/2653-2F  | RLK-Pelle_DLSV      | PK |
| F01_cb8564_c79253/f2p0/4281-0F  | RLK-Pelle_LRR-II    | PK |
| F01_cb8564_c79264/f1p3/3503-0F  | CAMK_CAMKL-CHK1     | PK |
| F01_cb8564_c79264/f1p3/3503-0R  | CAMK_CAMKL-CHK1     | PK |
| F01_cb8564_c79285/f1p0/4747-0F  | CAMK_AMPK           | PK |
| F01_cb8564_c79285/f1p0/4747-2F  | CAMK_AMPK           | PK |
| F01_cb8564_c79291/f12p0/2841-0F | CAMK_CDPK           | PK |
| F01_cb8564_c79528/f2p1/3397-0F  | RLK-Pelle_DLSV      | PK |
| F01_cb8564_c79693/f1p1/2678-2F  | RLK-Pelle_DLSV      | PK |
| F01_cb8564_c79730/f1p0/2988-1F  | RLK-Pelle_LRR-II    | PK |
| F01_cb8564_c79905/f1p0/2920-2F  | RLK-Pelle_DLSV      | PK |
| F01_cb8564_c79924/f1p0/2967-2F  | RLK-Pelle_CrRLK1L-1 | PK |
| F01_cb8564_c79945/f2p1/1901-1F  | CAMK_CDPK           | PK |
| F01_cb8564_c79983/f1p0/1945-0F  | RLK-Pelle_LRR-XI-1  | PK |
| F01_cb8564_c79983/f1p0/1945-1F  | RLK-Pelle_LRR-XI-1  | PK |
| F01_cb8564_c79989/f1p1/3569-2F  | RLK-Pelle_DLSV      | PK |
| F01_cb8564_c80076/f1p0/3414-2F  | RLK-Pelle_LRR-I-1   | PK |
| F01_cb8564_c80108/f1p2/2992-0F  | RLK-Pelle_CrRLK1L-1 | PK |
| F01_cb8564_c80108/f1p2/2992-1F  | RLK-Pelle_CrRLK1L-1 | PK |
| F01_cb8564_c80108/f1p2/2992-2F  | RLK-Pelle_CrRLK1L-1 | PK |
| F01_cb8564_c80123/f1p1/3310-1F  | RLK-Pelle_DLSV      | PK |

---

---

|                                |                     |    |
|--------------------------------|---------------------|----|
| F01_cb8564_c80142/f1p0/3421-1F | RLK-Pelle_CrRLK1L-1 | PK |
| F01_cb8564_c80213/f1p0/3027-1F | CK1_CK1             | PK |
| F01_cb8564_c80397/f1p0/2098-1F | CAMK_AMPK           | PK |
| F01_cb8564_c80502/f1p1/2346-1F | RLK-Pelle_RLCK-VI   | PK |
| F01_cb8564_c80838/f1p0/2264-0F | Aur                 | PK |
| F01_cb8564_c80883/f1p0/3185-0F | RLK-Pelle_LRR-XI-1  | PK |
| F01_cb8564_c80883/f1p0/3185-1F | RLK-Pelle_LRR-XI-1  | PK |
| F01_cb8564_c80922/f1p0/3708-0F | RLK-Pelle_DLSV      | PK |
| F01_cb8564_c80943/f1p0/2583-1F | RLK-Pelle_DLSV      | PK |
| F01_cb8564_c80959/f1p0/2936-0F | RLK-Pelle_CrRLK1L-1 | PK |
| F01_cb8564_c80971/f1p0/4679-1F | RLK-Pelle_DLSV      | PK |
| F01_cb8564_c81227/f1p0/3713-0F | RLK-Pelle_SD-2b     | PK |
| F01_cb8564_c81246/f1p0/2901-0F | RLK-Pelle_CrRLK1L-1 | PK |
| F01_cb8564_c81281/f1p1/3440-1F | RLK-Pelle_CrRLK1L-1 | PK |
| F01_cb8564_c81424/f1p1/1904-0F | CAMK_CAMKL-CHK1     | PK |
| F01_cb8564_c81525/f1p0/3901-1F | CAMK_CDPK           | PK |
| F01_cb8564_c81658/f1p0/3480-0F | RLK-Pelle_LRR-XIIIb | PK |
| F01_cb8564_c81677/f1p0/3033-2F | RLK-Pelle_CrRLK1L-1 | PK |
| F01_cb8564_c81690/f1p0/3035-1F | RLK-Pelle_DLSV      | PK |
| F01_cb8564_c81766/f1p1/3467-0F | RLK-Pelle_DLSV      | PK |
| F01_cb8564_c81772/f1p0/3125-0F | RLK-Pelle_LRR-II    | PK |
| F01_cb8564_c81797/f1p0/3382-0F | RLK-Pelle_DLSV      | PK |
| F01_cb8564_c81801/f1p0/2224-0F | RLK-Pelle_DLSV      | PK |
| F01_cb8564_c81827/f1p0/3217-0F | RLK-Pelle_DLSV      | PK |
| F01_cb8564_c81827/f1p0/3217-1F | RLK-Pelle_DLSV      | PK |
| F01_cb8564_c81894/f1p1/3481-2F | RLK-Pelle_CrRLK1L-1 | PK |

---



---

|                                |                        |    |
|--------------------------------|------------------------|----|
| F01_cb8564_c81938/f1p0/2945-0F | RLK-Pelle_RLCK-VI      | PK |
| F01_cb8564_c81974/f1p0/4207-0F | RLK-Pelle_RLCK-VIIb    | PK |
| F01_cb8564_c81978/f1p0/4223-0F | CAMK_AMPK              | PK |
| F01_cb8564_c81978/f1p0/4223-1F | CAMK_AMPK              | PK |
| F01_cb8564_c82081/f1p0/3279-0F | RLK-Pelle_DLSV         | PK |
| F01_cb8564_c82194/f1p1/3394-0F | RLK-Pelle_WAK_LRK10L-1 | PK |
| F01_cb8564_c82280/f2p0/2262-0F | RLK-Pelle_WAK_LRK10L-1 | PK |
| F01_cb8564_c82328/f1p0/3253-0F | RLK-Pelle_DLSV         | PK |
| F01_cb8564_c82328/f1p0/3253-2F | RLK-Pelle_DLSV         | PK |
| F01_cb8564_c82425/f1p0/2589-1F | STE_STE11              | PK |
| F01_cb8564_c82499/f1p1/4897-0F | RLK-Pelle_DLSV         | PK |
| F01_cb8564_c825/f4p0/2287-1F   | RLK-Pelle_DLSV         | PK |
| F01_cb8564_c82505/f1p0/2151-1F | RLK-Pelle_LysM         | PK |
| F01_cb8564_c82521/f1p0/2413-1F | RLK-Pelle_LRR-XI-1     | PK |
| F01_cb8564_c82521/f1p0/2413-2F | RLK-Pelle_LRR-XI-1     | PK |
| F01_cb8564_c82687/f1p0/3370-1F | RLK-Pelle_DLSV         | PK |
| F01_cb8564_c82687/f1p0/3370-2F | RLK-Pelle_DLSV         | PK |
| F01_cb8564_c82795/f1p0/2546-0F | RLK-Pelle_LRR-II       | PK |
| F01_cb8564_c82866/f1p0/3058-2F | CK1_CK1-PI             | PK |
| F01_cb8564_c82948/f1p0/2074-1F | CAMK_AMPK              | PK |
| F01_cb8564_c83023/f1p0/4116-1F | RLK-Pelle_DLSV         | PK |
| F01_cb8564_c83113/f1p0/2883-1F | RLK-Pelle_SD-2b        | PK |
| F01_cb8564_c83159/f1p0/2624-1F | CAMK_CDPK              | PK |
| F01_cb8564_c83173/f1p0/3670-1F | RLK-Pelle_DLSV         | PK |
| F01_cb8564_c83173/f1p0/3670-2F | RLK-Pelle_DLSV         | PK |
| F01_cb8564_c83196/f1p0/2505-0F | RLK-Pelle_DLSV         | PK |

---

---

|                                |                      |    |
|--------------------------------|----------------------|----|
| F01_cb8564_c83196/f1p0/2505-1F | RLK-Pelle_DLSV       | PK |
| F01_cb8564_c83198/f1p0/3397-0F | RLK-Pelle_LRR-XI-1   | PK |
| F01_cb8564_c83198/f1p0/3397-2F | RLK-Pelle_LRR-XI-1   | PK |
| F01_cb8564_c83251/f1p1/3372-0F | RLK-Pelle_DLSV       | PK |
| F01_cb8564_c83694/f1p0/2192-0F | CAMK_AMPK            | PK |
| F01_cb8564_c83711/f2p0/3575-2F | CAMK_AMPK            | PK |
| F01_cb8564_c83750/f1p0/3418-1F | RLK-Pelle_CrRLK1L-1  | PK |
| F01_cb8564_c83803/f1p1/2961-1F | RLK-Pelle_SD-2b      | PK |
| F01_cb8564_c83803/f1p1/2961-2F | RLK-Pelle_SD-2b      | PK |
| F01_cb8564_c83859/f1p1/3286-2F | RLK-Pelle_DLSV       | PK |
| F01_cb8564_c83882/f1p0/2530-0F | RLK-Pelle_CrRLK1L-1  | PK |
| F01_cb8564_c83882/f1p0/2530-1F | RLK-Pelle_CrRLK1L-1  | PK |
| F01_cb8564_c84021/f3p1/2788-2F | RLK-Pelle_RLCK-VI    | PK |
| F01_cb8564_c84068/f1p0/3483-1F | RLK-Pelle_DLSV       | PK |
| F01_cb8564_c84068/f1p0/3483-2F | RLK-Pelle_CrRLK1L-1  | PK |
| F01_cb8564_c84103/f1p0/2993-1F | CK1_CK1-PI           | PK |
| F01_cb8564_c84155/f1p0/3503-1F | RLK-Pelle_CrRLK1L-1  | PK |
| F01_cb8564_c84421/f1p0/1902-0F | RLK-Pelle_RLCK-XII-1 | PK |
| F01_cb8564_c84435/f1p0/3218-1F | RLK-Pelle_CrRLK1L-1  | PK |
| F01_cb8564_c84676/f2p0/2807-0F | RLK-Pelle_SD-2b      | PK |
| F01_cb8564_c84705/f1p0/1914-1F | RLK-Pelle_DLSV       | PK |
| F01_cb8564_c84750/f1p0/3347-2F | RLK-Pelle_CrRLK1L-1  | PK |
| F01_cb8564_c84828/f1p3/3008-0F | RLK-Pelle_CrRLK1L-1  | PK |
| F01_cb8564_c84828/f1p3/3008-2F | RLK-Pelle_CrRLK1L-1  | PK |
| F01_cb8564_c84898/f1p0/3878-0F | RLK-Pelle_LysM       | PK |
| F01_cb8564_c84922/f2p0/2579-2F | CK1_CK1-PI           | PK |

---

---

|                                |                     |    |
|--------------------------------|---------------------|----|
| F01_cb8564_c85038/f1p0/3407-1F | RLK-Pelle_SD-2b     | PK |
| F01_cb8564_c85062/f1p1/3553-2F | RLK-Pelle_DLSV      | PK |
| F01_cb8564_c85408/f1p0/2335-1F | RLK-Pelle_DLSV      | PK |
| F01_cb8564_c85451/f1p0/3023-0F | RLK-Pelle_RLCK-VI   | PK |
| F01_cb8564_c85451/f1p0/3023-2F | RLK-Pelle_RLCK-VI   | PK |
| F01_cb8564_c85599/f1p0/3132-2F | RLK-Pelle_DLSV      | PK |
| F01_cb8564_c85725/f1p0/2171-1F | RLK-Pelle_LysM      | PK |
| F01_cb8564_c85969/f1p3/2183-0F | WNK_NRBP            | PK |
| F01_cb8564_c85969/f1p3/2183-1F | WNK_NRBP            | PK |
| F01_cb8564_c85978/f1p1/2839-0F | RLK-Pelle_CrRLK1L-1 | PK |
| F01_cb8564_c85978/f1p1/2839-1F | RLK-Pelle_CrRLK1L-1 | PK |
| F01_cb8564_c86191/f1p0/3642-0F | CAMK_AMPK           | PK |
| F01_cb8564_c86193/f1p0/2558-1F | RLK-Pelle_LRR-I-1   | PK |
| F01_cb8564_c86193/f1p0/2558-2F | RLK-Pelle_LRR-I-1   | PK |
| F01_cb8564_c86324/f1p0/2805-1F | RLK-Pelle_DLSV      | PK |
| F01_cb8564_c86396/f1p0/2097-2F | CAMK_CAMKL-CHK1     | PK |
| F01_cb8564_c86497/f1p0/2897-0F | RLK-Pelle_LysM      | PK |
| F01_cb8564_c86499/f1p1/3322-1F | RLK-Pelle_CrRLK1L-1 | PK |
| F01_cb8564_c86499/f1p1/3322-2F | RLK-Pelle_CrRLK1L-1 | PK |
| F01_cb8564_c86549/f3p0/2562-1F | RLK-Pelle_LRR-II    | PK |
| F01_cb8564_c86669/f1p0/3571-0F | RLK-Pelle_CrRLK1L-1 | PK |
| F01_cb8564_c86829/f1p0/2430-1F | RLK-Pelle_DLSV      | PK |
| F01_cb8564_c86975/f1p0/3253-0F | RLK-Pelle_DLSV      | PK |
| F01_cb8564_c86986/f1p0/3627-2F | RLK-Pelle_DLSV      | PK |
| F01_cb8564_c87000/f1p0/2635-1F | NAK                 | PK |
| F01_cb8564_c87035/f1p0/2284-0F | RLK-Pelle_DLSV      | PK |

---

---

|                                |                       |    |
|--------------------------------|-----------------------|----|
| F01_cb8564_c87192/f1p0/2491-1F | RLK-Pelle_LRK10L-2    | PK |
| F01_cb8564_c87344/f1p0/2474-0F | CMGC_SRPK             | PK |
| F01_cb8564_c87345/f1p0/2963-1F | RLK-Pelle_CrRLK1L-1   | PK |
| F01_cb8564_c87536/f6p0/2505-0F | RLK-Pelle_LRR-II      | PK |
| F01_cb8564_c87595/f1p0/4323-0F | RLK-Pelle_DLSV        | PK |
| F01_cb8564_c87595/f1p0/4323-2F | RLK-Pelle_DLSV        | PK |
| F01_cb8564_c87635/f1p0/2805-0F | RLK-Pelle_CrRLK1L-1   | PK |
| F01_cb8564_c87635/f1p0/2805-2F | RLK-Pelle_CrRLK1L-1   | PK |
| F01_cb8564_c8768/f7p0/3451-1F  | RLK-Pelle_DLSV        | PK |
| F01_cb8564_c87747/f1p0/3271-2F | RLK-Pelle_RLCK-VIIa-2 | PK |
| F01_cb8564_c87786/f1p1/2285-0F | AGC_RSK-2             | PK |
| F01_cb8564_c87786/f1p1/2285-2F | AGC_RSK-2             | PK |
| F01_cb8564_c87855/f1p1/2779-0F | RLK-Pelle_CrRLK1L-1   | PK |
| F01_cb8564_c87859/f1p0/3852-1F | RLK-Pelle_LRR-XI-1    | PK |
| F01_cb8564_c88064/f1p0/4623-0F | CAMK_AMPK             | PK |
| F01_cb8564_c88155/f2p0/4001-2F | RLK-Pelle_SD-2b       | PK |
| F01_cb8564_c88582/f1p0/2884-1F | RLK-Pelle_CrRLK1L-1   | PK |
| F01_cb8564_c88722/f1p0/4185-1F | RLK-Pelle_DLSV        | PK |
| F01_cb8564_c88757/f1p0/2347-2F | RLK-Pelle_DLSV        | PK |
| F01_cb8564_c88819/f1p0/3550-0F | RLK-Pelle_DLSV        | PK |
| F01_cb8564_c88853/f1p0/2988-0F | RLK-Pelle_CrRLK1L-1   | PK |
| F01_cb8564_c88886/f1p0/3995-0F | RLK-Pelle_DLSV        | PK |
| F01_cb8564_c88906/f1p0/3156-1F | RLK-Pelle_RLCK-VI     | PK |
| F01_cb8564_c89596/f1p0/3266-0F | RLK-Pelle_DLSV        | PK |
| F01_cb8564_c89619/f1p0/4818-0F | RLK-Pelle_LRR-I-1     | PK |
| F01_cb8564_c89827/f3p0/3331-2F | RLK-Pelle_DLSV        | PK |

---

---

|                                |                       |    |
|--------------------------------|-----------------------|----|
| F01_cb8564_c90031/f1p0/4423-0F | RLK-Pelle_LysM        | PK |
| F01_cb8564_c90046/f1p0/2504-2F | CK1_CK1-PI            | PK |
| F01_cb8564_c90089/f1p0/3202-2F | RLK-Pelle_RLCK-VIIa-2 | PK |
| F01_cb8564_c90171/f1p0/2007-0F | RLK-Pelle_CrRLK1L-1   | PK |
| F01_cb8564_c90361/f2p0/2743-0F | Group-PI-3            | PK |
| F01_cb8564_c90462/f1p1/3321-1F | RLK-Pelle_DLSV        | PK |
| F01_cb8564_c90472/f2p0/2171-0F | RLK-Pelle_SD-2b       | PK |
| F01_cb8564_c90587/f1p0/3448-1F | RLK-Pelle_LysM        | PK |
| F01_cb8564_c90675/f1p0/3207-1F | RLK-Pelle_DLSV        | PK |
| F01_cb8564_c90723/f1p0/2496-0F | RLK-Pelle_LRR-II      | PK |
| F01_cb8564_c90831/f2p1/2565-0F | RLK-Pelle_RLCK-VI     | PK |
| F01_cb8564_c90837/f1p0/2097-2F | Aur                   | PK |
| F01_cb8564_c90863/f1p0/3539-0F | RLK-Pelle_DLSV        | PK |
| F01_cb8564_c91017/f1p0/2537-1F | RLK-Pelle_RLCK-VI     | PK |
| F01_cb8564_c91017/f1p0/2537-2F | RLK-Pelle_RLCK-VI     | PK |
| F01_cb8564_c91137/f1p0/3102-2F | RLK-Pelle_LRR-II      | PK |
| F01_cb8564_c9117/f2p0/2201-0F  | AGC-PI                | PK |
| F01_cb8564_c9117/f2p0/2201-1F  | AGC-PI                | PK |
| F01_cb8564_c91252/f1p0/3201-0F | RLK-Pelle_LRR-II      | PK |
| F01_cb8564_c91267/f1p0/2862-0F | RLK-Pelle_SD-2b       | PK |
| F01_cb8564_c91276/f1p0/2372-1F | CAMK_CDPK             | PK |
| F01_cb8564_c91405/f1p1/2994-0F | RLK-Pelle_CrRLK1L-1   | PK |
| F01_cb8564_c91405/f1p1/2994-1F | RLK-Pelle_CrRLK1L-1   | PK |
| F01_cb8564_c91454/f1p2/3641-2F | RLK-Pelle_DLSV        | PK |
| F01_cb8564_c91775/f1p1/3299-1F | STE_STE11             | PK |
| F01_cb8564_c91775/f1p1/3299-2F | STE_STE11             | PK |

---

---

|                                |                        |    |
|--------------------------------|------------------------|----|
| F01_cb8564_c91839/f1p0/2218-0F | RLK-Pelle_LRK10L-2     | PK |
| F01_cb8564_c91965/f1p0/4169-2F | CK1_CK1-PI             | PK |
| F01_cb8564_c92004/f1p0/3165-2F | RLK-Pelle_SD-2b        | PK |
| F01_cb8564_c92057/f1p0/3432-1F | RLK-Pelle_CrRLK1L-1    | PK |
| F01_cb8564_c92122/f1p0/4505-1F | RLK-Pelle_DLSV         | PK |
| F01_cb8564_c92122/f1p0/4505-2F | RLK-Pelle_DLSV         | PK |
| F01_cb8564_c92254/f1p0/3559-2F | RLK-Pelle_DLSV         | PK |
| F01_cb8564_c93761/f8p4/3293-2F | RLK-Pelle_LRR-VIII-1   | PK |
| F01_cb8564_c9410/f3p1/3347-1F  | RLK-Pelle_LRR-XII-1    | PK |
| F01_cb8564_c943/f2p0/2919-0F   | RLK-Pelle_LRR-XI-1     | PK |
| F01_cb8564_c9440/f6p0/2195-2F  | RLK-Pelle_LRK10L-2     | PK |
| F01_cb8564_c9481/f3p0/2666-1F  | RLK-Pelle_LRR-VI-2     | PK |
| F01_cb8564_c96400/f1p0/2636-0F | RLK-Pelle_LRR-XI-1     | PK |
| F01_cb8564_c96404/f1p3/3164-0F | RLK-Pelle_CrRLK1L-1    | PK |
| F01_cb8564_c96404/f1p3/3164-2F | RLK-Pelle_CrRLK1L-1    | PK |
| F01_cb8564_c9744/f2p0/4141-0F  | RLK-Pelle_CrRLK1L-1    | PK |
| F01_cb8564_c9744/f2p0/4141-2F  | RLK-Pelle_RLCK-VIIa-2  | PK |
| F01_cb8564_c9746/f3p3/3969-2F  | RLK-Pelle_LRR-XII-1    | PK |
| F01_cb8564_c9771/f3p1/2625-2F  | RLK-Pelle_LRR-VI-2     | PK |
| F01_cb8564_c9893/f7p1/3111-0F  | RLK-Pelle_LRR-XI-1     | PK |
| F01_cb8564_c9950/f3p1/2453-2F  | STE_STE11              | PK |
| F01_cb8564_c9954/f2p0/3282-2F  | RLK-Pelle_LRR-XI-1     | PK |
| F01_cb8570_c0/f1p0/2329-0F     | RLK-Pelle_WAK_LRK10L-1 | PK |
| F01_cb8570_c1/f1p0/2487-2F     | RLK-Pelle_WAK_LRK10L-1 | PK |
| F01_cb8613_c1/f2p0/2410-2F     | RLK-Pelle_LRR-III      | PK |
| F01_cb8613_c2/f1p0/2424-0F     | RLK-Pelle_LRR-III      | PK |

---

---

|                            |                      |    |
|----------------------------|----------------------|----|
| F01_cb862_c1/f2p0/3252-0F  | RLK-Pelle_LRR-VIII-1 | PK |
| F01_cb862_c10/f1p0/3428-1F | RLK-Pelle_LRR-VIII-1 | PK |
| F01_cb862_c11/f1p0/3220-0F | RLK-Pelle_LRR-VIII-1 | PK |
| F01_cb862_c12/f1p0/3756-2F | RLK-Pelle_LRR-VIII-1 | PK |
| F01_cb862_c15/f1p0/3207-2F | RLK-Pelle_LRR-VIII-1 | PK |
| F01_cb862_c16/f1p0/2631-1F | RLK-Pelle_LRR-VIII-1 | PK |
| F01_cb862_c17/f1p0/2770-1F | RLK-Pelle_LRR-VIII-1 | PK |
| F01_cb862_c18/f1p0/3367-2F | RLK-Pelle_LRR-VIII-1 | PK |
| F01_cb862_c2/f1p0/4599-1F  | RLK-Pelle_LRR-VIII-1 | PK |
| F01_cb862_c21/f1p0/3616-2F | RLK-Pelle_LRR-VIII-1 | PK |
| F01_cb862_c22/f1p0/3314-0F | RLK-Pelle_LRR-VIII-1 | PK |
| F01_cb862_c23/f1p0/3466-0F | RLK-Pelle_LRR-VIII-1 | PK |
| F01_cb862_c24/f1p0/3226-0F | RLK-Pelle_LRR-VIII-1 | PK |
| F01_cb862_c25/f1p0/2839-1F | RLK-Pelle_LRR-VIII-1 | PK |
| F01_cb862_c26/f1p0/2964-0F | RLK-Pelle_LRR-VIII-1 | PK |
| F01_cb862_c27/f1p0/3141-0F | RLK-Pelle_LRR-VIII-1 | PK |
| F01_cb862_c31/f1p0/5935-0F | RLK-Pelle_LRR-VIII-1 | PK |
| F01_cb862_c5/f1p0/3238-0F  | RLK-Pelle_LRR-VIII-1 | PK |
| F01_cb862_c7/f1p0/2681-0F  | RLK-Pelle_LRR-VIII-1 | PK |
| F01_cb862_c8/f1p0/3325-2F  | RLK-Pelle_LRR-VIII-1 | PK |
| F01_cb8649_c0/f2p0/2325-2F | RLK-Pelle_LRR-VIII-1 | PK |
| F01_cb8649_c1/f1p0/2228-0F | RLK-Pelle_LRR-VIII-1 | PK |
| F01_cb8649_c1/f1p0/2228-2F | RLK-Pelle_LRR-VIII-1 | PK |
| F01_cb8655_c0/f1p0/2306-1F | RLK-Pelle_L-LEC      | PK |
| F01_cb8658_c0/f1p0/2305-2F | TKL-PI-4             | PK |
| F01_cb8658_c2/f1p0/2311-0F | TKL-PI-4             | PK |

---

---

|                             |                       |    |
|-----------------------------|-----------------------|----|
| F01_cb8658_c3/f1p0/2265-0F  | TKL_Gdt               | PK |
| F01_cb8658_c3/f1p0/2265-2F  | TKL-PI-4              | PK |
| F01_cb8658_c4/f1p0/3502-0F  | TKL-PI-4              | PK |
| F01_cb8658_c6/f1p0/3454-1F  | TKL_Gdt               | PK |
| F01_cb8658_c6/f1p0/3454-2F  | TKL-PI-4              | PK |
| F01_cb8659_c0/f2p0/2306-1F  | RLK-Pelle_RLCK-XI     | PK |
| F01_cb8659_c0/f2p0/2306-2F  | RLK-Pelle_RLCK-XI     | PK |
| F01_cb8659_c1/f1p0/2273-0F  | RLK-Pelle_RLCK-XI     | PK |
| F01_cb8659_c3/f1p0/1416-2F  | RLK-Pelle_RLCK-XI     | PK |
| F01_cb8675_c0/f1p0/2308-1F  | RLK-Pelle_RLCK-XI     | PK |
| F01_cb8675_c1/f1p0/2167-0F  | RLK-Pelle_RLCK-XI     | PK |
| F01_cb8687_c10/f2p0/1657-1F | RLK-Pelle_RLCK-VIIa-1 | PK |
| F01_cb8687_c13/f1p0/1583-2F | RLK-Pelle_RLCK-VIIa-1 | PK |
| F01_cb8687_c2/f2p0/1575-0F  | RLK-Pelle_RLCK-VIIa-1 | PK |
| F01_cb8687_c3/f1p0/2296-0F  | RLK-Pelle_RLCK-VIIa-1 | PK |
| F01_cb8687_c3/f1p0/2296-1F  | RLK-Pelle_RLCK-VIIa-1 | PK |
| F01_cb8687_c4/f1p0/3035-1F  | RLK-Pelle_RLCK-VIIa-1 | PK |
| F01_cb8687_c5/f1p0/1932-0F  | RLK-Pelle_RLCK-VIIa-1 | PK |
| F01_cb8687_c5/f1p0/1932-1F  | RLK-Pelle_RLCK-VIIa-1 | PK |
| F01_cb8687_c8/f1p0/1570-1F  | RLK-Pelle_RLCK-VIIa-1 | PK |
| F01_cb8698_c0/f12p0/2111-0F | AGC-PI                | PK |
| F01_cb8698_c7/f1p0/2165-1F  | AGC-PI                | PK |
| F01_cb8698_c8/f1p0/2067-1F  | AGC-PI                | PK |
| F01_cb8764_c1/f6p1/2165-2F  | CAMK_CAMKL-CHK1       | PK |
| F01_cb8764_c11/f1p1/2234-2F | CAMK_CAMKL-CHK1       | PK |
| F01_cb8764_c13/f8p0/2189-1F | CAMK_CAMKL-CHK1       | PK |

---



---

|                             |                        |    |
|-----------------------------|------------------------|----|
| F01_cb8764_c4/flp0/2406-1F  | CAMK_CAMKL-CHK1        | PK |
| F01_cb8764_c5/flp0/3284-2F  | CAMK_CAMKL-CHK1        | PK |
| F01_cb8764_c7/flp0/3184-0F  | CAMK_CAMKL-CHK1        | PK |
| F01_cb8764_c7/flp0/3184-1F  | CAMK_CAMKL-CHK1        | PK |
| F01_cb8764_c8/flp0/2430-0F  | CAMK_CAMKL-CHK1        | PK |
| F01_cb8779_c12/flp0/3324-1R | RLK-Pelle_SD-2b        | PK |
| F01_cb8779_c14/flp0/3251-1R | RLK-Pelle_SD-2b        | PK |
| F01_cb8779_c14/flp0/3251-2R | RLK-Pelle_SD-2b        | PK |
| F01_cb8787_c0/flp0/2276-1F  | RLK-Pelle_WAK_LRK10L-1 | PK |
| F01_cb8843_c0/flp0/2265-2F  | TKL-PI-4               | PK |
| F01_cb8843_c1/flp0/1986-1F  | TKL-PI-4               | PK |
| F01_cb8843_c2/flp0/1903-1F  | TKL-PI-4               | PK |
| F01_cb8871_c0/flp0/2247-0F  | AGC_RSK-2              | PK |
| F01_cb8871_c0/flp0/2247-2F  | AGC_RSK-2              | PK |
| F01_cb8871_c1/flp0/2182-1F  | AGC_RSK-2              | PK |
| F01_cb8871_c3/flp0/1531-2F  | AGC_RSK-2              | PK |
| F01_cb8924_c2/flp1/2141-1F  | RLK-Pelle_RLCK-V       | PK |
| F01_cb8924_c3/flp0/2164-2F  | RLK-Pelle_RLCK-V       | PK |
| F01_cb8924_c4/flp0/2227-2F  | RLK-Pelle_RLCK-V       | PK |
| F01_cb8931_c15/flp0/1567-0F | CAMK_CAMKL-CHK1        | PK |
| F01_cb8931_c15/flp0/1567-2F | CAMK_CAMKL-CHK1        | PK |
| F01_cb8931_c17/flp1/2168-1F | CAMK_CAMKL-CHK1        | PK |
| F01_cb8931_c2/f4p1/2097-1F  | CAMK_CAMKL-CHK1        | PK |
| F01_cb8931_c20/flp2/2173-2F | CAMK_CAMKL-CHK1        | PK |
| F01_cb8931_c22/flp0/814-1F  | CAMK_CAMKL-CHK1        | PK |
| F01_cb8931_c5/f4p1/2097-2F  | CAMK_CAMKL-CHK1        | PK |

---

---

|                              |                 |    |
|------------------------------|-----------------|----|
| F01_cb8931_c7/f1p0/2326-0F   | CAMK_OST1L      | PK |
| F01_cb8931_c7/f1p0/2326-2F   | CAMK_CAMKL-CHK1 | PK |
| F01_cb8972_c1/f1p0/2282-1F   | CAMK_CDPK       | PK |
| F01_cb8972_c1/f1p0/2282-2F   | CAMK_CDPK       | PK |
| F01_cb8972_c15/f12p0/2217-0F | CAMK_CDPK       | PK |
| F01_cb8972_c7/f1p0/2254-2F   | CAMK_CDPK       | PK |
| F01_cb8972_c8/f1p0/2251-1F   | CAMK_CDPK       | PK |
| F01_cb8972_c8/f1p0/2251-2F   | CAMK_CDPK       | PK |
| F01_cb8972_c9/f1p0/2155-2F   | CAMK_CDPK       | PK |
| F01_cb897_c10/f1p0/3008-1F   | CK1_CK1-PI      | PK |
| F01_cb897_c11/f1p1/3229-2F   | CK1_CK1-PI      | PK |
| F01_cb897_c13/f1p1/3220-1F   | CK1_CK1-PI      | PK |
| F01_cb897_c18/f1p0/3399-2F   | CK1_CK1-PI      | PK |
| F01_cb897_c21/f1p0/3157-2F   | CK1_CK1-PI      | PK |
| F01_cb897_c24/f1p0/3809-1F   | CK1_CK1-PI      | PK |
| F01_cb897_c25/f1p0/3279-0F   | CK1_CK1-PI      | PK |
| F01_cb897_c26/f1p0/3536-0F   | CK1_CK1-PI      | PK |
| F01_cb897_c28/f1p0/3140-2F   | CK1_CK1-PI      | PK |
| F01_cb897_c30/f1p0/2403-0F   | CK1_CK1-PI      | PK |
| F01_cb897_c33/f1p0/3077-1F   | CK1_CK1-PI      | PK |
| F01_cb897_c34/f1p0/2834-2F   | CK1_CK1-PI      | PK |
| F01_cb897_c8/f1p0/4517-2F    | CK1_CK1-PI      | PK |
| F01_cb897_c9/f1p1/3651-0F    | CK1_CK1-PI      | PK |
| F01_cb8998_c0/f1p0/2213-0F   | TKL-PI-5        | PK |
| F01_cb8998_c0/f1p0/2213-1F   | TKL-PI-5        | PK |
| F01_cb8998_c0/f1p0/2213-2F   | TKL-PI-5        | PK |

---

---

|                              |                       |    |
|------------------------------|-----------------------|----|
| F01_cb8998_c1/f1p0/2414-1F   | TKL-PI-5              | PK |
| F01_cb9018_c11/f5p0/1856-1F  | CMGC_GSK              | PK |
| F01_cb9018_c11/f5p0/1856-2F  | CMGC_GSK              | PK |
| F01_cb9018_c12/f19p0/1819-2F | CMGC_GSK              | PK |
| F01_cb9018_c2/f2p1/1808-1F   | CMGC_GSK              | PK |
| F01_cb9018_c3/f1p0/2198-1F   | CMGC_GSK              | PK |
| F01_cb9018_c6/f1p0/1972-2F   | CMGC_GSK              | PK |
| F01_cb9018_c7/f1p0/1749-2F   | CMGC_GSK              | PK |
| F01_cb9025_c0/f1p0/2209-0F   | RLK-Pelle_RLCK-VIIa-1 | PK |
| F01_cb9025_c1/f1p0/2032-2F   | RLK-Pelle_RLCK-VIIa-1 | PK |
| F01_cb9025_c2/f1p0/2097-1F   | RLK-Pelle_RLCK-VIIa-1 | PK |
| F01_cb9053_c10/f1p1/1983-2F  | CAMK_CAMKL-CHK1       | PK |
| F01_cb9053_c3/f4p1/2186-1F   | CAMK_CAMKL-CHK1       | PK |
| F01_cb9053_c6/f1p0/2093-0F   | CAMK_CAMKL-CHK1       | PK |
| F01_cb9053_c6/f1p0/2093-2F   | CAMK_CAMKL-CHK1       | PK |
| F01_cb9053_c7/f1p0/1807-1F   | CAMK_CAMKL-CHK1       | PK |
| F01_cb9053_c7/f1p0/1807-2F   | CAMK_CAMKL-CHK1       | PK |
| F01_cb9053_c9/f6p1/2030-1F   | CAMK_CAMKL-CHK1       | PK |
| F01_cb9057_c0/f1p0/2199-0F   | RLK-Pelle_DLSV        | PK |
| F01_cb9057_c0/f1p0/2199-2F   | RLK-Pelle_DLSV        | PK |
| F01_cb9057_c1/f1p0/1949-0F   | RLK-Pelle_DLSV        | PK |
| F01_cb9057_c2/f1p0/2081-1F   | RLK-Pelle_DLSV        | PK |
| F01_cb9057_c4/f1p0/2149-1F   | RLK-Pelle_DLSV        | PK |
| F01_cb9057_c5/f1p0/2010-1F   | RLK-Pelle_DLSV        | PK |
| F01_cb9057_c7/f1p0/1426-0F   | RLK-Pelle_DLSV        | PK |
| F01_cb9057_c7/f1p0/1426-1F   | RLK-Pelle_DLSV        | PK |

---

---

|                             |                   |    |
|-----------------------------|-------------------|----|
| F01_cb9061_c14/f3p0/2326-0F | RLK-Pelle_LRR-III | PK |
| F01_cb9061_c36/flp0/2363-1F | RLK-Pelle_LRR-III | PK |
| F01_cb9061_c36/flp0/2363-2F | RLK-Pelle_LRR-III | PK |
| F01_cb9061_c37/flp0/2495-2F | RLK-Pelle_LRR-III | PK |
| F01_cb9061_c38/flp0/2450-2F | RLK-Pelle_LRR-III | PK |
| F01_cb9061_c40/flp0/2523-0F | RLK-Pelle_LRR-III | PK |
| F01_cb9061_c41/flp0/2654-0F | RLK-Pelle_LRR-III | PK |
| F01_cb9061_c45/flp1/2398-1F | RLK-Pelle_LRR-III | PK |
| F01_cb9061_c45/flp1/2398-2F | RLK-Pelle_LRR-III | PK |
| F01_cb9061_c49/flp0/2410-0F | RLK-Pelle_LRR-III | PK |
| F01_cb9061_c50/flp0/2140-0F | RLK-Pelle_LRR-III | PK |
| F01_cb9061_c50/flp0/2140-1F | RLK-Pelle_LRR-III | PK |
| F01_cb9061_c8/f6p0/2350-1F  | RLK-Pelle_LRR-III | PK |
| F01_cb9061_c9/f3p1/2536-0F  | RLK-Pelle_LRR-III | PK |
| F01_cb9064_c12/flp2/1954-1F | CAMK_CAMKL-CHK1   | PK |
| F01_cb9064_c17/flp2/2047-2F | CAMK_CAMKL-CHK1   | PK |
| F01_cb9064_c30/flp0/1539-2F | CAMK_CAMKL-CHK1   | PK |
| F01_cb9064_c39/flp0/649-0F  | CAMK_CAMKL-CHK1   | PK |
| F01_cb9064_c9/flp0/2197-0F  | CAMK_CAMKL-CHK1   | PK |
| F01_cb9075_c0/f2p0/2171-1F  | NEK               | PK |
| F01_cb9075_c1/flp0/2135-2F  | NEK               | PK |
| F01_cb9076_c0/flp0/2192-0F  | RLK-Pelle_RLCK-VI | PK |
| F01_cb9076_c1/flp0/2158-0F  | RLK-Pelle_RLCK-VI | PK |
| F01_cb9076_c2/flp0/2130-0F  | RLK-Pelle_RLCK-VI | PK |
| F01_cb9105_c2/flp1/2185-1F  | CMGC_CLK          | PK |
| F01_cb9105_c3/flp0/1933-2F  | CMGC_CLK          | PK |

---

---

|                              |                       |    |
|------------------------------|-----------------------|----|
| F01_cb9105_c8/f2p0/1770-1F   | CMGC_CLK              | PK |
| F01_cb9115_c0/f2p0/2025-1F   | AGC_RSK-2             | PK |
| F01_cb9115_c2/f1p0/2131-1F   | AGC_RSK-2             | PK |
| F01_cb9143_c137/f1p0/3665-0F | CAMK_CDPK             | PK |
| F01_cb9194_c1/f1p0/2285-1F   | CAMK_CAMKL-CHK1       | PK |
| F01_cb9250_c1/f1p0/2385-0F   | RLK-Pelle_L-LEC       | PK |
| F01_cb9264_c2/f1p0/1981-0F   | RLK-Pelle_RLCK-II     | PK |
| F01_cb9264_c4/f2p0/2028-0F   | RLK-Pelle_RLCK-II     | PK |
| F01_cb9264_c5/f1p0/2108-1F   | RLK-Pelle_RLCK-II     | PK |
| F01_cb9292_c13/f1p0/1702-0F  | RLK-Pelle_PERK-2      | PK |
| F01_cb9327_c0/f2p1/2017-1F   | TKL-PI-4              | PK |
| F01_cb9327_c0/f2p1/2017-2F   | TKL-PI-4              | PK |
| F01_cb9327_c1/f2p1/1981-0F   | TKL-PI-4              | PK |
| F01_cb9327_c3/f1p0/2087-0F   | TKL-PI-4              | PK |
| F01_cb9340_c0/f1p0/2116-0F   | RLK-Pelle_RLCK-VIIa-1 | PK |
| F01_cb9340_c1/f1p0/2378-0F   | RLK-Pelle_RLCK-VIIa-1 | PK |
| F01_cb9340_c1/f1p0/2378-1F   | RLK-Pelle_RLCK-VIIa-1 | PK |
| F01_cb9349_c13/f1p1/1813-1F  | NAK                   | PK |
| F01_cb9349_c16/f1p0/1742-0F  | NAK                   | PK |
| F01_cb9349_c16/f1p0/1742-2F  | NAK                   | PK |
| F01_cb9349_c17/f1p0/1743-0F  | NAK                   | PK |
| F01_cb9349_c21/f5p1/1481-1F  | NAK                   | PK |
| F01_cb9349_c8/f2p0/1693-1F   | NAK                   | PK |
| F01_cb9400_c0/f2p0/2063-2F   | Group-PI-3            | PK |
| F01_cb9400_c1/f1p0/2099-1F   | Group-PI-3            | PK |
| F01_cb9400_c2/f1p0/3693-1F   | Group-PI-3            | PK |

---

---

|                             |                       |    |
|-----------------------------|-----------------------|----|
| F01_cb9400_c3/f1p0/2055-0F  | Group-PI-3            | PK |
| F01_cb9412_c1/f4p0/2105-1F  | RLK-Pelle_RLCK-VIIa-2 | PK |
| F01_cb9412_c2/f1p0/2904-2F  | RLK-Pelle_RLCK-VIIa-2 | PK |
| F01_cb9412_c3/f1p0/1975-2F  | RLK-Pelle_RLCK-VIIa-2 | PK |
| F01_cb9417_c0/f18p2/1832-2F | TKL-PI-4              | PK |
| F01_cb9417_c2/f3p2/1912-1F  | TKL-PI-4              | PK |
| F01_cb9417_c3/f1p0/2093-0F  | TKL-PI-4              | PK |
| F01_cb9417_c7/f1p2/1820-0F  | TKL-PI-4              | PK |
| F01_cb944_c61/f1p0/2278-0F  | RLK-Pelle_RLCK-V      | PK |
| F01_cb944_c63/f1p1/2372-2F  | RLK-Pelle_RLCK-V      | PK |
| F01_cb944_c67/f1p0/1598-1F  | RLK-Pelle_RLCK-V      | PK |
| F01_cb944_c96/f9p2/2331-0F  | RLK-Pelle_RLCK-V      | PK |
| F01_cb944_c97/f7p2/2379-1F  | RLK-Pelle_RLCK-V      | PK |
| F01_cb9465_c0/f6p0/2000-0F  | CAMK_CAMKL-CHK1       | PK |
| F01_cb9465_c1/f1p1/2022-1F  | CAMK_CAMKL-CHK1       | PK |
| F01_cb9465_c1/f1p1/2022-2F  | CAMK_CAMKL-CHK1       | PK |
| F01_cb9465_c2/f1p0/1816-1F  | CAMK_CAMKL-CHK1       | PK |
| F01_cb9481_c1/f1p0/2070-1F  | CAMK_CDPK             | PK |
| F01_cb9483_c0/f3p0/2156-1F  | CAMK_CAMKL-CHK1       | PK |
| F01_cb9483_c12/f1p0/2249-2F | CAMK_CAMKL-CHK1       | PK |
| F01_cb9483_c16/f1p0/1966-0F | CAMK_CAMKL-CHK1       | PK |
| F01_cb9483_c18/f1p0/2201-0F | CAMK_CAMKL-CHK1       | PK |
| F01_cb9483_c4/f2p1/2250-0F  | CAMK_CAMKL-CHK1       | PK |
| F01_cb9483_c5/f1p0/3199-0F  | CAMK_CAMKL-CHK1       | PK |
| F01_cb9483_c8/f1p0/2183-0F  | CAMK_CAMKL-CHK1       | PK |
| F01_cb9483_c8/f1p0/2183-1F  | CAMK_CAMKL-CHK1       | PK |

---

---

|                             |                  |    |
|-----------------------------|------------------|----|
| F01_cb9483_c9/flp0/2094-0F  | CAMK_CAMKL-CHK1  | PK |
| F01_cb9491_c1/f2p0/1929-1F  | RLK-Pelle_RLCK-V | PK |
| F01_cb9491_c10/f3p0/1919-2F | RLK-Pelle_RLCK-V | PK |
| F01_cb9491_c3/flp0/1965-0F  | RLK-Pelle_RLCK-V | PK |
| F01_cb9491_c3/flp0/1965-2F  | RLK-Pelle_RLCK-V | PK |
| F01_cb9491_c4/flp0/1989-0F  | RLK-Pelle_RLCK-V | PK |
| F01_cb9491_c7/flp0/1809-1F  | RLK-Pelle_RLCK-V | PK |
| F01_cb9499_c3/flp0/2215-0F  | TKL-PI-4         | PK |
| F01_cb9499_c6/flp0/1800-2F  | TKL-PI-4         | PK |
| F01_cb9513_c14/f2p2/1964-0F | CAMK_CAMKL-CHK1  | PK |
| F01_cb9513_c31/flp0/2513-0F | CAMK_CAMKL-CHK1  | PK |
| F01_cb9513_c31/flp0/2513-1F | CAMK_CAMKL-CHK1  | PK |
| F01_cb9513_c33/flp0/2509-0F | CAMK_CAMKL-CHK1  | PK |
| F01_cb9513_c33/flp0/2509-1F | CAMK_OST1L       | PK |
| F01_cb9513_c35/flp0/2739-1F | CAMK_CAMKL-CHK1  | PK |
| F01_cb9513_c37/flp1/2223-0F | CAMK_CAMKL-CHK1  | PK |
| F01_cb9513_c37/flp1/2223-1F | CAMK_CAMKL-CHK1  | PK |
| F01_cb9513_c38/flp0/2842-0F | CAMK_CAMKL-CHK1  | PK |
| F01_cb9513_c38/flp0/2842-1F | CAMK_CAMKL-CHK1  | PK |
| F01_cb9513_c42/flp0/2488-0F | CAMK_CAMKL-CHK1  | PK |
| F01_cb9513_c42/flp0/2488-2F | CAMK_CAMKL-CHK1  | PK |
| F01_cb9513_c43/flp0/2384-0F | CAMK_CAMKL-CHK1  | PK |
| F01_cb9513_c43/flp0/2384-1F | CAMK_CAMKL-CHK1  | PK |
| F01_cb9513_c46/flp2/3668-1F | CAMK_CAMKL-CHK1  | PK |
| F01_cb9513_c51/flp0/2168-0F | CAMK_CAMKL-CHK1  | PK |
| F01_cb9513_c52/flp0/2397-0F | CAMK_CAMKL-CHK1  | PK |

---

---

|                             |                    |    |
|-----------------------------|--------------------|----|
| F01_cb9513_c52/flp0/2397-2F | CAMK_CAMKL-CHK1    | PK |
| F01_cb9513_c53/flp0/2546-0F | RLK-Pelle_L-LEC    | PK |
| F01_cb9513_c77/flp0/2335-1F | CAMK_CAMKL-CHK1    | PK |
| F01_cb9513_c78/flp1/2057-1F | CAMK_CAMKL-CHK1    | PK |
| F01_cb9513_c80/flp0/2294-2F | CAMK_CAMKL-CHK1    | PK |
| F01_cb9513_c81/flp0/1984-1F | CAMK_CAMKL-CHK1    | PK |
| F01_cb9513_c87/f5p1/1971-1F | CAMK_CAMKL-CHK1    | PK |
| F01_cb9598_c11/f2p0/1690-1F | CAMK_CAMKL-CHK1    | PK |
| F01_cb9598_c11/f2p0/1690-2F | CAMK_CAMKL-CHK1    | PK |
| F01_cb9598_c2/flp1/2036-0F  | CAMK_CAMKL-CHK1    | PK |
| F01_cb9598_c3/flp0/2266-2F  | CAMK_CAMKL-CHK1    | PK |
| F01_cb9598_c5/flp0/1480-2F  | CAMK_CAMKL-CHK1    | PK |
| F01_cb9598_c6/flp0/1428-1F  | CAMK_CAMKL-CHK1    | PK |
| F01_cb961_c0/flp0/4551-2F   | RLK-Pelle_LRR-Xb-1 | PK |
| F01_cb961_c2/flp0/4748-0F   | RLK-Pelle_LRR-Xb-1 | PK |
| F01_cb961_c3/flp0/4441-0F   | RLK-Pelle_LRR-Xb-1 | PK |
| F01_cb961_c3/flp0/4441-1F   | RLK-Pelle_LRR-Xb-1 | PK |
| F01_cb961_c4/flp0/4404-0F   | RLK-Pelle_LRR-Xb-1 | PK |
| F01_cb961_c4/flp0/4404-1F   | RLK-Pelle_LRR-Xb-1 | PK |
| F01_cb9667_c0/f3p0/1941-0F  | Group-Pl-4         | PK |
| F01_cb9667_c2/flp0/2017-2F  | Group-Pl-4         | PK |
| F01_cb9667_c4/flp0/1542-0F  | Group-Pl-4         | PK |
| F01_cb9667_c5/f7p0/1958-1F  | Group-Pl-4         | PK |
| F01_cb9701_c1/flp0/2067-1F  | CAMK_CDPK          | PK |
| F01_cb9701_c3/flp0/1897-0F  | CAMK_CDPK          | PK |
| F01_cb9701_c3/flp0/1897-2F  | CAMK_CDPK          | PK |

---



---

|                            |                    |    |
|----------------------------|--------------------|----|
| F01_cb9709_c3/f1p0/2084-1F | RLK-Pelle_RLCK-V   | PK |
| F01_cb9709_c5/f1p0/1785-0F | RLK-Pelle_RLCK-V   | PK |
| F01_cb9755_c0/f1p0/1983-0F | CMGC_CDK-CRK7-CDK9 | PK |
| F01_cb9755_c2/f1p0/1869-0F | CMGC_CDK-CRK7-CDK9 | PK |
| F01_cb9764_c1/f1p0/2030-0F | AGC_RSK-2          | PK |
| F01_cb9764_c2/f1p0/1862-1F | AGC_RSK-2          | PK |
| F01_cb9804_c2/f3p1/1971-0F | CMGC_MAPK          | PK |
| F01_cb9804_c3/f1p1/3028-1F | CMGC_MAPK          | PK |
| F01_cb9804_c5/f1p0/1884-0F | CMGC_MAPK          | PK |
| F01_cb9804_c6/f1p1/1792-0F | CMGC_MAPK          | PK |
| F01_cb9804_c7/f1p1/1683-0F | CMGC_MAPK          | PK |
| F01_cb9809_c0/f1p0/1980-1F | TKL-PI-5           | PK |
| F01_cb9809_c1/f1p0/2020-2F | TKL-PI-5           | PK |
| F01_cb9809_c3/f1p1/1875-0F | TKL-PI-5           | PK |
| F01_cb9809_c3/f1p1/1875-1F | TKL-PI-5           | PK |
| F01_cb9809_c4/f1p1/1875-0F | TKL-PI-5           | PK |
| F01_cb9809_c4/f1p1/1875-1F | TKL-PI-5           | PK |
| F01_cb9809_c4/f1p1/1875-2F | TKL-PI-5           | PK |
| F01_cb9809_c5/f1p1/1862-0F | TKL-PI-5           | PK |
| F01_cb9809_c7/f1p0/1782-1F | TKL-PI-5           | PK |
| F01_cb9831_c3/f1p0/1857-1F | RLK-Pelle_RLCK-VI  | PK |
| F01_cb9831_c5/f4p1/1950-1F | RLK-Pelle_RLCK-VI  | PK |
| F01_cb9884_c0/f1p0/1938-2F | RLK-Pelle_RLCK-VI  | PK |
| F01_cb9884_c1/f1p0/2114-0F | RLK-Pelle_RLCK-VI  | PK |
| F01_cb9905_c0/f2p1/1924-2F | RLK-Pelle_LysM     | PK |
| F01_cb9905_c3/f1p0/1859-2F | RLK-Pelle_LysM     | PK |

---

---

|                              |                      |    |
|------------------------------|----------------------|----|
| F01_cb9905_c4/flp0/1859-2F   | RLK-Pelle_LysM       | PK |
| F01_cb9920_c0/flp0/1922-0F   | RLK-Pelle_RLCK-Os    | PK |
| F01_cb9980_c2/flp0/2014-0F   | CMGC_CDK-CDK7        | PK |
| F01_cb9980_c3/flp0/1858-1F   | CMGC_CDK-CDK7        | PK |
| F01_cb9980_c6/flp0/1501-1F   | CMGC_CDK-CDK7        | PK |
| F01_cb9994_c16/f2p2/1976-0F  | RLK-Pelle_RLCK-XII-1 | PK |
| F01_cb9994_c17/flp0/1879-0F  | RLK-Pelle_RLCK-XII-1 | PK |
| F01_cb9994_c18/flp0/1919-0F  | RLK-Pelle_RLCK-XII-1 | PK |
| F01_cb9994_c18/flp0/1919-1F  | RLK-Pelle_RLCK-XII-1 | PK |
| F01_cb9994_c20/flp1/2821-0F  | RLK-Pelle_RLCK-XII-1 | PK |
| F01_cb9994_c20/flp1/2821-2F  | RLK-Pelle_RLCK-XII-1 | PK |
| F01_cb9994_c24/flp0/4896-1F  | RLK-Pelle_RLCK-XII-1 | PK |
| F01_cb9994_c34/flp0/2587-0F  | RLK-Pelle_RLCK-XII-1 | PK |
| F01_cb9994_c34/flp0/2587-1F  | RLK-Pelle_RLCK-XII-1 | PK |
| F01_cb9994_c37/flp1/1933-2F  | RLK-Pelle_RLCK-XII-1 | PK |
| F01_cb9994_c44/flp0/2263-0F  | RLK-Pelle_RLCK-XII-1 | PK |
| F01_cb9994_c45/flp0/2003-1F  | RLK-Pelle_RLCK-XII-1 | PK |
| F01_cb9994_c47/flp1/2004-2F  | RLK-Pelle_RLCK-XII-1 | PK |
| F01_cb9994_c49/flp0/2031-2F  | RLK-Pelle_RLCK-XII-1 | PK |
| F01_cb9994_c53/flp0/1698-1F  | RLK-Pelle_RLCK-XII-1 | PK |
| F01_cb9994_c54/flp0/1505-1F  | RLK-Pelle_RLCK-XII-1 | PK |
| F01_cb9994_c56/f41p2/2058-0F | RLK-Pelle_RLCK-XII-1 | PK |
| F01_cb9994_c57/f4p0/1785-0F  | RLK-Pelle_RLCK-XII-1 | PK |
| F01_cb9994_c60/flp1/1928-0F  | RLK-Pelle_RLCK-XII-1 | PK |
| F01_cb99_c10/flp0/4693-1F    | TKL-PI-6             | PK |
| F01_cb99_c11/flp1/3412-1F    | TKL-PI-6             | PK |

---

---

|                           |          |    |
|---------------------------|----------|----|
| F01_cb99_c12/flp0/3017-0F | TKL-Pl-6 | PK |
| F01_cb99_c12/flp0/3017-2F | TKL-Pl-6 | PK |
| F01_cb99_c13/flp0/2256-1F | TKL-Pl-6 | PK |
| F01_cb99_c3/flp1/4977-1F  | TKL-Pl-6 | PK |
| F01_cb99_c4/flp1/4938-1F  | TKL-Pl-6 | PK |
| F01_cb99_c6/flp0/4955-1F  | TKL-Pl-6 | PK |
| F01_cb99_c7/flp0/3479-0F  | TKL-Pl-6 | PK |
| F01_cb99_c7/flp0/3479-1F  | TKL-Pl-6 | PK |
| F01_cb99_c8/flp1/4787-2F  | TKL-Pl-6 | PK |

---
