# Supplementary material for: Single-molecule long-read sequencing of the full-length transcriptome of Rhododendron lapponicum L
Source: PubMed Central journal article supplement (PMC7174332; doi:10.1038/s41598-020-63814-x), 2020-04-21
Supplement: 41598_2020_63814_MOESM5_ESM.pdf [file 41598_2020_63814_MOESM5_ESM.pdf]

# Single-molecule long-read sequencing of the full-length transcriptome of *Rhododendron lapponicum* L.

Xinping Jia, Ling Tang, Xueying Mei, Huazhou Liu, Hairong Luo, Yanming Deng, Jiale Su

Institute of Leisure Agriculture, Jiangsu Academy of Agricultural Sciences, Jiangsu Key Laboratory for Horticultural Crop Genetic Improvement, Nanjing 210014, China































---

K16329+K16329+K16329+K16329+K16329+K03011+K03011+K03011+K03011+K14641+K14641+K00876+K01464+K01464+K03024+K03025+K03025+K02320+K02320+K02320+K00940+K00940+K00940+K00940+K00940+K00940+K00940+K00940+K00940+K00940+K00940+K00940+K00940+K01431+K01431+K01431+K01431+K01431+K00940+K03040+K03020+K03020+K13800+K13800+K03013+K03013+K02328+K03025+K03025+K03025+K03505+K03505+K03505+K00761+K00761+K01489+K01489+K03013+K03014+K03014+K03019+K03007+K03016+K03016+K03013+K03013+K00940+K00940+K03012+K03012+K03012+K02685+K03506+K03002+K03002+K03002+K03002+K03013+K03013+K03013+K02684+K02684+K00609+K00609+K03000+K03000+K10808+K03021+K03021+K03021+K02325+K02325+K00940+K00940+K02326+K02999+K02999+K02999+K02999+K02999+K01081+K01081+K03021+K03021+K03021+K03021+K03021+K03021+K03021+K01240+K01240+K01240+K01240+K01240+K01240+K02327+K02327+K02327+K02327+K03010+K03010+K03010+K03010+K03010+K03010+K03010+K03010+K03010+K09903+K00857+K00857+K00857+K14721+K14721+K14721+K14721+K14721+K14721+K14721+K14721+K14721+K14721+K00962+K00962+K00962+K00962+K00962+K03014+K03014+K03014+K03014+K03014+K03014+K01955+K01955+K01955+K01955+K01955+K01955+K01955+K01955+K01955+K01955+K01955+K01955+K01955+K01955+K03006+K03006+K03006+K03006+K03006+K00384+K00384+K00384+K00384+K10807+K10807+K03043+K03043+K13421+K13421+K13421+K13421+K13421+K00876+K00876+K00876+K00876+K00876+K00876+K00876+K00876+K00876+K00876+K00876+K00876+K00876+K00876+K00876+K00876+K00876+K00876+K00876+K13998+K13998+K13998+K13998+K13998+K13998+K13998+K13998+K13998+K13998+K13998+K13998+K01937+K01937+K01937+K01937+K01937+K01937+K01937+K01937+K00207+K00207+K00207+K00207+K00207+K00207+K00207+K00207+K00207+K00207+K02335+K02335+K02335+K03013+K03504+K03504+K03504+K03787+K03787+K03787+K03787+K00962+K14641+K14641+K00761+K01464+K01464+K01464+K01489+K01464+K01464+K01464+K01464+K01464+K01464+K01464+K01464+K01464+K14641+K14641+K01464+K14641+K14641+K01464+K14641+K01464+K14641+K01464+K00962+K02327+K01464+K00962+K00962+K03040+K03040+K03040+K03040+K03040+K03040+K00962+K00761+K03018+K01937+K03018+K03040+K00962+K14641+K14641+K03043+K03046+K13800+K13800+K13800+K13800+K13800+K13800+K13800+K13800+K03007+K03007+K03007+K03007+K03012+K03012+K03012+K03012+K03023+K01937+K01937+K00254+K00254+K00254+K02325+K02325+K02325+K02325+K02325+K01956+K01956+K01956+K03787+K03787+K03787+K03787+K03787

Alanine, aspartate ko00250 211  
and glutamate  
metabolism

K00261+K00261+K14454+K14454+K14454+K14454+K14454+K14455+K14455+K14455+K01915+K13566+K13566+K13566+K00811+K00811+K00811+K16871+K00827+K00827+K01940+K01940+K01940+K01940+K00814+K00814+K01580+K01580+K01580+K00609+K00609+K01755+K01755+K01755+K01755+K01755+K01755+K01755+K01755+K01755+K01755+K01755+K01755+K01940+K01940+K01940+K01940+K01940+K01940+K00261+K00261+K00261+K01915+K01915+K01915+K01915+K01915+K01915+K01915+K01915+

---





















---

|                               |         |     |                                                                                                                                                                                                                                                                                                                                                                                                                                                                                                                                                                                                                                                                                                                                                                                                                                                                                                                                                                                                                                                                                                                                                                                                                                                                                                                                                                                                                                                                                 |
|-------------------------------|---------|-----|---------------------------------------------------------------------------------------------------------------------------------------------------------------------------------------------------------------------------------------------------------------------------------------------------------------------------------------------------------------------------------------------------------------------------------------------------------------------------------------------------------------------------------------------------------------------------------------------------------------------------------------------------------------------------------------------------------------------------------------------------------------------------------------------------------------------------------------------------------------------------------------------------------------------------------------------------------------------------------------------------------------------------------------------------------------------------------------------------------------------------------------------------------------------------------------------------------------------------------------------------------------------------------------------------------------------------------------------------------------------------------------------------------------------------------------------------------------------------------|
| hypotaurine<br>metabolism     |         |     | K10712+K10712+K01580+K01580+K01580+K01580+K01580+K10712+K10712+K10712+K10712                                                                                                                                                                                                                                                                                                                                                                                                                                                                                                                                                                                                                                                                                                                                                                                                                                                                                                                                                                                                                                                                                                                                                                                                                                                                                                                                                                                                    |
| Selenocompound<br>metabolism  | ko00450 | 122 | K00384+K00384+K00384+K13811+K01761+K01761+K01761+K01761+K01761+K01761+K01761+K01761+K01761+K01761+<br>K01761+K00549+K00549+K08247+K08247+K08247+K08247+K08247+K08247+K08247+K13811+K13811+K13811+K13811+K13811+<br>K13811+K01760+K01760+K01760+K01760+K01739+K01739+K01739+K01739+K01739+K01739+K01739+K01739+K01739+<br>K01739+K01739+K00384+K00384+K00384+K00384+K11717+K11717+K11717+K11717+K11717+K11717+K00549+K00549+K00549+<br>K00549+K00549+K00549+K00549+K00549+K00549+K00549+K00549+K00549+K00549+K00549+K00549+K00549+K00549+<br>K00549+K00549+K00549+K00549+K00549+K00549+K00549+K00549+K00549+K00549+K00549+K00549+K00549+K00549+<br>K00549+K00549+K00549+K00549+K00549+K01874+K01874+K01874+K01874+K01874+K01874+K01874+K01874+K01874+<br>K01874+K01874+K01874+K01874+K01874+K01874+K01874+K01874+K01874+K01874+K01761+K01761+K01761+K01761+K13811+<br>K13811+K13811                                                                                                                                                                                                                                                                                                                                                                                                                                                                                                                                                                                              |
| Cyanoamino acid<br>metabolism | ko00460 | 224 | K01455+K01455+K01455+K01455+K01455+K01455+K13034+K13034+K13034+K01188+K01188+K01188+K01188+K01188+K01188+<br>K13035+K13035+K13035+K13035+K13035+K13034+K13034+K01188+K05350+K05350+K05350+K05350+K01188+K01188+K01188+<br>K01188+K05349+K05350+K05350+K01188+K05349+K05349+K05350+K05350+K05350+K05350+K05350+K05350+K05349+<br>K05349+K05349+K05349+K01188+K01188+K01188+K01188+K01188+K01188+K01188+K01188+K01188+K01188+<br>K01188+K01188+K00600+K00600+K00600+K00600+K00600+K00600+K18592+K18592+K18592+K18592+K18592+K18592+K18592+<br>K18592+K01188+K01188+K01188+K01188+K01188+K01188+K01188+K01188+K00600+K00600+K00600+K00600+K00600+<br>K00600+K05349+K05349+K05349+K05350+K05349+K05349+K05349+K01188+K01188+K01188+K01188+K01188+K01188+<br>K01188+K05349+K01188+K05349+K05349+K01188+K05349+K01188+K01188+K01188+K01188+K05349+K05349+K05350+<br>K01188+K01188+K01188+K05350+K05349+K01188+K05349+K01188+K05349+K01188+K01188+K05349+K01188+K01188+<br>K01188+K01188+K05349+K01188+K05349+K05349+K05349+K05349+K01188+K05349+K05349+K05349+K05349+K05349+<br>K05349+K05349+K05349+K05349+K05349+K05349+K05349+K05349+K05349+K05350+K05349+K05349+K05349+K13035+<br>K13035+K05350+K05349+K05349+K05349+K05349+K00600+K00600+K00600+K00600+K00600+K00600+K00600+K00600+<br>K00600+K00600+K00600+K00600+K00600+K00600+K01188+K01188+K01188+K01188+K01188+K01188+K01188+K01188+<br>K01188+K01188+K01188+K01188+K01188+K01188+K00600+K00600+K00600+K01188+K01188+K01188 |

---

|                                  |         |     |                                                                                                                                                                                                                                                                                                                                                                                                                                                                                                                                                                                                                                                                                                                                                                                                                                                                                                                                                                                                                                                                                                                                                                                                                                                                                                                                                                                                                                                                                                                                                                                                                                                                                                                                                                                                                                                                                                                                                                                                                                                                                                                                                                                                                                                                                                                                                                                                                                          |
|----------------------------------|---------|-----|------------------------------------------------------------------------------------------------------------------------------------------------------------------------------------------------------------------------------------------------------------------------------------------------------------------------------------------------------------------------------------------------------------------------------------------------------------------------------------------------------------------------------------------------------------------------------------------------------------------------------------------------------------------------------------------------------------------------------------------------------------------------------------------------------------------------------------------------------------------------------------------------------------------------------------------------------------------------------------------------------------------------------------------------------------------------------------------------------------------------------------------------------------------------------------------------------------------------------------------------------------------------------------------------------------------------------------------------------------------------------------------------------------------------------------------------------------------------------------------------------------------------------------------------------------------------------------------------------------------------------------------------------------------------------------------------------------------------------------------------------------------------------------------------------------------------------------------------------------------------------------------------------------------------------------------------------------------------------------------------------------------------------------------------------------------------------------------------------------------------------------------------------------------------------------------------------------------------------------------------------------------------------------------------------------------------------------------------------------------------------------------------------------------------------------------|
| Glutathione<br>metabolism        | ko00480 | 321 | K00797+K00797+K00797+K00797+K00797+K00797+K00797+K00799+K00799+K00799+K00799+K00434+K00434+K00432+K00432+<br>K00432+K00432+K00432+K00432+K00033+K00799+K00799+K00799+K00799+K00797+K00797+K00797+K00797+K00797+K00797+<br>K00797+K00797+K00434+K00434+K00434+K00434+K00434+K00434+K00434+K00434+K00434+K00434+K00434+K00434+K00434+<br>K00434+K00434+K00799+K00031+K00031+K00031+K00031+K00031+K00031+K00031+K00031+K00031+K00031+K00432+K00432+K00432+K00434+<br>K00434+K00434+K00434+K00434+K00434+K00434+K00434+K00434+K00434+K00434+K00434+K00434+K00434+K00434+K00434+<br>K00434+K00434+K00033+K00033+K00033+K00033+K00033+K00033+K00033+K00799+K00799+K00799+K00799+K00799+K00799+<br>K00799+K00799+K01581+K01581+K01581+K00434+K00799+K00799+K00799+K00799+K00799+K00799+K00799+K00799+K00799+<br>K00799+K00036+K00799+K00799+K00799+K00799+K00432+K00432+K00799+K00799+K00799+K00434+K00434+K00799+K00799+<br>K00799+K00799+K00799+K00799+K00799+K00799+K10808+K00799+K00799+K01581+K01255+K00799+K00799+K00799+<br>K00799+K00799+K00799+K01919+K00434+K00434+K00434+K00434+K00434+K00434+K01469+K01469+K01469+K01469+K01469+<br>K00036+K00036+K00036+K00036+K00036+K00036+K00036+K00036+K00036+K00036+K00036+K00036+K00036+K00036+K00036+<br>K00036+K00036+K00036+K00036+K00036+K00432+K00432+K00432+K00432+K00799+K00799+K00799+K00799+K00799+K00799+<br>K00799+K00799+K00799+K00799+K10807+K10807+K00799+K00036+K00036+K00036+K00036+K00036+K00036+K00036+K00036+<br>K00036+K01920+K01920+K01920+K01920+K00434+K00434+K00434+K00799+K18592+K18592+K18592+K18592+K18592+K18592+<br>K18592+K18592+K18592+K01919+K01919+K01919+K01919+K01919+K01919+K01919+K01919+K01919+K01919+K00383+K00383+K00383+<br>K00383+K00383+K00383+K00432+K00432+K00432+K00432+K00432+K00432+K00432+K00036+K00036+K00036+K00036+<br>K00036+K00036+K00036+K00799+K00799+K01255+K00036+K00036+K00434+K00434+K00031+K00031+K01255+K01255+K00036+K01255+<br>K01255+K00797+K01255+K01255+K01255+K01256+K00383+K01256+K01256+K01256+K00036+K00383+K00036+K00799+K00036+<br>K00799+K01256+K00036+K01256+K00036+K00036+K01256+K01255+K01256+K01256+K01256+K01256+K00797+K00797+K00797+<br>K01255+K01256+K01256+K01256+K00031+K01255+K01256+K01256+K00797+K01256+K01256+K01256+K01256+K00031+K01256+<br>K00383+K00434+K01256+K01256+K00434+K00036+K00036+K00031+K00799+K00799+K00799+K00434+K00434+K00434+K00434+<br>K00434+K00031+K00031+K00033+K00033+K00033 |
| Starch and sucrose<br>metabolism | ko00500 | 839 | K08679+K08679+K08679+K08679+K08679+K01176+K01176+K01176+K01176+K01177+K00847+K00847+K00847+K00847+K01051+<br>K01051+K01051+K00975+K01188+K01188+K01188+K01188+K01179+K00963+K00963+K00963+K00963+K08679+K08679+K01188+<br>K01188+K01835+K16055+K16055+K16055+K16055+K16055+K16055+K16055+K16055+K16055+K16055+K16055+K16055+K16055+K1177+K1177+K1177+<br>K01177+K01177+K01177+K01177+K01177+K01177+K01188+K13648+K13648+K13648+K13648+K13648+K13648+K13648+K13648+K13648+K13648+K05350+K05350+                                                                                                                                                                                                                                                                                                                                                                                                                                                                                                                                                                                                                                                                                                                                                                                                                                                                                                                                                                                                                                                                                                                                                                                                                                                                                                                                                                                                                                                                                                                                                                                                                                                                                                                                                                                                                                                                                                                                           |



---

K05349+K00705+K00700+K00700+K00705+K01810+K05349+K00688+K05349+K01188+K00695+K01188+K01188+K01188+K01835+K00700+K01188+K01188+K01188+K01188+K01810+K05349+K00705+K01188+K05349+K01810+K05349+K00695+K01188+K01187+K01835+K00844+K00705+K05349+K01188+K01188+K00844+K01188+K01188+K01188+K05349+K01810+K05349+K05350+K01188+K01188+K01188+K05350+K05349+K01188+K05349+K01188+K01835+K05349+K01810+K01188+K01188+K05349+K00700+K01188+K01188+K00844+K01835+K01188+K00975+K00700+K01188+K01188+K05349+K00705+K01188+K00844+K05349+K01810+K01810+K01810+K01810+K00700+K01835+K01810+K00696+K01187+K01810+K05349+K05349+K01188+K01810+K00695+K00700+K00844+K05349+K00844+K00696+K01810+K05349+K05349+K05349+K00700+K00700+K00700+K00700+K00700+K00975+K01835+K01187+K01810+K00705+K00705+K00705+K00705+K00695+K05350+K05349+K01810+K00700+K01835+K05349+K05349+K00695+K00695+K05349+K00695+K05349+K05349+K01187+K01188+K01835+K01835+K01835+K01835+K01835+K01835+K01835+K01835+K01835+K01835+K01835+K00695+K01835+K05349+K01835+K01835+K01835+K01835+K01835+K01835+K01835+K01187+K00700+K00975+K05349+K00705+K05349+K05349+K01810+K00700+K00700+K00695+K01188+K00695+K00695+K05350+K00705+K00700+K01187+K00975+K00844+K00844+K00844+K00844+K00844+K00844+K00844+K00844+K00844+K00844+K00844+K00844+K00844+K00844+K05349+K05349+K05349+K05349+K05349+K05349+K05349+K05349+K05349+K05349+K05349+K05349+K05349+K00695+K00700+K01187+K00695+K00700+K00700+K05350+K00695+K00695+K00695+K00700+K00695+K00695+K00700+K00695+K00695+K00700+K00696+K05349+K00696+K00696+K00696+K00696+K00696+K00696+K00696+K00696+K00696+K00696+K00696+K00696+K00696+K00696+K00696+K00696+K00696+K00696+K00696+K00696+K00696+K00700+K01835+K01835+K00696+K05349+K01835+K00705+K00695+K01810+K16055+K16055+K05349+K00688+K00695+K00695+K00700+K16055+K00695+K16055+K00844+K00695+K00688+K00688+K00700+K01810+K01810+K00705+K00700+K01810+K16055+K16055+K00688+K16055+K00844+K00688+K00700+K05349+K01810+K16055+K16055+K00700+K01176+K16055+K00688+K00700+K00695+K00688+K00688+K00695+K16055+K01810+K01176+K00695+K00695+K01810+K00695+K01810+K00695+K00700+K00705+K05350+K00700+K16055+K00688+K00688+K00844+K16055+K05349+K00700+K05349+K13648+K01187+K01810+K00688+K00695+K00700+K00844+K00688+K00695+K00695+K00705+K01187+K05349+K00975+K00700+K00700+K05349+K00696+K01051+K01051+K01051+K01051+K01188+K01188+K16055+K16055+K16055+K16055+K16055+K16055+K16055+K01188+K01188+K01188+K01188+K01188+K01188+K01188+K01188+K01194+K01194+K01194+K01194+K01194+K01194+K01194+K01188+K01188+K01051+K01051+K01193+K01193+K01193+K01193+K01193+K01193+K08679+K08679+K08679+K00847+K00847+K00847+K01188+K01188+K01188+K00012+K00012+K00012+K00012+K00012+K00012+K00012+K00012+K01051+K01051+K01051+K01051+K01051+K01051+K01051+K01051+K01051+K01051+K00963+K00963+K00963+K00963+K01188+K01188+K01188

---







---

K07407+K07407+K14085+K14085+K14085+K14085+K14085+K14085+K14085+K14085+K14085+K14085+K14085+K14085+K14085+K14085+K14085+K14085+K14085+K14085+K14085+K14085+K14085+K14085+K14085+K14085+K14085+K14085+K14085+K14085+K14085+K14085+K14085+K06118+K00679+K00679+K00901+K13523+K13523+K13523+K13523+K13523+K13523+K00901+K00901+K00864+K00864+K00864+K00864+K00864+K06119+K06119+K06119+K06119+K13508+K13508+K13508+K13508+K00128+K00128+K00128+K00128+K00128+K00128+K00128+K00128+K00128+K00128+K15728+K15728+K15728+K15728+K15728+K15728+K15728+K15918+K15918+K15918+K15918+K15918+K15918+K15918+K15918+K15918+K15918+K09480+K09480+K09480+K09480+K09480+K09480+K09480+K09480+K13513+K13513+K13513+K00128+K00128+K00128+K00128+K00128+K00128+K00128+K00128+K00128+K00128+K00128+K00128+K00128+K00128+K15728+K15728+K15728+K15728+K15728+K15728+K15728+K15728+K00901+K00901+K00901+K00901+K13506+K13506+K13506+K13506+K13506+K13506+K13506+K13506+K13506+K13506+K00679+K00679+K00679+K00679+K00679+K00679+K00679+K00679+K00679+K00679+K00679+K00679+K00679+K00679+K00679+K00679+K00679+K00679+K00679+K11155+K11155+K11155+K00128+K00128+K00128+K00128+K00128+K00128+K00128+K00128+K00128+K00128+K00128+K00128+K00128+K00128+K07407+K07407+K00128+K00128+K00128+K00128+K00128+K00128+K09480+K09480+K09480+K09480+K09480+K09480+K09480+K09480+K09480+K09480+K09480+K14674+K14674+K14674+K14674+K14674+K14674+K14674+K14674+K14674+K14674+K14674+K14674+K14674+K00901+K00901+K03715+K00901+K00901+K00901+K00128+K00901+K06119+K00901+K00901+K00901+K00128+K06119+K00863+K03715+K00901+K03715+K00901+K00901+K00901+K00901+K03715+K00901+K06119+K00901+K07407+K06118+K00901+K00901+K00901+K00863+K06118+K00128+K00128+K00863+K00901+K00128+K00901+K00901+K00901+K00901+K06118+K06118+K00863+K00128+K07407+K00863+K00901+K00863+K00901+K00901+K00901+K13523+K00863+K00901+K00901+K00901+K00901+K00901+K00901+K00901+K00901+K00901+K00863+K00901+K00901+K00901+K00901+K00901+K00901+K00901+K00901+K00128+K00128+K00128+K13508+K13508+K03715+K03715+K03715+K03715+K07407+K07407+K07407+K07407+K13508+K13508+K13508+K13508

Inositol phosphate ko00562 242  
metabolism

K00913+K00913+K00913+K00913+K00913+K01803+K01803+K01803+K01803+K01803+K01803+K01803+K01803+K00915+K00915+K00915+K00913+K00913+K00469+K00469+K00469+K00469+K00469+K00469+K00921+K00921+K00921+K00921+K00921+K00921+K00921+K00921+K00921+K00921+K01114+K10572+K10572+K10572+K10572+K10572+K00921+K00921+K00921+K00921+K00921+K00921+K00921+K00921+K15422+K15422+K01803+K01803+K01803+K01114+K01114+K01092+K01092+K00999+K00999+K00999+K00999+K00999+K00999+K00999+K00999+K00913+K01110+K01110+K01110+K01110+K01110+K01110+K01110+K01803+K01803+K01803+K01803+K01803+K01803+K01803+K01803+K01803+K01803+K01803+K01803+K01803+K01803+K01803+K01803+K01803+K00889+K00889+K00889+K00889+K00889+K00889+K00889+K00889+K01106+K01106+K00889+K00889+K00889+K00889+K00140+K00140+K00140+K00140+K00140+K00140+K00140+K00140+K00914+K00914+K

---























---

|                                      |         |     |                                                                                                                                                                                                                                                                                                                                                                                                                                                                                                                                                                                                                                                                                                                                                                                                                                                                                                                                                                                                                                                                                                                                                                                                                                                                                   |
|--------------------------------------|---------|-----|-----------------------------------------------------------------------------------------------------------------------------------------------------------------------------------------------------------------------------------------------------------------------------------------------------------------------------------------------------------------------------------------------------------------------------------------------------------------------------------------------------------------------------------------------------------------------------------------------------------------------------------------------------------------------------------------------------------------------------------------------------------------------------------------------------------------------------------------------------------------------------------------------------------------------------------------------------------------------------------------------------------------------------------------------------------------------------------------------------------------------------------------------------------------------------------------------------------------------------------------------------------------------------------|
| Biotin metabolism                    | ko00780 | 40  | K01652+K01652+K01652+K01653+K01653<br>K00059+K00059+K00059+K00059+K00059+K09458+K00208+K00208+K00208+K00208+K01942+K01942+K01942+K00059+K00059+<br>K02372+K02372+K00208+K00208+K00208+K01012+K00059+K00059+K00059+K00059+K00833+K00833+K01942+K01942+K09458+<br>K09458+K09458+K09458+K09458+K09458+K00652+K00652+K09458+K09458+K09458                                                                                                                                                                                                                                                                                                                                                                                                                                                                                                                                                                                                                                                                                                                                                                                                                                                                                                                                             |
| Lipoic acid metabolism               | ko00785 | 12  | K03801+K03801+K03801+K03801+K03644+K03644+K03644+K03644+K03644+K03644+K03644+K03644                                                                                                                                                                                                                                                                                                                                                                                                                                                                                                                                                                                                                                                                                                                                                                                                                                                                                                                                                                                                                                                                                                                                                                                               |
| Folate biosynthesis                  | ko00790 | 67  | K01307+K01307+K01307+K01307+K01307+K01307+K18482+K18482+K18482+K13950+K13950+K13950+K13950+K01495+K01113+<br>K01113+K01113+K01307+K01307+K03635+K03635+K01633+K01633+K01633+K01633+K01633+K01633+K03635+K03635+<br>K03635+K03635+K01930+K01930+K01930+K01930+K01930+K01930+K01930+K01930+K01930+K13998+K13998+K13998+K13998+<br>K13998+K13998+K13998+K13998+K13998+K13998+K13998+K13941+K13941+K13941+K01930+K01930+K01930+K01930+K01930+<br>K01930+K01930+K01495+K01495+K01495+K01495+K01495                                                                                                                                                                                                                                                                                                                                                                                                                                                                                                                                                                                                                                                                                                                                                                                     |
| Porphyrin and chlorophyll metabolism | ko00860 | 167 | K04040+K04040+K04040+K04040+K04040+K02257+K02257+K00510+K00510+K00510+K00510+K00510+K00228+K00228+K00228+<br>K00228+K01599+K01599+K01599+K01599+K01599+K01698+K10960+K10960+K10960+K10960+K00218+K00218+K00218+K00218+<br>K13606+K01749+K01749+K04035+K00218+K01599+K01599+K08099+K02257+K01885+K00218+K00218+K02259+K02259+K13545+<br>K03404+K03404+K03404+K03404+K03404+K03404+K03404+K03403+K03403+K03403+K03403+K03403+K03403+K03403+K18010+<br>K18010+K18010+K18010+K13600+K13600+K13600+K13600+K01885+K01885+K01885+K01885+K01885+K01885+K01885+K01885+<br>K01885+K01885+K01885+K01885+K01885+K01885+K01885+K01885+K10960+K10960+K13545+K13545+K08099+K08099+K08099+K08099+<br>K08099+K00231+K00231+K00231+K00231+K00231+K00231+K00231+K00231+K00231+K00218+K00218+K00218+K00218+K00218+K00218+<br>K00218+K00218+K00218+K00218+K00218+K00218+K04035+K04035+K04035+K04035+K04035+K02492+K02492+K02492+K02492+K02492+<br>K02492+K13606+K13606+K03405+K03405+K03405+K00231+K00231+K00231+K01845+K01845+K01845+K01772+K01772+K01772+<br>K01772+K01772+K01772+K01772+K13606+K13071+K13071+K13606+K01885+K13071+K01885+K13071+K13071+K01772+K01885+<br>K13071+K13606+K13606+K01885+K01885+K01772+K01885+K01885+K01772+K01772+K02492+K02492+K01719+K01719+K01719+<br>K01719+K01719 |
| Terpenoid backbone biosynthesis      | ko00900 | 210 | K05356+K03527+K03527+K13789+K13789+K13789+K13789+K13789+K13789+K13789+K13789+K13789+K00991+K00991+K01597+K01597+K01597+<br>K00869+K00869+K00869+K00869+K00869+K00869+K00869+K00919+K00919+K05906+K05906+K15891+K00021+K14066+K01823+K01823+<br>K01823+K01823+K01823+K10960+K10960+K10960+K10960+K00099+K13789+K13789+K13789+K05955+K05955+K05955+K01770+                                                                                                                                                                                                                                                                                                                                                                                                                                                                                                                                                                                                                                                                                                                                                                                                                                                                                                                          |

---















---

Carbon  
metabolism

ko01200 1378

K10256+K10256+K10256+K10256+K00232+K00232+K00232+K00232+K00232+K00232+K00232+K00232+K07513+K07513+K07513+K07513+K07513+K07513+K07513+K07513+K00232+K07513+K10257+K10257+K10257+K10257+K10257+K10257+K10257+K00161+K00161+K00161+K00161+K01455+K01455+K01455+K01455+K01455+K01455+K01455+K00236+K00855+K00855+K00855+K00855+K00855+K00927+K00927+K00927+K00927+K00235+K00235+K00235+K00235+K00235+K00235+K13034+K13034+K13034+K13034+K01623+K01623+K01623+K01623+K01623+K01623+K01623+K00121+K00121+K00121+K00121+K00121+K00121+K00121+K00121+K01803+K01803+K01803+K01803+K01803+K01803+K01803+K01803+K01803+K00616+K00616+K00616+K00616+K00616+K00616+K00616+K00616+K00616+K00640+K00640+K00640+K00640+K00121+K00121+K02160+K02160+K02160+K02160+K00033+K05605+K05605+K05605+K14454+K14454+K14454+K14454+K14454+K14454+K01738+K01738+K01738+K01738+K00122+K00122+K01057+K01057+K00030+K00030+K14455+K14455+K14455+K01807+K01807+K01807+K15634+K15634+K05605+K05605+K05605+K05605+K01689+K00030+K00030+K00030+K00030+K00030+K00030+K00030+K00025+K00025+K00025+K00025+K00025+K00025+K00025+K00025+K00025+K00025+K00025+K01623+K01623+K01623+K01623+K01623+K01623+K01623+K01623+K01623+K01623+K01623+K01623+K01623+K13034+K13034+K00031+K00031+K00031+K00031+K00031+K00031+K00031+K00031+K00029+K00927+K00927+K00927+K00927+K00927+K00927+K00026+K00026+K00026+K00026+K00026+K00026+K00026+K00026+K01057+K00162+K00162+K00162+K00162+K00162+K00162+K00162+K00162+K01738+K01738+K01738+K01738+K01738+K01738+K01738+K01738+K01738+K01738+K01738+K01738+K01738+K01738+K01738+K01738+K01079+K01079+K01070+K01070+K01070+K01070+K01623+K01623+K01623+K01623+K01623+K01623+K01623+K01623+K01623+K01623+K01623+K01623+K01623+K01623+K01623+K00616+K00616+K01602+K01602+K01602+K01602+K01602+K01602+K01602+K01602+K01602+K01602+K01602+K01602+K01602+K01057+K01057+K00033+K00033+K00033+K00033+K00033+K00033+K00161+K00025+K01602+K01602+K01602+K01602+K01602+K01602+K01602+K01602+K01602+K01057+K01057+K01057+K01057+K01057+K01783+K01783+K01783+K05605+K05605+K05605+K00026+K00026+K00026+K01595+K01595+K00640+K00640+K01738+K01738+K01738+K00640+K00640+K05605+K05605+K05605+K00873+K01803+K01803+K01803+K00121+K00121+K00131+K00131+K00131+K00851+K00851+K01679+K00605+K00605+K00626+K00626+K00626+K00626+K00626+K00626+K00831+K00831+K00831+K03841+K03841+K01807+K01807+K01807+K05298+K05298+K05298+K05298+K05298+K05298+K05298+K00051+K00051+K00051+K00051+K00161+K00161+K00036+K01834+K01834+K01834+K01834+K01963+K00025+K00025+K00058+K00850+K05605+K05605+K05605+K05605+K05605+K05605+K05605+K05605+K05605+K00058+K00058+K00058+K00058+K00058+K00058+K00058+K00058+K00058+K00058+K00058+K01057+K01057+K01057+K01810+K01810+K00121+K00121+K00814+K00814+K00026+K00026+K00026+K00026+K00616+K01738+K00121+K00121+K00121+K01623+K01623+K00030+K00030+K01899+K01899+K01899+

---



---

K01647+K01647+K01647+K03841+K03841+K03841+K03841+K03841+K03841+K03841+K00850+K00850+K00850+K00850+K00850+K00850+K00850+K00850+K00850+K00850+K01938+K01938+K01938+K01938+K01938+K01938+K01938+K01938+K01938+K00948+K00948+K00297+K00297+K00297+K00297+K00297+K00297+K00600+K00600+K00600+K00600+K00600+K00600+K00600+K00051+K01754+K01754+K01754+K00382+K00382+K00382+K00382+K18121+K18121+K00030+K00030+K00030+K00814+K00036+K00036+K00036+K00036+K00036+K00036+K00029+K01810+K00627+K00281+K00281+K00873+K00873+K00873+K00814+K00814+K00814+K01595+K01595+K00051+K00134+K01623+K00029+K00036+K00234+K01595+K00036+K01595+K00873+K01595+K01595+K01810+K00627+K00029+K01595+K00134+K01810+K00134+K01595+K00051+K00844+K01595+K00031+K00873+K01610+K01610+K00134+K00844+K00134+K00030+K01610+K00850+K00605+K00031+K01610+K01610+K01623+K01595+K01610+K00850+K01595+K01610+K01610+K00873+K01610+K01610+K01595+K00627+K01738+K00873+K01810+K01623+K01681+K00029+K00873+K00029+K01738+K01963+K00036+K00863+K05298+K00134+K01595+K01738+K00029+K01810+K01623+K01595+K00134+K00873+K01595+K00134+K00234+K00134+K00134+K01595+K05298+K00873+K00873+K01595+K01595+K00844+K01595+K01601+K01679+K00134+K00850+K00873+K01595+K01595+K00134+K00844+K00051+K01595+K00249+K01810+K01810+K01810+K01810+K01810+K00029+K01681+K01810+K00029+K01810+K00873+K00029+K00873+K00051+K00844+K00164+K00029+K01610+K00140+K01681+K00844+K00164+K00029+K00029+K00029+K01595+K00051+K01595+K00873+K00029+K01810+K00029+K00029+K00234+K00164+K00029+K00140+K00863+K00873+K00234+K00029+K00234+K01895+K00873+K01681+K01810+K00140+K01738+K00051+K00036+K00029+K00030+K00030+K00029+K00029+K00627+K01895+K01810+K00036+K00029+K00029+K00029+K00029+K00029+K00029+K00029+K00029+K00029+K00029+K00281+K00029+K00029+K00029+K00029+K01679+K01679+K00873+K01679+K01679+K01679+K01679+K01679+K01679+K01679+K01679+K00863+K00029+K00029+K00234+K00850+K00627+K00234+K00234+K00627+K01810+K00036+K00029+K01738+K00029+K00029+K00036+K00036+K00627+K00029+K00029+K00029+K00036+K00844+K00844+K00844+K00844+K00844+K00844+K00844+K00844+K00844+K00844+K00844+K00844+K00844+K00844+K00844+K00844+K00844+K00844+K00844+K00029+K00134+K00627+K00029+K00140+K00140+K00140+K01963+K01963+K01963+K01963+K01963+K00627+K00627+K00029+K01679+K01623+K00029+K01623+K01899+K00029+K00029+K00850+K00029+K00029+K01610+K00863+K00605+K00051+K00029+K00029+K00029+K00029+K00029+K00029+K00029+K00029+K00850+K00031+K01610+K00863+K00234+K01810+K00164+K01681+K01602+K00164+K01895+K00281+K00164+K00140+K00164+K01602+K01602+K00873+K00863+K00164+K00814+K00281+K01681+K05298+K00281+K00627+K01895+K01681+K00164+K00844+K01681+K00164+K00281+K01681+K00627+K00627+K01810+K00873+K00814+K00164+K01810+K01810+K00164+K00164+K01681+K00164+K01681+K00844+K01681+K01895+K01681+K01895+K00164+K01810+K05298+K00140+K00873+K00281+K00164+K01681+K00164+K01681+K00281+

---

---

K01895+K00281+K00627+K01681+K00281+K01681+K00281+K00627+K01681+K01681+K00281+K00164+K01681+K00281+K00164+  
K00031+K01810+K01895+K00281+K05298+K01810+K01681+K00863+K01681+K01810+K00164+K05298+K01681+K01679+K00281+  
K00164+K05298+K01681+K00134+K01681+K01803+K00164+K00627+K01679+K00164+K00844+K01681+K00873+K01681+K01610+  
K00281+K01681+K00281+K00164+K01681+K00627+K01681+K00164+K00164+K00863+K01681+K01810+K00281+K00281+K00873+  
K00844+K01681+K01681+K01681+K01681+K00627+K01602+K00873+K01681+K00281+K00036+K00036+K00031+K00164+K00600+  
K00600+K00600+K00600+K00600+K00600+K00600+K00600+K00600+K00600+K00600+K00600+K00600+K00600+K00600+K00600+  
K00600+K00873+K00873+K00873+K00873+K00873+K00873+K00873+K00873+K00873+K00873+K00873+K00873+K00873+K00873+  
K00873+K00873+K00873+K00873+K00873+K00873+K00873+K00873+K00873+K00873+K00873+K00873+K00122+K00122+  
K00122+K00122+K00122+K00122+K00122+K00122+K01689+K01689+K01689+K01689+K00873+K00873+K00850+K00850+  
K00850+K00850+K00850+K00850+K00850+K00850+K00850+K00850+K00850+K00873+K00873+K00873+K00873+K00873+  
K00873+K00873+K01961+K01961+K01961+K00658+K00658+K00658+K00658+K00658+K00658+K00658+K00658+K01100+K01100+  
K01100+K03841+K03841+K03841+K03841+K03841+K03841+K03841+K01900+K01900+K01900+K01900+K01900+K01900+K00850+  
K01689+K01689+K01689+K01689+K00121+K00121+K00121+K00121+K00121+K00121+K00121+K00121+K00121+K00627+K00627+  
K00627+K00627+K00627+K00627+K00058+K00627+K00627+K00627+K00627+K00627+K00600+K00600+K00600+K00031+K00031+  
K00033+K00033+K00033+K00626+K00626+K00626+K00626+K00626+K00626+K00850+K00850+K00850+K00927+K00927+K00927+  
K00927+K00162+K00162+K00162+K01647+K01647+K01647+K01647+K01647+K01647+K01647+K01647+K01647+K01647

K01438+K01438+K14454+K14454+K14454+K14454+K14454+K00030+K00030+K14455+K14455+K14455+K00133+K00133+K00620+  
K00030+K00030+K00030+K00030+K00030+K00030+K00030+K00031+K00031+K00031+K00031+K00031+K00031+K00031+  
K01703+K01703+K01703+K01703+K00818+K00818+K00818+K00818+K00818+K00811+K00811+K00811+K01438+K01438+K01438+  
K00053+K00826+K00826+K00826+K00826+K00826+K00826+K00826+K00826+K00826+K00826+K00826+K01704+K01704+K01704+  
K01704+K00930+K00930+K00814+K00814+K00052+K00052+K00030+K00030+K11820+K11820+K00818+K00818+K00818+K00818+  
K00928+K00928+K00928+K00928+K00928+K00928+K00928+K00928+K01653+K01653+K01653+K01653+K01653+K01653+K01653+  
K01653+K01703+K01703+K01703+K01703+K01703+K01703+K01703+K01703+K01703+K01703+K01649+K01649+K01649+K01649+  
K01649+K01649+K01649+K01649+K01649+K01649+K01649+K01649+K14454+K14454+K14272+K14272+K14272+K14272+K14272+  
K14272+K14272+K14272+K01647+K00052+K00052+K01687+K01687+K14682+K14682+K14682+K14682+K14682+K01647+K01647+  
K01647+K01647+K01647+K01647+K00030+K00030+K00030+K00814+K00053+K00814+K00053+K00814+K00814+K00928+

---

2-Oxocarboxylic acid metabolism ko01210 234







---

K14272+K14272+K14272+K14272+K00872+K00872+K00789+K00789+K00789+K00789+K00789+K00789+K00789+K00789+K01647+K00052+K00052+K00615+K00615+K01915+K01915+K00615+K00615+K00615+K00615+K00615+K00615+K00615+K00615+K00615+K00615+K00615+K00615+K00615+K00873+K00873+K00873+K00873+K00264+K00264+K00264+K00264+K00264+K00264+K00264+K00264+K00264+K00264+K00264+K00264+K00264+K00873+K00873+K00873+K00873+K00873+K00873+K00873+K00873+K01689+K01689+K01689+K01689+K01689+K01689+K00873+K00873+K00873+K00873+K00766+K00766+K00766+K00766+K00766+K00789+K00789+K00789+K00789+K12657+K12657+K01687+K01687+K00927+K00927+K00927+K00927+K00600+K00600+K00600+K00600+K00600+K00600+K00640+K15633+K15633+K15633+K15633+K15633+K15633+K15633+K15633+K15633+K15633+K15633+K15633+K15633+K15633+K15633+K00789+K00789+K12657+K12657+K13832+K13832+K13832+K13832+K13832+K13832+K14682+K14682+K14682+K14682+K14682+K01783+K01783+K01783+K01647+K01647+K01647+K01647+K01647+K01647+K00850+K00850+K00850+K00850+K00850+K00850+K00850+K00850+K00850+K00850+K00850+K00850+K00850+K00850+K00948+K00948+K00600+K00600+K00600+K00600+K00600+K00600+K00600+K00600+K01817+K11755+K11755+K01754+K01754+K01754+K00030+K00030+K00030+K00814+K00549+K00549+K00549+K00549+K00873+K00873+K00873+K00053+K00814+K00053+K00814+K00815+K00814+K00928+K00815+K00134+K01623+K00815+K00053+K00549+K00053+K00873+K00053+K13832+K00134+K00815+K00815+K00134+K00031+K00873+K00134+K00134+K00030+K01657+K00850+K00031+K00549+K00815+K00053+K01623+K00053+K00850+K00549+K00873+K01657+K01657+K01738+K00815+K00873+K13832+K01623+K01915+K01681+K00873+K01738+K00053+K00815+K01657+K00053+K00134+K01738+K01623+K00134+K00873+K00815+K00928+K00134+K00134+K00134+K01657+K00053+K00789+K00873+K00873+K00815+K00134+K00850+K01620+K00873+K00815+K00928+K00134+K00815+K00549+K00549+K00549+K01681+K01657+K01657+K00873+K00873+K01657+K00549+K01657+K01681+K00873+K00815+K00549+K00815+K00549+K00549+K00873+K00549+K00549+K00873+K01681+K01738+K00549+K00030+K00030+K00549+K01663+K01663+K00815+K00549+K00549+K01663+K00549+K01438+K00873+K01663+K00549+K00549+K00549+K00826+K00850+K01738+K01663+K01663+K00549+K00549+K00134+K01623+K01623+K01657+K01657+K01657+K01657+K01657+K01657+K01657+K01657+K01657+K01657+K01657+K01657+K01657+K01657+K01657+K00850+K01620+K01620+K00850+K00031+K01681+K00873+K00814+K01681+K01663+K01620+K00549+K00549+K01681+K01681+K00549+K01681+K00549+K00873+K00814+K00549+K01681+K01681+K01681+K01681+K00549+K00873+K01681+K01681+K01438+K01681+K01681+K00549+K01681+K01681+K01681+K00031+K00549+K01681+K01681+K01681+K01681+K00134+K01681+K00549+K01803+K01626+K01663+K01681+K00873+K01681+K01663+K05359+K01681+K01663+K01681+K01681+K00826+K01681+K00873+K01681+K01681+K01681+K01681+K00873+K00549+K01681+K00549+K00549+

---





---

K03538+K03538+K03538+K12619+K12619+K12619+K12619+K12619+K12619+K12619+K12619+K12619+K12619+K12619+K12845+K12845+K12845+K12845+K14568+K14568+K14568+K14568+K14568+K14568+K14568+K14568+K14556+K14556+K14556+K14556+K14556+K14556+K06943+K03537+K03537+K14565+K14565+K14565+K14565+K14565+K14565+K14565+K14565+K14565+K14565+K14565+K14550+K14550+K14569+K14544+K14544+K14544+K14544+K14521+K14521+K14521+K14521+K14521+K14521+K14567+K14567+K14567+K14567+K14567+K14567+K14567+K14567+K14567+K14567+K14567+K14567+K14566+K14566+K14566+K14566+K11131+K11131+K11131+K11131+K14558+K14558+K07562+K07562+K07562+K07562+K07562+K07562+K07562+K07562+K12619+K12619+K12619+K12619+K12619+K12619+K12619+K12619+K12619+K12619+K12619+K12619+K12619+K12619+K14573+K14573+K14571+K14571+K14571+K14571+K14571+K14571+K12619+K12619+K12619+K12619+K14546+K14546+K01164+K01164+K01164+K01164+K01164+K01164+K01164+K01164+K03097+K03097+K03097+K03097+K03097+K03097+K03097+K14548+K14548+K14548+K14548+K14548+K14554+K14554+K14554+K03115+K03115+K03115+K03115+K11129+K11129+K11129+K11129+K11129+K11129+K11129+K14546+K14546+K14546+K14546+K14546+K14546+K14546+K14546+K14546+K14546+K14546+K14546+K14546+K13288+K03097+K03097+K03097+K03097+K03097+K14570+K14570+K14570+K14570+K07178+K07178+K07178+K07178+K07178+K14538+K14538+K14538+K14538+K14538+K14538+K14521+K14521+K14549+K14549+K14549+K14563+K14563+K14563+K14563+K12619+K11108+K11108+K11108+K11108+K11108+K11108+K14557+K14557+K14539+K14539+K14539+K14539+K14539+K14539+K14559+K14559+K14559+K14559+K14559+K03539+K14573+K14552+K06943+K14552+K14552+K07179+K06943+K14553+K12619+K14552+K14552+K06943+K14552+K14572+K14552+K12619+K06943+K14552+K06943+K14552+K06943+K14555+K14555+K14555+K14555+K06943+K14568+K14568+K14568+K14568+K14568+K14568+K14568+K14568+K14568+K14568+K14568+K06943+K06943+K14553+K14553+K14555+K07179+K07179+K07179+K07179+K07179+K07179+K07179+K07179+K07179+K07179+K07179+K07179+K14536+K12619+K06943+K14555+K14536+K14570+K14570+K11883+K11883+K11883+K14537+K14537+K14537+K14537+K14564+K14564+K14564+K12619

Ribosome ko03010 946

K02863+K02863+K02863+K02863+K02969+K02969+K02969+K02969+K02903+K02903+K02900+K02900+K02900+K02900+K02900+K02900+K02900+K02872+K02991+K02991+K02991+K02991+K02943+K02943+K02943+K02943+K02943+K02943+K02943+K02872+K02968+K02968+K02968+K02968+K02882+K02882+K02882+K02882+K02939+K02939+K02939+K02939+K02939+K02939+K02996+K02996+K02985+K02985+K02985+K02894+K02894+K02894+K02894+K02894+K02894+K02894+K02894+K02895+K02895+K02918+K02918+K02918+K02909+K02909+K02995+K02995+K02995+K02995+K02995+K02868+K02980+K02980+K02980+K02980+K02980+K02950+K02929+K02929+K02929+K02929+K02929+K02929+K02929+K02876+K02876+K02876+K02876+K02876+K02876+K02876+K02873+K02873+K02873+K02873+K02873+K02873+K02873+

---

---

K02873+K02873+K02873+K02873+K02993+K02896+K02896+K02896+K02896+K02896+K02948+K02948+K02948+K02940+K02940+K02875+K02875+K02875+K02884+K02884+K02884+K02884+K02980+K02980+K02980+K02981+K02981+K02926+K02926+K02926+K02926+K02915+K02915+K02915+K02935+K02935+K02871+K02871+K02871+K02931+K02931+K02931+K02931+K02875+K02875+K02875+K02921+K02921+K02921+K02921+K02890+K02890+K02891+K02891+K02891+K02891+K02946+K02946+K02897+K02897+K02891+K02979+K02979+K02979+K02979+K02932+K02932+K02932+K02932+K02932+K02932+K02932+K02932+K02932+K02932+K02953+K02953+K02953+K02953+K02953+K02893+K02893+K02893+K02898+K02898+K02898+K02898+K02898+K02898+K02898+K02898+K02971+K02993+K02993+K02993+K02993+K02993+K02993+K02993+K02993+K02958+K02958+K02958+K02899+K02899+K02899+K02899+K02955+K02955+K02955+K02955+K02955+K02973+K02973+K02973+K02973+K02985+K02985+K02892+K02920+K02920+K02920+K02935+K02935+K02935+K02891+K02891+K02891+K02891+K02891+K02891+K02919+K02919+K02872+K02872+K02977+K02977+K02977+K02977+K02977+K02936+K02936+K02936+K02936+K02936+K02936+K02936+K02936+K02936+K02936+K02941+K02941+K02941+K02941+K02941+K02941+K02941+K02941+K02941+K02941+K02941+K02888+K02888+K02888+K02888+K02975+K02975+K02975+K02975+K02975+K02975+K02975+K02938+K02938+K02938+K02938+K02938+K02938+K02938+K02938+K02938+K02938+K02938+K02938+K02938+K02938+K02938+K02974+K02974+K02974+K02962+K02962+K02962+K02962+K02934+K02908+K02908+K02953+K02953+K02953+K02980+K02980+K02973+K02973+K02973+K02973+K02973+K02973+K02973+K02973+K02973+K02973+K02905+K02905+K02905+K02905+K02989+K02989+K02989+K02989+K02989+K02989+K02989+K02979+K02925+K02925+K02925+K02925+K02925+K02925+K02925+K02882+K02882+K02882+K02908+K02908+K02901+K02901+K02901+K02901+K02901+K02901+K02901+K02901+K02901+K02984+K02984+K02984+K02984+K02984+K02984+K02984+K02984+K02893+K02893+K02893+K02997+K02997+K02951+K02951+K02951+K02966+K02966+K02940+K02940+K02940+K02940+K02940+K02940+K02940+K02942+K02942+K02942+K02935+K02935+K02978+K02927+K02927+K02915+K02915+K02915+K02915+K02915+K02866+K02866+K02866+K02866+K02866+K02866+K02866+K02866+K02866+K02866+K02866+K02866+K02866+K02866+K02978+K02978+K02978+K02978+K02874+K02874+K02874+K02874+K02874+K02874+K02874+K02874+K02947+K02947+K02947+K02947+K02947+K02947+K02947+K02947+K02947+K02947+K02947+K02877+K02877+K02877+K02877+K02877+K02877+K02960+K02960+K02960+K02960+K02960+K02960+K02960+K02930+K02930+K02930+K02930+K02930+K02930+K02930+K02964+K02964+K02964+K02954+K02954+K02963+K02954+K02954+K02954+K02923+K02923+K02923+K02923+K02910+K02910+K02910+K02910+K02910+K02910+K02935+K02935+K02935+K02971+K02971+K02971+K02971+K02879+K02879+K02951+K02951+K02951+K02942+K02942+K02942+K02942+K02942+K02942+K02942+K02868+K02868+K02868+K02902+K02902+K02952+K02952+K02921+K02921+K02906+K02906+K02906+K02906+K02880+K02880+K02880+K02880+K02948+K02948+K02912+K02912+K02996+K02996+K02996+K02875+K02875+K02875+

---

---

K02957+K02957+K02957+K02957+K02957+K02905+K02905+K02905+K02905+K02976+K02976+K02976+K02976+K02976+K02867+K02867+K02946+K02946+K02963+K02904+K02961+K02961+K02961+K02961+K02961+K02934+K02883+K02883+K02883+K02884+K02884+K02933+K02941+K02971+K02971+K02971+K02971+K02870+K02870+K02870+K02870+K02870+K02870+K02870+K02870+K02870+K02961+K02961+K02961+K02961+K02937+K02937+K02937+K02937+K02937+K02937+K02876+K02952+K02952+K02952+K02917+K02917+K02917+K02917+K02917+K02917+K02983+K02983+K02983+K02990+K02990+K02942+K02942+K02942+K02942+K02942+K02942+K02942+K02922+K02922+K02896+K02896+K02907+K02907+K02974+K02974+K02974+K02974+K02939+K02990+K02990+K02927+K02927+K02927+K02927+K02927+K02882+K02981+K02981+K02981+K02880+K02880+K02880+K02933+K02933+K02933+K02933+K02933+K02933+K02924+K02924+K02937+K02969+K02969+K02969+K02911+K02911+K02911+K02911+K02887+K02887+K02887+K02887+K02918+K02918+K02918+K02883+K02883+K02916+K02930+K02982+K02982+K02982+K02903+K02903+K02997+K02997+K02997+K02997+K02865+K02865+K02865+K02865+K02865+K02865+K02865+K02954+K02920+K02920+K02896+K02910+K02910+K02910+K02867+K02964+K02964+K02964+K02964+K02881+K02881+K02918+K02918+K02918+K02906+K02906+K02924+K02924+K02924+K02924+K02992+K02992+K02920+K02920+K02983+K02989+K02989+K02989+K02865+K02865+K02881+K02881+K02881+K02881+K02881+K02913+K02913+K02913+K02915+K02915+K02915+K02915+K02883+K02888+K02965+K02965+K02965+K02909+K02872+K02864+K02864+K02922+K02922+K02922+K02922+K02922+K02988+K02988+K02900+K02991+K02991+K02873+K02873+K02995+K02937+K02937+K02937+K02926+K02926+K02945+K02945+K02996+K02997+K02997+K02894+K02992+K02950+K02992+K02877+K02966+K02966+K02868+K02981+K02867+K02889+K02987+K02987+K02987+K02981+K02889+K02987+K02987+K02987+K02889+K02889+K02889+K02889+K02896+K02896+K02896+K02896+K02896+K02896+K02896+K02981+K02889+K02889+K02867+K02871+K02982+K02894+K02894+K02894+K02925+K02925+K02925+K02925+K02925+K02998+K02998+K02998+K02998+K02998+K02998+K02998+K02998+K02998+K02998+K02998+K02998+K02998+K02998+K02895+K02895+K02895+K02971+K02971+K02971+K02971+K02971+K02914+K02914+K02914+K02914+K02914+K02914+K02914+K02914+K02966+K02966+K02966+K02984+K02865+K02906+K02906+K02906+K02906+K02934+K02934+K02934+K02934+K02934+K02934+K02934+K02945+K02945+K02945+K02945+K02879+K02941+K02941+K02941+K02941+K02941+K02941+K02941+K02941+K02941+K02889+K02889+K02889+K02889+K02889+K02889+K02988+K02988+K02988+K02988+K02988+K02879+K02879+K02879+K02879+K02879+K02899+K02899+K02899+K02899+K02899+K02899+K02957+K02957+K02957+K02957+K02957+K02946+K02945+K02987+K02992+K02930+K02987+K02979+K02930+K02950+K02979+K02945+K02993+K02971+K02987+K02993+K02950+K02938+K02938+K02982+K02938+K02911+K02956+K02878+K02963+K02963+K02896+K02896+K02896+K02896+K02896+K02896+K02950+K02963+K02954+K02963+

---



---

K03231+K14307+K14307+K12881+K12879+K13171+K13025+K13025+K03260+K03260+K03253+K03253+K03253+K03253+K03253+  
K03253+K03253+K14309+K14309+K14309+K14309+K14309+K14309+K14309+K14309+K14309+K03252+K03252+K03252+K03252+K03252+  
K03252+K03252+K03252+K18213+K18213+K18213+K18213+K18213+K14320+K14320+K14320+K14320+K14320+K14320+K14320+  
K14297+K14297+K14297+K14297+K14297+K03260+K03260+K03260+K03260+K03260+K03260+K03260+K03260+K03260+K03260+  
K03260+K03260+K03260+K03260+K03260+K03260+K03260+K03260+K03260+K03260+K03260+K03260+K03260+K03260+  
K03260+K03260+K03260+K12878+K12878+K12878+K12878+K12878+K12878+K12878+K12878+K12878+K12878+K12878+K12878+K09291+  
K13126+K14312+K14312+K14312+K12812+K12812+K12812+K07562+K07562+K07562+K07562+K07562+K07562+K07562+K07562+  
K07562+K03237+K03237+K03237+K03237+K03237+K03237+K03237+K05019+K05019+K05019+K13174+K13174+K13174+K13174+  
K13174+K13174+K13174+K13174+K13174+K13174+K18213+K18213+K18213+K14293+K14293+K14293+K14293+K14293+K14293+  
K14318+K14318+K14318+K14318+K14318+K12160+K12160+K14327+K14327+K14327+K14327+K14327+K14327+K14327+K14327+  
K14327+K14327+K14327+K14327+K14327+K14327+K14293+K14293+K14293+K14293+K14293+K14293+K14293+K14293+K14293+  
K14293+K14293+K14293+K14293+K14293+K00784+K00784+K01164+K01164+K01164+K01164+K01164+K01164+K01164+K01164+  
K01164+K01164+K01164+K01164+K12881+K12881+K12881+K12881+K12881+K14303+K14303+K14303+K14303+K14303+K14303+  
K14303+K14303+K12875+K12875+K12875+K12875+K12875+K12875+K12875+K12875+K12875+K12875+K12875+K12875+K12875+  
K12875+K12875+K12875+K14310+K14310+K14310+K14310+K14310+K03257+K03257+K14297+K14297+K14297+K14297+K14297+  
K03259+K03259+K03259+K03260+K03260+K03260+K03260+K03260+K03260+K03260+K03260+K03260+K03260+K03260+K03260+  
K03260+K03260+K03260+K03260+K03260+K03260+K03260+K03260+K03260+K03260+K03260+K03260+K03260+K03260+K03260+  
K03260+K03260+K13126+K13126+K13126+K14313+K14313+K14313+K14313+K14313+K14300+K14300+K13126+K12881+K12881+  
K12881+K12881+K12881+K12881+K13137+K13137+K13137+K13137+K03680+K03680+K03680+K03680+K02516+K02516+K02516+  
K02516+K02516+K03240+K03240+K03240+K03240+K03240+K03240+K12881+K12881+K14314+K14314+K14314+K14314+K14314+  
K14314+K14314+K13126+K13126+K13126+K13126+K13126+K03248+K03248+K03248+K03680+K03680+K03680+K03680+K03680+  
K03680+K03680+K13126+K13126+K14308+K14308+K14308+K14308+K14308+K14308+K03251+K03251+K03251+K03251+K03251+  
K03251+K03251+K03539+K12881+K12881+K12881+K12881+K12881+K12881+K03262+K03262+K03262+K03262+K14319+K14319+  
K14319+K14319+K13171+K03231+K14291+K03231+K03231+K03231+K03231+K03231+K03257+K03257+K13126+K03231+K13126+  
K03262+K13126+K13126+K05749+K03262+K03231+K03231+K13126+K03231+K13126+K03231+K03231+K03262+K03231+K13126+  
K14292+K14291+K13126+K13126+K14299+K03231+K14291+K05749+K05749+K05749+K05749+K05749+K05749+K05749+K05749+

---



















|                      |         |     |                                                                                                                                                                                                                                                                                                                                                                                                                                                                                                                                                                                                                                                                                                                                                                                                                                                                                                                                                                                                                                                                                                                                                                                                                                                                                                                                                                                                                                                                                                                                                                                                                                                                                                                                                                                                                                                                                             |
|----------------------|---------|-----|---------------------------------------------------------------------------------------------------------------------------------------------------------------------------------------------------------------------------------------------------------------------------------------------------------------------------------------------------------------------------------------------------------------------------------------------------------------------------------------------------------------------------------------------------------------------------------------------------------------------------------------------------------------------------------------------------------------------------------------------------------------------------------------------------------------------------------------------------------------------------------------------------------------------------------------------------------------------------------------------------------------------------------------------------------------------------------------------------------------------------------------------------------------------------------------------------------------------------------------------------------------------------------------------------------------------------------------------------------------------------------------------------------------------------------------------------------------------------------------------------------------------------------------------------------------------------------------------------------------------------------------------------------------------------------------------------------------------------------------------------------------------------------------------------------------------------------------------------------------------------------------------|
| Protein export       | ko03060 | 212 | <p>K03036+K03032+K02735+K03062+K03062+K03062+K03062+K03028+K03028+K03028+K03028+K03028+K03028+K03028+K03065+K03065+K03028+K03028+K03028+K03028+K03065+K03028+K03028+K02731+K02737+K03065+K03065+K02737+K03028+K03033+K03033+K03033+K03033+K03033+K03033+K03061+K03061+K03061+K03061+K03061+K03061+K03035+K03035+K03035+K03035</p> <p>K03217+K03217+K03217+K09648+K07342+K07342+K07342+K07342+K07342+K03100+K09647+K09647+K09647+K09647+K09647+K03116+K03116+K07342+K07342+K07342+K13280+K13280+K13280+K13280+K03104+K03104+K03104+K03104+K12946+K12946+K12946+K03110+K03110+K03110+K03110+K03100+K03100+K12947+K12947+K12947+K09647+K12948+K12948+K12948+K12948+K12272+K12272+K12272+K09540+K03105+K03105+K09481+K09481+K09481+K09481+K09481+K03106+K12947+K03118+K03118+K03118+K03109+K03109+K03109+K03109+K03109+K03109+K03109+K03109+K03109+K03109+K03109+K03109+K03109+K09490+K09490+K09490+K03108+K03070+K03070+K03070+K03070+K03070+K03070+K03070+K03070+K03070+K03070+K03070+K03070+K03070+K10956+K10956+K10956+K10956+K10956+K10956+K10956+K10956+K10956+K10956+K03070+K03070+K03070+K03070+K03070+K03070+K03070+K03070+K03070+K03070+K03070+K03217+K03217+K03217+K03217+K03217+K03217+K03217+K03217+K03217+K03106+K03106+K03106+K03106+K03106+K03106+K03106+K03106+K03217+K03217+K03217+K03217+K12275+K12275+K12275+K12275+K12275+K09490+K13431+K13431+K13431+K13431+K13431+K13431+K13431+K13431+K09540+K09540+K09540+K09540+K09540+K09540+K09540+K09540+K09540+K09540+K12946+K12946+K12946+K12946+K03106+K03106+K03106+K03106+K03109+K03108+K03217+K03217+K03217+K03217+K09490+K09490+K09490+K09490+K09490+K09490+K03217+K09490+K09490+K09490+K09490+K03109+K09490+K09490+K09490+K09490+K03108+K09490+K09490+K09490+K09490+K03108+K03108+K03108+K03108+K03108+K03108+K03217+K09490+K10956+K03107+K03107+K03107+K03107+K03107+K03107+K12947+K12947+K12947+K12947+K12947+K10956</p> |
| Base excision repair | ko03410 | 111 | <p>K10802+K10802+K10802+K10802+K10802+K10802+K10802+K10802+K10802+K10802+K01246+K01246+K01246+K01246+K03652+K03652+K04799+K04799+K04799+K04799+K01246+K10802+K10802+K10802+K10802+K10802+K10802+K10802+K10802+K10802+K10802+K10802+K10802+K02328+K01247+K01247+K01247+K01247+K03505+K03505+K03505+K10772+K10772+K03506+K01246+K04802+K04802+K02325+K02325+K02326+K02327+K02327+K02327+K02327+K02327+K10798+K10798+K10798+K10798+K10798+K10798+K10747+K10747+K10747+K10747+K10747+K10747+K02335+K02335+K02335+K01142+K01142+K01142+K03504+K03504+K03504+K03504+K10747+K10747+K10747+K10747+K10747+K01246+K01246+K01246+K01246+K01246+K01246+K10801+K02327+K10801+K01246+K10801+K10801+K10801+K01246+K01246+K01246+K10563+K10563+K10563+K10563+K10563+K10563+K02325+K02325+K02325+K02325+K02325+K02325+K04802+K04802+K03512+K03512</p>                                                                                                                                                                                                                                                                                                                                                                                                                                                                                                                                                                                                                                                                                                                                                                                                                                                                                                                                                                                                                                                        |





|                                       |         |     |                                                                                                                                                                                                                                                                                                                                                                                                                                                                                                                                                                                                                                                                                                                                                                                                                                                                                                                                                                                                                                                                                                                                                                                                                                                                                                                                                                                                                                                                                                                                                                                                                                               |
|---------------------------------------|---------|-----|-----------------------------------------------------------------------------------------------------------------------------------------------------------------------------------------------------------------------------------------------------------------------------------------------------------------------------------------------------------------------------------------------------------------------------------------------------------------------------------------------------------------------------------------------------------------------------------------------------------------------------------------------------------------------------------------------------------------------------------------------------------------------------------------------------------------------------------------------------------------------------------------------------------------------------------------------------------------------------------------------------------------------------------------------------------------------------------------------------------------------------------------------------------------------------------------------------------------------------------------------------------------------------------------------------------------------------------------------------------------------------------------------------------------------------------------------------------------------------------------------------------------------------------------------------------------------------------------------------------------------------------------------|
|                                       |         |     | K03505+K10882+K10882+K03553+K03553+K03553+K03553+K04482+K04482+K03553+K03553+K03553+K07466+K07466+K07466+K10875+K10875+K10875+K10875+K02327+K02327+K02327+K02327+K07466+K07466+K07466+K07466+K07466+K07466+K07466+K07466+K07466+K03165+K03165+K03165+K03165+K03165+K03165+K03165+K03165+K10865+K10865+K10865+K10865+K10865+K07466+K07466+K07466+K10875+K10875+K10875+K10875+K10875+K10875+K10875+K03165+K03165+K03165+K03165+K03165+K03165+K03165+K10866+K10866+K10866+K03111+K03111+K03111+K03111+K03111+K10882+K10882+K10882+K10882+K10882+K10882+K10869+K02335+K02335+K02335+K10901+K10901+K10901+K10901+K10879+K10879+K10879+K10879+K10879+K10879+K03504+K03504+K03504+K07466+K07466+K07466+K03553+K03553+K02327+K07466+K07466+K07466+K07466+K10867+K10867+K10867+K10867+K03655+K03655+K07466+K03553+K03553+K03553+K03553+K03553                                                                                                                                                                                                                                                                                                                                                                                                                                                                                                                                                                                                                                                                                                                                                                                                          |
| Non-homologous end-joining            | ko03450 | 34  | K04799+K04799+K04799+K04799+K10865+K10865+K10865+K10865+K10865+K10866+K10866+K10866+K10777+K10777+K10777+K10777+K10777+K10777+K10777+K10777+K10777+K10777+K10885+K10885+K10884+K10884+K10884+K10884+K03512+K03512                                                                                                                                                                                                                                                                                                                                                                                                                                                                                                                                                                                                                                                                                                                                                                                                                                                                                                                                                                                                                                                                                                                                                                                                                                                                                                                                                                                                                             |
| Phosphatidylinositol signaling system | ko04070 | 222 | K00913+K00913+K00913+K00913+K00913+K00915+K00915+K00915+K00913+K00913+K00921+K00921+K00921+K00921+K00921+K02183+K02183+K02183+K02183+K02183+K02183+K02183+K02183+K02183+K02183+K02183+K02183+K02183+K00921+K00921+K00921+K00921+K00921+K00921+K10572+K10572+K10572+K10572+K10572+K00921+K00921+K00921+K00921+K00921+K00921+K00921+K00921+K00921+K00921+K15422+K15422+K02183+K02183+K02183+K01092+K01092+K00999+K00999+K00999+K00999+K00999+K02183+K00913+K01110+K01110+K01110+K01110+K01110+K01110+K01110+K01110+K01110+K01110+K01110+K01110+K01110+K00901+K01110+K01110+K01110+K00901+K00901+K00889+K00889+K00889+K00889+K00889+K00889+K00888+K00888+K01106+K01106+K00889+K00889+K00889+K00889+K02183+K02183+K02183+K02183+K02183+K02183+K02183+K02183+K00914+K00914+K00914+K00914+K00901+K00901+K00901+K00901+K00901+K00889+K00889+K00889+K00889+K00889+K00889+K00889+K00889+K00889+K00889+K00889+K01110+K01110+K05857+K05857+K05857+K05857+K05857+K05857+K05857+K05857+K00888+K00888+K00888+K00888+K00888+K00888+K00981+K10572+K10572+K10572+K10572+K00915+K00915+K00915+K00901+K01092+K00981+K00981+K00901+K00901+K00901+K05857+K10572+K10572+K10572+K10572+K00901+K00901+K10572+K10572+K00901+K00901+K10572+K00901+K00901+K00901+K10572+K10572+K00901+K10572+K10572+K10572+K10572+K01092+K00901+K00901+K00901+K00901+K00901+K05857+K00901+K00901+K00901+K00901+K00901+K00981+K05857+K05857+K05857+K05857+K01110+K05857+K00901+K00981+K00901+K15422+K01110+K05857+K00901+K00901+K00981+K00901+K00901+K00901+K15422+K00901+K00901+K00901+K01110+K00901+K00901+K00901+K05857+K05857+K00901+K00901+K00901+K00913+K00913+K00981+K00981+K00981 |







---

K10609+K10609+K10609+K10609+K10609+K10609+K10609+K10609+K10609+K10609+K10609+K10590+K10590+K10590+K10590+K10144+K10144+K10144+K03350+K03350+K03350+K03350+K03350+K03350+K03350+K03350+K03350+K03350+K03350+K03350+K10592+K10592+K10592+K03353+K03353+K03353+K03354+K03354+K03354+K03354+K03354+K10610+K10610+K10610+K10610+K10610+K10610+K10610+K10610+K10610+K10610+K10610+K10610+K04649+K04649+K04649+K04649+K04649+K04649+K04649+K04649+K06689+K06689+K06689+K06689+K06689+K06689+K06689+K06689+K06689+K10591+K10591+K10591+K10591+K10591+K10591+K10591+K10591+K10591+K10685+K10685+K03349+K03349+K03349+K03349+K03349+K03349+K09561+K09561+K09561+K09561+K09561+K09561+K04506+K10570+K10570+K10570+K10570+K06689+K06689+K10581+K10581+K10581+K10581+K10581+K10581+K10581+K10581+K10581+K10581+K10581+K10581+K10581+K10581+K10576+K03351+K03351+K03351+K03869+K03869+K03869+K03869+K03869+K03869+K03869+K03869+K03869+K03869+K03869+K03869+K03869+K03869+K03868+K03868+K03868+K03868+K03868+K03868+K03868+K03868+K03353+K03353+K03353+K03094+K03094+K03094+K03094+K10599+K10599+K10599+K10599+K10588+K10588+K10588+K10588+K10588+K10588+K10588+K10588+K10588+K03347+K03347+K03178+K03178+K10573+K03347+K03178+K03178+K10143+K10573+K03875+K10579+K03347+K10580+K10573+K03178+K03347+K03347+K03347+K03178+K03178+K03178+K03178+K03178+K03178+K03347+K03347+K03352+K03347+K03347+K03347+K03347+K03347+K03178+K03347+K10589+K10589+K10589+K10589+K10589+K10589+K10589+K10589+K10589+K10589+K10589+K10589+K10589+K03347+K03178+K03178+K10573+K03347+K03347+K03347+K03347+K03178+K03178+K03178+K03178+K03347+K03348+K10573+K03178+K10573+K03178+K03347+K03347+K03347+K03347+K03178+K10688+K03178+K03178+K03178+K03347+K10577+K03348+K10143+K10143+K03094+K03178+K03347+K03352+K03347+K03347+K03347+K03347+K03352+K03347+K03347+K03347+K03347+K03347+K03875+K10589+K03352+K03875+K03347+K03347+K03347+K03347+K03347+K03347+K03352+K03347+K10143+K03352+K03347+K10143+K03347+K03347+K03347+K03347+K03347+K03347+K03347+K03347+K03352+K03347+K03352+K03347+K03178+K03352+K03347+K03347+K03178+K10597+K10597+K10597+K10597+K03094+K03094+K03094+K03094+K03364+K04706+K04706+K04706+K04706+K04706+K04706+K04706+K04706+K04706+K04706+K04706+K04706+K04706+K04706+K04706+K04706+K10140+K10140+K10140+K10140

Sulfur relay ko04122 41  
system

K04487+K04487+K04487+K14168+K14168+K14168+K14168+K14168+K14168+K14168+K12161+K12161+K12161+K03635+K03635+K03635+K03635+K03635+K03635+K11996+K11996+K11996+K11996+K11996+K11996+K00566+K00566+K00566+K00566+K00566+K00566+K00566+K00566+K01011+K01011+K01011+K01011+K01011+K01011+K01011+K01011+K01011+K14169

SNARE ko04130 105  
interactions in  
vesicular transport

K08515+K08516+K08516+K08516+K08503+K08503+K08503+K08503+K08490+K08490+K08490+K08490+K08506+K08506+K08506+K08506+K08506+K08496+K08496+K08496+K08496+K08496+K08495+K08495+K08495+K08495+K08495+K08488+K08488+K08488+K08497+K08497+K08497+K08490+K08486+K08486+K08486+K08486+K08515+K08515+K08486+K08486+K08515+K08515+K08515+K08495+K08495+K08495+



---

K13993+K13993+K13993+K13993+K13993+K13993+K13993+K13993+K13993+K11863+K03094+K03094+K09562+K09562+K09562+K12666+K12666+K12666+K12666+K12666+K13993+K13993+K13993+K13993+K13993+K13993+K03094+K03094+K03094+K03094+K03094+K03094+K03094+K03094+K13993+K13993+K13993+K13993+K13993+K13993+K06689+K06689+K13525+K14016+K14016+K14016+K09580+K09580+K09580+K09580+K09580+K09580+K09580+K04079+K04079+K04079+K04079+K09503+K09503+K09503+K10839+K10839+K10839+K10839+K10839+K07342+K07342+K07342+K13993+K13993+K13993+K13993+K03283+K14009+K14009+K14009+K13250+K13250+K09518+K09518+K09518+K09518+K09518+K09518+K09518+K09518+K07953+K07953+K14006+K14006+K10666+K10666+K10575+K10575+K10575+K05546+K08057+K08057+K08057+K08057+K08057+K08057+K08057+K13249+K13249+K13249+K13249+K14016+K14016+K13993+K13993+K13993+K13989+K13989+K07953+K07953+K07953+K07953+K07953+K07953+K07953+K07953+K07953+K06689+K06689+K06689+K06689+K06689+K06689+K06689+K06689+K06689+K06689+K06689+K06689+K03347+K10666+K10666+K09486+K04554+K04554+K04554+K04554+K04554+K04554+K04554+K04554+K04554+K13993+K13993+K13993+K13993+K13993+K13993+K13993+K13993+K13250+K13250+K13250+K09540+K03347+K09481+K09481+K09481+K09481+K09481+K13993+K10839+K14009+K14009+K14009+K14009+K14009+K14009+K14009+K14009+K14009+K09518+K09518+K09518+K09518+K09518+K14003+K14003+K03868+K03868+K13989+K13989+K13989+K13989+K09517+K09517+K09517+K08054+K14003+K14003+K14003+K14003+K08288+K03283+K13993+K13993+K13993+K13993+K13993+K08288+K12668+K10666+K10666+K03094+K03094+K03094+K09487+K03094+K03094+K09490+K09490+K09490+K04079+K04079+K04079+K04079+K09561+K09561+K03347+K03347+K03347+K03347+K14005+K14005+K09503+K14009+K12669+K03283+K03283+K03283+K03283+K03283+K08288+K12669+K03347+K03347+K13993+K08653+K08653+K08653+K08653+K08653+K08653+K08653+K03347+K14007+K14007+K14007+K14007+K14007+K14007+K14007+K14007+K14007+K14007+K14007+K14007+K14007+K14007+K14007+K14007+K14007+K16196+K16196+K16196+K12666+K12666+K12666+K12666+K11718+K11718+K11718+K11718+K10601+K10601+K10601+K10601+K10601+K10601+K10601+K10601+K10601+K10601+K10601+K10601+K10601+K10601+K10601+K10601+K10601+K10601+K10601+K14009+K14009+K14009+K14009+K14009+K14009+K14001+K14001+K14001+K14001+K14001+K10956+K10956+K10956+K10956+K10956+K10956+K10956+K10956+K09580+K10666+K10666+K10666+K10666+K10666+K07151+K07151+K07151+K07151+K07151+K07151+K07151+K07151+K07151+K03237+K03237+K03237+K03237+K03237+K03237+K03237+K09584+K09584+K09584+K09584+K09584+K09584+K10084+K10084+K10084+K10084+K10084+K10084+K10084+K10666+K10666+K10666+K10666+K10666+K10666+K06689+K06689+K06689+K06689+K06689+K06689+K06689+K06689+K06689+K06689+K06689+K06689+K06689+K06689+K10950+K10950+K10950+K10950+K10950+K10950+K10950+K10950+K10085+K10085+K10085+K10085+K10085+K10085+K09518+

---

---

K09518+K09518+K09518+K09518+K05546+K10666+K10666+K10666+K12275+K12275+K12275+K12275+K12275+K13525+K12667+K12667+K12667+K12667+K12667+K12667+K12667+K12667+K12667+K12667+K12667+K12667+K12667+K12667+K12667+K12667+K12667+K12667+K14026+K14026+K14026+K14026+K14026+K14026+K14026+K14026+K14026+K14026+K09490+K01230+K01230+K01230+K01230+K01230+K01230+K08852+K08852+K08852+K08852+K08852+K08852+K08852+K08852+K08852+K09561+K09561+K09561+K09561+K09561+K09561+K13525+K13993+K09487+K09487+K09487+K09487+K09487+K09487+K09487+K09487+K09487+K09487+K09487+K09487+K09487+K09487+K09487+K10950+K10950+K10950+K10950+K10950+K10950+K10950+K10950+K10950+K10950+K06689+K06689+K07151+K07151+K07151+K07151+K07151+K07151+K07151+K08852+K08852+K10636+K10636+K10636+K10636+K10636+K10636+K10636+K10636+K10636+K10636+K09580+K09580+K09580+K09580+K09580+K09580+K09580+K09580+K09580+K09580+K09580+K09580+K09580+K09580+K10666+K10666+K10666+K10666+K09580+K07765+K07765+K01230+K01230+K01230+K01230+K01230+K14016+K14016+K14016+K14016+K10666+K10666+K10666+K10666+K10666+K03868+K03868+K03868+K03868+K03868+K03868+K09580+K09580+K09580+K09580+K09580+K13989+K13989+K13989+K13989+K13989+K13989+K13989+K09540+K09540+K09540+K09540+K09540+K09540+K09540+K09540+K09540+K09540+K09540+K09540+K09540+K09540+K09540+K09540+K03283+K03283+K03283+K03283+K03094+K03094+K03094+K03094+K14011+K14011+K14011+K04523+K04523+K04523+K04523+K04523+K04523+K04523+K04523+K04523+K04523+K08057+K08057+K08057+K08057+K08057+K08057+K08057+K08057+K08057+K08057+K08057+K08057+K08057+K08057+K08057+K08057+K08057+K03347+K04079+K01456+K03347+K04079+K09487+K13525+K03347+K13525+K04079+K10661+K09487+K14005+K14005+K05546+K12666+K03283+K08054+K04079+K14012+K03283+K08288+K10661+K14006+K03283+K14003+K04079+K08288+K04079+K08054+K03283+K03283+K08288+K03283+K14018+K04079+K04079+K09487+K04079+K01456+K13525+K09580+K14012+K14003+K09580+K12666+K09580+K03347+K08054+K03283+K03283+K08288+K03283+K03283+K03283+K09487+K04079+K01456+K08288+K03283+K12666+K08288+K12666+K04079+K13993+K04079+K04079+K03283+K03283+K14005+K12666+K08054+K12666+K03283+K10661+K12666+K04079+K04079+K09580+K08288+K03283+K12666+K04079+K04079+K14012+K03347+K03283+K09490+K09490+K09580+K03283+K12666+K09490+K09580+K09580+K08054+K09487+K12666+K04079+K08288+K03283+K03283+K14003+K04079+K03283+K09490+K09490+K01456+K09487+K09487+K03283+K03347+K04079+K03347+K01456+K09580+K03283+K04079+K03283+K01228+K10661+K03283+K03347+K10661+K09487+K03347+K01456+K04079+K10661+K14007+K03347+K03283+K09487+K09490+K09490+K08288+K03283+K04079+K03283+K14006+K09490+K14005+K10661+K03347+K09486+K09490+K13525+K04079+K09487+K14005+K10661+K14005+K03347+K03347+K09487+K04079+K03347+K09487+K10661+K14005+K09580+K08288+K10661+K09487+K01456+K03347+K04079+K09487+K04079+K03283+K04079+K10661+K03283+K04079+K10661+K04079+K01456+K09487+K04079+K04079+K04079+K04079+K04079+K10661+K08054+K03347+K04079+K04079+K04079+K03283+K09487+

---





---

K12198+K12198+K12198+K12198+K12198+K07904+K07904+K07904+K07904+K07937+K12183+K12193+K12193+K12193+K12195+K12195+K12195+K07897+K07897+K07897+K07897+K07897+K12194+K12194+K12194+K12194+K18443+K18443+K12199+K12199+K01115+K07904+K07904+K07904+K12188+K12188+K07904+K07904+K07904+K07937+K07937+K07937+K07937+K07937+K07937+K07937+K07937+K04646+K04646+K07904+K07904+K07904+K07904+K07904+K03283+K07889+K12479+K12479+K07904+K07904+K12185+K07904+K07904+K07904+K07904+K12183+K12183+K12183+K12486+K12486+K12486+K07889+K04646+K04646+K04646+K04646+K04646+K04646+K11827+K12194+K12194+K12194+K12194+K12194+K12194+K12194+K12194+K12191+K12191+K12191+K12191+K07937+K07937+K07937+K07904+K01115+K07904+K07904+K07904+K07904+K07897+K07897+K03283+K01115+K01115+K12189+K12189+K12189+K12200+K12471+K07889+K07889+K01528+K11866+K11866+K11866+K11866+K11866+K11866+K12197+K12197+K12197+K12197+K12197+K12197+K12197+K03283+K03283+K03283+K03283+K03283+K12197+K07904+K12197+K12197+K12197+K07889+K07889+K12184+K12184+K01115+K04646+K04646+K18442+K18442+K18442+K18442+K18442+K07904+K07904+K07904+K07904+K07904+K07904+K07904+K01528+K01528+K01528+K01528+K01528+K01528+K01528+K01528+K01528+K01115+K01115+K01115+K01115+K01115+K01115+K00889+K00889+K00889+K00889+K00889+K01115+K01115+K01115+K01115+K01115+K01115+K01115+K18443+K18443+K18443+K18443+K18443+K18443+K12471+K12471+K12471+K12471+K12471+K12471+K12471+K12471+K12489+K12489+K12489+K12489+K12489+K12489+K12489+K12489+K12489+K12489+K10591+K10591+K10591+K10591+K10591+K10591+K10591+K12489+K12489+K12489+K12489+K12489+K12489+K12489+K12489+K12489+K12489+K12489+K01115+K01115+K11826+K11826+K11826+K11826+K11826+K07904+K01115+K01115+K01115+K01115+K01115+K01115+K01115+K01115+K01115+K01115+K01115+K01115+K01115+K01115+K01115+K01115+K01115+K01115+K01115+K01115+K01115+K01115+K01115+K01115+K12483+K12483+K12483+K01115+K01115+K01115+K01115+K01115+K01115+K01115+K01115+K01115+K01115+K00889+K00889+K00889+K00889+K00889+K00889+K00889+K00889+K00889+K00889+K00889+K01115+K01115+K01115+K01115+K01115+K01115+K01115+K01115+K11824+K11824+K11824+K11824+K11824+K11824+K11824+K11824+K11824+K11824+K01528+K01528+K12198+K12198+K12198+K07889+K07889+K07889+K07889+K07889+K07889+K12489+K03283+K03283+K03283+K03283+K01528+K07889+K07889+K07889+K07889+K07889+K07889+K12200+K03283+K07904+K03283+K03283+K12471+K03283+K03283+K04646+K12486+K03283+K07904+K01115+K12486+K03283+K03283+K12471+K03283+K03283+K03283+K01115+K03283+K12471+K12486+K01115+K03283+K03283+K12471+K03283+K03283+K12471+K12471+K03283+K12471+K04646+K03283+K03283+K03283+K03283+K03283+K12471+K12200+K03283+K03283+K03283+K04646+K03283+K03283+K03283+K12200+K01115+K01115+K18442+K03283+K03283+K12

---





---

K03781+K03781+K03426+K03426+K13237+K13237+K13237+K11517+K13356+K13356+K13356+K13356+K13356+K13356+K13356+K13356+K13356+K13356+K13356+K13346+K13346+K07513+K07513+K00232+K01640+K01640+K01640+K01640+K13337+K13337+K13337+K04565+K04565+K04565+K04565+K04565+K07513+K06664+K06664+K06664+K06664+K13338+K13338+K13338+K13338+K04564+K04564+K04564+K13347+K13347+K13347+K12261+K13339+K13339+K13339+K13339+K13339+K13347+K13347+K04565+K04565+K13345+K11517+K13348+K13348+K13341+K13341+K04565+K04565+K12663+K12663+K12663+K13348+K13348+K00232+K00232+K00232+K00232+K00232+K00232+K00232+K00232+K00232+K00232+K00232+K00232+K00232+K00232+K00232+K00232+K00232+K00232+K00232+K00232+K00232+K00232+K00232+K13343+K13343+K13343+K13343+K13343+K13343+K00106+K00106+K00106+K00106+K00106+K00106+K01897+K01897+K01897+K01897+K01897+K01897+K01897+K01897+K01897+K01897+K01897+K01897+K01897+K01897+K01897+K01897+K01897+K01897+K01897+K01897+K01897+K01897+K01897+K01897+K01897+K01897+K05677+K13342+K13342+K13342+K13342+K13342+K13342+K13342+K13342+K13342+K00869+K00869+K00869+K00869+K00869+K00869+K13356+K01897+K01897+K01897+K01897+K01897+K01897+K01897+K01897+K01897+K00232+K00232+K00232+K00232+K00232+K01897+K01897+K01897+K01897+K01897+K01897+K01897+K01897+K01897+K01897+K01897+K01897+K01897+K01897+K01897+K01897+K01897+K00232+K00232+K00232+K11517+K11517+K11517+K11517+K11517+K13336+K13336+K13336+K13336+K13336+K00830+K00830+K00830+K00830+K00830+K00830+K00830+K00830+K01897+K01897+K01897+K01897+K01897+K01897+K01897+K13354+K13354+K13354+K13354+K13356+K01897+K01897+K01897+K01897+K01897+K01897+K01897+K01897+K01897+K01897+K01897+K01897+K01897+K01897+K01897+K01897+K07513+K07513+K07513+K07513+K07513+K07513+K07513+K13344+K13344+K13344+K13344+K13344+K13344+K13344+K13344+K13346+K01897+K01897+K01897+K00232+K01897+K01897+K01897+K13346+K00031+K01897+K01897+K01897+K01897+K00031+K01897+K01897+K13346+K01897+K13356+K01897+K01897+K01897+K01897+K01897+K01897+K13346+K13346+K13346+K01897+K01897+K12261+K01897+K01897+K13346+K01897+K01897+K01897+K01897+K13346+K01897+K01897+K13346+K13346+K13346+K13346+K07513+K00031+K13356+K12261+K12261+K13356+K13356+K13356+K12261+K12261+K13356+K13356+K12261+K12261+K13356+K13356+K12261+K12261+K13356+K13356+K12261+K12261+K13356+K01897+K01897+K00031+K13346+K13346+K01640+K01640+K01640+K01640+K01640+K01640+K01640+K01578+K01578+K01578+K01578+K11517+K11517+K11517+K11517+K00031+K00031+K03781+K03781+K03781+K03781+K03781+K03781+K03781+K03781+K03781+K03781+K00306+K00306+K13436+K13436+K13436+K13436+K12795+K12795+K12795+K12795+K13458+K13458+K13458+K13458+K12795+K12795+K12795+K12795+K12795+K13448+K13448+K13448+K13448+K13448+K13448+K04371+K04371+K04371+K04371+K04371+K04368+K13436+K13436+K13436+K13436+

---

Plant-pathogen  
interaction ko04626 701

---

K13436+K13436+K13436+K13436+K13412+K13430+K13457+K13457+K12795+K12795+K12795+K12795+K13457+K13457+K13457+  
K13457+K13457+K13457+K13457+K13457+K13457+K04079+K04079+K04079+K04079+K02183+K02183+K02183+K02183+K02183+  
K02183+K02183+K02183+K02183+K02183+K02183+K02183+K02183+K13414+K13414+K13449+K13449+K13449+K13448+K13448+  
K13448+K04368+K04368+K04368+K13448+K13448+K13448+K13448+K13448+K13448+K13448+K13448+K18834+K13448+K13448+K13448+  
K13448+K13448+K13429+K13448+K13448+K13448+K13448+K13448+K13448+K13448+K13448+K13448+K13448+K13448+K04368+  
K13448+K13448+K13448+K13412+K13412+K13448+K02183+K02183+K02183+K13436+K13436+K13436+K13448+K13448+K13448+  
K13448+K13448+K13448+K13448+K13420+K13420+K13456+K13456+K13456+K13448+K13448+K13448+K13448+K13413+K13413+  
K05391+K05391+K05391+K05391+K05391+K05391+K05391+K05391+K05391+K13413+K13413+K13416+K02183+K09487+K04079+  
K04079+K04079+K04079+K13448+K13436+K13436+K13436+K13436+K13436+K13448+K13412+K13412+K13412+K13412+K13457+K13459+  
K00864+K00864+K00864+K00864+K00864+K13459+K13459+K13459+K13459+K13459+K13459+K13459+K13459+K13459+K13459+  
K13459+K13459+K13459+K13459+K13459+K13459+K13459+K13459+K13459+K13459+K13459+K13459+K13459+K13459+K13459+  
K05391+K05391+K05391+  
K05391+K05391+K05391+K05391+K05391+K05391+K05391+K05391+K05391+K05391+K05391+K05391+K05391+K05391+K05391+  
K05391+K05391+K05391+K05391+K05391+K13447+K13447+K13447+K18834+K18834+K18834+K18834+K18835+K18835+K18835+  
K18835+K18835+K18835+K18835+K18835+K18835+K18835+K18835+K18835+K13457+K13457+K13457+K13457+K13457+K13457+  
K13457+K13457+K13457+K13457+K13457+K13457+K13457+K13457+K13457+K13457+K13457+K13457+K13457+K13457+  
K13457+K13457+K13412+K13412+K05391+K13457+K13457+K13457+K13413+K13448+K13448+K13448+K13448+K13448+K13448+  
K13448+K02183+K02183+K02183+K02183+K02183+K02183+K02183+K02183+K02183+K13412+K13412+K13412+K13412+K13412+K13412+  
K13412+K13412+K09487+K09487+K09487+K09487+K09487+K09487+K09487+K09487+K09487+K09487+K09487+K09487+K09487+  
K09487+K09487+K13427+K13427+K13427+K13427+K13427+K13427+K13412+K13412+K13412+K13412+K13412+K13412+K13412+  
K13412+K13412+K13412+K13412+K13412+K13412+K13412+K13412+K13412+K13412+K13412+K13412+K13412+K13412+K13412+  
K13412+K13412+K13412+K13412+K13412+K13412+K13412+K13412+K13412+K13412+K13412+K13412+K13412+K13412+K13412+  
K05391+K13412+K13412+K13412+K13412+K13412+K13412+K13412+K13412+K13412+K13412+K13412+K13412+K13412+K13412+  
K13412+K13412+K13412+K13412+K13430+K13430+K13430+K13430+K13430+K13430+K13430+K13430+K13430+K13430+K13430+  
K05391+K05391+K05391+K05391+K05391+K05391+K05391+K13412+K13412+K05391+K05391+K05391+K05391+K05391+K05391+  
K05391+

---
