# Supplementary material for: Single-molecule long-read sequencing of the full-length transcriptome of Rhododendron lapponicum L
Source: PubMed Central journal article supplement (PMC7174332; doi:10.1038/s41598-020-63814-x), 2020-04-21
Supplement: 41598_2020_63814_MOESM6_ESM.pdf [file 41598_2020_63814_MOESM6_ESM.pdf]

# Single-molecule long-read sequencing of the full-length transcriptome of *Rhododendron lapponicum* L.

Xinping Jia, Ling Tang, Xueying Mei, Huazhou Liu, Hairong Luo, Yanming Deng, Jiale Su

Institute of Leisure Agriculture, Jiangsu Academy of Agricultural Sciences, Jiangsu Key Laboratory for Horticultural Crop Genetic Improvement, Nanjing 210014, China

Table S6 Summary of the genes in anthocyanin biosynthesis pathway

| Gene                                 | Number | Gene ID                                                                                                                                                                                                                                                                                                                                                                                                                                                                                                                                                                                                                                                                                                                                                                                                                                                                                                                                                                                                                                                                                                                                                                                                                                                                 |
|--------------------------------------|--------|-------------------------------------------------------------------------------------------------------------------------------------------------------------------------------------------------------------------------------------------------------------------------------------------------------------------------------------------------------------------------------------------------------------------------------------------------------------------------------------------------------------------------------------------------------------------------------------------------------------------------------------------------------------------------------------------------------------------------------------------------------------------------------------------------------------------------------------------------------------------------------------------------------------------------------------------------------------------------------------------------------------------------------------------------------------------------------------------------------------------------------------------------------------------------------------------------------------------------------------------------------------------------|
| Trans-cinnamate 4-monoxygenase (C4H) | 7      | F01_cb9736_c8/flp0/2072; F01_cb14089_c2/flp0/1860; F01_cb14089_c0/flp3/1777;<br>F01_cb9736_c14/flp1/1658; F01_cb9736_c11/flp0/1823; F01_cb9736_c7/flp1/2054;<br>F01_cb9736_c2/f2p3/1866                                                                                                                                                                                                                                                                                                                                                                                                                                                                                                                                                                                                                                                                                                                                                                                                                                                                                                                                                                                                                                                                                 |
| Chalcone isomerase (CHI)             | 12     | F01_cb2253_c0/fl1p2/991; F01_cb2253_c13/flp0/860; F01_cb2253_c6/flp0/2583;<br>F01_cb2253_c4/flp0/2680; F01_cb2253_c3/flp0/2434; F01_cb2253_c10/flp0/982;<br>F01_cb2253_c12/flp1/962; F01_cb2253_c2/flp0/2538; F01_cb2253_c9/flp1/1001;<br>F01_cb2253_c8/flp1/1139; F01_cb2253_c1/f2p0/3998; F01_cb16358_c0/f3p0/839                                                                                                                                                                                                                                                                                                                                                                                                                                                                                                                                                                                                                                                                                                                                                                                                                                                                                                                                                     |
| Chalcone synthase (CHS)              | 41     | F01_cb8564_c868/f2p9/1907; F01_cb18456_c6019/flp5/1613; F01_cb18456_c6042/flp0/1560;<br>F01_cb18456_c6049/flp1/1546; F01_cb18456_c6515/flp0/1621; F01_cb8564_c11714/f2p0/2782;<br>F01_cb18456_c6036/flp0/1694; F01_cb18456_c5973/flp3/1686; F01_cb18456_c6024/flp0/1617;<br>F01_cb18456_c6810/flp0/1586; F01_cb18456_c6500/flp0/1679; F01_cb8564_c123804/flp1/2490;<br>F01_cb18456_c6478/flp2/1469; F01_cb18456_c1168/f22p1/1548; F01_cb18456_c2304/flp0/1374;<br>F01_cb8564_c126194/flp0/2132; F01_cb18456_c6496/flp0/1810; F01_cb18456_c6007/flp1/1591;<br>F01_cb18456_c5940/flp2/1461; F01_cb18456_c5957/flp0/965; F01_cb18456_c6490/flp0/1591;<br>F01_cb18456_c5939/flp3/1634; F01_cb11599_c10/f5p32/1656; F01_cb18456_c6517/flp0/994;<br>F01_cb11599_c6/flp8/1041; F01_cb18456_c5937/flp0/1763; F01_cb18456_c7798/f2p2/1522;<br>F01_cb18456_c7272/flp0/1376; F01_cb8564_c124225/flp0/2875; F01_cb8564_c125928/flp0/1916;<br>F01_cb18456_c6492/flp0/1536; F01_cb18456_c6955/flp0/1531; F01_cb18456_c6048/flp0/1595;<br>F01_cb18456_c6952/flp1/1718; F01_cb18456_c6054/flp0/1241; F01_cb8564_c124293/flp0/2958;<br>F01_cb18456_c5942/flp0/1676; F01_cb11599_c11/flp34/1663; F01_cb18456_c6063/flp0/1474;<br>F01_cb18456_c5927/flp0/1603; F01_cb18456_c6812/flp0/1046 |
| Naringenin 3-dioxygenase (F3H)       | 9      | F01_cb13925_c0/f2p0/1339; F01_cb13925_c1/flp0/1431; F01_cb13925_c7/flp0/1449;<br>F01_cb7606_c17/f44p3/1535<br>F01_cb13925_c4/flp0/1356; F01_cb7606_c7/flp1/1457; F01_cb7606_c8/flp0/1499;                                                                                                                                                                                                                                                                                                                                                                                                                                                                                                                                                                                                                                                                                                                                                                                                                                                                                                                                                                                                                                                                               |

---

|                                       |   |                                                                                                                                                                                                                                                                        |
|---------------------------------------|---|------------------------------------------------------------------------------------------------------------------------------------------------------------------------------------------------------------------------------------------------------------------------|
| Flavonoid 3'-hydroxylase (F3'H)       | 8 | F01_cb7606_c1/f5p0/2550; F01_cb13925_c3/flp1/1452<br>F01_cb7452_c15/flp1/1706; F01_cb7452_c16/flp0/1726; F01_cb7452_c5/flp1/1888;<br>F01_cb7452_c14/flp0/1741; F01_cb7452_c3/f2p0/1744; F01_cb7452_c6/flp1/1917;<br>F01_cb7452_c17/flp0/1655; F01_cb7452_c20/flp0/1034 |
| Flavonoid 3', 5'-hydroxylase (F3'5'H) | 8 | F01_cb7576_c3/flp0/2594; F01_cb3444_c2/flp0/3087; F01_cb7576_c14/flp1/1754;<br>F01_cb7576_c7/f2p0/1921; F01_cb7576_c17/f34p2/1894; F01_cb7576_c4/flp0/2124;<br>F01_cb7576_c6/flp0/2034; F01_cb7576_c5/flp0/2032                                                        |
| Anthocyanidin synthase (ANS)          | 5 | F01_cb7563_c5/f2p1/2302; F01_cb7563_c31/flp0/655; F01_cb7563_c21/flp1/1490;<br>F01_cb7563_c6/flp2/2589; F01_cb7563_c32/flp0/597                                                                                                                                        |
| Dihydroflavonol 4-reductase (DFR)     | 6 | F01_cb10454_c0/f25p3/1319; F01_cb12846_c0/f3p0/1373; F01_cb12234_c0/f2p0/1427;<br>F01_cb12846_c2/flp0/1720; F01_cb3655_c0/f2p0/2991; F01_cb12846_c1/flp0/1352                                                                                                          |

---
