# Supplementary material for: Single-molecule long-read sequencing of the full-length transcriptome of Rhododendron lapponicum L
Source: PubMed Central journal article supplement (PMC7174332; doi:10.1038/s41598-020-63814-x), 2020-04-21
Supplement: 41598_2020_63814_MOESM8_ESM.pdf [file 41598_2020_63814_MOESM8_ESM.pdf]

# Single-molecule long-read sequencing of the full-length transcriptome of *Rhododendron lapponicum* L.

Xinping Jia, Ling Tang, Xueying Mei, Huazhou Liu, Hairong Luo, Yanming Deng, Jiale Su

Institute of Leisure Agriculture, Jiangsu Academy of Agricultural Sciences, Jiangsu Key Laboratory for Horticultural Crop Genetic Improvement, Nanjing 210014, China

Table S8 The characterizations of EST-SSR markers

| Primer ID | Gene ID                      | Forward Primer (5'- 3') | Reverse Primer (5'- 3') | Product Size (bp) | Repeat motif | SSR Length | Amplification result |
|-----------|------------------------------|-------------------------|-------------------------|-------------------|--------------|------------|----------------------|
| RL-1      | R01_cb8564_c84685/flp0/3092  | CCCATTCTGTGCTCCTTGT     | CACGTCTTCTTCGCCTTTCT    | 212               | (TC)7        | 14         | S                    |
| RL-2      | R01_cb7730_c11/flp0/2324     | AGCAAGCAAGGCATTCTGTT    | CAAACGTCTCCCATTGTGTG    | 123               | (CAG)5       | 15         | S                    |
| RL-3      | R01_cb14480_c7/flp0/1514     | CTTTGGGGAGTGCAATCAAT    | CCACCATCTCATCTCCACCT    | 249               | (T)13        | 13         | S                    |
| RL-4      | R01_cb8564_c3089/flp0/2326   | TAGCAGTCCAAAACCCATCC    | GTATTTTCATGTCCTGCGCCT   | 227               | (CT)16       | 32         | S                    |
| RL-5      | R01_cb2533_c20/flp0/3689     | TCCTCCTTCCCTCTACCACA    | AACGGGCAATTCGTATCTG     | 172               | (AG)12       | 24         | F                    |
| RL-6      | R01_cb7418_c22/flp0/2362     | GATAGTGGTTCAGGCTCCGA    | CCATGAGCAAGCAAAAACAAA   | 108               | (TTTTG)5     | 25         | S                    |
| RL-7      | R01_cb8564_c125704/flp0/3725 | ACTACGTGTGATTTTCGGGC    | CTTTGTCCCCTACGAAACCA    | 196               | (A)18        | 18         | S                    |
| RL-8      | R01_cb8564_c81078/flp0/3804  | CCTAGGGTTTATGTGGTGTG    | CTGAAGCAAACGGAAATGGT    | 230               | (TC)8        | 16         | S                    |
| RL-9      | R01_cb11851_c41/flp1/1532    | CATAAGGAGCCACCAAAGGA    | CAAAACAAGCAAAATTGCGA    | 249               | (TGA)5       | 15         | S                    |
| RL-10     | R01_cb7067_c8/flp0/2552      | GCACAAGACCAGCATCTCAA    | CGCCGAGAGAAAGAGAGAAA    | 159               | (CT)10       | 20         | S                    |
| RL-11     | R01_cb15596_c6/flp0/1526     | CCTGCCTACTGTCCCCTCTA    | GGTTCAATACGTCCACACCC    | 243               | (TTTTCT)7    | 42         | S                    |
| RL-12     | R01_cb5595_c24/flp0/2545     | ACCAAAACACTCTCATCGGG    | GCAGAACTTGAGGGTCTGGA    | 196               | (TCC)5       | 15         | S                    |
| RL-13     | R01_cb3103_c1/flp0/2830      | GCCTGGACGCTTGAGTTATC    | AATGTAATCCCGGATCATGC    | 280               | (A)13        | 13         | S                    |
| RL-14     | R01_cb5517_c0/flp0/3079      | GTCCCACATCCAGGACACTT    | TGCCGAGTTGAGTTCTGAAA    | 267               | (C)49        | 49         | S                    |
| RL-15     | R01_cb9002_c3/flp0/1775      | AACCGATCACTCCGTCCTC     | GAAGGTAATCGGTTGAGGCA    | 122               | (ACC)5       | 15         | F                    |
| RL-16     | R01_cb1196_c7/flp0/2899      | GATAGGCGGATGGGTATTCA    | GATTGCTGCCACCAAATTCT    | 258               | (G)12        | 12         | S                    |
| RL-17     | R01_cb8564_c23779/flp0/3567  | TTATGGTTCCTGTTCCCAA     | CAAGGGTCAGTTTGCTCTCC    | 206               | (AC)6        | 12         | S                    |
| RL-18     | R01_cb2095_c14/flp0/4037     | GTGGACTTCGGACAGGTGTT    | CGAAGCTTGCAAAGAAATC     | 242               | (TTTTCT)5    | 30         | S                    |
| RL-19     | R01_cb8564_c13026/flp0/4872  | TTGTCCACTCACGCATTAGC    | CAGTAGAGTTGCCGGAGGAG    | 247               | (CA)13       | 26         | S                    |
| RL-20     | R01_cb8564_c9501/f5p0/2413   | GTACATGTCCATGTCCGTGC    | ATGGTGCTCAAAAACCCAGAG   | 272               | (CCGCCC)6    | 36         | S                    |
| RL-21     | R01_cb10015_c288/flp0/705    | CTGGGTCCTTTCCTCATCAA    | ACCATGAAACCATGGCAACT    | 141               | (TC)10       | 20         | S                    |
| RL-22     | R01_cb12646_c21/flp0/5253    | TTGATTGGGAATGGGTGAAT    | CTGTGGGTGAAGGAGGAGAG    | 181               | (C)14        | 14         | S                    |
| RL-23     | R01_cb10249_c3/flp0/2012     | AACAAGGCATTGAAACTCGG    | TTTAGGAGCTTCCCTCCCTCC   | 206               | (TCCCAC)5    | 30         | F                    |
| RL-24     | R01_cb12608_c6/flp1/1493     | GACAATCCCTGTGGACCTGT    | CGAATTTGGATTGAATCGCT    | 218               | (T)24        | 24         | S                    |

|       |                              |                       |                       |     |         |    |   |
|-------|------------------------------|-----------------------|-----------------------|-----|---------|----|---|
| RL-25 | R01_cb8564_c146119/f9p4/2560 | GGTCCGAATTTCTGATTGGA  | CTTGCGAGATGTGGACGTAA  | 263 | (GA)30  | 60 | F |
| RL-26 | R01_cb6640_c1/f1p0/2800      | GATGGACAATCGACAATCCC  | TCTCTCCAAACCCTCCATTG  | 267 | (TCG)5  | 15 | S |
| RL-27 | R01_cb12691_c3/f3p0/823      | AGCTCAAAGGTTTCCCCAGT  | GTCGCCAACCTCTTCTTGTC  | 260 | (TCC)6  | 18 | S |
| RL-28 | R01_cb17042_c0/f1p1/1015     | ATTCCTCCCTCTGACGGTCT  | CGGTGATTGAGAAGCAGACA  | 131 | (GATA)5 | 20 | S |
| RL-29 | R01_cb12916_c4/f2p4/756      | TCGGAGCTCGAAACCTACTC  | GAAATGGCGGTAGAGGAACA  | 240 | (AAC)5  | 15 | S |
| RL-30 | R01_cb1969_c1/f1p0/4106      | GAGGGATGGGAAACTGGACT  | TCCTAACATCGAATGGGCTC  | 265 | (TA)6   | 12 | S |
| RL-31 | R01_cb5494_c3/f1p0/2060      | GTCGACAGGGAGGAACTGAA  | TGAGGCCCCACAGATTTAAG  | 266 | (CCG)7  | 21 | S |
| RL-32 | R01_cb8564_c37057/f1p2/3976  | TATGTCAGGAAATCTGCCCC  | GAAGGGATTCACGGACAAAA  | 228 | (A)29   | 29 | S |
| RL-33 | R01_cb5290_c33/f1p0/3137     | GACAACGCTCCATTCTCCAT  | AAAGTATGCATGGAGCCGAC  | 270 | (CT)14  | 28 | F |
| RL-34 | R01_cb6802_c83/f1p0/2222     | GCAGAGCAACCATATCGTCA  | AACTGCCATTGTACCTTCCG  | 257 | (GAA)7  | 21 | S |
| RL-35 | R01_cb11118_c1/f1p0/2955     | GATTCCCATGGATGATGGAC  | CTGCTATTGTGTTTTCCGCA  | 181 | (AT)10  | 20 | S |
| RL-36 | R01_cb2930_c10/f1p2/2925     | ATAGGTGGAAGAACCAGGCA  | CTACCAAACTACGCCGGT    | 234 | (TCA)5  | 15 | S |
| RL-37 | R01_cb538_c3/f1p0/4762       | TCACCACCACCTTTCACAAA  | CCGTAAAAATGATGGTCGCT  | 224 | (G)36   | 36 | S |
| RL-38 | R01_cb5119_c0/f1p0/3133      | CGGACTCTCCTATCATAACC  | TGTGAGAACAAATCAGCTCCG | 260 | (CT)12  | 24 | S |
| RL-39 | R01_cb629_c5/f1p1/4671       | GCCTCCCCTGCAAGTAAAG   | TGGCAACACCAGCATATTGT  | 224 | (CCG)6  | 18 | S |
| RL-40 | R01_cb1283_c5/f1p0/3409      | CATGAGTGACGGGTTGATTG  | TTTGTGGTCTGTGGTGAAAA  | 174 | (CTG)7  | 21 | F |
| RL-41 | R01_cb6638_c6/f1p1/2651      | CTTCTGTTTTCGCGTAGGGAG | CGCATCGCAAAAAGTTATGAA | 172 | (T)16   | 16 | S |
| RL-42 | R01_cb6290_c1/f1p0/2815      | TTTTATTTTCGCACCCTCGTC | AAACCGCTTGCTTTTGTGTT  | 142 | (GA)13  | 26 | S |
| RL-43 | R01_cb3471_c0/f1p0/3611      | TGCTCATCTTGTGTCCTGCT  | GTTGGGGTGTGTCTGGTTT   | 200 | (AGT)5  | 15 | S |
| RL-44 | R01_cb6239_c11/f1p0/2522     | TTACCCAGTGGCACAATTCA  | GCGGGTAAAATGAGCAGAG   | 255 | (CTG)6  | 18 | S |
| RL-45 | R01_cb13274_c4/f1p1/936      | ATAACCACAACGAACCCCAA  | ACTGCTAATCCAGTCCACCG  | 113 | (TC)22  | 44 | S |
| RL-46 | R01_cb6692_c15/f1p0/2891     | CTACCGCAATTCACAGCAGA  | TTCGGAGAGAGCGAGAGAAG  | 133 | (CCTC)6 | 24 | S |
| RL-47 | R01_cb427_c22/f1p0/2136      | GCAACGGAGGAGAACAAGAG  | AAACAGCCTCCTTGACGAGA  | 195 | (GAG)10 | 30 | S |
| RL-48 | R01_cb18521_c1/f1p0/1653     | CATCCCCCTTCTTCTAAGCC  | GGAGTCCATGGAAGAGGTGA  | 186 | (CT)6   | 12 | S |
| RL-49 | R01_cb8564_c41535/f1p0/3083  | GTGTCCTTATTCTCCGCCA   | CAAAGGATTCACGGGATCATA | 216 | (A)40   | 40 | F |
| RL-50 | R01_cb8564_c77584/f1p0/4530  | TGACTTTGGAAGCCATCTCC  | CTTGAAGGGGTCCCTGATCT  | 188 | (C)13   | 13 | S |

|       |                              |                       |                       |     |            |    |   |
|-------|------------------------------|-----------------------|-----------------------|-----|------------|----|---|
| RL-51 | R01_cb3984_c14/f6p0/3196     | GGTGTTACTTCGCCCCGATTA | TGGCGTGAATTCTACTGCTG  | 149 | (AGT)5     | 15 | S |
| RL-52 | R01_cb8564_c125253/f1p0/2315 | ACCTACTCATTCCACTGCGG  | CAAGTAGCGGAGCTGGTTTC  | 269 | (TCGA)5    | 20 | S |
| RL-53 | R01_cb10048_c1/f6p0/1604     | GGCTTATTAACGACACGGGA  | ATCATCGTGACCTTGACCGT  | 263 | (GGTCAC)11 | 66 | S |
| RL-54 | R01_cb7182_c11/f1p0/2681     | AACACTCTTGTCCTCCGTCAC | AGTGTCCCTCTTTCCTGGGT  | 272 | (AGA)13    | 39 | S |
| RL-55 | R01_cb7863_c17/f1p0/2552     | ACTCATCAGTTTTCCCCAA   | CTTTCGGATCTCGACCATGT  | 208 | (TC)11     | 22 | S |
| RL-56 | R01_cb8564_c84227/f1p0/4645  | CACCTGGAAGTTTTTGGGAA  | AGGAGCAACATCGAGCCTAA  | 174 | (GAAAAG)5  | 30 | S |
| RL-57 | R01_cb7494_c0/f2p0/2606      | CCATTGACCTCTCTCCTCCA  | GGGGTTTTCGAAATGGAGAT  | 158 | (CTC)5     | 15 | S |
| RL-58 | R01_cb10800_c1/f1p0/1522     | CGATTTTGCTCCTCCTCATC  | GGCACCTTCCATCTTCCATA  | 187 | (GA)10     | 20 | S |
| RL-59 | R01_cb9994_c53/f1p0/1698     | TAGCAAAGCTGGACATGCAC  | CCAACATTGTTACGAGCCAA  | 257 | (TTG)5     | 15 | S |
| RL-60 | R01_cb15452_c0/f2p0/1734     | TGGGTACTTCACTTCCGGTT  | AAAGGCACGGAGAGAACAAA  | 241 | (CTT)22    | 66 | S |
| RL-61 | R01_cb3318_c0/f1p0/3663      | CAGTGGGGGAAGATGAAGAA  | CAACCTCAATTTTCTCCGA   | 189 | (GAG)5     | 15 | S |
| RL-62 | R01_cb2407_c3/f1p0/2341      | TGCATATGATGCTTTCAGGG  | AGCCCAACAAACACAACACA  | 136 | (CT)18     | 36 | F |
| RL-63 | R01_cb3010_c17/f1p1/3095     | GTCGTCCTCTCTATCTGGCG  | CCCACCTGACTGTGAAGGAT  | 127 | (CAG)7     | 21 | S |
| RL-64 | R01_cb8564_c46715/f1p0/3637  | CGTTAGTCTTGCGTTTTCC   | ATTCCCAAGAAAGCTCCGAT  | 227 | (CT)38     | 76 | S |
| RL-65 | R01_cb12624_c2/f1p0/1580     | AAGATAGATGAGGCGGGGTT  | TGCACTCTTCTACCCTCCT   | 246 | (GAA)18    | 54 | S |
| RL-66 | R01_cb7969_c11/f1p0/1950     | CAACCACACTTGATTGCACC  | ACACCATCCCCACATAGGAA  | 184 | (TGC)5     | 15 | S |
| RL-67 | R01_cb3229_c12/f1p0/2616     | GAAGCACCGGTGAAACAAGT  | GGTCCATAATCTCCAAGGCA  | 274 | (GA)19     | 38 | S |
| RL-68 | R01_cb7249_c7/f1p0/2600      | GGGTTGAGTTCCTCTTTTC   | CCGAACCTGTGAATGAATCC  | 212 | (AT)11     | 22 | S |
| RL-69 | R01_cb3862_c58/f1p0/1466     | GCTCTTCTCTCTCCACCGA   | CTGCTGCTGCTGTTGTTGTT  | 171 | (GA)8      | 16 | S |
| RL-70 | R01_cb322_c45/f1p0/3654      | GCGGAGGAGTCATCATCATT  | AACCTGGTCTTCCGAAGGT   | 277 | (TAA)5     | 15 | F |
| RL-71 | R01_cb8785_c1/f3p0/2272      | TCTAGCCCTGCCAATACTGC  | GCACCTTGTAACCATGTTG   | 260 | (CAA)5     | 15 | S |
| RL-72 | R01_cb2571_c24/f1p0/3923     | AAAGGGCTGCAGTTCAGAGA  | TTGGTTCATTCTGCAGCAG   | 266 | (GCT)5     | 15 | S |
| RL-73 | R01_cb8564_c929/f3p7/2427    | GAAGTCATGTGGAGGAGGGA  | TCATGTAAAGTGGGAGCCCT  | 208 | (TTG)6     | 18 | S |
| RL-74 | R01_cb8564_c71665/f3p0/2489  | TGTTTTCTGTGTTGTGCCGT  | CACCACATACAAATTCGCCA  | 159 | (AGT)11    | 33 | S |
| RL-75 | R01_cb8564_c127920/f1p0/2676 | AAGACGAAGAAGCTGAACACG | CTGTCTCTCGAAACCTTGC   | 189 | (GA)13     | 26 | S |
| RL-76 | R01_cb9840_c0/f1p0/1950      | GATTGACTGTTGAGGGGGAA  | CCCAGTCAATTATCAAAGGTC | 266 | (TTTGTT)15 | 90 | F |

|        |                              |                         |                      |     |           |    |   |
|--------|------------------------------|-------------------------|----------------------|-----|-----------|----|---|
| RL-77  | R01_cb7337_c3/flp0/2569      | TGGTTGAGGCCTTGATAAC     | ATCGGTACGGTGAAGGTGAG | 271 | (CTCTCC)5 | 30 | S |
| RL-78  | R01_cb8564_c22336/flp0/2652  | CATCCACCCGTAACGACTCT    | TTCTGCATGCCATTCGTTTA | 225 | (TC)10    | 20 | S |
| RL-79  | R01_cb5421_c4/flp0/1919      | TACGCATAACGGAATCCTCC    | CTCAGGAGGATGAGACCCAG | 233 | (GAA)7    | 21 | S |
| RL-80  | R01_cb17467_c0/flp0/802      | CGTCGGATTAGACTTTTGGC    | TGAGGACACCACCGTAAACA | 263 | (T)16     | 16 | S |
| RL-81  | R01_cb1881_c0/f2p0/1523      | CGTCCCTCTTTTCACCCATA    | ACTACGTTGCTATGCACCC  | 205 | (AG)13    | 26 | F |
| RL-82  | R01_cb8564_c69187/f6p2/3623  | AGCTCCAGAGCAGCGACTAC    | AAGAGTGGTACTGCGGACT  | 167 | (CT)6     | 12 | S |
| RL-83  | R01_cb8564_c36175/flp0/2801  | CAGTGAACATCTTCGGGTCA    | GGATCTCATAACGAGGCCAA | 212 | (G)19     | 19 | S |
| RL-84  | R01_cb8954_c26/fl4p1/1054    | ATGGTTGCTAGCTTGATGGG    | TCTCGCCAACAACAAAATCA | 220 | (TC)27    | 54 | S |
| RL-85  | R01_cb5159_c1/f2p0/1967      | TAATCGTGCCCTAAACGGAC    | CTGCTGTCGGAATCATCGTA | 245 | (CCTT)5   | 20 | S |
| RL-86  | R01_cb5725_c15/flp0/3169     | TTCATAGGCTTCTTTCCCCA    | GGCACAAGCTTCTCCAAATC | 211 | (T)20     | 20 | S |
| RL-87  | R01_cb8463_c0/flp0/2363      | GTTTGCTGCGTGGACTGAT     | AATTCTGAAACCCCAATCC  | 109 | (GA)8     | 16 | F |
| RL-88  | R01_cb17473_c1/flp0/1511     | CAGCAAGCAATTCAAGGACA    | AGTCAAATCAGAAGCCGGTG | 268 | (CCA)11   | 33 | S |
| RL-89  | R01_cb7496_c19/flp0/1899     | GAAAAACACGACGAGGAGGA    | CCGGAGGATGTCGTGATAGT | 248 | (GAC)5    | 15 | S |
| RL-90  | R01_cb2223_c1/flp0/2395      | TGTCGAGGGAAAGACACTCC    | CTGCGTTTGGATCAAGGATT | 143 | (TTTTTA)7 | 42 | S |
| RL-91  | R01_cb6479_c3/flp0/1511      | CCAGTCAACCTCCACTCTCC    | TCCACTACCAACAACCGTGA | 184 | (CAC)5    | 15 | S |
| RL-92  | R01_cb16396_c1/flp0/1781     | CTTTTCTCCTTTCCCCAGG     | AACAAAAATCGACCGCCTC  | 267 | (TTTA)5   | 20 | S |
| RL-93  | R01_cb12114_c17/flp0/944     | TGCTAGAGATCTGCCCAAT     | ACGTAAATTGGCGAACTTGG | 263 | (CACCAA)7 | 42 | S |
| RL-94  | R01_cb6039_c33/flp0/2697     | TTCCCCAAACCCTTCTCTTT    | CAAGGAAAACAAAACCTGGG | 234 | (CT)9     | 18 | S |
| RL-95  | R01_cb4708_c2/flp0/3281      | GGCCATTGTTGAAGGCTTA     | GATCTGGATCTGGACCTGGA | 216 | (AGGTCA)6 | 36 | S |
| RL-96  | R01_cb18409_c47/flp0/1378    | CGATCGGGAGAGAAGTGAAG    | GAGAAATCCCCTTCTCCCAC | 270 | (GAG)5    | 15 | F |
| RL-97  | R01_cb5630_c2/flp0/2741      | TCATCGTTGTCACTGGGGTA    | GGCGTAGGCAAAAGCAAATA | 197 | (TTTG)5   | 20 | S |
| RL-98  | R01_cb6951_c7/flp0/2994      | GCGAGAAGTACTGAGAGCAGGAG | TGTGAACCACCTTAGTCGCA | 115 | (GAGTGG)5 | 30 | S |
| RL-99  | R01_cb3499_c6/flp1/3214      | TTCAGCTTATCCGATGGTCC    | GAAAATGGGAATGAGAGGCA | 117 | (TC)19    | 38 | S |
| RL-100 | R01_cb8564_c109799/f2p0/2167 | CCGAAAGTTGGTATCCCTCA    | CGCAAGCAATTTAAGAGCC  | 234 | (C)12     | 12 | S |
| RL-101 | R01_cb3447_c11/flp0/3760     | GATTTGGATCAAGTTGCCGT    | GACTTCCGTTTCTTTTCCC  | 221 | (GAT)6    | 18 | S |
| RL-102 | R01_cb1071_c11/flp0/3671     | TGGACTGGAAGAGGATTTGG    | GTTCCAATCGAAGAGCTGGA | 196 | (CGT)5    | 15 | F |

|        |                              |                         |                        |     |           |     |   |
|--------|------------------------------|-------------------------|------------------------|-----|-----------|-----|---|
| RL-103 | R01_cb8564_c107524/f9p1/2447 | TCTCTTCTCCTCGCATCCAT    | GACTCGTCGTTTTTCGAGTCC  | 226 | (TA)7     | 14  | S |
| RL-104 | R01_cb8430_c13/f1p0/2161     | CACAGTTCTCAACCCCCAGT    | TAATTCGGAGACCAACTCC    | 279 | (AGG)7    | 21  | S |
| RL-105 | R01_cb8081_c3/f1p0/2053      | GTCCGATCTTTCCAATTCCA    | AGATGTTGGCGAAGGTCTTG   | 265 | (CCTCTC)6 | 36  | S |
| RL-106 | R01_cb7094_c1/f2p0/2178      | GGCTACATCCCCATCTCTGA    | CGCTATGAGGAGTCTTGCGT   | 238 | (ATTGT)10 | 50  | S |
| RL-107 | R01_cb2374_c14/f1p1/1832     | CCACGAAAAACCACGAATCT    | GTCACTGCACCCTTGGATTT   | 207 | (GAA)5    | 15  | F |
| RL-108 | R01_cb10932_c5/f1p0/1663     | GGTTTCCGACTCCCTTATCC    | CTCGCTCTTTTGTTCAGTG    | 107 | (CTCC)5   | 20  | S |
| RL-109 | R01_cb4149_c17/f1p0/3287     | GCTCTTACCACATCTATCCAAAG | GGTTCATCAACCGGAGA      | 217 | (T)25     | 25  | S |
| RL-110 | R01_cb9216_c23/f1p0/2136     | CGCACTCGTCCTTCAATTT     | TCTTCGTCTGAGAATTGGGG   | 174 | (CGA)5    | 15  | F |
| RL-111 | R01_cb8564_c3944/f1p1/2003   | ATGACATAACCTTGCCCTCG    | TGCATACAGGGGCAGACATA   | 168 | (T)13     | 13  | S |
| RL-112 | R01_cb9460_c1/f1p1/2232      | GGCATTAAACCAACCACCTG    | ACTACTGCAGTCACGCCCT    | 134 | (GA)12    | 24  | S |
| RL-113 | R01_cb4273_c8/f1p1/2969      | ACCCACAGCTGCTGCTACTT    | GCAGTTTCTTCTGCCAAG     | 135 | (CTC)6    | 18  | S |
| RL-114 | R01_cb1049_c14/f1p0/3390     | CTTCTCACACTCCTCCCTCC    | TGCTTATGCGATCAAGCAAC   | 267 | (CT)13    | 26  | S |
| RL-115 | R01_cb4083_c1/f1p0/3439      | GCCCCAAAGAGAAATCAGCA    | AATTAGCCCCCAAATCCGT    | 172 | (TTTTTC)5 | 25  | F |
| RL-116 | R01_cb3007_c4/f1p0/3121      | TTGTTCAATTCAAGGGAGGG    | CTGACCAGAGTCCACCCAT    | 203 | (AGA)17   | 51  | S |
| RL-117 | R01_cb12642_c3/f1p1/1037     | ACCCATCCAAAAACAACCAA    | TCCAAC TTCCA ACTTTTCCG | 269 | (CCCAT)5  | 25  | S |
| RL-118 | R01_cb8564_c38965/f1p0/4733  | ATATCACAAGGTTTCGGCTCG   | TGGTTAAACCGAGCTTGAG    | 280 | (GA)78    | 156 | S |
| RL-119 | R01_cb9355_c3/f1p0/2134      | TAATCGAGGATCTGGATCGG    | CTTGTGGTCCTTGAGCCCTA   | 273 | (TTC)5    | 15  | S |
| RL-120 | R01_cb8154_c9/f1p0/2424      | AGCTTGATTACCAACCCACG    | AGGGTTCTTATCAGGGTGCC   | 247 | (AGGAG)6  | 30  | S |
| RL-121 | R01_cb2209_c60/f1p0/2964     | CAAGATGACGAAAACAGCCA    | GTACCATTGTTGGTGGGAGG   | 178 | (TCC)5    | 15  | S |
| RL-122 | R01_cb10210_c2/f1p0/963      | GACAGCACTTCTAGGGCACC    | CTTCGACGGAGGAGAAAGTG   | 214 | (CGA)6    | 18  | S |
| RL-123 | R01_cb8564_c41144/f1p0/3785  | GATTGAGGAGGCGATTTTGA    | ATGTTGCTTCGCACTTGTTG   | 255 | (CT)9     | 18  | F |
| RL-124 | R01_cb6844_c9/f1p0/2576      | GATCTTCATCACTCCAGTCTCC  | GACGGATGTAGTGATCCGGT   | 173 | (GA)21    | 42  | S |
| RL-125 | R01_cb6445_c2/f3p0/1815      | GCATGCAGCTTGGCATACTA    | CCAGGGGAACAATTAGGGTT   | 258 | (TCA)5    | 15  | S |
| RL-126 | R01_cb8910_c5/f1p1/1988      | AAAAGACAACCGTTTCCACG    | TTCAAAACCTGACCACCTC    | 226 | (CGG)6    | 18  | S |
| RL-127 | R01_cb5219_c6/f1p0/2921      | ATTCTCAACCTCCGTCATCG    | ACAATGCATCCGCATACTCA   | 249 | (TC)12    | 24  | S |
| RL-128 | R01_cb8564_c71334/f1p2/4671  | GGTCGGGAATTACGTCAAGA    | CAAACCCTCCCTTCCTTTTC   | 168 | (GGA)6    | 18  | S |

|        |                             |                      |                       |     |           |    |   |
|--------|-----------------------------|----------------------|-----------------------|-----|-----------|----|---|
| RL-129 | R01_cb5373_c4/f1p0/2557     | TTGAAGCCTTACAGGATGGG | AACACCGAATTGGGTCAAG   | 187 | (AAGGGA)9 | 54 | S |
| RL-130 | R01_cb8055_c3/f1p0/2885     | GCATGGCGAAGTTTTGAGTT | GACCCTGTTGTTCTCCGTGT  | 160 | (TC)15    | 30 | F |
| RL-131 | R01_cb8564_c89073/f1p0/3953 | CATCGTTGAAGAAGCTTTGG | CCCAAAGGATAGGGGGTAAA  | 111 | (G)16     | 16 | F |
| RL-132 | R01_cb3464_c2/f1p0/4818     | AAAAGACCCCCTCAGAGGAC | ATTTGAATTCGCCAGTTCCC  | 246 | (AAAGAC)8 | 48 | S |
| RL-133 | R01_cb123_c6/f1p0/5119      | GTCAAAGCTGTGCAAAACCA | AAACATATTCGTCCCCACA   | 228 | (TGG)8    | 24 | S |
| RL-134 | R01_cb1626_c21/f5p1/2846    | CTGCAATCGGTTTTGGTTTT | AGGGTTATTGGGATTCAGGG  | 260 | (GA)9     | 18 | S |
| RL-135 | R01_cb4629_c1/f1p0/3400     | TGAGGACGGAGGAGAGGTTA | CAACATCCTCGCCTTCAACT  | 266 | (GGGAGA)5 | 30 | S |
| RL-136 | R01_cb12167_c8/f1p1/1686    | TCTATTTTTGCAGGCAAGGG | GGTGTGCATCAGCAGCTAAA  | 198 | (AG)6     | 12 | S |
| RL-137 | R01_cb816_c19/f7p1/2220     | AGGGAAGTCGGAGAGGAGAG | AGAATCACCACCGCAATAG   | 190 | (AGG)5    | 15 | S |
| RL-138 | R01_cb9894_c3/f1p0/2048     | TTCTTTTCGGCCCATACTTG | TTCCCTCCTAATTGATTGGC  | 158 | (TTA)7    | 21 | S |
| RL-139 | R01_cb7910_c1/f1p0/2504     | AACGTGGTACCAGGGAGTTG | TGTTTCACAAACCACATGATT | 256 | (ATAAA)5  | 25 | S |
| RL-140 | R01_cb3756_c11/f1p1/4447    | TGGGGAGATTGAGGGTACAG | AGTTTGCTGCGTGCTTACT   | 194 | (CGT)7    | 21 | F |
| RL-141 | R01_cb6517_c51/f1p0/2780    | CCTTCCAAGTCCTGAACAA  | AGCTTCGCTTTCCTCCATTT  | 136 | (TC)9     | 18 | S |
| RL-142 | R01_cb12923_c5/f1p0/841     | AATTGACCGCGTCTGGTAAG | CCCCTCATTTCCTCTTCCTC  | 216 | (CGAAGC)5 | 30 | S |
| RL-143 | R01_cb8564_c84790/f1p0/2014 | TCAAGAAATGGCCCTGAAAC | GGCACGGCTCTAATGATCTC  | 200 | (T)21     | 21 | S |
| RL-144 | R01_cb3448_c1/f1p1/3690     | CTGATCACAATGCCACCTTG | CTTTCTCGGCAGTTCAAACC  | 273 | (AGA)6    | 18 | S |
| RL-145 | R01_cb3077_c6/f1p0/2976     | GAACATGCTTCCCTCAGC   | TGGAGGTGGGTGGAGTAGAG  | 162 | (CCA)5    | 15 | F |
| RL-146 | R01_cb13264_c4/f1p0/876     | AGATGGATTGGGTGTGGAAA | AAGCAAAGGGGTTCGAAGAT  | 112 | (AT)6     | 12 | S |
| RL-147 | R01_cb9355_c7/f1p0/1785     | TCAAAGATAGCTCCCCTCCA | TGAACACAGCAATTTGACAAC | 222 | (TTC)15   | 45 | S |
| RL-148 | R01_cb9788_c14/f1p0/4165    | GGAAAGCAGAAAATCACCCA | CCCCATCTAGGCTGGAAAAT  | 199 | (TTCTT)5  | 25 | S |
| RL-149 | R01_cb10624_c1/f1p0/1176    | GGCTTTGAAGCATTCTCCTG | ACGTTTTACACAGCCTCGCT  | 177 | (GA)11    | 22 | F |
| RL-150 | R01_cb3500_c30/f4p2/3424    | GCTCTAGAATTGGCGACGAC | CCACCTATCCTCCTCGATCA  | 279 | (GCC)6    | 18 | S |

S and F separately represent amplification success and amplification failure.
